# Supplementary material for: METSP: A Maximum-Entropy Classifier Based Text Mining Tool for Transporter-Substrate Identification with Semistructured Text
Source: Hindawi journal article supplement (doi:10.1155/2015/254838), 2015-01-01
Supplement: f1 [file 254838.f1.zip]

**Additional file 2 – Training set includes 41,332 instances in the format of “label + accession number + field flag + a sentence”.**

| Positive_or<br>negative | UniProt_AC | Annotatation_field | Annotation_detail                                                                                                                                                                                          |
|-------------------------|------------|--------------------|------------------------------------------------------------------------------------------------------------------------------------------------------------------------------------------------------------|
| P                       | A0KG33     | CC                 | Na <sup>+</sup> /H <sup>+</sup> antiporter that extrudes sodium in exchange for external protons (By similarity).                                                                                          |
| P                       | A0KG33     | DE                 | Na <sup>+</sup> /H <sup>+</sup> antiporter nhaA;                                                                                                                                                           |
| P                       | A0KG33     | DE                 | Sodium/proton antiporter nhaA;                                                                                                                                                                             |
| P                       | A0KG66     | CC                 | H <sup>+</sup> -stimulated, highly selective, manganese uptake system (By similarity).                                                                                                                     |
| P                       | A0KG66     | DE                 | Probable manganese transport protein mntH;                                                                                                                                                                 |
| P                       | A0KJR8     | CC                 | Transport of potassium into the cell (By similarity).                                                                                                                                                      |
| P                       | A0KJR8     | DE                 | Probable potassium transport system protein kup 1;                                                                                                                                                         |
| P                       | A0KJR8     | DR                 | potassium ion transmembrane transporter activity                                                                                                                                                           |
| P                       | A0KL02     | CC                 | Involved in the import of serine and threonine into the cell, with the concomitant import of sodium (symport system) (By similarity).                                                                      |
| P                       | A0KL02     | DE                 | Na <sup>+</sup> /serine-threonine symporter;                                                                                                                                                               |
| P                       | A0KL02     | DR                 | sodium:dicarboxylate symporter activity                                                                                                                                                                    |
| P                       | A0KL02     | DR                 | sodium:dicarboxylate symporter activity                                                                                                                                                                    |
| P                       | A0KL08     | CC                 | Na <sup>+</sup> /H <sup>+</sup> antiporter that extrudes sodium in exchange for external protons (By similarity).                                                                                          |
| P                       | A0KL08     | DE                 | Na <sup>+</sup> /H <sup>+</sup> antiporter nhaB;                                                                                                                                                           |
| P                       | A0KL08     | DE                 | Sodium/proton antiporter nhaB;                                                                                                                                                                             |
| P                       | A0KL08     | DR                 | sodium:hydrogen antiporter activity                                                                                                                                                                        |
| P                       | A0KL61     | CC                 | Transport of potassium into the cell (By similarity).                                                                                                                                                      |
| P                       | A0KL61     | DE                 | Probable potassium transport system protein kup 2;                                                                                                                                                         |
| P                       | A0KL61     | DR                 | potassium ion transmembrane transporter activity                                                                                                                                                           |
| P                       | A0KPH6     | CC                 | Part of the ABC transporter complex ZnuABC involved in zinc import                                                                                                                                         |
| P                       | A0KPH6     | DE                 | Zinc import ATP-binding protein ZnuC;                                                                                                                                                                      |
| P                       | A0KPH6     | DR                 | zinc transporting ATPase activity                                                                                                                                                                          |
| P                       | A0LJ91     | CC                 | Transport of potassium into the cell (By similarity).                                                                                                                                                      |
| P                       | A0LJ91     | DE                 | Probable potassium transport system protein kup 1;                                                                                                                                                         |
| P                       | A0LJ91     | DR                 | potassium ion transmembrane transporter activity                                                                                                                                                           |
| P                       | A0LLE6     | CC                 | Na <sup>+</sup> /H <sup>+</sup> antiporter that extrudes sodium in exchange for external protons (By similarity).                                                                                          |
| P                       | A0LLE6     | DE                 | Na <sup>+</sup> /H <sup>+</sup> antiporter nhaA;                                                                                                                                                           |
| P                       | A0LLE6     | DE                 | Sodium/proton antiporter nhaA;                                                                                                                                                                             |
| P                       | A0LP92     | CC                 | Transport of potassium into the cell (By similarity).                                                                                                                                                      |
| P                       | A0LP92     | DE                 | Probable potassium transport system protein kup 2;                                                                                                                                                         |
| P                       | A0LP92     | DR                 | potassium ion transmembrane transporter activity                                                                                                                                                           |
| P                       | A0LUE6     | CC                 | Part of the ABC transporter complex PotABCD involved in spermidine/putrescine import                                                                                                                       |
| P                       | A0LUE6     | CC                 | Part of the ABC transporter complex PotABCD involved in spermidine/putrescine import                                                                                                                       |
| P                       | A0LUE6     | DE                 | Spermidine/putrescine import ATP-binding protein PotA;                                                                                                                                                     |
| P                       | A0LUE6     | DE                 | Spermidine/putrescine import ATP-binding protein PotA;                                                                                                                                                     |
| P                       | A0M0N2     | CC                 | Na <sup>+</sup> /H <sup>+</sup> antiporter that extrudes sodium in exchange for external protons (By similarity).                                                                                          |
| P                       | A0M0N2     | DE                 | Na <sup>+</sup> /H <sup>+</sup> antiporter nhaA;                                                                                                                                                           |
| P                       | A0M0N2     | DE                 | Sodium/proton antiporter nhaA;                                                                                                                                                                             |
| P                       | A0PJK1     | DE                 | Na <sup>+</sup> /glucose cotransporter 5;                                                                                                                                                                  |
| P                       | A0PJK1     | DE                 | Na <sup>+</sup> /glucose cotransporter 5;                                                                                                                                                                  |
| P                       | A0PJK1     | DE                 | Sodium/glucose cotransporter 5;                                                                                                                                                                            |
| P                       | A0PJK1     | DE                 | Sodium/glucose cotransporter 5;                                                                                                                                                                            |
| P                       | A0QQ68     | DR                 | phosphonate transmembrane transporter activity                                                                                                                                                             |
| P                       | A0QQ70     | DR                 | phosphonate transmembrane-transporting ATPase activity                                                                                                                                                     |
| P                       | A0QQ71     | DR                 | phosphonate transmembrane transporter activity                                                                                                                                                             |
| P                       | A0QW18     | CC                 | Na <sup>+</sup> /H <sup>+</sup> antiporter that extrudes sodium in exchange for external protons (By similarity).                                                                                          |
| P                       | A0QW18     | DE                 | Na <sup>+</sup> /H <sup>+</sup> antiporter nhaA;                                                                                                                                                           |
| P                       | A0QW18     | DE                 | Sodium/proton antiporter nhaA;                                                                                                                                                                             |
| P                       | A0R395     | CC                 | One of the components of the high-affinity ATP-driven potassium transport (or KDP) system, which catalyzes the hydrolysis of ATP coupled with the exchange of hydrogen and potassium ions (By similarity). |
| P                       | A0R395     | DE                 | Potassium-binding and translocating subunit A;                                                                                                                                                             |
| P                       | A0R395     | DE                 | Potassium-translocating ATPase A chain;                                                                                                                                                                    |
| P                       | A0R395     | DE                 | Potassium-transporting ATPase A chain;                                                                                                                                                                     |
| P                       | A0R395     | DR                 | potassium-transporting ATPase activity                                                                                                                                                                     |

|   |        |    |                                                                                                                                                                                                                  |
|---|--------|----|------------------------------------------------------------------------------------------------------------------------------------------------------------------------------------------------------------------|
| P | A0R4C0 | CC | Part of the ABC transporter complex PstSACB involved in phosphate import                                                                                                                                         |
| P | A0R4C0 | DE | ABC phosphate transporter;                                                                                                                                                                                       |
| P | A0R4C0 | DE | Phosphate import ATP-binding protein PstB;                                                                                                                                                                       |
| P | A0R4C0 | DE | Phosphate-transporting ATPase;                                                                                                                                                                                   |
| P | A0R4C0 | DR | inorganic phosphate transmembrane transporter activity                                                                                                                                                           |
| P | A0R4C0 | DR | phosphate transmembrane-transporting ATPase activity                                                                                                                                                             |
| P | A1KHG8 | CC | One of the components of the high-affinity ATP-driven potassium transport (or KDP) system, which catalyzes the hydrolysis of ATP coupled with the exchange of hydrogen and potassium ions (By similarity).       |
| P | A1KHG8 | DE | Potassium-binding and translocating subunit A;                                                                                                                                                                   |
| P | A1KHG8 | DE | Potassium-translocating ATPase A chain;                                                                                                                                                                          |
| P | A1KHG8 | DE | Potassium-transporting ATPase A chain;                                                                                                                                                                           |
| P | A1KHG8 | DR | potassium-transporting ATPase activity                                                                                                                                                                           |
| P | A1KHH0 | CC | One of the components of the high-affinity ATP-driven potassium transport (or KDP) system, which catalyzes the hydrolysis of ATP coupled with the exchange of hydrogen and potassium ions                        |
| P | A1KHH0 | DE | Potassium-binding and translocating subunit C;                                                                                                                                                                   |
| P | A1KHH0 | DE | Potassium-translocating ATPase C chain;                                                                                                                                                                          |
| P | A1KHH0 | DE | Potassium-transporting ATPase C chain;                                                                                                                                                                           |
| P | A1KHH0 | DR | potassium-transporting ATPase activity                                                                                                                                                                           |
| P | A1R4H0 | CC | Na <sup>+</sup> /H <sup>+</sup> antiporter that extrudes sodium in exchange for external protons (By similarity).                                                                                                |
| P | A1R4H0 | DE | Na <sup>+</sup> /H <sup>+</sup> antiporter nhaA;                                                                                                                                                                 |
| P | A1R4H0 | DE | Sodium/proton antiporter nhaA;                                                                                                                                                                                   |
| P | A1WXT0 | CC | Part of the ABC transporter complex ZnuABC involved in zinc import                                                                                                                                               |
| P | A1WXT0 | DE | Zinc import ATP-binding protein ZnuC;                                                                                                                                                                            |
| P | A1WXT0 | DR | zinc transporting ATPase activity                                                                                                                                                                                |
| P | A2AJN7 | DE | Bicarbonate transporter-related protein 1;                                                                                                                                                                       |
| P | A2BDX4 | CC | Probable potassium channel subunit                                                                                                                                                                               |
| P | A2BDX4 | DE | Potassium voltage-gated channel subfamily G member 1;                                                                                                                                                            |
| P | A2BDX4 | DE | Voltage-gated potassium channel subunit Kv6.1;                                                                                                                                                                   |
| P | A2BDX4 | DR | voltage-gated potassium channel activity                                                                                                                                                                         |
| P | A2RUL8 | DE | Potassium voltage-gated channel, delayed-rectifier, subfamily S, member 1, isoform CRA_b;                                                                                                                        |
| P | A2RUL8 | DE | cDNA FLJ75995, highly similar to Homo sapiens potassium voltage-gated channel, delayed-rectifier, subfamily S, member 1 (KCNS1), mRNA;                                                                           |
| P | A2RUL8 | DR | voltage-gated potassium channel activity                                                                                                                                                                         |
| P | A3BV82 | CC | Putative magnesium transporter (By similarity).                                                                                                                                                                  |
| P | A3BV82 | DE | Putative magnesium transporter MRS2-G;                                                                                                                                                                           |
| P | A3CMQ7 | CC | Part of the ABC transporter complex POTABCD involved in spermidine/putrescine import                                                                                                                             |
| P | A3CMQ7 | CC | Part of the ABC transporter complex POTABCD involved in spermidine/putrescine import                                                                                                                             |
| P | A3CMQ7 | DE | Spermidine/putrescine import ATP-binding protein PotA;                                                                                                                                                           |
| P | A3CMQ7 | DE | Spermidine/putrescine import ATP-binding protein PotA;                                                                                                                                                           |
| P | A3KLL5 | CC | This is the non-catalytic component of the active enzyme, which catalyzes the hydrolysis of ATP coupled with the exchange of Na <sup>+</sup> and K <sup>+</sup> ions across the plasma membrane (By similarity). |
| P | A3KLL5 | CC | This is the non-catalytic component of the active enzyme, which catalyzes the hydrolysis of ATP coupled with the exchange of Na <sup>+</sup> and K <sup>+</sup> ions across the plasma membrane (By similarity). |
| P | A3KLL5 | DE | ATPase, Na <sup>+</sup> /K <sup>+</sup> transporting, beta 1 polypeptide, isoform CRA_a;                                                                                                                         |
| P | A3KLL5 | DE | ATPase, Na <sup>+</sup> /K <sup>+</sup> transporting, beta 1 polypeptide, isoform CRA_a;                                                                                                                         |
| P | A3KLL5 | DE | cDNA FLJ76773, highly similar to Homo sapiens ATPase, Na <sup>+</sup> /K <sup>+</sup> transporting, beta 1 polypeptide (ATP1B1), transcript variant 1, mRNA;                                                     |
| P | A3KLL5 | DE | cDNA FLJ76773, highly similar to Homo sapiens ATPase, Na <sup>+</sup> /K <sup>+</sup> transporting, beta 1 polypeptide (ATP1B1), transcript variant 1, mRNA;                                                     |
| P | A3M0N3 | DE | Glucose transporter/sensor;                                                                                                                                                                                      |
| P | A4D0V9 | DE | Potassium voltage-gated channel, Shal-related subfamily, member 2;                                                                                                                                               |
| P | A4IVT5 | CC | Na <sup>+</sup> /H <sup>+</sup> antiporter that extrudes sodium in exchange for external protons (By similarity).                                                                                                |
| P | A4IVT5 | DE | Na <sup>+</sup> /H <sup>+</sup> antiporter nhaA;                                                                                                                                                                 |
| P | A4IVT5 | DE | Sodium/proton antiporter nhaA;                                                                                                                                                                                   |
| P | A4IVV7 | CC | One of the components of the high-affinity ATP-driven potassium transport (or KDP) system, which catalyzes the hydrolysis of ATP coupled with the exchange of hydrogen and potassium ions (By similarity).       |

|   |        |    |                                                                                                                                                                                           |
|---|--------|----|-------------------------------------------------------------------------------------------------------------------------------------------------------------------------------------------|
| P | A4IVV7 | DE | Potassium-binding and translocating subunit A;                                                                                                                                            |
| P | A4IVV7 | DE | Potassium-translocating ATPase A chain;                                                                                                                                                   |
| P | A4IVV7 | DE | Potassium-transporting ATPase A chain;                                                                                                                                                    |
| P | A4IVV7 | DR | potassium-transporting ATPase activity                                                                                                                                                    |
| P | A4SE48 | CC | Mediates zinc uptake                                                                                                                                                                      |
| P | A4SE48 | DE | Zinc transporter ZupT;                                                                                                                                                                    |
| P | A4SGR1 | CC | Transport of potassium into the cell (By similarity).                                                                                                                                     |
| P | A4SGR1 | DE | Probable potassium transport system protein kup;                                                                                                                                          |
| P | A4SGR1 | DR | potassium ion transmembrane transporter activity                                                                                                                                          |
| P | A5EHA3 | CC | Transport of potassium into the cell (By similarity).                                                                                                                                     |
| P | A5EHA3 | DE | Probable potassium transport system protein kup 1;                                                                                                                                        |
| P | A5EHA3 | DR | potassium ion transmembrane transporter activity                                                                                                                                          |
| P | A5EHG1 | CC | Transport of potassium into the cell (By similarity).                                                                                                                                     |
| P | A5EHG1 | DE | Probable potassium transport system protein kup 2;                                                                                                                                        |
| P | A5EHG1 | DR | potassium ion transmembrane transporter activity                                                                                                                                          |
| P | A5EHG2 | CC | Transport of potassium into the cell (By similarity).                                                                                                                                     |
| P | A5EHG2 | DE | Probable potassium transport system protein kup 3;                                                                                                                                        |
| P | A5EHG2 | DR | potassium ion transmembrane transporter activity                                                                                                                                          |
| P | A5EQ10 | CC | One of the components of the high-affinity ATP-driven potassium transport (or KDP) system, which catalyzes the hydrolysis of ATP coupled with the exchange of hydrogen and potassium ions |
| P | A5EQ10 | DE | Potassium-binding and translocating subunit C;                                                                                                                                            |
| P | A5EQ10 | DE | Potassium-translocating ATPase C chain;                                                                                                                                                   |
| P | A5EQ10 | DE | Potassium-transporting ATPase C chain;                                                                                                                                                    |
| P | A5EQ10 | DR | potassium-transporting ATPase activity                                                                                                                                                    |
| P | A5ESW9 | CC | Transport of potassium into the cell (By similarity).                                                                                                                                     |
| P | A5ESW9 | DE | Probable potassium transport system protein kup 4;                                                                                                                                        |
| P | A5ESW9 | DR | potassium ion transmembrane transporter activity                                                                                                                                          |
| P | A5VNX4 | CC | Na <sup>+</sup> /H <sup>+</sup> antiporter that extrudes sodium in exchange for external protons (By similarity).                                                                         |
| P | A5VNX4 | DE | Na <sup>+</sup> /H <sup>+</sup> antiporter nhaA;                                                                                                                                          |
| P | A5VNX4 | DE | Sodium/proton antiporter nhaA;                                                                                                                                                            |
| P | A5VRD1 | CC | Transport of potassium into the cell (By similarity).                                                                                                                                     |
| P | A5VRD1 | DE | Probable potassium transport system protein kup;                                                                                                                                          |
| P | A5VRD1 | DR | potassium ion transmembrane transporter activity                                                                                                                                          |
| P | A5X2V1 | DE | Amiloride-sensitive sodium channel gamma-subunit;                                                                                                                                         |
| P | A5X2V1 | DE | Nasal epithelial sodium channel gamma subunit;                                                                                                                                            |
| P | A5X2V1 | DE | Sodium channel, nonvoltage-gated 1, gamma, isoform CRA_a;                                                                                                                                 |
| P | A6H8H5 | CC | Channels open or close in response to the voltage difference across the membrane, letting potassium ions pass in accordance with their electrochemical gradient (By similarity).          |
| P | A6H8H5 | CC | mediates the voltage-dependent potassium ion permeability of exchange membrane                                                                                                            |
| P | A6H8H5 | DE | Potassium voltage-gated channel subfamily B member 2;                                                                                                                                     |
| P | A6H8H5 | DE | Voltage-gated potassium channel subunit Kv2.2;                                                                                                                                            |
| P | A6H8H5 | DR | voltage-gated potassium channel activity                                                                                                                                                  |
| P | A6Q0Z0 | CC | Na <sup>+</sup> /H <sup>+</sup> antiporter that extrudes sodium in exchange for external protons (By similarity).                                                                         |
| P | A6Q0Z0 | DE | Na <sup>+</sup> /H <sup>+</sup> antiporter nhaA;                                                                                                                                          |
| P | A6Q0Z0 | DE | Sodium/proton antiporter nhaA;                                                                                                                                                            |
| P | A6T4F6 | CC | Na <sup>+</sup> /H <sup>+</sup> antiporter that extrudes sodium in exchange for external protons (By similarity).                                                                         |
| P | A6T4F6 | DE | Na <sup>+</sup> /H <sup>+</sup> antiporter nhaA 1;                                                                                                                                        |
| P | A6T4F6 | DE | Sodium/proton antiporter nhaA 1;                                                                                                                                                          |
| P | A6T4I3 | CC | Transport system that facilitates potassium-efflux, possibly by potassium-proton antiport (By similarity).                                                                                |
| P | A6T4I3 | DE | Glutathione-regulated potassium-efflux system protein kefC;                                                                                                                               |
| P | A6T4I3 | DE | K <sup>+</sup> /H <sup>+</sup> antiporter;                                                                                                                                                |
| P | A6T4V9 | CC | Functions as antiport system and exchanges two chloride ions for 1 proton                                                                                                                 |
| P | A6T4V9 | CC | Proton-coupled chloride transporter                                                                                                                                                       |
| P | A6T4V9 | DR | voltage-gated chloride channel activity                                                                                                                                                   |
| P | A6T6D7 | CC | One of the components of the high-affinity ATP-driven potassium transport (or KDP) system, which catalyzes the hydrolysis of ATP coupled with the exchange of hydrogen and potassium ions |
| P | A6T6D7 | DE | Potassium-binding and translocating subunit C;                                                                                                                                            |
| P | A6T6D7 | DE | Potassium-translocating ATPase C chain;                                                                                                                                                   |

|   |        |    |                                                                                                                                                                                                            |
|---|--------|----|------------------------------------------------------------------------------------------------------------------------------------------------------------------------------------------------------------|
| P | A6T6D7 | DE | Potassium-transporting ATPase C chain;                                                                                                                                                                     |
| P | A6T6D7 | DR | potassium-transporting ATPase activity                                                                                                                                                                     |
| P | A6T6D8 | CC | One of the components of the high-affinity ATP-driven potassium transport (or KDP) system, which catalyzes the hydrolysis of ATP coupled with the exchange of hydrogen and potassium ions (By similarity). |
| P | A6T6D8 | DE | Potassium-binding and translocating subunit B;                                                                                                                                                             |
| P | A6T6D8 | DE | Potassium-translocating ATPase B chain;                                                                                                                                                                    |
| P | A6T6D8 | DE | Potassium-transporting ATPase B chain;                                                                                                                                                                     |
| P | A6T6D8 | DR | potassium-transporting ATPase activity                                                                                                                                                                     |
| P | A6T6D9 | CC | One of the components of the high-affinity ATP-driven potassium transport (or KDP) system, which catalyzes the hydrolysis of ATP coupled with the exchange of hydrogen and potassium ions (By similarity). |
| P | A6T6D9 | DE | Potassium-binding and translocating subunit A;                                                                                                                                                             |
| P | A6T6D9 | DE | Potassium-translocating ATPase A chain;                                                                                                                                                                    |
| P | A6T6D9 | DE | Potassium-transporting ATPase A chain;                                                                                                                                                                     |
| P | A6T6D9 | DR | potassium-transporting ATPase activity                                                                                                                                                                     |
| P | A6TAH6 | CC | Part of the ABC transporter complex BtuCDF involved in vitamin B12 import                                                                                                                                  |
| P | A6TAH6 | DE | Vitamin B12 import system permease protein BtuC;                                                                                                                                                           |
| P | A6TAU9 | CC | Involved in the import of threonine and serine into the cell, with the concomitant import of a proton (symport system) (By similarity).                                                                    |
| P | A6TAU9 | DE | Threonine/serine transporter TdcC;                                                                                                                                                                         |
| P | A6TAW7 | CC | Na <sup>+</sup> /H <sup>+</sup> antiporter that extrudes sodium in exchange for external protons (By similarity)                                                                                           |
| P | A6TAW7 | DE | Na <sup>+</sup> /H <sup>+</sup> antiporter nhaB;                                                                                                                                                           |
| P | A6TAW7 | DE | Sodium/proton antiporter nhaB;                                                                                                                                                                             |
| P | A6TAW7 | DR | sodium:hydrogen antiporter activity                                                                                                                                                                        |
| P | A6TC38 | CC | H <sup>+</sup> -stimulated, highly selective, manganese uptake system (By similarity).                                                                                                                     |
| P | A6TC38 | DE | Probable manganese transport protein mntH;                                                                                                                                                                 |
| P | A6TDB4 | DR | cobalt ion transmembrane transporter activity                                                                                                                                                              |
| P | A6TDS8 | CC | Important to control the intracellular level of arginine and the correct balance between arginine and lysine (By similarity).                                                                              |
| P | A6TEC8 | CC | Involved in the import of serine and threonine into the cell, with the concomitant import of sodium (symport system) (By similarity).                                                                      |
| P | A6TEC8 | CC | Involved in the import of serine and threonine into the cell, with the concomitant import of sodium (symport system) (By similarity).                                                                      |
| P | A6TEC8 | DE | Na <sup>+</sup> /serine-threonine symporter;                                                                                                                                                               |
| P | A6TEC8 | DE | Na <sup>+</sup> /serine-threonine symporter;                                                                                                                                                               |
| P | A6TEC8 | DE | Serine/threonine transporter sstT;                                                                                                                                                                         |
| P | A6TEC8 | DR | sodium:dicarboxylate symporter activity                                                                                                                                                                    |
| P | A6TEY9 | CC | Transport system that facilitates potassium-efflux, possibly by potassium-proton antiport (By similarity).                                                                                                 |
| P | A6TEY9 | DE | Glutathione-regulated potassium-efflux system protein kefB;                                                                                                                                                |
| P | A6TEY9 | DE | K <sup>+</sup> /H <sup>+</sup> antiporter;                                                                                                                                                                 |
| P | A6TEY9 | DE | NEM-activatable K <sup>+</sup> /H <sup>+</sup> antiporter;                                                                                                                                                 |
| P | A6TEY9 | DR | glutathione-regulated potassium exporter activity                                                                                                                                                          |
| P | A6TFD1 | DR | sodium:dicarboxylate symporter activity                                                                                                                                                                    |
| P | A6TG51 | CC | Responsible for the low-affinity transport of potassium into the cell, with the probable concomitant uptake of protons (symport system) (By similarity).                                                   |
| P | A6TG51 | DE | Kup system potassium uptake protein;                                                                                                                                                                       |
| P | A6TG51 | DE | Low affinity potassium transport system protein kup;                                                                                                                                                       |
| P | A6TG51 | DR | potassium ion transmembrane transporter activity                                                                                                                                                           |
| P | A6TJ58 | CC | Na <sup>+</sup> /H <sup>+</sup> antiporter that extrudes sodium in exchange for external protons (By similarity)                                                                                           |
| P | A6TJ58 | DE | Na <sup>+</sup> /H <sup>+</sup> antiporter nhaA 2;                                                                                                                                                         |
| P | A6TJ58 | DE | Sodium/proton antiporter nhaA 2;                                                                                                                                                                           |
| P | A6U6M1 | CC | Transport of potassium into the cell (By similarity).                                                                                                                                                      |
| P | A6U6M1 | DE | Probable potassium transport system protein kup 1;                                                                                                                                                         |
| P | A6U6M1 | DR | potassium ion transmembrane transporter activity                                                                                                                                                           |
| P | A6UH53 | DR | sodium:dicarboxylate symporter activity                                                                                                                                                                    |
| P | A6UM20 | CC | Transport of potassium into the cell (By similarity).                                                                                                                                                      |
| P | A6UM20 | DE | Probable potassium transport system protein kup 2;                                                                                                                                                         |
| P | A6UM20 | DR | potassium ion transmembrane transporter activity                                                                                                                                                           |
| P | A6UMS8 | CC | Transport of potassium into the cell (By similarity).                                                                                                                                                      |
| P | A6UMS8 | DE | Probable potassium transport system protein kup 3;                                                                                                                                                         |
| P | A6UMS8 | DR | potassium ion transmembrane transporter activity                                                                                                                                                           |
| P | A6VKS8 | CC | Part of the ABC transporter complex RbsABCD involved in ribose import                                                                                                                                      |
| P | A7HZF9 | CC | Na <sup>+</sup> /H <sup>+</sup> antiporter that extrudes sodium in exchange for external protons (By similarity)                                                                                           |

|   |        |    |                                                                                                                                                                                                            |
|---|--------|----|------------------------------------------------------------------------------------------------------------------------------------------------------------------------------------------------------------|
| P | A7HZF9 | DE | Na <sup>+</sup> /H <sup>+</sup> antiporter nhaA 1;                                                                                                                                                         |
| P | A7HZF9 | DE | Sodium/proton antiporter nhaA 1;                                                                                                                                                                           |
| P | A7I1I1 | CC | Na <sup>+</sup> /H <sup>+</sup> antiporter that extrudes sodium in exchange for external protons (By similarity).                                                                                          |
| P | A7I1I1 | DE | Na <sup>+</sup> /H <sup>+</sup> antiporter nhaA 2;                                                                                                                                                         |
| P | A7I1I1 | DE | Sodium/proton antiporter nhaA 2;                                                                                                                                                                           |
| P | A7I2B9 | CC | Involved in the import of serine and threonine into the cell, with the concomitant import of sodium (symport system) (By similarity).                                                                      |
| P | A7I2B9 | CC | Involved in the import of serine and threonine into the cell, with the concomitant import of sodium (symport system) (By similarity).                                                                      |
| P | A7I2B9 | DE | Na <sup>+</sup> /serine-threonine symporter;                                                                                                                                                               |
| P | A7I2B9 | DE | Na <sup>+</sup> /serine-threonine symporter;                                                                                                                                                               |
| P | A7I2B9 | DE | Serine/threonine transporter sstT;                                                                                                                                                                         |
| P | A7I2B9 | DR | sodium:dicarboxylate symporter activity                                                                                                                                                                    |
| P | A7ZUZ0 | DE | Melibiose carrier protein;                                                                                                                                                                                 |
| P | A8EUK5 | CC | Na <sup>+</sup> /H <sup>+</sup> antiporter that extrudes sodium in exchange for external protons (By similarity).                                                                                          |
| P | A8EUK5 | DE | Na <sup>+</sup> /H <sup>+</sup> antiporter nhaA 1;                                                                                                                                                         |
| P | A8EUK5 | DE | Sodium/proton antiporter nhaA 1;                                                                                                                                                                           |
| P | A8EVL5 | CC | Na <sup>+</sup> /H <sup>+</sup> antiporter that extrudes sodium in exchange for external protons (By similarity).                                                                                          |
| P | A8EVL5 | DE | Na <sup>+</sup> /H <sup>+</sup> antiporter nhaA 2;                                                                                                                                                         |
| P | A8EVL5 | DE | Sodium/proton antiporter nhaA 2;                                                                                                                                                                           |
| P | A8HY21 | CC | One of the components of the high-affinity ATP-driven potassium transport (or KDP) system, which catalyzes the hydrolysis of ATP coupled with the exchange of hydrogen and potassium ions                  |
| P | A8HY21 | DE | Potassium-binding and translocating subunit C;                                                                                                                                                             |
| P | A8HY21 | DE | Potassium-translocating ATPase C chain;                                                                                                                                                                    |
| P | A8HY21 | DE | Potassium-transporting ATPase C chain;                                                                                                                                                                     |
| P | A8HY21 | DR | potassium-transporting ATPase activity                                                                                                                                                                     |
| P | A8I126 | CC | Na <sup>+</sup> /H <sup>+</sup> antiporter that extrudes sodium in exchange for external protons (By similarity).                                                                                          |
| P | A8I126 | DE | Na <sup>+</sup> /H <sup>+</sup> antiporter nhaA;                                                                                                                                                           |
| P | A8I126 | DE | Sodium/proton antiporter nhaA;                                                                                                                                                                             |
| P | A8IDZ2 | DR | sodium:dicarboxylate symporter activity                                                                                                                                                                    |
| P | A8K7I4 | DR | chloride channel activity                                                                                                                                                                                  |
| P | A8MPY1 | CC | GABA, the major inhibitory neurotransmitter in the vertebrate brain, mediates neuronal inhibition by binding to the GABA/benzodiazepine receptor and opening an integral chloride channel (By similarity). |
| P | A8MPY1 | DR | chloride channel activity                                                                                                                                                                                  |
| P | A8MYU2 | CC | Testis-specific potassium channel activated by both intracellular pH and membrane voltage that mediates export of K <sup>+</sup>                                                                           |
| P | A8MYU2 | DE | Potassium channel subfamily U member 1;                                                                                                                                                                    |
| P | A9BJX0 | DE | Calcium-translocating P-type ATPase, PMCA-type;                                                                                                                                                            |
| P | A9BJX0 | DR | calcium-transporting ATPase activity                                                                                                                                                                       |
| P | A9C190 | CC | One of the components of the high-affinity ATP-driven potassium transport (or KDP) system, which catalyzes the hydrolysis of ATP coupled with the exchange of hydrogen and potassium ions (By similarity). |
| P | A9C190 | DE | Potassium-binding and translocating subunit A;                                                                                                                                                             |
| P | A9C190 | DE | Potassium-translocating ATPase A chain;                                                                                                                                                                    |
| P | A9C190 | DE | Potassium-transporting ATPase A chain;                                                                                                                                                                     |
| P | A9C190 | DR | potassium-transporting ATPase activity                                                                                                                                                                     |
| P | A9LNM6 | DE | Sodium activated potassium channel;                                                                                                                                                                        |
| P | B0RZB7 | DE | ATP/ADP translocase;                                                                                                                                                                                       |
| P | B0RZB7 | DE | ATP/ADP translocase;                                                                                                                                                                                       |
| P | B0RZB7 | DR | ATP:ADP antiporter activity                                                                                                                                                                                |
| P | B0RZB7 | DR | ATP:ADP antiporter activity                                                                                                                                                                                |
| P | B1L487 | DR | copper-exporting ATPase activity                                                                                                                                                                           |
| P | B1PM37 | DE | Glucose sensor;                                                                                                                                                                                            |
| P | B1PS44 | DE | Sodium channel nonvoltage-gated 1 delta;                                                                                                                                                                   |
| P | B1PS44 | DE | cDNA FLJ45431 fis, clone BRHIP3039509, highly similar to Amiloride-sensitive sodium channel subunit delta;                                                                                                 |
| P | B1PS44 | DR | ligand-gated sodium channel activity                                                                                                                                                                       |
| P | B2R812 | DE | Amiloride-sensitive sodium channel subunit beta 1;                                                                                                                                                         |
| P | B2R812 | DE | Sodium channel, nonvoltage-gated 1, beta (Liddle syndrome), isoform CRA_b;                                                                                                                                 |
| P | B2R812 | DE | cDNA, FLJ93691, highly similar to Homo sapiens sodium channel, nonvoltage-gated 1, beta (Liddle syndrome) (SCNN1B), mRNA;                                                                                  |
| P | B2R8T4 | DE | K2P10.1 potassium channel isoform 2;                                                                                                                                                                       |
| P | B2R8T4 | DE | Potassium channel, subfamily K, member 10, isoform CRA_b;                                                                                                                                                  |

|   |        |    |                                                                                                                                                                                                            |
|---|--------|----|------------------------------------------------------------------------------------------------------------------------------------------------------------------------------------------------------------|
| P | B2R8T4 | DE | cDNA, FLJ94053, Homo sapiens potassium channel, subfamily K, member 10 (CKNK10),transcript variant 2, mRNA;                                                                                                |
| P | B2RDS2 | DE | K2P6.1 potassium channel;                                                                                                                                                                                  |
| P | B2RDS2 | DE | Potassium channel, subfamily K, member 6;                                                                                                                                                                  |
| P | B2RDS2 | DE | cDNA, FLJ96744, Homo sapiens potassium channel, subfamily K, member 6 (CKNK6),mRNA;                                                                                                                        |
| P | B2RNU7 | DR | neurotransmitter:sodium symporter activity                                                                                                                                                                 |
| P | B2YGG2 | DE | Tetracycline resistance protein;                                                                                                                                                                           |
| P | B2YGG2 | DR | tetracycline:hydrogen antiporter activity                                                                                                                                                                  |
| P | B4DX48 | DR | neurotransmitter:sodium symporter activity                                                                                                                                                                 |
| P | B5TJL4 | DE | K2P10.1 potassium channel isoform 1;                                                                                                                                                                       |
| P | B5TJL4 | DE | Potassium channel, subfamily K, member 10, isoform CRA_c;                                                                                                                                                  |
| P | B5TJL4 | DR | potassium channel activity                                                                                                                                                                                 |
| P | B5TJL8 | DE | K2P13.1 potassium channel;                                                                                                                                                                                 |
| P | B5TJL8 | DE | Potassium channel, subfamily K, member 13;                                                                                                                                                                 |
| P | B5TJL8 | DR | potassium channel activity                                                                                                                                                                                 |
| P | B5XN31 | DR | sodium:dicarboxylate symporter activity                                                                                                                                                                    |
| P | B5XN76 | CC | Transport system that facilitates potassium-efflux, possibly by potassium-proton antiport (By similarity).                                                                                                 |
| P | B5XN76 | DE | Glutathione-regulated potassium-efflux system protein kefB;                                                                                                                                                |
| P | B5XN76 | DE | K <sup>+</sup> /H <sup>+</sup> antiporter;                                                                                                                                                                 |
| P | B5XN76 | DE | NEM-activatable K <sup>+</sup> /H <sup>+</sup> antiporter;                                                                                                                                                 |
| P | B5XN76 | DR | glutathione-regulated potassium exporter activity                                                                                                                                                          |
| P | B5XQ77 | CC | Na <sup>+</sup> /H <sup>+</sup> antiporter that extrudes sodium in exchange for external protons (By similarity).                                                                                          |
| P | B5XQ77 | DE | Na <sup>+</sup> /H <sup>+</sup> antiporter nhaB;                                                                                                                                                           |
| P | B5XQ77 | DE | Sodium/proton antiporter nhaB;                                                                                                                                                                             |
| P | B5XQ77 | DR | sodium:hydrogen antiporter activity                                                                                                                                                                        |
| P | B5XTX0 | CC | Involved in the import of serine and threonine into the cell, with the concomitant import of sodium (symport system) (By similarity).                                                                      |
| P | B5XTX0 | CC | Involved in the import of serine and threonine into the cell, with the concomitant import of sodium (symport system) (By similarity).                                                                      |
| P | B5XTX0 | DE | Na <sup>+</sup> /serine-threonine symporter;                                                                                                                                                               |
| P | B5XTX0 | DE | Na <sup>+</sup> /serine-threonine symporter;                                                                                                                                                               |
| P | B5XTX0 | DE | Serine/threonine transporter sstT;                                                                                                                                                                         |
| P | B5XTX0 | DR | sodium:dicarboxylate symporter activity                                                                                                                                                                    |
| P | B5XUC1 | CC | Important to control the intracellular level of arginine and the correct balance between arginine and lysine (By similarity).                                                                              |
| P | B5XUC1 | CC | Involved in the export of arginine                                                                                                                                                                         |
| P | B5XUC1 | DE | Arginine exporter protein ArgO;                                                                                                                                                                            |
| P | B5XUV2 | DR | cobalt ion transmembrane transporter activity                                                                                                                                                              |
| P | B5XVU3 | CC | H <sup>+</sup> -stimulated, highly selective, manganese uptake system (By similarity).                                                                                                                     |
| P | B5XVU3 | DE | Probable manganese transport protein mntH;                                                                                                                                                                 |
| P | B5XVZ7 | CC | Involved in the import of threonine and serine into the cell, with the concomitant import of a proton (symport system) (By similarity).                                                                    |
| P | B5XVZ7 | DE | Threonine/serine transporter TdcC;                                                                                                                                                                         |
| P | B5XZ47 | CC | Uptake of L-rhamnose across the boundary membrane with the concomitant transport of protons into the cell (symport system) (By similarity).                                                                |
| P | B5XZ47 | DE | L-rhamnose-H <sup>+</sup> transport protein;                                                                                                                                                               |
| P | B5XZ47 | DE | L-rhamnose-proton symporter;                                                                                                                                                                               |
| P | B5XZE8 | CC | One of the components of the high-affinity ATP-driven potassium transport (or KDP) system, which catalyzes the hydrolysis of ATP coupled with the exchange of hydrogen and potassium ions (By similarity). |
| P | B5XZE8 | DE | Potassium-binding and translocating subunit A;                                                                                                                                                             |
| P | B5XZE8 | DE | Potassium-translocating ATPase A chain;                                                                                                                                                                    |
| P | B5XZE8 | DE | Potassium-transporting ATPase A chain;                                                                                                                                                                     |
| P | B5XZE8 | DR | potassium-transporting ATPase activity                                                                                                                                                                     |
| P | B5XZE9 | CC | One of the components of the high-affinity ATP-driven potassium transport (or KDP) system, which catalyzes the hydrolysis of ATP coupled with the exchange of hydrogen and potassium ions (By similarity). |
| P | B5XZE9 | DE | Potassium-binding and translocating subunit B;                                                                                                                                                             |
| P | B5XZE9 | DE | Potassium-translocating ATPase B chain;                                                                                                                                                                    |
| P | B5XZE9 | DE | Potassium-transporting ATPase B chain;                                                                                                                                                                     |
| P | B5XZE9 | DR | potassium-transporting ATPase activity                                                                                                                                                                     |

|   |        |    |                                                                                                                                                                                                            |
|---|--------|----|------------------------------------------------------------------------------------------------------------------------------------------------------------------------------------------------------------|
| P | B5XZF0 | CC | One of the components of the high-affinity ATP-driven potassium transport (or KDP) system, which catalyzes the hydrolysis of ATP coupled with the exchange of hydrogen and potassium ions                  |
| P | B5XZF0 | DE | Potassium-binding and translocating subunit C;                                                                                                                                                             |
| P | B5XZF0 | DE | Potassium-translocating ATPase C chain;                                                                                                                                                                    |
| P | B5XZF0 | DE | Potassium-transporting ATPase C chain;                                                                                                                                                                     |
| P | B5XZF0 | DR | potassium-transporting ATPase activity                                                                                                                                                                     |
| P | B5XZK9 | CC | Responsible for the low-affinity transport of potassium into the cell, with the probable concomitant uptake of protons (symport system) (By similarity).                                                   |
| P | B5XZK9 | DE | Kup system potassium uptake protein;                                                                                                                                                                       |
| P | B5XZK9 | DE | Low affinity potassium transport system protein kup;                                                                                                                                                       |
| P | B5XZK9 | DR | potassium ion transmembrane transporter activity                                                                                                                                                           |
| P | B5Y1L4 | CC | Functions as antiport system and exchanges two chloride ions for 1 proton                                                                                                                                  |
| P | B5Y1L4 | CC | Proton-coupled chloride transporter                                                                                                                                                                        |
| P | B5Y1L4 | DR | voltage-gated chloride channel activity                                                                                                                                                                    |
| P | B5Y1Z8 | CC | Transport system that facilitates potassium-efflux, possibly by potassium-proton antiport (By similarity).                                                                                                 |
| P | B5Y1Z8 | DE | Glutathione-regulated potassium-efflux system protein kefC;                                                                                                                                                |
| P | B5Y1Z8 | DE | K <sup>+</sup> /H <sup>+</sup> antiporter;                                                                                                                                                                 |
| P | B9JA25 | CC | Transport of potassium into the cell (By similarity).                                                                                                                                                      |
| P | B9JA25 | DE | Probable potassium transport system protein kup;                                                                                                                                                           |
| P | B9JA25 | DR | potassium ion transmembrane transporter activity                                                                                                                                                           |
| P | B9JKQ7 | CC | One of the components of the high-affinity ATP-driven potassium transport (or KDP) system, which catalyzes the hydrolysis of ATP coupled with the exchange of hydrogen and potassium ions (By similarity). |
| P | B9JKQ7 | DE | Potassium-binding and translocating subunit A;                                                                                                                                                             |
| P | B9JKQ7 | DE | Potassium-translocating ATPase A chain;                                                                                                                                                                    |
| P | B9JKQ7 | DE | Potassium-transporting ATPase A chain;                                                                                                                                                                     |
| P | B9JKQ7 | DR | potassium-transporting ATPase activity                                                                                                                                                                     |
| P | B9JKQ9 | CC | One of the components of the high-affinity ATP-driven potassium transport (or KDP) system, which catalyzes the hydrolysis of ATP coupled with the exchange of hydrogen and potassium ions                  |
| P | B9JKQ9 | DE | Potassium-binding and translocating subunit C;                                                                                                                                                             |
| P | B9JKQ9 | DE | Potassium-translocating ATPase C chain;                                                                                                                                                                    |
| P | B9JKQ9 | DE | Potassium-transporting ATPase C chain;                                                                                                                                                                     |
| P | B9JKQ9 | DR | potassium-transporting ATPase activity                                                                                                                                                                     |
| P | B9K2I1 | CC | One of the components of the high-affinity ATP-driven potassium transport (or KDP) system, which catalyzes the hydrolysis of ATP coupled with the exchange of hydrogen and potassium ions                  |
| P | B9K2I1 | DE | Potassium-binding and translocating subunit C;                                                                                                                                                             |
| P | B9K2I1 | DE | Potassium-translocating ATPase C chain;                                                                                                                                                                    |
| P | B9K2I1 | DE | Potassium-transporting ATPase C chain;                                                                                                                                                                     |
| P | B9K2I1 | DR | potassium-transporting ATPase activity                                                                                                                                                                     |
| P | B9K2I3 | CC | One of the components of the high-affinity ATP-driven potassium transport (or KDP) system, which catalyzes the hydrolysis of ATP coupled with the exchange of hydrogen and potassium ions (By similarity). |
| P | B9K2I3 | DE | Potassium-binding and translocating subunit A;                                                                                                                                                             |
| P | B9K2I3 | DE | Potassium-translocating ATPase A chain;                                                                                                                                                                    |
| P | B9K2I3 | DE | Potassium-transporting ATPase A chain;                                                                                                                                                                     |
| P | B9K2I3 | DR | potassium-transporting ATPase activity                                                                                                                                                                     |
| P | B9K2V4 | DR | sodium:dicarboxylate symporter activity                                                                                                                                                                    |
| P | O00168 | CC | Induces a hyperpolarization-activated chloride current when expressed in <i>Xenopus</i> oocytes                                                                                                            |
| P | O00168 | DR | chloride channel activity                                                                                                                                                                                  |
| P | O00180 | CC | Weakly inward rectifying potassium channel.                                                                                                                                                                |
| P | O00180 | DE | Inward rectifying potassium channel protein TWIK-1;                                                                                                                                                        |
| P | O00180 | DE | Potassium channel KCNO1;                                                                                                                                                                                   |
| P | O00180 | DE | Potassium channel subfamily K member 1;                                                                                                                                                                    |
| P | O00180 | DR | inward rectifier potassium channel activity                                                                                                                                                                |
| P | O00299 | CC | Can insert into membranes and form chloride ion channels                                                                                                                                                   |
| P | O00299 | DE | Chloride channel ABP;                                                                                                                                                                                      |
| P | O00299 | DE | Chloride intracellular channel protein 1;                                                                                                                                                                  |
| P | O00299 | DE | Nuclear chloride ion channel 27;                                                                                                                                                                           |
| P | O00299 | DE | Regulatory nuclear chloride ion channel protein;                                                                                                                                                           |
| P | O00299 | DR | voltage-gated chloride channel activity                                                                                                                                                                    |

|   |        |    |                                                                                                                                                                                           |
|---|--------|----|-------------------------------------------------------------------------------------------------------------------------------------------------------------------------------------------|
| P | O00337 | CC | Exhibits the transport characteristics of the nucleoside transport system cit or N2 subtype (N2/cit) (selective for pyrimidine nucleosides and adenosine)                                 |
| P | O00337 | CC | Sodium-dependent and pyrimidine-selective                                                                                                                                                 |
| P | O00337 | DE | Concentrative nucleoside transporter 1;                                                                                                                                                   |
| P | O00337 | DE | Na <sup>+</sup> /nucleoside cotransporter 1;                                                                                                                                              |
| P | O00337 | DE | Na <sup>+</sup> /nucleoside cotransporter 1;                                                                                                                                              |
| P | O00337 | DE | Sodium-coupled nucleoside transporter 1;                                                                                                                                                  |
| P | O00337 | DE | Sodium-coupled nucleoside transporter 1;                                                                                                                                                  |
| P | O00337 | DE | Sodium/nucleoside cotransporter 1;                                                                                                                                                        |
| P | O00337 | DE | Sodium/nucleoside cotransporter 1;                                                                                                                                                        |
| P | O00341 | CC | Transports L-glutamate; the L-glutamate uptake is sodium- and voltage-dependent and chloride-independent                                                                                  |
| P | O00341 | CC | Transports L-glutamate; the L-glutamate uptake is sodium- and voltage-dependent and chloride-independent                                                                                  |
| P | O00341 | DE | Retinal glutamate transporter;                                                                                                                                                            |
| P | O00341 | DR | high-affinity glutamate transmembrane transporter activity                                                                                                                                |
| P | O00341 | DR | sodium:dicarboxylate symporter activity                                                                                                                                                   |
| P | O00400 | CC | Probable acetyl-CoA transporter necessary for O- acetylation of gangliosides.                                                                                                             |
| P | O00400 | DE | Acetyl-CoA transporter 1;                                                                                                                                                                 |
| P | O00400 | DR | acetyl-CoA transporter activity                                                                                                                                                           |
| P | O00476 | CC | May be involved in actively transporting phosphate into cells via Na <sup>+</sup> cotransport (By similarity).                                                                            |
| P | O00476 | CC | May be involved in actively transporting phosphate into cells via Na <sup>+</sup> cotransport (By similarity).                                                                            |
| P | O00476 | DE | Na <sup>+</sup> /PI cotransporter 4;                                                                                                                                                      |
| P | O00476 | DE | Sodium-dependent phosphate transport protein 4;                                                                                                                                           |
| P | O00476 | DE | Sodium-dependent phosphate transport protein 4;                                                                                                                                           |
| P | O00476 | DE | Sodium/phosphate cotransporter 4;                                                                                                                                                         |
| P | O00476 | DE | Sodium/phosphate cotransporter 4;                                                                                                                                                         |
| P | O00476 | DR | sodium:phosphate symporter activity                                                                                                                                                       |
| P | O00476 | DR | sodium:phosphate symporter activity                                                                                                                                                       |
| P | O00591 | CC | GABA, the major inhibitory neurotransmitter in the vertebrate brain, mediates neuronal inhibition by binding to the GABA/benzodiazepine receptor and opening an integral chloride channel |
| P | O00591 | DR | chloride channel activity                                                                                                                                                                 |
| P | O00624 | CC | May be involved in actively transporting phosphate into cells via Na <sup>+</sup> cotransport (By similarity).                                                                            |
| P | O00624 | CC | May be involved in actively transporting phosphate into cells via Na <sup>+</sup> cotransport (By similarity).                                                                            |
| P | O00624 | DE | Na <sup>+</sup> /PI cotransporter 3;                                                                                                                                                      |
| P | O00624 | DE | Sodium-dependent phosphate transport protein 3;                                                                                                                                           |
| P | O00624 | DE | Sodium-dependent phosphate transport protein 3;                                                                                                                                           |
| P | O00624 | DE | Sodium/phosphate cotransporter 3;                                                                                                                                                         |
| P | O00624 | DE | Sodium/phosphate cotransporter 3;                                                                                                                                                         |
| P | O00624 | DR | sodium:phosphate symporter activity                                                                                                                                                       |
| P | O00624 | DR | sodium:phosphate symporter activity                                                                                                                                                       |
| P | O01635 | DR | sodium channel activity                                                                                                                                                                   |
| P | O01840 | CC | Neuron-specific, H <sup>+</sup> -coupled oligopeptide transporter                                                                                                                         |
| P | O01840 | DE | Oligopeptide transporter 3;                                                                                                                                                               |
| P | O02228 | CC | Sodium ion and chloride ion dependent.                                                                                                                                                    |
| P | O04036 | CC | Sugar transporter (Potential).                                                                                                                                                            |
| P | O04036 | DE | Sugar transporter ERD6;                                                                                                                                                                   |
| P | O04036 | DE | Sugar transporter-like protein 1;                                                                                                                                                         |
| P | O04089 | CC | May play a role in the transport of zinc in the plastids                                                                                                                                  |
| P | O04089 | DE | Zinc transporter 4, chloroplastic;                                                                                                                                                        |
| P | O04089 | DR | zinc ion transmembrane transporter activity                                                                                                                                               |
| P | O04249 | DE | Hexose transporter 7;                                                                                                                                                                     |
| P | O04289 | CC | H <sup>+</sup> /sulfate cotransporter that may play a role in the regulation of sulfate assimilation                                                                                      |
| P | O04289 | DE | Sulfate transporter 3.2;                                                                                                                                                                  |
| P | O04289 | DR | secondary active sulfate transmembrane transporter activity                                                                                                                               |
| P | O04514 | DE | Oligopeptide transporter 2;                                                                                                                                                               |
| P | O04722 | CC | Low-affinity H <sup>+</sup> /sulfate cotransporter that may be involved in root-to-shoot translocation of sulfate                                                                         |
| P | O04722 | CC | Plays a central role in the regulation of sulfate assimilation.                                                                                                                           |
| P | O04722 | DE | Sulfate transporter 2.1;                                                                                                                                                                  |



|   |        |    |                                                                                                                                                                                                                                                   |
|---|--------|----|---------------------------------------------------------------------------------------------------------------------------------------------------------------------------------------------------------------------------------------------------|
| P | O04722 | DR | secondary active sulfate transmembrane transporter activity                                                                                                                                                                                       |
| P | O05703 | CC | Part of the ATP-driven transport system AdcABC for zinc                                                                                                                                                                                           |
| P | O05703 | DE | Zinc-binding lipoprotein AdcA;                                                                                                                                                                                                                    |
| P | O05870 | CC | Part of the ABC transporter complex pstSACB involved in phosphate import (By similarity).                                                                                                                                                         |
| P | O05870 | DE | Phosphate-binding protein pstS 2;                                                                                                                                                                                                                 |
| P | O05870 | DR | inorganic phosphate transmembrane transporter activity                                                                                                                                                                                            |
| P | O05962 | CC | Provides the rickettsial cell with host ATP in exchange for rickettsial ADP                                                                                                                                                                       |
| P | O05962 | CC | Provides the rickettsial cell with host ATP in exchange for rickettsial ADP                                                                                                                                                                       |
| P | O05962 | DE | ADP/ATP carrier protein 5;                                                                                                                                                                                                                        |
| P | O05962 | DE | ADP/ATP translocase 5;                                                                                                                                                                                                                            |
| P | O05962 | DE | ADP/ATP translocase 5;                                                                                                                                                                                                                            |
| P | O05962 | DR | ATP:ADP antiporter activity                                                                                                                                                                                                                       |
| P | O05962 | DR | ATP:ADP antiporter activity                                                                                                                                                                                                                       |
| P | O06411 | CC | Low-affinity inorganic phosphate transport (By similarity).                                                                                                                                                                                       |
| P | O06411 | DE | Probable low-affinity inorganic phosphate transporter;                                                                                                                                                                                            |
| P | O06411 | DR | inorganic phosphate transmembrane transporter activity                                                                                                                                                                                            |
| P | O06984 | DE | Putative sulfate transporter yvdB;                                                                                                                                                                                                                |
| P | O06984 | DR | secondary active sulfate transmembrane transporter activity                                                                                                                                                                                       |
| P | O07563 | CC | Can transport glucose, mannose, 2-deoxyglucose and methyl alpha-glucoside, but not galactose.                                                                                                                                                     |
| P | O07563 | CC | Can transport glucose, mannose, 2-deoxyglucose and methyl alpha-glucoside, but not galactose.                                                                                                                                                     |
| P | O07563 | DE | Glucose/mannose transporter glcP;                                                                                                                                                                                                                 |
| P | O07563 | DE | Glucose/mannose transporter glcP;                                                                                                                                                                                                                 |
| P | O07563 | DE | Glucose/mannose:H+ symporter;                                                                                                                                                                                                                     |
| P | O07563 | DE | Glucose/mannose:H+ symporter;                                                                                                                                                                                                                     |
| P | O08581 | CC | Weak inwardly rectifying potassium channel.                                                                                                                                                                                                       |
| P | O08581 | DE | Inward rectifying potassium channel protein TWIK-1;                                                                                                                                                                                               |
| P | O08581 | DE | Potassium channel subfamily K member 1;                                                                                                                                                                                                           |
| P | O08581 | DR | potassium channel activity                                                                                                                                                                                                                        |
| P | O13918 | CC | Involved in zinc homeostasis, where it plays a role in its accumulation in the endoplasmic reticulum/nucleus                                                                                                                                      |
| P | O13918 | DE | Zinc homeostasis factor 1;                                                                                                                                                                                                                        |
| P | O13918 | DR | zinc ion transmembrane transporter activity                                                                                                                                                                                                       |
| P | O14091 | CC | Responsible for the transport of maltose and sucrose into the cell, with the concomitant uptake of protons (symport system).                                                                                                                      |
| P | O14520 | CC | Forms a channel for water and glycerol.                                                                                                                                                                                                           |
| P | O14520 | DR | water channel activity                                                                                                                                                                                                                            |
| P | O14649 | CC | Acts as an outward rectifier when external potassium concentration is low                                                                                                                                                                         |
| P | O14649 | CC | Rectification direction results from potassium ion concentration on either side of the membrane                                                                                                                                                   |
| P | O14649 | CC | When external potassium concentration is high, current is inward.                                                                                                                                                                                 |
| P | O14649 | CC | pH-dependent, voltage-insensitive, background potassium channel protein                                                                                                                                                                           |
| P | O14649 | DE | Acid-sensitive potassium channel protein TASK-1;                                                                                                                                                                                                  |
| P | O14649 | DE | Potassium channel subfamily K member 3;                                                                                                                                                                                                           |
| P | O14649 | DE | TWIK-related acid-sensitive K+ channel 1;                                                                                                                                                                                                         |
| P | O14649 | DE | Two pore K+ channel KT3.1;                                                                                                                                                                                                                        |
| P | O14649 | DE | Two pore potassium channel KT3.1;                                                                                                                                                                                                                 |
| P | O14764 | CC | GABA, the major inhibitory neurotransmitter in the vertebrate brain, mediates neuronal inhibition by binding to the GABA/benzodiazepine receptor and opening an integral chloride channel.                                                        |
| P | O14764 | DR | chloride channel activity                                                                                                                                                                                                                         |
| P | O14863 | CC | Probably involved in zinc transport out of the cytoplasm, maybe by sequestration into an intracellular compartment.                                                                                                                               |
| P | O14863 | DE | Zinc transporter 4;                                                                                                                                                                                                                               |
| P | O14863 | DR | zinc ion transmembrane transporter activity                                                                                                                                                                                                       |
| P | O14983 | CC | Contributes to calcium sequestration involved in muscular excitation/contraction. This magnesium-dependent enzyme catalyzes the hydrolysis of ATP coupled with the translocation of calcium from the cytosol to the sarcoplasmic reticulum lumen. |
| P | O14983 | CC | with the translocation of calcium from the cytosol to the sarcoplasmic reticulum lumen.                                                                                                                                                           |
| P | O14983 | DE | Calcium pump 1;                                                                                                                                                                                                                                   |
| P | O14983 | DE | Calcium-transporting ATPase sarcoplasmic reticulum type, fast twitch skeletal muscle isoform;                                                                                                                                                     |
| P | O14983 | DE | Endoplasmic reticulum class 1/2 Ca2+ ATPase;                                                                                                                                                                                                      |
| P | O14983 | DE | SR Ca2+-ATPase 1;                                                                                                                                                                                                                                 |

|   |        |    |                                                                                                                                                              |
|---|--------|----|--------------------------------------------------------------------------------------------------------------------------------------------------------------|
| P | O14983 | DE | Sarcoplasmic/endoplasmic reticulum calcium ATPase 1;                                                                                                         |
| P | O14983 | DR | calcium-transporting ATPase activity                                                                                                                         |
| P | O15118 | DR | sterol transporter activity                                                                                                                                  |
| P | O15247 | CC | Can insert into membranes and form chloride ion channels                                                                                                     |
| P | O15247 | DE | Chloride intracellular channel protein 2;                                                                                                                    |
| P | O15247 | DR | voltage-gated chloride channel activity                                                                                                                      |
| P | O15374 | CC | Proton-linked monocarboxylate transporter                                                                                                                    |
| P | O15374 | DE | Monocarboxylate transporter 4;                                                                                                                               |
| P | O15374 | DE | Monocarboxylate transporter 5;                                                                                                                               |
| P | O15375 | CC | Proton-linked monocarboxylate transporter                                                                                                                    |
| P | O15375 | DE | Monocarboxylate transporter 5;                                                                                                                               |
| P | O15375 | DE | Monocarboxylate transporter 6;                                                                                                                               |
| P | O15375 | DR | secondary active monocarboxylate transmembrane transporter activity                                                                                          |
| P | O15403 | CC | Proton-linked monocarboxylate transporter                                                                                                                    |
| P | O15403 | DE | Monocarboxylate transporter 6;                                                                                                                               |
| P | O15403 | DE | Monocarboxylate transporter 7;                                                                                                                               |
| P | O15427 | CC | Proton-linked monocarboxylate transporter                                                                                                                    |
| P | O15427 | DE | Monocarboxylate transporter 3;                                                                                                                               |
| P | O15427 | DE | Monocarboxylate transporter 4;                                                                                                                               |
| P | O15427 | DR | secondary active monocarboxylate transmembrane transporter activity                                                                                          |
| P | O15431 | CC | High-affinity, saturable copper transporter involved in dietary copper uptake.                                                                               |
| P | O15431 | DE | Copper transporter 1;                                                                                                                                        |
| P | O15431 | DE | High affinity copper uptake protein 1;                                                                                                                       |
| P | O15431 | DR | copper ion transmembrane transporter activity                                                                                                                |
| P | O15432 | CC | Involved in low-affinity copper uptake (Potential).                                                                                                          |
| P | O15432 | DE | Copper transporter 2;                                                                                                                                        |
| P | O15432 | DE | Probable low affinity copper uptake protein 2;                                                                                                               |
| P | O15432 | DR | copper ion transmembrane transporter activity                                                                                                                |
| P | O15554 | CC | forms a voltage-independent potassium channel that is activated by intracellular calcium                                                                     |
| P | O16452 | DE | Na <sup>+</sup> -H <sup>+</sup> exchanger protein 3;                                                                                                         |
| P | O16452 | DE | Probable Na <sup>+</sup> /H <sup>+</sup> antiporter nhx-3;                                                                                                   |
| P | O16452 | DR | sodium:hydrogen antiporter activity                                                                                                                          |
| P | O17444 | CC | Involved in acetylcholine transport into synaptic vesicles.                                                                                                  |
| P | O17444 | DE | Vesicular acetylcholine transporter;                                                                                                                         |
| P | O18276 | CC | GABA, an inhibitory neurotransmitter, mediates neuronal inhibition by binding to the GABA receptor and opening an integral chloride channel (By similarity). |
| P | O18276 | DR | chloride channel activity                                                                                                                                    |
| P | O22218 | CC | This magnesium-dependent enzyme catalyzes the hydrolysis of ATP coupled with the translocation of calcium from the cytosol into small vacuoles.              |
| P | O22218 | DE | Ca <sup>2+</sup> -ATPase isoform 4;                                                                                                                          |
| P | O22218 | DE | Calcium-transporting ATPase 4, plasma membrane-type;                                                                                                         |
| P | O22218 | DR | calcium-transporting ATPase activity                                                                                                                         |
| P | O22397 | CC | High-affinity potassium transporter that could play a major role in the uptake of potassium from the rhizosphere                                             |
| P | O22397 | CC | may act as a low-affinity potassium transporter under high potassium concentrations                                                                          |
| P | O22397 | DE | Potassium transporter 1;                                                                                                                                     |
| P | O22397 | DR | potassium ion transmembrane transporter activity                                                                                                             |
| P | O22588 | CC | Aquaporins facilitate the transport of water and small neutral solutes across cell membranes (By similarity).                                                |
| P | O22881 | CC | Could mediate the potassium-dependent cell expansion in growing tissues.                                                                                     |
| P | O22881 | CC | Low-affinity potassium transporter                                                                                                                           |
| P | O22881 | DE | Potassium transporter 2;                                                                                                                                     |
| P | O22881 | DR | potassium ion transmembrane transporter activity                                                                                                             |
| P | O22920 | CC | May operate as a K <sup>+</sup> /H <sup>+</sup> symporter.                                                                                                   |
| P | O22920 | DE | Cation/H <sup>+</sup> symporter 13;                                                                                                                          |
| P | O22920 | DE | Protein CATION/H <sup>+</sup> EXCHANGER 13;                                                                                                                  |
| P | O23039 | CC | Probably mediates zinc uptake from the rhizosphere (By similarity).                                                                                          |
| P | O23039 | DE | Zinc transporter 5;                                                                                                                                          |
| P | O23039 | DR | zinc ion transmembrane transporter activity                                                                                                                  |
| P | O23087 | CC | This magnesium-dependent enzyme catalyzes the hydrolysis of ATP coupled with the translocation of calcium from the cytosol to an endomembrane compartment    |
| P | O23087 | DE | Calcium-transporting ATPase 2, endoplasmic reticulum-type;                                                                                                   |
| P | O23087 | DR | calcium-transporting ATPase activity                                                                                                                         |
| P | O25788 | CC | Intake of glucose and galactose (Potential).                                                                                                                 |
| P | O25788 | DE | Putative glucose/galactose transporter;                                                                                                                      |

|   |        |    |                                                                                                                                      |
|---|--------|----|--------------------------------------------------------------------------------------------------------------------------------------|
| P | O25788 | DE | Putative glucose/galactose transporter;                                                                                              |
| P | O25788 | DR | galactose transmembrane transporter activity                                                                                         |
| P | O25788 | DR | glucose transmembrane transporter activity                                                                                           |
| P | O25797 | CC | The physiological role may be the reduction of the intracellular concentration of toxic sugars or sugar metabolites (By similarity). |
| P | O25797 | DE | Probable sugar efflux transporter;                                                                                                   |
| P | O25901 | CC | Mediates influx of magnesium ions                                                                                                    |
| P | O25901 | CC | Plays a key role in the adaptation to the low magnesium conditions predominant in the gastric environment.                           |
| P | O25901 | DE | Magnesium transport protein CorA;                                                                                                    |
| P | O25901 | DR | cobalt ion transmembrane transporter activity                                                                                        |
| P | O25901 | DR | magnesium ion transmembrane transporter activity                                                                                     |
| P | O26076 | CC | Na <sup>+</sup> /H <sup>+</sup> antiporter that excludes sodium in exchange for external protons (By similarity).                    |
| P | O26076 | DE | Na <sup>+</sup> /H <sup>+</sup> antiporter nhaA;                                                                                     |
| P | O26076 | DE | Sodium/proton antiporter nhaA;                                                                                                       |
| P | O26096 | CC | Part of the ABC transporter complex MetNIQ involved in methionine import                                                             |
| P | O26096 | DE | Methionine import ATP-binding protein MetN;                                                                                          |
| P | O26234 | DR | cobalt ion transmembrane transporter activity                                                                                        |
| P | O27764 | CC | Part of the ABC transporter complex PstSACB involved in phosphate import                                                             |
| P | O27764 | DE | ABC phosphate transporter;                                                                                                           |
| P | O27764 | DE | Phosphate import ATP-binding protein PstB;                                                                                           |
| P | O27764 | DE | Phosphate-transporting ATPase;                                                                                                       |
| P | O27764 | DR | inorganic phosphate transmembrane transporter activity                                                                               |
| P | O27764 | DR | phosphate transmembrane-transporting ATPase activity                                                                                 |
| P | O28846 | CC | Channel that permits osmotically driven movement of water in both directions (By similarity).                                        |
| P | O28912 | CC | Part of the ABC transporter complex PstSACB involved in phosphate import                                                             |
| P | O28912 | DE | ABC phosphate transporter;                                                                                                           |
| P | O28912 | DE | Phosphate import ATP-binding protein PstB;                                                                                           |
| P | O28912 | DE | Phosphate-transporting ATPase;                                                                                                       |
| P | O28912 | DR | inorganic phosphate transmembrane transporter activity                                                                               |
| P | O28912 | DR | phosphate transmembrane-transporting ATPase activity                                                                                 |
| P | O29529 | DR | cobalt ion transmembrane transporter activity                                                                                        |
| P | O30085 | CC | Probably involved in copper export.                                                                                                  |
| P | O30085 | DE | Probable copper-exporting P-type ATPase B;                                                                                           |
| P | O30085 | DR | copper-exporting ATPase activity                                                                                                     |
| P | O30142 | CC | Binds tungstate and molybdate.                                                                                                       |
| P | O30142 | CC | Part of the ABC transporter complex wtpABC involved in molybdate/tungstate import                                                    |
| P | O30142 | DE | Molybdate/tungstate-binding protein wtpA;                                                                                            |
| P | O30143 | CC | Part of the ABC transporter complex wtpABC involved in molybdate/tungstate import                                                    |
| P | O30143 | DE | Molybdate/tungstate transport system permease protein wtpB;                                                                          |
| P | O30144 | CC | Part of the ABC transporter complex wtpABC involved in molybdate/tungstate import                                                    |
| P | O30144 | DE | Molybdate/tungstate import ATP-binding protein WtpC;                                                                                 |
| P | O30417 | CC | Involved in glutamate-dependent acid resistance                                                                                      |
| P | O30417 | CC | may be involved in import of glutamate and glutamate-gamma- aminobutyrate (GABA)                                                     |
| P | O30417 | DE | Glutamate/gamma-aminobutyrate antiporter;                                                                                            |
| P | O30499 | CC | Low-affinity inorganic phosphate transport (Probable).                                                                               |
| P | O30499 | DE | Probable low-affinity inorganic phosphate transporter;                                                                               |
| P | O30499 | DR | inorganic phosphate transmembrane transporter activity                                                                               |
| P | O30506 | CC | Part of the arginine-inducible binding-protein-dependent transport system for arginine and ornithine                                 |
| P | O30506 | CC | Part of the arginine-inducible binding-protein-dependent transport system for arginine and ornithine                                 |
| P | O30506 | DE | Arginine/ornithine transport ATP-binding protein AotP;                                                                               |
| P | O30506 | DE | Arginine/ornithine transport ATP-binding protein AotP;                                                                               |
| P | O30510 | DE | Putative bile salt transporter;                                                                                                      |
| P | O30513 | CC | Probable uptake of benzoate.                                                                                                         |
| P | O30513 | DE | Benzoate transport protein;                                                                                                          |
| P | O30832 | DE | Sorbitol/mannitol transport inner membrane protein;                                                                                  |
| P | O30833 | DE | Sorbitol/mannitol transport inner membrane protein;                                                                                  |
| P | O31137 | DE | Tetracycline-resistance determinant tetV;                                                                                            |
| P | O31199 | DE | Inducible histidine transporter;                                                                                                     |
| P | O31307 | DE | Oligopeptide ABC transporter, permease protein (OppB-1);                                                                             |
| P | O31307 | DE | Oligopeptide permease homolog B;                                                                                                     |
| P | O31309 | DE | Oligopeptide ABC transporter, ATP-binding protein (OppD);                                                                            |

|   |        |    |                                                                                                                                                                                                            |
|---|--------|----|------------------------------------------------------------------------------------------------------------------------------------------------------------------------------------------------------------|
| P | O31309 | DE | Oligopeptide permease homolog D;                                                                                                                                                                           |
| P | O31310 | DE | Oligopeptide ABC transporter, ATP-binding protein (OppF);                                                                                                                                                  |
| P | O31310 | DE | Oligopeptide permease homolog F;                                                                                                                                                                           |
| P | O31315 | DE | Oligopeptide ABC transporter, periplasmic oligopeptide-binding protein (OppA/Ynf).                                                                                                                         |
| P | O31567 | CC | Part of the ABC transporter complex yfiYZ/yfhA/yusV involved in import of the iron-hydroxamate siderophores schizokinen, arthrobactin and corprogen                                                        |
| P | O31567 | DR | iron ion transmembrane transporter activity                                                                                                                                                                |
| P | O31568 | CC | Part of the ABC transporter complex yfiYZ/yfhA/yusV involved in import of the iron-hydroxamate siderophores schizokinen, arthrobactin and corprogen (Probable)                                             |
| P | O31658 | CC | Integral membrane subunit of the KtrCD potassium uptake transporter                                                                                                                                        |
| P | O31658 | CC | The 2 major potassium transporter complexes KtrAB and KtrCD confer resistance to both suddenly imposed and prolonged osmotic stress.                                                                       |
| P | O31658 | DE | K+-uptake protein ktrD;                                                                                                                                                                                    |
| P | O31658 | DE | Ktr system potassium uptake protein D;                                                                                                                                                                     |
| P | O32081 | CC | Integral membrane subunit of the KtrAB potassium uptake transporter                                                                                                                                        |
| P | O32081 | CC | The 2 major potassium transporter complexes KtrAB and KtrCD confer resistance to both suddenly imposed and prolonged osmotic stress.                                                                       |
| P | O32081 | DE | K+-uptake protein ktrB;                                                                                                                                                                                    |
| P | O32081 | DE | Ktr system potassium uptake protein B;                                                                                                                                                                     |
| P | O32115 | DR | nucleoside:sodium symporter activity                                                                                                                                                                       |
| P | O32204 | CC | Catalyzes an electroneutral exchange between arginine and ornithine to allow high-efficiency energy conversion in the arginine deiminase pathway (By similarity)                                           |
| P | O32204 | CC | Catalyzes an electroneutral exchange between arginine and ornithine to allow high-efficiency energy conversion in the arginine deiminase pathway (By similarity)                                           |
| P | O32204 | DE | Putative arginine/ornithine antiporter;                                                                                                                                                                    |
| P | O32204 | DE | Putative arginine/ornithine antiporter;                                                                                                                                                                    |
| P | O32209 | CC | could be part of the binding-protein-dependent transport system for molybdenum; probably responsible for the translocation of the substrate across the membrane (By similarity).                           |
| P | O32209 | DE | Putative molybdenum transport system permease protein yvgM;                                                                                                                                                |
| P | O32212 | CC | Transporter involved in the efflux of sodium, potassium, lithium and rubidium.                                                                                                                             |
| P | O32212 | DE | Sodium, potassium, lithium and rubidium/H+ antiporter;                                                                                                                                                     |
| P | O32219 | CC | Couples the hydrolysis of ATP with the transport of cadmium, zinc and cobalt out of the cell                                                                                                               |
| P | O32219 | CC | Couples the hydrolysis of ATP with the transport of cadmium, zinc and cobalt out of the cell                                                                                                               |
| P | O32219 | DE | Cadmium, zinc and cobalt-transporting ATPase;                                                                                                                                                              |
| P | O32219 | DE | Cadmium, zinc and cobalt-transporting ATPase;                                                                                                                                                              |
| P | O32219 | DR | cadmium-exporting ATPase activity                                                                                                                                                                          |
| P | O32219 | DR | zinc-exporting ATPase activity                                                                                                                                                                             |
| P | O32220 | CC | Involved in copper export.                                                                                                                                                                                 |
| P | O32220 | DE | Copper-exporting P-type ATPase A;                                                                                                                                                                          |
| P | O32220 | DR | copper-exporting ATPase activity                                                                                                                                                                           |
| P | O32243 | CC | Member of a high affinity multicomponent binding- protein-dependent transport system for glycine betaine, carnitine, and choline.                                                                          |
| P | O32243 | CC | Member of a high affinity multicomponent binding- protein-dependent transport system for glycine betaine, carnitine, and choline.                                                                          |
| P | O32243 | DE | Glycine betaine/carnitine/choline-binding protein;                                                                                                                                                         |
| P | O32243 | DE | Glycine betaine/carnitine/choline-binding protein;                                                                                                                                                         |
| P | O32327 | CC | One of the components of the high-affinity ATP-driven potassium transport (or KDP) system, which catalyzes the hydrolysis of ATP coupled with the exchange of hydrogen and potassium ions (By similarity). |
| P | O32327 | DE | Potassium-binding and translocating subunit A;                                                                                                                                                             |
| P | O32327 | DE | Potassium-translocating ATPase A chain;                                                                                                                                                                    |
| P | O32327 | DE | Potassium-transporting ATPase A chain;                                                                                                                                                                     |
| P | O32327 | DR | potassium-transporting ATPase activity                                                                                                                                                                     |
| P | O32328 | CC | One of the components of the high-affinity ATP-driven potassium transport (or KDP) system, which catalyzes the hydrolysis of ATP coupled with the exchange of hydrogen and potassium ions.                 |
| P | O32328 | DE | Potassium-binding and translocating subunit B;                                                                                                                                                             |
| P | O32328 | DE | Potassium-translocating ATPase B chain;                                                                                                                                                                    |
| P | O32328 | DE | Potassium-transporting ATPase B chain;                                                                                                                                                                     |
| P | O32328 | DR | potassium-transporting ATPase activity                                                                                                                                                                     |
| P | O33704 | DE | Zinc ABC transporter, permease protein;                                                                                                                                                                    |
| P | O34348 | DR | iron ion transmembrane transporter activity                                                                                                                                                                |

|   |        |    |                                                                                                                                                                                                                     |
|---|--------|----|---------------------------------------------------------------------------------------------------------------------------------------------------------------------------------------------------------------------|
| P | O34436 | CC | Low-affinity inorganic phosphate transport (By similarity).                                                                                                                                                         |
| P | O34436 | DE | Probable low-affinity inorganic phosphate transporter;                                                                                                                                                              |
| P | O34436 | DR | inorganic phosphate transmembrane transporter activity                                                                                                                                                              |
| P | O34442 | DE | Magnesium transporter mgtE;                                                                                                                                                                                         |
| P | O34734 | DR | inorganic phosphate transmembrane transporter activity                                                                                                                                                              |
| P | O34742 | CC | Involved in a high affinity multicomponent binding- protein-dependent transport system for glycine betaine, carnitine and choline; probably responsible for the translocation of the substrate across the membrane. |
| P | O34742 | CC | Involved in a high affinity multicomponent binding- protein-dependent transport system for glycine betaine, carnitine and choline; probably responsible for the translocation of the substrate across the membrane. |
| P | O34742 | DE | Glycine betaine/carnitine/choline transport system permease protein opuCD;                                                                                                                                          |
| P | O34742 | DE | Glycine betaine/carnitine/choline transport system permease protein opuCD;                                                                                                                                          |
| P | O34878 | CC | Involved in a high affinity multicomponent binding- protein-dependent transport system for glycine betaine, carnitine and choline; probably responsible for the translocation of the substrate across the membrane. |
| P | O34878 | CC | Involved in a high affinity multicomponent binding- protein-dependent transport system for glycine betaine, carnitine and choline; probably responsible for the translocation of the substrate across the membrane. |
| P | O34878 | DE | Glycine betaine/carnitine/choline transport system permease protein opuCB;                                                                                                                                          |
| P | O34878 | DE | Glycine betaine/carnitine/choline transport system permease protein opuCB;                                                                                                                                          |
| P | O34992 | CC | Involved in a high affinity multicomponent binding- protein-dependent transport system for glycine betaine, carnitine and choline; probably responsible for energy coupling to the transport system.                |
| P | O34992 | CC | Involved in a high affinity multicomponent binding- protein-dependent transport system for glycine betaine, carnitine and choline; probably responsible for energy coupling to the transport system.                |
| P | O34992 | DE | Glycine betaine/carnitine/choline transport ATP-binding protein OpuCA;                                                                                                                                              |
| P | O34992 | DE | Glycine betaine/carnitine/choline transport ATP-binding protein OpuCA;                                                                                                                                              |
| P | O35055 | CC | AT LEAST ONE Na <sup>+</sup> SEEMS TO BIND TO THE TRANSPORTER BEFORE THE SUBSTRATE.                                                                                                                                 |
| P | O35055 | CC | IT MAY HAVE A SODIUM:SUBSTRATE STOICHIOMETRY OF 3:1                                                                                                                                                                 |
| P | O35055 | CC | MAY MEDiate ELECTROGENIC, SODIUM-DEPENDENT TRANSPORT OF MOST KREBS CYCLE INTERMEDIATES, INCLUDING CITRATE, SUCCINATE, ALPHA-KETOGLUTARATE, AND OXALOACETATE                                                         |
| P | O35055 | CC | MAY MEDiate ELECTROGENIC, SODIUM-DEPENDENT TRANSPORT OF MOST KREBS CYCLE INTERMEDIATES, INCLUDING CITRATE, SUCCINATE, ALPHA-KETOGLUTARATE, AND OXALOACETATE                                                         |
| P | O35055 | CC | TRANSPORT OF CITRATE WAS PH SENSITIVE                                                                                                                                                                               |
| P | O35055 | DE | Sodium-dependent dicarboxylate transporter;                                                                                                                                                                         |
| P | O35055 | DE | Sodium-dependent dicarboxylate transporter;                                                                                                                                                                         |
| P | O35055 | DE | Sodium-dicarboxylate cotransporter SDCT1;                                                                                                                                                                           |
| P | O35055 | DE | Solute carrier family 13 (Sodium-dependent dicarboxylate transporter), member 2, isoform CRA_a;                                                                                                                     |
| P | O35111 | CC | Acts as an outward rectifier when external potassium concentration is low                                                                                                                                           |
| P | O35111 | CC | Rectification direction results from potassium ion concentration on either side of the membrane                                                                                                                     |
| P | O35111 | CC | When external potassium concentration is high, current is inward (By similarity).                                                                                                                                   |
| P | O35111 | CC | pH-dependent, voltage-insensitive, background potassium channel protein                                                                                                                                             |
| P | O35111 | DE | Acid-sensitive potassium channel protein TASK-1;                                                                                                                                                                    |
| P | O35111 | DE | Cardiac two pore background K <sup>+</sup> channel;                                                                                                                                                                 |
| P | O35111 | DE | Potassium channel subfamily K member 3;                                                                                                                                                                             |
| P | O35111 | DE | TWIK-related acid-sensitive K <sup>+</sup> channel 1;                                                                                                                                                               |
| P | O35111 | DE | Two pore K <sup>+</sup> channel KT3.1;                                                                                                                                                                              |
| P | O35111 | DE | Two pore potassium channel KT3.1;                                                                                                                                                                                   |
| P | O35173 | CC | Potassium channel subunit                                                                                                                                                                                           |
| P | O35173 | DE | Delayed-rectifier K <sup>+</sup> channel alpha subunit 1;                                                                                                                                                           |
| P | O35173 | DE | Potassium voltage-gated channel subfamily S member 1;                                                                                                                                                               |
| P | O35173 | DE | Voltage-gated potassium channel subunit Kv9.1;                                                                                                                                                                      |
| P | O35173 | DR | delayed rectifier potassium channel activity                                                                                                                                                                        |
| P | O35173 | DR | potassium channel regulator activity                                                                                                                                                                                |
| P | O35174 | CC | Potassium channel subunit                                                                                                                                                                                           |
| P | O35174 | DE | Delayed-rectifier K <sup>+</sup> channel alpha subunit 2;                                                                                                                                                           |
| P | O35174 | DE | Potassium voltage-gated channel subfamily S member 2;                                                                                                                                                               |
| P | O35174 | DE | Voltage-gated potassium channel subunit Kv9.2;                                                                                                                                                                      |

|   |        |    |                                                                                                                                                                                                                                                                                                                                                              |
|---|--------|----|--------------------------------------------------------------------------------------------------------------------------------------------------------------------------------------------------------------------------------------------------------------------------------------------------------------------------------------------------------------|
| P | O35174 | DR | voltage-gated potassium channel activity                                                                                                                                                                                                                                                                                                                     |
| P | O35308 | CC | Proton-linked monocarboxylate transporter                                                                                                                                                                                                                                                                                                                    |
| P | O35308 | DE | Monocarboxylate transporter 3;                                                                                                                                                                                                                                                                                                                               |
| P | O35308 | DE | Proton-coupled monocarboxylate transporter 3;                                                                                                                                                                                                                                                                                                                |
| P | O35308 | DR | secondary active monocarboxylate transmembrane transporter activity                                                                                                                                                                                                                                                                                          |
| P | O35316 | CC | Required for the uptake of taurine                                                                                                                                                                                                                                                                                                                           |
| P | O35316 | CC | Transports both taurine and beta-alanine which requires sodium ions                                                                                                                                                                                                                                                                                          |
| P | O35316 | CC | Transports both taurine and beta-alanine which requires sodium ions                                                                                                                                                                                                                                                                                          |
| P | O35316 | DE | Sodium- and chloride-dependent taurine transporter;                                                                                                                                                                                                                                                                                                          |
| P | O35316 | DE | Sodium- and chloride-dependent taurine transporter;                                                                                                                                                                                                                                                                                                          |
| P | O35316 | DR | neurotransmitter:sodium symporter activity                                                                                                                                                                                                                                                                                                                   |
| P | O35454 | CC | Chloride transport protein, initially identified as voltage-gated chloride channel                                                                                                                                                                                                                                                                           |
| P | O35454 | DE | Chloride channel protein 6;                                                                                                                                                                                                                                                                                                                                  |
| P | O35454 | DE | Chloride transport protein 6;                                                                                                                                                                                                                                                                                                                                |
| P | O35454 | DR | voltage-gated chloride channel activity                                                                                                                                                                                                                                                                                                                      |
| P | O35544 | CC | Seems to act as a symport by cotransporting sodium (By similarity).                                                                                                                                                                                                                                                                                          |
| P | O35544 | CC | Transports L-glutamate and also L- and D-aspartate                                                                                                                                                                                                                                                                                                           |
| P | O35544 | DE | High-affinity neuronal glutamate transporter;                                                                                                                                                                                                                                                                                                                |
| P | O35544 | DE | Sodium-dependent glutamate/aspartate transporter;                                                                                                                                                                                                                                                                                                            |
| P | O35544 | DE | Sodium-dependent glutamate/aspartate transporter;                                                                                                                                                                                                                                                                                                            |
| P | O35544 | DE | Sodium-dependent glutamate/aspartate transporter;                                                                                                                                                                                                                                                                                                            |
| P | O35544 | DR | L-glutamate transmembrane transporter activity                                                                                                                                                                                                                                                                                                               |
| P | O35544 | DR | sodium:dicarboxylate symporter activity                                                                                                                                                                                                                                                                                                                      |
| P | O35600 | DR | phospholipid-translocating ATPase activity                                                                                                                                                                                                                                                                                                                   |
| P | O35633 | CC | Involved in the uptake of GABA and glycine into the synaptic vesicles.                                                                                                                                                                                                                                                                                       |
| P | O35633 | CC | Involved in the uptake of GABA and glycine into the synaptic vesicles.                                                                                                                                                                                                                                                                                       |
| P | O35633 | DE | GABA and glycine transporter;                                                                                                                                                                                                                                                                                                                                |
| P | O35633 | DE | GABA and glycine transporter;                                                                                                                                                                                                                                                                                                                                |
| P | O35633 | DE | Vesicular GABA transporter;                                                                                                                                                                                                                                                                                                                                  |
| P | O35633 | DR | gamma-aminobutyric acid:hydrogen symporter activity                                                                                                                                                                                                                                                                                                          |
| P | O35633 | DR | glycine transmembrane transporter activity                                                                                                                                                                                                                                                                                                                   |
| P | O35874 | CC | Exhibits sodium dependence (By similarity).                                                                                                                                                                                                                                                                                                                  |
| P | O35874 | DR | sodium:dicarboxylate symporter activity                                                                                                                                                                                                                                                                                                                      |
| P | O35956 | CC | Mediates the sodium-independent uptake of 2,3-dimercapto-1-propanesulfonic acid (DMPS), 9-(2-phosphorylmethoxyethyl) guanine (PMEG), 9-(2-phosphorylmethoxyethyl) diaminopurine (PMEDAP), ochratoxin (OTA), acyclovir (ACV), 3'-azido-3'-deoxythymidine (AZT), cimetidine (CMD) and edaravone sulfate                                                        |
| P | O35956 | CC | Mediates the sodium-independent uptake of p-aminonippurate (PAH), cidofovir, adefovir, 2,4-dichloro-phenoxyacetate (2,4-D), hippurate (HA), indoleacetate (IA), indoxyl sulfate (IS) and 3-carboxy-4-methyl-5-propyl-2-furanpropionate (CMPF)                                                                                                                |
| P | O35956 | DR | sodium-independent organic anion transmembrane transporter activity                                                                                                                                                                                                                                                                                          |
| P | O43315 | DR | water channel activity                                                                                                                                                                                                                                                                                                                                       |
| P | O43511 | CC | Sodium-independent transporter of chloride and iodide.                                                                                                                                                                                                                                                                                                       |
| P | O43511 | DE | Sodium-independent chloride/iodide transporter;                                                                                                                                                                                                                                                                                                              |
| P | O43511 | DR | chloride transmembrane transporter activity                                                                                                                                                                                                                                                                                                                  |
| P | O43525 | CC | Associates with KCNQ2 or KCNQ5 to form a potassium channel with essentially identical properties to the channel underlying the native M-current, a slowly activating and deactivating potassium conductance which plays a critical role in determining the subthreshold electrical excitability of neurons as well as the responsiveness to synaptic inputs. |
| P | O43525 | DE | Potassium channel subunit alpha KvLQT3;                                                                                                                                                                                                                                                                                                                      |
| P | O43525 | DE | Potassium voltage-gated channel subfamily KQT member 3;                                                                                                                                                                                                                                                                                                      |
| P | O43525 | DE | Voltage-gated potassium channel subunit Kv7.3;                                                                                                                                                                                                                                                                                                               |
| P | O43525 | DR | voltage-gated potassium channel activity                                                                                                                                                                                                                                                                                                                     |
| P | O43526 | CC | Associates with KCNQ3 to form a potassium channel with essentially identical properties to the channel underlying the native M-current, a slowly activating and deactivating potassium conductance which plays a critical role in determining the subthreshold electrical excitability of neurons as well as the responsiveness to synaptic inputs           |
| P | O43526 | DE | Neuroblastoma-specific potassium channel subunit alpha KvLQT2;                                                                                                                                                                                                                                                                                               |
| P | O43526 | DE | Potassium voltage-gated channel subfamily KQT member 2;                                                                                                                                                                                                                                                                                                      |
| P | O43526 | DE | Voltage-gated potassium channel subunit Kv7.2;                                                                                                                                                                                                                                                                                                               |
| P | O43526 | DR | voltage-gated potassium channel activity                                                                                                                                                                                                                                                                                                                     |
| P | O43681 | DE | Arsenite-stimulated ATPase;                                                                                                                                                                                                                                                                                                                                  |
| P | O43681 | DR | arsenite transmembrane transporter activity                                                                                                                                                                                                                                                                                                                  |
| P | O43772 | DE | Carnitine/acylcarnitine translocase;                                                                                                                                                                                                                                                                                                                         |

|   |        |    |                                                                                                                                                     |
|---|--------|----|-----------------------------------------------------------------------------------------------------------------------------------------------------|
| P | O43772 | DE | Mitochondrial carnitine/acylcarnitine carrier protein;                                                                                              |
| P | O43772 | DR | acyl carnitine transporter activity                                                                                                                 |
| P | O43868 | CC | Exhibits the transport characteristics of the nucleoside transport system cif or N1 subtype (N1/cif) (selective for purine nucleosides and uridine) |
| P | O43868 | CC | Sodium-dependent and purine-selective transporter                                                                                                   |
| P | O43868 | DE | Concentrative nucleoside transporter 2;                                                                                                             |
| P | O43868 | DE | Na <sup>+</sup> /nucleoside cotransporter 2;                                                                                                        |
| P | O43868 | DE | Na <sup>+</sup> /nucleoside cotransporter 2;                                                                                                        |
| P | O43868 | DE | Sodium-coupled nucleoside transporter 2;                                                                                                            |
| P | O43868 | DE | Sodium-coupled nucleoside transporter 2;                                                                                                            |
| P | O43868 | DE | Sodium/nucleoside cotransporter 2;                                                                                                                  |
| P | O43868 | DE | Sodium/nucleoside cotransporter 2;                                                                                                                  |
| P | O43868 | DE | Sodium/purine nucleoside co-transporter;                                                                                                            |
| P | O43868 | DR | nucleoside:sodium symporter activity                                                                                                                |
| P | O43868 | DR | nucleoside:sodium symporter activity                                                                                                                |
| P | O45166 | DE | Folate-like transporter 2;                                                                                                                          |
| P | O45166 | DR | reduced folate carrier activity                                                                                                                     |
| P | O45215 | DE | Calcium ATPase;                                                                                                                                     |
| P | O45215 | DR | calcium-transporting ATPase activity                                                                                                                |
| P | O48639 | CC | High-affinity transporter for external inorganic phosphate (By similarity).                                                                         |
| P | O48639 | DE | Probable inorganic phosphate transporter 1-3;                                                                                                       |
| P | O48639 | DR | inorganic phosphate transmembrane transporter activity                                                                                              |
| P | O49423 | CC | Putative potassium transporter.                                                                                                                     |
| P | O49423 | DE | Potassium transporter 9;                                                                                                                            |
| P | O49423 | DR | potassium ion transmembrane transporter activity                                                                                                    |
| P | O50181 | DE | Arginine and ornithine binding protein;                                                                                                             |
| P | O50181 | DE | Arginine and ornithine binding protein;                                                                                                             |
| P | O50181 | DE | Arginine/ornithine binding protein AotJ;                                                                                                            |
| P | O50181 | DE | Arginine/ornithine binding protein AotJ;                                                                                                            |
| P | O50183 | DE | Arginine/ornithine transport protein AotM;                                                                                                          |
| P | O50183 | DE | Arginine/ornithine transport protein AotM;                                                                                                          |
| P | O50649 | DR | neurotransmitter:sodium symporter activity                                                                                                          |
| P | O50927 | DE | Oligopeptide ABC transporter, periplasmic oligopeptide-binding protein (OppA-2).                                                                    |
| P | O51236 | CC | Part of the ABC transporter complex PstSACB involved in phosphate import                                                                            |
| P | O51236 | DE | ABC phosphate transporter;                                                                                                                          |
| P | O51236 | DE | Phosphate import ATP-binding protein PstB;                                                                                                          |
| P | O51236 | DE | Phosphate-transporting ATPase;                                                                                                                      |
| P | O51236 | DR | inorganic phosphate transmembrane transporter activity                                                                                              |
| P | O51236 | DR | phosphate transmembrane-transporting ATPase activity                                                                                                |
| P | O51307 | DE | Oligopeptide ABC transporter, periplasmic oligopeptide-binding protein (OppA-2).                                                                    |
| P | O51308 | DE | Oligopeptide ABC transporter, periplasmic oligopeptide-binding protein (OppA-2).                                                                    |
| P | O51310 | DE | Oligopeptide ABC transporter, permease protein (OppC-1);                                                                                            |
| P | O51587 | CC | Part of the ABC transporter complex PstABCD involved in spermidine/putrescine import                                                                |
| P | O51587 | CC | Part of the ABC transporter complex PstABCD involved in spermidine/putrescine import                                                                |
| P | O51587 | DE | Spermidine/putrescine import ATP-binding protein PotA;                                                                                              |
| P | O51587 | DE | Spermidine/putrescine import ATP-binding protein PotA;                                                                                              |
| P | O51923 | DE | Trehalose/maltose binding protein;                                                                                                                  |
| P | O51923 | DE | Trehalose/maltose binding protein;                                                                                                                  |
| P | O51925 | DE | Trehalose/maltose transport inner membrane protein;                                                                                                 |
| P | O51925 | DE | Trehalose/maltose transport inner membrane protein;                                                                                                 |
| P | O52717 | DE | Ribitol transporter;                                                                                                                                |
| P | O53832 | CC | Part of the ABC transporter complex PstSACB involved in phosphate import                                                                            |
| P | O53832 | DE | ABC phosphate transporter 1;                                                                                                                        |
| P | O53832 | DE | Phosphate import ATP-binding protein PstB 1;                                                                                                        |
| P | O53832 | DE | Phosphate-transporting ATPase 1;                                                                                                                    |
| P | O53832 | DR | inorganic phosphate transmembrane transporter activity                                                                                              |
| P | O53832 | DR | phosphate transmembrane-transporting ATPase activity                                                                                                |
| P | O54189 | DR | cobalt ion transmembrane transporter activity                                                                                                       |
| P | O54584 | DE | Oligopeptide ABC transporter, periplasmic oligopeptide-binding protein (OppA-2).                                                                    |
| P | O54584 | DE | Oligopeptide permease periplasmic binding protein;                                                                                                  |
| P | O54794 | CC | Forms a channel for water and glycerol.                                                                                                             |
| P | O54794 | DR | water channel activity                                                                                                                              |
| P | O54982 | CC | Testis-specific potassium channel activated by both intracellular pH and membrane voltage that mediates export of K <sup>+</sup>                    |
| P | O54982 | DE | Potassium channel subfamily U member 1;                                                                                                             |

|   |        |    |                                                                                                                                                                                                                                                                                                     |
|---|--------|----|-----------------------------------------------------------------------------------------------------------------------------------------------------------------------------------------------------------------------------------------------------------------------------------------------------|
| P | O54982 | DE | pH-sensitive maxi potassium channel;                                                                                                                                                                                                                                                                |
| P | O55017 | CC | Calcium channels containing alpha-1B subunit may play a role in directed migration of immature neurons.                                                                                                                                                                                             |
| P | O55017 | CC | N-type calcium channels belong to the 'high-voltage activated' (HVA) group and are blocked by omega-conotoxin-GVIA (omega-CTx-GVIA) and by omega-agatoxin- IIIA (omega-Aga-IIIa)                                                                                                                    |
| P | O55017 | CC | The isoform alpha-1B gives rise to N-type calcium currents                                                                                                                                                                                                                                          |
| P | O55017 | CC | Voltage-sensitive calcium channels (VSCC) mediate the entry of calcium ions into excitable cells and are also involved in a variety of calcium-dependent processes, including muscle contraction, hormone or neurotransmitter release, gene expression, cell motility, cell division and cell death |
| P | O55017 | DE | Brain calcium channel III;                                                                                                                                                                                                                                                                          |
| P | O55017 | DE | Calcium channel, L type, alpha-1 polypeptide isoform 5;                                                                                                                                                                                                                                             |
| P | O55017 | DE | Voltage-dependent N-type calcium channel subunit alpha-1B;                                                                                                                                                                                                                                          |
| P | O55017 | DE | Voltage-gated calcium channel subunit alpha Cav2.2;                                                                                                                                                                                                                                                 |
| P | O55017 | DR | voltage-gated calcium channel activity                                                                                                                                                                                                                                                              |
| P | O55143 | CC | this magnesium-dependent enzyme catalyzes the hydrolysis of ATP coupled with the translocation of calcium from the cytosol to the sarcoplasmic reticulum                                                                                                                                            |
| P | O55143 | DE | human Calcium pump 2;                                                                                                                                                                                                                                                                               |
| P | O55143 | DE | Calcium-transporting ATPase sarcoplasmic reticulum type, slow twitch skeletal muscle isoform;                                                                                                                                                                                                       |
| P | O55143 | DE | Endoplasmic reticulum class 1/2 Ca2+ ATPase;                                                                                                                                                                                                                                                        |
| P | O55143 | DE | SR Ca2+-ATPase 2;                                                                                                                                                                                                                                                                                   |
| P | O55143 | DE | Sarcoplasmic/endoplasmic reticulum calcium ATPase 2;                                                                                                                                                                                                                                                |
| P | O55143 | DR | calcium-transporting ATPase activity                                                                                                                                                                                                                                                                |
| P | O59666 | CC | probably involved in copper transport and in the regulation of cellular copper level                                                                                                                                                                                                                |
| P | O59666 | CC | Retrieves copper from the metallochaperone atx1 and incorporates it into trans-Golgi vesicles (By similarity).                                                                                                                                                                                      |
| P | O59666 | DE | Copper-transporting ATPase ccc2;                                                                                                                                                                                                                                                                    |
| P | O59666 | DR | copper-exporting ATPase activity                                                                                                                                                                                                                                                                    |
| P | O59768 | CC | Has a role in promoting intracellular calcium ion sequestration via the exchange of calcium ions for hydrogen ions across the vacuolar membrane                                                                                                                                                     |
| P | O59768 | DE | Vacuolar Ca2+/H+ exchanger;                                                                                                                                                                                                                                                                         |
| P | O59768 | DE | Vacuolar calcium ion transporter;                                                                                                                                                                                                                                                                   |
| P | O59868 | CC | regulates cell morphogenesis through control of manganese and calcium homeostasis                                                                                                                                                                                                                   |
| P | O59868 | CC | Transports calcium and manganese ions into the cell                                                                                                                                                                                                                                                 |
| P | O59868 | DE | Calcium-transporting ATPase 1;                                                                                                                                                                                                                                                                      |
| P | O59868 | DE | Golgi Ca2+-ATPase;                                                                                                                                                                                                                                                                                  |
| P | O59868 | DR | calcium-transporting ATPase activity                                                                                                                                                                                                                                                                |
| P | O60721 | CC | Critical component of the visual transduction cascade, controlling the calcium concentration of outer segments during light and darkness                                                                                                                                                            |
| P | O60721 | CC | Light causes a rapid lowering of cytosolic free calcium in the outer segment of both retinal rod and cone photoreceptors and the light-induced lowering of calcium is caused by extrusion via this protein which plays a key role in the process of light adaptation                                |
| P | O60721 | CC | Transports 1 Ca2+ and 1 K+ in exchange for 4 Na+.                                                                                                                                                                                                                                                   |
| P | O60721 | CC | Transports 1 Ca2+ and 1 K+ in exchange for 4 Na+.                                                                                                                                                                                                                                                   |
| P | O60721 | CC | Transports 1 Ca2+ and 1 K+ in exchange for 4 Na+.                                                                                                                                                                                                                                                   |
| P | O60721 | DE | Na+/K+/Ca2+-exchange protein 1;                                                                                                                                                                                                                                                                     |
| P | O60721 | DE | Na+/K+/Ca2+-exchange protein 1;                                                                                                                                                                                                                                                                     |
| P | O60721 | DE | Na+/K+/Ca2+-exchange protein 1;                                                                                                                                                                                                                                                                     |
| P | O60721 | DE | Sodium/potassium/calcium exchanger 1;                                                                                                                                                                                                                                                               |
| P | O60721 | DE | Sodium/potassium/calcium exchanger 1;                                                                                                                                                                                                                                                               |
| P | O60721 | DE | Sodium/potassium/calcium exchanger 1;                                                                                                                                                                                                                                                               |
| P | O60721 | DR | calcium, potassium:sodium antiporter activity                                                                                                                                                                                                                                                       |
| P | O60721 | DR | calcium, potassium:sodium antiporter activity                                                                                                                                                                                                                                                       |
| P | O60721 | DR | calcium, potassium:sodium antiporter activity                                                                                                                                                                                                                                                       |
| P | O60741 | CC | Hyperpolarization-activated ion channel exhibiting weak selectivity for potassium over sodium ions                                                                                                                                                                                                  |
| P | O60741 | DE | Potassium/sodium hyperpolarization-activated cyclic nucleotide-gated channel 1;                                                                                                                                                                                                                     |
| P | O60741 | DR | voltage-gated potassium channel activity                                                                                                                                                                                                                                                            |
| P | O60779 | CC | High-affinity transporter for the intake of thiamine.                                                                                                                                                                                                                                               |
| P | O60779 | DE | Thiamine carrier 1;                                                                                                                                                                                                                                                                                 |
| P | O60779 | DE | Thiamine transporter 1;                                                                                                                                                                                                                                                                             |
| P | O60779 | DR | folic acid transporter activity                                                                                                                                                                                                                                                                     |
| P | O60779 | DR | reduced folate carrier activity                                                                                                                                                                                                                                                                     |



|   |        |    |                                                                                                                                                                                                                                                                                                     |
|---|--------|----|-----------------------------------------------------------------------------------------------------------------------------------------------------------------------------------------------------------------------------------------------------------------------------------------------------|
| P | O60779 | DR | thiamine uptake transmembrane transporter activity                                                                                                                                                                                                                                                  |
| P | O60840 | CC | Long-lasting (L-type) calcium channels belong to the 'high-voltage activated' (HVA) group                                                                                                                                                                                                           |
| P | O60840 | CC | The isoform alpha-1F gives rise to L-type calcium currents                                                                                                                                                                                                                                          |
| P | O60840 | CC | Voltage-sensitive calcium channels (VSCC) mediate the entry of calcium ions into excitable cells and are also involved in a variety of calcium-dependent processes, including muscle contraction, hormone or neurotransmitter release, gene expression, cell motility, cell division and cell death |
| P | O60840 | DE | Voltage-dependent L-type calcium channel subunit alpha-1F;                                                                                                                                                                                                                                          |
| P | O60840 | DE | Voltage-gated calcium channel subunit alpha Cav1.4;                                                                                                                                                                                                                                                 |
| P | O60840 | DR | voltage-gated calcium channel activity                                                                                                                                                                                                                                                              |
| P | O60928 | CC | Inward rectifier potassium channels are characterized by a greater tendency to allow potassium to flow into the cell rather than out of it                                                                                                                                                          |
| P | O60928 | CC | Their voltage dependence is regulated by the concentration of extracellular potassium; as external potassium is raised, the voltage range of the channel opening shifts to more positive voltages                                                                                                   |
| P | O60928 | DE | Inward rectifier K+ channel Kir7.1;                                                                                                                                                                                                                                                                 |
| P | O60928 | DE | Inward rectifier potassium channel 13;                                                                                                                                                                                                                                                              |
| P | O60928 | DE | Potassium channel, inwardly rectifying subfamily J member 13;                                                                                                                                                                                                                                       |
| P | O60928 | DR | inward rectifier potassium channel activity                                                                                                                                                                                                                                                         |
| P | O60931 | CC | Thought to transport cystine out of lysosomes.                                                                                                                                                                                                                                                      |
| P | O61365 | CC | Probable role in sodium transport.                                                                                                                                                                                                                                                                  |
| P | O61365 | DE | Sodium channel protein Nach;                                                                                                                                                                                                                                                                        |
| P | O61365 | DR | sodium channel activity                                                                                                                                                                                                                                                                             |
| P | O64738 | CC | May play a role in the transport of zinc in the plastids (By similarity).                                                                                                                                                                                                                           |
| P | O64738 | DE | Zinc transporter 6, chloroplastic;                                                                                                                                                                                                                                                                  |
| P | O64738 | DR | zinc ion transmembrane transporter activity                                                                                                                                                                                                                                                         |
| P | O64769 | CC | Probable potassium transporter.                                                                                                                                                                                                                                                                     |
| P | O64769 | DE | Potassium transporter 11;                                                                                                                                                                                                                                                                           |
| P | O64769 | DR | potassium ion transmembrane transporter activity                                                                                                                                                                                                                                                    |
| P | O64806 | CC | This magnesium-dependent enzyme catalyzes the hydrolysis of ATP coupled with the translocation of calcium from the cytosol out of the cell or into organelles (By similarity).                                                                                                                      |
| P | O64806 | DE | Ca2+-ATPase isoform 7;                                                                                                                                                                                                                                                                              |
| P | O64806 | DE | Putative calcium-transporting ATPase 7, plasma membrane-type;                                                                                                                                                                                                                                       |
| P | O64806 | DR | calcium-transporting ATPase activity                                                                                                                                                                                                                                                                |
| P | O65989 | CC | This system is involved in mannitol transport (By similarity).                                                                                                                                                                                                                                      |
| P | O65989 | DE | Mannitol permease IIC component;                                                                                                                                                                                                                                                                    |
| P | O65989 | DE | Mannitol-specific phosphotransferase enzyme IIB component;                                                                                                                                                                                                                                          |
| P | O65989 | DE | PTS system mannitol-specific EIIB component;                                                                                                                                                                                                                                                        |
| P | O65989 | DE | PTS system mannitol-specific EIIC component;                                                                                                                                                                                                                                                        |
| P | O65989 | DE | PTS system mannitol-specific EIICB component;                                                                                                                                                                                                                                                       |
| P | O66646 | DE | Lipoprotein-releasing system ATP-binding protein LolD;                                                                                                                                                                                                                                              |
| P | O66646 | DR | lipoprotein transporter activity                                                                                                                                                                                                                                                                    |
| P | O67154 | CC | Part of the ABC transporter complex PstSACB involved in phosphate import                                                                                                                                                                                                                            |
| P | O67154 | DE | ABC phosphate transporter;                                                                                                                                                                                                                                                                          |
| P | O67154 | DE | Phosphate import ATP-binding protein PstB;                                                                                                                                                                                                                                                          |
| P | O67154 | DE | Phosphate-transporting ATPase;                                                                                                                                                                                                                                                                      |
| P | O67154 | DR | inorganic phosphate transmembrane transporter activity                                                                                                                                                                                                                                              |
| P | O67154 | DR | phosphate transmembrane-transporting ATPase activity                                                                                                                                                                                                                                                |
| P | O67203 | DR | copper-exporting ATPase activity                                                                                                                                                                                                                                                                    |
| P | O67432 | DR | copper-exporting ATPase activity                                                                                                                                                                                                                                                                    |
| P | O68874 | CC | Channel that permits osmotically driven movement of water in both directions                                                                                                                                                                                                                        |
| P | O68874 | CC | It mediates rapid entry or exit of water in response to abrupt changes in osmolarity (By similarity).                                                                                                                                                                                               |
| P | O68877 | CC | Part of the ABC transporter complex HmuTUV involved in hemin import                                                                                                                                                                                                                                 |
| P | O68877 | DE | Hemin import ATP-binding protein HmuV;                                                                                                                                                                                                                                                              |
| P | O69443 | CC | H+-stimulated, highly selective, manganese uptake system (By similarity).                                                                                                                                                                                                                           |
| P | O69443 | DE | Probable manganese transport protein mnH;                                                                                                                                                                                                                                                           |
| P | O70247 | CC | Transports pantothenate, biotin and lipoate in the presence of sodium.                                                                                                                                                                                                                              |
| P | O70247 | CC | Transports pantothenate, biotin and lipoate in the presence of sodium.                                                                                                                                                                                                                              |
| P | O70247 | DE | Na+-dependent multivitamin transporter;                                                                                                                                                                                                                                                             |
| P | O70247 | DE | Sodium-dependent multivitamin transporter;                                                                                                                                                                                                                                                          |
| P | O70247 | DR | sodium-dependent multivitamin transmembrane transporter activity                                                                                                                                                                                                                                    |
| P | O70324 | DE | Monocarboxylate transporter 8;                                                                                                                                                                                                                                                                      |
| P | O70451 | CC | Proton-linked monocarboxylate transporter                                                                                                                                                                                                                                                           |

|   |        |    |                                                                                                                                                                                   |
|---|--------|----|-----------------------------------------------------------------------------------------------------------------------------------------------------------------------------------|
| P | O70451 | DE | Monocarboxylate transporter 2;                                                                                                                                                    |
| P | O70451 | DR | secondary active monocarboxylate transmembrane transporter activity                                                                                                               |
| P | O70491 | CC | Acts by removing retinol from RBP/RBP4 and transports it across the plasma membrane, where it can be metabolized                                                                  |
| P | O70491 | CC | Increases cellular retinol uptake from the retinol-RBP complex (By similarity).                                                                                                   |
| P | O70491 | CC | May act as a high-affinity cell-surface receptor for the complex retinol-retinol binding protein (RBP/RBP4)                                                                       |
| P | O70496 | CC | Mediates the exchange of chloride ions against protons                                                                                                                            |
| P | O70496 | DE | Chloride channel protein 7;                                                                                                                                                       |
| P | O70496 | DR | voltage-gated chloride channel activity                                                                                                                                           |
| P | O74750 | CC | sugar transporter that specifically mediates the transport of UDP-N-acetylglucosamine (UDP-GlcNAc) and is required for cell wall chitin synthesis (By similarity)                 |
| P | O74750 | DE | UDP-N-acetylglucosamine transporter yea4;                                                                                                                                         |
| P | O74969 | CC | High-affinity glucose transporter.                                                                                                                                                |
| P | O74969 | DE | High-affinity glucose transporter ght2;                                                                                                                                           |
| P | O75185 | CC | This magnesium-dependent enzyme catalyzes the hydrolysis of ATP coupled with the transport of calcium (By similarity).                                                            |
| P | O75185 | DE | Calcium-transporting ATPase type 2C member 2;                                                                                                                                     |
| P | O75185 | DE | Secretory pathway Ca <sup>2+</sup> -ATPase 2;                                                                                                                                     |
| P | O75185 | DR | calcium-transporting ATPase activity                                                                                                                                              |
| P | O75746 | CC | Calcium-dependent mitochondrial aspartate and glutamate carrier                                                                                                                   |
| P | O75746 | DE | Mitochondrial aspartate glutamate carrier 1;                                                                                                                                      |
| P | O75746 | DR | L-glutamate transmembrane transporter activity                                                                                                                                    |
| P | O76082 | CC | Also relative uptake activity ratio of carnitine to TEA is 11.3.                                                                                                                  |
| P | O76082 | CC | Also transports organic cations such as tetraethylammonium (TEA) without the involvement of sodium                                                                                |
| P | O76082 | CC | Involved in the active cellular uptake of carnitine                                                                                                                               |
| P | O76082 | CC | Sodium-ion dependent, high affinity carnitine transporter                                                                                                                         |
| P | O76082 | CC | Sodium-ion dependent, high affinity carnitine transporter                                                                                                                         |
| P | O76082 | CC | Transports one sodium ion with one molecule of carnitine                                                                                                                          |
| P | O76082 | CC | Transports one sodium ion with one molecule of carnitine                                                                                                                          |
| P | O76082 | DE | High-affinity sodium-dependent carnitine cotransporter;                                                                                                                           |
| P | O76082 | DE | High-affinity sodium-dependent carnitine cotransporter;                                                                                                                           |
| P | O76082 | DE | Organic cation/carnitine transporter 2;                                                                                                                                           |
| P | O76082 | DR | carnitine transporter activity                                                                                                                                                    |
| P | O76689 | CC | Mediates sodium-dependent uptake of acetylcholine at neuromuscular junctions during periods of increased synaptic activity, may also prevent spillover to adjacent synaptic sites |
| P | O76689 | DE | Sodium-dependent acetylcholine transporter;                                                                                                                                       |
| P | O76689 | DE | Sodium:neurotransmitter symporter family protein 6;                                                                                                                               |
| P | O76689 | DR | neurotransmitter:sodium symporter activity                                                                                                                                        |
| P | O76729 | DE | Biopterin transporter;                                                                                                                                                            |
| P | O80605 | CC | Responsible for the transport of sucrose into the cell, with the concomitant uptake of protons (symport system)                                                                   |
| P | O80605 | DE | Sucrose permease 3;                                                                                                                                                               |
| P | O80605 | DE | Sucrose transport protein SUC3;                                                                                                                                                   |
| P | O80605 | DE | Sucrose transporter 2;                                                                                                                                                            |
| P | O80605 | DE | Sucrose-proton symporter 3;                                                                                                                                                       |
| P | O80605 | DR | sucrose transmembrane transporter activity                                                                                                                                        |
| P | O80739 | CC | Putative potassium transporter.                                                                                                                                                   |
| P | O80739 | DE | Putative potassium transporter 12;                                                                                                                                                |
| P | O80739 | DR | potassium ion transmembrane transporter activity                                                                                                                                  |
| P | O81108 | CC | This magnesium-dependent enzyme catalyzes the hydrolysis of ATP coupled with the translocation of calcium from the cytosol into the endoplasmic reticulum                         |
| P | O81108 | DE | Ca <sup>2+</sup> -ATPase isoform 2;                                                                                                                                               |
| P | O81108 | DE | Calcium-transporting ATPase 2, plasma membrane-type;                                                                                                                              |
| P | O81108 | DR | calcium-transporting ATPase activity                                                                                                                                              |
| P | O81123 | CC | Mediates zinc uptake from the rhizosphere                                                                                                                                         |
| P | O81123 | DE | Zinc transporter 1;                                                                                                                                                               |
| P | O81123 | DR | zinc ion transmembrane transporter activity                                                                                                                                       |
| P | O81850 | CC | Could also be capable of transporting zinc ions.                                                                                                                                  |
| P | O81850 | CC | High-affinity iron transporter that mediates under iron- deficiency the iron uptake from the rhizosphere across the plasma membrane in the root epidermal layer                   |
| P | O81850 | DE | Iron-regulated transporter 2;                                                                                                                                                     |
| P | O81850 | DR | iron ion transmembrane transporter activity                                                                                                                                       |

|   |        |    |                                                                                                                                                                                                   |
|---|--------|----|---------------------------------------------------------------------------------------------------------------------------------------------------------------------------------------------------|
| P | O81850 | DR | zinc ion transmembrane transporter activity                                                                                                                                                       |
| P | O82316 | CC | Aquaporins facilitate the transport of water and small neutral solutes across cell membranes                                                                                                      |
| P | O82390 | CC | Specific for inorganic phosphate transport across the thylakoid membrane in a sodium dependent manner                                                                                             |
| P | O82390 | CC | Specific for inorganic phosphate transport across the thylakoid membrane in a sodium dependent manner                                                                                             |
| P | O82390 | DE | Na <sup>+</sup> /PI cotransporter 1;                                                                                                                                                              |
| P | O82390 | DE | Phosphate transporter PHT4;1;                                                                                                                                                                     |
| P | O82390 | DE | Sodium-dependent phosphate transport protein 1, chloroplastic;                                                                                                                                    |
| P | O82390 | DE | Sodium-dependent phosphate transport protein 1, chloroplastic;                                                                                                                                    |
| P | O82390 | DE | Sodium/phosphate cotransporter 1;                                                                                                                                                                 |
| P | O82390 | DE | Sodium/phosphate cotransporter 1;                                                                                                                                                                 |
| P | O82390 | DR | inorganic phosphate transmembrane transporter activity                                                                                                                                            |
| P | O82485 | DE | Oligopeptide transporter 7;                                                                                                                                                                       |
| P | O82485 | DR | oligopeptide transporter activity                                                                                                                                                                 |
| P | O82598 | CC | Potential aquaporin, which may facilitate the transport of water and small neutral solutes across cell membranes (By similarity).                                                                 |
| P | O82598 | DR | water channel activity                                                                                                                                                                            |
| P | O82643 | CC | Probably mediates zinc uptake from the rhizosphere (By similarity).                                                                                                                               |
| P | O82643 | DE | Zinc transporter 9;                                                                                                                                                                               |
| P | O82643 | DR | zinc ion transmembrane transporter activity                                                                                                                                                       |
| P | O82855 | CC | Confers resistance to several drugs, such as norfloxacin, ciprofloxacin, ethidium, kanamycin and streptomycin.                                                                                    |
| P | O82855 | CC | Confers resistance to several drugs, such as norfloxacin, ciprofloxacin, ethidium, kanamycin and streptomycin.                                                                                    |
| P | O83341 | DE | Ribose/galactose ABC transporter, ATP-binding protein (RbsA-2);                                                                                                                                   |
| P | O83342 | DE | Ribose/galactose ABC transporter, permease protein (RbsC-1);                                                                                                                                      |
| P | O83343 | DE | Ribose/galactose ABC transporter, permease protein (RbsC-2);                                                                                                                                      |
| P | O83658 | CC | part of the ABC transporter complex POTABCD involved in spermidine/putrescine import                                                                                                              |
| P | O83658 | CC | part of the ABC transporter complex POTABCD involved in spermidine/putrescine import                                                                                                              |
| P | O83658 | DE | Spermidine/putrescine import ATP-binding protein PotA;                                                                                                                                            |
| P | O83658 | DE | Spermidine/putrescine import ATP-binding protein PotA;                                                                                                                                            |
| P | O84068 | DE | ADP/ATP carrier protein 1;                                                                                                                                                                        |
| P | O84068 | DE | ADP/ATP translocase 1;                                                                                                                                                                            |
| P | O84068 | DE | ADP/ATP translocase 1;                                                                                                                                                                            |
| P | O84068 | DR | ATP:ADP antiporter activity                                                                                                                                                                       |
| P | O84068 | DR | ATP:ADP antiporter activity                                                                                                                                                                       |
| P | O84379 | CC | The arginine uptake by the bacterium in the macrophage may be a virulence factor against the host innate immune response (By similarity).                                                         |
| P | O84379 | DE | Arginine/agmatine antiporter;                                                                                                                                                                     |
| P | O84385 | CC | Binds arginine (By similarity)                                                                                                                                                                    |
| P | O84385 | CC | Probably part of an ABC transporter complex involved in arginine transport                                                                                                                        |
| P | O84385 | DE | Probable ABC transporter arginine-binding protein ArtJ;                                                                                                                                           |
| P | O85187 | CC | Na <sup>+</sup> /H <sup>+</sup> antiporter that extrudes sodium in exchange for external protons                                                                                                  |
| P | O85187 | DE | Na <sup>+</sup> /H <sup>+</sup> antiporter nhaA;                                                                                                                                                  |
| P | O85187 | DE | Sodium/proton antiporter nhaA;                                                                                                                                                                    |
| P | O86345 | CC | part of the binding-protein-dependent transport system for phosphate; probably responsible for the translocation of the substrate across the membrane (By similarity)                             |
| P | O86345 | DE | Phosphate transport system permease protein pstA 1;                                                                                                                                               |
| P | O86345 | DR | inorganic phosphate transmembrane transporter activity                                                                                                                                            |
| P | O87656 | DE | Iron(III)-hydroxamate import system permease protein fhuB;                                                                                                                                        |
| P | O88335 | CC | In the kidney, probably plays a major role in potassium homeostasis                                                                                                                               |
| P | O88335 | CC | Inward rectifier potassium channels are characterized by a greater tendency to allow potassium to flow into the cell rather than out of it                                                        |
| P | O88335 | CC | Their voltage dependence is regulated by the concentration of extracellular potassium; as external potassium is raised, the voltage range of the channel opening shifts to more positive voltages |
| P | O88335 | DE | ATP-regulated potassium channel ROM-K;                                                                                                                                                            |
| P | O88335 | DE | ATP-sensitive inward rectifier potassium channel 1;                                                                                                                                               |
| P | O88335 | DE | Inward rectifier K <sup>+</sup> channel Kir1.1;                                                                                                                                                   |
| P | O88335 | DE | Potassium channel, inwardly rectifying subfamily J member 1;                                                                                                                                      |
| P | O88335 | DR | inward rectifier potassium channel activity                                                                                                                                                       |
| P | O88343 | CC | Electrogenic sodium/bicarbonate cotransporter with a Na <sup>+</sup> :HCO <sub>3</sub> <sup>-</sup> ) stoichiometry varying from 1:2 to 1:3                                                       |

|   |        |    |                                                                                                                                                                                                   |
|---|--------|----|---------------------------------------------------------------------------------------------------------------------------------------------------------------------------------------------------|
| P | O88343 | CC | Electrogenic sodium/bicarbonate cotransporter with a Na <sup>+</sup> :HCO <sub>3</sub> <sup>-</sup> stoichiometry varying from 1:2 to 1:3                                                         |
| P | O88343 | CC | May regulate bicarbonate influx/efflux at the basolateral membrane of cells and regulate intracellular pH.                                                                                        |
| P | O88343 | DE | Na <sup>+</sup> /HCO <sub>3</sub> <sup>-</sup> cotransporter;                                                                                                                                     |
| P | O88397 | CC | Mediates the Na <sup>+</sup> -independent transport of organic anions such as taurocholate and thyroid hormones.                                                                                  |
| P | O88397 | DR | thyroid hormone transmembrane transporter activity                                                                                                                                                |
| P | O88454 | CC | Outward rectification is reversed at high external K <sup>+</sup> concentrations.                                                                                                                 |
| P | O88454 | CC | Voltage insensitive, instantaneous, outwardly rectifying potassium channel                                                                                                                        |
| P | O88454 | DE | Potassium channel subfamily K member 4;                                                                                                                                                           |
| P | O88454 | DE | TWIK-related arachidonic acid-stimulated potassium channel protein;                                                                                                                               |
| P | O88454 | DR | potassium channel activity                                                                                                                                                                        |
| P | O88575 | DE | Sodium- and chloride-dependent transporter XTRP3B;                                                                                                                                                |
| P | O88575 | DR | neurotransmitter:sodium symporter activity                                                                                                                                                        |
| P | O88576 | DE | Sodium- and chloride-dependent transporter XTRP2;                                                                                                                                                 |
| P | O88576 | DE | Sodium-dependent neutral amino acid transporter B(0)AT3;                                                                                                                                          |
| P | O88576 | DR | neurotransmitter:sodium symporter activity                                                                                                                                                        |
| P | O88703 | CC | Hyperpolarization-activated ion channel exhibiting weak selectivity for potassium over sodium ions                                                                                                |
| P | O88703 | DE | Potassium/sodium hyperpolarization-activated cyclic nucleotide-gated channel 2;                                                                                                                   |
| P | O88703 | DE | Potassium/sodium hyperpolarization-activated cyclic nucleotide-gated channel 2;                                                                                                                   |
| P | O88703 | DR | sodium channel activity                                                                                                                                                                           |
| P | O88703 | DR | voltage-gated potassium channel activity                                                                                                                                                          |
| P | O88704 | CC | Hyperpolarization-activated ion channel exhibiting weak selectivity for potassium over sodium ions                                                                                                |
| P | O88704 | DE | Potassium/sodium hyperpolarization-activated cyclic nucleotide-gated channel 1;                                                                                                                   |
| P | O88704 | DE | Potassium/sodium hyperpolarization-activated cyclic nucleotide-gated channel 1;                                                                                                                   |
| P | O88704 | DR | sodium channel activity                                                                                                                                                                           |
| P | O88704 | DR | voltage-gated potassium channel activity                                                                                                                                                          |
| P | O88705 | CC | Putative hyperpolarization-activated ion channel exhibiting weak selectivity for potassium over sodium ions.                                                                                      |
| P | O88705 | DE | Potassium/sodium hyperpolarization-activated cyclic nucleotide-gated channel 3;                                                                                                                   |
| P | O88705 | DE | Potassium/sodium hyperpolarization-activated cyclic nucleotide-gated channel 3;                                                                                                                   |
| P | O88705 | DR | sodium channel activity                                                                                                                                                                           |
| P | O88705 | DR | voltage-gated potassium channel activity                                                                                                                                                          |
| P | O88932 | CC | Inward rectifier potassium channels are characterized by a greater tendency to allow potassium to flow into the cell rather than out of it                                                        |
| P | O88932 | CC | Their voltage dependence is regulated by the concentration of extracellular potassium; as external potassium is raised, the voltage range of the channel opening shifts to more positive voltages |
| P | O88932 | DE | ATP-sensitive inward rectifier potassium channel 15;                                                                                                                                              |
| P | O88932 | DE | Inward rectifier K <sup>+</sup> channel Kir4.2;                                                                                                                                                   |
| P | O88932 | DE | Potassium channel, inwardly rectifying subfamily J member 15;                                                                                                                                     |
| P | O89109 | CC | forms a voltage-independent potassium channel that is activated by intracellular calcium                                                                                                          |
| P | O94469 | CC | Involved in active transport of urea (By similarity).                                                                                                                                             |
| P | O94469 | DE | Probable urea active transporter 1;                                                                                                                                                               |
| P | O94639 | CC | High-affinity zinc transport protein                                                                                                                                                              |
| P | O94639 | CC | Regulates intracellular zinc levels.                                                                                                                                                              |
| P | O94639 | DE | High-affinity zinc transport protein zrt1;                                                                                                                                                        |
| P | O94639 | DE | Zinc-regulated transporter 1;                                                                                                                                                                     |
| P | O94639 | DR | zinc ion transmembrane transporter activity                                                                                                                                                       |
| P | O94722 | CC | Required for high affinity copper (probably reduced Cu I) transport into the cell.                                                                                                                |
| P | O94722 | DE | Copper transport protein ctr4;                                                                                                                                                                    |
| P | O94722 | DE | Copper transporter 4;                                                                                                                                                                             |
| P | O94722 | DR | copper ion transmembrane transporter activity                                                                                                                                                     |
| P | O94759 | CC | Extracellular calcium passes through the channel and acts from the intracellular side as a positive regulator in channel activation                                                               |
| P | O94759 | CC | Nonselective, voltage-independent cation channel mediating sodium and calcium ion influx in response to oxidative stress                                                                          |
| P | O94759 | DR | calcium channel activity                                                                                                                                                                          |
| P | O94778 | CC | Forms a water-specific channel; mercury-sensitive                                                                                                                                                 |
| P | O94778 | DR | water channel activity                                                                                                                                                                            |
| P | O95180 | CC | T-type calcium channels belong to the "low-voltage activated (LVA)" group and are strongly blocked by nickel and mibefradil                                                                       |

|   |        |    |                                                                                                                                                                                                                                                                                                     |
|---|--------|----|-----------------------------------------------------------------------------------------------------------------------------------------------------------------------------------------------------------------------------------------------------------------------------------------------------|
| P | O95180 | CC | T-type channels serve pacemaking functions in both central neurons and cardiac nodal cells and support calcium signaling in secretory cells and vascular smooth muscle.                                                                                                                             |
| P | O95180 | CC | The isoform alpha-1H gives rise to T-type calcium currents                                                                                                                                                                                                                                          |
| P | O95180 | CC | Voltage-sensitive calcium channels (VSCC) mediate the entry of calcium ions into excitable cells and are also involved in a variety of calcium-dependent processes, including muscle contraction, hormone or neurotransmitter release, gene expression, cell motility, cell division and cell death |
| P | O95180 | DE | Low-voltage-activated calcium channel alpha1.3.2 subunit;                                                                                                                                                                                                                                           |
| P | O95180 | DE | Voltage-dependent T-type calcium channel subunit alpha-1H;                                                                                                                                                                                                                                          |
| P | O95180 | DE | Voltage-gated calcium channel subunit alpha Cav3.2;                                                                                                                                                                                                                                                 |
| P | O95180 | DR | low voltage-gated calcium channel activity                                                                                                                                                                                                                                                          |
| P | O95255 | CC | Transports glutathione conjugates as leukotriene-c4 (LTC4) and N-ethylmaleimide S-glutathione (NEM-GS).                                                                                                                                                                                             |
| P | O95259 | CC | Pore-forming (alpha) subunit of voltage-gated non-inactivating delayed rectifier potassium channel                                                                                                                                                                                                  |
| P | O95259 | DE | Ether-a-go-go potassium channel 1;                                                                                                                                                                                                                                                                  |
| P | O95259 | DE | Potassium voltage-gated channel subfamily H member 1;                                                                                                                                                                                                                                               |
| P | O95259 | DE | Voltage-gated potassium channel subunit Kv10.1;                                                                                                                                                                                                                                                     |
| P | O95259 | DR | delayed rectifier potassium channel activity                                                                                                                                                                                                                                                        |
| P | O95279 | CC | Outward rectification is lost at high external K+ concentrations.                                                                                                                                                                                                                                   |
| P | O95279 | CC | pH-dependent, voltage insensitive, outwardly rectifying potassium channel                                                                                                                                                                                                                           |
| P | O95279 | DE | Acid-sensitive potassium channel protein TASK-2;                                                                                                                                                                                                                                                    |
| P | O95279 | DE | Potassium channel subfamily K member 5;                                                                                                                                                                                                                                                             |
| P | O95279 | DE | TWIK-related acid-sensitive K+ channel 2;                                                                                                                                                                                                                                                           |
| P | O95279 | DR | potassium channel activity                                                                                                                                                                                                                                                                          |
| P | O95342 | DE | Bile salt export pump;                                                                                                                                                                                                                                                                              |
| P | O95342 | DR | bile acid-exporting ATPase activity                                                                                                                                                                                                                                                                 |
| P | O95342 | DR | canalicular bile acid transmembrane transporter activity                                                                                                                                                                                                                                            |
| P | O95436 | CC | It may be the main phosphate transport protein in the intestinal brush border membrane.                                                                                                                                                                                                             |
| P | O95436 | CC | May be involved in actively transporting phosphate into cells via Na+ cotransport                                                                                                                                                                                                                   |
| P | O95436 | CC | May be involved in actively transporting phosphate into cells via Na+ cotransport                                                                                                                                                                                                                   |
| P | O95436 | DE | Na+-dependent phosphate cotransporter 2B;                                                                                                                                                                                                                                                           |
| P | O95436 | DE | Na+-dependent phosphate cotransporter 2B;                                                                                                                                                                                                                                                           |
| P | O95436 | DE | Na+/Pi cotransporter 2B;                                                                                                                                                                                                                                                                            |
| P | O95436 | DE | Sodium-dependent phosphate transport protein 2B;                                                                                                                                                                                                                                                    |
| P | O95436 | DE | Sodium-dependent phosphate transport protein 2B;                                                                                                                                                                                                                                                    |
| P | O95436 | DE | Sodium-phosphate transport protein 2B;                                                                                                                                                                                                                                                              |
| P | O95436 | DE | Sodium/phosphate cotransporter 2B;                                                                                                                                                                                                                                                                  |
| P | O95436 | DE | Sodium/phosphate cotransporter 2B;                                                                                                                                                                                                                                                                  |
| P | O95436 | DR | sodium-dependent phosphate transmembrane transporter activity                                                                                                                                                                                                                                       |
| P | O95436 | DR | sodium-dependent phosphate transmembrane transporter activity                                                                                                                                                                                                                                       |
| P | O95436 | DR | sodium:phosphate symporter activity                                                                                                                                                                                                                                                                 |
| P | O95436 | DR | sodium:phosphate symporter activity                                                                                                                                                                                                                                                                 |
| P | O95528 | DR | sugar:hydrogen symporter activity                                                                                                                                                                                                                                                                   |
| P | O95833 | CC | Can insert into membranes and form chloride ion channels                                                                                                                                                                                                                                            |
| P | O95833 | DE | Chloride intracellular channel protein 3;                                                                                                                                                                                                                                                           |
| P | O95833 | DR | voltage-gated chloride channel activity                                                                                                                                                                                                                                                             |
| P | O95907 | CC | Proton-linked monocarboxylate transporter                                                                                                                                                                                                                                                           |
| P | O95907 | DE | Monocarboxylate transporter 3;                                                                                                                                                                                                                                                                      |
| P | O95907 | DR | secondary active monocarboxylate transmembrane transporter activity                                                                                                                                                                                                                                 |
| P | O97470 | CC | Catalyzes the exchange of ADP and ATP across the mitochondrial inner membrane.                                                                                                                                                                                                                      |
| P | O97470 | CC | Catalyzes the exchange of ADP and ATP across the mitochondrial inner membrane.                                                                                                                                                                                                                      |
| P | O97470 | DE | ADP/ATP carrier protein;                                                                                                                                                                                                                                                                            |
| P | O97470 | DE | ADP/ATP translocase;                                                                                                                                                                                                                                                                                |
| P | O97470 | DE | ADP/ATP translocase;                                                                                                                                                                                                                                                                                |
| P | P00550 | CC | This system is involved in mannitol transport.                                                                                                                                                                                                                                                      |
| P | P00550 | DE | Mannitol permease IIC component;                                                                                                                                                                                                                                                                    |
| P | P00550 | DE | Mannitol-specific phosphotransferase enzyme IIA component;                                                                                                                                                                                                                                          |
| P | P00550 | DE | Mannitol-specific phosphotransferase enzyme IIB component;                                                                                                                                                                                                                                          |
| P | P00550 | DE | PTS system mannitol-specific EIIC component;                                                                                                                                                                                                                                                        |
| P | P00550 | DE | PTS system mannitol-specific EIIB component;                                                                                                                                                                                                                                                        |
| P | P00550 | DE | PTS system mannitol-specific EIIC component;                                                                                                                                                                                                                                                        |
| P | P00550 | DE | PTS system mannitol-specific EIICBA component;                                                                                                                                                                                                                                                      |
| P | P02723 | CC | Catalyzes the exchange of ADP and ATP across the mitochondrial inner membrane.                                                                                                                                                                                                                      |
| P | P02723 | CC | Catalyzes the exchange of ADP and ATP across the mitochondrial inner membrane.                                                                                                                                                                                                                      |

|   |        |    |                                                                                                                                                                                                                                   |
|---|--------|----|-----------------------------------------------------------------------------------------------------------------------------------------------------------------------------------------------------------------------------------|
| P | P02723 | DE | ADP,ATP carrier protein;                                                                                                                                                                                                          |
| P | P02723 | DE | ADP/ATP translocase;                                                                                                                                                                                                              |
| P | P02723 | DE | ADP/ATP translocase;                                                                                                                                                                                                              |
| P | P02730 | DR | chloride transmembrane transporter activity                                                                                                                                                                                       |
| P | P02906 | CC | This protein specifically binds sulfate and is involved in its transmembrane transport                                                                                                                                            |
| P | P02906 | DE | Sulfate-binding protein;                                                                                                                                                                                                          |
| P | P02906 | DR | secondary active sulfate transmembrane transporter activity                                                                                                                                                                       |
| P | P02906 | DR | sulfate transmembrane-transporting ATPase activity                                                                                                                                                                                |
| P | P02910 | CC | Component of the high-affinity histidine permease, a binding-protein-dependent transport system                                                                                                                                   |
| P | P02910 | DE | Histidine-binding periplasmic protein;                                                                                                                                                                                            |
| P | P02915 | CC | Part of the binding-protein-dependent transport system for histidine                                                                                                                                                              |
| P | P02915 | DE | Histidine transport ATP-binding protein HisP;                                                                                                                                                                                     |
| P | P02916 | CC | Part of the binding-protein-dependent transport system for maltose; probably responsible for the translocation of the substrate across the membrane.                                                                              |
| P | P02916 | DE | Maltose transport system permease protein malF;                                                                                                                                                                                   |
| P | P02916 | DR | maltose-transporting ATPase activity                                                                                                                                                                                              |
| P | P02920 | DE | Lactose permease;                                                                                                                                                                                                                 |
| P | P02920 | DE | Lactose-proton symport;                                                                                                                                                                                                           |
| P | P02920 | DR | lactose:hydrogen symporter activity                                                                                                                                                                                               |
| P | P02932 | CC | Uptake of inorganic phosphate, phosphorylated compounds, and some other negatively charged solutes.                                                                                                                               |
| P | P02982 | CC | Resistance to tetracycline by an active tetracycline efflux                                                                                                                                                                       |
| P | P02982 | CC | This protein functions as a metal-tetracycline/H <sup>+</sup> antiporter.                                                                                                                                                         |
| P | P02982 | DE | Tetracycline resistance protein, class A;                                                                                                                                                                                         |
| P | P02982 | DR | tetracycline:hydrogen antiporter activity                                                                                                                                                                                         |
| P | P02983 | CC | Resistance to tetracycline by an active tetracycline efflux                                                                                                                                                                       |
| P | P02983 | CC | This protein functions as a metal-tetracycline/H <sup>+</sup> antiporter.                                                                                                                                                         |
| P | P02983 | DE | Tetracycline efflux protein;                                                                                                                                                                                                      |
| P | P02983 | DE | Tetracycline resistance protein;                                                                                                                                                                                                  |
| P | P02983 | DR | tetracycline:hydrogen antiporter activity                                                                                                                                                                                         |
| P | P03959 | CC | One of the components of the high-affinity ATP-driven potassium transport (or KDP) system, which catalyzes the hydrolysis of ATP coupled with the exchange of hydrogen and potassium ions.                                        |
| P | P03959 | DE | Potassium-binding and translocating subunit A;                                                                                                                                                                                    |
| P | P03959 | DE | Potassium-translocating ATPase A chain;                                                                                                                                                                                           |
| P | P03959 | DE | Potassium-transporting ATPase A chain;                                                                                                                                                                                            |
| P | P03959 | DR | potassium-transporting ATPase activity                                                                                                                                                                                            |
| P | P03960 | CC | One of the components of the high-affinity ATP-driven potassium transport (or KDP) system, which catalyzes the hydrolysis of ATP coupled with the exchange of hydrogen and potassium ions.                                        |
| P | P03960 | DE | Potassium-binding and translocating subunit B;                                                                                                                                                                                    |
| P | P03960 | DE | Potassium-translocating ATPase B chain;                                                                                                                                                                                           |
| P | P03960 | DE | Potassium-transporting ATPase B chain;                                                                                                                                                                                            |
| P | P03960 | DR | potassium-transporting ATPase activity                                                                                                                                                                                            |
| P | P03961 | CC | One of the components of the high-affinity ATP-driven potassium transport (or KDP) system, which catalyzes the hydrolysis of ATP coupled with the exchange of hydrogen and potassium ions                                         |
| P | P03961 | DE | Potassium-binding and translocating subunit C;                                                                                                                                                                                    |
| P | P03961 | DE | Potassium-translocating ATPase C chain;                                                                                                                                                                                           |
| P | P03961 | DE | Potassium-transporting ATPase C chain;                                                                                                                                                                                            |
| P | P03961 | DR | potassium-transporting ATPase activity                                                                                                                                                                                            |
| P | P04285 | DE | Oligopeptide transport ATP-binding protein OppD;                                                                                                                                                                                  |
| P | P04710 | CC | Catalyzes the exchange of ADP and ATP across the mitochondrial inner membrane                                                                                                                                                     |
| P | P04710 | CC | Catalyzes the exchange of ADP and ATP across the mitochondrial inner membrane                                                                                                                                                     |
| P | P04710 | DE | ADP,ATP carrier protein 1;                                                                                                                                                                                                        |
| P | P04710 | DE | ADP/ATP translocase 1;                                                                                                                                                                                                            |
| P | P04710 | DE | ADP/ATP translocase 1;                                                                                                                                                                                                            |
| P | P04710 | DR | ATP:ADP antiporter activity                                                                                                                                                                                                       |
| P | P04710 | DR | ATP:ADP antiporter activity                                                                                                                                                                                                       |
| P | P04816 | CC | This protein is a component of the leucine-specific transport system, which is one of the two periplasmic binding protein-dependent transport systems of the high-affinity transport of the branched-chain amino acids in E.coli. |
| P | P04816 | DE | Leucine-specific-binding protein;                                                                                                                                                                                                 |
| P | P04817 | CC | High-affinity permease for arginine.                                                                                                                                                                                              |

|   |        |    |                                                                                                                                                                                                                                                                                                     |
|---|--------|----|-----------------------------------------------------------------------------------------------------------------------------------------------------------------------------------------------------------------------------------------------------------------------------------------------------|
| P | P04817 | DE | Arginine permease;                                                                                                                                                                                                                                                                                  |
| P | P04817 | DR | arginine transmembrane transporter activity                                                                                                                                                                                                                                                         |
| P | P04919 | DR | chloride transmembrane transporter activity                                                                                                                                                                                                                                                         |
| P | P04983 | CC | Part of the ABC transporter complex RbsABCD involved in ribose import                                                                                                                                                                                                                               |
| P | P04983 | DE | Ribose import ATP-binding protein RbsA;                                                                                                                                                                                                                                                             |
| P | P05023 | CC | This action creates the electrochemical gradient of sodium and potassium ions, providing the energy for active transport of various nutrients.                                                                                                                                                      |
| P | P05023 | CC | This action creates the electrochemical gradient of sodium and potassium ions, providing the energy for active transport of various nutrients.                                                                                                                                                      |
| P | P05023 | CC | This is the catalytic component of the active enzyme, which catalyzes the hydrolysis of ATP coupled with the exchange of sodium and potassium ions across the plasma membrane                                                                                                                       |
| P | P05023 | CC | This is the catalytic component of the active enzyme, which catalyzes the hydrolysis of ATP coupled with the exchange of sodium and potassium ions across the plasma membrane                                                                                                                       |
| P | P05023 | DE | Na <sup>+</sup> /K <sup>+</sup> ATPase alpha-1 subunit;                                                                                                                                                                                                                                             |
| P | P05023 | DE | Na <sup>+</sup> /K <sup>+</sup> ATPase alpha-1 subunit;                                                                                                                                                                                                                                             |
| P | P05023 | DE | Sodium pump subunit alpha-1;                                                                                                                                                                                                                                                                        |
| P | P05023 | DE | Sodium/potassium-transporting ATPase subunit alpha-1;                                                                                                                                                                                                                                               |
| P | P05023 | DE | Sodium/potassium-transporting ATPase subunit alpha-1;                                                                                                                                                                                                                                               |
| P | P05023 | DR | sodium:potassium-exchanging ATPase activity                                                                                                                                                                                                                                                         |
| P | P05023 | DR | sodium:potassium-exchanging ATPase activity                                                                                                                                                                                                                                                         |
| P | P05026 | CC | The beta subunit regulates, through assembly of alpha/beta heterodimers, the number of sodium pumps transported to the plasma membrane.                                                                                                                                                             |
| P | P05026 | CC | This is the non-catalytic component of the active enzyme, which catalyzes the hydrolysis of ATP coupled with the exchange of Na <sup>+</sup> and K <sup>+</sup> ions across the plasma membrane                                                                                                     |
| P | P05026 | CC | This is the non-catalytic component of the active enzyme, which catalyzes the hydrolysis of ATP coupled with the exchange of Na <sup>+</sup> and K <sup>+</sup> ions across the plasma membrane                                                                                                     |
| P | P05026 | DE | Sodium/potassium-dependent ATPase subunit beta-1;                                                                                                                                                                                                                                                   |
| P | P05026 | DE | Sodium/potassium-dependent ATPase subunit beta-1;                                                                                                                                                                                                                                                   |
| P | P05026 | DE | Sodium/potassium-transporting ATPase subunit beta-1;                                                                                                                                                                                                                                                |
| P | P05026 | DE | Sodium/potassium-transporting ATPase subunit beta-1;                                                                                                                                                                                                                                                |
| P | P05026 | DR | sodium:potassium-exchanging ATPase activity                                                                                                                                                                                                                                                         |
| P | P05026 | DR | sodium:potassium-exchanging ATPase activity                                                                                                                                                                                                                                                         |
| P | P05141 | CC | Catalyzes the exchange of ADP and ATP across the mitochondrial inner membrane                                                                                                                                                                                                                       |
| P | P05141 | CC | Catalyzes the exchange of ADP and ATP across the mitochondrial inner membrane                                                                                                                                                                                                                       |
| P | P05141 | DE | ADP,ATP carrier protein 2;                                                                                                                                                                                                                                                                          |
| P | P05141 | DE | ADP,ATP carrier protein, fibroblast isoform;                                                                                                                                                                                                                                                        |
| P | P05141 | DE | ADP/ATP translocase 2;                                                                                                                                                                                                                                                                              |
| P | P05141 | DE | ADP/ATP translocase 2;                                                                                                                                                                                                                                                                              |
| P | P05316 | CC | Transport of uracil.                                                                                                                                                                                                                                                                                |
| P | P05316 | DE | Uracil permease;                                                                                                                                                                                                                                                                                    |
| P | P05316 | DR | uracil:cation symporter activity                                                                                                                                                                                                                                                                    |
| P | P05425 | CC | Involved in copper export                                                                                                                                                                                                                                                                           |
| P | P05425 | DE | Copper-exporting P-type ATPase B;                                                                                                                                                                                                                                                                   |
| P | P05425 | DR | copper-exporting ATPase activity                                                                                                                                                                                                                                                                    |
| P | P05695 | CC | Anion specific, the binding site has higher affinity for phosphate than chloride ions                                                                                                                                                                                                               |
| P | P05695 | CC | Porin O has a higher affinity for polyphosphates (tripolyphosphate and pyrophosphate) while porin P has a higher affinity for orthophosphate. This protein is involved in the initial step of iron uptake by binding ferrienterobactin (Fe-ENT), an iron chelatin siderophore that allows E.coli to |
| P | P05825 | CC | This protein is a component of the ongopeptide permease, a binding protein-dependent transport system, it binds peptides up to five amino acids long with high affinity                                                                                                                             |
| P | P06202 | DE | Periplasmic oligopeptide-binding protein;                                                                                                                                                                                                                                                           |
| P | P06609 | CC | Part of the ABC transporter complex BtuCDF involved in vitamin B12 import                                                                                                                                                                                                                           |
| P | P06609 | DE | Vitamin B12 import system permease protein BtuC;                                                                                                                                                                                                                                                    |
| P | P06611 | CC | Part of the ABC transporter complex BtuCDF involved in vitamin B12 import                                                                                                                                                                                                                           |
| P | P06611 | DE | Vitamin B12 import ATP-binding protein BtuD;                                                                                                                                                                                                                                                        |
| P | P06611 | DE | Vitamin B12-transporting ATPase;                                                                                                                                                                                                                                                                    |
| P | P06775 | CC | High-affinity permease for histidine.                                                                                                                                                                                                                                                               |
| P | P06775 | DE | Histidine permease;                                                                                                                                                                                                                                                                                 |
| P | P06971 | CC | It interacts with the tonB protein, which is responsible for energy coupling of the ferrichrome-promoted iron transport system                                                                                                                                                                      |
| P | P06971 | CC | It interacts with the tonB protein, which is responsible for energy coupling of the ferrichrome-promoted iron transport system                                                                                                                                                                      |

|   |        |    |                                                                                                                                                                                                            |
|---|--------|----|------------------------------------------------------------------------------------------------------------------------------------------------------------------------------------------------------------|
| P | P06971 | CC | This receptor binds the ferrichrome-iron ligand                                                                                                                                                            |
| P | P06971 | DE | Ferrichrome-iron receptor;                                                                                                                                                                                 |
| P | P07038 | CC | The proton gradient it generates drives the active transport of nutrients by H <sup>+</sup> -coupling                                                                                                      |
| P | P07117 | CC | Catalyzes the sodium-dependent uptake of extracellular L-proline                                                                                                                                           |
| P | P07117 | DE | Proline permease;                                                                                                                                                                                          |
| P | P07117 | DE | Sodium/proline symporter;                                                                                                                                                                                  |
| P | P07117 | DE | Sodium/proline symporter;                                                                                                                                                                                  |
| P | P07117 | DR | proline:sodium symporter activity                                                                                                                                                                          |
| P | P07117 | DR | proline:sodium symporter activity                                                                                                                                                                          |
| P | P07654 | CC | Part of the binding-protein-dependent transport system for phosphate; probably responsible for the translocation of the substrate across the membrane.                                                     |
| P | P07654 | DE | Phosphate transport system permease protein pstA;                                                                                                                                                          |
| P | P07654 | DR | inorganic phosphate transmembrane transporter activity                                                                                                                                                     |
| P | P07775 | CC | Probably involved in the transport of benzoate.                                                                                                                                                            |
| P | P07775 | DE | Benzoate membrane transport protein;                                                                                                                                                                       |
| P | P07893 | CC | Involved in copper transport.                                                                                                                                                                              |
| P | P07893 | DE | Probable copper-transporting ATPase SynA;                                                                                                                                                                  |
| P | P07893 | DR | copper-exporting ATPase activity                                                                                                                                                                           |
| P | P07921 | CC | LAC12 mediates the transport of lactose and it would appear that the permease works in part by a proton symport mechanism.                                                                                 |
| P | P07921 | DE | Lactose permease;                                                                                                                                                                                          |
| P | P08005 | DE | Oligopeptide transport system permease protein oppB;                                                                                                                                                       |
| P | P08006 | DE | Oligopeptide transport system permease protein oppC;                                                                                                                                                       |
| P | P08007 | DE | Oligopeptide transport ATP-binding protein OppF;                                                                                                                                                           |
| P | P08194 | DR | glycerol-phosphate:inorganic phosphate antiporter activity                                                                                                                                                 |
| P | P08194 | DR | glycerol-phosphate:inorganic phosphate antiporter activity                                                                                                                                                 |
| P | P08470 | CC | This system is involved in sucrose transport.                                                                                                                                                              |
| P | P08470 | DE | PTS system sucrose-specific EIIB component;                                                                                                                                                                |
| P | P08470 | DE | PTS system sucrose-specific EIIBC component;                                                                                                                                                               |
| P | P08470 | DE | PTS system sucrose-specific EIIC component;                                                                                                                                                                |
| P | P08470 | DE | Sucrose permease IIC component;                                                                                                                                                                            |
| P | P08470 | DE | Sucrose-specific phosphotransferase enzyme IIB component;                                                                                                                                                  |
| P | P08690 | CC | Catalyzes the extrusion of the oxyanions arsenite, antimonite and arsenate                                                                                                                                 |
| P | P08690 | DE | Arsenite-translocating ATPase;                                                                                                                                                                             |
| P | P08690 | DE | Arsenite-transporting ATPase;                                                                                                                                                                              |
| P | P08690 | DR | arsenite-transporting ATPase activity                                                                                                                                                                      |
| P | P09131 | DR | bile acid:sodium symporter activity                                                                                                                                                                        |
| P | P09131 | DR | bile acid:sodium symporter activity                                                                                                                                                                        |
| P | P09551 | CC | ArgT and histidine-binding protein J (hisJ) interact with a common membrane-bound receptor, hisP.                                                                                                          |
| P | P09551 | CC | This periplasmic binding protein is involved in an arginine transport system                                                                                                                               |
| P | P09551 | DE | Lysine-arginine-ornithine-binding periplasmic protein;                                                                                                                                                     |
| P | P09833 | DR | molybdate transmembrane-transporting ATPase activity                                                                                                                                                       |
| P | P0A008 | CC | One of the components of the high-affinity ATP-driven potassium transport (or KDP) system, which catalyzes the hydrolysis of ATP coupled with the exchange of hydrogen and potassium ions (By similarity). |
| P | P0A008 | DE | Potassium-binding and translocating subunit B 1;                                                                                                                                                           |
| P | P0A008 | DE | Potassium-translocating ATPase B chain 1;                                                                                                                                                                  |
| P | P0A008 | DE | Potassium-transporting ATPase B chain 1;                                                                                                                                                                   |
| P | P0A008 | DR | potassium-transporting ATPase activity                                                                                                                                                                     |
| P | P0A057 | CC | One of the components of the high-affinity ATP-driven potassium transport (or KDP) system, which catalyzes the hydrolysis of ATP coupled with the exchange of hydrogen and potassium ions (By similarity). |
| P | P0A057 | DE | Potassium-binding and translocating subunit A 2;                                                                                                                                                           |
| P | P0A057 | DE | Potassium-translocating ATPase A chain 2;                                                                                                                                                                  |
| P | P0A057 | DE | Potassium-transporting ATPase A chain 2;                                                                                                                                                                   |
| P | P0A057 | DR | potassium-transporting ATPase activity                                                                                                                                                                     |
| P | P0A0D4 | CC | This system is involved in lactose transport (By similarity).                                                                                                                                              |
| P | P0A0D4 | DE | Lactose-specific phosphotransferase enzyme IIA component;                                                                                                                                                  |
| P | P0A0D4 | DE | PTS system lactose-specific EIIA component;                                                                                                                                                                |
| P | P0A0D6 | CC | This system is involved in lactose transport (By similarity).                                                                                                                                              |
| P | P0A0D6 | DE | Lactose-specific phosphotransferase enzyme IIA component;                                                                                                                                                  |
| P | P0A0D6 | DE | PTS system lactose-specific EIIA component;                                                                                                                                                                |
| P | P0A0D8 | CC | This system is involved in mannitol transport (By similarity).                                                                                                                                             |
| P | P0A0D8 | DE | Mannitol-specific phosphotransferase enzyme IIA component;                                                                                                                                                 |



|   |        |    |                                                                                                                                                                       |
|---|--------|----|-----------------------------------------------------------------------------------------------------------------------------------------------------------------------|
| P | P0A0D8 | DE | PTS system mannitol-specific EIIA component;                                                                                                                          |
| P | P0A0Y4 | CC | This protein may be a central component in the iron- acquisition system (By similarity)                                                                               |
| P | P0A0Y4 | DE | Iron(III) periplasmic-binding protein;                                                                                                                                |
| P | P0A0Y4 | DE | Major ferric iron-binding protein;                                                                                                                                    |
| P | P0A0Y4 | DE | Major iron-regulated protein;                                                                                                                                         |
| P | P0A283 | CC | This system is involved in glucose transport.                                                                                                                         |
| P | P0A283 | DE | Glucose-specific phosphotransferase enzyme IIA component;                                                                                                             |
| P | P0A283 | DE | PTS system glucose-specific EIIA component;                                                                                                                           |
| P | P0A284 | CC | This system is involved in glucose transport (By similarity).                                                                                                         |
| P | P0A284 | DE | Glucose-specific phosphotransferase enzyme IIA component;                                                                                                             |
| P | P0A284 | DE | PTS system glucose-specific EIIA component;                                                                                                                           |
| P | P0A2C5 | CC | Involved in the high-affinity D-ribose membrane transport system and also serves as the primary chemoreceptor for chemotaxis.                                         |
| P | P0A2C5 | DE | D-ribose-binding periplasmic protein;                                                                                                                                 |
| P | P0A2C6 | CC | Involved in the high-affinity D-ribose membrane transport system and also serves as the primary chemoreceptor for chemotaxis (By similarity).                         |
| P | P0A2C6 | DE | D-ribose-binding periplasmic protein;                                                                                                                                 |
| P | P0A2C7 | CC | Required for the activity of the bacterial periplasmic transport system of putrescine and spermidine                                                                  |
| P | P0A2C7 | CC | Required for the activity of the bacterial periplasmic transport system of putrescine and spermidine                                                                  |
| P | P0A2C7 | DE | Spermidine/putrescine-binding periplasmic protein;                                                                                                                    |
| P | P0A2C7 | DE | Spermidine/putrescine-binding periplasmic protein;                                                                                                                    |
| P | P0A2C8 | CC | Required for the activity of the bacterial periplasmic transport system of putrescine and spermidine                                                                  |
| P | P0A2C8 | CC | Required for the activity of the bacterial periplasmic transport system of putrescine and spermidine                                                                  |
| P | P0A2C8 | DE | Spermidine/putrescine-binding periplasmic protein;                                                                                                                    |
| P | P0A2C8 | DE | Spermidine/putrescine-binding periplasmic protein;                                                                                                                    |
| P | P0A2F8 | CC | Uptake of citrate across the boundary membrane with the concomitant uptake of a sodium ion (symport system) (By similarity).                                          |
| P | P0A2F8 | CC | Uptake of citrate across the boundary membrane with the concomitant uptake of a sodium ion (symport system) (By similarity).                                          |
| P | P0A2F8 | DE | Citrate carrier protein;                                                                                                                                              |
| P | P0A2F8 | DE | Citrate transporter;                                                                                                                                                  |
| P | P0A2F8 | DE | Citrate-sodium symporter;                                                                                                                                             |
| P | P0A2F9 | CC | Uptake of citrate across the boundary membrane with the concomitant uptake of a sodium ion (symport system) (By similarity).                                          |
| P | P0A2F9 | CC | Uptake of citrate across the boundary membrane with the concomitant uptake of a sodium ion (symport system) (By similarity).                                          |
| P | P0A2F9 | DE | Citrate carrier protein;                                                                                                                                              |
| P | P0A2F9 | DE | Citrate transporter;                                                                                                                                                  |
| P | P0A2F9 | DE | Citrate-sodium symporter;                                                                                                                                             |
| P | P0A2G3 | CC | Uptake of citrate across the boundary membrane with the concomitant transport of protons into the cell (symport system).                                              |
| P | P0A2G3 | DE | Citrate carrier protein;                                                                                                                                              |
| P | P0A2G3 | DE | Citrate transporter;                                                                                                                                                  |
| P | P0A2G3 | DE | Citrate utilization determinant;                                                                                                                                      |
| P | P0A2G3 | DE | Citrate utilization protein A;                                                                                                                                        |
| P | P0A2G3 | DE | Citrate-proton symporter;                                                                                                                                             |
| P | P0A2G4 | CC | Uptake of citrate across the boundary membrane with the concomitant transport of protons into the cell (symport system) (By similarity).                              |
| P | P0A2G4 | DE | Citrate carrier protein;                                                                                                                                              |
| P | P0A2G4 | DE | Citrate transporter;                                                                                                                                                  |
| P | P0A2G4 | DE | Citrate utilization determinant;                                                                                                                                      |
| P | P0A2G4 | DE | Citrate utilization protein A;                                                                                                                                        |
| P | P0A2G4 | DE | Citrate-proton symporter;                                                                                                                                             |
| P | P0A2I7 | CC | Part of the binding-protein-dependent transport system for histidine; probably responsible for the translocation of the substrate across the membrane.                |
| P | P0A2I7 | DE | Histidine transport system permease protein hisM;                                                                                                                     |
| P | P0A2I8 | CC | Part of the binding-protein-dependent transport system for histidine; probably responsible for the translocation of the substrate across the membrane (By similarity) |
| P | P0A2I8 | DE | Histidine transport system permease protein hisM;                                                                                                                     |
| P | P0A2I9 | CC | Part of the binding-protein-dependent transport system for histidine; probably responsible for the translocation of the substrate across the membrane.                |

|   |        |    |                                                                                                                                                                        |
|---|--------|----|------------------------------------------------------------------------------------------------------------------------------------------------------------------------|
| P | P0A2I9 | DE | Histidine transport system permease protein hisQ;                                                                                                                      |
| P | P0A2J0 | CC | Part of the binding-protein-dependent transport system for histidine; probably responsible for the translocation of the substrate across the membrane (By similarity). |
| P | P0A2J0 | DE | Histidine transport system permease protein hisQ;                                                                                                                      |
| P | P0A2J3 | CC | Involved in a peptide intake transport system that plays a role in the resistance to antimicrobial peptides.                                                           |
| P | P0A2J3 | DE | Peptide transport system permease protein sapB;                                                                                                                        |
| P | P0A2J4 | CC | Involved in a peptide intake transport system that plays a role in the resistance to antimicrobial peptides (By similarity).                                           |
| P | P0A2J4 | DE | Peptide transport system permease protein sapB;                                                                                                                        |
| P | P0A2J5 | CC | Involved in a peptide intake transport system that plays a role in the resistance to antimicrobial peptides.                                                           |
| P | P0A2J5 | DE | Peptide transport system permease protein sapC;                                                                                                                        |
| P | P0A2J6 | CC | Involved in a peptide intake transport system that plays a role in the resistance to antimicrobial peptides (By similarity).                                           |
| P | P0A2J6 | DE | Peptide transport system permease protein sapC;                                                                                                                        |
| P | P0A2J8 | CC | Required for the activity of the bacterial periplasmic transport system of putrescine and spermidine (By similarity).                                                  |
| P | P0A2J8 | CC | Required for the activity of the bacterial periplasmic transport system of putrescine and spermidine (By similarity).                                                  |
| P | P0A2J8 | DE | Spermidine/putrescine transport system permease protein PotB;                                                                                                          |
| P | P0A2J8 | DE | Spermidine/putrescine transport system permease protein PotB;                                                                                                          |
| P | P0A2R8 | CC | Mediates both influx and efflux of magnesium ions                                                                                                                      |
| P | P0A2R8 | DE | Magnesium transport protein CorA;                                                                                                                                      |
| P | P0A2R8 | DR | cobalt ion transmembrane transporter activity                                                                                                                          |
| P | P0A2R8 | DR | magnesium ion transmembrane transporter activity                                                                                                                       |
| P | P0A2R9 | CC | Mediates influx of magnesium ions (By similarity).                                                                                                                     |
| P | P0A2R9 | DE | Magnesium transport protein CorA;                                                                                                                                      |
| P | P0A2R9 | DR | cobalt ion transmembrane transporter activity                                                                                                                          |
| P | P0A2R9 | DR | magnesium ion transmembrane transporter activity                                                                                                                       |
| P | P0A2U6 | CC | Part of the ATP-driven transport system AdcABC for zinc                                                                                                                |
| P | P0A2U6 | DE | Zinc transport system ATP-binding protein AdcC;                                                                                                                        |
| P | P0A2U8 | DE | Oligopeptide transport ATP-binding protein AmiE;                                                                                                                       |
| P | P0A2V2 | CC | Component of the octopine active transport system probably consisting of four subunits: Q, M, P and T.                                                                 |
| P | P0A2V2 | DE | Octopine permease ATP-binding protein P;                                                                                                                               |
| P | P0A2V4 | DE | Oligopeptide transport ATP-binding protein OppF;                                                                                                                       |
| P | P0A2V5 | DE | Oligopeptide transport ATP-binding protein OppF;                                                                                                                       |
| P | P0A2V6 | DE | Oligopeptide transport ATP-binding protein OppF;                                                                                                                       |
| P | P0A2V8 | CC | Part of the ABC transporter complex PstSACB involved in phosphate import                                                                                               |
| P | P0A2V8 | DE | ABC phosphate transporter 3;                                                                                                                                           |
| P | P0A2V8 | DE | Phosphate import ATP-binding protein PstB 3;                                                                                                                           |
| P | P0A2V8 | DE | Phosphate-transporting ATPase 3;                                                                                                                                       |
| P | P0A2V8 | DR | inorganic phosphate transmembrane transporter activity                                                                                                                 |
| P | P0A2V8 | DR | phosphate transmembrane-transporting ATPase activity                                                                                                                   |
| P | P0A333 | DE | Voltage-gated potassium channel;                                                                                                                                       |
| P | P0A333 | DR | voltage-gated potassium channel activity                                                                                                                               |
| P | P0A3Q7 | CC | Glycerol enters the cell via the glycerol diffusion facilitator protein                                                                                                |
| P | P0A3Q7 | CC | This membrane protein facilitates the movement of glycerol across the cytoplasmic membrane (By similarity).                                                            |
| P | P0A3Q7 | DE | Glycerol uptake facilitator protein;                                                                                                                                   |
| P | P0A436 | CC | This system is involved in galactitol transport (By similarity).                                                                                                       |
| P | P0A436 | DE | Galactitol-specific phosphotransferase enzyme IIB component;                                                                                                           |
| P | P0A436 | DE | PTS system galactitol-specific EIIB component;                                                                                                                         |
| P | P0A437 | CC | This system is involved in galactitol transport (By similarity).                                                                                                       |
| P | P0A437 | DE | Galactitol-specific phosphotransferase enzyme IIB component;                                                                                                           |
| P | P0A437 | DE | PTS system galactitol-specific EIIB component;                                                                                                                         |
| P | P0A4F8 | CC | Component of the octopine active transport system probably consisting of four subunits: Q, M, P and T.                                                                 |
| P | P0A4F8 | DE | Octopine-binding periplasmic protein;                                                                                                                                  |
| P | P0A4G0 | CC | Part of the binding-protein-dependent transport system for oligopeptides; probably an oligopeptide binding protein.                                                    |
| P | P0A4G0 | DE | Oligopeptide-binding protein AliB;                                                                                                                                     |
| P | P0A4G2 | CC | Part of an ATP-driven transport system for manganese                                                                                                                   |
| P | P0A4G2 | DE | Manganese ABC transporter substrate-binding lipoprotein;                                                                                                               |

|   |        |    |                                                                                                                                                                       |
|---|--------|----|-----------------------------------------------------------------------------------------------------------------------------------------------------------------------|
| P | P0A4M7 | DE | Oligopeptide transport system permease protein AmiC;                                                                                                                  |
| P | P0A4M9 | DE | Oligopeptide transport system permease protein AmiD;                                                                                                                  |
| P | P0A4N5 | CC | Component of the octopine active transport system probably consisting of four subunits: Q, M, P and T.                                                                |
| P | P0A4N5 | DE | Octopine transport system permease protein occQ;                                                                                                                      |
| P | P0A4N7 | DE | Oligopeptide transport system permease protein oppB;                                                                                                                  |
| P | P0A4N8 | DE | Oligopeptide transport system permease protein oppB;                                                                                                                  |
| P | P0A4N9 | DE | Oligopeptide transport system permease protein oppC;                                                                                                                  |
| P | P0A4P0 | DE | Oligopeptide transport system permease protein oppC;                                                                                                                  |
| P | P0A4W1 | DE | L-asparagine permease 2;                                                                                                                                              |
| P | P0A4W1 | DE | L-asparagine transport protein 2;                                                                                                                                     |
| P | P0A4W2 | CC | part of the ABC transporter complex CysAW 1F involved in sulfate/inosulfate import                                                                                    |
| P | P0A4W2 | DE | Sulfate-transporting ATPase;                                                                                                                                          |
| P | P0A4W2 | DE | Sulfate/thiosulfate import ATP-binding protein CysA;                                                                                                                  |
| P | P0A4W2 | DR | sulfate transmembrane-transporting ATPase activity                                                                                                                    |
| P | P0A4W3 | CC | part of the ABC transporter complex CysAW 1F involved in sulfate/inosulfate import                                                                                    |
| P | P0A4W3 | DE | Sulfate-transporting ATPase;                                                                                                                                          |
| P | P0A4W3 | DE | Sulfate/thiosulfate import ATP-binding protein CysA;                                                                                                                  |
| P | P0A4W3 | DR | sulfate transmembrane-transporting ATPase activity                                                                                                                    |
| P | P0A5Y1 | CC | Involved in the transport of molybdenum into the cell                                                                                                                 |
| P | P0A5Y2 | CC | Part of the ABC transporter complex pstSACB involved in phosphate import (By similarity).                                                                             |
| P | P0A5Y2 | DE | Phosphate-binding protein pstS 3;                                                                                                                                     |
| P | P0A5Y2 | DR | inorganic phosphate transmembrane transporter activity                                                                                                                |
| P | P0A5Y3 | CC | Part of the ABC transporter complex pstSACB involved in phosphate import (By similarity).                                                                             |
| P | P0A5Y3 | DE | Phosphate-binding protein pstS 3;                                                                                                                                     |
| P | P0A5Y3 | DR | inorganic phosphate transmembrane transporter activity                                                                                                                |
| P | P0A625 | CC | part of the binding-protein-dependent transport system modABCD for molybdenum; probably responsible for the translocation of the substrate across the membrane        |
| P | P0A625 | DE | Molybdenum transport system permease protein modB;                                                                                                                    |
| P | P0A626 | CC | part of the binding-protein-dependent transport system for phosphate; probably responsible for the translocation of the substrate across the membrane (By similarity) |
| P | P0A626 | DE | Phosphate transport system permease protein pstA 2;                                                                                                                   |
| P | P0A626 | DR | inorganic phosphate transmembrane transporter activity                                                                                                                |
| P | P0A627 | CC | part of the binding-protein-dependent transport system for phosphate; probably responsible for the translocation of the substrate across the membrane (By similarity) |
| P | P0A627 | DE | Phosphate transport system permease protein pstA 2;                                                                                                                   |
| P | P0A627 | DR | inorganic phosphate transmembrane transporter activity                                                                                                                |
| P | P0A628 | CC | part of the binding-protein-dependent transport system for phosphate; probably responsible for the translocation of the substrate across the membrane (By similarity) |
| P | P0A628 | DE | Phosphate transport system permease protein pstC 1;                                                                                                                   |
| P | P0A628 | DR | inorganic phosphate transmembrane transporter activity                                                                                                                |
| P | P0A629 | CC | part of the binding-protein-dependent transport system for phosphate; probably responsible for the translocation of the substrate across the membrane (By similarity) |
| P | P0A629 | DE | Phosphate transport system permease protein pstC 1;                                                                                                                   |
| P | P0A629 | DR | inorganic phosphate transmembrane transporter activity                                                                                                                |
| P | P0A630 | CC | part of the binding-protein-dependent transport system for phosphate; probably responsible for the translocation of the substrate across the membrane (By similarity) |
| P | P0A630 | DE | Phosphate transport system permease protein pstC 2;                                                                                                                   |
| P | P0A630 | DR | inorganic phosphate transmembrane transporter activity                                                                                                                |
| P | P0A631 | CC | part of the binding-protein-dependent transport system for phosphate; probably responsible for the translocation of the substrate across the membrane (By similarity) |
| P | P0A631 | DE | Phosphate transport system permease protein pstC 2;                                                                                                                   |
| P | P0A631 | DR | inorganic phosphate transmembrane transporter activity                                                                                                                |
| P | P0A771 | CC | H <sup>+</sup> -stimulated, highly selective, manganese uptake system (By similarity).                                                                                |
| P | P0A771 | DE | Manganese transport protein mntH;                                                                                                                                     |
| P | P0A927 | DE | Nucleoside-specific channel-forming protein tsx;                                                                                                                      |
| P | P0A927 | DR | nucleoside transmembrane transporter activity                                                                                                                         |
| P | P0A9S7 | CC | Component of the leucine-specific transport system.                                                                                                                   |
| P | P0A9X1 | CC | Part of the ABC transporter complex ZnuABC involved in zinc import                                                                                                    |
| P | P0A9X1 | DE | Zinc import ATP-binding protein ZnuC;                                                                                                                                 |
| P | P0A9X1 | DR | zinc transporting ATPase activity                                                                                                                                     |
| P | P0A9X3 | CC | Part of the ABC transporter complex ZnuABC involved in zinc import                                                                                                    |
| P | P0A9X3 | DE | Zinc import ATP-binding protein ZnuC;                                                                                                                                 |

|   |        |    |                                                                                                                                                                  |
|---|--------|----|------------------------------------------------------------------------------------------------------------------------------------------------------------------|
| P | P0A9X3 | DR | zinc transporting ATPase activity                                                                                                                                |
| P | P0AA82 | CC | Required for cytosine transport into the cell.                                                                                                                   |
| P | P0AA82 | DE | Cytosine permease;                                                                                                                                               |
| P | P0AAD3 | CC | involved in transporting tryptophan across the cytoplasmic membrane (By similarity)                                                                              |
| P | P0AAD3 | DE | Tryptophan permease;                                                                                                                                             |
| P | P0AAD3 | DE | Tryptophan-specific transport protein;                                                                                                                           |
| P | P0AAD5 | CC | involved in transporting tyrosine across the cytoplasmic membrane (By similarity)                                                                                |
| P | P0AAD5 | DE | Tyrosine permease;                                                                                                                                               |
| P | P0AAD5 | DE | Tyrosine-specific transport protein;                                                                                                                             |
| P | P0AAD6 | CC | Involved in the import of serine into the cell                                                                                                                   |
| P | P0AAD6 | DE | Serine transporter;                                                                                                                                              |
| P | P0AAD7 | CC | Involved in the import of serine into the cell                                                                                                                   |
| P | P0AAD7 | DE | Serine transporter;                                                                                                                                              |
| P | P0AAD8 | DE | H <sup>+</sup> /threonine-serine symporter;                                                                                                                      |
| P | P0AAD9 | CC | Involved in the import of threonine and serine into the cell, with the concomitant import of a proton (symport system) (By similarity).                          |
| P | P0AAD9 | DE | Threonine/serine transporter TdcC;                                                                                                                               |
| P | P0AAE1 | CC | Permease that is involved in the transport across the cytoplasmic membrane of D-alanine, D-serine and glycine (By similarity).                                   |
| P | P0AAE1 | CC | Permease that is involved in the transport across the cytoplasmic membrane of D-alanine, D-serine and glycine (By similarity).                                   |
| P | P0AAE1 | CC | Permease that is involved in the transport across the cytoplasmic membrane of D-alanine, D-serine and glycine (By similarity).                                   |
| P | P0AAE1 | DE | D-serine/D-alanine/glycine transporter;                                                                                                                          |
| P | P0AAE1 | DE | D-serine/D-alanine/glycine transporter;                                                                                                                          |
| P | P0AAE1 | DE | D-serine/D-alanine/glycine transporter;                                                                                                                          |
| P | P0AAE7 | CC | Catalyzes an electroneutral exchange between arginine and ornithine to allow high-efficiency energy conversion in the arginine deiminase pathway (By similarity) |
| P | P0AAE7 | CC | Catalyzes an electroneutral exchange between arginine and ornithine to allow high-efficiency energy conversion in the arginine deiminase pathway (By similarity) |
| P | P0AAE7 | DE | Putative arginine/ornithine antiporter;                                                                                                                          |
| P | P0AAE7 | DE | Putative arginine/ornithine antiporter;                                                                                                                          |
| P | P0AAE8 | CC | Probable cadaverine/lysine antiporter or part of it.                                                                                                             |
| P | P0AAE8 | CC | Probable cadaverine/lysine antiporter or part of it.                                                                                                             |
| P | P0AAE8 | DE | Probable cadaverine/lysine antiporter;                                                                                                                           |
| P | P0AAE8 | DE | Probable cadaverine/lysine antiporter;                                                                                                                           |
| P | P0AAF0 | CC | Probable cadaverine/lysine antiporter or part of it (By similarity).                                                                                             |
| P | P0AAF0 | CC | Probable cadaverine/lysine antiporter or part of it (By similarity).                                                                                             |
| P | P0AAF0 | DE | Probable cadaverine/lysine antiporter;                                                                                                                           |
| P | P0AAF0 | DE | Probable cadaverine/lysine antiporter;                                                                                                                           |
| P | P0AAF1 | CC | Probable putrescine-ornithine antiporter.                                                                                                                        |
| P | P0AAF1 | DE | Putrescine transport protein;                                                                                                                                    |
| P | P0AAF1 | DE | Putrescine-ornithine antiporter;                                                                                                                                 |
| P | P0AAF5 | DR | L-arabinose-importing ATPase activity                                                                                                                            |
| P | P0AAF6 | CC | Part of the ABC transporter complex ArtPIQMJ involved in arginine transport                                                                                      |
| P | P0AAF6 | DE | Arginine transport ATP-binding protein ArtP;                                                                                                                     |
| P | P0AAF8 | CC | Part of the ABC transporter complex ArtPIQMJ involved in arginine transport                                                                                      |
| P | P0AAF8 | DE | Arginine transport ATP-binding protein ArtP;                                                                                                                     |
| P | P0AAF9 | CC | Part of the ABC transporter complex ArtPIQMJ involved in arginine transport                                                                                      |
| P | P0AAF9 | DE | Arginine transport ATP-binding protein ArtP;                                                                                                                     |
| P | P0AAG1 | DE | Dipeptide transport ATP-binding protein DppD;                                                                                                                    |
| P | P0AAG2 | DE | Dipeptide transport ATP-binding protein DppD;                                                                                                                    |
| P | P0AAG3 | CC | Part of the binding-protein-dependent transport system for glutamate and aspartate                                                                               |
| P | P0AAG3 | CC | Part of the binding-protein-dependent transport system for glutamate and aspartate                                                                               |
| P | P0AAG3 | DE | Glutamate/aspartate transport ATP-binding protein GltL;                                                                                                          |
| P | P0AAG3 | DE | Glutamate/aspartate transport ATP-binding protein GltL;                                                                                                          |
| P | P0AAG4 | CC | Part of the binding-protein-dependent transport system for glutamate and aspartate                                                                               |
| P | P0AAG4 | CC | Part of the binding-protein-dependent transport system for glutamate and aspartate                                                                               |
| P | P0AAG4 | DE | Glutamate/aspartate transport ATP-binding protein GltL;                                                                                                          |
| P | P0AAG4 | DE | Glutamate/aspartate transport ATP-binding protein GltL;                                                                                                          |
| P | P0AAG8 | CC | Part of the ABC transporter complex MglABC involved in galactose/methyl galactoside import                                                                       |
| P | P0AAG8 | DE | Galactose/methyl galactoside import ATP-binding protein MglA;                                                                                                    |
| P | P0AAG9 | CC | Part of the ABC transporter complex MglABC involved in galactose/methyl galactoside import                                                                       |

|   |        |    |                                                                                                                              |
|---|--------|----|------------------------------------------------------------------------------------------------------------------------------|
| P | P0AAG9 | DE | Galactose/methyl galactoside import ATP-binding protein MglA;                                                                |
| P | P0AAH0 | CC | Part of the ABC transporter complex PstSACB involved in phosphate import                                                     |
| P | P0AAH0 | DE | ABC phosphate transporter;                                                                                                   |
| P | P0AAH0 | DE | Phosphate import ATP-binding protein PstB;                                                                                   |
| P | P0AAH0 | DE | Phosphate-transporting ATPase;                                                                                               |
| P | P0AAH0 | DR | inorganic phosphate transmembrane transporter activity                                                                       |
| P | P0AAH0 | DR | phosphate transmembrane-transporting ATPase activity                                                                         |
| P | P0AAH2 | CC | Part of the ABC transporter complex PstSACB involved in phosphate import                                                     |
| P | P0AAH2 | DE | ABC phosphate transporter;                                                                                                   |
| P | P0AAH2 | DE | Phosphate import ATP-binding protein PstB;                                                                                   |
| P | P0AAH2 | DE | Phosphate-transporting ATPase;                                                                                               |
| P | P0AAH2 | DR | inorganic phosphate transmembrane transporter activity                                                                       |
| P | P0AAH2 | DR | phosphate transmembrane-transporting ATPase activity                                                                         |
| P | P0AAH3 | CC | Part of the ABC transporter complex PstSACB involved in phosphate import                                                     |
| P | P0AAH3 | DE | ABC phosphate transporter;                                                                                                   |
| P | P0AAH3 | DE | Phosphate import ATP-binding protein PstB;                                                                                   |
| P | P0AAH3 | DE | Phosphate-transporting ATPase;                                                                                               |
| P | P0AAH3 | DR | inorganic phosphate transmembrane transporter activity                                                                       |
| P | P0AAH3 | DR | phosphate transmembrane-transporting ATPase activity                                                                         |
| P | P0AAH6 | CC | Involved in a peptide intake transport system that plays a role in the resistance to antimicrobial peptides (By similarity). |
| P | P0AAH6 | DE | Peptide transport system ATP-binding protein SapD;                                                                           |
| P | P0AAH6 | DR | peptide transporter activity                                                                                                 |
| P | P0AAH7 | CC | Involved in a peptide intake transport system that plays a role in the resistance to antimicrobial peptides (By similarity). |
| P | P0AAH7 | DE | Peptide transport system ATP-binding protein SapD;                                                                           |
| P | P0AAH7 | DR | peptide transporter activity                                                                                                 |
| P | P0AAI0 | CC | Involved in a peptide intake transport system that plays a role in the resistance to antimicrobial peptides (By similarity). |
| P | P0AAI0 | DE | Peptide transport system ATP-binding protein SapF;                                                                           |
| P | P0AB93 | CC | Thought to form the channel of an arsenite pump (By similarity).                                                             |
| P | P0AB93 | DR | arsenite secondary active transmembrane transporter activity                                                                 |
| P | P0AB94 | CC | Thought to form the channel of an arsenite pump (By similarity).                                                             |
| P | P0AB94 | DR | arsenite transmembrane transporter activity                                                                                  |
| P | P0AB95 | CC | Thought to form the channel of an arsenite pump (By similarity).                                                             |
| P | P0AB95 | DR | arsenite transmembrane transporter activity                                                                                  |
| P | P0ABC9 | CC | High-affinity uptake of choline driven by a proton- motive force.                                                            |
| P | P0ABC9 | DE | High-affinity choline transport protein;                                                                                     |
| P | P0ABD0 | CC | High-affinity uptake of choline driven by a proton- motive force (By similarity).                                            |
| P | P0ABD0 | DE | High-affinity choline transport protein;                                                                                     |
| P | P0ABI6 | CC | Mediates influx of magnesium ions (By similarity).                                                                           |
| P | P0ABI6 | DE | Magnesium transport protein CorA;                                                                                            |
| P | P0ABI6 | DR | cobalt ion transmembrane transporter activity                                                                                |
| P | P0ABI6 | DR | magnesium ion transmembrane transporter activity                                                                             |
| P | P0ABI7 | CC | Mediates influx of magnesium ions (By similarity).                                                                           |
| P | P0ABI7 | DE | Magnesium transport protein CorA;                                                                                            |
| P | P0ABI7 | DR | cobalt ion transmembrane transporter activity                                                                                |
| P | P0ABI7 | DR | magnesium ion transmembrane transporter activity                                                                             |
| P | P0ABM0 | CC | Required for the export of heme to the periplasm for the biogenesis of c-type cytochromes (By similarity).                   |
| P | P0ABM0 | DE | Heme exporter protein B;                                                                                                     |
| P | P0ABM0 | DR | heme transporter activity                                                                                                    |
| P | P0ABM3 | CC | Required for the export of heme to the periplasm for the biogenesis of c-type cytochromes (By similarity).                   |
| P | P0ABM3 | DE | Heme exporter protein C;                                                                                                     |
| P | P0ABM3 | DR | heme transporter activity                                                                                                    |
| P | P0ABM4 | CC | Required for the export of heme to the periplasm for the biogenesis of c-type cytochromes (By similarity).                   |
| P | P0ABM4 | DE | Heme exporter protein C;                                                                                                     |
| P | P0ABM4 | DR | heme transporter activity                                                                                                    |
| P | P0AC23 | CC | Involved in the bidirectional transport of formate.                                                                          |
| P | P0AC23 | DE | Formate channel 1;                                                                                                           |
| P | P0AC23 | DE | Probable formate transporter 1;                                                                                              |
| P | P0AC23 | DR | formate transmembrane transporter activity                                                                                   |
| P | P0AC25 | CC | Involved in the bidirectional transport of formate (By similarity).                                                          |

|   |        |    |                                                                                                                                                                                    |
|---|--------|----|------------------------------------------------------------------------------------------------------------------------------------------------------------------------------------|
| P | P0AC25 | DE | Formate channel 1;                                                                                                                                                                 |
| P | P0AC25 | DE | Probable formate transporter 1;                                                                                                                                                    |
| P | P0AC26 | DE | Probable nitrite transporter;                                                                                                                                                      |
| P | P0AC26 | DR | nitrite uptake transmembrane transporter activity                                                                                                                                  |
| P | P0AC27 | DE | Probable nitrite transporter;                                                                                                                                                      |
|   |        |    | This protein is a component of the leucine, isoleucine, valine, (threonine)                                                                                                        |
| P | P0AD96 | CC | transport system, which is one of the two periplasmic binding protein-dependent transport systems of the high-affinity transport of the branched-chain amino acids                 |
|   |        |    | This protein is a component of the leucine, isoleucine, valine, (threonine)                                                                                                        |
| P | P0AD96 | CC | transport system, which is one of the two periplasmic binding protein-dependent transport systems of the high-affinity transport of the branched-chain amino acids                 |
|   |        |    | This protein is a component of the leucine, isoleucine, valine, (threonine)                                                                                                        |
| P | P0AD96 | CC | transport system, which is one of the two periplasmic binding protein-dependent transport systems of the high-affinity transport of the branched-chain amino acids                 |
|   |        |    | This protein is a component of the leucine, isoleucine, valine, (threonine)                                                                                                        |
| P | P0AD98 | CC | transport system, which is one of the two periplasmic binding protein-dependent transport systems of the high-affinity transport of the branched-chain amino acids (By similarity) |
| P | P0AE27 | CC | Part of the binding-protein-dependent transport system for L-arabinose                                                                                                             |
| P | P0AE27 | DE | L-arabinose transport system permease protein AraH;                                                                                                                                |
| P | P0AE30 | CC | Part of the ABC transporter complex ArtPIQMJ involved in arginine transport                                                                                                        |
| P | P0AE30 | DE | Arginine ABC transporter permease protein ArtM;                                                                                                                                    |
| P | P0AE32 | CC | Part of the ABC transporter complex ArtPIQMJ involved in arginine transport                                                                                                        |
| P | P0AE32 | DE | Arginine ABC transporter permease protein ArtM;                                                                                                                                    |
| P | P0AE33 | CC | Part of the ABC transporter complex ArtPIQMJ involved in arginine transport                                                                                                        |
| P | P0AE33 | DE | Arginine ABC transporter permease protein ArtM;                                                                                                                                    |
| P | P0AE34 | CC | Part of the ABC transporter complex ArtPIQMJ involved in arginine transport                                                                                                        |
| P | P0AE34 | DE | Arginine ABC transporter permease protein ArtQ;                                                                                                                                    |
| P | P0AE36 | CC | Part of the ABC transporter complex ArtPIQMJ involved in arginine transport                                                                                                        |
| P | P0AE36 | DE | Arginine ABC transporter permease protein ArtQ;                                                                                                                                    |
| P | P0AE74 | CC | Responsible for the uptake of citrate in exchange to the efflux of succinate                                                                                                       |
| P | P0AE74 | DE | Citrate carrier;                                                                                                                                                                   |
| P | P0AE74 | DE | Citrate transporter;                                                                                                                                                               |
| P | P0AE74 | DE | Citrate/succinate antiporter;                                                                                                                                                      |
| P | P0AE75 | CC | Responsible for the uptake of citrate in exchange to the efflux of succinate                                                                                                       |
| P | P0AE75 | CC | Responsible for the uptake of citrate in exchange to the efflux of succinate                                                                                                       |
| P | P0AE75 | DE | Citrate carrier;                                                                                                                                                                   |
| P | P0AE75 | DE | Citrate transporter;                                                                                                                                                               |
| P | P0AE75 | DE | Citrate/succinate antiporter;                                                                                                                                                      |
| P | P0AE75 | DE | Citrate/succinate antiporter;                                                                                                                                                      |
| P | P0AEB0 | CC | Part of the ABC transporter complex CysAWTP (TC 3.A.1.6.1) involved in sulfate/thiosulfate import                                                                                  |
| P | P0AEB0 | CC | Part of the ABC transporter complex CysAWTP (TC 3.A.1.6.1) involved in sulfate/thiosulfate import                                                                                  |
| P | P0AEB0 | DE | Sulfate transport system permease protein CysW;                                                                                                                                    |
| P | P0AEB0 | DR | sulfate transmembrane transporter activity                                                                                                                                         |
| P | P0AEE5 | CC | This protein is involved in the active transport of galactose and glucose                                                                                                          |
| P | P0AEE7 | CC | This protein is involved in the active transport of galactose and glucose                                                                                                          |
| P | P0AEG0 | DE | Dipeptide transport system permease protein dppB;                                                                                                                                  |
| P | P0AEG3 | DE | Dipeptide transport system permease protein dppC;                                                                                                                                  |
| P | P0AEM9 | CC | Part of a binding-protein-dependent transport system for cystine.                                                                                                                  |
| P | P0AEM9 | DE | Cystine-binding periplasmic protein;                                                                                                                                               |
| P | P0AEP1 | CC | Uptake of galactose across the boundary membrane with the concomitant transport of protons into the cell (symport system).                                                         |
| P | P0AEP1 | DE | Galactose transporter;                                                                                                                                                             |
| P | P0AEP1 | DE | Galactose-proton symporter;                                                                                                                                                        |
| P | P0AEP1 | DR | galactose:hydrogen symporter activity                                                                                                                                              |
| P | P0AEQ3 | CC | Involved in a glutamine-transport system glnHPQ.                                                                                                                                   |
| P | P0AEQ3 | DE | Glutamine-binding periplasmic protein;                                                                                                                                             |
| P | P0AEQ6 | CC | Part of the binding-protein-dependent transport system for glutamine; probably responsible for the translocation of the substrate across the membrane.                             |
| P | P0AEQ6 | DE | Glutamine transport system permease protein glnP;                                                                                                                                  |
|   |        |    | Part of the binding-protein-dependent transport system for glutamine; probably responsible for the translocation of the substrate across the membrane (By similarity)              |
| P | P0AEQ8 | CC | responsible for the translocation of the substrate across the membrane (By similarity)                                                                                             |
| P | P0AEQ8 | DE | Glutamine transport system permease protein glnP;                                                                                                                                  |

|   |        |    |                                                                                                                                                                                                                                                                                                                                                   |
|---|--------|----|---------------------------------------------------------------------------------------------------------------------------------------------------------------------------------------------------------------------------------------------------------------------------------------------------------------------------------------------------|
| P | P0AEQ9 | CC | Part of the binding-protein-dependent transport system for glutamine; probably responsible for the translocation of the substrate across the membrane (By similarity)                                                                                                                                                                             |
| P | P0AEQ9 | DE | Glutamine transport system permease protein glnP;                                                                                                                                                                                                                                                                                                 |
| P | P0AER2 | CC | Transporter of glycerol across the cytoplasmic membrane, with limited permeability to water and small uncharged compounds such as polyols (By similarity)                                                                                                                                                                                         |
| P | P0AER2 | DE | Glycerol uptake facilitator protein;                                                                                                                                                                                                                                                                                                              |
| P | P0AER3 | CC | Part of the binding-protein-dependent transport system for aspartate/glutamate; probably responsible for the translocation of the substrate across the membrane.                                                                                                                                                                                  |
| P | P0AER3 | CC | Part of the binding-protein-dependent transport system for aspartate/glutamate; probably responsible for the translocation of the substrate across the membrane.                                                                                                                                                                                  |
| P | P0AER3 | DE | Glutamate/aspartate transport system permease protein gltJ;                                                                                                                                                                                                                                                                                       |
| P | P0AER3 | DE | Glutamate/aspartate transport system permease protein gltJ;                                                                                                                                                                                                                                                                                       |
| P | P0AER5 | CC | Part of the binding-protein-dependent transport system for aspartate/glutamate; probably responsible for the translocation of the substrate across the membrane.                                                                                                                                                                                  |
| P | P0AER5 | CC | Part of the binding-protein-dependent transport system for aspartate/glutamate; probably responsible for the translocation of the substrate across the membrane.                                                                                                                                                                                  |
| P | P0AER5 | DE | Glutamate/aspartate transport system permease protein gltK;                                                                                                                                                                                                                                                                                       |
| P | P0AER5 | DE | Glutamate/aspartate transport system permease protein gltK;                                                                                                                                                                                                                                                                                       |
| P | P0AER7 | CC | Part of the binding-protein-dependent transport system for aspartate/glutamate; probably responsible for the translocation of the substrate across the membrane (Part of the binding-protein-dependent transport system for aspartate/glutamate; probably responsible for the translocation of the substrate across the membrane (By similarity)) |
| P | P0AER7 | CC | Part of the binding-protein-dependent transport system for aspartate/glutamate; probably responsible for the translocation of the substrate across the membrane (By similarity)                                                                                                                                                                   |
| P | P0AER7 | DE | Glutamate/aspartate transport system permease protein gltK;                                                                                                                                                                                                                                                                                       |
| P | P0AER7 | DE | Glutamate/aspartate transport system permease protein gltK;                                                                                                                                                                                                                                                                                       |
| P | P0AER8 | CC | Catalyzes the sodium-dependent uptake of extracellular glutamate.                                                                                                                                                                                                                                                                                 |
| P | P0AER8 | CC | Catalyzes the sodium-dependent uptake of extracellular glutamate.                                                                                                                                                                                                                                                                                 |
| P | P0AER8 | DE | Glutamate permease;                                                                                                                                                                                                                                                                                                                               |
| P | P0AER8 | DE | Sodium/glutamate symport carrier protein;                                                                                                                                                                                                                                                                                                         |
| P | P0AER8 | DE | Sodium/glutamate symport carrier protein;                                                                                                                                                                                                                                                                                                         |
| P | P0AER8 | DR | glutamate:sodium symporter activity                                                                                                                                                                                                                                                                                                               |
| P | P0AER8 | DR | glutamate:sodium symporter activity                                                                                                                                                                                                                                                                                                               |
| P | P0AER9 | CC | Catalyzes the sodium-dependent uptake of extracellular glutamate (By similarity).                                                                                                                                                                                                                                                                 |
| P | P0AER9 | CC | Catalyzes the sodium-dependent uptake of extracellular glutamate (By similarity).                                                                                                                                                                                                                                                                 |
| P | P0AER9 | DE | Glutamate permease;                                                                                                                                                                                                                                                                                                                               |
| P | P0AER9 | DE | Sodium/glutamate symport carrier protein;                                                                                                                                                                                                                                                                                                         |
| P | P0AER9 | DE | Sodium/glutamate symport carrier protein;                                                                                                                                                                                                                                                                                                         |
| P | P0AER9 | DR | glutamate:sodium symporter activity                                                                                                                                                                                                                                                                                                               |
| P | P0AER9 | DR | glutamate:sodium symporter activity                                                                                                                                                                                                                                                                                                               |
| P | P0AEU2 | CC | Component of the high-affinity histidine permease, a binding-protein-dependent transport system                                                                                                                                                                                                                                                   |
| P | P0AEU2 | DE | Histidine-binding periplasmic protein;                                                                                                                                                                                                                                                                                                            |
| P | P0AEU5 | CC | Part of the binding-protein-dependent transport system for histidine; probably responsible for the translocation of the substrate across the membrane (By similarity)                                                                                                                                                                             |
| P | P0AEU5 | DE | Histidine transport system permease protein hisM;                                                                                                                                                                                                                                                                                                 |
| P | P0AEU6 | CC | Part of the binding-protein-dependent transport system for histidine; probably responsible for the translocation of the substrate across the membrane (By similarity)                                                                                                                                                                             |
| P | P0AEU6 | DE | Histidine transport system permease protein hisM;                                                                                                                                                                                                                                                                                                 |
| P | P0AEX9 | CC | Involved in the high-affinity maltose membrane transport system malEFGK                                                                                                                                                                                                                                                                           |
| P | P0AEX9 | DE | Maltose-binding periplasmic protein;                                                                                                                                                                                                                                                                                                              |
| P | P0AEX9 | DR | maltose transmembrane transporter activity                                                                                                                                                                                                                                                                                                        |
| P | P0AEY0 | CC | Involved in the high-affinity maltose membrane transport system malEFGK                                                                                                                                                                                                                                                                           |
| P | P0AEY0 | DE | Maltose-binding periplasmic protein;                                                                                                                                                                                                                                                                                                              |
| P | P0AEY0 | DR | maltose transmembrane transporter activity                                                                                                                                                                                                                                                                                                        |
| P | P0AF01 | DR | molybdate ion transmembrane transporter activity                                                                                                                                                                                                                                                                                                  |
| P | P0AF02 | CC | Part of the binding-protein-dependent transport system for molybdenum; probably responsible for the translocation of the substrate across the membrane (By similarity)                                                                                                                                                                            |
| P | P0AF02 | DE | Molybdenum transport system permease protein modB;                                                                                                                                                                                                                                                                                                |
| P | P0AFA7 | CC | Catalyzes the exchange of 3 H <sup>+</sup> per 2 Na <sup>+</sup>                                                                                                                                                                                                                                                                                  |
| P | P0AFA7 | CC | Catalyzes the exchange of 3 H <sup>+</sup> per 2 Na <sup>+</sup>                                                                                                                                                                                                                                                                                  |
| P | P0AFA7 | CC | Has a high affinity for sodium, but can also transport lithium                                                                                                                                                                                                                                                                                    |
| P | P0AFA7 | CC | Na <sup>+</sup> /H <sup>+</sup> antiporter that extrudes sodium in exchange for external protons                                                                                                                                                                                                                                                  |
| P | P0AFA7 | CC | Na <sup>+</sup> /H <sup>+</sup> antiporter that extrudes sodium in exchange for external protons                                                                                                                                                                                                                                                  |
| P | P0AFA7 | DE | Na <sup>+</sup> /H <sup>+</sup> antiporter nhaB;                                                                                                                                                                                                                                                                                                  |
| P | P0AFA7 | DE | Na <sup>+</sup> /H <sup>+</sup> antiporter nhaB;                                                                                                                                                                                                                                                                                                  |
| P | P0AFA7 | DE | Sodium/proton antiporter nhaB;                                                                                                                                                                                                                                                                                                                    |

|   |        |    |                                                                                                                           |
|---|--------|----|---------------------------------------------------------------------------------------------------------------------------|
| P | P0AFA7 | DR | sodium:hydrogen antiporter activity                                                                                       |
| P | P0AFA8 | CC | Na <sup>+</sup> /H <sup>+</sup> antiporter that extrudes sodium in exchange for external protons (By similarity)          |
| P | P0AFA8 | DE | Na <sup>+</sup> /H <sup>+</sup> antiporter nhaB;                                                                          |
| P | P0AFA8 | DE | Sodium/proton antiporter nhaB;                                                                                            |
| P | P0AFA8 | DR | sodium:hydrogen antiporter activity                                                                                       |
| P | P0AFA9 | CC | Involved in a nickel transport system, probably translocates nickel through the bacterial inner membrane.                 |
| P | P0AFA9 | DE | Nickel transport system permease protein nikC;                                                                            |
| P | P0AFB0 | CC | Involved in a nickel transport system, probably translocates nickel through the bacterial inner membrane (By similarity). |
| P | P0AFB0 | DE | Nickel transport system permease protein nikC;                                                                            |
| P | P0AFF2 | DE | Nucleoside permease nupC;                                                                                                 |
| P | P0AFF2 | DE | Nucleoside-transport system protein nupC;                                                                                 |
| P | P0AFF2 | DR | nucleoside:sodium symporter activity                                                                                      |
| P | P0AFF4 | DE | Nucleoside permease nupG;                                                                                                 |
| P | P0AFF4 | DE | Nucleoside-transport system protein nupG;                                                                                 |
| P | P0AFH4 | DE | Oligopeptide transport system permease protein oppB;                                                                      |
| P | P0AFH5 | DE | Oligopeptide transport system permease protein oppB;                                                                      |
| P | P0AFH7 | DE | Oligopeptide transport system permease protein oppC;                                                                      |
| P | P0AFJ9 | CC | Low-affinity inorganic phosphate transport                                                                                |
| P | P0AFJ9 | DE | Low-affinity inorganic phosphate transporter 1;                                                                           |
| P | P0AFJ9 | DR | inorganic phosphate transmembrane transporter activity                                                                    |
| P | P0AFK4 | CC | Required for the activity of the bacterial periplasmic transport system of putrescine and spermidine.                     |
| P | P0AFK4 | CC | Required for the activity of the bacterial periplasmic transport system of putrescine and spermidine.                     |
| P | P0AFK4 | DE | Spermidine/putrescine transport system permease protein PotB;                                                             |
| P | P0AFK4 | DE | Spermidine/putrescine transport system permease protein PotB;                                                             |
| P | P0AFK4 | DR | polyamine-transporting ATPase activity                                                                                    |
| P | P0AFK5 | CC | Required for the activity of the bacterial periplasmic transport system of putrescine and spermidine (By similarity).     |
| P | P0AFK5 | CC | Required for the activity of the bacterial periplasmic transport system of putrescine and spermidine (By similarity).     |
| P | P0AFK5 | DE | Spermidine/putrescine transport system permease protein PotB;                                                             |
| P | P0AFK5 | DE | Spermidine/putrescine transport system permease protein PotB;                                                             |
| P | P0AFK6 | CC | Required for the activity of the bacterial periplasmic transport system of putrescine and spermidine.                     |
| P | P0AFK6 | CC | Required for the activity of the bacterial periplasmic transport system of putrescine and spermidine.                     |
| P | P0AFK6 | DE | Spermidine/putrescine transport system permease protein PotC;                                                             |
| P | P0AFK6 | DE | Spermidine/putrescine transport system permease protein PotC;                                                             |
| P | P0AFK6 | DR | polyamine-transporting ATPase activity                                                                                    |
| P | P0AFK8 | CC | Required for the activity of the bacterial periplasmic transport system of putrescine and spermidine (By similarity).     |
| P | P0AFK8 | CC | Required for the activity of the bacterial periplasmic transport system of putrescine and spermidine (By similarity).     |
| P | P0AFK8 | DE | Spermidine/putrescine transport system permease protein PotC;                                                             |
| P | P0AFK8 | DE | Spermidine/putrescine transport system permease protein PotC;                                                             |
| P | P0AFK9 | CC | Polyamine binding protein.                                                                                                |
| P | P0AFK9 | CC | Required for the activity of the bacterial periplasmic transport system of putrescine and spermidine                      |
| P | P0AFK9 | CC | Required for the activity of the bacterial periplasmic transport system of putrescine and spermidine                      |
| P | P0AFK9 | DE | Spermidine/putrescine-binding periplasmic protein;                                                                        |
| P | P0AFK9 | DE | Spermidine/putrescine-binding periplasmic protein;                                                                        |
| P | P0AFK9 | DR | polyamine-transporting ATPase activity                                                                                    |
| P | P0AFL0 | CC | Required for the activity of the bacterial periplasmic transport system of putrescine and spermidine                      |
| P | P0AFL0 | CC | Required for the activity of the bacterial periplasmic transport system of putrescine and spermidine                      |
| P | P0AFL0 | DE | Spermidine/putrescine-binding periplasmic protein;                                                                        |
| P | P0AFL0 | DE | Spermidine/putrescine-binding periplasmic protein;                                                                        |
| P | P0AFL1 | CC | Required for the activity of the bacterial periplasmic transport system of putrescine                                     |
| P | P0AFL1 | DE | Putrescine transport system permease protein PotI;                                                                        |
| P | P0AFL1 | DR | putrescine-importing ATPase activity                                                                                      |



|   |        |    |                                                                                                                                                                         |
|---|--------|----|-------------------------------------------------------------------------------------------------------------------------------------------------------------------------|
| P | P0AFM2 | CC | Member of a multicomponent binding-protein-dependent transport system (the proU transporter) which serves as the glycine betaine/L-proline transporter.                 |
| P | P0AFM2 | DE | Glycine betaine-binding periplasmic protein;                                                                                                                            |
| P | P0AFM3 | CC | Member of a multicomponent binding-protein-dependent transport system (the proU transporter) which serves as the glycine betaine/L-proline transporter (By similarity). |
| P | P0AFR3 | CC | Possible sulfate transporter (By similarity).                                                                                                                           |
| P | P0AFR3 | DE | Putative sulfate transporter ychM;                                                                                                                                      |
| P | P0AFR3 | DR | secondary active sulfate transmembrane transporter activity                                                                                                             |
| P | P0AFZ8 | CC | Interacts with trk system potassium uptake protein trkA and requires trkE for transport activity (By similarity).                                                       |
| P | P0AFZ8 | CC | Low-affinity potassium transport system                                                                                                                                 |
| P | P0AFZ8 | DE | Trk system potassium uptake protein trkH;                                                                                                                               |
| P | P0AFZ9 | CC | Interacts with trk system potassium uptake protein trkA and requires trkE for transport activity (By similarity).                                                       |
| P | P0AFZ9 | CC | Low-affinity potassium transport system                                                                                                                                 |
| P | P0AFZ9 | DE | Trk system potassium uptake protein trkH;                                                                                                                               |
| P | P0AG34 | CC | Conducts the efflux of homoserine and homoserine lactone.                                                                                                               |
| P | P0AG34 | DE | Homoserine/homoserine lactone efflux protein;                                                                                                                           |
| P | P0AG36 | CC | Conducts the efflux of homoserine and homoserine lactone (By similarity).                                                                                               |
| P | P0AG36 | DE | Homoserine/homoserine lactone efflux protein;                                                                                                                           |
| P | P0AG37 | CC | Conducts the efflux of homoserine and homoserine lactone (By similarity).                                                                                               |
| P | P0AG37 | DE | Homoserine/homoserine lactone efflux protein;                                                                                                                           |
| P | P0AG78 | CC | This protein specifically binds sulfate and is involved in its transmembrane transport                                                                                  |
| P | P0AG78 | DE | Sulfate starvation-induced protein 2;                                                                                                                                   |
| P | P0AG78 | DE | Sulfate-binding protein;                                                                                                                                                |
| P | P0AG78 | DR | secondary active sulfate transmembrane transporter activity                                                                                                             |
| P | P0AG78 | DR | sulfate transmembrane-transporting ATPase activity                                                                                                                      |
| P | P0AG79 | CC | This protein specifically binds sulfate and is involved in its transmembrane transport (By similarity).                                                                 |
| P | P0AG79 | DE | Sulfate starvation-induced protein 2;                                                                                                                                   |
| P | P0AG79 | DE | Sulfate-binding protein;                                                                                                                                                |
| P | P0AG79 | DR | secondary active sulfate transmembrane transporter activity                                                                                                             |
| P | P0AG79 | DR | sulfate transmembrane-transporting ATPase activity                                                                                                                      |
| P | P0AG82 | CC | Part of the ABC transporter complex pstSACB involved in phosphate import.                                                                                               |
| P | P0AG82 | DE | Phosphate-binding protein pstS;                                                                                                                                         |
| P | P0AG82 | DR | inorganic phosphate transmembrane transporter activity                                                                                                                  |
| P | P0AG83 | CC | Part of the ABC transporter complex pstSACB involved in phosphate import (By similarity).                                                                               |
| P | P0AG83 | DE | Phosphate-binding protein pstS;                                                                                                                                         |
| P | P0AG83 | DR | inorganic phosphate transmembrane transporter activity                                                                                                                  |
| P | P0AGC0 | CC | Transport protein for sugar phosphate uptake.                                                                                                                           |
| P | P0AGC0 | DE | Hexose phosphate transport protein;                                                                                                                                     |
| P | P0AGC0 | DR | hexose-phosphate:inorganic phosphate antiporter activity                                                                                                                |
| P | P0AGC0 | DR | hexose-phosphate:inorganic phosphate antiporter activity                                                                                                                |
| P | P0AGC1 | DE | Hexose phosphate transport protein;                                                                                                                                     |
| P | P0AGC2 | DE | Hexose phosphate transport protein;                                                                                                                                     |
| P | P0AGE4 | CC | Involved in the import of serine and threonine into the cell, with the concomitant import of sodium (symport system).                                                   |
| P | P0AGE4 | CC | Involved in the import of serine and threonine into the cell, with the concomitant import of sodium (symport system).                                                   |
| P | P0AGE4 | DE | Na <sup>+</sup> /serine-threonine symporter;                                                                                                                            |
| P | P0AGE4 | DE | Na <sup>+</sup> /serine-threonine symporter;                                                                                                                            |
| P | P0AGE4 | DE | Serine/threonine transporter sstT;                                                                                                                                      |
| P | P0AGE4 | DR | neutral amino acid:sodium symporter activity                                                                                                                            |
| P | P0AGE4 | DR | sodium:dicarboxylate symporter activity                                                                                                                                 |
| P | P0AGE5 | CC | Involved in the import of serine and threonine into the cell, with the concomitant import of sodium (symport system) (By similarity).                                   |
| P | P0AGE5 | DE | Na <sup>+</sup> /serine-threonine symporter;                                                                                                                            |
| P | P0AGE5 | DR | sodium:dicarboxylate symporter activity                                                                                                                                 |
| P | P0AGE5 | DR | sodium:dicarboxylate symporter activity                                                                                                                                 |
| P | P0AGH4 | CC | Involved in a peptide intake transport system that plays a role in the resistance to antimicrobial peptides (By similarity).                                            |
| P | P0AGH4 | DE | Peptide transport system permease protein sapB;                                                                                                                         |
| P | P0AGH7 | CC | Involved in a peptide intake transport system that plays a role in the resistance to antimicrobial peptides (By similarity).                                            |

|   |        |    |                                                                                                                                                                       |
|---|--------|----|-----------------------------------------------------------------------------------------------------------------------------------------------------------------------|
| P | P0AGH7 | DE | Peptide transport system permease protein sapC;                                                                                                                       |
| P | P0AGH8 | CC | Part of the binding-protein-dependent transport system for phosphate; probably responsible for the translocation of the substrate across the membrane.                |
| P | P0AGH8 | DE | Phosphate transport system permease protein pstC;                                                                                                                     |
| P | P0AGH8 | DR | inorganic phosphate transmembrane transporter activity                                                                                                                |
| P | P0AGH9 | CC | Part of the binding-protein-dependent transport system for phosphate; probably responsible for the translocation of the substrate across the membrane (By similarity) |
| P | P0AGH9 | DE | Phosphate transport system permease protein pstC;                                                                                                                     |
| P | P0AGH9 | DR | inorganic phosphate transmembrane transporter activity                                                                                                                |
| P | P0AGI0 | CC | Part of the binding-protein-dependent transport system for phosphate; probably responsible for the translocation of the substrate across the membrane (By similarity) |
| P | P0AGI0 | DE | Phosphate transport system permease protein pstC;                                                                                                                     |
| P | P0AGI0 | DR | inorganic phosphate transmembrane transporter activity                                                                                                                |
| P | P0AGI1 | CC | Part of the binding-protein-dependent transport system for ribose                                                                                                     |
| P | P0AGI1 | DE | Ribose transport system permease protein rbsC;                                                                                                                        |
| P | P0AGI3 | CC | Part of the binding-protein-dependent transport system for ribose                                                                                                     |
| P | P0AGI3 | DE | Ribose transport system permease protein rbsC;                                                                                                                        |
| P | P0AGI4 | DE | Xylose transport system permease protein xylH;                                                                                                                        |
| P | P0AGI6 | CC | Part of the binding-protein-dependent transport system for D-xylose                                                                                                   |
| P | P0AGI6 | DE | Xylose transport system permease protein xylH;                                                                                                                        |
| P | P0AGI7 | CC | Part of the binding-protein-dependent transport system for D-xylose                                                                                                   |
| P | P0AGI7 | DE | Xylose transport system permease protein xylH;                                                                                                                        |
| P | P0AGM7 | CC | Transport of uracil in the cell.                                                                                                                                      |
| P | P0AGM7 | DE | Uracil permease;                                                                                                                                                      |
| P | P0AGM7 | DE | Uracil transporter;                                                                                                                                                   |
| P | P0AGM8 | CC | Transport of uracil in the cell (By similarity).                                                                                                                      |
| P | P0AGM8 | DE | Uracil permease;                                                                                                                                                      |
| P | P0AGM8 | DE | Uracil transporter;                                                                                                                                                   |
| P | P0COL7 | CC | Proton symporter that senses osmotic shifts and responds by importing osmolytes such as proline, glycine betaine, stachydrine, pipecolic acid, ectoine and taurine    |
| P | P0COL7 | DE | Proline porter II;                                                                                                                                                    |
| P | P0COL7 | DE | Proline/betaine transporter;                                                                                                                                          |
| P | P0COL7 | DE | Proline/betaine transporter;                                                                                                                                          |
| P | P0COL8 | CC | Proton symporter that senses osmotic shifts and responds by importing osmolytes such as proline, glycine betaine, stachydrine, pipecolic acid, ectoine and taurine    |
| P | P0COL8 | DE | Proline porter II;                                                                                                                                                    |
| P | P0COL8 | DE | Proline/betaine transporter;                                                                                                                                          |
| P | P0COL8 | DE | Proline/betaine transporter;                                                                                                                                          |
| P | P0C105 | CC | Intake of glucose and galactose (Potential).                                                                                                                          |
| P | P0C105 | DE | Glucose/galactose transporter;                                                                                                                                        |
| P | P0C105 | DE | Glucose/galactose transporter;                                                                                                                                        |
| P | P0C105 | DR | galactose transmembrane transporter activity                                                                                                                          |
| P | P0C105 | DR | glucose transmembrane transporter activity                                                                                                                            |
| P | P0C2M5 | CC | Part of the ABC transporter complex pstSACB involved in phosphate import (Probably)                                                                                   |
| P | P0C2M5 | DE | Phosphate-binding protein pstS 2;                                                                                                                                     |
| P | P0C2U2 | DE | Di-/tripeptide transporter;                                                                                                                                           |
| P | P0CAT6 | CC | Part of the ABC transporter complex PstSACB involved in phosphate import                                                                                              |
| P | P0CAT6 | DE | ABC phosphate transporter;                                                                                                                                            |
| P | P0CAT6 | DE | Phosphate import ATP-binding protein PstB;                                                                                                                            |
| P | P0CAT6 | DE | Phosphate-transporting ATPase;                                                                                                                                        |
| P | P0CAT6 | DR | inorganic phosphate transmembrane transporter activity                                                                                                                |
| P | P0CAT6 | DR | phosphate transmembrane-transporting ATPase activity                                                                                                                  |
| P | P0CD90 | CC | Water channel required to facilitate the transport of water across membranes                                                                                          |
| P | P0CD91 | CC | Water channel required to facilitate the transport of water across membranes                                                                                          |
| P | P0CD99 | CC | High-affinity uptake of maltose and maltotriose                                                                                                                       |
| P | P0CD99 | DE | Maltose transport protein 2;                                                                                                                                          |
| P | P0CD99 | DR | maltose transmembrane transporter activity                                                                                                                            |
| P | P0CE00 | CC | High-affinity uptake of maltose and maltotriose                                                                                                                       |
| P | P0CE00 | DE | Maltose transport protein 3;                                                                                                                                          |
| P | P0CE45 | CC | Responsible for the transport of glucuronide into the cell energized by the proton motive force (probably by symport)                                                 |
| P | P0CE45 | DE | Glucuronide carrier protein;                                                                                                                                          |
| P | P0CE45 | DE | Glucuronide permease;                                                                                                                                                 |
| P | P10346 | CC | Part of the binding-protein-dependent transport system for glutamine                                                                                                  |
| P | P10346 | DE | Glutamine transport ATP-binding protein GlnQ;                                                                                                                         |

|   |        |    |                                                                                                                                                                                                                                              |
|---|--------|----|----------------------------------------------------------------------------------------------------------------------------------------------------------------------------------------------------------------------------------------------|
| P | P10502 | CC | Catalyzes the sodium-dependent uptake of extracellular L-proline.                                                                                                                                                                            |
| P | P10502 | DE | Proline permease;                                                                                                                                                                                                                            |
| P | P10502 | DE | Sodium/proline symporter;                                                                                                                                                                                                                    |
| P | P10502 | DE | Sodium/proline symporter;                                                                                                                                                                                                                    |
| P | P10502 | DR | proline:sodium symporter activity                                                                                                                                                                                                            |
| P | P10502 | DR | proline:sodium symporter activity                                                                                                                                                                                                            |
| P | P10870 | CC | Can function as a negative regulator of glucose transport                                                                                                                                                                                    |
| P | P10870 | CC | High-affinity glucose transporter                                                                                                                                                                                                            |
| P | P10870 | CC | Inhibition of RGT1 by low levels of glucose, and hence induction of HTX2 and HTX4 expression, requires SNF3.                                                                                                                                 |
| P | P10870 | CC | Serves as a sensor that generates an intracellular signal in the presence of low level of glucose                                                                                                                                            |
| P | P10870 | DE | High-affinity glucose transporter SNF3;                                                                                                                                                                                                      |
| P | P10903 | CC | Involved in excretion of nitrite produced by the dissimilatory reduction of nitrate.                                                                                                                                                         |
| P | P10903 | DE | Nitrite extrusion protein 1;                                                                                                                                                                                                                 |
| P | P10903 | DE | Nitrite facilitator 1;                                                                                                                                                                                                                       |
| P | P10903 | DR | nitrite efflux transmembrane transporter activity                                                                                                                                                                                            |
| P | P10903 | DR | nitrite uptake transmembrane transporter activity                                                                                                                                                                                            |
| P | P11162 | CC | This system is involved in lactose transport.                                                                                                                                                                                                |
| P | P11162 | DE | Lactose permease IIC component;                                                                                                                                                                                                              |
| P | P11162 | DE | Lactose-specific phosphotransferase enzyme IIB component;                                                                                                                                                                                    |
| P | P11162 | DE | PTS system lactose-specific EIIB component;                                                                                                                                                                                                  |
| P | P11162 | DE | PTS system lactose-specific EIIC component;                                                                                                                                                                                                  |
| P | P11162 | DE | PTS system lactose-specific EIICB component;                                                                                                                                                                                                 |
| P | P11166 | CC | Facilitative glucose transporter                                                                                                                                                                                                             |
| P | P11166 | CC | This isoform may be responsible for constitutive or basal glucose uptake                                                                                                                                                                     |
| P | P11166 | DE | Glucose transporter type 1, erythrocyte/brain;                                                                                                                                                                                               |
| P | P11166 | DE | HepG2 glucose transporter;                                                                                                                                                                                                                   |
| P | P11166 | DE | Solute carrier family 2, facilitated glucose transporter member 1;                                                                                                                                                                           |
| P | P11166 | DR | D-glucose transmembrane transporter activity                                                                                                                                                                                                 |
| P | P11168 | CC | Facilitative glucose transporter                                                                                                                                                                                                             |
| P | P11168 | CC | May also participate with the Na <sup>+</sup> /glucose cotransporter in the transcellular transport of glucose in the small intestine and kidney.                                                                                            |
| P | P11168 | CC | This isoform likely mediates the bidirectional transfer of glucose across the plasma membrane of hepatocytes and is responsible for uptake of glucose by the beta cells; may comprise part of the glucose-sensing mechanism of the beta cell |
| P | P11168 | DE | Glucose transporter type 2, liver;                                                                                                                                                                                                           |
| P | P11168 | DE | Solute carrier family 2, facilitated glucose transporter member 2;                                                                                                                                                                           |
| P | P11168 | DR | D-glucose transmembrane transporter activity                                                                                                                                                                                                 |
| P | P11169 | CC | Facilitative glucose transporter                                                                                                                                                                                                             |
| P | P11169 | CC | Probably a neuronal glucose transporter.                                                                                                                                                                                                     |
| P | P11169 | DE | Glucose transporter type 3, brain;                                                                                                                                                                                                           |
| P | P11169 | DE | Solute carrier family 2, facilitated glucose transporter member 3;                                                                                                                                                                           |
| P | P11169 | DR | D-glucose transmembrane transporter activity                                                                                                                                                                                                 |
| P | P11461 | CC | Angiogenic receptor, essential component of the iron uptake system of <i>V. anguillarum</i> .                                                                                                                                                |
| P | P11551 | CC | Can also transport L-galactose and D-arabinose, but at reduced rates compared with L-fucose                                                                                                                                                  |
| P | P11551 | CC | Mediates the uptake of L-fucose across the boundary membrane with the concomitant transport of protons into the cell (symport system)                                                                                                        |
| P | P11551 | DE | 6-deoxy-L-galactose permease;                                                                                                                                                                                                                |
| P | P11551 | DE | L-fucose permease;                                                                                                                                                                                                                           |
| P | P11551 | DE | L-fucose-proton symporter;                                                                                                                                                                                                                   |
| P | P11636 | DE | Quinate permease;                                                                                                                                                                                                                            |
| P | P11636 | DE | Quinate transporter;                                                                                                                                                                                                                         |
| P | P11881 | CC | Intracellular channel that mediates calcium release from the endoplasmic reticulum following stimulation by inositol 1,4,5- trisphosphate.                                                                                                   |
| P | P11881 | DR | inositol 1,4,5-trisphosphate-sensitive calcium-release channel activity                                                                                                                                                                      |
| P | P12234 | CC | Phosphate is cotransported with H <sup>+</sup> .                                                                                                                                                                                             |
| P | P12234 | CC | Transport of phosphate groups from the cytosol to the mitochondrial matrix                                                                                                                                                                   |
| P | P12234 | DE | Phosphate carrier protein, mitochondrial;                                                                                                                                                                                                    |
| P | P12234 | DE | Phosphate transport protein;                                                                                                                                                                                                                 |
| P | P12235 | CC | Catalyzes the exchange of ADP and ATP across the mitochondrial inner membrane                                                                                                                                                                |
| P | P12235 | CC | Catalyzes the exchange of ADP and ATP across the mitochondrial inner membrane                                                                                                                                                                |
| P | P12235 | DE | ADP,ATP carrier protein 1;                                                                                                                                                                                                                   |
| P | P12235 | DE | ADP,ATP carrier protein, heart/skeletal muscle isoform T1;                                                                                                                                                                                   |

|   |        |    |                                                                                                                                                                                   |
|---|--------|----|-----------------------------------------------------------------------------------------------------------------------------------------------------------------------------------|
| P | P12235 | DE | ADP/ATP translocase 1;                                                                                                                                                            |
| P | P12235 | DE | ADP/ATP translocase 1;                                                                                                                                                            |
| P | P12236 | CC | Catalyzes the exchange of ADP and ATP across the mitochondrial inner membrane                                                                                                     |
| P | P12236 | CC | Catalyzes the exchange of ADP and ATP across the mitochondrial inner membrane                                                                                                     |
| P | P12236 | DE | ADP,ATP carrier protein 3;                                                                                                                                                        |
| P | P12236 | DE | ADP,ATP carrier protein, isoform T2;                                                                                                                                              |
| P | P12236 | DE | ADP/ATP translocase 3;                                                                                                                                                            |
| P | P12236 | DE | ADP/ATP translocase 3;                                                                                                                                                            |
| P | P12236 | DR | ATP:ADP antiporter activity                                                                                                                                                       |
| P | P12236 | DR | ATP:ADP antiporter activity                                                                                                                                                       |
| P | P12655 | CC | This system is involved in sucrose transport.                                                                                                                                     |
| P | P12655 | DE | PTS system sucrose-specific EIIA component;                                                                                                                                       |
| P | P12655 | DE | PTS system sucrose-specific EIIB component;                                                                                                                                       |
| P | P12655 | DE | PTS system sucrose-specific EIIBCA component;                                                                                                                                     |
| P | P12655 | DE | PTS system sucrose-specific EIIC component;                                                                                                                                       |
| P | P12655 | DE | Sucrose permease IIC component;                                                                                                                                                   |
| P | P12655 | DE | Sucrose-specific phosphotransferase enzyme IIA component;                                                                                                                         |
| P | P12655 | DE | Sucrose-specific phosphotransferase enzyme IIB component;                                                                                                                         |
| P | P12685 | CC | This protein is required for high-affinity potassium transport.                                                                                                                   |
| P | P12685 | DE | High-affinity potassium transport protein;                                                                                                                                        |
| P | P12685 | DR | potassium ion transmembrane transporter activity                                                                                                                                  |
| P | P13036 | DE | Iron(III) dicitrate transport protein fecA;                                                                                                                                       |
| P | P13090 | CC | Appears to confer resistance only to aminotriazole.                                                                                                                               |
| P | P13090 | CC | Putative component of the machinery responsible for pumping aminotriazole (and possibly other toxic compounds) out of the cell                                                    |
| P | P13090 | DE | Aminotriazole resistance protein;                                                                                                                                                 |
| P | P13181 | CC | GAL2 is a facilitated diffusion transporter required for both the high-affinity galactokinase-dependent and low-affinity galactokinase-independent galactose transport processes. |
| P | P13181 | DE | Galactose permease;                                                                                                                                                               |
| P | P13181 | DE | Galactose transporter;                                                                                                                                                            |
| P | P13181 | DR | galactose transmembrane transporter activity                                                                                                                                      |
| P | P13181 | DR | glucose transmembrane transporter activity                                                                                                                                        |
| P | P13511 | CC | CzcA and CzcB together would act in zinc efflux nearly as effectively as the complete CZC efflux system (CzcABC).                                                                 |
| P | P13511 | CC | Has a low cation transport activity for cobalt, it is essential for the expression of cobalt, zinc, and cadmium resistance                                                        |
| P | P13511 | CC | Has a low cation transport activity for cobalt, it is essential for the expression of cobalt, zinc, and cadmium resistance                                                        |
| P | P13569 | CC | Involved in the transport of chloride ions                                                                                                                                        |
| P | P13569 | DE | cAMP-dependent chloride channel;                                                                                                                                                  |
| P | P13569 | DR | ATP-binding and phosphorylation-dependent chloride channel activity                                                                                                               |
| P | P13569 | DR | chloride channel regulator activity                                                                                                                                               |
| P | P13586 | CC | This magnesium-dependent enzyme catalyzes the hydrolysis of ATP coupled with the transport of calcium                                                                             |
| P | P13586 | DE | Calcium-transporting ATPase 1;                                                                                                                                                    |
| P | P13586 | DE | Golgi Ca <sup>2+</sup> -ATPase;                                                                                                                                                   |
| P | P13586 | DR | calcium-transporting ATPase activity                                                                                                                                              |
| P | P13586 | DR | manganese-transporting ATPase activity                                                                                                                                            |
| P | P13587 | CC | This magnesium-dependent enzyme catalyzes the hydrolysis of ATP coupled with the transport of the sodium or lithium ions to allow salt tolerance                                  |
| P | P13587 | DE | Sodium transport ATPase 1;                                                                                                                                                        |
| P | P13587 | DR | sodium-exporting ATPase activity, phosphorylative mechanism                                                                                                                       |
| P | P13637 | CC | This action creates the electrochemical gradient of sodium and potassium ions, providing the energy for active transport of various nutrients.                                    |
| P | P13637 | CC | This action creates the electrochemical gradient of sodium and potassium ions, providing the energy for active transport of various nutrients.                                    |
| P | P13637 | CC | This is the catalytic component of the active enzyme, which catalyzes the hydrolysis of ATP coupled with the exchange of sodium and potassium ions across the plasma membrane     |
| P | P13637 | CC | This is the catalytic component of the active enzyme, which catalyzes the hydrolysis of ATP coupled with the exchange of sodium and potassium ions across the plasma membrane     |
| P | P13637 | DE | Na <sup>+</sup> /K <sup>+</sup> ATPase alpha(III) subunit;                                                                                                                        |
| P | P13637 | DE | Na <sup>+</sup> /K <sup>+</sup> ATPase alpha(III) subunit;                                                                                                                        |

|   |        |    |                                                                                                                                                                                                                                                 |
|---|--------|----|-------------------------------------------------------------------------------------------------------------------------------------------------------------------------------------------------------------------------------------------------|
| P | P13637 | DE | Na <sup>+</sup> /K <sup>+</sup> ATPase alpha-3 subunit;                                                                                                                                                                                         |
| P | P13637 | DE | Na <sup>+</sup> /K <sup>+</sup> ATPase alpha-3 subunit;                                                                                                                                                                                         |
| P | P13637 | DE | Sodium pump subunit alpha-3;                                                                                                                                                                                                                    |
| P | P13637 | DE | Sodium/potassium-transporting ATPase subunit alpha-3;                                                                                                                                                                                           |
| P | P13637 | DE | Sodium/potassium-transporting ATPase subunit alpha-3;                                                                                                                                                                                           |
| P | P13637 | DR | sodium:potassium-exchanging ATPase activity                                                                                                                                                                                                     |
| P | P13637 | DR | sodium:potassium-exchanging ATPase activity                                                                                                                                                                                                     |
| P | P13738 | CC | Can mediate sodium uptake when a transmembrane pH gradient is applied                                                                                                                                                                           |
| P | P13738 | CC | Catalyzes the exchange of 2 H <sup>+</sup> per Na <sup>+</sup>                                                                                                                                                                                  |
| P | P13738 | CC | Catalyzes the exchange of 2 H <sup>+</sup> per Na <sup>+</sup>                                                                                                                                                                                  |
| P | P13738 | CC | Na <sup>+</sup> /H <sup>+</sup> antiporter that extrudes sodium in exchange for external protons                                                                                                                                                |
| P | P13738 | CC | Na <sup>+</sup> /H <sup>+</sup> antiporter that extrudes sodium in exchange for external protons                                                                                                                                                |
| P | P13738 | DE | Na <sup>+</sup> /H <sup>+</sup> antiporter nhaA;                                                                                                                                                                                                |
| P | P13738 | DE | Na <sup>+</sup> /H <sup>+</sup> antiporter nhaA;                                                                                                                                                                                                |
| P | P13738 | DE | Sodium/proton antiporter nhaA;                                                                                                                                                                                                                  |
| P | P13808 | DR | chloride transmembrane transporter activity                                                                                                                                                                                                     |
| P | P13866 | CC | Actively transports glucose into cells by Na <sup>+</sup> cotransport with a Na <sup>+</sup> to glucose coupling ratio of 2:1                                                                                                                   |
| P | P13866 | CC | Actively transports glucose into cells by Na <sup>+</sup> cotransport with a Na <sup>+</sup> to glucose coupling ratio of 2:1                                                                                                                   |
| P | P13866 | CC | Efficient substrate transport in mammalian kidney is provided by the concerted action of a low affinity high capacity and a high affinity low capacity Na <sup>+</sup> /glucose cotransporter arranged in series along kidney proximal tubules. |
| P | P13866 | CC | Efficient substrate transport in mammalian kidney is provided by the concerted action of a low affinity high capacity and a high affinity low capacity Na <sup>+</sup> /glucose cotransporter arranged in series along kidney proximal tubules. |
| P | P13866 | DE | High affinity sodium-glucose cotransporter;                                                                                                                                                                                                     |
| P | P13866 | DE | Na <sup>+</sup> /glucose cotransporter 1;                                                                                                                                                                                                       |
| P | P13866 | DE | Na <sup>+</sup> /glucose cotransporter 1;                                                                                                                                                                                                       |
| P | P13866 | DE | Sodium/glucose cotransporter 1;                                                                                                                                                                                                                 |
| P | P13866 | DE | Sodium/glucose cotransporter 1;                                                                                                                                                                                                                 |
| P | P13866 | DR | glucose:sodium symporter activity                                                                                                                                                                                                               |
| P | P13866 | DR | glucose:sodium symporter activity                                                                                                                                                                                                               |
| P | P14094 | CC | The beta subunit regulates, through assembly of alpha/beta heterodimers, the number of sodium pumps transported to the plasma membrane.                                                                                                         |
| P | P14094 | CC | This is the non-catalytic component of the active enzyme, which catalyzes the hydrolysis of ATP coupled with the exchange of Na <sup>+</sup> and K <sup>+</sup> ions across the plasma membrane.                                                |
| P | P14094 | CC | This is the non-catalytic component of the active enzyme, which catalyzes the hydrolysis of ATP coupled with the exchange of Na <sup>+</sup> and K <sup>+</sup> ions across the plasma membrane.                                                |
| P | P14094 | DE | Sodium/potassium-dependent ATPase subunit beta-1;                                                                                                                                                                                               |
| P | P14094 | DE | Sodium/potassium-dependent ATPase subunit beta-1;                                                                                                                                                                                               |
| P | P14094 | DE | Sodium/potassium-transporting ATPase subunit beta-1;                                                                                                                                                                                            |
| P | P14094 | DE | Sodium/potassium-transporting ATPase subunit beta-1;                                                                                                                                                                                            |
| P | P14142 | CC | Insulin-regulated facilitative glucose transporter.                                                                                                                                                                                             |
| P | P14142 | DE | Glucose transporter type 4, insulin-responsive;                                                                                                                                                                                                 |
| P | P14142 | DE | Solute carrier family 2, facilitated glucose transporter member 4;                                                                                                                                                                              |
| P | P14142 | DR | insulin-responsive hydrogen:glucose symporter activity                                                                                                                                                                                          |
| P | P14175 | CC | Involved in a multicomponent binding-protein-dependent transport system for glycine betaine/L-proline.                                                                                                                                          |
| P | P14175 | DE | Glycine betaine/L-proline transport ATP-binding protein ProV;                                                                                                                                                                                   |
| P | P14176 | CC | Involved in a multicomponent binding-protein-dependent transport system for glycine betaine/L-proline.                                                                                                                                          |
| P | P14176 | DE | Glycine betaine/L-proline transport system permease protein proW;                                                                                                                                                                               |
| P | P14231 | CC | This is the non-catalytic component of the active enzyme, which catalyzes the hydrolysis of ATP coupled with the exchange of Na <sup>+</sup> and K <sup>+</sup> ions across the plasma membrane.                                                |
| P | P14231 | CC | This is the non-catalytic component of the active enzyme, which catalyzes the hydrolysis of ATP coupled with the exchange of Na <sup>+</sup> and K <sup>+</sup> ions across the plasma membrane.                                                |
| P | P14231 | DE | Sodium/potassium-dependent ATPase subunit beta-2;                                                                                                                                                                                               |
| P | P14231 | DE | Sodium/potassium-dependent ATPase subunit beta-2;                                                                                                                                                                                               |
| P | P14231 | DE | Sodium/potassium-transporting ATPase subunit beta-2;                                                                                                                                                                                            |
| P | P14231 | DE | Sodium/potassium-transporting ATPase subunit beta-2;                                                                                                                                                                                            |
| P | P14231 | DR | sodium:potassium-exchanging ATPase activity                                                                                                                                                                                                     |
| P | P14231 | DR | sodium:potassium-exchanging ATPase activity                                                                                                                                                                                                     |
| P | P14246 | CC | Facilitative glucose transporter                                                                                                                                                                                                                |

|   |        |    |                                                                                                                                                                                                                                              |
|---|--------|----|----------------------------------------------------------------------------------------------------------------------------------------------------------------------------------------------------------------------------------------------|
| P | P14246 | CC | May also participate with the Na <sup>+</sup> /glucose cotransporter in the transcellular transport of glucose in the small intestine and kidney.                                                                                            |
| P | P14246 | CC | This isoform likely mediates the bidirectional transfer of glucose across the plasma membrane of hepatocytes and is responsible for uptake of glucose by the beta cells; may comprise part of the glucose-sensing mechanism of the beta cell |
| P | P14246 | DE | Glucose transporter type 2, liver;                                                                                                                                                                                                           |
| P | P14246 | DE | Solute carrier family 2, facilitated glucose transporter member 2;                                                                                                                                                                           |
| P | P14246 | DR | D-glucose transmembrane transporter activity                                                                                                                                                                                                 |
| P | P14415 | CC | This is the non-catalytic component of the active enzyme, which catalyzes the hydrolysis of ATP coupled with the exchange of Na <sup>+</sup> and K <sup>+</sup> ions across the plasma membrane                                              |
| P | P14415 | CC | This is the non-catalytic component of the active enzyme, which catalyzes the hydrolysis of ATP coupled with the exchange of Na <sup>+</sup> and K <sup>+</sup> ions across the plasma membrane                                              |
| P | P14415 | DE | Sodium/potassium-dependent ATPase subunit beta-2;                                                                                                                                                                                            |
| P | P14415 | DE | Sodium/potassium-dependent ATPase subunit beta-2;                                                                                                                                                                                            |
| P | P14415 | DE | Sodium/potassium-transporting ATPase subunit beta-2;                                                                                                                                                                                         |
| P | P14415 | DE | Sodium/potassium-transporting ATPase subunit beta-2;                                                                                                                                                                                         |
| P | P14415 | DR | sodium:potassium-exchanging ATPase activity                                                                                                                                                                                                  |
| P | P14415 | DR | sodium:potassium-exchanging ATPase activity                                                                                                                                                                                                  |
| P | P14672 | CC | Insulin-regulated facilitative glucose transporter.                                                                                                                                                                                          |
| P | P14672 | DE | Glucose transporter type 4, insulin-responsive;                                                                                                                                                                                              |
| P | P14672 | DE | Solute carrier family 2, facilitated glucose transporter member 4;                                                                                                                                                                           |
| P | P14672 | DR | D-glucose transmembrane transporter activity                                                                                                                                                                                                 |
| P | P14772 | CC | Cooperates for the ATP-dependent vacuolar transport of bilirubin and glutathione conjugates.                                                                                                                                                 |
| P | P14788 | CC | Part of the ABC transporter complex CysA-W is involved in sulfate/inosinate import                                                                                                                                                           |
| P | P14788 | DE | Sulfate-transporting ATPase;                                                                                                                                                                                                                 |
| P | P14788 | DE | Sulfate/thiosulfate import ATP-binding protein CysA;                                                                                                                                                                                         |
| P | P14788 | DR | sulfate transmembrane-transporting ATPase activity                                                                                                                                                                                           |
| P | P14867 | CC | GABA, the major inhibitory neurotransmitter in the vertebrate brain, mediates neuronal inhibition by binding to the GABA/benzodiazepine receptor and opening an integral chloride channel.                                                   |
| P | P14867 | DR | chloride channel activity                                                                                                                                                                                                                    |
| P | P15365 | CC | Component of the allantoate transport system.                                                                                                                                                                                                |
| P | P15365 | DE | Allantoate permease;                                                                                                                                                                                                                         |
| P | P15365 | DR | allantoate transmembrane transporter activity                                                                                                                                                                                                |
| P | P15380 | CC | May be responsible for proline recognition and probably also for proline translocation across the plasma membrane                                                                                                                            |
| P | P15380 | CC | Required for high-affinity proline transport                                                                                                                                                                                                 |
| P | P15380 | DE | Proline-specific permease;                                                                                                                                                                                                                   |
| P | P15388 | CC | Assuming opened or closed conformations in response to the voltage difference across the membrane, the protein forms a potassium-selective channel through which potassium ions may pass in accordance with their electrochemical gradient   |
| P | P15388 | CC | mediates the voltage-dependent potassium ion permeability or exchange membrane                                                                                                                                                               |
| P | P15388 | DE | Potassium voltage-gated channel subfamily C member 1;                                                                                                                                                                                        |
| P | P15388 | DE | Voltage-gated potassium channel subunit Kv3.1;                                                                                                                                                                                               |
| P | P15388 | DE | Voltage-gated potassium channel subunit Kv4;                                                                                                                                                                                                 |
| P | P15388 | DR | voltage-gated potassium channel activity                                                                                                                                                                                                     |
| P | P15685 | CC | Transporter for maltose.                                                                                                                                                                                                                     |
| P | P15685 | DE | Maltose permease MAL61;                                                                                                                                                                                                                      |
| P | P15685 | DE | Maltose transport protein MAL61;                                                                                                                                                                                                             |
| P | P15686 | DE | H <sup>+</sup> /hexose cotransporter 1;                                                                                                                                                                                                      |
| P | P15686 | DE | H <sup>+</sup> /hexose cotransporter 1;                                                                                                                                                                                                      |
| P | P15710 | CC | These include this high-affinity phosphate permease, which is part of a functional entity called ptsII                                                                                                                                       |
| P | P15710 | DE | Phosphate-repressible phosphate permease;                                                                                                                                                                                                    |
| P | P15710 | DR | inorganic phosphate transmembrane transporter activity                                                                                                                                                                                       |
| P | P15712 | CC | Part of the ABC transporter complex pstSACB involved in phosphate import (By similarity).                                                                                                                                                    |
| P | P15712 | DE | Phosphate-binding protein pstS 1;                                                                                                                                                                                                            |
| P | P15712 | DR | inorganic phosphate transmembrane transporter activity                                                                                                                                                                                       |
| P | P15729 | DE | Glucose transport protein;                                                                                                                                                                                                                   |
| P | P15993 | DE | Aromatic amino acid transport protein AroP;                                                                                                                                                                                                  |
| P | P15993 | DE | General aromatic amino acid permease;                                                                                                                                                                                                        |
| P | P16102 | CC | Halorhodopsin is a light-driven chloride pump.                                                                                                                                                                                               |
| P | P16256 | CC | Catalyzes the sodium-dependent uptake of extracellular pantothenate.                                                                                                                                                                         |

|   |        |    |                                                                                                                                                                                                                                            |
|---|--------|----|--------------------------------------------------------------------------------------------------------------------------------------------------------------------------------------------------------------------------------------------|
| P | P16256 | DE | Sodium/pantothenate symporter;                                                                                                                                                                                                             |
| P | P16256 | DR | sodium ion transmembrane transporter activity                                                                                                                                                                                              |
| P | P16388 | CC | Assuming opened or closed conformations in response to the voltage difference across the membrane, the protein forms a potassium-selective channel through which potassium ions may pass in accordance with their electrochemical gradient |
| P | P16388 | CC | Mediates the voltage-dependent potassium ion permeability of excitable membranes                                                                                                                                                           |
| P | P16388 | DE | Potassium voltage-gated channel subfamily A member 1;                                                                                                                                                                                      |
| P | P16388 | DE | Voltage-gated potassium channel subunit Kv1.1;                                                                                                                                                                                             |
| P | P16389 | CC | Assuming opened or closed conformations in response to the voltage difference across the membrane, the protein forms a potassium-selective channel through which potassium ions may pass in accordance with their electrochemical gradient |
| P | P16389 | CC | Mediates the voltage-dependent potassium ion permeability of excitable membranes                                                                                                                                                           |
| P | P16389 | DE | Potassium voltage-gated channel subfamily A member 2;                                                                                                                                                                                      |
| P | P16389 | DE | Voltage-gated K+ channel HuKIV;                                                                                                                                                                                                            |
| P | P16389 | DE | Voltage-gated potassium channel HBK5;                                                                                                                                                                                                      |
| P | P16389 | DE | Voltage-gated potassium channel subunit Kv1.2;                                                                                                                                                                                             |
| P | P16389 | DR | delayed rectifier potassium channel activity                                                                                                                                                                                               |
| P | P16390 | CC | Assuming opened or closed conformations in response to the voltage difference across the membrane, the protein forms a potassium-selective channel through which potassium ions may pass in accordance with their electrochemical gradient |
| P | P16390 | CC | Mediates the voltage-dependent potassium ion permeability of excitable membranes                                                                                                                                                           |
| P | P16390 | DE | Potassium voltage-gated channel subfamily A member 3;                                                                                                                                                                                      |
| P | P16390 | DE | Voltage-gated potassium channel subunit Kv1.3;                                                                                                                                                                                             |
| P | P16482 | CC | Uptake of citrate across the boundary membrane with the concomitant transport of protons into the cell (symport system).                                                                                                                   |
| P | P16482 | DE | Citrate carrier protein;                                                                                                                                                                                                                   |
| P | P16482 | DE | Citrate transporter;                                                                                                                                                                                                                       |
| P | P16482 | DE | Citrate-proton symporter;                                                                                                                                                                                                                  |
| P | P16552 | CC | Responsible for transport of raffinose into the cell, with the concomitant import of a proton (symport system).                                                                                                                            |
| P | P16552 | DE | Raffinose permease;                                                                                                                                                                                                                        |
| P | P16615 | CC | This magnesium-dependent enzyme catalyzes the hydrolysis of ATP coupled with the translocation of calcium from the cytosol to the sarcoplasmic reticulum lumen                                                                             |
| P | P16615 | DE | Calcium pump 2;                                                                                                                                                                                                                            |
| P | P16615 | DE | Calcium-transporting ATPase sarcoplasmic reticulum type, slow twitch skeletal muscle isoform;                                                                                                                                              |
| P | P16615 | DE | Endoplasmic reticulum class 1/2 Ca2+ ATPase;                                                                                                                                                                                               |
| P | P16615 | DE | SR Ca2+-ATPase 2;                                                                                                                                                                                                                          |
| P | P16615 | DE | Sarcoplasmic/endoplasmic reticulum calcium ATPase 2;                                                                                                                                                                                       |
| P | P16615 | DR | calcium-transporting ATPase activity                                                                                                                                                                                                       |
| P | P16676 | CC | Part of the ABC transporter complex CysAW 1F involved in sulfate/inosulfate import                                                                                                                                                         |
| P | P16676 | CC | Part of the ABC transporter complex CysAW 1F involved in sulfate/inosulfate import                                                                                                                                                         |
| P | P16676 | DE | Sulfate-transporting ATPase;                                                                                                                                                                                                               |
| P | P16676 | DE | Sulfate/thiosulfate import ATP-binding protein CysA;                                                                                                                                                                                       |
| P | P16676 | DE | Sulfate/thiosulfate import ATP-binding protein CysA;                                                                                                                                                                                       |
| P | P16676 | DR | sulfate transmembrane-transporting ATPase activity                                                                                                                                                                                         |
| P | P16677 | CC | Part of the ABC transporter complex PhnCDE involved in phosphonates, phosphate esters, phosphite and phosphate import                                                                                                                      |
| P | P16677 | DR | phosphonate transmembrane-transporting ATPase activity                                                                                                                                                                                     |
| P | P16700 | CC | Part of the ABC transporter complex CysAWTP (TC 3.A.1.6.1) involved in sulfate/thiosulfate import                                                                                                                                          |
| P | P16700 | CC | Part of the ABC transporter complex CysAWTP (TC 3.A.1.6.1) involved in sulfate/thiosulfate import                                                                                                                                          |
| P | P16700 | CC | This protein specifically binds inosulfate and is involved in its transmembrane transport                                                                                                                                                  |
| P | P16700 | DE | Thiosulfate-binding protein;                                                                                                                                                                                                               |
| P | P16700 | DR | secondary active sulfate transmembrane transporter activity                                                                                                                                                                                |
| P | P16700 | DR | sulfate transmembrane-transporting ATPase activity                                                                                                                                                                                         |
| P | P16701 | CC | Part of the ABC transporter complex CysAWTP (TC 3.A.1.6.1) involved in sulfate/thiosulfate import                                                                                                                                          |
| P | P16701 | CC | Part of the ABC transporter complex CysAWTP (TC 3.A.1.6.1) involved in sulfate/thiosulfate import                                                                                                                                          |
| P | P16701 | DE | Sulfate transport system permease protein CysT;                                                                                                                                                                                            |
| P | P16701 | DR | sulfate transmembrane transporter activity                                                                                                                                                                                                 |
| P | P17064 | CC | This permease has a broad specificity towards purines, and also transport cytosine and 5-methylcytosine but neither uracil nor thymine.                                                                                                    |

|   |        |    |                                                                                                                                                                                                                                                              |
|---|--------|----|--------------------------------------------------------------------------------------------------------------------------------------------------------------------------------------------------------------------------------------------------------------|
| P | P17064 | DE | Cytosine/purine transport protein FCY2;                                                                                                                                                                                                                      |
| P | P17064 | DE | Cytosine/purine transport protein FCY2;                                                                                                                                                                                                                      |
| P | P17064 | DE | Purine-cytosine permease FCY2;                                                                                                                                                                                                                               |
| P | P17127 | CC | This system is involved in fructose transport (By similarity).                                                                                                                                                                                               |
| P | P17127 | DE | Fructose-specific phosphotransferase enzyme IIA component;                                                                                                                                                                                                   |
| P | P17127 | DE | PTS system fructose-specific EIIA component;                                                                                                                                                                                                                 |
| P | P17215 | CC | This protein is a component of the leucine, isoleucine, valine, threonine transport system, which is one of the two periplasmic binding protein-dependent transport systems of the high-affinity transport of the branched-chain amino acids (By similarity) |
| P | P17315 | CC | Postulated to participate in iron transport                                                                                                                                                                                                                  |
| P | P17327 | CC | Involved in a multicomponent binding-protein-dependent transport system for glycine betaine/L-proline.                                                                                                                                                       |
| P | P17327 | DE | Glycine betaine/L-proline transport system permease protein proW;                                                                                                                                                                                            |
| P | P17328 | CC | Involved in a multicomponent binding-protein-dependent transport system for glycine betaine/L-proline.                                                                                                                                                       |
| P | P17328 | DE | Glycine betaine/L-proline transport ATP-binding protein ProV;                                                                                                                                                                                                |
| P | P17583 | CC | This protein is part of an active transport system that transports exogenous cyanate into E.coli cells.                                                                                                                                                      |
| P | P17583 | DE | Cyanate transport protein CynX;                                                                                                                                                                                                                              |
| P | P17658 | CC | Assuming opened or closed conformations in response to the voltage difference across the membrane, the protein forms a potassium-selective channel through which potassium ions may pass in accordance with their electrochemical gradient                   |
| P | P17658 | CC | Mediates the voltage-dependent potassium ion permeability of excitable membranes                                                                                                                                                                             |
| P | P17658 | DE | Potassium voltage-gated channel subfamily A member 6;                                                                                                                                                                                                        |
| P | P17658 | DE | Voltage-gated potassium channel HBK2;                                                                                                                                                                                                                        |
| P | P17658 | DE | Voltage-gated potassium channel subunit Kv1.6;                                                                                                                                                                                                               |
| P | P17658 | DR | voltage-gated potassium channel activity                                                                                                                                                                                                                     |
| P | P17809 | CC | Facilitative glucose transporter                                                                                                                                                                                                                             |
| P | P17809 | CC | This isoform may be responsible for constitutive or basal glucose uptake                                                                                                                                                                                     |
| P | P17809 | DE | Glucose transporter type 1, erythrocyte/brain;                                                                                                                                                                                                               |
| P | P17809 | DE | Solute carrier family 2, facilitated glucose transporter member 1;                                                                                                                                                                                           |
| P | P17809 | DR | D-glucose transmembrane transporter activity                                                                                                                                                                                                                 |
| P | P17970 | CC | Assuming opened or closed conformations in response to the voltage difference across the membrane, the protein forms a potassium-selective channel through which potassium ions may pass in accordance with their electrochemical gradient                   |
| P | P17970 | CC | Mediates the voltage-dependent potassium ion permeability of excitable membranes                                                                                                                                                                             |
| P | P17970 | DE | Potassium voltage-gated channel protein Shab;                                                                                                                                                                                                                |
| P | P17970 | DR | voltage-gated potassium channel activity                                                                                                                                                                                                                     |
| P | P17971 | CC | Assuming opened or closed conformations in response to the voltage difference across the membrane, the protein forms a potassium-selective channel through which potassium ions may pass in accordance with their electrochemical gradient                   |
| P | P17971 | CC | Mediates the voltage-dependent potassium ion permeability of excitable membranes                                                                                                                                                                             |
| P | P17971 | DE | Potassium voltage-gated channel protein Shal;                                                                                                                                                                                                                |
| P | P17971 | DR | A-type (transient outward) potassium channel activity                                                                                                                                                                                                        |
| P | P17972 | CC | Assuming opened or closed conformations in response to the voltage difference across the membrane, the protein forms a potassium-selective channel through which potassium ions may pass in accordance with their electrochemical gradient                   |
| P | P17972 | CC | Mediates the voltage-dependent potassium ion permeability of excitable membranes                                                                                                                                                                             |
| P | P17972 | DE | Potassium voltage-gated channel protein Shaw;                                                                                                                                                                                                                |
| P | P17972 | DR | voltage-gated potassium channel activity                                                                                                                                                                                                                     |
| P | P18238 | CC | Catalyzes the exchange of ADP and ATP across the mitochondrial inner membrane                                                                                                                                                                                |
| P | P18238 | CC | Catalyzes the exchange of ADP and ATP across the mitochondrial inner membrane                                                                                                                                                                                |
| P | P18238 | DE | ADP,ATP carrier protein 3;                                                                                                                                                                                                                                   |
| P | P18238 | DE | ADP/ATP translocase 3;                                                                                                                                                                                                                                       |
| P | P18238 | DE | ADP/ATP translocase 3;                                                                                                                                                                                                                                       |
| P | P18239 | CC | Catalyzes the exchange of ADP and ATP across the mitochondrial inner membrane                                                                                                                                                                                |
| P | P18239 | CC | Catalyzes the exchange of ADP and ATP across the mitochondrial inner membrane                                                                                                                                                                                |
| P | P18239 | DE | ADP,ATP carrier protein 2;                                                                                                                                                                                                                                   |
| P | P18239 | DE | ADP/ATP translocase 2;                                                                                                                                                                                                                                       |
| P | P18239 | DE | ADP/ATP translocase 2;                                                                                                                                                                                                                                       |
| P | P18239 | DR | ATP:ADP antiporter activity                                                                                                                                                                                                                                  |
| P | P18239 | DR | ATP:ADP antiporter activity                                                                                                                                                                                                                                  |
| P | P18275 | CC | Catalyzes an electroneutral exchange between arginine and ornithine to allow high-efficiency energy conversion in the arginine deiminase pathway.                                                                                                            |



|   |        |    |                                                                                                                                                                                            |
|---|--------|----|--------------------------------------------------------------------------------------------------------------------------------------------------------------------------------------------|
| P | P18275 | CC | Catalyzes an electroneutral exchange between arginine and ornithine to allow high-efficiency energy conversion in the arginine deiminase pathway.                                          |
| P | P18275 | DE | Arginine/ornithine antiporter;                                                                                                                                                             |
| P | P18275 | DE | Arginine/ornithine antiporter;                                                                                                                                                             |
| P | P18505 | CC | GABA, the major inhibitory neurotransmitter in the vertebrate brain, mediates neuronal inhibition by binding to the GABA/benzodiazepine receptor and opening an integral chloride channel. |
| P | P18505 | DR | chloride channel activity                                                                                                                                                                  |
| P | P18507 | CC | GABA, the major inhibitory neurotransmitter in the vertebrate brain, mediates neuronal inhibition by binding to the GABA/benzodiazepine receptor and opening an integral chloride channel. |
| P | P18507 | DR | chloride channel activity                                                                                                                                                                  |
| P | P18766 | DE | Oligopeptide transport ATP-binding protein AmiF;                                                                                                                                           |
| P | P18791 | CC | Part of the binding-protein-dependent transport system for oligopeptides; probably an oligopeptide binding protein.                                                                        |
| P | P18791 | DE | Oligopeptide-binding protein AmiA;                                                                                                                                                         |
| P | P18895 | DE | Alginate production protein AlgE;                                                                                                                                                          |
| P | P19072 | CC | BraB is specific for isoleucine, leucine and valine                                                                                                                                        |
| P | P19072 | CC | BraB is specific for isoleucine, leucine and valine                                                                                                                                        |
| P | P19072 | CC | BraB is specific for isoleucine, leucine and valine                                                                                                                                        |
| P | P19072 | CC | The LIV-II transport system is coupled to sodium and lithium ions.                                                                                                                         |
| P | P19255 | CC | Glycerol enters the cell via the glycerol diffusion facilitator protein                                                                                                                    |
| P | P19255 | CC | This membrane protein facilitates the movement of glycerol across the cytoplasmic membrane (By similarity).                                                                                |
| P | P19255 | DE | Probable glycerol uptake facilitator protein;                                                                                                                                              |
| P | P19566 | CC | Part of the ABC transporter complex MalEFGK involved in maltose/maltodextrin import                                                                                                        |
| P | P19566 | DE | Maltose/maltodextrin import ATP-binding protein MalK;                                                                                                                                      |
| P | P19566 | DR | maltose-transporting ATPase activity                                                                                                                                                       |
| P | P19568 | CC | Provides the rickettsial cell with host ATP in exchange for rickettsial ADP                                                                                                                |
| P | P19568 | CC | Provides the rickettsial cell with host ATP in exchange for rickettsial ADP                                                                                                                |
| P | P19568 | DE | ADP/ATP carrier protein 1;                                                                                                                                                                 |
| P | P19568 | DE | ADP/ATP translocase 1;                                                                                                                                                                     |
| P | P19568 | DE | ADP/ATP translocase 1;                                                                                                                                                                     |
| P | P19568 | DR | ATP:ADP antiporter activity                                                                                                                                                                |
| P | P19568 | DR | ATP:ADP antiporter activity                                                                                                                                                                |
| P | P19576 | CC | Involved in the high-affinity maltose membrane transport system                                                                                                                            |
| P | P19576 | DE | Maltose-binding periplasmic protein;                                                                                                                                                       |
| P | P19576 | DR | maltose transmembrane transporter activity                                                                                                                                                 |
| P | P19634 | CC | major proton extruding system driven by the inward sodium ion chemical gradient                                                                                                            |
| P | P19634 | DE | Na <sup>+</sup> /H <sup>+</sup> antiporter, amiloride-sensitive;                                                                                                                           |
| P | P19634 | DE | Na <sup>+</sup> /H <sup>+</sup> exchanger 1;                                                                                                                                               |
| P | P19634 | DE | Sodium/hydrogen exchanger 1;                                                                                                                                                               |
| P | P19634 | DR | sodium:hydrogen antiporter activity                                                                                                                                                        |
| P | P19642 | CC | This system is involved in maltose and glucose transport.                                                                                                                                  |
| P | P19642 | DE | Maltose and glucose permease IIC component;                                                                                                                                                |
| P | P19642 | DE | Maltose- and glucose-specific phosphotransferase enzyme IIB component;                                                                                                                     |
| P | P19642 | DE | PTS system maltose- and glucose-specific EIIB component;                                                                                                                                   |
| P | P19642 | DE | PTS system maltose- and glucose-specific EIIC component;                                                                                                                                   |
| P | P19642 | DE | PTS system maltose- and glucose-specific EIICB component;                                                                                                                                  |
| P | P19807 | CC | Sole choline transporter in yeast.                                                                                                                                                         |
| P | P19807 | DE | Choline transport protein;                                                                                                                                                                 |
| P | P19807 | DR | choline transmembrane transporter activity                                                                                                                                                 |
| P | P20020 | CC | This magnesium-dependent enzyme catalyzes the hydrolysis of ATP coupled with the transport of calcium out of the cell.                                                                     |
| P | P20020 | DE | Plasma membrane calcium ATPase isoform 1;                                                                                                                                                  |
| P | P20020 | DE | Plasma membrane calcium pump isoform 1;                                                                                                                                                    |
| P | P20020 | DE | Plasma membrane calcium-transporting ATPase 1;                                                                                                                                             |
| P | P20020 | DR | calcium-transporting ATPase activity                                                                                                                                                       |
| P | P20021 | CC | This electroneutral antiporter ejects one cadmium ion while accumulating two protons by an energy-dependent efflux mechanism.                                                              |
| P | P20021 | DE | Cadmium efflux ATPase;                                                                                                                                                                     |
| P | P20021 | DE | Probable cadmium-transporting ATPase;                                                                                                                                                      |
| P | P20021 | DR | cadmium-exporting ATPase activity                                                                                                                                                          |
| P | P20107 | CC | Probably responsible for the uptake of zinc and cadmium ions.                                                                                                                              |
| P | P20107 | CC | Probably responsible for the uptake of zinc and cadmium ions.                                                                                                                              |

|   |        |    |                                                                                                                                                                                                                                            |
|---|--------|----|--------------------------------------------------------------------------------------------------------------------------------------------------------------------------------------------------------------------------------------------|
| P | P20107 | DE | Zinc/cadmium resistance protein;                                                                                                                                                                                                           |
| P | P20107 | DE | Zinc/cadmium resistance protein;                                                                                                                                                                                                           |
| P | P20107 | DR | zinc ion transmembrane transporter activity                                                                                                                                                                                                |
| P | P20648 | CC | Catalyzes the hydrolysis of ATP coupled with the exchange of H <sup>+</sup> and K <sup>+</sup> ions across the plasma membrane                                                                                                             |
| P | P20648 | CC | Catalyzes the hydrolysis of ATP coupled with the exchange of H <sup>+</sup> and K <sup>+</sup> ions across the plasma membrane                                                                                                             |
| P | P20648 | DE | Gastric H <sup>+</sup> /K <sup>+</sup> ATPase subunit alpha;                                                                                                                                                                               |
| P | P20648 | DE | Gastric H <sup>+</sup> /K <sup>+</sup> ATPase subunit alpha;                                                                                                                                                                               |
| P | P20648 | DE | Potassium-transporting ATPase alpha chain 1;                                                                                                                                                                                               |
| P | P20648 | DR | hydrogen:potassium-exchanging ATPase activity                                                                                                                                                                                              |
| P | P20672 | DR | sodium:dicarboxylate symporter activity                                                                                                                                                                                                    |
| P | P20672 | DR | sodium:dicarboxylate symporter activity                                                                                                                                                                                                    |
| P | P21129 | DR | bile acid:sodium symporter activity                                                                                                                                                                                                        |
| P | P21129 | DR | bile acid:sodium symporter activity                                                                                                                                                                                                        |
| P | P21345 | CC | This carrier protein is part of the Na <sup>+</sup> -independent, binding-protein-independent glutamate-aspartate transport system.                                                                                                        |
| P | P21345 | DE | Glutamate-aspartate carrier protein;                                                                                                                                                                                                       |
| P | P21345 | DE | Proton glutamate symport protein;                                                                                                                                                                                                          |
| P | P21608 | CC | Uptake of citrate across the boundary membrane with the concomitant uptake of a sodium ion (symport system).                                                                                                                               |
| P | P21608 | CC | Uptake of citrate across the boundary membrane with the concomitant uptake of a sodium ion (symport system).                                                                                                                               |
| P | P21608 | DE | Citrate carrier protein;                                                                                                                                                                                                                   |
| P | P21608 | DE | Citrate transporter;                                                                                                                                                                                                                       |
| P | P21608 | DE | Citrate-sodium symporter;                                                                                                                                                                                                                  |
| P | P21817 | CC | Contraction of skeletal muscle is triggered by release of calcium ions from SR following depolarization of T-tubules.                                                                                                                      |
| P | P21817 | DE | Skeletal muscle calcium release channel;                                                                                                                                                                                                   |
| P | P21817 | DR | ryanodine-sensitive calcium-release channel activity                                                                                                                                                                                       |
| P | P21903 | DE | ATP synthase subunit a, sodium ion specific;                                                                                                                                                                                               |
| P | P21904 | CC | F(1)F(0) ATP synthase produces ATP from ADP in the presence of a proton or sodium gradient                                                                                                                                                 |
| P | P21904 | DE | ATP synthase subunit b, sodium ion specific;                                                                                                                                                                                               |
| P | P21905 | CC | During catalysis, ATP synthesis in the catalytic domain of F(1) is coupled via a rotary mechanism of the central stalk subunits to sodium translocation.                                                                                   |
| P | P21905 | CC | F(1)F(0) ATP synthase produces ATP from ADP in the presence of a proton or sodium gradient                                                                                                                                                 |
| P | P21905 | CC | F-type ATPases consist of two structural domains, F(1) containing the extramembraneous catalytic core and F(0) containing the membrane sodium channel, linked together by a central stalk and a peripheral stalk                           |
| P | P21905 | DE | ATP synthase subunit c, sodium ion specific;                                                                                                                                                                                               |
| P | P21906 | DE | Glucose facilitated diffusion protein;                                                                                                                                                                                                     |
| P | P22001 | CC | Assuming opened or closed conformations in response to the voltage difference across the membrane, the protein forms a potassium-selective channel through which potassium ions may pass in accordance with their electrochemical gradient |
| P | P22001 | CC | mediates the voltage-dependent potassium ion permeability of excitable membranes                                                                                                                                                           |
| P | P22001 | DE | Potassium voltage-gated channel subfamily A member 3;                                                                                                                                                                                      |
| P | P22001 | DE | Voltage-gated K <sup>+</sup> channel HuKIII;                                                                                                                                                                                               |
| P | P22001 | DE | Voltage-gated potassium channel subunit Kv1.3;                                                                                                                                                                                             |
| P | P22001 | DR | delayed rectifier potassium channel activity                                                                                                                                                                                               |
| P | P22152 | CC | Permease for nitrate uptake.                                                                                                                                                                                                               |
| P | P22152 | DE | Nitrate permease;                                                                                                                                                                                                                          |
| P | P22152 | DE | Nitrate transporter;                                                                                                                                                                                                                       |
| P | P22189 | CC | This magnesium-dependent enzyme catalyzes the hydrolysis of ATP coupled with the transport of the calcium.                                                                                                                                 |
| P | P22189 | DE | Calcium-transporting ATPase 3;                                                                                                                                                                                                             |
| P | P22189 | DR | calcium-transporting ATPase activity                                                                                                                                                                                                       |
| P | P22459 | CC | Assuming opened or closed conformations in response to the voltage difference across the membrane, the protein forms a potassium-selective channel through which potassium ions may pass in accordance with their electrochemical gradient |
| P | P22459 | CC | mediates the voltage-dependent potassium ion permeability of excitable membranes                                                                                                                                                           |
| P | P22459 | DE | Potassium voltage-gated channel subfamily A member 4;                                                                                                                                                                                      |
| P | P22459 | DE | Voltage-gated K <sup>+</sup> channel HuKII;                                                                                                                                                                                                |
| P | P22459 | DE | Voltage-gated potassium channel HBK4;                                                                                                                                                                                                      |

|   |        |    |                                                                                                                                                                                                                                            |
|---|--------|----|--------------------------------------------------------------------------------------------------------------------------------------------------------------------------------------------------------------------------------------------|
| P | P22459 | DE | Voltage-gated potassium channel HK1;                                                                                                                                                                                                       |
| P | P22459 | DE | Voltage-gated potassium channel subunit Kv1.4;                                                                                                                                                                                             |
| P | P22459 | DR | voltage-gated potassium channel activity                                                                                                                                                                                                   |
| P | P22460 | CC | Assuming opened or closed conformations in response to the voltage difference across the membrane, the protein forms a potassium-selective channel through which potassium ions may pass in accordance with their electrochemical gradient |
| P | P22460 | CC | mediates the voltage-dependent potassium ion permeability of excitable membranes                                                                                                                                                           |
| P | P22460 | DE | Potassium voltage-gated channel subfamily A member 5;                                                                                                                                                                                      |
| P | P22460 | DE | Voltage-gated potassium channel HK2;                                                                                                                                                                                                       |
| P | P22460 | DE | Voltage-gated potassium channel subunit Kv1.5;                                                                                                                                                                                             |
| P | P22460 | DR | delayed rectifier potassium channel activity                                                                                                                                                                                               |
| P | P22700 | CC | This magnesium-dependent enzyme catalyzes the hydrolysis of ATP coupled with the transport of calcium.                                                                                                                                     |
| P | P22700 | DE | Calcium pump;                                                                                                                                                                                                                              |
| P | P22700 | DE | Calcium-transporting ATPase sarcoplasmic/endoplasmic reticulum type;                                                                                                                                                                       |
| P | P22700 | DR | calcium-transporting ATPase activity                                                                                                                                                                                                       |
| P | P22723 | CC | GABA, the major inhibitory neurotransmitter in the vertebrate brain, mediates neuronal inhibition by binding to the GABA/benzodiazepine receptor and opening an integral chloride channel.                                                 |
| P | P22723 | DR | chloride channel activity                                                                                                                                                                                                                  |
| P | P22731 | CC | Component of the leucine-specific transport system.                                                                                                                                                                                        |
| P | P22732 | DE | Glucose transporter type 5, small intestine;                                                                                                                                                                                               |
| P | P22732 | DE | Solute carrier family 2, facilitated glucose transporter member 5;                                                                                                                                                                         |
| P | P22732 | DR | glucose transmembrane transporter activity                                                                                                                                                                                                 |
| P | P22933 | CC | GABA, the major inhibitory neurotransmitter in the vertebrate brain, mediates neuronal inhibition by binding to the GABA/benzodiazepine receptor and opening an integral chloride channel.                                                 |
| P | P22933 | DR | chloride channel activity                                                                                                                                                                                                                  |
| P | P23516 | CC | High-affinity nickel transporter responsible for nickel uptake                                                                                                                                                                             |
| P | P23516 | DE | High-affinity nickel transport protein;                                                                                                                                                                                                    |
| P | P23516 | DR | nickel ion transmembrane transporter activity                                                                                                                                                                                              |
| P | P23586 | CC | Can transport glucose, 3-O- methylglucose, fructose, xylose, mannose, galactose, fucose, 2- deoxyglucose and arabinose                                                                                                                     |
| P | P23586 | DE | Glucose transporter;                                                                                                                                                                                                                       |
| P | P23622 | CC | Uptake of sulfate into the cell.                                                                                                                                                                                                           |
| P | P23622 | DE | Sulfate permease 2;                                                                                                                                                                                                                        |
| P | P23622 | DE | Sulfate permease II;                                                                                                                                                                                                                       |
| P | P23622 | DR | secondary active sulfate transmembrane transporter activity                                                                                                                                                                                |
| P | P23634 | CC | This magnesium-dependent enzyme catalyzes the hydrolysis of ATP coupled with the transport of calcium out of the cell.                                                                                                                     |
| P | P23634 | DE | Plasma membrane calcium ATPase isoform 4;                                                                                                                                                                                                  |
| P | P23634 | DE | Plasma membrane calcium pump isoform 4;                                                                                                                                                                                                    |
| P | P23634 | DE | Plasma membrane calcium-transporting ATPase 4;                                                                                                                                                                                             |
| P | P23634 | DR | calcium-transporting ATPase activity                                                                                                                                                                                                       |
| P | P23900 | CC | Channel protein for glycerol                                                                                                                                                                                                               |
| P | P23900 | CC | Has a role in both glycerol influx and efflux                                                                                                                                                                                              |
| P | P23900 | CC | Plays a role in osmoregulation: under osmotic stress the channel is apparently closed to allow accumulation of glycerol in the cell under hyperosmotic conditions                                                                          |
| P | P23900 | DE | Glycerol uptake/efflux facilitator protein;                                                                                                                                                                                                |
| P | P23900 | DR | glycerol transmembrane transporter activity                                                                                                                                                                                                |
| P | P23936 | DE | Lactose permease;                                                                                                                                                                                                                          |
| P | P23936 | DE | Lactose transport protein;                                                                                                                                                                                                                 |
| P | P23936 | DE | Lactose-proton symporter;                                                                                                                                                                                                                  |
| P | P23975 | CC | Terminates the action of noradrenaline by its high affinity sodium-dependent reuptake into presynaptic terminals.                                                                                                                          |
| P | P23975 | CC | Terminates the action of noradrenaline by its high affinity sodium-dependent reuptake into presynaptic terminals.                                                                                                                          |
| P | P23975 | DE | Norepinephrine transporter;                                                                                                                                                                                                                |
| P | P23975 | DE | Sodium-dependent noradrenaline transporter;                                                                                                                                                                                                |
| P | P23975 | DE | Sodium-dependent noradrenaline transporter;                                                                                                                                                                                                |
| P | P23975 | DR | norepinephrine:sodium symporter activity                                                                                                                                                                                                   |
| P | P23975 | DR | norepinephrine:sodium symporter activity                                                                                                                                                                                                   |
| P | P24046 | CC | GABA, the major inhibitory neurotransmitter in the vertebrate brain, mediates neuronal inhibition by binding to the GABA/benzodiazepine receptor and opening an integral chloride channel                                                  |

|   |        |    |                                                                                                                                                                                            |
|---|--------|----|--------------------------------------------------------------------------------------------------------------------------------------------------------------------------------------------|
| P | P24046 | DR | chloride channel activity                                                                                                                                                                  |
| P | P24207 | CC | Permease that is involved in the transport across the cytoplasmic membrane of phenylalanine.                                                                                               |
| P | P24207 | DE | Phenylalanine-specific permease;                                                                                                                                                           |
| P | P24241 | CC | This system is involved in arbutin, cellobiose, and salicin transport.                                                                                                                     |
| P | P24241 | CC | This system is involved in arbutin, cellobiose, and salicin transport.                                                                                                                     |
| P | P24241 | CC | This system is involved in arbutin, cellobiose, and salicin transport.                                                                                                                     |
| P | P24241 | DE | Arbutin, cellobiose, and salicin permease IIC component;                                                                                                                                   |
| P | P24241 | DE | Arbutin, cellobiose, and salicin permease IIC component;                                                                                                                                   |
| P | P24241 | DE | Arbutin, cellobiose, and salicin permease IIC component;                                                                                                                                   |
| P | P24241 | DE | Arbutin-, cellobiose-, and salicin-specific phosphotransferase enzyme IID                                                                                                                  |
| P | P24241 | DE | Arbutin-, cellobiose-, and salicin-specific phosphotransferase enzyme IID                                                                                                                  |
| P | P24241 | DE | Arbutin-, cellobiose-, and salicin-specific phosphotransferase enzyme IID                                                                                                                  |
| P | P24241 | DE | PTS system arbutin-, cellobiose-, and salicin-specific EIIB component;                                                                                                                     |
| P | P24241 | DE | PTS system arbutin-, cellobiose-, and salicin-specific EIIB component;                                                                                                                     |
| P | P24241 | DE | PTS system arbutin-, cellobiose-, and salicin-specific EIIBC component;                                                                                                                    |
| P | P24241 | DE | PTS system arbutin-, cellobiose-, and salicin-specific EIIBC component;                                                                                                                    |
| P | P24241 | DE | PTS system arbutin-, cellobiose-, and salicin-specific EIIC component;                                                                                                                     |
| P | P24241 | DE | PTS system arbutin-, cellobiose-, and salicin-specific EIIC component;                                                                                                                     |
| P | P24585 | CC | Probable sodium channel subunit                                                                                                                                                            |
| P | P24585 | DR | sodium channel activity                                                                                                                                                                    |
| P | P24942 | CC | Acts as a symport by cotransporting sodium.                                                                                                                                                |
| P | P24942 | CC | Essential for terminating the postsynaptic action of glutamate by rapidly removing released glutamate from the synaptic cleft                                                              |
| P | P24942 | DE | Glial glutamate transporter;                                                                                                                                                               |
| P | P24942 | DE | Sodium-dependent glutamate/aspartate transporter 1;                                                                                                                                        |
| P | P24942 | DE | Sodium-dependent glutamate/aspartate transporter 1;                                                                                                                                        |
| P | P24942 | DE | Sodium-dependent glutamate/aspartate transporter 1;                                                                                                                                        |
| P | P24942 | DR | high-affinity glutamate transmembrane transporter activity                                                                                                                                 |
| P | P24942 | DR | sodium:dicarboxylate symporter activity                                                                                                                                                    |
| P | P24943 | CC | This carrier protein is part of the Na+-dependent, binding-protein-independent glutamate-aspartate transport system.                                                                       |
| P | P24943 | CC | This carrier protein is part of the Na+-dependent, binding-protein-independent glutamate-aspartate transport system.                                                                       |
| P | P24943 | DE | Glutamate-aspartate carrier protein;                                                                                                                                                       |
| P | P24943 | DE | Proton/sodium-glutamate symport protein;                                                                                                                                                   |
| P | P24943 | DR | sodium:dicarboxylate symporter activity                                                                                                                                                    |
| P | P25185 | CC | BraZ is specific for isoleucine and valine                                                                                                                                                 |
| P | P25185 | CC | BraZ is specific for isoleucine and valine                                                                                                                                                 |
| P | P25185 | CC | The LIV-III transport system may be H+-coupled.                                                                                                                                            |
| P | P25297 | CC | High-affinity transporter for external inorganic phosphate                                                                                                                                 |
| P | P25297 | DE | Inorganic phosphate transporter PHO84;                                                                                                                                                     |
| P | P25297 | DR | inorganic phosphate transmembrane transporter activity                                                                                                                                     |
| P | P25360 | CC | Involved in the uptake of inorganic phosphate.                                                                                                                                             |
| P | P25360 | DE | Inorganic phosphate transporter PHO87;                                                                                                                                                     |
| P | P25360 | DR | inorganic phosphate transmembrane transporter activity                                                                                                                                     |
| P | P25376 | CC | Broad substrate range permease which transports asparagine and glutamine with intermediate specificity                                                                                     |
| P | P25376 | CC | Broad substrate range permease which transports asparagine and glutamine with intermediate specificity                                                                                     |
| P | P25376 | DE | Asparagine/glutamine permease;                                                                                                                                                             |
| P | P25376 | DE | Asparagine/glutamine permease;                                                                                                                                                             |
| P | P25621 | CC | Transports pantothenate into the cell                                                                                                                                                      |
| P | P25621 | DE | Pantothenate transporter FEN2;                                                                                                                                                             |
| P | P25621 | DR | pantothenate transmembrane transporter activity                                                                                                                                            |
| P | P25737 | CC | Permease that is involved in the transport across the cytoplasmic membrane of lysine.                                                                                                      |
| P | P25737 | DE | Lysine-specific permease;                                                                                                                                                                  |
| P | P25818 | CC | Water channel required to facilitate the transport of water, diffusion of amino acids and/or peptides from the vacuolar compartment to the cytoplasm                                       |
| P | P25818 | DR | water channel activity                                                                                                                                                                     |
| P | P26048 | CC | GABA, the major inhibitory neurotransmitter in the vertebrate brain, mediates neuronal inhibition by binding to the GABA/benzodiazepine receptor and opening an integral chloride channel. |
| P | P26048 | DR | chloride channel activity                                                                                                                                                                  |

|   |        |    |                                                                                                                                                                                            |
|---|--------|----|--------------------------------------------------------------------------------------------------------------------------------------------------------------------------------------------|
| P | P26049 | CC | GABA, the major inhibitory neurotransmitter in the vertebrate brain, mediates neuronal inhibition by binding to the GABA/benzodiazepine receptor and opening an integral chloride channel. |
| P | P26049 | DR | chloride channel activity                                                                                                                                                                  |
| P | P26235 | CC | It can mediate sodium uptake when a transmembrane pH gradient is applied.                                                                                                                  |
| P | P26235 | CC | This is a Na <sup>+</sup> /H <sup>+</sup> antiporter                                                                                                                                       |
| P | P26235 | CC | This is a Na <sup>+</sup> /H <sup>+</sup> antiporter                                                                                                                                       |
| P | P26235 | DE | Na <sup>+</sup> /H <sup>+</sup> antiporter;                                                                                                                                                |
| P | P26235 | DE | Na <sup>+</sup> /H <sup>+</sup> antiporter;                                                                                                                                                |
| P | P26361 | CC | Involved in the transport of chloride ions                                                                                                                                                 |
| P | P26361 | DE | cAMP-dependent chloride channel;                                                                                                                                                           |
| P | P26426 | CC | This system is involved in lactose transport.                                                                                                                                              |
| P | P26426 | DE | Lactose-specific phosphotransferase enzyme IIA component;                                                                                                                                  |
| P | P26426 | DE | PTS system lactose-specific EIIA component;                                                                                                                                                |
| P | P26430 | CC | Actively transports uridine into cells by Na <sup>+</sup> cotransport                                                                                                                      |
| P | P26430 | DE | Na <sup>+</sup> /glucose cotransporter 2;                                                                                                                                                  |
| P | P26430 | DE | Na <sup>+</sup> /glucose cotransporter 2;                                                                                                                                                  |
| P | P26430 | DE | Sodium/nucleoside cotransporter;                                                                                                                                                           |
| P | P26430 | DE | Sodium/nucleoside cotransporter;                                                                                                                                                           |
| P | P26435 | CC | It is strictly dependent on the extracellular presence of sodium.                                                                                                                          |
| P | P26435 | CC | The hepatic sodium/bile acid uptake system exhibits broad substrate specificity and transports various non-bile acid organic compounds as well                                             |
| P | P26435 | CC | The hepatic sodium/bile acid uptake system exhibits broad substrate specificity and transports various non-bile acid organic compounds as well                                             |
| P | P26435 | DE | Na <sup>+</sup> /bile acid cotransporter;                                                                                                                                                  |
| P | P26435 | DE | Na <sup>+</sup> /bile acid cotransporter;                                                                                                                                                  |
| P | P26435 | DE | Na <sup>+</sup> /taurocholate transport protein;                                                                                                                                           |
| P | P26435 | DE | Sodium/bile acid cotransporter;                                                                                                                                                            |
| P | P26435 | DE | Sodium/bile acid cotransporter;                                                                                                                                                            |
| P | P26435 | DE | Sodium/taurocholate cotransporting polypeptide;                                                                                                                                            |
| P | P26435 | DR | bile acid:sodium symporter activity                                                                                                                                                        |
| P | P26435 | DR | bile acid:sodium symporter activity                                                                                                                                                        |
| P | P26467 | CC | Part of the binding-protein-dependent transport system for maltose; probably responsible for the translocation of the substrate across the membrane.                                       |
| P | P26467 | DE | Maltose transport system permease protein malF;                                                                                                                                            |
| P | P26468 | CC | Part of the binding-protein-dependent transport system for maltose; probably responsible for the translocation of the substrate across the membrane.                                       |
| P | P26468 | DE | Maltose transport system permease protein malG;                                                                                                                                            |
| P | P26587 | CC | Water channel required to facilitate the transport of water from the vacuolar compartment to the cytoplasm.                                                                                |
| P | P26903 | DE | Dipeptide transport system permease protein dppB;                                                                                                                                          |
| P | P26904 | DE | Dipeptide transport system permease protein dppC;                                                                                                                                          |
| P | P26905 | DE | Dipeptide transport ATP-binding protein DppD;                                                                                                                                              |
| P | P26906 | DE | Dipeptide-binding protein dppE;                                                                                                                                                            |
| P | P27135 | CC | Uptake of L-rhamnose across the boundary membrane with the concomitant transport of protons into the cell (symport system).                                                                |
| P | P27135 | DE | L-rhamnose-H <sup>+</sup> transport protein;                                                                                                                                               |
| P | P27135 | DE | L-rhamnose-proton symporter;                                                                                                                                                               |
| P | P27547 | CC | This system is involved in mannitol transport (By similarity).                                                                                                                             |
| P | P27547 | DE | Mannitol-specific phosphotransferase enzyme IIA component;                                                                                                                                 |
| P | P27547 | DE | PTS system mannitol-specific EIIA component;                                                                                                                                               |
| P | P27611 | CC | Involved in pH homeostasis and sodium extrusion.                                                                                                                                           |
| P | P27611 | CC | Na <sup>+</sup> /H <sup>+</sup> antiporter                                                                                                                                                 |
| P | P27611 | CC | Na <sup>+</sup> /H <sup>+</sup> antiporter                                                                                                                                                 |
| P | P27611 | DE | Na <sup>+</sup> /H <sup>+</sup> antiporter nhaC;                                                                                                                                           |
| P | P27611 | DE | Na <sup>+</sup> /H <sup>+</sup> antiporter nhaC;                                                                                                                                           |
| P | P27611 | DE | Sodium/hydrogen antiporter;                                                                                                                                                                |
| P | P27611 | DE | Sodium/proton antiporter;                                                                                                                                                                  |
| P | P27611 | DR | sodium:hydrogen antiporter activity                                                                                                                                                        |
| P | P28246 | CC | Involved in sulfonamide (sulfathiazole) and bicyclomycin resistance                                                                                                                        |
| P | P28246 | DE | Bicyclomycin resistance protein;                                                                                                                                                           |
| P | P28472 | CC | GABA, the major inhibitory neurotransmitter in the vertebrate brain, mediates neuronal inhibition by binding to the GABA/benzodiazepine receptor and opening an integral chloride channel. |
| P | P28472 | DR | chloride channel activity                                                                                                                                                                  |

|   |        |    |                                                                                                                                                                                                                       |
|---|--------|----|-----------------------------------------------------------------------------------------------------------------------------------------------------------------------------------------------------------------------|
| P | P28476 | CC | GABA, the major inhibitory neurotransmitter in the vertebrate brain, mediates neuronal inhibition by binding to the GABA/benzodiazepine receptor and opening an integral chloride channel                             |
| P | P28476 | DR | chloride channel activity                                                                                                                                                                                             |
| P | P28570 | DE | Sodium- and chloride-dependent creatine transporter 1;                                                                                                                                                                |
| P | P28570 | DR | choline transmembrane transporter activity                                                                                                                                                                            |
| P | P28570 | DR | creatine:sodium symporter activity                                                                                                                                                                                    |
| P | P28570 | DR | neurotransmitter:sodium symporter activity                                                                                                                                                                            |
| P | P28571 | CC | May play a role in regulation of glycine levels in NMDA receptor-mediated neurotransmission.                                                                                                                          |
| P | P28571 | CC | Terminates the action of glycine by its high affinity sodium-dependent reuptake into presynaptic terminals                                                                                                            |
| P | P28571 | CC | Terminates the action of glycine by its high affinity sodium-dependent reuptake into presynaptic terminals                                                                                                            |
| P | P28571 | DE | Sodium- and chloride-dependent glycine transporter 1;                                                                                                                                                                 |
| P | P28571 | DE | Sodium- and chloride-dependent glycine transporter 1;                                                                                                                                                                 |
| P | P28571 | DR | glycine transmembrane transporter activity                                                                                                                                                                            |
| P | P28571 | DR | neurotransmitter:sodium symporter activity                                                                                                                                                                            |
| P | P28571 | DR | sodium:amino acid symporter activity                                                                                                                                                                                  |
| P | P28572 | CC | Terminates the action of glycine by its high affinity sodium-dependent reuptake into presynaptic terminals                                                                                                            |
| P | P28572 | DE | Sodium- and chloride-dependent glycine transporter 1;                                                                                                                                                                 |
| P | P28572 | DR | neurotransmitter:sodium symporter activity                                                                                                                                                                            |
| P | P28572 | DR | sodium:amino acid symporter activity                                                                                                                                                                                  |
| P | P28573 | CC | Terminates the action of proline by its high affinity sodium-dependent reuptake into presynaptic terminals.                                                                                                           |
| P | P28573 | CC | Terminates the action of proline by its high affinity sodium-dependent reuptake into presynaptic terminals.                                                                                                           |
| P | P28573 | DE | Sodium-dependent proline transporter;                                                                                                                                                                                 |
| P | P28573 | DE | Sodium-dependent proline transporter;                                                                                                                                                                                 |
| P | P28573 | DR | neurotransmitter:sodium symporter activity                                                                                                                                                                            |
| P | P28584 | CC | This protein is required for low-affinity potassium transport.                                                                                                                                                        |
| P | P28584 | DE | Low-affinity potassium transport protein;                                                                                                                                                                             |
| P | P28584 | DR | potassium ion transmembrane transporter activity                                                                                                                                                                      |
| P | P28873 | CC | Confers resistance to benomyl and methotrexate.                                                                                                                                                                       |
| P | P28873 | CC | Confers resistance to benomyl and methotrexate.                                                                                                                                                                       |
| P | P28873 | DE | Benomyl/methotrexate resistance protein;                                                                                                                                                                              |
| P | P28873 | DE | Benomyl/methotrexate resistance protein;                                                                                                                                                                              |
| P | P29706 | CC | PRODUCES ATP FROM ADP IN THE PRESENCE OF A SODIUM ION GRADIENT ACROSS THE MEMBRANE                                                                                                                                    |
| P | P29706 | DE | ATP synthase subunit alpha, sodium ion specific;                                                                                                                                                                      |
| P | P29706 | DE | Na+-translocating ATPase subunit alpha;                                                                                                                                                                               |
| P | P29707 | CC | PRODUCES ATP FROM ADP IN THE PRESENCE OF A SODIUM ION GRADIENT ACROSS THE MEMBRANE                                                                                                                                    |
| P | P29707 | DE | ATP synthase subunit beta, sodium ion specific;                                                                                                                                                                       |
| P | P29707 | DE | Na+-translocating ATPase subunit beta;                                                                                                                                                                                |
| P | P29708 | CC | F(1)F(0) ATP synthase produces ATP from ADP in the presence of a proton or sodium gradient                                                                                                                            |
| P | P29708 | DE | ATP synthase subunit delta, sodium ion specific;                                                                                                                                                                      |
| P | P29709 | CC | PRODUCES ATP FROM ADP IN THE PRESENCE OF A SODIUM GRADIENT ACROSS THE MEMBRANE                                                                                                                                        |
| P | P29709 | DE | ATP synthase epsilon chain, sodium ion specific;                                                                                                                                                                      |
| P | P29709 | DE | F-ATPase epsilon subunit, sodium ion specific;                                                                                                                                                                        |
| P | P29709 | DE | Na+-translocating ATPase subunit epsilon;                                                                                                                                                                             |
| P | P29710 | DE | ATP synthase gamma chain, sodium ion specific;                                                                                                                                                                        |
| P | P29710 | DE | F-ATPase gamma subunit, sodium ion specific;                                                                                                                                                                          |
| P | P29822 | CC | Part of the binding-protein-dependent transport system for lactose.                                                                                                                                                   |
| P | P29822 | DE | Lactose-binding protein;                                                                                                                                                                                              |
| P | P29823 | CC | Part of the binding-protein-dependent transport system for lactose                                                                                                                                                    |
| P | P29823 | DE | Lactose transport system permease protein lacF;                                                                                                                                                                       |
| P | P29824 | CC | Part of the binding-protein-dependent transport system for lactose                                                                                                                                                    |
| P | P29824 | DE | Lactose transport system permease protein lacG;                                                                                                                                                                       |
| P | P29972 | CC | Forms a water-specific channel that provides the plasma membranes of red cells and kidney proximal tubules with high permeability to water, thereby permitting water to move in the direction of an osmotic gradient. |
| P | P29972 | DE | Urine water channel;                                                                                                                                                                                                  |
| P | P29972 | DE | Water channel protein for red blood cells and kidney proximal tubule;                                                                                                                                                 |
| P | P29972 | DR | water channel activity                                                                                                                                                                                                |

|   |        |    |                                                                                                                                                                                         |
|---|--------|----|-----------------------------------------------------------------------------------------------------------------------------------------------------------------------------------------|
| P | P30000 | CC | Has an essential role in sucrose metabolism.                                                                                                                                            |
| P | P30000 | DE | Sucrose permease;                                                                                                                                                                       |
| P | P30000 | DE | Sucrose transport protein;                                                                                                                                                              |
| P | P30144 | CC | Catalyzes the sodium-dependent uptake of extracellular D-alanine and glycine.                                                                                                           |
| P | P30144 | DE | Na <sup>+</sup> -linked D-alanine glycine permease;                                                                                                                                     |
| P | P30144 | DR | sodium:amino acid symporter activity                                                                                                                                                    |
| P | P30145 | CC | Protein responsible for alanine transport                                                                                                                                               |
| P | P30145 | CC | Uses hydrogen and sodium cations as coupling cations for cotransport.                                                                                                                   |
| P | P30145 | DE | Sodium/proton-dependent alanine carrier protein;                                                                                                                                        |
| P | P30145 | DE | Sodium/proton-dependent alanine carrier protein;                                                                                                                                        |
| P | P30145 | DR | sodium:amino acid symporter activity                                                                                                                                                    |
| P | P30301 | CC | Water channel                                                                                                                                                                           |
| P | P30302 | CC | Water channel required to facilitate the transport of water across cell membrane; mercury-insensitive.                                                                                  |
| P | P30302 | DE | Water stress-induced tonoplast intrinsic protein;                                                                                                                                       |
| P | P30302 | DR | water channel activity                                                                                                                                                                  |
| P | P30329 | CC | Thought to form the channel of an arsenite pump.                                                                                                                                        |
| P | P30329 | DR | arsenite transmembrane transporter activity                                                                                                                                             |
| P | P30531 | CC | Terminates the action of GABA by its high affinity sodium-dependent reuptake into presynaptic terminals.                                                                                |
| P | P30531 | CC | Terminates the action of GABA by its high affinity sodium-dependent reuptake into presynaptic terminals.                                                                                |
| P | P30531 | DE | Sodium- and chloride-dependent GABA transporter 1;                                                                                                                                      |
| P | P30531 | DE | Sodium- and chloride-dependent GABA transporter 1;                                                                                                                                      |
| P | P30531 | DR | gamma-aminobutyric acid:sodium symporter activity                                                                                                                                       |
| P | P30531 | DR | gamma-aminobutyric acid:sodium symporter activity                                                                                                                                       |
| P | P30531 | DR | neurotransmitter:sodium symporter activity                                                                                                                                              |
| P | P30605 | CC | Major transporter for myo-inositol.                                                                                                                                                     |
| P | P30605 | DE | Myo-inositol transporter 1;                                                                                                                                                             |
| P | P30605 | DR | myo-inositol transmembrane transporter activity                                                                                                                                         |
| P | P30606 | CC | Minor transporter for myo-inositol.                                                                                                                                                     |
| P | P30606 | DE | Myo-inositol transporter 2;                                                                                                                                                             |
| P | P30606 | DR | myo-inositol transmembrane transporter activity                                                                                                                                         |
| P | P30859 | CC | Part of the ABC transporter complex ArtPIQMJ involved in arginine transport.                                                                                                            |
| P | P30859 | DE | Putative ABC transporter arginine-binding protein 2;                                                                                                                                    |
| P | P30860 | CC | Part of the ABC transporter complex ArtPIQMJ involved in arginine transport                                                                                                             |
| P | P30860 | DE | ABC transporter arginine-binding protein 1;                                                                                                                                             |
| P | P30878 | CC | Responsible for melibiose transport                                                                                                                                                     |
| P | P30878 | DE | Melibiose carrier protein;                                                                                                                                                              |
| P | P30878 | DE | Melibiose permease;                                                                                                                                                                     |
| P | P30878 | DE | Melibiose transporter;                                                                                                                                                                  |
| P | P30878 | DE | Na <sup>+</sup> (Li <sup>+</sup> )/melibiose symporter;                                                                                                                                 |
| P | P30962 | CC | Required for the export of heme to the periplasm for the biogenesis of c-type cytochromes.                                                                                              |
| P | P30962 | DE | Heme exporter protein C;                                                                                                                                                                |
| P | P30962 | DR | heme transporter activity                                                                                                                                                               |
| P | P30963 | CC | Part of the ABC transporter complex CcmAB involved in the biogenesis of c-type cytochromes; once thought to export heme, this seems not to be the case, but its exact role is uncertain |
| P | P30963 | DE | Heme exporter protein A;                                                                                                                                                                |
| P | P30963 | DR | heme-transporting ATPase activity                                                                                                                                                       |
| P | P30964 | CC | Required for the export of heme to the periplasm for the biogenesis of c-type cytochromes.                                                                                              |
| P | P30964 | DE | Heme exporter protein B;                                                                                                                                                                |
| P | P30964 | DR | heme transporter activity                                                                                                                                                               |
| P | P31133 | CC | Required for the activity of the bacterial periplasmic transport system of putrescine                                                                                                   |
| P | P31133 | DE | Putrescine-binding periplasmic protein;                                                                                                                                                 |
| P | P31133 | DR | putrescine-importing ATPase activity                                                                                                                                                    |
| P | P31134 | CC | Part of the binding-protein-dependent transport system for putrescine                                                                                                                   |
| P | P31134 | DE | Putrescine transport ATP-binding protein PotG;                                                                                                                                          |
| P | P31134 | DR | putrescine-importing ATPase activity                                                                                                                                                    |
| P | P31135 | CC | Required for the activity of the bacterial periplasmic transport system of putrescine                                                                                                   |
| P | P31135 | DE | Putrescine transport system permease protein PotH;                                                                                                                                      |
| P | P31135 | DR | putrescine-importing ATPase activity                                                                                                                                                    |

|   |        |    |                                                                                                                                                                           |
|---|--------|----|---------------------------------------------------------------------------------------------------------------------------------------------------------------------------|
| P | P31140 | CC | transporter of glycerol across the cytoplasmic membrane, with limited permeability to water and small uncharged compounds such as polyols (By similarity)                 |
| P | P31140 | DE | Glycerol uptake facilitator protein;                                                                                                                                      |
| P | P31141 | DE | Chloramphenicol resistance protein;                                                                                                                                       |
| P | P31167 | CC | Catalyzes the exchange of ADP and ATP across the mitochondrial inner membrane                                                                                             |
| P | P31167 | CC | Catalyzes the exchange of ADP and ATP across the mitochondrial inner membrane                                                                                             |
| P | P31167 | DE | ADP,ATP carrier protein 1, mitochondrial;                                                                                                                                 |
| P | P31167 | DE | ADP/ATP translocase 1;                                                                                                                                                    |
| P | P31167 | DE | ADP/ATP translocase 1;                                                                                                                                                    |
| P | P31167 | DR | ATP:ADP antiporter activity                                                                                                                                               |
| P | P31167 | DR | ATP:ADP antiporter activity                                                                                                                                               |
| P | P31414 | CC | Contributes to the transtonoplast (from cytosol to vacuole lumen) H <sup>+</sup> -electrochemical potential difference                                                    |
| P | P31414 | CC | It establishes a proton gradient of similar and often greater magnitude than the H <sup>+</sup> -ATPase on the same membrane                                              |
| P | P31414 | DE | H <sup>+</sup> -PPase 1;                                                                                                                                                  |
| P | P31436 | CC | The physiological role may be the detoxification of non-metabolizable sugar analogs                                                                                       |
| P | P31436 | DE | Sugar efflux transporter C;                                                                                                                                               |
| P | P31436 | DR | sugar efflux transmembrane transporter activity                                                                                                                           |
| P | P31499 | CC | This protein is involved in the initial step of iron uptake by binding nemtin, an iron chelatin siderophore that allows the bacteria to extract iron from the environment |
| P | P31499 | DE | Hemin receptor;                                                                                                                                                           |
| P | P31548 | CC | Part of the ABC transporter complex ThiBPQ involved in thiamine import                                                                                                    |
| P | P31548 | DE | Thiamine import ATP-binding protein ThiQ;                                                                                                                                 |
| P | P31549 | CC | Part of the ABC transporter complex thiBPQ involved in thiamine import                                                                                                    |
| P | P31549 | DE | Thiamine transport system permease protein thiP;                                                                                                                          |
| P | P31550 | CC | Part of the ABC transporter complex thiBPQ involved in thiamine import.                                                                                                   |
| P | P31550 | DE | Thiamine-binding periplasmic protein;                                                                                                                                     |
| P | P31553 | DR | carnitine transporter activity                                                                                                                                            |
| P | P31596 | CC | Acts as a symport by cotransporting sodium.                                                                                                                               |
| P | P31596 | CC | Essential for terminating the postsynaptic action of glutamate by rapidly removing released glutamate from the synaptic cleft                                             |
| P | P31596 | DE | Sodium-dependent glutamate/aspartate transporter 2;                                                                                                                       |
| P | P31596 | DE | Sodium-dependent glutamate/aspartate transporter 2;                                                                                                                       |
| P | P31596 | DR | high-affinity glutamate transmembrane transporter activity                                                                                                                |
| P | P31596 | DR | sodium:dicarboxylate symporter activity                                                                                                                                   |
| P | P31602 | CC | Uptake of citrate across the boundary membrane with the concomitant uptake of a sodium ion (symport system).                                                              |
| P | P31602 | CC | Uptake of citrate across the boundary membrane with the concomitant uptake of a sodium ion (symport system).                                                              |
| P | P31602 | DE | Citrate carrier protein;                                                                                                                                                  |
| P | P31602 | DE | Citrate transporter;                                                                                                                                                      |
| P | P31602 | DE | Citrate-sodium symporter;                                                                                                                                                 |
| P | P31636 | CC | Has a Na <sup>+</sup> to glucose coupling ratio of 1:1.                                                                                                                   |
| P | P31636 | CC | Has a Na <sup>+</sup> to glucose coupling ratio of 1:1.                                                                                                                   |
| P | P31636 | CC | Sodium-dependent glucose transporter                                                                                                                                      |
| P | P31636 | CC | Sodium-dependent glucose transporter                                                                                                                                      |
| P | P31636 | DE | Low affinity sodium-glucose cotransporter;                                                                                                                                |
| P | P31636 | DE | Na <sup>+</sup> /glucose cotransporter 3;                                                                                                                                 |
| P | P31636 | DE | Na <sup>+</sup> /glucose cotransporter 3;                                                                                                                                 |
| P | P31636 | DE | Sodium/glucose cotransporter 3;                                                                                                                                           |
| P | P31636 | DE | Sodium/glucose cotransporter 3;                                                                                                                                           |
| P | P31639 | CC | Has a Na <sup>+</sup> to glucose coupling ratio of 1:1.                                                                                                                   |
| P | P31639 | CC | Has a Na <sup>+</sup> to glucose coupling ratio of 1:1.                                                                                                                   |
| P | P31639 | CC | Sodium-dependent glucose transporter                                                                                                                                      |
| P | P31639 | CC | Sodium-dependent glucose transporter                                                                                                                                      |
| P | P31639 | DE | Low affinity sodium-glucose cotransporter;                                                                                                                                |
| P | P31639 | DE | Na <sup>+</sup> /glucose cotransporter 2;                                                                                                                                 |
| P | P31639 | DE | Na <sup>+</sup> /glucose cotransporter 2;                                                                                                                                 |
| P | P31639 | DE | Sodium/glucose cotransporter 2;                                                                                                                                           |
| P | P31639 | DE | Sodium/glucose cotransporter 2;                                                                                                                                           |
| P | P31639 | DR | low-affinity glucose:sodium symporter activity                                                                                                                            |
| P | P31639 | DR | low-affinity glucose:sodium symporter activity                                                                                                                            |
| P | P31641 | CC | Chloride ions are necessary for optimal uptake.                                                                                                                           |
| P | P31641 | CC | Required for the uptake of taurine                                                                                                                                        |



|   |        |    |                                                                                                                                                                                                                                                  |
|---|--------|----|--------------------------------------------------------------------------------------------------------------------------------------------------------------------------------------------------------------------------------------------------|
| P | P31641 | CC | Transports both taurine and beta-alanine which requires sodium ions                                                                                                                                                                              |
| P | P31641 | CC | Transports both taurine and beta-alanine which requires sodium ions                                                                                                                                                                              |
| P | P31641 | DE | Sodium- and chloride-dependent taurine transporter;                                                                                                                                                                                              |
| P | P31641 | DE | Sodium- and chloride-dependent taurine transporter;                                                                                                                                                                                              |
| P | P31641 | DE | Sodium- and chloride-dependent taurine transporter;                                                                                                                                                                                              |
| P | P31641 | DR | neurotransmitter:sodium symporter activity                                                                                                                                                                                                       |
| P | P31641 | DR | taurine:sodium symporter activity                                                                                                                                                                                                                |
| P | P31641 | DR | taurine:sodium symporter activity                                                                                                                                                                                                                |
| P | P31644 | CC | GABA, the major inhibitory neurotransmitter in the vertebrate brain, mediates neuronal inhibition by binding to the GABA/benzodiazepine receptor and opening an integral chloride channel.                                                       |
| P | P31644 | DR | chloride channel activity                                                                                                                                                                                                                        |
| P | P31645 | CC | Plays a key role in mediating regulation of the availability of serotonin to other receptors of serotonergic systems                                                                                                                             |
| P | P31645 | CC | Serotonin transporter whose primary function in the central nervous system involves the regulation of serotonergic signaling via transport of serotonin molecules from the synaptic cleft back into the pre-synaptic terminal for re-utilization |
| P | P31645 | CC | Terminates the action of serotonin and recycles it in a sodium-dependent manner.                                                                                                                                                                 |
| P | P31645 | CC | Terminates the action of serotonin and recycles it in a sodium-dependent manner.                                                                                                                                                                 |
| P | P31645 | DE | Sodium-dependent serotonin transporter;                                                                                                                                                                                                          |
| P | P31645 | DE | Sodium-dependent serotonin transporter;                                                                                                                                                                                                          |
| P | P31645 | DR | serotonin transmembrane transporter activity                                                                                                                                                                                                     |
| P | P31645 | DR | serotonin:sodium symporter activity                                                                                                                                                                                                              |
| P | P31645 | DR | serotonin:sodium symporter activity                                                                                                                                                                                                              |
| P | P31648 | CC | Terminates the action of GABA by its high affinity sodium-dependent reuptake into presynaptic terminals.                                                                                                                                         |
| P | P31648 | CC | Terminates the action of GABA by its high affinity sodium-dependent reuptake into presynaptic terminals.                                                                                                                                         |
| P | P31648 | DE | Sodium- and chloride-dependent GABA transporter 1;                                                                                                                                                                                               |
| P | P31648 | DE | Sodium- and chloride-dependent GABA transporter 1;                                                                                                                                                                                               |
| P | P31648 | DR | neurotransmitter:sodium symporter activity                                                                                                                                                                                                       |
| P | P31649 | CC | Terminates the action of GABA by its high affinity sodium-dependent reuptake into presynaptic terminals                                                                                                                                          |
| P | P31649 | CC | Terminates the action of GABA by its high affinity sodium-dependent reuptake into presynaptic terminals                                                                                                                                          |
| P | P31649 | DE | Sodium- and chloride-dependent GABA transporter 2;                                                                                                                                                                                               |
| P | P31649 | DE | Sodium- and chloride-dependent GABA transporter 2;                                                                                                                                                                                               |
| P | P31649 | DE | Sodium- and chloride-dependent GABA transporter 3;                                                                                                                                                                                               |
| P | P31649 | DE | Sodium- and chloride-dependent GABA transporter 3;                                                                                                                                                                                               |
| P | P31649 | DR | neurotransmitter:sodium symporter activity                                                                                                                                                                                                       |
| P | P31661 | DE | Sodium- and chloride-dependent creatine transporter 1;                                                                                                                                                                                           |
| P | P31661 | DR | creatine:sodium symporter activity                                                                                                                                                                                                               |
| P | P31661 | DR | neurotransmitter:sodium symporter activity                                                                                                                                                                                                       |
| P | P31675 | CC | Can transport IPTG, lactose and glucose                                                                                                                                                                                                          |
| P | P31675 | CC | The physiological role may be the detoxification of non-metabolizable sugar analogs                                                                                                                                                              |
| P | P31675 | DE | Sugar efflux transporter A;                                                                                                                                                                                                                      |
| P | P31675 | DR | sugar efflux transmembrane transporter activity                                                                                                                                                                                                  |
| P | P31728 | CC | This protein is a component of a D-methionine permease, a binding protein-dependent, ATP-driven transport system (By similarity).                                                                                                                |
| P | P31728 | DE | Probable D-methionine-binding lipoprotein metQ;                                                                                                                                                                                                  |
| P | P32010 | CC | Part of the ABC transporter complex DrrAB involved in daunorubicin and doxorubicin resistance                                                                                                                                                    |
| P | P32010 | DE | Daunorubicin/doxorubicin resistance ATP-binding protein DrrA;                                                                                                                                                                                    |
| P | P32010 | DE | Daunorubicin/doxorubicin resistance ATP-binding protein DrrA;                                                                                                                                                                                    |
| P | P32011 | CC | Part of the ABC transporter complex drrAB involved in daunorubicin and doxorubicin resistance                                                                                                                                                    |
| P | P32011 | DE | Daunorubicin/doxorubicin resistance ABC transporter permease protein drrB;                                                                                                                                                                       |
| P | P32011 | DE | Daunorubicin/doxorubicin resistance ABC transporter permease protein drrB;                                                                                                                                                                       |
| P | P32015 | CC | May form an ATP-driven capsule polysaccharide export apparatus, in association with the CtrB and CtrD proteins.                                                                                                                                  |
| P | P32015 | DE | Capsule polysaccharide export inner-membrane protein CtrC;                                                                                                                                                                                       |
| P | P32016 | CC | Putative ATP-binding protein, and an energy-coupling component of capsule polysaccharide export apparatus.                                                                                                                                       |
| P | P32016 | DE | Capsule polysaccharide export ATP-binding protein CtrD;                                                                                                                                                                                          |
| P | P32037 | CC | Facilitative glucose transporter                                                                                                                                                                                                                 |

|   |        |    |                                                                                                                                                                    |
|---|--------|----|--------------------------------------------------------------------------------------------------------------------------------------------------------------------|
| P | P32037 | CC | Probably a neuronal glucose transporter.                                                                                                                           |
| P | P32037 | DE | Glucose transporter type 3, brain;                                                                                                                                 |
| P | P32037 | DE | Solute carrier family 2, facilitated glucose transporter member 3;                                                                                                 |
| P | P32037 | DR | D-glucose transmembrane transporter activity                                                                                                                       |
| P | P32071 | CC | Confers resistance to cycloheximide.                                                                                                                               |
| P | P32071 | DE | Cycloheximide resistance protein;                                                                                                                                  |
| P | P32113 | CC | Probably involved in copper import under copper limiting conditions.                                                                                               |
| P | P32113 | DE | Probable copper-importing P-type ATPase A;                                                                                                                         |
| P | P32113 | DR | copper-exporting ATPase activity                                                                                                                                   |
| P | P32332 | CC | Transports oxaloacetate and sulfate.                                                                                                                               |
| P | P32332 | DE | Mitochondrial oxaloacetate transport protein;                                                                                                                      |
| P | P32332 | DR | oxaloacetate secondary active transmembrane transporter activity                                                                                                   |
| P | P32332 | DR | secondary active sulfate transmembrane transporter activity                                                                                                        |
| P | P32369 | DE | Bile acid transporter;                                                                                                                                             |
| P | P32467 | CC | Can also transport xylose.                                                                                                                                         |
| P | P32482 | DE | Chloramphenicol resistance protein;                                                                                                                                |
| P | P32487 | CC | High-affinity permease for lysine.                                                                                                                                 |
| P | P32487 | DE | Lysine-specific permease;                                                                                                                                          |
| P | P32739 | CC | High-affinity sodium-dicarboxylate cotransporter that accepts a range of tricarboxylic acid-cycle intermediates with 4-5 carbon atoms                              |
| P | P32739 | DE | Na <sup>+</sup> /dicarboxylate cotransporter 2;                                                                                                                    |
| P | P32739 | DE | Na <sup>+</sup> /dicarboxylate cotransporter 2;                                                                                                                    |
| P | P32739 | DE | Sodium-dependent high-affinity dicarboxylate transporter 2;                                                                                                        |
| P | P32739 | DE | Sodium-dependent high-affinity dicarboxylate transporter 2;                                                                                                        |
| P | P32798 | DR | cobalt ion transmembrane transporter activity                                                                                                                      |
| P | P32798 | DR | zinc ion transmembrane transporter activity                                                                                                                        |
| P | P32804 | CC | High-affinity zinc transport protein.                                                                                                                              |
| P | P32804 | DE | High-affinity zinc transport protein ZRT1;                                                                                                                         |
| P | P32804 | DE | Zinc-regulated transporter 1;                                                                                                                                      |
| P | P32804 | DR | high affinity zinc uptake transmembrane transporter activity                                                                                                       |
| P | P32837 | CC | Required for high-affinity, high-specificity GABA transport                                                                                                        |
| P | P32837 | DE | GABA-specific permease;                                                                                                                                            |
| P | P32837 | DE | GABA-specific transport protein;                                                                                                                                   |
| P | P32837 | DR | gamma-aminobutyric acid:hydrogen symporter activity                                                                                                                |
| P | P32977 | CC | Porin O has a higher affinity for polyphosphates (tripolyphosphate and pyrophosphate) while porin P has a higher affinity for orthophosphate.                      |
| P | P33026 | CC | Can transport lactose and glucose.                                                                                                                                 |
| P | P33026 | CC | The physiological role may be the detoxification of non-metabolizable sugar analogues                                                                              |
| P | P33026 | DE | Sugar efflux transporter B;                                                                                                                                        |
| P | P33026 | DR | sugar efflux transmembrane transporter activity                                                                                                                    |
| P | P33027 | CC | The physiological role may be the detoxification of non-metabolizable sugar analogues                                                                              |
| P | P33027 | DE | Sugar efflux transporter B;                                                                                                                                        |
| P | P33027 | DR | sugar efflux transmembrane transporter activity                                                                                                                    |
| P | P33231 | DR | lactate transmembrane transporter activity                                                                                                                         |
| P | P33303 | CC | transports cytoplasmic succinate, derived from isocitrate by the action of isocitrate lyase in the cytosol, into the mitochondrial matrix in exchange for fumarate |
| P | P33303 | CC | transports cytoplasmic succinate, derived from isocitrate by the action of isocitrate lyase in the cytosol, into the mitochondrial matrix in exchange for fumarate |
| P | P33303 | DE | Succinate/fumarate mitochondrial transporter;                                                                                                                      |
| P | P33303 | DE | Succinate/fumarate mitochondrial transporter;                                                                                                                      |
| P | P33303 | DR | succinate:fumarate antiporter activity                                                                                                                             |
| P | P33303 | DR | succinate:fumarate antiporter activity                                                                                                                             |
| P | P33413 | CC | Required for active transport of urea.                                                                                                                             |
| P | P33413 | DE | Urea active transporter;                                                                                                                                           |
| P | P33413 | DR | urea transmembrane transporter activity                                                                                                                            |
| P | P33532 | CC | Also imports, but does not export, amiloride and so confers sensitivity.                                                                                           |
| P | P33532 | DE | Amiloride transporter car1;                                                                                                                                        |
| P | P33532 | DE | Changed amiloride resistance protein 1;                                                                                                                            |
| P | P33590 | CC | Involved in a nickel transport system, probably represents the nickel binder.                                                                                      |
| P | P33590 | DE | Nickel-binding periplasmic protein;                                                                                                                                |
| P | P33591 | CC | Involved in a nickel transport system, probably translocates nickel through the bacterial inner membrane.                                                          |
| P | P33591 | DE | Nickel transport system permease protein nikB;                                                                                                                     |
| P | P33593 | CC | Part of the ABC transporter complex NikABCDE involved in nickel import                                                                                             |
| P | P33593 | DE | Nickel import ATP-binding protein NikD;                                                                                                                            |

|   |        |    |                                                                                                                                                                                                                                                |
|---|--------|----|------------------------------------------------------------------------------------------------------------------------------------------------------------------------------------------------------------------------------------------------|
| P | P33593 | DR | nickel-transporting ATPase activity                                                                                                                                                                                                            |
| P | P33594 | CC | Part of the ABC transporter complex NikABCDE involved in nickel import                                                                                                                                                                         |
| P | P33594 | DE | Nickel import ATP-binding protein NikE;                                                                                                                                                                                                        |
| P | P33594 | DR | nickel-transporting ATPase activity                                                                                                                                                                                                            |
| P | P33951 | CC | ATP-driven efflux pump necessary for the secretion of syringomycin                                                                                                                                                                             |
| P | P33951 | CC | May specifically bind syringomycin and translocate it to the periplasmic space                                                                                                                                                                 |
| P | P34230 | DE | Peroxisomal long-chain fatty acid import protein 1;                                                                                                                                                                                            |
| P | P34315 | DE | Na <sup>+</sup> /Ca <sup>2+</sup> -exchange protein 6;                                                                                                                                                                                         |
| P | P34315 | DE | Na <sup>+</sup> /Ca <sup>2+</sup> -exchange protein 6;                                                                                                                                                                                         |
| P | P34315 | DE | Putative sodium/calcium exchanger 6;                                                                                                                                                                                                           |
| P | P34315 | DE | Putative sodium/calcium exchanger 6;                                                                                                                                                                                                           |
| P | P34322 | DE | Na <sup>+</sup> /Ca <sup>2+</sup> -exchange protein 7;                                                                                                                                                                                         |
| P | P34322 | DE | Na <sup>+</sup> /Ca <sup>2+</sup> -exchange protein 7;                                                                                                                                                                                         |
| P | P34322 | DE | Putative sodium/calcium exchanger 7;                                                                                                                                                                                                           |
| P | P34322 | DE | Putative sodium/calcium exchanger 7;                                                                                                                                                                                                           |
| P | P34410 | DE | TWIK family of potassium channels protein 7;                                                                                                                                                                                                   |
| P | P34410 | DR | potassium channel activity                                                                                                                                                                                                                     |
| P | P34711 | CC | Involved in acetylcholine transport into synaptic vesicles.                                                                                                                                                                                    |
| P | P34711 | DE | Vesicular acetylcholine transporter unc-17;                                                                                                                                                                                                    |
| P | P34711 | DR | acetylcholine transmembrane transporter activity                                                                                                                                                                                               |
| P | P34903 | CC | GABA, the major inhibitory neurotransmitter in the vertebrate brain, mediates neuronal inhibition by binding to the GABA/benzodiazepine receptor and opening an integral chloride channel.                                                     |
| P | P34903 | DR | chloride channel activity                                                                                                                                                                                                                      |
| P | P35113 | CC | Component of the nopaline active transport system probably consisting of four subunits: Q, M, P and T                                                                                                                                          |
| P | P35113 | CC | This system is also capable of transporting octopine provided that catabolic functions are induced with nopaline.                                                                                                                              |
| P | P35113 | CC | This system is also capable of transporting octopine provided that catabolic functions are induced with nopaline.                                                                                                                              |
| P | P35113 | DE | Nopaline transport system permease protein nocM;                                                                                                                                                                                               |
| P | P35114 | CC | Component of the octopine active transport system probably consisting of four subunits: Q, M, P and T.                                                                                                                                         |
| P | P35114 | DE | Octopine transport system permease protein occM;                                                                                                                                                                                               |
| P | P35116 | CC | Component of the nopaline active transport system probably consisting of four subunits: Q, M, P and T                                                                                                                                          |
| P | P35116 | CC | This system is also capable of transporting octopine provided that catabolic functions are induced with nopaline.                                                                                                                              |
| P | P35116 | CC | This system is also capable of transporting octopine provided that catabolic functions are induced with nopaline.                                                                                                                              |
| P | P35116 | DE | Nopaline permease ATP-binding protein P;                                                                                                                                                                                                       |
| P | P35118 | CC | Component of the nopaline active transport system probably consisting of four subunits: Q, M, P and T                                                                                                                                          |
| P | P35118 | CC | This system is also capable of transporting octopine provided that catabolic functions are induced with nopaline.                                                                                                                              |
| P | P35118 | CC | This system is also capable of transporting octopine provided that catabolic functions are induced with nopaline.                                                                                                                              |
| P | P35118 | DE | Nopaline transport system permease protein nocQ;                                                                                                                                                                                               |
| P | P35120 | CC | Component of the nopaline active transport system probably consisting of four subunits: Q, M, P and T                                                                                                                                          |
| P | P35120 | CC | This system is also capable of transporting octopine provided that catabolic functions are induced with nopaline.                                                                                                                              |
| P | P35120 | CC | This system is also capable of transporting octopine provided that catabolic functions are induced with nopaline.                                                                                                                              |
| P | P35120 | DE | Nopaline-binding periplasmic protein;                                                                                                                                                                                                          |
| P | P35449 | DE | Na <sup>+</sup> -H <sup>+</sup> exchanger protein 9;                                                                                                                                                                                           |
| P | P35449 | DE | Probable Na <sup>+</sup> /H <sup>+</sup> antiporter nhx-9;                                                                                                                                                                                     |
| P | P35449 | DR | sodium:hydrogen antiporter activity                                                                                                                                                                                                            |
| P | P35498 | CC | Assuming opened or closed conformations in response to the voltage difference across the membrane, the protein forms a sodium-selective channel through which Na <sup>+</sup> ions may pass in accordance with their electrochemical gradient. |
| P | P35498 | CC | Mediates the voltage-dependent sodium ion permeability of excitable membranes                                                                                                                                                                  |
| P | P35498 | DE | Sodium channel protein brain I subunit alpha;                                                                                                                                                                                                  |
| P | P35498 | DE | Sodium channel protein type I subunit alpha;                                                                                                                                                                                                   |
| P | P35498 | DE | Sodium channel protein type I subunit alpha;                                                                                                                                                                                                   |

|   |        |    |                                                                                                                                                                                                                                               |
|---|--------|----|-----------------------------------------------------------------------------------------------------------------------------------------------------------------------------------------------------------------------------------------------|
| P | P35498 | DE | Voltage-gated sodium channel subunit alpha Nav1.1;                                                                                                                                                                                            |
| P | P35498 | DR | voltage-gated sodium channel activity                                                                                                                                                                                                         |
| P | P35499 | CC | Assuming opened or closed conformations in response to the voltage difference across the membrane, the protein forms a sodium-selective channel through which Na <sup>+</sup> ions may pass in accordance with their electrochemical gradient |
| P | P35499 | CC | This protein mediates the voltage-dependent sodium ion permeability of excitable membranes                                                                                                                                                    |
| P | P35499 | CC | This sodium channel may be present in both denervated and innervated skeletal muscle                                                                                                                                                          |
| P | P35499 | DE | Sodium channel protein skeletal muscle subunit alpha;                                                                                                                                                                                         |
| P | P35499 | DE | Sodium channel protein type 4 subunit alpha;                                                                                                                                                                                                  |
| P | P35499 | DE | Sodium channel protein type IV subunit alpha;                                                                                                                                                                                                 |
| P | P35499 | DE | Voltage-gated sodium channel subunit alpha Nav1.4;                                                                                                                                                                                            |
| P | P35499 | DR | voltage-gated sodium channel activity                                                                                                                                                                                                         |
| P | P35523 | CC | Chloride channels have several functions including the regulation of cell volume; membrane potential stabilization, signal transduction and transepithelial transport                                                                         |
| P | P35523 | CC | Voltage-gated chloride channel                                                                                                                                                                                                                |
| P | P35523 | DE | Chloride channel protein 1;                                                                                                                                                                                                                   |
| P | P35523 | DE | Chloride channel protein, skeletal muscle;                                                                                                                                                                                                    |
| P | P35523 | DR | voltage-gated chloride channel activity                                                                                                                                                                                                       |
| P | P35561 | CC | Inward rectifier potassium channels are characterized by a greater tendency to allow potassium to flow into the cell rather than out of it                                                                                                    |
| P | P35561 | CC | Their voltage dependence is regulated by the concentration of extracellular potassium; as external potassium is raised, the voltage range of the channel opening shifts to more positive voltages                                             |
| P | P35561 | DE | Inward rectifier K <sup>+</sup> channel Kir2.1;                                                                                                                                                                                               |
| P | P35561 | DE | Inward rectifier potassium channel 2;                                                                                                                                                                                                         |
| P | P35561 | DE | Potassium channel, inwardly rectifying subfamily J member 2;                                                                                                                                                                                  |
| P | P35561 | DR | inward rectifier potassium channel activity                                                                                                                                                                                                   |
| P | P35670 | CC | Involved in the export of copper out of the cells, such as the efflux of hepatic copper into the bile.                                                                                                                                        |
| P | P35670 | DE | Copper pump 2;                                                                                                                                                                                                                                |
| P | P35670 | DE | Copper-transporting ATPase 2;                                                                                                                                                                                                                 |
| P | P35670 | DR | copper-exporting ATPase activity                                                                                                                                                                                                              |
| P | P35755 | DE | Iron-regulated 40 kDa protein;                                                                                                                                                                                                                |
| P | P35755 | DE | Iron-utilization periplasmic protein;                                                                                                                                                                                                         |
| P | P35755 | DE | Major ferric iron-binding protein;                                                                                                                                                                                                            |
| P | P35839 | DE | Probable formate transporter;                                                                                                                                                                                                                 |
| P | P35865 | CC | Permease that is involved in the transport across the membrane of lysine.                                                                                                                                                                     |
| P | P36021 | DE | Monocarboxylate transporter 7;                                                                                                                                                                                                                |
| P | P36021 | DE | Monocarboxylate transporter 8;                                                                                                                                                                                                                |
| P | P36035 | CC | Essential to lactate transport.                                                                                                                                                                                                               |
| P | P36035 | DR | lactate transmembrane transporter activity                                                                                                                                                                                                    |
| P | P36371 | CC | Also acts as a molecular scaffold for the final stage of MHC class I folding, namely the binding of peptide                                                                                                                                   |
| P | P36371 | DE | Antigen peptide transporter 2;                                                                                                                                                                                                                |
| P | P36371 | DR | peptide transporter activity                                                                                                                                                                                                                  |
| P | P36606 | CC | Sodium export from cell, takes up external protons in exchange for internal sodium ions                                                                                                                                                       |
| P | P36606 | DE | Na <sup>+</sup> /H <sup>+</sup> antiporter;                                                                                                                                                                                                   |
| P | P36606 | DR | sodium:hydrogen antiporter activity                                                                                                                                                                                                           |
| P | P36634 | CC | Involved in a peptide intake transport system that plays a role in the resistance to antimicrobial peptides.                                                                                                                                  |
| P | P36634 | DE | Peptide transport periplasmic protein sapA;                                                                                                                                                                                                   |
| P | P36636 | CC | Involved in a peptide intake transport system that plays a role in the resistance to antimicrobial peptides.                                                                                                                                  |
| P | P36636 | DE | Peptide transport system ATP-binding protein SapD;                                                                                                                                                                                            |
| P | P36636 | DR | peptide transporter activity                                                                                                                                                                                                                  |
| P | P36638 | CC | Involved in a peptide intake transport system that plays a role in the resistance to antimicrobial peptides.                                                                                                                                  |
| P | P36638 | DE | Peptide transport system ATP-binding protein SapF;                                                                                                                                                                                            |
| P | P36640 | CC | Mediates magnesium influx to the cytosol.                                                                                                                                                                                                     |
| P | P36640 | DE | Magnesium-transporting ATPase, P-type 1;                                                                                                                                                                                                      |
| P | P36640 | DE | Mg <sup>2+</sup> transport ATPase, P-type 1;                                                                                                                                                                                                  |
| P | P36640 | DR | magnesium-importing ATPase activity                                                                                                                                                                                                           |
| P | P36672 | CC | This system is involved in trehalose transport.                                                                                                                                                                                               |
| P | P36672 | DE | PTS system trehalose-specific EIIB component;                                                                                                                                                                                                 |

|   |        |    |                                                                                         |
|---|--------|----|-----------------------------------------------------------------------------------------|
| P | P36672 | DE | PTS system trehalose-specific EIIBC component;                                          |
| P | P36672 | DE | PTS system trehalose-specific EIIC component;                                           |
| P | P36672 | DE | Trehalose permease IIC component;                                                       |
| P | P36672 | DE | Trehalose-specific phosphotransferase enzyme IIB component;                             |
| P | P37020 | DR | trehalose transmembrane transporter activity                                            |
| P | P37020 | CC | Potential voltage-gated chloride channel.                                               |
| P | P37020 | DE | Voltage-gated chloride channel;                                                         |
| P | P37020 | DR | voltage-gated chloride channel activity                                                 |
| P | P37080 | CC | This system is involved in sorbose transport.                                           |
| P | P37080 | DE | PTS system sorbose-specific EIIA component;                                             |
| P | P37080 | DE | Sorbose-specific phosphotransferase enzyme IIA component;                               |
| P | P37081 | CC | This system is involved in sorbose transport.                                           |
| P | P37081 | DE | PTS system sorbose-specific EIIB component;                                             |
| P | P37081 | DE | Sorbose-specific phosphotransferase enzyme IIB component;                               |
| P | P37082 | CC | This system is involved in sorbose transport.                                           |
| P | P37082 | DE | PTS system sorbose-specific EIIC component;                                             |
| P | P37082 | DE | Sorbose permease IIC component;                                                         |
| P | P37083 | CC | This system is involved in sorbose transport.                                           |
| P | P37083 | DE | PTS system sorbose-specific EIID component;                                             |
| P | P37083 | DE | Sorbose permease IID component;                                                         |
| P | P37088 | CC | Controls the reabsorption of sodium in kidney, colon, lung and sweat glands             |
| P | P37088 | CC | sodium permeable non-voltage-sensitive ion channel inhibited by the diuretic amiloride. |
| P | P37088 | DE | Amiloride-sensitive sodium channel subunit alpha;                                       |
| P | P37088 | DE | Epithelial Na <sup>+</sup> channel subunit alpha;                                       |
| P | P37088 | DE | Nonvoltage-gated sodium channel 1 subunit alpha;                                        |
| P | P37188 | CC | This system is involved in galactitol transport.                                        |
| P | P37188 | DE | Galactitol-specific phosphotransferase enzyme IIB component;                            |
| P | P37188 | DE | PTS system galactitol-specific EIIB component;                                          |
| P | P37329 | CC | Binds molybdate with high specificity and affinity.                                     |
| P | P37329 | DE | Molybdate-binding periplasmic protein;                                                  |
| P | P37329 | DR | molybdate transmembrane-transporting ATPase activity                                    |
| P | P37387 | CC | Binds with high affinity to xylose.                                                     |
| P | P37388 | CC | Part of the ABC transporter complex XylFGH involved in xylose import                    |
| P | P37388 | CC | The XylFGH system can also transport ribose in absence of xylose.                       |
| P | P37388 | DE | Xylose import ATP-binding protein XylG;                                                 |
| P | P37439 | CC | This system is involved in glucose transport (By similarity).                           |
| P | P37439 | DE | Glucose permease IIC component;                                                         |
| P | P37439 | DE | Glucose-specific phosphotransferase enzyme IIB component;                               |
| P | P37439 | DE | PTS system glucose-specific EIIB component;                                             |
| P | P37439 | DE | PTS system glucose-specific EIIC component;                                             |
| P | P37439 | DE | PTS system glucose-specific EIICB component;                                            |
| P | P37439 | DR | glucose transmembrane transporter activity                                              |
| P | P37460 | CC | Permease that is involved in the transport across the cytoplasmic membrane of proline.  |
| P | P37460 | DE | Proline-specific permease ProY;                                                         |
| P | P37617 | CC | Involved in export of lead, cadmium, zinc and mercury.                                  |
| P | P37617 | CC | Involved in export of lead, cadmium, zinc and mercury.                                  |
| P | P37617 | CC | Involved in export of lead, cadmium, zinc and mercury.                                  |
| P | P37617 | DE | Lead, cadmium, zinc and mercury-transporting ATPase;                                    |
| P | P37617 | DE | Lead, cadmium, zinc and mercury-transporting ATPase;                                    |
| P | P37617 | DE | Lead, cadmium, zinc and mercury-transporting ATPase;                                    |
| P | P37617 | DR | cadmium-exporting ATPase activity                                                       |
| P | P37617 | DR | zinc-exporting ATPase activity                                                          |
| P | P37758 | CC | Involved in excretion of nitrite produced by the dissimilatory reduction of nitrate.    |
| P | P37758 | DE | Nitrite extrusion protein 2;                                                            |
| P | P37758 | DE | Nitrite facilitator 2;                                                                  |
| P | P37758 | DR | nitrite efflux transmembrane transporter activity                                       |
| P | P37902 | CC | Binds to both aspartate and glutamate.                                                  |
| P | P37902 | CC | Part of the binding-protein-dependent transport system for glutamate and aspartate.     |
| P | P37902 | CC | Part of the binding-protein-dependent transport system for glutamate and aspartate.     |
| P | P37902 | DE | Glutamate/aspartate periplasmic-binding protein;                                        |
| P | P37902 | DE | Glutamate/aspartate periplasmic-binding protein;                                        |
| P | P37972 | DE | Nickel and cobalt resistance protein CnrA;                                              |
| P | P38043 | CC | Essential component of the nitrate-transporting system                                  |
| P | P38043 | DE | Nitrate transport protein NrtA;                                                         |

|   |        |    |                                                                                                                                                                                            |
|---|--------|----|--------------------------------------------------------------------------------------------------------------------------------------------------------------------------------------------|
| P | P38044 | CC | Probably part of a high-affinity binding-protein- dependent transport system for nitrate; probably responsible for the translocation of the substrate across the membrane (By similarity). |
| P | P38044 | DE | Nitrate transport permease protein nrtB;                                                                                                                                                   |
| P | P38044 | DR | nitrate transmembrane transporter activity                                                                                                                                                 |
| P | P38045 | CC | Probably part of a high-affinity binding-protein- dependent transport system for nitrate.                                                                                                  |
| P | P38045 | DE | Nitrate transport ATP-binding protein NrtC;                                                                                                                                                |
| P | P38045 | DR | nitrate transmembrane transporter activity                                                                                                                                                 |
| P | P38046 | CC | Probably part of a high-affinity binding-protein- dependent transport system for nitrate.                                                                                                  |
| P | P38046 | DE | Nitrate transport ATP-binding protein NrtD;                                                                                                                                                |
| P | P38046 | DR | nitrate transmembrane transporter activity                                                                                                                                                 |
| P | P38084 | CC | Permease for leucine, valine and isoleucine                                                                                                                                                |
| P | P38084 | CC | Permease for leucine, valine and isoleucine                                                                                                                                                |
| P | P38084 | CC | Permease for leucine, valine and isoleucine                                                                                                                                                |
| P | P38085 | CC | High-affinity transport of valine and tyrosine                                                                                                                                             |
| P | P38085 | CC | High-affinity transport of valine and tyrosine                                                                                                                                             |
| P | P38085 | CC | Low- affinity transport of tryptophan                                                                                                                                                      |
| P | P38085 | DE | Tyrosine and tryptophan amino acid transporter 1;                                                                                                                                          |
| P | P38085 | DE | Tyrosine and tryptophan amino acid transporter 1;                                                                                                                                          |
| P | P38085 | DE | Valine/tyrosine/tryptophan amino-acid permease 1;                                                                                                                                          |
| P | P38085 | DE | Valine/tyrosine/tryptophan amino-acid permease 1;                                                                                                                                          |
| P | P38085 | DE | Valine/tyrosine/tryptophan amino-acid permease 1;                                                                                                                                          |
| P | P38085 | DR | low-affinity tryptophan transmembrane transporter activity                                                                                                                                 |
| P | P38152 | CC | Transport of citrate across inner mitochondrial membrane.                                                                                                                                  |
| P | P38152 | DE | Citrate transport protein;                                                                                                                                                                 |
| P | P38156 | CC | High-affinity uptake of maltose and maltotriose                                                                                                                                            |
| P | P38156 | DE | Maltose permease MAL31;                                                                                                                                                                    |
| P | P38156 | DE | Maltose transport protein MAL31;                                                                                                                                                           |
| P | P38196 | CC | High-affinity transport of uridine.                                                                                                                                                        |
| P | P38196 | DE | Uridine permease;                                                                                                                                                                          |
| P | P38196 | DR | uridine transmembrane transporter activity                                                                                                                                                 |
| P | P38359 | CC | High affinity uptake of sulfate into the cell.                                                                                                                                             |
| P | P38359 | DE | High-affinity sulfate transporter 1;                                                                                                                                                       |
| P | P38359 | DE | Sulfate permease 1;                                                                                                                                                                        |
| P | P38359 | DR | secondary active sulfate transmembrane transporter activity                                                                                                                                |
| P | P38360 | CC | Probably involved in copper transport and in the regulation of cellular copper levels.                                                                                                     |
| P | P38360 | DE | Probable copper-transporting ATPase;                                                                                                                                                       |
| P | P38360 | DR | copper-exporting ATPase activity                                                                                                                                                           |
| P | P38361 | DE | Phosphate permease PHO89;                                                                                                                                                                  |
| P | P38361 | DR | inorganic phosphate transmembrane transporter activity                                                                                                                                     |
| P | P38361 | DR | sodium:inorganic phosphate symporter activity                                                                                                                                              |
| P | P38731 | CC | Involved in the transport of siderophore ferrichrome and so has a role in iron homeostasis.                                                                                                |
| P | P38731 | DE | Ferrichrome permease;                                                                                                                                                                      |
| P | P38734 | CC | Very low affinity permease for methionine.                                                                                                                                                 |
| P | P38734 | DE | Low-affinity methionine permease;                                                                                                                                                          |
| P | P38734 | DR | L-methionine transmembrane transporter activity                                                                                                                                            |
| P | P38778 | CC | High-affinity manganese transporter involved in mobilizing manganese from vesicular stores in conditions of low manganese ion concentrations.                                              |
| P | P38778 | DE | Manganese transporter SMF2;                                                                                                                                                                |
| P | P38865 | CC | Provides bioavailable copper via mobilization of vacuolar copper stores and export to the cytoplasm.                                                                                       |
| P | P38865 | DE | Copper transport protein CTR2;                                                                                                                                                             |
| P | P38865 | DE | Copper transporter 2;                                                                                                                                                                      |
| P | P38865 | DR | copper uptake transmembrane transporter activity                                                                                                                                           |
| P | P38921 | DR | S-adenosylmethionine transmembrane transporter activity                                                                                                                                    |
| P | P38925 | CC | High-affinity manganese transporter involved in manganese uptake from the extracellular environment                                                                                        |
| P | P38925 | DE | Manganese transporter SMF1;                                                                                                                                                                |
| P | P38929 | CC | This magnesium-dependent enzyme catalyzes the hydrolysis of ATP coupled with the transport of calcium                                                                                      |
| P | P38929 | CC | Transports the calcium to the vacuole and participates in the control of the cytosolic free calcium.                                                                                       |
| P | P38929 | DE | Calcium-transporting ATPase 2;                                                                                                                                                             |
| P | P38929 | DE | Vacuolar Ca2+-ATPase;                                                                                                                                                                      |

|   |        |    |                                                                                                                                                                                                                                                      |
|---|--------|----|------------------------------------------------------------------------------------------------------------------------------------------------------------------------------------------------------------------------------------------------------|
| P | P38929 | DR | calcium-transporting ATPase activity                                                                                                                                                                                                                 |
| P | P38967 | CC | Required for high-affinity tryptophan transport                                                                                                                                                                                                      |
| P | P38967 | DE | Tryptophan amino acid transporter;                                                                                                                                                                                                                   |
| P | P38967 | DE | Tryptophan permease;                                                                                                                                                                                                                                 |
| P | P38967 | DR | high-affinity tryptophan transmembrane transporter activity                                                                                                                                                                                          |
| P | P38995 | CC | probably involved in copper transport and in the regulation of cellular copper level                                                                                                                                                                 |
| P | P38995 | CC | Retrieves copper from the metallochaperone ATX1 and incorporates it into trans-Golgi vesicles.                                                                                                                                                       |
| P | P38995 | DE | Copper-transporting ATPase;                                                                                                                                                                                                                          |
| P | P38995 | DR | copper-exporting ATPase activity                                                                                                                                                                                                                     |
| P | P39003 | DE | High-affinity hexose transporter HXT6;                                                                                                                                                                                                               |
| P | P39004 | DE | High-affinity hexose transporter HXT6;                                                                                                                                                                                                               |
| P | P39109 | CC | Cooperates for the ATP-dependent vacuolar transport of bilirubin and glutathione conjugates.                                                                                                                                                         |
| P | P39109 | DR | glutathione S-conjugate-exporting ATPase activity                                                                                                                                                                                                    |
| P | P39141 | DR | nucleoside:sodium symporter activity                                                                                                                                                                                                                 |
| P | P39141 | DR | nucleoside:sodium symporter activity                                                                                                                                                                                                                 |
| P | P39172 | CC | Involved in the high-affinity zinc uptake transport system.                                                                                                                                                                                          |
| P | P39172 | DE | High-affinity zinc uptake system protein znuA;                                                                                                                                                                                                       |
| P | P39344 | CC | Transports L-idonate, D-gluconate and 5-keto-D- gluconate, from the periplasm across the inner membrane.                                                                                                                                             |
| P | P39344 | DE | Gnt-II system L-idonate transporter;                                                                                                                                                                                                                 |
| P | P39344 | DR | L-idonate transmembrane transporter activity                                                                                                                                                                                                         |
| P | P39414 | CC | Catalyzes the uptake of tartrate in exchange for intracellular succinate                                                                                                                                                                             |
| P | P39414 | DE | Tartrate carrier;                                                                                                                                                                                                                                    |
| P | P39414 | DE | Tartrate transporter;                                                                                                                                                                                                                                |
| P | P39660 | CC | Binds bicarbonate with high affinity.                                                                                                                                                                                                                |
| P | P39660 | CC | Part of the ABC transporter complex CmpABCD involved in bicarbonate transport                                                                                                                                                                        |
| P | P39660 | DE | Bicarbonate-binding protein CmpA;                                                                                                                                                                                                                    |
| P | P39775 | CC | Involved in a high affinity multicomponent binding- protein-dependent transport system for choline; probably responsible for the translocation of the substrate across the membrane.                                                                 |
| P | P39775 | DE | Choline transport system permease protein opuBD;                                                                                                                                                                                                     |
| P | P39816 | DR | glucose transmembrane transporter activity                                                                                                                                                                                                           |
| P | P39832 | CC | Involved in the high-affinity zinc uptake transport system.                                                                                                                                                                                          |
| P | P39832 | DE | High-affinity zinc uptake system membrane protein znuB;                                                                                                                                                                                              |
| P | P39843 | CC | Causes the efflux of a variety of toxic substances, including such structurally diverse compounds as ethidium bromide, rhodamine and acridine dyes, tetraphenylphosphonium, puromycin, chloramphenicol, doxorubicin, and fluoroquinolone antibiotics |
| P | P39924 | CC | Probable glucose transporter.                                                                                                                                                                                                                        |
| P | P39924 | DE | Hexose transporter HXT13;                                                                                                                                                                                                                            |
| P | P39924 | DR | glucose transmembrane transporter activity                                                                                                                                                                                                           |
| P | P39932 | DE | Sugar transporter STL1;                                                                                                                                                                                                                              |
| P | P39980 | CC | Involved in the transport of siderophore ferrioxamine B and so has a role in iron homeostasis.                                                                                                                                                       |
| P | P39980 | DE | Ferrioxamine B permease;                                                                                                                                                                                                                             |
| P | P40035 | CC | Transport of phosphate groups from the cytosol to the mitochondrial matrix.                                                                                                                                                                          |
| P | P40035 | DE | Mitochondrial phosphate carrier protein 2;                                                                                                                                                                                                           |
| P | P40035 | DE | Phosphate transport protein 2;                                                                                                                                                                                                                       |
| P | P40035 | DR | inorganic phosphate transmembrane transporter activity                                                                                                                                                                                               |
| P | P40039 | DE | Cytosine/purine transport protein FCY21;                                                                                                                                                                                                             |
| P | P40310 | CC | Outwardly rectifying potassium channel.                                                                                                                                                                                                              |
| P | P40310 | DE | Outward-rectifier potassium channel TOK1;                                                                                                                                                                                                            |
| P | P40310 | DE | Two-domain outward rectifier K+ channel YORK;                                                                                                                                                                                                        |
| P | P40310 | DR | potassium channel activity                                                                                                                                                                                                                           |
| P | P40527 | DE | Probable phospholipid-transporting ATPase NEO1;                                                                                                                                                                                                      |
| P | P40527 | DR | phospholipid-translocating ATPase activity                                                                                                                                                                                                           |
| P | P40790 | CC | Part of the ABC transporter complex FliABCD involved in spermidine/putrescine import                                                                                                                                                                 |
| P | P40790 | CC | Part of the ABC transporter complex FliABCD involved in spermidine/putrescine import                                                                                                                                                                 |
| P | P40790 | DE | Spermidine/putrescine import ATP-binding protein PotA;                                                                                                                                                                                               |
| P | P40790 | DE | Spermidine/putrescine import ATP-binding protein PotA;                                                                                                                                                                                               |
| P | P40812 | DE | L-asparagine permease;                                                                                                                                                                                                                               |
| P | P40812 | DE | L-asparagine transport protein;                                                                                                                                                                                                                      |
| P | P40860 | CC | Part of the ABC transporter complex CysAW 1P involved in sulfate/inosulfate import                                                                                                                                                                   |
| P | P40860 | DE | Sulfate-transporting ATPase;                                                                                                                                                                                                                         |

|   |        |    |                                                                                                                                                                                                                                              |
|---|--------|----|----------------------------------------------------------------------------------------------------------------------------------------------------------------------------------------------------------------------------------------------|
| P | P40860 | DE | Sulfate/thiosulfate import ATP-binding protein CysA;                                                                                                                                                                                         |
| P | P40860 | DR | sulfate transmembrane-transporting ATPase activity                                                                                                                                                                                           |
| P | P40862 | CC | Proton symporter that senses osmotic shifts and responds by importing osmolytes such as proline, glycine betaine, stachydrine, pipecolic acid, ectoine and taurine                                                                           |
| P | P40862 | DE | Proline porter II;                                                                                                                                                                                                                           |
| P | P40862 | DE | Proline/betaine transporter;                                                                                                                                                                                                                 |
| P | P40862 | DE | Proline/betaine transporter;                                                                                                                                                                                                                 |
| P | P40879 | CC | Chloride/bicarbonate exchanger                                                                                                                                                                                                               |
| P | P40879 | DE | Chloride anion exchanger;                                                                                                                                                                                                                    |
| P | P40885 | DE | Hexose transporter HXT9;                                                                                                                                                                                                                     |
| P | P40886 | DE | Hexose transporter HXT8;                                                                                                                                                                                                                     |
| P | P40897 | DE | Oligopeptide transporter 1;                                                                                                                                                                                                                  |
| P | P40897 | DR | proton-dependent oligopeptide secondary active transmembrane transporter                                                                                                                                                                     |
| P | P40941 | CC | Catalyzes the exchange of ADP and ATP across the mitochondrial inner                                                                                                                                                                         |
| P | P40941 | CC | Catalyzes the exchange of ADP and ATP across the mitochondrial inner                                                                                                                                                                         |
| P | P40941 | DE | ADP/ATP carrier protein 2, mitochondrial;                                                                                                                                                                                                    |
| P | P40941 | DE | ADP/ATP translocase 2;                                                                                                                                                                                                                       |
| P | P40941 | DE | ADP/ATP translocase 2;                                                                                                                                                                                                                       |
| P | P40941 | DR | ATP:ADP antiporter activity                                                                                                                                                                                                                  |
| P | P40941 | DR | ATP:ADP antiporter activity                                                                                                                                                                                                                  |
| P | P40948 | CC | Mediates influx of magnesium ions (By similarity).                                                                                                                                                                                           |
| P | P40948 | DE | Magnesium transport protein CorA;                                                                                                                                                                                                            |
| P | P40988 | DE | Low-affinity Fe(II) transport protein;                                                                                                                                                                                                       |
| P | P41031 | CC | Part of the ABC transporter complex CysAWTP (TC 3.A.1.6.1) involved in sulfate/thiosulfate import                                                                                                                                            |
| P | P41031 | DR | secondary active sulfate transmembrane transporter activity                                                                                                                                                                                  |
| P | P41031 | DR | sulfate transmembrane-transporting ATPase activity                                                                                                                                                                                           |
| P | P41032 | CC | Part of the ABC transporter complex CysAWTP (TC 3.A.1.6.1) involved in sulfate/thiosulfate import                                                                                                                                            |
| P | P41032 | DE | Sulfate transport system permease protein CysT;                                                                                                                                                                                              |
| P | P41032 | DR | sulfate transmembrane transporter activity                                                                                                                                                                                                   |
| P | P41181 | CC | Forms a water-specific channel that provides the plasma membranes of renal collecting duct with high permeability to water, thereby permitting water to move in the direction of an osmotic gradient.                                        |
| P | P41181 | DE | ADH water channel;                                                                                                                                                                                                                           |
| P | P41181 | DE | Collecting duct water channel protein;                                                                                                                                                                                                       |
| P | P41181 | DE | Water channel protein for renal collecting duct;                                                                                                                                                                                             |
| P | P41181 | DR | water channel activity                                                                                                                                                                                                                       |
| P | P41438 | CC | Transporter for the intake of folate, reduced folates and methotrexate.                                                                                                                                                                      |
| P | P41438 | CC | Transporter for the intake of folate, reduced folates and methotrexate.                                                                                                                                                                      |
| P | P41438 | DE | Folate transporter 1;                                                                                                                                                                                                                        |
| P | P41438 | DE | Intestinal folate carrier 1;                                                                                                                                                                                                                 |
| P | P41438 | DE | Reduced folate carrier 1;                                                                                                                                                                                                                    |
| P | P41438 | DR | reduced folate carrier activity                                                                                                                                                                                                              |
| P | P41440 | CC | Transporter for the intake of folate                                                                                                                                                                                                         |
| P | P41440 | CC | Uptake of folate in human placental choriocarcinoma cells occurs by a novel mechanism called potocytosis which functionally couples three components, namely the folate receptor, the folate transporter, and a V-type H <sup>+</sup> -pump. |
| P | P41440 | DE | Folate transporter 1;                                                                                                                                                                                                                        |
| P | P41440 | DE | Intestinal folate carrier 1;                                                                                                                                                                                                                 |
| P | P41440 | DE | Placental folate transporter;                                                                                                                                                                                                                |
| P | P41440 | DE | Reduced folate carrier protein;                                                                                                                                                                                                              |
| P | P41440 | DR | folic acid transporter activity                                                                                                                                                                                                              |
| P | P41440 | DR | reduced folate carrier activity                                                                                                                                                                                                              |
| P | P41815 | CC | Involved in transport of isoleucine, leucine, valine, cysteine, methionine, phenylalanine, tyrosine and tryptophan.                                                                                                                          |
| P | P41815 | CC | Involved in transport of isoleucine, leucine, valine, cysteine, methionine, phenylalanine, tyrosine and tryptophan.                                                                                                                          |
| P | P41815 | DE | Valine amino-acid permease;                                                                                                                                                                                                                  |
| P | P41821 | CC | Calcium-permeable, cation-selective stretch-activated channel (SAC)                                                                                                                                                                          |
| P | P41821 | CC | Functions together with CCH1 to ensure that adequate levels of Ca <sup>2+</sup> are supplied to PMR1 to sustain secretion and growth                                                                                                         |
| P | P41821 | CC | Required for calcium influx and for vitality of MATa cells in a late, pheromone-induced event of the mating process requiring calcium induced signaling                                                                                      |
| P | P41821 | CC | Required for growth in low- calcium environments                                                                                                                                                                                             |



|   |        |    |                                                                                                                                                      |
|---|--------|----|------------------------------------------------------------------------------------------------------------------------------------------------------|
| P | P41821 | DR | calcium channel activity                                                                                                                             |
| P | P42086 | CC | Transport of xanthine in the cell.                                                                                                                   |
| P | P42086 | DE | Xanthine permease;                                                                                                                                   |
| P | P42087 | DE | Putative histidine permease;                                                                                                                         |
| P | P42237 | DE | Probable glucarate transporter;                                                                                                                      |
| P | P42308 | CC | Probably cotransports citrate and at least three or four protons                                                                                     |
| P | P42308 | CC | The citrate uptake is inhibited by the presence of magnesium ions.                                                                                   |
| P | P42308 | CC | Transports the free citrate anion                                                                                                                    |
| P | P42308 | DE | Citrate transporter;                                                                                                                                 |
| P | P42308 | DR | citrate transmembrane transporter activity                                                                                                           |
| P | P42432 | DE | Nitrate transporter;                                                                                                                                 |
| P | P42670 | CC | In addition, it could be implicated in secreting N-acetylpuromycin, the last intermediate of the puromycin biosynthesis pathway, to the environment. |
| P | P42670 | CC | May be involved in active puromycin efflux energized by a proton-dependent electrochemical gradient                                                  |
| P | P42670 | DE | Puromycin resistance protein pur8;                                                                                                                   |
| P | P42833 | CC | Probable glucose transporter.                                                                                                                        |
| P | P42833 | DE | Hexose transporter HXT14;                                                                                                                            |
| P | P42953 | DE | Teichoic acid translocation permease protein tagG;                                                                                                   |
| P | P42954 | DE | Teichoic acid-transporting ATPase;                                                                                                                   |
| P | P43003 | CC | Acts as a symport by cotransporting sodium.                                                                                                          |
| P | P43003 | CC | Essential for terminating the postsynaptic action of glutamate by rapidly removing released glutamate from the synaptic cleft                        |
| P | P43003 | CC | Transports L-glutamate and also L- and D-aspartate                                                                                                   |
| P | P43003 | DE | Sodium-dependent glutamate/aspartate transporter 1;                                                                                                  |
| P | P43003 | DE | Sodium-dependent glutamate/aspartate transporter 1;                                                                                                  |
| P | P43003 | DR | high-affinity glutamate transmembrane transporter activity                                                                                           |
| P | P43003 | DR | sodium:dicarboxylate symporter activity                                                                                                              |
| P | P43004 | CC | Acts as a symport by cotransporting sodium.                                                                                                          |
| P | P43004 | CC | Essential for terminating the postsynaptic action of glutamate by rapidly removing released glutamate from the synaptic cleft                        |
| P | P43004 | CC | Transports L-glutamate and also L- and D-aspartate                                                                                                   |
| P | P43004 | DE | Glutamate/aspartate transporter II;                                                                                                                  |
| P | P43004 | DE | Glutamate/aspartate transporter II;                                                                                                                  |
| P | P43004 | DE | Sodium-dependent glutamate/aspartate transporter 2;                                                                                                  |
| P | P43004 | DE | Sodium-dependent glutamate/aspartate transporter 2;                                                                                                  |
| P | P43004 | DE | Sodium-dependent glutamate/aspartate transporter 2;                                                                                                  |
| P | P43004 | DR | high-affinity glutamate transmembrane transporter activity                                                                                           |
| P | P43004 | DR | sodium:dicarboxylate symporter activity                                                                                                              |
| P | P43005 | CC | Acts as a symport by cotransporting sodium                                                                                                           |
| P | P43005 | DE | Sodium-dependent glutamate/aspartate transporter 3;                                                                                                  |
| P | P43005 | DR | sodium:dicarboxylate symporter activity                                                                                                              |
| P | P43006 | CC | Acts as a symport by cotransporting sodium.                                                                                                          |
| P | P43006 | CC | Essential for terminating the postsynaptic action of glutamate by rapidly removing released glutamate from the synaptic cleft                        |
| P | P43006 | CC | Transports L-glutamate and also L- and D-aspartate                                                                                                   |
| P | P43006 | DE | Sodium-dependent glutamate/aspartate transporter 2;                                                                                                  |
| P | P43006 | DE | Sodium-dependent glutamate/aspartate transporter 2;                                                                                                  |
| P | P43006 | DE | Sodium-dependent glutamate/aspartate transporter 2;                                                                                                  |
| P | P43006 | DR | glutamate:sodium symporter activity                                                                                                                  |
| P | P43006 | DR | glutamate:sodium symporter activity                                                                                                                  |
| P | P43006 | DR | sodium:dicarboxylate symporter activity                                                                                                              |
| P | P43007 | CC | Exhibits sodium dependence.                                                                                                                          |
| P | P43007 | DR | sodium:dicarboxylate symporter activity                                                                                                              |
| P | P43109 | CC | May form an ATP-driven Vi polysaccharide export apparatus, in association with the vexA, vexC and vexD proteins.                                     |
| P | P43109 | DE | Vi polysaccharide export inner-membrane protein vexB;                                                                                                |
| P | P43110 | CC | May form an ATP-driven Vi polysaccharide export apparatus, in association with the VexA, VexB and VexD proteins.                                     |
| P | P43110 | DE | Vi polysaccharide export ATP-binding protein VexC;                                                                                                   |
| P | P43286 | CC | Probably involved in root water uptake                                                                                                               |
| P | P43286 | CC | Water channel required to facilitate the transport of water across cell membrane                                                                     |
| P | P43286 | DR | water channel activity                                                                                                                               |
| P | P43287 | CC | Plays an predominant role in root water uptake process in conditions of reduced transpiration, and in osmotic fluid transport                        |

|   |        |    |                                                                                                                                      |
|---|--------|----|--------------------------------------------------------------------------------------------------------------------------------------|
| P | P43287 | CC | Water channel required to facilitate the transport of water across cell membrane                                                     |
| P | P43287 | DR | water channel activity                                                                                                               |
| P | P43436 | DE | Na <sup>+</sup> -translocating ATPase subunit E;                                                                                     |
| P | P43436 | DE | V-type sodium ATPase subunit E;                                                                                                      |
| P | P43436 | DE | V-type sodium pump subunit E;                                                                                                        |
| P | P43437 | DE | Na <sup>+</sup> -translocating ATPase subunit F;                                                                                     |
| P | P43437 | DE | V-type sodium ATPase subunit F;                                                                                                      |
| P | P43437 | DE | V-type sodium pump subunit F;                                                                                                        |
| P | P43439 | DE | Na <sup>+</sup> -translocating ATPase subunit I;                                                                                     |
| P | P43439 | DE | V-type sodium ATPase subunit I;                                                                                                      |
| P | P43439 | DE | V-type sodium pump subunit I;                                                                                                        |
| P | P43455 | DE | Na <sup>+</sup> -translocating ATPase subunit G;                                                                                     |
| P | P43455 | DE | V-type sodium ATPase subunit G;                                                                                                      |
| P | P43455 | DE | V-type sodium pump subunit G;                                                                                                        |
| P | P43456 | DE | Na <sup>+</sup> -translocating ATPase subunit C;                                                                                     |
| P | P43456 | DE | V-type sodium ATPase subunit C;                                                                                                      |
| P | P43456 | DE | V-type sodium pump subunit C;                                                                                                        |
| P | P43457 | DE | Na <sup>+</sup> -translocating ATPase subunit K;                                                                                     |
| P | P43457 | DE | Sodium ATPase proteolipid component;                                                                                                 |
| P | P43457 | DE | V-type sodium ATPase subunit K;                                                                                                      |
| P | P43466 | DE | Raffinose carrier protein;                                                                                                           |
| P | P43466 | DE | Raffinose permease;                                                                                                                  |
| P | P43581 | DE | Hexose transporter HXT10;                                                                                                            |
| P | P43756 | CC | Involved in the bidirectional transport of formate (By similarity).                                                                  |
| P | P43756 | DE | Formate channel;                                                                                                                     |
| P | P43756 | DE | Probable formate transporter;                                                                                                        |
| P | P44051 | DR | short-chain fatty acid transporter activity                                                                                          |
| P | P44526 | CC | Involved in the high-affinity zinc uptake transport system (By similarity).                                                          |
| P | P44526 | DE | High-affinity zinc uptake system protein znuA;                                                                                       |
| P | P44535 | CC | The physiological role may be the reduction of the intracellular concentration of toxic sugars or sugar metabolites (By similarity). |
| P | P44535 | DE | Probable sugar efflux transporter;                                                                                                   |
| P | P44581 | CC | Na <sup>+</sup> /H <sup>+</sup> antiporter that extrudes sodium in exchange for external protons (By similarity)                     |
| P | P44581 | DE | Na <sup>+</sup> /H <sup>+</sup> antiporter nhaA;                                                                                     |
| P | P44581 | DE | Sodium/proton antiporter nhaA;                                                                                                       |
| P | P44614 | CC | involved in transporting tryptophan across the cytoplasmic membrane (By similarity)                                                  |
| P | P44614 | DE | Tryptophan permease;                                                                                                                 |
| P | P44614 | DE | Tryptophan-specific transport protein;                                                                                               |
| P | P44615 | CC | Involved in the import of serine into the cell (By similarity).                                                                      |
| P | P44615 | DE | Serine transporter;                                                                                                                  |
| P | P44629 | DE | Probable 3-phenylpropionic acid transporter;                                                                                         |
| P | P44691 | CC | Involved in the high-affinity zinc uptake transport system (By similarity).                                                          |
| P | P44691 | DE | High-affinity zinc uptake system membrane protein znuB;                                                                              |
| P | P44692 | CC | Part of the ABC transporter complex ZnuABC involved in zinc import                                                                   |
| P | P44692 | DE | Zinc import ATP-binding protein ZnuC;                                                                                                |
| P | P44692 | DR | zinc transporting ATPase activity                                                                                                    |
| P | P44706 | CC | Na <sup>+</sup> /H <sup>+</sup> antiporter that extrudes sodium in exchange for external protons (By similarity)                     |
| P | P44706 | DE | Na <sup>+</sup> /H <sup>+</sup> antiporter nhaB;                                                                                     |
| P | P44706 | DE | Sodium/proton antiporter nhaB;                                                                                                       |
| P | P44706 | DR | sodium:hydrogen antiporter activity                                                                                                  |
| P | P44714 | CC | This system is involved in fructose transport.                                                                                       |
| P | P44714 | DE | Fructose permease IIC component;                                                                                                     |
| P | P44714 | DE | Fructose-specific phosphotransferase enzyme IIB component;                                                                           |
| P | P44714 | DE | PTS system fructose-specific EIIB component;                                                                                         |
| P | P44714 | DE | PTS system fructose-specific EIIBC component;                                                                                        |
| P | P44714 | DE | PTS system fructose-specific EIIC component;                                                                                         |
| P | P44715 | CC | This system is involved in fructose transport (By similarity).                                                                       |
| P | P44715 | DE | Fructose PTS diphosphoryl transfer protein;                                                                                          |
| P | P44715 | DE | Fructose-specific phosphotransferase enzyme IIA component;                                                                           |
| P | P44715 | DE | PTS system fructose-specific EIIA component;                                                                                         |
| P | P44727 | CC | involved in transporting tyrosine across the cytoplasmic membrane (By similarity)                                                    |
| P | P44727 | DE | Tyrosine permease 1;                                                                                                                 |
| P | P44727 | DE | Tyrosine-specific transport protein 1;                                                                                               |
| P | P44731 | CC | Required for the activity of the bacterial periplasmic transport system of putrescine and spermidine                                 |

|   |        |    |                                                                                                                                                                                         |
|---|--------|----|-----------------------------------------------------------------------------------------------------------------------------------------------------------------------------------------|
| P | P44731 | CC | Required for the activity of the bacterial periplasmic transport system of putrescine and spermidine                                                                                    |
| P | P44731 | DE | Spermidine/putrescine-binding periplasmic protein 2;                                                                                                                                    |
| P | P44731 | DE | Spermidine/putrescine-binding periplasmic protein 2;                                                                                                                                    |
| P | P44735 | CC | Part of the ABC transporter complex RbsABCD involved in ribose import                                                                                                                   |
| P | P44735 | DE | Ribose import ATP-binding protein RbsA;                                                                                                                                                 |
| P | P44736 | CC | Part of the binding-protein-dependent transport system for ribose                                                                                                                       |
| P | P44736 | DE | Ribose transport system permease protein rbsC;                                                                                                                                          |
| P | P44737 | CC | Involved in the high-affinity D-ribose membrane transport system and also serves as the primary chemoreceptor for chemotaxis (By similarity).                                           |
| P | P44737 | DE | D-ribose-binding periplasmic protein;                                                                                                                                                   |
| P | P44747 | CC | involved in transporting tyrosine across the cytoplasmic membrane (By similarity)                                                                                                       |
| P | P44747 | DE | Tyrosine permease 2;                                                                                                                                                                    |
| P | P44747 | DE | Tyrosine-specific transport protein 2;                                                                                                                                                  |
| P | P44768 | CC | Probable putrescine-ornithine antiporter (By similarity).                                                                                                                               |
| P | P44768 | DE | Putrescine transport protein;                                                                                                                                                           |
| P | P44768 | DE | Putrescine-ornithine antiporter;                                                                                                                                                        |
| P | P44776 | CC | Transport of L-fucose into the cell.                                                                                                                                                    |
| P | P44776 | DE | L-fucose permease;                                                                                                                                                                      |
| P | P44785 | CC | Part of the ABC transporter complex MetNIQ involved in methionine import                                                                                                                |
| P | P44785 | DE | Methionine import ATP-binding protein MetN;                                                                                                                                             |
| P | P44785 | DR | D-methionine transmembrane transporter activity                                                                                                                                         |
| P | P44826 | CC | Glycerol enters the cell via the glycerol diffusion facilitator protein                                                                                                                 |
| P | P44826 | CC | This membrane protein facilitates the movement of glycerol across the cytoplasmic membrane (By similarity).                                                                             |
| P | P44826 | DE | Glycerol uptake facilitator protein;                                                                                                                                                    |
| P | P44843 | CC | Interacts with trk system potassium uptake protein trkA and requires trkE for transport activity (By similarity).                                                                       |
| P | P44843 | CC | Low-affinity potassium transport system                                                                                                                                                 |
| P | P44843 | DE | Trk system potassium uptake protein trkH;                                                                                                                                               |
| P | P44883 | CC | This protein is involved in the active transport of galactose and glucose (By similarity)                                                                                               |
| P | P44884 | CC | Part of the ABC transporter complex MglABC involved in galactose/methyl galactoside import                                                                                              |
| P | P44884 | DE | Galactose/methyl galactoside import ATP-binding protein MglA;                                                                                                                           |
| P | P44933 | CC | Transport system that facilitate potassium-efflux, possibly by potassium-proton antiport (By similarity).                                                                               |
| P | P44933 | DE | Glutathione-regulated potassium-efflux system protein;                                                                                                                                  |
| P | P44933 | DE | K <sup>+</sup> /H <sup>+</sup> antiporter;                                                                                                                                              |
| P | P44963 | CC | Catalyzes the sodium-dependent uptake of extracellular pantothenate (By similarity)                                                                                                     |
| P | P44963 | CC | Catalyzes the sodium-dependent uptake of extracellular pantothenate (By similarity)                                                                                                     |
| P | P44963 | DE | Pantothenate permease;                                                                                                                                                                  |
| P | P44963 | DE | Sodium/pantothenate symporter;                                                                                                                                                          |
| P | P44963 | DE | Sodium/pantothenate symporter;                                                                                                                                                          |
| P | P44963 | DR | pantothenate transmembrane transporter activity                                                                                                                                         |
| P | P44963 | DR | sodium ion transmembrane transporter activity                                                                                                                                           |
| P | P44984 | CC | Part of the ABC transporter complex thiBPQ involved in thiamine import (By similarity)                                                                                                  |
| P | P44984 | DE | Thiamine-binding periplasmic protein;                                                                                                                                                   |
| P | P44985 | CC | Part of the ABC transporter complex thiBPQ involved in thiamine import                                                                                                                  |
| P | P44985 | DE | Thiamine transport system permease protein thiP;                                                                                                                                        |
| P | P44986 | CC | Part of the ABC transporter complex ThiBPQ involved in thiamine import                                                                                                                  |
| P | P44986 | DE | Thiamine import ATP-binding protein ThiQ;                                                                                                                                               |
| P | P44998 | CC | Mediates influx of magnesium ions (By similarity).                                                                                                                                      |
| P | P44998 | DE | Magnesium transport protein CorA;                                                                                                                                                       |
| P | P44998 | DR | cobalt ion transmembrane transporter activity                                                                                                                                           |
| P | P44998 | DR | magnesium ion transmembrane transporter activity                                                                                                                                        |
| P | P45032 | CC | Part of the ABC transporter complex CcmAB involved in the biogenesis of c-type cytochromes; once thought to export heme, this seems not to be the case, but its exact role is uncertain |
| P | P45032 | DE | Heme exporter protein A;                                                                                                                                                                |
| P | P45032 | DR | heme-transporting ATPase activity                                                                                                                                                       |
| P | P45033 | CC | Required for the export of heme to the periplasm for the biogenesis of c-type cytochromes (By similarity).                                                                              |
| P | P45033 | DE | Heme exporter protein B;                                                                                                                                                                |
| P | P45033 | DR | heme transporter activity                                                                                                                                                               |

|   |        |    |                                                                                                                                                                       |
|---|--------|----|-----------------------------------------------------------------------------------------------------------------------------------------------------------------------|
| P | P45034 | CC | Required for the export of heme to the periplasm for the biogenesis of c-type cytochromes (By similarity).                                                            |
| P | P45034 | DE | Heme exporter protein C;                                                                                                                                              |
| P | P45034 | DR | heme transporter activity                                                                                                                                             |
| P | P45045 | CC | Part of the binding-protein-dependent transport system for D-xylose                                                                                                   |
| P | P45045 | DE | Xylose transport system permease protein xylH;                                                                                                                        |
| P | P45046 | CC | Part of the ABC transporter complex XylFGH involved in xylose import                                                                                                  |
| P | P45046 | DE | Xylose import ATP-binding protein XylG;                                                                                                                               |
| P | P45046 | DR | D-xylose-importing ATPase activity                                                                                                                                    |
| P | P45047 | CC | Involved in the high-affinity D-xylose membrane transport system                                                                                                      |
| P | P45047 | DE | D-xylose-binding periplasmic protein;                                                                                                                                 |
| P | P45051 | DE | Oligopeptide transport ATP-binding protein OppF;                                                                                                                      |
| P | P45052 | DE | Oligopeptide transport ATP-binding protein OppD;                                                                                                                      |
| P | P45053 | DE | Oligopeptide transport system permease protein oppC;                                                                                                                  |
| P | P45054 | DE | Oligopeptide transport system permease protein oppB;                                                                                                                  |
| P | P45089 | CC | Part of the ABC transporter complex ArtPIQM involved in arginine transport                                                                                            |
| P | P45089 | DE | Arginine ABC transporter permease protein ArtM;                                                                                                                       |
| P | P45090 | CC | Part of the ABC transporter complex ArtPIQM involved in arginine transport                                                                                            |
| P | P45090 | DE | Arginine ABC transporter permease protein ArtQ;                                                                                                                       |
| P | P45091 | CC | Part of the ABC transporter complex ArtPIQM involved in arginine transport (By similarity).                                                                           |
| P | P45091 | DE | ABC transporter arginine-binding protein;                                                                                                                             |
| P | P45092 | CC | Part of the ABC transporter complex ArtPIQM involved in arginine transport                                                                                            |
| P | P45092 | DE | Arginine transport ATP-binding protein ArtP;                                                                                                                          |
| P | P45094 | DE | Dipeptide transport ATP-binding protein DppF;                                                                                                                         |
| P | P45095 | DE | Dipeptide transport ATP-binding protein DppD;                                                                                                                         |
| P | P45096 | DE | Dipeptide transport system permease protein dppB;                                                                                                                     |
| P | P45117 | CC | Transport of uracil in the cell (By similarity).                                                                                                                      |
| P | P45117 | DE | Probable uracil permease;                                                                                                                                             |
| P | P45117 | DE | Uracil transporter;                                                                                                                                                   |
| P | P45168 | CC | Required for the activity of the bacterial periplasmic transport system of putrescine and spermidine                                                                  |
| P | P45168 | CC | Required for the activity of the bacterial periplasmic transport system of putrescine and spermidine                                                                  |
| P | P45168 | DE | Spermidine/putrescine-binding periplasmic protein 1;                                                                                                                  |
| P | P45168 | DE | Spermidine/putrescine-binding periplasmic protein 1;                                                                                                                  |
| P | P45169 | CC | Required for the activity of the bacterial periplasmic transport system of putrescine and spermidine (By similarity).                                                 |
| P | P45169 | CC | Required for the activity of the bacterial periplasmic transport system of putrescine and spermidine (By similarity).                                                 |
| P | P45169 | DE | Spermidine/putrescine transport system permease protein PotC;                                                                                                         |
| P | P45169 | DE | Spermidine/putrescine transport system permease protein PotC;                                                                                                         |
| P | P45170 | CC | Required for the activity of the bacterial periplasmic transport system of putrescine and spermidine (By similarity).                                                 |
| P | P45170 | CC | Required for the activity of the bacterial periplasmic transport system of putrescine and spermidine (By similarity).                                                 |
| P | P45170 | DE | Spermidine/putrescine transport system permease protein PotB;                                                                                                         |
| P | P45170 | DE | Spermidine/putrescine transport system permease protein PotB;                                                                                                         |
| P | P45171 | CC | Part of the ABC transporter complex PotABCD involved in                                                                                                               |
| P | P45171 | CC | part of the ABC transporter complex PotABCD involved in                                                                                                               |
| P | P45171 | DE | spermidine/putrescine import                                                                                                                                          |
| P | P45171 | DE | Spermidine/putrescine import ATP-binding protein PotA;                                                                                                                |
| P | P45171 | DE | Spermidine/putrescine import ATP-binding protein PotA;                                                                                                                |
| P | P45174 | CC | Catalyzes the sodium-dependent uptake of extracellular L-proline (By similarity).                                                                                     |
| P | P45174 | DE | Proline permease;                                                                                                                                                     |
| P | P45174 | DE | Sodium/proline symporter;                                                                                                                                             |
| P | P45174 | DE | Sodium/proline symporter;                                                                                                                                             |
| P | P45174 | DR | proline:sodium symporter activity                                                                                                                                     |
| P | P45174 | DR | proline:sodium symporter activity                                                                                                                                     |
| P | P45190 | CC | Part of the binding-protein-dependent transport system for phosphate; probably responsible for the translocation of the substrate across the membrane (By similarity) |
| P | P45190 | DE | Phosphate transport system permease protein pstA;                                                                                                                     |
| P | P45190 | DR | inorganic phosphate transmembrane transporter activity                                                                                                                |
| P | P45191 | CC | Part of the binding-protein-dependent transport system for phosphate; probably responsible for the translocation of the substrate across the membrane (By similarity) |
| P | P45191 | DE | Phosphate transport system permease protein pstC;                                                                                                                     |

|   |        |    |                                                                                                                                                                        |
|---|--------|----|------------------------------------------------------------------------------------------------------------------------------------------------------------------------|
| P | P45191 | DR | inorganic phosphate transmembrane transporter activity                                                                                                                 |
| P | P45192 | CC | Part of the ABC transporter complex pstSACB involved in phosphate import (By similarity).                                                                              |
| P | P45192 | DE | Phosphate-binding protein pstS;                                                                                                                                        |
| P | P45192 | DR | inorganic phosphate transmembrane transporter activity                                                                                                                 |
| P | P45240 | CC | Catalyzes the sodium-dependent uptake of extracellular glutamate (By similarity).                                                                                      |
| P | P45240 | CC | Catalyzes the sodium-dependent uptake of extracellular glutamate (By similarity).                                                                                      |
| P | P45240 | DE | Glutamate permease;                                                                                                                                                    |
| P | P45240 | DE | Sodium/glutamate symport carrier protein;                                                                                                                              |
| P | P45240 | DE | Sodium/glutamate symport carrier protein;                                                                                                                              |
| P | P45240 | DR | glutamate:sodium symporter activity                                                                                                                                    |
| P | P45240 | DR | glutamate:sodium symporter activity                                                                                                                                    |
| P | P45246 | CC | Involved in the import of serine and threonine into the cell, with the concomitant import of sodium (symport system) (By similarity).                                  |
| P | P45246 | DE | Na <sup>+</sup> /serine-threonine symporter;                                                                                                                           |
| P | P45246 | DR | sodium:dicarboxylate symporter activity                                                                                                                                |
| P | P45246 | DR | sodium:dicarboxylate symporter activity                                                                                                                                |
| P | P45247 | DE | Lipoprotein-releasing system ATP-binding protein LolD;                                                                                                                 |
| P | P45247 | DR | lipoprotein transporter activity                                                                                                                                       |
| P | P45285 | CC | Involved in a peptide intake transport system that plays a role in the resistance to antimicrobial peptides (By similarity).                                           |
| P | P45285 | DE | Peptide transport periplasmic protein sapA;                                                                                                                            |
| P | P45286 | CC | Involved in a peptide intake transport system that plays a role in the resistance to antimicrobial peptides (By similarity).                                           |
| P | P45286 | DE | Peptide transport system permease protein sapB;                                                                                                                        |
| P | P45287 | CC | Involved in a peptide intake transport system that plays a role in the resistance to antimicrobial peptides (By similarity).                                           |
| P | P45287 | DE | Peptide transport system permease protein sapC;                                                                                                                        |
| P | P45288 | CC | Involved in a peptide intake transport system that plays a role in the resistance to antimicrobial peptides (By similarity).                                           |
| P | P45288 | DE | Peptide transport system ATP-binding protein SapD;                                                                                                                     |
| P | P45288 | DR | peptide transporter activity                                                                                                                                           |
| P | P45289 | CC | Involved in a peptide intake transport system that plays a role in the resistance to antimicrobial peptides (By similarity).                                           |
| P | P45289 | DE | Peptide transport system ATP-binding protein SapF;                                                                                                                     |
| P | P45321 | CC | Part of the ABC transporter complex ModABC involved in molybdenum import                                                                                               |
| P | P45321 | DE | Molybdenum import ATP-binding protein ModC;                                                                                                                            |
| P | P45321 | DR | molybdenum ion transmembrane transporter activity                                                                                                                      |
| P | P45322 | CC | part of the binding-protein-dependent transport system for molybdenum; probably responsible for the translocation of the substrate across the membrane (By similarity) |
| P | P45322 | DE | Molybdenum transport system permease protein modB;                                                                                                                     |
| P | P45323 | CC | Involved in the transport of molybdenum into the cell (By similarity).                                                                                                 |
| P | P45338 | CC | This system is involved in glucose transport (By similarity).                                                                                                          |
| P | P45338 | DE | Glucose-specific phosphotransferase enzyme IIA component;                                                                                                              |
| P | P45338 | DE | PTS system glucose-specific EIIA component;                                                                                                                            |
| P | P45356 | DE | Heme/hemopexin transporter protein huxB;                                                                                                                               |
| P | P45562 | DE | Xanthosine permease;                                                                                                                                                   |
| P | P45562 | DE | Xanthosine transporter;                                                                                                                                                |
| P | P45618 | CC | This system is involved in glucose transport.                                                                                                                          |
| P | P45618 | DE | Glucose-specific phosphotransferase enzyme IIA component;                                                                                                              |
| P | P45618 | DE | PTS system glucose-specific EIIA component;                                                                                                                            |
| P | P46032 | CC | Can also transport histidine.                                                                                                                                          |
| P | P46032 | DE | Histidine-transporting protein;                                                                                                                                        |
| P | P46059 | DE | Oligopeptide transporter, small intestine isoform;                                                                                                                     |
| P | P46104 | CC | May mediate the efflux of lincomycin.                                                                                                                                  |
| P | P46104 | DE | Lincomycin resistance protein;                                                                                                                                         |
| P | P46339 | DR | inorganic phosphate transmembrane transporter activity                                                                                                                 |
| P | P46340 | DR | inorganic phosphate transmembrane transporter activity                                                                                                                 |
| P | P46341 | CC | Part of the ABC transporter complex PstSACB involved in phosphate import                                                                                               |
| P | P46341 | DE | ABC phosphate transporter 2;                                                                                                                                           |
| P | P46341 | DE | Phosphate import ATP-binding protein PstB 2;                                                                                                                           |
| P | P46341 | DE | Phosphate-transporting ATPase 2;                                                                                                                                       |
| P | P46341 | DR | inorganic phosphate transmembrane transporter activity                                                                                                                 |
| P | P46341 | DR | phosphate transmembrane-transporting ATPase activity                                                                                                                   |
| P | P46342 | CC | Part of the ABC transporter complex PstSACB involved in phosphate import                                                                                               |

|   |        |    |                                                                                                                                                                                                                                   |
|---|--------|----|-----------------------------------------------------------------------------------------------------------------------------------------------------------------------------------------------------------------------------------|
| P | P46342 | DE | ABC phosphate transporter 1;                                                                                                                                                                                                      |
| P | P46342 | DE | Phosphate import ATP-binding protein PstB 1;                                                                                                                                                                                      |
| P | P46342 | DE | Phosphate-transporting ATPase 1;                                                                                                                                                                                                  |
| P | P46342 | DR | inorganic phosphate transmembrane transporter activity                                                                                                                                                                            |
| P | P46342 | DR | phosphate transmembrane-transporting ATPase activity                                                                                                                                                                              |
| P | P46838 | DR | arsenite transmembrane transporter activity                                                                                                                                                                                       |
| P | P46903 | CC | Involved in ATP-dependent electrogenic sodium extrusion.                                                                                                                                                                          |
| P | P46903 | DE | Na <sup>+</sup> ABC transporter;                                                                                                                                                                                                  |
| P | P46904 | CC | Involved in ATP-dependent electrogenic sodium extrusion.                                                                                                                                                                          |
| P | P46920 | CC | Involved in a multicomponent binding-protein-dependent transport system for glycine betaine                                                                                                                                       |
| P | P46920 | DE | Glycine betaine transport ATP-binding protein OpuAA; involved in a multicomponent binding-protein-dependent transport system for glycine betaine; probably responsible for the translocation of the substrate across the membrane |
| P | P46921 | CC | glycine betaine; probably responsible for the translocation of the substrate across the membrane                                                                                                                                  |
| P | P46921 | DE | Glycine betaine transport system permease protein opuAB;                                                                                                                                                                          |
| P | P46922 | CC | Involved in a multicomponent binding-protein-dependent transport system for glycine betaine.                                                                                                                                      |
| P | P46922 | DE | Glycine betaine-binding protein;                                                                                                                                                                                                  |
| P | P47185 | DE | Hexose transporter HXT16;                                                                                                                                                                                                         |
| P | P47279 | CC | Glycerol enters the cell via the glycerol diffusion facilitator protein                                                                                                                                                           |
| P | P47279 | CC | This membrane protein facilitates the movement of glycerol across the cytoplasmic membrane (By similarity).                                                                                                                       |
| P | P47279 | DE | Probable glycerol uptake facilitator protein;                                                                                                                                                                                     |
| P | P47288 | CC | Part of the ABC transporter complex POTABCD involved in spermidine/putrescine import                                                                                                                                              |
| P | P47288 | CC | Part of the ABC transporter complex POTABCD involved in spermidine/putrescine import                                                                                                                                              |
| P | P47288 | DE | Spermidine/putrescine import ATP-binding protein PotA;                                                                                                                                                                            |
| P | P47288 | DE | Spermidine/putrescine import ATP-binding protein PotA;                                                                                                                                                                            |
| P | P47289 | CC | Required for the activity of the bacterial transport system of putrescine and spermidine (By similarity).                                                                                                                         |
| P | P47289 | CC | Required for the activity of the bacterial transport system of putrescine and spermidine (By similarity).                                                                                                                         |
| P | P47289 | DE | Spermidine/putrescine transport system permease protein PotB homolog;                                                                                                                                                             |
| P | P47289 | DE | Spermidine/putrescine transport system permease protein PotB homolog;                                                                                                                                                             |
| P | P47290 | CC | Required for the activity of the bacterial transport system of putrescine and spermidine (By similarity).                                                                                                                         |
| P | P47290 | CC | Required for the activity of the bacterial transport system of putrescine and spermidine (By similarity).                                                                                                                         |
| P | P47290 | DE | Spermidine/putrescine transport system permease protein PotC homolog;                                                                                                                                                             |
| P | P47290 | DE | Spermidine/putrescine transport system permease protein PotC homolog;                                                                                                                                                             |
| P | P47308 | CC | This system is involved in fructose transport.                                                                                                                                                                                    |
| P | P47308 | DE | Fructose permease IIC component;                                                                                                                                                                                                  |
| P | P47308 | DE | Fructose-specific phosphotransferase enzyme IIA component;                                                                                                                                                                        |
| P | P47308 | DE | Fructose-specific phosphotransferase enzyme IIB component;                                                                                                                                                                        |
| P | P47308 | DE | PTS system fructose-specific EIIA component;                                                                                                                                                                                      |
| P | P47308 | DE | PTS system fructose-specific EIIBC component;                                                                                                                                                                                     |
| P | P47308 | DE | PTS system fructose-specific EIIB component;                                                                                                                                                                                      |
| P | P47308 | DE | PTS system fructose-specific EIIC component;                                                                                                                                                                                      |
| P | P47315 | CC | This system is involved in glucose transport.                                                                                                                                                                                     |
| P | P47315 | DE | Glucose permease IIC component;                                                                                                                                                                                                   |
| P | P47315 | DE | Glucose-specific phosphotransferase enzyme IIA component;                                                                                                                                                                         |
| P | P47315 | DE | Glucose-specific phosphotransferase enzyme IIB component;                                                                                                                                                                         |
| P | P47315 | DE | PTS system glucose-specific EIIA component;                                                                                                                                                                                       |
| P | P47315 | DE | PTS system glucose-specific EIIB component;                                                                                                                                                                                       |
| P | P47315 | DE | PTS system glucose-specific EIIC component;                                                                                                                                                                                       |
| P | P47315 | DE | PTS system glucose-specific EIICBA component;                                                                                                                                                                                     |
| P | P47323 | DE | Oligopeptide transport system permease protein oppB;                                                                                                                                                                              |
| P | P47324 | DE | Oligopeptide transport system permease protein oppC;                                                                                                                                                                              |
| P | P47325 | DE | Oligopeptide transport ATP-binding protein OppD;                                                                                                                                                                                  |
| P | P47326 | DE | Oligopeptide transport ATP-binding protein OppF;                                                                                                                                                                                  |
| P | P47650 | CC | Part of the ABC transporter complex PstSACB involved in phosphate import                                                                                                                                                          |
| P | P47650 | DE | ABC phosphate transporter;                                                                                                                                                                                                        |
| P | P47650 | DE | Phosphate import ATP-binding protein PstB;                                                                                                                                                                                        |
| P | P47650 | DE | Phosphate-transporting ATPase;                                                                                                                                                                                                    |
| P | P47650 | DR | inorganic phosphate transmembrane transporter activity                                                                                                                                                                            |
| P | P47650 | DR | phosphate transmembrane-transporting ATPase activity                                                                                                                                                                              |

|   |        |    |                                                                                                                                                                                                   |
|---|--------|----|---------------------------------------------------------------------------------------------------------------------------------------------------------------------------------------------------|
| P | P47651 | CC | Could be part of a binding-protein-dependent transport system for phosphate; probably responsible for the translocation of the substrate across the membrane (By similarity)                      |
| P | P47651 | DE | Phosphate transport system permease protein pstA homolog;                                                                                                                                         |
| P | P47651 | DR | inorganic phosphate transmembrane transporter activity                                                                                                                                            |
| P | P47869 | CC | GABA, the major inhibitory neurotransmitter in the vertebrate brain, mediates neuronal inhibition by binding to the GABA/benzodiazepine receptor and opening an integral chloride channel.        |
| P | P47869 | DR | chloride channel activity                                                                                                                                                                         |
| P | P47870 | CC | GABA, the major inhibitory neurotransmitter in the vertebrate brain, mediates neuronal inhibition by binding to the GABA/benzodiazepine receptor and opening an integral chloride channel.        |
| P | P47870 | DR | chloride channel activity                                                                                                                                                                         |
| P | P47946 | DE | Potassium transport protein 1;                                                                                                                                                                    |
| P | P47946 | DR | potassium ion transmembrane transporter activity                                                                                                                                                  |
| P | P48029 | CC | Required for the uptake of creatine in muscles and brain.                                                                                                                                         |
| P | P48029 | DE | Creatine transporter 1;                                                                                                                                                                           |
| P | P48029 | DE | Sodium- and chloride-dependent creatine transporter 1;                                                                                                                                            |
| P | P48029 | DE | Sodium- and chloride-dependent creatine transporter 1;                                                                                                                                            |
| P | P48029 | DR | creatine:sodium symporter activity                                                                                                                                                                |
| P | P48029 | DR | creatine:sodium symporter activity                                                                                                                                                                |
| P | P48029 | DR | neurotransmitter:sodium symporter activity                                                                                                                                                        |
| P | P48048 | CC | In the kidney, probably plays a major role in potassium homeostasis                                                                                                                               |
| P | P48048 | CC | Inward rectifier potassium channels are characterized by a greater tendency to allow potassium to flow into the cell rather than out of it                                                        |
| P | P48048 | CC | Their voltage dependence is regulated by the concentration of extracellular potassium; as external potassium is raised, the voltage range of the channel opening shifts to more positive voltages |
| P | P48048 | DE | ATP-regulated potassium channel ROM-K;                                                                                                                                                            |
| P | P48048 | DE | ATP-sensitive inward rectifier potassium channel 1;                                                                                                                                               |
| P | P48048 | DE | Inward rectifier K+ channel Kir1.1;                                                                                                                                                               |
| P | P48048 | DE | Potassium channel, inwardly rectifying subfamily J member 1;                                                                                                                                      |
| P | P48048 | DR | inward rectifier potassium channel activity                                                                                                                                                       |
| P | P48050 | CC | Inward rectifier potassium channels are characterized by a greater tendency to allow potassium to flow into the cell rather than out of it                                                        |
| P | P48050 | CC | Their voltage dependence is regulated by the concentration of extracellular potassium; as external potassium is raised, the voltage range of the channel opening shifts to more positive voltages |
| P | P48050 | DE | Inward rectifier K+ channel Kir2.3;                                                                                                                                                               |
| P | P48050 | DE | Inward rectifier potassium channel 4;                                                                                                                                                             |
| P | P48050 | DE | Potassium channel, inwardly rectifying subfamily J member 4;                                                                                                                                      |
| P | P48050 | DR | inward rectifier potassium channel activity                                                                                                                                                       |
| P | P48051 | CC | Inward rectifier potassium channels are characterized by a greater tendency to allow potassium to flow into the cell rather than out of it                                                        |
| P | P48051 | CC | Their voltage dependence is regulated by the concentration of extracellular potassium; as external potassium is raised, the voltage range of the channel opening shifts to more positive voltages |
| P | P48051 | CC | This potassium channel may be involved in the regulation of insulin secretion by glucose and/or neurotransmitters acting through G-protein-coupled receptors                                      |
| P | P48051 | DE | G protein-activated inward rectifier potassium channel 2;                                                                                                                                         |
| P | P48051 | DE | Inward rectifier K+ channel Kir3.2;                                                                                                                                                               |
| P | P48051 | DE | Potassium channel, inwardly rectifying subfamily J member 6;                                                                                                                                      |
| P | P48051 | DR | G-protein activated inward rectifier potassium channel activity                                                                                                                                   |
| P | P48065 | CC | may have a role in regulation of GABAergic transmission in the brain through the reuptake of GABA into presynaptic terminals, as well as in osmotic regulation                                    |
| P | P48065 | CC | Transports betaine and GABA                                                                                                                                                                       |
| P | P48065 | CC | Transports betaine and GABA                                                                                                                                                                       |
| P | P48065 | DE | Na+/Cl(-) betaine/GABA transporter;                                                                                                                                                               |
| P | P48065 | DE | Na+/Cl(-) betaine/GABA transporter;                                                                                                                                                               |
| P | P48065 | DE | Na+/Cl(-) betaine/GABA transporter;                                                                                                                                                               |
| P | P48065 | DE | Sodium- and chloride-dependent betaine transporter;                                                                                                                                               |
| P | P48065 | DE | Sodium- and chloride-dependent betaine transporter;                                                                                                                                               |
| P | P48065 | DR | gamma-aminobutyric acid:sodium symporter activity                                                                                                                                                 |
| P | P48065 | DR | gamma-aminobutyric acid:sodium symporter activity                                                                                                                                                 |
| P | P48065 | DR | neurotransmitter:sodium symporter activity                                                                                                                                                        |

|   |        |    |                                                                                                                                                                                                                                            |
|---|--------|----|--------------------------------------------------------------------------------------------------------------------------------------------------------------------------------------------------------------------------------------------|
| P | P48066 | CC | Terminates the action of GABA by its high affinity sodium-dependent reuptake into presynaptic terminals.                                                                                                                                   |
| P | P48066 | CC | Terminates the action of GABA by its high affinity sodium-dependent reuptake into presynaptic terminals.                                                                                                                                   |
| P | P48066 | DE | Sodium- and chloride-dependent GABA transporter 3;                                                                                                                                                                                         |
| P | P48066 | DE | Sodium- and chloride-dependent GABA transporter 3;                                                                                                                                                                                         |
| P | P48066 | DR | gamma-aminobutyric acid:sodium symporter activity                                                                                                                                                                                          |
| P | P48066 | DR | gamma-aminobutyric acid:sodium symporter activity                                                                                                                                                                                          |
| P | P48066 | DR | neurotransmitter:sodium symporter activity                                                                                                                                                                                                 |
| P | P48067 | CC | May play a role in regulation of glycine levels in NMDA receptor-mediated neurotransmission.                                                                                                                                               |
| P | P48067 | CC | Terminates the action of glycine by its high affinity sodium-dependent reuptake into presynaptic terminals                                                                                                                                 |
| P | P48067 | CC | Terminates the action of glycine by its high affinity sodium-dependent reuptake into presynaptic terminals                                                                                                                                 |
| P | P48067 | DE | Sodium- and chloride-dependent glycine transporter 1;                                                                                                                                                                                      |
| P | P48067 | DE | Sodium- and chloride-dependent glycine transporter 1;                                                                                                                                                                                      |
| P | P48067 | DR | glycine:sodium symporter activity                                                                                                                                                                                                          |
| P | P48067 | DR | glycine:sodium symporter activity                                                                                                                                                                                                          |
| P | P48067 | DR | neurotransmitter:sodium symporter activity                                                                                                                                                                                                 |
| P | P48169 | CC | GABA, the major inhibitory neurotransmitter in the vertebrate brain, mediates neuronal inhibition by binding to the GABA/benzodiazepine receptor and opening an integral chloride channel.                                                 |
| P | P48169 | DR | chloride channel activity                                                                                                                                                                                                                  |
| P | P48242 | CC | Part of the binding-protein-dependent transport system for glutamate.                                                                                                                                                                      |
| P | P48243 | CC | Part of the binding-protein-dependent transport system for glutamate                                                                                                                                                                       |
| P | P48243 | DE | Glutamate transport ATP-binding protein GluA;                                                                                                                                                                                              |
| P | P48244 | CC | Part of the binding-protein-dependent transport system for glutamate; probably responsible for the translocation of the substrate across the membrane.                                                                                     |
| P | P48244 | DE | Glutamate transport system permease protein gluC;                                                                                                                                                                                          |
| P | P48245 | CC | Part of the binding-protein-dependent transport system for glutamate; probably responsible for the translocation of the substrate across the membrane.                                                                                     |
| P | P48245 | DE | Glutamate transport system permease protein gluD;                                                                                                                                                                                          |
| P | P48543 | CC | Inward rectifier potassium channels are characterized by a greater tendency to allow potassium to flow into the cell rather than out of it                                                                                                 |
| P | P48543 | CC | Their voltage dependence is regulated by the concentration of extracellular potassium; as external potassium is raised, the voltage range of the channel opening shifts to more positive voltages                                          |
| P | P48543 | DE | G protein-activated inward rectifier potassium channel 3;                                                                                                                                                                                  |
| P | P48543 | DE | Inward rectifier K+ channel Kir3.3;                                                                                                                                                                                                        |
| P | P48543 | DE | Potassium channel, inwardly rectifying subfamily J member 9;                                                                                                                                                                               |
| P | P48543 | DR | G-protein activated inward rectifier potassium channel activity                                                                                                                                                                            |
| P | P48544 | CC | Inward rectifier potassium channels are characterized by a greater tendency to allow potassium to flow into the cell rather than out of it                                                                                                 |
| P | P48544 | CC | Their voltage dependence is regulated by the concentration of extracellular potassium; as external potassium is raised, the voltage range of the channel opening shifts to more positive voltages                                          |
| P | P48544 | CC | This potassium channel is controlled by G proteins                                                                                                                                                                                         |
| P | P48544 | DE | G protein-activated inward rectifier potassium channel 4;                                                                                                                                                                                  |
| P | P48544 | DE | Inward rectifier K+ channel Kir3.4;                                                                                                                                                                                                        |
| P | P48544 | DE | Potassium channel, inwardly rectifying subfamily J member 5;                                                                                                                                                                               |
| P | P48544 | DR | G-protein activated inward rectifier potassium channel activity                                                                                                                                                                            |
| P | P48547 | CC | Assuming opened or closed conformations in response to the voltage difference across the membrane, the protein forms a potassium-selective channel through which potassium ions may pass in accordance with their electrochemical gradient |
| P | P48547 | CC | Mediates the voltage-dependent potassium ion permeability of excitable membranes                                                                                                                                                           |
| P | P48547 | DE | Potassium voltage-gated channel subfamily C member 1;                                                                                                                                                                                      |
| P | P48547 | DE | Voltage-gated potassium channel subunit Kv3.1;                                                                                                                                                                                             |
| P | P48547 | DE | Voltage-gated potassium channel subunit Kv4;                                                                                                                                                                                               |
| P | P48547 | DR | voltage-gated potassium channel activity                                                                                                                                                                                                   |
| P | P48549 | CC | Inward rectifier potassium channels are characterized by a greater tendency to allow potassium to flow into the cell rather than out of it                                                                                                 |
| P | P48549 | CC | Their voltage dependence is regulated by the concentration of extracellular potassium; as external potassium is raised, the voltage range of the channel opening shifts to more positive voltages                                          |



|   |        |    |                                                                                                                                                                                            |
|---|--------|----|--------------------------------------------------------------------------------------------------------------------------------------------------------------------------------------------|
| P | P48549 | CC | This potassium channel is controlled by G proteins                                                                                                                                         |
| P | P48549 | DE | G protein-activated inward rectifier potassium channel 1;                                                                                                                                  |
| P | P48549 | DE | Inward rectifier K <sup>+</sup> channel Kir3.1;                                                                                                                                            |
| P | P48549 | DE | Potassium channel, inwardly rectifying subfamily J member 3;                                                                                                                               |
| P | P48549 | DR | G-protein activated inward rectifier potassium channel activity                                                                                                                            |
| P | P48664 | CC | Seems to act as a symport by cotransporting sodium.                                                                                                                                        |
| P | P48664 | CC | Transports L-glutamate and also L- and D-aspartate                                                                                                                                         |
| P | P48664 | DE | Sodium-dependent glutamate/aspartate transporter;                                                                                                                                          |
| P | P48664 | DE | Sodium-dependent glutamate/aspartate transporter;                                                                                                                                          |
| P | P48664 | DE | Sodium-dependent glutamate/aspartate transporter;                                                                                                                                          |
| P | P48664 | DR | high-affinity glutamate transmembrane transporter activity                                                                                                                                 |
| P | P48664 | DR | sodium:dicarboxylate symporter activity                                                                                                                                                    |
| P | P48764 | CC | major proton extruding system driven by the inward sodium ion chemical gradient                                                                                                            |
| P | P48764 | DE | Na <sup>+</sup> /H <sup>+</sup> exchanger 3;                                                                                                                                               |
| P | P48764 | DE | Sodium/hydrogen exchanger 3;                                                                                                                                                               |
| P | P48764 | DR | sodium:hydrogen antiporter activity                                                                                                                                                        |
| P | P48777 | DE | Purine permease;                                                                                                                                                                           |
| P | P48813 | CC | High affinity transport of glutamine                                                                                                                                                       |
| P | P48813 | DE | High-affinity glutamine permease;                                                                                                                                                          |
| P | P48962 | CC | Catalyzes the exchange of ADP and ATP across the mitochondrial inner membrane                                                                                                              |
| P | P48962 | CC | Catalyzes the exchange of ADP and ATP across the mitochondrial inner membrane                                                                                                              |
| P | P48962 | DE | ADP,ATP carrier protein 1;                                                                                                                                                                 |
| P | P48962 | DE | ADP,ATP carrier protein, heart/skeletal muscle isoform T1;                                                                                                                                 |
| P | P48962 | DE | ADP/ATP translocase 1;                                                                                                                                                                     |
| P | P48962 | DE | ADP/ATP translocase 1;                                                                                                                                                                     |
| P | P48995 | CC | Seems to be also activated by intracellular calcium store depletion.                                                                                                                       |
| P | P48995 | CC | thought to form a receptor-activated non-selective calcium permeant cation channel                                                                                                         |
| P | P48995 | DR | store-operated calcium channel activity                                                                                                                                                    |
| P | P49279 | CC | Divalent transition metal (iron and manganese) transporter involved in iron metabolism and host resistance to certain pathogens                                                            |
| P | P49279 | DR | metal ion:hydrogen antiporter activity                                                                                                                                                     |
| P | P49281 | CC | Important in metal transport, in particular iron                                                                                                                                           |
| P | P49573 | CC | Required for high affinity copper (probably reduced Cu I) transport into the cell.                                                                                                         |
| P | P49573 | DE | Copper transport protein CTR1;                                                                                                                                                             |
| P | P49573 | DE | Copper transporter 1;                                                                                                                                                                      |
| P | P49573 | DR | copper uptake transmembrane transporter activity                                                                                                                                           |
| P | P50077 | CC | Functions together with MID1 to ensure that adequate levels of Ca <sup>2+</sup> are supplied to PMR1 to sustain secretion and growth                                                       |
| P | P50077 | CC | voltage-gated, high-affinity calcium channel involved in calcium influx in response to some environmental stresses as well as exposure to mating pheromones                                |
| P | P50077 | DE | Calcium-channel protein CCH1;                                                                                                                                                              |
| P | P50077 | DR | calcium channel activity                                                                                                                                                                   |
| P | P50276 | CC | High affinity permease for methionine.                                                                                                                                                     |
| P | P50276 | DE | High-affinity methionine permease;                                                                                                                                                         |
| P | P50276 | DR | L-methionine secondary active transmembrane transporter activity                                                                                                                           |
| P | P50334 | DR | sodium:dicarboxylate symporter activity                                                                                                                                                    |
| P | P50334 | DR | sodium:dicarboxylate symporter activity                                                                                                                                                    |
| P | P50443 | CC | Sulfate transporter                                                                                                                                                                        |
| P | P50443 | DE | Sulfate transporter;                                                                                                                                                                       |
| P | P50443 | DR | secondary active sulfate transmembrane transporter activity                                                                                                                                |
| P | P50487 | DE | Putative purine permease CPE0397;                                                                                                                                                          |
| P | P50537 | CC | Permease for malate and other C4 dicarboxylic acids.                                                                                                                                       |
| P | P50537 | DE | Malate permease;                                                                                                                                                                           |
| P | P50537 | DE | Malic acid transport protein;                                                                                                                                                              |
| P | P50537 | DR | malate transmembrane transporter activity                                                                                                                                                  |
| P | P50571 | CC | GABA, the major inhibitory neurotransmitter in the vertebrate brain, mediates neuronal inhibition by binding to the GABA/benzodiazepine receptor and opening an integral chloride channel. |
| P | P50571 | DR | chloride channel activity                                                                                                                                                                  |
| P | P50976 | CC | This system is involved in lactose transport.                                                                                                                                              |
| P | P50976 | DE | Lactose permease IIC component;                                                                                                                                                            |
| P | P50976 | DE | Lactose-specific phosphotransferase enzyme IIB component;                                                                                                                                  |
| P | P50976 | DE | PTS system lactose-specific EIIB component;                                                                                                                                                |
| P | P50976 | DE | PTS system lactose-specific EIIC component;                                                                                                                                                |
| P | P50976 | DE | PTS system lactose-specific EIICB component;                                                                                                                                               |

|   |        |    |                                                                                                                                                                                                                                                                            |
|---|--------|----|----------------------------------------------------------------------------------------------------------------------------------------------------------------------------------------------------------------------------------------------------------------------------|
| P | P50980 | DE | Oligopeptide transport ATP-binding protein OppD;                                                                                                                                                                                                                           |
| P | P50992 | DE | Gastric H <sup>+</sup> /K <sup>+</sup> ATPase subunit beta;                                                                                                                                                                                                                |
| P | P50992 | DE | Potassium-transporting ATPase subunit beta;                                                                                                                                                                                                                                |
| P | P50992 | DR | sodium:potassium-exchanging ATPase activity                                                                                                                                                                                                                                |
| P | P50992 | DR | sodium:potassium-exchanging ATPase activity                                                                                                                                                                                                                                |
| P | P50993 | CC | This action creates the electrochemical gradient of sodium and potassium, providing the energy for active transport of various nutrients.                                                                                                                                  |
| P | P50993 | CC | This action creates the electrochemical gradient of sodium and potassium, providing the energy for active transport of various nutrients.                                                                                                                                  |
| P | P50993 | CC | This is the catalytic component of the active enzyme, which catalyzes the hydrolysis of ATP coupled with the exchange of sodium and potassium ions across the plasma membrane                                                                                              |
| P | P50993 | CC | This is the catalytic component of the active enzyme, which catalyzes the hydrolysis of ATP coupled with the exchange of sodium and potassium ions across the plasma membrane                                                                                              |
| P | P50993 | DE | Na <sup>+</sup> /K <sup>+</sup> ATPase alpha-2 subunit;                                                                                                                                                                                                                    |
| P | P50993 | DE | Na <sup>+</sup> /K <sup>+</sup> ATPase alpha-2 subunit;                                                                                                                                                                                                                    |
| P | P50993 | DE | Sodium pump subunit alpha-2;                                                                                                                                                                                                                                               |
| P | P50993 | DE | Sodium/potassium-transporting ATPase subunit alpha-2;                                                                                                                                                                                                                      |
| P | P50993 | DE | Sodium/potassium-transporting ATPase subunit alpha-2;                                                                                                                                                                                                                      |
| P | P50993 | DR | sodium:potassium-exchanging ATPase activity                                                                                                                                                                                                                                |
| P | P50993 | DR | sodium:potassium-exchanging ATPase activity                                                                                                                                                                                                                                |
| P | P51000 | DE | Dipeptide transport system permease protein dppC;                                                                                                                                                                                                                          |
| P | P51164 | DE | Gastric H <sup>+</sup> /K <sup>+</sup> ATPase subunit beta;                                                                                                                                                                                                                |
| P | P51164 | DE | Gastric H <sup>+</sup> /K <sup>+</sup> ATPase subunit beta;                                                                                                                                                                                                                |
| P | P51164 | DE | Potassium-transporting ATPase subunit beta;                                                                                                                                                                                                                                |
| P | P51164 | DR | hydrogen:potassium-exchanging ATPase activity                                                                                                                                                                                                                              |
| P | P51164 | DR | sodium:potassium-exchanging ATPase activity                                                                                                                                                                                                                                |
| P | P51164 | DR | sodium:potassium-exchanging ATPase activity                                                                                                                                                                                                                                |
| P | P51168 | CC | Controls the reabsorption of sodium in kidney, colon, lung and sweat glands                                                                                                                                                                                                |
| P | P51168 | CC | Sodium permeable non-voltage-sensitive ion channel inhibited by the diuretic amiloride                                                                                                                                                                                     |
| P | P51168 | DE | Amiloride-sensitive sodium channel subunit beta;                                                                                                                                                                                                                           |
| P | P51168 | DE | Epithelial Na <sup>+</sup> channel subunit beta;                                                                                                                                                                                                                           |
| P | P51168 | DE | Nonvoltage-gated sodium channel 1 subunit beta;                                                                                                                                                                                                                            |
| P | P51168 | DR | ligand-gated sodium channel activity                                                                                                                                                                                                                                       |
| P | P51172 | CC | Controls the reabsorption of sodium in kidney, colon, lung and sweat glands                                                                                                                                                                                                |
| P | P51172 | CC | Sodium permeable non-voltage-sensitive ion channel inhibited by the diuretic amiloride                                                                                                                                                                                     |
| P | P51172 | DE | Amiloride-sensitive sodium channel subunit delta;                                                                                                                                                                                                                          |
| P | P51172 | DE | Epithelial Na <sup>+</sup> channel subunit delta;                                                                                                                                                                                                                          |
| P | P51172 | DE | Nonvoltage-gated sodium channel 1 subunit delta;                                                                                                                                                                                                                           |
| P | P51172 | DR | ligand-gated sodium channel activity                                                                                                                                                                                                                                       |
| P | P51180 | CC | Water channel                                                                                                                                                                                                                                                              |
| P | P51180 | DR | water channel activity                                                                                                                                                                                                                                                     |
| P | P51574 | DE | Intestinal H <sup>+</sup> /peptide cotransporter;                                                                                                                                                                                                                          |
| P | P51787 | CC | Associates with KCNE1 (MinK) to form the I(Ks) cardiac potassium current                                                                                                                                                                                                   |
| P | P51787 | CC | Elicits a rapidly activating, potassium-selective outward current                                                                                                                                                                                                          |
| P | P51787 | CC | May associate also with KCNE3 (MiRP2) to form the potassium channel that is important for cyclic AMP-stimulated intestinal secretion of chloride ions, which is reduced in cystic fibrosis and pathologically stimulated in cholera and other forms of secretory diarrhea. |
| P | P51787 | DE | IKs producing slow voltage-gated potassium channel subunit alpha KvLQT1;                                                                                                                                                                                                   |
| P | P51787 | DE | Potassium voltage-gated channel subfamily KQT member 1;                                                                                                                                                                                                                    |
| P | P51787 | DE | Voltage-gated potassium channel subunit Kv7.1;                                                                                                                                                                                                                             |
| P | P51787 | DR | delayed rectifier potassium channel activity                                                                                                                                                                                                                               |
| P | P51788 | CC | Chloride channels have several functions including the regulation of cell volume; membrane potential stabilization, signal transduction and transepithelial transport                                                                                                      |
| P | P51788 | CC | Voltage-gated chloride channel                                                                                                                                                                                                                                             |
| P | P51788 | DE | Chloride channel protein 2;                                                                                                                                                                                                                                                |
| P | P51788 | DR | voltage-gated chloride channel activity                                                                                                                                                                                                                                    |
| P | P51790 | CC | Mediates the exchange of chloride ions against protons                                                                                                                                                                                                                     |
| P | P51790 | DE | Chloride channel protein 3;                                                                                                                                                                                                                                                |
| P | P51790 | DE | Chloride transporter ClC-3;                                                                                                                                                                                                                                                |
| P | P51790 | DR | voltage-gated chloride channel activity                                                                                                                                                                                                                                    |
| P | P51791 | CC | Mediates the exchange of chloride ions against protons                                                                                                                                                                                                                     |
| P | P51791 | DE | Chloride channel protein 3;                                                                                                                                                                                                                                                |

|   |        |    |                                                                                                                                                                       |
|---|--------|----|-----------------------------------------------------------------------------------------------------------------------------------------------------------------------|
| P | P51791 | DE | Chloride transporter ClC-3;                                                                                                                                           |
| P | P51791 | DR | voltage-gated chloride channel activity                                                                                                                               |
| P | P51793 | CC | Functions as antiport system and exchanges chloride ions against protons.                                                                                             |
| P | P51793 | CC | Proton-coupled chloride transporter                                                                                                                                   |
| P | P51793 | DE | Chloride channel protein 4;                                                                                                                                           |
| P | P51793 | DE | Chloride transporter ClC-4;                                                                                                                                           |
| P | P51793 | DR | voltage-gated chloride channel activity                                                                                                                               |
| P | P51795 | CC | Functions as antiport system and exchanges chloride ions against protons                                                                                              |
| P | P51795 | CC | Proton-coupled chloride transporter                                                                                                                                   |
| P | P51795 | DE | Chloride channel protein 5;                                                                                                                                           |
| P | P51795 | DE | Chloride transporter ClC-5;                                                                                                                                           |
| P | P51798 | CC | Mediates the exchange of chloride ions against protons                                                                                                                |
| P | P51798 | DE | Chloride channel protein 7;                                                                                                                                           |
| P | P51798 | DR | voltage-gated chloride channel activity                                                                                                                               |
| P | P51800 | CC | Chloride channels have several functions including the regulation of cell volume; membrane potential stabilization, signal transduction and transepithelial transport |
| P | P51800 | CC | Voltage-gated chloride channel                                                                                                                                        |
| P | P51800 | DE | Chloride channel Ka;                                                                                                                                                  |
| P | P51800 | DE | Chloride channel protein ClC-Ka;                                                                                                                                      |
| P | P51800 | DR | voltage-gated chloride channel activity                                                                                                                               |
| P | P51801 | CC | Chloride channels have several functions including the regulation of cell volume; membrane potential stabilization, signal transduction and transepithelial transport |
| P | P51801 | CC | Voltage-gated chloride channel                                                                                                                                        |
| P | P51801 | DE | Chloride channel Kb;                                                                                                                                                  |
| P | P51801 | DE | Chloride channel protein ClC-Kb;                                                                                                                                      |
| P | P51801 | DR | voltage-gated chloride channel activity                                                                                                                               |
| P | P51881 | CC | Catalyzes the exchange of ADP and ATP across the mitochondrial inner membrane                                                                                         |
| P | P51881 | CC | Catalyzes the exchange of ADP and ATP across the mitochondrial inner membrane                                                                                         |
| P | P51881 | DE | ADP,ATP carrier protein 2;                                                                                                                                            |
| P | P51881 | DE | ADP/ATP translocase 2;                                                                                                                                                |
| P | P51881 | DE | ADP/ATP translocase 2;                                                                                                                                                |
| P | P51905 | CC | Terminates the action of serotonin by its high affinity sodium-dependent reuptake into presynaptic terminals.                                                         |
| P | P51905 | CC | Terminates the action of serotonin by its high affinity sodium-dependent reuptake into presynaptic terminals.                                                         |
| P | P51905 | DE | Cocaine-sensitive serotonin transporter;                                                                                                                              |
| P | P51905 | DE | Sodium-dependent serotonin transporter;                                                                                                                               |
| P | P51905 | DE | Sodium-dependent serotonin transporter;                                                                                                                               |
| P | P51905 | DR | neurotransmitter:sodium symporter activity                                                                                                                            |
| P | P51905 | DR | serotonin transmembrane transporter activity                                                                                                                          |
| P | P51906 | CC | Acts as a symport by cotransporting sodium                                                                                                                            |
| P | P51906 | CC | Essential for terminating the postsynaptic action of glutamate by rapidly removing released glutamate from the synaptic cleft                                         |
| P | P51906 | CC | Transports L-glutamate and also L- and D-aspartate                                                                                                                    |
| P | P51906 | DE | Sodium-dependent glutamate/aspartate transporter 3;                                                                                                                   |
| P | P51906 | DE | Sodium-dependent glutamate/aspartate transporter 3;                                                                                                                   |
| P | P51906 | DE | Sodium-dependent glutamate/aspartate transporter 3;                                                                                                                   |
| P | P51906 | DR | glutamate:sodium symporter activity                                                                                                                                   |
| P | P51906 | DR | glutamate:sodium symporter activity                                                                                                                                   |
| P | P51906 | DR | sodium:dicarboxylate symporter activity                                                                                                                               |
| P | P51912 | DE | ASC-like Na+-dependent neutral amino acid transporter ASCT2;                                                                                                          |
| P | P51912 | DE | Sodium-dependent neutral amino acid transporter type 2;                                                                                                               |
| P | P51912 | DR | sodium:dicarboxylate symporter activity                                                                                                                               |
| P | P52280 | CC | Glycerol enters the cell via the glycerol diffusion facilitator protein                                                                                               |
| P | P52280 | CC | This membrane protein facilitates the movement of glycerol across the cytoplasmic membrane (By similarity).                                                           |
| P | P52280 | DE | Probable glycerol uptake facilitator protein;                                                                                                                         |
| P | P53048 | CC | High-affinity uptake of alpha-glucosides such as maltose, turanose, isomaltose, alpha-methylglucoside, maltotriose, palatinose, trehalose, melezitose and glucose     |
| P | P53154 | CC | Involved in active uptake of glycerol driven by electrogenic proton symport.                                                                                          |
| P | P53154 | DE | Glycerol uptake protein 1;                                                                                                                                            |
| P | P53388 | CC | Can transport glutamate, aspartate, glutamine, asparagine, serine, alanine and glycine                                                                                |
| P | P53388 | CC | Can transport glutamate, aspartate, glutamine, asparagine, serine, alanine and glycine                                                                                |
| P | P53403 | CC | Facilitative glucose transporter.                                                                                                                                     |
| P | P53403 | DE | Glucose transporter type 3;                                                                                                                                           |

|   |        |    |                                                                                                                                                                                                                                                         |
|---|--------|----|---------------------------------------------------------------------------------------------------------------------------------------------------------------------------------------------------------------------------------------------------------|
| P | P53403 | DE | Glucose transporter-like protein;                                                                                                                                                                                                                       |
| P | P53631 | DE | Hexose transporter HXT17;                                                                                                                                                                                                                               |
| P | P53794 | CC | Prevents intracellular accumulation of high concentrations of myo-inositol (an osmolyte) that result in impairment of cellular function.                                                                                                                |
| P | P53794 | DE | Na <sup>+</sup> /myo-inositol cotransporter;                                                                                                                                                                                                            |
| P | P53794 | DE | Na <sup>+</sup> /myo-inositol cotransporter;                                                                                                                                                                                                            |
| P | P53794 | DE | Sodium/myo-inositol cotransporter;                                                                                                                                                                                                                      |
| P | P53794 | DE | Sodium/myo-inositol cotransporter;                                                                                                                                                                                                                      |
| P | P53794 | DR | myo-inositol:sodium symporter activity                                                                                                                                                                                                                  |
| P | P53794 | DR | myo-inositol:sodium symporter activity                                                                                                                                                                                                                  |
| P | P53985 | CC | Catalyzes the rapid transport across the plasma membrane of many monocarboxylates such as lactate, pyruvate, branched-chain oxo acids derived from leucine, valine and isoleucine, and the ketone bodies acetoacetate, beta-hydroxybutyrate and acetate |
| P | P53985 | CC | Proton-linked monocarboxylate transporter                                                                                                                                                                                                               |
| P | P53985 | DE | Monocarboxylate transporter 1;                                                                                                                                                                                                                          |
| P | P53985 | DR | secondary active monocarboxylate transmembrane transporter activity                                                                                                                                                                                     |
| P | P53986 | CC | Proton-linked monocarboxylate transporter                                                                                                                                                                                                               |
| P | P53986 | DE | Monocarboxylate transporter 1;                                                                                                                                                                                                                          |
| P | P53986 | DR | secondary active monocarboxylate transmembrane transporter activity                                                                                                                                                                                     |
| P | P54104 | CC | Component of the transport system for branched-chain amino acids (leucine, isoleucine and valine) Which is coupled to a proton motive force.                                                                                                            |
| P | P54104 | CC | Component of the transport system for branched-chain amino acids (leucine, isoleucine and valine) Which is coupled to a proton motive force.                                                                                                            |
| P | P54417 | CC | High-affinity uptake of glycine betaine.                                                                                                                                                                                                                |
| P | P54417 | DE | Glycine betaine transporter OpuD;                                                                                                                                                                                                                       |
| P | P54535 | CC | Part of a binding-protein-dependent transport system for arginine.                                                                                                                                                                                      |
| P | P54535 | DE | Arginine-binding extracellular protein ArtP;                                                                                                                                                                                                            |
| P | P54536 | CC | Part of a binding-protein-dependent transport system for arginine                                                                                                                                                                                       |
| P | P54536 | DE | Arginine transport system permease protein ArtQ;                                                                                                                                                                                                        |
| P | P54537 | CC | Part of a binding-protein-dependent transport system for arginine                                                                                                                                                                                       |
| P | P54537 | DE | Arginine transport ATP-binding protein ArtM;                                                                                                                                                                                                            |
| P | P54678 | CC | Calcium ATPase involved in Ca <sup>2+</sup> homeostasis as a component of the contractile vacuole complex.                                                                                                                                              |
| P | P54678 | DE | Calcium-transporting ATPase PAT1;                                                                                                                                                                                                                       |
| P | P54678 | DR | calcium-transporting ATPase activity                                                                                                                                                                                                                    |
| P | P54707 | CC | Catalyzes the hydrolysis of ATP coupled with the exchange of H <sup>+</sup> and K <sup>+</sup> ions across the plasma membrane                                                                                                                          |
| P | P54707 | CC | Responsible for potassium absorption in various tissues.                                                                                                                                                                                                |
| P | P54707 | DE | Non-gastric H <sup>+</sup> /K <sup>+</sup> ATPase subunit alpha;                                                                                                                                                                                        |
| P | P54707 | DE | Potassium-transporting ATPase alpha chain 2;                                                                                                                                                                                                            |
| P | P54707 | DR | hydrogen:potassium-exchanging ATPase activity                                                                                                                                                                                                           |
| P | P54709 | CC | This is the non-catalytic component of the active enzyme, which catalyzes the hydrolysis of ATP coupled with the exchange of Na <sup>+</sup> and K <sup>+</sup> ions across the plasma membrane                                                         |
| P | P54709 | CC | This is the non-catalytic component of the active enzyme, which catalyzes the hydrolysis of ATP coupled with the exchange of Na <sup>+</sup> and K <sup>+</sup> ions across the plasma membrane                                                         |
| P | P54709 | DE | Sodium/potassium-dependent ATPase subunit beta-3;                                                                                                                                                                                                       |
| P | P54709 | DE | Sodium/potassium-dependent ATPase subunit beta-3;                                                                                                                                                                                                       |
| P | P54709 | DE | Sodium/potassium-transporting ATPase subunit beta-3;                                                                                                                                                                                                    |
| P | P54709 | DE | Sodium/potassium-transporting ATPase subunit beta-3;                                                                                                                                                                                                    |
| P | P54709 | DR | sodium:potassium-exchanging ATPase activity                                                                                                                                                                                                             |
| P | P54709 | DR | sodium:potassium-exchanging ATPase activity                                                                                                                                                                                                             |
| P | P54710 | CC | May be involved in forming the receptor site for cardiac glycoside binding or may modulate the transport function of the sodium ATPase.                                                                                                                 |
| P | P54710 | DE | Na <sup>+</sup> /K <sup>+</sup> ATPase subunit gamma;                                                                                                                                                                                                   |
| P | P54710 | DE | Na <sup>+</sup> /K <sup>+</sup> ATPase subunit gamma;                                                                                                                                                                                                   |
| P | P54710 | DE | Sodium pump gamma chain;                                                                                                                                                                                                                                |
| P | P54710 | DE | Sodium/potassium-transporting ATPase subunit gamma;                                                                                                                                                                                                     |
| P | P54710 | DE | Sodium/potassium-transporting ATPase subunit gamma;                                                                                                                                                                                                     |
| P | P54710 | DR | sodium:potassium-exchanging ATPase activity                                                                                                                                                                                                             |
| P | P54710 | DR | sodium:potassium-exchanging ATPase activity                                                                                                                                                                                                             |
| P | P54854 | DE | Hexose transporter HXT15;                                                                                                                                                                                                                               |
| P | P54862 | CC | Probable glucose transporter.                                                                                                                                                                                                                           |
| P | P54862 | DE | Low-affinity glucose transporter LGT3;                                                                                                                                                                                                                  |
| P | P54862 | DR | glucose transmembrane transporter activity                                                                                                                                                                                                              |
| P | P55011 | CC | Mediates sodium and chloride reabsorption                                                                                                                                                                                                               |

|   |        |    |                                                                                                                                                                                                                       |
|---|--------|----|-----------------------------------------------------------------------------------------------------------------------------------------------------------------------------------------------------------------------|
| P | P55011 | CC | Mediates sodium and chloride reabsorption                                                                                                                                                                             |
| P | P55011 | DE | Bumetanide-sensitive sodium-(potassium)-chloride cotransporter 1;                                                                                                                                                     |
| P | P55011 | DR | sodium:potassium:chloride symporter activity                                                                                                                                                                          |
| P | P55011 | DR | sodium:potassium:chloride symporter activity                                                                                                                                                                          |
| P | P55011 | DR | sodium:potassium:chloride symporter activity                                                                                                                                                                          |
| P | P55012 | CC | Mediates sodium and chloride reabsorption                                                                                                                                                                             |
| P | P55012 | DE | Bumetanide-sensitive sodium-(potassium)-chloride cotransporter 1;                                                                                                                                                     |
| P | P55014 | CC | Mediates sodium and chloride reabsorption                                                                                                                                                                             |
| P | P55014 | CC | Mediates sodium and chloride reabsorption                                                                                                                                                                             |
| P | P55014 | DE | Bumetanide-sensitive sodium-(potassium)-chloride cotransporter 2;                                                                                                                                                     |
| P | P55017 | CC | Mediates sodium and chloride reabsorption.                                                                                                                                                                            |
| P | P55017 | CC | Mediates sodium and chloride reabsorption.                                                                                                                                                                            |
| P | P55017 | DE | Thiazide-sensitive sodium-chloride cotransporter;                                                                                                                                                                     |
| P | P55017 | DR | sodium:chloride symporter activity                                                                                                                                                                                    |
| P | P55017 | DR | sodium:chloride symporter activity                                                                                                                                                                                    |
| P | P55018 | CC | Mediates sodium and chloride reabsorption.                                                                                                                                                                            |
| P | P55018 | CC | Mediates sodium and chloride reabsorption.                                                                                                                                                                            |
| P | P55018 | DE | Thiazide-sensitive sodium-chloride cotransporter;                                                                                                                                                                     |
| P | P55018 | DR | sodium:chloride symporter activity                                                                                                                                                                                    |
| P | P55018 | DR | sodium:chloride symporter activity                                                                                                                                                                                    |
| P | P55064 | CC | Forms a water-specific channel                                                                                                                                                                                        |
| P | P55064 | DR | water channel activity                                                                                                                                                                                                |
| P | P55069 | CC | Can also transport citrate in complex with Ni(2+), Mn(2+), Co(2+), and Zn(2+).                                                                                                                                        |
| P | P55069 | CC | Cotransports at least two protons per Mg2+-citrate complex                                                                                                                                                            |
| P | P55069 | CC | Proton motive force-driven secondary transporter that mediates the transport of citrate complexed to Mg2+                                                                                                             |
| P | P55069 | CC | Proton motive force-driven secondary transporter that mediates the transport of citrate complexed to Mg2+                                                                                                             |
| P | P55069 | DE | Mg2+/citrate complex secondary transporter;                                                                                                                                                                           |
| P | P55069 | DE | Mg2+/citrate complex secondary transporter;                                                                                                                                                                           |
| P | P55069 | DR | citrate transmembrane transporter activity                                                                                                                                                                            |
| P | P55087 | CC | Forms a water-specific channel                                                                                                                                                                                        |
| P | P55087 | CC | Osmoreceptor which regulates body water balance and mediates water flow within the central nervous system.                                                                                                            |
| P | P55087 | DE | Mercurial-insensitive water channel;                                                                                                                                                                                  |
| P | P55087 | DR | water channel activity                                                                                                                                                                                                |
| P | P55088 | CC | Forms a water-specific channel                                                                                                                                                                                        |
| P | P55088 | CC | Osmoreceptor which regulates body water balance and mediates water flow within the central nervous system.                                                                                                            |
| P | P55088 | DE | Mercurial-insensitive water channel;                                                                                                                                                                                  |
| P | P55088 | DR | water channel activity                                                                                                                                                                                                |
| P | P55989 | CC | Probably involved in copper export.                                                                                                                                                                                   |
| P | P55989 | DE | Copper-transporting ATPase;                                                                                                                                                                                           |
| P | P55989 | DR | copper-exporting ATPase activity                                                                                                                                                                                      |
| P | P56402 | CC | Forms a water-specific channel that provides the plasma membranes of renal collecting duct with high permeability to water, thereby permitting water to move in the direction of an osmotic gradient (By similarity). |
| P | P56402 | DE | ADH water channel;                                                                                                                                                                                                    |
| P | P56402 | DE | Collecting duct water channel protein;                                                                                                                                                                                |
| P | P56402 | DE | Water channel protein for renal collecting duct;                                                                                                                                                                      |
| P | P56402 | DR | water channel activity                                                                                                                                                                                                |
| P | P56475 | CC | GABA, the major inhibitory neurotransmitter in the vertebrate brain, mediates neuronal inhibition by binding to the GABA/benzodiazepine receptor and opening an integral chloride channel                             |
| P | P56475 | DR | chloride channel activity                                                                                                                                                                                             |
| P | P56564 | CC | Acts as a symport by cotransporting sodium.                                                                                                                                                                           |
| P | P56564 | CC | Essential for terminating the postsynaptic action of glutamate by rapidly removing released glutamate from the synaptic cleft                                                                                         |
| P | P56564 | CC | Transports L-glutamate and also L- and D-aspartate                                                                                                                                                                    |
| P | P56564 | DE | Glial high affinity glutamate transporter;                                                                                                                                                                            |
| P | P56564 | DE | High-affinity neuronal glutamate transporter;                                                                                                                                                                         |
| P | P56564 | DE | Sodium-dependent glutamate/aspartate transporter 1;                                                                                                                                                                   |
| P | P56564 | DE | Sodium-dependent glutamate/aspartate transporter 1;                                                                                                                                                                   |
| P | P56564 | DR | high-affinity glutamate transmembrane transporter activity                                                                                                                                                            |
| P | P56564 | DR | sodium:dicarboxylate symporter activity                                                                                                                                                                               |

|   |        |    |                                                                                                                                                                                                            |
|---|--------|----|------------------------------------------------------------------------------------------------------------------------------------------------------------------------------------------------------------|
| P | P56696 | CC | May underlie a potassium current involved in regulating the excitability of sensory cells of the cochlea                                                                                                   |
| P | P56696 | DE | Potassium channel subunit alpha KvLQT4;                                                                                                                                                                    |
| P | P56696 | DE | Potassium voltage-gated channel subfamily KQT member 4;                                                                                                                                                    |
| P | P56696 | DE | Voltage-gated potassium channel subunit Kv7.4;                                                                                                                                                             |
| P | P56949 | DE | Putative malonate transporter;                                                                                                                                                                             |
| P | P57031 | DE | Lipoprotein-releasing system ATP-binding protein LolD;                                                                                                                                                     |
| P | P57031 | DR | lipoprotein transporter activity                                                                                                                                                                           |
| P | P57057 | DE | Glycerol-3-phosphate permease;                                                                                                                                                                             |
| P | P57057 | DE | Glycerol-3-phosphate transporter;                                                                                                                                                                          |
| P | P57066 | DE | Lipoprotein-releasing system ATP-binding protein LolD;                                                                                                                                                     |
| P | P57066 | DR | lipoprotein transporter activity                                                                                                                                                                           |
| P | P57103 | CC | Ca <sup>2+</sup> is extruded from the cell during relaxation so as to prevent overloading of intracellular stores (By similarity).                                                                         |
| P | P57103 | CC | Rapidly transports Ca <sup>2+</sup> during excitation-contraction coupling                                                                                                                                 |
| P | P57103 | DE | Na <sup>+</sup> /Ca <sup>2+</sup> -exchange protein 3;                                                                                                                                                     |
| P | P57103 | DE | Na <sup>+</sup> /Ca <sup>2+</sup> -exchange protein 3;                                                                                                                                                     |
| P | P57103 | DE | Sodium/calcium exchanger 3;                                                                                                                                                                                |
| P | P57103 | DE | Sodium/calcium exchanger 3;                                                                                                                                                                                |
| P | P57103 | DR | calcium:sodium antiporter activity                                                                                                                                                                         |
| P | P57103 | DR | calcium:sodium antiporter activity                                                                                                                                                                         |
| P | P57683 | CC | One of the components of the high-affinity ATP-driven potassium transport (or KDP) system, which catalyzes the hydrolysis of ATP coupled with the exchange of hydrogen and potassium ions (By similarity). |
| P | P57683 | DE | Potassium-binding and translocating subunit A;                                                                                                                                                             |
| P | P57683 | DE | Potassium-translocating ATPase A chain;                                                                                                                                                                    |
| P | P57683 | DE | Potassium-transporting ATPase A chain;                                                                                                                                                                     |
| P | P57683 | DR | potassium-transporting ATPase activity                                                                                                                                                                     |
| P | P57686 | CC | One of the components of the high-affinity ATP-driven potassium transport (or KDP) system, which catalyzes the hydrolysis of ATP coupled with the exchange of hydrogen and potassium ions                  |
| P | P57686 | DE | Potassium-binding and translocating subunit C;                                                                                                                                                             |
| P | P57686 | DE | Potassium-translocating ATPase C chain;                                                                                                                                                                    |
| P | P57686 | DE | Potassium-transporting ATPase C chain;                                                                                                                                                                     |
| P | P57686 | DR | potassium-transporting ATPase activity                                                                                                                                                                     |
| P | P57688 | CC | One of the components of the high-affinity ATP-driven potassium transport (or KDP) system, which catalyzes the hydrolysis of ATP coupled with the exchange of hydrogen and potassium ions                  |
| P | P57688 | DE | Potassium-binding and translocating subunit C;                                                                                                                                                             |
| P | P57688 | DE | Potassium-translocating ATPase C chain;                                                                                                                                                                    |
| P | P57688 | DE | Potassium-transporting ATPase C chain;                                                                                                                                                                     |
| P | P57688 | DR | potassium-transporting ATPase activity                                                                                                                                                                     |
| P | P57698 | CC | One of the components of the high-affinity ATP-driven potassium transport (or KDP) system, which catalyzes the hydrolysis of ATP coupled with the exchange of hydrogen and potassium ions (By similarity). |
| P | P57698 | DE | Potassium-binding and translocating subunit B;                                                                                                                                                             |
| P | P57698 | DE | Potassium-translocating ATPase B chain;                                                                                                                                                                    |
| P | P57698 | DE | Potassium-transporting ATPase B chain;                                                                                                                                                                     |
| P | P57698 | DR | potassium-transporting ATPase activity                                                                                                                                                                     |
| P | P57700 | CC | One of the components of the high-affinity ATP-driven potassium transport (or KDP) system, which catalyzes the hydrolysis of ATP coupled with the exchange of hydrogen and potassium ions (By similarity). |
| P | P57700 | DE | Potassium-binding and translocating subunit B;                                                                                                                                                             |
| P | P57700 | DE | Potassium-translocating ATPase B chain;                                                                                                                                                                    |
| P | P57700 | DE | Potassium-transporting ATPase B chain;                                                                                                                                                                     |
| P | P57700 | DR | potassium-transporting ATPase activity                                                                                                                                                                     |
| P | P57787 | CC | Proton-linked monocarboxylate transporter                                                                                                                                                                  |
| P | P57787 | DE | Monocarboxylate transporter 4;                                                                                                                                                                             |
| P | P57787 | DR | secondary active monocarboxylate transmembrane transporter activity                                                                                                                                        |
| P | P57789 | CC | Outward rectifying potassium channel                                                                                                                                                                       |
| P | P57789 | CC | Produces rapidly activating and non-inactivating outward rectifier K <sup>+</sup> currents                                                                                                                 |
| P | P57789 | DE | Outward rectifying potassium channel protein TREK-2;                                                                                                                                                       |
| P | P57789 | DE | Potassium channel subfamily K member 10;                                                                                                                                                                   |
| P | P57789 | DE | TREK-2 K <sup>+</sup> channel subunit;                                                                                                                                                                     |
| P | P57789 | DR | potassium channel activity                                                                                                                                                                                 |

|   |        |    |                                                                                                                                                                                                            |
|---|--------|----|------------------------------------------------------------------------------------------------------------------------------------------------------------------------------------------------------------|
| P | P58229 | CC | Imports glutamate inside the cell while simultaneously exporting to the periplasm the GABA produced by gadA and gadB                                                                                       |
| P | P58229 | CC | Involved in glutamate-dependent acid resistance                                                                                                                                                            |
| P | P58229 | DE | Probable glutamate/gamma-aminobutyrate antiporter;                                                                                                                                                         |
| P | P58244 | CC | Functions as antiport system and exchanges two chloride ions for 1 proton                                                                                                                                  |
| P | P58244 | CC | Proton-coupled chloride transporter                                                                                                                                                                        |
| P | P58244 | DR | voltage-gated chloride channel activity                                                                                                                                                                    |
| P | P58300 | CC | Binds maltotriose much more tightly than maltose.                                                                                                                                                          |
| P | P58300 | DR | maltose transmembrane transporter activity                                                                                                                                                                 |
| P | P58341 | CC | Involved in copper transport (By similarity).                                                                                                                                                              |
| P | P58341 | DE | Copper-transporting ATPase 1;                                                                                                                                                                              |
| P | P58341 | DR | copper-exporting ATPase activity                                                                                                                                                                           |
| P | P58342 | CC | Involved in copper transport (By similarity).                                                                                                                                                              |
| P | P58342 | DE | Copper-transporting ATPase 2;                                                                                                                                                                              |
| P | P58342 | DR | copper-exporting ATPase activity                                                                                                                                                                           |
| P | P58390 | CC | forms a voltage-independent potassium channel activated by intracellular calcium                                                                                                                           |
| P | P58414 | CC | This electroneutral antiporter ejects one cadmium ion while accumulating two protons by an energy-dependent efflux mechanism (By similarity).                                                              |
| P | P58414 | DE | Cadmium efflux ATPase;                                                                                                                                                                                     |
| P | P58414 | DE | Probable cadmium-transporting ATPase;                                                                                                                                                                      |
| P | P58414 | DR | cadmium-exporting ATPase activity                                                                                                                                                                          |
| P | P58529 | CC | The physiological role may be the reduction of the intracellular concentration of toxic sugars or sugar metabolites (By similarity).                                                                       |
| P | P58529 | DE | Probable sugar efflux transporter;                                                                                                                                                                         |
| P | P58530 | CC | The physiological role may be the reduction of the intracellular concentration of toxic sugars or sugar metabolites (By similarity).                                                                       |
| P | P58530 | DE | Probable sugar efflux transporter;                                                                                                                                                                         |
| P | P58531 | CC | The physiological role may be the reduction of the intracellular concentration of toxic sugars or sugar metabolites (By similarity).                                                                       |
| P | P58531 | DE | Probable sugar efflux transporter;                                                                                                                                                                         |
| P | P58655 | CC | part of a binding-protein-dependent transport system for propanate; probably responsible for the translocation of the substrate across the membrane (By similarity)                                        |
| P | P58655 | DE | Phosphate transport system permease protein pstA;                                                                                                                                                          |
| P | P58655 | DR | inorganic phosphate transmembrane transporter activity                                                                                                                                                     |
| P | P58734 | DR | sodium:dicarboxylate symporter activity                                                                                                                                                                    |
| P | P58735 | CC | High affinity uptake of sulfate                                                                                                                                                                            |
| P | P58735 | DE | Sulfate anion transporter 1;                                                                                                                                                                               |
| P | P58735 | DR | secondary active sulfate transmembrane transporter activity                                                                                                                                                |
| P | P59053 | CC | Potassium channel subunit                                                                                                                                                                                  |
| P | P59053 | DE | Potassium voltage-gated channel subfamily G member 3;                                                                                                                                                      |
| P | P59053 | DE | Voltage-gated potassium channel subunit Kv10.1;                                                                                                                                                            |
| P | P59053 | DE | Voltage-gated potassium channel subunit Kv6.3;                                                                                                                                                             |
| P | P59111 | CC | Pore-forming (alpha) subunit of voltage-gated potassium channel                                                                                                                                            |
| P | P59111 | DE | Ether-a-go-go-like potassium channel 3;                                                                                                                                                                    |
| P | P59111 | DE | Potassium voltage-gated channel subfamily H member 8;                                                                                                                                                      |
| P | P59111 | DE | Voltage-gated potassium channel subunit Kv12.1;                                                                                                                                                            |
| P | P59213 | CC | Binding protein for maltose and maltodextrin; involved in its cellular uptake.                                                                                                                             |
| P | P59213 | DE | Maltose/maltodextrin-binding protein;                                                                                                                                                                      |
| P | P59213 | DR | maltose transmembrane transporter activity                                                                                                                                                                 |
| P | P59219 | CC | One of the components of the high-affinity ATP-driven potassium transport (or KDP) system, which catalyzes the hydrolysis of ATP coupled with the exchange of hydrogen and potassium ions (By similarity). |
| P | P59219 | DE | Potassium-binding and translocating subunit B;                                                                                                                                                             |
| P | P59219 | DE | Potassium-translocating ATPase B chain;                                                                                                                                                                    |
| P | P59219 | DE | Potassium-transporting ATPase B chain;                                                                                                                                                                     |
| P | P59219 | DR | potassium-transporting ATPase activity                                                                                                                                                                     |
| P | P59585 | DR | voltage-gated chloride channel activity                                                                                                                                                                    |
| P | P59638 | DE | Voltage-gated ClC-type chloride channel ClcB;                                                                                                                                                              |
| P | P59638 | DR | voltage-gated chloride channel activity                                                                                                                                                                    |
| P | P59639 | CC | Functions as antiport system and exchanges two chloride ions for 1 proton                                                                                                                                  |
| P | P59639 | CC | Proton-coupled chloride transporter                                                                                                                                                                        |
| P | P59639 | DR | voltage-gated chloride channel activity                                                                                                                                                                    |
| P | P59737 | DE | Aromatic amino acid transport protein AroP;                                                                                                                                                                |
| P | P59737 | DE | General aromatic amino acid permease;                                                                                                                                                                      |
| P | P59738 | CC | Part of the ABC transporter complex ModABC involved in molybdenum import                                                                                                                                   |

|   |        |    |                                                                                                                                          |
|---|--------|----|------------------------------------------------------------------------------------------------------------------------------------------|
| P | P59738 | DE | Molybdenum import ATP-binding protein ModC;                                                                                              |
| P | P59738 | DR | molybdenum ion transmembrane transporter activity                                                                                        |
| P | P59784 | CC | This system is involved in glucitol/sorbitol transport (By similarity).                                                                  |
| P | P59784 | DE | Glucitol/sorbitol-specific phosphotransferase enzyme IIA component;                                                                      |
| P | P59784 | DE | PTS system glucitol/sorbitol-specific EIIA component;                                                                                    |
| P | P59950 | CC | Low-affinity inorganic phosphate transport (By similarity).                                                                              |
| P | P59950 | DE | Probable low-affinity inorganic phosphate transporter;                                                                                   |
| P | P59950 | DR | inorganic phosphate transmembrane transporter activity                                                                                   |
| P | P60675 | CC | Mnh complex is a Na <sup>+</sup> /H <sup>+</sup> antiporter involved in Na <sup>+</sup> excretion (By similarity).                       |
| P | P60675 | DE | Na <sup>+</sup> /H <sup>+</sup> antiporter subunit A1;                                                                                   |
| P | P60677 | CC | Mnh complex is a Na <sup>+</sup> /H <sup>+</sup> antiporter involved in Na <sup>+</sup> excretion (By similarity).                       |
| P | P60677 | DE | Na <sup>+</sup> /H <sup>+</sup> antiporter subunit B1;                                                                                   |
| P | P60678 | CC | Does not transport K <sup>+</sup> , Ca <sup>2+</sup> or Mg <sup>2+</sup> .                                                               |
| P | P60678 | CC | Mnh complex is a Na <sup>+</sup> Li <sup>+</sup> /H <sup>+</sup> antiporter involved in Na <sup>+</sup> and/or Li <sup>+</sup> excretion |
| P | P60678 | CC | Mnh complex is a Na <sup>+</sup> Li <sup>+</sup> /H <sup>+</sup> antiporter involved in Na <sup>+</sup> and/or Li <sup>+</sup> excretion |
| P | P60678 | CC | Na <sup>+</sup> /H <sup>+</sup> antiport consumes a transmembrane electrical potential, and is thus inferred to be electrogenic          |
| P | P60678 | CC | Na <sup>+</sup> /H <sup>+</sup> antiport consumes a transmembrane electrical potential, and is thus inferred to be electrogenic          |
| P | P60678 | DE | Na <sup>+</sup> /H <sup>+</sup> antiporter subunit B1;                                                                                   |
| P | P60678 | DE | Na <sup>+</sup> /H <sup>+</sup> antiporter subunit B1;                                                                                   |
| P | P60681 | CC | Mnh complex is a Na <sup>+</sup> /H <sup>+</sup> antiporter involved in Na <sup>+</sup> excretion (By similarity).                       |
| P | P60681 | DE | Na <sup>+</sup> /H <sup>+</sup> antiporter subunit C1;                                                                                   |
| P | P60682 | CC | Does not transport K <sup>+</sup> , Ca <sup>2+</sup> or Mg <sup>2+</sup> .                                                               |
| P | P60682 | CC | Mnh complex is a Na <sup>+</sup> Li <sup>+</sup> /H <sup>+</sup> antiporter involved in Na <sup>+</sup> and/or Li <sup>+</sup> excretion |
| P | P60682 | CC | Mnh complex is a Na <sup>+</sup> Li <sup>+</sup> /H <sup>+</sup> antiporter involved in Na <sup>+</sup> and/or Li <sup>+</sup> excretion |
| P | P60682 | CC | Na <sup>+</sup> /H <sup>+</sup> antiport consumes a transmembrane electrical potential, and is thus inferred to be electrogenic          |
| P | P60682 | CC | Na <sup>+</sup> /H <sup>+</sup> antiport consumes a transmembrane electrical potential, and is thus inferred to be electrogenic          |
| P | P60682 | DE | Na <sup>+</sup> /H <sup>+</sup> antiporter subunit C1;                                                                                   |
| P | P60682 | DE | Na <sup>+</sup> /H <sup>+</sup> antiporter subunit C1;                                                                                   |
| P | P60685 | CC | Mnh complex is a Na <sup>+</sup> /H <sup>+</sup> antiporter involved in Na <sup>+</sup> excretion (By similarity).                       |
| P | P60685 | DE | Na <sup>+</sup> /H <sup>+</sup> antiporter subunit D1;                                                                                   |
| P | P60686 | CC | Does not transport K <sup>+</sup> , Ca <sup>2+</sup> or Mg <sup>2+</sup> .                                                               |
| P | P60686 | CC | Mnh complex is a Na <sup>+</sup> Li <sup>+</sup> /H <sup>+</sup> antiporter involved in Na <sup>+</sup> and/or Li <sup>+</sup> excretion |
| P | P60686 | CC | Mnh complex is a Na <sup>+</sup> Li <sup>+</sup> /H <sup>+</sup> antiporter involved in Na <sup>+</sup> and/or Li <sup>+</sup> excretion |
| P | P60686 | CC | Na <sup>+</sup> /H <sup>+</sup> antiport consumes a transmembrane electrical potential, and is thus inferred to be electrogenic          |
| P | P60686 | CC | Na <sup>+</sup> /H <sup>+</sup> antiport consumes a transmembrane electrical potential, and is thus inferred to be electrogenic          |
| P | P60686 | DE | Na <sup>+</sup> /H <sup>+</sup> antiporter subunit D1;                                                                                   |
| P | P60686 | DE | Na <sup>+</sup> /H <sup>+</sup> antiporter subunit D1;                                                                                   |
| P | P60686 | DR | potassium:hydrogen antiporter activity                                                                                                   |
| P | P60689 | CC | Mnh complex is a Na <sup>+</sup> /H <sup>+</sup> antiporter involved in Na <sup>+</sup> excretion (By similarity).                       |
| P | P60689 | DE | Na <sup>+</sup> /H <sup>+</sup> antiporter subunit E1;                                                                                   |
| P | P60690 | CC | Does not transport K <sup>+</sup> , Ca <sup>2+</sup> or Mg <sup>2+</sup> .                                                               |
| P | P60690 | CC | Mnh complex is a Na <sup>+</sup> Li <sup>+</sup> /H <sup>+</sup> antiporter involved in Na <sup>+</sup> and/or Li <sup>+</sup> excretion |
| P | P60690 | CC | Mnh complex is a Na <sup>+</sup> Li <sup>+</sup> /H <sup>+</sup> antiporter involved in Na <sup>+</sup> and/or Li <sup>+</sup> excretion |
| P | P60690 | CC | Na <sup>+</sup> /H <sup>+</sup> antiport consumes a transmembrane electrical potential, and is thus inferred to be electrogenic          |
| P | P60690 | CC | Na <sup>+</sup> /H <sup>+</sup> antiport consumes a transmembrane electrical potential, and is thus inferred to be electrogenic          |
| P | P60690 | DE | Na <sup>+</sup> /H <sup>+</sup> antiporter subunit E1;                                                                                   |
| P | P60690 | DE | Na <sup>+</sup> /H <sup>+</sup> antiporter subunit E1;                                                                                   |
| P | P60693 | CC | Mnh complex is a Na <sup>+</sup> /H <sup>+</sup> antiporter involved in Na <sup>+</sup> excretion (By similarity).                       |
| P | P60693 | DE | Na <sup>+</sup> /H <sup>+</sup> antiporter subunit F1;                                                                                   |
| P | P60694 | CC | Does not transport K <sup>+</sup> , Ca <sup>2+</sup> or Mg <sup>2+</sup> .                                                               |
| P | P60694 | CC | Mnh complex is a Na <sup>+</sup> Li <sup>+</sup> /H <sup>+</sup> antiporter involved in Na <sup>+</sup> and/or Li <sup>+</sup> excretion |
| P | P60694 | CC | Mnh complex is a Na <sup>+</sup> Li <sup>+</sup> /H <sup>+</sup> antiporter involved in Na <sup>+</sup> and/or Li <sup>+</sup> excretion |
| P | P60694 | CC | Na <sup>+</sup> /H <sup>+</sup> antiport consumes a transmembrane electrical potential, and is thus inferred to be electrogenic          |
| P | P60694 | CC | Na <sup>+</sup> /H <sup>+</sup> antiport consumes a transmembrane electrical potential, and is thus inferred to be electrogenic          |
| P | P60694 | DE | Na <sup>+</sup> /H <sup>+</sup> antiporter subunit F1;                                                                                   |



|   |        |    |                                                                                                                                                                                                                                            |
|---|--------|----|--------------------------------------------------------------------------------------------------------------------------------------------------------------------------------------------------------------------------------------------|
| P | P60694 | DE | Na <sup>+</sup> /H <sup>+</sup> antiporter subunit F1;                                                                                                                                                                                     |
| P | P60697 | CC | Mnh complex is a Na <sup>+</sup> /H <sup>+</sup> antiporter involved in Na <sup>+</sup> excretion (By similarity).                                                                                                                         |
| P | P60697 | DE | Na <sup>+</sup> /H <sup>+</sup> antiporter subunit G1;                                                                                                                                                                                     |
| P | P60698 | CC | Does not transport K <sup>+</sup> , Ca <sup>2+</sup> or Mg <sup>2+</sup> .                                                                                                                                                                 |
| P | P60698 | CC | Mnh complex is a Na <sup>+</sup> /Li <sup>+</sup> /H <sup>+</sup> antiporter involved in Na <sup>+</sup> and/or Li <sup>+</sup> excretion                                                                                                  |
| P | P60698 | CC | Mnh complex is a Na <sup>+</sup> /Li <sup>+</sup> /H <sup>+</sup> antiporter involved in Na <sup>+</sup> and/or Li <sup>+</sup> excretion                                                                                                  |
| P | P60698 | CC | Na <sup>+</sup> /H <sup>+</sup> antiport consumes a transmembrane electrical potential, and is thus inferred to be electrogenic                                                                                                            |
| P | P60698 | CC | Na <sup>+</sup> /H <sup>+</sup> antiport consumes a transmembrane electrical potential, and is thus inferred to be electrogenic                                                                                                            |
| P | P60698 | DE | Na <sup>+</sup> /H <sup>+</sup> antiporter subunit G1;                                                                                                                                                                                     |
| P | P60698 | DE | Na <sup>+</sup> /H <sup>+</sup> antiporter subunit G1;                                                                                                                                                                                     |
| P | P60857 | CC | This system is involved in glucose transport (By similarity).                                                                                                                                                                              |
| P | P60857 | DE | Glucose-specific phosphotransferase enzyme IIA component;                                                                                                                                                                                  |
| P | P60857 | DE | PTS system glucose-specific EIIA component;                                                                                                                                                                                                |
| P | P60925 | CC | Channel that permits osmotically driven movement of water in both directions                                                                                                                                                               |
| P | P60925 | CC | It mediates rapid entry or exit of water in response to abrupt changes in osmolarity (By similarity).                                                                                                                                      |
| P | P60944 | CC | Involved in the uptake of glucose (By similarity).                                                                                                                                                                                         |
| P | P60944 | DE | Probable glucose uptake protein glcU;                                                                                                                                                                                                      |
| P | P60949 | CC | Could be involved in the uptake of ribose (By similarity).                                                                                                                                                                                 |
| P | P60949 | DE | Putative ribose uptake protein rbsU;                                                                                                                                                                                                       |
| P | P61377 | CC | Part of the ABC transporter complex CcmAB involved in the biogenesis of c-type cytochromes; once thought to export heme, this seems not to be the case, but its exact role is uncertain                                                    |
| P | P61377 | DE | Heme exporter protein A;                                                                                                                                                                                                                   |
| P | P61377 | DR | heme-transporting ATPase activity                                                                                                                                                                                                          |
| P | P61378 | CC | Part of the ABC transporter complex CcmAB involved in the biogenesis of c-type cytochromes; once thought to export heme, this seems not to be the case, but its exact role is uncertain                                                    |
| P | P61378 | DE | Heme exporter protein A 2;                                                                                                                                                                                                                 |
| P | P61378 | DR | heme-transporting ATPase activity                                                                                                                                                                                                          |
| P | P61481 | DE | Lipoprotein-releasing system ATP-binding protein LolD;                                                                                                                                                                                     |
| P | P61481 | DR | lipoprotein transporter activity                                                                                                                                                                                                           |
| P | P61482 | DE | Lipoprotein-releasing system ATP-binding protein LolD;                                                                                                                                                                                     |
| P | P61482 | DR | lipoprotein transporter activity                                                                                                                                                                                                           |
| P | P61837 | CC | Water channel required to facilitate the transport of water across cell membrane                                                                                                                                                           |
| P | P61837 | DR | water channel activity                                                                                                                                                                                                                     |
| P | P62812 | CC | GABA, the major inhibitory neurotransmitter in the vertebrate brain, mediates neuronal inhibition by binding to the GABA/benzodiazepine receptor and opening an integral chloride channel.                                                 |
| P | P62812 | DR | chloride channel activity                                                                                                                                                                                                                  |
| P | P63080 | CC | GABA, the major inhibitory neurotransmitter in the vertebrate brain, mediates neuronal inhibition by binding to the GABA/benzodiazepine receptor and opening an integral chloride channel (By similarity).                                 |
| P | P63080 | DR | chloride channel activity                                                                                                                                                                                                                  |
| P | P63137 | CC | GABA, the major inhibitory neurotransmitter in the vertebrate brain, mediates neuronal inhibition by binding to the GABA/benzodiazepine receptor and opening an integral chloride channel.                                                 |
| P | P63137 | DR | chloride channel activity                                                                                                                                                                                                                  |
| P | P63141 | CC | Assuming opened or closed conformations in response to the voltage difference across the membrane, the protein forms a potassium-selective channel through which potassium ions may pass in accordance with their electrochemical gradient |
| P | P63141 | CC | mediates the voltage-dependent potassium ion permeability of excitable membrane                                                                                                                                                            |
| P | P63141 | DE | Potassium voltage-gated channel subfamily A member 2;                                                                                                                                                                                      |
| P | P63141 | DE | Voltage-gated potassium channel subunit Kv1.2;                                                                                                                                                                                             |
| P | P63250 | CC | Inward rectifier potassium channels are characterized by a greater tendency to allow potassium to flow into the cell rather than out of it                                                                                                 |
| P | P63250 | CC | Their voltage dependence is regulated by the concentration of extracellular potassium; as external potassium is raised, the voltage range of the channel opening shifts to more positive voltages                                          |
| P | P63250 | CC | This potassium channel is controlled by G proteins                                                                                                                                                                                         |
| P | P63250 | DE | G protein-activated inward rectifier potassium channel 1;                                                                                                                                                                                  |
| P | P63250 | DE | Inward rectifier K <sup>+</sup> channel Kir3.1;                                                                                                                                                                                            |
| P | P63250 | DE | Potassium channel, inwardly rectifying subfamily J member 3;                                                                                                                                                                               |

|   |        |    |                                                                                                                                                                                                   |
|---|--------|----|---------------------------------------------------------------------------------------------------------------------------------------------------------------------------------------------------|
| P | P63250 | DR | G-protein activated inward rectifier potassium channel activity                                                                                                                                   |
| P | P63252 | CC | Inward rectifier potassium channels are characterized by a greater tendency to allow potassium to flow into the cell rather than out of it                                                        |
| P | P63252 | CC | Their voltage dependence is regulated by the concentration of extracellular potassium; as external potassium is raised, the voltage range of the channel opening shifts to more positive voltages |
| P | P63252 | DE | Cardiac inward rectifier potassium channel;                                                                                                                                                       |
| P | P63252 | DE | Inward rectifier K <sup>+</sup> channel Kir2.1;                                                                                                                                                   |
| P | P63252 | DE | Inward rectifier potassium channel 2;                                                                                                                                                             |
| P | P63252 | DE | Potassium channel, inwardly rectifying subfamily J member 2;                                                                                                                                      |
| P | P63252 | DR | inward rectifier potassium channel activity                                                                                                                                                       |
| P | P63351 | CC | Part of the ABC transporter complex BtuCDF involved in vitamin B12 import                                                                                                                         |
| P | P63351 | DE | Vitamin B12 import ATP-binding protein BtuD;                                                                                                                                                      |
| P | P63351 | DE | Vitamin B12-transporting ATPase;                                                                                                                                                                  |
| P | P63352 | CC | Part of the ABC transporter complex BtuCDF involved in vitamin B12 import                                                                                                                         |
| P | P63352 | DE | Vitamin B12 import ATP-binding protein BtuD;                                                                                                                                                      |
| P | P63352 | DE | Vitamin B12-transporting ATPase;                                                                                                                                                                  |
| P | P63353 | CC | Part of the ABC transporter complex CysAW 1F involved in sulfate/thiosulfate import                                                                                                               |
| P | P63353 | DE | Sulfate-transporting ATPase;                                                                                                                                                                      |
| P | P63353 | DE | Sulfate/thiosulfate import ATP-binding protein CysA;                                                                                                                                              |
| P | P63353 | DR | sulfate transmembrane-transporting ATPase activity                                                                                                                                                |
| P | P63354 | CC | Part of the ABC transporter complex CysAW 1F involved in sulfate/thiosulfate import                                                                                                               |
| P | P63354 | DE | Sulfate-transporting ATPase;                                                                                                                                                                      |
| P | P63354 | DE | Sulfate/thiosulfate import ATP-binding protein CysA;                                                                                                                                              |
| P | P63354 | DR | sulfate transmembrane-transporting ATPase activity                                                                                                                                                |
| P | P63356 | CC | Part of the ABC transporter complex MetNIQ involved in methionine import                                                                                                                          |
| P | P63356 | DE | Methionine import ATP-binding protein MetN;                                                                                                                                                       |
| P | P63356 | DR | D-methionine transmembrane transporter activity                                                                                                                                                   |
| P | P63361 | CC | Part of the ABC transporter complex PstSACB involved in phosphate import                                                                                                                          |
| P | P63361 | DE | ABC phosphate transporter;                                                                                                                                                                        |
| P | P63361 | DE | Phosphate import ATP-binding protein PstB;                                                                                                                                                        |
| P | P63361 | DE | Phosphate-transporting ATPase;                                                                                                                                                                    |
| P | P63361 | DR | inorganic phosphate transmembrane transporter activity                                                                                                                                            |
| P | P63361 | DR | phosphate transmembrane-transporting ATPase activity                                                                                                                                              |
| P | P63362 | CC | Part of the ABC transporter complex PstSACB involved in phosphate import                                                                                                                          |
| P | P63362 | DE | ABC phosphate transporter;                                                                                                                                                                        |
| P | P63362 | DE | Phosphate import ATP-binding protein PstB;                                                                                                                                                        |
| P | P63362 | DE | Phosphate-transporting ATPase;                                                                                                                                                                    |
| P | P63362 | DR | inorganic phosphate transmembrane transporter activity                                                                                                                                            |
| P | P63362 | DR | phosphate transmembrane-transporting ATPase activity                                                                                                                                              |
| P | P63363 | CC | Part of the ABC transporter complex PstSACB involved in phosphate import                                                                                                                          |
| P | P63363 | DE | ABC phosphate transporter 1;                                                                                                                                                                      |
| P | P63363 | DE | Phosphate import ATP-binding protein PstB 1;                                                                                                                                                      |
| P | P63363 | DE | Phosphate-transporting ATPase 1;                                                                                                                                                                  |
| P | P63363 | DR | inorganic phosphate transmembrane transporter activity                                                                                                                                            |
| P | P63363 | DR | phosphate transmembrane-transporting ATPase activity                                                                                                                                              |
| P | P63364 | CC | Part of the ABC transporter complex PstSACB involved in phosphate import                                                                                                                          |
| P | P63364 | DE | ABC phosphate transporter 1;                                                                                                                                                                      |
| P | P63364 | DE | Phosphate import ATP-binding protein PstB 1;                                                                                                                                                      |
| P | P63364 | DE | Phosphate-transporting ATPase 1;                                                                                                                                                                  |
| P | P63364 | DR | inorganic phosphate transmembrane transporter activity                                                                                                                                            |
| P | P63364 | DR | phosphate transmembrane-transporting ATPase activity                                                                                                                                              |
| P | P63365 | CC | Part of the ABC transporter complex PstSACB involved in phosphate import                                                                                                                          |
| P | P63365 | DE | ABC phosphate transporter;                                                                                                                                                                        |
| P | P63365 | DE | Phosphate import ATP-binding protein PstB;                                                                                                                                                        |
| P | P63365 | DE | Phosphate-transporting ATPase;                                                                                                                                                                    |
| P | P63365 | DR | inorganic phosphate transmembrane transporter activity                                                                                                                                            |
| P | P63365 | DR | phosphate transmembrane-transporting ATPase activity                                                                                                                                              |
| P | P63366 | CC | Part of the ABC transporter complex PstSACB involved in phosphate import                                                                                                                          |
| P | P63366 | DE | ABC phosphate transporter;                                                                                                                                                                        |
| P | P63366 | DE | Phosphate import ATP-binding protein PstB;                                                                                                                                                        |
| P | P63366 | DE | Phosphate-transporting ATPase;                                                                                                                                                                    |
| P | P63366 | DR | inorganic phosphate transmembrane transporter activity                                                                                                                                            |
| P | P63366 | DR | phosphate transmembrane-transporting ATPase activity                                                                                                                                              |
| P | P63367 | CC | Part of the ABC transporter complex PstSACB involved in phosphate import                                                                                                                          |

|   |        |    |                                                                                                                                                                                                            |
|---|--------|----|------------------------------------------------------------------------------------------------------------------------------------------------------------------------------------------------------------|
| P | P63367 | DE | ABC phosphate transporter 1;                                                                                                                                                                               |
| P | P63367 | DE | Phosphate import ATP-binding protein PstB 1;                                                                                                                                                               |
| P | P63367 | DE | Phosphate-transporting ATPase 1;                                                                                                                                                                           |
| P | P63367 | DR | inorganic phosphate transmembrane transporter activity                                                                                                                                                     |
| P | P63367 | DR | phosphate transmembrane-transporting ATPase activity                                                                                                                                                       |
| P | P63368 | CC | Part of the ABC transporter complex PstSACB involved in phosphate import                                                                                                                                   |
| P | P63368 | DE | ABC phosphate transporter 1;                                                                                                                                                                               |
| P | P63368 | DE | Phosphate import ATP-binding protein PstB 1;                                                                                                                                                               |
| P | P63368 | DE | Phosphate-transporting ATPase 1;                                                                                                                                                                           |
| P | P63368 | DR | inorganic phosphate transmembrane transporter activity                                                                                                                                                     |
| P | P63368 | DR | phosphate transmembrane-transporting ATPase activity                                                                                                                                                       |
| P | P63369 | CC | Part of the ABC transporter complex PstSACB involved in phosphate import                                                                                                                                   |
| P | P63369 | DE | ABC phosphate transporter 2;                                                                                                                                                                               |
| P | P63369 | DE | Phosphate import ATP-binding protein PstB 2;                                                                                                                                                               |
| P | P63369 | DE | Phosphate-transporting ATPase 2;                                                                                                                                                                           |
| P | P63369 | DR | inorganic phosphate transmembrane transporter activity                                                                                                                                                     |
| P | P63369 | DR | phosphate transmembrane-transporting ATPase activity                                                                                                                                                       |
| P | P63370 | CC | Part of the ABC transporter complex PstSACB involved in phosphate import                                                                                                                                   |
| P | P63370 | DE | ABC phosphate transporter 2;                                                                                                                                                                               |
| P | P63370 | DE | Phosphate import ATP-binding protein PstB 2;                                                                                                                                                               |
| P | P63370 | DE | Phosphate-transporting ATPase 2;                                                                                                                                                                           |
| P | P63370 | DR | inorganic phosphate transmembrane transporter activity                                                                                                                                                     |
| P | P63370 | DR | phosphate transmembrane-transporting ATPase activity                                                                                                                                                       |
| P | P63371 | CC | Part of the ABC transporter complex PstSACB involved in phosphate import                                                                                                                                   |
| P | P63371 | DE | ABC phosphate transporter 3;                                                                                                                                                                               |
| P | P63371 | DE | Phosphate import ATP-binding protein PstB 3;                                                                                                                                                               |
| P | P63371 | DE | Phosphate-transporting ATPase 3;                                                                                                                                                                           |
| P | P63371 | DR | inorganic phosphate transmembrane transporter activity                                                                                                                                                     |
| P | P63371 | DR | phosphate transmembrane-transporting ATPase activity                                                                                                                                                       |
| P | P63372 | CC | Part of the ABC transporter complex PstSACB involved in phosphate import                                                                                                                                   |
| P | P63372 | DE | ABC phosphate transporter 3;                                                                                                                                                                               |
| P | P63372 | DE | Phosphate import ATP-binding protein PstB 3;                                                                                                                                                               |
| P | P63372 | DE | Phosphate-transporting ATPase 3;                                                                                                                                                                           |
| P | P63372 | DR | inorganic phosphate transmembrane transporter activity                                                                                                                                                     |
| P | P63372 | DR | phosphate transmembrane-transporting ATPase activity                                                                                                                                                       |
| P | P63373 | CC | Part of the ABC transporter complex PstSACB involved in phosphate import                                                                                                                                   |
| P | P63373 | DE | ABC phosphate transporter 1;                                                                                                                                                                               |
| P | P63373 | DE | Phosphate import ATP-binding protein PstB 1;                                                                                                                                                               |
| P | P63373 | DE | Phosphate-transporting ATPase 1;                                                                                                                                                                           |
| P | P63373 | DR | inorganic phosphate transmembrane transporter activity                                                                                                                                                     |
| P | P63373 | DR | phosphate transmembrane-transporting ATPase activity                                                                                                                                                       |
| P | P63375 | CC | Part of the ABC transporter complex PstSACB involved in phosphate import                                                                                                                                   |
| P | P63375 | DE | ABC phosphate transporter 1;                                                                                                                                                                               |
| P | P63375 | DE | Phosphate import ATP-binding protein PstB 1;                                                                                                                                                               |
| P | P63375 | DE | Phosphate-transporting ATPase 1;                                                                                                                                                                           |
| P | P63375 | DR | inorganic phosphate transmembrane transporter activity                                                                                                                                                     |
| P | P63375 | DR | phosphate transmembrane-transporting ATPase activity                                                                                                                                                       |
| P | P63378 | CC | Part of the ABC transporter complex PstSACB involved in phosphate import                                                                                                                                   |
| P | P63378 | DE | ABC phosphate transporter 2;                                                                                                                                                                               |
| P | P63378 | DE | Phosphate import ATP-binding protein PstB 2;                                                                                                                                                               |
| P | P63378 | DE | Phosphate-transporting ATPase 2;                                                                                                                                                                           |
| P | P63378 | DR | inorganic phosphate transmembrane transporter activity                                                                                                                                                     |
| P | P63378 | DR | phosphate transmembrane-transporting ATPase activity                                                                                                                                                       |
| P | P63620 | CC | Thought to form the channel of an arsenite pump.                                                                                                                                                           |
| P | P63620 | DR | arsenite transmembrane transporter activity                                                                                                                                                                |
| P | P63681 | CC | One of the components of the high-affinity ATP-driven potassium transport (or KDP) system, which catalyzes the hydrolysis of ATP coupled with the exchange of hydrogen and potassium ions (By similarity). |
| P | P63681 | DE | Potassium-binding and translocating subunit B;                                                                                                                                                             |
| P | P63681 | DE | Potassium-translocating ATPase B chain;                                                                                                                                                                    |
| P | P63681 | DE | Potassium-transporting ATPase B chain;                                                                                                                                                                     |
| P | P63681 | DR | potassium-transporting ATPase activity                                                                                                                                                                     |
| P | P63682 | CC | One of the components of the high-affinity ATP-driven potassium transport (or KDP) system, which catalyzes the hydrolysis of ATP coupled with the exchange of hydrogen and potassium ions (By similarity). |

|   |        |    |                                                                                                                                                                                                            |
|---|--------|----|------------------------------------------------------------------------------------------------------------------------------------------------------------------------------------------------------------|
| P | P63682 | DE | Potassium-binding and translocating subunit B;                                                                                                                                                             |
| P | P63682 | DE | Potassium-translocating ATPase B chain;                                                                                                                                                                    |
| P | P63682 | DE | Potassium-transporting ATPase B chain;                                                                                                                                                                     |
| P | P63682 | DR | potassium-transporting ATPase activity                                                                                                                                                                     |
| P | P63684 | CC | One of the components of the high-affinity ATP-driven potassium transport (or KDP) system, which catalyzes the hydrolysis of ATP coupled with the exchange of hydrogen and potassium ions (By similarity). |
| P | P63684 | DE | Potassium-binding and translocating subunit B 2;                                                                                                                                                           |
| P | P63684 | DE | Potassium-translocating ATPase B chain 2;                                                                                                                                                                  |
| P | P63684 | DE | Potassium-transporting ATPase B chain 2;                                                                                                                                                                   |
| P | P63684 | DR | potassium-transporting ATPase activity                                                                                                                                                                     |
| P | P65209 | CC | One of the components of the high-affinity ATP-driven potassium transport (or KDP) system, which catalyzes the hydrolysis of ATP coupled with the exchange of hydrogen and potassium ions (By similarity). |
| P | P65209 | DE | Potassium-binding and translocating subunit A;                                                                                                                                                             |
| P | P65209 | DE | Potassium-translocating ATPase A chain;                                                                                                                                                                    |
| P | P65209 | DE | Potassium-transporting ATPase A chain;                                                                                                                                                                     |
| P | P65209 | DR | potassium-transporting ATPase activity                                                                                                                                                                     |
| P | P65210 | CC | One of the components of the high-affinity ATP-driven potassium transport (or KDP) system, which catalyzes the hydrolysis of ATP coupled with the exchange of hydrogen and potassium ions (By similarity). |
| P | P65210 | DE | Potassium-binding and translocating subunit A;                                                                                                                                                             |
| P | P65210 | DE | Potassium-translocating ATPase A chain;                                                                                                                                                                    |
| P | P65210 | DE | Potassium-transporting ATPase A chain;                                                                                                                                                                     |
| P | P65210 | DR | potassium-transporting ATPase activity                                                                                                                                                                     |
| P | P65211 | CC | One of the components of the high-affinity ATP-driven potassium transport (or KDP) system, which catalyzes the hydrolysis of ATP coupled with the exchange of hydrogen and potassium ions                  |
| P | P65211 | DE | Potassium-binding and translocating subunit C;                                                                                                                                                             |
| P | P65211 | DE | Potassium-translocating ATPase C chain;                                                                                                                                                                    |
| P | P65211 | DE | Potassium-transporting ATPase C chain;                                                                                                                                                                     |
| P | P65211 | DR | potassium-transporting ATPase activity                                                                                                                                                                     |
| P | P65212 | CC | One of the components of the high-affinity ATP-driven potassium transport (or KDP) system, which catalyzes the hydrolysis of ATP coupled with the exchange of hydrogen and potassium ions                  |
| P | P65212 | DE | Potassium-binding and translocating subunit C;                                                                                                                                                             |
| P | P65212 | DE | Potassium-translocating ATPase C chain;                                                                                                                                                                    |
| P | P65212 | DE | Potassium-transporting ATPase C chain;                                                                                                                                                                     |
| P | P65212 | DR | potassium-transporting ATPase activity                                                                                                                                                                     |
| P | P65214 | CC | One of the components of the high-affinity ATP-driven potassium transport (or KDP) system, which catalyzes the hydrolysis of ATP coupled with the exchange of hydrogen and potassium ions                  |
| P | P65214 | DE | Potassium-binding and translocating subunit C 1;                                                                                                                                                           |
| P | P65214 | DE | Potassium-translocating ATPase C chain 1;                                                                                                                                                                  |
| P | P65214 | DE | Potassium-transporting ATPase C chain 1;                                                                                                                                                                   |
| P | P65214 | DR | potassium-transporting ATPase activity                                                                                                                                                                     |
| P | P65254 | CC | Transports L-lactate across the membrane                                                                                                                                                                   |
| P | P65254 | DE | L-lactate permease;                                                                                                                                                                                        |
| P | P65254 | DR | lactate transmembrane transporter activity                                                                                                                                                                 |
| P | P65544 | CC | H+-stimulated, highly selective, manganese uptake system (By similarity).                                                                                                                                  |
| P | P65544 | DE | Probable manganese transport protein mntH;                                                                                                                                                                 |
| P | P65545 | CC | H+-stimulated, highly selective, manganese uptake system (By similarity).                                                                                                                                  |
| P | P65545 | DE | Probable manganese transport protein mntH;                                                                                                                                                                 |
| P | P67730 | DR | voltage-gated chloride channel activity                                                                                                                                                                    |
| P | P68183 | CC | Part of the binding-protein-dependent transport system for maltose; probably responsible for the translocation of the substrate across the membrane.                                                       |
| P | P68183 | DE | Maltose transport system permease protein malG;                                                                                                                                                            |
| P | P68183 | DR | maltose-transporting ATPase activity                                                                                                                                                                       |
| P | P68185 | CC | Part of the binding-protein-dependent transport system for maltose; probably responsible for the translocation of the substrate across the membrane.                                                       |
| P | P68185 | DE | Maltose transport system permease protein malG;                                                                                                                                                            |
| P | P68186 | CC | Part of the binding-protein-dependent transport system for maltose; probably responsible for the translocation of the substrate across the membrane.                                                       |
| P | P68186 | DE | Maltose transport system permease protein malG;                                                                                                                                                            |
| P | P68187 | CC | Part of the ABC transporter complex maltFGK involved in maltose/maltodextrin transport                                                                                                                     |

|   |        |    |                                                                             |
|---|--------|----|-----------------------------------------------------------------------------|
| P | P68187 | DE | Maltose/maltodextrin import ATP-binding protein MalK;                       |
| P | P68187 | DR | maltose-transporting ATPase activity                                        |
| P | P68188 | CC | part of the ABC transporter complex involved in maltose/maltodextrin import |
| P | P68188 | DE | Maltose/maltodextrin import ATP-binding protein MalK;                       |
| P | P68188 | DR | maltose-transporting ATPase activity                                        |
| P | P69783 | CC | This system is involved in glucose transport.                               |
| P | P69783 | DE | Glucose-specific phosphotransferase enzyme IIA component;                   |
| P | P69783 | DE | PTS system glucose-specific EIIA component;                                 |
| P | P69785 | CC | This system is involved in glucose transport (By similarity).               |
| P | P69785 | DE | Glucose-specific phosphotransferase enzyme IIA component;                   |
| P | P69785 | DE | PTS system glucose-specific EIIA component;                                 |
| P | P69786 | CC | This system is involved in glucose transport                                |
| P | P69786 | DE | Glucose permease IIC component;                                             |
| P | P69786 | DE | Glucose-specific phosphotransferase enzyme IIB component;                   |
| P | P69786 | DE | PTS system glucose-specific EIIB component;                                 |
| P | P69786 | DE | PTS system glucose-specific EIIC component;                                 |
| P | P69786 | DE | PTS system glucose-specific EIICB component;                                |
| P | P69786 | DR | glucose transmembrane transporter activity                                  |
| P | P69788 | CC | This system is involved in glucose transport                                |
| P | P69788 | DE | Glucose permease IIC component;                                             |
| P | P69788 | DE | Glucose-specific phosphotransferase enzyme IIB component;                   |
| P | P69788 | DE | PTS system glucose-specific EIIB component;                                 |
| P | P69788 | DE | PTS system glucose-specific EIIC component;                                 |
| P | P69788 | DE | PTS system glucose-specific EIICB component;                                |
| P | P69788 | DR | glucose transmembrane transporter activity                                  |
| P | P69797 | CC | This system is involved in mannose transport.                               |
| P | P69797 | DE | Mannose-specific phosphotransferase enzyme IIA component;                   |
| P | P69797 | DE | Mannose-specific phosphotransferase enzyme IIB component;                   |
| P | P69797 | DE | PTS system mannose-specific EIIA component;                                 |
| P | P69797 | DE | PTS system mannose-specific EIAB component;                                 |
| P | P69797 | DE | PTS system mannose-specific EIIB component;                                 |
| P | P69799 | CC | This system is involved in mannose transport (By similarity).               |
| P | P69799 | DE | Mannose-specific phosphotransferase enzyme IIA component;                   |
| P | P69799 | DE | Mannose-specific phosphotransferase enzyme IIB component;                   |
| P | P69799 | DE | PTS system mannose-specific EIIA component;                                 |
| P | P69799 | DE | PTS system mannose-specific EIAB component;                                 |
| P | P69799 | DE | PTS system mannose-specific EIIB component;                                 |
| P | P69800 | CC | This system is involved in mannose transport (By similarity).               |
| P | P69800 | DE | Mannose-specific phosphotransferase enzyme IIA component;                   |
| P | P69800 | DE | Mannose-specific phosphotransferase enzyme IIB component;                   |
| P | P69800 | DE | PTS system mannose-specific EIIA component;                                 |
| P | P69800 | DE | PTS system mannose-specific EIAB component;                                 |
| P | P69800 | DE | PTS system mannose-specific EIIB component;                                 |
| P | P69801 | CC | This system is involved in mannose transport.                               |
| P | P69801 | DE | Mannose permease IIC component;                                             |
| P | P69801 | DE | PTS system mannose-specific EIIC component;                                 |
| P | P69803 | CC | This system is involved in mannose transport (By similarity).               |
| P | P69803 | DE | Mannose permease IIC component;                                             |
| P | P69803 | DE | PTS system mannose-specific EIIC component;                                 |
| P | P69804 | CC | This system is involved in mannose transport (By similarity).               |
| P | P69804 | DE | Mannose permease IIC component;                                             |
| P | P69804 | DE | PTS system mannose-specific EIIC component;                                 |
| P | P69805 | CC | This system is involved in mannose transport.                               |
| P | P69805 | DE | Mannose permease IID component;                                             |
| P | P69805 | DE | PTS system mannose-specific EIID component;                                 |
| P | P69807 | CC | This system is involved in mannose transport (By similarity).               |
| P | P69807 | DE | Mannose permease IID component;                                             |
| P | P69807 | DE | PTS system mannose-specific EIID component;                                 |
| P | P69812 | CC | This system is involved in fructose transport (By similarity).              |
| P | P69812 | DE | Fructose-specific phosphotransferase enzyme IIA component;                  |
| P | P69812 | DE | PTS system fructose-specific EIIA component;                                |
| P | P69814 | CC | This system is involved in galactitol transport (By similarity).            |
| P | P69814 | DE | Galactitol-specific phosphotransferase enzyme IIA component;                |
| P | P69814 | DE | PTS system galactitol-specific EIIA component;                              |
| P | P69825 | CC | This system is involved in mannitol transport (By similarity).              |

|   |        |    |                                                                                                                    |
|---|--------|----|--------------------------------------------------------------------------------------------------------------------|
| P | P69825 | DE | Mannitol-specific cryptic phosphotransferase enzyme IIA component;                                                 |
| P | P69825 | DE | PTS system mannitol-specific EIIA component;                                                                       |
| P | P69827 | CC | This system is involved in mannitol transport (By similarity).                                                     |
| P | P69827 | DE | Mannitol permease IIC component;                                                                                   |
| P | P69827 | DE | Mannitol-specific phosphotransferase enzyme IIB component;                                                         |
| P | P69827 | DE | PTS system mannitol-specific EIIB component;                                                                       |
| P | P69827 | DE | PTS system mannitol-specific EIIC component;                                                                       |
| P | P69827 | DE | PTS system mannitol-specific cryptic EIICB component;                                                              |
| P | P69828 | CC | This system is involved in galactitol transport.                                                                   |
| P | P69828 | DE | Galactitol-specific phosphotransferase enzyme IIA component;                                                       |
| P | P69828 | DE | PTS system galactitol-specific EIIA component;                                                                     |
| P | P69831 | CC | This system is involved in galactitol transport.                                                                   |
| P | P69831 | DE | Galactitol permease IIC component;                                                                                 |
| P | P69831 | DE | PTS system galactitol-specific EIIC component;                                                                     |
| P | P69832 | CC | This system is involved in galactitol transport (By similarity).                                                   |
| P | P69832 | DE | Galactitol permease IIC component;                                                                                 |
| P | P69832 | DE | PTS system galactitol-specific EIIC component;                                                                     |
| P | P69874 | CC | Part of the ABC transporter complex PstABCD involved in spermidine/putrescine import                               |
| P | P69874 | CC | Part of the ABC transporter complex PstABCD involved in spermidine/putrescine import                               |
| P | P69874 | DE | Spermidine/putrescine import ATP-binding protein PotA;                                                             |
| P | P69874 | DE | Spermidine/putrescine import ATP-binding protein PotA;                                                             |
| P | P69874 | DR | polyamine-transporting ATPase activity                                                                             |
| P | P69876 | CC | Part of the ABC transporter complex PstABCD involved in spermidine/putrescine import                               |
| P | P69876 | CC | Part of the ABC transporter complex PstABCD involved in spermidine/putrescine import                               |
| P | P69876 | DE | Spermidine/putrescine import ATP-binding protein PotA;                                                             |
| P | P69876 | DE | Spermidine/putrescine import ATP-binding protein PotA;                                                             |
| P | P69877 | CC | Part of the ABC transporter complex PstABCD involved in spermidine/putrescine import                               |
| P | P69877 | CC | Part of the ABC transporter complex PstABCD involved in spermidine/putrescine import                               |
| P | P69877 | DE | Spermidine/putrescine import ATP-binding protein PotA;                                                             |
| P | P69877 | DE | Spermidine/putrescine import ATP-binding protein PotA;                                                             |
| P | P69879 | CC | Part of the ABC transporter complex PstSACB involved in phosphate import                                           |
| P | P69879 | DE | ABC phosphate transporter;                                                                                         |
| P | P69879 | DE | Phosphate import ATP-binding protein PstB;                                                                         |
| P | P69879 | DE | Phosphate-transporting ATPase;                                                                                     |
| P | P69879 | DR | inorganic phosphate transmembrane transporter activity                                                             |
| P | P69879 | DR | phosphate transmembrane-transporting ATPase activity                                                               |
| P | P69881 | CC | Part of the ABC transporter complex PstSACB involved in phosphate import                                           |
| P | P69881 | DE | ABC phosphate transporter;                                                                                         |
| P | P69881 | DE | Phosphate import ATP-binding protein PstB;                                                                         |
| P | P69881 | DE | Phosphate-transporting ATPase;                                                                                     |
| P | P69881 | DR | inorganic phosphate transmembrane transporter activity                                                             |
| P | P69881 | DR | phosphate transmembrane-transporting ATPase activity                                                               |
| P | P70172 | CC | Plays a critical role in the sodium-dependent reabsorption of bile acids from the lumen of the small intestine     |
| P | P70172 | DE | Apical sodium-dependent bile acid transporter;                                                                     |
| P | P70172 | DE | Apical sodium-dependent bile acid transporter;                                                                     |
| P | P70172 | DE | Ileal Na <sup>+</sup> /bile acid cotransporter;                                                                    |
| P | P70172 | DE | Ileal Na <sup>+</sup> /bile acid cotransporter;                                                                    |
| P | P70172 | DE | Ileal sodium-dependent bile acid transporter;                                                                      |
| P | P70172 | DE | Ileal sodium-dependent bile acid transporter;                                                                      |
| P | P70172 | DE | Ileal sodium/bile acid cotransporter;                                                                              |
| P | P70172 | DE | Ileal sodium/bile acid cotransporter;                                                                              |
| P | P70172 | DE | Na <sup>+</sup> -dependent ileal bile acid transporter;                                                            |
| P | P70172 | DE | Na <sup>+</sup> -dependent ileal bile acid transporter;                                                            |
| P | P70172 | DE | Sodium/taurocholate cotransporting polypeptide, ileal;                                                             |
| P | P70187 | DR | tetracycline:hydrogen antiporter activity                                                                          |
| P | P70227 | CC | Receptor for inositol 1,4,5-trisphosphate, a second messenger that mediates the release of intracellular calcium.  |
| P | P70227 | DR | inositol 1,4,5-trisphosphate-sensitive calcium-release channel activity                                            |
| P | P70414 | CC | Ca <sup>2+</sup> is extruded from the cell during relaxation so as to prevent overloading of intracellular stores. |
| P | P70414 | CC | Rapidly transports Ca <sup>2+</sup> during excitation-contraction coupling                                         |
| P | P70414 | DE | Na <sup>+</sup> /Ca <sup>2+</sup> -exchange protein 1;                                                             |
| P | P70414 | DE | Na <sup>+</sup> /Ca <sup>2+</sup> -exchange protein 1;                                                             |
| P | P70414 | DE | Sodium/calcium exchanger 1;                                                                                        |

|   |        |    |                                                                                                                                                                                                            |
|---|--------|----|------------------------------------------------------------------------------------------------------------------------------------------------------------------------------------------------------------|
| P | P70414 | DE | Sodium/calcium exchanger 1;                                                                                                                                                                                |
| P | P70414 | DR | calcium:sodium antiporter activity                                                                                                                                                                         |
| P | P70414 | DR | calcium:sodium antiporter activity                                                                                                                                                                         |
| P | P70786 | CC | Component of the tartrate utilization system and may allow entry of tartrate and tartrate dehydrogenase.                                                                                                   |
| P | P70786 | DE | Putative tartrate transporter;                                                                                                                                                                             |
| P | P71067 | DR | lactate transmembrane transporter activity                                                                                                                                                                 |
| P | P71338 | DE | Iron(III)-transport system permease protein fbpB 2;                                                                                                                                                        |
| P | P71370 | CC | This protein is a component of the oligopeptide permease, a binding protein-dependent transport system, it binds peptides up to five amino acids long with high affinity (By similarity).                  |
| P | P71370 | DE | Periplasmic oligopeptide-binding protein;                                                                                                                                                                  |
| P | P71678 | CC | Confers resistance to ethidium bromide                                                                                                                                                                     |
| P | P72479 | DE | Oligopeptide transport ATP-binding protein OppF;                                                                                                                                                           |
| P | P72827 | CC | plays an important role in protecting the acceptor side of photosystem II (PSII) against oxidative damage, especially under iron-limiting growth conditions (Probable)                                     |
| P | P72827 | DE | Iron uptake protein A1;                                                                                                                                                                                    |
| P | P73182 | DE | Ferrous iron transport protein B homolog;                                                                                                                                                                  |
| P | P73182 | DR | ferrous iron transmembrane transporter activity                                                                                                                                                            |
| P | P73265 | CC | Probably part of a high-affinity binding-protein- dependent transport system for nitrate                                                                                                                   |
| P | P73265 | DE | Putative nitrate transport ATP-binding protein NrtD;                                                                                                                                                       |
| P | P73450 | CC | Probably part of a high-affinity binding-protein- dependent transport system for nitrate                                                                                                                   |
| P | P73450 | DE | Nitrate transport ATP-binding protein NrtC;                                                                                                                                                                |
| P | P73450 | DR | nitrate transmembrane transporter activity                                                                                                                                                                 |
| P | P73451 | CC | Probably part of a high-affinity binding-protein- dependent transport system for nitrate; probably responsible for the translocation of the substrate across the membrane (By similarity).                 |
| P | P73451 | DE | Nitrate transport permease protein nrtB;                                                                                                                                                                   |
| P | P73451 | DR | nitrate transmembrane transporter activity                                                                                                                                                                 |
| P | P73452 | CC | Essential component of the nitrate-transporting system                                                                                                                                                     |
| P | P73452 | DE | Nitrate transport protein NrtA;                                                                                                                                                                            |
| P | P73788 | CC | Part of the ABC transporter complex PstSACB involved in phosphate import                                                                                                                                   |
| P | P73788 | DE | ABC phosphate transporter 3;                                                                                                                                                                               |
| P | P73788 | DE | Phosphate import ATP-binding protein PstB 3;                                                                                                                                                               |
| P | P73788 | DE | Phosphate-transporting ATPase 3;                                                                                                                                                                           |
| P | P73788 | DR | inorganic phosphate transmembrane transporter activity                                                                                                                                                     |
| P | P73788 | DR | phosphate transmembrane-transporting ATPase activity                                                                                                                                                       |
| P | P73809 | CC | Channel that permits osmotically driven movement of water in both directions                                                                                                                               |
| P | P73809 | CC | It mediates rapid entry or exit of water in response to abrupt changes in osmolarity (By similarity).                                                                                                      |
| P | P73867 | CC | One of the components of the high-affinity ATP-driven potassium transport (or KDP) system, which catalyzes the hydrolysis of ATP coupled with the exchange of hydrogen and potassium ions (By similarity). |
| P | P73867 | DE | Potassium-binding and translocating subunit B;                                                                                                                                                             |
| P | P73867 | DE | Potassium-translocating ATPase B chain;                                                                                                                                                                    |
| P | P73867 | DE | Potassium-transporting ATPase B chain;                                                                                                                                                                     |
| P | P73867 | DR | potassium-transporting ATPase activity                                                                                                                                                                     |
| P | P74072 | DE | H <sup>+</sup> /Ca <sup>2+</sup> exchanger;                                                                                                                                                                |
| P | P74547 | CC | Part of the ABC transporter complex CysAWTP (TC 3.A.1.6.1) involved in sulfate/thiosulfate import                                                                                                          |
| P | P74547 | DE | Sulfate transport system permease protein CysW;                                                                                                                                                            |
| P | P74547 | DR | sulfate transmembrane transporter activity                                                                                                                                                                 |
| P | P74548 | CC | Part of the ABC transporter complex CysAWTP involved in sulfate/thiosulfate import                                                                                                                         |
| P | P74548 | DE | Sulfate-transporting ATPase;                                                                                                                                                                               |
| P | P74548 | DE | Sulfate/thiosulfate import ATP-binding protein CysA;                                                                                                                                                       |
| P | P74548 | DR | sulfate transmembrane-transporting ATPase activity                                                                                                                                                         |
| P | P74884 | DE | Ferrous iron transport protein B;                                                                                                                                                                          |
| P | P74884 | DR | ferrous iron transmembrane transporter activity                                                                                                                                                            |
| P | P74997 | DE | Lipoprotein-releasing system ATP-binding protein LolD;                                                                                                                                                     |
| P | P74997 | DR | lipoprotein transporter activity                                                                                                                                                                           |
| P | P75039 | CC | This system is involved in fructose transport (By similarity).                                                                                                                                             |
| P | P75039 | DE | Fructose permease IIC component;                                                                                                                                                                           |
| P | P75039 | DE | Fructose-specific phosphotransferase enzyme IIA component;                                                                                                                                                 |
| P | P75039 | DE | Fructose-specific phosphotransferase enzyme IIB component;                                                                                                                                                 |
| P | P75039 | DE | PTS system fructose-specific EIIA component;                                                                                                                                                               |

|   |        |    |                                                                                                                                                                                            |
|---|--------|----|--------------------------------------------------------------------------------------------------------------------------------------------------------------------------------------------|
| P | P75039 | DE | PTS system fructose-specific EIIABC component;                                                                                                                                             |
| P | P75039 | DE | PTS system fructose-specific EIIB component;                                                                                                                                               |
| P | P75039 | DE | PTS system fructose-specific EIIC component;                                                                                                                                               |
| P | P75057 | CC | Required for the activity of the bacterial transport system of putrescine and spermidine (By similarity).                                                                                  |
| P | P75057 | CC | Required for the activity of the bacterial transport system of putrescine and spermidine (By similarity).                                                                                  |
| P | P75057 | DE | Spermidine/putrescine transport system permease protein PotC homolog;                                                                                                                      |
| P | P75057 | DE | Spermidine/putrescine transport system permease protein PotC homolog;                                                                                                                      |
| P | P75058 | CC | Required for the activity of the bacterial transport system of putrescine and spermidine (By similarity).                                                                                  |
| P | P75058 | CC | Required for the activity of the bacterial transport system of putrescine and spermidine (By similarity).                                                                                  |
| P | P75058 | DE | Spermidine/putrescine transport system permease protein PotB homolog;                                                                                                                      |
| P | P75058 | DE | Spermidine/putrescine transport system permease protein PotB homolog;                                                                                                                      |
| P | P75059 | CC | Part of the ABC transporter complex PotABCD involved in spermidine/putrescine import                                                                                                       |
| P | P75059 | CC | Part of the ABC transporter complex PotABCD involved in spermidine/putrescine import                                                                                                       |
| P | P75059 | DE | Spermidine/putrescine import ATP-binding protein PotA;                                                                                                                                     |
| P | P75059 | DE | Spermidine/putrescine import ATP-binding protein PotA;                                                                                                                                     |
| P | P75071 | CC | Glycerol enters the cell via the glycerol diffusion facilitator protein                                                                                                                    |
| P | P75071 | CC | This membrane protein facilitates the movement of glycerol across the cytoplasmic membrane (By similarity).                                                                                |
| P | P75071 | DE | Probable glycerol uptake facilitator protein;                                                                                                                                              |
| P | P75145 | CC | This system is involved in mannitol transport (By similarity).                                                                                                                             |
| P | P75145 | DE | Mannitol-specific phosphotransferase enzyme IIA component;                                                                                                                                 |
| P | P75145 | DE | PTS system mannitol-specific EIIA component;                                                                                                                                               |
| P | P75146 | CC | This system is involved in mannitol transport (By similarity).                                                                                                                             |
| P | P75146 | DE | Mannitol permease IIC component;                                                                                                                                                           |
| P | P75146 | DE | Mannitol-specific phosphotransferase enzyme IIB component;                                                                                                                                 |
| P | P75146 | DE | PTS system mannitol-specific EIIB component;                                                                                                                                               |
| P | P75146 | DE | PTS system mannitol-specific EIIC component;                                                                                                                                               |
| P | P75146 | DE | PTS system mannitol-specific EIICB component;                                                                                                                                              |
| P | P75185 | CC | Could be part of a binding-protein-dependent transport system for phosphate; probably responsible for the translocation of the substrate across the membrane (By similarity)               |
| P | P75185 | DE | Phosphate transport system permease protein pstA homolog;                                                                                                                                  |
| P | P75185 | DR | inorganic phosphate transmembrane transporter activity                                                                                                                                     |
| P | P75186 | CC | Part of the ABC transporter complex PstSACB involved in phosphate import                                                                                                                   |
| P | P75186 | DE | ABC phosphate transporter;                                                                                                                                                                 |
| P | P75186 | DE | Phosphate import ATP-binding protein PstB;                                                                                                                                                 |
| P | P75186 | DE | Phosphate-transporting ATPase;                                                                                                                                                             |
| P | P75186 | DR | inorganic phosphate transmembrane transporter activity                                                                                                                                     |
| P | P75186 | DR | phosphate transmembrane-transporting ATPase activity                                                                                                                                       |
| P | P75551 | DE | Oligopeptide transport ATP-binding protein OppF;                                                                                                                                           |
| P | P75552 | DE | Oligopeptide transport ATP-binding protein OppD;                                                                                                                                           |
| P | P75553 | DE | Oligopeptide transport system permease protein oppC;                                                                                                                                       |
| P | P75554 | DE | Oligopeptide transport system permease protein oppB;                                                                                                                                       |
| P | P75569 | CC | This system is involved in glucose transport (By similarity).                                                                                                                              |
| P | P75569 | DE | Glucose permease IIC component;                                                                                                                                                            |
| P | P75569 | DE | Glucose-specific phosphotransferase enzyme IIA component;                                                                                                                                  |
| P | P75569 | DE | Glucose-specific phosphotransferase enzyme IIB component;                                                                                                                                  |
| P | P75569 | DE | PTS system glucose-specific EIIA component;                                                                                                                                                |
| P | P75569 | DE | PTS system glucose-specific EIIB component;                                                                                                                                                |
| P | P75569 | DE | PTS system glucose-specific EIIC component;                                                                                                                                                |
| P | P75569 | DE | PTS system glucose-specific EIICBA component;                                                                                                                                              |
| P | P75780 | CC | involved in the active transport across the outer membrane of iron complexes with catecholate siderophores such as dihydroxybenzoylserine and dihydroxybenzoate                            |
| P | P75780 | DE | Ferric iron uptake protein;                                                                                                                                                                |
| P | P76350 | DE | Shikimate transporter;                                                                                                                                                                     |
| P | P77348 | CC | The transport is effected by the oligopeptide permease system.                                                                                                                             |
| P | P78334 | CC | GABA, the major inhibitory neurotransmitter in the vertebrate brain, mediates neuronal inhibition by binding to the GABA/benzodiazepine receptor and opening an integral chloride channel. |
| P | P78334 | DR | chloride channel activity                                                                                                                                                                  |
| P | P78348 | CC | Cation channel with high affinity for sodium, which is gated by extracellular protons and inhibited by the diuretic amiloride                                                              |



|   |        |    |                                                                                                                                                                                                                                                                                                          |
|---|--------|----|----------------------------------------------------------------------------------------------------------------------------------------------------------------------------------------------------------------------------------------------------------------------------------------------------------|
| P | P78348 | DE | Brain sodium channel 2;                                                                                                                                                                                                                                                                                  |
| P | P78348 | DR | ligand-gated sodium channel activity                                                                                                                                                                                                                                                                     |
| P | P78363 | CC | Once transported to the cytoplasmic surface, ATR is reduced to vitamin A by trans- retinol dehydrogenase (tRDH) and then transferred to the retinal pigment epithelium (RPE) where it is converted to 11-cis-retinal                                                                                     |
| P | P78363 | DE | Retinal-specific ATP-binding cassette transporter;                                                                                                                                                                                                                                                       |
| P | P78381 | DE | UDP-galactose translocator;                                                                                                                                                                                                                                                                              |
| P | P78381 | DE | UDP-galactose transporter;                                                                                                                                                                                                                                                                               |
| P | P78381 | DR | UDP-galactose transmembrane transporter activity                                                                                                                                                                                                                                                         |
| P | P78383 | DE | UDP-galactose transporter-related protein 1;                                                                                                                                                                                                                                                             |
| P | P78383 | DR | UDP-galactose transmembrane transporter activity                                                                                                                                                                                                                                                         |
| P | P78508 | CC | Inward rectifier potassium channels are characterized by a greater tendency to allow potassium to flow into the cell rather than out of it                                                                                                                                                               |
| P | P78508 | CC | May be responsible for potassium buffering action of glial cells in the brain                                                                                                                                                                                                                            |
| P | P78508 | CC | Their voltage dependence is regulated by the concentration of extracellular potassium; as external potassium is raised, the voltage range of the channel opening shifts to more positive voltages                                                                                                        |
| P | P78508 | DE | ATP-dependent inwardly rectifying potassium channel Kir4.1;                                                                                                                                                                                                                                              |
| P | P78508 | DE | ATP-sensitive inward rectifier potassium channel 10;                                                                                                                                                                                                                                                     |
| P | P78508 | DE | Inward rectifier K+ channel Kir1.2;                                                                                                                                                                                                                                                                      |
| P | P78508 | DE | Potassium channel, inwardly rectifying subfamily J member 10;                                                                                                                                                                                                                                            |
| P | P78508 | DR | ATP-activated inward rectifier potassium channel activity                                                                                                                                                                                                                                                |
| P | P78831 | CC | High-affinity glucose transporter.                                                                                                                                                                                                                                                                       |
| P | P78831 | DE | High-affinity glucose transporter ght5;                                                                                                                                                                                                                                                                  |
| P | P80183 | CC | This is an energy-conserving, sodium-ion translocating step.                                                                                                                                                                                                                                             |
| P | P80184 | CC | This is an energy-conserving, sodium-ion translocating step.                                                                                                                                                                                                                                             |
| P | P80185 | CC | This is an energy-conserving, sodium-ion translocating step.                                                                                                                                                                                                                                             |
| P | P80186 | CC | This is an energy-conserving, sodium-ion translocating step.                                                                                                                                                                                                                                             |
| P | P80187 | CC | This is an energy-conserving, sodium-ion translocating step                                                                                                                                                                                                                                              |
| P | P86046 | CC | Inward rectifier potassium channels are characterized by a greater tendency to allow potassium to flow into the cell rather than out of it                                                                                                                                                               |
| P | P86046 | CC | Their voltage dependence is regulated by the concentration of extracellular potassium; as external potassium is raised, the voltage range of the channel opening shifts to more positive voltages                                                                                                        |
| P | P86046 | DE | Inward rectifier K+ channel Kir7.1;                                                                                                                                                                                                                                                                      |
| P | P86046 | DE | Inward rectifier potassium channel 13;                                                                                                                                                                                                                                                                   |
| P | P86046 | DE | Potassium channel, inwardly rectifying subfamily J member 13;                                                                                                                                                                                                                                            |
| P | P86046 | DR | inward rectifier potassium channel activity                                                                                                                                                                                                                                                              |
| P | P87041 | CC | Essential for the transport of UDP-galactose into the lumen of Golgi apparatus.                                                                                                                                                                                                                          |
| P | P87041 | DE | UDP-galactose transporter;                                                                                                                                                                                                                                                                               |
| P | P87041 | DR | UDP-galactose transmembrane transporter activity                                                                                                                                                                                                                                                         |
| P | P87110 | CC | Transporter for myo-inositol.                                                                                                                                                                                                                                                                            |
| P | P87110 | DE | Myo-inositol transporter 2;                                                                                                                                                                                                                                                                              |
| P | P87110 | DR | myo-inositol transmembrane transporter activity                                                                                                                                                                                                                                                          |
| P | P87149 | CC | Mitochondrial inner membrane magnesium transporter required for mitochondrial magnesium homeostasis                                                                                                                                                                                                      |
| P | P87149 | DE | Mitochondrial inner membrane magnesium transporter mrs2;                                                                                                                                                                                                                                                 |
| P | P87149 | DR | magnesium ion transmembrane transporter activity                                                                                                                                                                                                                                                         |
| P | P91645 | CC | Voltage-sensitive calcium channels (VSCC) mediate the entry of calcium ions into excitable cells and are also involved in a variety of calcium-dependent processes, including muscle contraction, neurotransmitter release, gene expression, cell motility, cell division and cell death (By similarity) |
| P | P91645 | DE | Voltage-dependent calcium channel type A subunit alpha-1;                                                                                                                                                                                                                                                |
| P | P91645 | DR | voltage-gated calcium channel activity                                                                                                                                                                                                                                                                   |
| P | P92935 | DE | ADP,ATP carrier protein 2, chloroplastic;                                                                                                                                                                                                                                                                |
| P | P92935 | DE | ADP/ATP translocase 2;                                                                                                                                                                                                                                                                                   |
| P | P92935 | DE | ADP/ATP translocase 2;                                                                                                                                                                                                                                                                                   |
| P | P92935 | DR | ATP:ADP antiporter activity                                                                                                                                                                                                                                                                              |
| P | P92935 | DR | ATP:ADP antiporter activity                                                                                                                                                                                                                                                                              |
| P | P92939 | CC | This magnesium-dependent enzyme catalyzes the hydrolysis of ATP coupled with the translocation of calcium from the cytosol to the endoplasmic reticulum lumen                                                                                                                                            |
| P | P92939 | DE | Calcium-transporting ATPase 1, endoplasmic reticulum-type;                                                                                                                                                                                                                                               |
| P | P92939 | DR | calcium-transporting ATPase activity                                                                                                                                                                                                                                                                     |
| P | P92941 | CC | voltage-gated chloride channel that could play a role in the regulation of intracellular content                                                                                                                                                                                                         |
| P | P92941 | DE | Chloride channel protein CLC-a;                                                                                                                                                                                                                                                                          |

|   |        |    |                                                                                                                                                                                                 |
|---|--------|----|-------------------------------------------------------------------------------------------------------------------------------------------------------------------------------------------------|
| P | P92941 | DR | voltage-gated chloride channel activity                                                                                                                                                         |
| P | P92942 | CC | Voltage-gated chloride channel.                                                                                                                                                                 |
| P | P92942 | DE | Chloride channel protein CLC-b;                                                                                                                                                                 |
| P | P92942 | DR | voltage-gated chloride channel activity                                                                                                                                                         |
| P | P92943 | CC | Voltage-gated chloride channel.                                                                                                                                                                 |
| P | P92943 | DE | Chloride channel protein CLC-d;                                                                                                                                                                 |
| P | P92943 | DR | voltage-gated chloride channel activity                                                                                                                                                         |
| P | P92946 | CC | Low-affinity H <sup>+</sup> /sulfate cotransporter that may be involved in the distribution of sulfate from vascular bundles to the palisade cells of the leaves                                |
| P | P92946 | CC | Plays a central role in the regulation of sulfate assimilation.                                                                                                                                 |
| P | P92946 | DE | Sulfate transporter 2.2;                                                                                                                                                                        |
| P | P92946 | DR | secondary active sulfate transmembrane transporter activity                                                                                                                                     |
| P | P92960 | CC | Could mediate potassium uptake from the soil solution by plant roots in association with AKT1.                                                                                                  |
| P | P92960 | CC | Probable modulatory (alpha) subunit of inward-rectifying potassium channels                                                                                                                     |
| P | P92960 | DE | Potassium channel KAT3;                                                                                                                                                                         |
| P | P92960 | DE | Potassium channel TKC;                                                                                                                                                                          |
| P | P92960 | DR | voltage-gated potassium channel activity                                                                                                                                                        |
| P | P92961 | DE | Proline transporter 1;                                                                                                                                                                          |
| P | P93004 | CC | Water channel required to facilitate the transport of water across cell membrane                                                                                                                |
| P | P93004 | DR | water channel activity                                                                                                                                                                          |
| P | P94131 | DE | Cis,cis-muconate transport protein;                                                                                                                                                             |
| P | P94363 | CC | Proton motive force-driven secondary transporter that catalyzes the uptake of both citrate and malate                                                                                           |
| P | P94363 | DE | Citrate/malate transporter;                                                                                                                                                                     |
| P | P94363 | DE | Citrate/malate-proton symporter;                                                                                                                                                                |
| P | P94606 | CC | One of the components of the high-affinity ATP-driven potassium transport (or KDP) system, which catalyzes the hydrolysis of ATP coupled with the exchange of hydrogen and potassium ions       |
| P | P94606 | DE | Potassium-binding and translocating subunit C;                                                                                                                                                  |
| P | P94606 | DE | Potassium-translocating ATPase C chain;                                                                                                                                                         |
| P | P94606 | DE | Potassium-transporting ATPase C chain;                                                                                                                                                          |
| P | P94606 | DR | potassium-transporting ATPase activity                                                                                                                                                          |
| P | P94633 | DE | Lysine exporter protein;                                                                                                                                                                        |
| P | P95302 | CC | Part of the ABC transporter complex PstSACB involved in phosphate import                                                                                                                        |
| P | P95302 | DE | ABC phosphate transporter 2;                                                                                                                                                                    |
| P | P95302 | DE | Phosphate import ATP-binding protein PstB 2;                                                                                                                                                    |
| P | P95302 | DE | Phosphate-transporting ATPase 2;                                                                                                                                                                |
| P | P95302 | DR | inorganic phosphate transmembrane transporter activity                                                                                                                                          |
| P | P95302 | DR | phosphate transmembrane-transporting ATPase activity                                                                                                                                            |
| P | P96169 | CC | Actively transports glucose into cells by Na <sup>+</sup> cotransport (By similarity).                                                                                                          |
| P | P96169 | CC | Actively transports glucose into cells by Na <sup>+</sup> cotransport (By similarity).                                                                                                          |
| P | P96169 | DE | Na <sup>+</sup> /glucose symporter;                                                                                                                                                             |
| P | P96169 | DE | Na <sup>+</sup> /glucose symporter;                                                                                                                                                             |
| P | P96169 | DE | Sodium/glucose cotransporter;                                                                                                                                                                   |
| P | P96169 | DE | Sodium/glucose cotransporter;                                                                                                                                                                   |
| P | P96335 | CC | Responsible for glycerol-3-phosphate uptake (By similarity).                                                                                                                                    |
| P | P96335 | DE | Glycerol-3-phosphate transporter;                                                                                                                                                               |
| P | P96335 | DR | glycerol-3-phosphate transmembrane transporter activity                                                                                                                                         |
| P | P96593 | CC | H <sup>+</sup> -stimulated, highly selective, manganese uptake system                                                                                                                           |
| P | P96593 | CC | may be the predominant transporter of manganese during logarithmic phase growth                                                                                                                 |
| P | P96593 | DE | Manganese transport protein mnH;                                                                                                                                                                |
| P | P97370 | CC | This is the non-catalytic component of the active enzyme, which catalyzes the hydrolysis of ATP coupled with the exchange of Na <sup>+</sup> and K <sup>+</sup> ions across the plasma membrane |
| P | P97370 | CC | This is the non-catalytic component of the active enzyme, which catalyzes the hydrolysis of ATP coupled with the exchange of Na <sup>+</sup> and K <sup>+</sup> ions across the plasma membrane |
| P | P97370 | DE | Sodium/potassium-dependent ATPase subunit beta-3;                                                                                                                                               |
| P | P97370 | DE | Sodium/potassium-dependent ATPase subunit beta-3;                                                                                                                                               |
| P | P97370 | DE | Sodium/potassium-transporting ATPase subunit beta-3;                                                                                                                                            |
| P | P97370 | DE | Sodium/potassium-transporting ATPase subunit beta-3;                                                                                                                                            |
| P | P97370 | DR | sodium:potassium-exchanging ATPase activity                                                                                                                                                     |
| P | P97370 | DR | sodium:potassium-exchanging ATPase activity                                                                                                                                                     |
| P | P97438 | CC | Outward rectifying potassium channel.                                                                                                                                                           |
| P | P97438 | DE | Outward rectifying potassium channel protein TREK-1;                                                                                                                                            |
| P | P97438 | DE | Potassium channel subfamily K member 2;                                                                                                                                                         |

|   |        |    |                                                                                                                                                                                                                                                                                                     |
|---|--------|----|-----------------------------------------------------------------------------------------------------------------------------------------------------------------------------------------------------------------------------------------------------------------------------------------------------|
| P | P97438 | DE | TREK-1 K <sup>+</sup> channel subunit;                                                                                                                                                                                                                                                              |
| P | P97438 | DE | Two pore potassium channel TPKC1;                                                                                                                                                                                                                                                                   |
| P | P97438 | DR | voltage-gated potassium channel activity                                                                                                                                                                                                                                                            |
| P | P97441 | CC | Involved in accumulation of zinc in synaptic vesicles.                                                                                                                                                                                                                                              |
| P | P97441 | DE | Zinc transporter 3;                                                                                                                                                                                                                                                                                 |
| P | P97441 | DR | zinc ion transmembrane transporter activity                                                                                                                                                                                                                                                         |
| P | P97445 | CC | P/Q-type calcium channels belong to the high-voltage activated (HVA) group and are blocked by the funnel toxin (Ftx) and by the omega-agatoxin- IVA (omega-Aga-IVA).                                                                                                                                |
| P | P97445 | CC | The isoform alpha-1A gives rise to P and/or Q-type calcium currents                                                                                                                                                                                                                                 |
| P | P97445 | CC | Voltage-sensitive calcium channels (VSCC) mediate the entry of calcium ions into excitable cells and are also involved in a variety of calcium-dependent processes, including muscle contraction, hormone or neurotransmitter release, gene expression, cell motility, cell division and cell death |
| P | P97445 | DE | Brain calcium channel I;                                                                                                                                                                                                                                                                            |
| P | P97445 | DE | Calcium channel, L type, alpha-1 polypeptide isoform 4;                                                                                                                                                                                                                                             |
| P | P97445 | DE | Voltage-dependent P/Q-type calcium channel subunit alpha-1A;                                                                                                                                                                                                                                        |
| P | P97445 | DE | Voltage-gated calcium channel subunit alpha Cav2.1;                                                                                                                                                                                                                                                 |
| P | P97445 | DR | high voltage-gated calcium channel activity                                                                                                                                                                                                                                                         |
| P | P97521 | DE | Carnitine/acylcarnitine translocase;                                                                                                                                                                                                                                                                |
| P | P97521 | DE | Mitochondrial carnitine/acylcarnitine carrier protein;                                                                                                                                                                                                                                              |
| P | P97794 | CC | Inward rectifier potassium channels are characterized by a greater tendency to allow potassium to flow into the cell rather than out of it                                                                                                                                                          |
| P | P97794 | CC | Their voltage dependence is regulated by the concentration of extracellular potassium; as external potassium is raised, the voltage range of the channel opening shifts to more positive voltages                                                                                                   |
| P | P97794 | CC | This potassium channel is controlled by G proteins                                                                                                                                                                                                                                                  |
| P | P97794 | DE | ATP-sensitive inward rectifier potassium channel 8;                                                                                                                                                                                                                                                 |
| P | P97794 | DE | Inward rectifier K <sup>+</sup> channel Kir6.1;                                                                                                                                                                                                                                                     |
| P | P97794 | DE | Potassium channel, inwardly rectifying subfamily J member 8;                                                                                                                                                                                                                                        |
| P | P97858 | DE | UDP-galactose translocator 2;                                                                                                                                                                                                                                                                       |
| P | P97858 | DE | UDP-galactose transporter-related protein 1;                                                                                                                                                                                                                                                        |
| P | P98194 | CC | This magnesium-dependent enzyme catalyzes the hydrolysis of ATP coupled with the transport of the calcium.                                                                                                                                                                                          |
| P | P98194 | DE | ATP-dependent Ca <sup>2+</sup> pump PMR1;                                                                                                                                                                                                                                                           |
| P | P98194 | DE | Calcium-transporting ATPase type 2C member 1;                                                                                                                                                                                                                                                       |
| P | P98194 | DR | calcium-transporting ATPase activity                                                                                                                                                                                                                                                                |
| P | P98194 | DR | manganese-transporting ATPase activity                                                                                                                                                                                                                                                              |
| P | Q00325 | CC | Phosphate is cotransported with H <sup>+</sup> .                                                                                                                                                                                                                                                    |
| P | Q00325 | CC | Transport of phosphate groups from the cytosol to the mitochondrial matrix                                                                                                                                                                                                                          |
| P | Q00325 | DE | Phosphate carrier protein, mitochondrial;                                                                                                                                                                                                                                                           |
| P | Q00325 | DE | Phosphate transport protein;                                                                                                                                                                                                                                                                        |
| P | Q00325 | DR | phosphate carrier activity                                                                                                                                                                                                                                                                          |
| P | Q00749 | CC | Involved in a binding protein-dependent transport system responsible for the uptake of melibiose, raffinose and isomaltotriose.                                                                                                                                                                     |
| P | Q00749 | CC | Involved in a binding protein-dependent transport system responsible for the uptake of melibiose, raffinose and isomaltotriose.                                                                                                                                                                     |
| P | Q00750 | CC | Involved in a binding protein-dependent transport system responsible for the uptake of melibiose, raffinose and isomaltotriose.                                                                                                                                                                     |
| P | Q00750 | CC | Involved in a binding protein-dependent transport system responsible for the uptake of melibiose, raffinose and isomaltotriose.                                                                                                                                                                     |
| P | Q00751 | CC | Involved in a binding protein-dependent transport system responsible for the uptake of melibiose, raffinose and isomaltotriose.                                                                                                                                                                     |
| P | Q00751 | CC | Involved in a binding protein-dependent transport system responsible for the uptake of melibiose, raffinose and isomaltotriose.                                                                                                                                                                     |
| P | Q00752 | CC | Involved in a binding protein-dependent transport system responsible for the uptake of melibiose, raffinose and isomaltotriose                                                                                                                                                                      |
| P | Q00752 | CC | Involved in a binding protein-dependent transport system responsible for the uptake of melibiose, raffinose and isomaltotriose                                                                                                                                                                      |
| P | Q00975 | CC | Calcium channels containing alpha-1B subunit may play a role in directed migration of immature neurons.                                                                                                                                                                                             |
| P | Q00975 | CC | N-type calcium channels belong to the 'high-voltage activated' (HVA) group and are blocked by omega-conotoxin-GVIA (omega-CTx-GVIA) and by omega-agatoxin- IIIA (omega-Aga-IIIA)                                                                                                                    |
| P | Q00975 | CC | The isoform alpha-1B gives rise to N-type calcium currents                                                                                                                                                                                                                                          |

|   |        |    |                                                                                                                                                                                                                                                                                                     |
|---|--------|----|-----------------------------------------------------------------------------------------------------------------------------------------------------------------------------------------------------------------------------------------------------------------------------------------------------|
| P | Q00975 | CC | Voltage-sensitive calcium channels (VSCC) mediate the entry of calcium ions into excitable cells and are also involved in a variety of calcium-dependent processes, including muscle contraction, hormone or neurotransmitter release, gene expression, cell motility, cell division and cell death |
| P | Q00975 | DE | Brain calcium channel III;                                                                                                                                                                                                                                                                          |
| P | Q00975 | DE | Calcium channel, L type, alpha-1 polypeptide isoform 5;                                                                                                                                                                                                                                             |
| P | Q00975 | DE | Voltage-dependent N-type calcium channel subunit alpha-1B;                                                                                                                                                                                                                                          |
| P | Q00975 | DE | Voltage-gated calcium channel subunit alpha Cav2.2;                                                                                                                                                                                                                                                 |
| P | Q00975 | DR | voltage-gated calcium channel activity                                                                                                                                                                                                                                                              |
| P | Q01118 | CC | Assuming opened or closed conformations in response to the voltage difference across the membrane, the protein forms a sodium-selective channel through which Na <sup>+</sup> ions may pass in accordance with their electrochemical gradient.                                                      |
| P | Q01118 | CC | Mediates the voltage-dependent sodium ion permeability of excitable membranes                                                                                                                                                                                                                       |
| P | Q01118 | DE | Putative voltage-gated sodium channel subunit alpha Nax;                                                                                                                                                                                                                                            |
| P | Q01118 | DE | Sodium channel protein cardiac and skeletal muscle subunit alpha;                                                                                                                                                                                                                                   |
| P | Q01118 | DE | Sodium channel protein type 7 subunit alpha;                                                                                                                                                                                                                                                        |
| P | Q01118 | DE | Sodium channel protein type VII subunit alpha;                                                                                                                                                                                                                                                      |
| P | Q01118 | DR | voltage-gated sodium channel activity                                                                                                                                                                                                                                                               |
| P | Q01395 | DE | Repressible high-affinity phosphate permease;                                                                                                                                                                                                                                                       |
| P | Q01395 | DR | inorganic phosphate transmembrane transporter activity                                                                                                                                                                                                                                              |
| P | Q01668 | CC | Long-lasting (L-type) calcium channels belong to the 'high-voltage activated' (HVA) group                                                                                                                                                                                                           |
| P | Q01668 | CC | The isoform alpha-1D gives rise to L-type calcium currents                                                                                                                                                                                                                                          |
| P | Q01668 | CC | Voltage-sensitive calcium channels (VSCC) mediate the entry of calcium ions into excitable cells and are also involved in a variety of calcium-dependent processes, including muscle contraction, hormone or neurotransmitter release, gene expression, cell motility, cell division and cell death |
| P | Q01668 | DE | Calcium channel, L type, alpha-1 polypeptide, isoform 2;                                                                                                                                                                                                                                            |
| P | Q01668 | DE | Voltage-dependent L-type calcium channel subunit alpha-1D;                                                                                                                                                                                                                                          |
| P | Q01668 | DE | Voltage-gated calcium channel subunit alpha Cav1.3;                                                                                                                                                                                                                                                 |
| P | Q01668 | DR | voltage-gated calcium channel activity                                                                                                                                                                                                                                                              |
| P | Q01814 | CC | This magnesium-dependent enzyme catalyzes the hydrolysis of ATP coupled with the transport of calcium out of the cell.                                                                                                                                                                              |
| P | Q01814 | DE | Plasma membrane calcium ATPase isoform 2;                                                                                                                                                                                                                                                           |
| P | Q01814 | DE | Plasma membrane calcium pump isoform 2;                                                                                                                                                                                                                                                             |
| P | Q01814 | DE | Plasma membrane calcium-transporting ATPase 2;                                                                                                                                                                                                                                                      |
| P | Q01814 | DR | calcium-transporting ATPase activity                                                                                                                                                                                                                                                                |
| P | Q01857 | DR | sodium:dicarboxylate symporter activity                                                                                                                                                                                                                                                             |
| P | Q01895 | CC | Part of the ABC transporter complex CysAWTP (TC 3.A.1.6.1) involved in sulfate/thiosulfate import                                                                                                                                                                                                   |
| P | Q01895 | DE | Sulfate transport system permease protein CysT;                                                                                                                                                                                                                                                     |
| P | Q01895 | DR | sulfate transmembrane transporter activity                                                                                                                                                                                                                                                          |
| P | Q01896 | CC | This magnesium-dependent enzyme catalyzes the hydrolysis of ATP coupled with the transport of sodium or lithium ions to allow salt tolerance.                                                                                                                                                       |
| P | Q01896 | DE | Sodium transport ATPase 2;                                                                                                                                                                                                                                                                          |
| P | Q01896 | DR | sodium-exporting ATPase activity, phosphorylative mechanism                                                                                                                                                                                                                                         |
| P | Q01903 | CC | This protein specifically binds sulfate and is involved in its transmembrane transport                                                                                                                                                                                                              |
| P | Q01903 | DE | Sulfate-binding protein;                                                                                                                                                                                                                                                                            |
| P | Q01903 | DR | secondary active sulfate transmembrane transporter activity                                                                                                                                                                                                                                         |
| P | Q01903 | DR | sulfate transmembrane-transporting ATPase activity                                                                                                                                                                                                                                                  |
| P | Q01926 | CC | Magnesium transporter that mediates the influx of magnesium into the mitochondrial matrix                                                                                                                                                                                                           |
| P | Q01926 | DE | Magnesium transporter MRS2, mitochondrial;                                                                                                                                                                                                                                                          |
| P | Q01926 | DR | magnesium ion transmembrane transporter activity                                                                                                                                                                                                                                                    |
| P | Q01937 | CC | Part of the binding-protein-dependent transport system for lactose                                                                                                                                                                                                                                  |
| P | Q01937 | DE | Lactose transport ATP-binding protein LacK;                                                                                                                                                                                                                                                         |
| P | Q01959 | CC | Terminates the action of dopamine by its high affinity sodium-dependent reuptake into presynaptic terminals.                                                                                                                                                                                        |
| P | Q01959 | CC | Terminates the action of dopamine by its high affinity sodium-dependent reuptake into presynaptic terminals.                                                                                                                                                                                        |
| P | Q01959 | DE | Sodium-dependent dopamine transporter;                                                                                                                                                                                                                                                              |
| P | Q01959 | DE | Sodium-dependent dopamine transporter;                                                                                                                                                                                                                                                              |
| P | Q02013 | CC | Forms a water-specific channel that provides the plasma membranes of red cells and kidney proximal tubules with high permeability to water, thereby permitting water to move in the direction of an osmotic gradient.                                                                               |

|   |        |    |                                                                                                                                                                                                                                                                                                                                                               |
|---|--------|----|---------------------------------------------------------------------------------------------------------------------------------------------------------------------------------------------------------------------------------------------------------------------------------------------------------------------------------------------------------------|
| P | Q02013 | DE | Water channel protein for red blood cells and kidney proximal tubule;                                                                                                                                                                                                                                                                                         |
| P | Q02013 | DR | water channel activity                                                                                                                                                                                                                                                                                                                                        |
| P | Q02280 | CC | Mediates the potassium permeability of membranes; potassium current is regulated by CaMKII and CASK                                                                                                                                                                                                                                                           |
| P | Q02280 | CC | Structural component of a potassium channel                                                                                                                                                                                                                                                                                                                   |
| P | Q02280 | DE | Potassium voltage-gated channel protein eag;                                                                                                                                                                                                                                                                                                                  |
| P | Q02280 | DR | voltage-gated potassium channel activity                                                                                                                                                                                                                                                                                                                      |
| P | Q02420 | CC | This system is involved in mannitol transport (By similarity).                                                                                                                                                                                                                                                                                                |
| P | Q02420 | DE | Mannitol-specific phosphotransferase enzyme IIA component;                                                                                                                                                                                                                                                                                                    |
| P | Q02420 | DE | PTS system mannitol-specific EIIA component;                                                                                                                                                                                                                                                                                                                  |
| P | Q02783 | CC | Mitochondrial inner membrane magnesium transporter required for mitochondrial magnesium homeostasis                                                                                                                                                                                                                                                           |
| P | Q02783 | DE | Mitochondrial inner membrane magnesium transporter LPE10;                                                                                                                                                                                                                                                                                                     |
| P | Q02783 | DR | magnesium ion transmembrane transporter activity                                                                                                                                                                                                                                                                                                              |
| P | Q02978 | CC | Catalyzes the transport of 2-oxoglutarate across the inner mitochondrial membrane in an electroneutral exchange for malate or other dicarboxylic acids, and plays an important role in several metabolic processes, including the malate-aspartate shuttle, the oxoglutarate/isocitrate shuttle, in gluconeogenesis from lactate, and in nitrogen metabolism. |
| P | Q02978 | CC | Catalyzes the transport of 2-oxoglutarate across the inner mitochondrial membrane in an electroneutral exchange for malate or other dicarboxylic acids, and plays an important role in several metabolic processes, including the malate-aspartate shuttle, the oxoglutarate/isocitrate shuttle, in gluconeogenesis from lactate, and in nitrogen metabolism. |
| P | Q02978 | DE | Mitochondrial 2-oxoglutarate/malate carrier protein;                                                                                                                                                                                                                                                                                                          |
| P | Q02978 | DE | Mitochondrial 2-oxoglutarate/malate carrier protein;                                                                                                                                                                                                                                                                                                          |
| P | Q02978 | DR | oxoglutarate:malate antiporter activity                                                                                                                                                                                                                                                                                                                       |
| P | Q02DK6 | CC | Part of the ABC transporter complex MetNIQ involved in methionine import                                                                                                                                                                                                                                                                                      |
| P | Q02DK6 | DE | Methionine import ATP-binding protein MetN 2;                                                                                                                                                                                                                                                                                                                 |
| P | Q02DK9 | CC | Part of the ABC transporter complex ZnuABC involved in zinc import                                                                                                                                                                                                                                                                                            |
| P | Q02DK9 | DE | Zinc import ATP-binding protein ZnuC;                                                                                                                                                                                                                                                                                                                         |
| P | Q02DK9 | DR | zinc transporting ATPase activity                                                                                                                                                                                                                                                                                                                             |
| P | Q02FW7 | CC | Part of the ABC transporter complex HmuTUV involved in hemin import                                                                                                                                                                                                                                                                                           |
| P | Q02FW7 | DE | Hemin import ATP-binding protein HmuV;                                                                                                                                                                                                                                                                                                                        |
| P | Q02I77 | CC | Transport of potassium into the cell (By similarity).                                                                                                                                                                                                                                                                                                         |
| P | Q02I77 | DE | Probable potassium transport system protein kup;                                                                                                                                                                                                                                                                                                              |
| P | Q02I77 | DR | potassium ion transmembrane transporter activity                                                                                                                                                                                                                                                                                                              |
| P | Q02KC0 | CC | One of the components of the high-affinity ATP-driven potassium transport (or KDP) system, which catalyzes the hydrolysis of ATP coupled with the exchange of hydrogen and potassium ions                                                                                                                                                                     |
| P | Q02KC0 | DE | Potassium-binding and translocating subunit C;                                                                                                                                                                                                                                                                                                                |
| P | Q02KC0 | DE | Potassium-translocating ATPase C chain;                                                                                                                                                                                                                                                                                                                       |
| P | Q02KC0 | DE | Potassium-transporting ATPase C chain;                                                                                                                                                                                                                                                                                                                        |
| P | Q02KC0 | DR | potassium-transporting ATPase activity                                                                                                                                                                                                                                                                                                                        |
| P | Q02KW3 | CC | Na <sup>+</sup> /H <sup>+</sup> antiporter that extrudes sodium in exchange for external protons (By similarity)                                                                                                                                                                                                                                              |
| P | Q02KW3 | DE | Na <sup>+</sup> /H <sup>+</sup> antiporter nhaB;                                                                                                                                                                                                                                                                                                              |
| P | Q02KW3 | DE | Sodium/proton antiporter nhaB;                                                                                                                                                                                                                                                                                                                                |
| P | Q02KW3 | DR | sodium:hydrogen antiporter activity                                                                                                                                                                                                                                                                                                                           |
| P | Q02LI9 | CC | Involved in the import of serine and threonine into the cell, with the concomitant import of sodium (symport system) (By similarity).                                                                                                                                                                                                                         |
| P | Q02LI9 | CC | Involved in the import of serine and threonine into the cell, with the concomitant import of sodium (symport system) (By similarity).                                                                                                                                                                                                                         |
| P | Q02LI9 | DE | Na <sup>+</sup> /serine-threonine symporter;                                                                                                                                                                                                                                                                                                                  |
| P | Q02LI9 | DE | Na <sup>+</sup> /serine-threonine symporter;                                                                                                                                                                                                                                                                                                                  |
| P | Q02LI9 | DE | Serine/threonine transporter sstT;                                                                                                                                                                                                                                                                                                                            |
| P | Q02LI9 | DR | sodium:dicarboxylate symporter activity                                                                                                                                                                                                                                                                                                                       |
| P | Q02ME3 | CC | Part of the ABC transporter complex MetNIQ involved in methionine import                                                                                                                                                                                                                                                                                      |
| P | Q02ME3 | DE | Methionine import ATP-binding protein MetN 1;                                                                                                                                                                                                                                                                                                                 |
| P | Q02QE8 | DR | phosphonate transmembrane-transporting ATPase activity                                                                                                                                                                                                                                                                                                        |
| P | Q02QM1 | DR | phosphonate transmembrane-transporting ATPase activity                                                                                                                                                                                                                                                                                                        |
| P | Q02R79 | CC | Part of the ABC transporter complex POTABCD involved in spermidine/putrescine import                                                                                                                                                                                                                                                                          |
| P | Q02R79 | CC | Part of the ABC transporter complex POTABCD involved in spermidine/putrescine import                                                                                                                                                                                                                                                                          |
| P | Q02R79 | DE | Spermidine/putrescine import ATP-binding protein PotA;                                                                                                                                                                                                                                                                                                        |
| P | Q02R79 | DE | Spermidine/putrescine import ATP-binding protein PotA;                                                                                                                                                                                                                                                                                                        |
| P | Q02SA6 | CC | Part of the ABC transporter complex TauABC involved in taurine import                                                                                                                                                                                                                                                                                         |

|   |        |    |                                                                                                                                                                                                                                                                         |
|---|--------|----|-------------------------------------------------------------------------------------------------------------------------------------------------------------------------------------------------------------------------------------------------------------------------|
| P | Q02SA6 | DE | Taurine import ATP-binding protein TauB;                                                                                                                                                                                                                                |
| P | Q02SA6 | DR | taurine-transporting ATPase activity                                                                                                                                                                                                                                    |
| P | Q02SS7 | CC | The physiological role may be the reduction of the intracellular concentration of toxic sugars or sugar metabolites (By similarity).                                                                                                                                    |
| P | Q02SS7 | DE | Probable sugar efflux transporter;                                                                                                                                                                                                                                      |
| P | Q02UV9 | DR | sodium:dicarboxylate symporter activity                                                                                                                                                                                                                                 |
| P | Q02UV9 | DR | sodium:dicarboxylate symporter activity                                                                                                                                                                                                                                 |
| P | Q02VA9 | CC | This protein is a component of the oligopeptide permease, a binding protein-dependent transport system, it binds peptides up to five amino acids long with high affinity.                                                                                               |
| P | Q02VA9 | DE | Oligopeptide-binding protein oppA;                                                                                                                                                                                                                                      |
| P | Q02XM9 | CC | Part of the ABC transporter complex RbsABCD involved in ribose import                                                                                                                                                                                                   |
| P | Q02XM9 | DE | Ribose import ATP-binding protein RbsA;                                                                                                                                                                                                                                 |
| P | Q02Z10 | CC | Part of the ABC transporter complex PotABCD involved in spermidine/putrescine import                                                                                                                                                                                    |
| P | Q02Z10 | CC | Part of the ABC transporter complex PotABCD involved in spermidine/putrescine import                                                                                                                                                                                    |
| P | Q02Z10 | DE | Spermidine/putrescine import ATP-binding protein PotA;                                                                                                                                                                                                                  |
| P | Q02Z10 | DE | Spermidine/putrescine import ATP-binding protein PotA;                                                                                                                                                                                                                  |
| P | Q03030 | CC | Lyase and sodium transporter.                                                                                                                                                                                                                                           |
| P | Q03031 | CC | Lyase and sodium transporter.                                                                                                                                                                                                                                           |
| P | Q03032 | CC | Lyase and sodium transporter.                                                                                                                                                                                                                                           |
| P | Q03032 | DR | sodium ion transmembrane transporter activity                                                                                                                                                                                                                           |
| P | Q03218 | CC | Mitochondrial metal transporter involved in mitochondrial iron accumulation.                                                                                                                                                                                            |
| P | Q03218 | DE | Mitochondrial metal transporter 1;                                                                                                                                                                                                                                      |
| P | Q032A0 | CC | Part of the ABC transporter complex MetNIQ involved in methionine import                                                                                                                                                                                                |
| P | Q032A0 | DE | Methionine import ATP-binding protein MetN;                                                                                                                                                                                                                             |
| P | Q032D0 | DR | phosphonate transmembrane-transporting ATPase activity                                                                                                                                                                                                                  |
| P | Q03518 | CC | Also acts as a molecular scaffold for the final stage of MHC class I folding, namely the binding of peptide                                                                                                                                                             |
| P | Q03518 | CC | Expression of TAP1 is down-regulated by human Epstein-Barr virus vIL-10 protein, thereby affecting the transport of peptides into the endoplasmic reticulum and subsequent peptide loading by MHC class I molecules.                                                    |
| P | Q03518 | CC | Inhibited by human cytomegalovirus US6 glycoprotein, which binds to the luminal side of the TAP complex and inhibits peptide translocation by specifically blocking ATP-binding to TAP1 and prevents the conformational rearrangement of TAP induced by peptide binding |
| P | Q03518 | CC | Inhibited by the covalent attachment of herpes simplex virus ICP47 protein, which blocks the peptide-binding site of TAP                                                                                                                                                |
| P | Q03518 | DE | Antigen peptide transporter 1;                                                                                                                                                                                                                                          |
| P | Q03518 | DE | Peptide supply factor 1;                                                                                                                                                                                                                                                |
| P | Q03518 | DE | Peptide transporter PSF1;                                                                                                                                                                                                                                               |
| P | Q03518 | DE | Peptide transporter TAP1;                                                                                                                                                                                                                                               |
| P | Q03518 | DE | Peptide transporter involved in antigen processing 1;                                                                                                                                                                                                                   |
| P | Q03519 | CC | Also acts as a molecular scaffold for the final stage of MHC class I folding, namely the binding of peptide                                                                                                                                                             |
| P | Q03519 | CC | Inhibited by human cytomegalovirus US6 glycoprotein, which binds to the luminal side of the TAP complex and inhibits peptide translocation by specifically blocking ATP-binding to TAP1 and prevents the conformational rearrangement of TAP induced by peptide binding |
| P | Q03519 | CC | Inhibited by the covalent attachment of herpes simplex virus ICP47 protein, which blocks the peptide-binding site of TAP                                                                                                                                                |
| P | Q03519 | DE | Antigen peptide transporter 2;                                                                                                                                                                                                                                          |
| P | Q03519 | DE | Peptide supply factor 2;                                                                                                                                                                                                                                                |
| P | Q03519 | DE | Peptide transporter PSF2;                                                                                                                                                                                                                                               |
| P | Q03519 | DE | Peptide transporter TAP2;                                                                                                                                                                                                                                               |
| P | Q03519 | DE | Peptide transporter involved in antigen processing 2;                                                                                                                                                                                                                   |
| P | Q03519 | DR | peptide antigen-transporting ATPase activity                                                                                                                                                                                                                            |
| P | Q035E0 | DR | phosphonate transmembrane-transporting ATPase activity                                                                                                                                                                                                                  |
| P | Q035P5 | CC | Transport of potassium into the cell (By similarity).                                                                                                                                                                                                                   |
| P | Q035P5 | DE | Probable potassium transport system protein kup;                                                                                                                                                                                                                        |
| P | Q035P5 | DR | potassium ion transmembrane transporter activity                                                                                                                                                                                                                        |
| P | Q03614 | CC | Terminates the action of dopamine by its high affinity sodium-dependent reuptake into presynaptic terminals.                                                                                                                                                            |
| P | Q03614 | DE | Sodium-dependent dopamine transporter;                                                                                                                                                                                                                                  |
| P | Q03614 | DR | dopamine:sodium symporter activity                                                                                                                                                                                                                                      |
| P | Q03719 | CC | Pore-forming (alpha) subunit of voltage-gated rapidly inactivating A-type potassium channels                                                                                                                                                                            |

|   |        |    |                                                                                                                                                                                                                                                                                        |
|---|--------|----|----------------------------------------------------------------------------------------------------------------------------------------------------------------------------------------------------------------------------------------------------------------------------------------|
| P | Q03719 | DE | Potassium voltage-gated channel subfamily D member 1;                                                                                                                                                                                                                                  |
| P | Q03719 | DE | Voltage-gated potassium channel subunit Kv4.1;                                                                                                                                                                                                                                         |
| P | Q03719 | DR | voltage-gated potassium channel activity<br>Assuming opened or closed conformations in response to the voltage difference across the membrane, the protein forms a potassium-selective channel through which potassium ions may pass in accordance with their electrochemical gradient |
| P | Q03721 | CC | This protein mediates the voltage-dependent potassium ion permeability of excitable membranes                                                                                                                                                                                          |
| P | Q03721 | DE | Potassium voltage-gated channel subfamily C member 4;                                                                                                                                                                                                                                  |
| P | Q03721 | DE | Voltage-gated potassium channel subunit Kv3.4;                                                                                                                                                                                                                                         |
| P | Q03721 | DR | voltage-gated potassium channel activity                                                                                                                                                                                                                                               |
| P | Q03A07 | CC | Part of the ABC transporter complex MetNIQ involved in methionine import                                                                                                                                                                                                               |
| P | Q03A07 | DE | Methionine import ATP-binding protein MetN;                                                                                                                                                                                                                                            |
| P | Q03AH0 | CC | Part of the ABC transporter complex PotABCD involved in spermidine/putrescine import                                                                                                                                                                                                   |
| P | Q03AH0 | CC | Part of the ABC transporter complex PotABCD involved in spermidine/putrescine import                                                                                                                                                                                                   |
| P | Q03AH0 | DE | Spermidine/putrescine import ATP-binding protein PotA;                                                                                                                                                                                                                                 |
| P | Q03AH0 | DE | Spermidine/putrescine import ATP-binding protein PotA;                                                                                                                                                                                                                                 |
| P | Q03CA4 | CC | Part of the ABC transporter complex RbsABCD involved in ribose import                                                                                                                                                                                                                  |
| P | Q03CA4 | DE | Ribose import ATP-binding protein RbsA;                                                                                                                                                                                                                                                |
| P | Q03D26 | CC | H+-stimulated, highly selective, manganese uptake system (By similarity).                                                                                                                                                                                                              |
| P | Q03D26 | DE | Probable manganese transport protein mntH;                                                                                                                                                                                                                                             |
| P | Q03DK0 | CC | H+-stimulated, highly selective, manganese uptake system (By similarity).                                                                                                                                                                                                              |
| P | Q03DK0 | DE | Probable manganese transport protein mntH;                                                                                                                                                                                                                                             |
| P | Q03JH1 | CC | Part of the ABC transporter complex PotABCD involved in spermidine/putrescine import                                                                                                                                                                                                   |
| P | Q03JH1 | CC | Part of the ABC transporter complex PotABCD involved in spermidine/putrescine import                                                                                                                                                                                                   |
| P | Q03JH1 | DE | Spermidine/putrescine import ATP-binding protein PotA;                                                                                                                                                                                                                                 |
| P | Q03JH1 | DE | Spermidine/putrescine import ATP-binding protein PotA;                                                                                                                                                                                                                                 |
| P | Q03MC5 | CC | Involved in the import of serine and threonine into the cell, with the concomitant import of sodium (symport system) (By similarity).                                                                                                                                                  |
| P | Q03MC5 | DE | Na+/serine-threonine symporter;                                                                                                                                                                                                                                                        |
| P | Q03MC5 | DR | sodium:dicarboxylate symporter activity                                                                                                                                                                                                                                                |
| P | Q03MC5 | DR | sodium:dicarboxylate symporter activity                                                                                                                                                                                                                                                |
| P | Q03P57 | CC | Part of the ABC transporter complex MetNIQ involved in methionine import                                                                                                                                                                                                               |
| P | Q03P57 | DE | Methionine import ATP-binding protein MetN;                                                                                                                                                                                                                                            |
| P | Q03PF2 | CC | Part of the ABC transporter complex PotABCD involved in spermidine/putrescine import                                                                                                                                                                                                   |
| P | Q03PF2 | CC | Part of the ABC transporter complex PotABCD involved in spermidine/putrescine import                                                                                                                                                                                                   |
| P | Q03PF2 | DE | Spermidine/putrescine import ATP-binding protein PotA;                                                                                                                                                                                                                                 |
| P | Q03PF2 | DE | Spermidine/putrescine import ATP-binding protein PotA;                                                                                                                                                                                                                                 |
| P | Q03S07 | CC | Transport of potassium into the cell (By similarity).                                                                                                                                                                                                                                  |
| P | Q03S07 | DE | Probable potassium transport system protein kup;                                                                                                                                                                                                                                       |
| P | Q03S07 | DR | potassium ion transmembrane transporter activity                                                                                                                                                                                                                                       |
| P | Q03TH5 | CC | H+-stimulated, highly selective, manganese uptake system (By similarity).                                                                                                                                                                                                              |
| P | Q03TH5 | DE | Probable manganese transport protein mntH;                                                                                                                                                                                                                                             |
| P | Q03XG1 | CC | Transport of potassium into the cell (By similarity).                                                                                                                                                                                                                                  |
| P | Q03XG1 | DE | Probable potassium transport system protein kup;                                                                                                                                                                                                                                       |
| P | Q03XG1 | DR | potassium ion transmembrane transporter activity                                                                                                                                                                                                                                       |
| P | Q03Z27 | CC | Part of the ABC transporter complex MetNIQ involved in methionine import                                                                                                                                                                                                               |
| P | Q03Z27 | DE | Methionine import ATP-binding protein MetN;                                                                                                                                                                                                                                            |
| P | Q03ZQ0 | CC | Part of the ABC transporter complex PotABCD involved in spermidine/putrescine import                                                                                                                                                                                                   |
| P | Q03ZQ0 | CC | Part of the ABC transporter complex PotABCD involved in spermidine/putrescine import                                                                                                                                                                                                   |
| P | Q03ZQ0 | DE | Spermidine/putrescine import ATP-binding protein PotA;                                                                                                                                                                                                                                 |
| P | Q03ZQ0 | DE | Spermidine/putrescine import ATP-binding protein PotA;                                                                                                                                                                                                                                 |
| P | Q04121 | CC | Endosomal/prevacuolar electroneutral Na+/H+ exchanger which mediates intracellular sequestration of Na+ cations, regulates vacuolar pH and contributes to osmotolerance following sudden exposure to hyperosmotic media                                                                |
| P | Q04121 | DE | Endosomal/prevacuolar Na+/H+ exchanger;                                                                                                                                                                                                                                                |
| P | Q04121 | DE | Endosomal/prevacuolar sodium/hydrogen exchanger;                                                                                                                                                                                                                                       |
| P | Q04121 | DR | sodium:hydrogen antiporter activity                                                                                                                                                                                                                                                    |
| P | Q042G7 | CC | Part of the ABC transporter complex PotABCD involved in spermidine/putrescine import                                                                                                                                                                                                   |
| P | Q042G7 | CC | Part of the ABC transporter complex PotABCD involved in spermidine/putrescine import                                                                                                                                                                                                   |
| P | Q042G7 | DE | Spermidine/putrescine import ATP-binding protein PotA;                                                                                                                                                                                                                                 |
| P | Q042G7 | DE | Spermidine/putrescine import ATP-binding protein PotA;                                                                                                                                                                                                                                 |
| P | Q043Y8 | CC | Part of the ABC transporter complex MetNIQ involved in methionine import                                                                                                                                                                                                               |
| P | Q043Y8 | DE | Methionine import ATP-binding protein MetN;                                                                                                                                                                                                                                            |

|   |        |    |                                                                                                                                                        |
|---|--------|----|--------------------------------------------------------------------------------------------------------------------------------------------------------|
| P | Q04646 | CC | May be involved in forming the receptor site for cardiac glycoside binding or may modulate the transport function of the sodium ATPase.                |
| P | Q04646 | DE | Na <sup>+</sup> /K <sup>+</sup> ATPase subunit gamma;                                                                                                  |
| P | Q04646 | DE | Na <sup>+</sup> /K <sup>+</sup> ATPase subunit gamma;                                                                                                  |
| P | Q04646 | DE | Sodium pump gamma chain;                                                                                                                               |
| P | Q04646 | DE | Sodium/potassium-transporting ATPase subunit gamma;                                                                                                    |
| P | Q04646 | DE | Sodium/potassium-transporting ATPase subunit gamma;                                                                                                    |
| P | Q04656 | CC | May supply copper to copper-requiring proteins within the secretory pathway, when localized in the trans-Golgi network                                 |
| P | Q04656 | CC | Under conditions of elevated extracellular copper, it relocalized to the plasma membrane where it functions in the efflux of copper from cells.        |
| P | Q04656 | DE | Copper pump 1;                                                                                                                                         |
| P | Q04656 | DE | Copper-transporting ATPase 1;                                                                                                                          |
| P | Q04656 | DR | copper-exporting ATPase activity                                                                                                                       |
| P | Q04656 | DR | superoxide dismutase copper chaperone activity                                                                                                         |
| P | Q04671 | CC | Could be involved in the transport of tyrosine, the precursor to melanin synthesis, within the melanocyte                                              |
| P | Q04671 | DR | L-tyrosine transmembrane transporter activity                                                                                                          |
| P | Q046Q7 | CC | Transport of potassium into the cell (By similarity).                                                                                                  |
| P | Q046Q7 | DE | Probable potassium transport system protein kup;                                                                                                       |
| P | Q046Q7 | DR | potassium ion transmembrane transporter activity                                                                                                       |
| P | Q04895 | CC | Transport of allantoin.                                                                                                                                |
| P | Q04895 | DE | Allantoin permease;                                                                                                                                    |
| P | Q04895 | DE | Allantoin transport protein;                                                                                                                           |
| P | Q04895 | DR | allantoin uptake transmembrane transporter activity                                                                                                    |
| P | Q04B25 | CC | Part of the ABC transporter complex MetNIQ involved in methionine import                                                                               |
| P | Q04B25 | DE | Methionine import ATP-binding protein MetN;                                                                                                            |
| P | Q04BG2 | CC | Part of the ABC transporter complex PotABCD involved in spermidine/putrescine import                                                                   |
| P | Q04BG2 | CC | Part of the ABC transporter complex PotABCD involved in spermidine/putrescine import                                                                   |
| P | Q04BG2 | DE | Spermidine/putrescine import ATP-binding protein PotA;                                                                                                 |
| P | Q04BG2 | DE | Spermidine/putrescine import ATP-binding protein PotA;                                                                                                 |
| P | Q04CF3 | CC | Transport of potassium into the cell (By similarity).                                                                                                  |
| P | Q04CF3 | DE | Probable potassium transport system protein kup;                                                                                                       |
| P | Q04CF3 | DR | potassium ion transmembrane transporter activity                                                                                                       |
| P | Q04CG8 | DR | phosphonate transmembrane-transporting ATPase activity                                                                                                 |
| P | Q04DA7 | CC | Part of the ABC transporter complex MetNIQ involved in methionine import                                                                               |
| P | Q04DA7 | DE | Methionine import ATP-binding protein MetN 2;                                                                                                          |
| P | Q04F14 | CC | Part of the ABC transporter complex MetNIQ involved in methionine import                                                                               |
| P | Q04F14 | DE | Methionine import ATP-binding protein MetN 1;                                                                                                          |
| P | Q05085 | CC | Displays an auxin transport facilitation inhibited by high nitrate concentration                                                                       |
| P | Q05085 | CC | Dual affinity nitrate transporter                                                                                                                      |
| P | Q05085 | CC | Involved in proton- dependent nitrate uptake and in the regulation of the nitrate transporter NRT2.1                                                   |
| P | Q05085 | CC | Required to prevent auxin accumulation in preemerged lateral root primordia and young lateral roots when external nitrate concentration is low or null |
| P | Q05085 | DE | Nitrate transporter 1.1;                                                                                                                               |
| P | Q05085 | DE | Nitrate/chlorate transporter;                                                                                                                          |
| P | Q05085 | DE | Nitrate/chlorate transporter;                                                                                                                          |
| P | Q05085 | DR | nitrate transmembrane transporter activity                                                                                                             |
| P | Q05181 | DE | Phthalate transporter;                                                                                                                                 |
| P | Q05595 | DR | cobalt ion transmembrane transporter activity                                                                                                          |
| P | Q05598 | DR | cobalt ion transmembrane transporter activity                                                                                                          |
| P | Q058N4 | CC | High-affinity magnesium transporter that mediates the influx of magnesium in chloroplast                                                               |
| P | Q058N4 | DE | Magnesium Transporter 10;                                                                                                                              |
| P | Q058N4 | DE | Magnesium transporter MRS2-11, chloroplastic;                                                                                                          |
| P | Q058N4 | DR | magnesium ion transmembrane transporter activity                                                                                                       |
| P | Q05998 | CC | Responsible for intake of thiamine.                                                                                                                    |
| P | Q05998 | DE | Thiamine transporter;                                                                                                                                  |
| P | Q05998 | DR | thiamine transmembrane transporter activity                                                                                                            |
| P | Q05BQ3 | DR | glucose transmembrane transporter activity                                                                                                             |
| P | Q06222 | CC | Facilitative glucose transporter.                                                                                                                      |
| P | Q06222 | DE | Glucose transporter 2A;                                                                                                                                |
| P | Q06495 | CC | May be involved in actively transporting phosphate into cells via Na <sup>+</sup> cotransport in the renal brush border membrane                       |



|   |        |    |                                                                                                                                                                                  |
|---|--------|----|----------------------------------------------------------------------------------------------------------------------------------------------------------------------------------|
| P | Q06495 | CC | May be involved in actively transporting phosphate into cells via Na <sup>+</sup> cotransport in the renal brush border membrane                                                 |
| P | Q06495 | DE | Na <sup>+</sup> -dependent phosphate cotransporter 2A;                                                                                                                           |
| P | Q06495 | DE | Na <sup>+</sup> -dependent phosphate cotransporter 2A;                                                                                                                           |
| P | Q06495 | DE | Na <sup>+</sup> /Pi cotransporter 2A;                                                                                                                                            |
| P | Q06495 | DE | Sodium-dependent phosphate transport protein 2A;                                                                                                                                 |
| P | Q06495 | DE | Sodium-dependent phosphate transport protein 2A;                                                                                                                                 |
| P | Q06495 | DE | Sodium-phosphate transport protein 2A;                                                                                                                                           |
| P | Q06495 | DE | Sodium/phosphate cotransporter 2A;                                                                                                                                               |
| P | Q06495 | DE | Sodium/phosphate cotransporter 2A;                                                                                                                                               |
| P | Q06495 | DR | sodium-dependent phosphate transmembrane transporter activity                                                                                                                    |
| P | Q06495 | DR | sodium-dependent phosphate transmembrane transporter activity                                                                                                                    |
| P | Q06496 | CC | May be involved in actively transporting phosphate into cells via Na <sup>+</sup> cotransport in the renal brush border membrane                                                 |
| P | Q06496 | CC | May be involved in actively transporting phosphate into cells via Na <sup>+</sup> cotransport in the renal brush border membrane                                                 |
| P | Q06496 | DE | Na <sup>+</sup> -dependent phosphate cotransporter 2A;                                                                                                                           |
| P | Q06496 | DE | Na <sup>+</sup> -dependent phosphate cotransporter 2A;                                                                                                                           |
| P | Q06496 | DE | Na <sup>+</sup> /Pi cotransporter 2A;                                                                                                                                            |
| P | Q06496 | DE | Sodium-dependent phosphate transport protein 2A;                                                                                                                                 |
| P | Q06496 | DE | Sodium-dependent phosphate transport protein 2A;                                                                                                                                 |
| P | Q06496 | DE | Sodium-phosphate transport protein 2A;                                                                                                                                           |
| P | Q06496 | DE | Sodium/phosphate cotransporter 2A;                                                                                                                                               |
| P | Q06496 | DE | Sodium/phosphate cotransporter 2A;                                                                                                                                               |
| P | Q06496 | DR | sodium-dependent phosphate transmembrane transporter activity                                                                                                                    |
| P | Q06496 | DR | sodium-dependent phosphate transmembrane transporter activity                                                                                                                    |
| P | Q06593 | DE | Oligopeptide transporter 2;                                                                                                                                                      |
| P | Q06593 | DR | oligopeptide transporter activity                                                                                                                                                |
| P | Q06598 | DR | arsenite transmembrane transporter activity                                                                                                                                      |
| P | Q06611 | CC | Essential for the water permeability of the plasma membrane and for the morphology of the root system                                                                            |
| P | Q06611 | CC | Water channel required to facilitate the transport of water across cell membrane                                                                                                 |
| P | Q06611 | DR | water channel activity                                                                                                                                                           |
| P | Q06686 | CC | Required for high affinity copper (probably reduced Cu I) transport into the cell.                                                                                               |
| P | Q06686 | DE | Copper transport protein CTR3;                                                                                                                                                   |
| P | Q06686 | DE | Copper transporter 3;                                                                                                                                                            |
| P | Q06686 | DR | copper uptake transmembrane transporter activity                                                                                                                                 |
| P | Q06700 | CC | Decarboxylase subunit of the primary sodium pump glutaconyl-CoA decarboxylase (GCD).                                                                                             |
| P | Q07307 | CC | Uric acid-xanthine transporter.                                                                                                                                                  |
| P | Q07307 | DE | Uric acid-xanthine permease;                                                                                                                                                     |
| P | Q07307 | DR | urate transmembrane transporter activity                                                                                                                                         |
| P | Q07647 | CC | Facilitative glucose transporter                                                                                                                                                 |
| P | Q07647 | CC | Probably a neuronal glucose transporter.                                                                                                                                         |
| P | Q07647 | DE | Glucose transporter type 3, brain;                                                                                                                                               |
| P | Q07647 | DE | Solute carrier family 2, facilitated glucose transporter member 3;                                                                                                               |
| P | Q07733 | DE | Oligopeptide transport ATP-binding protein OppD;                                                                                                                                 |
| P | Q07782 | CC | Sodium/sulfate cotransporter that mediates sulfate reabsorption in the kidney.                                                                                                   |
| P | Q07782 | CC | Sodium/sulfate cotransporter that mediates sulfate reabsorption in the kidney.                                                                                                   |
| P | Q07782 | DE | Na <sup>+</sup> /sulfate cotransporter;                                                                                                                                          |
| P | Q07782 | DE | Na <sup>+</sup> /sulfate cotransporter;                                                                                                                                          |
| P | Q07782 | DE | Renal sodium/sulfate cotransporter;                                                                                                                                              |
| P | Q07782 | DE | Renal sodium/sulfate cotransporter;                                                                                                                                              |
| P | Q07782 | DR | sodium:sulfate symporter activity                                                                                                                                                |
| P | Q07782 | DR | sodium:sulfate symporter activity                                                                                                                                                |
| P | Q07824 | CC | Catalyzes polyamine uptake at alkaline pH and excretion at acidic pH                                                                                                             |
| P | Q07824 | CC | Cell membrane polyamine/proton antiporter, involved in the detoxification of excess polyamines in the cytoplasm                                                                  |
| P | Q07824 | CC | Recognizes spermidine, spermine and putrescine, the polyamine analogs methylglyoxal bis(guanylhydrazone) (MGBG) and paraquat, the antimalarial drug quinidine, and cycloheximide |
| P | Q07824 | CC | Recognizes spermidine, spermine and putrescine, the polyamine analogs methylglyoxal bis(guanylhydrazone) (MGBG) and paraquat, the antimalarial drug quinidine, and cycloheximide |
| P | Q07824 | DE | Polyamine transporter 1;                                                                                                                                                         |

|   |        |    |                                                                                                                                                                                                                                                                           |
|---|--------|----|---------------------------------------------------------------------------------------------------------------------------------------------------------------------------------------------------------------------------------------------------------------------------|
| P | Q07YY4 | CC | Na <sup>+</sup> /H <sup>+</sup> antiporter that extrudes sodium in exchange for external protons (By similarity)                                                                                                                                                          |
| P | Q07YY4 | DE | Na <sup>+</sup> /H <sup>+</sup> antiporter nhaA;                                                                                                                                                                                                                          |
| P | Q07YY4 | DE | Sodium/proton antiporter nhaA;                                                                                                                                                                                                                                            |
| P | Q07ZL7 | CC | Involved in the import of serine and threonine into the cell, with the concomitant import of sodium (symport system) (By similarity).                                                                                                                                     |
| P | Q07ZL7 | CC | Involved in the import of serine and threonine into the cell, with the concomitant import of sodium (symport system) (By similarity).                                                                                                                                     |
| P | Q07ZL7 | DE | Na <sup>+</sup> /serine-threonine symporter;                                                                                                                                                                                                                              |
| P | Q07ZL7 | DE | Na <sup>+</sup> /serine-threonine symporter;                                                                                                                                                                                                                              |
| P | Q07ZL7 | DE | Serine/threonine transporter sstT;                                                                                                                                                                                                                                        |
| P | Q07ZL7 | DR | sodium:dicarboxylate symporter activity                                                                                                                                                                                                                                   |
| P | Q080S4 | DE | Lipoprotein-releasing system ATP-binding protein LolD;                                                                                                                                                                                                                    |
| P | Q080S4 | DR | lipoprotein transporter activity                                                                                                                                                                                                                                          |
| P | Q08299 | CC | Involved in the transport of siderophore enterobactin and so has a role in iron homeostasis.                                                                                                                                                                              |
| P | Q08299 | DE | Enterobactin permease;                                                                                                                                                                                                                                                    |
| P | Q08357 | CC | In vitro, sodium-dependent phosphate uptake is not significantly affected by acidic and alkaline conditions, however sodium-independent phosphate uptake occurs at acidic conditions                                                                                      |
| P | Q08357 | CC | Sodium-phosphate symporter which seems to play a fundamental housekeeping role in phosphate transport by absorbing phosphate from interstitial fluid for normal cellular functions such as cellular metabolism, signal transduction, and nucleic acid and lipid synthesis |
| P | Q08357 | DE | Phosphate transporter 2;                                                                                                                                                                                                                                                  |
| P | Q08357 | DE | Sodium-dependent phosphate transporter 2;                                                                                                                                                                                                                                 |
| P | Q08357 | DR | inorganic phosphate transmembrane transporter activity                                                                                                                                                                                                                    |
| P | Q08357 | DR | sodium-dependent phosphate transmembrane transporter activity                                                                                                                                                                                                             |
| P | Q08357 | DR | sodium:phosphate symporter activity                                                                                                                                                                                                                                       |
| P | Q083H3 | CC | Na <sup>+</sup> /H <sup>+</sup> antiporter that extrudes sodium in exchange for external protons (By similarity)                                                                                                                                                          |
| P | Q083H3 | DE | Na <sup>+</sup> /H <sup>+</sup> antiporter nhaB;                                                                                                                                                                                                                          |
| P | Q083H3 | DE | Sodium/proton antiporter nhaB;                                                                                                                                                                                                                                            |
| P | Q083H3 | DR | sodium:hydrogen antiporter activity                                                                                                                                                                                                                                       |
| P | Q08460 | CC | Potassium channel activated by both membrane depolarization or increase in cytosolic Ca <sup>2+</sup> that mediates export of K <sup>+</sup>                                                                                                                              |
| P | Q08460 | DR | voltage-gated potassium channel activity                                                                                                                                                                                                                                  |
| P | Q084V3 | CC | Part of the ABC transporter complex PstSACB involved in phosphate import                                                                                                                                                                                                  |
| P | Q084V3 | DE | ABC phosphate transporter;                                                                                                                                                                                                                                                |
| P | Q084V3 | DE | Phosphate import ATP-binding protein PstB;                                                                                                                                                                                                                                |
| P | Q084V3 | DE | Phosphate-transporting ATPase;                                                                                                                                                                                                                                            |
| P | Q084V3 | DR | inorganic phosphate transmembrane transporter activity                                                                                                                                                                                                                    |
| P | Q084V3 | DR | phosphate transmembrane-transporting ATPase activity                                                                                                                                                                                                                      |
| P | Q08579 | CC | It is possible that the primary function is the uptake of closely related compounds and that thiamine transport is a secondary activity of these proteins.                                                                                                                |
| P | Q08579 | CC | Low affinity thiamine transporter responsible for intake of thiamine                                                                                                                                                                                                      |
| P | Q08579 | DE | Thiamine transporter THI72;                                                                                                                                                                                                                                               |
| P | Q08733 | CC | Water channel required to facilitate the transport of water across cell membrane                                                                                                                                                                                          |
| P | Q08733 | DR | water channel activity                                                                                                                                                                                                                                                    |
| P | Q08832 | CC | GABA, an inhibitory neurotransmitter, mediates neuronal inhibition by binding to the GABA receptor and opening an integral chloride channel                                                                                                                               |
| P | Q08832 | DR | chloride channel activity                                                                                                                                                                                                                                                 |
| P | Q08929 | CC | Involved in active uptake of glycerol driven by electrogenic proton symport.                                                                                                                                                                                              |
| P | Q08929 | DE | Glycerol uptake protein 2;                                                                                                                                                                                                                                                |
| P | Q08970 | CC | Mitochondrial metal transporter involved in mitochondrial iron accumulation.                                                                                                                                                                                              |
| P | Q08970 | DE | Mitochondrial metal transporter 2;                                                                                                                                                                                                                                        |
| P | Q08986 | CC | High-affinity S-adenosylmethionine permease, required for utilization of S-adenosylmethionine as a sulfur source.                                                                                                                                                         |
| P | Q08986 | DE | S-adenosylmethionine metabolism protein 3;                                                                                                                                                                                                                                |
| P | Q08986 | DE | S-adenosylmethionine permease SAM3;                                                                                                                                                                                                                                       |
| P | Q08986 | DR | S-adenosylmethionine transmembrane transporter activity                                                                                                                                                                                                                   |
| P | Q089M3 | CC | Part of the ABC transporter complex CcmAB involved in the biogenesis of c-type cytochromes; once thought to export heme, this seems not to be the case, but its exact role is uncertain                                                                                   |
| P | Q089M3 | DE | Heme exporter protein A;                                                                                                                                                                                                                                                  |
| P | Q089M3 | DR | heme-transporting ATPase activity                                                                                                                                                                                                                                         |
| P | Q09188 | CC | Catalyzes the exchange of ADP and ATP across the mitochondrial inner membrane                                                                                                                                                                                             |

|   |        |    |                                                                                                                                                                                                                                                                       |
|---|--------|----|-----------------------------------------------------------------------------------------------------------------------------------------------------------------------------------------------------------------------------------------------------------------------|
| P | Q09188 | CC | Catalyzes the exchange of ADP and ATP across the mitochondrial inner membrane                                                                                                                                                                                         |
| P | Q09188 | DE | ADP/ATP carrier protein;                                                                                                                                                                                                                                              |
| P | Q09188 | DE | ADP/ATP translocase;                                                                                                                                                                                                                                                  |
| P | Q09188 | DE | ADP/ATP translocase;                                                                                                                                                                                                                                                  |
| P | Q09188 | DR | ATP:ADP antiporter activity                                                                                                                                                                                                                                           |
| P | Q09188 | DR | ATP:ADP antiporter activity                                                                                                                                                                                                                                           |
| P | Q09274 | DR | sodium channel activity<br>Assuming opened or closed conformations in response to the voltage difference across the membrane, the protein forms a potassium-selective channel through which potassium ions may pass in accordance with their electrochemical gradient |
| P | Q09470 | CC | Mediates the voltage-dependent potassium ion permeability of excitable membranes                                                                                                                                                                                      |
| P | Q09470 | DE | Potassium voltage-gated channel subfamily A member 1;                                                                                                                                                                                                                 |
| P | Q09470 | DE | Voltage-gated K <sup>+</sup> channel HuK1;                                                                                                                                                                                                                            |
| P | Q09470 | DE | Voltage-gated potassium channel HBK1;                                                                                                                                                                                                                                 |
| P | Q09470 | DE | Voltage-gated potassium channel subunit Kv1.1;                                                                                                                                                                                                                        |
| P | Q09470 | DR | delayed rectifier potassium channel activity                                                                                                                                                                                                                          |
| P | Q09470 | DR | potassium ion transmembrane transporter activity                                                                                                                                                                                                                      |
| P | Q09573 | DE | Sodium/chloride cotransporter 3;                                                                                                                                                                                                                                      |
| P | Q0A808 | CC | Part of the ABC transporter complex CcmAB involved in the biogenesis of c-type cytochromes; once thought to export heme, this seems not to be the case, but its exact role is uncertain                                                                               |
| P | Q0A808 | DE | Heme exporter protein A;                                                                                                                                                                                                                                              |
| P | Q0A808 | DR | heme-transporting ATPase activity                                                                                                                                                                                                                                     |
| P | Q0A8P9 | DE | Lipoprotein-releasing system ATP-binding protein LolD;                                                                                                                                                                                                                |
| P | Q0A8P9 | DR | lipoprotein transporter activity                                                                                                                                                                                                                                      |
| P | Q0A9E2 | CC | Part of the ABC transporter complex ZnuABC involved in zinc import                                                                                                                                                                                                    |
| P | Q0A9E2 | DE | Zinc import ATP-binding protein ZnuC;                                                                                                                                                                                                                                 |
| P | Q0A9E2 | DR | zinc transporting ATPase activity                                                                                                                                                                                                                                     |
| P | Q0A9K1 | CC | Part of the ABC transporter complex PstSACB involved in phosphate import                                                                                                                                                                                              |
| P | Q0A9K1 | DE | ABC phosphate transporter;                                                                                                                                                                                                                                            |
| P | Q0A9K1 | DE | Phosphate import ATP-binding protein PstB;                                                                                                                                                                                                                            |
| P | Q0A9K1 | DE | Phosphate-transporting ATPase;                                                                                                                                                                                                                                        |
| P | Q0A9K1 | DR | inorganic phosphate transmembrane transporter activity                                                                                                                                                                                                                |
| P | Q0A9K1 | DR | phosphate transmembrane-transporting ATPase activity                                                                                                                                                                                                                  |
| P | Q0AGF4 | CC | Part of the ABC transporter complex PotABCD involved in spermidine/putrescine import                                                                                                                                                                                  |
| P | Q0AGF4 | CC | Part of the ABC transporter complex PotABCD involved in spermidine/putrescine import                                                                                                                                                                                  |
| P | Q0AGF4 | DE | Spermidine/putrescine import ATP-binding protein PotA;                                                                                                                                                                                                                |
| P | Q0AGF4 | DE | Spermidine/putrescine import ATP-binding protein PotA;                                                                                                                                                                                                                |
| P | Q0AIM8 | CC | Transport of potassium into the cell (By similarity).                                                                                                                                                                                                                 |
| P | Q0AIM8 | DE | Probable potassium transport system protein kup;                                                                                                                                                                                                                      |
| P | Q0AIM8 | DR | potassium ion transmembrane transporter activity                                                                                                                                                                                                                      |
| P | Q0AKQ2 | CC | Part of the ABC transporter complex CcmAB involved in the biogenesis of c-type cytochromes; once thought to export heme, this seems not to be the case, but its exact role is uncertain                                                                               |
| P | Q0AKQ2 | DE | Heme exporter protein A;                                                                                                                                                                                                                                              |
| P | Q0AKQ2 | DR | heme-transporting ATPase activity                                                                                                                                                                                                                                     |
| P | Q0AM65 | CC | Na <sup>+</sup> /H <sup>+</sup> antiporter that excludes sodium in exchange for external protons (By similarity)                                                                                                                                                      |
| P | Q0AM65 | DE | Na <sup>+</sup> /H <sup>+</sup> antiporter nhaA;                                                                                                                                                                                                                      |
| P | Q0AM65 | DE | Sodium/proton antiporter nhaA;                                                                                                                                                                                                                                        |
| P | Q0APW8 | DE | Lipoprotein-releasing system ATP-binding protein LolD;                                                                                                                                                                                                                |
| P | Q0APW8 | DR | lipoprotein transporter activity                                                                                                                                                                                                                                      |
| P | Q0ASG3 | CC | Part of the ABC transporter complex PstSACB involved in phosphate import                                                                                                                                                                                              |
| P | Q0ASG3 | DE | ABC phosphate transporter;                                                                                                                                                                                                                                            |
| P | Q0ASG3 | DE | Phosphate import ATP-binding protein PstB;                                                                                                                                                                                                                            |
| P | Q0ASG3 | DE | Phosphate-transporting ATPase;                                                                                                                                                                                                                                        |
| P | Q0ASG3 | DR | inorganic phosphate transmembrane transporter activity                                                                                                                                                                                                                |
| P | Q0ASG3 | DR | phosphate transmembrane-transporting ATPase activity                                                                                                                                                                                                                  |
| P | Q0ASQ1 | DR | phosphonate transmembrane-transporting ATPase activity                                                                                                                                                                                                                |
| P | Q0AU85 | CC | Part of the ABC transporter complex MetNIQ involved in methionine import                                                                                                                                                                                              |
| P | Q0AU85 | DE | Methionine import ATP-binding protein MetN;                                                                                                                                                                                                                           |
| P | Q0BPL2 | CC | Transport of potassium into the cell (By similarity).                                                                                                                                                                                                                 |
| P | Q0BPL2 | DE | Probable potassium transport system protein kup;                                                                                                                                                                                                                      |
| P | Q0BPL2 | DR | potassium ion transmembrane transporter activity                                                                                                                                                                                                                      |
| P | Q0BQ80 | DR | molybdate transmembrane-transporting ATPase activity                                                                                                                                                                                                                  |
| P | Q0BSM2 | DE | Lipoprotein-releasing system ATP-binding protein LolD;                                                                                                                                                                                                                |

|   |        |    |                                                                                                                                                                                                            |
|---|--------|----|------------------------------------------------------------------------------------------------------------------------------------------------------------------------------------------------------------|
| P | Q0BSM2 | DR | lipoprotein transporter activity                                                                                                                                                                           |
| P | Q0BSV4 | CC | Na <sup>+</sup> /H <sup>+</sup> antiporter that extrudes sodium in exchange for external protons (By similarity)                                                                                           |
| P | Q0BSV4 | DE | Na <sup>+</sup> /H <sup>+</sup> antiporter nhaA;                                                                                                                                                           |
| P | Q0BSV4 | DE | Sodium/proton antiporter nhaA;                                                                                                                                                                             |
| P | Q0BTP1 | CC | Part of the ABC transporter complex PstSACB involved in phosphate import                                                                                                                                   |
| P | Q0BTP1 | DE | ABC phosphate transporter;                                                                                                                                                                                 |
| P | Q0BTP1 | DE | Phosphate import ATP-binding protein PstB;                                                                                                                                                                 |
| P | Q0BTP1 | DE | Phosphate-transporting ATPase;                                                                                                                                                                             |
| P | Q0BTP1 | DR | inorganic phosphate transmembrane transporter activity                                                                                                                                                     |
| P | Q0BTP1 | DR | phosphate transmembrane-transporting ATPase activity                                                                                                                                                       |
| P | Q0BV49 | CC | Part of the ABC transporter complex CcmAB involved in the biogenesis of c-type cytochromes; once thought to export heme, this seems not to be the case, but its exact role is uncertain                    |
| P | Q0BV49 | DE | Heme exporter protein A;                                                                                                                                                                                   |
| P | Q0BV49 | DR | heme-transporting ATPase activity                                                                                                                                                                          |
| P | Q0BVS2 | CC | One of the components of the high-affinity ATP-driven potassium transport (or KDP) system, which catalyzes the hydrolysis of ATP coupled with the exchange of hydrogen and potassium ions (By similarity). |
| P | Q0BVS2 | DE | Potassium-binding and translocating subunit A;                                                                                                                                                             |
| P | Q0BVS2 | DE | Potassium-translocating ATPase A chain;                                                                                                                                                                    |
| P | Q0BVS2 | DE | Potassium-transporting ATPase A chain;                                                                                                                                                                     |
| P | Q0BVS2 | DR | potassium-transporting ATPase activity                                                                                                                                                                     |
| P | Q0BW71 | DR | sodium:dicarboxylate symporter activity                                                                                                                                                                    |
| P | Q0BW85 | CC | H <sup>+</sup> -stimulated, highly selective, manganese uptake system (By similarity).                                                                                                                     |
| P | Q0BW85 | DE | Probable manganese transport protein mntH;                                                                                                                                                                 |
| P | Q0BWF7 | CC | Part of the ABC transporter complex CcmAB involved in the biogenesis of c-type cytochromes; once thought to export heme, this seems not to be the case, but its exact role is uncertain                    |
| P | Q0BWF7 | DE | Heme exporter protein A;                                                                                                                                                                                   |
| P | Q0BWF7 | DR | heme-transporting ATPase activity                                                                                                                                                                          |
| P | Q0BZD8 | DR | phosphonate transmembrane-transporting ATPase activity                                                                                                                                                     |
| P | Q0C0L5 | CC | Part of the ABC transporter complex PstSACB involved in phosphate import                                                                                                                                   |
| P | Q0C0L5 | DE | ABC phosphate transporter;                                                                                                                                                                                 |
| P | Q0C0L5 | DE | Phosphate import ATP-binding protein PstB;                                                                                                                                                                 |
| P | Q0C0L5 | DE | Phosphate-transporting ATPase;                                                                                                                                                                             |
| P | Q0C0L5 | DR | inorganic phosphate transmembrane transporter activity                                                                                                                                                     |
| P | Q0C0L5 | DR | phosphate transmembrane-transporting ATPase activity                                                                                                                                                       |
| P | Q0C1C3 | DE | Lipoprotein-releasing system ATP-binding protein LolD;                                                                                                                                                     |
| P | Q0C1C3 | DR | lipoprotein transporter activity                                                                                                                                                                           |
| P | Q0D2K0 | CC | Can also transport other divalent cations such as Ba(2+), Mn(2+), Sr(2+) and Co(2+) but to a much less extent than Mg <sup>2+</sup> (By similarity)                                                        |
| P | Q0D2K0 | DE | Magnesium transporter NIPA4;                                                                                                                                                                               |
| P | Q0D9S3 | CC | Seems to act as an high-affinity sodium transporter, which mediates increased sodium uptake in roots under potassium deficiency and contributes to sodium accumulation and salt toxicity                   |
| P | Q0D9S3 | CC | Seems to be involved in regulation of K <sup>+</sup> /Na <sup>+</sup> homeostasis                                                                                                                          |
| P | Q0D9S3 | DR | potassium ion transmembrane transporter activity                                                                                                                                                           |
| P | Q0DK16 | CC | Aquaporins facilitate the transport of water and small neutral solutes across cell membranes (By similarity).                                                                                              |
| P | Q0I2G0 | CC | Part of the ABC transporter complex CcmAB involved in the biogenesis of c-type cytochromes; once thought to export heme, this seems not to be the case, but its exact role is uncertain                    |
| P | Q0I2G0 | DE | Heme exporter protein A;                                                                                                                                                                                   |
| P | Q0I2G0 | DR | heme-transporting ATPase activity                                                                                                                                                                          |
| P | Q0I348 | CC | Part of the ABC transporter complex XylFGH involved in xylose import                                                                                                                                       |
| P | Q0I348 | DE | Xylose import ATP-binding protein XylG;                                                                                                                                                                    |
| P | Q0I354 | CC | Part of the ABC transporter complex ThiBPQ involved in thiamine import                                                                                                                                     |
| P | Q0I354 | DE | Thiamine import ATP-binding protein ThiQ;                                                                                                                                                                  |
| P | Q0I3A2 | CC | Na <sup>+</sup> /H <sup>+</sup> antiporter that extrudes sodium in exchange for external protons (By similarity)                                                                                           |
| P | Q0I3A2 | DE | Na <sup>+</sup> /H <sup>+</sup> antiporter nhaA;                                                                                                                                                           |
| P | Q0I3A2 | DE | Sodium/proton antiporter nhaA;                                                                                                                                                                             |
| P | Q0I3C2 | DE | Lipoprotein-releasing system ATP-binding protein LolD;                                                                                                                                                     |
| P | Q0I3C2 | DR | lipoprotein transporter activity                                                                                                                                                                           |
| P | Q0I3Y9 | CC | Part of the ABC transporter complex FolABCD involved in                                                                                                                                                    |
| P | Q0I3Y9 | CC | Part of the ABC transporter complex FolABCD involved in                                                                                                                                                    |

|   |        |    |                                                                                                                                                                                                            |
|---|--------|----|------------------------------------------------------------------------------------------------------------------------------------------------------------------------------------------------------------|
| P | Q0I3Y9 | DE | Spermidine/putrescine import ATP-binding protein PotA;                                                                                                                                                     |
| P | Q0I3Y9 | DE | Spermidine/putrescine import ATP-binding protein PotA;                                                                                                                                                     |
| P | Q0I455 | CC | Involved in the import of serine and threonine into the cell, with the concomitant import of sodium (symport system) (By similarity).                                                                      |
| P | Q0I455 | CC | Involved in the import of serine and threonine into the cell, with the concomitant import of sodium (symport system) (By similarity).                                                                      |
| P | Q0I455 | DE | Na <sup>+</sup> /serine-threonine symporter;                                                                                                                                                               |
| P | Q0I455 | DE | Na <sup>+</sup> /serine-threonine symporter;                                                                                                                                                               |
| P | Q0I455 | DE | Serine/threonine transporter sstT;                                                                                                                                                                         |
| P | Q0I455 | DR | sodium:dicarboxylate symporter activity                                                                                                                                                                    |
| P | Q0I4A9 | CC | Part of the ABC transporter complex ZnuABC involved in zinc import                                                                                                                                         |
| P | Q0I4A9 | DE | Zinc import ATP-binding protein ZnuC;                                                                                                                                                                      |
| P | Q0I4A9 | DR | zinc transporting ATPase activity                                                                                                                                                                          |
| P | Q0I5E9 | CC | Part of the ABC transporter complex MetNIQ involved in methionine import                                                                                                                                   |
| P | Q0I5E9 | DE | Methionine import ATP-binding protein MetN;                                                                                                                                                                |
| P | Q0I5E9 | DR | D-methionine transmembrane transporter activity                                                                                                                                                            |
| P | Q0IAC3 | CC | Part of the ABC transporter complex PstSACB involved in phosphate import                                                                                                                                   |
| P | Q0IAC3 | DE | ABC phosphate transporter;                                                                                                                                                                                 |
| P | Q0IAC3 | DE | Phosphate import ATP-binding protein PstB;                                                                                                                                                                 |
| P | Q0IAC3 | DE | Phosphate-transporting ATPase;                                                                                                                                                                             |
| P | Q0IAC3 | DR | inorganic phosphate transmembrane transporter activity                                                                                                                                                     |
| P | Q0IAC3 | DR | phosphate transmembrane-transporting ATPase activity                                                                                                                                                       |
| P | Q0ILJ3 | CC | Responsible for the transport of sucrose into the cell, with the concomitant uptake of protons (symport system)                                                                                            |
| P | Q0ILJ3 | DE | Sucrose permease 2;                                                                                                                                                                                        |
| P | Q0ILJ3 | DE | Sucrose transport protein SUT2;                                                                                                                                                                            |
| P | Q0ILJ3 | DE | Sucrose transporter 2;                                                                                                                                                                                     |
| P | Q0ILJ3 | DE | Sucrose-proton symporter 2;                                                                                                                                                                                |
| P | Q0ILJ3 | DR | sucrose transmembrane transporter activity                                                                                                                                                                 |
| P | Q0IWF3 | CC | Aquaporins facilitate the transport of water and small neutral solutes across cell membranes (By similarity).                                                                                              |
| P | Q0IZQ3 | DE | Phosphate transporter 4;5;                                                                                                                                                                                 |
| P | Q0JBZ6 | CC | magnesium transporter that may mediate the influx of magnesium (By similarity)                                                                                                                             |
| P | Q0JBZ6 | DE | Magnesium transporter MRS2-C;                                                                                                                                                                              |
| P | Q0JKV1 | CC | Highly selective inward-rectifying potassium channel that mediates potassium uptake by plant roots                                                                                                         |
| P | Q0JKV1 | CC | May be a major salt-sensitive potassium channel in roots.                                                                                                                                                  |
| P | Q0JKV1 | DE | Potassium channel AKT1;                                                                                                                                                                                    |
| P | Q0JKV1 | DR | voltage-gated potassium channel activity                                                                                                                                                                   |
| P | Q0JPT5 | CC | Aquaporins facilitate the transport of water and small neutral solutes across cell membranes (By similarity).                                                                                              |
| P | Q0K998 | DR | glycerol-3-phosphate-transporting ATPase activity                                                                                                                                                          |
| P | Q0KBR7 | CC | Transport of potassium into the cell (By similarity).                                                                                                                                                      |
| P | Q0KBR7 | DE | Probable potassium transport system protein kup 1;                                                                                                                                                         |
| P | Q0KBR7 | DR | potassium ion transmembrane transporter activity                                                                                                                                                           |
| P | Q0KDG3 | CC | Part of the ABC transporter complex MetNIQ involved in methionine import                                                                                                                                   |
| P | Q0KDG3 | DE | Methionine import ATP-binding protein MetN;                                                                                                                                                                |
| P | Q0KEX1 | DR | sodium:dicarboxylate symporter activity                                                                                                                                                                    |
| P | Q0P7X3 | CC | Na <sup>+</sup> /H <sup>+</sup> antiporter that excludes sodium in exchange for external protons (By similarity)                                                                                           |
| P | Q0P7X3 | DE | Na <sup>+</sup> /H <sup>+</sup> antiporter nhaA 2;                                                                                                                                                         |
| P | Q0P7X3 | DE | Sodium/proton antiporter nhaA 2;                                                                                                                                                                           |
| P | Q0P7X4 | CC | Na <sup>+</sup> /H <sup>+</sup> antiporter that excludes sodium in exchange for external protons (By similarity)                                                                                           |
| P | Q0P7X4 | DE | Na <sup>+</sup> /H <sup>+</sup> antiporter nhaA 1;                                                                                                                                                         |
| P | Q0P7X4 | DE | Sodium/proton antiporter nhaA 1;                                                                                                                                                                           |
| P | Q0RAT5 | CC | Part of the ABC transporter complex F0L4B0C0 involved in                                                                                                                                                   |
| P | Q0RAT5 | CC | Part of the ABC transporter complex F0L4B0C0 involved in                                                                                                                                                   |
| P | Q0RAT5 | DE | Spermidine/putrescine import                                                                                                                                                                               |
| P | Q0RAT5 | DE | Spermidine/putrescine import ATP-binding protein PotA;                                                                                                                                                     |
| P | Q0RAT5 | DE | Spermidine/putrescine import ATP-binding protein PotA;                                                                                                                                                     |
| P | Q0RF16 | CC | One of the components of the high-affinity ATP-driven potassium transport (or KDP) system, which catalyzes the hydrolysis of ATP coupled with the exchange of hydrogen and potassium ions (By similarity). |
| P | Q0RF16 | DE | Potassium-binding and translocating subunit A;                                                                                                                                                             |
| P | Q0RF16 | DE | Potassium-translocating ATPase A chain;                                                                                                                                                                    |
| P | Q0RF16 | DE | Potassium-transporting ATPase A chain;                                                                                                                                                                     |
| P | Q0RF16 | DR | potassium-transporting ATPase activity                                                                                                                                                                     |

|   |        |    |                                                                                                                                                                                         |
|---|--------|----|-----------------------------------------------------------------------------------------------------------------------------------------------------------------------------------------|
| P | Q0RG46 | CC | Na <sup>+</sup> /H <sup>+</sup> antiporter that extrudes sodium in exchange for external protons (By similarity)                                                                        |
| P | Q0RG46 | DE | Na <sup>+</sup> /H <sup>+</sup> antiporter nhaA 3;                                                                                                                                      |
| P | Q0RG46 | DE | Sodium/proton antiporter nhaA 3;                                                                                                                                                        |
| P | Q0RHS2 | CC | Na <sup>+</sup> /H <sup>+</sup> antiporter that extrudes sodium in exchange for external protons (By similarity)                                                                        |
| P | Q0RHS2 | DE | Na <sup>+</sup> /H <sup>+</sup> antiporter nhaA 2;                                                                                                                                      |
| P | Q0RHS2 | DE | Sodium/proton antiporter nhaA 2;                                                                                                                                                        |
| P | Q0RPD5 | CC | Na <sup>+</sup> /H <sup>+</sup> antiporter that extrudes sodium in exchange for external protons (By similarity)                                                                        |
| P | Q0RPD5 | DE | Na <sup>+</sup> /H <sup>+</sup> antiporter nhaA 1;                                                                                                                                      |
| P | Q0RPD5 | DE | Sodium/proton antiporter nhaA 1;                                                                                                                                                        |
| P | Q0SML1 | CC | Part of the ABC transporter complex PotABCD involved in spermidine/putrescine import                                                                                                    |
| P | Q0SML1 | CC | Part of the ABC transporter complex PotABCD involved in spermidine/putrescine import                                                                                                    |
| P | Q0SML1 | DE | Spermidine/putrescine import ATP-binding protein PotA;                                                                                                                                  |
| P | Q0SML1 | DE | Spermidine/putrescine import ATP-binding protein PotA;                                                                                                                                  |
| P | Q0SNU4 | CC | Part of the ABC transporter complex PstSACB involved in phosphate import                                                                                                                |
| P | Q0SNU4 | DE | ABC phosphate transporter;                                                                                                                                                              |
| P | Q0SNU4 | DE | Phosphate import ATP-binding protein PstB;                                                                                                                                              |
| P | Q0SNU4 | DE | Phosphate-transporting ATPase;                                                                                                                                                          |
| P | Q0SNU4 | DR | inorganic phosphate transmembrane transporter activity                                                                                                                                  |
| P | Q0SNU4 | DR | phosphate transmembrane-transporting ATPase activity                                                                                                                                    |
| P | Q0VL18 | CC | Part of the ABC transporter complex PstSACB involved in phosphate import                                                                                                                |
| P | Q0VL18 | DE | ABC phosphate transporter;                                                                                                                                                              |
| P | Q0VL18 | DE | Phosphate import ATP-binding protein PstB;                                                                                                                                              |
| P | Q0VL18 | DE | Phosphate-transporting ATPase;                                                                                                                                                          |
| P | Q0VL18 | DR | inorganic phosphate transmembrane transporter activity                                                                                                                                  |
| P | Q0VL18 | DR | phosphate transmembrane-transporting ATPase activity                                                                                                                                    |
| P | Q0VQ44 | DR | molybdate transmembrane-transporting ATPase activity                                                                                                                                    |
| P | Q0VQ74 | CC | Na <sup>+</sup> /H <sup>+</sup> antiporter that extrudes sodium in exchange for external protons (By similarity)                                                                        |
| P | Q0VQ74 | DE | Na <sup>+</sup> /H <sup>+</sup> antiporter nhaB;                                                                                                                                        |
| P | Q0VQ74 | DE | Sodium/proton antiporter nhaB;                                                                                                                                                          |
| P | Q0VQ74 | DR | sodium:hydrogen antiporter activity                                                                                                                                                     |
| P | Q0VQQ0 | DE | Lipoprotein-releasing system ATP-binding protein LolD;                                                                                                                                  |
| P | Q0VQQ0 | DR | lipoprotein transporter activity                                                                                                                                                        |
| P | Q0VR80 | CC | Part of the ABC transporter complex CcmAB involved in the biogenesis of c-type cytochromes; once thought to export heme, this seems not to be the case, but its exact role is uncertain |
| P | Q0VR80 | DE | Heme exporter protein A;                                                                                                                                                                |
| P | Q0VR80 | DR | heme-transporting ATPase activity                                                                                                                                                       |
| P | Q0VTB6 | CC | Part of the ABC transporter complex ZnuABC involved in zinc import                                                                                                                      |
| P | Q0VTB6 | DE | Zinc import ATP-binding protein ZnuC;                                                                                                                                                   |
| P | Q0VTB6 | DR | zinc transporting ATPase activity                                                                                                                                                       |
| P | Q0WJ82 | CC | Involved in the import of serine and threonine into the cell, with the concomitant import of sodium (symport system) (By similarity).                                                   |
| P | Q0WJ82 | CC | Involved in the import of serine and threonine into the cell, with the concomitant import of sodium (symport system) (By similarity).                                                   |
| P | Q0WJ82 | DE | Na <sup>+</sup> /serine-threonine symporter;                                                                                                                                            |
| P | Q0WJ82 | DE | Na <sup>+</sup> /serine-threonine symporter;                                                                                                                                            |
| P | Q0WJ82 | DE | Serine/threonine transporter sstT;                                                                                                                                                      |
| P | Q0WJ82 | DR | sodium:dicarboxylate symporter activity                                                                                                                                                 |
| P | Q0WJ82 | DR | sodium:dicarboxylate symporter activity                                                                                                                                                 |
| P | Q0WJE4 | CC | Part of the ABC transporter complex ThiBPQ involved in thiamine import                                                                                                                  |
| P | Q0WJE4 | DE | Thiamine import ATP-binding protein ThiQ;                                                                                                                                               |
| P | Q0WML0 | DE | Antigen peptide transporter-like 2;                                                                                                                                                     |
| P | Q10065 | DE | Potassium transport protein 2;                                                                                                                                                          |
| P | Q10065 | DR | potassium ion transmembrane transporter activity                                                                                                                                        |
| P | Q10177 | CC | Regulates cell morphogenesis through control of manganese homeostasis.                                                                                                                  |
| P | Q10177 | CC | Transports manganese ions into the cell                                                                                                                                                 |
| P | Q10177 | DE | Manganese transporter pdt1;                                                                                                                                                             |
| P | Q10177 | DR | manganese ion transmembrane transporter activity                                                                                                                                        |
| P | Q10185 | CC | Involved in vacuolar sequestration of glutathione S- conjugates                                                                                                                         |
| P | Q10185 | DE | ATP-energized glutathione S-conjugate pump abc2;                                                                                                                                        |
| P | Q10185 | DE | Glutathione S-conjugate-transporting ATPase abc2;                                                                                                                                       |
| P | Q10185 | DR | glutathione S-conjugate-exporting ATPase activity                                                                                                                                       |
| P | Q10279 | CC | Transport of uracil.                                                                                                                                                                    |
| P | Q10279 | DE | Uracil permease;                                                                                                                                                                        |

|   |        |    |                                                                                                                                                              |
|---|--------|----|--------------------------------------------------------------------------------------------------------------------------------------------------------------|
| P | Q10901 | CC | Essential for terminating the postsynaptic action of glutamate by rapidly removing released glutamate from the synaptic cleft                                |
| P | Q10901 | CC | Transports L-glutamate and also L- and D-aspartate                                                                                                           |
| P | Q10901 | DE | Sodium-dependent glutamate/ aspartate transporter;                                                                                                           |
| P | Q10901 | DR | L-glutamate transmembrane transporter activity                                                                                                               |
| P | Q10D38 | CC | magnesium transporter that may mediate the influx of magnesium (By similarity)                                                                               |
| P | Q10D38 | DE | Magnesium transporter MRS2-I;                                                                                                                                |
| P | Q10M80 | CC | Aquaporins facilitate the transport of water and small neutral solutes across cell membranes (By similarity).                                                |
| P | Q10S25 | CC | Putative magnesium transporter (By similarity).                                                                                                              |
| P | Q10S25 | DE | Putative magnesium transporter MRS2-H;                                                                                                                       |
| P | Q11NG0 | CC | Part of the ABC transporter complex PstSACB involved in phosphate import                                                                                     |
| P | Q11NG0 | DE | ABC phosphate transporter;                                                                                                                                   |
| P | Q11NG0 | DE | Phosphate import ATP-binding protein PstB;                                                                                                                   |
| P | Q11NG0 | DE | Phosphate-transporting ATPase;                                                                                                                               |
| P | Q11NG0 | DR | inorganic phosphate transmembrane transporter activity                                                                                                       |
| P | Q11NG0 | DR | phosphate transmembrane-transporting ATPase activity                                                                                                         |
| P | Q11PK1 | CC | Transport of potassium into the cell (By similarity).                                                                                                        |
| P | Q11PK1 | DE | Probable potassium transport system protein kup;                                                                                                             |
| P | Q11PK1 | DR | potassium ion transmembrane transporter activity                                                                                                             |
| P | Q11TX2 | CC | Na <sup>+</sup> /H <sup>+</sup> antiporter that extrudes sodium in exchange for external protons (By similarity)                                             |
| P | Q11TX2 | DE | Na <sup>+</sup> /H <sup>+</sup> antiporter nhaA;                                                                                                             |
| P | Q11TX2 | DE | Sodium/proton antiporter nhaA;                                                                                                                               |
| P | Q12067 | CC | Functions in the homeostasis of manganese ions.                                                                                                              |
| P | Q12067 | DR | manganese ion transmembrane transporter activity                                                                                                             |
| P | Q12119 | CC | Probable purine-cytosine permease (By similarity).                                                                                                           |
| P | Q12119 | DE | Cytosine/purine transport protein FCY22;                                                                                                                     |
| P | Q12119 | DE | Cytosine/purine transport protein FCY22;                                                                                                                     |
| P | Q12119 | DE | Purine-cytosine permease FCY22;                                                                                                                              |
| P | Q12289 | CC | Transports carnitine, acetylcarnitine, propionylcarnitine and to a much lower extent medium- and long- chain acylcarnitines.                                 |
| P | Q12289 | DE | Mitochondrial carnitine carrier;                                                                                                                             |
| P | Q12289 | DR | carnitine:acyl carnitine antiporter activity                                                                                                                 |
| P | Q12300 | CC | Can function as a sensor that generates an intracellular signal in the presence of high level of glucose                                                     |
| P | Q12300 | CC | Low-affinity glucose transporter                                                                                                                             |
| P | Q12300 | CC | Required for maximal expression of the high glucose-induced HXT1 protein.                                                                                    |
| P | Q12300 | DE | High-affinity glucose transporter RGT2;                                                                                                                      |
| P | Q12325 | CC | High affinity uptake of sulfate into the cell.                                                                                                               |
| P | Q12325 | DE | High-affinity sulfate transporter 2;                                                                                                                         |
| P | Q12325 | DE | Sulfate permease 2;                                                                                                                                          |
| P | Q12325 | DR | secondary active sulfate transmembrane transporter activity                                                                                                  |
| P | Q12436 | CC | Active in zinc- replete cells and is time-, temperature- and concentration-dependent and prefers zinc over other metals as its substrate.                    |
| P | Q12436 | CC | Low-affinity zinc transport protein                                                                                                                          |
| P | Q12436 | DE | Low-affinity zinc transport protein ZRT2;                                                                                                                    |
| P | Q12436 | DE | Zinc-regulated transporter 2;                                                                                                                                |
| P | Q12436 | DR | low-affinity zinc ion transmembrane transporter activity                                                                                                     |
| P | Q12675 | DE | Probable phospholipid-transporting ATPase DNF2;                                                                                                              |
| P | Q12675 | DR | phospholipid-translocating ATPase activity                                                                                                                   |
| P | Q12691 | CC | This magnesium-dependent enzyme catalyzes the hydrolysis of ATP coupled with the transport of sodium or lithium ions to allow salt tolerance (By similarity) |
| P | Q12691 | DE | Sodium transport ATPase 5;                                                                                                                                   |
| P | Q12691 | DR | sodium-exporting ATPase activity, phosphorylative mechanism                                                                                                  |
| P | Q12809 | CC | Mediates the rapidly activating component of the delayed rectifying potassium current in heart (IKr)                                                         |
| P | Q12809 | CC | slow-activating (alpha) subunit of voltage-gated inwardly rectifying potassium channel                                                                       |
| P | Q12809 | DE | Ether-a-go-go-related gene potassium channel 1;                                                                                                              |
| P | Q12809 | DE | Potassium voltage-gated channel subfamily H member 2;                                                                                                        |
| P | Q12809 | DE | Voltage-gated potassium channel subunit Kv11.1;                                                                                                              |
| P | Q12809 | DR | delayed rectifier potassium channel activity                                                                                                                 |
| P | Q12908 | CC | Plays a critical role in the sodium-dependent reabsorption of bile acids from the lumen of the small intestine                                               |
| P | Q12908 | DE | Apical sodium-dependent bile acid transporter;                                                                                                               |
| P | Q12908 | DE | Apical sodium-dependent bile acid transporter;                                                                                                               |

|   |        |    |                                                                                                                                                                                                                                                                                                     |
|---|--------|----|-----------------------------------------------------------------------------------------------------------------------------------------------------------------------------------------------------------------------------------------------------------------------------------------------------|
| P | Q12908 | DE | Ileal Na <sup>+</sup> /bile acid cotransporter;                                                                                                                                                                                                                                                     |
| P | Q12908 | DE | Ileal Na <sup>+</sup> /bile acid cotransporter;                                                                                                                                                                                                                                                     |
| P | Q12908 | DE | Ileal sodium-dependent bile acid transporter;                                                                                                                                                                                                                                                       |
| P | Q12908 | DE | Ileal sodium-dependent bile acid transporter;                                                                                                                                                                                                                                                       |
| P | Q12908 | DE | Ileal sodium/bile acid cotransporter;                                                                                                                                                                                                                                                               |
| P | Q12908 | DE | Ileal sodium/bile acid cotransporter;                                                                                                                                                                                                                                                               |
| P | Q12908 | DE | Na <sup>+</sup> -dependent ileal bile acid transporter;                                                                                                                                                                                                                                             |
| P | Q12908 | DE | Na <sup>+</sup> -dependent ileal bile acid transporter;                                                                                                                                                                                                                                             |
| P | Q12908 | DE | Sodium/taurocholate cotransporting polypeptide, ileal;                                                                                                                                                                                                                                              |
| P | Q12908 | DR | bile acid:sodium symporter activity                                                                                                                                                                                                                                                                 |
| P | Q12908 | DR | bile acid:sodium symporter activity                                                                                                                                                                                                                                                                 |
| P | Q13183 | CC | Cotransport of sodium ions and dicarboxylates such as succinate and citrate.                                                                                                                                                                                                                        |
| P | Q13183 | CC | Cotransport of sodium ions and dicarboxylates such as succinate and citrate.                                                                                                                                                                                                                        |
| P | Q13183 | DE | Na <sup>+</sup> /dicarboxylate cotransporter 1;                                                                                                                                                                                                                                                     |
| P | Q13183 | DE | Na <sup>+</sup> /dicarboxylate cotransporter 1;                                                                                                                                                                                                                                                     |
| P | Q13183 | DE | Renal sodium/dicarboxylate cotransporter;                                                                                                                                                                                                                                                           |
| P | Q13183 | DE | Renal sodium/dicarboxylate cotransporter;                                                                                                                                                                                                                                                           |
| P | Q13183 | DR | low affinity sodium:dicarboxylate symporter activity                                                                                                                                                                                                                                                |
| P | Q13183 | DR | low affinity sodium:dicarboxylate symporter activity                                                                                                                                                                                                                                                |
| P | Q13336 | CC | Mediates urea transport in erythrocytes.                                                                                                                                                                                                                                                            |
| P | Q13336 | CC | Specialized low-affinity urea transporter                                                                                                                                                                                                                                                           |
| P | Q13336 | DE | Urea transporter 1;                                                                                                                                                                                                                                                                                 |
| P | Q13336 | DE | Urea transporter, erythrocyte;                                                                                                                                                                                                                                                                      |
| P | Q13336 | DR | urea transmembrane transporter activity                                                                                                                                                                                                                                                             |
| P | Q13433 | DE | Zinc transporter ZIP6;                                                                                                                                                                                                                                                                              |
| P | Q13433 | DR | zinc ion transmembrane transporter activity<br>forms a water-specific channel that participates in distinct physiological functions such as glomerular filtration, tubular endocytosis and acid-base metabolism (By similarity)                                                                     |
| P | Q13520 | CC | water channel activity                                                                                                                                                                                                                                                                              |
| P | Q13520 | DR | water channel activity                                                                                                                                                                                                                                                                              |
| P | Q13621 | CC | Mediates sodium and chloride reabsorption                                                                                                                                                                                                                                                           |
| P | Q13621 | CC | Mediates sodium and chloride reabsorption                                                                                                                                                                                                                                                           |
| P | Q13621 | DE | Bumetanide-sensitive sodium-(potassium)-chloride cotransporter 2;                                                                                                                                                                                                                                   |
| P | Q13621 | DR | sodium:potassium:chloride symporter activity                                                                                                                                                                                                                                                        |
| P | Q13621 | DR | sodium:potassium:chloride symporter activity                                                                                                                                                                                                                                                        |
| P | Q13621 | DR | sodium:potassium:chloride symporter activity                                                                                                                                                                                                                                                        |
| P | Q13698 | CC | Calcium channels containing the alpha-1S subunit play an important role in excitation-contraction coupling in skeletal muscle.                                                                                                                                                                      |
| P | Q13698 | CC | Long-lasting (L-type) calcium channels belong to the 'high-voltage activated' (HVA) group                                                                                                                                                                                                           |
| P | Q13698 | CC | The isoform alpha-1S gives rise to L-type calcium currents                                                                                                                                                                                                                                          |
| P | Q13698 | CC | Voltage-sensitive calcium channels (VSCC) mediate the entry of calcium ions into excitable cells and are also involved in a variety of calcium-dependent processes, including muscle contraction, hormone or neurotransmitter release, gene expression, cell motility, cell division and cell death |
| P | Q13698 | DE | Calcium channel, L type, alpha-1 polypeptide, isoform 3, skeletal muscle;                                                                                                                                                                                                                           |
| P | Q13698 | DE | Voltage-dependent L-type calcium channel subunit alpha-1S;                                                                                                                                                                                                                                          |
| P | Q13698 | DE | Voltage-gated calcium channel subunit alpha Cav1.1;                                                                                                                                                                                                                                                 |
| P | Q13698 | DR | high voltage-gated calcium channel activity                                                                                                                                                                                                                                                         |
| P | Q13733 | CC | This action creates the electrochemical gradient of sodium and potassium ions, providing the energy for active transport of various nutrients                                                                                                                                                       |
| P | Q13733 | CC | This action creates the electrochemical gradient of sodium and potassium ions, providing the energy for active transport of various nutrients                                                                                                                                                       |
| P | Q13733 | CC | This is the catalytic component of the active enzyme, which catalyzes the hydrolysis of ATP coupled with the exchange of sodium and potassium ions across the plasma membrane                                                                                                                       |
| P | Q13733 | CC | This is the catalytic component of the active enzyme, which catalyzes the hydrolysis of ATP coupled with the exchange of sodium and potassium ions across the plasma membrane                                                                                                                       |
| P | Q13733 | DE | Na <sup>+</sup> /K <sup>+</sup> ATPase alpha-4 subunit;                                                                                                                                                                                                                                             |
| P | Q13733 | DE | Na <sup>+</sup> /K <sup>+</sup> ATPase alpha-4 subunit;                                                                                                                                                                                                                                             |
| P | Q13733 | DE | Sodium pump subunit alpha-4;                                                                                                                                                                                                                                                                        |
| P | Q13733 | DE | Sodium/potassium-transporting ATPase subunit alpha-4;                                                                                                                                                                                                                                               |
| P | Q13733 | DE | Sodium/potassium-transporting ATPase subunit alpha-4;                                                                                                                                                                                                                                               |
| P | Q13733 | DR | sodium:potassium-exchanging ATPase activity                                                                                                                                                                                                                                                         |
| P | Q13733 | DR | sodium:potassium-exchanging ATPase activity                                                                                                                                                                                                                                                         |



|   |        |    |                                                                                                                                                                                                                                            |
|---|--------|----|--------------------------------------------------------------------------------------------------------------------------------------------------------------------------------------------------------------------------------------------|
| P | Q14003 | CC | Assuming opened or closed conformations in response to the voltage difference across the membrane, the protein forms a potassium-selective channel through which potassium ions may pass in accordance with their electrochemical gradient |
| P | Q14003 | CC | This protein mediates the voltage-dependent potassium ion permeability of excitable membranes                                                                                                                                              |
| P | Q14003 | DE | Potassium voltage-gated channel subfamily C member 3;                                                                                                                                                                                      |
| P | Q14003 | DE | Voltage-gated potassium channel subunit Kv3.3;                                                                                                                                                                                             |
| P | Q14003 | DR | voltage-gated potassium channel activity                                                                                                                                                                                                   |
| P | Q14500 | CC | Inward rectifier potassium channels are characterized by a greater tendency to allow potassium to flow into the cell rather than out of it                                                                                                 |
| P | Q14500 | CC | Their voltage dependence is regulated by the concentration of extracellular potassium; as external potassium is raised, the voltage range of the channel opening shifts to more positive voltages                                          |
| P | Q14500 | DE | ATP-sensitive inward rectifier potassium channel 12;                                                                                                                                                                                       |
| P | Q14500 | DE | Inward rectifier K+ channel Kir2.2;                                                                                                                                                                                                        |
| P | Q14500 | DE | Inward rectifier K+ channel Kir2.2v;                                                                                                                                                                                                       |
| P | Q14500 | DE | Potassium channel, inwardly rectifying subfamily J member 12;                                                                                                                                                                              |
| P | Q14500 | DR | inward rectifier potassium channel activity                                                                                                                                                                                                |
| P | Q14500 | DR | potassium channel regulator activity                                                                                                                                                                                                       |
| P | Q14542 | DE | Equilibrative NBMPR-insensitive nucleoside transporter;                                                                                                                                                                                    |
| P | Q14542 | DE | Equilibrative NBMPR-insensitive nucleoside transporter                                                                                                                                                                                     |
| P | Q14542 | DE | Equilibrative nucleoside transporter 2;                                                                                                                                                                                                    |
| P | Q14542 | DE | Nucleoside transporter, ei-type;                                                                                                                                                                                                           |
| P | Q14542 | DR | nucleoside transmembrane transporter activity                                                                                                                                                                                              |
| P | Q14571 | CC | Receptor for inositol 1,4,5-trisphosphate, a second messenger that mediates the release of intracellular calcium.                                                                                                                          |
| P | Q14571 | DR | calcium ion transmembrane transporter activity                                                                                                                                                                                             |
| P | Q14571 | DR | inositol 1,4,5-trisphosphate-sensitive calcium-release channel activity                                                                                                                                                                    |
| P | Q14573 | CC | Receptor for inositol 1,4,5-trisphosphate, a second messenger that mediates the release of intracellular calcium.                                                                                                                          |
| P | Q14573 | DR | inositol 1,4,5-trisphosphate-sensitive calcium-release channel activity                                                                                                                                                                    |
| P | Q14643 | CC | Intracellular channel that mediates calcium release from the endoplasmic reticulum following stimulation by inositol 1,4,5- trisphosphate.                                                                                                 |
| P | Q14643 | DR | calcium ion transmembrane transporter activity                                                                                                                                                                                             |
| P | Q14643 | DR | inositol 1,4,5-trisphosphate-sensitive calcium-release channel activity                                                                                                                                                                    |
| P | Q14721 | CC | Channels open or close in response to the voltage difference across the membrane, letting potassium ions pass in accordance with their electrochemical gradient                                                                            |
| P | Q14721 | CC | mediates the voltage-dependent potassium ion permeability of excitable membranes                                                                                                                                                           |
| P | Q14721 | DE | Delayed rectifier potassium channel 1;                                                                                                                                                                                                     |
| P | Q14721 | DE | Potassium voltage-gated channel subfamily B member 1;                                                                                                                                                                                      |
| P | Q14721 | DE | Voltage-gated potassium channel subunit Kv2.1;                                                                                                                                                                                             |
| P | Q14721 | DR | voltage-gated potassium channel activity                                                                                                                                                                                                   |
| P | Q14728 | DE | Tetracycline transporter-like protein;                                                                                                                                                                                                     |
| P | Q14728 | DR | tetracycline transporter activity                                                                                                                                                                                                          |
| P | Q14802 | CC | Induces a hyperpolarization-activated chloride current when expressed in Xenopus oocytes                                                                                                                                                   |
| P | Q14802 | DE | Chloride conductance inducer protein Mat-8;                                                                                                                                                                                                |
| P | Q14802 | DR | chloride channel activity                                                                                                                                                                                                                  |
| P | Q14916 | CC | Important for the resorption of phosphate by the kidney                                                                                                                                                                                    |
| P | Q14916 | CC | May be involved in actively transporting phosphate into cells via Na+ cotransport in the renal brush border membrane.                                                                                                                      |
| P | Q14916 | CC | May be involved in actively transporting phosphate into cells via Na+ cotransport in the renal brush border membrane.                                                                                                                      |
| P | Q14916 | DE | Na+/PI cotransporter 1;                                                                                                                                                                                                                    |
| P | Q14916 | DE | Renal Na+-dependent phosphate cotransporter 1;                                                                                                                                                                                             |
| P | Q14916 | DE | Renal Na+-dependent phosphate cotransporter 1;                                                                                                                                                                                             |
| P | Q14916 | DE | Renal sodium-dependent phosphate transport protein 1;                                                                                                                                                                                      |
| P | Q14916 | DE | Renal sodium-dependent phosphate transport protein 1;                                                                                                                                                                                      |
| P | Q14916 | DE | Renal sodium-phosphate transport protein 1;                                                                                                                                                                                                |
| P | Q14916 | DE | Sodium-dependent phosphate transport protein 1;                                                                                                                                                                                            |
| P | Q14916 | DE | Sodium-dependent phosphate transport protein 1;                                                                                                                                                                                            |
| P | Q14916 | DE | Sodium/phosphate cotransporter 1;                                                                                                                                                                                                          |
| P | Q14916 | DE | Sodium/phosphate cotransporter 1;                                                                                                                                                                                                          |
| P | Q14916 | DR | sodium-dependent phosphate transmembrane transporter activity                                                                                                                                                                              |
| P | Q14916 | DR | sodium-dependent phosphate transmembrane transporter activity                                                                                                                                                                              |

|   |        |    |                                                                                                                                                                                                                                                                                                     |
|---|--------|----|-----------------------------------------------------------------------------------------------------------------------------------------------------------------------------------------------------------------------------------------------------------------------------------------------------|
| P | Q14940 | CC | major proton extruding system driven by the inward sodium ion chemical gradient                                                                                                                                                                                                                     |
| P | Q14940 | DE | Na <sup>+</sup> /H <sup>+</sup> exchanger 5;                                                                                                                                                                                                                                                        |
| P | Q14940 | DE | Sodium/hydrogen exchanger 5;                                                                                                                                                                                                                                                                        |
| P | Q14940 | DR | sodium:hydrogen antiporter activity                                                                                                                                                                                                                                                                 |
| P | Q14973 | CC | It is strictly dependent on the extracellular presence of sodium.                                                                                                                                                                                                                                   |
| P | Q14973 | CC | The hepatic sodium/bile acid uptake system exhibits broad substrate specificity and transports various non-bile acid organic compounds as well                                                                                                                                                      |
| P | Q14973 | CC | The hepatic sodium/bile acid uptake system exhibits broad substrate specificity and transports various non-bile acid organic compounds as well                                                                                                                                                      |
| P | Q14973 | DE | Na <sup>+</sup> /bile acid cotransporter;                                                                                                                                                                                                                                                           |
| P | Q14973 | DE | Na <sup>+</sup> /bile acid cotransporter;                                                                                                                                                                                                                                                           |
| P | Q14973 | DE | Na <sup>+</sup> /taurocholate transport protein;                                                                                                                                                                                                                                                    |
| P | Q14973 | DE | Sodium/bile acid cotransporter;                                                                                                                                                                                                                                                                     |
| P | Q14973 | DE | Sodium/bile acid cotransporter;                                                                                                                                                                                                                                                                     |
| P | Q14973 | DE | Sodium/taurocholate cotransporting polypeptide;                                                                                                                                                                                                                                                     |
| P | Q14973 | DR | bile acid:sodium symporter activity                                                                                                                                                                                                                                                                 |
| P | Q14973 | DR | bile acid:sodium symporter activity                                                                                                                                                                                                                                                                 |
| P | Q14CL3 | DE | potassium voltage-gated channel, subfamily H (Eag-related), member 1, isoform CD A 1.1.                                                                                                                                                                                                             |
| P | Q14CL3 | DE | Potassium voltage-gated channel, subfamily H (Eag-related), member 1;                                                                                                                                                                                                                               |
| P | Q14CL3 | DR | voltage-gated potassium channel activity                                                                                                                                                                                                                                                            |
| P | Q14CN2 | DR | chloride channel activity                                                                                                                                                                                                                                                                           |
| P | Q14D71 | DE | potassium voltage-gated channel, Shal-related subfamily, member 3, isoform CD A 1.1.                                                                                                                                                                                                                |
| P | Q14D71 | DE | Potassium voltage-gated channel, Shal-related subfamily, member 3;                                                                                                                                                                                                                                  |
| P | Q15043 | DE | LIV-1 subfamily of ZIP zinc transporter 4;                                                                                                                                                                                                                                                          |
| P | Q15043 | DE | Zinc transporter ZIP14;                                                                                                                                                                                                                                                                             |
| P | Q15043 | DR | zinc ion transmembrane transporter activity                                                                                                                                                                                                                                                         |
| P | Q15413 | CC | Contraction of skeletal muscle is triggered by release of calcium ions from SR following depolarization of T-tubules (By similarity).                                                                                                                                                               |
| P | Q15413 | DR | ryanodine-sensitive calcium-release channel activity                                                                                                                                                                                                                                                |
| P | Q15758 | CC | Has a broad substrate specificity, a preference for zwitterionic amino acids, and a sodium-dependence                                                                                                                                                                                               |
| P | Q15758 | DE | Sodium-dependent neutral amino acid transporter type 2;                                                                                                                                                                                                                                             |
| P | Q15758 | DR | sodium:dicarboxylate symporter activity                                                                                                                                                                                                                                                             |
| P | Q15842 | CC | Inward rectifier potassium channels are characterized by a greater tendency to allow potassium to flow into the cell rather than out of it                                                                                                                                                          |
| P | Q15842 | CC | Their voltage dependence is regulated by the concentration of extracellular potassium; as external potassium is raised, the voltage range of the channel opening shifts to more positive voltages                                                                                                   |
| P | Q15842 | CC | This potassium channel is controlled by G proteins                                                                                                                                                                                                                                                  |
| P | Q15842 | DE | ATP-sensitive inward rectifier potassium channel 8;                                                                                                                                                                                                                                                 |
| P | Q15842 | DE | Inward rectifier K <sup>+</sup> channel Kir6.1;                                                                                                                                                                                                                                                     |
| P | Q15842 | DE | Potassium channel, inwardly rectifying subfamily J member 8;                                                                                                                                                                                                                                        |
| P | Q15849 | CC | Mediates rapid transepithelial urea transport across the inner medullary collecting duct and plays a major role in the urinary concentrating mechanism.                                                                                                                                             |
| P | Q15849 | CC | Specialized low-affinity vasopressin-regulated urea transporter                                                                                                                                                                                                                                     |
| P | Q15849 | DE | Urea transporter 2;                                                                                                                                                                                                                                                                                 |
| P | Q15849 | DE | Urea transporter, kidney;                                                                                                                                                                                                                                                                           |
| P | Q15849 | DR | urea transmembrane transporter activity                                                                                                                                                                                                                                                             |
| P | Q15878 | CC | Calcium channels containing alpha-1E subunit could be involved in the modulation of firing patterns of neurons which is important for information processing                                                                                                                                        |
| P | Q15878 | CC | R-type calcium channels belong to the 'high-voltage activated' (HVA) group and are blocked by nickel, and partially by omega-agatoxin-IIIa (omega-Aga-IIIa)                                                                                                                                         |
| P | Q15878 | CC | The isoform alpha-1E gives rise to R-type calcium currents                                                                                                                                                                                                                                          |
| P | Q15878 | CC | Voltage-sensitive calcium channels (VSCC) mediate the entry of calcium ions into excitable cells and are also involved in a variety of calcium-dependent processes, including muscle contraction, hormone or neurotransmitter release, gene expression, cell motility, cell division and cell death |
| P | Q15878 | DE | Brain calcium channel II;                                                                                                                                                                                                                                                                           |
| P | Q15878 | DE | Calcium channel, L type, alpha-1 polypeptide, isoform 6;                                                                                                                                                                                                                                            |
| P | Q15878 | DE | Voltage-dependent R-type calcium channel subunit alpha-1E;                                                                                                                                                                                                                                          |
| P | Q15878 | DE | Voltage-gated calcium channel subunit alpha Cav2.3;                                                                                                                                                                                                                                                 |
| P | Q15878 | DR | voltage-gated calcium channel activity                                                                                                                                                                                                                                                              |
| P | Q16322 | CC | Assuming opened or closed conformations in response to the voltage difference across the membrane, the protein forms a potassium-selective channel through which potassium ions may pass in accordance with their electrochemical gradient                                                          |

|   |        |    |                                                                                                                                                                                                                                            |
|---|--------|----|--------------------------------------------------------------------------------------------------------------------------------------------------------------------------------------------------------------------------------------------|
| P | Q16322 | CC | Mediates voltage-dependent potassium ion permeability of excitable membranes                                                                                                                                                               |
| P | Q16322 | DE | Potassium voltage-gated channel subfamily A member 10;                                                                                                                                                                                     |
| P | Q16322 | DE | Voltage-gated potassium channel subunit Kv1.8;                                                                                                                                                                                             |
| P | Q16322 | DR | voltage-gated potassium channel activity                                                                                                                                                                                                   |
| P | Q16348 | DE | Oligopeptide transporter, kidney isoform;                                                                                                                                                                                                  |
| P | Q16445 | CC | GABA, the major inhibitory neurotransmitter in the vertebrate brain, mediates neuronal inhibition by binding to the GABA/benzodiazepine receptor and opening an integral chloride channel.                                                 |
| P | Q16445 | DR | chloride channel activity                                                                                                                                                                                                                  |
| P | Q16515 | CC | Cation channel with high affinity for sodium, which is gated by extracellular protons and inhibited by the diuretic amiloride                                                                                                              |
| P | Q16515 | DE | Amiloride-sensitive brain sodium channel;                                                                                                                                                                                                  |
| P | Q16515 | DE | Brain sodium channel 1;                                                                                                                                                                                                                    |
| P | Q16515 | DR | ligand-gated sodium channel activity                                                                                                                                                                                                       |
| P | Q16572 | CC | Involved in acetylcholine transport into synaptic vesicles.                                                                                                                                                                                |
| P | Q16572 | DE | Vesicular acetylcholine transporter;                                                                                                                                                                                                       |
| P | Q16572 | DR | acetylcholine transmembrane transporter activity                                                                                                                                                                                           |
| P | Q166T6 | DE | Nitrite extrusion protein;                                                                                                                                                                                                                 |
| P | Q16720 | CC | This magnesium-dependent enzyme catalyzes the hydrolysis of ATP coupled with the transport of calcium out of the cell.                                                                                                                     |
| P | Q16720 | DE | Plasma membrane calcium ATPase isoform 3;                                                                                                                                                                                                  |
| P | Q16720 | DE | Plasma membrane calcium pump isoform 3;                                                                                                                                                                                                    |
| P | Q16720 | DE | Plasma membrane calcium-transporting ATPase 3;                                                                                                                                                                                             |
| P | Q16720 | DR | calcium-transporting ATPase activity                                                                                                                                                                                                       |
| P | Q17328 | CC | Glutamate gated chloride channel that is dual gated by glutamate and avermectin.                                                                                                                                                           |
| P | Q17328 | DE | Avermectin-sensitive glutamate-gated chloride channel subunit;                                                                                                                                                                             |
| P | Q17328 | DE | Glutamate-gated chloride channel subunit beta;                                                                                                                                                                                             |
| P | Q17328 | DR | chloride channel activity                                                                                                                                                                                                                  |
| P | Q17758 | DE | Oligopeptide transporter 1;                                                                                                                                                                                                                |
| P | Q17758 | DR | oligopeptide transporter activity                                                                                                                                                                                                          |
| P | Q17766 | CC | Folate transporter.                                                                                                                                                                                                                        |
| P | Q17766 | DE | Folate transporter 1;                                                                                                                                                                                                                      |
| P | Q17766 | DR | reduced folate carrier activity                                                                                                                                                                                                            |
| P | Q17ST2 | CC | Assuming opened or closed conformations in response to the voltage difference across the membrane, the protein forms a potassium-selective channel through which potassium ions may pass in accordance with their electrochemical gradient |
| P | Q17ST2 | CC | mediates the voltage-dependent potassium ion permeability of excitable membranes                                                                                                                                                           |
| P | Q17ST2 | DE | Potassium voltage-gated channel subfamily A member 7;                                                                                                                                                                                      |
| P | Q17ST2 | DE | Voltage-gated potassium channel subunit Kv1.7;                                                                                                                                                                                             |
| P | Q17ST2 | DR | voltage-gated potassium channel activity                                                                                                                                                                                                   |
| P | Q180A5 | CC | Part of the ABC transporter complex PstSACB involved in phosphate import                                                                                                                                                                   |
| P | Q180A5 | DE | ABC phosphate transporter;                                                                                                                                                                                                                 |
| P | Q180A5 | DE | Phosphate import ATP-binding protein PstB;                                                                                                                                                                                                 |
| P | Q180A5 | DE | Phosphate-transporting ATPase;                                                                                                                                                                                                             |
| P | Q180A5 | DR | inorganic phosphate transmembrane transporter activity                                                                                                                                                                                     |
| P | Q180A5 | DR | phosphate transmembrane-transporting ATPase activity                                                                                                                                                                                       |
| P | Q18120 | CC | Outwardly rectifying potassium channel protein; activity is sharply augmented by increase in temperature.                                                                                                                                  |
| P | Q18120 | DE | TWIK family of potassium channels protein 18;                                                                                                                                                                                              |
| P | Q18120 | DR | outward rectifier potassium channel activity                                                                                                                                                                                               |
| P | Q186E8 | CC | One of the components of the high-affinity ATP-driven potassium transport (or KDP) system, which catalyzes the hydrolysis of ATP coupled with the exchange of hydrogen and potassium ions                                                  |
| P | Q186E8 | DE | Potassium-binding and translocating subunit C;                                                                                                                                                                                             |
| P | Q186E8 | DE | Potassium-translocating ATPase C chain;                                                                                                                                                                                                    |
| P | Q186E8 | DE | Potassium-transporting ATPase C chain;                                                                                                                                                                                                     |
| P | Q186E8 | DR | potassium-transporting ATPase activity                                                                                                                                                                                                     |
| P | Q18AM3 | CC | Part of the ABC transporter complex PotABCD involved in spermidine/putrescine import                                                                                                                                                       |
| P | Q18AM3 | CC | Part of the ABC transporter complex PotABCD involved in spermidine/putrescine import                                                                                                                                                       |
| P | Q18AM3 | DE | Spermidine/putrescine import ATP-binding protein PotA;                                                                                                                                                                                     |
| P | Q18AM3 | DE | Spermidine/putrescine import ATP-binding protein PotA;                                                                                                                                                                                     |
| P | Q18C09 | CC | Part of the ABC transporter complex MetNIQ involved in methionine import                                                                                                                                                                   |
| P | Q18C09 | DE | Methionine import ATP-binding protein MetN;                                                                                                                                                                                                |
| P | Q19907 | DE | TWIK family of potassium channels protein 12;                                                                                                                                                                                              |
| P | Q19907 | DR | potassium channel activity                                                                                                                                                                                                                 |

|   |        |    |                                                                                                                                                                                         |
|---|--------|----|-----------------------------------------------------------------------------------------------------------------------------------------------------------------------------------------|
| P | Q19QZ8 | DE | T calcium channel alpha 1G subunit variant 221;                                                                                                                                         |
| P | Q19QZ8 | DR | voltage-gated calcium channel activity                                                                                                                                                  |
| P | Q19QZ9 | DE | T calcium channel alpha 1G subunit variant 217;                                                                                                                                         |
| P | Q19QZ9 | DR | voltage-gated calcium channel activity                                                                                                                                                  |
| P | Q19R02 | DE | T calcium channel alpha 1G subunit variant 189;                                                                                                                                         |
| P | Q19R02 | DR | voltage-gated calcium channel activity                                                                                                                                                  |
| P | Q19R03 | DE | T calcium channel alpha 1G subunit variant 185;                                                                                                                                         |
| P | Q19R03 | DR | voltage-gated calcium channel activity                                                                                                                                                  |
| P | Q19R08 | DE | T calcium channel alpha 1G subunit variant 153;                                                                                                                                         |
| P | Q19R08 | DR | voltage-gated calcium channel activity                                                                                                                                                  |
| P | Q19R11 | DE | T calcium channel alpha 1G subunit variant 93;                                                                                                                                          |
| P | Q19R11 | DR | voltage-gated calcium channel activity                                                                                                                                                  |
| P | Q19R12 | DE | T calcium channel alpha 1G subunit variant 89;                                                                                                                                          |
| P | Q19R12 | DR | voltage-gated calcium channel activity                                                                                                                                                  |
| P | Q19R13 | DE | T calcium channel alpha 1G subunit variant 88;                                                                                                                                          |
| P | Q19R13 | DR | voltage-gated calcium channel activity                                                                                                                                                  |
| P | Q19R17 | DE | T calcium channel alpha 1G subunit variant 25;                                                                                                                                          |
| P | Q19R17 | DR | voltage-gated calcium channel activity                                                                                                                                                  |
| P | Q1EHB4 | CC | Acts as an electroneutral and low-affinity sodium (Na <sup>+</sup> )-dependent sodium-coupled solute transporter                                                                        |
| P | Q1EHB4 | CC | Mediates electroneutral uptake of lactate, with a stoichiometry of 2 Na <sup>+</sup> for each lactate (By similarity).                                                                  |
| P | Q1EHB4 | DE | Electroneutral sodium monocarboxylate cotransporter;                                                                                                                                    |
| P | Q1EHB4 | DE | Low-affinity sodium-lactate cotransporter;                                                                                                                                              |
| P | Q1EHB4 | DE | Sodium-coupled monocarboxylate transporter 2;                                                                                                                                           |
| P | Q1LC89 | CC | Part of the ABC transporter complex HmuTUV involved in hemin import                                                                                                                     |
| P | Q1LC89 | DE | Hemin import ATP-binding protein HmuV;                                                                                                                                                  |
| P | Q1LFB1 | DR | sodium:dicarboxylate symporter activity                                                                                                                                                 |
| P | Q1LFZ8 | CC | Part of the ABC transporter complex CcmAB involved in the biogenesis of c-type cytochromes; once thought to export heme, this seems not to be the case, but its exact role is uncertain |
| P | Q1LFZ8 | DE | Heme exporter protein A 2;                                                                                                                                                              |
| P | Q1LFZ8 | DR | heme-transporting ATPase activity                                                                                                                                                       |
| P | Q1LJ08 | DR | phosphonate transmembrane-transporting ATPase activity                                                                                                                                  |
| P | Q1LKR4 | CC | Part of the ABC transporter complex CcmAB involved in the biogenesis of c-type cytochromes; once thought to export heme, this seems not to be the case, but its exact role is uncertain |
| P | Q1LKR4 | DE | Heme exporter protein A 1;                                                                                                                                                              |
| P | Q1LKR4 | DR | heme-transporting ATPase activity                                                                                                                                                       |
| P | Q1LLB5 | CC | Part of the ABC transporter complex PstSACB involved in phosphate import                                                                                                                |
| P | Q1LLB5 | DE | ABC phosphate transporter;                                                                                                                                                              |
| P | Q1LLB5 | DE | Phosphate import ATP-binding protein PstB;                                                                                                                                              |
| P | Q1LLB5 | DE | Phosphate-transporting ATPase;                                                                                                                                                          |
| P | Q1LLB5 | DR | inorganic phosphate transmembrane transporter activity                                                                                                                                  |
| P | Q1LLB5 | DR | phosphate transmembrane-transporting ATPase activity                                                                                                                                    |
| P | Q1LLP5 | DR | glycerol-3-phosphate-transporting ATPase activity                                                                                                                                       |
| P | Q1LP09 | CC | Transport of potassium into the cell (By similarity).                                                                                                                                   |
| P | Q1LP09 | DE | Probable potassium transport system protein kup;                                                                                                                                        |
| P | Q1LP09 | DR | potassium ion transmembrane transporter activity                                                                                                                                        |
| P | Q1LPJ9 | DE | Lipoprotein-releasing system ATP-binding protein LolD;                                                                                                                                  |
| P | Q1LPJ9 | DR | lipoprotein transporter activity                                                                                                                                                        |
| P | Q1LQB5 | DR | phosphonate transmembrane-transporting ATPase activity                                                                                                                                  |
| P | Q1LQF6 | CC | Part of the ABC transporter complex MetNIQ involved in methionine import                                                                                                                |
| P | Q1LQF6 | DE | Methionine import ATP-binding protein MetN;                                                                                                                                             |
| P | Q1LRW2 | DR | sodium:dicarboxylate symporter activity                                                                                                                                                 |
| P | Q1M360 | CC | Part of the ABC transporter complex RbsABCD involved in ribose import                                                                                                                   |
| P | Q1M360 | DE | Ribose import ATP-binding protein RbsA 3;                                                                                                                                               |
| P | Q1M589 | DR | glycerol-3-phosphate-transporting ATPase activity                                                                                                                                       |
| P | Q1M5X4 | CC | Part of the ABC transporter complex RbsABCD involved in ribose import                                                                                                                   |
| P | Q1M5X4 | DE | Ribose import ATP-binding protein RbsA 2;                                                                                                                                               |
| P | Q1M651 | CC | Transport of potassium into the cell (By similarity).                                                                                                                                   |
| P | Q1M651 | DE | Probable potassium transport system protein kup 3;                                                                                                                                      |
| P | Q1M651 | DR | potassium ion transmembrane transporter activity                                                                                                                                        |
| P | Q1M7R4 | CC | Part of the ABC transporter complex TauABC involved in taurine import                                                                                                                   |
| P | Q1M7R4 | DE | Taurine import ATP-binding protein TauB;                                                                                                                                                |

|   |        |    |                                                                                                                                                                                                  |
|---|--------|----|--------------------------------------------------------------------------------------------------------------------------------------------------------------------------------------------------|
| P | Q1M7R4 | DR | taurine-transporting ATPase activity                                                                                                                                                             |
| P | Q1M8E0 | CC | Part of the ABC transporter complex MetNIQ involved in methionine import                                                                                                                         |
| P | Q1M8E0 | DE | Methionine import ATP-binding protein MetN;                                                                                                                                                      |
| P | Q1M8R6 | DR | glycerol-3-phosphate-transporting ATPase activity                                                                                                                                                |
| P | Q1MA70 | DR | molybdate transmembrane-transporting ATPase activity                                                                                                                                             |
| P | Q1MAL7 | CC | Part of the ABC transporter complex CcmAB involved in the biogenesis of c-type cytochromes; once thought to export heme, this seems not to be the case, but its exact role is uncertain          |
| P | Q1MAL7 | DE | Heme exporter protein A;                                                                                                                                                                         |
| P | Q1MAL7 | DR | heme-transporting ATPase activity                                                                                                                                                                |
| P | Q1MCZ1 | CC | Part of the ABC transporter complex HmuTUV involved in hemin import                                                                                                                              |
| P | Q1MCZ1 | DE | Hemin import ATP-binding protein HmuV;                                                                                                                                                           |
| P | Q1MDR5 | DR | sodium:dicarboxylate symporter activity                                                                                                                                                          |
| P | Q1MEG2 | CC | Part of the ABC transporter complex ZnuABC involved in zinc import                                                                                                                               |
| P | Q1MEG2 | DE | Zinc import ATP-binding protein ZnuC;                                                                                                                                                            |
| P | Q1MEG2 | DR | zinc transporting ATPase activity                                                                                                                                                                |
| P | Q1MEX2 | CC | Transport of potassium into the cell (By similarity).                                                                                                                                            |
| P | Q1MEX2 | DE | Probable potassium transport system protein kup 2;                                                                                                                                               |
| P | Q1MEX2 | DR | potassium ion transmembrane transporter activity                                                                                                                                                 |
| P | Q1MHS1 | CC | Part of the ABC transporter complex RbsABCD involved in ribose import                                                                                                                            |
| P | Q1MHS1 | DE | Ribose import ATP-binding protein RbsA 1;                                                                                                                                                        |
| P | Q1MIJ4 | DE | Lipoprotein-releasing system ATP-binding protein LolD;                                                                                                                                           |
| P | Q1MIJ4 | DR | lipoprotein transporter activity                                                                                                                                                                 |
| P | Q1MIN0 | CC | Part of the ABC transporter complex PstSACB involved in phosphate import                                                                                                                         |
| P | Q1MIN0 | DE | ABC phosphate transporter 2;                                                                                                                                                                     |
| P | Q1MIN0 | DE | Phosphate import ATP-binding protein PstB 2;                                                                                                                                                     |
| P | Q1MIN0 | DE | Phosphate-transporting ATPase 2;                                                                                                                                                                 |
| P | Q1MIN0 | DR | inorganic phosphate transmembrane transporter activity                                                                                                                                           |
| P | Q1MIN0 | DR | phosphate transmembrane-transporting ATPase activity                                                                                                                                             |
| P | Q1MKT5 | CC | Transport of potassium into the cell (By similarity).                                                                                                                                            |
| P | Q1MKT5 | DE | Probable potassium transport system protein kup 1;                                                                                                                                               |
| P | Q1MKT5 | DR | potassium ion transmembrane transporter activity                                                                                                                                                 |
| P | Q1MLW4 | CC | Part of the ABC transporter complex PstSACB involved in phosphate import                                                                                                                         |
| P | Q1MLW4 | DE | ABC phosphate transporter 1;                                                                                                                                                                     |
| P | Q1MLW4 | DE | Phosphate import ATP-binding protein PstB 1;                                                                                                                                                     |
| P | Q1MLW4 | DE | Phosphate-transporting ATPase 1;                                                                                                                                                                 |
| P | Q1MLW4 | DR | inorganic phosphate transmembrane transporter activity                                                                                                                                           |
| P | Q1MLW4 | DR | phosphate transmembrane-transporting ATPase activity                                                                                                                                             |
| P | Q1MMZ3 | DR | phosphonate transmembrane-transporting ATPase activity                                                                                                                                           |
| P | Q1PE39 | CC | Magnesium transporter that mediates the influx/efflux of magnesium in a concentration-dependent manner                                                                                           |
| P | Q1PE39 | DE | Magnesium Transporter 5;                                                                                                                                                                         |
| P | Q1PE39 | DE | Magnesium transporter MRS2-6, mitochondrial;                                                                                                                                                     |
| P | Q1PE39 | DR | magnesium ion transmembrane transporter activity                                                                                                                                                 |
| P | Q1ZXJ0 | CC | Chloride channels may have several functions including the regulation of cell volume, membrane potential stabilization and signal transduction (By similarity)                                   |
| P | Q1ZXJ0 | CC | Voltage-gated chloride channel                                                                                                                                                                   |
| P | Q1ZXJ0 | DE | Chloride channel protein D;                                                                                                                                                                      |
| P | Q1ZXJ0 | DR | voltage-gated chloride channel activity                                                                                                                                                          |
| P | Q21219 | DE | Oligopeptide transporter 1;                                                                                                                                                                      |
| P | Q21339 | DE | Na <sup>+</sup> /dicarboxylate cotransporter 3;                                                                                                                                                  |
| P | Q21339 | DE | Sodium-dependent high-affinity dicarboxylate transporter 3;                                                                                                                                      |
| P | Q21339 | DR | high affinity sodium:dicarboxylate symporter activity                                                                                                                                            |
| P | Q21974 | DR | sodium channel activity                                                                                                                                                                          |
| P | Q22271 | CC | Has a role in mobility, possibly in the transport of potassium in muscles.                                                                                                                       |
| P | Q22271 | DR | potassium channel activity                                                                                                                                                                       |
| P | Q22851 | DR | sodium channel activity                                                                                                                                                                          |
| P | Q23435 | CC | Potassium channel protein that may be component of regulatory network that controls ray development and function.                                                                                |
| P | Q23435 | DE | TWiK family of potassium channels protein 9;                                                                                                                                                     |
| P | Q23435 | DR | potassium channel activity                                                                                                                                                                       |
| P | Q24046 | CC | The beta subunit regulates, through assembly of alpha/beta heterodimers, the number of sodium pumps transported to the plasma membrane.                                                          |
| P | Q24046 | CC | This is the non-catalytic component of the active enzyme, which catalyzes the hydrolysis of ATP coupled with the exchange of Na <sup>+</sup> and K <sup>+</sup> ions across the plasma membrane. |

|   |        |    |                                                                                                                                                                                                                                                                                                     |
|---|--------|----|-----------------------------------------------------------------------------------------------------------------------------------------------------------------------------------------------------------------------------------------------------------------------------------------------------|
| P | Q24046 | CC | This is the non-catalytic component of the active enzyme, which catalyzes the hydrolysis of ATP coupled with the exchange of Na <sup>+</sup> and K <sup>+</sup> ions across the plasma membrane.                                                                                                    |
| P | Q24046 | DE | Sodium/potassium-dependent ATPase subunit beta-1;                                                                                                                                                                                                                                                   |
| P | Q24046 | DE | Sodium/potassium-dependent ATPase subunit beta-1;                                                                                                                                                                                                                                                   |
| P | Q24046 | DE | Sodium/potassium-transporting ATPase subunit beta-1;                                                                                                                                                                                                                                                |
| P | Q24046 | DE | Sodium/potassium-transporting ATPase subunit beta-1;                                                                                                                                                                                                                                                |
| P | Q24046 | DR | sodium:potassium-exchanging ATPase activity                                                                                                                                                                                                                                                         |
| P | Q24046 | DR | sodium:potassium-exchanging ATPase activity                                                                                                                                                                                                                                                         |
| P | Q24048 | CC | The beta subunit regulates, through assembly of alpha/beta heterodimers, the number of sodium pumps transported to the plasma membrane.                                                                                                                                                             |
| P | Q24048 | CC | This is the non-catalytic component of the active enzyme, which catalyzes the hydrolysis of ATP coupled with the exchange of Na <sup>+</sup> and K <sup>+</sup> ions across the plasma membrane.                                                                                                    |
| P | Q24048 | CC | This is the non-catalytic component of the active enzyme, which catalyzes the hydrolysis of ATP coupled with the exchange of Na <sup>+</sup> and K <sup>+</sup> ions across the plasma membrane.                                                                                                    |
| P | Q24048 | DE | Sodium/potassium-dependent ATPase subunit beta-2;                                                                                                                                                                                                                                                   |
| P | Q24048 | DE | Sodium/potassium-dependent ATPase subunit beta-2;                                                                                                                                                                                                                                                   |
| P | Q24048 | DE | Sodium/potassium-transporting ATPase subunit beta-2;                                                                                                                                                                                                                                                |
| P | Q24048 | DE | Sodium/potassium-transporting ATPase subunit beta-2;                                                                                                                                                                                                                                                |
| P | Q24048 | DR | sodium:potassium-exchanging ATPase activity                                                                                                                                                                                                                                                         |
| P | Q24048 | DR | sodium:potassium-exchanging ATPase activity                                                                                                                                                                                                                                                         |
| P | Q24270 | CC | Voltage-sensitive calcium channels (VSCC) mediate the entry of calcium ions into excitable cells and are also involved in a variety of calcium-dependent processes, including muscle contraction, hormone or neurotransmitter release, gene expression, cell motility, cell division and cell death |
| P | Q24270 | DE | Voltage-dependent calcium channel type D subunit alpha-1;                                                                                                                                                                                                                                           |
| P | Q24270 | DR | voltage-gated calcium channel activity                                                                                                                                                                                                                                                              |
| P | Q24352 | CC | GABA, an inhibitory neurotransmitter, mediates neuronal inhibition by binding to the GABA receptor and opening an integral chloride channel                                                                                                                                                         |
| P | Q24352 | DR | chloride channel activity                                                                                                                                                                                                                                                                           |
| P | Q25011 | DE | FMRFamide-activated amiloride-sensitive sodium channel;                                                                                                                                                                                                                                             |
| P | Q25011 | DR | sodium channel activity                                                                                                                                                                                                                                                                             |
| P | Q2FFH9 | DE | Na <sup>+</sup> /dicarboxylate symporter;                                                                                                                                                                                                                                                           |
| P | Q2FFH9 | DE | Sodium-dependent dicarboxylate transporter sdcS;                                                                                                                                                                                                                                                    |
| P | Q2FQC0 | CC | Transport of potassium into the cell (By similarity).                                                                                                                                                                                                                                               |
| P | Q2FQC0 | DE | Probable potassium transport system protein kup;                                                                                                                                                                                                                                                    |
| P | Q2FQC0 | DR | potassium ion transmembrane transporter activity                                                                                                                                                                                                                                                    |
| P | Q2FTF8 | CC | Part of the ABC transporter complex PstSACB involved in phosphate import                                                                                                                                                                                                                            |
| P | Q2FTF8 | DE | ABC phosphate transporter;                                                                                                                                                                                                                                                                          |
| P | Q2FTF8 | DE | Phosphate import ATP-binding protein PstB;                                                                                                                                                                                                                                                          |
| P | Q2FTF8 | DE | Phosphate-transporting ATPase;                                                                                                                                                                                                                                                                      |
| P | Q2FTF8 | DR | inorganic phosphate transmembrane transporter activity                                                                                                                                                                                                                                              |
| P | Q2FTF8 | DR | phosphate transmembrane-transporting ATPase activity                                                                                                                                                                                                                                                |
| P | Q2FZR3 | DE | Oligopeptide ABC transporter, substrate-binding protein, putative;                                                                                                                                                                                                                                  |
| P | Q2FZR4 | DE | Oligopeptide ABC transporter, ATP-binding protein, putative;                                                                                                                                                                                                                                        |
| P | Q2G140 | CC | Multidrug resistance efflux protein involved in transporting several clinically relevant monovalent and divalent biocides and the fluoroquinolone antimicrobial agents norfloxacin and ciprofloxacin                                                                                                |
| P | Q2GE91 | DE | Lipoprotein-releasing system ATP-binding protein LolD;                                                                                                                                                                                                                                              |
| P | Q2GE91 | DR | lipoprotein transporter activity                                                                                                                                                                                                                                                                    |
| P | Q2GFZ6 | CC | Part of the ABC transporter complex ZnuABC involved in zinc import                                                                                                                                                                                                                                  |
| P | Q2GFZ6 | DE | Zinc import ATP-binding protein ZnuC;                                                                                                                                                                                                                                                               |
| P | Q2GFZ6 | DR | zinc transporting ATPase activity                                                                                                                                                                                                                                                                   |
| P | Q2GHT4 | DE | Lipoprotein-releasing system ATP-binding protein LolD;                                                                                                                                                                                                                                              |
| P | Q2GHT4 | DR | lipoprotein transporter activity                                                                                                                                                                                                                                                                    |
| P | Q2GJA5 | CC | Part of the ABC transporter complex ZnuABC involved in zinc import                                                                                                                                                                                                                                  |
| P | Q2GJA5 | DE | Zinc import ATP-binding protein ZnuC;                                                                                                                                                                                                                                                               |
| P | Q2GJA5 | DR | zinc transporting ATPase activity                                                                                                                                                                                                                                                                   |
| P | Q2K0S7 | CC | Part of the ABC transporter complex RbsABCD involved in ribose import                                                                                                                                                                                                                               |
| P | Q2K0S7 | DE | Ribose import ATP-binding protein RbsA 3;                                                                                                                                                                                                                                                           |
| P | Q2K164 | CC | Part of the ABC transporter complex TauABC involved in taurine import                                                                                                                                                                                                                               |
| P | Q2K164 | DE | Taurine import ATP-binding protein TauB;                                                                                                                                                                                                                                                            |
| P | Q2K164 | DR | taurine-transporting ATPase activity                                                                                                                                                                                                                                                                |
| P | Q2K1C8 | DR | glycerol-3-phosphate-transporting ATPase activity                                                                                                                                                                                                                                                   |
| P | Q2K204 | CC | Part of the ABC transporter complex RbsABCD involved in ribose import                                                                                                                                                                                                                               |
| P | Q2K204 | DE | Ribose import ATP-binding protein RbsA 2;                                                                                                                                                                                                                                                           |

|   |        |    |                                                                                                                                                                                         |
|---|--------|----|-----------------------------------------------------------------------------------------------------------------------------------------------------------------------------------------|
| P | Q2K284 | CC | Part of the ABC transporter complex MetNIQ involved in methionine import                                                                                                                |
| P | Q2K284 | DE | Methionine import ATP-binding protein MetN;                                                                                                                                             |
| P | Q2K219 | CC | Transport of potassium into the cell (By similarity).                                                                                                                                   |
| P | Q2K219 | DE | Probable potassium transport system protein kup 3;                                                                                                                                      |
| P | Q2K219 | DR | potassium ion transmembrane transporter activity                                                                                                                                        |
| P | Q2K2X0 | DR | molybdate transmembrane-transporting ATPase activity                                                                                                                                    |
| P | Q2K396 | CC | Part of the ABC transporter complex CcmAB involved in the biogenesis of c-type cytochromes; once thought to export heme, this seems not to be the case, but its exact role is uncertain |
| P | Q2K396 | DE | Heme exporter protein A;                                                                                                                                                                |
| P | Q2K396 | DR | heme-transporting ATPase activity                                                                                                                                                       |
| P | Q2K4V4 | DR | glycerol-3-phosphate-transporting ATPase activity                                                                                                                                       |
| P | Q2K551 | CC | Part of the ABC transporter complex HmuTUV involved in hemin import                                                                                                                     |
| P | Q2K551 | DE | Hemin import ATP-binding protein HmuV;                                                                                                                                                  |
| P | Q2K5Z8 | DR | sodium:dicarboxylate symporter activity                                                                                                                                                 |
| P | Q2K6L3 | DR | glycerol-3-phosphate-transporting ATPase activity                                                                                                                                       |
| P | Q2K6Q4 | CC | Part of the ABC transporter complex ZnuABC involved in zinc import                                                                                                                      |
| P | Q2K6Q4 | DE | Zinc import ATP-binding protein ZnuC;                                                                                                                                                   |
| P | Q2K6Q4 | DR | zinc transporting ATPase activity                                                                                                                                                       |
| P | Q2K711 | CC | Transport of potassium into the cell (By similarity).                                                                                                                                   |
| P | Q2K711 | DE | Probable potassium transport system protein kup 2;                                                                                                                                      |
| P | Q2K711 | DR | potassium ion transmembrane transporter activity                                                                                                                                        |
| P | Q2K9A3 | CC | Part of the ABC transporter complex RbsABCD involved in ribose import                                                                                                                   |
| P | Q2K9A3 | DE | Ribose import ATP-binding protein RbsA 1;                                                                                                                                               |
| P | Q2K9R2 | DE | Lipoprotein-releasing system ATP-binding protein LolD;                                                                                                                                  |
| P | Q2K9R2 | DR | lipoprotein transporter activity                                                                                                                                                        |
| P | Q2KBW4 | CC | Transport of potassium into the cell (By similarity).                                                                                                                                   |
| P | Q2KBW4 | DE | Probable potassium transport system protein kup 1;                                                                                                                                      |
| P | Q2KBW4 | DR | potassium ion transmembrane transporter activity                                                                                                                                        |
| P | Q2KCN1 | CC | Na <sup>+</sup> /H <sup>+</sup> antiporter that excludes sodium in exchange for external protons (By similarity).                                                                       |
| P | Q2KCN1 | DE | Na <sup>+</sup> /H <sup>+</sup> antiporter nhaA;                                                                                                                                        |
| P | Q2KCN1 | DE | Sodium/proton antiporter nhaA;                                                                                                                                                          |
| P | Q2KCV5 | CC | Part of the ABC transporter complex PstSACB involved in phosphate import                                                                                                                |
| P | Q2KCV5 | DE | ABC phosphate transporter;                                                                                                                                                              |
| P | Q2KCV5 | DE | Phosphate import ATP-binding protein PstB;                                                                                                                                              |
| P | Q2KCV5 | DE | Phosphate-transporting ATPase;                                                                                                                                                          |
| P | Q2KCV5 | DR | inorganic phosphate transmembrane transporter activity                                                                                                                                  |
| P | Q2KCV5 | DR | phosphate transmembrane-transporting ATPase activity                                                                                                                                    |
| P | Q2KDV1 | DR | phosphonate transmembrane-transporting ATPase activity                                                                                                                                  |
| P | Q2LTG0 | CC | Part of the ABC transporter complex PstSACB involved in phosphate import                                                                                                                |
| P | Q2LTG0 | DE | ABC phosphate transporter;                                                                                                                                                              |
| P | Q2LTG0 | DE | Phosphate import ATP-binding protein PstB;                                                                                                                                              |
| P | Q2LTG0 | DE | Phosphate-transporting ATPase;                                                                                                                                                          |
| P | Q2LTG0 | DR | inorganic phosphate transmembrane transporter activity                                                                                                                                  |
| P | Q2LTG0 | DR | phosphate transmembrane-transporting ATPase activity                                                                                                                                    |
| P | Q2LVM2 | DE | Lipoprotein-releasing system ATP-binding protein LolD;                                                                                                                                  |
| P | Q2LVM2 | DR | lipoprotein transporter activity                                                                                                                                                        |
| P | Q2M3M2 | CC | involved in sodium-dependent transport of D-mannose, D- glucose and D-fructose                                                                                                          |
| P | Q2M3M2 | CC | involved in sodium-dependent transport of D-mannose, D- glucose and D-fructose                                                                                                          |
| P | Q2M3M2 | DE | Na <sup>+</sup> /glucose cotransporter 4;                                                                                                                                               |
| P | Q2M3M2 | DE | Na <sup>+</sup> /glucose cotransporter 4;                                                                                                                                               |
| P | Q2M3M2 | DE | Sodium/glucose cotransporter 4;                                                                                                                                                         |
| P | Q2M3M2 | DE | Sodium/glucose cotransporter 4;                                                                                                                                                         |
| P | Q2M3M2 | DR | low-affinity glucose:sodium symporter activity                                                                                                                                          |
| P | Q2M3M2 | DR | low-affinity glucose:sodium symporter activity                                                                                                                                          |
| P | Q2MDH1 | DE | Glucose/xylose facilitator 1;                                                                                                                                                           |
| P | Q2NK31 | CC | Part of the ABC transporter complex PotABCD involved in spermidine/putrescine import                                                                                                    |
| P | Q2NK31 | CC | Part of the ABC transporter complex PotABCD involved in spermidine/putrescine import                                                                                                    |
| P | Q2NK31 | DE | Spermidine/putrescine import ATP-binding protein PotA;                                                                                                                                  |
| P | Q2NK31 | DE | Spermidine/putrescine import ATP-binding protein PotA;                                                                                                                                  |
| P | Q2NQ98 | CC | Responsible for the low-affinity transport of potassium into the cell, with the probable concomitant uptake of protons (symport system) (By similarity).                                |
| P | Q2NQ98 | DE | Kup system potassium uptake protein;                                                                                                                                                    |
| P | Q2NQ98 | DE | Low affinity potassium transport system protein kup;                                                                                                                                    |
| P | Q2NQ98 | DR | potassium ion transmembrane transporter activity                                                                                                                                        |

|   |        |    |                                                                                                                                                                                                            |
|---|--------|----|------------------------------------------------------------------------------------------------------------------------------------------------------------------------------------------------------------|
| P | Q2NQF9 | CC | Mediates influx of magnesium ions (By similarity).                                                                                                                                                         |
| P | Q2NQF9 | DE | Magnesium transport protein CorA;                                                                                                                                                                          |
| P | Q2NQF9 | DR | cobalt ion transmembrane transporter activity                                                                                                                                                              |
| P | Q2NQF9 | DR | magnesium ion transmembrane transporter activity                                                                                                                                                           |
| P | Q2NRN5 | CC | Part of the ABC transporter complex MetNIQ involved in methionine import                                                                                                                                   |
| P | Q2NRN5 | DE | Methionine import ATP-binding protein MetN;                                                                                                                                                                |
| P | Q2NRN5 | DR | D-methionine transmembrane transporter activity                                                                                                                                                            |
| P | Q2NSG3 | CC | Part of the ABC transporter complex CcmAB involved in the biogenesis of c-type cytochromes; once thought to export heme, this seems not to be the case, but its exact role is uncertain                    |
| P | Q2NSG3 | DE | Heme exporter protein A;                                                                                                                                                                                   |
| P | Q2NSG3 | DR | heme-transporting ATPase activity                                                                                                                                                                          |
| P | Q2NSR0 | CC | Part of the ABC transporter complex HmuTUV involved in hemin import                                                                                                                                        |
| P | Q2NSR0 | DE | Hemin import ATP-binding protein HmuV;                                                                                                                                                                     |
| P | Q2NTI7 | CC | Part of the ABC transporter complex ZnuABC involved in zinc import                                                                                                                                         |
| P | Q2NTI7 | DE | Zinc import ATP-binding protein ZnuC;                                                                                                                                                                      |
| P | Q2NTI7 | DR | zinc transporting ATPase activity                                                                                                                                                                          |
| P | Q2NU23 | DE | Lipoprotein-releasing system ATP-binding protein LolD;                                                                                                                                                     |
| P | Q2NU23 | DR | lipoprotein transporter activity                                                                                                                                                                           |
| P | Q2NVW9 | CC | Part of the ABC transporter complex ThiBPQ involved in thiamine import                                                                                                                                     |
| P | Q2NVW9 | DE | Thiamine import ATP-binding protein ThiQ;                                                                                                                                                                  |
| P | Q2NVY9 | CC | Na <sup>+</sup> /H <sup>+</sup> antiporter that extrudes sodium in exchange for external protons (By similarity)                                                                                           |
| P | Q2NVY9 | DE | Na <sup>+</sup> /H <sup>+</sup> antiporter nhaA;                                                                                                                                                           |
| P | Q2NVY9 | DE | Sodium/proton antiporter nhaA;                                                                                                                                                                             |
| P | Q2NW73 | CC | One of the components of the high-affinity ATP-driven potassium transport (or KDP) system, which catalyzes the hydrolysis of ATP coupled with the exchange of hydrogen and potassium ions                  |
| P | Q2NW73 | DE | Potassium-binding and translocating subunit C;                                                                                                                                                             |
| P | Q2NW73 | DE | Potassium-translocating ATPase C chain;                                                                                                                                                                    |
| P | Q2NW73 | DE | Potassium-transporting ATPase C chain;                                                                                                                                                                     |
| P | Q2NW73 | DR | potassium-transporting ATPase activity                                                                                                                                                                     |
| P | Q2QWW7 | DE | Phosphate transporter 4;7;                                                                                                                                                                                 |
| P | Q2RV87 | CC | One of the components of the high-affinity ATP-driven potassium transport (or KDP) system, which catalyzes the hydrolysis of ATP coupled with the exchange of hydrogen and potassium ions                  |
| P | Q2RV87 | DE | Potassium-binding and translocating subunit C;                                                                                                                                                             |
| P | Q2RV87 | DE | Potassium-translocating ATPase C chain;                                                                                                                                                                    |
| P | Q2RV87 | DE | Potassium-transporting ATPase C chain;                                                                                                                                                                     |
| P | Q2RV87 | DR | potassium-transporting ATPase activity                                                                                                                                                                     |
| P | Q2RV89 | CC | One of the components of the high-affinity ATP-driven potassium transport (or KDP) system, which catalyzes the hydrolysis of ATP coupled with the exchange of hydrogen and potassium ions (By similarity). |
| P | Q2RV89 | DE | Potassium-binding and translocating subunit A;                                                                                                                                                             |
| P | Q2RV89 | DE | Potassium-translocating ATPase A chain;                                                                                                                                                                    |
| P | Q2RV89 | DE | Potassium-transporting ATPase A chain;                                                                                                                                                                     |
| P | Q2RV89 | DR | potassium-transporting ATPase activity                                                                                                                                                                     |
| P | Q2RWA3 | CC | Part of the ABC transporter complex MetNIQ involved in methionine import                                                                                                                                   |
| P | Q2RWA3 | DE | Methionine import ATP-binding protein MetN;                                                                                                                                                                |
| P | Q2RWI9 | DR | molybdate transmembrane-transporting ATPase activity                                                                                                                                                       |
| P | Q2RWU0 | CC | Part of the ABC transporter complex PstSACB involved in phosphate import                                                                                                                                   |
| P | Q2RWU0 | DE | ABC phosphate transporter;                                                                                                                                                                                 |
| P | Q2RWU0 | DE | Phosphate import ATP-binding protein PstB;                                                                                                                                                                 |
| P | Q2RWU0 | DE | Phosphate-transporting ATPase;                                                                                                                                                                             |
| P | Q2RWU0 | DR | inorganic phosphate transmembrane transporter activity                                                                                                                                                     |
| P | Q2RWU0 | DR | phosphate transmembrane-transporting ATPase activity                                                                                                                                                       |
| P | Q2RY62 | CC | Na <sup>+</sup> /H <sup>+</sup> antiporter that extrudes sodium in exchange for external protons (By similarity)                                                                                           |
| P | Q2RY62 | DE | Na <sup>+</sup> /H <sup>+</sup> antiporter nhaA;                                                                                                                                                           |
| P | Q2RY62 | DE | Sodium/proton antiporter nhaA;                                                                                                                                                                             |
| P | Q2RYF0 | CC | Part of the ABC transporter complex CcmAB involved in the biogenesis of c-type cytochromes; once thought to export heme, this seems not to be the case, but its exact role is uncertain                    |
| P | Q2RYF0 | DE | Heme exporter protein A;                                                                                                                                                                                   |
| P | Q2RYF0 | DR | heme-transporting ATPase activity                                                                                                                                                                          |
| P | Q2SR40 | DR | phosphonate transmembrane-transporting ATPase activity                                                                                                                                                     |
| P | Q2SS06 | CC | Part of the ABC transporter complex PstSACB involved in phosphate import                                                                                                                                   |



|   |        |    |                                                                                                                                                                                    |
|---|--------|----|------------------------------------------------------------------------------------------------------------------------------------------------------------------------------------|
| P | Q2SS06 | DE | ABC phosphate transporter;                                                                                                                                                         |
| P | Q2SS06 | DE | Phosphate import ATP-binding protein PstB;                                                                                                                                         |
| P | Q2SS06 | DE | Phosphate-transporting ATPase;                                                                                                                                                     |
| P | Q2SS06 | DR | inorganic phosphate transmembrane transporter activity                                                                                                                             |
| P | Q2SS06 | DR | phosphate transmembrane-transporting ATPase activity                                                                                                                               |
| P | Q2SSS4 | CC | Part of the ABC transporter complex PotABCD involved in spermidine/putrescine import                                                                                               |
| P | Q2SSS4 | CC | Part of the ABC transporter complex PotABCD involved in spermidine/putrescine import                                                                                               |
| P | Q2SSS4 | DE | Spermidine/putrescine import ATP-binding protein PotA;                                                                                                                             |
| P | Q2SSS4 | DE | Spermidine/putrescine import ATP-binding protein PotA;                                                                                                                             |
| P | Q2TAC4 | DE | Calcium channel, voltage-dependent, T type, alpha 1G subunit;                                                                                                                      |
| P | Q2TAC4 | DE | T calcium channel alpha 1G subunit variant 57;                                                                                                                                     |
| P | Q2TAC4 | DR | voltage-gated calcium channel activity                                                                                                                                             |
| P | Q2Y0W8 | CC | Mediates electroneutral sodium- and carbonate-dependent chloride-HCO <sub>3</sub> <sup>-</sup> exchange with a Na <sup>+</sup> :HCO <sub>3</sub> <sup>-</sup> stoichiometry of 2:1 |
| P | Q2Y0W8 | DE | Electroneutral Na <sup>+</sup> -driven Cl-HCO <sub>3</sub> exchanger;                                                                                                              |
| P | Q2YDA1 | DR | potassium channel activity                                                                                                                                                         |
| P | Q304A0 | CC | Low-affinity magnesium transporter that mediates the influx of magnesium.                                                                                                          |
| P | Q304A0 | DE | Magnesium Transporter 7;                                                                                                                                                           |
| P | Q304A0 | DE | Magnesium transporter MRS2-7;                                                                                                                                                      |
| P | Q30PC0 | CC | Part of the ABC transporter complex PstSACB involved in phosphate import                                                                                                           |
| P | Q30PC0 | DE | ABC phosphate transporter;                                                                                                                                                         |
| P | Q30PC0 | DE | Phosphate import ATP-binding protein PstB;                                                                                                                                         |
| P | Q30PC0 | DE | Phosphate-transporting ATPase;                                                                                                                                                     |
| P | Q30PC0 | DR | inorganic phosphate transmembrane transporter activity                                                                                                                             |
| P | Q30PC0 | DR | phosphate transmembrane-transporting ATPase activity                                                                                                                               |
| P | Q30PM3 | CC | Na <sup>+</sup> /H <sup>+</sup> antiporter that excludes sodium in exchange for external protons (by similarity)                                                                   |
| P | Q30PM3 | DE | Na <sup>+</sup> /H <sup>+</sup> antiporter nhaA;                                                                                                                                   |
| P | Q30PM3 | DE | Sodium/proton antiporter nhaA;                                                                                                                                                     |
| P | Q31125 | DE | Zinc transporter SLC39A7;                                                                                                                                                          |
| P | Q31DV4 | DR | phosphonate transmembrane-transporting ATPase activity                                                                                                                             |
| P | Q31GF5 | DE | Lipoprotein-releasing system ATP-binding protein LolD;                                                                                                                             |
| P | Q31GF5 | DR | lipoprotein transporter activity                                                                                                                                                   |
| P | Q31I51 | CC | Part of the ABC transporter complex ZnuABC involved in zinc import                                                                                                                 |
| P | Q31I51 | DE | Zinc import ATP-binding protein ZnuC;                                                                                                                                              |
| P | Q31I51 | DR | zinc transporting ATPase activity                                                                                                                                                  |
| P | Q31I88 | CC | Part of the ABC transporter complex PstSACB involved in phosphate import                                                                                                           |
| P | Q31I88 | DE | ABC phosphate transporter;                                                                                                                                                         |
| P | Q31I88 | DE | Phosphate import ATP-binding protein PstB;                                                                                                                                         |
| P | Q31I88 | DE | Phosphate-transporting ATPase;                                                                                                                                                     |
| P | Q31I88 | DR | inorganic phosphate transmembrane transporter activity                                                                                                                             |
| P | Q31I88 | DR | phosphate transmembrane-transporting ATPase activity                                                                                                                               |
| P | Q31J97 | CC | Part of the ABC transporter complex HmuTUV involved in hemin import                                                                                                                |
| P | Q31J97 | DE | Hemin import ATP-binding protein HmuV;                                                                                                                                             |
| P | Q37145 | CC | This magnesium-dependent enzyme catalyzes the hydrolysis of ATP coupled with the translocation of calcium from the cytosol out of the cell or into organelles                      |
| P | Q37145 | DE | Ca <sup>2+</sup> -ATPase isoform 1;                                                                                                                                                |
| P | Q37145 | DE | Calcium-transporting ATPase 1, chloroplastic;                                                                                                                                      |
| P | Q37145 | DR | calcium channel activity                                                                                                                                                           |
| P | Q37145 | DR | calcium-transporting ATPase activity                                                                                                                                               |
| P | Q38849 | CC | Highly selective inward-rectifying potassium channel                                                                                                                               |
| P | Q38849 | CC | This voltage-dependent channel could mediate long-term potassium influx into guard cells leading to stomatal opening                                                               |
| P | Q38849 | DE | Potassium channel KAT2;                                                                                                                                                            |
| P | Q38849 | DR | voltage-gated potassium channel activity                                                                                                                                           |
| P | Q38856 | CC | Acts as the principal regulator of iron homeostasis in planta                                                                                                                      |
| P | Q38856 | CC | Also mediates the heavy metals uptake under iron-deficiency by its ability to transport cobalt, cadmium, manganese and/or zinc ions.                                               |
| P | Q38856 | CC | Also mediates the heavy metals uptake under iron-deficiency by its ability to transport cobalt, cadmium, manganese and/or zinc ions.                                               |
| P | Q38856 | CC | High-affinity iron transporter that plays a key role in the uptake of iron from the rhizosphere across the plasma membrane in the root epidermal layer                             |
| P | Q38856 | DE | Fe(II) transport protein 1;                                                                                                                                                        |
| P | Q38856 | DE | Iron-regulated transporter 1;                                                                                                                                                      |
| P | Q38856 | DR | iron ion transmembrane transporter activity                                                                                                                                        |
| P | Q38856 | DR | zinc ion transmembrane transporter activity                                                                                                                                        |

|   |        |    |                                                                                                                                                                                                 |
|---|--------|----|-------------------------------------------------------------------------------------------------------------------------------------------------------------------------------------------------|
| P | Q38898 | CC | Dephosphorylation by PP2CA not only leads to the inhibition of potassium currents but also to an increase of the voltage- dependence of the channel.                                            |
| P | Q38898 | CC | Highly selective and weak inward-rectifying potassium channel                                                                                                                                   |
| P | Q38898 | CC | Plays a role in both loading and unloading potassium into/from the phloem sap                                                                                                                   |
| P | Q38898 | DE | Potassium channel AKT2/3;                                                                                                                                                                       |
| P | Q38898 | DR | voltage-gated potassium channel activity                                                                                                                                                        |
| P | Q38954 | CC | Involved in inorganic phosphate (orthophosphate, Pi) uptake in green parts of plants in Pi-sufficient conditions                                                                                |
| P | Q38954 | DE | Inorganic phosphate transporter 2-1, chloroplastic;                                                                                                                                             |
| P | Q38954 | DR | inorganic phosphate transmembrane transporter activity                                                                                                                                          |
| P | Q38954 | DR | low affinity phosphate transmembrane transporter activity                                                                                                                                       |
| P | Q38998 | CC | Highly selective inward-rectifying potassium channel that mediate potassium uptake by plant roots in response to low K <sup>+</sup> conditions, by a calcium-, CBL-, and CIPK-dependent pathway |
| P | Q38998 | DE | Potassium channel AKT1;                                                                                                                                                                         |
| P | Q38998 | DR | inward rectifier potassium channel activity                                                                                                                                                     |
| P | Q39002 | DE | ADP/ATP carrier protein 1, chloroplastic;                                                                                                                                                       |
| P | Q39002 | DE | ADP/ATP translocase 1;                                                                                                                                                                          |
| P | Q39002 | DE | ADP/ATP translocase 1;                                                                                                                                                                          |
| P | Q39002 | DR | ATP:ADP antiporter activity                                                                                                                                                                     |
| P | Q39002 | DR | ATP:ADP antiporter activity                                                                                                                                                                     |
| P | Q39065 | CC | Copper transporter involved in copper acquisition and transport in leaves                                                                                                                       |
| P | Q39065 | CC | Required for copper homeostasis and normal plant growth and development.                                                                                                                        |
| P | Q39065 | DE | Copper transporter 1;                                                                                                                                                                           |
| P | Q39065 | DR | copper ion transmembrane transporter activity                                                                                                                                                   |
| P | Q39128 | CC | Highly selective inward-rectifying potassium channel                                                                                                                                            |
| P | Q39128 | CC | This voltage-gated channel could mediate long-term potassium influx into guard cells leading to stomatal opening                                                                                |
| P | Q39128 | DE | Potassium channel KAT1;                                                                                                                                                                         |
| P | Q39128 | DR | voltage-gated potassium channel activity                                                                                                                                                        |
| P | Q39196 | CC | Aquaporins facilitate the transport of water and small neutral solutes across cell membranes (By similarity).                                                                                   |
| P | Q39228 | CC | Can transport glucose, methylglucose, galactose, xylose and mannose, but not fructose                                                                                                           |
| P | Q39228 | CC | Mediates an active uptake of hexoses, probably by sugar/hydrogen symport                                                                                                                        |
| P | Q39228 | DE | Sugar transport protein 4;                                                                                                                                                                      |
| P | Q39231 | CC | Required for apoplastic phloem sucrose loading in source tissues (e.g leaves) in order to transport it to sink tissues (e.g                                                                     |
| P | Q39231 | CC | Responsible for the transport of sucrose into the cell, with the concomitant uptake of protons (symport system)                                                                                 |
| P | Q39231 | DE | Sucrose permease 2;                                                                                                                                                                             |
| P | Q39231 | DE | Sucrose transport protein SUC2;                                                                                                                                                                 |
| P | Q39231 | DE | Sucrose transporter 1;                                                                                                                                                                          |
| P | Q39231 | DE | Sucrose-proton symporter 2;                                                                                                                                                                     |
| P | Q39231 | DR | sucrose:hydrogen symporter activity                                                                                                                                                             |
| P | Q39232 | CC | Required for normal pollen germination and anthocyanin accumulation induced by sucrose.                                                                                                         |
| P | Q39232 | CC | Responsible for the transport of sucrose into the cell, with the concomitant uptake of protons (symport system)                                                                                 |
| P | Q39232 | DE | Sucrose permease 1;                                                                                                                                                                             |
| P | Q39232 | DE | Sucrose transport protein SUC1;                                                                                                                                                                 |
| P | Q39232 | DE | Sucrose-proton symporter 1;                                                                                                                                                                     |
| P | Q39232 | DR | sucrose:hydrogen symporter activity                                                                                                                                                             |
| P | Q39253 | CC | Translocates Ca <sup>2+</sup> and other metal ions into vacuoles using the proton gradient formed by H <sup>+</sup> -ATPase and H <sup>+</sup> -pyrophosphatase                                 |
| P | Q39253 | DE | Ca <sup>2+</sup> /H <sup>+</sup> antiporter CAX1;                                                                                                                                               |
| P | Q39253 | DE | Ca <sup>2+</sup> /H <sup>+</sup> exchanger 1;                                                                                                                                                   |
| P | Q39253 | DR | calcium:hydrogen antiporter activity                                                                                                                                                            |
| P | Q39254 | CC | Translocates Ca <sup>2+</sup> and other metal ions into vacuoles using the proton gradient formed by H <sup>+</sup> -ATPase and H <sup>+</sup> -pyrophosphatase.                                |
| P | Q39254 | DE | Ca <sup>2+</sup> /H <sup>+</sup> antiporter CAX2;                                                                                                                                               |
| P | Q39254 | DE | Ca <sup>2+</sup> /H <sup>+</sup> exchanger 2;                                                                                                                                                   |
| P | Q39254 | DR | calcium:hydrogen antiporter activity                                                                                                                                                            |
| P | Q39608 | DE | Nitrate transporter component;                                                                                                                                                                  |
| P | Q3A1R2 | CC | Na <sup>+</sup> /H <sup>+</sup> antiporter that extrudes sodium in exchange for external protons (By similarity)                                                                                |
| P | Q3A1R2 | DE | Na <sup>+</sup> /H <sup>+</sup> antiporter nhaA 2;                                                                                                                                              |

|   |        |    |                                                                                                                   |
|---|--------|----|-------------------------------------------------------------------------------------------------------------------|
| P | Q3A1R2 | DE | Sodium/proton antiporter nhaA 2;                                                                                  |
| P | Q3A4S1 | CC | Na <sup>+</sup> /H <sup>+</sup> antiporter that extrudes sodium in exchange for external protons (By similarity). |
| P | Q3A4S1 | DE | Na <sup>+</sup> /H <sup>+</sup> antiporter nhaA 1;                                                                |
| P | Q3A4S1 | DE | Sodium/proton antiporter nhaA 1;                                                                                  |
| P | Q3A558 | DE | Lipoprotein-releasing system ATP-binding protein LolD;                                                            |
| P | Q3A558 | DR | lipoprotein transporter activity                                                                                  |
| P | Q3A6U0 | CC | Part of the ABC transporter complex PstSACB involved in phosphate import                                          |
| P | Q3A6U0 | DE | ABC phosphate transporter;                                                                                        |
| P | Q3A6U0 | DE | Phosphate import ATP-binding protein PstB;                                                                        |
| P | Q3A6U0 | DE | Phosphate-transporting ATPase;                                                                                    |
| P | Q3A6U0 | DR | inorganic phosphate transmembrane transporter activity                                                            |
| P | Q3A6U0 | DR | phosphate transmembrane-transporting ATPase activity                                                              |
| P | Q3A9G5 | CC | Part of the ABC transporter complex MetNIQ involved in methionine import                                          |
| P | Q3A9G5 | DE | Methionine import ATP-binding protein MetN;                                                                       |
| P | Q3AAA4 | CC | Part of the ABC transporter complex PstSACB involved in phosphate import                                          |
| P | Q3AAA4 | DE | ABC phosphate transporter;                                                                                        |
| P | Q3AAA4 | DE | Phosphate import ATP-binding protein PstB;                                                                        |
| P | Q3AAA4 | DE | Phosphate-transporting ATPase;                                                                                    |
| P | Q3AAA4 | DR | inorganic phosphate transmembrane transporter activity                                                            |
| P | Q3AAA4 | DR | phosphate transmembrane-transporting ATPase activity                                                              |
| P | Q3AJS9 | CC | Part of the ABC transporter complex PstSACB involved in phosphate import                                          |
| P | Q3AJS9 | DE | ABC phosphate transporter;                                                                                        |
| P | Q3AJS9 | DE | Phosphate import ATP-binding protein PstB;                                                                        |
| P | Q3AJS9 | DE | Phosphate-transporting ATPase;                                                                                    |
| P | Q3AJS9 | DR | inorganic phosphate transmembrane transporter activity                                                            |
| P | Q3AJS9 | DR | phosphate transmembrane-transporting ATPase activity                                                              |
| P | Q3APU9 | CC | Transport of potassium into the cell (By similarity).                                                             |
| P | Q3APU9 | DE | Probable potassium transport system protein kup;                                                                  |
| P | Q3APU9 | DR | potassium ion transmembrane transporter activity                                                                  |
| P | Q3ARY3 | DE | Lipoprotein-releasing system ATP-binding protein LolD 2;                                                          |
| P | Q3ARY3 | DR | lipoprotein transporter activity                                                                                  |
| P | Q3ATA4 | CC | Part of the ABC transporter complex PstSACB involved in phosphate import                                          |
| P | Q3ATA4 | DE | ABC phosphate transporter;                                                                                        |
| P | Q3ATA4 | DE | Phosphate import ATP-binding protein PstB;                                                                        |
| P | Q3ATA4 | DE | Phosphate-transporting ATPase;                                                                                    |
| P | Q3ATA4 | DR | inorganic phosphate transmembrane transporter activity                                                            |
| P | Q3ATA4 | DR | phosphate transmembrane-transporting ATPase activity                                                              |
| P | Q3ATY5 | DE | Lipoprotein-releasing system ATP-binding protein LolD 1;                                                          |
| P | Q3ATY5 | DR | lipoprotein transporter activity                                                                                  |
| P | Q3AXX4 | CC | Part of the ABC transporter complex PstSACB involved in phosphate import                                          |
| P | Q3AXX4 | DE | ABC phosphate transporter;                                                                                        |
| P | Q3AXX4 | DE | Phosphate import ATP-binding protein PstB;                                                                        |
| P | Q3AXX4 | DE | Phosphate-transporting ATPase;                                                                                    |
| P | Q3AXX4 | DR | inorganic phosphate transmembrane transporter activity                                                            |
| P | Q3AXX4 | DR | phosphate transmembrane-transporting ATPase activity                                                              |
| P | Q3B1C1 | CC | Transport of potassium into the cell (By similarity).                                                             |
| P | Q3B1C1 | DE | Probable potassium transport system protein kup;                                                                  |
| P | Q3B1C1 | DR | potassium ion transmembrane transporter activity                                                                  |
| P | Q3B276 | DE | Lipoprotein-releasing system ATP-binding protein LolD 2;                                                          |
| P | Q3B276 | DR | lipoprotein transporter activity                                                                                  |
| P | Q3B2U2 | DE | Lipoprotein-releasing system ATP-binding protein LolD 1;                                                          |
| P | Q3B2U2 | DR | lipoprotein transporter activity                                                                                  |
| P | Q3B3H7 | CC | Part of the ABC transporter complex PstSACB involved in phosphate import                                          |
| P | Q3B3H7 | DE | ABC phosphate transporter;                                                                                        |
| P | Q3B3H7 | DE | Phosphate import ATP-binding protein PstB;                                                                        |
| P | Q3B3H7 | DE | Phosphate-transporting ATPase;                                                                                    |
| P | Q3B3H7 | DR | inorganic phosphate transmembrane transporter activity                                                            |
| P | Q3B3H7 | DR | phosphate transmembrane-transporting ATPase activity                                                              |
| P | Q3ICT8 | CC | Part of the ABC transporter complex HmuTUV involved in hemin import                                               |
| P | Q3ICT8 | DE | Hemin import ATP-binding protein HmuV;                                                                            |
| P | Q3IL62 | DE | Lipoprotein-releasing system ATP-binding protein LolD;                                                            |
| P | Q3IL62 | DR | lipoprotein transporter activity                                                                                  |
| P | Q3ILC5 | CC | Part of the ABC transporter complex PstSACB involved in phosphate import                                          |
| P | Q3ILC5 | DE | ABC phosphate transporter;                                                                                        |
| P | Q3ILC5 | DE | Phosphate import ATP-binding protein PstB;                                                                        |

|   |        |    |                                                                                                                                                                                         |
|---|--------|----|-----------------------------------------------------------------------------------------------------------------------------------------------------------------------------------------|
| P | Q3ILC5 | DE | Phosphate-transporting ATPase;                                                                                                                                                          |
| P | Q3ILC5 | DR | inorganic phosphate transmembrane transporter activity                                                                                                                                  |
| P | Q3ILC5 | DR | phosphate transmembrane-transporting ATPase activity                                                                                                                                    |
| P | Q3IM24 | DR | phosphonate transmembrane-transporting ATPase activity                                                                                                                                  |
| P | Q3IM36 | CC | Part of the ABC transporter complex PstSACB involved in phosphate import                                                                                                                |
| P | Q3IM36 | DE | ABC phosphate transporter 3;                                                                                                                                                            |
| P | Q3IM36 | DE | Phosphate import ATP-binding protein PstB 3;                                                                                                                                            |
| P | Q3IM36 | DE | Phosphate-transporting ATPase 3;                                                                                                                                                        |
| P | Q3IM36 | DR | inorganic phosphate transmembrane transporter activity                                                                                                                                  |
| P | Q3IM36 | DR | phosphate transmembrane-transporting ATPase activity                                                                                                                                    |
| P | Q3IS07 | CC | Part of the ABC transporter complex PstSACB involved in phosphate import                                                                                                                |
| P | Q3IS07 | DE | ABC phosphate transporter 1;                                                                                                                                                            |
| P | Q3IS07 | DE | Phosphate import ATP-binding protein PstB 1;                                                                                                                                            |
| P | Q3IS07 | DE | Phosphate-transporting ATPase 1;                                                                                                                                                        |
| P | Q3IS07 | DR | inorganic phosphate transmembrane transporter activity                                                                                                                                  |
| P | Q3IS07 | DR | phosphate transmembrane-transporting ATPase activity                                                                                                                                    |
| P | Q3ISC1 | DR | phosphonate transmembrane-transporting ATPase activity                                                                                                                                  |
| P | Q3J7S3 | DE | Lipoprotein-releasing system ATP-binding protein LolD;                                                                                                                                  |
| P | Q3J7S3 | DR | lipoprotein transporter activity                                                                                                                                                        |
| P | Q3J8J2 | CC | Part of the ABC transporter complex PstSACB involved in phosphate import                                                                                                                |
| P | Q3J8J2 | DE | ABC phosphate transporter 2;                                                                                                                                                            |
| P | Q3J8J2 | DE | Phosphate import ATP-binding protein PstB 2;                                                                                                                                            |
| P | Q3J8J2 | DE | Phosphate-transporting ATPase 2;                                                                                                                                                        |
| P | Q3J8J2 | DR | inorganic phosphate transmembrane transporter activity                                                                                                                                  |
| P | Q3J8J2 | DR | phosphate transmembrane-transporting ATPase activity                                                                                                                                    |
| P | Q3JCI7 | CC | Part of the ABC transporter complex CcmAB involved in the biogenesis of c-type cytochromes; once thought to export heme, this seems not to be the case, but its exact role is uncertain |
| P | Q3JCI7 | DE | Heme exporter protein A;                                                                                                                                                                |
| P | Q3JCI7 | DR | heme-transporting ATPase activity                                                                                                                                                       |
| P | Q3JDJ6 | CC | Part of the ABC transporter complex PstSACB involved in phosphate import                                                                                                                |
| P | Q3JDJ6 | DE | ABC phosphate transporter 1;                                                                                                                                                            |
| P | Q3JDJ6 | DE | Phosphate import ATP-binding protein PstB 1;                                                                                                                                            |
| P | Q3JDJ6 | DE | Phosphate-transporting ATPase 1;                                                                                                                                                        |
| P | Q3JDJ6 | DR | phosphate transmembrane-transporting ATPase activity                                                                                                                                    |
| P | Q3KNS8 | DE | Potassium voltage-gated channel, Shaw-related subfamily, member 1;                                                                                                                      |
| P | Q3KNS8 | DR | voltage-gated potassium channel activity                                                                                                                                                |
| P | Q3KNW5 | CC | Transports sulfoconjugated steroid hormones, as well as tauroolithocholic acid-3-sulfate and sulfoconjugated pyrenes in a sodium-dependent manner.                                      |
| P | Q3KNW5 | DE | Sodium-dependent organic anion transporter;                                                                                                                                             |
| P | Q3KNW5 | DR | bile acid:sodium symporter activity                                                                                                                                                     |
| P | Q3KNW5 | DR | bile acid:sodium symporter activity                                                                                                                                                     |
| P | Q3KR50 | DR | calcium channel activity                                                                                                                                                                |
| P | Q3LS21 | CC | pH-dependent, voltage-insensitive, background potassium channel protein (by similarity)                                                                                                 |
| P | Q3LS21 | DE | Acid-sensitive potassium channel protein TASK-3;                                                                                                                                        |
| P | Q3LS21 | DE | Potassium channel subfamily K member 9;                                                                                                                                                 |
| P | Q3LS21 | DE | TWIK-related acid-sensitive K+ channel 3;                                                                                                                                               |
| P | Q3LS21 | DR | potassium channel activity                                                                                                                                                              |
| P | Q3MNJ6 | DR | copper-exporting ATPase activity                                                                                                                                                        |
| P | Q3SNN8 | CC | Na+/H+ antiporter that extrudes sodium in exchange for external protons (by similarity)                                                                                                 |
| P | Q3SNN8 | DE | Na+/H+ antiporter nhaA;                                                                                                                                                                 |
| P | Q3SNN8 | DE | Sodium/proton antiporter nhaA;                                                                                                                                                          |
| P | Q3SQ65 | CC | Part of the ABC transporter complex HmuTUV involved in hemin import                                                                                                                     |
| P | Q3SQ65 | DE | Hemin import ATP-binding protein HmuV;                                                                                                                                                  |
| P | Q3SRG8 | DE | Lipoprotein-releasing system ATP-binding protein LolD;                                                                                                                                  |
| P | Q3SRG8 | DR | lipoprotein transporter activity                                                                                                                                                        |
| P | Q3ST91 | CC | Transport of potassium into the cell (By similarity).                                                                                                                                   |
| P | Q3ST91 | DE | Probable potassium transport system protein kup;                                                                                                                                        |
| P | Q3ST91 | DR | potassium ion transmembrane transporter activity                                                                                                                                        |
| P | Q3SVB5 | CC | Part of the ABC transporter complex PstSACB involved in phosphate import                                                                                                                |
| P | Q3SVB5 | DE | ABC phosphate transporter;                                                                                                                                                              |
| P | Q3SVB5 | DE | Phosphate import ATP-binding protein PstB;                                                                                                                                              |
| P | Q3SVB5 | DE | Phosphate-transporting ATPase;                                                                                                                                                          |
| P | Q3SVB5 | DR | inorganic phosphate transmembrane transporter activity                                                                                                                                  |
| P | Q3SVB5 | DR | phosphate transmembrane-transporting ATPase activity                                                                                                                                    |

|   |        |    |                                                                                                                                                                                         |
|---|--------|----|-----------------------------------------------------------------------------------------------------------------------------------------------------------------------------------------|
| P | Q3SVV2 | CC | Part of the ABC transporter complex CcmAB involved in the biogenesis of c-type cytochromes; once thought to export heme, this seems not to be the case, but its exact role is uncertain |
| P | Q3SVV2 | DE | Heme exporter protein A;                                                                                                                                                                |
| P | Q3SVV2 | DR | heme-transporting ATPase activity                                                                                                                                                       |
| P | Q3SWS6 | DR | calcium channel activity                                                                                                                                                                |
| P | Q3TXX4 | CC | Mediates the uptake of glutamate into synaptic vesicles at presynaptic nerve terminals of excitatory neural cells                                                                       |
| P | Q3TXX4 | DE | Vesicular glutamate transporter 1;                                                                                                                                                      |
| P | Q3U9N9 | DE | Aromatic amino acid transporter 1;                                                                                                                                                      |
| P | Q3UEZ8 | DE | Na <sup>+</sup> /bile acid cotransporter 4;                                                                                                                                             |
| P | Q3UEZ8 | DE | Na <sup>+</sup> /bile acid cotransporter 4;                                                                                                                                             |
| P | Q3UEZ8 | DE | Sodium/bile acid cotransporter 4;                                                                                                                                                       |
| P | Q3UEZ8 | DE | Sodium/bile acid cotransporter 4;                                                                                                                                                       |
| P | Q3UEZ8 | DR | bile acid:sodium symporter activity                                                                                                                                                     |
| P | Q3UEZ8 | DR | bile acid:sodium symporter activity                                                                                                                                                     |
| P | Q3UHK1 | DE | Proton myo-inositol cotransporter;                                                                                                                                                      |
| P | Q3UVU3 | CC | May be involved in zinc transport out of the cell, being a zinc-efflux transporter (By similarity).                                                                                     |
| P | Q3UVU3 | DE | Zinc transporter 10;                                                                                                                                                                    |
| P | Q3V132 | CC | Catalyzes the exchange of ADP and ATP across the mitochondrial inner membrane                                                                                                           |
| P | Q3V132 | CC | Catalyzes the exchange of ADP and ATP across the mitochondrial inner membrane                                                                                                           |
| P | Q3V132 | DE | ADP,ATP carrier protein 4;                                                                                                                                                              |
| P | Q3V132 | DE | ADP/ATP translocase 4;                                                                                                                                                                  |
| P | Q3V132 | DE | ADP/ATP translocase 4;                                                                                                                                                                  |
| P | Q3YL57 | DE | Na <sup>+</sup> /H <sup>+</sup> exchanger 8;                                                                                                                                            |
| P | Q3YL57 | DE | Sodium/hydrogen exchanger 8;                                                                                                                                                            |
| P | Q3YSK9 | CC | Part of the ABC transporter complex ZnuABC involved in zinc import                                                                                                                      |
| P | Q3YSK9 | DE | Zinc import ATP-binding protein ZnuC;                                                                                                                                                   |
| P | Q3YSK9 | DR | zinc transporting ATPase activity                                                                                                                                                       |
| P | Q3ZA58 | CC | Part of the ABC transporter complex PstSACB involved in phosphate import                                                                                                                |
| P | Q3ZA58 | DE | ABC phosphate transporter;                                                                                                                                                              |
| P | Q3ZA58 | DE | Phosphate import ATP-binding protein PstB;                                                                                                                                              |
| P | Q3ZA58 | DE | Phosphate-transporting ATPase;                                                                                                                                                          |
| P | Q3ZA58 | DR | inorganic phosphate transmembrane transporter activity                                                                                                                                  |
| P | Q3ZA58 | DR | phosphate transmembrane-transporting ATPase activity                                                                                                                                    |
| P | Q3ZCW7 | DE | Sodium/hydrogen exchanger;                                                                                                                                                              |
| P | Q3ZCW7 | DR | sodium:hydrogen antiporter activity                                                                                                                                                     |
| P | Q3ZWN4 | CC | Part of the ABC transporter complex PstSACB involved in phosphate import                                                                                                                |
| P | Q3ZWN4 | DE | ABC phosphate transporter;                                                                                                                                                              |
| P | Q3ZWN4 | DE | Phosphate import ATP-binding protein PstB;                                                                                                                                              |
| P | Q3ZWN4 | DE | Phosphate-transporting ATPase;                                                                                                                                                          |
| P | Q3ZWN4 | DR | inorganic phosphate transmembrane transporter activity                                                                                                                                  |
| P | Q3ZWN4 | DR | phosphate transmembrane-transporting ATPase activity                                                                                                                                    |
| P | Q40746 | CC | Aquaporins facilitate the transport of water and small neutral solutes across cell membranes (By similarity).                                                                           |
| P | Q41951 | CC | Aquaporin required to facilitate the transport of water from the vacuolar compartment to the cytoplasm                                                                                  |
| P | Q41951 | DR | water channel activity                                                                                                                                                                  |
| P | Q41963 | CC | Water channel required to facilitate the transport of water across cell membrane                                                                                                        |
| P | Q41975 | CC | Aquaporins facilitate the transport of water and small neutral solutes across cell membranes (By similarity).                                                                           |
| P | Q43650 | DE | Inorganic phosphate transporter 1;                                                                                                                                                      |
| P | Q43650 | DR | inorganic phosphate transmembrane transporter activity                                                                                                                                  |
| P | Q43975 | DE | 4-hydroxybenzoate transporter;                                                                                                                                                          |
| P | Q44292 | CC | Essential component of the nitrate-transporting system                                                                                                                                  |
| P | Q44292 | DE | Nitrate transport protein NrtA;                                                                                                                                                         |
| P | Q44613 | DE | Lipoprotein-releasing system ATP-binding protein LolD;                                                                                                                                  |
| P | Q44613 | DR | lipoprotein transporter activity                                                                                                                                                        |
| P | Q44840 | CC | This system is involved in glucose transport (By similarity).                                                                                                                           |
| P | Q44840 | DE | Glucose-specific phosphotransferase enzyme IIA component;                                                                                                                               |
| P | Q44840 | DE | PTS system glucose-specific EIIA component;                                                                                                                                             |
| P | Q45153 | DE | Quaternary amine transporter;                                                                                                                                                           |
| P | Q45247 | CC | Involved in nickel incorporation/metabolism into the hydrogenase apoprotein.                                                                                                            |
| P | Q45247 | DE | Hydrogenase nickel incorporation protein hupN;                                                                                                                                          |

|   |        |    |                                                                                                                                                                                                            |
|---|--------|----|------------------------------------------------------------------------------------------------------------------------------------------------------------------------------------------------------------|
| P | Q45247 | DR | nickel ion transmembrane transporter activity                                                                                                                                                              |
| P | Q45460 | CC | Involved in a high affinity multicomponent binding- protein-dependent transport system for choline                                                                                                         |
| P | Q45460 | DE | Choline transport ATP-binding protein OpuBA;                                                                                                                                                               |
| P | Q45461 | CC | Involved in a high affinity multicomponent binding- protein-dependent transport system for choline; probably responsible for the translocation of the substrate across the membrane.                       |
| P | Q45461 | DE | Choline transport system permease protein opuBB;                                                                                                                                                           |
| P | Q45462 | CC | Member of a high affinity multicomponent binding- protein-dependent transport system for choline.                                                                                                          |
| P | Q45462 | DE | Choline-binding protein;                                                                                                                                                                                   |
| P | Q46170 | CC | Catalyzes an electroneutral exchange between arginine and ornithine to allow high-efficiency energy conversion in the arginine deiminase pathway (By similarity)                                           |
| P | Q46170 | CC | Catalyzes an electroneutral exchange between arginine and ornithine to allow high-efficiency energy conversion in the arginine deiminase pathway (By similarity)                                           |
| P | Q46170 | DE | Arginine/ornithine antiporter;                                                                                                                                                                             |
| P | Q46170 | DE | Arginine/ornithine antiporter;                                                                                                                                                                             |
| P | Q46M63 | DE | 2,4-D transport protein;                                                                                                                                                                                   |
| P | Q47537 | CC | Part of a binding-protein-dependent transport system for taurine.                                                                                                                                          |
| P | Q47537 | DE | Taurine-binding periplasmic protein;                                                                                                                                                                       |
| P | Q47538 | CC | Part of the ABC transporter complex TauABC involved in taurine import                                                                                                                                      |
| P | Q47538 | DE | Taurine import ATP-binding protein TauB;                                                                                                                                                                   |
| P | Q47538 | DR | taurine-transporting ATPase activity                                                                                                                                                                       |
| P | Q47539 | CC | Part of a binding-protein-dependent transport system for taurine                                                                                                                                           |
| P | Q47539 | DE | Taurine transport system permease protein tauC;                                                                                                                                                            |
| P | Q478L3 | CC | Part of the ABC transporter complex CcmAB involved in the biogenesis of c-type cytochromes; once thought to export heme, this seems not to be the case, but its exact role is uncertain                    |
| P | Q478L3 | DE | Heme exporter protein A;                                                                                                                                                                                   |
| P | Q478L3 | DR | heme-transporting ATPase activity                                                                                                                                                                          |
| P | Q47A37 | CC | Part of the ABC transporter complex PstSACB involved in phosphate import                                                                                                                                   |
| P | Q47A37 | DE | ABC phosphate transporter;                                                                                                                                                                                 |
| P | Q47A37 | DE | Phosphate import ATP-binding protein PstB;                                                                                                                                                                 |
| P | Q47A37 | DE | Phosphate-transporting ATPase;                                                                                                                                                                             |
| P | Q47A37 | DR | inorganic phosphate transmembrane transporter activity                                                                                                                                                     |
| P | Q47A37 | DR | phosphate transmembrane-transporting ATPase activity                                                                                                                                                       |
| P | Q47A46 | CC | Transport of potassium into the cell (By similarity).                                                                                                                                                      |
| P | Q47A46 | DE | Probable potassium transport system protein kup 3;                                                                                                                                                         |
| P | Q47A46 | DR | potassium ion transmembrane transporter activity                                                                                                                                                           |
| P | Q47BQ7 | DR | sodium:dicarboxylate symporter activity                                                                                                                                                                    |
| P | Q47C66 | DE | Lipoprotein-releasing system ATP-binding protein LolD;                                                                                                                                                     |
| P | Q47C66 | DR | lipoprotein transporter activity                                                                                                                                                                           |
| P | Q47CB7 | DR | molybdate transmembrane-transporting ATPase activity                                                                                                                                                       |
| P | Q47F10 | DR | phosphonate transmembrane-transporting ATPase activity                                                                                                                                                     |
| P | Q47GU1 | CC | Transport of potassium into the cell (By similarity).                                                                                                                                                      |
| P | Q47GU1 | DE | Probable potassium transport system protein kup 2;                                                                                                                                                         |
| P | Q47GU1 | DR | potassium ion transmembrane transporter activity                                                                                                                                                           |
| P | Q47H38 | CC | One of the components of the high-affinity ATP-driven potassium transport (or KDP) system, which catalyzes the hydrolysis of ATP coupled with the exchange of hydrogen and potassium ions (By similarity). |
| P | Q47H38 | DE | Potassium-binding and translocating subunit A;                                                                                                                                                             |
| P | Q47H38 | DE | Potassium-translocating ATPase A chain;                                                                                                                                                                    |
| P | Q47H38 | DE | Potassium-transporting ATPase A chain;                                                                                                                                                                     |
| P | Q47H38 | DR | potassium-transporting ATPase activity                                                                                                                                                                     |
| P | Q47H39 | CC | One of the components of the high-affinity ATP-driven potassium transport (or KDP) system, which catalyzes the hydrolysis of ATP coupled with the exchange of hydrogen and potassium ions (By similarity). |
| P | Q47H39 | DE | Potassium-binding and translocating subunit B;                                                                                                                                                             |
| P | Q47H39 | DE | Potassium-translocating ATPase B chain;                                                                                                                                                                    |
| P | Q47H39 | DE | Potassium-transporting ATPase B chain;                                                                                                                                                                     |
| P | Q47H39 | DR | potassium-transporting ATPase activity                                                                                                                                                                     |
| P | Q47H40 | CC | One of the components of the high-affinity ATP-driven potassium transport (or KDP) system, which catalyzes the hydrolysis of ATP coupled with the exchange of hydrogen and potassium ions                  |
| P | Q47H40 | DE | Potassium-binding and translocating subunit C;                                                                                                                                                             |

|   |        |    |                                                                                                                                                                                         |
|---|--------|----|-----------------------------------------------------------------------------------------------------------------------------------------------------------------------------------------|
| P | Q47H40 | DE | Potassium-translocating ATPase C chain;                                                                                                                                                 |
| P | Q47H40 | DE | Potassium-transporting ATPase C chain;                                                                                                                                                  |
| P | Q47H40 | DR | potassium-transporting ATPase activity                                                                                                                                                  |
| P | Q47I87 | CC | Na <sup>+</sup> /H <sup>+</sup> antiporter that extrudes sodium in exchange for external protons (By similarity)                                                                        |
| P | Q47I87 | DE | Na <sup>+</sup> /H <sup>+</sup> antiporter nhaA;                                                                                                                                        |
| P | Q47I87 | DE | Sodium/proton antiporter nhaA;                                                                                                                                                          |
| P | Q47IT9 | CC | Transport of potassium into the cell (By similarity).                                                                                                                                   |
| P | Q47IT9 | DE | Probable potassium transport system protein kup 1;                                                                                                                                      |
| P | Q47IT9 | DR | potassium ion transmembrane transporter activity                                                                                                                                        |
| P | Q47Y12 | CC | Part of the ABC transporter complex PstSACB involved in phosphate import                                                                                                                |
| P | Q47Y12 | DE | ABC phosphate transporter;                                                                                                                                                              |
| P | Q47Y12 | DE | Phosphate import ATP-binding protein PstB;                                                                                                                                              |
| P | Q47Y12 | DE | Phosphate-transporting ATPase;                                                                                                                                                          |
| P | Q47Y12 | DR | inorganic phosphate transmembrane transporter activity                                                                                                                                  |
| P | Q47Y12 | DR | phosphate transmembrane-transporting ATPase activity                                                                                                                                    |
| P | Q47YG8 | DE | Lipoprotein-releasing system ATP-binding protein LolD;                                                                                                                                  |
| P | Q47YG8 | DR | lipoprotein transporter activity                                                                                                                                                        |
| P | Q48262 | CC | High-affinity nickel intake protein                                                                                                                                                     |
| P | Q48262 | CC | Imports nickel ions in an energy-dependent fashion                                                                                                                                      |
| P | Q48262 | DE | High-affinity nickel-transport protein nixA;                                                                                                                                            |
| P | Q48262 | DR | nickel ion transmembrane transporter activity                                                                                                                                           |
| P | Q485F0 | CC | Involved in the import of serine and threonine into the cell, with the concomitant import of sodium (symport system) (By similarity).                                                   |
| P | Q485F0 | DE | Na <sup>+</sup> /serine-threonine symporter;                                                                                                                                            |
| P | Q485F0 | DR | sodium:dicarboxylate symporter activity                                                                                                                                                 |
| P | Q485F0 | DR | sodium:dicarboxylate symporter activity                                                                                                                                                 |
| P | Q48769 | DE | Citrate permease;                                                                                                                                                                       |
| P | Q487I2 | CC | Part of the ABC transporter complex CcmAB involved in the biogenesis of c-type cytochromes; once thought to export heme, this seems not to be the case, but its exact role is uncertain |
| P | Q487I2 | DE | Heme exporter protein A;                                                                                                                                                                |
| P | Q487I2 | DR | heme-transporting ATPase activity                                                                                                                                                       |
| P | Q48WG5 | DE | PTS system, glucose-specific IIABC component;                                                                                                                                           |
| P | Q491Z9 | CC | Mediates influx of magnesium ions (By similarity).                                                                                                                                      |
| P | Q491Z9 | DE | Magnesium transport protein CorA;                                                                                                                                                       |
| P | Q491Z9 | DR | cobalt ion transmembrane transporter activity                                                                                                                                           |
| P | Q491Z9 | DR | magnesium ion transmembrane transporter activity                                                                                                                                        |
| P | Q492G8 | CC | H <sup>+</sup> -stimulated, highly selective, manganese uptake system (By similarity).                                                                                                  |
| P | Q492G8 | DE | Probable manganese transport protein mntH;                                                                                                                                              |
| P | Q492R2 | DE | Lipoprotein-releasing system ATP-binding protein LolD;                                                                                                                                  |
| P | Q492R2 | DR | lipoprotein transporter activity                                                                                                                                                        |
| P | Q494P0 | CC | High-affinity transporter for external inorganic phosphate (By similarity).                                                                                                             |
| P | Q494P0 | DE | Probable inorganic phosphate transporter 1-7;                                                                                                                                           |
| P | Q494P0 | DR | inorganic phosphate transmembrane transporter activity                                                                                                                                  |
| P | Q49B93 | CC | Acts as an electroneutral and low-affinity sodium (Na <sup>+</sup> )-dependent sodium-coupled solute transporter                                                                        |
| P | Q49B93 | CC | mediates electroneutral uptake of lactate, with a stoichiometry of 2 Na <sup>+</sup> for each lactate                                                                                   |
| P | Q49B93 | DE | Electroneutral sodium monocarboxylate cotransporter;                                                                                                                                    |
| P | Q49B93 | DE | Low-affinity sodium-lactate cotransporter;                                                                                                                                              |
| P | Q49B93 | DE | Sodium-coupled monocarboxylate transporter 2;                                                                                                                                           |
| P | Q4F7G0 | CC | Sugar transporter (Potential).                                                                                                                                                          |
| P | Q4F7G0 | DE | Sugar transporter ERD6-like 2;                                                                                                                                                          |
| P | Q4F7G0 | DE | Sugar transporter-like protein 3;                                                                                                                                                       |
| P | Q4FLF6 | CC | Part of the ABC transporter complex PstSACB involved in phosphate import                                                                                                                |
| P | Q4FLF6 | DE | ABC phosphate transporter;                                                                                                                                                              |
| P | Q4FLF6 | DE | Phosphate import ATP-binding protein PstB;                                                                                                                                              |
| P | Q4FLF6 | DE | Phosphate-transporting ATPase;                                                                                                                                                          |
| P | Q4FLF6 | DR | inorganic phosphate transmembrane transporter activity                                                                                                                                  |
| P | Q4FLF6 | DR | phosphate transmembrane-transporting ATPase activity                                                                                                                                    |
| P | Q4FLX6 | CC | Na <sup>+</sup> /H <sup>+</sup> antiporter that extrudes sodium in exchange for external protons (By similarity)                                                                        |
| P | Q4FLX6 | DE | Na <sup>+</sup> /H <sup>+</sup> antiporter nhaA;                                                                                                                                        |
| P | Q4FLX6 | DE | Sodium/proton antiporter nhaA;                                                                                                                                                          |
| P | Q4FMG5 | CC | Part of the ABC transporter complex TauABC involved in taurine import                                                                                                                   |
| P | Q4FMG5 | DE | Taurine import ATP-binding protein TauB;                                                                                                                                                |
| P | Q4FMG5 | DR | taurine-transporting ATPase activity                                                                                                                                                    |

|   |        |    |                                                                                                                                                                                         |
|---|--------|----|-----------------------------------------------------------------------------------------------------------------------------------------------------------------------------------------|
| P | Q4G0N8 | CC | Sperm-specific sodium/hydrogen exchanger involved in intracellular pH regulation of spermatozoa                                                                                         |
| P | Q4G0N8 | DE | Na <sup>+</sup> /H <sup>+</sup> exchanger 10;                                                                                                                                           |
| P | Q4G0N8 | DE | Sodium/hydrogen exchanger 10;                                                                                                                                                           |
| P | Q4G0N8 | DE | Sperm-specific Na <sup>+</sup> /H <sup>+</sup> exchanger;                                                                                                                               |
| P | Q4K3K9 | CC | Part of the ABC transporter complex PstSACB involved in phosphate import                                                                                                                |
| P | Q4K3K9 | DE | ABC phosphate transporter;                                                                                                                                                              |
| P | Q4K3K9 | DE | Phosphate import ATP-binding protein PstB;                                                                                                                                              |
| P | Q4K3K9 | DE | Phosphate-transporting ATPase;                                                                                                                                                          |
| P | Q4K3K9 | DR | inorganic phosphate transmembrane transporter activity                                                                                                                                  |
| P | Q4K3K9 | DR | phosphate transmembrane-transporting ATPase activity                                                                                                                                    |
| P | Q4K5Z7 | CC | Part of the ABC transporter complex HmuTUV involved in hemin import                                                                                                                     |
| P | Q4K5Z7 | DE | Hemin import ATP-binding protein HmuV;                                                                                                                                                  |
| P | Q4K681 | CC | Part of the ABC transporter complex PotABCD involved in spermidine/putrescine import                                                                                                    |
| P | Q4K681 | CC | Part of the ABC transporter complex PotABCD involved in spermidine/putrescine import                                                                                                    |
| P | Q4K681 | DE | Spermidine/putrescine import ATP-binding protein PotA;                                                                                                                                  |
| P | Q4K681 | DE | Spermidine/putrescine import ATP-binding protein PotA;                                                                                                                                  |
| P | Q4K9I6 | CC | Involved in the import of serine and threonine into the cell, with the concomitant import of sodium (symport system) (By similarity).                                                   |
| P | Q4K9I6 | DE | Na <sup>+</sup> /serine-threonine symporter;                                                                                                                                            |
| P | Q4K9I6 | DR | sodium:dicarboxylate symporter activity                                                                                                                                                 |
| P | Q4K9I6 | DR | sodium:dicarboxylate symporter activity                                                                                                                                                 |
| P | Q4KB64 | CC | Part of the ABC transporter complex ModABC involved in molybdenum import                                                                                                                |
| P | Q4KB64 | DE | Molybdenum import ATP-binding protein ModC;                                                                                                                                             |
| P | Q4KB64 | DR | molybdenum ion transmembrane transporter activity                                                                                                                                       |
| P | Q4KBU0 | CC | Part of the ABC transporter complex MetNIQ involved in methionine import                                                                                                                |
| P | Q4KBU0 | DE | Methionine import ATP-binding protein MetN 3;                                                                                                                                           |
| P | Q4KBY6 | CC | Na <sup>+</sup> /H <sup>+</sup> antiporter that extrudes sodium in exchange for external protons (By similarity).                                                                       |
| P | Q4KBY6 | DE | Na <sup>+</sup> /H <sup>+</sup> antiporter nhaB;                                                                                                                                        |
| P | Q4KBY6 | DE | Sodium/proton antiporter nhaB;                                                                                                                                                          |
| P | Q4KBY6 | DR | sodium:hydrogen antiporter activity                                                                                                                                                     |
| P | Q4KFA2 | DE | Lipoprotein-releasing system ATP-binding protein LolD;                                                                                                                                  |
| P | Q4KFA2 | DR | lipoprotein transporter activity                                                                                                                                                        |
| P | Q4KG27 | CC | Part of the ABC transporter complex CcmAB involved in the biogenesis of c-type cytochromes; once thought to export heme, this seems not to be the case, but its exact role is uncertain |
| P | Q4KG27 | DE | Heme exporter protein A;                                                                                                                                                                |
| P | Q4KG27 | DR | heme-transporting ATPase activity                                                                                                                                                       |
| P | Q4KH68 | CC | Na <sup>+</sup> /H <sup>+</sup> antiporter that extrudes sodium in exchange for external protons (By similarity).                                                                       |
| P | Q4KH68 | DE | Na <sup>+</sup> /H <sup>+</sup> antiporter nhaA;                                                                                                                                        |
| P | Q4KH68 | DE | Sodium/proton antiporter nhaA;                                                                                                                                                          |
| P | Q4KHA4 | CC | Transport of potassium into the cell (By similarity).                                                                                                                                   |
| P | Q4KHA4 | DE | Probable potassium transport system protein kup;                                                                                                                                        |
| P | Q4KHA4 | DR | potassium ion transmembrane transporter activity                                                                                                                                        |
| P | Q4KK16 | CC | Part of the ABC transporter complex TauABC involved in taurine import                                                                                                                   |
| P | Q4KK16 | DE | Taurine import ATP-binding protein TauB;                                                                                                                                                |
| P | Q4KK16 | DR | taurine-transporting ATPase activity                                                                                                                                                    |
| P | Q4KK46 | CC | Part of the ABC transporter complex MetNIQ involved in methionine import                                                                                                                |
| P | Q4KK46 | DE | Methionine import ATP-binding protein MetN 2;                                                                                                                                           |
| P | Q4KKK4 | CC | Part of the ABC transporter complex ZnuABC involved in zinc import                                                                                                                      |
| P | Q4KKK4 | DE | Zinc import ATP-binding protein ZnuC;                                                                                                                                                   |
| P | Q4KKK4 | DR | zinc transporting ATPase activity                                                                                                                                                       |
| P | Q4KKK8 | CC | Part of the ABC transporter complex MetNIQ involved in methionine import                                                                                                                |
| P | Q4KKK8 | DE | Methionine import ATP-binding protein MetN 1;                                                                                                                                           |
| P | Q4LE63 | DR | calcium-transporting ATPase activity                                                                                                                                                    |
| P | Q4VAM4 | DR | neurotransmitter:sodium symporter activity                                                                                                                                              |
| P | Q4ZFY1 | DE | cDNA, FLJ95252, Homo sapiens potassium voltage-gated channel, delayed-rectifier, subfamily S, member 3 (KCNS3), mRNA;                                                                   |
| P | Q4ZFY1 | DR | voltage-gated potassium channel activity                                                                                                                                                |
| P | Q4ZJI4 | DE | Na <sup>+</sup> /H <sup>+</sup> exchanger-like domain-containing protein 1;                                                                                                             |
| P | Q4ZJI4 | DE | Sodium/hydrogen exchanger-like domain-containing protein 1;                                                                                                                             |
| P | Q50046 | CC | Part of the ABC transporter complex PstSACB involved in phosphate import                                                                                                                |
| P | Q50046 | DE | ABC phosphate transporter;                                                                                                                                                              |
| P | Q50046 | DE | Phosphate import ATP-binding protein PstB;                                                                                                                                              |
| P | Q50046 | DE | Phosphate-transporting ATPase;                                                                                                                                                          |



|   |        |    |                                                                                                                                                                                                                                                                            |
|---|--------|----|----------------------------------------------------------------------------------------------------------------------------------------------------------------------------------------------------------------------------------------------------------------------------|
| P | Q50046 | DR | inorganic phosphate transmembrane transporter activity                                                                                                                                                                                                                     |
| P | Q50046 | DR | phosphate transmembrane-transporting ATPase activity                                                                                                                                                                                                                       |
| P | Q50097 | CC | Part of a binding-protein-dependent transport system for phosphate; probably responsible for the translocation of the substrate across the membrane (By similarity)                                                                                                        |
| P | Q50097 | DE | Phosphate transport system permease protein pstA;                                                                                                                                                                                                                          |
| P | Q50097 | DR | inorganic phosphate transmembrane transporter activity                                                                                                                                                                                                                     |
| P | Q50098 | CC | Part of a binding-protein-dependent transport system for phosphate; probably responsible for the translocation of the substrate across the membrane (By similarity)                                                                                                        |
| P | Q50098 | DE | Phosphate transport system permease protein pstC;                                                                                                                                                                                                                          |
| P | Q50098 | DR | inorganic phosphate transmembrane transporter activity                                                                                                                                                                                                                     |
| P | Q50103 | CC | H <sup>+</sup> -stimulated, highly selective, manganese uptake system (By similarity).                                                                                                                                                                                     |
| P | Q50103 | DE | Probable manganese transport protein mntH;                                                                                                                                                                                                                                 |
| P | Q50173 | CC | Low-affinity inorganic phosphate transport (By similarity).                                                                                                                                                                                                                |
| P | Q50173 | DE | Probable low-affinity inorganic phosphate transporter;                                                                                                                                                                                                                     |
| P | Q50173 | DR | inorganic phosphate transmembrane transporter activity                                                                                                                                                                                                                     |
| P | Q50773 | CC | This is an energy-conserving, sodium-ion translocating step.                                                                                                                                                                                                               |
| P | Q50774 | CC | This is an energy-conserving, sodium-ion translocating step.                                                                                                                                                                                                               |
| P | Q51104 | DE | Hemoglobin receptor;                                                                                                                                                                                                                                                       |
| P | Q51330 | CC | Anion transporter that carries out the exchange of divalent oxalate with monovalent formate, the product of oxalate decarboxylation, at the plasma membrane, and in doing so catalyzes the vectorial portion of a proton-motive metabolic cycle that drives ATP synthesis. |
| P | Q51330 | CC | Anion transporter that carries out the exchange of divalent oxalate with monovalent formate, the product of oxalate decarboxylation, at the plasma membrane, and in doing so catalyzes the vectorial portion of a proton-motive metabolic cycle that drives ATP synthesis. |
| P | Q51330 | DE | Oxalate:formate antiport protein;                                                                                                                                                                                                                                          |
| P | Q51330 | DE | Oxalate:formate antiport protein;                                                                                                                                                                                                                                          |
| P | Q51330 | DE | Oxalate:formate antiporter;                                                                                                                                                                                                                                                |
| P | Q51330 | DE | Oxalate:formate antiporter;                                                                                                                                                                                                                                                |
| P | Q51330 | DE | Oxalate:formate exchange protein;                                                                                                                                                                                                                                          |
| P | Q51330 | DE | Oxalate:formate exchange protein;                                                                                                                                                                                                                                          |
| P | Q51389 | CC | Glycerol enters the cell via the glycerol diffusion facilitator protein                                                                                                                                                                                                    |
| P | Q51389 | CC | This membrane protein facilitates the movement of glycerol across the cytoplasmic membrane.                                                                                                                                                                                |
| P | Q51389 | DE | Glycerol diffusion facilitator;                                                                                                                                                                                                                                            |
| P | Q51389 | DE | Glycerol uptake facilitator protein;                                                                                                                                                                                                                                       |
| P | Q51485 | CC | Facilitates glucose diffusion across the outer membrane.                                                                                                                                                                                                                   |
| P | Q51485 | CC | Involved in the transport of glucose, mannitol, fructose and glycerol (sugars able to support the growth of P.aeruginosa)                                                                                                                                                  |
| P | Q51485 | DE | Glucose porin;                                                                                                                                                                                                                                                             |
| P | Q51546 | CC | Part of the ABC transporter complex PstSACB involved in phosphate import                                                                                                                                                                                                   |
| P | Q51546 | DE | ABC phosphate transporter;                                                                                                                                                                                                                                                 |
| P | Q51546 | DE | Phosphate import ATP-binding protein PstB;                                                                                                                                                                                                                                 |
| P | Q51546 | DE | Phosphate-transporting ATPase;                                                                                                                                                                                                                                             |
| P | Q51546 | DR | inorganic phosphate transmembrane transporter activity                                                                                                                                                                                                                     |
| P | Q51546 | DR | phosphate transmembrane-transporting ATPase activity                                                                                                                                                                                                                       |
| P | Q51955 | CC | Transporter for 4-hydroxybenzoate                                                                                                                                                                                                                                          |
| P | Q51955 | DE | 4-hydroxybenzoate transporter;                                                                                                                                                                                                                                             |
| P | Q52000 | DE | Dicarboxylic acid transport protein;                                                                                                                                                                                                                                       |
| P | Q52663 | CC | Part of a binding-protein-dependent transport system for glutamate, glutamine, aspartate and asparagine.                                                                                                                                                                   |
| P | Q52663 | CC | Part of a binding-protein-dependent transport system for glutamate, glutamine, aspartate and asparagine.                                                                                                                                                                   |
| P | Q52663 | CC | Part of a binding-protein-dependent transport system for glutamate, glutamine, aspartate and asparagine.                                                                                                                                                                   |
| P | Q52663 | DE | Glutamate/glutamine/aspartate/asparagine-binding protein BztA;                                                                                                                                                                                                             |
| P | Q52663 | DE | Glutamate/glutamine/aspartate/asparagine-binding protein BztA;                                                                                                                                                                                                             |
| P | Q52663 | DE | Glutamate/glutamine/aspartate/asparagine-binding protein BztA;                                                                                                                                                                                                             |
| P | Q52663 | DE | Glutamate/glutamine/aspartate/asparagine-binding protein BztA;                                                                                                                                                                                                             |
| P | Q52664 | CC | Part of a binding-protein-dependent transport system for glutamate, glutamine, aspartate and asparagine                                                                                                                                                                    |
| P | Q52664 | CC | Part of a binding-protein-dependent transport system for glutamate, glutamine, aspartate and asparagine                                                                                                                                                                    |

|   |        |    |                                                                                                                                                                                                                                                               |
|---|--------|----|---------------------------------------------------------------------------------------------------------------------------------------------------------------------------------------------------------------------------------------------------------------|
| P | Q52664 | CC | Part of a binding-protein-dependent transport system for glutamate, glutamine, aspartate and asparagine                                                                                                                                                       |
| P | Q52664 | DE | Glutamate/glutamine/aspartate/asparagine transport system permease protein                                                                                                                                                                                    |
| P | Q52664 | DE | Glutamate/glutamine/aspartate/asparagine transport system permease protein                                                                                                                                                                                    |
| P | Q52664 | DE | Glutamate/glutamine/aspartate/asparagine transport system permease protein                                                                                                                                                                                    |
| P | Q52664 | DE | Glutamate/glutamine/aspartate/asparagine transport system permease protein                                                                                                                                                                                    |
| P | Q52665 | CC | Part of a binding-protein-dependent transport system for glutamate, glutamine, aspartate and asparagine                                                                                                                                                       |
| P | Q52665 | CC | Part of a binding-protein-dependent transport system for glutamate, glutamine, aspartate and asparagine                                                                                                                                                       |
| P | Q52665 | CC | Part of a binding-protein-dependent transport system for glutamate, glutamine, aspartate and asparagine                                                                                                                                                       |
| P | Q52665 | DE | Glutamate/glutamine/aspartate/asparagine transport system permease protein                                                                                                                                                                                    |
| P | Q52665 | DE | Glutamate/glutamine/aspartate/asparagine transport system permease protein                                                                                                                                                                                    |
| P | Q52665 | DE | Glutamate/glutamine/aspartate/asparagine transport system permease protein                                                                                                                                                                                    |
| P | Q52665 | DE | Glutamate/glutamine/aspartate/asparagine transport system permease protein                                                                                                                                                                                    |
| P | Q52665 | DE | Glutamate/glutamine/aspartate/asparagine transport system permease protein                                                                                                                                                                                    |
| P | Q52666 | CC | Part of a binding-protein-dependent transport system for glutamate, glutamine, aspartate, asparagine                                                                                                                                                          |
| P | Q52666 | CC | Part of a binding-protein-dependent transport system for glutamate, glutamine, aspartate, asparagine                                                                                                                                                          |
| P | Q52666 | CC | Part of a binding-protein-dependent transport system for glutamate, glutamine, aspartate, asparagine                                                                                                                                                          |
| P | Q52666 | DE | Glutamate/glutamine/aspartate/asparagine transport ATP-binding protein BztD;                                                                                                                                                                                  |
| P | Q52666 | DE | Glutamate/glutamine/aspartate/asparagine transport ATP-binding protein BztD;                                                                                                                                                                                  |
| P | Q52666 | DE | Glutamate/glutamine/aspartate/asparagine transport ATP-binding protein BztD;                                                                                                                                                                                  |
| P | Q52666 | DE | Glutamate/glutamine/aspartate/asparagine transport ATP-binding protein BztD; part of a K <sup>+</sup> efflux system which is required for the adaptation of K.menotti to alkaline pH as well as for the infection process during symbiotic nodule development |
| P | Q52978 | CC | alkaline pH as well as for the infection process during symbiotic nodule development                                                                                                                                                                          |
| P | Q52978 | DE | Probable K <sup>+</sup> /H <sup>+</sup> antiporter subunit A/B;                                                                                                                                                                                               |
| P | Q52978 | DE | Probable K <sup>+</sup> /H <sup>+</sup> antiporter subunit A/B;                                                                                                                                                                                               |
| P | Q52978 | DE | pH adaptation potassium efflux system protein A/B; part of a K <sup>+</sup> efflux system which is required for the adaptation of K.menotti to alkaline pH as well as for the infection process during symbiotic nodule development                           |
| P | Q52980 | CC | alkaline pH as well as for the infection process during symbiotic nodule development                                                                                                                                                                          |
| P | Q52980 | DE | Probable K <sup>+</sup> /H <sup>+</sup> antiporter subunit C;                                                                                                                                                                                                 |
| P | Q52980 | DE | Probable K <sup>+</sup> /H <sup>+</sup> antiporter subunit C;                                                                                                                                                                                                 |
| P | Q52980 | DE | pH adaptation potassium efflux system protein C; part of a K <sup>+</sup> efflux system which is required for the adaptation of K.menotti to alkaline pH as well as for the infection process during symbiotic nodule development                             |
| P | Q52981 | CC | alkaline pH as well as for the infection process during symbiotic nodule development                                                                                                                                                                          |
| P | Q52981 | DE | Probable K <sup>+</sup> /H <sup>+</sup> antiporter subunit D;                                                                                                                                                                                                 |
| P | Q52981 | DE | Probable K <sup>+</sup> /H <sup>+</sup> antiporter subunit D;                                                                                                                                                                                                 |
| P | Q52981 | DE | pH adaptation potassium efflux system protein D;                                                                                                                                                                                                              |
| P | Q52981 | DR | potassium:hydrogen antiporter activity part of a K <sup>+</sup> efflux system which is required for the adaptation of K.menotti to alkaline pH as well as for the infection process during symbiotic nodule development                                       |
| P | Q52982 | CC | alkaline pH as well as for the infection process during symbiotic nodule development                                                                                                                                                                          |
| P | Q52982 | DE | Probable K <sup>+</sup> /H <sup>+</sup> antiporter subunit E;                                                                                                                                                                                                 |
| P | Q52982 | DE | Probable K <sup>+</sup> /H <sup>+</sup> antiporter subunit E;                                                                                                                                                                                                 |
| P | Q52982 | DE | pH adaptation potassium efflux system protein E; part of a K <sup>+</sup> efflux system which is required for the adaptation of K.menotti to alkaline pH as well as for the infection process during symbiotic nodule development                             |
| P | Q52983 | CC | alkaline pH as well as for the infection process during symbiotic nodule development                                                                                                                                                                          |
| P | Q52983 | DE | Probable K <sup>+</sup> /H <sup>+</sup> antiporter subunit F;                                                                                                                                                                                                 |
| P | Q52983 | DE | Probable K <sup>+</sup> /H <sup>+</sup> antiporter subunit F;                                                                                                                                                                                                 |
| P | Q52983 | DE | pH adaptation potassium efflux system protein F;                                                                                                                                                                                                              |
| P | Q53148 | DE | Ethanolamine permease; Can also transport glucose, but not galactose, fructose, mannose, cellobiose, sucrose, maltose, lactose, melibiose and trehalose, as well as N-acetylglucosamine                                                                       |
| P | Q53922 | CC | glucose transmembrane transporter activity                                                                                                                                                                                                                    |
| P | Q53922 | DR | glucose transmembrane transporter activity                                                                                                                                                                                                                    |
| P | Q53P54 | DE | Phosphate transporter 4;6;                                                                                                                                                                                                                                    |
| P | Q53SA1 | DE | Inwardly-rectifying potassium channel Kir7.1;                                                                                                                                                                                                                 |
| P | Q53SA1 | DE | Potassium inwardly-rectifying channel, subfamily J, member 13;                                                                                                                                                                                                |
| P | Q53SA1 | DE | cDNA, FLJ94677, highly similar to Homo sapiens potassium inwardly-rectifying channel, subfamily J, member 13 (KCNJ13), mRNA;                                                                                                                                  |
| P | Q53SA1 | DR | inward rectifier potassium channel activity                                                                                                                                                                                                                   |
| P | Q53Y30 | DE | potassium voltage-gated channel, KCQ1-like subfamily, member 2, isoform 1                                                                                                                                                                                     |

|   |        |    |                                                                                                                                                                                                                                                                                                                                                                               |
|---|--------|----|-------------------------------------------------------------------------------------------------------------------------------------------------------------------------------------------------------------------------------------------------------------------------------------------------------------------------------------------------------------------------------|
| P | Q53Y30 | DE | Potassium voltage-gated channel, KQT-like subfamily, member 2;                                                                                                                                                                                                                                                                                                                |
| P | Q53Y30 | DR | voltage-gated potassium channel activity                                                                                                                                                                                                                                                                                                                                      |
| P | Q547S7 | DE | Potassium voltage-gated channel, subfamily G, member 4, isoform CRA_b;                                                                                                                                                                                                                                                                                                        |
| P | Q547S7 | DE | Voltage-gated potassium channel subunit Kv6.3;                                                                                                                                                                                                                                                                                                                                |
| P | Q547S7 | DR | voltage-gated potassium channel activity                                                                                                                                                                                                                                                                                                                                      |
| P | Q54AX6 | CC | Chloride channels may have several functions including the regulation of cell volume, membrane potential stabilization and signal transduction (By similarity).                                                                                                                                                                                                               |
| P | Q54AX6 | CC | Voltage-gated chloride channel                                                                                                                                                                                                                                                                                                                                                |
| P | Q54AX6 | DE | Chloride channel protein A;                                                                                                                                                                                                                                                                                                                                                   |
| P | Q54AX6 | DR | voltage-gated chloride channel activity                                                                                                                                                                                                                                                                                                                                       |
| P | Q54BF6 | CC | Phosphate is cotransported with H+ (By similarity).                                                                                                                                                                                                                                                                                                                           |
| P | Q54BF6 | CC | Transports phosphate groups from the cytosol to the mitochondrial matrix                                                                                                                                                                                                                                                                                                      |
| P | Q54C67 | CC | Chloride channels may have several functions including the regulation of cell volume, membrane potential stabilization and signal transduction (By similarity).                                                                                                                                                                                                               |
| P | Q54C67 | CC | Voltage-gated chloride channel                                                                                                                                                                                                                                                                                                                                                |
| P | Q54C67 | DE | Chloride channel protein F;                                                                                                                                                                                                                                                                                                                                                   |
| P | Q54C67 | DR | voltage-gated chloride channel activity                                                                                                                                                                                                                                                                                                                                       |
| P | Q54GU0 | DR | arsenite transmembrane transporter activity                                                                                                                                                                                                                                                                                                                                   |
| P | Q54LQ4 | CC | Chloride channels may have several functions including the regulation of cell volume, membrane potential stabilization and signal transduction (By similarity).                                                                                                                                                                                                               |
| P | Q54LQ4 | CC | Voltage-gated chloride channel                                                                                                                                                                                                                                                                                                                                                |
| P | Q54LQ4 | DE | Chloride channel protein E;                                                                                                                                                                                                                                                                                                                                                   |
| P | Q54LQ4 | DR | voltage-gated chloride channel activity                                                                                                                                                                                                                                                                                                                                       |
| P | Q54PY7 | CC | Catalyzes the transport of 2-oxoglutarate across the inner mitochondrial membrane in an electroneutral exchange for malate or other dicarboxylic acids, and plays an important role in several metabolic processes, including the malate-aspartate shuttle, the oxoglutarate/isocitrate shuttle, in gluconeogenesis from lactate, and in nitrogen metabolism (By similarity). |
| P | Q54PY7 | CC | Catalyzes the transport of 2-oxoglutarate across the inner mitochondrial membrane in an electroneutral exchange for malate or other dicarboxylic acids, and plays an important role in several metabolic processes, including the malate-aspartate shuttle, the oxoglutarate/isocitrate shuttle, in gluconeogenesis from lactate, and in nitrogen metabolism (By similarity). |
| P | Q54PY7 | DE | Probable mitochondrial 2-oxoglutarate/malate carrier protein;                                                                                                                                                                                                                                                                                                                 |
| P | Q54PY7 | DE | Probable mitochondrial 2-oxoglutarate/malate carrier protein;                                                                                                                                                                                                                                                                                                                 |
| P | Q54QN2 | CC | Transports folate across the inner membranes of mitochondria (By similarity).                                                                                                                                                                                                                                                                                                 |
| P | Q55106 | CC | Part of the ABC transporter complex CmpABCD involved in bicarbonate transport                                                                                                                                                                                                                                                                                                 |
| P | Q55106 | DE | Bicarbonate transport system permease protein CmpB;                                                                                                                                                                                                                                                                                                                           |
| P | Q55107 | CC | Part of the ABC transporter complex CmpABCD involved in bicarbonate transport                                                                                                                                                                                                                                                                                                 |
| P | Q55107 | DE | Bicarbonate transport ATP-binding protein CmpC;                                                                                                                                                                                                                                                                                                                               |
| P | Q55108 | CC | Part of the ABC transporter complex CmpABCD involved in bicarbonate transport                                                                                                                                                                                                                                                                                                 |
| P | Q55108 | DE | Bicarbonate transport ATP-binding protein CmpD;                                                                                                                                                                                                                                                                                                                               |
| P | Q55108 | DR | nitrate transmembrane transporter activity                                                                                                                                                                                                                                                                                                                                    |
| P | Q55195 | CC | Part of the ABC transporter complex PstSACB involved in phosphate import                                                                                                                                                                                                                                                                                                      |
| P | Q55195 | DE | ABC phosphate transporter 2;                                                                                                                                                                                                                                                                                                                                                  |
| P | Q55195 | DE | Phosphate import ATP-binding protein PstB 2;                                                                                                                                                                                                                                                                                                                                  |
| P | Q55195 | DE | Phosphate-transporting ATPase 2;                                                                                                                                                                                                                                                                                                                                              |
| P | Q55195 | DR | inorganic phosphate transmembrane transporter activity                                                                                                                                                                                                                                                                                                                        |
| P | Q55195 | DR | phosphate transmembrane-transporting ATPase activity                                                                                                                                                                                                                                                                                                                          |
| P | Q55196 | CC | Part of the ABC transporter complex PstSACB involved in phosphate import                                                                                                                                                                                                                                                                                                      |
| P | Q55196 | DE | ABC phosphate transporter 1;                                                                                                                                                                                                                                                                                                                                                  |
| P | Q55196 | DE | Phosphate import ATP-binding protein PstB 1;                                                                                                                                                                                                                                                                                                                                  |
| P | Q55196 | DE | Phosphate-transporting ATPase 1;                                                                                                                                                                                                                                                                                                                                              |
| P | Q55196 | DR | inorganic phosphate transmembrane transporter activity                                                                                                                                                                                                                                                                                                                        |
| P | Q55196 | DR | phosphate transmembrane-transporting ATPase activity                                                                                                                                                                                                                                                                                                                          |
| P | Q55281 | CC | Part of an ATP-driven transport system for manganese.                                                                                                                                                                                                                                                                                                                         |
| P | Q55281 | DE | Manganese transport system ATP-binding protein MntA;                                                                                                                                                                                                                                                                                                                          |
| P | Q55282 | CC | Part of an ATP-driven transport system for manganese.                                                                                                                                                                                                                                                                                                                         |
| P | Q55282 | DE | Manganese transport system membrane protein mntB;                                                                                                                                                                                                                                                                                                                             |
| P | Q552S0 | DE | Sodium/hydrogen exchanger 1;                                                                                                                                                                                                                                                                                                                                                  |
| P | Q552S0 | DR | sodium:hydrogen antiporter activity                                                                                                                                                                                                                                                                                                                                           |
| P | Q553K4 | CC | Divalent transition metal (iron and manganese) transporter (By similarity).                                                                                                                                                                                                                                                                                                   |
| P | Q55460 | CC | Binds bicarbonate with high affinity (By similarity).                                                                                                                                                                                                                                                                                                                         |
| P | Q55460 | CC | Part of the ABC transporter complex CmpABCD involved in bicarbonate transport                                                                                                                                                                                                                                                                                                 |
| P | Q55460 | DE | Bicarbonate-binding protein CmpA;                                                                                                                                                                                                                                                                                                                                             |

|   |        |    |                                                                                                                                                                                                                                         |
|---|--------|----|-----------------------------------------------------------------------------------------------------------------------------------------------------------------------------------------------------------------------------------------|
| P | Q55461 | CC | part of the ABC transporter complex CmpABCD involved in bicarbonate transport                                                                                                                                                           |
| P | Q55461 | DE | Bicarbonate transport system permease protein CmpB;                                                                                                                                                                                     |
| P | Q55462 | CC | part of the ABC transporter complex CmpABCD involved in bicarbonate transport                                                                                                                                                           |
| P | Q55462 | DE | Bicarbonate transport ATP-binding protein CmpC;                                                                                                                                                                                         |
| P | Q55463 | CC | part of the ABC transporter complex CmpABCD involved in bicarbonate transport                                                                                                                                                           |
| P | Q55463 | DE | Bicarbonate transport ATP-binding protein CmpD;                                                                                                                                                                                         |
| P | Q55463 | DR | nitrate transmembrane transporter activity                                                                                                                                                                                              |
| P | Q55835 | CC | Probably part of a periplasmic ABC transporter complex futA1A2BC (TC 3.A.1.10.2) involved in Fe(3+) ion import (ferric iron)                                                                                                            |
| P | Q55835 | DE | Iron deficiency-induced protein A;                                                                                                                                                                                                      |
| P | Q55835 | DE | Iron uptake protein A2;                                                                                                                                                                                                                 |
| P | Q55BF4 | CC | Transports oxaloacetate and sulfate (By similarity). <b>NQK</b> complex catalyzes the reduction of ubiquinone-1 to ubiquinol by two successive reactions, coupled with the transport of Na+ ions from the cytoplasm to the periplasm    |
| P | Q56582 | CC | successive reactions, coupled with the transport of Na+ ions from the cytoplasm to the periplasm                                                                                                                                        |
| P | Q56582 | DE | Na+-translocating NADH-quinone reductase subunit C;                                                                                                                                                                                     |
| P | Q56582 | DE | Na+-translocating NADH-quinone reductase subunit gamma; <b>NQK</b> complex catalyzes the reduction of ubiquinone-1 to ubiquinol by two successive reactions, coupled with the transport of Na+ ions from the cytoplasm to the periplasm |
| P | Q56584 | CC | successive reactions, coupled with the transport of Na+ ions from the cytoplasm to the periplasm                                                                                                                                        |
| P | Q56584 | DE | Na+-translocating NADH-quinone reductase subunit F;                                                                                                                                                                                     |
| P | Q56584 | DE | Na+-translocating NADH-quinone reductase subunit beta; <b>NQK</b> complex catalyzes the reduction of ubiquinone-1 to ubiquinol by two successive reactions, coupled with the transport of Na+ ions from the cytoplasm to the periplasm  |
| P | Q56586 | CC | successive reactions, coupled with the transport of Na+ ions from the cytoplasm to the periplasm                                                                                                                                        |
| P | Q56586 | DE | Na+-translocating NADH-quinone reductase subunit A;                                                                                                                                                                                     |
| P | Q56586 | DE | Na+-translocating NADH-quinone reductase subunit alpha; <b>NQK</b> complex catalyzes the reduction of ubiquinone-1 to ubiquinol by two successive reactions, coupled with the transport of Na+ ions from the cytoplasm to the periplasm |
| P | Q56587 | CC | successive reactions, coupled with the transport of Na+ ions from the cytoplasm to the periplasm                                                                                                                                        |
| P | Q56587 | DE | Na+-translocating NADH-quinone reductase subunit B; <b>NQK</b> complex catalyzes the reduction of ubiquinone-1 to ubiquinol by two successive reactions, coupled with the transport of Na+ ions from the cytoplasm to the periplasm     |
| P | Q56589 | CC | successive reactions, coupled with the transport of Na+ ions from the cytoplasm to the periplasm                                                                                                                                        |
| P | Q56589 | DE | Na+-translocating NADH-quinone reductase subunit E;                                                                                                                                                                                     |
| P | Q56724 | DR | sodium ion transmembrane transporter activity                                                                                                                                                                                           |
| P | Q56725 | CC | Na+/H+ antiporter that extrudes sodium in exchange for external protons                                                                                                                                                                 |
| P | Q56725 | DE | Na+/H+ antiporter nhaA;                                                                                                                                                                                                                 |
| P | Q56725 | DE | Sodium/proton antiporter nhaA;                                                                                                                                                                                                          |
| P | Q56991 | CC | Part of the binding-protein-dependent transport system for hemin.                                                                                                                                                                       |
| P | Q56991 | DE | Hemin-binding periplasmic protein hmuT;                                                                                                                                                                                                 |
| P | Q56992 | CC | Part of the binding-protein-dependent transport system for hemin; probably responsible for the translocation of the substrate across the membrane.                                                                                      |
| P | Q56992 | DE | Hemin transport system permease protein hmuU;                                                                                                                                                                                           |
| P | Q56993 | CC | Part of the ABC transporter complex HmuTUV involved in hemin import                                                                                                                                                                     |
| P | Q56993 | DE | Hemin import ATP-binding protein HmuV;                                                                                                                                                                                                  |
| P | Q56XP4 | CC | Involved in vacuolar ion compartmentalization necessary for cell volume regulation and cytoplasmic Na+ detoxification.                                                                                                                  |
| P | Q56XP4 | DE | Na+/H+ exchanger 2;                                                                                                                                                                                                                     |
| P | Q56XP4 | DE | Sodium/hydrogen exchanger 2;                                                                                                                                                                                                            |
| P | Q56XP4 | DR | sodium:hydrogen antiporter activity                                                                                                                                                                                                     |
| P | Q57071 | CC | This system is involved in glucose transport                                                                                                                                                                                            |
| P | Q57071 | DE | Glucose permease IIC component;                                                                                                                                                                                                         |
| P | Q57071 | DE | Glucose-specific phosphotransferase enzyme IIA component;                                                                                                                                                                               |
| P | Q57071 | DE | Glucose-specific phosphotransferase enzyme IIB component;                                                                                                                                                                               |
| P | Q57071 | DE | PTS system glucose-specific EIIA component;                                                                                                                                                                                             |
| P | Q57071 | DE | PTS system glucose-specific EIIB component;                                                                                                                                                                                             |
| P | Q57071 | DE | PTS system glucose-specific EIIC component;                                                                                                                                                                                             |
| P | Q57071 | DE | PTS system glucose-specific EIICBA component;                                                                                                                                                                                           |
| P | Q57071 | DR | glucose transmembrane transporter activity <b>NQK</b> complex catalyzes the reduction of ubiquinone-1 to ubiquinol by two successive reactions, coupled with the transport of Na+ ions from the cytoplasm to the periplasm              |
| P | Q57095 | CC | successive reactions, coupled with the transport of Na+ ions from the cytoplasm to the periplasm                                                                                                                                        |
| P | Q57095 | DE | Na+-translocating NADH-quinone reductase subunit D;                                                                                                                                                                                     |
| P | Q57603 | CC | Voltage-gated potassium-selective channel opened by hyperpolarization.                                                                                                                                                                  |
| P | Q57603 | DE | Hyperpolarization-activated voltage-gated potassium channel;                                                                                                                                                                            |
| P | Q57603 | DR | voltage-gated potassium channel activity                                                                                                                                                                                                |
| P | Q576H3 | CC | Part of the ABC transporter complex XylFGH involved in xylose import                                                                                                                                                                    |
| P | Q576H3 | DE | Xylose import ATP-binding protein XylG;                                                                                                                                                                                                 |
| P | Q576K0 | CC | Part of the ABC transporter complex ZnuABC involved in zinc import                                                                                                                                                                      |
| P | Q576K0 | DE | Zinc import ATP-binding protein ZnuC;                                                                                                                                                                                                   |

|   |        |    |                                                                                                                                                                                         |
|---|--------|----|-----------------------------------------------------------------------------------------------------------------------------------------------------------------------------------------|
| P | Q576K0 | DR | zinc transporting ATPase activity                                                                                                                                                       |
| P | Q576K1 | CC | Involved in the high-affinity zinc uptake transport system                                                                                                                              |
| P | Q576K1 | DE | High-affinity zinc uptake system protein znuA;                                                                                                                                          |
| P | Q578E9 | DR | glycerol-3-phosphate-transporting ATPase activity                                                                                                                                       |
| P | Q579H8 | CC | Part of the ABC transporter complex MetNIQ involved in methionine import                                                                                                                |
| P | Q579H8 | DE | Methionine import ATP-binding protein MetN;                                                                                                                                             |
| P | Q579Z3 | DR | molybdate transmembrane-transporting ATPase activity                                                                                                                                    |
| P | Q57AC2 | CC | Part of the ABC transporter complex PstSACB involved in phosphate import                                                                                                                |
| P | Q57AC2 | DE | ABC phosphate transporter;                                                                                                                                                              |
| P | Q57AC2 | DE | Phosphate import ATP-binding protein PstB;                                                                                                                                              |
| P | Q57AC2 | DE | Phosphate-transporting ATPase;                                                                                                                                                          |
| P | Q57AC2 | DR | inorganic phosphate transmembrane transporter activity                                                                                                                                  |
| P | Q57AC2 | DR | phosphate transmembrane-transporting ATPase activity                                                                                                                                    |
| P | Q57BC2 | CC | Part of the ABC transporter complex ThiBPQ involved in thiamine import                                                                                                                  |
| P | Q57BC2 | DE | Thiamine import ATP-binding protein ThiQ;                                                                                                                                               |
| P | Q57BC3 | CC | Part of the ABC transporter complex thiBPQ involved in thiamine import                                                                                                                  |
| P | Q57BC3 | DE | Thiamine transport system permease protein thiP;                                                                                                                                        |
| P | Q57BC4 | CC | Part of the ABC transporter complex imiBPQ involved in iminine import (By similarity)                                                                                                   |
| P | Q57BC4 | DE | Thiamine-binding periplasmic protein;                                                                                                                                                   |
| P | Q57CC4 | CC | Transport of potassium into the cell (By similarity).                                                                                                                                   |
| P | Q57CC4 | DE | Probable potassium transport system protein kup;                                                                                                                                        |
| P | Q57CC4 | DR | potassium ion transmembrane transporter activity                                                                                                                                        |
| P | Q57DS9 | DE | Lipoprotein-releasing system ATP-binding protein LolD;                                                                                                                                  |
| P | Q57DS9 | DR | lipoprotein transporter activity                                                                                                                                                        |
| P | Q57FS7 | CC | Part of the ABC transporter complex CcmAB involved in the biogenesis of c-type cytochromes; once thought to export heme, this seems not to be the case, but its exact role is uncertain |
| P | Q57FS7 | DE | Heme exporter protein A;                                                                                                                                                                |
| P | Q57FS7 | DR | heme-transporting ATPase activity                                                                                                                                                       |
| P | Q58418 | CC | Part of the ABC transporter complex PstSACB involved in phosphate import                                                                                                                |
| P | Q58418 | DE | ABC phosphate transporter;                                                                                                                                                              |
| P | Q58418 | DE | Phosphate import ATP-binding protein PstB;                                                                                                                                              |
| P | Q58418 | DE | Phosphate-transporting ATPase;                                                                                                                                                          |
| P | Q58418 | DR | inorganic phosphate transmembrane transporter activity                                                                                                                                  |
| P | Q58418 | DR | phosphate transmembrane-transporting ATPase activity                                                                                                                                    |
| P | Q58419 | CC | Part of the binding-protein-dependent transport system for phosphate; probably responsible for the translocation of the substrate across the membrane (By similarity)                   |
| P | Q58419 | DE | Probable phosphate transport system permease protein pstA;                                                                                                                              |
| P | Q58419 | DR | inorganic phosphate transmembrane transporter activity                                                                                                                                  |
| P | Q58420 | CC | Part of the binding-protein-dependent transport system for phosphate; probably responsible for the translocation of the substrate across the membrane (By similarity)                   |
| P | Q58420 | DE | Probable phosphate transport system permease protein pstC;                                                                                                                              |
| P | Q58420 | DR | inorganic phosphate transmembrane transporter activity                                                                                                                                  |
| P | Q58421 | CC | Part of the ABC transporter complex pstSACB involved in phosphate import (By similarity).                                                                                               |
| P | Q58421 | DE | Phosphate-binding protein pstS;                                                                                                                                                         |
| P | Q58421 | DR | inorganic phosphate transmembrane transporter activity                                                                                                                                  |
| P | Q58439 | CC | Mediates influx of magnesium ions.                                                                                                                                                      |
| P | Q58439 | DE | Magnesium transport protein CorA;                                                                                                                                                       |
| P | Q58439 | DR | magnesium ion transmembrane transporter activity                                                                                                                                        |
| P | Q58490 | DR | cobalt ion transmembrane transporter activity                                                                                                                                           |
| P | Q58I19 | DE | Na <sup>+</sup> /K <sup>+</sup> transporting ATPase beta 2 polypeptide;                                                                                                                 |
| P | Q58I19 | DE | Na <sup>+</sup> /K <sup>+</sup> transporting ATPase beta 2 polypeptide;                                                                                                                 |
| P | Q58I19 | DR | sodium:potassium-exchanging ATPase activity                                                                                                                                             |
| P | Q58I19 | DR | sodium:potassium-exchanging ATPase activity                                                                                                                                             |
| P | Q59584 | CC | This is an energy-conserving, sodium-ion translocating step.                                                                                                                            |
| P | Q5DTL9 | CC | Electrogenic sodium/bicarbonate cotransporter in exchange for intracellular chloride                                                                                                    |
| P | Q5DTL9 | CC | Electrogenic sodium/bicarbonate cotransporter in exchange for intracellular chloride                                                                                                    |
| P | Q5DTL9 | DE | Sodium-driven chloride bicarbonate exchanger;                                                                                                                                           |
| P | Q5EE02 | DR | serotonin:sodium symporter activity                                                                                                                                                     |
| P | Q5EE02 | DR | serotonin:sodium symporter activity                                                                                                                                                     |
| P | Q5ERC7 | DE | Glucose transporter 9b;                                                                                                                                                                 |
| P | Q5ERC7 | DR | glucose transmembrane transporter activity                                                                                                                                              |
| P | Q5F5G9 | CC | Involved in the import of serine and threonine into the cell, with the concomitant import of sodium (symport system) (By similarity).                                                   |

|   |        |    |                                                                                                                                                                                         |
|---|--------|----|-----------------------------------------------------------------------------------------------------------------------------------------------------------------------------------------|
| P | Q5F5G9 | CC | Involved in the import of serine and threonine into the cell, with the concomitant import of sodium (symport system) (By similarity).                                                   |
| P | Q5F5G9 | DE | Na <sup>+</sup> /serine-threonine symporter;                                                                                                                                            |
| P | Q5F5G9 | DE | Na <sup>+</sup> /serine-threonine symporter;                                                                                                                                            |
| P | Q5F5G9 | DE | Serine/threonine transporter sstT;                                                                                                                                                      |
| P | Q5F5G9 | DR | sodium:dicarboxylate symporter activity                                                                                                                                                 |
| P | Q5F8K2 | DE | Lipoprotein-releasing system ATP-binding protein LolD;                                                                                                                                  |
| P | Q5F8K2 | DR | lipoprotein transporter activity                                                                                                                                                        |
| P | Q5FKL2 | CC | Part of the ABC transporter complex MetNIQ involved in methionine import                                                                                                                |
| P | Q5FKL2 | DE | Methionine import ATP-binding protein MetN;                                                                                                                                             |
| P | Q5FL41 | CC | Part of the ABC transporter complex PotABCD involved in spermidine/putrescine import                                                                                                    |
| P | Q5FL41 | CC | Part of the ABC transporter complex PotABCD involved in spermidine/putrescine import                                                                                                    |
| P | Q5FL41 | DE | Spermidine/putrescine import ATP-binding protein PotA;                                                                                                                                  |
| P | Q5FL41 | DE | Spermidine/putrescine import ATP-binding protein PotA;                                                                                                                                  |
| P | Q5FLF5 | CC | Transport of potassium into the cell (By similarity).                                                                                                                                   |
| P | Q5FLF5 | DE | Probable potassium transport system protein kup 2;                                                                                                                                      |
| P | Q5FLF5 | DR | potassium ion transmembrane transporter activity                                                                                                                                        |
| P | Q5FM17 | CC | Part of the ABC transporter complex PstSACB involved in phosphate import                                                                                                                |
| P | Q5FM17 | DE | ABC phosphate transporter 2;                                                                                                                                                            |
| P | Q5FM17 | DE | Phosphate import ATP-binding protein PstB 2;                                                                                                                                            |
| P | Q5FM17 | DE | Phosphate-transporting ATPase 2;                                                                                                                                                        |
| P | Q5FM17 | DR | inorganic phosphate transmembrane transporter activity                                                                                                                                  |
| P | Q5FM17 | DR | phosphate transmembrane-transporting ATPase activity                                                                                                                                    |
| P | Q5FM18 | CC | Part of the ABC transporter complex PstSACB involved in phosphate import                                                                                                                |
| P | Q5FM18 | DE | ABC phosphate transporter 1;                                                                                                                                                            |
| P | Q5FM18 | DE | Phosphate import ATP-binding protein PstB 1;                                                                                                                                            |
| P | Q5FM18 | DE | Phosphate-transporting ATPase 1;                                                                                                                                                        |
| P | Q5FM18 | DR | inorganic phosphate transmembrane transporter activity                                                                                                                                  |
| P | Q5FM18 | DR | phosphate transmembrane-transporting ATPase activity                                                                                                                                    |
| P | Q5FMK7 | CC | Transport of potassium into the cell (By similarity).                                                                                                                                   |
| P | Q5FMK7 | DE | Probable potassium transport system protein kup 1;                                                                                                                                      |
| P | Q5FMK7 | DR | potassium ion transmembrane transporter activity                                                                                                                                        |
| P | Q5FNE6 | CC | Na <sup>+</sup> /H <sup>+</sup> antiporter that extrudes sodium in exchange for external protons (By similarity)                                                                        |
| P | Q5FNE6 | DE | Na <sup>+</sup> /H <sup>+</sup> antiporter nhaA;                                                                                                                                        |
| P | Q5FNE6 | DE | Sodium/proton antiporter nhaA;                                                                                                                                                          |
| P | Q5FQL0 | CC | Transport of potassium into the cell (By similarity).                                                                                                                                   |
| P | Q5FQL0 | DE | Probable potassium transport system protein kup;                                                                                                                                        |
| P | Q5FQL0 | DR | potassium ion transmembrane transporter activity                                                                                                                                        |
| P | Q5FQN4 | CC | Part of the ABC transporter complex CcmAB involved in the biogenesis of c-type cytochromes; once thought to export heme, this seems not to be the case, but its exact role is uncertain |
| P | Q5FQN4 | DE | Heme exporter protein A;                                                                                                                                                                |
| P | Q5FQN4 | DR | heme-transporting ATPase activity                                                                                                                                                       |
| P | Q5FT15 | CC | Part of the ABC transporter complex PstSACB involved in phosphate import                                                                                                                |
| P | Q5FT15 | DE | ABC phosphate transporter;                                                                                                                                                              |
| P | Q5FT15 | DE | Phosphate import ATP-binding protein PstB;                                                                                                                                              |
| P | Q5FT15 | DE | Phosphate-transporting ATPase;                                                                                                                                                          |
| P | Q5FT15 | DR | inorganic phosphate transmembrane transporter activity                                                                                                                                  |
| P | Q5FT15 | DR | phosphate transmembrane-transporting ATPase activity                                                                                                                                    |
| P | Q5FUV5 | DE | Lipoprotein-releasing system ATP-binding protein LolD;                                                                                                                                  |
| P | Q5FUV5 | DR | lipoprotein transporter activity                                                                                                                                                        |
| P | Q5GRS1 | CC | Part of the ABC transporter complex ZnuABC involved in zinc import                                                                                                                      |
| P | Q5GRS1 | DE | Zinc import ATP-binding protein ZnuC;                                                                                                                                                   |
| P | Q5GRS1 | DR | zinc transporting ATPase activity                                                                                                                                                       |
| P | Q5HAV5 | CC | Part of the ABC transporter complex PstSACB involved in phosphate import                                                                                                                |
| P | Q5HAV5 | DE | ABC phosphate transporter;                                                                                                                                                              |
| P | Q5HAV5 | DE | Phosphate import ATP-binding protein PstB;                                                                                                                                              |
| P | Q5HAV5 | DE | Phosphate-transporting ATPase;                                                                                                                                                          |
| P | Q5HAV5 | DR | inorganic phosphate transmembrane transporter activity                                                                                                                                  |
| P | Q5HAV5 | DR | phosphate transmembrane-transporting ATPase activity                                                                                                                                    |
| P | Q5HBR8 | CC | Part of the ABC transporter complex ZnuABC involved in zinc import                                                                                                                      |
| P | Q5HBR8 | DE | Zinc import ATP-binding protein ZnuC;                                                                                                                                                   |
| P | Q5HBR8 | DR | zinc transporting ATPase activity                                                                                                                                                       |
| P | Q5HC57 | DE | Lipoprotein-releasing system ATP-binding protein LolD;                                                                                                                                  |
| P | Q5HC57 | DR | lipoprotein transporter activity                                                                                                                                                        |

|   |        |    |                                                                                                                                                                                                            |
|---|--------|----|------------------------------------------------------------------------------------------------------------------------------------------------------------------------------------------------------------|
| P | Q5HCZ3 | CC | Involved in copper export (By similarity).                                                                                                                                                                 |
| P | Q5HCZ3 | DE | Copper-exporting P-type ATPase A;                                                                                                                                                                          |
| P | Q5HCZ3 | DR | copper-exporting ATPase activity                                                                                                                                                                           |
| P | Q5HD13 | DR | glucose transmembrane transporter activity                                                                                                                                                                 |
| P | Q5HE14 | CC | This system is involved in lactose transport (By similarity).                                                                                                                                              |
| P | Q5HE14 | DE | Lactose-specific phosphotransferase enzyme IIA component;                                                                                                                                                  |
| P | Q5HE14 | DE | PTS system lactose-specific EIIA component;                                                                                                                                                                |
| P | Q5HE15 | CC | This system is involved in lactose transport.                                                                                                                                                              |
| P | Q5HE15 | DE | Lactose permease IIC component;                                                                                                                                                                            |
| P | Q5HE15 | DE | Lactose-specific phosphotransferase enzyme IIB component;                                                                                                                                                  |
| P | Q5HE15 | DE | PTS system lactose-specific EIIB component;                                                                                                                                                                |
| P | Q5HE15 | DE | PTS system lactose-specific EIIC component;                                                                                                                                                                |
| P | Q5HE15 | DE | PTS system lactose-specific EIICB component;                                                                                                                                                               |
| P | Q5HE46 | CC | This system is involved in mannitol transport (By similarity).                                                                                                                                             |
| P | Q5HE46 | DE | Mannitol-specific phosphotransferase enzyme IIA component;                                                                                                                                                 |
| P | Q5HE46 | DE | PTS system mannitol-specific EIIA component;                                                                                                                                                               |
| P | Q5HE48 | CC | This system is involved in mannitol transport.                                                                                                                                                             |
| P | Q5HE48 | DE | Mannitol permease IIC component;                                                                                                                                                                           |
| P | Q5HE48 | DE | Mannitol-specific phosphotransferase enzyme IIB component;                                                                                                                                                 |
| P | Q5HE48 | DE | PTS system mannitol-specific EIIB component;                                                                                                                                                               |
| P | Q5HE48 | DE | PTS system mannitol-specific EIIC component;                                                                                                                                                               |
| P | Q5HE48 | DE | PTS system mannitol-specific EIICB component;                                                                                                                                                              |
| P | Q5HEC4 | CC | One of the components of the high-affinity ATP-driven potassium transport (or KDP) system, which catalyzes the hydrolysis of ATP coupled with the exchange of hydrogen and potassium ions (By similarity). |
| P | Q5HEC4 | DE | Potassium-binding and translocating subunit B;                                                                                                                                                             |
| P | Q5HEC4 | DE | Potassium-translocating ATPase B chain;                                                                                                                                                                    |
| P | Q5HEC4 | DE | Potassium-transporting ATPase B chain;                                                                                                                                                                     |
| P | Q5HEC4 | DR | potassium-transporting ATPase activity                                                                                                                                                                     |
| P | Q5HEK4 | CC | mediates the transport of the dicarboxylates fumarate, malate, and succinate across the cytoplasmic membrane via a Na <sup>+</sup> - electrochemical gradient (By similarity)                              |
| P | Q5HEK4 | DE | Na <sup>+</sup> /dicarboxylate symporter;                                                                                                                                                                  |
| P | Q5HEK4 | DE | Na <sup>+</sup> /dicarboxylate symporter;                                                                                                                                                                  |
| P | Q5HEK4 | DE | Sodium-dependent dicarboxylate transporter sdcS;                                                                                                                                                           |
| P | Q5HEK4 | DE | Sodium-dependent dicarboxylate transporter sdcS;                                                                                                                                                           |
| P | Q5HEM0 | CC | Catalyzes the sodium-dependent uptake of extracellular L-proline (By similarity)                                                                                                                           |
| P | Q5HEM0 | CC | Since most S.aureus strains are L- proline auxotrophs, this transporter may aid the bacterial persistence during an infection of tissues with low proline concentrations (By similarity).                  |
| P | Q5HEM0 | DE | Proline permease;                                                                                                                                                                                          |
| P | Q5HEM0 | DE | Sodium/proline symporter;                                                                                                                                                                                  |
| P | Q5HEM0 | DE | Sodium/proline symporter;                                                                                                                                                                                  |
| P | Q5HEM0 | DR | proline:sodium symporter activity                                                                                                                                                                          |
| P | Q5HEM0 | DR | proline:sodium symporter activity                                                                                                                                                                          |
| P | Q5HF02 | CC | Thought to form the channel of an arsenite pump.                                                                                                                                                           |
| P | Q5HF02 | DR | arsenite transmembrane transporter activity                                                                                                                                                                |
| P | Q5HFZ9 | CC | This system is involved in glucose transport (By similarity).                                                                                                                                              |
| P | Q5HFZ9 | DE | Glucose-specific phosphotransferase enzyme IIA component;                                                                                                                                                  |
| P | Q5HFZ9 | DE | PTS system glucose-specific EIIA component;                                                                                                                                                                |
| P | Q5HG31 | CC | Part of the ABC transporter complex pstSACB involved in phosphate import (By similarity).                                                                                                                  |
| P | Q5HG31 | DE | Phosphate-binding protein pstS;                                                                                                                                                                            |
| P | Q5HG38 | CC | Part of a transport system that may be involved in oligopeptide uptake                                                                                                                                     |
| P | Q5HG38 | DE | Putative oligopeptide transport system permease protein oppB2;                                                                                                                                             |
| P | Q5HG39 | CC | Part of a transport system that may be involved in oligopeptide uptake                                                                                                                                     |
| P | Q5HG39 | DE | Putative oligopeptide transport system permease protein oppC2;                                                                                                                                             |
| P | Q5HG40 | CC | Part of a transport system that may be involved in oligopeptide uptake                                                                                                                                     |
| P | Q5HG40 | DE | Putative oligopeptide transport ATP-binding protein oppD2;                                                                                                                                                 |
| P | Q5HG41 | CC | Part of a transport system that may be involved in oligopeptide uptake                                                                                                                                     |
| P | Q5HG41 | DE | Putative oligopeptide transport ATP-binding protein oppF2;                                                                                                                                                 |
| P | Q5HGV1 | DE | Iron-regulated surface determinant protein E;                                                                                                                                                              |
| P | Q5HGV1 | DE | Staphylococcal iron-regulated protein F;                                                                                                                                                                   |
| P | Q5HGV1 | DR | iron ion transmembrane transporter activity                                                                                                                                                                |
| P | Q5HGX9 | CC | H <sup>+</sup> -stimulated, highly selective, manganese uptake system (By similarity).                                                                                                                     |
| P | Q5HGX9 | DE | Probable manganese transport protein mntH;                                                                                                                                                                 |

|   |        |    |                                                                                                                                                                                                            |
|---|--------|----|------------------------------------------------------------------------------------------------------------------------------------------------------------------------------------------------------------|
| P | Q5HGY5 | CC | part of the ABC transporter complex PotABCD involved in                                                                                                                                                    |
| P | Q5HGY5 | CC | part of the ABC transporter complex PotABCD involved in                                                                                                                                                    |
| P | Q5HGY5 | DE | spermidine/putrescine import                                                                                                                                                                               |
| P | Q5HGY5 | DE | Spermidine/putrescine import ATP-binding protein PotA;                                                                                                                                                     |
| P | Q5HHD3 | CC | Mnh complex is a Na <sup>+</sup> /H <sup>+</sup> antiporter involved in Na <sup>+</sup> excretion (By similarity).                                                                                         |
| P | Q5HHD3 | DE | Na <sup>+</sup> /H <sup>+</sup> antiporter subunit A1;                                                                                                                                                     |
| P | Q5HHD4 | CC | Mnh complex is a Na <sup>+</sup> /H <sup>+</sup> antiporter involved in Na <sup>+</sup> excretion (By similarity).                                                                                         |
| P | Q5HHD4 | DE | Na <sup>+</sup> /H <sup>+</sup> antiporter subunit B1;                                                                                                                                                     |
| P | Q5HHD5 | CC | Mnh complex is a Na <sup>+</sup> /H <sup>+</sup> antiporter involved in Na <sup>+</sup> excretion (By similarity).                                                                                         |
| P | Q5HHD5 | DE | Na <sup>+</sup> /H <sup>+</sup> antiporter subunit C1;                                                                                                                                                     |
| P | Q5HHD6 | CC | Mnh complex is a Na <sup>+</sup> /H <sup>+</sup> antiporter involved in Na <sup>+</sup> excretion (By similarity).                                                                                         |
| P | Q5HHD6 | DE | Na <sup>+</sup> /H <sup>+</sup> antiporter subunit D1;                                                                                                                                                     |
| P | Q5HHD7 | CC | Mnh complex is a Na <sup>+</sup> /H <sup>+</sup> antiporter involved in Na <sup>+</sup> excretion (By similarity).                                                                                         |
| P | Q5HHD7 | DE | Na <sup>+</sup> /H <sup>+</sup> antiporter subunit E1;                                                                                                                                                     |
| P | Q5HHD8 | CC | Mnh complex is a Na <sup>+</sup> /H <sup>+</sup> antiporter involved in Na <sup>+</sup> excretion (By similarity).                                                                                         |
| P | Q5HHD8 | DE | Na <sup>+</sup> /H <sup>+</sup> antiporter subunit F1;                                                                                                                                                     |
| P | Q5HHD9 | CC | Mnh complex is a Na <sup>+</sup> /H <sup>+</sup> antiporter involved in Na <sup>+</sup> excretion (By similarity).                                                                                         |
| P | Q5HHD9 | DE | Na <sup>+</sup> /H <sup>+</sup> antiporter subunit G1;                                                                                                                                                     |
| P | Q5HHK4 | CC | Part of the ABC transporter complex MetNIQ involved in methionine import                                                                                                                                   |
| P | Q5HHK4 | DE | Methionine import ATP-binding protein MetN 2;                                                                                                                                                              |
| P | Q5HIA2 | DE | Putative proline/betaine transporter;                                                                                                                                                                      |
| P | Q5HIL5 | CC | Part of the ABC transporter complex MetNIQ involved in methionine import                                                                                                                                   |
| P | Q5HIL5 | DE | Methionine import ATP-binding protein MetN 1;                                                                                                                                                              |
| P | Q5HJA6 | CC | Could be involved in the uptake of ribose (By similarity).                                                                                                                                                 |
| P | Q5HJA6 | DE | Putative ribose uptake protein rbsU;                                                                                                                                                                       |
| P | Q5HJI3 | CC | This system is involved in glucose transport (By similarity).                                                                                                                                              |
| P | Q5HJI3 | DE | Glucose permease IIC component;                                                                                                                                                                            |
| P | Q5HJI3 | DE | Glucose-specific phosphotransferase enzyme IIA component;                                                                                                                                                  |
| P | Q5HJI3 | DE | Glucose-specific phosphotransferase enzyme IIB component;                                                                                                                                                  |
| P | Q5HJI3 | DE | PTS system glucose-specific EIIA component;                                                                                                                                                                |
| P | Q5HJI3 | DE | PTS system glucose-specific EIIB component;                                                                                                                                                                |
| P | Q5HJI3 | DE | PTS system glucose-specific EIIC component;                                                                                                                                                                |
| P | Q5HJI3 | DE | PTS system glucose-specific EIICBA component;                                                                                                                                                              |
| P | Q5HJI3 | DR | glucose transmembrane transporter activity                                                                                                                                                                 |
| P | Q5HJM6 | DR | phosphonate transmembrane-transporting ATPase activity                                                                                                                                                     |
| P | Q5HK63 | CC | One of the components of the high-affinity ATP-driven potassium transport (or KDP) system, which catalyzes the hydrolysis of ATP coupled with the exchange of hydrogen and potassium ions (By similarity). |
| P | Q5HK63 | DE | Potassium-binding and translocating subunit A;                                                                                                                                                             |
| P | Q5HK63 | DE | Potassium-translocating ATPase A chain;                                                                                                                                                                    |
| P | Q5HK63 | DE | Potassium-transporting ATPase A chain;                                                                                                                                                                     |
| P | Q5HK63 | DR | potassium-transporting ATPase activity                                                                                                                                                                     |
| P | Q5HK64 | CC | One of the components of the high-affinity ATP-driven potassium transport (or KDP) system, which catalyzes the hydrolysis of ATP coupled with the exchange of hydrogen and potassium ions (By similarity). |
| P | Q5HK64 | DE | Potassium-binding and translocating subunit B;                                                                                                                                                             |
| P | Q5HK64 | DE | Potassium-translocating ATPase B chain;                                                                                                                                                                    |
| P | Q5HK64 | DE | Potassium-transporting ATPase B chain;                                                                                                                                                                     |
| P | Q5HK64 | DR | potassium-transporting ATPase activity                                                                                                                                                                     |
| P | Q5HK65 | CC | One of the components of the high-affinity ATP-driven potassium transport (or KDP) system, which catalyzes the hydrolysis of ATP coupled with the exchange of hydrogen and potassium ions                  |
| P | Q5HK65 | DE | Potassium-binding and translocating subunit C;                                                                                                                                                             |
| P | Q5HK65 | DE | Potassium-translocating ATPase C chain;                                                                                                                                                                    |
| P | Q5HK65 | DE | Potassium-transporting ATPase C chain;                                                                                                                                                                     |
| P | Q5HK65 | DR | potassium-transporting ATPase activity                                                                                                                                                                     |
| P | Q5HKB0 | CC | Involved in copper transport (By similarity).                                                                                                                                                              |
| P | Q5HKB0 | DE | Probable copper-transporting P-type ATPase B;                                                                                                                                                              |
| P | Q5HKB0 | DR | copper-exporting ATPase activity                                                                                                                                                                           |
| P | Q5HKQ8 | DR | phosphonate transmembrane-transporting ATPase activity                                                                                                                                                     |
| P | Q5HL56 | CC | Involved in copper export (By similarity).                                                                                                                                                                 |
| P | Q5HL56 | DE | Copper-exporting P-type ATPase A;                                                                                                                                                                          |
| P | Q5HL56 | DR | copper-exporting ATPase activity                                                                                                                                                                           |
| P | Q5HL73 | CC | This system is involved in glucose transport (By similarity).                                                                                                                                              |
| P | Q5HL73 | DE | Glucose permease IIC component;                                                                                                                                                                            |



|   |        |    |                                                                                                                    |
|---|--------|----|--------------------------------------------------------------------------------------------------------------------|
| P | Q5HL73 | DE | Glucose-specific phosphotransferase enzyme IIA component;                                                          |
| P | Q5HL73 | DE | Glucose-specific phosphotransferase enzyme IIB component;                                                          |
| P | Q5HL73 | DE | PTS system glucose-specific EIIA component;                                                                        |
| P | Q5HL73 | DE | PTS system glucose-specific EIIB component;                                                                        |
| P | Q5HL73 | DE | PTS system glucose-specific EIIC component;                                                                        |
| P | Q5HL73 | DE | PTS system glucose-specific EIICBA component;                                                                      |
| P | Q5HL73 | DR | glucose transmembrane transporter activity                                                                         |
| P | Q5HLK7 | CC | Also possibly involved in excretion of nitrite produced by the dissimilatory reduction of nitrate (By similarity). |
| P | Q5HLK7 | CC | Probably required for nitrate uptake under anoxic conditions                                                       |
| P | Q5HLK7 | DE | Probable nitrate transporter narT;                                                                                 |
| P | Q5HLZ2 | CC | Involved in the uptake of glucose (By similarity).                                                                 |
| P | Q5HLZ2 | DE | Probable glucose uptake protein glcU;                                                                              |
| P | Q5HM39 | CC | This system is involved in lactose transport (By similarity).                                                      |
| P | Q5HM39 | DE | Lactose-specific phosphotransferase enzyme IIA component;                                                          |
| P | Q5HM39 | DE | PTS system lactose-specific EIIA component;                                                                        |
| P | Q5HM40 | CC | This system is involved in lactose transport.                                                                      |
| P | Q5HM40 | DE | Lactose permease IIC component;                                                                                    |
| P | Q5HM40 | DE | Lactose-specific phosphotransferase enzyme IIB component;                                                          |
| P | Q5HM40 | DE | PTS system lactose-specific EIIB component;                                                                        |
| P | Q5HM40 | DE | PTS system lactose-specific EIIC component;                                                                        |
| P | Q5HM40 | DE | PTS system lactose-specific EIICB component;                                                                       |
| P | Q5HN32 | CC | Catalyzes the sodium-dependent uptake of extracellular L-proline (By similarity).                                  |
| P | Q5HN32 | DE | Proline permease;                                                                                                  |
| P | Q5HN32 | DE | Sodium/proline symporter;                                                                                          |
| P | Q5HN32 | DE | Sodium/proline symporter;                                                                                          |
| P | Q5HN32 | DR | proline:sodium symporter activity                                                                                  |
| P | Q5HN32 | DR | proline:sodium symporter activity                                                                                  |
| P | Q5HPB5 | CC | This system is involved in glucose transport (By similarity).                                                      |
| P | Q5HPB5 | DE | Glucose-specific phosphotransferase enzyme IIA component;                                                          |
| P | Q5HPB5 | DE | PTS system glucose-specific EIIA component;                                                                        |
| P | Q5HPF2 | CC | Part of the ABC transporter complex pstSACB involved in phosphate import (By similarity).                          |
| P | Q5HPF2 | DE | Phosphate-binding protein pstS;                                                                                    |
| P | Q5HPF5 | CC | Part of the ABC transporter complex PstSACB involved in phosphate import                                           |
| P | Q5HPF5 | DE | ABC phosphate transporter;                                                                                         |
| P | Q5HPF5 | DE | Phosphate import ATP-binding protein PstB;                                                                         |
| P | Q5HPF5 | DE | Phosphate-transporting ATPase;                                                                                     |
| P | Q5HPF5 | DR | inorganic phosphate transmembrane transporter activity                                                             |
| P | Q5HPF5 | DR | phosphate transmembrane-transporting ATPase activity                                                               |
| P | Q5HQ64 | CC | H <sup>+</sup> -stimulated, highly selective, manganese uptake system (By similarity).                             |
| P | Q5HQ64 | DE | Probable manganese transport protein mntH;                                                                         |
| P | Q5HQ70 | CC | Part of the ABC transporter complex POTABCD involved in spermidine/putrescine import                               |
| P | Q5HQ70 | CC | Part of the ABC transporter complex POTABCD involved in spermidine/putrescine import                               |
| P | Q5HQ70 | DE | Spermidine/putrescine import ATP-binding protein PotA;                                                             |
| P | Q5HQ70 | DE | Spermidine/putrescine import ATP-binding protein PotA;                                                             |
| P | Q5HQL0 | CC | Mnh complex is a Na <sup>+</sup> /H <sup>+</sup> antiporter involved in Na <sup>+</sup> excretion (By similarity). |
| P | Q5HQL0 | DE | Na <sup>+</sup> /H <sup>+</sup> antiporter subunit A1;                                                             |
| P | Q5HQL1 | CC | Mnh complex is a Na <sup>+</sup> /H <sup>+</sup> antiporter involved in Na <sup>+</sup> excretion (By similarity). |
| P | Q5HQL1 | DE | Na <sup>+</sup> /H <sup>+</sup> antiporter subunit B1;                                                             |
| P | Q5HQL2 | CC | Mnh complex is a Na <sup>+</sup> /H <sup>+</sup> antiporter involved in Na <sup>+</sup> excretion (By similarity). |
| P | Q5HQL2 | DE | Na <sup>+</sup> /H <sup>+</sup> antiporter subunit C1;                                                             |
| P | Q5HQL3 | CC | Mnh complex is a Na <sup>+</sup> /H <sup>+</sup> antiporter involved in Na <sup>+</sup> excretion (By similarity). |
| P | Q5HQL3 | DE | Na <sup>+</sup> /H <sup>+</sup> antiporter subunit D1;                                                             |
| P | Q5HQL4 | CC | Mnh complex is a Na <sup>+</sup> /H <sup>+</sup> antiporter involved in Na <sup>+</sup> excretion (By similarity). |
| P | Q5HQL4 | DE | Na <sup>+</sup> /H <sup>+</sup> antiporter subunit E1;                                                             |
| P | Q5HQL5 | CC | Mnh complex is a Na <sup>+</sup> /H <sup>+</sup> antiporter involved in Na <sup>+</sup> excretion (By similarity). |
| P | Q5HQL5 | DE | Na <sup>+</sup> /H <sup>+</sup> antiporter subunit F1;                                                             |
| P | Q5HQL6 | CC | Mnh complex is a Na <sup>+</sup> /H <sup>+</sup> antiporter involved in Na <sup>+</sup> excretion (By similarity). |
| P | Q5HQL6 | DE | Na <sup>+</sup> /H <sup>+</sup> antiporter subunit G1;                                                             |
| P | Q5HQQ9 | CC | Part of the ABC transporter complex MetNIQ involved in methionine import                                           |
| P | Q5HQQ9 | DE | Methionine import ATP-binding protein MetN 2;                                                                      |
| P | Q5HRH0 | CC | May be a proton symporter involved in the uptake of osmolytes such as proline and glycine betaine (By similarity). |
| P | Q5HRH0 | DE | Putative proline/betaine transporter;                                                                              |

|   |        |    |                                                                                                                                                                                                            |
|---|--------|----|------------------------------------------------------------------------------------------------------------------------------------------------------------------------------------------------------------|
| P | Q5HRH0 | DE | Putative proline/betaine transporter;                                                                                                                                                                      |
| P | Q5HRI3 | CC | Thought to form the channel of an arsenite pump.                                                                                                                                                           |
| P | Q5HRI3 | DR | arsenite transmembrane transporter activity                                                                                                                                                                |
| P | Q5HRU5 | CC | Part of the ABC transporter complex MetNIQ involved in methionine import                                                                                                                                   |
| P | Q5HRU5 | DE | Methionine import ATP-binding protein MetN 1;                                                                                                                                                              |
| P | Q5JEP9 | CC | Part of the ABC transporter complex PstSACB involved in phosphate import                                                                                                                                   |
| P | Q5JEP9 | DE | ABC phosphate transporter;                                                                                                                                                                                 |
| P | Q5JEP9 | DE | Phosphate import ATP-binding protein PstB;                                                                                                                                                                 |
| P | Q5JEP9 | DE | Phosphate-transporting ATPase;                                                                                                                                                                             |
| P | Q5JEP9 | DR | inorganic phosphate transmembrane transporter activity                                                                                                                                                     |
| P | Q5JEP9 | DR | phosphate transmembrane-transporting ATPase activity                                                                                                                                                       |
| P | Q5JK32 | CC | High-affinity potassium transporter (By similarity).                                                                                                                                                       |
| P | Q5JK32 | DE | Potassium transporter 5;                                                                                                                                                                                   |
| P | Q5JK32 | DR | potassium ion transmembrane transporter activity                                                                                                                                                           |
| P | Q5JMH0 | CC | High-affinity potassium transporter (By similarity).                                                                                                                                                       |
| P | Q5JMH0 | DE | Potassium transporter 6;                                                                                                                                                                                   |
| P | Q5JMH0 | DR | potassium ion transmembrane transporter activity                                                                                                                                                           |
| P | Q5KQN0 | CC | Translocates Ca <sup>2+</sup> and other metal ions into vacuoles using the proton gradient formed by H <sup>+</sup> -ATPase and H <sup>+</sup> -pyrophosphatase.                                           |
| P | Q5KQN0 | DE | Ca <sup>2+</sup> /H <sup>+</sup> exchanger 2;                                                                                                                                                              |
| P | Q5KTQ9 | CC | Translocates Ca <sup>2+</sup> and other metal ions into vacuoles using the proton gradient formed by H <sup>+</sup> -ATPase and H <sup>+</sup> -pyrophosphatase.                                           |
| P | Q5KTQ9 | DE | Ca <sup>2+</sup> /H <sup>+</sup> exchanger 1c;                                                                                                                                                             |
| P | Q5KUV3 | CC | One of the components of the high-affinity ATP-driven potassium transport (or KDP) system, which catalyzes the hydrolysis of ATP coupled with the exchange of hydrogen and potassium ions (By similarity). |
| P | Q5KUV3 | DE | Potassium-binding and translocating subunit A;                                                                                                                                                             |
| P | Q5KUV3 | DE | Potassium-translocating ATPase A chain;                                                                                                                                                                    |
| P | Q5KUV3 | DE | Potassium-transporting ATPase A chain;                                                                                                                                                                     |
| P | Q5KUV3 | DR | potassium-transporting ATPase activity                                                                                                                                                                     |
| P | Q5KUX3 | CC | Part of the ABC transporter complex RbsABCD involved in ribose import                                                                                                                                      |
| P | Q5KUX3 | DE | Ribose import ATP-binding protein RbsA;                                                                                                                                                                    |
| P | Q5KVK2 | CC | Part of the ABC transporter complex MetNIQ involved in methionine import                                                                                                                                   |
| P | Q5KVK2 | DE | Methionine import ATP-binding protein MetN;                                                                                                                                                                |
| P | Q5KX47 | CC | Part of the ABC transporter complex PstSACB involved in phosphate import                                                                                                                                   |
| P | Q5KX47 | DE | ABC phosphate transporter;                                                                                                                                                                                 |
| P | Q5KX47 | DE | Phosphate import ATP-binding protein PstB;                                                                                                                                                                 |
| P | Q5KX47 | DE | Phosphate-transporting ATPase;                                                                                                                                                                             |
| P | Q5KX47 | DR | inorganic phosphate transmembrane transporter activity                                                                                                                                                     |
| P | Q5KX47 | DR | phosphate transmembrane-transporting ATPase activity                                                                                                                                                       |
| P | Q5KYS1 | CC | Part of the ABC transporter complex XylFGH involved in xylose import                                                                                                                                       |
| P | Q5KYS1 | DE | Xylose import ATP-binding protein XylG;                                                                                                                                                                    |
| P | Q5KYS1 | DR | D-xylose-importing ATPase activity                                                                                                                                                                         |
| P | Q5L222 | CC | Part of the ABC transporter complex PotABCD involved in spermidine/putrescine import                                                                                                                       |
| P | Q5L222 | CC | Part of the ABC transporter complex PotABCD involved in spermidine/putrescine import                                                                                                                       |
| P | Q5L222 | DE | Spermidine/putrescine import ATP-binding protein PotA;                                                                                                                                                     |
| P | Q5L222 | DE | Spermidine/putrescine import ATP-binding protein PotA;                                                                                                                                                     |
| P | Q5L5E6 | CC | The arginine uptake by the bacterium in the macrophage may be a virulence factor against the host innate immune response (By similarity).                                                                  |
| P | Q5L5E6 | DE | Arginine/agmatine antiporter;                                                                                                                                                                              |
| P | Q5L5Z1 | CC | Part of the ABC transporter complex MetNIQ involved in methionine import                                                                                                                                   |
| P | Q5L5Z1 | DE | Methionine import ATP-binding protein MetN;                                                                                                                                                                |
| P | Q5LR15 | CC | Part of the ABC transporter complex CcmAB involved in the biogenesis of c-type cytochromes; once thought to export heme, this seems not to be the case, but its exact role is uncertain                    |
| P | Q5LR15 | DE | Heme exporter protein A;                                                                                                                                                                                   |
| P | Q5LR15 | DR | heme-transporting ATPase activity                                                                                                                                                                          |
| P | Q5LS19 | CC | Part of the ABC transporter complex PstSACB involved in phosphate import                                                                                                                                   |
| P | Q5LS19 | DE | ABC phosphate transporter;                                                                                                                                                                                 |
| P | Q5LS19 | DE | Phosphate import ATP-binding protein PstB;                                                                                                                                                                 |
| P | Q5LS19 | DE | Phosphate-transporting ATPase;                                                                                                                                                                             |
| P | Q5LS19 | DR | inorganic phosphate transmembrane transporter activity                                                                                                                                                     |
| P | Q5LS19 | DR | phosphate transmembrane-transporting ATPase activity                                                                                                                                                       |
| P | Q5LT05 | CC | Part of the ABC transporter complex PotABCD involved in spermidine/putrescine import                                                                                                                       |
| P | Q5LT05 | CC | Part of the ABC transporter complex PotABCD involved in spermidine/putrescine import                                                                                                                       |

|   |        |    |                                                                                                                                                                             |
|---|--------|----|-----------------------------------------------------------------------------------------------------------------------------------------------------------------------------|
| P | Q5LT05 | DE | Spermidine/putrescine import ATP-binding protein PotA;                                                                                                                      |
| P | Q5LT05 | DE | Spermidine/putrescine import ATP-binding protein PotA;                                                                                                                      |
| P | Q5LUD0 | DE | Lipoprotein-releasing system ATP-binding protein LolD;                                                                                                                      |
| P | Q5LUD0 | DR | lipoprotein transporter activity                                                                                                                                            |
| P | Q5LUR8 | CC | Part of the ABC transporter complex ZnuABC involved in zinc import                                                                                                          |
| P | Q5LUR8 | DE | Zinc import ATP-binding protein ZnuC;                                                                                                                                       |
| P | Q5LUR8 | DR | zinc transporting ATPase activity                                                                                                                                           |
| P | Q5LVC2 | DR | phosphonate transmembrane-transporting ATPase activity                                                                                                                      |
| P | Q5LVM5 | CC | Part of the ABC transporter complex TauABC involved in taurine import                                                                                                       |
| P | Q5LVM5 | DE | Taurine import ATP-binding protein TauB;                                                                                                                                    |
| P | Q5LVM5 | DR | taurine-transporting ATPase activity                                                                                                                                        |
| P | Q5LX21 | DR | glycerol-3-phosphate-transporting ATPase activity                                                                                                                           |
| P | Q5LYN4 | CC | Part of the ABC transporter complex PotABCD involved in                                                                                                                     |
| P | Q5LYN4 | CC | Part of the ABC transporter complex PotABCD involved in                                                                                                                     |
| P | Q5LYN4 | DE | Spermidine/putrescine import ATP-binding protein PotA;                                                                                                                      |
| P | Q5LYN4 | DE | Spermidine/putrescine import ATP-binding protein PotA;                                                                                                                      |
| P | Q5LZU2 | CC | Part of the ABC transporter complex PstSACB involved in phosphate import                                                                                                    |
| P | Q5LZU2 | DE | ABC phosphate transporter 2;                                                                                                                                                |
| P | Q5LZU2 | DE | Phosphate import ATP-binding protein PstB 2;                                                                                                                                |
| P | Q5LZU2 | DE | Phosphate-transporting ATPase 2;                                                                                                                                            |
| P | Q5LZU2 | DR | inorganic phosphate transmembrane transporter activity                                                                                                                      |
| P | Q5LZU2 | DR | phosphate transmembrane-transporting ATPase activity                                                                                                                        |
| P | Q5LZU3 | CC | Part of the ABC transporter complex PstSACB involved in phosphate import                                                                                                    |
| P | Q5LZU3 | DE | ABC phosphate transporter 1;                                                                                                                                                |
| P | Q5LZU3 | DE | Phosphate import ATP-binding protein PstB 1;                                                                                                                                |
| P | Q5LZU3 | DE | Phosphate-transporting ATPase 1;                                                                                                                                            |
| P | Q5LZU3 | DR | inorganic phosphate transmembrane transporter activity                                                                                                                      |
| P | Q5LZU3 | DR | phosphate transmembrane-transporting ATPase activity                                                                                                                        |
| P | Q5M0A4 | DE | Calcium transporter P-type ATPase;                                                                                                                                          |
| P | Q5M0A4 | DR | calcium-transporting ATPase activity                                                                                                                                        |
| P | Q5M1F4 | CC | Involved in the import of serine and threonine into the cell, with the concomitant import of sodium (symport system) (By similarity).                                       |
| P | Q5M1F4 | CC | Involved in the import of serine and threonine into the cell, with the concomitant import of sodium (symport system) (By similarity).                                       |
| P | Q5M1F4 | DE | Na <sup>+</sup> /serine-threonine symporter;                                                                                                                                |
| P | Q5M1F4 | DE | Na <sup>+</sup> /serine-threonine symporter;                                                                                                                                |
| P | Q5M1F4 | DE | Serine/threonine transporter sstT;                                                                                                                                          |
| P | Q5M1F4 | DR | sodium:dicarboxylate symporter activity                                                                                                                                     |
| P | Q5M1F6 | CC | Part of the ABC transporter complex MetNIQ involved in methionine import                                                                                                    |
| P | Q5M1F6 | DE | Methionine import ATP-binding protein MetN;                                                                                                                                 |
| P | Q5MZ53 | CC | Part of the ABC transporter complex CmpABCD involved in bicarbonate transport                                                                                               |
| P | Q5MZ53 | DE | Bicarbonate transport ATP-binding protein CmpD;                                                                                                                             |
| P | Q5MZ53 | DR | nitrate transmembrane transporter activity                                                                                                                                  |
| P | Q5MZ54 | CC | Part of the ABC transporter complex CmpABCD involved in bicarbonate transport                                                                                               |
| P | Q5MZ54 | DE | Bicarbonate transport ATP-binding protein CmpC;                                                                                                                             |
| P | Q5MZ54 | DR | nitrate transmembrane transporter activity                                                                                                                                  |
| P | Q5MZ55 | CC | Part of the ABC transporter complex CmpABCD involved in bicarbonate transport                                                                                               |
| P | Q5MZ55 | DE | Bicarbonate transport system permease protein CmpB;                                                                                                                         |
| P | Q5MZ55 | DR | nitrate transmembrane transporter activity                                                                                                                                  |
| P | Q5MZ56 | CC | Binds bicarbonate with high affinity (By similarity).                                                                                                                       |
| P | Q5MZ56 | CC | Part of the ABC transporter complex CmpABCD involved in bicarbonate transport                                                                                               |
| P | Q5MZ56 | DE | Bicarbonate-binding protein CmpA;                                                                                                                                           |
| P | Q5N0R0 | CC | Plays an important role in protecting the acceptor side of photosystem II (PSII) against oxidative damage, especially under iron-limiting growth conditions (By similarity) |
| P | Q5N0R0 | DE | Iron deficiency-induced protein A;                                                                                                                                          |
| P | Q5N1G5 | CC | Part of the ABC transporter complex PstSACB involved in phosphate import                                                                                                    |
| P | Q5N1G5 | DE | ABC phosphate transporter;                                                                                                                                                  |
| P | Q5N1G5 | DE | Phosphate import ATP-binding protein PstB;                                                                                                                                  |
| P | Q5N1G5 | DE | Phosphate-transporting ATPase;                                                                                                                                              |
| P | Q5N1G5 | DR | inorganic phosphate transmembrane transporter activity                                                                                                                      |
| P | Q5N1G5 | DR | phosphate transmembrane-transporting ATPase activity                                                                                                                        |
| P | Q5NC32 | CC | Proton-linked monocarboxylate transporter                                                                                                                                   |
| P | Q5NC32 | DE | Monocarboxylate transporter 11;                                                                                                                                             |
| P | Q5NCE8 | CC | Magnesium transporter that may mediate the influx of magnesium into the mitochondrial matrix (By similarity).                                                               |

|   |        |    |                                                                                                                                                                                         |
|---|--------|----|-----------------------------------------------------------------------------------------------------------------------------------------------------------------------------------------|
| P | Q5NCE8 | DE | Magnesium transporter MRS2 homolog, mitochondrial;                                                                                                                                      |
| P | Q5NCM1 | CC | May be involved in actively transporting phosphate into cells via Na <sup>+</sup> cotransport (By similarity).                                                                          |
| P | Q5NCM1 | CC | May be involved in actively transporting phosphate into cells via Na <sup>+</sup> cotransport (By similarity).                                                                          |
| P | Q5NCM1 | DE | Putative small intestine sodium-dependent phosphate transport protein;                                                                                                                  |
| P | Q5NCM1 | DE | Putative small intestine sodium-dependent phosphate transport protein;                                                                                                                  |
| P | Q5NE91 | CC | Na <sup>+</sup> /H <sup>+</sup> antiporter that extrudes sodium in exchange for external protons (By similarity).                                                                       |
| P | Q5NE91 | DE | Na <sup>+</sup> /H <sup>+</sup> antiporter nhaA;                                                                                                                                        |
| P | Q5NE91 | DE | Sodium/proton antiporter nhaA;                                                                                                                                                          |
| P | Q5NFU5 | CC | Part of the ABC transporter complex MetNIQ involved in methionine import                                                                                                                |
| P | Q5NFU5 | DE | Methionine import ATP-binding protein MetN;                                                                                                                                             |
| P | Q5NHP2 | DE | Lipoprotein-releasing system ATP-binding protein LolD;                                                                                                                                  |
| P | Q5NHP2 | DR | lipoprotein transporter activity                                                                                                                                                        |
| P | Q5NN77 | CC | Transport of potassium into the cell (By similarity).                                                                                                                                   |
| P | Q5NN77 | DE | Probable potassium transport system protein kup;                                                                                                                                        |
| P | Q5NN77 | DR | potassium ion transmembrane transporter activity                                                                                                                                        |
| P | Q5NNN6 | CC | Part of the ABC transporter complex PstSACB involved in phosphate import                                                                                                                |
| P | Q5NNN6 | DE | ABC phosphate transporter;                                                                                                                                                              |
| P | Q5NNN6 | DE | Phosphate import ATP-binding protein PstB;                                                                                                                                              |
| P | Q5NNN6 | DE | Phosphate-transporting ATPase;                                                                                                                                                          |
| P | Q5NNN6 | DR | inorganic phosphate transmembrane transporter activity                                                                                                                                  |
| P | Q5NNN6 | DR | phosphate transmembrane-transporting ATPase activity                                                                                                                                    |
| P | Q5NQX0 | CC | Part of the ABC transporter complex CcmAB involved in the biogenesis of c-type cytochromes; once thought to export heme, this seems not to be the case, but its exact role is uncertain |
| P | Q5NQX0 | DE | Heme exporter protein A;                                                                                                                                                                |
| P | Q5NQX0 | DR | heme-transporting ATPase activity                                                                                                                                                       |
| P | Q5NRB1 | CC | Na <sup>+</sup> /H <sup>+</sup> antiporter that extrudes sodium in exchange for external protons (By similarity).                                                                       |
| P | Q5NRB1 | DE | Na <sup>+</sup> /H <sup>+</sup> antiporter nhaA;                                                                                                                                        |
| P | Q5NRB1 | DE | Sodium/proton antiporter nhaA;                                                                                                                                                          |
| P | Q5NZT6 | DE | Lipoprotein-releasing system ATP-binding protein LolD;                                                                                                                                  |
| P | Q5NZT6 | DR | lipoprotein transporter activity                                                                                                                                                        |
| P | Q5P1F3 | CC | Part of the ABC transporter complex PstSACB involved in phosphate import                                                                                                                |
| P | Q5P1F3 | DE | ABC phosphate transporter;                                                                                                                                                              |
| P | Q5P1F3 | DE | Phosphate import ATP-binding protein PstB;                                                                                                                                              |
| P | Q5P1F3 | DE | Phosphate-transporting ATPase;                                                                                                                                                          |
| P | Q5P1F3 | DR | inorganic phosphate transmembrane transporter activity                                                                                                                                  |
| P | Q5P1F3 | DR | phosphate transmembrane-transporting ATPase activity                                                                                                                                    |
| P | Q5P3E3 | CC | Transport of potassium into the cell (By similarity).                                                                                                                                   |
| P | Q5P3E3 | DE | Probable potassium transport system protein kup;                                                                                                                                        |
| P | Q5P3E3 | DR | potassium ion transmembrane transporter activity                                                                                                                                        |
| P | Q5P3L0 | CC | Part of the ABC transporter complex CcmAB involved in the biogenesis of c-type cytochromes; once thought to export heme, this seems not to be the case, but its exact role is uncertain |
| P | Q5P3L0 | DE | Heme exporter protein A;                                                                                                                                                                |
| P | Q5P3L0 | DR | heme-transporting ATPase activity                                                                                                                                                       |
| P | Q5P4W2 | CC | Part of the ABC transporter complex ModABC involved in molybdenum import                                                                                                                |
| P | Q5P4W2 | DE | Molybdenum import ATP-binding protein ModC;                                                                                                                                             |
| P | Q5P4W2 | DR | molybdenum ion transmembrane transporter activity                                                                                                                                       |
| P | Q5PB72 | CC | Part of the ABC transporter complex ZnuABC involved in zinc import                                                                                                                      |
| P | Q5PB72 | DE | Zinc import ATP-binding protein ZnuC;                                                                                                                                                   |
| P | Q5PB72 | DR | zinc transporting ATPase activity                                                                                                                                                       |
| P | Q5PBP5 | CC | Part of the ABC transporter complex CcmAB involved in the biogenesis of c-type cytochromes; once thought to export heme, this seems not to be the case, but its exact role is uncertain |
| P | Q5PBP5 | DE | Heme exporter protein A;                                                                                                                                                                |
| P | Q5PBP5 | DR | heme-transporting ATPase activity                                                                                                                                                       |
| P | Q5PBX2 | DE | Lipoprotein-releasing system ATP-binding protein LolD;                                                                                                                                  |
| P | Q5PBX2 | DR | lipoprotein transporter activity                                                                                                                                                        |
| P | Q5PT53 | DE | Na <sup>+</sup> /bile acid cotransporter 7;                                                                                                                                             |
| P | Q5PT53 | DE | Na <sup>+</sup> /bile acid cotransporter 7;                                                                                                                                             |
| P | Q5PT53 | DE | Sodium/bile acid cotransporter 7;                                                                                                                                                       |
| P | Q5PT53 | DE | Sodium/bile acid cotransporter 7;                                                                                                                                                       |
| P | Q5PT53 | DR | bile acid:sodium symporter activity                                                                                                                                                     |

|   |        |    |                                                                                                                                                                                         |
|---|--------|----|-----------------------------------------------------------------------------------------------------------------------------------------------------------------------------------------|
| P | Q5PT53 | DR | bile acid:sodium symporter activity                                                                                                                                                     |
| P | Q5PT54 | DE | Na <sup>+</sup> /bile acid cotransporter 5;                                                                                                                                             |
| P | Q5PT54 | DE | Na <sup>+</sup> /bile acid cotransporter 5;                                                                                                                                             |
| P | Q5PT54 | DE | Sodium/bile acid cotransporter 5;                                                                                                                                                       |
| P | Q5PT54 | DE | Sodium/bile acid cotransporter 5;                                                                                                                                                       |
| P | Q5PT54 | DR | bile acid:sodium symporter activity                                                                                                                                                     |
| P | Q5PT54 | DR | bile acid:sodium symporter activity                                                                                                                                                     |
| P | Q5PT55 | DE | Na <sup>+</sup> /bile acid cotransporter 5;                                                                                                                                             |
| P | Q5PT55 | DE | Na <sup>+</sup> /bile acid cotransporter 5;                                                                                                                                             |
| P | Q5PT55 | DE | Sodium/bile acid cotransporter 5;                                                                                                                                                       |
| P | Q5PT55 | DE | Sodium/bile acid cotransporter 5;                                                                                                                                                       |
| P | Q5PT55 | DR | bile acid:sodium symporter activity                                                                                                                                                     |
| P | Q5PT55 | DR | bile acid:sodium symporter activity                                                                                                                                                     |
| P | Q5QM84 | CC | Acts as the major ROS-responsive Ca <sup>2+</sup> channel and is the possible target of AI-dependent inhibition                                                                         |
| P | Q5QM84 | CC | may be involved in the regulation of cytosolic Ca <sup>2+</sup> and in growth and development                                                                                           |
| P | Q5QM84 | CC | May function as one of the major voltage-gated Ca <sup>2+</sup> channel (VDCC) across the plasma membrane                                                                               |
| P | Q5QM84 | DE | Two pore calcium channel protein 1;                                                                                                                                                     |
| P | Q5QM84 | DE | Voltage-dependent calcium channel protein TPC1;                                                                                                                                         |
| P | Q5QM84 | DR | calcium channel activity                                                                                                                                                                |
| P | Q5QU46 | DE | Lipoprotein-releasing system ATP-binding protein LolD;                                                                                                                                  |
| P | Q5QU46 | DR | lipoprotein transporter activity                                                                                                                                                        |
| P | Q5QVB0 | CC | Part of the ABC transporter complex PstSACB involved in phosphate import                                                                                                                |
| P | Q5QVB0 | DE | ABC phosphate transporter;                                                                                                                                                              |
| P | Q5QVB0 | DE | Phosphate import ATP-binding protein PstB;                                                                                                                                              |
| P | Q5QVB0 | DE | Phosphate-transporting ATPase;                                                                                                                                                          |
| P | Q5QVB0 | DR | inorganic phosphate transmembrane transporter activity                                                                                                                                  |
| P | Q5QVB0 | DR | phosphate transmembrane-transporting ATPase activity                                                                                                                                    |
| P | Q5QXD0 | CC | Part of the ABC transporter complex HmuTUV involved in hemin import                                                                                                                     |
| P | Q5QXD0 | DE | Hemin import ATP-binding protein HmuV;                                                                                                                                                  |
| P | Q5QZP7 | CC | Part of the ABC transporter complex CcmAB involved in the biogenesis of c-type cytochromes; once thought to export heme, this seems not to be the case, but its exact role is uncertain |
| P | Q5QZP7 | DE | Heme exporter protein A;                                                                                                                                                                |
| P | Q5QZP7 | DR | heme-transporting ATPase activity                                                                                                                                                       |
| P | Q5SR56 | DR | tetracycline:hydrogen antiporter activity                                                                                                                                               |
| P | Q5SWY8 | DE | Na <sup>+</sup> /glucose cotransporter 5;                                                                                                                                               |
| P | Q5SWY8 | DE | Na <sup>+</sup> /glucose cotransporter 5;                                                                                                                                               |
| P | Q5SWY8 | DE | Sodium/glucose cotransporter 5;                                                                                                                                                         |
| P | Q5SWY8 | DE | Sodium/glucose cotransporter 5;                                                                                                                                                         |
| P | Q5SZA1 | CC | Important for the resorption of phosphate by the kidney                                                                                                                                 |
| P | Q5SZA1 | CC | May be involved in actively transporting phosphate into cells via Na <sup>+</sup> cotransport in the renal brush border membrane (By similarity).                                       |
| P | Q5SZA1 | CC | May be involved in actively transporting phosphate into cells via Na <sup>+</sup> cotransport in the renal brush border membrane (By similarity).                                       |
| P | Q5SZA1 | DE | Na <sup>+</sup> /PI cotransporter 3;                                                                                                                                                    |
| P | Q5SZA1 | DE | Sodium-dependent phosphate transport protein 3;                                                                                                                                         |
| P | Q5SZA1 | DE | Sodium-dependent phosphate transport protein 3;                                                                                                                                         |
| P | Q5SZA1 | DE | Sodium/phosphate cotransporter 3;                                                                                                                                                       |
| P | Q5SZA1 | DE | Sodium/phosphate cotransporter 3;                                                                                                                                                       |
| P | Q5TF39 | CC | May function as a sodium-dependent glucose transporter (By similarity).                                                                                                                 |
| P | Q5TF39 | DE | Sodium-dependent glucose transporter 1;                                                                                                                                                 |
| P | Q5TKG3 | CC | Translocates Ca <sup>2+</sup> and other metal ions into vacuoles using the proton gradient formed by H <sup>+</sup> -ATPase and H <sup>+</sup> -pyrophosphatase.                        |
| P | Q5TKG3 | DE | Ca <sup>2+</sup> /H <sup>+</sup> exchanger 1b;                                                                                                                                          |
| P | Q5U4D8 | CC | Transports pantothenate, biotin and lipoate in the presence of sodium.                                                                                                                  |
| P | Q5U4D8 | DE | Na <sup>+</sup> -dependent multivitamin transporter;                                                                                                                                    |
| P | Q5U4D8 | DE | Sodium-dependent multivitamin transporter;                                                                                                                                              |
| P | Q5U680 | DE | Mitochondrial S-adenosylmethionine transporter;                                                                                                                                         |
| P | Q5U680 | DE | S-adenosylmethionine mitochondrial carrier protein;                                                                                                                                     |
| P | Q5U680 | DR | S-adenosylmethionine transmembrane transporter activity                                                                                                                                 |
| P | Q5UW69 | DR | phosphonate transmembrane-transporting ATPase activity                                                                                                                                  |
| P | Q5V0G3 | CC | Part of the ABC transporter complex PstSACB involved in phosphate import                                                                                                                |
| P | Q5V0G3 | DE | ABC phosphate transporter 2;                                                                                                                                                            |

|   |        |    |                                                                                                                                                                                                            |
|---|--------|----|------------------------------------------------------------------------------------------------------------------------------------------------------------------------------------------------------------|
| P | Q5V0G3 | DE | Phosphate import ATP-binding protein PstB 2;                                                                                                                                                               |
| P | Q5V0G3 | DE | Phosphate-transporting ATPase 2;                                                                                                                                                                           |
| P | Q5V0G3 | DR | inorganic phosphate transmembrane transporter activity                                                                                                                                                     |
| P | Q5V0G3 | DR | phosphate transmembrane-transporting ATPase activity                                                                                                                                                       |
| P | Q5V225 | CC | Part of the ABC transporter complex PstSACB involved in phosphate import                                                                                                                                   |
| P | Q5V225 | DE | ABC phosphate transporter 1;                                                                                                                                                                               |
| P | Q5V225 | DE | Phosphate import ATP-binding protein PstB 1;                                                                                                                                                               |
| P | Q5V225 | DE | Phosphate-transporting ATPase 1;                                                                                                                                                                           |
| P | Q5V225 | DR | inorganic phosphate transmembrane transporter activity                                                                                                                                                     |
| P | Q5V225 | DR | phosphate transmembrane-transporting ATPase activity                                                                                                                                                       |
| P | Q5V6B8 | DR | phosphonate transmembrane-transporting ATPase activity                                                                                                                                                     |
| P | Q5VR89 | CC | Aquaporins facilitate the transport of water and small neutral solutes across cell membranes (By similarity).                                                                                              |
| P | Q5YRD1 | CC | Part of the ABC transporter complex MetNIQ involved in methionine import                                                                                                                                   |
| P | Q5YRD1 | DE | Methionine import ATP-binding protein MetN;                                                                                                                                                                |
| P | Q5YTW4 | DR | phosphonate transmembrane-transporting ATPase activity                                                                                                                                                     |
| P | Q5YVL8 | CC | Part of the ABC transporter complex HmuTUV involved in hemin import                                                                                                                                        |
| P | Q5YVL8 | DE | Hemin import ATP-binding protein HmuV;                                                                                                                                                                     |
| P | Q5YZH9 | CC | One of the components of the high-affinity ATP-driven potassium transport (or KDP) system, which catalyzes the hydrolysis of ATP coupled with the exchange of hydrogen and potassium ions (By similarity). |
| P | Q5YZH9 | DE | Potassium-binding and translocating subunit A;                                                                                                                                                             |
| P | Q5YZH9 | DE | Potassium-translocating ATPase A chain;                                                                                                                                                                    |
| P | Q5YZH9 | DE | Potassium-transporting ATPase A chain;                                                                                                                                                                     |
| P | Q5YZH9 | DR | potassium-transporting ATPase activity                                                                                                                                                                     |
| P | Q5YZY9 | CC | Part of the ABC transporter complex CysAW 1P involved in sulfate/inosulfate import                                                                                                                         |
| P | Q5YZY9 | DE | Sulfate-transporting ATPase;                                                                                                                                                                               |
| P | Q5YZY9 | DE | Sulfate/thiosulfate import ATP-binding protein CysA;                                                                                                                                                       |
| P | Q5YZY9 | DR | sulfate transmembrane-transporting ATPase activity                                                                                                                                                         |
| P | Q5Z293 | CC | Part of the ABC transporter complex PstSACB involved in phosphate import                                                                                                                                   |
| P | Q5Z293 | DE | ABC phosphate transporter;                                                                                                                                                                                 |
| P | Q5Z293 | DE | Phosphate import ATP-binding protein PstB;                                                                                                                                                                 |
| P | Q5Z293 | DE | Phosphate-transporting ATPase;                                                                                                                                                                             |
| P | Q5Z293 | DR | inorganic phosphate transmembrane transporter activity                                                                                                                                                     |
| P | Q5Z293 | DR | phosphate transmembrane-transporting ATPase activity                                                                                                                                                       |
| P | Q5Z2Z5 | CC | Na <sup>+</sup> /H <sup>+</sup> antiporter that extrudes sodium in exchange for external protons (By similarity).                                                                                          |
| P | Q5Z2Z5 | DE | Na <sup>+</sup> /H <sup>+</sup> antiporter nhaA;                                                                                                                                                           |
| P | Q5Z2Z5 | DE | Sodium/proton antiporter nhaA;                                                                                                                                                                             |
| P | Q5Z6F0 | CC | Aquaporins facilitate the transport of water and small neutral solutes across cell membranes                                                                                                               |
| P | Q5Z6K9 | CC | High-affinity potassium transporter (By similarity).                                                                                                                                                       |
| P | Q5Z6K9 | DE | Potassium transporter 24;                                                                                                                                                                                  |
| P | Q5Z6K9 | DR | potassium ion transmembrane transporter activity                                                                                                                                                           |
| P | Q5Z9E2 | CC | Aquaporins facilitate the transport of water and small neutral solutes across cell membranes (By similarity).                                                                                              |
| P | Q5ZC87 | CC | High-affinity potassium transporter (By similarity).                                                                                                                                                       |
| P | Q5ZC87 | DE | Probable potassium transporter 3;                                                                                                                                                                          |
| P | Q5ZC87 | DR | potassium ion transmembrane transporter activity                                                                                                                                                           |
| P | Q5ZSY2 | CC | Transport of potassium into the cell (By similarity).                                                                                                                                                      |
| P | Q5ZSY2 | DE | Probable potassium transport system protein kup 3;                                                                                                                                                         |
| P | Q5ZSY2 | DR | potassium ion transmembrane transporter activity                                                                                                                                                           |
| P | Q5ZT78 | DE | Lipoprotein-releasing system ATP-binding protein LolD;                                                                                                                                                     |
| P | Q5ZT78 | DR | lipoprotein transporter activity                                                                                                                                                                           |
| P | Q5ZTN5 | CC | Transport of potassium into the cell (By similarity).                                                                                                                                                      |
| P | Q5ZTN5 | DE | Probable potassium transport system protein kup 2;                                                                                                                                                         |
| P | Q5ZTN5 | DR | potassium ion transmembrane transporter activity                                                                                                                                                           |
| P | Q5ZUG5 | CC | Part of the ABC transporter complex MetNIQ involved in methionine import                                                                                                                                   |
| P | Q5ZUG5 | DE | Methionine import ATP-binding protein MetN;                                                                                                                                                                |
| P | Q5ZW98 | CC | Transport of potassium into the cell (By similarity).                                                                                                                                                      |
| P | Q5ZW98 | DE | Probable potassium transport system protein kup 1;                                                                                                                                                         |
| P | Q5ZW98 | DR | potassium ion transmembrane transporter activity                                                                                                                                                           |
| P | Q5ZWE4 | CC | Part of the ABC transporter complex PotABCD involved in spermidine/putrescine import                                                                                                                       |
| P | Q5ZWE4 | CC | Part of the ABC transporter complex PotABCD involved in spermidine/putrescine import                                                                                                                       |
| P | Q5ZWE4 | DE | Spermidine/putrescine import ATP-binding protein PotA;                                                                                                                                                     |
| P | Q5ZWE4 | DE | Spermidine/putrescine import ATP-binding protein PotA;                                                                                                                                                     |

|   |        |    |                                                                                                                                                                                                            |
|---|--------|----|------------------------------------------------------------------------------------------------------------------------------------------------------------------------------------------------------------|
| P | Q5ZX76 | CC | Part of the ABC transporter complex CcmAB involved in the biogenesis of c-type cytochromes; once thought to export heme, this seems not to be the case, but its exact role is uncertain                    |
| P | Q5ZX76 | DE | Heme exporter protein A;                                                                                                                                                                                   |
| P | Q5ZX76 | DR | heme-transporting ATPase activity                                                                                                                                                                          |
| P | Q604C1 | DE | Lipoprotein-releasing system ATP-binding protein LolD;                                                                                                                                                     |
| P | Q604C1 | DR | lipoprotein transporter activity                                                                                                                                                                           |
| P | Q605R1 | CC | One of the components of the high-affinity ATP-driven potassium transport (or KDP) system, which catalyzes the hydrolysis of ATP coupled with the exchange of hydrogen and potassium ions (By similarity). |
| P | Q605R1 | DE | Potassium-binding and translocating subunit A;                                                                                                                                                             |
| P | Q605R1 | DE | Potassium-translocating ATPase A chain;                                                                                                                                                                    |
| P | Q605R1 | DE | Potassium-transporting ATPase A chain;                                                                                                                                                                     |
| P | Q605R1 | DR | potassium-transporting ATPase activity                                                                                                                                                                     |
| P | Q605R3 | CC | One of the components of the high-affinity ATP-driven potassium transport (or KDP) system, which catalyzes the hydrolysis of ATP coupled with the exchange of hydrogen and potassium ions                  |
| P | Q605R3 | DE | Potassium-binding and translocating subunit C;                                                                                                                                                             |
| P | Q605R3 | DE | Potassium-translocating ATPase C chain;                                                                                                                                                                    |
| P | Q605R3 | DE | Potassium-transporting ATPase C chain;                                                                                                                                                                     |
| P | Q605R3 | DR | potassium-transporting ATPase activity                                                                                                                                                                     |
| P | Q60603 | CC | Pore-forming (alpha) subunit of voltage-gated non- inactivating delayed rectifier potassium channel                                                                                                        |
| P | Q60603 | DE | Ether-a-go-go potassium channel 1;                                                                                                                                                                         |
| P | Q60603 | DE | Potassium voltage-gated channel subfamily H member 1;                                                                                                                                                      |
| P | Q60603 | DE | Voltage-gated potassium channel subunit Kv10.1;                                                                                                                                                            |
| P | Q60603 | DR | voltage-gated potassium channel activity                                                                                                                                                                   |
| P | Q60738 | CC | Lethality of knockout early in gestation suggests a role of the protein in fetal zinc acquisition and retention.                                                                                           |
| P | Q60738 | CC | May be involved in zinc transport out of the cell                                                                                                                                                          |
| P | Q60738 | DE | Zinc transporter 1;                                                                                                                                                                                        |
| P | Q608V9 | CC | Part of the ABC transporter complex ModABC involved in molybdenum import                                                                                                                                   |
| P | Q608V9 | DE | Molybdenum import ATP-binding protein ModC;                                                                                                                                                                |
| P | Q608V9 | DR | molybdenum ion transmembrane transporter activity<br>may function in the transport of nucleosides and/or nucleoside derivatives                                                                            |
| P | Q60961 | CC | between the cytosol and the lumen of an intracellular membrane-bound                                                                                                                                       |
| P | Q609Q1 | CC | Part of the ABC transporter complex CysAW 1F involved in sulfate/inosinate import                                                                                                                          |
| P | Q609Q1 | DE | Sulfate-transporting ATPase;                                                                                                                                                                               |
| P | Q609Q1 | DE | Sulfate/thiosulfate import ATP-binding protein CysA;                                                                                                                                                       |
| P | Q609Q1 | DR | sulfate transmembrane-transporting ATPase activity                                                                                                                                                         |
| P | Q609Z8 | CC | Part of the ABC transporter complex PstSACB involved in phosphate import                                                                                                                                   |
| P | Q609Z8 | DE | ABC phosphate transporter;                                                                                                                                                                                 |
| P | Q609Z8 | DE | Phosphate import ATP-binding protein PstB;                                                                                                                                                                 |
| P | Q609Z8 | DE | Phosphate-transporting ATPase;                                                                                                                                                                             |
| P | Q609Z8 | DR | inorganic phosphate transmembrane transporter activity                                                                                                                                                     |
| P | Q609Z8 | DR | phosphate transmembrane-transporting ATPase activity                                                                                                                                                       |
| P | Q60A92 | CC | Transport of potassium into the cell (By similarity).                                                                                                                                                      |
| P | Q60A92 | DE | Probable potassium transport system protein kup;                                                                                                                                                           |
| P | Q60A92 | DR | potassium ion transmembrane transporter activity                                                                                                                                                           |
| P | Q60AB3 | CC | Part of the ABC transporter complex CcmAB involved in the biogenesis of c-type cytochromes; once thought to export heme, this seems not to be the case, but its exact role is uncertain                    |
| P | Q60AB3 | DE | Heme exporter protein A;                                                                                                                                                                                   |
| P | Q60AB3 | DR | heme-transporting ATPase activity                                                                                                                                                                          |
| P | Q60AI1 | CC | Part of the ABC transporter complex PotABCD involved in spermidine/putrescine import                                                                                                                       |
| P | Q60AI1 | CC | Part of the ABC transporter complex PotABCD involved in spermidine/putrescine import                                                                                                                       |
| P | Q60AI1 | DE | Spermidine/putrescine import ATP-binding protein PotA;                                                                                                                                                     |
| P | Q60AI1 | DE | Spermidine/putrescine import ATP-binding protein PotA;                                                                                                                                                     |
| P | Q61056 | CC | Seems to be also activated by intracellular calcium store depletion.                                                                                                                                       |
| P | Q61056 | CC | thought to form a receptor-activated non-selective calcium permeant cation channel                                                                                                                         |
| P | Q61056 | DR | store-operated calcium channel activity                                                                                                                                                                    |
| P | Q61165 | CC | major proton extruding system driven by the inward sodium ion chemical gradient                                                                                                                            |
| P | Q61165 | DE | Na <sup>+</sup> /H <sup>+</sup> exchanger 1;                                                                                                                                                               |
| P | Q61165 | DE | Sodium/hydrogen exchanger 1;                                                                                                                                                                               |
| P | Q61165 | DR | sodium:hydrogen antiporter activity                                                                                                                                                                        |

|   |        |    |                                                                                               |
|---|--------|----|-----------------------------------------------------------------------------------------------|
| P | Q61180 | CC | Controls the reabsorption of sodium in kidney, colon, lung and sweat glands                   |
| P | Q61180 | CC | Sodium permeable non-voltage-sensitive ion channel inhibited by the diuretic                  |
| P | Q61180 | DE | amiloride                                                                                     |
| P | Q61180 | DE | Amiloride-sensitive sodium channel subunit alpha;                                             |
| P | Q61180 | DE | Epithelial Na <sup>+</sup> channel subunit alpha;                                             |
| P | Q61180 | DE | Nonvoltage-gated sodium channel 1 subunit alpha;                                              |
| P | Q61180 | DR | ligand-gated sodium channel activity                                                          |
| P | Q61327 | CC | Terminates the action of dopamine by its high affinity sodium-dependent                       |
|   |        |    | reuptake into presynaptic terminals (By similarity).                                          |
| P | Q61327 | CC | Terminates the action of dopamine by its high affinity sodium-dependent                       |
|   |        |    | reuptake into presynaptic terminals (By similarity).                                          |
| P | Q61327 | DE | Sodium-dependent dopamine transporter;                                                        |
| P | Q61327 | DE | Sodium-dependent dopamine transporter;                                                        |
|   |        |    | Sodium-phosphate symporter which plays a fundamental housekeeping role in                     |
| P | Q61609 | CC | phosphate transport, such as absorbing phosphate from interstitial fluid for                  |
|   |        |    | normal cellular functions such as cellular metabolism, signal transduction, and               |
|   |        |    | nucleic acid and lipid synthesis                                                              |
| P | Q61609 | DE | Phosphate transporter 1;                                                                      |
| P | Q61609 | DE | Sodium-dependent phosphate transporter 1;                                                     |
| P | Q61609 | DR | inorganic phosphate transmembrane transporter activity                                        |
| P | Q61743 | CC | Inward rectifier potassium channels are characterized by a greater tendency to                |
|   |        |    | allow potassium to flow into the cell rather than out of it                                   |
| P | Q61743 | CC | Their voltage dependence is regulated by the concentration of extracellular                   |
|   |        |    | potassium; as external potassium is raised, the voltage range of the channel                  |
|   |        |    | opening shifts to more positive voltages                                                      |
| P | Q61743 | DE | ATP-sensitive inward rectifier potassium channel 11;                                          |
| P | Q61743 | DE | Inward rectifier K <sup>+</sup> channel Kir6.2;                                               |
| P | Q61743 | DE | Potassium channel, inwardly rectifying subfamily J member 11;                                 |
| P | Q61743 | DR | ATP-activated inward rectifier potassium channel activity                                     |
|   |        |    | Assuming opened or closed conformations in response to the voltage difference                 |
| P | Q61923 | CC | across the membrane, the protein forms a potassium-selective channel through                  |
|   |        |    | which potassium ions may pass in accordance with their electrochemical                        |
|   |        |    | gradient                                                                                      |
| P | Q61923 | CC | mediates the voltage-dependent potassium ion permeability of excitable                        |
|   |        |    | membranes                                                                                     |
| P | Q61923 | DE | Potassium voltage-gated channel subfamily A member 6;                                         |
| P | Q61923 | DE | Voltage-gated potassium channel subunit Kv1.6;                                                |
| P | Q61923 | DR | voltage-gated potassium channel activity                                                      |
| P | Q61983 | CC | Important for the resorption of phosphate by the kidney                                       |
| P | Q61983 | CC | May be involved in actively transporting phosphate into cells via Na <sup>+</sup> cotransport |
|   |        |    | in the renal brush border membrane.                                                           |
| P | Q61983 | CC | May be involved in actively transporting phosphate into cells via Na <sup>+</sup> cotransport |
|   |        |    | in the renal brush border membrane.                                                           |
| P | Q61983 | DE | Na <sup>+</sup> /PI cotransporter 1;                                                          |
| P | Q61983 | DE | Renal Na <sup>+</sup> -dependent phosphate cotransporter 1;                                   |
| P | Q61983 | DE | Renal Na <sup>+</sup> -dependent phosphate cotransporter 1;                                   |
| P | Q61983 | DE | Renal sodium-dependent phosphate transport protein 1;                                         |
| P | Q61983 | DE | Renal sodium-dependent phosphate transport protein 1;                                         |
| P | Q61983 | DE | Renal sodium-phosphate transport protein 1;                                                   |
| P | Q61983 | DE | Sodium-dependent phosphate transport protein 1;                                               |
| P | Q61983 | DE | Sodium-dependent phosphate transport protein 1;                                               |
| P | Q61983 | DE | Sodium/phosphate cotransporter 1;                                                             |
| P | Q61983 | DE | Sodium/phosphate cotransporter 1;                                                             |
| P | Q61983 | DR | phosphate transmembrane transporter activity                                                  |
| P | Q62052 | CC | Could be involved in the transport of tyrosine, the precursor to melanin synthesis,           |
|   |        |    | within the melanocyte                                                                         |
| P | Q62273 | CC | Sulfate transporter                                                                           |
| P | Q62273 | DE | Sulfate transporter;                                                                          |
| P | Q62273 | DR | secondary active sulfate transmembrane transporter activity                                   |
| P | Q62674 | CC | Exhibits the transport characteristics of the nucleoside transport system cit or N2           |
|   |        |    | subtype (N2/cit) (selective for pyrimidine nucleosides and adenosine)                         |
| P | Q62674 | CC | Sodium-dependent and pyrimidine-selective                                                     |
| P | Q62674 | DE | Concentrative nucleoside transporter 1;                                                       |
| P | Q62674 | DE | Na <sup>+</sup> /nucleoside cotransporter 1;                                                  |
| P | Q62674 | DE | Na <sup>+</sup> /nucleoside cotransporter 1;                                                  |
| P | Q62674 | DE | Sodium-coupled nucleoside transporter 1;                                                      |
| P | Q62674 | DE | Sodium-coupled nucleoside transporter 1;                                                      |
| P | Q62674 | DE | Sodium/nucleoside cotransporter 1;                                                            |
| P | Q62674 | DE | Sodium/nucleoside cotransporter 1;                                                            |



|   |        |    |                                                                                                                                                                                                            |
|---|--------|----|------------------------------------------------------------------------------------------------------------------------------------------------------------------------------------------------------------|
| P | Q62674 | DR | pyrimidine- and adenine-specific:sodium symporter activity                                                                                                                                                 |
| P | Q62720 | CC | May be involved in zinc transport out of the cell.                                                                                                                                                         |
| P | Q62720 | DE | Zinc transporter 1;                                                                                                                                                                                        |
| P | Q62720 | DR | zinc ion transmembrane transporter activity                                                                                                                                                                |
| P | Q62773 | CC | Exhibits the transport characteristics of the nucleoside transport system cif or N1 subtype (N1/cif) (selective for purine nucleosides and uridine)                                                        |
| P | Q62773 | CC | Sodium-dependent and purine-selective                                                                                                                                                                      |
| P | Q62773 | DE | Concentrative nucleoside transporter 2;                                                                                                                                                                    |
| P | Q62773 | DE | Na <sup>+</sup> /nucleoside cotransporter 2;                                                                                                                                                               |
| P | Q62773 | DE | Na <sup>+</sup> /nucleoside cotransporter 2;                                                                                                                                                               |
| P | Q62773 | DE | Sodium-coupled nucleoside transporter 2;                                                                                                                                                                   |
| P | Q62773 | DE | Sodium-coupled nucleoside transporter 2;                                                                                                                                                                   |
| P | Q62773 | DE | Sodium/nucleoside cotransporter 2;                                                                                                                                                                         |
| P | Q62773 | DE | Sodium/nucleoside cotransporter 2;                                                                                                                                                                         |
| P | Q62773 | DE | Sodium/purine nucleoside cotransporter;                                                                                                                                                                    |
| P | Q62773 | DR | nucleoside:sodium symporter activity                                                                                                                                                                       |
| P | Q62773 | DR | nucleoside:sodium symporter activity                                                                                                                                                                       |
| P | Q62941 | CC | Involved in accumulation of zinc in endosomal/lysosomal vesicles.                                                                                                                                          |
| P | Q62941 | DE | Zinc transporter 2;                                                                                                                                                                                        |
| P | Q62941 | DR | zinc ion transmembrane transporter activity                                                                                                                                                                |
| P | Q62A98 | CC | Part of the ABC transporter complex HmuTUV involved in hemin import                                                                                                                                        |
| P | Q62A98 | DE | Hemin import ATP-binding protein HmuV;                                                                                                                                                                     |
| P | Q62AW4 | CC | Part of the ABC transporter complex TauABC involved in taurine import                                                                                                                                      |
| P | Q62AW4 | DE | Taurine import ATP-binding protein TauB;                                                                                                                                                                   |
| P | Q62AW4 | DR | taurine-transporting ATPase activity                                                                                                                                                                       |
| P | Q62B84 | CC | Part of the ABC transporter complex MetNIQ involved in methionine import                                                                                                                                   |
| P | Q62B84 | DE | Methionine import ATP-binding protein MetN 2;                                                                                                                                                              |
| P | Q62GB4 | DR | glycerol-3-phosphate-transporting ATPase activity                                                                                                                                                          |
| P | Q62GY9 | DR | L-arabinose-importing ATPase activity                                                                                                                                                                      |
| P | Q62H59 | DR | phosphonate transmembrane-transporting ATPase activity                                                                                                                                                     |
| P | Q62IJ6 | CC | One of the components of the high-affinity ATP-driven potassium transport (or KDP) system, which catalyzes the hydrolysis of ATP coupled with the exchange of hydrogen and potassium ions (By similarity). |
| P | Q62IJ6 | DE | Potassium-binding and translocating subunit A;                                                                                                                                                             |
| P | Q62IJ6 | DE | Potassium-translocating ATPase A chain;                                                                                                                                                                    |
| P | Q62IJ6 | DE | Potassium-transporting ATPase A chain;                                                                                                                                                                     |
| P | Q62IJ6 | DR | potassium-transporting ATPase activity                                                                                                                                                                     |
| P | Q62IJ8 | CC | One of the components of the high-affinity ATP-driven potassium transport (or KDP) system, which catalyzes the hydrolysis of ATP coupled with the exchange of hydrogen and potassium ions                  |
| P | Q62IJ8 | DE | Potassium-binding and translocating subunit C;                                                                                                                                                             |
| P | Q62IJ8 | DE | Potassium-translocating ATPase C chain;                                                                                                                                                                    |
| P | Q62IJ8 | DE | Potassium-transporting ATPase C chain;                                                                                                                                                                     |
| P | Q62IJ8 | DR | potassium-transporting ATPase activity                                                                                                                                                                     |
| P | Q62J04 | DE | Lipoprotein-releasing system ATP-binding protein LolD;                                                                                                                                                     |
| P | Q62J04 | DR | lipoprotein transporter activity                                                                                                                                                                           |
| P | Q62JX8 | CC | Transport of potassium into the cell (By similarity).                                                                                                                                                      |
| P | Q62JX8 | DE | Probable potassium transport system protein kup;                                                                                                                                                           |
| P | Q62JX8 | DR | potassium ion transmembrane transporter activity                                                                                                                                                           |
| P | Q62K82 | CC | Part of the ABC transporter complex CysAW 1F involved in sulfate/thiosulfate import                                                                                                                        |
| P | Q62K82 | DE | Sulfate-transporting ATPase;                                                                                                                                                                               |
| P | Q62K82 | DE | Sulfate/thiosulfate import ATP-binding protein CysA;                                                                                                                                                       |
| P | Q62K82 | DR | sulfate transmembrane-transporting ATPase activity                                                                                                                                                         |
| P | Q62K91 | CC | Part of the ABC transporter complex RbsABCD involved in ribose import                                                                                                                                      |
| P | Q62K91 | DE | Ribose import ATP-binding protein RbsA;                                                                                                                                                                    |
| P | Q62L74 | CC | Part of the ABC transporter complex PstSACB involved in phosphate import                                                                                                                                   |
| P | Q62L74 | DE | ABC phosphate transporter;                                                                                                                                                                                 |
| P | Q62L74 | DE | Phosphate import ATP-binding protein PstB;                                                                                                                                                                 |
| P | Q62L74 | DE | Phosphate-transporting ATPase;                                                                                                                                                                             |
| P | Q62L74 | DR | inorganic phosphate transmembrane transporter activity                                                                                                                                                     |
| P | Q62L74 | DR | phosphate transmembrane-transporting ATPase activity                                                                                                                                                       |
| P | Q62M41 | CC | Part of the ABC transporter complex MetNIQ involved in methionine import                                                                                                                                   |
| P | Q62M41 | DE | Methionine import ATP-binding protein MetN 1;                                                                                                                                                              |
| P | Q63JZ3 | CC | Part of the ABC transporter complex TauABC involved in taurine import                                                                                                                                      |
| P | Q63JZ3 | DE | Taurine import ATP-binding protein TauB;                                                                                                                                                                   |

|   |        |    |                                                                                                                                                                                                            |
|---|--------|----|------------------------------------------------------------------------------------------------------------------------------------------------------------------------------------------------------------|
| P | Q63JZ3 | DR | taurine-transporting ATPase activity                                                                                                                                                                       |
| P | Q63NI4 | CC | Part of the ABC transporter complex MetNIQ involved in methionine import                                                                                                                                   |
| P | Q63NI4 | DE | Methionine import ATP-binding protein MetN 2;                                                                                                                                                              |
| P | Q63NR0 | CC | Part of the ABC transporter complex HmuTUV involved in hemin import                                                                                                                                        |
| P | Q63NR0 | DE | Hemin import ATP-binding protein HmuV;                                                                                                                                                                     |
| P | Q63P06 | CC | Part of the ABC transporter complex RbsABCD involved in ribose import                                                                                                                                      |
| P | Q63P06 | DE | Ribose import ATP-binding protein RbsA;                                                                                                                                                                    |
| P | Q63Q62 | DR | glycerol-3-phosphate-transporting ATPase activity                                                                                                                                                          |
| P | Q63QQ7 | DR | L-arabinose-importing ATPase activity                                                                                                                                                                      |
| P | Q63R24 | DR | phosphonate transmembrane-transporting ATPase activity                                                                                                                                                     |
| P | Q63S19 | CC | Part of the ABC transporter complex MetNIQ involved in methionine import                                                                                                                                   |
| P | Q63S19 | DE | Methionine import ATP-binding protein MetN 1;                                                                                                                                                              |
| P | Q63SP4 | DE | Lipoprotein-releasing system ATP-binding protein LolD;                                                                                                                                                     |
| P | Q63SP4 | DR | lipoprotein transporter activity                                                                                                                                                                           |
| P | Q63TY1 | CC | part of the ABC transporter complex CysAW 1F involved in sulfate/sulfonate import                                                                                                                          |
| P | Q63TY1 | DE | Sulfate-transporting ATPase;                                                                                                                                                                               |
| P | Q63TY1 | DE | Sulfate/thiosulfate import ATP-binding protein CysA;                                                                                                                                                       |
| P | Q63TY1 | DR | sulfate transmembrane-transporting ATPase activity                                                                                                                                                         |
| P | Q63US0 | CC | Transport of potassium into the cell (By similarity).                                                                                                                                                      |
| P | Q63US0 | DE | Probable potassium transport system protein kup;                                                                                                                                                           |
| P | Q63US0 | DR | potassium ion transmembrane transporter activity                                                                                                                                                           |
| P | Q63V79 | CC | Part of the ABC transporter complex PstSACB involved in phosphate import                                                                                                                                   |
| P | Q63V79 | DE | ABC phosphate transporter;                                                                                                                                                                                 |
| P | Q63V79 | DE | Phosphate import ATP-binding protein PstB;                                                                                                                                                                 |
| P | Q63V79 | DE | Phosphate-transporting ATPase;                                                                                                                                                                             |
| P | Q63V79 | DR | inorganic phosphate transmembrane transporter activity                                                                                                                                                     |
| P | Q63V79 | DR | phosphate transmembrane-transporting ATPase activity                                                                                                                                                       |
| P | Q63VS1 | CC | One of the components of the high-affinity ATP-driven potassium transport (or KDP) system, which catalyzes the hydrolysis of ATP coupled with the exchange of hydrogen and potassium ions                  |
| P | Q63VS1 | DE | Potassium-binding and translocating subunit C;                                                                                                                                                             |
| P | Q63VS1 | DE | Potassium-translocating ATPase C chain;                                                                                                                                                                    |
| P | Q63VS1 | DE | Potassium-transporting ATPase C chain;                                                                                                                                                                     |
| P | Q63VS1 | DR | potassium-transporting ATPase activity                                                                                                                                                                     |
| P | Q63VS3 | CC | One of the components of the high-affinity ATP-driven potassium transport (or KDP) system, which catalyzes the hydrolysis of ATP coupled with the exchange of hydrogen and potassium ions (By similarity). |
| P | Q63VS3 | DE | Potassium-binding and translocating subunit A;                                                                                                                                                             |
| P | Q63VS3 | DE | Potassium-translocating ATPase A chain;                                                                                                                                                                    |
| P | Q63VS3 | DE | Potassium-transporting ATPase A chain;                                                                                                                                                                     |
| P | Q63VS3 | DR | potassium-transporting ATPase activity                                                                                                                                                                     |
| P | Q64347 | CC | Chloride channels have several functions including the regulation of cell volume; membrane potential stabilization, signal transduction and transepithelial transport                                      |
| P | Q64347 | CC | Voltage-gated chloride channel                                                                                                                                                                             |
| P | Q64347 | DE | Chloride channel protein 1;                                                                                                                                                                                |
| P | Q64347 | DE | Chloride channel protein, skeletal muscle;                                                                                                                                                                 |
| P | Q64347 | DR | voltage-gated chloride channel activity                                                                                                                                                                    |
| P | Q64518 | CC | Contributes to calcium sequestration involved in muscular excitation/contraction.                                                                                                                          |
| P | Q64518 | CC | This magnesium-dependent enzyme catalyzes the hydrolysis of ATP coupled with the transport of the calcium                                                                                                  |
| P | Q64518 | CC | Transports calcium ions from the cytosol into the sarcoplasmic/endoplasmic reticulum lumen                                                                                                                 |
| P | Q64518 | DE | Calcium pump 3;                                                                                                                                                                                            |
| P | Q64518 | DE | SR Ca <sup>2+</sup> -ATPase 3;                                                                                                                                                                             |
| P | Q64518 | DE | Sarcoplasmic/endoplasmic reticulum calcium ATPase 3;                                                                                                                                                       |
| P | Q64518 | DR | calcium-transporting ATPase activity                                                                                                                                                                       |
| P | Q64SM5 | CC | Part of the ABC transporter complex PstSACB involved in phosphate import                                                                                                                                   |
| P | Q64SM5 | DE | ABC phosphate transporter;                                                                                                                                                                                 |
| P | Q64SM5 | DE | Phosphate import ATP-binding protein PstB;                                                                                                                                                                 |
| P | Q64SM5 | DE | Phosphate-transporting ATPase;                                                                                                                                                                             |
| P | Q64SM5 | DR | inorganic phosphate transmembrane transporter activity                                                                                                                                                     |
| P | Q64SM5 | DR | phosphate transmembrane-transporting ATPase activity                                                                                                                                                       |
| P | Q64SQ6 | CC | Part of the ABC transporter complex PotABCD involved in spermidine/putrescine import                                                                                                                       |
| P | Q64SQ6 | CC | Part of the ABC transporter complex PotABCD involved in spermidine/putrescine import                                                                                                                       |
| P | Q64SQ6 | DE | Spermidine/putrescine import ATP-binding protein PotA;                                                                                                                                                     |

|   |        |    |                                                                                                                                                                                                            |
|---|--------|----|------------------------------------------------------------------------------------------------------------------------------------------------------------------------------------------------------------|
| P | Q64SQ6 | DE | Spermidine/putrescine import ATP-binding protein PotA;                                                                                                                                                     |
| P | Q64T76 | CC | Na <sup>+</sup> /H <sup>+</sup> antiporter that extrudes sodium in exchange for external protons (By similarity).                                                                                          |
| P | Q64T76 | DE | Na <sup>+</sup> /H <sup>+</sup> antiporter nhaA;                                                                                                                                                           |
| P | Q64T76 | DE | Sodium/proton antiporter nhaA;                                                                                                                                                                             |
| P | Q64YU7 | CC | One of the components of the high-affinity ATP-driven potassium transport (or KDP) system, which catalyzes the hydrolysis of ATP coupled with the exchange of hydrogen and potassium ions                  |
| P | Q64YU7 | DE | Potassium-binding and translocating subunit C;                                                                                                                                                             |
| P | Q64YU7 | DE | Potassium-translocating ATPase C chain;                                                                                                                                                                    |
| P | Q64YU7 | DE | Potassium-transporting ATPase C chain;                                                                                                                                                                     |
| P | Q64YU7 | DR | potassium-transporting ATPase activity                                                                                                                                                                     |
| P | Q64YU9 | CC | One of the components of the high-affinity ATP-driven potassium transport (or KDP) system, which catalyzes the hydrolysis of ATP coupled with the exchange of hydrogen and potassium ions (By similarity). |
| P | Q64YU9 | DE | Potassium-binding and translocating subunit A;                                                                                                                                                             |
| P | Q64YU9 | DE | Potassium-translocating ATPase A chain;                                                                                                                                                                    |
| P | Q64YU9 | DE | Potassium-transporting ATPase A chain;                                                                                                                                                                     |
| P | Q64YU9 | DR | potassium-transporting ATPase activity                                                                                                                                                                     |
| P | Q64Z80 | DE | Lipoprotein-releasing system ATP-binding protein LolD;                                                                                                                                                     |
| P | Q64Z80 | DR | lipoprotein transporter activity                                                                                                                                                                           |
| P | Q651D5 | CC | Aquaporins facilitate the transport of water and small neutral solutes across cell membranes (By similarity).                                                                                              |
| P | Q652J4 | CC | High-affinity potassium transporter (By similarity).                                                                                                                                                       |
| P | Q652J4 | DE | Probable potassium transporter 13;                                                                                                                                                                         |
| P | Q652J4 | DR | potassium ion transmembrane transporter activity                                                                                                                                                           |
| P | Q652N5 | DE | Phosphate transporter 4;4;                                                                                                                                                                                 |
| P | Q653B6 | CC | High-affinity potassium transporter (By similarity).                                                                                                                                                       |
| P | Q653B6 | DE | Potassium transporter 18;                                                                                                                                                                                  |
| P | Q653B6 | DR | potassium ion transmembrane transporter activity                                                                                                                                                           |
| P | Q65E55 | CC | Part of the ABC transporter complex RbsABCD involved in ribose import                                                                                                                                      |
| P | Q65E55 | DE | Ribose import ATP-binding protein RbsA;                                                                                                                                                                    |
| P | Q65HB9 | CC | Part of the ABC transporter complex PstSACB involved in phosphate import                                                                                                                                   |
| P | Q65HB9 | DE | ABC phosphate transporter 2;                                                                                                                                                                               |
| P | Q65HB9 | DE | Phosphate import ATP-binding protein PstB 2;                                                                                                                                                               |
| P | Q65HB9 | DE | Phosphate-transporting ATPase 2;                                                                                                                                                                           |
| P | Q65HB9 | DR | inorganic phosphate transmembrane transporter activity                                                                                                                                                     |
| P | Q65HB9 | DR | phosphate transmembrane-transporting ATPase activity                                                                                                                                                       |
| P | Q65HC0 | CC | Part of the ABC transporter complex PstSACB involved in phosphate import                                                                                                                                   |
| P | Q65HC0 | DE | ABC phosphate transporter 1;                                                                                                                                                                               |
| P | Q65HC0 | DE | Phosphate import ATP-binding protein PstB 1;                                                                                                                                                               |
| P | Q65HC0 | DE | Phosphate-transporting ATPase 1;                                                                                                                                                                           |
| P | Q65HC0 | DR | inorganic phosphate transmembrane transporter activity                                                                                                                                                     |
| P | Q65HC0 | DR | phosphate transmembrane-transporting ATPase activity                                                                                                                                                       |
| P | Q65M31 | DR | sodium:dicarboxylate symporter activity                                                                                                                                                                    |
| P | Q65M34 | CC | Part of the ABC transporter complex MetNIQ involved in methionine import                                                                                                                                   |
| P | Q65M34 | DE | Methionine import ATP-binding protein MetN 1;                                                                                                                                                              |
| P | Q65Q27 | CC | Uptake of L-rhamnose across the boundary membrane with the concomitant transport of protons into the cell (symport system) (By similarity).                                                                |
| P | Q65Q27 | DE | L-rhamnose-H <sup>+</sup> transport protein;                                                                                                                                                               |
| P | Q65Q27 | DE | L-rhamnose-proton symporter;                                                                                                                                                                               |
| P | Q65QT6 | CC | Part of the ABC transporter complex MalEFGK involved in maltose/maltodextrin import                                                                                                                        |
| P | Q65QT6 | CC | Part of the ABC transporter complex MalEFGK involved in maltose/maltodextrin import                                                                                                                        |
| P | Q65QT6 | DE | Maltose/maltodextrin import ATP-binding protein MalK;                                                                                                                                                      |
| P | Q65QT6 | DE | Maltose/maltodextrin import ATP-binding protein MalK;                                                                                                                                                      |
| P | Q65QT6 | DR | maltose-transporting ATPase activity                                                                                                                                                                       |
| P | Q65RK2 | CC | Na <sup>+</sup> /H <sup>+</sup> antiporter that extrudes sodium in exchange for external protons (By similarity).                                                                                          |
| P | Q65RK2 | DE | Na <sup>+</sup> /H <sup>+</sup> antiporter nhaA;                                                                                                                                                           |
| P | Q65RK2 | DE | Sodium/proton antiporter nhaA;                                                                                                                                                                             |
| P | Q65S74 | CC | The physiological role may be the reduction of the intracellular concentration of toxic sugars or sugar metabolites (By similarity).                                                                       |
| P | Q65S74 | DE | Probable sugar efflux transporter;                                                                                                                                                                         |
| P | Q65SC9 | CC | Part of the ABC transporter complex ThiBPQ involved in thiamine import                                                                                                                                     |
| P | Q65SC9 | DE | Thiamine import ATP-binding protein ThiQ;                                                                                                                                                                  |
| P | Q65SW3 | CC | Part of the ABC transporter complex ModABC involved in molybdenum import                                                                                                                                   |
| P | Q65SW3 | DE | Molybdenum import ATP-binding protein ModC;                                                                                                                                                                |

|   |        |    |                                                                                                                                                                                         |
|---|--------|----|-----------------------------------------------------------------------------------------------------------------------------------------------------------------------------------------|
| P | Q65SW3 | DR | molybdenum ion transmembrane transporter activity                                                                                                                                       |
| P | Q65T42 | CC | part of the ABC transporter complex CysAW involved in sulfate/thiosulfate import                                                                                                        |
| P | Q65T42 | DE | Sulfate-transporting ATPase;                                                                                                                                                            |
| P | Q65T42 | DE | Sulfate/thiosulfate import ATP-binding protein CysA;                                                                                                                                    |
| P | Q65T42 | DR | sulfate transmembrane-transporting ATPase activity                                                                                                                                      |
| P | Q65TB7 | DE | Lipoprotein-releasing system ATP-binding protein LolD;                                                                                                                                  |
| P | Q65TB7 | DR | lipoprotein transporter activity                                                                                                                                                        |
| P | Q65UC1 | CC | Involved in the import of serine and threonine into the cell, with the concomitant import of sodium (symport system) (By similarity).                                                   |
| P | Q65UC1 | DE | Na <sup>+</sup> /serine-threonine symporter;                                                                                                                                            |
| P | Q65UC1 | DR | sodium:dicarboxylate symporter activity                                                                                                                                                 |
| P | Q65UC1 | DR | sodium:dicarboxylate symporter activity                                                                                                                                                 |
| P | Q65UE1 | CC | part of the ABC transporter complex PotABCD involved in spermidine/putrescine import                                                                                                    |
| P | Q65UE1 | CC | part of the ABC transporter complex PotABCD involved in spermidine/putrescine import                                                                                                    |
| P | Q65UE1 | DE | Spermidine/putrescine import ATP-binding protein PotA;                                                                                                                                  |
| P | Q65UE1 | DE | Spermidine/putrescine import ATP-binding protein PotA;                                                                                                                                  |
| P | Q65UG3 | CC | Part of the ABC transporter complex ZnuABC involved in zinc import                                                                                                                      |
| P | Q65UG3 | DE | Zinc import ATP-binding protein ZnuC;                                                                                                                                                   |
| P | Q65UG3 | DR | zinc transporting ATPase activity                                                                                                                                                       |
| P | Q65UW1 | CC | Part of the ABC transporter complex MglABC involved in galactose/methyl galactoside import                                                                                              |
| P | Q65UW1 | DE | Galactose/methyl galactoside import ATP-binding protein MglA;                                                                                                                           |
| P | Q65V02 | CC | Part of the ABC transporter complex CcmAB involved in the biogenesis of c-type cytochromes; once thought to export heme, this seems not to be the case, but its exact role is uncertain |
| P | Q65V02 | DE | Heme exporter protein A;                                                                                                                                                                |
| P | Q65V02 | DR | heme-transporting ATPase activity                                                                                                                                                       |
| P | Q65VG9 | CC | Part of the ABC transporter complex MetNIQ involved in methionine import                                                                                                                |
| P | Q65VG9 | DE | Methionine import ATP-binding protein MetN;                                                                                                                                             |
| P | Q65VG9 | DR | D-methionine transmembrane transporter activity                                                                                                                                         |
| P | Q65VH3 | CC | Na <sup>+</sup> /H <sup>+</sup> antiporter that excludes sodium in exchange for external protons (By similarity)                                                                        |
| P | Q65VH3 | DE | Na <sup>+</sup> /H <sup>+</sup> antiporter nhaB;                                                                                                                                        |
| P | Q65VH3 | DE | Sodium/proton antiporter nhaB;                                                                                                                                                          |
| P | Q65VH3 | DR | sodium:hydrogen antiporter activity                                                                                                                                                     |
| P | Q65VT3 | CC | Mediates influx of magnesium ions (By similarity).                                                                                                                                      |
| P | Q65VT3 | DE | Magnesium transport protein CorA;                                                                                                                                                       |
| P | Q65VT3 | DR | cobalt ion transmembrane transporter activity                                                                                                                                           |
| P | Q65VT3 | DR | magnesium ion transmembrane transporter activity                                                                                                                                        |
| P | Q65WJ1 | DR | L-arabinose-importing ATPase activity                                                                                                                                                   |
| P | Q660M8 | CC | part of the ABC transporter complex PotABCD involved in spermidine/putrescine import                                                                                                    |
| P | Q660M8 | CC | part of the ABC transporter complex PotABCD involved in spermidine/putrescine import                                                                                                    |
| P | Q660M8 | DE | Spermidine/putrescine import ATP-binding protein PotA;                                                                                                                                  |
| P | Q660M8 | DE | Spermidine/putrescine import ATP-binding protein PotA;                                                                                                                                  |
| P | Q662E6 | CC | Part of the ABC transporter complex PstSACB involved in phosphate import                                                                                                                |
| P | Q662E6 | DE | ABC phosphate transporter;                                                                                                                                                              |
| P | Q662E6 | DE | Phosphate import ATP-binding protein PstB;                                                                                                                                              |
| P | Q662E6 | DE | Phosphate-transporting ATPase;                                                                                                                                                          |
| P | Q662E6 | DR | inorganic phosphate transmembrane transporter activity                                                                                                                                  |
| P | Q662E6 | DR | phosphate transmembrane-transporting ATPase activity                                                                                                                                    |
| P | Q663R5 | CC | Part of the ABC transporter complex PstSACB involved in phosphate import                                                                                                                |
| P | Q663R5 | DE | ABC phosphate transporter 2;                                                                                                                                                            |
| P | Q663R5 | DE | Phosphate import ATP-binding protein PstB 2;                                                                                                                                            |
| P | Q663R5 | DE | Phosphate-transporting ATPase 2;                                                                                                                                                        |
| P | Q663R5 | DR | inorganic phosphate transmembrane transporter activity                                                                                                                                  |
| P | Q663R5 | DR | phosphate transmembrane-transporting ATPase activity                                                                                                                                    |
| P | Q663Y5 | CC | Part of the ABC transporter complex XylFGH involved in xylose import                                                                                                                    |
| P | Q663Y5 | DE | Xylose import ATP-binding protein XylG;                                                                                                                                                 |
| P | Q664P8 | CC | Part of the ABC transporter complex TauABC involved in taurine import                                                                                                                   |
| P | Q664P8 | DE | Taurine import ATP-binding protein TauB;                                                                                                                                                |
| P | Q664P8 | DR | taurine-transporting ATPase activity                                                                                                                                                    |
| P | Q664Q5 | CC | Transport system that facilitates potassium-efflux, possibly by potassium-proton antiport (By similarity).                                                                              |
| P | Q664Q5 | DE | Glutathione-regulated potassium-efflux system protein kefB;                                                                                                                             |
| P | Q664Q5 | DE | K <sup>+</sup> /H <sup>+</sup> antiporter;                                                                                                                                              |
| P | Q664Q5 | DE | NEM-activable K <sup>+</sup> /H <sup>+</sup> antiporter;                                                                                                                                |

|   |        |    |                                                                                                                                                                                                            |
|---|--------|----|------------------------------------------------------------------------------------------------------------------------------------------------------------------------------------------------------------|
| P | Q664Q5 | DR | glutathione-regulated potassium exporter activity                                                                                                                                                          |
| P | Q664X5 | CC | Part of the ABC transporter complex MalEQR involved in maltose/maltodextrin import                                                                                                                         |
| P | Q664X5 | CC | Part of the ABC transporter complex MalEQR involved in maltose/maltodextrin import                                                                                                                         |
| P | Q664X5 | DE | Maltose/maltodextrin import ATP-binding protein MalK;                                                                                                                                                      |
| P | Q664X5 | DE | Maltose/maltodextrin import ATP-binding protein MalK;                                                                                                                                                      |
| P | Q664X5 | DR | maltose-transporting ATPase activity                                                                                                                                                                       |
| P | Q665P2 | CC | Involved in the import of serine and threonine into the cell, with the concomitant import of sodium (symport system) (By similarity).                                                                      |
| P | Q665P2 | DE | Na <sup>+</sup> /serine-threonine symporter;                                                                                                                                                               |
| P | Q665P2 | DR | sodium:dicarboxylate symporter activity                                                                                                                                                                    |
| P | Q665P2 | DR | sodium:dicarboxylate symporter activity                                                                                                                                                                    |
| P | Q666Q4 | CC | Important to control the intracellular level of arginine and the correct balance between arginine and lysine (By similarity).                                                                              |
| P | Q667L9 | CC | Part of the ABC transporter complex MetNIQ involved in methionine import                                                                                                                                   |
| P | Q667L9 | DE | Methionine import ATP-binding protein MetN 2;                                                                                                                                                              |
| P | Q667L9 | DR | D-methionine transmembrane transporter activity                                                                                                                                                            |
| P | Q667S4 | CC | One of the components of the high-affinity ATP-driven potassium transport (or KDP) system, which catalyzes the hydrolysis of ATP coupled with the exchange of hydrogen and potassium ions (By similarity). |
| P | Q667S4 | DE | Potassium-binding and translocating subunit B;                                                                                                                                                             |
| P | Q667S4 | DE | Potassium-translocating ATPase B chain;                                                                                                                                                                    |
| P | Q667S4 | DE | Potassium-transporting ATPase B chain;                                                                                                                                                                     |
| P | Q667S4 | DR | potassium-transporting ATPase activity                                                                                                                                                                     |
| P | Q667S5 | CC | One of the components of the high-affinity ATP-driven potassium transport (or KDP) system, which catalyzes the hydrolysis of ATP coupled with the exchange of hydrogen and potassium ions (By similarity). |
| P | Q667S5 | DE | Potassium-binding and translocating subunit A;                                                                                                                                                             |
| P | Q667S5 | DE | Potassium-translocating ATPase A chain;                                                                                                                                                                    |
| P | Q667S5 | DE | Potassium-transporting ATPase A chain;                                                                                                                                                                     |
| P | Q667S5 | DR | potassium-transporting ATPase activity                                                                                                                                                                     |
| P | Q668E1 | CC | Part of the ABC transporter complex PstSACB involved in phosphate import                                                                                                                                   |
| P | Q668E1 | DE | ABC phosphate transporter 1;                                                                                                                                                                               |
| P | Q668E1 | DE | Phosphate import ATP-binding protein PstB 1;                                                                                                                                                               |
| P | Q668E1 | DE | Phosphate-transporting ATPase 1;                                                                                                                                                                           |
| P | Q668E1 | DR | inorganic phosphate transmembrane transporter activity                                                                                                                                                     |
| P | Q668E1 | DR | phosphate transmembrane-transporting ATPase activity                                                                                                                                                       |
| P | Q668K6 | CC | Part of the ABC transporter complex CysA W 1F involved in sulfate/thiosulfate import                                                                                                                       |
| P | Q668K6 | DE | Sulfate-transporting ATPase;                                                                                                                                                                               |
| P | Q668K6 | DE | Sulfate/thiosulfate import ATP-binding protein CysA;                                                                                                                                                       |
| P | Q668K6 | DR | sulfate transmembrane-transporting ATPase activity                                                                                                                                                         |
| P | Q668N2 | CC | H <sup>+</sup> -stimulated, highly selective, manganese uptake system (By similarity).                                                                                                                     |
| P | Q668N2 | DE | Probable manganese transport protein mntH;                                                                                                                                                                 |
| P | Q668T8 | CC | Part of the ABC transporter complex CcmAB involved in the biogenesis of c-type cytochromes; once thought to export heme, this seems not to be the case, but its exact role is uncertain                    |
| P | Q668T8 | DE | Heme exporter protein A;                                                                                                                                                                                   |
| P | Q668T8 | DR | heme-transporting ATPase activity                                                                                                                                                                          |
| P | Q669P3 | DE | Lipoprotein-releasing system ATP-binding protein LolD;                                                                                                                                                     |
| P | Q669P3 | DR | lipoprotein transporter activity                                                                                                                                                                           |
| P | Q669Z9 | CC | Part of the ABC transporter complex BtuCDF involved in vitamin B12 import                                                                                                                                  |
| P | Q669Z9 | DE | Vitamin B12 import system permease protein BtuC;                                                                                                                                                           |
| P | Q66A01 | CC | Part of the ABC transporter complex BtuCDF involved in vitamin B12 import                                                                                                                                  |
| P | Q66A01 | DE | Vitamin B12 import ATP-binding protein BtuD;                                                                                                                                                               |
| P | Q66A01 | DE | Vitamin B12-transporting ATPase;                                                                                                                                                                           |
| P | Q66AQ9 | CC | Na <sup>+</sup> /H <sup>+</sup> antiporter that excludes sodium in exchange for external protons (By similarity)                                                                                           |
| P | Q66AQ9 | DE | Na <sup>+</sup> /H <sup>+</sup> antiporter nhaB;                                                                                                                                                           |
| P | Q66AQ9 | DE | Sodium/proton antiporter nhaB;                                                                                                                                                                             |
| P | Q66AQ9 | DR | sodium:hydrogen antiporter activity                                                                                                                                                                        |
| P | Q66C83 | CC | Part of the ABC transporter complex MglABC involved in galactose/methyl galactoside import                                                                                                                 |
| P | Q66C83 | DE | Galactose/methyl galactoside import ATP-binding protein MglA;                                                                                                                                              |
| P | Q66CQ3 | CC | Part of the ABC transporter complex MetNIQ involved in methionine import                                                                                                                                   |
| P | Q66CQ3 | DE | Methionine import ATP-binding protein MetN 1;                                                                                                                                                              |
| P | Q66D26 | DR | phosphonate transmembrane-transporting ATPase activity                                                                                                                                                     |
| P | Q66D71 | CC | Part of the ABC transporter complex ModABC involved in molybdenum import                                                                                                                                   |

|   |        |    |                                                                                                                                                                                                                                               |
|---|--------|----|-----------------------------------------------------------------------------------------------------------------------------------------------------------------------------------------------------------------------------------------------|
| P | Q66D71 | DE | Molybdenum import ATP-binding protein ModC;                                                                                                                                                                                                   |
| P | Q66D71 | DR | molybdenum ion transmembrane transporter activity                                                                                                                                                                                             |
| P | Q66D85 | CC | Involved in zinc efflux across the cytoplasmic membrane, thus reducing zinc accumulation in the cytoplasm and rendering bacteria more resistant to zinc. It may contribute to zinc homeostasis at low concentrations of zinc. (By similarity) |
| P | Q66D85 | CC | Zinc transporter zitB;                                                                                                                                                                                                                        |
| P | Q66D85 | DE | Binds vitamin B12 and delivers it to the periplasmic surface of BtuC. (By similarity)                                                                                                                                                         |
| P | Q66EE7 | CC | Part of the ABC transporter complex BtuCDF involved in vitamin B12 import                                                                                                                                                                     |
| P | Q66EE7 | CC | Na <sup>+</sup> /H <sup>+</sup> antiporter that extrudes sodium in exchange for external protons. (By similarity)                                                                                                                             |
| P | Q66ES8 | CC | Na <sup>+</sup> /H <sup>+</sup> antiporter nhaA;                                                                                                                                                                                              |
| P | Q66ES8 | DE | Sodium/proton antiporter nhaA;                                                                                                                                                                                                                |
| P | Q66FF0 | CC | Uptake of L-rhamnose across the boundary membrane with the concomitant transport of protons into the cell (symport system) (By similarity).                                                                                                   |
| P | Q66FF0 | DE | L-rhamnose-H <sup>+</sup> transport protein;                                                                                                                                                                                                  |
| P | Q66FF0 | DE | L-rhamnose-proton symporter;                                                                                                                                                                                                                  |
| P | Q66FK0 | CC | Part of the ABC transporter complex HmuTUV involved in hemin import                                                                                                                                                                           |
| P | Q66FK0 | DE | Hemin import ATP-binding protein HmuV;                                                                                                                                                                                                        |
| P | Q66FU4 | DR | glycerol-3-phosphate-transporting ATPase activity                                                                                                                                                                                             |
| P | Q66FY7 | CC | Mediates influx of magnesium ions (By similarity).                                                                                                                                                                                            |
| P | Q66FY7 | DE | Magnesium transport protein CorA;                                                                                                                                                                                                             |
| P | Q66FY7 | DR | cobalt ion transmembrane transporter activity                                                                                                                                                                                                 |
| P | Q66FY7 | DR | magnesium ion transmembrane transporter activity                                                                                                                                                                                              |
| P | Q66GH5 | CC | Responsible for the low-affinity transport of potassium into the cell, with the probable concomitant uptake of protons (symport system) (By similarity).                                                                                      |
| P | Q66GH5 | DE | Kup system potassium uptake protein;                                                                                                                                                                                                          |
| P | Q66GH5 | DE | Low affinity potassium transport system protein kup;                                                                                                                                                                                          |
| P | Q66GH5 | DR | potassium ion transmembrane transporter activity                                                                                                                                                                                              |
| P | Q67BT3 | CC | High-affinity sodium/citrate cotransporter that mediates citrate entry into cells                                                                                                                                                             |
| P | Q67BT3 | CC | High-affinity sodium/citrate cotransporter that mediates citrate entry into cells                                                                                                                                                             |
| P | Q67BT3 | CC | May facilitate the utilization of circulating citrate for the generation of metabolic energy and for the synthesis of fatty acids and cholesterol (By similarity).                                                                            |
| P | Q67BT3 | CC | The transport process is electrogenic; it is the trivalent form of citrate rather than the divalent form that is recognized as a substrate                                                                                                    |
| P | Q67BT3 | DE | Na <sup>+</sup> /citrate cotransporter;                                                                                                                                                                                                       |
| P | Q67BT3 | DE | Na <sup>+</sup> /citrate cotransporter;                                                                                                                                                                                                       |
| P | Q67BT3 | DE | Sodium-coupled citrate transporter;                                                                                                                                                                                                           |
| P | Q67BT3 | DE | Sodium-coupled citrate transporter;                                                                                                                                                                                                           |
| P | Q67BT3 | DE | Sodium-dependent citrate transporter;                                                                                                                                                                                                         |
| P | Q67BT3 | DE | Sodium-dependent citrate transporter;                                                                                                                                                                                                         |
| P | Q67BT3 | DR | citrate transmembrane transporter activity                                                                                                                                                                                                    |
| P | Q67RE7 | CC | Part of the ABC transporter complex PstSACB involved in phosphate import                                                                                                                                                                      |
| P | Q67RE7 | DE | ABC phosphate transporter 2;                                                                                                                                                                                                                  |
| P | Q67RE7 | DE | Phosphate import ATP-binding protein PstB 2;                                                                                                                                                                                                  |
| P | Q67RE7 | DE | Phosphate-transporting ATPase 2;                                                                                                                                                                                                              |
| P | Q67RE7 | DR | inorganic phosphate transmembrane transporter activity                                                                                                                                                                                        |
| P | Q67RE7 | DR | phosphate transmembrane-transporting ATPase activity                                                                                                                                                                                          |
| P | Q67RG2 | CC | Part of the ABC transporter complex PstSACB involved in phosphate import                                                                                                                                                                      |
| P | Q67RG2 | DE | ABC phosphate transporter 1;                                                                                                                                                                                                                  |
| P | Q67RG2 | DE | Phosphate import ATP-binding protein PstB 1;                                                                                                                                                                                                  |
| P | Q67RG2 | DE | Phosphate-transporting ATPase 1;                                                                                                                                                                                                              |
| P | Q67RG2 | DR | inorganic phosphate transmembrane transporter activity                                                                                                                                                                                        |
| P | Q67RG2 | DR | phosphate transmembrane-transporting ATPase activity                                                                                                                                                                                          |
| P | Q67SV5 | CC | Part of the ABC transporter complex MetNIQ involved in methionine import                                                                                                                                                                      |
| P | Q67SV5 | DE | Methionine import ATP-binding protein MetN;                                                                                                                                                                                                   |
| P | Q67UC7 | CC | High-affinity potassium transporter (By similarity).                                                                                                                                                                                          |
| P | Q67UC7 | DE | Probable potassium transporter 17;                                                                                                                                                                                                            |
| P | Q67UC7 | DR | potassium ion transmembrane transporter activity                                                                                                                                                                                              |
| P | Q67UQ7 | CC | Magnesium transporter that may mediate the influx of magnesium. (By similarity)                                                                                                                                                               |
| P | Q67UQ7 | DE | Magnesium transporter MRS2-B;                                                                                                                                                                                                                 |
| P | Q67VS5 | CC | High-affinity potassium transporter.                                                                                                                                                                                                          |
| P | Q67VS5 | DE | Potassium transporter 10;                                                                                                                                                                                                                     |
| P | Q67VS5 | DR | potassium ion transmembrane transporter activity                                                                                                                                                                                              |
| P | Q67WJ8 | CC | Aquaporins facilitate the transport of water and small neutral solutes across cell membranes (By similarity).                                                                                                                                 |
| P | Q67YF8 | CC | Does not seem to transport sucrose.                                                                                                                                                                                                           |

|   |        |    |                                                                                                                                                                                                            |
|---|--------|----|------------------------------------------------------------------------------------------------------------------------------------------------------------------------------------------------------------|
| P | Q67YF8 | DE | Sucrose permease 7;                                                                                                                                                                                        |
| P | Q67YF8 | DE | Sucrose transport protein SUC7;                                                                                                                                                                            |
| P | Q67YF8 | DE | Sucrose-proton symporter 7;                                                                                                                                                                                |
| P | Q67YF8 | DR | sucrose transmembrane transporter activity                                                                                                                                                                 |
| P | Q68KI4 | CC | Involved in vacuolar ion compartmentalization necessary for cell volume regulation and cytoplasmic Na <sup>+</sup> detoxification                                                                          |
| P | Q68KI4 | DE | Na <sup>+</sup> /H <sup>+</sup> exchanger 1;                                                                                                                                                               |
| P | Q68KI4 | DE | Sodium/hydrogen exchanger 1;                                                                                                                                                                               |
| P | Q68KI4 | DR | sodium:hydrogen antiporter activity                                                                                                                                                                        |
| P | Q695T7 | CC | Uptake of leucine is sodium- dependent                                                                                                                                                                     |
| P | Q695T7 | DE | Sodium-dependent neutral amino acid transporter B(0)AT1;                                                                                                                                                   |
| P | Q695T7 | DR | neurotransmitter:sodium symporter activity                                                                                                                                                                 |
| P | Q69L87 | CC | High-affinity potassium transporter (By similarity).                                                                                                                                                       |
| P | Q69L87 | DE | Potassium transporter 22;                                                                                                                                                                                  |
| P | Q69L87 | DR | potassium ion transmembrane transporter activity                                                                                                                                                           |
| P | Q69RI8 | CC | High-affinity potassium transporter (By similarity).                                                                                                                                                       |
| P | Q69RI8 | DE | Probable potassium transporter 14;                                                                                                                                                                         |
| P | Q69RI8 | DR | potassium ion transmembrane transporter activity                                                                                                                                                           |
| P | Q69T94 | CC | High-affinity transporter for external inorganic phosphate (By similarity).                                                                                                                                |
| P | Q69T94 | DE | Probable inorganic phosphate transporter 1-10;                                                                                                                                                             |
| P | Q6A329 | CC | Does not seem to transport sucrose.                                                                                                                                                                        |
| P | Q6A329 | DE | Putative sucrose transport protein SUC6;                                                                                                                                                                   |
| P | Q6A329 | DE | Sucrose permease 6;                                                                                                                                                                                        |
| P | Q6A329 | DE | Sucrose-proton symporter 6;                                                                                                                                                                                |
| P | Q6A329 | DR | sucrose transmembrane transporter activity                                                                                                                                                                 |
| P | Q6A5S0 | CC | Transport of potassium into the cell (By similarity).                                                                                                                                                      |
| P | Q6A5S0 | DE | Probable potassium transport system protein kup;                                                                                                                                                           |
| P | Q6A5S0 | DR | potassium ion transmembrane transporter activity                                                                                                                                                           |
| P | Q6A6X6 | CC | Part of the ABC transporter complex MetNIQ involved in methionine import                                                                                                                                   |
| P | Q6A6X6 | DE | Methionine import ATP-binding protein MetN;                                                                                                                                                                |
| P | Q6AAX3 | CC | Part of the ABC transporter complex PstSACB involved in phosphate import                                                                                                                                   |
| P | Q6AAX3 | DE | ABC phosphate transporter;                                                                                                                                                                                 |
| P | Q6AAX3 | DE | Phosphate import ATP-binding protein PstB;                                                                                                                                                                 |
| P | Q6AAX3 | DE | Phosphate-transporting ATPase;                                                                                                                                                                             |
| P | Q6AAX3 | DR | inorganic phosphate transmembrane transporter activity                                                                                                                                                     |
| P | Q6AAX3 | DR | phosphate transmembrane-transporting ATPase activity                                                                                                                                                       |
| P | Q6AB77 | CC | Na <sup>+</sup> /H <sup>+</sup> antiporter that excludes sodium in exchange for external protons (By similarity).                                                                                          |
| P | Q6AB77 | DE | Na <sup>+</sup> /H <sup>+</sup> antiporter nhaA;                                                                                                                                                           |
| P | Q6AB77 | DE | Sodium/proton antiporter nhaA;                                                                                                                                                                             |
| P | Q6ABJ2 | CC | One of the components of the high-affinity ATP-driven potassium transport (or KDP) system, which catalyzes the hydrolysis of ATP coupled with the exchange of hydrogen and potassium ions (By similarity). |
| P | Q6ABJ2 | DE | Potassium-binding and translocating subunit A;                                                                                                                                                             |
| P | Q6ABJ2 | DE | Potassium-translocating ATPase A chain;                                                                                                                                                                    |
| P | Q6ABJ2 | DE | Potassium-transporting ATPase A chain;                                                                                                                                                                     |
| P | Q6ABJ2 | DR | potassium-transporting ATPase activity                                                                                                                                                                     |
| P | Q6ADG4 | CC | Part of the ABC transporter complex PstSACB involved in phosphate import                                                                                                                                   |
| P | Q6ADG4 | DE | ABC phosphate transporter;                                                                                                                                                                                 |
| P | Q6ADG4 | DE | Phosphate import ATP-binding protein PstB;                                                                                                                                                                 |
| P | Q6ADG4 | DE | Phosphate-transporting ATPase;                                                                                                                                                                             |
| P | Q6ADG4 | DR | inorganic phosphate transmembrane transporter activity                                                                                                                                                     |
| P | Q6ADG4 | DR | phosphate transmembrane-transporting ATPase activity                                                                                                                                                       |
| P | Q6AE21 | CC | Part of the ABC transporter complex MetNIQ involved in methionine import                                                                                                                                   |
| P | Q6AE21 | DE | Methionine import ATP-binding protein MetN;                                                                                                                                                                |
| P | Q6AI14 | CC | In apical cell membrane may be involved in mediating sodium absorption                                                                                                                                     |
| P | Q6AI14 | CC | major proton extruding system driven by the inward sodium ion chemical gradient                                                                                                                            |
| P | Q6AI14 | DE | Na <sup>+</sup> /H <sup>+</sup> exchanger 4;                                                                                                                                                               |
| P | Q6AI14 | DE | Sodium/hydrogen exchanger 4;                                                                                                                                                                               |
| P | Q6AI14 | DR | sodium:hydrogen antiporter activity                                                                                                                                                                        |
| P | Q6AM16 | CC | Part of the ABC transporter complex PstSACB involved in phosphate import                                                                                                                                   |
| P | Q6AM16 | DE | ABC phosphate transporter;                                                                                                                                                                                 |
| P | Q6AM16 | DE | Phosphate import ATP-binding protein PstB;                                                                                                                                                                 |
| P | Q6AM16 | DE | Phosphate-transporting ATPase;                                                                                                                                                                             |
| P | Q6AM16 | DR | inorganic phosphate transmembrane transporter activity                                                                                                                                                     |
| P | Q6AM16 | DR | phosphate transmembrane-transporting ATPase activity                                                                                                                                                       |

|   |        |    |                                                                                                                                       |
|---|--------|----|---------------------------------------------------------------------------------------------------------------------------------------|
| P | Q6AMR9 | DE | Lipoprotein-releasing system ATP-binding protein LolD;                                                                                |
| P | Q6AMR9 | DR | lipoprotein transporter activity                                                                                                      |
| P | Q6AQH5 | CC | Na <sup>+</sup> /H <sup>+</sup> antiporter that extrudes sodium in exchange for external protons (By similarity)                      |
| P | Q6AQH5 | DE | Na <sup>+</sup> /H <sup>+</sup> antiporter nhaA;                                                                                      |
| P | Q6AQH5 | DE | Sodium/proton antiporter nhaA;                                                                                                        |
| P | Q6AS08 | CC | Involved in the import of serine and threonine into the cell, with the concomitant import of sodium (symport system) (By similarity). |
| P | Q6AS08 | DE | Na <sup>+</sup> /serine-threonine symporter;                                                                                          |
| P | Q6AS08 | DR | sodium:dicarboxylate symporter activity                                                                                               |
| P | Q6AS08 | DR | sodium:dicarboxylate symporter activity                                                                                               |
| P | Q6B014 | DE | K2P10.1 potassium channel isoform 3;                                                                                                  |
| P | Q6B014 | DE | Potassium channel, subfamily K, member 10, isoform 3;                                                                                 |
| P | Q6B014 | DE | Potassium channel, subfamily K, member 10, isoform CRA_a;                                                                             |
| P | Q6B014 | DR | potassium channel activity                                                                                                            |
| P | Q6CYN3 | CC | Part of the ABC transporter complex PstSACB involved in phosphate import                                                              |
| P | Q6CYN3 | DE | ABC phosphate transporter 2;                                                                                                          |
| P | Q6CYN3 | DE | Phosphate import ATP-binding protein PstB 2;                                                                                          |
| P | Q6CYN3 | DE | Phosphate-transporting ATPase 2;                                                                                                      |
| P | Q6CYN3 | DR | inorganic phosphate transmembrane transporter activity                                                                                |
| P | Q6CYN3 | DR | phosphate transmembrane-transporting ATPase activity                                                                                  |
| P | Q6CZ34 | DR | glycerol-3-phosphate-transporting ATPase activity                                                                                     |
| P | Q6CZ44 | CC | The physiological role may be the reduction of the intracellular concentration of toxic sugars or sugar metabolites (By similarity).  |
| P | Q6CZ44 | DE | Probable sugar efflux transporter;                                                                                                    |
| P | Q6CZH4 | CC | Mediates influx of magnesium ions (By similarity).                                                                                    |
| P | Q6CZH4 | DE | Magnesium transport protein CorA;                                                                                                     |
| P | Q6CZH4 | DR | cobalt ion transmembrane transporter activity                                                                                         |
| P | Q6CZH4 | DR | magnesium ion transmembrane transporter activity                                                                                      |
| P | Q6CZU5 | CC | Transport system that facilitates potassium-efflux, possibly by potassium-proton antiport (By similarity).                            |
| P | Q6CZU5 | DE | Glutathione-regulated potassium-efflux system protein kefB;                                                                           |
| P | Q6CZU5 | DE | K <sup>+</sup> /H <sup>+</sup> antiporter;                                                                                            |
| P | Q6CZU5 | DE | NEM-activable K <sup>+</sup> /H <sup>+</sup> antiporter;                                                                              |
| P | Q6CZU5 | DR | glutathione-regulated potassium exporter activity                                                                                     |
| P | Q6D090 | CC | Important to control the intracellular level of arginine and the correct balance between arginine and lysine (By similarity).         |
| P | Q6D0B9 | CC | Na <sup>+</sup> /H <sup>+</sup> antiporter that extrudes sodium in exchange for external protons (By similarity)                      |
| P | Q6D0B9 | DE | Na <sup>+</sup> /H <sup>+</sup> antiporter nhaA;                                                                                      |
| P | Q6D0B9 | DE | Sodium/proton antiporter nhaA;                                                                                                        |
| P | Q6D0F3 | CC | Part of the ABC transporter complex ThiBPQ involved in thiamine import                                                                |
| P | Q6D0F3 | DE | Thiamine import ATP-binding protein ThiQ;                                                                                             |
| P | Q6D1C4 | CC | Part of the ABC transporter complex MetNIQ involved in methionine import                                                              |
| P | Q6D1C4 | DE | Methionine import ATP-binding protein MetN 3;                                                                                         |
| P | Q6D1C4 | DR | D-methionine transmembrane transporter activity                                                                                       |
| P | Q6D1Z3 | CC | Binds vitamin B12 and delivers it to the periplasmic surface of BtuC (By similarity)                                                  |
| P | Q6D1Z3 | CC | Part of the ABC transporter complex BtuCDF involved in vitamin B12 import                                                             |
| P | Q6D201 | CC | Part of the ABC transporter complex CysAW 1F involved in sulfate/inosulfate import                                                    |
| P | Q6D201 | DE | Sulfate-transporting ATPase;                                                                                                          |
| P | Q6D201 | DE | Sulfate/thiosulfate import ATP-binding protein CysA;                                                                                  |
| P | Q6D201 | DR | sulfate transmembrane-transporting ATPase activity                                                                                    |
| P | Q6D2D5 | CC | Part of the ABC transporter complex PstSACB involved in phosphate import                                                              |
| P | Q6D2D5 | DE | ABC phosphate transporter 1;                                                                                                          |
| P | Q6D2D5 | DE | Phosphate import ATP-binding protein PstB 1;                                                                                          |
| P | Q6D2D5 | DE | Phosphate-transporting ATPase 1;                                                                                                      |
| P | Q6D2D5 | DR | inorganic phosphate transmembrane transporter activity                                                                                |
| P | Q6D2D5 | DR | phosphate transmembrane-transporting ATPase activity                                                                                  |
| P | Q6D3Q6 | CC | Part of the ABC transporter complex MetNIQ involved in methionine import                                                              |
| P | Q6D3Q6 | DE | Methionine import ATP-binding protein MetN 2;                                                                                         |
| P | Q6D4A8 | CC | Part of the ABC transporter complex ZnuABC involved in zinc import                                                                    |
| P | Q6D4A8 | DE | Zinc import ATP-binding protein ZnuC;                                                                                                 |
| P | Q6D4A8 | DR | zinc transporting ATPase activity                                                                                                     |
| P | Q6D4E2 | CC | Part of the ABC transporter complex F0A6CD involved in spermidine/putrescine import                                                   |
| P | Q6D4E2 | CC | Part of the ABC transporter complex F0A6CD involved in spermidine/putrescine import                                                   |
| P | Q6D4E2 | DE | Spermidine/putrescine import ATP-binding protein PotA;                                                                                |
| P | Q6D4E2 | DE | Spermidine/putrescine import ATP-binding protein PotA;                                                                                |



|   |        |    |                                                                                                                                                                                                                                               |
|---|--------|----|-----------------------------------------------------------------------------------------------------------------------------------------------------------------------------------------------------------------------------------------------|
| P | Q6D4M9 | CC | Na <sup>+</sup> /H <sup>+</sup> antiporter that extrudes sodium in exchange for external protons (By similarity)                                                                                                                              |
| P | Q6D4M9 | DE | Na <sup>+</sup> /H <sup>+</sup> antiporter nhaB;                                                                                                                                                                                              |
| P | Q6D4M9 | DE | Sodium/proton antiporter nhaB;                                                                                                                                                                                                                |
| P | Q6D4M9 | DR | sodium:hydrogen antiporter activity                                                                                                                                                                                                           |
| P | Q6D4W8 | DR | L-arabinose-importing ATPase activity                                                                                                                                                                                                         |
| P | Q6D5H7 | CC | Part of the ABC transporter complex MetNIQ involved in methionine import                                                                                                                                                                      |
| P | Q6D5H7 | DE | Methionine import ATP-binding protein MetN 1;                                                                                                                                                                                                 |
| P | Q6D606 | CC | Part of the ABC transporter complex CcmAB involved in the biogenesis of c-type cytochromes; once thought to export heme, this seems not to be the case, but its exact role is uncertain                                                       |
| P | Q6D606 | DE | Heme exporter protein A;                                                                                                                                                                                                                      |
| P | Q6D606 | DR | heme-transporting ATPase activity                                                                                                                                                                                                             |
| P | Q6D645 | CC | Part of the ABC transporter complex HmuTUV involved in hemin import                                                                                                                                                                           |
| P | Q6D645 | DE | Hemin import ATP-binding protein HmuV;                                                                                                                                                                                                        |
| P | Q6D654 | CC | Part of the ABC transporter complex BtuCDF involved in vitamin B12 import                                                                                                                                                                     |
| P | Q6D654 | DE | Vitamin B12 import ATP-binding protein BtuD;                                                                                                                                                                                                  |
| P | Q6D654 | DE | Vitamin B12-transporting ATPase;                                                                                                                                                                                                              |
| P | Q6D656 | CC | Part of the ABC transporter complex BtuCDF involved in vitamin B12 import                                                                                                                                                                     |
| P | Q6D656 | DE | Vitamin B12 import system permease protein BtuC;                                                                                                                                                                                              |
| P | Q6D664 | DE | Lipoprotein-releasing system ATP-binding protein LolD;                                                                                                                                                                                        |
| P | Q6D664 | DR | lipoprotein transporter activity                                                                                                                                                                                                              |
| P | Q6D7D0 | CC | Part of the ABC transporter complex ModABC involved in molybdenum import                                                                                                                                                                      |
| P | Q6D7D0 | DE | Molybdenum import ATP-binding protein ModC;                                                                                                                                                                                                   |
| P | Q6D7D0 | DR | molybdenum ion transmembrane transporter activity                                                                                                                                                                                             |
| P | Q6D7E5 | CC | Involved in zinc efflux across the cytoplasmic membrane, thus reducing zinc accumulation in the cytoplasm and rendering bacteria more resistant to zinc (it may contribute to zinc homeostasis at low concentrations of zinc (By similarity)) |
| P | Q6D7E5 | CC |                                                                                                                                                                                                                                               |
| P | Q6D7E5 | DE | Zinc transporter zitB;                                                                                                                                                                                                                        |
| P | Q6D7I3 | CC | One of the components of the high-affinity ATP-driven potassium transport (or KDP) system, which catalyzes the hydrolysis of ATP coupled with the exchange of hydrogen and potassium ions (By similarity).                                    |
| P | Q6D7I3 | DE | Potassium-binding and translocating subunit A;                                                                                                                                                                                                |
| P | Q6D7I3 | DE | Potassium-translocating ATPase A chain;                                                                                                                                                                                                       |
| P | Q6D7I3 | DE | Potassium-transporting ATPase A chain;                                                                                                                                                                                                        |
| P | Q6D7I3 | DR | potassium-transporting ATPase activity                                                                                                                                                                                                        |
| P | Q6D7I5 | CC | One of the components of the high-affinity ATP-driven potassium transport (or KDP) system, which catalyzes the hydrolysis of ATP coupled with the exchange of hydrogen and potassium ions                                                     |
| P | Q6D7I5 | DE | Potassium-binding and translocating subunit C;                                                                                                                                                                                                |
| P | Q6D7I5 | DE | Potassium-translocating ATPase C chain;                                                                                                                                                                                                       |
| P | Q6D7I5 | DE | Potassium-transporting ATPase C chain;                                                                                                                                                                                                        |
| P | Q6D7I5 | DR | potassium-transporting ATPase activity                                                                                                                                                                                                        |
| P | Q6D9G4 | CC | Involved in the import of serine and threonine into the cell, with the concomitant import of sodium (symport system) (By similarity).                                                                                                         |
| P | Q6D9G4 | DE | Na <sup>+</sup> /serine-threonine symporter;                                                                                                                                                                                                  |
| P | Q6D9G4 | DR | sodium:dicarboxylate symporter activity                                                                                                                                                                                                       |
| P | Q6D9G4 | DR | sodium:dicarboxylate symporter activity                                                                                                                                                                                                       |
| P | Q6DA13 | CC | Uptake of L-rhamnose across the boundary membrane with the concomitant transport of protons into the cell (symport system) (By similarity).                                                                                                   |
| P | Q6DA13 | DE | L-rhamnose-H <sup>+</sup> transport protein;                                                                                                                                                                                                  |
| P | Q6DA13 | DE | L-rhamnose-proton symporter;                                                                                                                                                                                                                  |
| P | Q6DB03 | CC | Part of the ABC transporter complex XylFGH involved in xylose import                                                                                                                                                                          |
| P | Q6DB03 | DE | Xylose import ATP-binding protein XylG;                                                                                                                                                                                                       |
| P | Q6DB03 | DR | D-xylose-importing ATPase activity                                                                                                                                                                                                            |
| P | Q6DB87 | CC | Part of the ABC transporter complex RbsABCD involved in ribose import                                                                                                                                                                         |
| P | Q6DB87 | DE | Ribose import ATP-binding protein RbsA;                                                                                                                                                                                                       |
| P | Q6DB92 | CC | Responsible for the low-affinity transport of potassium into the cell, with the probable concomitant uptake of protons (symport system) (By similarity).                                                                                      |
| P | Q6DB92 | DE | Kup system potassium uptake protein;                                                                                                                                                                                                          |
| P | Q6DB92 | DE | Low affinity potassium transport system protein kup;                                                                                                                                                                                          |
| P | Q6DB92 | DR | potassium ion transmembrane transporter activity                                                                                                                                                                                              |
| P | Q6DBM8 | CC | Involved in sequestration of excess zinc in the cytoplasm into vacuoles to maintain zinc homeostasis (By similarity).                                                                                                                         |
| P | Q6EU94 | CC | may function as water channel to facilitate the transport of water across cell membrane                                                                                                                                                       |
| P | Q6EU94 | DE | Water channel protein RWC1;                                                                                                                                                                                                                   |

|   |        |    |                                                                                                      |
|---|--------|----|------------------------------------------------------------------------------------------------------|
| P | Q6F0P3 | DR | phosphonate transmembrane-transporting ATPase activity                                               |
| P | Q6F0V4 | CC | Part of the ABC transporter complex PotABCD involved in                                              |
| P | Q6F0V4 | CC | Part of the ABC transporter complex PotABCD involved in                                              |
| P | Q6F0V4 | DE | Spermidine/putrescine import                                                                         |
| P | Q6F0V4 | DE | Spermidine/putrescine import ATP-binding protein PotA;                                               |
| P | Q6F1N1 | CC | Part of the ABC transporter complex PstSACB involved in phosphate import                             |
| P | Q6F1N1 | DE | ABC phosphate transporter;                                                                           |
| P | Q6F1N1 | DE | Phosphate import ATP-binding protein PstB;                                                           |
| P | Q6F1N1 | DE | Phosphate-transporting ATPase;                                                                       |
| P | Q6F1N1 | DR | inorganic phosphate transmembrane transporter activity                                               |
| P | Q6F1N1 | DR | phosphate transmembrane-transporting ATPase activity                                                 |
| P | Q6F793 | CC | Transport of potassium into the cell (By similarity).                                                |
| P | Q6F793 | DE | Probable potassium transport system protein kup;                                                     |
| P | Q6F793 | DR | potassium ion transmembrane transporter activity                                                     |
| P | Q6F9A8 | CC | Part of the ABC transporter complex CysAW 1F involved in sulfate/sulfonate                           |
| P | Q6F9A8 | DE | import                                                                                               |
| P | Q6F9A8 | DE | Sulfate-transporting ATPase;                                                                         |
| P | Q6F9A8 | DE | Sulfate/thiosulfate import ATP-binding protein CysA;                                                 |
| P | Q6F9A8 | DR | sulfate transmembrane-transporting ATPase activity                                                   |
| P | Q6F9P2 | CC | Part of the ABC transporter complex MetNIQ involved in methionine import                             |
| P | Q6F9P2 | DE | Methionine import ATP-binding protein MetN 2;                                                        |
| P | Q6FAN3 | CC | Part of the ABC transporter complex MetNIQ involved in methionine import                             |
| P | Q6FAN3 | DE | Methionine import ATP-binding protein MetN 1;                                                        |
| P | Q6FB65 | CC | Involved in the import of serine and threonine into the cell, with the concomitant                   |
|   |        |    | import of sodium (symport system) (By similarity).                                                   |
| P | Q6FB65 | DE | Na <sup>+</sup> /serine-threonine symporter;                                                         |
| P | Q6FB65 | DR | sodium:dicarboxylate symporter activity                                                              |
| P | Q6FB65 | DR | sodium:dicarboxylate symporter activity                                                              |
| P | Q6FCW7 | CC | Part of the ABC transporter complex PstSACB involved in phosphate import                             |
| P | Q6FCW7 | DE | ABC phosphate transporter;                                                                           |
| P | Q6FCW7 | DE | Phosphate import ATP-binding protein PstB;                                                           |
| P | Q6FCW7 | DE | Phosphate-transporting ATPase;                                                                       |
| P | Q6FCW7 | DR | inorganic phosphate transmembrane transporter activity                                               |
| P | Q6FCW7 | DR | phosphate transmembrane-transporting ATPase activity                                                 |
| P | Q6FFL0 | CC | Part of the ABC transporter complex ZnuABC involved in zinc import                                   |
| P | Q6FFL0 | DE | Zinc import ATP-binding protein ZnuC;                                                                |
| P | Q6FFL0 | DR | zinc transporting ATPase activity                                                                    |
| P | Q6FIH7 | DE | ATP synthase, H <sup>+</sup> transporting, mitochondrial F0 complex, subunit C1 (Subunit             |
|   |        |    | 9), isoform CRA_a;                                                                                   |
| P | Q6FIH7 | DE | cDNA, FLJ92113, Homo sapiens ATP synthase, H <sup>+</sup> transporting, mitochondrial                |
|   |        |    | F0complex, subunit c (subunit 9), isoform 1 (ATP5G1), mRNA;                                          |
| P | Q6FZX3 | DE | Lipoprotein-releasing system ATP-binding protein LolD;                                               |
| P | Q6FZX3 | DR | lipoprotein transporter activity                                                                     |
| P | Q6G098 | CC | Part of the ABC transporter complex HmuTUV involved in hemin import                                  |
| P | Q6G098 | DE | Hemin import ATP-binding protein HmuV;                                                               |
| P | Q6G0H9 | CC | Na <sup>+</sup> /H <sup>+</sup> antiporter that excludes sodium in exchange for external protons (by |
|   |        |    | similarity)                                                                                          |
| P | Q6G0H9 | DE | Na <sup>+</sup> /H <sup>+</sup> antiporter nhaA;                                                     |
| P | Q6G0H9 | DE | Sodium/proton antiporter nhaA;                                                                       |
| P | Q6G0L7 | CC | Part of the ABC transporter complex PstSACB involved in phosphate import                             |
| P | Q6G0L7 | DE | ABC phosphate transporter;                                                                           |
| P | Q6G0L7 | DE | Phosphate import ATP-binding protein PstB;                                                           |
| P | Q6G0L7 | DE | Phosphate-transporting ATPase;                                                                       |
| P | Q6G0L7 | DR | inorganic phosphate transmembrane transporter activity                                               |
| P | Q6G0L7 | DR | phosphate transmembrane-transporting ATPase activity                                                 |
| P | Q6G0V9 | CC | Part of the ABC transporter complex CcmAB involved in the biogenesis of c-                           |
|   |        |    | type cytochromes; once thought to export heme, this seems not to be the case, but                    |
|   |        |    | its exact role is uncertain                                                                          |
| P | Q6G0V9 | DE | Heme exporter protein A;                                                                             |
| P | Q6G0V9 | DR | heme-transporting ATPase activity                                                                    |
| P | Q6G194 | DR | glycerol-3-phosphate-transporting ATPase activity                                                    |
| P | Q6G2E2 | CC | Part of the ABC transporter complex MetNIQ involved in methionine import                             |
| P | Q6G2E2 | DE | Methionine import ATP-binding protein MetN;                                                          |
| P | Q6G3A6 | DE | Lipoprotein-releasing system ATP-binding protein LolD;                                               |
| P | Q6G3A6 | DR | lipoprotein transporter activity                                                                     |
| P | Q6G475 | CC | Part of the ABC transporter complex HmuTUV involved in hemin import                                  |
| P | Q6G475 | DE | Hemin import ATP-binding protein HmuV;                                                               |

|   |        |    |                                                                                                                                                                                                             |
|---|--------|----|-------------------------------------------------------------------------------------------------------------------------------------------------------------------------------------------------------------|
| P | Q6G4T6 | CC | Part of the ABC transporter complex PstSACB involved in phosphate import                                                                                                                                    |
| P | Q6G4T6 | DE | ABC phosphate transporter;                                                                                                                                                                                  |
| P | Q6G4T6 | DE | Phosphate import ATP-binding protein PstB;                                                                                                                                                                  |
| P | Q6G4T6 | DE | Phosphate-transporting ATPase;                                                                                                                                                                              |
| P | Q6G4T6 | DR | inorganic phosphate transmembrane transporter activity                                                                                                                                                      |
| P | Q6G4T6 | DR | phosphate transmembrane-transporting ATPase activity                                                                                                                                                        |
| P | Q6G529 | CC | Part of the ABC transporter complex CcmAB involved in the biogenesis of c-type cytochromes; once thought to export heme, this seems not to be the case, but its exact role is uncertain                     |
| P | Q6G529 | DE | Heme exporter protein A;                                                                                                                                                                                    |
| P | Q6G529 | DR | heme-transporting ATPase activity                                                                                                                                                                           |
| P | Q6G5J0 | DR | glycerol-3-phosphate-transporting ATPase activity                                                                                                                                                           |
| P | Q6G5K1 | CC | Na <sup>+</sup> /H <sup>+</sup> antiporter that excludes sodium in exchange for external protons (By similarity)                                                                                            |
| P | Q6G5K1 | DE | Na <sup>+</sup> /H <sup>+</sup> antiporter nhaA;                                                                                                                                                            |
| P | Q6G5K1 | DE | Sodium/proton antiporter nhaA;                                                                                                                                                                              |
| P | Q6GQS1 | CC | May act as a ATP-Mg/Pi exchanger that mediates the transport of Mg-ATP in exchange for phosphate, catalyzing the net uptake or efflux of adenine nucleotides into or from the mitochondria (By similarity). |
| P | Q6H3Z3 | CC | Involved in Fe(3+) uptake from the rhizosphere and phloem transport of iron                                                                                                                                 |
| P | Q6H3Z3 | CC | Plays a important role in iron homeostasis during the early stages of growth                                                                                                                                |
| P | Q6H3Z3 | DE | Iron-phytosiderophore transporter YSL15;                                                                                                                                                                    |
| P | Q6H3Z6 | CC | Involved in the phloem transport of iron and manganese and their translocation into the grain                                                                                                               |
| P | Q6H3Z6 | CC | Transports iron- and manganese-micronanamine chelates, but not iron-phytosiderophores                                                                                                                       |
| P | Q6H4L9 | CC | High-affinity potassium transporter (By similarity).                                                                                                                                                        |
| P | Q6H4L9 | DE | Potassium transporter 20;                                                                                                                                                                                   |
| P | Q6H4L9 | DR | potassium ion transmembrane transporter activity                                                                                                                                                            |
| P | Q6H4M2 | CC | High-affinity potassium transporter (By similarity).                                                                                                                                                        |
| P | Q6H4M2 | DE | Potassium transporter 19;                                                                                                                                                                                   |
| P | Q6H4M2 | DR | potassium ion transmembrane transporter activity                                                                                                                                                            |
| P | Q6H4R6 | CC | High-affinity potassium transporter (By similarity).                                                                                                                                                        |
| P | Q6H4R6 | DE | Potassium transporter 23;                                                                                                                                                                                   |
| P | Q6H4R6 | DR | potassium ion transmembrane transporter activity                                                                                                                                                            |
| P | Q6HBS0 | CC | Part of the ABC transporter complex MetNIQ involved in methionine import                                                                                                                                    |
| P | Q6HBS0 | DE | Methionine import ATP-binding protein MetN 2;                                                                                                                                                               |
| P | Q6HDP8 | CC | Part of the ABC transporter complex PstSACB involved in phosphate import                                                                                                                                    |
| P | Q6HDP8 | DE | ABC phosphate transporter;                                                                                                                                                                                  |
| P | Q6HDP8 | DE | Phosphate import ATP-binding protein PstB;                                                                                                                                                                  |
| P | Q6HDP8 | DE | Phosphate-transporting ATPase;                                                                                                                                                                              |
| P | Q6HDP8 | DR | inorganic phosphate transmembrane transporter activity                                                                                                                                                      |
| P | Q6HDP8 | DR | phosphate transmembrane-transporting ATPase activity                                                                                                                                                        |
| P | Q6HFB5 | DR | phosphonate transmembrane-transporting ATPase activity                                                                                                                                                      |
| P | Q6HLQ9 | CC | Part of the ABC transporter complex POTABCD involved in spermidine/putrescine import                                                                                                                        |
| P | Q6HLQ9 | CC | Part of the ABC transporter complex POTABCD involved in spermidine/putrescine import                                                                                                                        |
| P | Q6HLQ9 | DE | Spermidine/putrescine import ATP-binding protein PotA;                                                                                                                                                      |
| P | Q6HLQ9 | DE | Spermidine/putrescine import ATP-binding protein PotA;                                                                                                                                                      |
| P | Q6HN77 | CC | One of the components of the high-affinity ATP-driven potassium transport (or KDP) system, which catalyzes the hydrolysis of ATP coupled with the exchange of hydrogen and potassium ions                   |
| P | Q6HN77 | DE | Potassium-binding and translocating subunit C;                                                                                                                                                              |
| P | Q6HN77 | DE | Potassium-translocating ATPase C chain;                                                                                                                                                                     |
| P | Q6HN77 | DE | Potassium-transporting ATPase C chain;                                                                                                                                                                      |
| P | Q6HN77 | DR | potassium-transporting ATPase activity                                                                                                                                                                      |
| P | Q6HN78 | CC | One of the components of the high-affinity ATP-driven potassium transport (or KDP) system, which catalyzes the hydrolysis of ATP coupled with the exchange of hydrogen and potassium ions (By similarity).  |
| P | Q6HN78 | DE | Potassium-binding and translocating subunit B;                                                                                                                                                              |
| P | Q6HN78 | DE | Potassium-translocating ATPase B chain;                                                                                                                                                                     |
| P | Q6HN78 | DE | Potassium-transporting ATPase B chain;                                                                                                                                                                      |
| P | Q6HN78 | DR | potassium-transporting ATPase activity                                                                                                                                                                      |
| P | Q6HN79 | CC | One of the components of the high-affinity ATP-driven potassium transport (or KDP) system, which catalyzes the hydrolysis of ATP coupled with the exchange of hydrogen and potassium ions (By similarity).  |
| P | Q6HN79 | DE | Potassium-binding and translocating subunit A;                                                                                                                                                              |
| P | Q6HN79 | DE | Potassium-translocating ATPase A chain;                                                                                                                                                                     |

|   |        |    |                                                                                                                                       |
|---|--------|----|---------------------------------------------------------------------------------------------------------------------------------------|
| P | Q6HN79 | DE | Potassium-transporting ATPase A chain;                                                                                                |
| P | Q6HN79 | DR | potassium-transporting ATPase activity                                                                                                |
| P | Q6HNE7 | CC | Part of the ABC transporter complex RbsABCD involved in ribose import                                                                 |
| P | Q6HNE7 | DE | Ribose import ATP-binding protein RbsA;                                                                                               |
| P | Q6HP89 | CC | Part of the ABC transporter complex MetNIQ involved in methionine import                                                              |
| P | Q6HP89 | DE | Methionine import ATP-binding protein MetN 1;                                                                                         |
| P | Q6J4K2 | CC | In contrast to other members of the family its function is independent of K+.                                                         |
| P | Q6J4K2 | CC | Transports Ca2+ in exchange for either Li+ or Na+, explaining how Li+ catalyzes Ca2+ exchange                                         |
| P | Q6J4K2 | CC | Transports Ca2+ in exchange for either Li+ or Na+, explaining how Li+ catalyzes Ca2+ exchange                                         |
| P | Q6J4K2 | DE | Na+/K+/Ca2+-exchange protein 6;                                                                                                       |
| P | Q6J4K2 | DE | Na+/K+/Ca2+-exchange protein 6;                                                                                                       |
| P | Q6J4K2 | DE | Na+/K+/Ca2+-exchange protein 6;                                                                                                       |
| P | Q6J4K2 | DE | Sodium/potassium/calcium exchanger 6;                                                                                                 |
| P | Q6J4K2 | DE | Sodium/potassium/calcium exchanger 6;                                                                                                 |
| P | Q6J4K2 | DE | Sodium/potassium/calcium exchanger 6;                                                                                                 |
| P | Q6J4K2 | DR | calcium:cation antiporter activity                                                                                                    |
| P | Q6K1C4 | CC | Translocates Ca2+ and other metal ions into vacuoles using the proton gradient formed by H+-ATPase and H+-pyrophosphatase.            |
| P | Q6K1C4 | DE | Ca2+/H+ exchanger 3;                                                                                                                  |
| P | Q6K215 | CC | Aquaporins facilitate the transport of water and small neutral solutes across cell membranes (By similarity).                         |
| P | Q6KIP2 | CC | Part of the ABC transporter complex PotABCD involved in                                                                               |
| P | Q6KIP2 | CC | Part of the ABC transporter complex PotABCD involved in                                                                               |
| P | Q6KIP2 | DE | Spermidine/putrescine import ATP-binding protein PotA;                                                                                |
| P | Q6KIP2 | DE | Spermidine/putrescine import ATP-binding protein PotA;                                                                                |
| P | Q6KIS8 | CC | Part of the ABC transporter complex PstSACB involved in phosphate import                                                              |
| P | Q6KIS8 | DE | ABC phosphate transporter;                                                                                                            |
| P | Q6KIS8 | DE | Phosphate import ATP-binding protein PstB;                                                                                            |
| P | Q6KIS8 | DE | Phosphate-transporting ATPase;                                                                                                        |
| P | Q6KIS8 | DR | inorganic phosphate transmembrane transporter activity                                                                                |
| P | Q6KIS8 | DR | phosphate transmembrane-transporting ATPase activity                                                                                  |
| P | Q6LG82 | CC | Involved in the import of serine and threonine into the cell, with the concomitant import of sodium (symport system) (By similarity). |
| P | Q6LG82 | DE | Na+/serine-threonine symporter;                                                                                                       |
| P | Q6LG82 | DR | sodium:dicarboxylate symporter activity                                                                                               |
| P | Q6LG82 | DR | sodium:dicarboxylate symporter activity                                                                                               |
| P | Q6LH11 | CC | Part of the ABC transporter complex RbsABCD involved in ribose import                                                                 |
| P | Q6LH11 | DE | Ribose import ATP-binding protein RbsA;                                                                                               |
| P | Q6LHL2 | CC | Part of the ABC transporter complex ModABC involved in molybdenum import                                                              |
| P | Q6LHL2 | DE | Molybdenum import ATP-binding protein ModC;                                                                                           |
| P | Q6LHL2 | DR | molybdenum ion transmembrane transporter activity                                                                                     |
| P | Q6LN52 | CC | Part of the ABC transporter complex MetNIQ involved in methionine import                                                              |
| P | Q6LN52 | DE | Methionine import ATP-binding protein MetN;                                                                                           |
| P | Q6LN52 | DR | D-methionine transmembrane transporter activity                                                                                       |
| P | Q6LNY8 | CC | Na+/H+ antiporter that excludes sodium in exchange for external protons (By similarity)                                               |
| P | Q6LNY8 | DE | Na+/H+ antiporter nhaB;                                                                                                               |
| P | Q6LNY8 | DE | Sodium/proton antiporter nhaB;                                                                                                        |
| P | Q6LNY8 | DR | sodium:hydrogen antiporter activity                                                                                                   |
| P | Q6LQ77 | CC | Part of the ABC transporter complex BtuCDF involved in vitamin B12 import                                                             |
| P | Q6LQ77 | DE | Vitamin B12 import ATP-binding protein BtuD;                                                                                          |
| P | Q6LQ77 | DE | Vitamin B12-transporting ATPase;                                                                                                      |
| P | Q6LQC0 | CC | Part of the ABC transporter complex HmuTUV involved in hemin import                                                                   |
| P | Q6LQC0 | DE | Hemin import ATP-binding protein HmuV;                                                                                                |
| P | Q6LR20 | CC | Part of the ABC transporter complex PotABCD involved in                                                                               |
| P | Q6LR20 | CC | Part of the ABC transporter complex PotABCD involved in                                                                               |
| P | Q6LR20 | DE | Spermidine/putrescine import ATP-binding protein PotA;                                                                                |
| P | Q6LR20 | DE | Spermidine/putrescine import ATP-binding protein PotA;                                                                                |
| P | Q6LSC4 | CC | Part of the ABC transporter complex PstSACB involved in phosphate import                                                              |
| P | Q6LSC4 | DE | ABC phosphate transporter 2;                                                                                                          |
| P | Q6LSC4 | DE | Phosphate import ATP-binding protein PstB 2;                                                                                          |
| P | Q6LSC4 | DE | Phosphate-transporting ATPase 2;                                                                                                      |
| P | Q6LSC4 | DR | inorganic phosphate transmembrane transporter activity                                                                                |
| P | Q6LSC4 | DR | phosphate transmembrane-transporting ATPase activity                                                                                  |

|   |        |    |                                                                                                                                                                                         |
|---|--------|----|-----------------------------------------------------------------------------------------------------------------------------------------------------------------------------------------|
| P | Q6LTB1 | CC | Part of the ABC transporter complex ZnuABC involved in zinc import                                                                                                                      |
| P | Q6LTB1 | DE | Zinc import ATP-binding protein ZnuC;                                                                                                                                                   |
| P | Q6LTB1 | DR | zinc transporting ATPase activity                                                                                                                                                       |
| P | Q6LTL7 | CC | Part of the ABC transporter complex CcmAB involved in the biogenesis of c-type cytochromes; once thought to export heme, this seems not to be the case, but its exact role is uncertain |
| P | Q6LTL7 | DE | Heme exporter protein A;                                                                                                                                                                |
| P | Q6LTL7 | DR | heme-transporting ATPase activity                                                                                                                                                       |
| P | Q6LU82 | CC | Part of the ABC transporter complex PstSACB involved in phosphate import                                                                                                                |
| P | Q6LU82 | DE | ABC phosphate transporter 1;                                                                                                                                                            |
| P | Q6LU82 | DE | Phosphate import ATP-binding protein PstB 1;                                                                                                                                            |
| P | Q6LU82 | DE | Phosphate-transporting ATPase 1;                                                                                                                                                        |
| P | Q6LU82 | DR | inorganic phosphate transmembrane transporter activity                                                                                                                                  |
| P | Q6LU82 | DR | phosphate transmembrane-transporting ATPase activity                                                                                                                                    |
| P | Q6LUL9 | CC | Na <sup>+</sup> /H <sup>+</sup> antiporter that excludes sodium in exchange for external protons (By similarity)                                                                        |
| P | Q6LUL9 | DE | Na <sup>+</sup> /H <sup>+</sup> antiporter nhaA;                                                                                                                                        |
| P | Q6LUL9 | DE | Sodium/proton antiporter nhaA;                                                                                                                                                          |
| P | Q6LUR6 | CC | Binds vitamin B12 and delivers it to the periplasmic surface of BtuC (By similarity)                                                                                                    |
| P | Q6LUR6 | CC | Part of the ABC transporter complex BtuCDF involved in vitamin B12 import                                                                                                               |
| P | Q6LUY1 | CC | Part of the ABC transporter complex XylFGH involved in xylose import                                                                                                                    |
| P | Q6LUY1 | DE | Xylose import ATP-binding protein XylG;                                                                                                                                                 |
| P | Q6LUY1 | DR | D-xylose-importing ATPase activity                                                                                                                                                      |
| P | Q6LX70 | DR | cobalt ion transmembrane transporter activity                                                                                                                                           |
| P | Q6LY93 | CC | Part of the ABC transporter complex PstSACB involved in phosphate import                                                                                                                |
| P | Q6LY93 | DE | ABC phosphate transporter;                                                                                                                                                              |
| P | Q6LY93 | DE | Phosphate import ATP-binding protein PstB;                                                                                                                                              |
| P | Q6LY93 | DE | Phosphate-transporting ATPase;                                                                                                                                                          |
| P | Q6LY93 | DR | inorganic phosphate transmembrane transporter activity                                                                                                                                  |
| P | Q6LY93 | DR | phosphate transmembrane-transporting ATPase activity                                                                                                                                    |
| P | Q6MCV4 | CC | Part of the ABC transporter complex F0F1F4F5 involved in spermidine/putrescine import                                                                                                   |
| P | Q6MCV4 | CC | Part of the ABC transporter complex F0F1F4F5 involved in spermidine/putrescine import                                                                                                   |
| P | Q6MCV4 | DE | Spermidine/putrescine import ATP-binding protein PotA;                                                                                                                                  |
| P | Q6MCV4 | DE | Spermidine/putrescine import ATP-binding protein PotA;                                                                                                                                  |
| P | Q6MD10 | DE | Lipoprotein-releasing system ATP-binding protein LolD;                                                                                                                                  |
| P | Q6MD10 | DR | lipoprotein transporter activity                                                                                                                                                        |
| P | Q6ME20 | CC | Part of the ABC transporter complex MetNIQ involved in methionine import                                                                                                                |
| P | Q6ME20 | DE | Methionine import ATP-binding protein MetN;                                                                                                                                             |
| P | Q6MLL0 | CC | Transport of potassium into the cell (By similarity).                                                                                                                                   |
| P | Q6MLL0 | DE | Probable potassium transport system protein kup;                                                                                                                                        |
| P | Q6MLL0 | DR | potassium ion transmembrane transporter activity                                                                                                                                        |
| P | Q6MMH0 | CC | Part of the ABC transporter complex PstSACB involved in phosphate import                                                                                                                |
| P | Q6MMH0 | DE | ABC phosphate transporter;                                                                                                                                                              |
| P | Q6MMH0 | DE | Phosphate import ATP-binding protein PstB;                                                                                                                                              |
| P | Q6MMH0 | DE | Phosphate-transporting ATPase;                                                                                                                                                          |
| P | Q6MMH0 | DR | inorganic phosphate transmembrane transporter activity                                                                                                                                  |
| P | Q6MMH0 | DR | phosphate transmembrane-transporting ATPase activity                                                                                                                                    |
| P | Q6MMY0 | DE | Lipoprotein-releasing system ATP-binding protein LolD;                                                                                                                                  |
| P | Q6MMY0 | DR | lipoprotein transporter activity                                                                                                                                                        |
| P | Q6MTC1 | CC | Part of the ABC transporter complex PstSACB involved in phosphate import                                                                                                                |
| P | Q6MTC1 | DE | ABC phosphate transporter;                                                                                                                                                              |
| P | Q6MTC1 | DE | Phosphate import ATP-binding protein PstB;                                                                                                                                              |
| P | Q6MTC1 | DE | Phosphate-transporting ATPase;                                                                                                                                                          |
| P | Q6MTC1 | DR | inorganic phosphate transmembrane transporter activity                                                                                                                                  |
| P | Q6MTC1 | DR | phosphate transmembrane-transporting ATPase activity                                                                                                                                    |
| P | Q6MU19 | CC | Part of the ABC transporter complex F0F1F4F5 involved in spermidine/putrescine import                                                                                                   |
| P | Q6MU19 | CC | Part of the ABC transporter complex F0F1F4F5 involved in spermidine/putrescine import                                                                                                   |
| P | Q6MU19 | DE | Spermidine/putrescine import ATP-binding protein PotA;                                                                                                                                  |
| P | Q6MU19 | DE | Spermidine/putrescine import ATP-binding protein PotA;                                                                                                                                  |
| P | Q6MUF4 | DR | phosphonate transmembrane-transporting ATPase activity                                                                                                                                  |
| P | Q6N0I5 | CC | Part of the ABC transporter complex PstSACB involved in phosphate import                                                                                                                |
| P | Q6N0I5 | DE | ABC phosphate transporter;                                                                                                                                                              |
| P | Q6N0I5 | DE | Phosphate import ATP-binding protein PstB;                                                                                                                                              |
| P | Q6N0I5 | DE | Phosphate-transporting ATPase;                                                                                                                                                          |
| P | Q6N0I5 | DR | inorganic phosphate transmembrane transporter activity                                                                                                                                  |
| P | Q6N0I5 | DR | phosphate transmembrane-transporting ATPase activity                                                                                                                                    |

|   |        |    |                                                                                                                                                                                                            |
|---|--------|----|------------------------------------------------------------------------------------------------------------------------------------------------------------------------------------------------------------|
| P | Q6N0P7 | CC | Part of the ABC transporter complex ModABC involved in molybdenum import                                                                                                                                   |
| P | Q6N0P7 | DE | Molybdenum import ATP-binding protein ModC;                                                                                                                                                                |
| P | Q6N0P7 | DR | molybdenum ion transmembrane transporter activity                                                                                                                                                          |
| P | Q6N5F2 | CC | Transport of potassium into the cell (By similarity).                                                                                                                                                      |
| P | Q6N5F2 | DE | Probable potassium transport system protein kup 1;                                                                                                                                                         |
| P | Q6N5F2 | DR | potassium ion transmembrane transporter activity                                                                                                                                                           |
| P | Q6N5G6 | CC | Transport of potassium into the cell (By similarity).                                                                                                                                                      |
| P | Q6N5G6 | DE | Probable potassium transport system protein kup 2;                                                                                                                                                         |
| P | Q6N5G6 | DR | potassium ion transmembrane transporter activity                                                                                                                                                           |
| P | Q6N5H0 | CC | One of the components of the high-affinity ATP-driven potassium transport (or KDP) system, which catalyzes the hydrolysis of ATP coupled with the exchange of hydrogen and potassium ions (By similarity). |
| P | Q6N5H0 | DE | Potassium-binding and translocating subunit A;                                                                                                                                                             |
| P | Q6N5H0 | DE | Potassium-translocating ATPase A chain;                                                                                                                                                                    |
| P | Q6N5H0 | DE | Potassium-transporting ATPase A chain;                                                                                                                                                                     |
| P | Q6N5H0 | DR | potassium-transporting ATPase activity                                                                                                                                                                     |
| P | Q6N5H2 | CC | One of the components of the high-affinity ATP-driven potassium transport (or KDP) system, which catalyzes the hydrolysis of ATP coupled with the exchange of hydrogen and potassium ions                  |
| P | Q6N5H2 | DE | Potassium-binding and translocating subunit C;                                                                                                                                                             |
| P | Q6N5H2 | DE | Potassium-translocating ATPase C chain;                                                                                                                                                                    |
| P | Q6N5H2 | DE | Potassium-transporting ATPase C chain;                                                                                                                                                                     |
| P | Q6N5H2 | DR | potassium-transporting ATPase activity                                                                                                                                                                     |
| P | Q6N5P8 | DE | Lipoprotein-releasing system ATP-binding protein LolD 2;                                                                                                                                                   |
| P | Q6N5P8 | DR | lipoprotein transporter activity                                                                                                                                                                           |
| P | Q6N798 | CC | Part of the ABC transporter complex MetNIQ involved in methionine import                                                                                                                                   |
| P | Q6N798 | DE | Methionine import ATP-binding protein MetN 2;                                                                                                                                                              |
| P | Q6N7Y6 | CC | Part of the ABC transporter complex HmuTUV involved in hemin import                                                                                                                                        |
| P | Q6N7Y6 | DE | Hemin import ATP-binding protein HmuV;                                                                                                                                                                     |
| P | Q6N893 | CC | Transport of potassium into the cell (By similarity).                                                                                                                                                      |
| P | Q6N893 | DE | Probable potassium transport system protein kup 3;                                                                                                                                                         |
| P | Q6N893 | DR | potassium ion transmembrane transporter activity                                                                                                                                                           |
| P | Q6N999 | DE | Lipoprotein-releasing system ATP-binding protein LolD 1;                                                                                                                                                   |
| P | Q6N999 | DR | lipoprotein transporter activity                                                                                                                                                                           |
| P | Q6N9W0 | CC | Part of the ABC transporter complex MetNIQ involved in methionine import                                                                                                                                   |
| P | Q6N9W0 | DE | Methionine import ATP-binding protein MetN 1;                                                                                                                                                              |
| P | Q6NA00 | DR | phosphonate transmembrane-transporting ATPase activity                                                                                                                                                     |
| P | Q6NBT1 | CC | Part of the ABC transporter complex CysAW 1F involved in sulfate/inosulfate transport                                                                                                                      |
| P | Q6NBT1 | DE | Sulfate-transporting ATPase;                                                                                                                                                                               |
| P | Q6NBT1 | DE | Sulfate/thiosulfate import ATP-binding protein CysA;                                                                                                                                                       |
| P | Q6NBT1 | DR | sulfate transmembrane-transporting ATPase activity                                                                                                                                                         |
| P | Q6NDA6 | CC | Part of the ABC transporter complex CcmAB involved in the biogenesis of c-type cytochromes; once thought to export heme, this seems not to be the case, but its exact role is uncertain                    |
| P | Q6NDA6 | DE | Heme exporter protein A;                                                                                                                                                                                   |
| P | Q6NDA6 | DR | heme-transporting ATPase activity                                                                                                                                                                          |
| P | Q6NDQ0 | DR | glycerol-3-phosphate-transporting ATPase activity                                                                                                                                                          |
| P | Q6NHP1 | DE | Lysine exporter protein;                                                                                                                                                                                   |
| P | Q6NJ07 | CC | Part of the ABC transporter complex MetNIQ involved in methionine import                                                                                                                                   |
| P | Q6NJ07 | DE | Methionine import ATP-binding protein MetN;                                                                                                                                                                |
| P | Q6NUK1 | CC | May act as a ATP-Mg/Pi exchanger that mediates the transport of Mg-ATP in exchange for phosphate, catalyzing the net uptake or efflux of adenine nucleotides into or from the mitochondria.                |
| P | Q6NVV3 | CC | Can also transport other divalent cations such as Fe(2+), Sr(2+), Ba(2+), Mn(2+), Cu(2+) and Co(2+) but to a much less extent than Mg2+ (By similarity).                                                   |
| P | Q6NVV3 | DE | Magnesium transporter NIPA3;                                                                                                                                                                               |
| P | Q6NXX8 | CC | Cation channel with high affinity for sodium, which is gated by extracellular protons and inhibited by the diuretic amiloride                                                                              |
| P | Q6NXX8 | DE | Brain sodium channel 2;                                                                                                                                                                                    |
| P | Q6NXX8 | DR | ligand-gated sodium channel activity                                                                                                                                                                       |
| P | Q6NXT4 | CC | Zinc-efflux transporter which allocates the cytoplasmic zinc to the trans-Golgi network (TGN) as well as the vesicular compartment (By similarity).                                                        |
| P | Q6NXT4 | DE | Zinc transporter 6;                                                                                                                                                                                        |
| P | Q6NXT4 | DR | zinc ion transmembrane transporter activity                                                                                                                                                                |
| P | Q6P5F6 | DE | Zinc transporter ZIP10;                                                                                                                                                                                    |

|   |        |    |                                                                                                                                                                                                                                      |
|---|--------|----|--------------------------------------------------------------------------------------------------------------------------------------------------------------------------------------------------------------------------------------|
| P | Q6P5W5 | CC | Plays an important role in cellular zinc homeostasis as a zinc transporter                                                                                                                                                           |
| P | Q6P5W5 | CC | Regulated in response to zinc availability (By similarity).                                                                                                                                                                          |
| P | Q6P5W5 | DE | Zinc transporter ZIP4;                                                                                                                                                                                                               |
| P | Q6P5W5 | DR | zinc ion transmembrane transporter activity                                                                                                                                                                                          |
| P | Q6PEM8 | CC | Dietary heme iron is an important nutritional source of iron                                                                                                                                                                         |
| P | Q6PEM8 | CC | Has been shown to act both as an intestinal proton- coupled high-affinity folate transporter and as an intestinal heme transporter which mediates heme uptake from the gut lumen into duodenal epithelial cells                      |
| P | Q6PEM8 | CC | Has been shown to act both as an intestinal proton- coupled high-affinity folate transporter and as an intestinal heme transporter which mediates heme uptake from the gut lumen into duodenal epithelial cells                      |
| P | Q6PEM8 | CC | Shows a higher affinity for folate than heme.                                                                                                                                                                                        |
| P | Q6PEM8 | CC | Shows a higher affinity for folate than heme.                                                                                                                                                                                        |
| P | Q6PEM8 | CC | The iron is then released from heme and may be transported into the bloodstream                                                                                                                                                      |
| P | Q6PEM8 | DE | Heme carrier protein 1;                                                                                                                                                                                                              |
| P | Q6PEM8 | DE | Proton-coupled folate transporter;                                                                                                                                                                                                   |
| P | Q6PEM8 | DR | folic acid transporter activity                                                                                                                                                                                                      |
| P | Q6PEM8 | DR | heme transporter activity                                                                                                                                                                                                            |
| P | Q6PGE7 | CC | Terminates the action of proline by its high affinity sodium-dependent reuptake into presynaptic terminals (By similarity).                                                                                                          |
| P | Q6PGE7 | CC | Terminates the action of proline by its high affinity sodium-dependent reuptake into presynaptic terminals (By similarity).                                                                                                          |
| P | Q6PGE7 | DE | Sodium-dependent proline transporter;                                                                                                                                                                                                |
| P | Q6PGE7 | DE | Sodium-dependent proline transporter;                                                                                                                                                                                                |
| P | Q6PGE7 | DR | neurotransmitter:sodium symporter activity                                                                                                                                                                                           |
| P | Q6PIE5 | CC | This action creates the electrochemical gradient of sodium and potassium ions, providing the energy for active transport of various nutrients (By similarity).                                                                       |
| P | Q6PIE5 | CC | This action creates the electrochemical gradient of sodium and potassium ions, providing the energy for active transport of various nutrients (By similarity).                                                                       |
| P | Q6PIE5 | CC | This is the catalytic component of the active enzyme, which catalyzes the hydrolysis of ATP coupled with the exchange of sodium and potassium ions across the plasma membrane                                                        |
| P | Q6PIE5 | CC | This is the catalytic component of the active enzyme, which catalyzes the hydrolysis of ATP coupled with the exchange of sodium and potassium ions across the plasma membrane                                                        |
| P | Q6PIE5 | DE | Na+/K+ ATPase alpha(+) subunit;                                                                                                                                                                                                      |
| P | Q6PIE5 | DE | Na+/K+ ATPase alpha(+) subunit;                                                                                                                                                                                                      |
| P | Q6PIE5 | DE | Na+/K+ ATPase alpha-2 subunit;                                                                                                                                                                                                       |
| P | Q6PIE5 | DE | Na+/K+ ATPase alpha-2 subunit;                                                                                                                                                                                                       |
| P | Q6PIE5 | DE | Sodium pump subunit alpha-2;                                                                                                                                                                                                         |
| P | Q6PIE5 | DE | Sodium/potassium-transporting ATPase subunit alpha-2;                                                                                                                                                                                |
| P | Q6PIE5 | DE | Sodium/potassium-transporting ATPase subunit alpha-2;                                                                                                                                                                                |
| P | Q6PIE5 | DR | sodium:potassium-exchanging ATPase activity                                                                                                                                                                                          |
| P | Q6PIE5 | DR | sodium:potassium-exchanging ATPase activity                                                                                                                                                                                          |
| P | Q6PIU1 | CC | Potassium channel subunit that does not form functional channels by itself                                                                                                                                                           |
| P | Q6PIU1 | DE | Neuronal potassium channel alpha subunit HNKA;                                                                                                                                                                                       |
| P | Q6PIU1 | DE | Potassium voltage-gated channel subfamily V member 1;                                                                                                                                                                                |
| P | Q6PIU1 | DE | Voltage-gated potassium channel subunit Kv8.1;                                                                                                                                                                                       |
| P | Q6PIU1 | DR | potassium channel regulator activity                                                                                                                                                                                                 |
| P | Q6PIU1 | DR | voltage-gated potassium channel activity                                                                                                                                                                                             |
| P | Q6PML9 | DE | Zinc transporter 9;                                                                                                                                                                                                                  |
| P | Q6PXP3 | CC | High-affinity transporter for glucose and fructose Does not transport galactose, 2-deoxy-d-glucose and xylose.                                                                                                                       |
| P | Q6PXP3 | DE | Glucose transporter type 7;                                                                                                                                                                                                          |
| P | Q6PXP3 | DE | Solute carrier family 2, facilitated glucose transporter member 7;                                                                                                                                                                   |
| P | Q6QIY3 | CC | Assuming opened or closed conformations in response to the voltage difference across the membrane, the protein forms a sodium-selective channel through which sodium ions may pass in accordance with their electrochemical gradient |
| P | Q6QIY3 | CC | It is a tetrodotoxin-resistant sodium channel isoform                                                                                                                                                                                |
| P | Q6QIY3 | CC | This protein mediates the voltage-dependent sodium ion permeability of excitable membranes                                                                                                                                           |
| P | Q6QIY3 | DE | Peripheral nerve sodium channel 3;                                                                                                                                                                                                   |
| P | Q6QIY3 | DE | Sensory neuron sodium channel;                                                                                                                                                                                                       |
| P | Q6QIY3 | DE | Sodium channel protein type 10 subunit alpha;                                                                                                                                                                                        |
| P | Q6QIY3 | DE | Sodium channel protein type X subunit alpha;                                                                                                                                                                                         |

|   |        |    |                                                                                                                                                                                                            |
|---|--------|----|------------------------------------------------------------------------------------------------------------------------------------------------------------------------------------------------------------|
| P | Q6QIY3 | DE | Voltage-gated sodium channel subunit alpha Nav1.8;                                                                                                                                                         |
| P | Q6QIY3 | DR | voltage-gated sodium channel activity                                                                                                                                                                      |
| P | Q6U841 | CC | Electrogenic sodium/bicarbonate cotransporter in exchange for intracellular chloride                                                                                                                       |
| P | Q6U841 | CC | Electrogenic sodium/bicarbonate cotransporter in exchange for intracellular chloride                                                                                                                       |
| P | Q6U841 | DE | Sodium-driven chloride bicarbonate exchanger;                                                                                                                                                              |
| P | Q6UP69 | DE | Mercury ion transport protein;                                                                                                                                                                             |
| P | Q6UP69 | DR | mercury ion transmembrane transporter activity                                                                                                                                                             |
| P | Q6UP70 | DE | Periplasmic mercury ion binding protein;                                                                                                                                                                   |
| P | Q6UP70 | DR | mercury ion transmembrane transporter activity                                                                                                                                                             |
| P | Q6UVM3 | CC | Outward rectifying potassium channel                                                                                                                                                                       |
| P | Q6UVM3 | CC | Produces rapidly activating outward rectifier K+ currents                                                                                                                                                  |
| P | Q6UVM3 | DE | Potassium channel subfamily T member 2;                                                                                                                                                                    |
| P | Q6UVM3 | DE | Sequence like an intermediate conductance potassium channel subunit;                                                                                                                                       |
| P | Q6UVM3 | DE | Sodium and chloride-activated ATP-sensitive potassium channel Slo2.1;                                                                                                                                      |
| P | Q6VV64 | CC | may function as background potassium channel that sets the resting membrane potential                                                                                                                      |
| P | Q6VV64 | CC | Outward rectifying potassium channel                                                                                                                                                                       |
| P | Q6VV64 | CC | Produces rapidly activating outward rectifier K+ currents                                                                                                                                                  |
| P | Q6VV64 | DE | Potassium channel subfamily K member 18;                                                                                                                                                                   |
| P | Q6VV64 | DE | Two-pore-domain potassium channel TRESK;                                                                                                                                                                   |
| P | Q6VVA6 | CC | High-affinity potassium transporter                                                                                                                                                                        |
| P | Q6VVA6 | DE | Potassium transporter 1;                                                                                                                                                                                   |
| P | Q6VVA6 | DR | potassium ion transmembrane transporter activity                                                                                                                                                           |
| P | Q6X1Y6 | CC | Cation channel with high affinity for sodium, which is gated by extracellular protons and inhibited by the diuretic amiloride                                                                              |
| P | Q6XR72 | CC | May be involved in zinc transport out of the cell, being a zinc-efflux transporter (By similarity).                                                                                                        |
| P | Q6XR72 | DE | Zinc transporter 10;                                                                                                                                                                                       |
| P | Q6YPR6 | CC | Part of the ABC transporter complex POTABCD involved in spermidine/putrescine import                                                                                                                       |
| P | Q6YPR6 | CC | Part of the ABC transporter complex POTABCD involved in spermidine/putrescine import                                                                                                                       |
| P | Q6YPR6 | DE | Spermidine/putrescine import ATP-binding protein PotA;                                                                                                                                                     |
| P | Q6YPR6 | DE | Spermidine/putrescine import ATP-binding protein PotA;                                                                                                                                                     |
| P | Q6YSA9 | CC | High-affinity potassium transporter (By similarity).                                                                                                                                                       |
| P | Q6YSA9 | DE | Probable potassium transporter 4;                                                                                                                                                                          |
| P | Q6YSA9 | DR | potassium ion transmembrane transporter activity                                                                                                                                                           |
| P | Q6YWQ4 | CC | High-affinity potassium transporter (By similarity).                                                                                                                                                       |
| P | Q6YWQ4 | DE | Potassium transporter 25;                                                                                                                                                                                  |
| P | Q6YWQ4 | DR | potassium ion transmembrane transporter activity                                                                                                                                                           |
| P | Q6ZMH5 | CC | may play a role in polarized cells by carrying out serosal-to-mucosal zinc transport                                                                                                                       |
| P | Q6ZMH5 | CC | Seems to play a central role in controlling organismal zinc status (By similarity).                                                                                                                        |
| P | Q6ZMH5 | DE | Zinc transporter ZIP5;                                                                                                                                                                                     |
| P | Q6ZPR4 | CC | Outwardly rectifying potassium channel subunit that may co-assemble with other Slo-type channel subunits                                                                                                   |
| P | Q6ZPR4 | DE | Potassium channel subfamily T member 1;                                                                                                                                                                    |
| P | Q6ZQN7 | CC | May be involved in the first step of the transport pathway of digoxin and various compounds into the urine in the kidney                                                                                   |
| P | Q6ZSM3 | CC | Proton-linked monocarboxylate transporter                                                                                                                                                                  |
| P | Q6ZSM3 | DE | Monocarboxylate transporter 12;                                                                                                                                                                            |
| P | Q71RS6 | CC | Probably transports 1 Ca2+ and 1 K+ in exchange for 4 Na+.                                                                                                                                                 |
| P | Q71RS6 | CC | Probably transports 1 Ca2+ and 1 K+ in exchange for 4 Na+.                                                                                                                                                 |
| P | Q71RS6 | CC | Probably transports 1 Ca2+ and 1 K+ in exchange for 4 Na+.                                                                                                                                                 |
| P | Q71RS6 | DE | Na+/K+/Ca2+-exchange protein 5;                                                                                                                                                                            |
| P | Q71RS6 | DE | Na+/K+/Ca2+-exchange protein 5;                                                                                                                                                                            |
| P | Q71RS6 | DE | Na+/K+/Ca2+-exchange protein 5;                                                                                                                                                                            |
| P | Q71RS6 | DE | Sodium/potassium/calcium exchanger 5;                                                                                                                                                                      |
| P | Q71RS6 | DE | Sodium/potassium/calcium exchanger 5;                                                                                                                                                                      |
| P | Q71RS6 | DE | Sodium/potassium/calcium exchanger 5;                                                                                                                                                                      |
| P | Q71RS6 | DR | calcium, potassium:sodium antiporter activity                                                                                                                                                              |
| P | Q71RS6 | DR | calcium, potassium:sodium antiporter activity                                                                                                                                                              |
| P | Q71RS6 | DR | calcium, potassium:sodium antiporter activity                                                                                                                                                              |
| P | Q71W89 | CC | One of the components of the high-affinity ATP-driven potassium transport (or KDP) system, which catalyzes the hydrolysis of ATP coupled with the exchange of hydrogen and potassium ions (By similarity). |
| P | Q71W89 | DE | Potassium-binding and translocating subunit A;                                                                                                                                                             |
| P | Q71W89 | DE | Potassium-translocating ATPase A chain;                                                                                                                                                                    |
| P | Q71W89 | DE | Potassium-transporting ATPase A chain;                                                                                                                                                                     |



|   |        |    |                                                                                                                                                                                                            |
|---|--------|----|------------------------------------------------------------------------------------------------------------------------------------------------------------------------------------------------------------|
| P | Q71W89 | DR | potassium-transporting ATPase activity                                                                                                                                                                     |
| P | Q71W90 | CC | One of the components of the high-affinity ATP-driven potassium transport (or KDP) system, which catalyzes the hydrolysis of ATP coupled with the exchange of hydrogen and potassium ions (By similarity). |
| P | Q71W90 | DE | Potassium-binding and translocating subunit B;                                                                                                                                                             |
| P | Q71W90 | DE | Potassium-translocating ATPase B chain;                                                                                                                                                                    |
| P | Q71W90 | DE | Potassium-transporting ATPase B chain;                                                                                                                                                                     |
| P | Q71W90 | DR | potassium-transporting ATPase activity                                                                                                                                                                     |
| P | Q71W91 | CC | One of the components of the high-affinity ATP-driven potassium transport (or KDP) system, which catalyzes the hydrolysis of ATP coupled with the exchange of hydrogen and potassium ions                  |
| P | Q71W91 | DE | Potassium-binding and translocating subunit C;                                                                                                                                                             |
| P | Q71W91 | DE | Potassium-translocating ATPase C chain;                                                                                                                                                                    |
| P | Q71W91 | DE | Potassium-transporting ATPase C chain;                                                                                                                                                                     |
| P | Q71W91 | DR | potassium-transporting ATPase activity                                                                                                                                                                     |
| P | Q71WH7 | DR | cobalt ion transmembrane transporter activity                                                                                                                                                              |
| P | Q71WH8 | DR | cobalt ion transmembrane transporter activity                                                                                                                                                              |
| P | Q71WT2 | CC | Part of the ABC transporter complex PstSACB involved in phosphate import                                                                                                                                   |
| P | Q71WT2 | DE | ABC phosphate transporter 2;                                                                                                                                                                               |
| P | Q71WT2 | DE | Phosphate import ATP-binding protein PstB 2;                                                                                                                                                               |
| P | Q71WT2 | DE | Phosphate-transporting ATPase 2;                                                                                                                                                                           |
| P | Q71WT2 | DR | inorganic phosphate transmembrane transporter activity                                                                                                                                                     |
| P | Q71WT2 | DR | phosphate transmembrane-transporting ATPase activity                                                                                                                                                       |
| P | Q71WT3 | CC | Part of the ABC transporter complex PstSACB involved in phosphate import                                                                                                                                   |
| P | Q71WT3 | DE | ABC phosphate transporter 1;                                                                                                                                                                               |
| P | Q71WT3 | DE | Phosphate import ATP-binding protein PstB 1;                                                                                                                                                               |
| P | Q71WT3 | DE | Phosphate-transporting ATPase 1;                                                                                                                                                                           |
| P | Q71WT3 | DR | inorganic phosphate transmembrane transporter activity                                                                                                                                                     |
| P | Q71WT3 | DR | phosphate transmembrane-transporting ATPase activity                                                                                                                                                       |
| P | Q71ZP6 | CC | H+-stimulated, highly selective, manganese uptake system (By similarity).                                                                                                                                  |
| P | Q71ZP6 | DE | Probable manganese transport protein mntH;                                                                                                                                                                 |
| P | Q722B1 | CC | Part of the ABC transporter complex PotABCD involved in spermidine/putrescine import                                                                                                                       |
| P | Q722B1 | CC | Part of the ABC transporter complex PotABCD involved in spermidine/putrescine import                                                                                                                       |
| P | Q722B1 | DE | Spermidine/putrescine import ATP-binding protein PotA;                                                                                                                                                     |
| P | Q722B1 | DE | Spermidine/putrescine import ATP-binding protein PotA;                                                                                                                                                     |
| P | Q724C0 | CC | Part of the ABC transporter complex MetNIQ involved in methionine import                                                                                                                                   |
| P | Q724C0 | DE | Methionine import ATP-binding protein MetN 1;                                                                                                                                                              |
| P | Q725T6 | CC | One of the components of the high-affinity ATP-driven potassium transport (or KDP) system, which catalyzes the hydrolysis of ATP coupled with the exchange of hydrogen and potassium ions (By similarity). |
| P | Q725T6 | DE | Potassium-binding and translocating subunit A;                                                                                                                                                             |
| P | Q725T6 | DE | Potassium-translocating ATPase A chain;                                                                                                                                                                    |
| P | Q725T6 | DE | Potassium-transporting ATPase A chain;                                                                                                                                                                     |
| P | Q725T6 | DR | potassium-transporting ATPase activity                                                                                                                                                                     |
| P | Q729H7 | DE | Lipoprotein-releasing system ATP-binding protein LolD;                                                                                                                                                     |
| P | Q729H7 | DR | lipoprotein transporter activity                                                                                                                                                                           |
| P | Q72AQ6 | DR | phosphonate transmembrane-transporting ATPase activity                                                                                                                                                     |
| P | Q72D46 | CC | Part of the ABC transporter complex PstSACB involved in phosphate import                                                                                                                                   |
| P | Q72D46 | DE | ABC phosphate transporter;                                                                                                                                                                                 |
| P | Q72D46 | DE | Phosphate import ATP-binding protein PstB;                                                                                                                                                                 |
| P | Q72D46 | DE | Phosphate-transporting ATPase;                                                                                                                                                                             |
| P | Q72D46 | DR | inorganic phosphate transmembrane transporter activity                                                                                                                                                     |
| P | Q72D46 | DR | phosphate transmembrane-transporting ATPase activity                                                                                                                                                       |
| P | Q72FW5 | CC | Part of the ABC transporter complex PotABCD involved in spermidine/putrescine import                                                                                                                       |
| P | Q72FW5 | CC | Part of the ABC transporter complex PotABCD involved in spermidine/putrescine import                                                                                                                       |
| P | Q72FW5 | DE | Spermidine/putrescine import ATP-binding protein PotA;                                                                                                                                                     |
| P | Q72FW5 | DE | Spermidine/putrescine import ATP-binding protein PotA;                                                                                                                                                     |
| P | Q72GX5 | CC | Part of the ABC transporter complex PstSACB involved in phosphate import                                                                                                                                   |
| P | Q72GX5 | DE | ABC phosphate transporter;                                                                                                                                                                                 |
| P | Q72GX5 | DE | Phosphate import ATP-binding protein PstB;                                                                                                                                                                 |
| P | Q72GX5 | DE | Phosphate-transporting ATPase;                                                                                                                                                                             |
| P | Q72GX5 | DR | inorganic phosphate transmembrane transporter activity                                                                                                                                                     |
| P | Q72GX5 | DR | phosphate transmembrane-transporting ATPase activity                                                                                                                                                       |
| P | Q72N56 | DR | copper-exporting ATPase activity                                                                                                                                                                           |
| P | Q73GK9 | CC | Part of the ABC transporter complex ZnuABC involved in zinc import                                                                                                                                         |

|   |        |    |                                                                                                                                                                                                            |
|---|--------|----|------------------------------------------------------------------------------------------------------------------------------------------------------------------------------------------------------------|
| P | Q73GK9 | DE | Zinc import ATP-binding protein ZnuC;                                                                                                                                                                      |
| P | Q73GK9 | DR | zinc transporting ATPase activity                                                                                                                                                                          |
| P | Q73HX8 | CC | Part of the ABC transporter complex CcmAB involved in the biogenesis of c-type cytochromes; once thought to export heme, this seems not to be the case, but its exact role is uncertain                    |
| P | Q73HX8 | DE | Heme exporter protein A;                                                                                                                                                                                   |
| P | Q73HX8 | DR | heme-transporting ATPase activity                                                                                                                                                                          |
| P | Q73L25 | DE | Lipoprotein-releasing system ATP-binding protein LolD;                                                                                                                                                     |
| P | Q73L25 | DR | lipoprotein transporter activity                                                                                                                                                                           |
| P | Q73P71 | DR | phosphonate transmembrane-transporting ATPase activity                                                                                                                                                     |
| P | Q73XU8 | CC | Part of the ABC transporter complex CysAW involved in sulfate/thiosulfate import                                                                                                                           |
| P | Q73XU8 | DE | Sulfate-transporting ATPase;                                                                                                                                                                               |
| P | Q73XU8 | DE | Sulfate/thiosulfate import ATP-binding protein CysA;                                                                                                                                                       |
| P | Q73XU8 | DR | sulfate transmembrane-transporting ATPase activity                                                                                                                                                         |
| P | Q741T7 | CC | One of the components of the high-affinity ATP-driven potassium transport (or KDP) system, which catalyzes the hydrolysis of ATP coupled with the exchange of hydrogen and potassium ions (By similarity). |
| P | Q741T7 | DE | Potassium-binding and translocating subunit A;                                                                                                                                                             |
| P | Q741T7 | DE | Potassium-translocating ATPase A chain;                                                                                                                                                                    |
| P | Q741T7 | DE | Potassium-transporting ATPase A chain;                                                                                                                                                                     |
| P | Q741T7 | DR | potassium-transporting ATPase activity                                                                                                                                                                     |
| P | Q743D1 | CC | Part of the ABC transporter complex PstSACB involved in phosphate import                                                                                                                                   |
| P | Q743D1 | DE | ABC phosphate transporter;                                                                                                                                                                                 |
| P | Q743D1 | DE | Phosphate import ATP-binding protein PstB;                                                                                                                                                                 |
| P | Q743D1 | DE | Phosphate-transporting ATPase;                                                                                                                                                                             |
| P | Q743D1 | DR | inorganic phosphate transmembrane transporter activity                                                                                                                                                     |
| P | Q743D1 | DR | phosphate transmembrane-transporting ATPase activity                                                                                                                                                       |
| P | Q747C1 | CC | Transport of potassium into the cell (By similarity).                                                                                                                                                      |
| P | Q747C1 | DE | Probable potassium transport system protein kup 3;                                                                                                                                                         |
| P | Q747C1 | DR | potassium ion transmembrane transporter activity                                                                                                                                                           |
| P | Q74AA5 | CC | Transport of potassium into the cell (By similarity).                                                                                                                                                      |
| P | Q74AA5 | DE | Probable potassium transport system protein kup 2;                                                                                                                                                         |
| P | Q74AA5 | DR | potassium ion transmembrane transporter activity                                                                                                                                                           |
| P | Q74AA8 | CC | One of the components of the high-affinity ATP-driven potassium transport (or KDP) system, which catalyzes the hydrolysis of ATP coupled with the exchange of hydrogen and potassium ions                  |
| P | Q74AA8 | DE | Potassium-binding and translocating subunit C;                                                                                                                                                             |
| P | Q74AA8 | DE | Potassium-translocating ATPase C chain;                                                                                                                                                                    |
| P | Q74AA8 | DE | Potassium-transporting ATPase C chain;                                                                                                                                                                     |
| P | Q74AA8 | DR | potassium-transporting ATPase activity                                                                                                                                                                     |
| P | Q74AB0 | CC | One of the components of the high-affinity ATP-driven potassium transport (or KDP) system, which catalyzes the hydrolysis of ATP coupled with the exchange of hydrogen and potassium ions (By similarity). |
| P | Q74AB0 | DE | Potassium-binding and translocating subunit A;                                                                                                                                                             |
| P | Q74AB0 | DE | Potassium-translocating ATPase A chain;                                                                                                                                                                    |
| P | Q74AB0 | DE | Potassium-transporting ATPase A chain;                                                                                                                                                                     |
| P | Q74AB0 | DR | potassium-transporting ATPase activity                                                                                                                                                                     |
| P | Q74AK4 | CC | Transport of potassium into the cell (By similarity).                                                                                                                                                      |
| P | Q74AK4 | DE | Probable potassium transport system protein kup 1;                                                                                                                                                         |
| P | Q74AK4 | DR | potassium ion transmembrane transporter activity                                                                                                                                                           |
| P | Q74AP9 | CC | Na <sup>+</sup> /H <sup>+</sup> antiporter that extrudes sodium in exchange for external protons (By similarity)                                                                                           |
| P | Q74AP9 | DE | Na <sup>+</sup> /H <sup>+</sup> antiporter nhaA;                                                                                                                                                           |
| P | Q74AP9 | DE | Sodium/proton antiporter nhaA;                                                                                                                                                                             |
| P | Q74E68 | CC | Part of the ABC transporter complex PstSACB involved in phosphate import                                                                                                                                   |
| P | Q74E68 | DE | ABC phosphate transporter;                                                                                                                                                                                 |
| P | Q74E68 | DE | Phosphate import ATP-binding protein PstB;                                                                                                                                                                 |
| P | Q74E68 | DE | Phosphate-transporting ATPase;                                                                                                                                                                             |
| P | Q74E68 | DR | inorganic phosphate transmembrane transporter activity                                                                                                                                                     |
| P | Q74E68 | DR | phosphate transmembrane-transporting ATPase activity                                                                                                                                                       |
| P | Q74IV9 | CC | Part of the ABC transporter complex MetNIQ involved in methionine import                                                                                                                                   |
| P | Q74IV9 | DE | Methionine import ATP-binding protein MetN;                                                                                                                                                                |
| P | Q74K65 | CC | Part of the ABC transporter complex PotABCD involved in spermidine/putrescine import                                                                                                                       |
| P | Q74K65 | CC | Part of the ABC transporter complex PotABCD involved in spermidine/putrescine import                                                                                                                       |
| P | Q74K65 | DE | Spermidine/putrescine import ATP-binding protein PotA;                                                                                                                                                     |
| P | Q74K65 | DE | Spermidine/putrescine import ATP-binding protein PotA;                                                                                                                                                     |

|   |        |    |                                                                                                                                                                                                            |
|---|--------|----|------------------------------------------------------------------------------------------------------------------------------------------------------------------------------------------------------------|
| P | Q74KF8 | CC | Part of the ABC transporter complex PstSACB involved in phosphate import                                                                                                                                   |
| P | Q74KF8 | DE | ABC phosphate transporter 2;                                                                                                                                                                               |
| P | Q74KF8 | DE | Phosphate import ATP-binding protein PstB 2;                                                                                                                                                               |
| P | Q74KF8 | DE | Phosphate-transporting ATPase 2;                                                                                                                                                                           |
| P | Q74KF8 | DR | inorganic phosphate transmembrane transporter activity                                                                                                                                                     |
| P | Q74KF8 | DR | phosphate transmembrane-transporting ATPase activity                                                                                                                                                       |
| P | Q74KF9 | CC | Part of the ABC transporter complex PstSACB involved in phosphate import                                                                                                                                   |
| P | Q74KF9 | DE | ABC phosphate transporter 1;                                                                                                                                                                               |
| P | Q74KF9 | DE | Phosphate import ATP-binding protein PstB 1;                                                                                                                                                               |
| P | Q74KF9 | DE | Phosphate-transporting ATPase 1;                                                                                                                                                                           |
| P | Q74KF9 | DR | inorganic phosphate transmembrane transporter activity                                                                                                                                                     |
| P | Q74KF9 | DR | phosphate transmembrane-transporting ATPase activity                                                                                                                                                       |
| P | Q74LN2 | CC | Transport of potassium into the cell (By similarity).                                                                                                                                                      |
| P | Q74LN2 | DE | Probable potassium transport system protein kup 2;                                                                                                                                                         |
| P | Q74LN2 | DR | potassium ion transmembrane transporter activity                                                                                                                                                           |
| P | Q74LN3 | CC | Transport of potassium into the cell (By similarity).                                                                                                                                                      |
| P | Q74LN3 | DE | Probable potassium transport system protein kup 1;                                                                                                                                                         |
| P | Q74LN3 | DR | potassium ion transmembrane transporter activity                                                                                                                                                           |
| P | Q74LQ3 | DR | phosphonate transmembrane-transporting ATPase activity                                                                                                                                                     |
| P | Q74R28 | DR | glycerol-3-phosphate-transporting ATPase activity                                                                                                                                                          |
| P | Q74RF8 | DE | Maltose transport system permease protein malG;                                                                                                                                                            |
| P | Q74RF9 | DE | Maltose transport system permease protein malF;                                                                                                                                                            |
| P | Q74U12 | CC | Na <sup>+</sup> /H <sup>+</sup> antiporter that extrudes sodium in exchange for external protons (By similarity)                                                                                           |
| P | Q74U12 | DE | Na <sup>+</sup> /H <sup>+</sup> antiporter nhaB;                                                                                                                                                           |
| P | Q74U12 | DE | Sodium/proton antiporter nhaB;                                                                                                                                                                             |
| P | Q74U12 | DR | sodium:hydrogen antiporter activity                                                                                                                                                                        |
| P | Q75G84 | CC | High-affinity potassium transporter (By similarity).                                                                                                                                                       |
| P | Q75G84 | DE | Potassium transporter 21;                                                                                                                                                                                  |
| P | Q75G84 | DR | potassium ion transmembrane transporter activity                                                                                                                                                           |
| P | Q75JF3 | CC | Chloride channels may have several functions including the regulation of cell volume, membrane potential stabilization and signal transduction (By similarity).                                            |
| P | Q75JF3 | CC | Voltage-gated chloride channel                                                                                                                                                                             |
| P | Q75JF3 | DE | Chloride channel protein C;                                                                                                                                                                                |
| P | Q75JF3 | DR | voltage-gated chloride channel activity                                                                                                                                                                    |
| P | Q75N73 | DE | Zinc transporter ZIP14;                                                                                                                                                                                    |
| P | Q75N73 | DR | zinc ion transmembrane transporter activity                                                                                                                                                                |
| P | Q769E5 | CC | Translocates Ca <sup>2+</sup> and other metal ions into vacuoles using the proton gradient formed by H <sup>+</sup> -ATPase and H <sup>+</sup> -pyrophosphatase.                                           |
| P | Q769E5 | DE | Ca <sup>2+</sup> /H <sup>+</sup> exchanger 1a;                                                                                                                                                             |
| P | Q78IQ7 | CC | Plays an important role in cellular zinc homeostasis as a zinc transporter                                                                                                                                 |
| P | Q78IQ7 | CC | Regulated in response to zinc availability.                                                                                                                                                                |
| P | Q78IQ7 | DE | Zinc transporter ZIP4;                                                                                                                                                                                     |
| P | Q78IQ7 | DR | zinc ion transmembrane transporter activity                                                                                                                                                                |
| P | Q795M8 | DE | Putative potassium channel protein yugO;                                                                                                                                                                   |
| P | Q795M8 | DR | voltage-gated potassium channel activity                                                                                                                                                                   |
| P | Q79VE0 | DE | Choline-glycine betaine transporter and EctP protein;                                                                                                                                                      |
| P | Q79VE0 | DE | Ectoine/proline/glycine betaine carrier EctP;                                                                                                                                                              |
| P | Q79VE0 | DE | Ectoine/proline/glycine betaine carrier EctP;                                                                                                                                                              |
| P | Q7A3E6 | CC | Involved in copper export (By similarity).                                                                                                                                                                 |
| P | Q7A3E6 | DE | Copper-exporting P-type ATPase A;                                                                                                                                                                          |
| P | Q7A3E6 | DR | copper-exporting ATPase activity                                                                                                                                                                           |
| P | Q7A3G4 | DR | glucose transmembrane transporter activity                                                                                                                                                                 |
| P | Q7A3U8 | CC | Also possibly involved in excretion of nitrite produced by the dissimilatory reduction of nitrate (By similarity).                                                                                         |
| P | Q7A3U8 | CC | Probably required for nitrate uptake under anoxic conditions                                                                                                                                               |
| P | Q7A3U8 | DE | Probable nitrate transporter narT;                                                                                                                                                                         |
| P | Q7A4B3 | CC | This system is involved in mannitol transport.                                                                                                                                                             |
| P | Q7A4B3 | DE | Mannitol permease IIC component;                                                                                                                                                                           |
| P | Q7A4B3 | DE | Mannitol-specific phosphotransferase enzyme IIB component;                                                                                                                                                 |
| P | Q7A4B3 | DE | PTS system mannitol-specific EIIB component;                                                                                                                                                               |
| P | Q7A4B3 | DE | PTS system mannitol-specific EIIC component;                                                                                                                                                               |
| P | Q7A4B3 | DE | PTS system mannitol-specific EIICB component;                                                                                                                                                              |
| P | Q7A4G4 | CC | One of the components of the high-affinity ATP-driven potassium transport (or KDP) system, which catalyzes the hydrolysis of ATP coupled with the exchange of hydrogen and potassium ions (By similarity). |

|   |        |    |                                                                                                                                                                                           |
|---|--------|----|-------------------------------------------------------------------------------------------------------------------------------------------------------------------------------------------|
| P | Q7A4G4 | DE | Potassium-binding and translocating subunit A 1;                                                                                                                                          |
| P | Q7A4G4 | DE | Potassium-translocating ATPase A chain 1;                                                                                                                                                 |
| P | Q7A4G4 | DE | Potassium-transporting ATPase A chain 1;                                                                                                                                                  |
| P | Q7A4G4 | DR | potassium-transporting ATPase activity<br>mediates the transport of the dicarboxylates fumarate, malate, and succinate                                                                    |
| P | Q7A4P8 | CC | across the cytoplasmic membrane via a Na <sup>+</sup> - electrochemical gradient (By similarity)                                                                                          |
| P | Q7A4P8 | DE | Na <sup>+</sup> /dicarboxylate symporter;                                                                                                                                                 |
| P | Q7A4P8 | DE | Na <sup>+</sup> /dicarboxylate symporter;                                                                                                                                                 |
| P | Q7A4P8 | DE | Sodium-dependent dicarboxylate transporter sdcS;                                                                                                                                          |
| P | Q7A4P8 | DE | Sodium-dependent dicarboxylate transporter sdcS;                                                                                                                                          |
| P | Q7A4Q7 | CC | Catalyzes the sodium-dependent uptake of extracellular L-proline (By similarity)                                                                                                          |
| P | Q7A4Q7 | CC | Since most S.aureus strains are L- proline auxotrophs, this transporter may aid the bacterial persistence during an infection of tissues with low proline concentrations (By similarity). |
| P | Q7A4Q7 | DE | Proline permease;                                                                                                                                                                         |
| P | Q7A4Q7 | DE | Sodium/proline symporter;                                                                                                                                                                 |
| P | Q7A4Q7 | DE | Sodium/proline symporter;                                                                                                                                                                 |
| P | Q7A4Q7 | DR | proline:sodium symporter activity                                                                                                                                                         |
| P | Q7A4Q7 | DR | proline:sodium symporter activity                                                                                                                                                         |
| P | Q7A5Q2 | CC | Part of the ABC transporter complex pstSACB involved in phosphate import (By similarity).                                                                                                 |
| P | Q7A5Q2 | DE | Phosphate-binding protein pstS;                                                                                                                                                           |
| P | Q7A5Q6 | CC | Part of a transport system that may be involved in oligopeptide uptake                                                                                                                    |
| P | Q7A5Q6 | DE | Putative oligopeptide transport system permease protein oppB2;                                                                                                                            |
| P | Q7A5Q7 | CC | Part of a transport system that may be involved in oligopeptide uptake                                                                                                                    |
| P | Q7A5Q7 | DE | Putative oligopeptide transport system permease protein oppC2;                                                                                                                            |
| P | Q7A5Q8 | CC | Part of a transport system that may be involved in oligopeptide uptake                                                                                                                    |
| P | Q7A5Q8 | DE | Putative oligopeptide transport ATP-binding protein oppD2;                                                                                                                                |
| P | Q7A5Q9 | CC | Part of a transport system that may be involved in oligopeptide uptake                                                                                                                    |
| P | Q7A5Q9 | DE | Putative oligopeptide transport ATP-binding protein oppF2;                                                                                                                                |
| P | Q7A679 | CC | part of the ABC transporter complex FOAABC involved in                                                                                                                                    |
| P | Q7A679 | CC | part of the ABC transporter complex FOAABC involved in                                                                                                                                    |
| P | Q7A679 | DE | spermidine/putrescine import                                                                                                                                                              |
| P | Q7A679 | DE | Spermidine/putrescine import ATP-binding protein PotA;                                                                                                                                    |
| P | Q7A679 | DE | Spermidine/putrescine import ATP-binding protein PotA;                                                                                                                                    |
| P | Q7A6M2 | CC | Part of the ABC transporter complex MetNIQ involved in methionine import                                                                                                                  |
| P | Q7A6M2 | DE | Methionine import ATP-binding protein MetN 2;                                                                                                                                             |
| P | Q7A771 | CC | May be a proton symporter involved in the uptake of osmolytes such as proline and glycine betaine (By similarity).                                                                        |
| P | Q7A771 | DE | Putative proline/betaine transporter;                                                                                                                                                     |
| P | Q7A771 | DE | Putative proline/betaine transporter;                                                                                                                                                     |
| P | Q7A7E3 | CC | Part of the ABC transporter complex MetNIQ involved in methionine import                                                                                                                  |
| P | Q7A7E3 | DE | Methionine import ATP-binding protein MetN 1;                                                                                                                                             |
| P | Q7A807 | CC | This system is involved in glucose transport (By similarity).                                                                                                                             |
| P | Q7A807 | DE | Glucose permease IIC component;                                                                                                                                                           |
| P | Q7A807 | DE | Glucose-specific phosphotransferase enzyme IIA component;                                                                                                                                 |
| P | Q7A807 | DE | Glucose-specific phosphotransferase enzyme IIB component;                                                                                                                                 |
| P | Q7A807 | DE | PTS system glucose-specific EIIA component;                                                                                                                                               |
| P | Q7A807 | DE | PTS system glucose-specific EIIB component;                                                                                                                                               |
| P | Q7A807 | DE | PTS system glucose-specific EIIC component;                                                                                                                                               |
| P | Q7A807 | DE | PTS system glucose-specific EIICBA component;                                                                                                                                             |
| P | Q7A807 | DR | glucose transmembrane transporter activity                                                                                                                                                |
| P | Q7A848 | DR | phosphonate transmembrane-transporting ATPase activity                                                                                                                                    |
| P | Q7A937 | DE | Maltose transport system permease protein malF;                                                                                                                                           |
| P | Q7C1M3 | CC | Part of the ABC transporter complex BtuCDF involved in vitamin B12 import                                                                                                                 |
| P | Q7C1M3 | DE | Vitamin B12 import ATP-binding protein BtuD;                                                                                                                                              |
| P | Q7C1M3 | DE | Vitamin B12-transporting ATPase;                                                                                                                                                          |
| P | Q7C1M5 | CC | Part of the ABC transporter complex BtuCDF involved in vitamin B12 import                                                                                                                 |
| P | Q7C1M5 | DE | Vitamin B12 import system permease protein BtuC;                                                                                                                                          |
| P | Q7CCJ4 | CC | This system is involved in glucose transport (By similarity).                                                                                                                             |
| P | Q7CCJ4 | DE | Glucose permease IIC component;                                                                                                                                                           |
| P | Q7CCJ4 | DE | Glucose-specific phosphotransferase enzyme IIA component;                                                                                                                                 |
| P | Q7CCJ4 | DE | Glucose-specific phosphotransferase enzyme IIB component;                                                                                                                                 |
| P | Q7CCJ4 | DE | PTS system glucose-specific EIIA component;                                                                                                                                               |
| P | Q7CCJ4 | DE | PTS system glucose-specific EIIB component;                                                                                                                                               |
| P | Q7CCJ4 | DE | PTS system glucose-specific EIIC component;                                                                                                                                               |

|   |        |    |                                                                                                                                       |
|---|--------|----|---------------------------------------------------------------------------------------------------------------------------------------|
| P | Q7CCJ4 | DE | PTS system glucose-specific EIICBA component;                                                                                         |
| P | Q7CCJ4 | DR | glucose transmembrane transporter activity                                                                                            |
| P | Q7CFR2 | CC | Part of the ABC transporter complex XylFGH involved in xylose import                                                                  |
| P | Q7CFR2 | DE | Xylose import ATP-binding protein XylG;                                                                                               |
| P | Q7CFR2 | DR | D-xylose-importing ATPase activity                                                                                                    |
| P | Q7CG00 | CC | Part of the ABC transporter complex RbsABCD involved in ribose import                                                                 |
| P | Q7CG00 | DE | Ribose import ATP-binding protein RbsA;                                                                                               |
| P | Q7CG77 | CC | Na <sup>+</sup> /H <sup>+</sup> antiporter that extrudes sodium in exchange for external protons (By similarity)                      |
| P | Q7CG77 | DE | Na <sup>+</sup> /H <sup>+</sup> antiporter nhaA;                                                                                      |
| P | Q7CG77 | DE | Sodium/proton antiporter nhaA;                                                                                                        |
| P | Q7CHF8 | CC | Part of the ABC transporter complex MetNIQ involved in methionine import                                                              |
| P | Q7CHF8 | DE | Methionine import ATP-binding protein MetN 2;                                                                                         |
| P | Q7CHQ3 | CC | Part of the ABC transporter complex MglABC involved in galactose/methyl galactoside import                                            |
| P | Q7CHQ3 | DE | Galactose/methyl galactoside import ATP-binding protein MglA;                                                                         |
| P | Q7CQ74 | DE | putative ABC-type dipeptide/oligopeptide/micelle transport systems, permease component;                                               |
| P | Q7DM58 | DE | ATP-energized glutathione S-conjugate pump 4;                                                                                         |
| P | Q7DM58 | DE | Glutathione S-conjugate-transporting ATPase 4;                                                                                        |
| P | Q7EYH7 | CC | Aquaporins facilitate the transport of water and small neutral solutes across cell membranes (By similarity).                         |
| P | Q7GB25 | CC | Pump for glutathione S-conjugates                                                                                                     |
| P | Q7GB25 | DE | ATP-energized glutathione S-conjugate pump 5;                                                                                         |
| P | Q7GB25 | DE | Glutathione S-conjugate-transporting ATPase 5;                                                                                        |
| P | Q7M816 | CC | Part of the ABC transporter complex MetNIQ involved in methionine import                                                              |
| P | Q7M816 | DE | Methionine import ATP-binding protein MetN;                                                                                           |
| P | Q7M8M4 | DR | phosphonate transmembrane-transporting ATPase activity                                                                                |
| P | Q7M922 | CC | Na <sup>+</sup> /H <sup>+</sup> antiporter that extrudes sodium in exchange for external protons (By similarity)                      |
| P | Q7M922 | DE | Na <sup>+</sup> /H <sup>+</sup> antiporter nhaA;                                                                                      |
| P | Q7M922 | DE | Sodium/proton antiporter nhaA;                                                                                                        |
| P | Q7M9C0 | CC | Mediates influx of magnesium ions (By similarity).                                                                                    |
| P | Q7M9C0 | DE | Magnesium transport protein CorA;                                                                                                     |
| P | Q7M9C0 | DR | cobalt ion transmembrane transporter activity                                                                                         |
| P | Q7M9C0 | DR | magnesium ion transmembrane transporter activity                                                                                      |
| P | Q7M9G3 | CC | Part of the ABC transporter complex PstSACB involved in phosphate import                                                              |
| P | Q7M9G3 | DE | ABC phosphate transporter;                                                                                                            |
| P | Q7M9G3 | DE | Phosphate import ATP-binding protein PstB;                                                                                            |
| P | Q7M9G3 | DE | Phosphate-transporting ATPase;                                                                                                        |
| P | Q7M9G3 | DR | inorganic phosphate transmembrane transporter activity                                                                                |
| P | Q7M9G3 | DR | phosphate transmembrane-transporting ATPase activity                                                                                  |
| P | Q7MDF0 | CC | Functions as antiport system and exchanges two chloride ions for 1 proton                                                             |
| P | Q7MDF0 | CC | Proton-coupled chloride transporter                                                                                                   |
| P | Q7MDF0 | DR | voltage-gated chloride channel activity                                                                                               |
| P | Q7ME63 | CC | Part of the ABC transporter complex ModABC involved in molybdenum import                                                              |
| P | Q7ME63 | DE | Molybdenum import ATP-binding protein ModC;                                                                                           |
| P | Q7ME63 | DR | molybdenum ion transmembrane transporter activity                                                                                     |
| P | Q7MEV1 | CC | Part of the ABC transporter complex RbsABCD involved in ribose import                                                                 |
| P | Q7MEV1 | DE | Ribose import ATP-binding protein RbsA;                                                                                               |
| P | Q7MFA1 | CC | Part of the ABC transporter complex HmuTUV involved in hemin import                                                                   |
| P | Q7MFA1 | DE | Hemin import ATP-binding protein HmuV;                                                                                                |
| P | Q7MFC1 | DE | Maltose transport system permease protein malG;                                                                                       |
| P | Q7MFC2 | DE | Maltose transport system permease protein malF;                                                                                       |
| P | Q7MFC4 | CC | part of the ABC transporter complex MalEFGK involved in maltose/maltodextrin import                                                   |
| P | Q7MFC4 | CC | Part of the ABC transporter complex MalEFGK involved in maltose/maltodextrin import                                                   |
| P | Q7MFC4 | DE | Maltose/maltodextrin import ATP-binding protein MalK;                                                                                 |
| P | Q7MFC4 | DE | Maltose/maltodextrin import ATP-binding protein MalK;                                                                                 |
| P | Q7MFC4 | DR | maltose-transporting ATPase activity                                                                                                  |
| P | Q7MFE8 | CC | Part of the ABC transporter complex PstSACB involved in phosphate import                                                              |
| P | Q7MFE8 | DE | ABC phosphate transporter 2;                                                                                                          |
| P | Q7MFE8 | DE | Phosphate import ATP-binding protein PstB 2;                                                                                          |
| P | Q7MFE8 | DE | Phosphate-transporting ATPase 2;                                                                                                      |
| P | Q7MFE8 | DR | inorganic phosphate transmembrane transporter activity                                                                                |
| P | Q7MFE8 | DR | phosphate transmembrane-transporting ATPase activity                                                                                  |
| P | Q7MGA3 | CC | Involved in the import of serine and threonine into the cell, with the concomitant import of sodium (symport system) (By similarity). |
| P | Q7MGA3 | DE | Na <sup>+</sup> /serine-threonine symporter;                                                                                          |

|   |        |    |                                                                                                                                                                                         |
|---|--------|----|-----------------------------------------------------------------------------------------------------------------------------------------------------------------------------------------|
| P | Q7MGA3 | DR | sodium:dicarboxylate symporter activity                                                                                                                                                 |
| P | Q7MGA3 | DR | sodium:dicarboxylate symporter activity                                                                                                                                                 |
| P | Q7MIR0 | CC | Part of the ABC transporter complex CcmAB involved in the biogenesis of c-type cytochromes; once thought to export heme, this seems not to be the case, but its exact role is uncertain |
| P | Q7MIR0 | DE | Heme exporter protein A;                                                                                                                                                                |
| P | Q7MIR0 | DR | heme-transporting ATPase activity                                                                                                                                                       |
| P | Q7MIV9 | CC | Channel that permits osmotically driven movement of water in both directions                                                                                                            |
| P | Q7MIV9 | CC | It mediates rapid entry or exit of water in response to abrupt changes in osmolarity (By similarity).                                                                                   |
| P | Q7MJ01 | DE | Lipoprotein-releasing system ATP-binding protein LolD;                                                                                                                                  |
| P | Q7MJ01 | DR | lipoprotein transporter activity                                                                                                                                                        |
| P | Q7MKU3 | CC | Part of the ABC transporter complex PotABCD involved in spermidine/putrescine import                                                                                                    |
| P | Q7MKU3 | CC | Part of the ABC transporter complex PotABCD involved in spermidine/putrescine import                                                                                                    |
| P | Q7MKU3 | DE | Spermidine/putrescine import ATP-binding protein PotA;                                                                                                                                  |
| P | Q7MKU3 | DE | Spermidine/putrescine import ATP-binding protein PotA;                                                                                                                                  |
| P | Q7MLB8 | DR | glycerol-3-phosphate-transporting ATPase activity                                                                                                                                       |
| P | Q7MLE6 | CC | Part of the ABC transporter complex BtuCDF involved in vitamin B12 import                                                                                                               |
| P | Q7MLE6 | DE | Vitamin B12 import ATP-binding protein BtuD;                                                                                                                                            |
| P | Q7MLE6 | DE | Vitamin B12-transporting ATPase;                                                                                                                                                        |
| P | Q7MLE7 | CC | Part of the ABC transporter complex BtuCDF involved in vitamin B12 import                                                                                                               |
| P | Q7MLE7 | DE | Vitamin B12 import system permease protein BtuC;                                                                                                                                        |
| P | Q7MLJ3 | CC | Na <sup>+</sup> /H <sup>+</sup> antiporter that extrudes sodium in exchange for external protons (By similarity)                                                                        |
| P | Q7MLJ3 | DE | Na <sup>+</sup> /H <sup>+</sup> antiporter nhaA;                                                                                                                                        |
| P | Q7MLJ3 | DE | Sodium/proton antiporter nhaA;                                                                                                                                                          |
| P | Q7MMN0 | CC | Part of the ABC transporter complex ZnuABC involved in zinc import                                                                                                                      |
| P | Q7MMN0 | DE | Zinc import ATP-binding protein ZnuC;                                                                                                                                                   |
| P | Q7MMN0 | DR | zinc transporting ATPase activity                                                                                                                                                       |
| P | Q7MN25 | CC | Part of the ABC transporter complex MetNIQ involved in methionine import                                                                                                                |
| P | Q7MN25 | DE | Methionine import ATP-binding protein MetN;                                                                                                                                             |
| P | Q7MN25 | DR | D-methionine transmembrane transporter activity                                                                                                                                         |
| P | Q7MNI7 | CC | Part of the ABC transporter complex PstSACB involved in phosphate import                                                                                                                |
| P | Q7MNI7 | DE | ABC phosphate transporter 1;                                                                                                                                                            |
| P | Q7MNI7 | DE | Phosphate import ATP-binding protein PstB 1;                                                                                                                                            |
| P | Q7MNI7 | DE | Phosphate-transporting ATPase 1;                                                                                                                                                        |
| P | Q7MNI7 | DR | inorganic phosphate transmembrane transporter activity                                                                                                                                  |
| P | Q7MNI7 | DR | phosphate transmembrane-transporting ATPase activity                                                                                                                                    |
| P | Q7MNT2 | CC | Binds vitamin B12 and delivers it to the periplasmic surface of BtuC (By similarity)                                                                                                    |
| P | Q7MNT2 | CC | Part of the ABC transporter complex BtuCDF involved in vitamin B12 import                                                                                                               |
| P | Q7MPC5 | CC | Part of the ABC transporter complex ThiBPQ involved in thiamine import                                                                                                                  |
| P | Q7MPC5 | DE | Thiamine import ATP-binding protein ThiQ;                                                                                                                                               |
| P | Q7MYP0 | CC | Mediates influx of magnesium ions (By similarity).                                                                                                                                      |
| P | Q7MYP0 | DE | Magnesium transport protein CorA;                                                                                                                                                       |
| P | Q7MYP0 | DR | cobalt ion transmembrane transporter activity                                                                                                                                           |
| P | Q7MYP0 | DR | magnesium ion transmembrane transporter activity                                                                                                                                        |
| P | Q7N0A2 | CC | Involved in the import of serine and threonine into the cell, with the concomitant import of sodium (symport system) (By similarity).                                                   |
| P | Q7N0A2 | DE | Na <sup>+</sup> /serine-threonine symporter;                                                                                                                                            |
| P | Q7N0A2 | DR | sodium:dicarboxylate symporter activity                                                                                                                                                 |
| P | Q7N0A2 | DR | sodium:dicarboxylate symporter activity                                                                                                                                                 |
| P | Q7N183 | CC | Important to control the intracellular level of arginine and the correct balance between arginine and lysine (By similarity).                                                           |
| P | Q7N3A6 | DE | Lipoprotein-releasing system ATP-binding protein LolD;                                                                                                                                  |
| P | Q7N3A6 | DR | lipoprotein transporter activity                                                                                                                                                        |
| P | Q7N3Q3 | CC | Part of the ABC transporter complex BtuCDF involved in vitamin B12 import                                                                                                               |
| P | Q7N3Q3 | DE | Vitamin B12 import system permease protein BtuC;                                                                                                                                        |
| P | Q7N3Q4 | CC | Part of the ABC transporter complex BtuCDF involved in vitamin B12 import                                                                                                               |
| P | Q7N3Q4 | DE | Vitamin B12 import ATP-binding protein BtuD;                                                                                                                                            |
| P | Q7N3Q4 | DE | Vitamin B12-transporting ATPase;                                                                                                                                                        |
| P | Q7N3S7 | CC | Part of the ABC transporter complex HmuTUV involved in hemin import                                                                                                                     |
| P | Q7N3S7 | DE | Hemin import ATP-binding protein HmuV;                                                                                                                                                  |
| P | Q7N3Z4 | CC | Na <sup>+</sup> /H <sup>+</sup> antiporter that extrudes sodium in exchange for external protons (By similarity)                                                                        |
| P | Q7N3Z4 | DE | Na <sup>+</sup> /H <sup>+</sup> antiporter nhaB;                                                                                                                                        |
| P | Q7N3Z4 | DE | Sodium/proton antiporter nhaB;                                                                                                                                                          |
| P | Q7N3Z4 | DR | sodium:hydrogen antiporter activity                                                                                                                                                     |

|   |        |    |                                                                                                                                                                                                            |
|---|--------|----|------------------------------------------------------------------------------------------------------------------------------------------------------------------------------------------------------------|
| P | Q7N545 | CC | Part of the ABC transporter complex ZnuABC involved in zinc import                                                                                                                                         |
| P | Q7N545 | DE | Zinc import ATP-binding protein ZnuC;                                                                                                                                                                      |
| P | Q7N545 | DR | zinc transporting ATPase activity                                                                                                                                                                          |
| P | Q7N5C1 | CC | Channel that permits osmotically driven movement of water in both directions                                                                                                                               |
| P | Q7N5C1 | CC | It mediates rapid entry or exit of water in response to abrupt changes in osmolarity (By similarity).                                                                                                      |
| P | Q7N6R3 | CC | Part of the ABC transporter complex ModABC involved in molybdenum import                                                                                                                                   |
| P | Q7N6R3 | DE | Molybdenum import ATP-binding protein ModC;                                                                                                                                                                |
| P | Q7N6R3 | DR | molybdenum ion transmembrane transporter activity                                                                                                                                                          |
| P | Q7N6W5 | CC | One of the components of the high-affinity ATP-driven potassium transport (or KDP) system, which catalyzes the hydrolysis of ATP coupled with the exchange of hydrogen and potassium ions (By similarity). |
| P | Q7N6W5 | DE | Potassium-binding and translocating subunit A;                                                                                                                                                             |
| P | Q7N6W5 | DE | Potassium-translocating ATPase A chain;                                                                                                                                                                    |
| P | Q7N6W5 | DE | Potassium-transporting ATPase A chain;                                                                                                                                                                     |
| P | Q7N6W5 | DR | potassium-transporting ATPase activity                                                                                                                                                                     |
| P | Q7N6W6 | CC | One of the components of the high-affinity ATP-driven potassium transport (or KDP) system, which catalyzes the hydrolysis of ATP coupled with the exchange of hydrogen and potassium ions (By similarity). |
| P | Q7N6W6 | DE | Potassium-binding and translocating subunit B;                                                                                                                                                             |
| P | Q7N6W6 | DE | Potassium-translocating ATPase B chain;                                                                                                                                                                    |
| P | Q7N6W6 | DE | Potassium-transporting ATPase B chain;                                                                                                                                                                     |
| P | Q7N6W6 | DR | potassium-transporting ATPase activity                                                                                                                                                                     |
| P | Q7N6W7 | CC | One of the components of the high-affinity ATP-driven potassium transport (or KDP) system, which catalyzes the hydrolysis of ATP coupled with the exchange of hydrogen and potassium ions                  |
| P | Q7N6W7 | DE | Potassium-binding and translocating subunit C;                                                                                                                                                             |
| P | Q7N6W7 | DE | Potassium-translocating ATPase C chain;                                                                                                                                                                    |
| P | Q7N6W7 | DE | Potassium-transporting ATPase C chain;                                                                                                                                                                     |
| P | Q7N6W7 | DR | potassium-transporting ATPase activity                                                                                                                                                                     |
| P | Q7N6Z2 | CC | Part of the ABC transporter complex CysAW involved in sulfate/thiosulfate import                                                                                                                           |
| P | Q7N6Z2 | CC | Part of the ABC transporter complex CysAW involved in sulfate/thiosulfate import                                                                                                                           |
| P | Q7N6Z2 | DE | Sulfate-transporting ATPase;                                                                                                                                                                               |
| P | Q7N6Z2 | DE | Sulfate/thiosulfate import ATP-binding protein CysA;                                                                                                                                                       |
| P | Q7N6Z2 | DE | Sulfate/thiosulfate import ATP-binding protein CysA;                                                                                                                                                       |
| P | Q7N6Z2 | DR | sulfate transmembrane-transporting ATPase activity                                                                                                                                                         |
| P | Q7N842 | CC | Binds vitamin B12 and delivers it to the periplasmic surface of BtuC (By similarity)                                                                                                                       |
| P | Q7N842 | CC | Part of the ABC transporter complex BtuCDF involved in vitamin B12 import                                                                                                                                  |
| P | Q7N8M2 | CC | Part of the ABC transporter complex MetNIQ involved in methionine import                                                                                                                                   |
| P | Q7N8M2 | DE | Methionine import ATP-binding protein MetN;                                                                                                                                                                |
| P | Q7N8M2 | DR | D-methionine transmembrane transporter activity                                                                                                                                                            |
| P | Q7N8V0 | CC | Part of the ABC transporter complex ThiBPQ involved in thiamine import                                                                                                                                     |
| P | Q7N8V0 | DE | Thiamine import ATP-binding protein ThiQ;                                                                                                                                                                  |
| P | Q7N8X6 | CC | Na <sup>+</sup> /H <sup>+</sup> antiporter that excludes sodium in exchange for external protons (By similarity)                                                                                           |
| P | Q7N8X6 | DE | Na <sup>+</sup> /H <sup>+</sup> antiporter nhaA;                                                                                                                                                           |
| P | Q7N8X6 | DE | Sodium/proton antiporter nhaA;                                                                                                                                                                             |
| P | Q7N983 | DE | Maltose transport system permease protein malG;                                                                                                                                                            |
| P | Q7N984 | DE | Maltose transport system permease protein malF;                                                                                                                                                            |
| P | Q7N986 | CC | Part of the ABC transporter complex MalEFG involved in maltose/maltodextrin import                                                                                                                         |
| P | Q7N986 | CC | Part of the ABC transporter complex MalEFG involved in maltose/maltodextrin import                                                                                                                         |
| P | Q7N986 | DE | Maltose/maltodextrin import ATP-binding protein MalK;                                                                                                                                                      |
| P | Q7N986 | DE | Maltose/maltodextrin import ATP-binding protein MalK;                                                                                                                                                      |
| P | Q7N986 | DR | maltose-transporting ATPase activity                                                                                                                                                                       |
| P | Q7N9U4 | CC | Part of the ABC transporter complex PstSACB involved in phosphate import                                                                                                                                   |
| P | Q7N9U4 | DE | ABC phosphate transporter;                                                                                                                                                                                 |
| P | Q7N9U4 | DE | Phosphate import ATP-binding protein PstB;                                                                                                                                                                 |
| P | Q7N9U4 | DE | Phosphate-transporting ATPase;                                                                                                                                                                             |
| P | Q7N9U4 | DR | inorganic phosphate transmembrane transporter activity                                                                                                                                                     |
| P | Q7N9U4 | DR | phosphate transmembrane-transporting ATPase activity                                                                                                                                                       |
| P | Q7NA79 | CC | Part of the ABC transporter complex RbsABCD involved in ribose import                                                                                                                                      |
| P | Q7NA79 | DE | Ribose import ATP-binding protein RbsA;                                                                                                                                                                    |
| P | Q7NB11 | CC | Part of the ABC transporter complex PotABCD involved in spermidine/putrescine import                                                                                                                       |
| P | Q7NB11 | CC | Part of the ABC transporter complex PotABCD involved in spermidine/putrescine import                                                                                                                       |
| P | Q7NB11 | DE | Spermidine/putrescine import ATP-binding protein PotA;                                                                                                                                                     |
| P | Q7NB11 | DE | Spermidine/putrescine import ATP-binding protein PotA;                                                                                                                                                     |

|   |        |    |                                                                                                                                                  |
|---|--------|----|--------------------------------------------------------------------------------------------------------------------------------------------------|
| P | Q7NC40 | CC | Part of the ABC transporter complex PstSACB involved in phosphate import                                                                         |
| P | Q7NC40 | DE | ABC phosphate transporter;                                                                                                                       |
| P | Q7NC40 | DE | Phosphate import ATP-binding protein PstB;                                                                                                       |
| P | Q7NC40 | DE | Phosphate-transporting ATPase;                                                                                                                   |
| P | Q7NC40 | DR | inorganic phosphate transmembrane transporter activity                                                                                           |
| P | Q7NC40 | DR | phosphate transmembrane-transporting ATPase activity                                                                                             |
| P | Q7NIW1 | CC | Part of the ABC transporter complex CysAW 11 involved in sulfate/thiosulfate import                                                              |
| P | Q7NIW1 | DE | Sulfate-transporting ATPase;                                                                                                                     |
| P | Q7NIW1 | DE | Sulfate/thiosulfate import ATP-binding protein CysA;                                                                                             |
| P | Q7NIW1 | DR | sulfate transmembrane-transporting ATPase activity                                                                                               |
| P | Q7NN36 | CC | Part of the ABC transporter complex HmuTUV involved in hemin import                                                                              |
| P | Q7NN36 | DE | Hemin import ATP-binding protein HmuV;                                                                                                           |
| P | Q7NNG3 | CC | Part of the ABC transporter complex PstSACB involved in phosphate import                                                                         |
| P | Q7NNG3 | DE | ABC phosphate transporter 2;                                                                                                                     |
| P | Q7NNG3 | DE | Phosphate import ATP-binding protein PstB 2;                                                                                                     |
| P | Q7NNG3 | DE | Phosphate-transporting ATPase 2;                                                                                                                 |
| P | Q7NNG3 | DR | inorganic phosphate transmembrane transporter activity                                                                                           |
| P | Q7NNG3 | DR | phosphate transmembrane-transporting ATPase activity                                                                                             |
| P | Q7NNP3 | CC | Channel that permits osmotically driven movement of water in both directions                                                                     |
| P | Q7NNP3 | CC | It mediates rapid entry or exit of water in response to abrupt changes in osmolarity (By similarity).                                            |
| P | Q7NPP4 | CC | Part of the ABC transporter complex PstSACB involved in phosphate import                                                                         |
| P | Q7NPP4 | DE | ABC phosphate transporter 1;                                                                                                                     |
| P | Q7NPP4 | DE | Phosphate import ATP-binding protein PstB 1;                                                                                                     |
| P | Q7NPP4 | DE | Phosphate-transporting ATPase 1;                                                                                                                 |
| P | Q7NPP4 | DR | inorganic phosphate transmembrane transporter activity                                                                                           |
| P | Q7NPP4 | DR | phosphate transmembrane-transporting ATPase activity                                                                                             |
| P | Q7RTP0 | CC | Can also transport other divalent cations such as Fe(2+), Sr(2+), Ba(2+), Mn(2+) and Co(2+) but to a much less extent than Mg2+ (By similarity). |
| P | Q7RTP0 | DE | Magnesium transporter NIPA1;                                                                                                                     |
| P | Q7RTX9 | CC | Proton-linked monocarboxylate transporter                                                                                                        |
| P | Q7RTX9 | DE | Monocarboxylate transporter 14;                                                                                                                  |
| P | Q7RTY0 | CC | Proton-linked monocarboxylate transporter                                                                                                        |
| P | Q7RTY0 | DE | Monocarboxylate transporter 13;                                                                                                                  |
| P | Q7RTY1 | CC | Proton-linked monocarboxylate transporter                                                                                                        |
| P | Q7RTY1 | DE | Monocarboxylate transporter 9;                                                                                                                   |
| P | Q7SFQ9 | CC | Mitochondrial inner membrane magnesium transporter required for mitochondrial magnesium homeostasis                                              |
| P | Q7SFQ9 | DE | Mitochondrial inner membrane magnesium transporter mrs2;                                                                                         |
| P | Q7SFQ9 | DR | magnesium ion transmembrane transporter activity                                                                                                 |
| P | Q7TM99 | CC | Proton-linked monocarboxylate transporter                                                                                                        |
| P | Q7TM99 | DE | Monocarboxylate transporter 9;                                                                                                                   |
| P | Q7TNS7 | CC | Probable cation channel with high affinity for sodium.                                                                                           |
| P | Q7TNS7 | DR | sodium channel activity                                                                                                                          |
| P | Q7TSH7 | CC | Putative voltage-gated potassium channel (By similarity).                                                                                        |
| P | Q7TSH7 | DE | Potassium voltage-gated channel subfamily F member 1;                                                                                            |
| P | Q7TSH7 | DE | Voltage-gated potassium channel subunit Kv5.1;                                                                                                   |
| P | Q7TSH7 | DR | voltage-gated potassium channel activity                                                                                                         |
| P | Q7U0Z9 | CC | Part of the ABC transporter complex PstSACB involved in phosphate import                                                                         |
| P | Q7U0Z9 | DE | ABC phosphate transporter 2;                                                                                                                     |
| P | Q7U0Z9 | DE | Phosphate import ATP-binding protein PstB 2;                                                                                                     |
| P | Q7U0Z9 | DE | Phosphate-transporting ATPase 2;                                                                                                                 |
| P | Q7U0Z9 | DR | inorganic phosphate transmembrane transporter activity                                                                                           |
| P | Q7U0Z9 | DR | phosphate transmembrane-transporting ATPase activity                                                                                             |
| P | Q7U172 | CC | Part of the ABC transporter complex PstSACB involved in phosphate import                                                                         |
| P | Q7U172 | DE | ABC phosphate transporter 1;                                                                                                                     |
| P | Q7U172 | DE | Phosphate import ATP-binding protein PstB 1;                                                                                                     |
| P | Q7U172 | DE | Phosphate-transporting ATPase 1;                                                                                                                 |
| P | Q7U172 | DR | inorganic phosphate transmembrane transporter activity                                                                                           |
| P | Q7U172 | DR | phosphate transmembrane-transporting ATPase activity                                                                                             |
| P | Q7U6R4 | CC | Part of the ABC transporter complex PstSACB involved in phosphate import                                                                         |
| P | Q7U6R4 | DE | ABC phosphate transporter;                                                                                                                       |
| P | Q7U6R4 | DE | Phosphate import ATP-binding protein PstB;                                                                                                       |
| P | Q7U6R4 | DE | Phosphate-transporting ATPase;                                                                                                                   |
| P | Q7U6R4 | DR | inorganic phosphate transmembrane transporter activity                                                                                           |



|   |        |    |                                                                                                                                      |
|---|--------|----|--------------------------------------------------------------------------------------------------------------------------------------|
| P | Q7U6R4 | DR | phosphate transmembrane-transporting ATPase activity                                                                                 |
| P | Q7UBD0 | CC | Part of the ABC transporter complex MalEFGK involved in maltose/maltodextrin import                                                  |
| P | Q7UBD0 | CC | Part of the ABC transporter complex MalEFGK involved in maltose/maltodextrin import                                                  |
| P | Q7UBD0 | DE | Maltose/maltodextrin import ATP-binding protein MalK;                                                                                |
| P | Q7UBD0 | DE | Maltose/maltodextrin import ATP-binding protein MalK;                                                                                |
| P | Q7UBD0 | DR | maltose-transporting ATPase activity                                                                                                 |
| P | Q7UBP8 | CC | Important to control the intracellular level of arginine and the correct balance between arginine and lysine (By similarity).        |
| P | Q7UCG7 | CC | The physiological role may be the reduction of the intracellular concentration of toxic sugars or sugar metabolites (By similarity). |
| P | Q7UCG7 | DE | Probable sugar efflux transporter;                                                                                                   |
| P | Q7UP21 | CC | Part of the ABC transporter complex PstSACB involved in phosphate import                                                             |
| P | Q7UP21 | DE | ABC phosphate transporter;                                                                                                           |
| P | Q7UP21 | DE | Phosphate import ATP-binding protein PstB;                                                                                           |
| P | Q7UP21 | DE | Phosphate-transporting ATPase;                                                                                                       |
| P | Q7UP21 | DR | inorganic phosphate transmembrane transporter activity                                                                               |
| P | Q7UP21 | DR | phosphate transmembrane-transporting ATPase activity                                                                                 |
| P | Q7UPK3 | DE | Lipoprotein-releasing system ATP-binding protein LolD 2;                                                                             |
| P | Q7UPK3 | DR | lipoprotein transporter activity                                                                                                     |
| P | Q7UTY3 | CC | Na <sup>+</sup> /H <sup>+</sup> antiporter that extrudes sodium in exchange for external protons (By similarity)                     |
| P | Q7UTY3 | DE | Na <sup>+</sup> /H <sup>+</sup> antiporter nhaA;                                                                                     |
| P | Q7UTY3 | DE | Sodium/proton antiporter nhaA;                                                                                                       |
| P | Q7UU57 | CC | Part of the ABC transporter complex RbsABCD involved in ribose import                                                                |
| P | Q7UU57 | DE | Ribose import ATP-binding protein RbsA;                                                                                              |
| P | Q7UX73 | DE | Lipoprotein-releasing system ATP-binding protein LolD 1;                                                                             |
| P | Q7UX73 | DR | lipoprotein transporter activity                                                                                                     |
| P | Q7V1X3 | CC | Part of the ABC transporter complex PstSACB involved in phosphate import                                                             |
| P | Q7V1X3 | DE | ABC phosphate transporter;                                                                                                           |
| P | Q7V1X3 | DE | Phosphate import ATP-binding protein PstB;                                                                                           |
| P | Q7V1X3 | DE | Phosphate-transporting ATPase;                                                                                                       |
| P | Q7V1X3 | DR | inorganic phosphate transmembrane transporter activity                                                                               |
| P | Q7V1X3 | DR | phosphate transmembrane-transporting ATPase activity                                                                                 |
| P | Q7V7P0 | CC | Part of the ABC transporter complex PstSACB involved in phosphate import                                                             |
| P | Q7V7P0 | DE | ABC phosphate transporter;                                                                                                           |
| P | Q7V7P0 | DE | Phosphate import ATP-binding protein PstB;                                                                                           |
| P | Q7V7P0 | DE | Phosphate-transporting ATPase;                                                                                                       |
| P | Q7V7P0 | DR | inorganic phosphate transmembrane transporter activity                                                                               |
| P | Q7V7P0 | DR | phosphate transmembrane-transporting ATPase activity                                                                                 |
| P | Q7VCZ3 | CC | Part of the ABC transporter complex PstSACB involved in phosphate import                                                             |
| P | Q7VCZ3 | DE | ABC phosphate transporter;                                                                                                           |
| P | Q7VCZ3 | DE | Phosphate import ATP-binding protein PstB;                                                                                           |
| P | Q7VCZ3 | DE | Phosphate-transporting ATPase;                                                                                                       |
| P | Q7VCZ3 | DR | inorganic phosphate transmembrane transporter activity                                                                               |
| P | Q7VCZ3 | DR | phosphate transmembrane-transporting ATPase activity                                                                                 |
| P | Q7VEQ4 | DE | L-asparagine permease 1;                                                                                                             |
| P | Q7VEQ4 | DE | L-asparagine transport protein 1;                                                                                                    |
| P | Q7VFJ7 | CC | Mediates influx of magnesium ions (By similarity).                                                                                   |
| P | Q7VFJ7 | DE | Magnesium transport protein CorA;                                                                                                    |
| P | Q7VFJ7 | DR | cobalt ion transmembrane transporter activity                                                                                        |
| P | Q7VFJ7 | DR | magnesium ion transmembrane transporter activity                                                                                     |
| P | Q7VFN0 | CC | Na <sup>+</sup> /H <sup>+</sup> antiporter that extrudes sodium in exchange for external protons (By similarity)                     |
| P | Q7VFN0 | DE | Na <sup>+</sup> /H <sup>+</sup> antiporter nhaA 2;                                                                                   |
| P | Q7VFN0 | DE | Sodium/proton antiporter nhaA 2;                                                                                                     |
| P | Q7VFN1 | CC | Na <sup>+</sup> /H <sup>+</sup> antiporter that extrudes sodium in exchange for external protons (By similarity)                     |
| P | Q7VFN1 | DE | Na <sup>+</sup> /H <sup>+</sup> antiporter nhaA 1;                                                                                   |
| P | Q7VFN1 | DE | Sodium/proton antiporter nhaA 1;                                                                                                     |
| P | Q7VI92 | CC | Part of the ABC transporter complex MetNIQ involved in methionine import                                                             |
| P | Q7VI92 | DE | Methionine import ATP-binding protein MetN;                                                                                          |
| P | Q7VKP7 | CC | Part of the ABC transporter complex ModABC involved in molybdenum import                                                             |
| P | Q7VKP7 | DE | Molybdenum import ATP-binding protein ModC;                                                                                          |
| P | Q7VKP7 | DR | molybdenum ion transmembrane transporter activity                                                                                    |
| P | Q7VKY3 | CC | Na <sup>+</sup> /H <sup>+</sup> antiporter that extrudes sodium in exchange for external protons (By similarity)                     |
| P | Q7VKY3 | DE | Na <sup>+</sup> /H <sup>+</sup> antiporter nhaB;                                                                                     |
| P | Q7VKY3 | DE | Sodium/proton antiporter nhaB;                                                                                                       |
| P | Q7VKY3 | DR | sodium:hydrogen antiporter activity                                                                                                  |

|   |        |    |                                                                                                                                                                                                            |
|---|--------|----|------------------------------------------------------------------------------------------------------------------------------------------------------------------------------------------------------------|
| P | Q7VLS9 | CC | Part of the ABC transporter complex ZnuABC involved in zinc import                                                                                                                                         |
| P | Q7VLS9 | DE | Zinc import ATP-binding protein ZnuC;                                                                                                                                                                      |
| P | Q7VLS9 | DR | zinc transporting ATPase activity                                                                                                                                                                          |
| P | Q7VLY3 | CC | Involved in the import of serine and threonine into the cell, with the concomitant import of sodium (symport system) (By similarity).                                                                      |
| P | Q7VLY3 | DE | Na <sup>+</sup> /serine-threonine symporter;                                                                                                                                                               |
| P | Q7VLY3 | DR | sodium:dicarboxylate symporter activity                                                                                                                                                                    |
| P | Q7VLY3 | DR | sodium:dicarboxylate symporter activity                                                                                                                                                                    |
| P | Q7VM95 | CC | Part of the ABC transporter complex MetNIQ involved in methionine import                                                                                                                                   |
| P | Q7VM95 | DE | Methionine import ATP-binding protein MetN;                                                                                                                                                                |
| P | Q7VM95 | DR | D-methionine transmembrane transporter activity                                                                                                                                                            |
| P | Q7VMV4 | DE | Lipoprotein-releasing system ATP-binding protein LolD;                                                                                                                                                     |
| P | Q7VMV4 | DR | lipoprotein transporter activity                                                                                                                                                                           |
| P | Q7VN12 | CC | Part of the ABC transporter complex CcmAB involved in the biogenesis of c-type cytochromes; once thought to export heme, this seems not to be the case, but its exact role is uncertain                    |
| P | Q7VN12 | DE | Heme exporter protein A;                                                                                                                                                                                   |
| P | Q7VN12 | DR | heme-transporting ATPase activity                                                                                                                                                                          |
| P | Q7VN39 | CC | Na <sup>+</sup> /H <sup>+</sup> antiporter that excludes sodium in exchange for external protons (By similarity)                                                                                           |
| P | Q7VN39 | DE | Na <sup>+</sup> /H <sup>+</sup> antiporter nhaA;                                                                                                                                                           |
| P | Q7VN39 | DE | Sodium/proton antiporter nhaA;                                                                                                                                                                             |
| P | Q7VN59 | CC | Mediates influx of magnesium ions (By similarity).                                                                                                                                                         |
| P | Q7VN59 | DE | Magnesium transport protein CorA;                                                                                                                                                                          |
| P | Q7VN59 | DR | cobalt ion transmembrane transporter activity                                                                                                                                                              |
| P | Q7VN59 | DR | magnesium ion transmembrane transporter activity                                                                                                                                                           |
| P | Q7VNG4 | CC | Part of the ABC transporter complex PotABCD involved in                                                                                                                                                    |
| P | Q7VNG4 | CC | Part of the ABC transporter complex PotABCD involved in                                                                                                                                                    |
| P | Q7VNG4 | DE | Spermidine/putrescine import ATP-binding protein PotA;                                                                                                                                                     |
| P | Q7VNG4 | DE | Spermidine/putrescine import ATP-binding protein PotA;                                                                                                                                                     |
| P | Q7VP69 | CC | Part of the ABC transporter complex ThiBPQ involved in thiamine import                                                                                                                                     |
| P | Q7VP69 | DE | Thiamine import ATP-binding protein ThiQ;                                                                                                                                                                  |
| P | Q7VR29 | DE | Lipoprotein-releasing system ATP-binding protein LolD;                                                                                                                                                     |
| P | Q7VR29 | DR | lipoprotein transporter activity                                                                                                                                                                           |
| P | Q7VRM7 | CC | Mediates influx of magnesium ions (By similarity).                                                                                                                                                         |
| P | Q7VRM7 | DE | Magnesium transport protein CorA;                                                                                                                                                                          |
| P | Q7VRM7 | DR | cobalt ion transmembrane transporter activity                                                                                                                                                              |
| P | Q7VRM7 | DR | magnesium ion transmembrane transporter activity                                                                                                                                                           |
| P | Q7VTK0 | CC | Transport of potassium into the cell (By similarity).                                                                                                                                                      |
| P | Q7VTK0 | DE | Probable potassium transport system protein kup;                                                                                                                                                           |
| P | Q7VTK0 | DR | potassium ion transmembrane transporter activity                                                                                                                                                           |
| P | Q7VUJ5 | CC | Part of the ABC transporter complex ModABC involved in molybdenum import                                                                                                                                   |
| P | Q7VUJ5 | DE | Molybdenum import ATP-binding protein ModC;                                                                                                                                                                |
| P | Q7VUJ5 | DR | molybdenum ion transmembrane transporter activity                                                                                                                                                          |
| P | Q7VV72 | CC | Part of the ABC transporter complex MetNIQ involved in methionine import                                                                                                                                   |
| P | Q7VV72 | DE | Methionine import ATP-binding protein MetN;                                                                                                                                                                |
| P | Q7VVZ9 | CC | One of the components of the high-affinity ATP-driven potassium transport (or KDP) system, which catalyzes the hydrolysis of ATP coupled with the exchange of hydrogen and potassium ions (By similarity). |
| P | Q7VVZ9 | DE | Potassium-binding and translocating subunit A;                                                                                                                                                             |
| P | Q7VVZ9 | DE | Potassium-translocating ATPase A chain;                                                                                                                                                                    |
| P | Q7VVZ9 | DE | Potassium-transporting ATPase A chain;                                                                                                                                                                     |
| P | Q7VVZ9 | DR | potassium-transporting ATPase activity                                                                                                                                                                     |
| P | Q7VYN2 | DR | glycerol-3-phosphate-transporting ATPase activity                                                                                                                                                          |
| P | Q7VZ31 | DE | Lipoprotein-releasing system ATP-binding protein LolD;                                                                                                                                                     |
| P | Q7VZ31 | DR | lipoprotein transporter activity                                                                                                                                                                           |
| P | Q7VZ66 | CC | Part of the ABC transporter complex PstSACB involved in phosphate import                                                                                                                                   |
| P | Q7VZ66 | DE | ABC phosphate transporter;                                                                                                                                                                                 |
| P | Q7VZ66 | DE | Phosphate import ATP-binding protein PstB;                                                                                                                                                                 |
| P | Q7VZ66 | DE | Phosphate-transporting ATPase;                                                                                                                                                                             |
| P | Q7VZ66 | DR | inorganic phosphate transmembrane transporter activity                                                                                                                                                     |
| P | Q7VZ66 | DR | phosphate transmembrane-transporting ATPase activity                                                                                                                                                       |
| P | Q7VZE5 | CC | Part of the ABC transporter complex CysAW IF involved in sulfate/thiosulfate import                                                                                                                        |
| P | Q7VZE5 | DE | Sulfate-transporting ATPase;                                                                                                                                                                               |
| P | Q7VZE5 | DE | Sulfate/thiosulfate import ATP-binding protein CysA;                                                                                                                                                       |
| P | Q7VZE5 | DR | sulfate transmembrane-transporting ATPase activity                                                                                                                                                         |

|   |        |    |                                                                                                                                                                                                            |
|---|--------|----|------------------------------------------------------------------------------------------------------------------------------------------------------------------------------------------------------------|
| P | Q7W025 | CC | Part of the ABC transporter complex HmuTUV involved in hemin import                                                                                                                                        |
| P | Q7W025 | DE | Hemin import ATP-binding protein HmuV;                                                                                                                                                                     |
| P | Q7W148 | DR | phosphonate transmembrane-transporting ATPase activity                                                                                                                                                     |
| P | Q7W1F4 | CC | Part of the ABC transporter complex ModABC involved in molybdenum import                                                                                                                                   |
| P | Q7W1F4 | DE | Molybdenum import ATP-binding protein ModC;                                                                                                                                                                |
| P | Q7W1F4 | DR | molybdenum ion transmembrane transporter activity                                                                                                                                                          |
| P | Q7W1Y0 | CC | Na <sup>+</sup> /H <sup>+</sup> antiporter that excludes sodium in exchange for external protons (By similarity).                                                                                          |
| P | Q7W1Y0 | DE | Na <sup>+</sup> /H <sup>+</sup> antiporter nhaA;                                                                                                                                                           |
| P | Q7W1Y0 | DE | Sodium/proton antiporter nhaA;                                                                                                                                                                             |
| P | Q7W359 | CC | Part of the ABC transporter complex HmuTUV involved in hemin import                                                                                                                                        |
| P | Q7W359 | DE | Hemin import ATP-binding protein HmuV;                                                                                                                                                                     |
| P | Q7W4E1 | CC | Part of the ABC transporter complex MetNIQ involved in methionine import                                                                                                                                   |
| P | Q7W4E1 | DE | Methionine import ATP-binding protein MetN;                                                                                                                                                                |
| P | Q7W536 | CC | One of the components of the high-affinity ATP-driven potassium transport (or KDP) system, which catalyzes the hydrolysis of ATP coupled with the exchange of hydrogen and potassium ions (By similarity). |
| P | Q7W536 | DE | Potassium-binding and translocating subunit A;                                                                                                                                                             |
| P | Q7W536 | DE | Potassium-translocating ATPase A chain;                                                                                                                                                                    |
| P | Q7W536 | DE | Potassium-transporting ATPase A chain;                                                                                                                                                                     |
| P | Q7W536 | DR | potassium-transporting ATPase activity                                                                                                                                                                     |
| P | Q7W6G5 | DR | glycerol-3-phosphate-transporting ATPase activity                                                                                                                                                          |
| P | Q7W736 | CC | Part of the ABC transporter complex CcmAB involved in the biogenesis of c-type cytochromes; once thought to export heme, this seems not to be the case, but its exact role is uncertain                    |
| P | Q7W736 | DE | Heme exporter protein A;                                                                                                                                                                                   |
| P | Q7W736 | DR | heme-transporting ATPase activity                                                                                                                                                                          |
| P | Q7W7H9 | CC | Transport of potassium into the cell (By similarity).                                                                                                                                                      |
| P | Q7W7H9 | DE | Probable potassium transport system protein kup;                                                                                                                                                           |
| P | Q7W7H9 | DR | potassium ion transmembrane transporter activity                                                                                                                                                           |
| P | Q7W8Q6 | CC | Part of the ABC transporter complex PstSACB involved in phosphate import                                                                                                                                   |
| P | Q7W8Q6 | DE | ABC phosphate transporter;                                                                                                                                                                                 |
| P | Q7W8Q6 | DE | Phosphate import ATP-binding protein PstB;                                                                                                                                                                 |
| P | Q7W8Q6 | DE | Phosphate-transporting ATPase;                                                                                                                                                                             |
| P | Q7W8Q6 | DR | inorganic phosphate transmembrane transporter activity                                                                                                                                                     |
| P | Q7W8Q6 | DR | phosphate transmembrane-transporting ATPase activity                                                                                                                                                       |
| P | Q7W8T0 | DE | Lipoprotein-releasing system ATP-binding protein LolD;                                                                                                                                                     |
| P | Q7W8T0 | DR | lipoprotein transporter activity                                                                                                                                                                           |
| P | Q7W917 | CC | Channel that permits osmotically driven movement of water in both directions                                                                                                                               |
| P | Q7W917 | CC | It mediates rapid entry or exit of water in response to abrupt changes in osmolarity (By similarity).                                                                                                      |
| P | Q7W9U5 | CC | Part of the ABC transporter complex CysAW 1F involved in sulfate/thiosulfate import                                                                                                                        |
| P | Q7W9U5 | DE | Sulfate-transporting ATPase;                                                                                                                                                                               |
| P | Q7W9U5 | DE | Sulfate/thiosulfate import ATP-binding protein CysA;                                                                                                                                                       |
| P | Q7W9U5 | DR | sulfate transmembrane-transporting ATPase activity                                                                                                                                                         |
| P | Q7WCL8 | CC | One of the components of the high-affinity ATP-driven potassium transport (or KDP) system, which catalyzes the hydrolysis of ATP coupled with the exchange of hydrogen and potassium ions (By similarity). |
| P | Q7WCL8 | DE | Potassium-binding and translocating subunit A;                                                                                                                                                             |
| P | Q7WCL8 | DE | Potassium-translocating ATPase A chain;                                                                                                                                                                    |
| P | Q7WCL8 | DE | Potassium-transporting ATPase A chain;                                                                                                                                                                     |
| P | Q7WCL8 | DR | potassium-transporting ATPase activity                                                                                                                                                                     |
| P | Q7WEH6 | CC | Part of the ABC transporter complex HmuTUV involved in hemin import                                                                                                                                        |
| P | Q7WEH6 | DE | Hemin import ATP-binding protein HmuV;                                                                                                                                                                     |
| P | Q7WFU9 | CC | Part of the ABC transporter complex MetNIQ involved in methionine import                                                                                                                                   |
| P | Q7WFU9 | DE | Methionine import ATP-binding protein MetN;                                                                                                                                                                |
| P | Q7WGW1 | CC | Part of the ABC transporter complex CysAW 1F involved in sulfate/thiosulfate import                                                                                                                        |
| P | Q7WGW1 | DE | Sulfate-transporting ATPase;                                                                                                                                                                               |
| P | Q7WGW1 | DE | Sulfate/thiosulfate import ATP-binding protein CysA;                                                                                                                                                       |
| P | Q7WGW1 | DR | sulfate transmembrane-transporting ATPase activity                                                                                                                                                         |
| P | Q7WID6 | DR | glycerol-3-phosphate-transporting ATPase activity                                                                                                                                                          |
| P | Q7WIP8 | CC | Part of the ABC transporter complex CcmAB involved in the biogenesis of c-type cytochromes; once thought to export heme, this seems not to be the case, but its exact role is uncertain                    |
| P | Q7WIP8 | DE | Heme exporter protein A;                                                                                                                                                                                   |
| P | Q7WIP8 | DR | heme-transporting ATPase activity                                                                                                                                                                          |

|   |        |    |                                                                                                                            |
|---|--------|----|----------------------------------------------------------------------------------------------------------------------------|
| P | Q7WK40 | DE | Lipoprotein-releasing system ATP-binding protein LolD;                                                                     |
| P | Q7WK40 | DR | lipoprotein transporter activity                                                                                           |
| P | Q7WKG2 | CC | Channel that permits osmotically driven movement of water in both directions                                               |
| P | Q7WKG2 | CC | It mediates rapid entry or exit of water in response to abrupt changes in osmolality (By similarity).                      |
| P | Q7WKW8 | CC | Transport of potassium into the cell (By similarity).                                                                      |
| P | Q7WKW8 | DE | Probable potassium transport system protein kup;                                                                           |
| P | Q7WKW8 | DR | potassium ion transmembrane transporter activity                                                                           |
| P | Q7WNT8 | DR | phosphonate transmembrane-transporting ATPase activity                                                                     |
| P | Q7WP62 | CC | Part of the ABC transporter complex ModABC involved in molybdenum import                                                   |
| P | Q7WP62 | DE | Molybdenum import ATP-binding protein ModC;                                                                                |
| P | Q7WP62 | DR | molybdenum ion transmembrane transporter activity                                                                          |
| P | Q7WQV8 | CC | Na <sup>+</sup> /H <sup>+</sup> antiporter that excludes sodium in exchange for external protons (By similarity)           |
| P | Q7WQV8 | DE | Na <sup>+</sup> /H <sup>+</sup> antiporter nhaA;                                                                           |
| P | Q7WQV8 | DE | Sodium/proton antiporter nhaA;                                                                                             |
| P | Q7X7V2 | CC | High-affinity transporter for external inorganic phosphate (By similarity).                                                |
| P | Q7X7V2 | DE | Probable inorganic phosphate transporter 1-5;                                                                              |
| P | Q7X7V2 | DR | inorganic phosphate transmembrane transporter activity                                                                     |
| P | Q7XDZ7 | CC | High-affinity transporter for external inorganic phosphate (By similarity).                                                |
| P | Q7XDZ7 | DE | Probable inorganic phosphate transporter 1-3;                                                                              |
| P | Q7XDZ7 | DR | inorganic phosphate transmembrane transporter activity                                                                     |
| P | Q7XIV8 | CC | High-affinity potassium transporter (By similarity).                                                                       |
| P | Q7XIV8 | DE | Probable potassium transporter 9;                                                                                          |
| P | Q7XIV8 | DR | potassium ion transmembrane transporter activity                                                                           |
| P | Q7XKI5 | CC | Aquaporins facilitate the transport of water and small neutral solutes across cell membranes                               |
| P | Q7XLC6 | CC | High-affinity potassium transporter (By similarity).                                                                       |
| P | Q7XLC6 | DE | Probable potassium transporter 11;                                                                                         |
| P | Q7XLC6 | DR | potassium ion transmembrane transporter activity                                                                           |
| P | Q7XLR1 | CC | Aquaporins facilitate the transport of water and small neutral solutes across cell membranes (By similarity).              |
| P | Q7XPF8 | CC | May be involved in regulation of K <sup>+</sup> /Na <sup>+</sup> homeostasis                                               |
| P | Q7XPF8 | CC | Seems to act as a low-affinity sodium transporter.                                                                         |
| P | Q7XPL3 | CC | High-affinity potassium transporter (By similarity).                                                                       |
| P | Q7XPL3 | DE | Probable potassium transporter 15;                                                                                         |
| P | Q7XPL3 | DR | potassium ion transmembrane transporter activity                                                                           |
| P | Q7XQQ1 | CC | Putative magnesium transporter (By similarity).                                                                            |
| P | Q7XQQ1 | DE | Putative magnesium transporter MRS2-D;                                                                                     |
| P | Q7XRH8 | CC | High-affinity transporter for external inorganic phosphate (By similarity).                                                |
| P | Q7XRH8 | DE | Putative inorganic phosphate transporter 1-13;                                                                             |
| P | Q7XSQ9 | CC | Aquaporins facilitate the transport of water and small neutral solutes across cell membranes (By similarity).              |
| P | Q7XU31 | CC | Aquaporins facilitate the transport of water and small neutral solutes across cell membranes                               |
| P | Q7XUA6 | CC | Aquaporins facilitate the transport of water and small neutral solutes across cell membranes (By similarity).              |
| P | Q7Y051 | DR | copper-exporting ATPase activity                                                                                           |
| P | Q7Y1E6 | CC | Aquaporins facilitate the transport of water and small neutral solutes across cell membranes (By similarity).              |
| P | Q7Z418 | CC | may function as background potassium channel that sets the resting membrane potential                                      |
| P | Q7Z418 | CC | Outward rectifying potassium channel                                                                                       |
| P | Q7Z418 | CC | Produces rapidly activating outward rectifier K <sup>+</sup> currents                                                      |
| P | Q7Z418 | DE | Potassium channel subfamily K member 18;                                                                                   |
| P | Q7Z418 | DE | TWIK-related individual potassium channel;                                                                                 |
| P | Q7Z418 | DE | TWIK-related spinal cord potassium channel;                                                                                |
| P | Q80XM3 | CC | Potassium channel subunit                                                                                                  |
| P | Q80XM3 | DE | Potassium voltage-gated channel subfamily G member 4;                                                                      |
| P | Q80XM3 | DE | Voltage-gated potassium channel subunit Kv6.4;                                                                             |
| P | Q80XM3 | DR | voltage-gated potassium channel activity                                                                                   |
| P | Q80XR2 | CC | This magnesium-dependent enzyme catalyzes the hydrolysis of ATP coupled with the transport of the calcium (By similarity). |
| P | Q80XR2 | DE | ATP-dependent Ca <sup>2+</sup> pump PMR1;                                                                                  |
| P | Q80XR2 | DE | Calcium-transporting ATPase type 2C member 1;                                                                              |
| P | Q80XR2 | DR | calcium-transporting ATPase activity                                                                                       |
| P | Q80XR2 | DR | manganese-transporting ATPase activity                                                                                     |

|   |        |    |                                                                                                                                                                                                                  |
|---|--------|----|------------------------------------------------------------------------------------------------------------------------------------------------------------------------------------------------------------------|
| P | Q80ZD3 | CC | Exhibits sodium-independent sulfate anion transporter activity that may cooperate with SLC26A2 to mediate DIDS-sensitive sulfate uptake into high endothelial venules endothelial cells (HEVEC) (By similarity). |
| P | Q80ZD3 | DE | Sodium-independent sulfate anion transporter;                                                                                                                                                                    |
| P | Q80ZD3 | DR | secondary active sulfate transmembrane transporter activity                                                                                                                                                      |
| P | Q814U8 | CC | This system is involved in glucose transport (By similarity).                                                                                                                                                    |
| P | Q814U8 | DE | Glucose-specific phosphotransferase enzyme IIA component;                                                                                                                                                        |
| P | Q814U8 | DE | PTS system glucose-specific EIIA component;                                                                                                                                                                      |
| P | Q815Y7 | CC | Part of the ABC transporter complex MetNIQ involved in methionine import                                                                                                                                         |
| P | Q815Y7 | DE | Methionine import ATP-binding protein MetN 3;                                                                                                                                                                    |
| P | Q816V0 | CC | Involved in the uptake of glucose (By similarity).                                                                                                                                                               |
| P | Q816V0 | DE | Probable glucose uptake protein glcU;                                                                                                                                                                            |
| P | Q818I7 | CC | Part of the ABC transporter complex PstSACB involved in phosphate import                                                                                                                                         |
| P | Q818I7 | DE | ABC phosphate transporter;                                                                                                                                                                                       |
| P | Q818I7 | DE | Phosphate import ATP-binding protein PstB;                                                                                                                                                                       |
| P | Q818I7 | DE | Phosphate-transporting ATPase;                                                                                                                                                                                   |
| P | Q818I7 | DR | inorganic phosphate transmembrane transporter activity                                                                                                                                                           |
| P | Q818I7 | DR | phosphate transmembrane-transporting ATPase activity                                                                                                                                                             |
| P | Q81A96 | DR | phosphonate transmembrane-transporting ATPase activity                                                                                                                                                           |
| P | Q81GC1 | CC | Part of the ABC transporter complex PotABCD involved in spermidine/putrescine import                                                                                                                             |
| P | Q81GC1 | CC | Part of the ABC transporter complex PotABCD involved in spermidine/putrescine import                                                                                                                             |
| P | Q81GC1 | DE | Spermidine/putrescine import ATP-binding protein PotA;                                                                                                                                                           |
| P | Q81GC1 | DE | Spermidine/putrescine import ATP-binding protein PotA;                                                                                                                                                           |
| P | Q81GU1 | CC | Part of the ABC transporter complex CysAWTF involved in sulfate/thiosulfate import                                                                                                                               |
| P | Q81GU1 | DE | Sulfate-transporting ATPase;                                                                                                                                                                                     |
| P | Q81GU1 | DE | Sulfate/thiosulfate import ATP-binding protein CysA;                                                                                                                                                             |
| P | Q81GU1 | DR | sulfate transmembrane-transporting ATPase activity                                                                                                                                                               |
| P | Q81HP9 | CC | One of the components of the high-affinity ATP-driven potassium transport (or KDP) system, which catalyzes the hydrolysis of ATP coupled with the exchange of hydrogen and potassium ions                        |
| P | Q81HP9 | DE | Potassium-binding and translocating subunit C;                                                                                                                                                                   |
| P | Q81HP9 | DE | Potassium-translocating ATPase C chain;                                                                                                                                                                          |
| P | Q81HP9 | DE | Potassium-transporting ATPase C chain;                                                                                                                                                                           |
| P | Q81HP9 | DR | potassium-transporting ATPase activity                                                                                                                                                                           |
| P | Q81HQ0 | CC | One of the components of the high-affinity ATP-driven potassium transport (or KDP) system, which catalyzes the hydrolysis of ATP coupled with the exchange of hydrogen and potassium ions (By similarity).       |
| P | Q81HQ0 | DE | Potassium-binding and translocating subunit B;                                                                                                                                                                   |
| P | Q81HQ0 | DE | Potassium-translocating ATPase B chain;                                                                                                                                                                          |
| P | Q81HQ0 | DE | Potassium-transporting ATPase B chain;                                                                                                                                                                           |
| P | Q81HQ0 | DR | potassium-transporting ATPase activity                                                                                                                                                                           |
| P | Q81HQ1 | CC | One of the components of the high-affinity ATP-driven potassium transport (or KDP) system, which catalyzes the hydrolysis of ATP coupled with the exchange of hydrogen and potassium ions (By similarity).       |
| P | Q81HQ1 | DE | Potassium-binding and translocating subunit A;                                                                                                                                                                   |
| P | Q81HQ1 | DE | Potassium-translocating ATPase A chain;                                                                                                                                                                          |
| P | Q81HQ1 | DE | Potassium-transporting ATPase A chain;                                                                                                                                                                           |
| P | Q81HQ1 | DR | potassium-transporting ATPase activity                                                                                                                                                                           |
| P | Q81HW8 | CC | Part of the ABC transporter complex RbsABCD involved in ribose import                                                                                                                                            |
| P | Q81HW8 | DE | Ribose import ATP-binding protein RbsA;                                                                                                                                                                          |
| P | Q81IN8 | CC | Part of the ABC transporter complex MetNIQ involved in methionine import                                                                                                                                         |
| P | Q81IN8 | DE | Methionine import ATP-binding protein MetN 2;                                                                                                                                                                    |
| P | Q81IZ6 | CC | Part of the ABC transporter complex MetNIQ involved in methionine import                                                                                                                                         |
| P | Q81IZ6 | DE | Methionine import ATP-binding protein MetN 1;                                                                                                                                                                    |
| P | Q81JY0 | CC | This system is involved in glucose transport (By similarity).                                                                                                                                                    |
| P | Q81JY0 | DE | Glucose-specific phosphotransferase enzyme IIA component;                                                                                                                                                        |
| P | Q81JY0 | DE | PTS system glucose-specific EIIA component;                                                                                                                                                                      |
| P | Q81KM7 | CC | Involved in the uptake of glucose (By similarity).                                                                                                                                                               |
| P | Q81KM7 | DE | Probable glucose uptake protein glcU;                                                                                                                                                                            |
| P | Q81LW6 | CC | Part of the ABC transporter complex PstSACB involved in phosphate import                                                                                                                                         |
| P | Q81LW6 | DE | ABC phosphate transporter;                                                                                                                                                                                       |
| P | Q81LW6 | DE | Phosphate import ATP-binding protein PstB;                                                                                                                                                                       |
| P | Q81LW6 | DE | Phosphate-transporting ATPase;                                                                                                                                                                                   |
| P | Q81LW6 | DR | inorganic phosphate transmembrane transporter activity                                                                                                                                                           |
| P | Q81LW6 | DR | phosphate transmembrane-transporting ATPase activity                                                                                                                                                             |

|   |        |    |                                                                                                                                                                                                            |
|---|--------|----|------------------------------------------------------------------------------------------------------------------------------------------------------------------------------------------------------------|
| P | Q81TH8 | CC | part of the ABC transporter complex PotABCD involved in                                                                                                                                                    |
| P | Q81TH8 | CC | part of the ABC transporter complex PotABCD involved in                                                                                                                                                    |
| P | Q81TH8 | DE | spermidine/putrescine import                                                                                                                                                                               |
| P | Q81TH8 | DE | Spermidine/putrescine import ATP-binding protein PotA;                                                                                                                                                     |
| P | Q81UW5 | CC | One of the components of the high-affinity ATP-driven potassium transport (or KDP) system, which catalyzes the hydrolysis of ATP coupled with the exchange of hydrogen and potassium ions                  |
| P | Q81UW5 | DE | Potassium-binding and translocating subunit C;                                                                                                                                                             |
| P | Q81UW5 | DE | Potassium-translocating ATPase C chain;                                                                                                                                                                    |
| P | Q81UW5 | DE | Potassium-transporting ATPase C chain;                                                                                                                                                                     |
| P | Q81UW5 | DR | potassium-transporting ATPase activity                                                                                                                                                                     |
| P | Q81UW7 | CC | One of the components of the high-affinity ATP-driven potassium transport (or KDP) system, which catalyzes the hydrolysis of ATP coupled with the exchange of hydrogen and potassium ions (By similarity). |
| P | Q81UW7 | DE | Potassium-binding and translocating subunit A;                                                                                                                                                             |
| P | Q81UW7 | DE | Potassium-translocating ATPase A chain;                                                                                                                                                                    |
| P | Q81UW7 | DE | Potassium-transporting ATPase A chain;                                                                                                                                                                     |
| P | Q81UW7 | DR | potassium-transporting ATPase activity                                                                                                                                                                     |
| P | Q81V36 | CC | Part of the ABC transporter complex RbsABCD involved in ribose import                                                                                                                                      |
| P | Q81V36 | DE | Ribose import ATP-binding protein RbsA;                                                                                                                                                                    |
| P | Q81VM2 | CC | Part of the ABC transporter complex MetNIQ involved in methionine import                                                                                                                                   |
| P | Q81VM2 | DE | Methionine import ATP-binding protein MetN 1;                                                                                                                                                              |
| P | Q81XL3 | CC | Part of the ABC transporter complex MetNIQ involved in methionine import                                                                                                                                   |
| P | Q81XL3 | DE | Methionine import ATP-binding protein MetN 3;                                                                                                                                                              |
| P | Q81Y10 | DR | phosphonate transmembrane-transporting ATPase activity                                                                                                                                                     |
| P | Q81ZF5 | CC | Part of the ABC transporter complex MetNIQ involved in methionine import                                                                                                                                   |
| P | Q81ZF5 | DE | Methionine import ATP-binding protein MetN 2;                                                                                                                                                              |
| P | Q822F2 | CC | The arginine uptake by the bacterium in the macrophage may be a virulence factor against the host innate immune response (By similarity).                                                                  |
| P | Q822F2 | DE | Arginine/agmatine antiporter;                                                                                                                                                                              |
| P | Q823C4 | CC | Part of the ABC transporter complex MetNIQ involved in methionine import                                                                                                                                   |
| P | Q823C4 | DE | Methionine import ATP-binding protein MetN;                                                                                                                                                                |
| P | Q825P1 | CC | Part of the ABC transporter complex RbsABCD involved in ribose import                                                                                                                                      |
| P | Q825P1 | DE | Ribose import ATP-binding protein RbsA 2;                                                                                                                                                                  |
| P | Q827Y0 | CC | Part of the ABC transporter complex MetNIQ involved in methionine import                                                                                                                                   |
| P | Q827Y0 | DE | Methionine import ATP-binding protein MetN;                                                                                                                                                                |
| P | Q82CM5 | CC | Part of the ABC transporter complex RbsABCD involved in ribose import                                                                                                                                      |
| P | Q82CM5 | DE | Ribose import ATP-binding protein RbsA 1;                                                                                                                                                                  |
| P | Q82EL6 | CC | Na <sup>+</sup> /H <sup>+</sup> antiporter that excludes sodium in exchange for external protons (By similarity)                                                                                           |
| P | Q82EL6 | DE | Na <sup>+</sup> /H <sup>+</sup> antiporter nhaA;                                                                                                                                                           |
| P | Q82EL6 | DE | Sodium/proton antiporter nhaA;                                                                                                                                                                             |
| P | Q82G23 | CC | Part of the ABC transporter complex PstSACB involved in phosphate import                                                                                                                                   |
| P | Q82G23 | DE | ABC phosphate transporter;                                                                                                                                                                                 |
| P | Q82G23 | DE | Phosphate import ATP-binding protein PstB;                                                                                                                                                                 |
| P | Q82G23 | DE | Phosphate-transporting ATPase;                                                                                                                                                                             |
| P | Q82G23 | DR | inorganic phosphate transmembrane transporter activity                                                                                                                                                     |
| P | Q82G23 | DR | phosphate transmembrane-transporting ATPase activity                                                                                                                                                       |
| P | Q82PI3 | CC | One of the components of the high-affinity ATP-driven potassium transport (or KDP) system, which catalyzes the hydrolysis of ATP coupled with the exchange of hydrogen and potassium ions (By similarity). |
| P | Q82PI3 | DE | Potassium-binding and translocating subunit A;                                                                                                                                                             |
| P | Q82PI3 | DE | Potassium-translocating ATPase A chain;                                                                                                                                                                    |
| P | Q82PI3 | DE | Potassium-transporting ATPase A chain;                                                                                                                                                                     |
| P | Q82PI3 | DR | potassium-transporting ATPase activity                                                                                                                                                                     |
| P | Q82PI5 | CC | One of the components of the high-affinity ATP-driven potassium transport (or KDP) system, which catalyzes the hydrolysis of ATP coupled with the exchange of hydrogen and potassium ions                  |
| P | Q82PI5 | DE | Potassium-binding and translocating subunit C;                                                                                                                                                             |
| P | Q82PI5 | DE | Potassium-translocating ATPase C chain;                                                                                                                                                                    |
| P | Q82PI5 | DE | Potassium-transporting ATPase C chain;                                                                                                                                                                     |
| P | Q82PI5 | DR | potassium-transporting ATPase activity                                                                                                                                                                     |
| P | Q82TL6 | CC | part of the ABC transporter complex PotABCD involved in                                                                                                                                                    |
| P | Q82TL6 | CC | part of the ABC transporter complex PotABCD involved in                                                                                                                                                    |
| P | Q82TL6 | DE | spermidine/putrescine import                                                                                                                                                                               |
| P | Q82TL6 | DE | Spermidine/putrescine import ATP-binding protein PotA;                                                                                                                                                     |
| P | Q82TL6 | DE | Spermidine/putrescine import ATP-binding protein PotA;                                                                                                                                                     |

|   |        |    |                                                                                                                                                                                         |
|---|--------|----|-----------------------------------------------------------------------------------------------------------------------------------------------------------------------------------------|
| P | Q82VL9 | DE | Lipoprotein-releasing system ATP-binding protein LolD;                                                                                                                                  |
| P | Q82VL9 | DR | lipoprotein transporter activity                                                                                                                                                        |
| P | Q82VR4 | CC | Part of the ABC transporter complex PstSACB involved in phosphate import                                                                                                                |
| P | Q82VR4 | DE | ABC phosphate transporter;                                                                                                                                                              |
| P | Q82VR4 | DE | Phosphate import ATP-binding protein PstB;                                                                                                                                              |
| P | Q82VR4 | DE | Phosphate-transporting ATPase;                                                                                                                                                          |
| P | Q82VR4 | DR | inorganic phosphate transmembrane transporter activity                                                                                                                                  |
| P | Q82VR4 | DR | phosphate transmembrane-transporting ATPase activity                                                                                                                                    |
| P | Q82WC8 | CC | Part of the ABC transporter complex CcmAB involved in the biogenesis of c-type cytochromes; once thought to export heme, this seems not to be the case, but its exact role is uncertain |
| P | Q82WC8 | DE | Heme exporter protein A;                                                                                                                                                                |
| P | Q82WC8 | DR | heme-transporting ATPase activity                                                                                                                                                       |
| P | Q82WT5 | CC | Part of the ABC transporter complex CysAW 1F involved in sulfate/thiosulfate import                                                                                                     |
| P | Q82WT5 | DE | Sulfate-transporting ATPase;                                                                                                                                                            |
| P | Q82WT5 | DE | Sulfate/thiosulfate import ATP-binding protein CysA;                                                                                                                                    |
| P | Q82WT5 | DR | sulfate transmembrane-transporting ATPase activity                                                                                                                                      |
| P | Q82ZN5 | CC | Involved in the import of serine and threonine into the cell, with the concomitant import of sodium (symport system) (By similarity).                                                   |
| P | Q82ZN5 | DE | Na <sup>+</sup> /serine-threonine symporter;                                                                                                                                            |
| P | Q82ZN5 | DR | sodium:dicarboxylate symporter activity                                                                                                                                                 |
| P | Q82ZN5 | DR | sodium:dicarboxylate symporter activity                                                                                                                                                 |
| P | Q82ZT8 | CC | Could be involved in the uptake of ribose (By similarity).                                                                                                                              |
| P | Q82ZT8 | DE | Putative ribose uptake protein rbsU;                                                                                                                                                    |
| P | Q830V1 | DE | Magnesium transporter mgfE;                                                                                                                                                             |
| P | Q830W6 | CC | Part of the ABC transporter complex PotABCD involved in spermidine/putrescine import                                                                                                    |
| P | Q830W6 | CC | Part of the ABC transporter complex PotABCD involved in spermidine/putrescine import                                                                                                    |
| P | Q830W6 | DE | Spermidine/putrescine import ATP-binding protein PotA;                                                                                                                                  |
| P | Q830W6 | DE | Spermidine/putrescine import ATP-binding protein PotA;                                                                                                                                  |
| P | Q832Y6 | CC | Part of the ABC transporter complex MetNIQ involved in methionine import                                                                                                                |
| P | Q832Y6 | DE | Methionine import ATP-binding protein MetN 1;                                                                                                                                           |
| P | Q834B3 | CC | Part of the ABC transporter complex PstSACB involved in phosphate import                                                                                                                |
| P | Q834B3 | DE | ABC phosphate transporter 2;                                                                                                                                                            |
| P | Q834B3 | DE | Phosphate import ATP-binding protein PstB 2;                                                                                                                                            |
| P | Q834B3 | DE | Phosphate-transporting ATPase 2;                                                                                                                                                        |
| P | Q834B3 | DR | inorganic phosphate transmembrane transporter activity                                                                                                                                  |
| P | Q834B3 | DR | phosphate transmembrane-transporting ATPase activity                                                                                                                                    |
| P | Q834B4 | CC | Part of the ABC transporter complex PstSACB involved in phosphate import                                                                                                                |
| P | Q834B4 | DE | ABC phosphate transporter 1;                                                                                                                                                            |
| P | Q834B4 | DE | Phosphate import ATP-binding protein PstB 1;                                                                                                                                            |
| P | Q834B4 | DE | Phosphate-transporting ATPase 1;                                                                                                                                                        |
| P | Q834B4 | DR | inorganic phosphate transmembrane transporter activity                                                                                                                                  |
| P | Q834B4 | DR | phosphate transmembrane-transporting ATPase activity                                                                                                                                    |
| P | Q837G9 | CC | Transport of potassium into the cell (By similarity).                                                                                                                                   |
| P | Q837G9 | DE | Probable potassium transport system protein kup;                                                                                                                                        |
| P | Q837G9 | DR | potassium ion transmembrane transporter activity                                                                                                                                        |
| P | Q83CV2 | DE | Lipoprotein-releasing system ATP-binding protein LolD;                                                                                                                                  |
| P | Q83CV2 | DR | lipoprotein transporter activity                                                                                                                                                        |
| P | Q83GE8 | CC | Part of the ABC transporter complex PstSACB involved in phosphate import                                                                                                                |
| P | Q83GE8 | DE | ABC phosphate transporter;                                                                                                                                                              |
| P | Q83GE8 | DE | Phosphate import ATP-binding protein PstB;                                                                                                                                              |
| P | Q83GE8 | DE | Phosphate-transporting ATPase;                                                                                                                                                          |
| P | Q83GE8 | DR | phosphate transmembrane-transporting ATPase activity                                                                                                                                    |
| P | Q83HT1 | CC | Part of the ABC transporter complex PstSACB involved in phosphate import                                                                                                                |
| P | Q83HT1 | DE | ABC phosphate transporter;                                                                                                                                                              |
| P | Q83HT1 | DE | Phosphate import ATP-binding protein PstB;                                                                                                                                              |
| P | Q83HT1 | DE | Phosphate-transporting ATPase;                                                                                                                                                          |
| P | Q83HT1 | DR | phosphate transmembrane-transporting ATPase activity                                                                                                                                    |
| P | Q83J33 | CC | Part of the ABC transporter complex XylFGH involved in xylose import                                                                                                                    |
| P | Q83J33 | DE | Xylose import ATP-binding protein XylG;                                                                                                                                                 |
| P | Q83J33 | DR | D-xylose-importing ATPase activity                                                                                                                                                      |
| P | Q83J77 | CC | Part of the ABC transporter complex NikABCDE involved in nickel import                                                                                                                  |
| P | Q83J77 | DE | Nickel import ATP-binding protein NikE;                                                                                                                                                 |
| P | Q83J77 | DR | nickel-transporting ATPase activity                                                                                                                                                     |
| P | Q83J78 | CC | Part of the ABC transporter complex NikABCDE involved in nickel import                                                                                                                  |

|   |        |    |                                                                                                                                                                                         |
|---|--------|----|-----------------------------------------------------------------------------------------------------------------------------------------------------------------------------------------|
| P | Q83J78 | DE | Nickel import ATP-binding protein NikD;                                                                                                                                                 |
| P | Q83J78 | DR | nickel-transporting ATPase activity                                                                                                                                                     |
| P | Q83JJ9 | CC | Catalyzes the uptake of tartrate in exchange for intracellular succinate                                                                                                                |
| P | Q83JJ9 | DE | L-tartrate/succinate antiporter;                                                                                                                                                        |
| P | Q83KD5 | CC | Part of the ABC transporter complex CcmAB involved in the biogenesis of c-type cytochromes; once thought to export heme, this seems not to be the case, but its exact role is uncertain |
| P | Q83KD5 | DE | Heme exporter protein A;                                                                                                                                                                |
| P | Q83KD5 | DR | heme-transporting ATPase activity                                                                                                                                                       |
| P | Q83KP2 | DR | L-arabinose-importing ATPase activity                                                                                                                                                   |
| P | Q83KR7 | CC | Part of the ABC transporter complex ZnuABC involved in zinc import                                                                                                                      |
| P | Q83KR7 | DE | Zinc import ATP-binding protein ZnuC;                                                                                                                                                   |
| P | Q83KR7 | DR | zinc transporting ATPase activity                                                                                                                                                       |
| P | Q83MA0 | CC | Part of the ABC transporter complex TauABC involved in taurine import                                                                                                                   |
| P | Q83MA0 | DE | Taurine import ATP-binding protein TauB;                                                                                                                                                |
| P | Q83MA0 | DR | taurine-transporting ATPase activity                                                                                                                                                    |
| P | Q83MC5 | CC | Part of the ABC transporter complex MetNIQ involved in methionine import                                                                                                                |
| P | Q83MC5 | DE | Methionine import ATP-binding protein MetN;                                                                                                                                             |
| P | Q83MC5 | DR | D-methionine transmembrane transporter activity                                                                                                                                         |
| P | Q83MD7 | CC | Binds vitamin B12 and delivers it to the periplasmic surface of BtuC (By similarity)                                                                                                    |
| P | Q83MD7 | CC | Part of the ABC transporter complex BtuCDF involved in vitamin B12 import                                                                                                               |
| P | Q83MG3 | CC | Part of the ABC transporter complex ThiBPQ involved in thiamine import                                                                                                                  |
| P | Q83MG3 | DE | Thiamine import ATP-binding protein ThiQ;                                                                                                                                               |
| P | Q83N58 | CC | Na <sup>+</sup> /H <sup>+</sup> antiporter that excludes sodium in exchange for external protons (By similarity)                                                                        |
| P | Q83N58 | DE | Na <sup>+</sup> /H <sup>+</sup> antiporter nhaA;                                                                                                                                        |
| P | Q83N58 | DE | Sodium/proton antiporter nhaA;                                                                                                                                                          |
| P | Q83P81 | CC | Part of the binding-protein-dependent transport system for maltose; probably responsible for the translocation of the substrate across the membrane (By similarity)                     |
| P | Q83P81 | DE | Maltose transport system permease protein malF;                                                                                                                                         |
| P | Q83P97 | DR | phosphonate transmembrane-transporting ATPase activity                                                                                                                                  |
| P | Q83PD8 | CC | Uptake of L-rhamnose across the boundary membrane with the concomitant transport of protons into the cell (symport system) (By similarity).                                             |
| P | Q83PD8 | DE | L-rhamnose-H <sup>+</sup> transport protein;                                                                                                                                            |
| P | Q83PD8 | DE | L-rhamnose-proton symporter;                                                                                                                                                            |
| P | Q83PJ2 | CC | Responsible for the low-affinity transport of potassium into the cell, with the probable concomitant uptake of protons (symport system) (By similarity).                                |
| P | Q83PJ2 | DE | Kup system potassium uptake protein;                                                                                                                                                    |
| P | Q83PJ2 | DE | Low affinity potassium transport system protein kup;                                                                                                                                    |
| P | Q83PJ2 | DR | potassium ion transmembrane transporter activity                                                                                                                                        |
| P | Q83PY0 | CC | Transport system that facilitates potassium-efflux, possibly by potassium-proton antiport (By similarity).                                                                              |
| P | Q83PY0 | DE | K <sup>+</sup> /H <sup>+</sup> antiporter;                                                                                                                                              |
| P | Q83PY0 | DE | NEM-activable K <sup>+</sup> /H <sup>+</sup> antiporter;                                                                                                                                |
| P | Q83PY0 | DE | Putative glutathione-regulated potassium-efflux system protein kefB;                                                                                                                    |
| P | Q83PY0 | DR | glutathione-regulated potassium exporter activity                                                                                                                                       |
| P | Q83Q28 | CC | Involved in the import of threonine and serine into the cell, with the concomitant import of a proton (symport system) (By similarity).                                                 |
| P | Q83Q28 | DE | Threonine/serine transporter TdcC;                                                                                                                                                      |
| P | Q83Q34 | CC | Involved in the import of serine and threonine into the cell, with the concomitant import of sodium (symport system) (By similarity).                                                   |
| P | Q83Q34 | DE | Na <sup>+</sup> /serine-threonine symporter;                                                                                                                                            |
| P | Q83Q34 | DR | sodium:dicarboxylate symporter activity                                                                                                                                                 |
| P | Q83Q34 | DR | sodium:dicarboxylate symporter activity                                                                                                                                                 |
| P | Q83QD0 | CC | Involved in the import of serine into the cell                                                                                                                                          |
| P | Q83QD0 | DE | Serine transporter;                                                                                                                                                                     |
| P | Q83QV3 | CC | Required for the export of heme to the periplasm for the biogenesis of c-type cytochromes (By similarity).                                                                              |
| P | Q83QV3 | DE | Heme exporter protein B;                                                                                                                                                                |
| P | Q83QV3 | DR | heme transporter activity                                                                                                                                                               |
| P | Q83RQ5 | CC | Na <sup>+</sup> /H <sup>+</sup> antiporter that excludes sodium in exchange for external protons (By similarity)                                                                        |
| P | Q83RQ5 | DE | Na <sup>+</sup> /H <sup>+</sup> antiporter nhaB;                                                                                                                                        |
| P | Q83RQ5 | DE | Sodium/proton antiporter nhaB;                                                                                                                                                          |
| P | Q83RQ5 | DR | sodium:hydrogen antiporter activity                                                                                                                                                     |
| P | Q83RR7 | CC | Required for the activity of the bacterial periplasmic transport system of putrescine and spermidine (By similarity).                                                                   |



|   |        |    |                                                                                                                                                                                                                                                |
|---|--------|----|------------------------------------------------------------------------------------------------------------------------------------------------------------------------------------------------------------------------------------------------|
| P | Q83RR7 | CC | Required for the activity of the bacterial periplasmic transport system of putrescine and spermidine (By similarity).                                                                                                                          |
| P | Q83RR7 | DE | Spermidine/putrescine transport system permease protein PotC;                                                                                                                                                                                  |
| P | Q83RR7 | DE | Spermidine/putrescine transport system permease protein PotC;                                                                                                                                                                                  |
| P | Q83RS0 | DE | Lipoprotein-releasing system ATP-binding protein LolD;                                                                                                                                                                                         |
| P | Q83RS0 | DR | lipoprotein transporter activity                                                                                                                                                                                                               |
| P | Q83S83 | CC | One of the components of the high-affinity ATP-driven potassium transport (or KDP) system, which catalyzes the hydrolysis of ATP coupled with the exchange of hydrogen and potassium ions (By similarity).                                     |
| P | Q83S83 | DE | Potassium-binding and translocating subunit A;                                                                                                                                                                                                 |
| P | Q83S83 | DE | Potassium-translocating ATPase A chain;                                                                                                                                                                                                        |
| P | Q83S83 | DE | Potassium-transporting ATPase A chain;                                                                                                                                                                                                         |
| P | Q83S83 | DR | potassium-transporting ATPase activity                                                                                                                                                                                                         |
| P | Q83SA2 | CC | Involved in zinc efflux across the cytoplasmic membrane, thus reducing zinc accumulation in the cytoplasm and rendering bacteria more resistant to zinc (it may contribute to zinc homeostasis at low concentrations of zinc (By similarity)). |
| P | Q83SA2 | CC |                                                                                                                                                                                                                                                |
| P | Q83SA2 | DE | Zinc transporter zitB;                                                                                                                                                                                                                         |
| P | Q83SQ3 | CC | Transport system that facilitates potassium-efflux, possibly by potassium-proton antiport (By similarity).                                                                                                                                     |
| P | Q83SQ3 | DE | Glutathione-regulated potassium-efflux system protein kefC;                                                                                                                                                                                    |
| P | Q83SQ3 | DE | K <sup>+</sup> /H <sup>+</sup> antiporter;                                                                                                                                                                                                     |
| P | Q83SR3 | CC | Na <sup>+</sup> /H <sup>+</sup> antiporter that extrudes sodium in exchange for external protons (By similarity).                                                                                                                              |
| P | Q83SR3 | DE | Na <sup>+</sup> /H <sup>+</sup> antiporter nhaA;                                                                                                                                                                                               |
| P | Q83SR3 | DE | Sodium/proton antiporter nhaA;                                                                                                                                                                                                                 |
| P | Q84MA8 | CC | Transports natural purines (adenine and guanine) as well as purine analogs                                                                                                                                                                     |
| P | Q84MA8 | DE | Adenine/guanine permease AZG2;                                                                                                                                                                                                                 |
| P | Q84MA8 | DE | Adenine/guanine permease AZG2;                                                                                                                                                                                                                 |
| P | Q84MA8 | DR | purine base transmembrane transporter activity                                                                                                                                                                                                 |
| P | Q84MS3 | CC | High-affinity potassium transporter (By similarity).                                                                                                                                                                                           |
| P | Q84MS3 | DE | Probable potassium transporter 16;                                                                                                                                                                                                             |
| P | Q84MS3 | DR | potassium ion transmembrane transporter activity                                                                                                                                                                                               |
| P | Q84MS4 | CC | High-affinity potassium transporter (By similarity).                                                                                                                                                                                           |
| P | Q84MS4 | DE | Potassium transporter 27;                                                                                                                                                                                                                      |
| P | Q84MS4 | DR | potassium ion transmembrane transporter activity                                                                                                                                                                                               |
| P | Q84S07 | CC | Aquaporins facilitate the transport of water and small neutral solutes across cell membranes (By similarity).                                                                                                                                  |
| P | Q84TI7 | CC | Does not transport K <sup>+</sup> but regulates K <sup>+</sup> nutrient status via its ability to facilitate Na <sup>+</sup> homeostasis                                                                                                       |
| P | Q84TI7 | DR | potassium ion transmembrane transporter activity                                                                                                                                                                                               |
| P | Q84WG1 | DE | Na <sup>+</sup> /H <sup>+</sup> exchanger 3;                                                                                                                                                                                                   |
| P | Q84WG1 | DE | Sodium/hydrogen exchanger 3;                                                                                                                                                                                                                   |
| P | Q84WG1 | DR | sodium:hydrogen antiporter activity                                                                                                                                                                                                            |
| P | Q84YJ9 | CC | High-affinity potassium transporter (By similarity).                                                                                                                                                                                           |
| P | Q84YJ9 | DE | Potassium transporter 26;                                                                                                                                                                                                                      |
| P | Q84YJ9 | DR | potassium ion transmembrane transporter activity                                                                                                                                                                                               |
| P | Q869V1 | CC | May rather act as a symporter of protons and metal cations in an ATP-dependent process                                                                                                                                                         |
| P | Q869V1 | DE | Metal transporter nramp1 homolog;                                                                                                                                                                                                              |
| P | Q869W7 | CC | Sugar transporter that specifically mediates the transport of UDP-N-acetylglucosamine (UDP-GlcNAc) from cytosol into Golgi (By similarity).                                                                                                    |
| P | Q869W7 | DE | UDP-N-acetylglucosamine transporter slc35b4;                                                                                                                                                                                                   |
| P | Q86AZ6 | CC | Chloride channels may have several functions including the regulation of cell volume, membrane potential stabilization and signal transduction (By similarity).                                                                                |
| P | Q86AZ6 | CC | Voltage-gated chloride channel                                                                                                                                                                                                                 |
| P | Q86AZ6 | DE | Chloride channel protein B;                                                                                                                                                                                                                    |
| P | Q86AZ6 | DR | voltage-gated chloride channel activity                                                                                                                                                                                                        |
| P | Q86I81 | CC | Transports folate across the inner membranes of mitochondria (By similarity).                                                                                                                                                                  |
| P | Q86I81 | DE | Mitochondrial folate transporter A;                                                                                                                                                                                                            |
| P | Q86UD5 | CC | Electroneutral exchange of protons for Na <sup>+</sup> and Li <sup>+</sup> across the inner mitochondrial membrane                                                                                                                             |
| P | Q86UD5 | DE | Mitochondrial Na <sup>+</sup> /H <sup>+</sup> exchanger NHA2;                                                                                                                                                                                  |
| P | Q86UD5 | DE | Mitochondrial sodium/hydrogen exchanger NHA2;                                                                                                                                                                                                  |
| P | Q86UD5 | DE | Na <sup>+</sup> /H <sup>+</sup> exchanger-like domain-containing protein 2;                                                                                                                                                                    |
| P | Q86UD5 | DE | Sodium/hydrogen exchanger-like domain-containing protein 2;                                                                                                                                                                                    |
| P | Q86VS0 | DE | Sodium/hydrogen exchanger;                                                                                                                                                                                                                     |

|   |        |    |                                                                                                                                                                                                  |
|---|--------|----|--------------------------------------------------------------------------------------------------------------------------------------------------------------------------------------------------|
| P | Q86VS0 | DR | sodium:hydrogen antiporter activity                                                                                                                                                              |
| P | Q86VW1 | CC | High affinity carnitine transporter; the uptake is partially sodium-ion dependent                                                                                                                |
| P | Q86VW1 | DE | Carnitine transporter 2;                                                                                                                                                                         |
| P | Q86VW1 | DE | Organic cation/carnitine transporter 6;                                                                                                                                                          |
| P | Q86VW1 | DR | carnitine transporter activity                                                                                                                                                                   |
| P | Q86WA9 | CC | Exhibits sodium-independent sulfate anion transporter activity that may cooperate with SLC26A2 to mediate DIDS-sensitive sulfate uptake into high endothelial venules endothelial cells (HEVEC). |
| P | Q86WA9 | DE | Sodium-independent sulfate anion transporter;                                                                                                                                                    |
| P | Q86WA9 | DR | secondary active sulfate transmembrane transporter activity                                                                                                                                      |
| P | Q86WJ5 | DE | Hyperpolarization activated cyclic nucleotide-gated potassium channel;                                                                                                                           |
| P | Q86WJ5 | DR | voltage-gated potassium channel activity                                                                                                                                                         |
| P | Q86WJ6 | DE | Hyperpolarization activated cyclic nucleotide-gated potassium channel;                                                                                                                           |
| P | Q86WJ6 | DR | voltage-gated potassium channel activity                                                                                                                                                         |
| P | Q86Y85 | DE | Potassium voltage-gated channel, subfamily G, member 1;                                                                                                                                          |
| P | Q86Y85 | DR | voltage-gated potassium channel activity                                                                                                                                                         |
| P | Q86YT5 | CC | High-affinity sodium/citrate cotransporter that mediates citrate entry into cells                                                                                                                |
| P | Q86YT5 | CC | High-affinity sodium/citrate cotransporter that mediates citrate entry into cells                                                                                                                |
| P | Q86YT5 | CC | May facilitate the utilization of circulating citrate for the generation of metabolic energy and for the synthesis of fatty acids and cholesterol.                                               |
| P | Q86YT5 | CC | The transport process is electrogenic; it is the trivalent form of citrate rather than the divalent form that is recognized as a substrate                                                       |
| P | Q86YT5 | DE | Na <sup>+</sup> /citrate cotransporter;                                                                                                                                                          |
| P | Q86YT5 | DE | Na <sup>+</sup> /citrate cotransporter;                                                                                                                                                          |
| P | Q86YT5 | DE | Sodium-coupled citrate transporter;                                                                                                                                                              |
| P | Q86YT5 | DE | Sodium-coupled citrate transporter;                                                                                                                                                              |
| P | Q86YT5 | DE | Sodium-dependent citrate transporter;                                                                                                                                                            |
| P | Q86YT5 | DE | Sodium-dependent citrate transporter;                                                                                                                                                            |
| P | Q86YT5 | DR | citrate transmembrane transporter activity                                                                                                                                                       |
| P | Q87AL9 | CC | Part of the ABC transporter complex MetNIQ involved in methionine import                                                                                                                         |
| P | Q87AL9 | DE | Methionine import ATP-binding protein MetN;                                                                                                                                                      |
| P | Q87BH8 | CC | Part of the ABC transporter complex CcmAB involved in the biogenesis of c-type cytochromes; once thought to export heme, this seems not to be the case, but its exact role is uncertain          |
| P | Q87BH8 | DE | Heme exporter protein A;                                                                                                                                                                         |
| P | Q87BH8 | DR | heme-transporting ATPase activity                                                                                                                                                                |
| P | Q87C88 | CC | Part of the ABC transporter complex PstSACB involved in phosphate import                                                                                                                         |
| P | Q87C88 | DE | ABC phosphate transporter;                                                                                                                                                                       |
| P | Q87C88 | DE | Phosphate import ATP-binding protein PstB;                                                                                                                                                       |
| P | Q87C88 | DE | Phosphate-transporting ATPase;                                                                                                                                                                   |
| P | Q87C88 | DR | inorganic phosphate transmembrane transporter activity                                                                                                                                           |
| P | Q87C88 | DR | phosphate transmembrane-transporting ATPase activity                                                                                                                                             |
| P | Q87C89 | CC | Part of a binding-protein-dependent transport system for phosphate; probably responsible for the translocation of the substrate across the membrane (By similarity)                              |
| P | Q87C89 | DE | Phosphate transport system permease protein pstA;                                                                                                                                                |
| P | Q87C89 | DR | inorganic phosphate transmembrane transporter activity                                                                                                                                           |
| P | Q87C90 | CC | Part of a binding-protein-dependent transport system for phosphate; probably responsible for the translocation of the substrate across the membrane (By similarity)                              |
| P | Q87C90 | DE | Phosphate transport system permease protein pstC;                                                                                                                                                |
| P | Q87C90 | DR | inorganic phosphate transmembrane transporter activity                                                                                                                                           |
| P | Q87C91 | CC | Part of the ABC transporter complex pstSACB involved in phosphate import (By similarity).                                                                                                        |
| P | Q87C91 | DE | Phosphate-binding protein pstS;                                                                                                                                                                  |
| P | Q87C91 | DR | inorganic phosphate transmembrane transporter activity                                                                                                                                           |
| P | Q87D01 | CC | Transport of potassium into the cell (By similarity).                                                                                                                                            |
| P | Q87D01 | DE | Probable potassium transport system protein kup;                                                                                                                                                 |
| P | Q87D01 | DR | potassium ion transmembrane transporter activity                                                                                                                                                 |
| P | Q87DT9 | CC | Part of the ABC transporter complex CysAW involved in sulfate/thiosulfate import                                                                                                                 |
| P | Q87DT9 | DE | Sulfate-transporting ATPase;                                                                                                                                                                     |
| P | Q87DT9 | DE | Sulfate/thiosulfate import ATP-binding protein CysA;                                                                                                                                             |
| P | Q87DT9 | DR | sulfate transmembrane-transporting ATPase activity                                                                                                                                               |
| P | Q87EF4 | DE | Lipoprotein-releasing system ATP-binding protein LolD;                                                                                                                                           |
| P | Q87EF4 | DR | lipoprotein transporter activity                                                                                                                                                                 |
| P | Q87EJ9 | CC | H <sup>+</sup> -stimulated, highly selective, manganese uptake system (By similarity).                                                                                                           |
| P | Q87EJ9 | DE | Probable manganese transport protein mntH;                                                                                                                                                       |

|   |        |    |                                                                                                                                                                                         |
|---|--------|----|-----------------------------------------------------------------------------------------------------------------------------------------------------------------------------------------|
| P | Q87FK7 | DR | L-arabinose-importing ATPase activity                                                                                                                                                   |
| P | Q87FP8 | CC | Involved in the import of serine and threonine into the cell, with the concomitant import of sodium (symport system) (By similarity).                                                   |
| P | Q87FP8 | DE | Na <sup>+</sup> /serine-threonine symporter;                                                                                                                                            |
| P | Q87FP8 | DR | sodium:dicarboxylate symporter activity                                                                                                                                                 |
| P | Q87FP8 | DR | sodium:dicarboxylate symporter activity                                                                                                                                                 |
| P | Q87G59 | CC | Part of the ABC transporter complex PstSACB involved in phosphate import                                                                                                                |
| P | Q87G59 | DE | ABC phosphate transporter 2;                                                                                                                                                            |
| P | Q87G59 | DE | Phosphate import ATP-binding protein PstB 2;                                                                                                                                            |
| P | Q87G59 | DE | Phosphate-transporting ATPase 2;                                                                                                                                                        |
| P | Q87G59 | DR | inorganic phosphate transmembrane transporter activity                                                                                                                                  |
| P | Q87G59 | DR | phosphate transmembrane-transporting ATPase activity                                                                                                                                    |
| P | Q87GB5 | CC | Part of the ABC transporter complex MalEFGK involved in maltose/maltodextrin import                                                                                                     |
| P | Q87GB5 | DE | Maltose/maltodextrin import ATP-binding protein MalK;                                                                                                                                   |
| P | Q87GB5 | DR | maltose-transporting ATPase activity                                                                                                                                                    |
| P | Q87GB7 | DE | Maltose transport system permease protein malF;                                                                                                                                         |
| P | Q87GB8 | DE | Maltose transport system permease protein malG;                                                                                                                                         |
| P | Q87GZ9 | CC | Functions as antiport system and exchanges two chloride ions for 1 proton                                                                                                               |
| P | Q87GZ9 | CC | Proton-coupled chloride transporter                                                                                                                                                     |
| P | Q87GZ9 | DR | voltage-gated chloride channel activity                                                                                                                                                 |
| P | Q87H79 | CC | Part of the ABC transporter complex RbsABCD involved in ribose import                                                                                                                   |
| P | Q87H79 | DE | Ribose import ATP-binding protein RbsA;                                                                                                                                                 |
| P | Q87HN4 | CC | Part of the ABC transporter complex ModABC involved in molybdenum import                                                                                                                |
| P | Q87HN4 | DE | Molybdenum import ATP-binding protein ModC;                                                                                                                                             |
| P | Q87HN4 | DR | molybdenum ion transmembrane transporter activity                                                                                                                                       |
| P | Q87J32 | CC | Part of the ABC transporter complex HmuTUV involved in hemin import                                                                                                                     |
| P | Q87J32 | DE | Hemin import ATP-binding protein HmuV;                                                                                                                                                  |
| P | Q87MK8 | CC | Part of the ABC transporter complex CcmAB involved in the biogenesis of c-type cytochromes; once thought to export heme, this seems not to be the case, but its exact role is uncertain |
| P | Q87MK8 | DE | Heme exporter protein A;                                                                                                                                                                |
| P | Q87MK8 | DR | heme-transporting ATPase activity                                                                                                                                                       |
| P | Q87MQ5 | CC | Channel that permits osmotically driven movement of water in both directions                                                                                                            |
| P | Q87MQ5 | CC | It mediates rapid entry or exit of water in response to abrupt changes in osmolality (By similarity).                                                                                   |
| P | Q87N04 | CC | Na <sup>+</sup> /H <sup>+</sup> antiporter that extrudes sodium in exchange for external protons.                                                                                       |
| P | Q87N04 | DE | Na <sup>+</sup> /H <sup>+</sup> antiporter nhaB;                                                                                                                                        |
| P | Q87N04 | DE | Sodium/proton antiporter nhaB;                                                                                                                                                          |
| P | Q87N04 | DR | sodium:hydrogen antiporter activity                                                                                                                                                     |
| P | Q87PH3 | CC | Part of the ABC transporter complex PotABCD involved in                                                                                                                                 |
| P | Q87PH3 | CC | part of the ABC transporter complex PotABCD involved in                                                                                                                                 |
| P | Q87PH3 | DE | spermidine/putrescine import                                                                                                                                                            |
| P | Q87PH3 | DE | Spermidine/putrescine import ATP-binding protein PotA;                                                                                                                                  |
| P | Q87PH3 | DE | Spermidine/putrescine import ATP-binding protein PotA;                                                                                                                                  |
| P | Q87Q38 | CC | Part of the ABC transporter complex BtuCDF involved in vitamin B12 import                                                                                                               |
| P | Q87Q38 | DE | Vitamin B12 import ATP-binding protein BtuD;                                                                                                                                            |
| P | Q87Q38 | DE | Vitamin B12-transporting ATPase;                                                                                                                                                        |
| P | Q87Q39 | CC | Part of the ABC transporter complex BtuCDF involved in vitamin B12 import                                                                                                               |
| P | Q87Q39 | DE | Vitamin B12 import system permease protein BtuC;                                                                                                                                        |
| P | Q87R20 | DE | Lipoprotein-releasing system ATP-binding protein LolD;                                                                                                                                  |
| P | Q87R20 | DR | lipoprotein transporter activity                                                                                                                                                        |
| P | Q87RE5 | CC | Part of the ABC transporter complex ZnuABC involved in zinc import                                                                                                                      |
| P | Q87RE5 | DE | Zinc import ATP-binding protein ZnuC;                                                                                                                                                   |
| P | Q87RE5 | DR | zinc transporting ATPase activity                                                                                                                                                       |
| P | Q87RS1 | CC | Part of the ABC transporter complex MetNIQ involved in methionine import                                                                                                                |
| P | Q87RS1 | DE | Methionine import ATP-binding protein MetN;                                                                                                                                             |
| P | Q87RS1 | DR | D-methionine transmembrane transporter activity                                                                                                                                         |
| P | Q87S48 | CC | Part of the ABC transporter complex PstSACB involved in phosphate import                                                                                                                |
| P | Q87S48 | DE | ABC phosphate transporter 1;                                                                                                                                                            |
| P | Q87S48 | DE | Phosphate import ATP-binding protein PstB 1;                                                                                                                                            |
| P | Q87S48 | DE | Phosphate-transporting ATPase 1;                                                                                                                                                        |
| P | Q87S48 | DR | inorganic phosphate transmembrane transporter activity                                                                                                                                  |
| P | Q87S48 | DR | phosphate transmembrane-transporting ATPase activity                                                                                                                                    |
| P | Q87SE7 | CC | Binds vitamin B12 and delivers it to the periplasmic surface of BtuC (By similarity)                                                                                                    |
| P | Q87SE7 | CC | Part of the ABC transporter complex BtuCDF involved in vitamin B12 import                                                                                                               |
| P | Q87SV4 | CC | Part of the ABC transporter complex ThiBPQ involved in thiamine import                                                                                                                  |

|   |        |    |                                                                                                                                                                                                            |
|---|--------|----|------------------------------------------------------------------------------------------------------------------------------------------------------------------------------------------------------------|
| P | Q87SV4 | DE | Thiamine import ATP-binding protein ThiQ;                                                                                                                                                                  |
| P | Q87U31 | CC | Part of the ABC transporter complex PstSACB involved in phosphate import                                                                                                                                   |
| P | Q87U31 | DE | ABC phosphate transporter 2;                                                                                                                                                                               |
| P | Q87U31 | DE | Phosphate import ATP-binding protein PstB 2;                                                                                                                                                               |
| P | Q87U31 | DE | Phosphate-transporting ATPase 2;                                                                                                                                                                           |
| P | Q87U31 | DR | inorganic phosphate transmembrane transporter activity                                                                                                                                                     |
| P | Q87U31 | DR | phosphate transmembrane-transporting ATPase activity                                                                                                                                                       |
| P | Q87UH7 | CC | Part of the ABC transporter complex TauABC involved in taurine import                                                                                                                                      |
| P | Q87UH7 | DE | Taurine import ATP-binding protein TauB;                                                                                                                                                                   |
| P | Q87UH7 | DR | taurine-transporting ATPase activity                                                                                                                                                                       |
| P | Q87UN0 | CC | Part of the ABC transporter complex ZnuABC involved in zinc import                                                                                                                                         |
| P | Q87UN0 | DE | Zinc import ATP-binding protein ZnuC;                                                                                                                                                                      |
| P | Q87UN0 | DR | zinc transporting ATPase activity                                                                                                                                                                          |
| P | Q87UN4 | CC | Part of the ABC transporter complex MetNIQ involved in methionine import                                                                                                                                   |
| P | Q87UN4 | DE | Methionine import ATP-binding protein MetN 2;                                                                                                                                                              |
| P | Q87UV4 | CC | Part of the ABC transporter complex MetNIQ involved in methionine import                                                                                                                                   |
| P | Q87UV4 | DE | Methionine import ATP-binding protein MetN 1;                                                                                                                                                              |
| P | Q87UW8 | CC | Na <sup>+</sup> /H <sup>+</sup> antiporter that extrudes sodium in exchange for external protons (By similarity)                                                                                           |
| P | Q87UW8 | DE | Na <sup>+</sup> /H <sup>+</sup> antiporter nhaA 2;                                                                                                                                                         |
| P | Q87UW8 | DE | Sodium/proton antiporter nhaA 2;                                                                                                                                                                           |
| P | Q87WH3 | DE | Glycine betaine/choline OpuC ABC transporter, periplasmic substrate-binding protein                                                                                                                        |
| P | Q87WH3 | DE | Glycine betaine/choline OpuC ABC transporter, periplasmic substrate-binding protein                                                                                                                        |
| P | Q87WH4 | DE | Glycine betaine/choline OpuC ABC transporter, permease protein;                                                                                                                                            |
| P | Q87WH4 | DE | Glycine betaine/choline OpuC ABC transporter, permease protein;                                                                                                                                            |
| P | Q87WH5 | DE | Glycine betaine/choline OpuC ABC transporter, ATP-binding protein;                                                                                                                                         |
| P | Q87WH5 | DE | Glycine betaine/choline OpuC ABC transporter, ATP-binding protein;                                                                                                                                         |
| P | Q87WL3 | CC | Na <sup>+</sup> /H <sup>+</sup> antiporter that extrudes sodium in exchange for external protons (By similarity)                                                                                           |
| P | Q87WL3 | DE | Na <sup>+</sup> /H <sup>+</sup> antiporter nhaA 1;                                                                                                                                                         |
| P | Q87WL3 | DE | Sodium/proton antiporter nhaA 1;                                                                                                                                                                           |
| P | Q87Y19 | CC | Transport of potassium into the cell (By similarity).                                                                                                                                                      |
| P | Q87Y19 | DE | Probable potassium transport system protein kup;                                                                                                                                                           |
| P | Q87Y19 | DR | potassium ion transmembrane transporter activity                                                                                                                                                           |
| P | Q87Z03 | CC | Part of the ABC transporter complex CcmAB involved in the biogenesis of c-type cytochromes; once thought to export heme, this seems not to be the case, but its exact role is uncertain                    |
| P | Q87Z03 | DE | Heme exporter protein A;                                                                                                                                                                                   |
| P | Q87Z03 | DR | heme-transporting ATPase activity                                                                                                                                                                          |
| P | Q880A6 | CC | Part of the ABC transporter complex PstSACB involved in phosphate import                                                                                                                                   |
| P | Q880A6 | DE | ABC phosphate transporter 1;                                                                                                                                                                               |
| P | Q880A6 | DE | Phosphate import ATP-binding protein PstB 1;                                                                                                                                                               |
| P | Q880A6 | DE | Phosphate-transporting ATPase 1;                                                                                                                                                                           |
| P | Q880A6 | DR | inorganic phosphate transmembrane transporter activity                                                                                                                                                     |
| P | Q880A6 | DR | phosphate transmembrane-transporting ATPase activity                                                                                                                                                       |
| P | Q880Z2 | CC | Part of the ABC transporter complex XylFGH involved in xylose import                                                                                                                                       |
| P | Q880Z2 | DE | Xylose import ATP-binding protein XylG;                                                                                                                                                                    |
| P | Q880Z2 | DR | D-xylose-importing ATPase activity                                                                                                                                                                         |
| P | Q881C1 | CC | Part of the ABC transporter complex ModABC involved in molybdenum import                                                                                                                                   |
| P | Q881C1 | DE | Molybdenum import ATP-binding protein ModC;                                                                                                                                                                |
| P | Q881C1 | DR | molybdenum ion transmembrane transporter activity                                                                                                                                                          |
| P | Q882I8 | DR | L-arabinose-importing ATPase activity                                                                                                                                                                      |
| P | Q882S0 | DR | phosphonate transmembrane-transporting ATPase activity                                                                                                                                                     |
| P | Q883V4 | CC | One of the components of the high-affinity ATP-driven potassium transport (or KDP) system, which catalyzes the hydrolysis of ATP coupled with the exchange of hydrogen and potassium ions                  |
| P | Q883V4 | DE | Potassium-binding and translocating subunit C;                                                                                                                                                             |
| P | Q883V4 | DE | Potassium-translocating ATPase C chain;                                                                                                                                                                    |
| P | Q883V4 | DE | Potassium-transporting ATPase C chain;                                                                                                                                                                     |
| P | Q883V4 | DR | potassium-transporting ATPase activity                                                                                                                                                                     |
| P | Q883V6 | CC | One of the components of the high-affinity ATP-driven potassium transport (or KDP) system, which catalyzes the hydrolysis of ATP coupled with the exchange of hydrogen and potassium ions (By similarity). |
| P | Q883V6 | DE | Potassium-binding and translocating subunit A;                                                                                                                                                             |
| P | Q883V6 | DE | Potassium-translocating ATPase A chain;                                                                                                                                                                    |
| P | Q883V6 | DE | Potassium-transporting ATPase A chain;                                                                                                                                                                     |
| P | Q883V6 | DR | potassium-transporting ATPase activity                                                                                                                                                                     |

|   |        |    |                                                                                                                                                                                                            |
|---|--------|----|------------------------------------------------------------------------------------------------------------------------------------------------------------------------------------------------------------|
| P | Q884I3 | DE | Lipoprotein-releasing system ATP-binding protein LolD;                                                                                                                                                     |
| P | Q884I3 | DR | lipoprotein transporter activity                                                                                                                                                                           |
| P | Q888L8 | CC | The physiological role may be the reduction of the intracellular concentration of toxic sugars or sugar metabolites (By similarity).                                                                       |
| P | Q888L8 | DE | Probable sugar efflux transporter;                                                                                                                                                                         |
| P | Q889G0 | DR | phosphonate transmembrane-transporting ATPase activity                                                                                                                                                     |
| P | Q88AS5 | CC | Part of the ABC transporter complex CysAW 1F involved in sulfate/inosulfate import                                                                                                                         |
| P | Q88AS5 | DE | Sulfate-transporting ATPase;                                                                                                                                                                               |
| P | Q88AS5 | DE | Sulfate/thiosulfate import ATP-binding protein CysA;                                                                                                                                                       |
| P | Q88AS5 | DR | sulfate transmembrane-transporting ATPase activity                                                                                                                                                         |
| P | Q88C57 | CC | Part of the ABC transporter complex PstSACB involved in phosphate import                                                                                                                                   |
| P | Q88C57 | DE | ABC phosphate transporter 2;                                                                                                                                                                               |
| P | Q88C57 | DE | Phosphate import ATP-binding protein PstB 2;                                                                                                                                                               |
| P | Q88C57 | DE | Phosphate-transporting ATPase 2;                                                                                                                                                                           |
| P | Q88C57 | DR | inorganic phosphate transmembrane transporter activity                                                                                                                                                     |
| P | Q88C57 | DR | phosphate transmembrane-transporting ATPase activity                                                                                                                                                       |
| P | Q88CL2 | CC | Part of the ABC transporter complex CysAW 1F involved in sulfate/inosulfate import                                                                                                                         |
| P | Q88CL2 | DE | Sulfate-transporting ATPase;                                                                                                                                                                               |
| P | Q88CL2 | DE | Sulfate/thiosulfate import ATP-binding protein CysA;                                                                                                                                                       |
| P | Q88CL2 | DR | sulfate transmembrane-transporting ATPase activity                                                                                                                                                         |
| P | Q88CP1 | DE | Cadmium translocating P-type ATPase;                                                                                                                                                                       |
| P | Q88DY1 | CC | Part of the ABC transporter complex HmuTUV involved in hemin import                                                                                                                                        |
| P | Q88DY1 | DE | Hemin import ATP-binding protein HmuV;                                                                                                                                                                     |
| P | Q88EX5 | CC | Part of the ABC transporter complex CcmAB involved in the biogenesis of c-type cytochromes; once thought to export heme, this seems not to be the case, but its exact role is uncertain                    |
| P | Q88EX5 | DE | Heme exporter protein A;                                                                                                                                                                                   |
| P | Q88EX5 | DR | heme-transporting ATPase activity                                                                                                                                                                          |
| P | Q88FD7 | CC | One of the components of the high-affinity ATP-driven potassium transport (or KDP) system, which catalyzes the hydrolysis of ATP coupled with the exchange of hydrogen and potassium ions (By similarity). |
| P | Q88FD7 | DE | Potassium-binding and translocating subunit A;                                                                                                                                                             |
| P | Q88FD7 | DE | Potassium-translocating ATPase A chain;                                                                                                                                                                    |
| P | Q88FD7 | DE | Potassium-transporting ATPase A chain;                                                                                                                                                                     |
| P | Q88FD7 | DR | potassium-transporting ATPase activity                                                                                                                                                                     |
| P | Q88FD8 | CC | One of the components of the high-affinity ATP-driven potassium transport (or KDP) system, which catalyzes the hydrolysis of ATP coupled with the exchange of hydrogen and potassium ions                  |
| P | Q88FD8 | DE | Potassium-binding and translocating subunit C;                                                                                                                                                             |
| P | Q88FD8 | DE | Potassium-translocating ATPase C chain;                                                                                                                                                                    |
| P | Q88FD8 | DE | Potassium-transporting ATPase C chain;                                                                                                                                                                     |
| P | Q88FD8 | DR | potassium-transporting ATPase activity                                                                                                                                                                     |
| P | Q88FQ6 | CC | Na <sup>+</sup> /H <sup>+</sup> antiporter that extrudes sodium in exchange for external protons (By similarity)                                                                                           |
| P | Q88FQ6 | DE | Na <sup>+</sup> /H <sup>+</sup> antiporter nhaB;                                                                                                                                                           |
| P | Q88FQ6 | DE | Sodium/proton antiporter nhaB;                                                                                                                                                                             |
| P | Q88FQ6 | DR | sodium:hydrogen antiporter activity                                                                                                                                                                        |
| P | Q88G95 | DR | molybdate transmembrane-transporting ATPase activity                                                                                                                                                       |
| P | Q88HL0 | CC | Part of the ABC transporter complex NikABCDE involved in nickel import                                                                                                                                     |
| P | Q88HL0 | DE | Nickel import ATP-binding protein NikE;                                                                                                                                                                    |
| P | Q88HL0 | DR | nickel-transporting ATPase activity                                                                                                                                                                        |
| P | Q88HL1 | CC | Part of the ABC transporter complex NikABCDE involved in nickel import                                                                                                                                     |
| P | Q88HL1 | DE | Nickel import ATP-binding protein NikD;                                                                                                                                                                    |
| P | Q88HL1 | DR | nickel-transporting ATPase activity                                                                                                                                                                        |
| P | Q88J90 | CC | Part of the ABC transporter complex RbsABCD involved in ribose import                                                                                                                                      |
| P | Q88J90 | DE | Ribose import ATP-binding protein RbsA;                                                                                                                                                                    |
| P | Q88JJ0 | CC | Part of the ABC transporter complex PstSACB involved in phosphate import                                                                                                                                   |
| P | Q88JJ0 | DE | ABC phosphate transporter 1;                                                                                                                                                                               |
| P | Q88JJ0 | DE | Phosphate import ATP-binding protein PstB 1;                                                                                                                                                               |
| P | Q88JJ0 | DE | Phosphate-transporting ATPase 1;                                                                                                                                                                           |
| P | Q88JJ0 | DR | inorganic phosphate transmembrane transporter activity                                                                                                                                                     |
| P | Q88JJ0 | DR | phosphate transmembrane-transporting ATPase activity                                                                                                                                                       |
| P | Q88K49 | CC | Involved in the import of serine and threonine into the cell, with the concomitant import of sodium (symport system) (By similarity).                                                                      |
| P | Q88K49 | DE | Na <sup>+</sup> /serine-threonine symporter;                                                                                                                                                               |
| P | Q88K49 | DR | sodium:dicarboxylate symporter activity                                                                                                                                                                    |

|   |        |    |                                                                                                                                      |
|---|--------|----|--------------------------------------------------------------------------------------------------------------------------------------|
| P | Q88K49 | DR | sodium:dicarboxylate symporter activity                                                                                              |
| P | Q88K63 | CC | The physiological role may be the reduction of the intracellular concentration of toxic sugars or sugar metabolites (By similarity). |
| P | Q88K63 | DE | Probable sugar efflux transporter;                                                                                                   |
| P | Q88KY4 | DE | Lipoprotein-releasing system ATP-binding protein LolD;                                                                               |
| P | Q88KY4 | DR | lipoprotein transporter activity                                                                                                     |
| P | Q88NK7 | CC | Transport of potassium into the cell (By similarity).                                                                                |
| P | Q88NK7 | DE | Probable potassium transport system protein kup;                                                                                     |
| P | Q88NK7 | DR | potassium ion transmembrane transporter activity                                                                                     |
| P | Q88NS2 | CC | Na <sup>+</sup> /H <sup>+</sup> antiporter that extrudes sodium in exchange for external protons (By similarity)                     |
| P | Q88NS2 | DE | Na <sup>+</sup> /H <sup>+</sup> antiporter nhaA 1;                                                                                   |
| P | Q88NS2 | DE | Sodium/proton antiporter nhaA 1;                                                                                                     |
| P | Q88PM5 | DR | phosphonate transmembrane-transporting ATPase activity                                                                               |
| P | Q88RA1 | CC | Part of the ABC transporter complex TauABC involved in taurine import                                                                |
| P | Q88RA1 | DE | Taurine import ATP-binding protein TauB;                                                                                             |
| P | Q88RA1 | DR | taurine-transporting ATPase activity                                                                                                 |
| P | Q88RB3 | CC | Part of the ABC transporter complex MetNIQ involved in methionine import                                                             |
| P | Q88RB3 | DE | Methionine import ATP-binding protein MetN 2;                                                                                        |
| P | Q88RL1 | CC | Part of the ABC transporter complex ZnuABC involved in zinc import                                                                   |
| P | Q88RL1 | DE | Zinc import ATP-binding protein ZnuC;                                                                                                |
| P | Q88RL1 | DR | zinc transporting ATPase activity                                                                                                    |
| P | Q88RL5 | CC | Part of the ABC transporter complex MetNIQ involved in methionine import                                                             |
| P | Q88RL5 | DE | Methionine import ATP-binding protein MetN 1;                                                                                        |
| P | Q88RT8 | DE | Cadmium translocating P-type ATPase;                                                                                                 |
| P | Q88SV0 | CC | Transport of potassium into the cell (By similarity).                                                                                |
| P | Q88SV0 | DE | Probable potassium transport system protein kup 2;                                                                                   |
| P | Q88SV0 | DR | potassium ion transmembrane transporter activity                                                                                     |
| P | Q88UV2 | CC | Part of the ABC transporter complex MetNIQ involved in methionine import                                                             |
| P | Q88UV2 | DE | Methionine import ATP-binding protein MetN 2;                                                                                        |
| P | Q88WA5 | CC | Part of the ABC transporter complex MetNIQ involved in methionine import                                                             |
| P | Q88WA5 | DE | Methionine import ATP-binding protein MetN 1;                                                                                        |
| P | Q88YK7 | CC | Part of the ABC transporter complex PstSACB involved in phosphate import                                                             |
| P | Q88YK7 | DE | ABC phosphate transporter 2;                                                                                                         |
| P | Q88YK7 | DE | Phosphate import ATP-binding protein PstB 2;                                                                                         |
| P | Q88YK7 | DE | Phosphate-transporting ATPase 2;                                                                                                     |
| P | Q88YK7 | DR | inorganic phosphate transmembrane transporter activity                                                                               |
| P | Q88YK7 | DR | phosphate transmembrane-transporting ATPase activity                                                                                 |
| P | Q88YK8 | CC | Part of the ABC transporter complex PstSACB involved in phosphate import                                                             |
| P | Q88YK8 | DE | ABC phosphate transporter 1;                                                                                                         |
| P | Q88YK8 | DE | Phosphate import ATP-binding protein PstB 1;                                                                                         |
| P | Q88YK8 | DE | Phosphate-transporting ATPase 1;                                                                                                     |
| P | Q88YK8 | DR | inorganic phosphate transmembrane transporter activity                                                                               |
| P | Q88YK8 | DR | phosphate transmembrane-transporting ATPase activity                                                                                 |
| P | Q88YN5 | DR | phosphonate transmembrane-transporting ATPase activity                                                                               |
| P | Q88Z42 | CC | Transport of potassium into the cell (By similarity).                                                                                |
| P | Q88Z42 | DE | Probable potassium transport system protein kup 1;                                                                                   |
| P | Q88Z42 | DR | potassium ion transmembrane transporter activity                                                                                     |
| P | Q88ZJ6 | CC | Part of the ABC transporter complex PotABCD involved in spermidine/putrescine import                                                 |
| P | Q88ZJ6 | CC | Part of the ABC transporter complex PotABCD involved in spermidine/putrescine import                                                 |
| P | Q88ZJ6 | DE | Spermidine/putrescine import ATP-binding protein PotA;                                                                               |
| P | Q88ZJ6 | DE | Spermidine/putrescine import ATP-binding protein PotA;                                                                               |
| P | Q891M1 | CC | Part of the ABC transporter complex RbsABCD involved in ribose import                                                                |
| P | Q891M1 | DE | Ribose import ATP-binding protein RbsA;                                                                                              |
| P | Q895C4 | CC | Part of the ABC transporter complex MetNIQ involved in methionine import                                                             |
| P | Q895C4 | DE | Methionine import ATP-binding protein MetN;                                                                                          |
| P | Q895Y0 | CC | Part of the ABC transporter complex PstSACB involved in phosphate import                                                             |
| P | Q895Y0 | DE | ABC phosphate transporter;                                                                                                           |
| P | Q895Y0 | DE | Phosphate import ATP-binding protein PstB;                                                                                           |
| P | Q895Y0 | DE | Phosphate-transporting ATPase;                                                                                                       |
| P | Q895Y0 | DR | inorganic phosphate transmembrane transporter activity                                                                               |
| P | Q895Y0 | DR | phosphate transmembrane-transporting ATPase activity                                                                                 |
| P | Q896Y2 | CC | Part of the ABC transporter complex MglABC involved in galactose/methyl galactoside import                                           |
| P | Q896Y2 | DE | Galactose/methyl galactoside import ATP-binding protein MglA;                                                                        |
| P | Q89A24 | CC | Low-affinity inorganic phosphate transport (By similarity).                                                                          |

|   |        |    |                                                                                                                                                                                                            |
|---|--------|----|------------------------------------------------------------------------------------------------------------------------------------------------------------------------------------------------------------|
| P | Q89A24 | DE | Low-affinity inorganic phosphate transporter;                                                                                                                                                              |
| P | Q89A24 | DR | inorganic phosphate transmembrane transporter activity                                                                                                                                                     |
| P | Q89A36 | CC | This system is involved in mannitol transport (By similarity).                                                                                                                                             |
| P | Q89A36 | DE | Mannitol permease IIC component;                                                                                                                                                                           |
| P | Q89A36 | DE | Mannitol-specific phosphotransferase enzyme IIA component;                                                                                                                                                 |
| P | Q89A36 | DE | Mannitol-specific phosphotransferase enzyme IIB component;                                                                                                                                                 |
| P | Q89A36 | DE | PTS system mannitol-specific EIIA component;                                                                                                                                                               |
| P | Q89A36 | DE | PTS system mannitol-specific EIIB component;                                                                                                                                                               |
| P | Q89A36 | DE | PTS system mannitol-specific EIIC component;                                                                                                                                                               |
| P | Q89A36 | DE | PTS system mannitol-specific EIICBA component;                                                                                                                                                             |
| P | Q89AG6 | CC | This system is involved in glucose transport (By similarity).                                                                                                                                              |
| P | Q89AG6 | DE | Glucose permease IIC component;                                                                                                                                                                            |
| P | Q89AG6 | DE | Glucose-specific phosphotransferase enzyme IIB component;                                                                                                                                                  |
| P | Q89AG6 | DE | PTS system glucose-specific EIIB component;                                                                                                                                                                |
| P | Q89AG6 | DE | PTS system glucose-specific EIIC component;                                                                                                                                                                |
| P | Q89AG6 | DE | PTS system glucose-specific EIICB component;                                                                                                                                                               |
| P | Q89AG6 | DR | glucose transmembrane transporter activity                                                                                                                                                                 |
| P | Q89AJ0 | CC | Part of the ABC transporter complex ZnuABC involved in zinc import                                                                                                                                         |
| P | Q89AJ0 | DE | Zinc import ATP-binding protein ZnuC;                                                                                                                                                                      |
| P | Q89AJ0 | DR | zinc transporting ATPase activity                                                                                                                                                                          |
| P | Q89AJ1 | CC | Involved in the high-affinity zinc uptake transport system (By similarity).                                                                                                                                |
| P | Q89AJ1 | DE | High-affinity zinc uptake system membrane protein znuB;                                                                                                                                                    |
| P | Q89B05 | CC | This system is involved in glucose transport (By similarity).                                                                                                                                              |
| P | Q89B05 | DE | Glucose-specific phosphotransferase enzyme IIA component;                                                                                                                                                  |
| P | Q89B05 | DE | PTS system glucose-specific EIIA component;                                                                                                                                                                |
| P | Q89C51 | DR | phosphonate transmembrane-transporting ATPase activity                                                                                                                                                     |
| P | Q89EG9 | CC | Channel that permits osmotically driven movement of water in both directions                                                                                                                               |
| P | Q89EG9 | CC | It mediates rapid entry or exit of water in response to abrupt changes in osmolarity (By similarity).                                                                                                      |
| P | Q89EW7 | CC | Part of the ABC transporter complex ModABC involved in molybdenum import                                                                                                                                   |
| P | Q89EW7 | DE | Molybdenum import ATP-binding protein ModC 2;                                                                                                                                                              |
| P | Q89EW7 | DR | molybdenum ion transmembrane transporter activity                                                                                                                                                          |
| P | Q89FC2 | CC | One of the components of the high-affinity ATP-driven potassium transport (or KDP) system, which catalyzes the hydrolysis of ATP coupled with the exchange of hydrogen and potassium ions (By similarity). |
| P | Q89FC2 | DE | Potassium-binding and translocating subunit A;                                                                                                                                                             |
| P | Q89FC2 | DE | Potassium-translocating ATPase A chain;                                                                                                                                                                    |
| P | Q89FC2 | DE | Potassium-transporting ATPase A chain;                                                                                                                                                                     |
| P | Q89FC2 | DR | potassium-transporting ATPase activity                                                                                                                                                                     |
| P | Q89FC4 | CC | One of the components of the high-affinity ATP-driven potassium transport (or KDP) system, which catalyzes the hydrolysis of ATP coupled with the exchange of hydrogen and potassium ions                  |
| P | Q89FC4 | DE | Potassium-binding and translocating subunit C;                                                                                                                                                             |
| P | Q89FC4 | DE | Potassium-translocating ATPase C chain;                                                                                                                                                                    |
| P | Q89FC4 | DE | Potassium-transporting ATPase C chain;                                                                                                                                                                     |
| P | Q89FC4 | DR | potassium-transporting ATPase activity                                                                                                                                                                     |
| P | Q89K67 | CC | H+-stimulated, highly selective, manganese uptake system (By similarity).                                                                                                                                  |
| P | Q89K67 | DE | Probable manganese transport protein mntH;                                                                                                                                                                 |
| P | Q89KN0 | DE | Lipoprotein-releasing system ATP-binding protein LolD;                                                                                                                                                     |
| P | Q89KN0 | DR | lipoprotein transporter activity                                                                                                                                                                           |
| P | Q89L53 | CC | Transport of potassium into the cell (By similarity).                                                                                                                                                      |
| P | Q89L53 | DE | Probable potassium transport system protein kup 3;                                                                                                                                                         |
| P | Q89L53 | DR | potassium ion transmembrane transporter activity                                                                                                                                                           |
| P | Q89LP2 | CC | Part of the ABC transporter complex MetNIQ involved in methionine import                                                                                                                                   |
| P | Q89LP2 | DE | Methionine import ATP-binding protein MetN;                                                                                                                                                                |
| P | Q89NN5 | CC | Transport of potassium into the cell (By similarity).                                                                                                                                                      |
| P | Q89NN5 | DE | Probable potassium transport system protein kup 2;                                                                                                                                                         |
| P | Q89NN5 | DR | potassium ion transmembrane transporter activity                                                                                                                                                           |
| P | Q89NN6 | CC | Transport of potassium into the cell (By similarity).                                                                                                                                                      |
| P | Q89NN6 | DE | Probable potassium transport system protein kup 1;                                                                                                                                                         |
| P | Q89NN6 | DR | potassium ion transmembrane transporter activity                                                                                                                                                           |
| P | Q89TQ9 | CC | Part of the ABC transporter complex ModABC involved in molybdenum import                                                                                                                                   |
| P | Q89TQ9 | DE | molybdenum import ATP-binding protein ModC 1;                                                                                                                                                              |
| P | Q89TQ9 | DR | molybdenum ion transmembrane transporter activity                                                                                                                                                          |
| P | Q89UD2 | CC | Part of the ABC transporter complex CysAW 1F involved in sulfate/inosulfate import                                                                                                                         |

|   |        |    |                                                                                                                                                                                                            |
|---|--------|----|------------------------------------------------------------------------------------------------------------------------------------------------------------------------------------------------------------|
| P | Q89UD2 | DE | Sulfate-transporting ATPase;                                                                                                                                                                               |
| P | Q89UD2 | DE | Sulfate/thiosulfate import ATP-binding protein CysA;                                                                                                                                                       |
| P | Q89UD2 | DR | sulfate transmembrane-transporting ATPase activity                                                                                                                                                         |
| P | Q89VF2 | CC | Part of the ABC transporter complex PstSACB involved in phosphate import                                                                                                                                   |
| P | Q89VF2 | DE | ABC phosphate transporter;                                                                                                                                                                                 |
| P | Q89VF2 | DE | Phosphate import ATP-binding protein PstB;                                                                                                                                                                 |
| P | Q89VF2 | DE | Phosphate-transporting ATPase;                                                                                                                                                                             |
| P | Q89VF2 | DR | inorganic phosphate transmembrane transporter activity                                                                                                                                                     |
| P | Q89VF2 | DR | phosphate transmembrane-transporting ATPase activity                                                                                                                                                       |
| P | Q89WG0 | DR | glycerol-3-phosphate-transporting ATPase activity                                                                                                                                                          |
| P | Q8A1M1 | DE | Lipoprotein-releasing system ATP-binding protein LolD;                                                                                                                                                     |
| P | Q8A1M1 | DR | lipoprotein transporter activity                                                                                                                                                                           |
| P | Q8A519 | CC | One of the components of the high-affinity ATP-driven potassium transport (or KDP) system, which catalyzes the hydrolysis of ATP coupled with the exchange of hydrogen and potassium ions (By similarity). |
| P | Q8A519 | DE | Potassium-binding and translocating subunit A;                                                                                                                                                             |
| P | Q8A519 | DE | Potassium-translocating ATPase A chain;                                                                                                                                                                    |
| P | Q8A519 | DE | Potassium-transporting ATPase A chain;                                                                                                                                                                     |
| P | Q8A519 | DR | potassium-transporting ATPase activity                                                                                                                                                                     |
| P | Q8A521 | CC | One of the components of the high-affinity ATP-driven potassium transport (or KDP) system, which catalyzes the hydrolysis of ATP coupled with the exchange of hydrogen and potassium ions                  |
| P | Q8A521 | DE | Potassium-binding and translocating subunit C;                                                                                                                                                             |
| P | Q8A521 | DE | Potassium-translocating ATPase C chain;                                                                                                                                                                    |
| P | Q8A521 | DE | Potassium-transporting ATPase C chain;                                                                                                                                                                     |
| P | Q8A521 | DR | potassium-transporting ATPase activity                                                                                                                                                                     |
| P | Q8A853 | CC | Part of the ABC transporter complex PstSACB involved in phosphate import                                                                                                                                   |
| P | Q8A853 | DE | ABC phosphate transporter;                                                                                                                                                                                 |
| P | Q8A853 | DE | Phosphate import ATP-binding protein PstB;                                                                                                                                                                 |
| P | Q8A853 | DE | Phosphate-transporting ATPase;                                                                                                                                                                             |
| P | Q8A853 | DR | inorganic phosphate transmembrane transporter activity                                                                                                                                                     |
| P | Q8A853 | DR | phosphate transmembrane-transporting ATPase activity                                                                                                                                                       |
| P | Q8A883 | CC | Part of the ABC transporter complex PotABCD involved in spermidine/putrescine import                                                                                                                       |
| P | Q8A883 | CC | Part of the ABC transporter complex PotABCD involved in spermidine/putrescine import                                                                                                                       |
| P | Q8A883 | DE | Spermidine/putrescine import ATP-binding protein PotA;                                                                                                                                                     |
| P | Q8A883 | DE | Spermidine/putrescine import ATP-binding protein PotA;                                                                                                                                                     |
| P | Q8BFU8 | CC | Mediates the uptake of glutamate into synaptic vesicles at presynaptic nerve terminals of excitatory neural cells                                                                                          |
| P | Q8BFU8 | DE | Vesicular glutamate transporter 3;                                                                                                                                                                         |
| P | Q8BFU8 | DR | L-glutamate transmembrane transporter activity                                                                                                                                                             |
| P | Q8BFW9 | CC | Facilitative glucose transporter (By similarity).                                                                                                                                                          |
| P | Q8BFW9 | DE | Glucose transporter type 12;                                                                                                                                                                               |
| P | Q8BFW9 | DE | Solute carrier family 2, facilitated glucose transporter member 12;                                                                                                                                        |
| P | Q8BG16 | CC | Mediates the saturable, pH-sensitive and electrogenic cotransport of proline and sodium ions with a stoichiometry of 1:1                                                                                   |
| P | Q8BG16 | DE | Sodium- and chloride-dependent neurotransmitter transporter NTT73;                                                                                                                                         |
| P | Q8BG16 | DE | Sodium-dependent neutral amino acid transporter B(0)AT2;                                                                                                                                                   |
| P | Q8BG16 | DR | neurotransmitter:sodium symporter activity                                                                                                                                                                 |
| P | Q8BG22 | CC | Play a role in modulating chloride current across the plasma membrane in a calcium-dependent manner, and cell adhesion                                                                                     |
| P | Q8BG22 | DR | chloride channel activity                                                                                                                                                                                  |
| P | Q8BGC3 | CC | Proton-linked monocarboxylate transporter                                                                                                                                                                  |
| P | Q8BGC3 | DE | Monocarboxylate transporter 12;                                                                                                                                                                            |
| P | Q8BGG0 | CC | Facilitates the accumulation of zinc from the cytoplasm into intracellular vesicles, being a zinc-efflux transporter                                                                                       |
| P | Q8BGG0 | CC | May be a major component for providing zinc to insulin maturation and/or storage processes in insulin-secreting pancreatic beta- cells (By similarity).                                                    |
| P | Q8BGG0 | DE | Zinc transporter 8;                                                                                                                                                                                        |
| P | Q8BGY9 | CC | Imports choline from the extracellular space to the neuron with high affinity                                                                                                                              |
| P | Q8BGY9 | CC | Sodium ion and chloride ion dependent.                                                                                                                                                                     |
| P | Q8BGY9 | DE | Hemicholinium-3-sensitive choline transporter;                                                                                                                                                             |
| P | Q8BGY9 | DE | High affinity choline transporter 1;                                                                                                                                                                       |
| P | Q8BH59 | CC | Calcium-dependent mitochondrial aspartate and glutamate carrier                                                                                                                                            |
| P | Q8BH59 | DE | Mitochondrial aspartate glutamate carrier 1;                                                                                                                                                               |
| P | Q8BH59 | DR | L-glutamate transmembrane transporter activity                                                                                                                                                             |



|   |         |    |                                                                                                                                                                                                             |
|---|---------|----|-------------------------------------------------------------------------------------------------------------------------------------------------------------------------------------------------------------|
| P | Q8BHB9  | CC | May insert into membranes and form chloride ion channels                                                                                                                                                    |
| P | Q8BHB9  | CC | May play a critical role in water-secreting cells, possibly through the regulation of chloride ion transport (By similarity).                                                                               |
| P | Q8BHB9  | DE | Chloride intracellular channel protein 6;                                                                                                                                                                   |
| P | Q8BHB9  | DR | voltage-gated chloride channel activity                                                                                                                                                                     |
| P | Q8BHJ7  | CC | GABA, the major inhibitory neurotransmitter in the vertebrate brain, mediates neuronal inhibition by binding to the GABA/benzodiazepine receptor and opening an integral chloride channel (By similarity).  |
| P | Q8BHJ7  | DR | chloride channel activity                                                                                                                                                                                   |
| P | Q8BHK1  | CC | Can also transport other divalent cations such as Fe(2+), Sr(2+), Ba(2+), Mn(2+) and Co(2+) but to a much less extent than Mg2+.                                                                            |
| P | Q8BHK1  | DE | Magnesium transporter NIPA1;                                                                                                                                                                                |
| P | Q8BIV7  | DE | Proton-associated sugar transporter A;                                                                                                                                                                      |
| P | Q8BJA2  | CC | Acts as a magnesium transporter that is responsive to magnesium balance (By similarity).                                                                                                                    |
| P | Q8BJI1  | DE | Sodium-dependent neurotransmitter transporter NTT4;                                                                                                                                                         |
| P | Q8BJI1  | DE | Sodium-dependent neutral amino acid transporter SLC6A17;                                                                                                                                                    |
| P | Q8BJI1  | DR | neurotransmitter:sodium symporter activity                                                                                                                                                                  |
| P | Q8BJM5  | CC | Zinc-efflux transporter which allocates the cytoplasmic zinc to the trans-Golgi network (TGN) as well as the vesicular compartment.                                                                         |
| P | Q8BJM5  | DE | Zinc transporter 6;                                                                                                                                                                                         |
| P | Q8BJM5  | DR | zinc ion transmembrane transporter activity                                                                                                                                                                 |
| P | Q8BL03  | DE | Mitochondrial carnitine/acylcarnitine carrier protein CACL;                                                                                                                                                 |
| P | Q8BL03  | DR | acyl carnitine transporter activity                                                                                                                                                                         |
| P | Q8BLE7  | CC | Mediates the uptake of glutamate into synaptic vesicles at presynaptic nerve terminals of excitatory neural cells                                                                                           |
| P | Q8BLE7  | DE | Vesicular glutamate transporter 2;                                                                                                                                                                          |
| P | Q8BLE7  | DR | L-glutamate transmembrane transporter activity                                                                                                                                                              |
| P | Q8BLV3  | CC | mediates electrochemical exchange of protons for Na+ and K+ across endomembranes                                                                                                                            |
| P | Q8BLV3  | DE | Na+/H+ exchanger 7;                                                                                                                                                                                         |
| P | Q8BLV3  | DE | Sodium/hydrogen exchanger 7;                                                                                                                                                                                |
| P | Q8BLV3  | DR | sodium:hydrogen antiporter activity                                                                                                                                                                         |
| P | Q8BMD8  | CC | May act as a ATP-Mg/Pi exchanger that mediates the transport of Mg-ATP in exchange for phosphate, catalyzing the net uptake or efflux of adenine nucleotides into or from the mitochondria (By similarity). |
| P | Q8BMG8  | CC | Transports folate across the inner membranes of mitochondria (By similarity).                                                                                                                               |
| P | Q8BMG8  | DE | Mitochondrial folate transporter/carrier;                                                                                                                                                                   |
| P | Q8BMW7  | CC | Can also transport other divalent cations such as Fe(2+), Sr(2+), Ba(2+), Mn(2+), Cu(2+) and Co(2+) but to a much less extent than Mg2+.                                                                    |
| P | Q8BMW7  | DE | Magnesium transporter NIPA3;                                                                                                                                                                                |
| P | Q8BPX9  | CC | Proton oligopeptide cotransporter                                                                                                                                                                           |
| P | Q8BQZ8  | CC | Potassium channel subunit                                                                                                                                                                                   |
| P | Q8BQZ8  | DE | Potassium voltage-gated channel subfamily S member 3;                                                                                                                                                       |
| P | Q8BQZ8  | DE | Voltage-gated potassium channel subunit Kv9.3;                                                                                                                                                              |
| P | Q8BQZ8  | DR | voltage-gated potassium channel activity                                                                                                                                                                    |
| P | Q8BUE1  | CC | In apical cell membrane may be involved in mediating sodium absorption                                                                                                                                      |
| P | Q8BUE1  | CC | major proton extruding system driven by the inward sodium ion chemical gradient                                                                                                                             |
| P | Q8BUE1  | DE | Na+/H+ exchanger 4;                                                                                                                                                                                         |
| P | Q8BUE1  | DE | Sodium/hydrogen exchanger 4;                                                                                                                                                                                |
| P | Q8BUE1  | DR | sodium:hydrogen antiporter activity                                                                                                                                                                         |
| P | Q8BWC0  | CC | nicotinic acid adenine dinucleotide phosphate (NADP+) receptor that may function as one of the major voltage-gated Ca2+ channels (VDCC) across the lysosomal membrane                                       |
| P | Q8BWC0  | DE | Two pore calcium channel protein 2;                                                                                                                                                                         |
| P | Q8BWC0  | DE | Voltage-dependent calcium channel protein TPC2;                                                                                                                                                             |
| P | Q8BWC0  | DR | calcium channel activity                                                                                                                                                                                    |
| P | Q8BWG9  | CC | CRAC channels are the main pathway for Ca2+ influx in T-cells and promote the immune response to pathogens by activating the transcription factor NFAT (By similarity).                                     |
| P | Q8BWG9  | CC | Ca2+ release-activated Ca2+ (CRAC) channel subunit which mediates Ca2+ influx following depletion of intracellular Ca2+ stores and channel activation by the Ca2+ sensor, STIM1                             |
| P | Q8BWG9  | DE | Calcium release-activated calcium channel protein 1;                                                                                                                                                        |
| P | Q8BWG9  | DR | store-operated calcium channel activity                                                                                                                                                                     |
| P | Q8BWY7  | DE | Zinc transporter ZIP11;                                                                                                                                                                                     |
| P | Q8B XK9 | CC | Can insert into membranes and form poorly selective ion channels that may also transport chloride ions                                                                                                      |

|   |        |    |                                                                                                                                                                                                                                                                                                                                                                                                                                                                                                                                                                                   |
|---|--------|----|-----------------------------------------------------------------------------------------------------------------------------------------------------------------------------------------------------------------------------------------------------------------------------------------------------------------------------------------------------------------------------------------------------------------------------------------------------------------------------------------------------------------------------------------------------------------------------------|
| P | Q8BXX9 | DE | Chloride intracellular channel protein 5;                                                                                                                                                                                                                                                                                                                                                                                                                                                                                                                                         |
| P | Q8BXX9 | DR | voltage-gated chloride channel activity                                                                                                                                                                                                                                                                                                                                                                                                                                                                                                                                           |
| P | Q8BY89 | CC | Putative choline transporter (By similarity).                                                                                                                                                                                                                                                                                                                                                                                                                                                                                                                                     |
| P | Q8BY89 | DE | Choline transporter-like protein 2;<br>Acts as an electrogenic sodium (Na <sup>+</sup> ) and chloride (Cl <sup>-</sup> )-dependent sodium-coupled solute transporter, including transport of monocarboxylates (short-chain fatty acids including L-lactate, D-lactate, pyruvate, acetate, propionate, valerate and butyrate), lactate, monocarboxylate drugs (nicotinate, benzoate, salicylate and 5-aminosalicylate) and ketone bodies (beta-D- hydroxybutyrate, acetoacetate and alpha-ketoisocaproate), with a Na <sup>+</sup> :substrate stoichiometry of between 4:1 and 2:1 |
| P | Q8BYF6 | CC | May play a critical role in the entry of L-lactate and ketone bodies into neurons by a process driven by an electrochemical Na <sup>+</sup> gradient and hence contribute to the maintenance of the energy status and function of neurons.                                                                                                                                                                                                                                                                                                                                        |
| P | Q8BYF6 | CC | Electrogenic sodium monocarboxylate cotransporter;                                                                                                                                                                                                                                                                                                                                                                                                                                                                                                                                |
| P | Q8BYF6 | DE | Sodium-coupled monocarboxylate transporter 1;                                                                                                                                                                                                                                                                                                                                                                                                                                                                                                                                     |
| P | Q8BYR8 | CC | Acts as a plasma-membrane magnesium transporter (By similarity).                                                                                                                                                                                                                                                                                                                                                                                                                                                                                                                  |
| P | Q8BZ00 | CC | May act in electroneutral exchange of protons for Na <sup>+</sup> across membranes                                                                                                                                                                                                                                                                                                                                                                                                                                                                                                |
| P | Q8BZ00 | DE | Na <sup>+</sup> /H <sup>+</sup> exchanger 9;                                                                                                                                                                                                                                                                                                                                                                                                                                                                                                                                      |
| P | Q8BZ00 | DE | Sodium/hydrogen exchanger 9;                                                                                                                                                                                                                                                                                                                                                                                                                                                                                                                                                      |
| P | Q8BZ00 | DR | sodium:hydrogen antiporter activity                                                                                                                                                                                                                                                                                                                                                                                                                                                                                                                                               |
| P | Q8BZF2 | CC | Can also transport other divalent cations such as Ba(2+), Mn(2+), Sr(2+) and Co(2+) but to a much less extent than Mg2+                                                                                                                                                                                                                                                                                                                                                                                                                                                           |
| P | Q8BZF2 | DE | Magnesium transporter NIPA4;                                                                                                                                                                                                                                                                                                                                                                                                                                                                                                                                                      |
| P | Q8BZH0 | DE | Zinc transporter ZIP13;                                                                                                                                                                                                                                                                                                                                                                                                                                                                                                                                                           |
| P | Q8BZN2 | CC | Potassium channel subunit that does not form functional channels by itself                                                                                                                                                                                                                                                                                                                                                                                                                                                                                                        |
| P | Q8BZN2 | DE | Potassium voltage-gated channel subfamily V member 1;                                                                                                                                                                                                                                                                                                                                                                                                                                                                                                                             |
| P | Q8BZN2 | DE | Voltage-gated potassium channel subunit Kv8.1;                                                                                                                                                                                                                                                                                                                                                                                                                                                                                                                                    |
| P | Q8BZN2 | DR | voltage-gated potassium channel activity                                                                                                                                                                                                                                                                                                                                                                                                                                                                                                                                          |
| P | Q8C0X2 | DE | Na <sup>+</sup> /H <sup>+</sup> exchanger-like domain-containing protein 1;                                                                                                                                                                                                                                                                                                                                                                                                                                                                                                       |
| P | Q8C0X2 | DE | Sodium/hydrogen exchanger-like domain-containing protein 1;                                                                                                                                                                                                                                                                                                                                                                                                                                                                                                                       |
| P | Q8C145 | DE | Zinc transporter ZIP6;                                                                                                                                                                                                                                                                                                                                                                                                                                                                                                                                                            |
| P | Q8C261 | CC | Probably transports 1 Ca2+ and 1 K+ in exchange for 4 Na+ (By similarity).                                                                                                                                                                                                                                                                                                                                                                                                                                                                                                        |
| P | Q8C261 | CC | Probably transports 1 Ca2+ and 1 K+ in exchange for 4 Na+ (By similarity).                                                                                                                                                                                                                                                                                                                                                                                                                                                                                                        |
| P | Q8C261 | CC | Probably transports 1 Ca2+ and 1 K+ in exchange for 4 Na+ (By similarity).                                                                                                                                                                                                                                                                                                                                                                                                                                                                                                        |
| P | Q8C261 | DE | Na <sup>+</sup> /K <sup>+</sup> /Ca2+-exchange protein 5;                                                                                                                                                                                                                                                                                                                                                                                                                                                                                                                         |
| P | Q8C261 | DE | Na <sup>+</sup> /K <sup>+</sup> /Ca2+-exchange protein 5;                                                                                                                                                                                                                                                                                                                                                                                                                                                                                                                         |
| P | Q8C261 | DE | Na <sup>+</sup> /K <sup>+</sup> /Ca2+-exchange protein 5;                                                                                                                                                                                                                                                                                                                                                                                                                                                                                                                         |
| P | Q8C261 | DE | Sodium/potassium/calcium exchanger 5;                                                                                                                                                                                                                                                                                                                                                                                                                                                                                                                                             |
| P | Q8C261 | DE | Sodium/potassium/calcium exchanger 5;                                                                                                                                                                                                                                                                                                                                                                                                                                                                                                                                             |
| P | Q8C261 | DE | Sodium/potassium/calcium exchanger 5;                                                                                                                                                                                                                                                                                                                                                                                                                                                                                                                                             |
| P | Q8C3K6 | CC | Actively transports glucose into cells by Na <sup>+</sup> cotransport with a Na <sup>+</sup> to glucose coupling ratio of 2:1                                                                                                                                                                                                                                                                                                                                                                                                                                                     |
| P | Q8C3K6 | CC | Actively transports glucose into cells by Na <sup>+</sup> cotransport with a Na <sup>+</sup> to glucose coupling ratio of 2:1                                                                                                                                                                                                                                                                                                                                                                                                                                                     |
| P | Q8C3K6 | CC | Efficient substrate transport in mammalian kidney is provided by the concerted action of a low affinity high capacity and a high affinity low capacity Na <sup>+</sup> /glucose cotransporter arranged in series along kidney proximal tubules.                                                                                                                                                                                                                                                                                                                                   |
| P | Q8C3K6 | CC | Efficient substrate transport in mammalian kidney is provided by the concerted action of a low affinity high capacity and a high affinity low capacity Na <sup>+</sup> /glucose cotransporter arranged in series along kidney proximal tubules.                                                                                                                                                                                                                                                                                                                                   |
| P | Q8C3K6 | DE | High affinity sodium-glucose cotransporter;                                                                                                                                                                                                                                                                                                                                                                                                                                                                                                                                       |
| P | Q8C3K6 | DE | Na <sup>+</sup> /glucose cotransporter 1;                                                                                                                                                                                                                                                                                                                                                                                                                                                                                                                                         |
| P | Q8C3K6 | DE | Na <sup>+</sup> /glucose cotransporter 1;                                                                                                                                                                                                                                                                                                                                                                                                                                                                                                                                         |
| P | Q8C3K6 | DE | Sodium/glucose cotransporter 1;                                                                                                                                                                                                                                                                                                                                                                                                                                                                                                                                                   |
| P | Q8C3K6 | DE | Sodium/glucose cotransporter 1;                                                                                                                                                                                                                                                                                                                                                                                                                                                                                                                                                   |
| P | Q8C4A0 | CC | Forms a water-specific channel that participates in distinct physiological functions such as glomerular filtration, tubular endocytosis and acid-base metabolism (By similarity)                                                                                                                                                                                                                                                                                                                                                                                                  |
| P | Q8C4A0 | DR | water channel activity                                                                                                                                                                                                                                                                                                                                                                                                                                                                                                                                                            |
| P | Q8CBB2 | CC | Proton oligopeptide cotransporter (Potential).                                                                                                                                                                                                                                                                                                                                                                                                                                                                                                                                    |
| P | Q8CE94 | CC | Proton-linked monocarboxylate transporter                                                                                                                                                                                                                                                                                                                                                                                                                                                                                                                                         |
| P | Q8CE94 | DE | Monocarboxylate transporter 13;                                                                                                                                                                                                                                                                                                                                                                                                                                                                                                                                                   |
| P | Q8CFS6 | CC | Potassium channel subunit                                                                                                                                                                                                                                                                                                                                                                                                                                                                                                                                                         |
| P | Q8CFS6 | DE | Potassium voltage-gated channel subfamily V member 2;                                                                                                                                                                                                                                                                                                                                                                                                                                                                                                                             |
| P | Q8CFS6 | DE | Voltage-gated potassium channel subunit Kv8.2;                                                                                                                                                                                                                                                                                                                                                                                                                                                                                                                                    |
| P | Q8CFS6 | DR | voltage-gated potassium channel activity                                                                                                                                                                                                                                                                                                                                                                                                                                                                                                                                          |

|   |        |    |                                                                                                                                                                      |
|---|--------|----|----------------------------------------------------------------------------------------------------------------------------------------------------------------------|
| P | Q8CGQ8 | CC | Transports 1 Ca <sup>2+</sup> and 1 K <sup>+</sup> in exchange for 4 Na <sup>+</sup> .                                                                               |
| P | Q8CGQ8 | CC | Transports 1 Ca <sup>2+</sup> and 1 K <sup>+</sup> in exchange for 4 Na <sup>+</sup> .                                                                               |
| P | Q8CGQ8 | CC | Transports 1 Ca <sup>2+</sup> and 1 K <sup>+</sup> in exchange for 4 Na <sup>+</sup> .                                                                               |
| P | Q8CGQ8 | DE | Na <sup>+</sup> /K <sup>+</sup> /Ca <sup>2+</sup> -exchange protein 4;                                                                                               |
| P | Q8CGQ8 | DE | Na <sup>+</sup> /K <sup>+</sup> /Ca <sup>2+</sup> -exchange protein 4;                                                                                               |
| P | Q8CGQ8 | DE | Na <sup>+</sup> /K <sup>+</sup> /Ca <sup>2+</sup> -exchange protein 4;                                                                                               |
| P | Q8CGQ8 | DE | Sodium/potassium/calcium exchanger 4;                                                                                                                                |
| P | Q8CGQ8 | DE | Sodium/potassium/calcium exchanger 4;                                                                                                                                |
| P | Q8CGQ8 | DE | Sodium/potassium/calcium exchanger 4;                                                                                                                                |
| P | Q8CIA5 | CC | Sugar transporter that specifically mediates the transport of UDP-xylose (UDP-Xyl) and UDP-N-acetylglucosamine (UDP-GlcNAc) from cytosol into Golgi (By similarity). |
| P | Q8CIA5 | CC | Sugar transporter that specifically mediates the transport of UDP-xylose (UDP-Xyl) and UDP-N-acetylglucosamine (UDP-GlcNAc) from cytosol into Golgi (By similarity). |
| P | Q8CIA5 | DE | UDP-xylose and UDP-N-acetylglucosamine transporter;                                                                                                                  |
| P | Q8CIA5 | DE | UDP-xylose and UDP-N-acetylglucosamine transporter;                                                                                                                  |
| P | Q8CIA9 | DR | tetracycline:hydrogen antiporter activity                                                                                                                            |
| P | Q8CMU4 | DR | phosphonate transmembrane-transporting ATPase activity                                                                                                               |
| P | Q8CN02 | CC | Involved in copper export (By similarity).                                                                                                                           |
| P | Q8CN02 | DE | Copper-exporting P-type ATPase A;                                                                                                                                    |
| P | Q8CN02 | DR | copper-exporting ATPase activity                                                                                                                                     |
| P | Q8CN76 | CC | Also possibly involved in excretion of nitrite produced by the dissimilatory reduction of nitrate (By similarity).                                                   |
| P | Q8CN76 | CC | Probably required for nitrate uptake under anoxic conditions                                                                                                         |
| P | Q8CN76 | DE | Probable nitrate transporter narT;                                                                                                                                   |
| P | Q8CNF2 | CC | Involved in the uptake of glucose (By similarity).                                                                                                                   |
| P | Q8CNF2 | DE | Probable glucose uptake protein glcU;                                                                                                                                |
| P | Q8CNF6 | CC | This system is involved in lactose transport (By similarity).                                                                                                        |
| P | Q8CNF6 | DE | Lactose-specific phosphotransferase enzyme IIA component;                                                                                                            |
| P | Q8CNF6 | DE | PTS system lactose-specific EIIA component;                                                                                                                          |
| P | Q8CNF7 | CC | This system is involved in lactose transport.                                                                                                                        |
| P | Q8CNF7 | DE | Lactose permease IIC component;                                                                                                                                      |
| P | Q8CNF7 | DE | Lactose-specific phosphotransferase enzyme IIB component;                                                                                                            |
| P | Q8CNF7 | DE | PTS system lactose-specific EIIB component;                                                                                                                          |
| P | Q8CNF7 | DE | PTS system lactose-specific EIIC component;                                                                                                                          |
| P | Q8CNF7 | DE | PTS system lactose-specific EIICB component;                                                                                                                         |
| P | Q8CNP2 | CC | Catalyzes the sodium-dependent uptake of extracellular L-proline (By similarity).                                                                                    |
| P | Q8CNP2 | DE | Proline permease;                                                                                                                                                    |
| P | Q8CNP2 | DE | Sodium/proline symporter;                                                                                                                                            |
| P | Q8CNP2 | DE | Sodium/proline symporter;                                                                                                                                            |
| P | Q8CNP2 | DR | proline:sodium symporter activity                                                                                                                                    |
| P | Q8CNP2 | DR | proline:sodium symporter activity                                                                                                                                    |
| P | Q8CP79 | CC | This system is involved in glucose transport (By similarity).                                                                                                        |
| P | Q8CP79 | DE | Glucose-specific phosphotransferase enzyme IIA component;                                                                                                            |
| P | Q8CP79 | DE | PTS system glucose-specific EIIA component;                                                                                                                          |
| P | Q8CP98 | CC | Part of the ABC transporter complex pstSACB involved in phosphate import (By similarity).                                                                            |
| P | Q8CP98 | DE | Phosphate-binding protein pstS;                                                                                                                                      |
| P | Q8CPA1 | CC | Part of the ABC transporter complex PstSACB involved in phosphate import                                                                                             |
| P | Q8CPA1 | DE | ABC phosphate transporter;                                                                                                                                           |
| P | Q8CPA1 | DE | Phosphate import ATP-binding protein PstB;                                                                                                                           |
| P | Q8CPA1 | DE | Phosphate-transporting ATPase;                                                                                                                                       |
| P | Q8CPA1 | DR | inorganic phosphate transmembrane transporter activity                                                                                                               |
| P | Q8CPA1 | DR | phosphate transmembrane-transporting ATPase activity                                                                                                                 |
| P | Q8CPM6 | CC | H <sup>+</sup> -stimulated, highly selective, manganese uptake system (By similarity).                                                                               |
| P | Q8CPM6 | DE | Probable manganese transport protein mntH;                                                                                                                           |
| P | Q8CPN0 | CC | Part of the ABC transporter complex POTABCD involved in spermidine/putrescine import                                                                                 |
| P | Q8CPN0 | CC | Part of the ABC transporter complex POTABCD involved in spermidine/putrescine import                                                                                 |
| P | Q8CPN0 | DE | Spermidine/putrescine import ATP-binding protein PotA;                                                                                                               |
| P | Q8CPN0 | DE | Spermidine/putrescine import ATP-binding protein PotA;                                                                                                               |
| P | Q8CPU8 | CC | Mnh complex is a Na <sup>+</sup> /H <sup>+</sup> antiporter involved in Na <sup>+</sup> excretion (By similarity).                                                   |
| P | Q8CPU8 | DE | Na <sup>+</sup> /H <sup>+</sup> antiporter subunit A1;                                                                                                               |
| P | Q8CPU9 | CC | Mnh complex is a Na <sup>+</sup> /H <sup>+</sup> antiporter involved in Na <sup>+</sup> excretion (By similarity).                                                   |
| P | Q8CPU9 | DE | Na <sup>+</sup> /H <sup>+</sup> antiporter subunit B1;                                                                                                               |
| P | Q8CPV0 | CC | Mnh complex is a Na <sup>+</sup> /H <sup>+</sup> antiporter involved in Na <sup>+</sup> excretion (By similarity).                                                   |
| P | Q8CPV0 | DE | Na <sup>+</sup> /H <sup>+</sup> antiporter subunit C1;                                                                                                               |

|   |        |    |                                                                                                                    |
|---|--------|----|--------------------------------------------------------------------------------------------------------------------|
| P | Q8CPV1 | CC | Mnh complex is a Na <sup>+</sup> /H <sup>+</sup> antiporter involved in Na <sup>+</sup> excretion (By similarity). |
| P | Q8CPV1 | DE | Na <sup>+</sup> /H <sup>+</sup> antiporter subunit D1;                                                             |
| P | Q8CPV2 | CC | Mnh complex is a Na <sup>+</sup> /H <sup>+</sup> antiporter involved in Na <sup>+</sup> excretion (By similarity). |
| P | Q8CPV2 | DE | Na <sup>+</sup> /H <sup>+</sup> antiporter subunit E1;                                                             |
| P | Q8CPV3 | CC | Mnh complex is a Na <sup>+</sup> /H <sup>+</sup> antiporter involved in Na <sup>+</sup> excretion (By similarity). |
| P | Q8CPV3 | DE | Na <sup>+</sup> /H <sup>+</sup> antiporter subunit F1;                                                             |
| P | Q8CPV4 | CC | Mnh complex is a Na <sup>+</sup> /H <sup>+</sup> antiporter involved in Na <sup>+</sup> excretion (By similarity). |
| P | Q8CPV4 | DE | Na <sup>+</sup> /H <sup>+</sup> antiporter subunit G1;                                                             |
| P | Q8CQF4 | CC | Thought to form the channel of an arsenite pump.                                                                   |
| P | Q8CQF4 | DR | arsenite transmembrane transporter activity                                                                        |
| P | Q8CQF7 | CC | Involved in copper transport (By similarity).                                                                      |
| P | Q8CQF7 | DE | Probable copper-transporting P-type ATPase B;                                                                      |
| P | Q8CQF7 | DR | copper-exporting ATPase activity                                                                                   |
| P | Q8CQS7 | CC | Part of the ABC transporter complex MetNIQ involved in methionine import                                           |
| P | Q8CQS7 | DE | Methionine import ATP-binding protein MetN 2;                                                                      |
| P | Q8CTB2 | CC | Part of the ABC transporter complex MetNIQ involved in methionine import                                           |
| P | Q8CTB2 | DE | Methionine import ATP-binding protein MetN 1;                                                                      |
| P | Q8CUY0 | DR | phosphonate transmembrane-transporting ATPase activity                                                             |
| P | Q8CVC9 | CC | Part of the ABC transporter complex pstSACB involved in phosphate import (By similarity).                          |
| P | Q8CVC9 | DE | Phosphate-binding protein pstS 2;                                                                                  |
| P | Q8CZD5 | CC | This system is involved in glucose transport (By similarity).                                                      |
| P | Q8CZD5 | DE | Glucose-specific phosphotransferase enzyme IIA component;                                                          |
| P | Q8CZD5 | DE | PTS system glucose-specific EIIA component;                                                                        |
| P | Q8D0W8 | CC | Part of the ABC transporter complex CysAW 1F involved in sulfate/thiosulfate import                                |
| P | Q8D0W8 | DE | Sulfate-transporting ATPase;                                                                                       |
| P | Q8D0W8 | DE | Sulfate/thiosulfate import ATP-binding protein CysA;                                                               |
| P | Q8D0W8 | DR | sulfate transmembrane-transporting ATPase activity                                                                 |
| P | Q8D666 | CC | Na <sup>+</sup> /H <sup>+</sup> antiporter that extrudes sodium in exchange for external protons (By similarity)   |
| P | Q8D666 | DE | Na <sup>+</sup> /H <sup>+</sup> antiporter nhaA 2;                                                                 |
| P | Q8D666 | DE | Sodium/proton antiporter nhaA 2;                                                                                   |
| P | Q8D740 | CC | Part of the ABC transporter complex ModABC involved in molybdenum import                                           |
| P | Q8D740 | DE | Molybdenum import ATP-binding protein ModC;                                                                        |
| P | Q8D740 | DR | molybdenum ion transmembrane transporter activity                                                                  |
| P | Q8D8Y2 | CC | Na <sup>+</sup> /H <sup>+</sup> antiporter that extrudes sodium in exchange for external protons (By similarity)   |
| P | Q8D8Y2 | DE | Na <sup>+</sup> /H <sup>+</sup> antiporter nhaA 1;                                                                 |
| P | Q8D8Y2 | DE | Sodium/proton antiporter nhaA 1;                                                                                   |
| P | Q8D928 | CC | Part of the ABC transporter complex BtuCDF involved in vitamin B12 import                                          |
| P | Q8D928 | DE | Vitamin B12 import ATP-binding protein BtuD;                                                                       |
| P | Q8D928 | DE | Vitamin B12-transporting ATPase;                                                                                   |
| P | Q8D9J4 | CC | Part of the ABC transporter complex PotABCD involved in spermidine/putrescine import                               |
| P | Q8D9J4 | CC | Part of the ABC transporter complex PotABCD involved in spermidine/putrescine import                               |
| P | Q8D9J4 | DE | Spermidine/putrescine import ATP-binding protein PotA;                                                             |
| P | Q8D9J4 | DE | Spermidine/putrescine import ATP-binding protein PotA;                                                             |
| P | Q8DAG9 | CC | Na <sup>+</sup> /H <sup>+</sup> antiporter that extrudes sodium in exchange for external protons (By similarity)   |
| P | Q8DAG9 | DE | Na <sup>+</sup> /H <sup>+</sup> antiporter nhaB;                                                                   |
| P | Q8DAG9 | DE | Sodium/proton antiporter nhaB;                                                                                     |
| P | Q8DAG9 | DR | sodium:hydrogen antiporter activity                                                                                |
| P | Q8DB17 | CC | Channel that permits osmotically driven movement of water in both directions                                       |
| P | Q8DB17 | CC | It mediates rapid entry or exit of water in response to abrupt changes in osmolarity (By similarity).              |
| P | Q8DFC3 | CC | Part of the ABC transporter complex MetNIQ involved in methionine import                                           |
| P | Q8DFC3 | DE | Methionine import ATP-binding protein MetN;                                                                        |
| P | Q8DFC3 | DR | D-methionine transmembrane transporter activity                                                                    |
| P | Q8DFQ4 | CC | Part of the ABC transporter complex ZnuABC involved in zinc import                                                 |
| P | Q8DFQ4 | DE | Zinc import ATP-binding protein ZnuC;                                                                              |
| P | Q8DFQ4 | DR | zinc transporting ATPase activity                                                                                  |
| P | Q8DGZ3 | CC | Part of the ABC transporter complex PstSACB involved in phosphate import                                           |
| P | Q8DGZ3 | DE | ABC phosphate transporter;                                                                                         |
| P | Q8DGZ3 | DE | Phosphate import ATP-binding protein PstB;                                                                         |
| P | Q8DGZ3 | DE | Phosphate-transporting ATPase;                                                                                     |
| P | Q8DGZ3 | DR | inorganic phosphate transmembrane transporter activity                                                             |
| P | Q8DGZ3 | DR | phosphate transmembrane-transporting ATPase activity                                                               |
| P | Q8DHB0 | CC | Transport of potassium into the cell (By similarity).                                                              |
| P | Q8DHB0 | DE | Probable potassium transport system protein kup;                                                                   |

|   |        |    |                                                                                                                                                                              |
|---|--------|----|------------------------------------------------------------------------------------------------------------------------------------------------------------------------------|
| P | Q8DHB0 | DR | potassium ion transmembrane transporter activity                                                                                                                             |
| P | Q8DLH9 | CC | Plays an important role in protecting the acceptor side of photosystem II (PSII) against oxidative damage, especially under iron-limiting growth conditions (By similarity). |
| P | Q8DLH9 | DE | Iron deficiency-induced protein A;                                                                                                                                           |
| P | Q8DS05 | DE | Putative PTS system, glucose-specific IIABC component;                                                                                                                       |
| P | Q8DU23 | CC | Part of the ABC transporter complex PstSACB involved in phosphate import                                                                                                     |
| P | Q8DU23 | DE | ABC phosphate transporter 2;                                                                                                                                                 |
| P | Q8DU23 | DE | Phosphate import ATP-binding protein PstB 2;                                                                                                                                 |
| P | Q8DU23 | DE | Phosphate-transporting ATPase 2;                                                                                                                                             |
| P | Q8DU23 | DR | inorganic phosphate transmembrane transporter activity                                                                                                                       |
| P | Q8DU23 | DR | phosphate transmembrane-transporting ATPase activity                                                                                                                         |
| P | Q8DU24 | CC | Part of the ABC transporter complex PstSACB involved in phosphate import                                                                                                     |
| P | Q8DU24 | DE | ABC phosphate transporter 1;                                                                                                                                                 |
| P | Q8DU24 | DE | Phosphate import ATP-binding protein PstB 1;                                                                                                                                 |
| P | Q8DU24 | DE | Phosphate-transporting ATPase 1;                                                                                                                                             |
| P | Q8DU24 | DR | inorganic phosphate transmembrane transporter activity                                                                                                                       |
| P | Q8DU24 | DR | phosphate transmembrane-transporting ATPase activity                                                                                                                         |
| P | Q8DUF7 | CC | Part of the ABC transporter complex PotABCD involved in spermidine/putrescine import                                                                                         |
| P | Q8DUF7 | CC | Part of the ABC transporter complex PotABCD involved in spermidine/putrescine import                                                                                         |
| P | Q8DUF7 | DE | Spermidine/putrescine import ATP-binding protein PotA;                                                                                                                       |
| P | Q8DUF7 | DE | Spermidine/putrescine import ATP-binding protein PotA;                                                                                                                       |
| P | Q8DY54 | CC | Part of the ABC transporter complex MetNIQ involved in methionine import                                                                                                     |
| P | Q8DY54 | DE | Methionine import ATP-binding protein MetN;                                                                                                                                  |
| P | Q8DY58 | CC | Involved in the import of serine and threonine into the cell, with the concomitant import of sodium (symport system) (By similarity).                                        |
| P | Q8DY58 | DE | Na <sup>+</sup> /serine-threonine symporter;                                                                                                                                 |
| P | Q8DY58 | DR | sodium:dicarboxylate symporter activity                                                                                                                                      |
| P | Q8DY58 | DR | sodium:dicarboxylate symporter activity                                                                                                                                      |
| P | Q8DZJ0 | CC | Part of the ABC transporter complex PotABCD involved in spermidine/putrescine import                                                                                         |
| P | Q8DZJ0 | CC | Part of the ABC transporter complex PotABCD involved in spermidine/putrescine import                                                                                         |
| P | Q8DZJ0 | DE | Spermidine/putrescine import ATP-binding protein PotA;                                                                                                                       |
| P | Q8DZJ0 | DE | Spermidine/putrescine import ATP-binding protein PotA;                                                                                                                       |
| P | Q8DZL1 | CC | Transport of potassium into the cell (By similarity).                                                                                                                        |
| P | Q8DZL1 | DE | Probable potassium transport system protein kup;                                                                                                                             |
| P | Q8DZL1 | DR | potassium ion transmembrane transporter activity                                                                                                                             |
| P | Q8DZV4 | CC | Part of the ABC transporter complex pstSACB involved in phosphate import (By similarity).                                                                                    |
| P | Q8DZV4 | DE | Phosphate-binding protein pstS 1;                                                                                                                                            |
| P | Q8E281 | CC | Part of the ABC transporter complex RbsABCD involved in ribose import                                                                                                        |
| P | Q8E281 | DE | Ribose import ATP-binding protein RbsA;                                                                                                                                      |
| P | Q8E310 | CC | Part of the ABC transporter complex pstSACB involved in phosphate import (By similarity).                                                                                    |
| P | Q8E310 | DE | Phosphate-binding protein pstS 2;                                                                                                                                            |
| P | Q8E3S0 | CC | Part of the ABC transporter complex MetNIQ involved in methionine import                                                                                                     |
| P | Q8E3S0 | DE | Methionine import ATP-binding protein MetN;                                                                                                                                  |
| P | Q8E3S4 | CC | Involved in the import of serine and threonine into the cell, with the concomitant import of sodium (symport system) (By similarity).                                        |
| P | Q8E3S4 | DE | Na <sup>+</sup> /serine-threonine symporter;                                                                                                                                 |
| P | Q8E3S4 | DR | sodium:dicarboxylate symporter activity                                                                                                                                      |
| P | Q8E3S4 | DR | sodium:dicarboxylate symporter activity                                                                                                                                      |
| P | Q8E554 | CC | Part of the ABC transporter complex PotABCD involved in spermidine/putrescine import                                                                                         |
| P | Q8E554 | CC | Part of the ABC transporter complex PotABCD involved in spermidine/putrescine import                                                                                         |
| P | Q8E554 | DE | Spermidine/putrescine import ATP-binding protein PotA;                                                                                                                       |
| P | Q8E554 | DE | Spermidine/putrescine import ATP-binding protein PotA;                                                                                                                       |
| P | Q8E575 | CC | Transport of potassium into the cell (By similarity).                                                                                                                        |
| P | Q8E575 | DE | Probable potassium transport system protein kup;                                                                                                                             |
| P | Q8E575 | DR | potassium ion transmembrane transporter activity                                                                                                                             |
| P | Q8E5K2 | CC | Part of the ABC transporter complex pstSACB involved in phosphate import (By similarity).                                                                                    |
| P | Q8E5K2 | DE | Phosphate-binding protein pstS 1;                                                                                                                                            |
| P | Q8E7N9 | CC | Part of the ABC transporter complex RbsABCD involved in ribose import                                                                                                        |
| P | Q8E7N9 | DE | Ribose import ATP-binding protein RbsA;                                                                                                                                      |
| P | Q8E8K8 | CC | Part of the ABC transporter complex CysA <sub>11</sub> involved in sulfate/thiosulfate import                                                                                |
| P | Q8E8K8 | DE | Sulfate-transporting ATPase 2;                                                                                                                                               |
| P | Q8E8K8 | DE | Sulfate/thiosulfate import ATP-binding protein CysA 2;                                                                                                                       |

|   |        |    |                                                                                                                                                                                         |
|---|--------|----|-----------------------------------------------------------------------------------------------------------------------------------------------------------------------------------------|
| P | Q8E8K8 | DR | sulfate transmembrane-transporting ATPase activity                                                                                                                                      |
| P | Q8E9I8 | CC | Part of the ABC transporter complex PstSACB involved in phosphate import                                                                                                                |
| P | Q8E9I8 | DE | ABC phosphate transporter 2;                                                                                                                                                            |
| P | Q8E9I8 | DE | Phosphate import ATP-binding protein PstB 2;                                                                                                                                            |
| P | Q8E9I8 | DE | Phosphate-transporting ATPase 2;                                                                                                                                                        |
| P | Q8E9I8 | DR | inorganic phosphate transmembrane transporter activity                                                                                                                                  |
| P | Q8E9I8 | DR | phosphate transmembrane-transporting ATPase activity                                                                                                                                    |
| P | Q8EAN3 | CC | Part of the ABC transporter complex ModABC involved in molybdenum import                                                                                                                |
| P | Q8EAN3 | DE | Molybdenum import ATP-binding protein ModC;                                                                                                                                             |
| P | Q8EAN3 | DR | molybdenum ion transmembrane transporter activity                                                                                                                                       |
| P | Q8EB59 | CC | Part of the ABC transporter complex HmuTUV involved in hemin import                                                                                                                     |
| P | Q8EB59 | DE | Hemin import ATP-binding protein HmuV;                                                                                                                                                  |
| P | Q8EBC3 | CC | Part of the ABC transporter complex CysAW 1F involved in sulfate/thiosulfate import                                                                                                     |
| P | Q8EBC3 | DE | Sulfate/thiosulfate import ATP-binding protein CysA 1;                                                                                                                                  |
| P | Q8ECL5 | CC | Involved in the import of serine and threonine into the cell, with the concomitant import of sodium (symport system) (By similarity).                                                   |
| P | Q8ECL5 | DE | Na <sup>+</sup> /serine-threonine symporter;                                                                                                                                            |
| P | Q8ECL5 | DR | sodium:dicarboxylate symporter activity                                                                                                                                                 |
| P | Q8ECL5 | DR | sodium:dicarboxylate symporter activity                                                                                                                                                 |
| P | Q8ED79 | CC | Na <sup>+</sup> /H <sup>+</sup> antiporter that extrudes sodium in exchange for external protons (By similarity)                                                                        |
| P | Q8ED79 | DE | Na <sup>+</sup> /H <sup>+</sup> antiporter nhaB;                                                                                                                                        |
| P | Q8ED79 | DE | Sodium/proton antiporter nhaB;                                                                                                                                                          |
| P | Q8ED79 | DR | sodium:hydrogen antiporter activity                                                                                                                                                     |
| P | Q8EEV5 | DE | Lipoprotein-releasing system ATP-binding protein LolD;                                                                                                                                  |
| P | Q8EEV5 | DR | lipoprotein transporter activity                                                                                                                                                        |
| P | Q8EG82 | CC | Part of the ABC transporter complex PstSACB involved in phosphate import                                                                                                                |
| P | Q8EG82 | DE | ABC phosphate transporter 1;                                                                                                                                                            |
| P | Q8EG82 | DE | Phosphate import ATP-binding protein PstB 1;                                                                                                                                            |
| P | Q8EG82 | DE | Phosphate-transporting ATPase 1;                                                                                                                                                        |
| P | Q8EG82 | DR | inorganic phosphate transmembrane transporter activity                                                                                                                                  |
| P | Q8EG82 | DR | phosphate transmembrane-transporting ATPase activity                                                                                                                                    |
| P | Q8EH93 | CC | Na <sup>+</sup> /H <sup>+</sup> antiporter that extrudes sodium in exchange for external protons (By similarity)                                                                        |
| P | Q8EH93 | DE | Na <sup>+</sup> /H <sup>+</sup> antiporter nhaA;                                                                                                                                        |
| P | Q8EH93 | DE | Sodium/proton antiporter nhaA;                                                                                                                                                          |
| P | Q8EHC1 | CC | Channel that permits osmotically driven movement of water in both directions                                                                                                            |
| P | Q8EHC1 | CC | It mediates rapid entry or exit of water in response to abrupt changes in osmolarity (By similarity).                                                                                   |
| P | Q8EK40 | CC | Part of the ABC transporter complex CcmAB involved in the biogenesis of c-type cytochromes; once thought to export heme, this seems not to be the case, but its exact role is uncertain |
| P | Q8EK40 | DE | Heme exporter protein A;                                                                                                                                                                |
| P | Q8EK40 | DR | heme-transporting ATPase activity                                                                                                                                                       |
| P | Q8ELA5 | CC | Part of the ABC transporter complex MetNIQ involved in methionine import                                                                                                                |
| P | Q8ELA5 | DE | Methionine import ATP-binding protein MetN 4;                                                                                                                                           |
| P | Q8ELQ6 | CC | Part of the ABC transporter complex MetNIQ involved in methionine import                                                                                                                |
| P | Q8ELQ6 | DE | Methionine import ATP-binding protein MetN 3;                                                                                                                                           |
| P | Q8ELR4 | CC | Part of the ABC transporter complex PotABCD involved in spermidine/putrescine import                                                                                                    |
| P | Q8ELR4 | CC | Part of the ABC transporter complex PotABCD involved in spermidine/putrescine import                                                                                                    |
| P | Q8ELR4 | DE | Spermidine/putrescine import ATP-binding protein PotA;                                                                                                                                  |
| P | Q8ELR4 | DE | Spermidine/putrescine import ATP-binding protein PotA;                                                                                                                                  |
| P | Q8ELT4 | CC | Part of the ABC transporter complex PstSACB involved in phosphate import                                                                                                                |
| P | Q8ELT4 | DE | ABC phosphate transporter;                                                                                                                                                              |
| P | Q8ELT4 | DE | Phosphate import ATP-binding protein PstB;                                                                                                                                              |
| P | Q8ELT4 | DE | Phosphate-transporting ATPase;                                                                                                                                                          |
| P | Q8ELT4 | DR | inorganic phosphate transmembrane transporter activity                                                                                                                                  |
| P | Q8ELT4 | DR | phosphate transmembrane-transporting ATPase activity                                                                                                                                    |
| P | Q8ENB3 | CC | Part of the ABC transporter complex RbsABCD involved in ribose import                                                                                                                   |
| P | Q8ENB3 | DE | Ribose import ATP-binding protein RbsA;                                                                                                                                                 |
| P | Q8ENU2 | CC | Part of the ABC transporter complex MetNIQ involved in methionine import                                                                                                                |
| P | Q8ENU2 | DE | Methionine import ATP-binding protein MetN 2;                                                                                                                                           |
| P | Q8EPK1 | CC | Part of the ABC transporter complex MetNIQ involved in methionine import                                                                                                                |
| P | Q8EPK1 | DE | Methionine import ATP-binding protein MetN 1;                                                                                                                                           |
| P | Q8EUJ1 | CC | Part of the ABC transporter complex PstSACB involved in phosphate import                                                                                                                |
| P | Q8EUJ1 | DE | ABC phosphate transporter;                                                                                                                                                              |
| P | Q8EUJ1 | DE | Phosphate import ATP-binding protein PstB;                                                                                                                                              |

|   |        |    |                                                                                                                                                                                                            |
|---|--------|----|------------------------------------------------------------------------------------------------------------------------------------------------------------------------------------------------------------|
| P | Q8EUJ1 | DE | Phosphate-transporting ATPase;                                                                                                                                                                             |
| P | Q8EUJ1 | DR | inorganic phosphate transmembrane transporter activity                                                                                                                                                     |
| P | Q8EUJ1 | DR | phosphate transmembrane-transporting ATPase activity                                                                                                                                                       |
| P | Q8EUR3 | CC | Part of the ABC transporter complex PotABCD involved in                                                                                                                                                    |
| P | Q8EUR3 | CC | part of the ABC transporter complex PotABCD involved in                                                                                                                                                    |
| P | Q8EUR3 | DE | spermidine/putrescine import                                                                                                                                                                               |
| P | Q8EUR3 | DE | Spermidine/putrescine import ATP-binding protein PotA;                                                                                                                                                     |
| P | Q8EUR3 | DE | Spermidine/putrescine import ATP-binding protein PotA;                                                                                                                                                     |
| P | Q8F1M1 | CC | One of the components of the high-affinity ATP-driven potassium transport (or KDP) system, which catalyzes the hydrolysis of ATP coupled with the exchange of hydrogen and potassium ions (By similarity). |
| P | Q8F1M1 | DE | Potassium-binding and translocating subunit A;                                                                                                                                                             |
| P | Q8F1M1 | DE | Potassium-translocating ATPase A chain;                                                                                                                                                                    |
| P | Q8F1M1 | DE | Potassium-transporting ATPase A chain;                                                                                                                                                                     |
| P | Q8F1M1 | DR | potassium-transporting ATPase activity                                                                                                                                                                     |
| P | Q8F1M2 | CC | One of the components of the high-affinity ATP-driven potassium transport (or KDP) system, which catalyzes the hydrolysis of ATP coupled with the exchange of hydrogen and potassium ions                  |
| P | Q8F1M2 | DE | Potassium-binding and translocating subunit C;                                                                                                                                                             |
| P | Q8F1M2 | DE | Potassium-translocating ATPase C chain;                                                                                                                                                                    |
| P | Q8F1M2 | DE | Potassium-transporting ATPase C chain;                                                                                                                                                                     |
| P | Q8F1M2 | DR | potassium-transporting ATPase activity                                                                                                                                                                     |
| P | Q8F6L8 | DE | Lipoprotein-releasing system ATP-binding protein LolD;                                                                                                                                                     |
| P | Q8F6L8 | DR | lipoprotein transporter activity                                                                                                                                                                           |
| P | Q8F6Z1 | CC | Part of the ABC transporter complex CysAW 1P involved in sulfate/thiosulfate                                                                                                                               |
| P | Q8F6Z1 | DE | Sulfate-transporting ATPase;                                                                                                                                                                               |
| P | Q8F6Z1 | DE | Sulfate/thiosulfate import ATP-binding protein CysA;                                                                                                                                                       |
| P | Q8F6Z1 | DR | sulfate transmembrane-transporting ATPase activity                                                                                                                                                         |
| P | Q8FMN9 | CC | Part of the ABC transporter complex PstSACB involved in phosphate import                                                                                                                                   |
| P | Q8FMN9 | DE | ABC phosphate transporter;                                                                                                                                                                                 |
| P | Q8FMN9 | DE | Phosphate import ATP-binding protein PstB;                                                                                                                                                                 |
| P | Q8FMN9 | DE | Phosphate-transporting ATPase;                                                                                                                                                                             |
| P | Q8FMN9 | DR | inorganic phosphate transmembrane transporter activity                                                                                                                                                     |
| P | Q8FMN9 | DR | phosphate transmembrane-transporting ATPase activity                                                                                                                                                       |
| P | Q8FRX8 | CC | Part of the ABC transporter complex MetNIQ involved in methionine import                                                                                                                                   |
| P | Q8FRX8 | DE | Methionine import ATP-binding protein MetN;                                                                                                                                                                |
| P | Q8FUR8 | CC | Part of the ABC transporter complex XylFGH involved in xylose import                                                                                                                                       |
| P | Q8FUR8 | DE | Xylose import ATP-binding protein XylG;                                                                                                                                                                    |
| P | Q8FUU5 | CC | Part of the ABC transporter complex ZnuABC involved in zinc import                                                                                                                                         |
| P | Q8FUU5 | DE | Zinc import ATP-binding protein ZnuC;                                                                                                                                                                      |
| P | Q8FUU5 | DR | zinc transporting ATPase activity                                                                                                                                                                          |
| P | Q8FUU6 | CC | Involved in the high-affinity zinc uptake transport system                                                                                                                                                 |
| P | Q8FUU6 | DE | High-affinity zinc uptake system protein znuA;                                                                                                                                                             |
| P | Q8FVM9 | CC | Part of the ABC transporter complex NikABCDE involved in nickel import                                                                                                                                     |
| P | Q8FVM9 | DE | Nickel import ATP-binding protein NikD;                                                                                                                                                                    |
| P | Q8FVM9 | DR | nickel-transporting ATPase activity                                                                                                                                                                        |
| P | Q8FVN0 | CC | Part of the ABC transporter complex NikABCDE involved in nickel import                                                                                                                                     |
| P | Q8FVN0 | DE | Nickel import ATP-binding protein NikE;                                                                                                                                                                    |
| P | Q8FVN0 | DR | nickel-transporting ATPase activity                                                                                                                                                                        |
| P | Q8FW07 | DR | glycerol-3-phosphate-transporting ATPase activity                                                                                                                                                          |
| P | Q8FXI7 | CC | Part of the ABC transporter complex ModABC involved in molybdenum import                                                                                                                                   |
| P | Q8FXI7 | DE | Molybdenum import ATP-binding protein ModC;                                                                                                                                                                |
| P | Q8FXI7 | DR | molybdenum ion transmembrane transporter activity                                                                                                                                                          |
| P | Q8FY85 | CC | Transport of water across the membrane                                                                                                                                                                     |
| P | Q8FYU9 | CC | Part of the ABC transporter complex ThiBPQ involved in thiamine import                                                                                                                                     |
| P | Q8FYU9 | DE | Thiamine import ATP-binding protein ThiQ;                                                                                                                                                                  |
| P | Q8FYV0 | CC | Part of the ABC transporter complex thiBPQ involved in thiamine import                                                                                                                                     |
| P | Q8FYV0 | DE | Thiamine transport system permease protein thiP;                                                                                                                                                           |
| P | Q8FYV1 | CC | Part of the ABC transporter complex thiBPQ involved in thiamine import (By                                                                                                                                 |
| P | Q8FYV1 | DE | similarity)                                                                                                                                                                                                |
| P | Q8FYV1 | DE | Thiamine-binding periplasmic protein;                                                                                                                                                                      |
| P | Q8FZT8 | CC | Transport of potassium into the cell (By similarity).                                                                                                                                                      |
| P | Q8FZT8 | DE | Probable potassium transport system protein kup;                                                                                                                                                           |
| P | Q8FZT8 | DR | potassium ion transmembrane transporter activity                                                                                                                                                           |
| P | Q8G2C7 | CC | Na <sup>+</sup> /H <sup>+</sup> antiporter that extrudes sodium in exchange for external protons (By                                                                                                       |
| P | Q8G2C7 | DE | similarity)                                                                                                                                                                                                |
| P | Q8G2C7 | DE | Na <sup>+</sup> /H <sup>+</sup> antiporter nhaA;                                                                                                                                                           |
| P | Q8G2C7 | DE | Sodium/proton antiporter nhaA;                                                                                                                                                                             |

|   |        |    |                                                                                                                                                                                         |
|---|--------|----|-----------------------------------------------------------------------------------------------------------------------------------------------------------------------------------------|
| P | Q8G358 | CC | Part of the ABC transporter complex CcmAB involved in the biogenesis of c-type cytochromes; once thought to export heme, this seems not to be the case, but its exact role is uncertain |
| P | Q8G358 | DE | Heme exporter protein A;                                                                                                                                                                |
| P | Q8G358 | DR | heme-transporting ATPase activity                                                                                                                                                       |
| P | Q8G5P8 | CC | Part of the ABC transporter complex MetNIQ involved in methionine import                                                                                                                |
| P | Q8G5P8 | DE | Methionine import ATP-binding protein MetN;                                                                                                                                             |
| P | Q8G5R2 | CC | Na <sup>+</sup> /H <sup>+</sup> antiporter that extrudes sodium in exchange for external protons (By similarity)                                                                        |
| P | Q8G5R2 | DE | Na <sup>+</sup> /H <sup>+</sup> antiporter nhaA;                                                                                                                                        |
| P | Q8G5R2 | DE | Sodium/proton antiporter nhaA;                                                                                                                                                          |
| P | Q8G6U3 | CC | Transport of potassium into the cell (By similarity).                                                                                                                                   |
| P | Q8G6U3 | DE | Probable potassium transport system protein kup 1;                                                                                                                                      |
| P | Q8G6U3 | DR | potassium ion transmembrane transporter activity                                                                                                                                        |
| P | Q8G7F4 | CC | Part of the ABC transporter complex PstSACB involved in phosphate import                                                                                                                |
| P | Q8G7F4 | DE | ABC phosphate transporter;                                                                                                                                                              |
| P | Q8G7F4 | DE | Phosphate import ATP-binding protein PstB;                                                                                                                                              |
| P | Q8G7F4 | DE | Phosphate-transporting ATPase;                                                                                                                                                          |
| P | Q8G7F4 | DR | inorganic phosphate transmembrane transporter activity                                                                                                                                  |
| P | Q8G7F4 | DR | phosphate transmembrane-transporting ATPase activity                                                                                                                                    |
| P | Q8G7Q3 | CC | Transport of potassium into the cell (By similarity).                                                                                                                                   |
| P | Q8G7Q3 | DE | Probable potassium transport system protein kup 2;                                                                                                                                      |
| P | Q8G7Q3 | DR | potassium ion transmembrane transporter activity                                                                                                                                        |
| P | Q8GH68 | CC | H <sup>+</sup> -stimulated, highly selective, manganese uptake system (By similarity).                                                                                                  |
| P | Q8GH68 | DE | Probable manganese transport protein mntH;                                                                                                                                              |
| P | Q8GRT8 | CC | May play a role in root water uptake.                                                                                                                                                   |
| P | Q8GRT8 | CC | Water channel required to facilitate the transport of water across cell membrane                                                                                                        |
| P | Q8GSD9 | CC | Acts as a H <sup>+</sup> :phosphate symporter.                                                                                                                                          |
| P | Q8GSD9 | CC | Low-affinity transporter for inorganic phosphate (Pi)                                                                                                                                   |
| P | Q8GSD9 | DE | Inorganic phosphate transporter 1-2;                                                                                                                                                    |
| P | Q8GSD9 | DR | inorganic phosphate transmembrane transporter activity                                                                                                                                  |
| P | Q8GW61 | DE | Hexose transporter 14;                                                                                                                                                                  |
| P | Q8GX93 | CC | Voltage-gated chloride channel.                                                                                                                                                         |
| P | Q8GX93 | DE | Chloride channel protein CLC-e;                                                                                                                                                         |
| P | Q8GX93 | DR | voltage-gated chloride channel activity                                                                                                                                                 |
| P | Q8GXE6 | CC | Highly selective inward-rectifying potassium channel that could mediate potassium uptake in the pollen membrane                                                                         |
| P | Q8GXE6 | DE | Potassium channel AKT6;                                                                                                                                                                 |
| P | Q8GXE6 | DE | Potassium channel SPIK;                                                                                                                                                                 |
| P | Q8GXE6 | DE | Shaker pollen inward rectifier K <sup>+</sup> channel;                                                                                                                                  |
| P | Q8GXE6 | DR | voltage-gated potassium channel activity                                                                                                                                                |
| P | Q8GYF4 | CC | High-affinity transporter for external inorganic phosphate (By similarity).                                                                                                             |
| P | Q8GYF4 | DE | Probable inorganic phosphate transporter 1-5;                                                                                                                                           |
| P | Q8GYF4 | DR | inorganic phosphate transmembrane transporter activity                                                                                                                                  |
| P | Q8GYH8 | CC | H <sup>+</sup> /sulfate cotransporter that may play a role in the regulation of sulfate assimilation (By similarity).                                                                   |
| P | Q8GYH8 | DE | Probable sulfate transporter 4.2;                                                                                                                                                       |
| P | Q8GYH8 | DR | secondary active sulfate transmembrane transporter activity                                                                                                                             |
| P | Q8H074 | CC | High-affinity transporter for external inorganic phosphate (By similarity).                                                                                                             |
| P | Q8H074 | DE | Probable inorganic phosphate transporter 1-12;                                                                                                                                          |
| P | Q8H074 | DR | inorganic phosphate transmembrane transporter activity                                                                                                                                  |
| P | Q8H1G7 | CC | Magnesium transporter that may mediate the influx of magnesium (By similarity)                                                                                                          |
| P | Q8H1G7 | DE | Magnesium Transporter 8;                                                                                                                                                                |
| P | Q8H1G7 | DE | Magnesium transporter MRS2-8;                                                                                                                                                           |
| P | Q8H3P9 | CC | High-affinity potassium transporter.                                                                                                                                                    |
| P | Q8H3P9 | DE | Potassium transporter 7;                                                                                                                                                                |
| P | Q8H3P9 | DR | potassium ion transmembrane transporter activity                                                                                                                                        |
| P | Q8H5N9 | CC | Aquaporins facilitate the transport of water and small neutral solutes across cell membranes (By similarity).                                                                           |
| P | Q8H6G7 | CC | High-affinity transporter for external inorganic phosphate (By similarity).                                                                                                             |
| P | Q8H6G7 | DE | Probable inorganic phosphate transporter 1-9;                                                                                                                                           |
| P | Q8H6G8 | CC | High-affinity transporter for external inorganic phosphate (By similarity).                                                                                                             |
| P | Q8H6G8 | DE | Probable inorganic phosphate transporter 1-8;                                                                                                                                           |
| P | Q8H6G8 | DR | inorganic phosphate transmembrane transporter activity                                                                                                                                  |
| P | Q8H6G9 | CC | High-affinity transporter for external inorganic phosphate (By similarity).                                                                                                             |
| P | Q8H6G9 | DE | Probable inorganic phosphate transporter 1-7;                                                                                                                                           |



|   |        |    |                                                                                                                                                                                                   |
|---|--------|----|---------------------------------------------------------------------------------------------------------------------------------------------------------------------------------------------------|
| P | Q8H6G9 | DR | inorganic phosphate transmembrane transporter activity                                                                                                                                            |
| P | Q8H6H0 | CC | High-affinity transporter for external inorganic phosphate (Pi)                                                                                                                                   |
| P | Q8H6H0 | DE | Inorganic phosphate transporter 1-6;                                                                                                                                                              |
| P | Q8H6H0 | DR | inorganic phosphate transmembrane transporter activity                                                                                                                                            |
| P | Q8H6H2 | CC | High-affinity transporter for external inorganic phosphate (By similarity).                                                                                                                       |
| P | Q8H6H2 | DE | Probable inorganic phosphate transporter 1-4;                                                                                                                                                     |
| P | Q8H6H2 | DR | inorganic phosphate transmembrane transporter activity                                                                                                                                            |
| P | Q8H6H4 | CC | High-affinity transporter for external inorganic phosphate (By similarity)                                                                                                                        |
| P | Q8H6H4 | CC | Required for phosphate acquisition in plant.                                                                                                                                                      |
| P | Q8H6H4 | DE | Inorganic phosphate transporter 1-1;                                                                                                                                                              |
| P | Q8H6H4 | DR | inorganic phosphate transmembrane transporter activity                                                                                                                                            |
| P | Q8I0L6 | CC | May be a carbon dioxide/bicarbonate transporter (By similarity).                                                                                                                                  |
| P | Q8IRI6 | CC | Facilitative glucose transporter.                                                                                                                                                                 |
| P | Q8IRI6 | DE | Glucose transporter type 1;                                                                                                                                                                       |
| P | Q8IVB4 | CC | May act in electroneutral exchange of protons for Na <sup>+</sup> across membranes                                                                                                                |
| P | Q8IVB4 | DE | Na <sup>+</sup> /H <sup>+</sup> exchanger 9;                                                                                                                                                      |
| P | Q8IVB4 | DE | Sodium/hydrogen exchanger 9;                                                                                                                                                                      |
| P | Q8IVB4 | DR | sodium:hydrogen antiporter activity                                                                                                                                                               |
| P | Q8IVJ1 | CC | Acts as a magnesium transporter that is responsive to magnesium balance.                                                                                                                          |
| P | Q8IVJ1 | DR | magnesium ion transmembrane transporter activity                                                                                                                                                  |
| P | Q8IWA5 | CC | Putative choline transporter.                                                                                                                                                                     |
| P | Q8IWA5 | DE | Choline transporter-like protein 2;                                                                                                                                                               |
| P | Q8IWA5 | DR | choline transmembrane transporter activity                                                                                                                                                        |
| P | Q8IWU4 | CC | Facilitates the accumulation of zinc from the cytoplasm into intracellular vesicles, being a zinc-efflux transporter                                                                              |
| P | Q8IWU4 | CC | May be a major component for providing zinc to insulin maturation and/or storage processes in insulin-secreting pancreatic beta- cells.                                                           |
| P | Q8IWU4 | DE | Zinc transporter 8;                                                                                                                                                                               |
| P | Q8IWU4 | DR | zinc ion transmembrane transporter activity                                                                                                                                                       |
| P | Q8IY34 | CC | Transports free histidine and certain di- and tripeptides (By similarity).                                                                                                                        |
| P | Q8IY34 | DE | Peptide transporter 3;                                                                                                                                                                            |
| P | Q8IY34 | DE | Peptide/histidine transporter 2;                                                                                                                                                                  |
| P | Q8IY34 | DE | Peptide/histidine transporter 2;                                                                                                                                                                  |
| P | Q8IY34 | DR | peptide:hydrogen symporter activity                                                                                                                                                               |
| P | Q8JZN3 | CC | Inward rectifier potassium channels are characterized by a greater tendency to allow potassium to flow into the cell rather than out of it                                                        |
| P | Q8JZN3 | CC | Their voltage dependence is regulated by the concentration of extracellular potassium; as external potassium is raised, the voltage range of the channel opening shifts to more positive voltages |
| P | Q8JZN3 | DE | ATP-sensitive inward rectifier potassium channel 14;                                                                                                                                              |
| P | Q8JZN3 | DE | Inward rectifier K <sup>+</sup> channel Kir2.4;                                                                                                                                                   |
| P | Q8JZN3 | DE | Potassium channel, inwardly rectifying subfamily J member 14;                                                                                                                                     |
| P | Q8JZN3 | DR | inward rectifier potassium channel activity                                                                                                                                                       |
| P | Q8JZR4 | CC | Transports L-glutamate; the L-glutamate uptake is sodium- and voltage-dependent and chloride-independent                                                                                          |
| P | Q8JZR4 | CC | Transports L-glutamate; the L-glutamate uptake is sodium- and voltage-dependent and chloride-independent                                                                                          |
| P | Q8JZR4 | DR | sodium:dicarboxylate symporter activity                                                                                                                                                           |
| P | Q8JZR6 | CC | Mediates electroneutral sodium- and carbonate-dependent choride-HCO <sub>3</sub> (-) exchange with a Na <sup>+</sup> :HCO <sub>3</sub> (-) stoichiometry of 2:1                                   |
| P | Q8JZR6 | DE | Electroneutral Na <sup>+</sup> -driven Cl-HCO <sub>3</sub> exchanger;                                                                                                                             |
| P | Q8K0E3 | CC | Exhibits stereospecific cotransport of both D-glucose and D- xylose                                                                                                                               |
| P | Q8K0E3 | CC | Involved in the sodium-dependent cotransport of myo- inositol (MI) with a Na <sup>+</sup> :MI stoichiometry of 2:1                                                                                |
| P | Q8K0E3 | DE | Na <sup>+</sup> /myo-inositol cotransporter 2;                                                                                                                                                    |
| P | Q8K0E3 | DE | Sodium-dependent glucose cotransporter;                                                                                                                                                           |
| P | Q8K0E3 | DE | Sodium-dependent glucose cotransporter;                                                                                                                                                           |
| P | Q8K0E3 | DE | Sodium/glucose cotransporter KST1;                                                                                                                                                                |
| P | Q8K0E3 | DE | Sodium/glucose cotransporter KST1;                                                                                                                                                                |
| P | Q8K0E3 | DE | Sodium/myo-inositol cotransporter 2;                                                                                                                                                              |
| P | Q8K1C7 | CC | Proton-linked monocarboxylate transporter                                                                                                                                                         |
| P | Q8K1C7 | DE | Monocarboxylate transporter 14;                                                                                                                                                                   |
| P | Q8K211 | CC | High-affinity, saturable copper transporter involved in dietary copper uptake.                                                                                                                    |
| P | Q8K211 | DE | Copper transporter 1;                                                                                                                                                                             |
| P | Q8K211 | DE | High affinity copper uptake protein 1;                                                                                                                                                            |

|   |        |    |                                                                                                                                                                                                                                                                                                                                                                     |
|---|--------|----|---------------------------------------------------------------------------------------------------------------------------------------------------------------------------------------------------------------------------------------------------------------------------------------------------------------------------------------------------------------------|
| P | Q8K211 | DR | copper ion transmembrane transporter activity                                                                                                                                                                                                                                                                                                                       |
| P | Q8K3F6 | CC | Associates with KCNQ2 to form a potassium channel with essentially identical properties to the channel underlying the native M-current, a slowly activating and deactivating potassium conductance which plays a critical role in determining the subthreshold electrical excitability of neurons as well as the responsiveness to synaptic inputs (By similarity). |
| P | Q8K3F6 | DE | Potassium channel subunit alpha KvLQT3;                                                                                                                                                                                                                                                                                                                             |
| P | Q8K3F6 | DE | Potassium voltage-gated channel subfamily KQT member 3;                                                                                                                                                                                                                                                                                                             |
| P | Q8K3F6 | DE | Voltage-gated potassium channel subunit Kv7.3;                                                                                                                                                                                                                                                                                                                      |
| P | Q8K3F6 | DR | voltage-gated potassium channel activity                                                                                                                                                                                                                                                                                                                            |
| P | Q8K903 | CC | Low-affinity inorganic phosphate transport (By similarity).                                                                                                                                                                                                                                                                                                         |
| P | Q8K903 | DE | Low-affinity inorganic phosphate transporter;                                                                                                                                                                                                                                                                                                                       |
| P | Q8K903 | DR | inorganic phosphate transmembrane transporter activity                                                                                                                                                                                                                                                                                                              |
| P | Q8K911 | CC | This system is involved in mannitol transport (By similarity).                                                                                                                                                                                                                                                                                                      |
| P | Q8K911 | DE | Mannitol permease IIC component;                                                                                                                                                                                                                                                                                                                                    |
| P | Q8K911 | DE | Mannitol-specific phosphotransferase enzyme IIA component;                                                                                                                                                                                                                                                                                                          |
| P | Q8K911 | DE | Mannitol-specific phosphotransferase enzyme IIB component;                                                                                                                                                                                                                                                                                                          |
| P | Q8K911 | DE | PTS system mannitol-specific EIIB component;                                                                                                                                                                                                                                                                                                                        |
| P | Q8K911 | DE | PTS system mannitol-specific EIIC component;                                                                                                                                                                                                                                                                                                                        |
| P | Q8K911 | DE | PTS system mannitol-specific EIICBA component;                                                                                                                                                                                                                                                                                                                      |
| P | Q8K911 | DE | PTS system, mannitol-specific EIIA component;                                                                                                                                                                                                                                                                                                                       |
| P | Q8K9J0 | CC | This system is involved in glucose transport (By similarity).                                                                                                                                                                                                                                                                                                       |
| P | Q8K9J0 | DE | Glucose permease IIC component;                                                                                                                                                                                                                                                                                                                                     |
| P | Q8K9J0 | DE | Glucose-specific phosphotransferase enzyme IIB component;                                                                                                                                                                                                                                                                                                           |
| P | Q8K9J0 | DE | PTS system glucose-specific EIIB component;                                                                                                                                                                                                                                                                                                                         |
| P | Q8K9J0 | DE | PTS system glucose-specific EIIC component;                                                                                                                                                                                                                                                                                                                         |
| P | Q8K9J0 | DE | PTS system glucose-specific EIICB component;                                                                                                                                                                                                                                                                                                                        |
| P | Q8K9J0 | DR | glucose transmembrane transporter activity                                                                                                                                                                                                                                                                                                                          |
| P | Q8K9M5 | CC | Involved in the high-affinity zinc uptake transport system (By similarity).                                                                                                                                                                                                                                                                                         |
| P | Q8K9M5 | DE | High-affinity zinc uptake system protein znuA;                                                                                                                                                                                                                                                                                                                      |
| P | Q8K9M6 | CC | Part of the ABC transporter complex ZnuABC involved in zinc import                                                                                                                                                                                                                                                                                                  |
| P | Q8K9M6 | DE | Zinc import ATP-binding protein ZnuC;                                                                                                                                                                                                                                                                                                                               |
| P | Q8K9M6 | DR | zinc transporting ATPase activity                                                                                                                                                                                                                                                                                                                                   |
| P | Q8K9M7 | CC | Involved in the high-affinity zinc uptake transport system (By similarity).                                                                                                                                                                                                                                                                                         |
| P | Q8K9M7 | DE | High-affinity zinc uptake system membrane protein znuB;                                                                                                                                                                                                                                                                                                             |
| P | Q8K9M9 | CC | Glycerol enters the cell via the glycerol diffusion facilitator protein                                                                                                                                                                                                                                                                                             |
| P | Q8K9M9 | CC | This membrane protein facilitates the movement of glycerol across the cytoplasmic membrane (By similarity).                                                                                                                                                                                                                                                         |
| P | Q8K9M9 | DE | Glycerol uptake facilitator protein;                                                                                                                                                                                                                                                                                                                                |
| P | Q8KA51 | CC | This system is involved in glucose transport (By similarity).                                                                                                                                                                                                                                                                                                       |
| P | Q8KA51 | DE | Glucose-specific phosphotransferase enzyme IIA component;                                                                                                                                                                                                                                                                                                           |
| P | Q8KA51 | DE | PTS system glucose-specific EIIA component;                                                                                                                                                                                                                                                                                                                         |
| P | Q8KAT2 | CC | Transport of potassium into the cell (By similarity).                                                                                                                                                                                                                                                                                                               |
| P | Q8KAT2 | DE | Probable potassium transport system protein kup;                                                                                                                                                                                                                                                                                                                    |
| P | Q8KAT2 | DR | potassium ion transmembrane transporter activity                                                                                                                                                                                                                                                                                                                    |
| P | Q8KDZ5 | CC | Part of the ABC transporter complex PstSACB involved in phosphate import                                                                                                                                                                                                                                                                                            |
| P | Q8KDZ5 | DE | ABC phosphate transporter;                                                                                                                                                                                                                                                                                                                                          |
| P | Q8KDZ5 | DE | Phosphate import ATP-binding protein PstB;                                                                                                                                                                                                                                                                                                                          |
| P | Q8KDZ5 | DE | Phosphate-transporting ATPase;                                                                                                                                                                                                                                                                                                                                      |
| P | Q8KDZ5 | DR | inorganic phosphate transmembrane transporter activity                                                                                                                                                                                                                                                                                                              |
| P | Q8KDZ5 | DR | phosphate transmembrane-transporting ATPase activity                                                                                                                                                                                                                                                                                                                |
| P | Q8KU73 | CC | One of the components of the high-affinity ATP-driven potassium transport (or KDP) system, which catalyzes the hydrolysis of ATP coupled with the exchange of hydrogen and potassium ions (By similarity).                                                                                                                                                          |
| P | Q8KU73 | DE | Potassium-binding and translocating subunit B;                                                                                                                                                                                                                                                                                                                      |
| P | Q8KU73 | DE | Potassium-translocating ATPase B chain;                                                                                                                                                                                                                                                                                                                             |
| P | Q8KU73 | DE | Potassium-transporting ATPase B chain;                                                                                                                                                                                                                                                                                                                              |
| P | Q8KU73 | DR | potassium-transporting ATPase activity                                                                                                                                                                                                                                                                                                                              |
| P | Q8L4S2 | CC | magnesium transporter that may mediate the influx of magnesium (By similarity)                                                                                                                                                                                                                                                                                      |
| P | Q8L4S2 | DE | Magnesium transporter MRS2-F;                                                                                                                                                                                                                                                                                                                                       |
| P | Q8L6Z8 | DR | glucose transmembrane transporter activity                                                                                                                                                                                                                                                                                                                          |
| P | Q8L783 | CC | Translocates Ca2+ and other metal ions into vacuoles using the proton gradient formed by H+-ATPase and H+-pyrophosphatase (By similarity).                                                                                                                                                                                                                          |
| P | Q8L783 | DE | Ca2+/H+ antiporter CAX5;                                                                                                                                                                                                                                                                                                                                            |
| P | Q8L783 | DE | Ca2+/H+ exchanger 5;                                                                                                                                                                                                                                                                                                                                                |

|   |        |    |                                                                                                                                                                                                                                                                                                                                                                                                                                                                                                                                            |
|---|--------|----|--------------------------------------------------------------------------------------------------------------------------------------------------------------------------------------------------------------------------------------------------------------------------------------------------------------------------------------------------------------------------------------------------------------------------------------------------------------------------------------------------------------------------------------------|
| P | Q8L7R8 | DE | Hexose transporter 3;                                                                                                                                                                                                                                                                                                                                                                                                                                                                                                                      |
| P | Q8LAA6 | CC | Aquaporins facilitate the transport of water and small neutral solutes across cell membranes (By similarity).                                                                                                                                                                                                                                                                                                                                                                                                                              |
| P | Q8LAI1 | CC | Aquaporins facilitate the transport of water and small neutral solutes across cell membranes (By similarity).                                                                                                                                                                                                                                                                                                                                                                                                                              |
| P | Q8LBL1 | CC | Calcium-activated outward rectifying potassium channel                                                                                                                                                                                                                                                                                                                                                                                                                                                                                     |
| P | Q8LBL1 | DE | Calcium-activated outward-rectifying potassium channel 1;                                                                                                                                                                                                                                                                                                                                                                                                                                                                                  |
| P | Q8LBL1 | DR | potassium channel activity                                                                                                                                                                                                                                                                                                                                                                                                                                                                                                                 |
| P | Q8LE59 | CC | May play a role in the transport of iron in the plastids (By similarity).                                                                                                                                                                                                                                                                                                                                                                                                                                                                  |
| P | Q8LE59 | DE | Iron-regulated transporter 3;                                                                                                                                                                                                                                                                                                                                                                                                                                                                                                              |
| P | Q8LE59 | DR | iron ion transmembrane transporter activity                                                                                                                                                                                                                                                                                                                                                                                                                                                                                                |
| P | Q8LE59 | DR | zinc ion transmembrane transporter activity                                                                                                                                                                                                                                                                                                                                                                                                                                                                                                |
| P | Q8LFP7 | CC | Water channel probably required to promote glycerol permeability and water transport across cell membranes.                                                                                                                                                                                                                                                                                                                                                                                                                                |
| P | Q8LG88 | CC | Putative carrier protein indirectly involved in the uptake of malate and fumarate to the vacuole, probably by regulating the energization across the tonoplast                                                                                                                                                                                                                                                                                                                                                                             |
| P | Q8LG88 | CC | Uptake of malate to vacuoles is inhibited by citrate and by the uncoupler carbonyl- cyanide m-chlorophenylhydrazone, but seems to be not affected by sodium                                                                                                                                                                                                                                                                                                                                                                                |
| P | Q8LG88 | DE | Vacuolar malate transporter;                                                                                                                                                                                                                                                                                                                                                                                                                                                                                                               |
| P | Q8LG88 | DR | malate transmembrane transporter activity                                                                                                                                                                                                                                                                                                                                                                                                                                                                                                  |
| P | Q8LPL8 | CC | Probable potassium transporter.                                                                                                                                                                                                                                                                                                                                                                                                                                                                                                            |
| P | Q8LPL8 | DE | Potassium transporter 13;                                                                                                                                                                                                                                                                                                                                                                                                                                                                                                                  |
| P | Q8LPL8 | DR | potassium ion transmembrane transporter activity                                                                                                                                                                                                                                                                                                                                                                                                                                                                                           |
| P | Q8LPQ8 | DE | Sugar transporter MSSP2;                                                                                                                                                                                                                                                                                                                                                                                                                                                                                                                   |
| P | Q8N130 | CC | May be involved in actively transporting phosphate into cells via Na <sup>+</sup> cotransport in the renal brush border membrane                                                                                                                                                                                                                                                                                                                                                                                                           |
| P | Q8N130 | CC | May be involved in actively transporting phosphate into cells via Na <sup>+</sup> cotransport in the renal brush border membrane                                                                                                                                                                                                                                                                                                                                                                                                           |
| P | Q8N130 | DE | Na <sup>+</sup> -dependent phosphate cotransporter 2C;                                                                                                                                                                                                                                                                                                                                                                                                                                                                                     |
| P | Q8N130 | DE | Na <sup>+</sup> -dependent phosphate cotransporter 2C;                                                                                                                                                                                                                                                                                                                                                                                                                                                                                     |
| P | Q8N130 | DE | Na <sup>+</sup> /Pi cotransporter 2C;                                                                                                                                                                                                                                                                                                                                                                                                                                                                                                      |
| P | Q8N130 | DE | Sodium-dependent phosphate transport protein 2C;                                                                                                                                                                                                                                                                                                                                                                                                                                                                                           |
| P | Q8N130 | DE | Sodium-dependent phosphate transport protein 2C;                                                                                                                                                                                                                                                                                                                                                                                                                                                                                           |
| P | Q8N130 | DE | Sodium-phosphate transport protein 2C;                                                                                                                                                                                                                                                                                                                                                                                                                                                                                                     |
| P | Q8N130 | DE | Sodium/inorganic phosphate cotransporter IIC;                                                                                                                                                                                                                                                                                                                                                                                                                                                                                              |
| P | Q8N130 | DE | Sodium/inorganic phosphate cotransporter IIC;                                                                                                                                                                                                                                                                                                                                                                                                                                                                                              |
| P | Q8N130 | DE | Sodium/phosphate cotransporter 2C;                                                                                                                                                                                                                                                                                                                                                                                                                                                                                                         |
| P | Q8N130 | DE | Sodium/phosphate cotransporter 2C;                                                                                                                                                                                                                                                                                                                                                                                                                                                                                                         |
| P | Q8N130 | DR | sodium-dependent phosphate transmembrane transporter activity                                                                                                                                                                                                                                                                                                                                                                                                                                                                              |
| P | Q8N130 | DR | sodium-dependent phosphate transmembrane transporter activity                                                                                                                                                                                                                                                                                                                                                                                                                                                                              |
| P | Q8N130 | DR | sodium:phosphate symporter activity                                                                                                                                                                                                                                                                                                                                                                                                                                                                                                        |
| P | Q8N130 | DR | sodium:phosphate symporter activity                                                                                                                                                                                                                                                                                                                                                                                                                                                                                                        |
| P | Q8N1C3 | CC | GABA, the major inhibitory neurotransmitter in the vertebrate brain, mediates neuronal inhibition by binding to the GABA/benzodiazepine receptor and opening an integral chloride channel.                                                                                                                                                                                                                                                                                                                                                 |
| P | Q8N1C3 | DR | chloride channel activity                                                                                                                                                                                                                                                                                                                                                                                                                                                                                                                  |
| P | Q8N1S5 | DE | Zinc transporter ZIP11;                                                                                                                                                                                                                                                                                                                                                                                                                                                                                                                    |
| P | Q8N538 | DE | Potassium inwardly-rectifying channel, subfamily J, member 16;                                                                                                                                                                                                                                                                                                                                                                                                                                                                             |
| P | Q8N538 | DR | inward rectifier potassium channel activity                                                                                                                                                                                                                                                                                                                                                                                                                                                                                                |
| P | Q8N695 | CC | Acts as an electrogenic sodium (Na <sup>+</sup> ) and chloride (Cl <sup>-</sup> )-dependent sodium-coupled solute transporter, including transport of monocarboxylates (short-chain fatty acids including L-lactate, D-lactate, pyruvate, acetate, propionate, valerate and butyrate), lactate, monocarboxylate drugs (nicotinate, benzoate, salicylate and 5-aminosalicylate) and ketone bodies (beta-D- hydroxybutyrate, acetoacetate and alpha-ketoisocaproate), with a Na <sup>+</sup> :substrate stoichiometry of between 4:1 and 2:1 |
| P | Q8N695 | CC | Catalyzes passive carrier mediated diffusion of iodide                                                                                                                                                                                                                                                                                                                                                                                                                                                                                     |
| P | Q8N695 | CC | May play a critical role in the entry of L-lactate and ketone bodies into neurons by a process driven by an electrochemical Na <sup>+</sup> gradient and hence contribute to the maintenance of the energy status and function of neurons.                                                                                                                                                                                                                                                                                                 |
| P | Q8N695 | CC | Mediates iodide transport from the thyrocyte into the colloid lumen through the apical membrane                                                                                                                                                                                                                                                                                                                                                                                                                                            |
| P | Q8N695 | DE | Apical iodide transporter;                                                                                                                                                                                                                                                                                                                                                                                                                                                                                                                 |
| P | Q8N695 | DE | Electrogenic sodium monocarboxylate cotransporter;                                                                                                                                                                                                                                                                                                                                                                                                                                                                                         |
| P | Q8N695 | DE | Sodium-coupled monocarboxylate transporter 1;                                                                                                                                                                                                                                                                                                                                                                                                                                                                                              |
| P | Q8N697 | CC | Transports free histidine and certain di- and tripeptides.                                                                                                                                                                                                                                                                                                                                                                                                                                                                                 |

|   |        |    |                                                                                                                                                                                                           |
|---|--------|----|-----------------------------------------------------------------------------------------------------------------------------------------------------------------------------------------------------------|
| P | Q8N697 | DE | Peptide transporter 4;                                                                                                                                                                                    |
| P | Q8N697 | DE | Peptide/histidine transporter 1;                                                                                                                                                                          |
| P | Q8N697 | DE | Peptide/histidine transporter 1;                                                                                                                                                                          |
| P | Q8N697 | DR | peptide:hydrogen symporter activity                                                                                                                                                                       |
| P | Q8N8Q9 | CC | Acts as a selective Mg <sup>2+</sup> transporter (By similarity).                                                                                                                                         |
| P | Q8N8Q9 | DE | Magnesium transporter NIPA2;                                                                                                                                                                              |
| P | Q8N8R3 | DE | Mitochondrial carnitine/acylcarnitine carrier protein CACL;                                                                                                                                               |
| P | Q8NBS3 | CC | In the kidney, is essential for urinary concentration, mediates a sodium flux into the thin descending limb of Henle loop to allow countercurrent multiplication by osmotic equilibration (By similarity) |
| P | Q8NBS3 | CC | in the presence of borate functions as an electrogenic Na <sup>+</sup> coupled borate cotransporter                                                                                                       |
| P | Q8NBS3 | CC | Transporter which plays an important role in sodium- mediated fluid transport in different organs                                                                                                         |
| P | Q8NBS3 | DE | Bicarbonate transporter-related protein 1;                                                                                                                                                                |
| P | Q8NBS3 | DE | Sodium borate cotransporter 1;                                                                                                                                                                            |
| P | Q8NBS3 | DR | bicarbonate transmembrane transporter activity                                                                                                                                                            |
| P | Q8NBS3 | DR | sodium channel activity                                                                                                                                                                                   |
| P | Q8NCK7 | CC | Proton-linked monocarboxylate transporter                                                                                                                                                                 |
| P | Q8NCK7 | DE | Monocarboxylate transporter 11;                                                                                                                                                                           |
| P | Q8NCM2 | CC | Pore-forming (alpha) subunit of voltage-gated potassium channel                                                                                                                                           |
| P | Q8NCM2 | DE | Ether-a-go-go potassium channel 2;                                                                                                                                                                        |
| P | Q8NCM2 | DE | Potassium voltage-gated channel subfamily H member 5;                                                                                                                                                     |
| P | Q8NCM2 | DE | Voltage-gated potassium channel subunit Kv10.2;                                                                                                                                                           |
| P | Q8NCM2 | DR | voltage-gated potassium channel activity                                                                                                                                                                  |
| P | Q8NDX2 | CC | Mediates the uptake of glutamate into synaptic vesicles at presynaptic nerve terminals of excitatory neural cells                                                                                         |
| P | Q8NDX2 | DE | Vesicular glutamate transporter 3;                                                                                                                                                                        |
| P | Q8NDX2 | DR | L-glutamate transmembrane transporter activity                                                                                                                                                            |
| P | Q8NEW0 | CC | Partly regulates cellular zinc homeostasis                                                                                                                                                                |
| P | Q8NEW0 | CC | Required with ZNT5 for the activation of zinc- requiring enzymes, alkaline phosphatases (ALPs)                                                                                                            |
| P | Q8NEW0 | CC | Seems to facilitate zinc transport from the cytoplasm into the Golgi apparatus                                                                                                                            |
| P | Q8NEW0 | CC | Transports zinc into the lumens of the Golgi apparatus and the vesicular compartments where ALPs locate, thus, converting apoALPs to holoALPs                                                             |
| P | Q8NEW0 | DE | Zinc transporter 7;                                                                                                                                                                                       |
| P | Q8NFF2 | CC | Transports 1 Ca <sup>2+</sup> and 1 K <sup>+</sup> in exchange for 4 Na <sup>+</sup> .                                                                                                                    |
| P | Q8NFF2 | CC | Transports 1 Ca <sup>2+</sup> and 1 K <sup>+</sup> in exchange for 4 Na <sup>+</sup> .                                                                                                                    |
| P | Q8NFF2 | CC | Transports 1 Ca <sup>2+</sup> and 1 K <sup>+</sup> in exchange for 4 Na <sup>+</sup> .                                                                                                                    |
| P | Q8NFF2 | DE | Na <sup>+</sup> /K <sup>+</sup> /Ca <sup>2+</sup> -exchange protein 4;                                                                                                                                    |
| P | Q8NFF2 | DE | Na <sup>+</sup> /K <sup>+</sup> /Ca <sup>2+</sup> -exchange protein 4;                                                                                                                                    |
| P | Q8NFF2 | DE | Na <sup>+</sup> /K <sup>+</sup> /Ca <sup>2+</sup> -exchange protein 4;                                                                                                                                    |
| P | Q8NFF2 | DE | Sodium/potassium/calcium exchanger 4;                                                                                                                                                                     |
| P | Q8NFF2 | DE | Sodium/potassium/calcium exchanger 4;                                                                                                                                                                     |
| P | Q8NFF2 | DE | Sodium/potassium/calcium exchanger 4;                                                                                                                                                                     |
| P | Q8NFF2 | DR | calcium, potassium:sodium antiporter activity                                                                                                                                                             |
| P | Q8NFF2 | DR | calcium, potassium:sodium antiporter activity                                                                                                                                                             |
| P | Q8NFF2 | DR | calcium, potassium:sodium antiporter activity                                                                                                                                                             |
| P | Q8NMD6 | DE | ENZYME II SUCROSE PROTEIN;                                                                                                                                                                                |
| P | Q8NMK1 | CC | Part of the ABC transporter complex PstSACB involved in phosphate import                                                                                                                                  |
| P | Q8NMK1 | DE | ABC phosphate transporter;                                                                                                                                                                                |
| P | Q8NMK1 | DE | Phosphate import ATP-binding protein PstB;                                                                                                                                                                |
| P | Q8NMK1 | DE | Phosphate-transporting ATPase;                                                                                                                                                                            |
| P | Q8NMK1 | DR | inorganic phosphate transmembrane transporter activity                                                                                                                                                    |
| P | Q8NMK1 | DR | phosphate transmembrane-transporting ATPase activity                                                                                                                                                      |
| P | Q8NQH4 | DR | phosphonate transmembrane-transporting ATPase activity                                                                                                                                                    |
| P | Q8NR12 | CC | Part of the ABC transporter complex RbsABCD involved in ribose import                                                                                                                                     |
| P | Q8NR12 | DE | Ribose import ATP-binding protein RbsA;                                                                                                                                                                   |
| P | Q8NSG3 | CC | Transport of potassium into the cell (By similarity).                                                                                                                                                     |
| P | Q8NSG3 | DE | Probable potassium transport system protein kup;                                                                                                                                                          |
| P | Q8NSG3 | DR | potassium ion transmembrane transporter activity                                                                                                                                                          |
| P | Q8NSN2 | CC | Part of the ABC transporter complex MetNIQ involved in methionine import                                                                                                                                  |
| P | Q8NSN2 | DE | Methionine import ATP-binding protein MetN;                                                                                                                                                               |
| P | Q8PGE8 | CC | Part of the ABC transporter complex MetNIQ involved in methionine import                                                                                                                                  |
| P | Q8PGE8 | DE | Methionine import ATP-binding protein MetN;                                                                                                                                                               |
| P | Q8PHV1 | CC | Transport of potassium into the cell (By similarity).                                                                                                                                                     |

|   |        |    |                                                                                                                                                                                                                                                            |
|---|--------|----|------------------------------------------------------------------------------------------------------------------------------------------------------------------------------------------------------------------------------------------------------------|
| P | Q8PHV1 | DE | Probable potassium transport system protein kup;                                                                                                                                                                                                           |
| P | Q8PHV1 | DR | potassium ion transmembrane transporter activity                                                                                                                                                                                                           |
| P | Q8PK53 | CC | Part of the ABC transporter complex CcmAB involved in the biogenesis of c-type cytochromes; once thought to export heme, this seems not to be the case, but its exact role is uncertain                                                                    |
| P | Q8PK53 | DE | Heme exporter protein A;                                                                                                                                                                                                                                   |
| P | Q8PK53 | DR | heme-transporting ATPase activity                                                                                                                                                                                                                          |
| P | Q8PKT0 | DE | Lipoprotein-releasing system ATP-binding protein LolD;                                                                                                                                                                                                     |
| P | Q8PKT0 | DR | lipoprotein transporter activity                                                                                                                                                                                                                           |
| P | Q8PKX1 | CC | H <sup>+</sup> -stimulated, highly selective, manganese uptake system (By similarity).                                                                                                                                                                     |
| P | Q8PKX1 | DE | Probable manganese transport protein mntH;                                                                                                                                                                                                                 |
| P | Q8PM59 | CC | Part of the ABC transporter complex PstSACB involved in phosphate import                                                                                                                                                                                   |
| P | Q8PM59 | DE | ABC phosphate transporter;                                                                                                                                                                                                                                 |
| P | Q8PM59 | DE | Phosphate import ATP-binding protein PstB;                                                                                                                                                                                                                 |
| P | Q8PM59 | DE | Phosphate-transporting ATPase;                                                                                                                                                                                                                             |
| P | Q8PM59 | DR | inorganic phosphate transmembrane transporter activity                                                                                                                                                                                                     |
| P | Q8PM59 | DR | phosphate transmembrane-transporting ATPase activity                                                                                                                                                                                                       |
| P | Q8PNN4 | CC | Part of the ABC transporter complex CysAW involved in sulfate/thiosulfate import                                                                                                                                                                           |
| P | Q8PNN4 | DE | Sulfate-transporting ATPase;                                                                                                                                                                                                                               |
| P | Q8PNN4 | DE | Sulfate/thiosulfate import ATP-binding protein CysA;                                                                                                                                                                                                       |
| P | Q8PNN4 | DR | sulfate transmembrane-transporting ATPase activity                                                                                                                                                                                                         |
| P | Q8PPC8 | CC | One of the components of the high-affinity ATP-driven potassium transport (or KDP) system, which catalyzes the hydrolysis of ATP coupled with the exchange of hydrogen and potassium ions                                                                  |
| P | Q8PPC8 | DE | Potassium-binding and translocating subunit C;                                                                                                                                                                                                             |
| P | Q8PPC8 | DE | Potassium-translocating ATPase C chain;                                                                                                                                                                                                                    |
| P | Q8PPC8 | DE | Potassium-transporting ATPase C chain;                                                                                                                                                                                                                     |
| P | Q8PPC8 | DR | potassium-transporting ATPase activity                                                                                                                                                                                                                     |
| P | Q8PPC9 | CC | One of the components of the high-affinity ATP-driven potassium transport (or KDP) system, which catalyzes the hydrolysis of ATP coupled with the exchange of hydrogen and potassium ions (By similarity).                                                 |
| P | Q8PPC9 | DE | Potassium-binding and translocating subunit B;                                                                                                                                                                                                             |
| P | Q8PPC9 | DE | Potassium-translocating ATPase B chain;                                                                                                                                                                                                                    |
| P | Q8PPC9 | DE | Potassium-transporting ATPase B chain;                                                                                                                                                                                                                     |
| P | Q8PPC9 | DR | potassium-transporting ATPase activity                                                                                                                                                                                                                     |
| P | Q8PVF6 | CC | Part of the ABC transporter complex PstSACB involved in phosphate import                                                                                                                                                                                   |
| P | Q8PVF6 | DE | ABC phosphate transporter;                                                                                                                                                                                                                                 |
| P | Q8PVF6 | DE | Phosphate import ATP-binding protein PstB;                                                                                                                                                                                                                 |
| P | Q8PVF6 | DE | Phosphate-transporting ATPase;                                                                                                                                                                                                                             |
| P | Q8PVF6 | DR | inorganic phosphate transmembrane transporter activity                                                                                                                                                                                                     |
| P | Q8PVF6 | DR | phosphate transmembrane-transporting ATPase activity                                                                                                                                                                                                       |
| P | Q8Q040 | DE | Glycine betaine-binding protein;                                                                                                                                                                                                                           |
| P | Q8Q041 | DE | Glycine betaine transporter, ATP-binding protein;                                                                                                                                                                                                          |
| P | Q8Q042 | DE | Glycine betaine transport system, permease protein;                                                                                                                                                                                                        |
| P | Q8Q043 | DE | Glycine betaine transport system, permease protein;                                                                                                                                                                                                        |
| P | Q8QZW7 | CC | GABA, the major inhibitory neurotransmitter in the vertebrate brain, mediates neuronal inhibition by binding to the GABA/benzodiazepine receptor and opening an integral chloride channel                                                                  |
| P | Q8QZW7 | DR | chloride channel activity                                                                                                                                                                                                                                  |
| P | Q8R0Z5 | CC | Mitochondrial iron transporter that mediates iron uptake                                                                                                                                                                                                   |
| P | Q8R0Z5 | CC | The iron delivered into the mitochondria, presumably as Fe(2+), is then probably delivered to ferrochelatase to catalyze Fe(2+) incorporation into protoporphyrin IX to make heme (Probable).                                                              |
| P | Q8R0Z5 | DE | Mitochondrial iron transporter 2;                                                                                                                                                                                                                          |
| P | Q8R1C0 | CC | Assuming opened or closed conformations in response to the voltage difference across the membrane, the protein forms a potassium-selective channel through which potassium ions may pass in accordance with their electrochemical gradient (By similarity) |
| P | Q8R1C0 | CC | This protein mediates the voltage-dependent potassium ion permeability of excitable membranes                                                                                                                                                              |
| P | Q8R1C0 | DE | Potassium voltage-gated channel subfamily C member 4;                                                                                                                                                                                                      |
| P | Q8R1C0 | DE | Voltage-gated potassium channel subunit Kv3.4;                                                                                                                                                                                                             |
| P | Q8R1C0 | DR | voltage-gated potassium channel activity                                                                                                                                                                                                                   |
| P | Q8R1P5 | CC | Potassium channel displaying weak inward rectification in symmetrical K <sup>+</sup> solution (By similarity).                                                                                                                                             |
| P | Q8R1P5 | DE | Potassium channel subfamily K member 13;                                                                                                                                                                                                                   |

|   |        |    |                                                                                                                                                                                                            |
|---|--------|----|------------------------------------------------------------------------------------------------------------------------------------------------------------------------------------------------------------|
| P | Q8R1P5 | DE | Tandem pore domain halothane-inhibited potassium channel 1;                                                                                                                                                |
| P | Q8R1P5 | DR | potassium channel activity                                                                                                                                                                                 |
| P | Q8R1T4 | DE | UDP-N-acetylglucosamine transporter;                                                                                                                                                                       |
| P | Q8R2N1 | CC | It may play an important role in gastrointestinal tract water transport and in glycerol metabolism.                                                                                                        |
| P | Q8R2N1 | CC | Provides kidney medullary collecting duct with high permeability to water, thereby permitting water to move in the direction of an osmotic gradient                                                        |
| P | Q8R2N1 | CC | Water channel required to promote glycerol permeability and water transport across cell membranes                                                                                                          |
| P | Q8R2N1 | DR | water channel activity                                                                                                                                                                                     |
| P | Q8R2Z3 | CC | Acts as a sodium-independent DIDS-sensitive anion exchanger mediating bicarbonate, chloride, sulfate and oxalate transport                                                                                 |
| P | Q8R429 | CC | Contributes to calcium sequestration involved in muscular excitation/contraction (By similarity).                                                                                                          |
| P | Q8R429 | CC | This magnesium-dependent enzyme catalyzes the hydrolysis of ATP coupled with the translocation of calcium from the cytosol to the sarcoplasmic reticulum lumen                                             |
| P | Q8R429 | DE | Calcium pump 1;                                                                                                                                                                                            |
| P | Q8R429 | DE | Calcium-transporting ATPase sarcoplasmic reticulum type, fast twitch skeletal muscle isoform;                                                                                                              |
| P | Q8R429 | DE | Endoplasmic reticulum class 1/2 Ca <sup>2+</sup> ATPase;                                                                                                                                                   |
| P | Q8R429 | DE | SR Ca <sup>2+</sup> -ATPase 1;                                                                                                                                                                             |
| P | Q8R429 | DE | Sarcoplasmic/endoplasmic reticulum calcium ATPase 1;                                                                                                                                                       |
| P | Q8R429 | DR | calcium-transporting ATPase activity                                                                                                                                                                       |
| P | Q8R4D1 | CC | major proton extruding system driven by the inward sodium ion chemical gradient                                                                                                                            |
| P | Q8R4D1 | DE | Na <sup>+</sup> /H <sup>+</sup> exchanger 8;                                                                                                                                                               |
| P | Q8R4D1 | DE | Sodium/hydrogen exchanger 8;                                                                                                                                                                               |
| P | Q8R4D1 | DR | sodium:hydrogen antiporter activity                                                                                                                                                                        |
| P | Q8R4H8 | DE | Sodium/hydrogen exchanger;                                                                                                                                                                                 |
| P | Q8R4H8 | DR | sodium:hydrogen antiporter activity                                                                                                                                                                        |
| P | Q8R4H9 | CC | May be a transporter of zinc into beta cells in order to form insulin crystals                                                                                                                             |
| P | Q8R4H9 | CC | Partly regulates cellular zinc homeostasis                                                                                                                                                                 |
| P | Q8R4H9 | CC | Required with ZNT7 for the activation of zinc-requiring enzymes, alkaline phosphatases (ALPs)                                                                                                              |
| P | Q8R4H9 | CC | Transports zinc into the lumens of the Golgi apparatus and vesicular compartments where ALPs locate, thus, converting apoALPs to holoALPs                                                                  |
| P | Q8R4H9 | DE | Zinc transporter 5;                                                                                                                                                                                        |
| P | Q8R7S2 | CC | H <sup>+</sup> -stimulated, highly selective, manganese uptake system (By similarity).                                                                                                                     |
| P | Q8R7S2 | DE | Probable manganese transport protein mntH;                                                                                                                                                                 |
| P | Q8R8I5 | CC | One of the components of the high-affinity ATP-driven potassium transport (or KDP) system, which catalyzes the hydrolysis of ATP coupled with the exchange of hydrogen and potassium ions (By similarity). |
| P | Q8R8I5 | DE | Potassium-binding and translocating subunit A;                                                                                                                                                             |
| P | Q8R8I5 | DE | Potassium-translocating ATPase A chain;                                                                                                                                                                    |
| P | Q8R8I5 | DE | Potassium-transporting ATPase A chain;                                                                                                                                                                     |
| P | Q8R8I5 | DR | potassium-transporting ATPase activity                                                                                                                                                                     |
| P | Q8R8I6 | CC | One of the components of the high-affinity ATP-driven potassium transport (or KDP) system, which catalyzes the hydrolysis of ATP coupled with the exchange of hydrogen and potassium ions (By similarity). |
| P | Q8R8I6 | DE | Potassium-binding and translocating subunit B;                                                                                                                                                             |
| P | Q8R8I6 | DE | Potassium-translocating ATPase B chain;                                                                                                                                                                    |
| P | Q8R8I6 | DE | Potassium-transporting ATPase B chain;                                                                                                                                                                     |
| P | Q8R8I6 | DR | potassium-transporting ATPase activity                                                                                                                                                                     |
| P | Q8R8I7 | CC | One of the components of the high-affinity ATP-driven potassium transport (or KDP) system, which catalyzes the hydrolysis of ATP coupled with the exchange of hydrogen and potassium ions                  |
| P | Q8R8I7 | DE | Potassium-binding and translocating subunit C;                                                                                                                                                             |
| P | Q8R8I7 | DE | Potassium-translocating ATPase C chain;                                                                                                                                                                    |
| P | Q8R8I7 | DE | Potassium-transporting ATPase C chain;                                                                                                                                                                     |
| P | Q8R8I7 | DR | potassium-transporting ATPase activity                                                                                                                                                                     |
| P | Q8R9I2 | CC | Part of the ABC transporter complex PstSACB involved in phosphate import                                                                                                                                   |
| P | Q8R9I2 | DE | ABC phosphate transporter 2;                                                                                                                                                                               |
| P | Q8R9I2 | DE | Phosphate import ATP-binding protein PstB 2;                                                                                                                                                               |
| P | Q8R9I2 | DE | Phosphate-transporting ATPase 2;                                                                                                                                                                           |
| P | Q8R9I2 | DR | inorganic phosphate transmembrane transporter activity                                                                                                                                                     |
| P | Q8R9I2 | DR | phosphate transmembrane-transporting ATPase activity                                                                                                                                                       |

|   |        |    |                                                                                                                                                                       |
|---|--------|----|-----------------------------------------------------------------------------------------------------------------------------------------------------------------------|
| P | Q8RCU0 | CC | Part of the ABC transporter complex PstSACB involved in phosphate import                                                                                              |
| P | Q8RCU0 | DE | ABC phosphate transporter 1;                                                                                                                                          |
| P | Q8RCU0 | DE | Phosphate import ATP-binding protein PstB 1;                                                                                                                          |
| P | Q8RCU0 | DE | Phosphate-transporting ATPase 1;                                                                                                                                      |
| P | Q8RCU0 | DR | phosphate transmembrane-transporting ATPase activity                                                                                                                  |
| P | Q8RD43 | CC | Part of the ABC transporter complex RbsABCD involved in ribose import                                                                                                 |
| P | Q8RD43 | DE | Ribose import ATP-binding protein RbsA;                                                                                                                               |
| P | Q8REE1 | CC | Part of the ABC transporter complex MglABC involved in galactose/methyl galactoside import                                                                            |
| P | Q8REE1 | DE | Galactose/methyl galactoside import ATP-binding protein MglA;                                                                                                         |
| P | Q8REG7 | DR | phosphonate transmembrane-transporting ATPase activity                                                                                                                |
| P | Q8RFN2 | CC | Part of the ABC transporter complex MetNIQ involved in methionine import                                                                                              |
| P | Q8RFN2 | DE | Methionine import ATP-binding protein MetN;                                                                                                                           |
| P | Q8RFV0 | DE | Lipoprotein-releasing system ATP-binding protein LolD;                                                                                                                |
| P | Q8RFV0 | DR | lipoprotein transporter activity                                                                                                                                      |
| P | Q8RI39 | CC | Part of the ABC transporter complex PotABCD involved in spermidine/putrescine import                                                                                  |
| P | Q8RI39 | CC | Part of the ABC transporter complex PotABCD involved in spermidine/putrescine import                                                                                  |
| P | Q8RI39 | DE | Spermidine/putrescine import ATP-binding protein PotA;                                                                                                                |
| P | Q8RI39 | DE | Spermidine/putrescine import ATP-binding protein PotA;                                                                                                                |
| P | Q8RQL4 | CC | Part of the binding-protein-dependent transport system for glutamate; probably responsible for the translocation of the substrate across the membrane (By similarity) |
| P | Q8RQL4 | DE | Glutamate transport system permease protein gluD;                                                                                                                     |
| P | Q8RQL5 | CC | Part of the binding-protein-dependent transport system for glutamate; probably responsible for the translocation of the substrate across the membrane (By similarity) |
| P | Q8RQL5 | DE | Glutamate transport system permease protein gluC;                                                                                                                     |
| P | Q8RQL6 | CC | Part of the binding-protein-dependent transport system for glutamate (By similarity)                                                                                  |
| P | Q8RQL7 | CC | Part of the binding-protein-dependent transport system for glutamate                                                                                                  |
| P | Q8RQL7 | DE | Glutamate transport ATP-binding protein GluA;                                                                                                                         |
| P | Q8RQM4 | DE | Lysine exporter protein;                                                                                                                                              |
| P | Q8RWU6 | DE | Na <sup>+</sup> /H <sup>+</sup> exchanger 6;                                                                                                                          |
| P | Q8RWU6 | DE | Sodium/hydrogen exchanger 6;                                                                                                                                          |
| P | Q8RWU6 | DR | sodium:hydrogen antiporter activity                                                                                                                                   |
| P | Q8RXR2 | CC | Voltage-gated chloride channel.                                                                                                                                       |
| P | Q8RXR2 | DE | Chloride channel protein CLC-f;                                                                                                                                       |
| P | Q8RXR2 | DR | voltage-gated chloride channel activity                                                                                                                               |
| P | Q8RY46 | DE | Antigen peptide transporter-like 1;                                                                                                                                   |
| P | Q8S1N1 | CC | Magnesium transporter that may mediate the influx of magnesium (By similarity)                                                                                        |
| P | Q8S1N1 | DE | Magnesium transporter MRS2-E;                                                                                                                                         |
| P | Q8S396 | CC | Involved in vacuolar ion compartmentalization necessary for cell volume regulation and cytoplasmic Na <sup>+</sup> detoxification.                                    |
| P | Q8S396 | DE | Na <sup>+</sup> /H <sup>+</sup> exchanger 5;                                                                                                                          |
| P | Q8S396 | DE | Sodium/hydrogen exchanger 5;                                                                                                                                          |
| P | Q8S396 | DR | sodium:hydrogen antiporter activity                                                                                                                                   |
| P | Q8S397 | DE | Na <sup>+</sup> /H <sup>+</sup> exchanger 4;                                                                                                                          |
| P | Q8S397 | DE | Sodium/hydrogen exchanger 4;                                                                                                                                          |
| P | Q8S397 | DR | sodium:hydrogen antiporter activity                                                                                                                                   |
| P | Q8S3W4 | CC | Probably mediates zinc uptake from the rhizosphere (By similarity).                                                                                                   |
| P | Q8S3W4 | DE | Probable zinc transporter 8;                                                                                                                                          |
| P | Q8S3W4 | DR | zinc ion transmembrane transporter activity                                                                                                                           |
| P | Q8SRA2 | CC | ATP transporter involved in the uptake of ATP from the host cell cytoplasm                                                                                            |
| P | Q8SRA2 | CC | Provides the microsporidian cell with host ATP in exchange for ADP                                                                                                    |
| P | Q8SRA2 | CC | Provides the microsporidian cell with host ATP in exchange for ADP                                                                                                    |
| P | Q8SRA2 | DE | ADP,ATP carrier protein 1;                                                                                                                                            |
| P | Q8SRA2 | DE | ADP/ATP translocase 1;                                                                                                                                                |
| P | Q8SRA2 | DE | ADP/ATP translocase 1;                                                                                                                                                |
| P | Q8SRK2 | CC | Water channel required to facilitate the transport of water across membranes                                                                                          |
| P | Q8SUF9 | CC | ATP transporter involved in the uptake of ATP from the host cell cytoplasm                                                                                            |
| P | Q8SUF9 | CC | Provides the microsporidian cell with host ATP in exchange for ADP                                                                                                    |
| P | Q8SUF9 | CC | Provides the microsporidian cell with host ATP in exchange for ADP                                                                                                    |
| P | Q8SUF9 | DE | ADP,ATP carrier protein 2;                                                                                                                                            |
| P | Q8SUF9 | DE | ADP/ATP translocase 2;                                                                                                                                                |
| P | Q8SUF9 | DE | ADP/ATP translocase 2;                                                                                                                                                |
| P | Q8SUG0 | CC | ATP transporter involved in the uptake of ATP from the parasite cell cytoplasm into the mitosome matrix                                                               |
| P | Q8SUG0 | DE | ADP,ATP carrier protein 3;                                                                                                                                            |

|   |        |    |                                                                                                                                           |
|---|--------|----|-------------------------------------------------------------------------------------------------------------------------------------------|
| P | Q8SUG0 | DE | ADP/ATP translocase 3;                                                                                                                    |
| P | Q8SUG0 | DE | ADP/ATP translocase 3;                                                                                                                    |
| P | Q8SUG7 | CC | ATP transporter involved in the uptake of ATP from the host cell cytoplasm                                                                |
| P | Q8SUG7 | CC | Provides the microsporidian cell with host ATP in exchange for ADP                                                                        |
| P | Q8SUG7 | CC | Provides the microsporidian cell with host ATP in exchange for ADP                                                                        |
| P | Q8SUG7 | DE | ADP,ATP carrier protein 4;                                                                                                                |
| P | Q8SUG7 | DE | ADP/ATP translocase 4;                                                                                                                    |
| P | Q8SUG7 | DE | ADP/ATP translocase 4;                                                                                                                    |
| P | Q8TAD4 | CC | May be a transporter of zinc into beta cells in order to form insulin crystals                                                            |
| P | Q8TAD4 | CC | Partly regulates cellular zinc homeostasis                                                                                                |
| P | Q8TAD4 | CC | Required with ZNT7 for the activation of zinc-requiring enzymes, alkaline phosphatases (ALPs)                                             |
| P | Q8TAD4 | CC | Transports zinc into the lumens of the Golgi apparatus and vesicular compartments where ALPs locate, thus, converting apoALPs to holoALPs |
| P | Q8TAD4 | DE | Zinc transporter 5;                                                                                                                       |
| P | Q8TAD4 | DR | zinc ion transmembrane transporter activity                                                                                               |
| P | Q8TAE7 | CC | Potassium channel subunit                                                                                                                 |
| P | Q8TAE7 | DE | Potassium voltage-gated channel subfamily G member 3;                                                                                     |
| P | Q8TAE7 | DE | Voltage-gated potassium channel subunit Kv10.1;                                                                                           |
| P | Q8TAE7 | DE | Voltage-gated potassium channel subunit Kv6.3;                                                                                            |
| P | Q8TDB8 | CC | Facilitative glucose transporter (By similarity)                                                                                          |
| P | Q8TDB8 | DE | Glucose transporter type 14;                                                                                                              |
| P | Q8TDB8 | DE | Solute carrier family 2, facilitated glucose transporter member 14;                                                                       |
| P | Q8TDB8 | DR | glucose transmembrane transporter activity                                                                                                |
| P | Q8TDN1 | CC | Potassium channel subunit                                                                                                                 |
| P | Q8TDN1 | DE | Potassium voltage-gated channel subfamily G member 4;                                                                                     |
| P | Q8TDN1 | DE | Voltage-gated potassium channel subunit Kv6.4;                                                                                            |
| P | Q8TDN1 | DR | voltage-gated potassium channel activity                                                                                                  |
| P | Q8TDN2 | CC | Potassium channel subunit                                                                                                                 |
| P | Q8TDN2 | DE | Potassium voltage-gated channel subfamily V member 2;                                                                                     |
| P | Q8TDN2 | DE | Voltage-gated potassium channel subunit Kv8.2;                                                                                            |
| P | Q8TDN2 | DR | voltage-gated potassium channel activity                                                                                                  |
| P | Q8TE54 | CC | Acts as a sodium-independent DIDS-sensitive anion exchanger mediating bicarbonate, chloride, sulfate and oxalate transport                |
| P | Q8TE54 | DR | sulfate transmembrane transporter activity                                                                                                |
| P | Q8TF71 | DE | Monocarboxylate transporter 10;                                                                                                           |
| P | Q8TJZ4 | DE | Cadmium efflux ATPase;                                                                                                                    |
| P | Q8TL61 | CC | Transport of potassium into the cell (By similarity).                                                                                     |
| P | Q8TL61 | DE | Probable potassium transport system protein kup;                                                                                          |
| P | Q8TL61 | DR | potassium ion transmembrane transporter activity                                                                                          |
| P | Q8TSA8 | CC | Part of the ABC transporter complex PstSACB involved in phosphate import                                                                  |
| P | Q8TSA8 | DE | ABC phosphate transporter;                                                                                                                |
| P | Q8TSA8 | DE | Phosphate import ATP-binding protein PstB;                                                                                                |
| P | Q8TSA8 | DE | Phosphate-transporting ATPase;                                                                                                            |
| P | Q8TSA8 | DR | inorganic phosphate transmembrane transporter activity                                                                                    |
| P | Q8TSA8 | DR | phosphate transmembrane-transporting ATPase activity                                                                                      |
| P | Q8TUR7 | CC | Part of the ABC transporter complex PstSACB involved in phosphate import                                                                  |
| P | Q8TUR7 | DE | ABC phosphate transporter;                                                                                                                |
| P | Q8TUR7 | DE | Phosphate import ATP-binding protein PstB;                                                                                                |
| P | Q8TUR7 | DE | Phosphate-transporting ATPase;                                                                                                            |
| P | Q8TUR7 | DR | phosphate transmembrane-transporting ATPase activity                                                                                      |
| P | Q8U242 | CC | Part of the ABC transporter complex PstSACB involved in phosphate import                                                                  |
| P | Q8U242 | DE | ABC phosphate transporter;                                                                                                                |
| P | Q8U242 | DE | Phosphate import ATP-binding protein PstB;                                                                                                |
| P | Q8U242 | DE | Phosphate-transporting ATPase;                                                                                                            |
| P | Q8U242 | DR | inorganic phosphate transmembrane transporter activity                                                                                    |
| P | Q8U242 | DR | phosphate transmembrane-transporting ATPase activity                                                                                      |
| P | Q8U4K3 | CC | Part of the ABC transporter complex WtpABC involved in molybdate/tungstate import                                                         |
| P | Q8U4K3 | DE | Molybdate/tungstate import ATP-binding protein WtpC;                                                                                      |
| P | Q8U4K3 | DR | molybdate transmembrane-transporting ATPase activity                                                                                      |
| P | Q8U4K4 | CC | Part of the ABC transporter complex WtpABC involved in molybdate/tungstate import                                                         |
| P | Q8U4K4 | DE | Molybdate/tungstate transport system permease protein wtpB;                                                                               |
| P | Q8U4K5 | CC | Binds tungstate and molybdate, with a preference for tungstate.                                                                           |
| P | Q8U4K5 | CC | Part of the ABC transporter complex WtpABC involved in molybdate/tungstate import                                                         |
| P | Q8U4K5 | DE | Molybdate/tungstate-binding protein wtpA;                                                                                                 |



|   |        |    |                                                                                                                                                                                                            |
|---|--------|----|------------------------------------------------------------------------------------------------------------------------------------------------------------------------------------------------------------|
| P | Q8U7G2 | CC | Part of the ABC transporter complex MetNIQ involved in methionine import                                                                                                                                   |
| P | Q8U7G2 | DE | Methionine import ATP-binding protein MetN;                                                                                                                                                                |
| P | Q8U949 | CC | Part of the ABC transporter complex RbsABCD involved in ribose import                                                                                                                                      |
| P | Q8U949 | DE | Ribose import ATP-binding protein RbsA 2;                                                                                                                                                                  |
| P | Q8U9D8 | CC | One of the components of the high-affinity ATP-driven potassium transport (or KDP) system, which catalyzes the hydrolysis of ATP coupled with the exchange of hydrogen and potassium ions (By similarity). |
| P | Q8U9D8 | DE | Potassium-binding and translocating subunit A;                                                                                                                                                             |
| P | Q8U9D8 | DE | Potassium-translocating ATPase A chain;                                                                                                                                                                    |
| P | Q8U9D8 | DE | Potassium-transporting ATPase A chain;                                                                                                                                                                     |
| P | Q8U9D8 | DR | potassium-transporting ATPase activity                                                                                                                                                                     |
| P | Q8U9D9 | CC | One of the components of the high-affinity ATP-driven potassium transport (or KDP) system, which catalyzes the hydrolysis of ATP coupled with the exchange of hydrogen and potassium ions (By similarity). |
| P | Q8U9D9 | DE | Potassium-binding and translocating subunit B;                                                                                                                                                             |
| P | Q8U9D9 | DE | Potassium-translocating ATPase B chain;                                                                                                                                                                    |
| P | Q8U9D9 | DE | Potassium-transporting ATPase B chain;                                                                                                                                                                     |
| P | Q8U9D9 | DR | potassium-transporting ATPase activity                                                                                                                                                                     |
| P | Q8U9E0 | CC | One of the components of the high-affinity ATP-driven potassium transport (or KDP) system, which catalyzes the hydrolysis of ATP coupled with the exchange of hydrogen and potassium ions                  |
| P | Q8U9E0 | DE | Potassium-binding and translocating subunit C;                                                                                                                                                             |
| P | Q8U9E0 | DE | Potassium-translocating ATPase C chain;                                                                                                                                                                    |
| P | Q8U9E0 | DE | Potassium-transporting ATPase C chain;                                                                                                                                                                     |
| P | Q8U9E0 | DR | potassium-transporting ATPase activity                                                                                                                                                                     |
| P | Q8UA73 | CC | Part of the ABC transporter complex CysAW 1F involved in sulfate/thiosulfate import                                                                                                                        |
| P | Q8UA73 | DE | Sulfate-transporting ATPase 2;                                                                                                                                                                             |
| P | Q8UA73 | DE | Sulfate/thiosulfate import ATP-binding protein CysA 2;                                                                                                                                                     |
| P | Q8UA73 | DR | sulfate transmembrane-transporting ATPase activity                                                                                                                                                         |
| P | Q8UA86 | CC | Part of the ABC transporter complex RbsABCD involved in ribose import                                                                                                                                      |
| P | Q8UA86 | DE | Ribose import ATP-binding protein RbsA 1;                                                                                                                                                                  |
| P | Q8UBB7 | DR | glycerol-3-phosphate-transporting ATPase activity                                                                                                                                                          |
| P | Q8UBY6 | CC | Part of the ABC transporter complex ThiBPQ involved in thiamine import                                                                                                                                     |
| P | Q8UBY6 | DE | Thiamine import ATP-binding protein ThiQ;                                                                                                                                                                  |
| P | Q8UC12 | CC | Part of the ABC transporter complex CcmAB involved in the biogenesis of c-type cytochromes; once thought to export heme, this seems not to be the case, but its exact role is uncertain                    |
| P | Q8UC12 | DE | Heme exporter protein A;                                                                                                                                                                                   |
| P | Q8UC12 | DR | heme-transporting ATPase activity                                                                                                                                                                          |
| P | Q8UCD5 | DR | molybdate transmembrane-transporting ATPase activity                                                                                                                                                       |
| P | Q8UCM5 | CC | Part of the ABC transporter complex HmuTUV involved in hemin import                                                                                                                                        |
| P | Q8UCM5 | DE | Hemin import ATP-binding protein HmuV;                                                                                                                                                                     |
| P | Q8UEM1 | CC | H <sup>+</sup> -stimulated, highly selective, manganese uptake system (By similarity).                                                                                                                     |
| P | Q8UEM1 | DE | Probable manganese transport protein mntH;                                                                                                                                                                 |
| P | Q8UF79 | CC | Part of the ABC transporter complex ZnuABC involved in zinc import                                                                                                                                         |
| P | Q8UF79 | DE | Zinc import ATP-binding protein ZnuC;                                                                                                                                                                      |
| P | Q8UF79 | DR | zinc transporting ATPase activity                                                                                                                                                                          |
| P | Q8UH62 | CC | Part of the ABC transporter complex CysAW 1F involved in sulfate/thiosulfate import                                                                                                                        |
| P | Q8UH62 | DE | Sulfate-transporting ATPase 1;                                                                                                                                                                             |
| P | Q8UH62 | DE | Sulfate/thiosulfate import ATP-binding protein CysA 1;                                                                                                                                                     |
| P | Q8UH62 | DR | sulfate transmembrane-transporting ATPase activity                                                                                                                                                         |
| P | Q8UHH1 | CC | Transport of potassium into the cell (By similarity).                                                                                                                                                      |
| P | Q8UHH1 | DE | Probable potassium transport system protein kup 1;                                                                                                                                                         |
| P | Q8UHH1 | DR | potassium ion transmembrane transporter activity                                                                                                                                                           |
| P | Q8UI76 | CC | Part of the ABC transporter complex PstSACB involved in phosphate import                                                                                                                                   |
| P | Q8UI76 | DE | ABC phosphate transporter;                                                                                                                                                                                 |
| P | Q8UI76 | DE | Phosphate import ATP-binding protein PstB;                                                                                                                                                                 |
| P | Q8UI76 | DE | Phosphate-transporting ATPase;                                                                                                                                                                             |
| P | Q8UI76 | DR | inorganic phosphate transmembrane transporter activity                                                                                                                                                     |
| P | Q8UI76 | DR | phosphate transmembrane-transporting ATPase activity                                                                                                                                                       |
| P | Q8UII7 | DR | glycerol-3-phosphate-transporting ATPase activity                                                                                                                                                          |
| P | Q8UIW7 | DR | phosphonate transmembrane-transporting ATPase activity                                                                                                                                                     |
| P | Q8UJL0 | CC | Transport of potassium into the cell (By similarity).                                                                                                                                                      |
| P | Q8UJL0 | DE | Probable potassium transport system protein kup 2;                                                                                                                                                         |
| P | Q8UJL0 | DR | potassium ion transmembrane transporter activity                                                                                                                                                           |

|   |        |    |                                                                                                                                                                               |
|---|--------|----|-------------------------------------------------------------------------------------------------------------------------------------------------------------------------------|
| P | Q8VBW1 | CC | plays an important role in supplying creatine to the brain via the blood-brain barrier                                                                                        |
| P | Q8VBW1 | CC | Required for the uptake of creatine                                                                                                                                           |
| P | Q8VBW1 | DE | Creatine transporter 1;                                                                                                                                                       |
| P | Q8VBW1 | DE | Sodium- and chloride-dependent creatine transporter 1;                                                                                                                        |
| P | Q8VBW1 | DE | Sodium- and chloride-dependent creatine transporter 1;                                                                                                                        |
| P | Q8VBW1 | DR | neurotransmitter:sodium symporter activity                                                                                                                                    |
| P | Q8VCV9 | CC | May function as a sodium-dependent glucose transporter (By similarity).                                                                                                       |
| P | Q8VCV9 | DE | Sodium-dependent glucose transporter 1A;                                                                                                                                      |
| P | Q8VDB9 | DE | Sodium- and chloride-dependent transporter XTRP3A;                                                                                                                            |
| P | Q8VDB9 | DR | neurotransmitter:sodium symporter activity                                                                                                                                    |
| P | Q8VDN2 | CC | This action creates the electrochemical gradient of sodium and potassium ions, providing the energy for active transport of various nutrients (By similarity)                 |
| P | Q8VDN2 | CC | This action creates the electrochemical gradient of sodium and potassium ions, providing the energy for active transport of various nutrients (By similarity)                 |
| P | Q8VDN2 | CC | This is the catalytic component of the active enzyme, which catalyzes the hydrolysis of ATP coupled with the exchange of sodium and potassium ions across the plasma membrane |
| P | Q8VDN2 | CC | This is the catalytic component of the active enzyme, which catalyzes the hydrolysis of ATP coupled with the exchange of sodium and potassium ions across the plasma membrane |
| P | Q8VDN2 | DE | Na <sup>+</sup> /K <sup>+</sup> ATPase alpha-1 subunit;                                                                                                                       |
| P | Q8VDN2 | DE | Na <sup>+</sup> /K <sup>+</sup> ATPase alpha-1 subunit;                                                                                                                       |
| P | Q8VDN2 | DE | Sodium pump subunit alpha-1;                                                                                                                                                  |
| P | Q8VDN2 | DE | Sodium/potassium-transporting ATPase subunit alpha-1;                                                                                                                         |
| P | Q8VDN2 | DE | Sodium/potassium-transporting ATPase subunit alpha-1;                                                                                                                         |
| P | Q8VDN2 | DR | sodium:potassium-exchanging ATPase activity                                                                                                                                   |
| P | Q8VDN2 | DR | sodium:potassium-exchanging ATPase activity                                                                                                                                   |
| P | Q8VDT1 | CC | Involved in sodium-dependent transport of D-mannose, D- glucose and D-fructose (By similarity).                                                                               |
| P | Q8VDT1 | CC | Involved in sodium-dependent transport of D-mannose, D- glucose and D-fructose (By similarity).                                                                               |
| P | Q8VDT1 | DE | Na <sup>+</sup> /glucose cotransporter 4;                                                                                                                                     |
| P | Q8VDT1 | DE | Na <sup>+</sup> /glucose cotransporter 4;                                                                                                                                     |
| P | Q8VDT1 | DE | Sodium/glucose cotransporter 4;                                                                                                                                               |
| P | Q8VDT1 | DE | Sodium/glucose cotransporter 4;                                                                                                                                               |
| P | Q8VEM8 | CC | Phosphate is cotransported with H <sup>+</sup> (By similarity).                                                                                                               |
| P | Q8VEM8 | CC | Transport of phosphate groups from the cytosol to mitochondrial matrix                                                                                                        |
| P | Q8VEM8 | DE | Phosphate carrier protein, mitochondrial;                                                                                                                                     |
| P | Q8VEM8 | DE | Phosphate transport protein;                                                                                                                                                  |
| P | Q8VHD6 | CC | Facilitative glucose transporter (By similarity).                                                                                                                             |
| P | Q8VHD6 | DE | Glucose transporter type 10;                                                                                                                                                  |
| P | Q8VHD6 | DE | Solute carrier family 2, facilitated glucose transporter member 10;                                                                                                           |
| P | Q8VHL0 | CC | Mediates urea transport in erythrocytes (By similarity).                                                                                                                      |
| P | Q8VHL0 | CC | Specialized low-affinity urea transporter                                                                                                                                     |
| P | Q8VHL0 | DE | Urea transporter 1;                                                                                                                                                           |
| P | Q8VHL0 | DE | Urea transporter B;                                                                                                                                                           |
| P | Q8VHL0 | DE | Urea transporter, erythrocyte;                                                                                                                                                |
| P | Q8VHL0 | DR | urea transmembrane transporter activity                                                                                                                                       |
| P | Q8VI23 | CC | Cation/chloride cotransporter that may play a role in the control of keratinocyte proliferation (By similarity).                                                              |
| P | Q8VPE6 | DR | copper-exporting ATPase activity                                                                                                                                              |
| P | Q8VXB1 | CC | High-affinity potassium transporter (By similarity).                                                                                                                          |
| P | Q8VXB1 | DE | Putative potassium transporter 12;                                                                                                                                            |
| P | Q8VXB1 | DR | potassium ion transmembrane transporter activity                                                                                                                              |
| P | Q8VXB5 | CC | High-affinity potassium transporter (By similarity).                                                                                                                          |
| P | Q8VXB5 | DE | Putative potassium transporter 8;                                                                                                                                             |
| P | Q8VXB5 | DR | potassium ion transmembrane transporter activity                                                                                                                              |
| P | Q8VYM2 | CC | Acts as a H <sup>+</sup> :phosphate symporter in both low- and high-Pi conditions                                                                                             |
| P | Q8VYM2 | CC | High-affinity transporter for external inorganic phosphate                                                                                                                    |
| P | Q8VYM2 | DE | Inorganic phosphate transporter 1-1;                                                                                                                                          |
| P | Q8VYM2 | DR | inorganic phosphate transmembrane transporter activity                                                                                                                        |
| P | Q8VZ80 | CC | Can transport the cyclic polyol myo- inositol and different hexoses, pentoses (including ribose), tetroses and sugar alcohols.                                                |
| P | Q8VZ80 | CC | Plasma membrane broad-spectrum sugar-proton symporter                                                                                                                         |
| P | Q8VZ80 | DE | Sugar-proton symporter PLT5;                                                                                                                                                  |

|   |        |    |                                                                                                                                                                                                                                                                         |
|---|--------|----|-------------------------------------------------------------------------------------------------------------------------------------------------------------------------------------------------------------------------------------------------------------------------|
| P | Q8VZ80 | DR | sugar:hydrogen symporter activity                                                                                                                                                                                                                                       |
| P | Q8VZT3 | CC | Sugar transporter (Potential).                                                                                                                                                                                                                                          |
| P | Q8VZT3 | DE | Sugar transporter ERD6-like 12;                                                                                                                                                                                                                                         |
| P | Q8VZT3 | DE | Sugar transporter-like protein 5;                                                                                                                                                                                                                                       |
| P | Q8VZW1 | CC | Water channel probably required to promote glycerol permeability and water transport across cell membranes.                                                                                                                                                             |
| P | Q8VZW1 | DR | water channel activity                                                                                                                                                                                                                                                  |
| P | Q8W036 | CC | Aquaporins facilitate the transport of water and small neutral solutes across cell membranes (By similarity).                                                                                                                                                           |
| P | Q8W037 | CC | Low water transport activity in yeast cells.                                                                                                                                                                                                                            |
| P | Q8W245 | CC | Probably mediates zinc uptake from the rhizosphere (By similarity).                                                                                                                                                                                                     |
| P | Q8W245 | DE | Probable zinc transporter 10;                                                                                                                                                                                                                                           |
| P | Q8W245 | DR | zinc ion transmembrane transporter activity                                                                                                                                                                                                                             |
| P | Q8W246 | CC | Probably mediates zinc uptake from the rhizosphere (By similarity).                                                                                                                                                                                                     |
| P | Q8W246 | DE | Zinc transporter 7;                                                                                                                                                                                                                                                     |
| P | Q8W246 | DR | zinc ion transmembrane transporter activity                                                                                                                                                                                                                             |
| P | Q8W414 | CC | Probable potassium transporter.                                                                                                                                                                                                                                         |
| P | Q8W414 | DE | Potassium transporter 6;                                                                                                                                                                                                                                                |
| P | Q8W414 | DR | potassium ion transmembrane transporter activity                                                                                                                                                                                                                        |
| P | Q8WUM9 | CC | Sodium-phosphate symporter which plays a fundamental housekeeping role in phosphate transport, such as absorbing phosphate from interstitial fluid for normal cellular functions such as cellular metabolism, signal transduction, and nucleic acid and lipid synthesis |
| P | Q8WUM9 | DE | Phosphate transporter 1;                                                                                                                                                                                                                                                |
| P | Q8WUM9 | DE | Sodium-dependent phosphate transporter 1;                                                                                                                                                                                                                               |
| P | Q8WUM9 | DR | inorganic phosphate transmembrane transporter activity                                                                                                                                                                                                                  |
| P | Q8WUM9 | DR | sodium-dependent phosphate transmembrane transporter activity                                                                                                                                                                                                           |
| P | Q8WW15 | CC | Choline transporter                                                                                                                                                                                                                                                     |
| P | Q8WW15 | DE | Choline transporter-like protein 1;                                                                                                                                                                                                                                     |
| P | Q8WW15 | DR | choline transmembrane transporter activity                                                                                                                                                                                                                              |
| P | Q8WWX8 | CC | Exhibits stereospecific cotransport of both D-glucose and D- xylose                                                                                                                                                                                                     |
| P | Q8WWX8 | CC | Involved in the sodium-dependent cotransport of myo- inositol (MI) with a Na+:MI stoichiometry of 2:1                                                                                                                                                                   |
| P | Q8WWX8 | DE | Na+/myo-inositol cotransporter 2;                                                                                                                                                                                                                                       |
| P | Q8WWX8 | DE | Sodium-dependent glucose cotransporter;                                                                                                                                                                                                                                 |
| P | Q8WWX8 | DE | Sodium-dependent glucose cotransporter;                                                                                                                                                                                                                                 |
| P | Q8WWX8 | DE | Sodium/glucose cotransporter KST1;                                                                                                                                                                                                                                      |
| P | Q8WWX8 | DE | Sodium/glucose cotransporter KST1;                                                                                                                                                                                                                                      |
| P | Q8WWX8 | DE | Sodium/myo-inositol cotransporter 2;                                                                                                                                                                                                                                    |
| P | Q8X3T0 | CC | Uptake of L-rhamnose across the boundary membrane with the concomitant transport of protons into the cell (symport system) (By similarity).                                                                                                                             |
| P | Q8X3T0 | DE | L-rhamnose-H <sup>+</sup> transport protein;                                                                                                                                                                                                                            |
| P | Q8X3T0 | DE | L-rhamnose-proton symporter;                                                                                                                                                                                                                                            |
| P | Q8X400 | CC | Involved in zinc efflux across the cytoplasmic membrane, thus reducing zinc accumulation in the cytoplasm and rendering bacteria more resistant to zinc it may contribute to zinc homeostasis at low concentrations of zinc (By similarity)                             |
| P | Q8X400 | CC | Zinc transporter zitB;                                                                                                                                                                                                                                                  |
| P | Q8X400 | DE | Zinc transporter zitB;                                                                                                                                                                                                                                                  |
| P | Q8X4L6 | CC | Part of the ABC transporter complex NikABCDE involved in nickel import                                                                                                                                                                                                  |
| P | Q8X4L6 | DE | Nickel import ATP-binding protein NikE;                                                                                                                                                                                                                                 |
| P | Q8X4L6 | DR | Nickel-importing ATPase activity                                                                                                                                                                                                                                        |
| P | Q8X4L7 | CC | Part of the ABC transporter complex BtuCDF involved in vitamin B12 import                                                                                                                                                                                               |
| P | Q8X4L7 | DE | Vitamin B12 import system permease protein BtuC;                                                                                                                                                                                                                        |
| P | Q8X4V7 | CC | Part of the ABC transporter complex ModABC involved in molybdenum import                                                                                                                                                                                                |
| P | Q8X4V7 | DE | Molybdenum import ATP-binding protein ModC;                                                                                                                                                                                                                             |
| P | Q8X4V7 | DR | molybdenum ion transmembrane transporter activity                                                                                                                                                                                                                       |
| P | Q8X5I6 | CC | Part of the ABC transporter complex TauABC involved in taurine import                                                                                                                                                                                                   |
| P | Q8X5I6 | DE | Taurine import ATP-binding protein TauB;                                                                                                                                                                                                                                |
| P | Q8X5I6 | DR | taurine-transporting ATPase activity                                                                                                                                                                                                                                    |
| P | Q8X5N2 | CC | Part of the ABC transporter complex HmuTUV involved in hemin import                                                                                                                                                                                                     |
| P | Q8X5N2 | DE | Hemin import ATP-binding protein HmuV;                                                                                                                                                                                                                                  |
| P | Q8X5Q4 | CC | Part of the ABC transporter complex RbsABCD involved in ribose import                                                                                                                                                                                                   |
| P | Q8X5Q4 | DE | Ribose import ATP-binding protein RbsA 2;                                                                                                                                                                                                                               |
| P | Q8X5U1 | CC | Part of the ABC transporter complex NikABCDE involved in nickel import                                                                                                                                                                                                  |
| P | Q8X5U1 | DE | Nickel import ATP-binding protein NikD;                                                                                                                                                                                                                                 |
| P | Q8X5U1 | DR | nickel-transporting ATPase activity                                                                                                                                                                                                                                     |
| P | Q8X5W0 | CC | Part of the ABC transporter complex BtuCDF involved in vitamin B12 import                                                                                                                                                                                               |

|   |        |    |                                                                                                                                                                                                            |
|---|--------|----|------------------------------------------------------------------------------------------------------------------------------------------------------------------------------------------------------------|
| P | Q8X5W0 | DE | Vitamin B12 import ATP-binding protein BtuD;                                                                                                                                                               |
| P | Q8X5W0 | DE | Vitamin B12-transporting ATPase;                                                                                                                                                                           |
| P | Q8X691 | CC | Required for cytosine transport into the cell.                                                                                                                                                             |
| P | Q8X691 | DE | Cytosine permease;                                                                                                                                                                                         |
| P | Q8X6U5 | DR | glycerol-3-phosphate-transporting ATPase activity                                                                                                                                                          |
| P | Q8X794 | DE | Voltage-gated ClC-type chloride channel ClcB;                                                                                                                                                              |
| P | Q8X794 | DR | voltage-gated chloride channel activity                                                                                                                                                                    |
| P | Q8X800 | CC | Part of the binding-protein-dependent transport system for D-methionine and the toxic methionine analog alpha-methyl- methionine                                                                           |
| P | Q8X800 | DE | D-methionine transport system permease protein metI;                                                                                                                                                       |
| P | Q8X878 | CC | Transport system that facilitates potassium-efflux, possibly by potassium-proton antiport (By similarity).                                                                                                 |
| P | Q8X878 | DE | Glutathione-regulated potassium-efflux system protein kefB;                                                                                                                                                |
| P | Q8X878 | DE | K <sup>+</sup> /H <sup>+</sup> antiporter;                                                                                                                                                                 |
| P | Q8X878 | DE | NEM-activable K <sup>+</sup> /H <sup>+</sup> antiporter;                                                                                                                                                   |
| P | Q8X878 | DR | glutathione-regulated potassium exporter activity                                                                                                                                                          |
| P | Q8X8E3 | DE | Lipoprotein-releasing system ATP-binding protein LolD;                                                                                                                                                     |
| P | Q8X8E3 | DR | lipoprotein transporter activity                                                                                                                                                                           |
| P | Q8X8V9 | CC | This protein is a component of a D-methionine permease, a binding protein-dependent, ATP-driven transport system (By similarity).                                                                          |
| P | Q8X8V9 | DE | D-methionine-binding lipoprotein metQ;                                                                                                                                                                     |
| P | Q8X8Z0 | CC | binds vitamin B12 and delivers it to the periplasmic surface of BtuC (By similarity)                                                                                                                       |
| P | Q8X8Z0 | CC | Part of the ABC transporter complex BtuCDF involved in vitamin B12 import                                                                                                                                  |
| P | Q8X968 | DE | Aromatic amino acid transport protein AroP;                                                                                                                                                                |
| P | Q8X968 | DE | General aromatic amino acid permease;                                                                                                                                                                      |
| P | Q8X9F8 | CC | One of the components of the high-affinity ATP-driven potassium transport (or KDP) system, which catalyzes the hydrolysis of ATP coupled with the exchange of hydrogen and potassium ions (By similarity). |
| P | Q8X9F8 | DE | Potassium-binding and translocating subunit A;                                                                                                                                                             |
| P | Q8X9F8 | DE | Potassium-translocating ATPase A chain;                                                                                                                                                                    |
| P | Q8X9F8 | DE | Potassium-transporting ATPase A chain;                                                                                                                                                                     |
| P | Q8X9F8 | DR | potassium-transporting ATPase activity                                                                                                                                                                     |
| P | Q8X9F9 | CC | One of the components of the high-affinity ATP-driven potassium transport (or KDP) system, which catalyzes the hydrolysis of ATP coupled with the exchange of hydrogen and potassium ions (By similarity). |
| P | Q8X9F9 | DE | Potassium-binding and translocating subunit B;                                                                                                                                                             |
| P | Q8X9F9 | DE | Potassium-translocating ATPase B chain;                                                                                                                                                                    |
| P | Q8X9F9 | DE | Potassium-transporting ATPase B chain;                                                                                                                                                                     |
| P | Q8X9F9 | DR | potassium-transporting ATPase activity                                                                                                                                                                     |
| P | Q8X9G0 | CC | One of the components of the high-affinity ATP-driven potassium transport (or KDP) system, which catalyzes the hydrolysis of ATP coupled with the exchange of hydrogen and potassium ions                  |
| P | Q8X9G0 | DE | Potassium-binding and translocating subunit C;                                                                                                                                                             |
| P | Q8X9G0 | DE | Potassium-translocating ATPase C chain;                                                                                                                                                                    |
| P | Q8X9G0 | DE | Potassium-transporting ATPase C chain;                                                                                                                                                                     |
| P | Q8X9G0 | DR | potassium-transporting ATPase activity                                                                                                                                                                     |
| P | Q8XA06 | CC | Part of the ABC transporter complex ThiBPQ involved in thiamine import                                                                                                                                     |
| P | Q8XA06 | DE | Thiamine import ATP-binding protein ThiQ;                                                                                                                                                                  |
| P | Q8XA20 | CC | Transport system that facilitates potassium-efflux, possibly by potassium-proton antiport (By similarity).                                                                                                 |
| P | Q8XA20 | DE | Glutathione-regulated potassium-efflux system protein kefC;                                                                                                                                                |
| P | Q8XA20 | DE | K <sup>+</sup> /H <sup>+</sup> antiporter;                                                                                                                                                                 |
| P | Q8XA63 | CC | Na <sup>+</sup> /H <sup>+</sup> antiporter that extrudes sodium in exchange for external protons (By similarity)                                                                                           |
| P | Q8XA63 | DE | Na <sup>+</sup> /H <sup>+</sup> antiporter nhaA;                                                                                                                                                           |
| P | Q8XA63 | DE | Sodium/proton antiporter nhaA;                                                                                                                                                                             |
| P | Q8XAW7 | CC | Part of the ABC transporter complex RbsABCD involved in ribose import                                                                                                                                      |
| P | Q8XAW7 | DE | Ribose import ATP-binding protein RbsA 1;                                                                                                                                                                  |
| P | Q8XAW9 | CC | Responsible for the low-affinity transport of potassium into the cell, with the probable concomitant uptake of protons (symport system) (By similarity).                                                   |
| P | Q8XAW9 | DE | Kup system potassium uptake protein;                                                                                                                                                                       |
| P | Q8XAW9 | DE | Low affinity potassium transport system protein kup;                                                                                                                                                       |
| P | Q8XAW9 | DR | potassium ion transmembrane transporter activity                                                                                                                                                           |
| P | Q8XB33 | CC | Involved in tryptophan transport across the cytoplasmic membrane                                                                                                                                           |
| P | Q8XB33 | CC | plays a role in transporting tryptophan which is to be used catabolically (By similarity)                                                                                                                  |
| P | Q8XB33 | DE | Low affinity tryptophan permease;                                                                                                                                                                          |

|   |        |    |                                                                                                                                                                                                            |
|---|--------|----|------------------------------------------------------------------------------------------------------------------------------------------------------------------------------------------------------------|
| P | Q8XBJ8 | CC | part of the ABC transporter complex CysAW 1P involved in sulfate/inosinate import                                                                                                                          |
| P | Q8XBJ8 | DE | Sulfate/thiosulfate import ATP-binding protein CysA;                                                                                                                                                       |
| P | Q8XBK4 | CC | Catalyzes the uptake of tartrate in exchange for intracellular succinate                                                                                                                                   |
| P | Q8XBK4 | DE | L-tartrate/succinate antiporter;                                                                                                                                                                           |
| P | Q8XD10 | CC | Important to control the intracellular level of arginine and the correct balance between arginine and lysine (By similarity).                                                                              |
| P | Q8XD24 | CC | Involved in copper export (By similarity).                                                                                                                                                                 |
| P | Q8XD24 | DE | Copper-exporting P-type ATPase A;                                                                                                                                                                          |
| P | Q8XD24 | DR | copper-exporting ATPase activity                                                                                                                                                                           |
| P | Q8XDM1 | CC | Part of the ABC transporter complex XylFGH involved in xylose import                                                                                                                                       |
| P | Q8XDM1 | DE | Xylose import ATP-binding protein XylG;                                                                                                                                                                    |
| P | Q8XDM1 | DR | D-xylose-importing ATPase activity                                                                                                                                                                         |
| P | Q8XDV7 | DR | phosphonate transmembrane-transporting ATPase activity                                                                                                                                                     |
| P | Q8XE58 | CC | Part of the ABC transporter complex CcmAB involved in the biogenesis of c-type cytochromes; once thought to export heme, this seems not to be the case, but its exact role is uncertain                    |
| P | Q8XE58 | DE | Heme exporter protein A;                                                                                                                                                                                   |
| P | Q8XE58 | DR | heme-transporting ATPase activity                                                                                                                                                                          |
| P | Q8XIZ5 | CC | part of the ABC transporter complex PotABCD involved in spermidine/putrescine import                                                                                                                       |
| P | Q8XIZ5 | CC | part of the ABC transporter complex PotABCD involved in spermidine/putrescine import                                                                                                                       |
| P | Q8XIZ5 | DE | Spermidine/putrescine import ATP-binding protein PotA;                                                                                                                                                     |
| P | Q8XIZ5 | DE | Spermidine/putrescine import ATP-binding protein PotA;                                                                                                                                                     |
| P | Q8XJX3 | CC | Part of the ABC transporter complex RbsABCD involved in ribose import                                                                                                                                      |
| P | Q8XJX3 | DE | Ribose import ATP-binding protein RbsA;                                                                                                                                                                    |
| P | Q8XMP8 | CC | Part of the ABC transporter complex PstSACB involved in phosphate import                                                                                                                                   |
| P | Q8XMP8 | DE | ABC phosphate transporter;                                                                                                                                                                                 |
| P | Q8XMP8 | DE | Phosphate import ATP-binding protein PstB;                                                                                                                                                                 |
| P | Q8XMP8 | DE | Phosphate-transporting ATPase;                                                                                                                                                                             |
| P | Q8XMP8 | DR | inorganic phosphate transmembrane transporter activity                                                                                                                                                     |
| P | Q8XMP8 | DR | phosphate transmembrane-transporting ATPase activity                                                                                                                                                       |
| P | Q8XNY9 | DR | cobalt ion transmembrane transporter activity                                                                                                                                                              |
| P | Q8XPK6 | CC | Part of the ABC transporter complex XylFGH involved in xylose import                                                                                                                                       |
| P | Q8XPK6 | DE | Xylose import ATP-binding protein XylG;                                                                                                                                                                    |
| P | Q8XPK6 | DR | D-xylose-importing ATPase activity                                                                                                                                                                         |
| P | Q8XR16 | CC | Transport of potassium into the cell (By similarity).                                                                                                                                                      |
| P | Q8XR16 | DE | Probable potassium transport system protein kup 1;                                                                                                                                                         |
| P | Q8XR16 | DR | potassium ion transmembrane transporter activity                                                                                                                                                           |
| P | Q8XSF6 | CC | H+-stimulated, highly selective, manganese uptake system (By similarity).                                                                                                                                  |
| P | Q8XSF6 | DE | Probable manganese transport protein mntH;                                                                                                                                                                 |
| P | Q8XU10 | CC | One of the components of the high-affinity ATP-driven potassium transport (or KDP) system, which catalyzes the hydrolysis of ATP coupled with the exchange of hydrogen and potassium ions                  |
| P | Q8XU10 | DE | Potassium-binding and translocating subunit C;                                                                                                                                                             |
| P | Q8XU10 | DE | Potassium-translocating ATPase C chain;                                                                                                                                                                    |
| P | Q8XU10 | DE | Potassium-transporting ATPase C chain;                                                                                                                                                                     |
| P | Q8XU10 | DR | potassium-transporting ATPase activity                                                                                                                                                                     |
| P | Q8XU11 | CC | One of the components of the high-affinity ATP-driven potassium transport (or KDP) system, which catalyzes the hydrolysis of ATP coupled with the exchange of hydrogen and potassium ions (By similarity). |
| P | Q8XU11 | DE | Potassium-binding and translocating subunit B;                                                                                                                                                             |
| P | Q8XU11 | DE | Potassium-translocating ATPase B chain;                                                                                                                                                                    |
| P | Q8XU11 | DE | Potassium-transporting ATPase B chain;                                                                                                                                                                     |
| P | Q8XU11 | DR | potassium-transporting ATPase activity                                                                                                                                                                     |
| P | Q8XU12 | CC | One of the components of the high-affinity ATP-driven potassium transport (or KDP) system, which catalyzes the hydrolysis of ATP coupled with the exchange of hydrogen and potassium ions (By similarity). |
| P | Q8XU12 | DE | Potassium-binding and translocating subunit A;                                                                                                                                                             |
| P | Q8XU12 | DE | Potassium-translocating ATPase A chain;                                                                                                                                                                    |
| P | Q8XU12 | DE | Potassium-transporting ATPase A chain;                                                                                                                                                                     |
| P | Q8XU12 | DR | potassium-transporting ATPase activity                                                                                                                                                                     |
| P | Q8XVS2 | DR | L-arabinose-importing ATPase activity                                                                                                                                                                      |
| P | Q8XYY5 | CC | Transport of potassium into the cell (By similarity).                                                                                                                                                      |
| P | Q8XYY5 | DE | Probable potassium transport system protein kup 2;                                                                                                                                                         |
| P | Q8XYY5 | DR | potassium ion transmembrane transporter activity                                                                                                                                                           |
| P | Q8XZ72 | CC | Part of the ABC transporter complex PstSACB involved in phosphate import                                                                                                                                   |

|   |        |    |                                                                                                                                                                                                            |
|---|--------|----|------------------------------------------------------------------------------------------------------------------------------------------------------------------------------------------------------------|
| P | Q8XZ72 | DE | ABC phosphate transporter;                                                                                                                                                                                 |
| P | Q8XZ72 | DE | Phosphate import ATP-binding protein PstB;                                                                                                                                                                 |
| P | Q8XZ72 | DE | Phosphate-transporting ATPase;                                                                                                                                                                             |
| P | Q8XZ72 | DR | inorganic phosphate transmembrane transporter activity                                                                                                                                                     |
| P | Q8XZ72 | DR | phosphate transmembrane-transporting ATPase activity                                                                                                                                                       |
| P | Q8XZP8 | CC | Part of the ABC transporter complex CysA W 11 involved in sulfate/thiosulfate import                                                                                                                       |
| P | Q8XZP8 | DE | Sulfate-transporting ATPase;                                                                                                                                                                               |
| P | Q8XZP8 | DE | Sulfate/thiosulfate import ATP-binding protein CysA;                                                                                                                                                       |
| P | Q8XZP8 | DR | sulfate transmembrane-transporting ATPase activity                                                                                                                                                         |
| P | Q8XZX8 | DR | glycerol-3-phosphate-transporting ATPase activity                                                                                                                                                          |
| P | Q8Y0C6 | DE | Lipoprotein-releasing system ATP-binding protein LolD;                                                                                                                                                     |
| P | Q8Y0C6 | DR | lipoprotein transporter activity                                                                                                                                                                           |
| P | Q8Y2K5 | DR | sodium:dicarboxylate symporter activity                                                                                                                                                                    |
| P | Q8Y3Z6 | CC | One of the components of the high-affinity ATP-driven potassium transport (or KDP) system, which catalyzes the hydrolysis of ATP coupled with the exchange of hydrogen and potassium ions (By similarity). |
| P | Q8Y3Z6 | DE | Potassium-binding and translocating subunit A;                                                                                                                                                             |
| P | Q8Y3Z6 | DE | Potassium-translocating ATPase A chain;                                                                                                                                                                    |
| P | Q8Y3Z6 | DE | Potassium-transporting ATPase A chain;                                                                                                                                                                     |
| P | Q8Y3Z6 | DR | potassium-transporting ATPase activity                                                                                                                                                                     |
| P | Q8Y3Z7 | CC | One of the components of the high-affinity ATP-driven potassium transport (or KDP) system, which catalyzes the hydrolysis of ATP coupled with the exchange of hydrogen and potassium ions (By similarity). |
| P | Q8Y3Z7 | DE | Potassium-binding and translocating subunit B;                                                                                                                                                             |
| P | Q8Y3Z7 | DE | Potassium-translocating ATPase B chain;                                                                                                                                                                    |
| P | Q8Y3Z7 | DE | Potassium-transporting ATPase B chain;                                                                                                                                                                     |
| P | Q8Y3Z7 | DR | potassium-transporting ATPase activity                                                                                                                                                                     |
| P | Q8Y3Z8 | CC | One of the components of the high-affinity ATP-driven potassium transport (or KDP) system, which catalyzes the hydrolysis of ATP coupled with the exchange of hydrogen and potassium ions                  |
| P | Q8Y3Z8 | DE | Potassium-binding and translocating subunit C;                                                                                                                                                             |
| P | Q8Y3Z8 | DE | Potassium-translocating ATPase C chain;                                                                                                                                                                    |
| P | Q8Y3Z8 | DE | Potassium-transporting ATPase C chain;                                                                                                                                                                     |
| P | Q8Y3Z8 | DR | potassium-transporting ATPase activity                                                                                                                                                                     |
| P | Q8Y4E9 | CC | Part of the ABC transporter complex PstSACB involved in phosphate import                                                                                                                                   |
| P | Q8Y4E9 | DE | ABC phosphate transporter 2;                                                                                                                                                                               |
| P | Q8Y4E9 | DE | Phosphate import ATP-binding protein PstB 2;                                                                                                                                                               |
| P | Q8Y4E9 | DE | Phosphate-transporting ATPase 2;                                                                                                                                                                           |
| P | Q8Y4E9 | DR | inorganic phosphate transmembrane transporter activity                                                                                                                                                     |
| P | Q8Y4E9 | DR | phosphate transmembrane-transporting ATPase activity                                                                                                                                                       |
| P | Q8Y4L8 | CC | Part of the ABC transporter complex MetNIQ involved in methionine import                                                                                                                                   |
| P | Q8Y4L8 | DE | Methionine import ATP-binding protein MetN 2;                                                                                                                                                              |
| P | Q8Y651 | CC | This protein is probably a component of a manganese permease, a binding protein-dependent, ATP-driven transport system                                                                                     |
| P | Q8Y651 | DE | Manganese transport system ATP-binding protein MntB;                                                                                                                                                       |
| P | Q8Y652 | CC | This protein is probably a component of a manganese permease, a binding protein-dependent, ATP-driven transport system (By similarity).                                                                    |
| P | Q8Y652 | DE | Manganese transport system membrane protein mntC;                                                                                                                                                          |
| P | Q8Y653 | CC | This protein is probably a component of a manganese permease, a binding protein-dependent, ATP-driven transport system (By similarity).                                                                    |
| P | Q8Y653 | DE | Manganese-binding lipoprotein mntA;                                                                                                                                                                        |
| P | Q8Y773 | CC | H+-stimulated, highly selective, manganese uptake system (By similarity).                                                                                                                                  |
| P | Q8Y773 | DE | Probable manganese transport protein mntH;                                                                                                                                                                 |
| P | Q8Y8T6 | CC | Part of the ABC transporter complex PotABCD involved in spermidine/putrescine import                                                                                                                       |
| P | Q8Y8T6 | CC | Part of the ABC transporter complex PotABCD involved in spermidine/putrescine import                                                                                                                       |
| P | Q8Y8T6 | DE | Spermidine/putrescine import ATP-binding protein PotA;                                                                                                                                                     |
| P | Q8Y8T6 | DE | Spermidine/putrescine import ATP-binding protein PotA;                                                                                                                                                     |
| P | Q8Y9K8 | CC | May mediate the efflux of lincomycin (By similarity).                                                                                                                                                      |
| P | Q8Y9K8 | DE | Lincomycin resistance protein lmrB;                                                                                                                                                                        |
| P | Q8YA75 | CC | Part of the ABC transporter complex MetNIQ involved in methionine import                                                                                                                                   |
| P | Q8YA75 | DE | Methionine import ATP-binding protein MetN 1;                                                                                                                                                              |
| P | Q8YCB1 | DR | glycerol-3-phosphate-transporting ATPase activity                                                                                                                                                          |
| P | Q8YCN7 | CC | Part of the ABC transporter complex NikABCDE involved in nickel import                                                                                                                                     |
| P | Q8YCN7 | DE | Nickel import ATP-binding protein NikE;                                                                                                                                                                    |
| P | Q8YCN7 | DR | nickel-transporting ATPase activity                                                                                                                                                                        |

|   |        |    |                                                                                                                                                                                                            |
|---|--------|----|------------------------------------------------------------------------------------------------------------------------------------------------------------------------------------------------------------|
| P | Q8YCN8 | CC | Part of the ABC transporter complex NikABCDE involved in nickel import                                                                                                                                     |
| P | Q8YCN8 | DE | Nickel import ATP-binding protein NikD;                                                                                                                                                                    |
| P | Q8YCN8 | DR | nickel-transporting ATPase activity                                                                                                                                                                        |
| P | Q8YDJ7 | CC | Involved in the high-affinity zinc uptake transport system                                                                                                                                                 |
| P | Q8YDJ7 | DE | High-affinity zinc uptake system protein znuA;                                                                                                                                                             |
| P | Q8YDJ8 | CC | Part of the ABC transporter complex ZnuABC involved in zinc import                                                                                                                                         |
| P | Q8YDJ8 | DE | Zinc import ATP-binding protein ZnuC;                                                                                                                                                                      |
| P | Q8YDJ8 | DR | zinc transporting ATPase activity                                                                                                                                                                          |
| P | Q8YDN0 | CC | Part of the ABC transporter complex XylFGH involved in xylose import                                                                                                                                       |
| P | Q8YDN0 | DE | Xylose import ATP-binding protein XylG;                                                                                                                                                                    |
| P | Q8YE15 | CC | Part of the ABC transporter complex ModABC involved in molybdenum import                                                                                                                                   |
| P | Q8YE15 | DE | Molybdenum import ATP-binding protein ModC;                                                                                                                                                                |
| P | Q8YE15 | DR | molybdenum ion transmembrane transporter activity                                                                                                                                                          |
| P | Q8YFI5 | CC | Na <sup>+</sup> /H <sup>+</sup> antiporter that extrudes sodium in exchange for external protons (By similarity).                                                                                          |
| P | Q8YFI5 | DE | Na <sup>+</sup> /H <sup>+</sup> antiporter nhaA;                                                                                                                                                           |
| P | Q8YFI5 | DE | Sodium/proton antiporter nhaA;                                                                                                                                                                             |
| P | Q8YGM0 | DE | Lipoprotein-releasing system ATP-binding protein LolD;                                                                                                                                                     |
| P | Q8YGM0 | DR | lipoprotein transporter activity                                                                                                                                                                           |
| P | Q8YI23 | CC | Transport of potassium into the cell (By similarity).                                                                                                                                                      |
| P | Q8YI23 | DE | Probable potassium transport system protein kup;                                                                                                                                                           |
| P | Q8YI23 | DR | potassium ion transmembrane transporter activity                                                                                                                                                           |
| P | Q8YJ02 | CC | Part of the ABC transporter complex thiBPQ involved in thiamine import (By similarity).                                                                                                                    |
| P | Q8YJ02 | DE | Thiamine-binding periplasmic protein;                                                                                                                                                                      |
| P | Q8YJ03 | CC | Part of the ABC transporter complex thiBPQ involved in thiamine import                                                                                                                                     |
| P | Q8YJ03 | DE | Thiamine transport system permease protein thiP;                                                                                                                                                           |
| P | Q8YJ04 | CC | Part of the ABC transporter complex ThiBPQ involved in thiamine import                                                                                                                                     |
| P | Q8YJ04 | DE | Thiamine import ATP-binding protein ThiQ;                                                                                                                                                                  |
| P | Q8YK28 | DR | phosphonate transmembrane-transporting ATPase activity                                                                                                                                                     |
| P | Q8YM92 | CC | Part of the ABC transporter complex PotABCD involved in spermidine/putrescine import                                                                                                                       |
| P | Q8YM92 | CC | Part of the ABC transporter complex PotABCD involved in spermidine/putrescine import                                                                                                                       |
| P | Q8YM92 | DE | Spermidine/putrescine import ATP-binding protein PotA;                                                                                                                                                     |
| P | Q8YM92 | DE | Spermidine/putrescine import ATP-binding protein PotA;                                                                                                                                                     |
| P | Q8YNJ3 | CC | Part of the ABC transporter complex PstSACB involved in phosphate import                                                                                                                                   |
| P | Q8YNJ3 | DE | ABC phosphate transporter 3;                                                                                                                                                                               |
| P | Q8YNJ3 | DE | Phosphate import ATP-binding protein PstB 3;                                                                                                                                                               |
| P | Q8YNJ3 | DE | Phosphate-transporting ATPase 3;                                                                                                                                                                           |
| P | Q8YNJ3 | DR | inorganic phosphate transmembrane transporter activity                                                                                                                                                     |
| P | Q8YNJ3 | DR | phosphate transmembrane-transporting ATPase activity                                                                                                                                                       |
| P | Q8YPE8 | CC | One of the components of the high-affinity ATP-driven potassium transport (or KDP) system, which catalyzes the hydrolysis of ATP coupled with the exchange of hydrogen and potassium ions (By similarity). |
| P | Q8YPE8 | DE | Potassium-binding and translocating subunit A;                                                                                                                                                             |
| P | Q8YPE8 | DE | Potassium-translocating ATPase A chain;                                                                                                                                                                    |
| P | Q8YPE8 | DE | Potassium-transporting ATPase A chain;                                                                                                                                                                     |
| P | Q8YPE8 | DR | potassium-transporting ATPase activity                                                                                                                                                                     |
| P | Q8YPE9 | CC | One of the components of the high-affinity ATP-driven potassium transport (or KDP) system, which catalyzes the hydrolysis of ATP coupled with the exchange of hydrogen and potassium ions (By similarity). |
| P | Q8YPE9 | DE | Potassium-binding and translocating subunit B 1;                                                                                                                                                           |
| P | Q8YPE9 | DE | Potassium-translocating ATPase B chain 1;                                                                                                                                                                  |
| P | Q8YPE9 | DE | Potassium-transporting ATPase B chain 1;                                                                                                                                                                   |
| P | Q8YPE9 | DR | potassium-transporting ATPase activity                                                                                                                                                                     |
| P | Q8YPF1 | CC | One of the components of the high-affinity ATP-driven potassium transport (or KDP) system, which catalyzes the hydrolysis of ATP coupled with the exchange of hydrogen and potassium ions                  |
| P | Q8YPF1 | DE | Potassium-binding and translocating subunit C 2;                                                                                                                                                           |
| P | Q8YPF1 | DE | Potassium-translocating ATPase C chain 2;                                                                                                                                                                  |
| P | Q8YPF1 | DE | Potassium-transporting ATPase C chain 2;                                                                                                                                                                   |
| P | Q8YPF1 | DR | potassium-transporting ATPase activity                                                                                                                                                                     |
| P | Q8YQ90 | DR | cobalt ion transmembrane transporter activity                                                                                                                                                              |
| P | Q8YSD5 | CC | One of the components of the high-affinity ATP-driven potassium transport (or KDP) system, which catalyzes the hydrolysis of ATP coupled with the exchange of hydrogen and potassium ions (By similarity). |
| P | Q8YSD5 | DE | Potassium-binding and translocating subunit B 2;                                                                                                                                                           |
| P | Q8YSD5 | DE | Potassium-translocating ATPase B chain 2;                                                                                                                                                                  |

|   |        |    |                                                                                                                                                                                           |
|---|--------|----|-------------------------------------------------------------------------------------------------------------------------------------------------------------------------------------------|
| P | Q8YSD5 | DE | Potassium-transporting ATPase B chain 2;                                                                                                                                                  |
| P | Q8YSD5 | DR | potassium-transporting ATPase activity                                                                                                                                                    |
| P | Q8YSD7 | CC | One of the components of the high-affinity ATP-driven potassium transport (or KDP) system, which catalyzes the hydrolysis of ATP coupled with the exchange of hydrogen and potassium ions |
| P | Q8YSD7 | DE | Potassium-binding and translocating subunit C 1;                                                                                                                                          |
| P | Q8YSD7 | DE | Potassium-translocating ATPase C chain 1;                                                                                                                                                 |
| P | Q8YSD7 | DE | Potassium-transporting ATPase C chain 1;                                                                                                                                                  |
| P | Q8YSD7 | DR | potassium-transporting ATPase activity                                                                                                                                                    |
| P | Q8YUI9 | DR | phosphonate transmembrane-transporting ATPase activity                                                                                                                                    |
| P | Q8YUV1 | DR | phosphonate transmembrane-transporting ATPase activity                                                                                                                                    |
| P | Q8YYE2 | CC | Part of the ABC transporter complex PstSACB involved in phosphate import                                                                                                                  |
| P | Q8YYE2 | DE | ABC phosphate transporter 2;                                                                                                                                                              |
| P | Q8YYE2 | DE | Phosphate import ATP-binding protein PstB 2;                                                                                                                                              |
| P | Q8YYE2 | DE | Phosphate-transporting ATPase 2;                                                                                                                                                          |
| P | Q8YYE2 | DR | inorganic phosphate transmembrane transporter activity                                                                                                                                    |
| P | Q8YYE2 | DR | phosphate transmembrane-transporting ATPase activity                                                                                                                                      |
| P | Q8YYE3 | CC | Part of the ABC transporter complex PstSACB involved in phosphate import                                                                                                                  |
| P | Q8YYE3 | DE | ABC phosphate transporter 1;                                                                                                                                                              |
| P | Q8YYE3 | DE | Phosphate import ATP-binding protein PstB 1;                                                                                                                                              |
| P | Q8YYE3 | DE | Phosphate-transporting ATPase 1;                                                                                                                                                          |
| P | Q8YYE3 | DR | phosphate transmembrane-transporting ATPase activity                                                                                                                                      |
| P | Q8Z0H0 | CC | Part of the ABC transporter complex CysAW 1F involved in sulfate/thiosulfate import                                                                                                       |
| P | Q8Z0H0 | DE | Sulfate-transporting ATPase;                                                                                                                                                              |
| P | Q8Z0H0 | DE | Sulfate/thiosulfate import ATP-binding protein CysA;                                                                                                                                      |
| P | Q8Z0H0 | DR | sulfate transmembrane-transporting ATPase activity                                                                                                                                        |
| P | Q8Z1U0 | CC | Part of the ABC transporter complex MalEFGK involved in maltose/maltodextrin import                                                                                                       |
| P | Q8Z1U0 | CC | Part of the ABC transporter complex MalEFGK involved in maltose/maltodextrin import                                                                                                       |
| P | Q8Z1U0 | DE | Maltose/maltodextrin import ATP-binding protein MalK;                                                                                                                                     |
| P | Q8Z1U0 | DE | Maltose/maltodextrin import ATP-binding protein MalK;                                                                                                                                     |
| P | Q8Z1U0 | DR | maltose-transporting ATPase activity                                                                                                                                                      |
| P | Q8Z1U2 | DE | Maltose transport system permease protein malF;                                                                                                                                           |
| P | Q8Z1U3 | DE | Maltose transport system permease protein malG;                                                                                                                                           |
| P | Q8Z1Y7 | CC | Transport system that facilitates potassium-efflux, possibly by potassium-proton antiport (By similarity).                                                                                |
| P | Q8Z1Y7 | DE | Glutathione-regulated potassium-efflux system protein kefB;                                                                                                                               |
| P | Q8Z1Y7 | DE | K <sup>+</sup> /H <sup>+</sup> antiporter;                                                                                                                                                |
| P | Q8Z1Y7 | DE | NEM-activable K <sup>+</sup> /H <sup>+</sup> antiporter;                                                                                                                                  |
| P | Q8Z1Y7 | DR | glutathione-regulated potassium exporter activity                                                                                                                                         |
| P | Q8Z245 | DR | glycerol-3-phosphate-transporting ATPase activity                                                                                                                                         |
| P | Q8Z2E3 | CC | Transports L-lactate across the membrane                                                                                                                                                  |
| P | Q8Z2E3 | DE | L-lactate permease;                                                                                                                                                                       |
| P | Q8Z2E3 | DR | lactate transmembrane transporter activity                                                                                                                                                |
| P | Q8Z2R2 | CC | Responsible for the low-affinity transport of potassium into the cell, with the probable concomitant uptake of protons (symport system) (By similarity).                                  |
| P | Q8Z2R2 | DE | Kup system potassium uptake protein;                                                                                                                                                      |
| P | Q8Z2R2 | DE | Low affinity potassium transport system protein kup;                                                                                                                                      |
| P | Q8Z2R2 | DR | potassium ion transmembrane transporter activity                                                                                                                                          |
| P | Q8Z2R4 | CC | Part of the ABC transporter complex RbsABCD involved in ribose import                                                                                                                     |
| P | Q8Z2R4 | DE | Ribose import ATP-binding protein RbsA;                                                                                                                                                   |
| P | Q8Z2V6 | CC | Uptake of L-rhamnose across the boundary membrane with the concomitant transport of protons into the cell (symport system) (By similarity).                                               |
| P | Q8Z2V6 | DE | L-rhamnose-H <sup>+</sup> transport protein;                                                                                                                                              |
| P | Q8Z2V6 | DE | L-rhamnose-proton symporter;                                                                                                                                                              |
| P | Q8Z3B4 | CC | Conducts the efflux of homoserine and homoserine lactone (By similarity).                                                                                                                 |
| P | Q8Z3B4 | DE | Homoserine/homoserine lactone efflux protein;                                                                                                                                             |
| P | Q8Z3L4 | CC | Involved in the import of serine and threonine into the cell, with the concomitant import of sodium (symport system) (By similarity).                                                     |
| P | Q8Z3L4 | DE | Na <sup>+</sup> /serine-threonine symporter;                                                                                                                                              |
| P | Q8Z3L4 | DR | sodium:dicarboxylate symporter activity                                                                                                                                                   |
| P | Q8Z3L4 | DR | sodium:dicarboxylate symporter activity                                                                                                                                                   |
| P | Q8Z3W2 | CC | Important to control the intracellular level of arginine and the correct balance between arginine and lysine (By similarity).                                                             |
| P | Q8Z4X5 | CC | H <sup>+</sup> -stimulated, highly selective, manganese uptake system (By similarity).                                                                                                    |
| P | Q8Z4X5 | DE | Manganese transport protein mntH;                                                                                                                                                         |



|   |        |    |                                                                                                                                                                                                            |
|---|--------|----|------------------------------------------------------------------------------------------------------------------------------------------------------------------------------------------------------------|
| P | Q8Z4X8 | DR | voltage-gated chloride channel activity                                                                                                                                                                    |
| P | Q8Z591 | CC | This system is involved in fructose transport (By similarity).                                                                                                                                             |
| P | Q8Z591 | DE | Fructose-specific phosphotransferase enzyme IIA component;                                                                                                                                                 |
| P | Q8Z591 | DE | PTS system fructose-specific EIIA component;                                                                                                                                                               |
| P | Q8Z5N3 | DR | cobalt ion transmembrane transporter activity                                                                                                                                                              |
| P | Q8Z5W6 | CC | Part of the ABC transporter complex ZnuABC involved in zinc import                                                                                                                                         |
| P | Q8Z5W6 | DE | Zinc import ATP-binding protein ZnuC;                                                                                                                                                                      |
| P | Q8Z5W6 | DR | zinc transporting ATPase activity                                                                                                                                                                          |
| P | Q8Z684 | CC | Na <sup>+</sup> /H <sup>+</sup> antiporter that extrudes sodium in exchange for external protons (By similarity)                                                                                           |
| P | Q8Z684 | DE | Na <sup>+</sup> /H <sup>+</sup> antiporter nhaB;                                                                                                                                                           |
| P | Q8Z684 | DE | Sodium/proton antiporter nhaB;                                                                                                                                                                             |
| P | Q8Z684 | DR | sodium:hydrogen antiporter activity                                                                                                                                                                        |
| P | Q8Z6I5 | CC | Part of the ABC transporter complex BtuCDF involved in vitamin B12 import                                                                                                                                  |
| P | Q8Z6I5 | DE | Vitamin B12 import system permease protein BtuC;                                                                                                                                                           |
| P | Q8Z6Y0 | DE | Voltage-gated ClC-type chloride channel ClcB;                                                                                                                                                              |
| P | Q8Z6Y0 | DR | voltage-gated chloride channel activity                                                                                                                                                                    |
| P | Q8Z784 | CC | Mediates efflux of zinc ions (By similarity).                                                                                                                                                              |
| P | Q8Z784 | DE | Zinc transport protein ZntB;                                                                                                                                                                               |
| P | Q8Z7H7 | CC | Part of the ABC transporter complex PotABCD involved in spermidine/putrescine import                                                                                                                       |
| P | Q8Z7H7 | CC | Part of the ABC transporter complex PotABCD involved in spermidine/putrescine import                                                                                                                       |
| P | Q8Z7H7 | DE | Spermidine/putrescine import ATP-binding protein PotA;                                                                                                                                                     |
| P | Q8Z7H7 | DE | Spermidine/putrescine import ATP-binding protein PotA;                                                                                                                                                     |
| P | Q8Z8A4 | CC | Part of the ABC transporter complex ModABC involved in molybdenum import                                                                                                                                   |
| P | Q8Z8A4 | DE | Molybdenum import ATP-binding protein ModC;                                                                                                                                                                |
| P | Q8Z8A4 | DR | molybdenum ion transmembrane transporter activity                                                                                                                                                          |
| P | Q8Z8B6 | CC | Involved in zinc efflux across the cytoplasmic membrane, thus reducing zinc accumulation in the cytoplasm and rendering bacteria more resistant to zinc                                                    |
| P | Q8Z8B6 | CC | It may contribute to zinc homeostasis at low concentrations of zinc (By similarity)                                                                                                                        |
| P | Q8Z8B6 | DE | Zinc transporter zitB;                                                                                                                                                                                     |
| P | Q8Z8E4 | CC | One of the components of the high-affinity ATP-driven potassium transport (or KDP) system, which catalyzes the hydrolysis of ATP coupled with the exchange of hydrogen and potassium ions (By similarity). |
| P | Q8Z8E4 | DE | Potassium-binding and translocating subunit A;                                                                                                                                                             |
| P | Q8Z8E4 | DE | Potassium-translocating ATPase A chain;                                                                                                                                                                    |
| P | Q8Z8E4 | DE | Potassium-transporting ATPase A chain;                                                                                                                                                                     |
| P | Q8Z8E4 | DR | potassium-transporting ATPase activity                                                                                                                                                                     |
| P | Q8Z8E5 | CC | One of the components of the high-affinity ATP-driven potassium transport (or KDP) system, which catalyzes the hydrolysis of ATP coupled with the exchange of hydrogen and potassium ions (By similarity). |
| P | Q8Z8E5 | DE | Potassium-binding and translocating subunit B;                                                                                                                                                             |
| P | Q8Z8E5 | DE | Potassium-translocating ATPase B chain;                                                                                                                                                                    |
| P | Q8Z8E5 | DE | Putative potassium-transporting ATPase B chain;                                                                                                                                                            |
| P | Q8Z8E5 | DR | potassium-transporting ATPase activity                                                                                                                                                                     |
| P | Q8Z8E6 | CC | One of the components of the high-affinity ATP-driven potassium transport (or KDP) system, which catalyzes the hydrolysis of ATP coupled with the exchange of hydrogen and potassium ions                  |
| P | Q8Z8E6 | DE | Potassium-binding and translocating subunit C;                                                                                                                                                             |
| P | Q8Z8E6 | DE | Potassium-translocating ATPase C chain;                                                                                                                                                                    |
| P | Q8Z8E6 | DE | Potassium-transporting ATPase C chain;                                                                                                                                                                     |
| P | Q8Z8E6 | DR | potassium-transporting ATPase activity                                                                                                                                                                     |
| P | Q8Z8R5 | CC | Part of the ABC transporter complex MetNIQ involved in methionine import                                                                                                                                   |
| P | Q8Z8R5 | DE | Methionine import ATP-binding protein MetN 2;                                                                                                                                                              |
| P | Q8Z8S4 | CC | Involved in copper export (By similarity).                                                                                                                                                                 |
| P | Q8Z8S4 | DE | Copper-exporting P-type ATPase A;                                                                                                                                                                          |
| P | Q8Z8S4 | DR | copper-exporting ATPase activity                                                                                                                                                                           |
| P | Q8Z8W7 | CC | Probably part of the phnSTUV complex (TC 3.A.1.11.5) involved in 2-aminoethylphosphonate import (By similarity).                                                                                           |
| P | Q8Z8W7 | DE | Putative 2-aminoethylphosphonate-binding periplasmic protein;                                                                                                                                              |
| P | Q8Z8W8 | CC | Probably part of the PhnSTUV complex (TC 3.A.1.11.5) involved in 2-aminoethylphosphonate import                                                                                                            |
| P | Q8Z8W8 | DE | Putative 2-aminoethylphosphonate import ATP-binding protein PhnT;                                                                                                                                          |
| P | Q8Z8W9 | CC | Probably part of the phnSTUV complex (TC 3.A.1.11.5) involved in 2-aminoethylphosphonate import                                                                                                            |
| P | Q8Z8W9 | DE | Putative 2-aminoethylphosphonate transport system permease protein phnU;                                                                                                                                   |

|   |        |    |                                                                                                                                                                                                            |
|---|--------|----|------------------------------------------------------------------------------------------------------------------------------------------------------------------------------------------------------------|
| P | Q8Z8X0 | CC | Probably part of the phnSTUV complex (TC 3.A.1.11.5) involved in 2-aminoethylphosphonate import                                                                                                            |
| P | Q8Z8X0 | DE | Putative 2-aminoethylphosphonate transport system permease protein phnV;                                                                                                                                   |
| P | Q8Z990 | CC | Part of the ABC transporter complex MetNIQ involved in methionine import                                                                                                                                   |
| P | Q8Z990 | DE | Methionine import ATP-binding protein MetN 1;                                                                                                                                                              |
| P | Q8Z990 | DR | D-methionine transmembrane transporter activity                                                                                                                                                            |
| P | Q8Z992 | CC | This protein is a component of a D-methionine permease, a binding protein-dependent, ATP-driven transport system (By similarity).                                                                          |
| P | Q8Z992 | DE | D-methionine-binding lipoprotein metQ;                                                                                                                                                                     |
| P | Q8Z9B2 | CC | Binds vitamin B12 and delivers it to the periplasmic surface of BtuC (By similarity)                                                                                                                       |
| P | Q8Z9B2 | CC | Part of the ABC transporter complex BtuCDF involved in vitamin B12 import                                                                                                                                  |
| P | Q8Z9B3 | CC | Functions as antiport system and exchanges two chloride ions for 1 proton                                                                                                                                  |
| P | Q8Z9B3 | CC | Proton-coupled chloride transporter                                                                                                                                                                        |
| P | Q8Z9B3 | DR | voltage-gated chloride channel activity                                                                                                                                                                    |
| P | Q8Z9I6 | CC | Part of the ABC transporter complex ThiBPQ involved in thiamine import                                                                                                                                     |
| P | Q8Z9I6 | DE | Thiamine import ATP-binding protein ThiQ;                                                                                                                                                                  |
| P | Q8Z9K0 | CC | Transport system that facilitates potassium-efflux, possibly by potassium-proton antiport (By similarity).                                                                                                 |
| P | Q8Z9K0 | DE | Glutathione-regulated potassium-efflux system protein kefC;                                                                                                                                                |
| P | Q8Z9K0 | DE | K <sup>+</sup> /H <sup>+</sup> antiporter;                                                                                                                                                                 |
| P | Q8Z9N5 | CC | Na <sup>+</sup> /H <sup>+</sup> antiporter that extrudes sodium in exchange for external protons (By similarity)                                                                                           |
| P | Q8Z9N5 | DE | Na <sup>+</sup> /H <sup>+</sup> antiporter nhaA;                                                                                                                                                           |
| P | Q8Z9N5 | DE | Sodium/proton antiporter nhaA;                                                                                                                                                                             |
| P | Q8Z9T1 | CC | Part of the ABC transporter complex PstSACB involved in phosphate import                                                                                                                                   |
| P | Q8Z9T1 | DE | ABC phosphate transporter 2;                                                                                                                                                                               |
| P | Q8Z9T1 | DE | Phosphate import ATP-binding protein PstB 2;                                                                                                                                                               |
| P | Q8Z9T1 | DE | Phosphate-transporting ATPase 2;                                                                                                                                                                           |
| P | Q8Z9T1 | DR | inorganic phosphate transmembrane transporter activity                                                                                                                                                     |
| P | Q8Z9T1 | DR | phosphate transmembrane-transporting ATPase activity                                                                                                                                                       |
| P | Q8ZA28 | DR | sodium:dicarboxylate symporter activity                                                                                                                                                                    |
| P | Q8ZAG5 | CC | Mediates influx of magnesium ions (By similarity).                                                                                                                                                         |
| P | Q8ZAG5 | DE | Magnesium transport protein CorA;                                                                                                                                                                          |
| P | Q8ZAG5 | DR | cobalt ion transmembrane transporter activity                                                                                                                                                              |
| P | Q8ZAG5 | DR | magnesium ion transmembrane transporter activity                                                                                                                                                           |
| P | Q8ZAS8 | CC | Part of the ABC transporter complex MalEFGK involved in maltose/maltodextrin import                                                                                                                        |
| P | Q8ZAS8 | CC | Part of the ABC transporter complex MalEFGK involved in maltose/maltodextrin import                                                                                                                        |
| P | Q8ZAS8 | DE | Maltose/maltodextrin import ATP-binding protein MalK;                                                                                                                                                      |
| P | Q8ZAS8 | DE | Maltose/maltodextrin import ATP-binding protein MalK;                                                                                                                                                      |
| P | Q8ZAS8 | DR | maltose-transporting ATPase activity                                                                                                                                                                       |
| P | Q8ZBM0 | CC | Functions as antiport system and exchanges two chloride ions for 1 proton                                                                                                                                  |
| P | Q8ZBM0 | CC | Proton-coupled chloride transporter                                                                                                                                                                        |
| P | Q8ZBM0 | DR | voltage-gated chloride channel activity                                                                                                                                                                    |
| P | Q8ZBM3 | CC | Binds vitamin B12 and delivers it to the periplasmic surface of BtuC (By similarity)                                                                                                                       |
| P | Q8ZBM3 | CC | Part of the ABC transporter complex BtuCDF involved in vitamin B12 import                                                                                                                                  |
| P | Q8ZBM3 | DR | iron ion transmembrane transporter activity                                                                                                                                                                |
| P | Q8ZCA7 | CC | Involved in copper export (By similarity).                                                                                                                                                                 |
| P | Q8ZCA7 | DE | Copper-exporting P-type ATPase A;                                                                                                                                                                          |
| P | Q8ZCA7 | DR | copper-exporting ATPase activity                                                                                                                                                                           |
| P | Q8ZCK2 | CC | H <sup>+</sup> -stimulated, highly selective, manganese uptake system (By similarity).                                                                                                                     |
| P | Q8ZCK2 | DE | Probable manganese transport protein mntH;                                                                                                                                                                 |
| P | Q8ZCX5 | CC | Part of the ABC transporter complex PstSACB involved in phosphate import                                                                                                                                   |
| P | Q8ZCX5 | DE | ABC phosphate transporter 1;                                                                                                                                                                               |
| P | Q8ZCX5 | DE | Phosphate import ATP-binding protein PstB 1;                                                                                                                                                               |
| P | Q8ZCX5 | DE | Phosphate-specific transport component 1;                                                                                                                                                                  |
| P | Q8ZCX5 | DE | Phosphate-transporting ATPase 1;                                                                                                                                                                           |
| P | Q8ZCX5 | DR | inorganic phosphate transmembrane transporter activity                                                                                                                                                     |
| P | Q8ZCX5 | DR | phosphate transmembrane-transporting ATPase activity                                                                                                                                                       |
| P | Q8ZD58 | CC | Part of the ABC transporter complex CcmAB involved in the biogenesis of c-type cytochromes; once thought to export heme, this seems not to be the case, but its exact role is uncertain                    |
| P | Q8ZD58 | DE | Heme exporter protein A;                                                                                                                                                                                   |
| P | Q8ZD58 | DR | heme-transporting ATPase activity                                                                                                                                                                          |
| P | Q8ZD96 | CC | One of the components of the high-affinity ATP-driven potassium transport (or KDP) system, which catalyzes the hydrolysis of ATP coupled with the exchange of hydrogen and potassium ions (By similarity). |

|   |        |    |                                                                                                                                                                                                            |
|---|--------|----|------------------------------------------------------------------------------------------------------------------------------------------------------------------------------------------------------------|
| P | Q8ZD96 | DE | Potassium-binding and translocating subunit A;                                                                                                                                                             |
| P | Q8ZD96 | DE | Potassium-translocating ATPase A chain;                                                                                                                                                                    |
| P | Q8ZD96 | DE | Potassium-transporting ATPase A chain;                                                                                                                                                                     |
| P | Q8ZD96 | DR | potassium-transporting ATPase activity                                                                                                                                                                     |
| P | Q8ZD97 | CC | One of the components of the high-affinity ATP-driven potassium transport (or KDP) system, which catalyzes the hydrolysis of ATP coupled with the exchange of hydrogen and potassium ions (By similarity). |
| P | Q8ZD97 | DE | Potassium-binding and translocating subunit B;                                                                                                                                                             |
| P | Q8ZD97 | DE | Potassium-translocating ATPase B chain;                                                                                                                                                                    |
| P | Q8ZD97 | DE | Potassium-transporting ATPase B chain;                                                                                                                                                                     |
| P | Q8ZD97 | DR | potassium-transporting ATPase activity                                                                                                                                                                     |
| P | Q8ZD98 | CC | One of the components of the high-affinity ATP-driven potassium transport (or KDP) system, which catalyzes the hydrolysis of ATP coupled with the exchange of hydrogen and potassium ions                  |
| P | Q8ZD98 | DE | Potassium-binding and translocating subunit C;                                                                                                                                                             |
| P | Q8ZD98 | DE | Potassium-translocating ATPase C chain;                                                                                                                                                                    |
| P | Q8ZD98 | DE | Potassium-transporting ATPase C chain;                                                                                                                                                                     |
| P | Q8ZD98 | DR | potassium-transporting ATPase activity                                                                                                                                                                     |
| P | Q8ZDX4 | CC | Part of the ABC transporter complex BtuCDF involved in vitamin B12 import                                                                                                                                  |
| P | Q8ZDX4 | DE | Vitamin B12 import system permease protein BtuC;                                                                                                                                                           |
| P | Q8ZDX6 | CC | Part of the ABC transporter complex BtuCDF involved in vitamin B12 import                                                                                                                                  |
| P | Q8ZDX6 | DE | Vitamin B12 import ATP-binding protein BtuD;                                                                                                                                                               |
| P | Q8ZDX6 | DE | Vitamin B12-transporting ATPase;                                                                                                                                                                           |
| P | Q8ZEU2 | CC | Involved in the high-affinity zinc uptake transport system (By similarity).                                                                                                                                |
| P | Q8ZEU2 | DE | High-affinity zinc uptake system protein znuA;                                                                                                                                                             |
| P | Q8ZFR4 | DE | Lipoprotein-releasing system ATP-binding protein LolD;                                                                                                                                                     |
| P | Q8ZFR4 | DR | lipoprotein transporter activity                                                                                                                                                                           |
| P | Q8ZGS9 | CC | Exchanges extracellular arginine for its intracellular decarboxylation product agmatine (Agm) thereby expelling intracellular protons (By similarity).                                                     |
| P | Q8ZGS9 | DE | Arginine/agmatine antiporter;                                                                                                                                                                              |
| P | Q8ZGU5 | DR | phosphonate transmembrane-transporting ATPase activity                                                                                                                                                     |
| P | Q8ZGX6 | CC | Part of the ABC transporter complex ModABC involved in molybdenum import                                                                                                                                   |
| P | Q8ZGX6 | DE | Molybdenum import ATP-binding protein ModC;                                                                                                                                                                |
| P | Q8ZGX6 | DR | molybdate transmembrane-transporting ATPase activity                                                                                                                                                       |
| P | Q8ZGX6 | DR | molybdenum ion transmembrane transporter activity                                                                                                                                                          |
| P | Q8ZGY6 | CC | Involved in zinc efflux across the cytoplasmic membrane, thus reducing zinc accumulation in the cytoplasm and rendering bacteria more resistant to zinc                                                    |
| P | Q8ZGY6 | CC | it may contribute to zinc homeostasis at low concentrations of zinc (By similarity)                                                                                                                        |
| P | Q8ZGY6 | DE | Zinc transporter zitB;                                                                                                                                                                                     |
| P | Q8ZH38 | CC | Part of the ABC transporter complex MetNIQ involved in methionine import                                                                                                                                   |
| P | Q8ZH38 | DE | Methionine import ATP-binding protein MetN 1;                                                                                                                                                              |
| P | Q8ZH38 | DR | D-methionine transmembrane transporter activity                                                                                                                                                            |
| P | Q8ZH39 | CC | Part of the binding-protein-dependent transport system for D-methionine and the toxic methionine analog alpha-methyl- methionine                                                                           |
| P | Q8ZH39 | DE | D-methionine transport system permease protein metI;                                                                                                                                                       |
| P | Q8ZH40 | CC | This protein is a component of a D-methionine permease, a binding protein-dependent, ATP-driven transport system (By similarity).                                                                          |
| P | Q8ZH40 | DE | D-methionine-binding lipoprotein metQ;                                                                                                                                                                     |
| P | Q8ZHH6 | CC | Important to control the intracellular level of arginine and the correct balance between arginine and lysine (By similarity).                                                                              |
| P | Q8ZIZ8 | CC | Uptake of L-rhamnose across the boundary membrane with the concomitant transport of protons into the cell (symport system) (By similarity).                                                                |
| P | Q8ZIZ8 | DE | L-rhamnose-H <sup>+</sup> transport protein;                                                                                                                                                               |
| P | Q8ZIZ8 | DE | L-rhamnose-proton symporter;                                                                                                                                                                               |
| P | Q8ZJC4 | CC | Transport system that facilitates potassium-efflux, possibly by potassium-proton antiport (By similarity).                                                                                                 |
| P | Q8ZJC4 | DE | Glutathione-regulated potassium-efflux system protein kefB;                                                                                                                                                |
| P | Q8ZJC4 | DE | K <sup>+</sup> /H <sup>+</sup> antiporter;                                                                                                                                                                 |
| P | Q8ZJC4 | DE | NEM-activable K <sup>+</sup> /H <sup>+</sup> antiporter;                                                                                                                                                   |
| P | Q8ZJC4 | DR | glutathione-regulated potassium exporter activity                                                                                                                                                          |
| P | Q8ZJD0 | CC | Part of the ABC transporter complex TauABC involved in taurine import                                                                                                                                      |
| P | Q8ZJD0 | DE | Taurine import ATP-binding protein TauB;                                                                                                                                                                   |
| P | Q8ZJD0 | DR | taurine-transporting ATPase activity                                                                                                                                                                       |
| P | Q8ZJT0 | CC | Responsible for the low-affinity transport of potassium into the cell, with the probable concomitant uptake of protons (symport system) (By similarity).                                                   |

|   |        |    |                                                                                                                                                                                                                                  |
|---|--------|----|----------------------------------------------------------------------------------------------------------------------------------------------------------------------------------------------------------------------------------|
| P | Q8ZJT0 | DE | Kup system potassium uptake protein;                                                                                                                                                                                             |
| P | Q8ZJT0 | DE | Low affinity potassium transport system protein kup;                                                                                                                                                                             |
| P | Q8ZJT0 | DR | potassium ion transmembrane transporter activity                                                                                                                                                                                 |
| P | Q8ZKV9 | CC | Part of the ABC transporter complex RbsABCD involved in ribose import                                                                                                                                                            |
| P | Q8ZKV9 | DE | Ribose import ATP-binding protein RbsA;                                                                                                                                                                                          |
| P | Q8ZKW1 | CC | Responsible for the low-affinity transport of potassium into the cell, with the probable concomitant uptake of protons (symport system) (By similarity).                                                                         |
| P | Q8ZKW1 | DE | Kup system potassium uptake protein;                                                                                                                                                                                             |
| P | Q8ZKW1 | DE | Low affinity potassium transport system protein kup;                                                                                                                                                                             |
| P | Q8ZKW1 | DR | potassium ion transmembrane transporter activity                                                                                                                                                                                 |
| P | Q8ZKZ9 | CC | Part of the ABC transporter complex CcmAB involved in the biogenesis of c-type cytochromes; once thought to export heme, this seems not to be the case, but its exact role is uncertain                                          |
| P | Q8ZKZ9 | DE | Heme exporter protein A 1;                                                                                                                                                                                                       |
| P | Q8ZKZ9 | DR | heme-transporting ATPase activity                                                                                                                                                                                                |
| P | Q8ZL63 | CC | Transports L-lactate across the membrane                                                                                                                                                                                         |
| P | Q8ZL63 | DE | L-lactate permease;                                                                                                                                                                                                              |
| P | Q8ZL63 | DR | lactate transmembrane transporter activity                                                                                                                                                                                       |
| P | Q8ZLF4 | DR | glycerol-3-phosphate-transporting ATPase activity                                                                                                                                                                                |
| P | Q8ZLL3 | CC | Transport system that facilitates potassium-efflux, possibly by potassium-proton antiport (By similarity).                                                                                                                       |
| P | Q8ZLL3 | DE | Glutathione-regulated potassium-efflux system protein kefB;                                                                                                                                                                      |
| P | Q8ZLL3 | DE | K <sup>+</sup> /H <sup>+</sup> antiporter;                                                                                                                                                                                       |
| P | Q8ZLL3 | DE | NEM-activable K <sup>+</sup> /H <sup>+</sup> antiporter;                                                                                                                                                                         |
| P | Q8ZLL3 | DR | glutathione-regulated potassium exporter activity                                                                                                                                                                                |
| P | Q8ZLW1 | CC | Involved in the import of threonine and serine into the cell, with the concomitant import of a proton (symport system) (By similarity).                                                                                          |
| P | Q8ZLW1 | DE | Threonine/serine transporter TdcC;                                                                                                                                                                                               |
| P | Q8ZLX1 | CC | Involved in the import of serine and threonine into the cell, with the concomitant import of sodium (symport system) (By similarity).                                                                                            |
| P | Q8ZLX1 | DE | Na <sup>+</sup> /serine-threonine symporter;                                                                                                                                                                                     |
| P | Q8ZLX1 | DR | sodium:dicarboxylate symporter activity                                                                                                                                                                                          |
| P | Q8ZLX1 | DR | sodium:dicarboxylate symporter activity                                                                                                                                                                                          |
| P | Q8ZM68 | CC | Important to control the intracellular level of arginine and the correct balance between arginine and lysine (By similarity).<br>Putative ABC-type oligopeptide/oligopeptide/nucleic acid transport systems, permease component. |
| P | Q8ZNJ9 | DE | Part of the ABC transporter complex ZnuABC involved in zinc import                                                                                                                                                               |
| P | Q8ZNV7 | CC | Zinc import ATP-binding protein ZnuC;                                                                                                                                                                                            |
| P | Q8ZNV7 | DE | zinc transporting ATPase activity                                                                                                                                                                                                |
| P | Q8ZNV7 | DR | Na <sup>+</sup> /H <sup>+</sup> antiporter that extrudes sodium in exchange for external protons (By similarity).                                                                                                                |
| P | Q8ZP14 | CC | Na <sup>+</sup> /H <sup>+</sup> antiporter nhaB;                                                                                                                                                                                 |
| P | Q8ZP14 | DE | Sodium/proton antiporter nhaB;                                                                                                                                                                                                   |
| P | Q8ZP14 | DR | sodium:hydrogen antiporter activity                                                                                                                                                                                              |
| P | Q8ZPK5 | DE | Voltage-gated ClC-type chloride channel ClcB;                                                                                                                                                                                    |
| P | Q8ZPK5 | DR | voltage-gated chloride channel activity                                                                                                                                                                                          |
| P | Q8ZPS8 | CC | Part of the ABC transporter complex BtuCDF involved in vitamin B12 import                                                                                                                                                        |
| P | Q8ZPS8 | DE | Vitamin B12 import system permease protein BtuC;                                                                                                                                                                                 |
| P | Q8ZQ35 | DE | Putative sodium/glucose cotransporter;                                                                                                                                                                                           |
| P | Q8ZQR6 | CC | Part of the ABC transporter complex ModABC involved in molybdenum import                                                                                                                                                         |
| P | Q8ZQR6 | DE | Molybdenum import ATP-binding protein ModC;                                                                                                                                                                                      |
| P | Q8ZQR6 | DR | molybdenum ion transmembrane transporter activity                                                                                                                                                                                |
| P | Q8ZQW1 | CC | One of the components of the high-affinity ATP-driven potassium transport (or KDP) system, which catalyzes the hydrolysis of ATP coupled with the exchange of hydrogen and potassium ions (By similarity).                       |
| P | Q8ZQW1 | DE | Potassium-binding and translocating subunit A;                                                                                                                                                                                   |
| P | Q8ZQW1 | DE | Potassium-translocating ATPase A chain;                                                                                                                                                                                          |
| P | Q8ZQW1 | DE | Potassium-transporting ATPase A chain;                                                                                                                                                                                           |
| P | Q8ZQW1 | DR | potassium-transporting ATPase activity                                                                                                                                                                                           |
| P | Q8ZQW2 | CC | One of the components of the high-affinity ATP-driven potassium transport (or KDP) system, which catalyzes the hydrolysis of ATP coupled with the exchange of hydrogen and potassium ions (By similarity).                       |
| P | Q8ZQW2 | DE | Potassium-binding and translocating subunit B;                                                                                                                                                                                   |
| P | Q8ZQW2 | DE | Potassium-translocating ATPase B chain;                                                                                                                                                                                          |
| P | Q8ZQW2 | DE | Potassium-transporting ATPase B chain;                                                                                                                                                                                           |
| P | Q8ZQW2 | DR | potassium-transporting ATPase activity                                                                                                                                                                                           |

|   |        |    |                                                                                                                                                                                                                                                                |
|---|--------|----|----------------------------------------------------------------------------------------------------------------------------------------------------------------------------------------------------------------------------------------------------------------|
| P | Q8ZQW3 | CC | One of the components of the high-affinity ATP-driven potassium transport (or KDP) system, which catalyzes the hydrolysis of ATP coupled with the exchange of hydrogen and potassium ions                                                                      |
| P | Q8ZQW3 | DE | Potassium-binding and translocating subunit C;                                                                                                                                                                                                                 |
| P | Q8ZQW3 | DE | Potassium-translocating ATPase C chain;                                                                                                                                                                                                                        |
| P | Q8ZQW3 | DE | Potassium-transporting ATPase C chain;                                                                                                                                                                                                                         |
| P | Q8ZQW3 | DR | potassium-transporting ATPase activity                                                                                                                                                                                                                         |
| P | Q8ZR95 | CC | Essential for copper tolerance under both aerobic and anaerobic conditions.                                                                                                                                                                                    |
| P | Q8ZR95 | CC | Involved in copper export (By similarity)                                                                                                                                                                                                                      |
| P | Q8ZR95 | DE | Copper-exporting P-type ATPase A;                                                                                                                                                                                                                              |
| P | Q8ZR95 | DR | copper-exporting ATPase activity                                                                                                                                                                                                                               |
| P | Q8ZRG7 | DR | copper-exporting ATPase activity                                                                                                                                                                                                                               |
| P | Q8ZRP7 | CC | Binds vitamin B12 and delivers it to the periplasmic surface of BtuC (By similarity)                                                                                                                                                                           |
| P | Q8ZRP7 | CC | Part of the ABC transporter complex BtuCDF involved in vitamin B12 import                                                                                                                                                                                      |
| P | Q8ZRP7 | DR | iron ion transmembrane transporter activity                                                                                                                                                                                                                    |
| P | Q8ZRP8 | CC | Functions as antiport system and exchanges two chloride ions for 1 proton                                                                                                                                                                                      |
| P | Q8ZRP8 | CC | Proton-coupled chloride transporter                                                                                                                                                                                                                            |
| P | Q8ZRP8 | DR | voltage-gated chloride channel activity                                                                                                                                                                                                                        |
| P | Q8ZRV2 | CC | Part of the ABC transporter complex ThiBPQ involved in thiamine import                                                                                                                                                                                         |
| P | Q8ZRV2 | DE | Thiamine import ATP-binding protein ThiQ;                                                                                                                                                                                                                      |
| P | Q8ZRW2 | CC | Transport system that facilitates potassium-efflux, possibly by potassium-proton antiport (By similarity).                                                                                                                                                     |
| P | Q8ZRW2 | DE | Glutathione-regulated potassium-efflux system protein kefC;                                                                                                                                                                                                    |
| P | Q8ZRW2 | DE | K <sup>+</sup> /H <sup>+</sup> antiporter;                                                                                                                                                                                                                     |
| P | Q8ZRZ3 | CC | Na <sup>+</sup> /H <sup>+</sup> antiporter that extrudes sodium in exchange for external protons (By similarity)                                                                                                                                               |
| P | Q8ZRZ3 | DE | Na <sup>+</sup> /H <sup>+</sup> antiporter nhaA;                                                                                                                                                                                                               |
| P | Q8ZRZ3 | DE | Sodium/proton antiporter nhaA;                                                                                                                                                                                                                                 |
| P | Q8ZSB0 | CC | H <sup>+</sup> -stimulated, highly selective, manganese uptake system (By similarity).                                                                                                                                                                         |
| P | Q8ZSB0 | DE | Probable manganese transport protein mnth;                                                                                                                                                                                                                     |
| P | Q8ZUJ0 | DR | copper-exporting ATPase activity                                                                                                                                                                                                                               |
| P | Q8ZX91 | CC | Part of the ABC transporter complex PstSACB involved in phosphate import                                                                                                                                                                                       |
| P | Q8ZX91 | DE | ABC phosphate transporter;                                                                                                                                                                                                                                     |
| P | Q8ZX91 | DE | Phosphate import ATP-binding protein PstB;                                                                                                                                                                                                                     |
| P | Q8ZX91 | DE | Phosphate-transporting ATPase;                                                                                                                                                                                                                                 |
| P | Q8ZX91 | DR | phosphate transmembrane-transporting ATPase activity                                                                                                                                                                                                           |
| P | Q91V14 | CC | Mediates electroneutral potassium-chloride cotransport in mature neurons                                                                                                                                                                                       |
| P | Q91V14 | DE | Electroneutral potassium-chloride cotransporter 2;                                                                                                                                                                                                             |
| P | Q91V14 | DR | potassium:chloride symporter activity                                                                                                                                                                                                                          |
| P | Q91V14 | DR | potassium:chloride symporter activity                                                                                                                                                                                                                          |
| P | Q91V24 | CC | Binds APOA1 and may function in apolipoprotein-mediated phospholipid efflux from cells                                                                                                                                                                         |
| P | Q91V24 | CC | May also mediate cholesterol efflux                                                                                                                                                                                                                            |
| P | Q91V24 | DR | phospholipid transporter activity                                                                                                                                                                                                                              |
| P | Q91W10 | DE | Zinc transporter ZIP8;                                                                                                                                                                                                                                         |
| P | Q91W98 | CC | Proton oligopeptide cotransporter                                                                                                                                                                                                                              |
| P | Q91W98 | CC | Transports free histidine and certain di- and tripeptides (By similarity).                                                                                                                                                                                     |
| P | Q91W98 | DE | Peptide/histidine transporter 1;                                                                                                                                                                                                                               |
| P | Q91WN3 | DE | Sodium-independent aspartate/glutamate transporter 1;                                                                                                                                                                                                          |
| P | Q91WN3 | DE | Sodium-independent aspartate/glutamate transporter 1;                                                                                                                                                                                                          |
| P | Q91Y63 | CC | High-affinity sodium-dicarboxylate cotransporter that accepts a range of substrates with 4-5 carbon atoms                                                                                                                                                      |
| P | Q91Y63 | CC | The stoichiometry is probably 3 Na <sup>+</sup> for 1 divalent succinate.                                                                                                                                                                                      |
| P | Q91Y63 | DE | Na <sup>+</sup> /dicarboxylate cotransporter 3;                                                                                                                                                                                                                |
| P | Q91Y63 | DE | Na <sup>+</sup> /dicarboxylate cotransporter 3;                                                                                                                                                                                                                |
| P | Q91Y63 | DE | Sodium-dependent high-affinity dicarboxylate transporter 2;                                                                                                                                                                                                    |
| P | Q91Y63 | DE | Sodium-dependent high-affinity dicarboxylate transporter 2;                                                                                                                                                                                                    |
| P | Q91Y63 | DR | high affinity sodium:dicarboxylate symporter activity                                                                                                                                                                                                          |
| P | Q91Y63 | DR | high affinity sodium:dicarboxylate symporter activity                                                                                                                                                                                                          |
| P | Q921R7 | DR | sugar:hydrogen symporter activity                                                                                                                                                                                                                              |
| P | Q92253 | CC | Probable glucose transporter                                                                                                                                                                                                                                   |
| P | Q92253 | DE | Probable glucose transporter rco-3;                                                                                                                                                                                                                            |
| P | Q92317 | CC | Efficient substrate transport in mammalian kidney is provided by the concerted action of a low affinity high capacity and a high affinity low capacity Na <sup>+</sup> /glucose cotransporter arranged in series along kidney proximal tubules (By similarity) |

|   |        |    |                                                                                                                                                                                                                                                                |
|---|--------|----|----------------------------------------------------------------------------------------------------------------------------------------------------------------------------------------------------------------------------------------------------------------|
| P | Q923I7 | CC | Efficient substrate transport in mammalian kidney is provided by the concerted action of a low affinity high capacity and a high affinity low capacity Na <sup>+</sup> /glucose cotransporter arranged in series along kidney proximal tubules (By similarity) |
| P | Q923I7 | DE | Low affinity sodium-glucose cotransporter;                                                                                                                                                                                                                     |
| P | Q923I7 | DE | Na <sup>+</sup> /glucose cotransporter 2;                                                                                                                                                                                                                      |
| P | Q923I7 | DE | Na <sup>+</sup> /glucose cotransporter 2;                                                                                                                                                                                                                      |
| P | Q923I7 | DE | Sodium/glucose cotransporter 2;                                                                                                                                                                                                                                |
| P | Q923I7 | DE | Sodium/glucose cotransporter 2;                                                                                                                                                                                                                                |
| P | Q923J1 | CC | Divalent cation channel permeable to calcium and magnesium                                                                                                                                                                                                     |
| P | Q923J1 | CC | Has a central role in magnesium ion homeostasis and in the regulation of anoxic neuronal cell death                                                                                                                                                            |
| P | Q92482 | CC | It may play an important role in gastrointestinal tract water transport and in glycerol metabolism (By similarity).                                                                                                                                            |
| P | Q92482 | CC | Provides kidney medullary collecting duct with high permeability to water, thereby permitting water to move in the direction of an osmotic gradient                                                                                                            |
| P | Q92482 | CC | Water channel required to promote glycerol permeability and water transport across cell membranes                                                                                                                                                              |
| P | Q92482 | DR | water channel activity                                                                                                                                                                                                                                         |
| P | Q92504 | DE | Zinc transporter SLC39A7;                                                                                                                                                                                                                                      |
| P | Q92504 | DR | zinc ion transmembrane transporter activity                                                                                                                                                                                                                    |
| P | Q92581 | CC | Electroneutral exchange of protons for Na <sup>+</sup> and K <sup>+</sup> across the early and recycling endosome membranes                                                                                                                                    |
| P | Q92581 | DE | Na <sup>+</sup> /H <sup>+</sup> exchanger 6;                                                                                                                                                                                                                   |
| P | Q92581 | DE | Sodium/hydrogen exchanger 6;                                                                                                                                                                                                                                   |
| P | Q92581 | DR | sodium:hydrogen antiporter activity                                                                                                                                                                                                                            |
| P | Q925H0 | CC | Cation channel with high affinity for sodium, which is gated by extracellular protons and inhibited by the diuretic amiloride                                                                                                                                  |
| P | Q925H0 | DE | Amiloride-sensitive brain sodium channel;                                                                                                                                                                                                                      |
| P | Q925H0 | DE | Brain sodium channel 1;                                                                                                                                                                                                                                        |
| P | Q925H0 | DR | ligand-gated sodium channel activity                                                                                                                                                                                                                           |
| P | Q925Q3 | CC | In contrast to other members of the family its function is independent of K <sup>+</sup> (By similarity).                                                                                                                                                      |
| P | Q925Q3 | CC | Transports Ca <sup>2+</sup> in exchange for either Li <sup>+</sup> or Na <sup>+</sup> , explaining how Li <sup>+</sup> catalyzes Ca <sup>2+</sup> exchange                                                                                                     |
| P | Q925Q3 | CC | Transports Ca <sup>2+</sup> in exchange for either Li <sup>+</sup> or Na <sup>+</sup> , explaining how Li <sup>+</sup> catalyzes Ca <sup>2+</sup> exchange                                                                                                     |
| P | Q925Q3 | DE | Na <sup>+</sup> /K <sup>+</sup> /Ca <sup>2+</sup> -exchange protein 6;                                                                                                                                                                                         |
| P | Q925Q3 | DE | Na <sup>+</sup> /K <sup>+</sup> /Ca <sup>2+</sup> -exchange protein 6;                                                                                                                                                                                         |
| P | Q925Q3 | DE | Na <sup>+</sup> /K <sup>+</sup> /Ca <sup>2+</sup> -exchange protein 6;                                                                                                                                                                                         |
| P | Q925Q3 | DE | Sodium/potassium/calcium exchanger 6;                                                                                                                                                                                                                          |
| P | Q925Q3 | DE | Sodium/potassium/calcium exchanger 6;                                                                                                                                                                                                                          |
| P | Q925Q3 | DE | Sodium/potassium/calcium exchanger 6;                                                                                                                                                                                                                          |
| P | Q926D8 | CC | Involved in a zinc uptake transport system (Probable).                                                                                                                                                                                                         |
| P | Q926D8 | DE | Zinc uptake system ATP-binding protein ZurA;                                                                                                                                                                                                                   |
| P | Q92736 | CC | Contraction of cardiac muscle is triggered by release of calcium ions from SR following depolarization of T- tubules (By similarity).                                                                                                                          |
| P | Q92736 | DR | ryanodine-sensitive calcium-release channel activity                                                                                                                                                                                                           |
| P | Q927F9 | CC | One of the components of the high-affinity ATP-driven potassium transport (or KDP) system, which catalyzes the hydrolysis of ATP coupled with the exchange of hydrogen and potassium ions (By similarity).                                                     |
| P | Q927F9 | DE | Potassium-binding and translocating subunit A;                                                                                                                                                                                                                 |
| P | Q927F9 | DE | Potassium-translocating ATPase A chain;                                                                                                                                                                                                                        |
| P | Q927F9 | DE | Potassium-transporting ATPase A chain;                                                                                                                                                                                                                         |
| P | Q927F9 | DR | potassium-transporting ATPase activity                                                                                                                                                                                                                         |
| P | Q927G0 | CC | One of the components of the high-affinity ATP-driven potassium transport (or KDP) system, which catalyzes the hydrolysis of ATP coupled with the exchange of hydrogen and potassium ions (By similarity).                                                     |
| P | Q927G0 | DE | Potassium-binding and translocating subunit B 1;                                                                                                                                                                                                               |
| P | Q927G0 | DE | Potassium-translocating ATPase B chain 1;                                                                                                                                                                                                                      |
| P | Q927G0 | DE | Potassium-transporting ATPase B chain 1;                                                                                                                                                                                                                       |
| P | Q927G0 | DR | potassium-transporting ATPase activity                                                                                                                                                                                                                         |
| P | Q927G1 | CC | One of the components of the high-affinity ATP-driven potassium transport (or KDP) system, which catalyzes the hydrolysis of ATP coupled with the exchange of hydrogen and potassium ions                                                                      |
| P | Q927G1 | DE | Potassium-binding and translocating subunit C;                                                                                                                                                                                                                 |

|   |        |    |                                                                                                                                                                                                   |
|---|--------|----|---------------------------------------------------------------------------------------------------------------------------------------------------------------------------------------------------|
| P | Q927G1 | DE | Potassium-translocating ATPase C chain;                                                                                                                                                           |
| P | Q927G1 | DE | Potassium-transporting ATPase C chain;                                                                                                                                                            |
| P | Q927G1 | DR | potassium-transporting ATPase activity                                                                                                                                                            |
| P | Q927Z7 | CC | Part of the ABC transporter complex PstSACB involved in phosphate import                                                                                                                          |
| P | Q927Z7 | DE | ABC phosphate transporter 2;                                                                                                                                                                      |
| P | Q927Z7 | DE | Phosphate import ATP-binding protein PstB 2;                                                                                                                                                      |
| P | Q927Z7 | DE | Phosphate-transporting ATPase 2;                                                                                                                                                                  |
| P | Q927Z7 | DR | inorganic phosphate transmembrane transporter activity                                                                                                                                            |
| P | Q927Z7 | DR | phosphate transmembrane-transporting ATPase activity                                                                                                                                              |
| P | Q92806 | CC | Inward rectifier potassium channels are characterized by a greater tendency to allow potassium to flow into the cell rather than out of it                                                        |
| P | Q92806 | CC | Their voltage dependence is regulated by the concentration of extracellular potassium; as external potassium is raised, the voltage range of the channel opening shifts to more positive voltages |
| P | Q92806 | DE | G protein-activated inward rectifier potassium channel 3;                                                                                                                                         |
| P | Q92806 | DE | Inward rectifier K <sup>+</sup> channel Kir3.3;                                                                                                                                                   |
| P | Q92806 | DE | Potassium channel, inwardly rectifying subfamily J member 9;                                                                                                                                      |
| P | Q92806 | DR | G-protein activated inward rectifier potassium channel activity                                                                                                                                   |
| P | Q92911 | CC | Mediates iodide uptake in the thyroid gland.                                                                                                                                                      |
| P | Q92911 | DE | Na <sup>+</sup> /I <sup>(-)</sup> cotransporter;                                                                                                                                                  |
| P | Q92911 | DE | Na <sup>+</sup> /I <sup>(-)</sup> symporter;                                                                                                                                                      |
| P | Q92911 | DE | Sodium-iodide symporter;                                                                                                                                                                          |
| P | Q92911 | DE | Sodium/iodide cotransporter;                                                                                                                                                                      |
| P | Q92911 | DE | Sodium/iodide cotransporter;                                                                                                                                                                      |
| P | Q92911 | DR | iodide transmembrane transporter activity                                                                                                                                                         |
| P | Q92911 | DR | sodium:iodide symporter activity                                                                                                                                                                  |
| P | Q92911 | DR | sodium:iodide symporter activity                                                                                                                                                                  |
| P | Q92952 | CC | forms a voltage-independent potassium channel activated by intracellular cAMP                                                                                                                     |
| P | Q92953 | CC | Channel is open or close in response to the voltage difference across the membrane, letting potassium ions pass in accordance with their electrochemical gradient                                 |
| P | Q92953 | CC | mediates the voltage-dependent potassium ion permeability of excitable membranes                                                                                                                  |
| P | Q92953 | DE | Potassium voltage-gated channel subfamily B member 2;                                                                                                                                             |
| P | Q92953 | DE | Voltage-gated potassium channel subunit Kv2.2;                                                                                                                                                    |
| P | Q92953 | DR | delayed rectifier potassium channel activity                                                                                                                                                      |
| P | Q92BT1 | CC | H <sup>+</sup> -stimulated, highly selective, manganese uptake system (By similarity).                                                                                                            |
| P | Q92BT1 | DE | Probable manganese transport protein mntH;                                                                                                                                                        |
| P | Q92DL6 | CC | part of the ABC transporter complex PstABCD involved in spermidine/putrescine import                                                                                                              |
| P | Q92DL6 | CC | part of the ABC transporter complex PstABCD involved in spermidine/putrescine import                                                                                                              |
| P | Q92DL6 | DE | Spermidine/putrescine import ATP-binding protein PotA;                                                                                                                                            |
| P | Q92DL6 | DE | Spermidine/putrescine import ATP-binding protein PotA;                                                                                                                                            |
| P | Q92EZ6 | CC | Part of the ABC transporter complex MetNIQ involved in methionine import                                                                                                                          |
| P | Q92EZ6 | DE | Methionine import ATP-binding protein MetN 1;                                                                                                                                                     |
| P | Q92G36 | CC | Part of the ABC transporter complex ZnuABC involved in zinc import                                                                                                                                |
| P | Q92G36 | DE | Zinc import ATP-binding protein ZnuC;                                                                                                                                                             |
| P | Q92G36 | DR | zinc transporting ATPase activity                                                                                                                                                                 |
| P | Q92G95 | CC | Part of the ABC transporter complex CcmAB involved in the biogenesis of c-type cytochromes; once thought to export heme, this seems not to be the case, but its exact role is uncertain           |
| P | Q92G95 | DE | Heme exporter protein A;                                                                                                                                                                          |
| P | Q92G95 | DR | heme-transporting ATPase activity                                                                                                                                                                 |
| P | Q92GI5 | CC | Provides the rickettsial cell with host ATP in exchange for rickettsial ADP                                                                                                                       |
| P | Q92GI5 | CC | Provides the rickettsial cell with host ATP in exchange for rickettsial ADP                                                                                                                       |
| P | Q92GI5 | DE | ADP,ATP carrier protein 5;                                                                                                                                                                        |
| P | Q92GI5 | DE | ADP/ATP translocase 5;                                                                                                                                                                            |
| P | Q92GI5 | DE | ADP/ATP translocase 5;                                                                                                                                                                            |
| P | Q92GI5 | DR | ATP:ADP antiporter activity                                                                                                                                                                       |
| P | Q92GI5 | DR | ATP:ADP antiporter activity                                                                                                                                                                       |
| P | Q92HP9 | CC | Provides the rickettsial cell with host ATP in exchange for rickettsial ADP                                                                                                                       |
| P | Q92HP9 | CC | Provides the rickettsial cell with host ATP in exchange for rickettsial ADP                                                                                                                       |
| P | Q92HP9 | DE | ADP,ATP carrier protein 3;                                                                                                                                                                        |
| P | Q92HP9 | DE | ADP/ATP translocase 3;                                                                                                                                                                            |
| P | Q92HP9 | DE | ADP/ATP translocase 3;                                                                                                                                                                            |
| P | Q92HP9 | DR | ATP:ADP antiporter activity                                                                                                                                                                       |
| P | Q92HP9 | DR | ATP:ADP antiporter activity                                                                                                                                                                       |
| P | Q92HV4 | CC | Provides the rickettsial cell with host ATP in exchange for rickettsial ADP                                                                                                                       |

|   |        |    |                                                                                                                                                                                                            |
|---|--------|----|------------------------------------------------------------------------------------------------------------------------------------------------------------------------------------------------------------|
| P | Q92HV4 | CC | Provides the rickettsial cell with host ATP in exchange for rickettsial ADP                                                                                                                                |
| P | Q92HV4 | DE | ADP,ATP carrier protein 4;                                                                                                                                                                                 |
| P | Q92HV4 | DE | ADP/ATP translocase 4;                                                                                                                                                                                     |
| P | Q92HV4 | DE | ADP/ATP translocase 4;                                                                                                                                                                                     |
| P | Q92HV4 | DR | ATP:ADP antiporter activity                                                                                                                                                                                |
| P | Q92HV4 | DR | ATP:ADP antiporter activity                                                                                                                                                                                |
| P | Q92J96 | CC | Part of the binding-protein-dependent transport system for glutamine; probably responsible for the translocation of the substrate across the membrane (By similarity)                                      |
| P | Q92J96 | DE | Putative glutamine transport system permease protein glnP;                                                                                                                                                 |
| P | Q92JG1 | CC | Transports S-adenosylmethionine (By similarity).                                                                                                                                                           |
| P | Q92JG1 | DE | S-adenosylmethionine uptake transporter;                                                                                                                                                                   |
| P | Q92JI6 | CC | Provides the rickettsial cell with host ATP in exchange for rickettsial ADP                                                                                                                                |
| P | Q92JI6 | CC | Provides the rickettsial cell with host ATP in exchange for rickettsial ADP                                                                                                                                |
| P | Q92JI6 | DE | ADP,ATP carrier protein 1;                                                                                                                                                                                 |
| P | Q92JI6 | DE | ADP/ATP translocase 1;                                                                                                                                                                                     |
| P | Q92JI6 | DE | ADP/ATP translocase 1;                                                                                                                                                                                     |
| P | Q92JI6 | DR | ATP:ADP antiporter activity                                                                                                                                                                                |
| P | Q92JI6 | DR | ATP:ADP antiporter activity                                                                                                                                                                                |
| P | Q92L31 | CC | Part of the ABC transporter complex ThiBPQ involved in thiamine import                                                                                                                                     |
| P | Q92L31 | DE | Thiamine import ATP-binding protein ThiQ;                                                                                                                                                                  |
| P | Q92LU2 | CC | Part of the ABC transporter complex ModABC involved in molybdenum import                                                                                                                                   |
| P | Q92LU2 | DE | Molybdenum import ATP-binding protein ModC;                                                                                                                                                                |
| P | Q92LU2 | DR | molybdenum ion transmembrane transporter activity                                                                                                                                                          |
| P | Q92N13 | CC | Part of the ABC transporter complex HmuTUV involved in hemin import                                                                                                                                        |
| P | Q92N13 | DE | Hemin import ATP-binding protein HmuV;                                                                                                                                                                     |
| P | Q92NM3 | CC | Channel that permits osmotically driven movement of water in both directions                                                                                                                               |
| P | Q92NM3 | CC | It mediates rapid entry or exit of water in response to abrupt changes in osmolarity (By similarity).                                                                                                      |
| P | Q92P76 | CC | Part of the ABC transporter complex ZnuABC involved in zinc import                                                                                                                                         |
| P | Q92P76 | DE | Zinc import ATP-binding protein ZnuC;                                                                                                                                                                      |
| P | Q92P76 | DR | zinc transporting ATPase activity                                                                                                                                                                          |
| P | Q92RN0 | CC | Transport of potassium into the cell (By similarity).                                                                                                                                                      |
| P | Q92RN0 | DE | Probable potassium transport system protein kup 1;                                                                                                                                                         |
| P | Q92RN0 | DR | potassium ion transmembrane transporter activity                                                                                                                                                           |
| P | Q92SA1 | CC | Part of the ABC transporter complex PstSACB involved in phosphate import                                                                                                                                   |
| P | Q92SA1 | DE | ABC phosphate transporter;                                                                                                                                                                                 |
| P | Q92SA1 | DE | Phosphate import ATP-binding protein PstB;                                                                                                                                                                 |
| P | Q92SA1 | DE | Phosphate-transporting ATPase;                                                                                                                                                                             |
| P | Q92SA1 | DR | inorganic phosphate transmembrane transporter activity                                                                                                                                                     |
| P | Q92SA1 | DR | phosphate transmembrane-transporting ATPase activity                                                                                                                                                       |
| P | Q92UI2 | CC | Part of the ABC transporter complex RbsABCD involved in ribose import                                                                                                                                      |
| P | Q92UI2 | DE | Ribose import ATP-binding protein RbsA 3;                                                                                                                                                                  |
| P | Q92UX0 | CC | Part of the ABC transporter complex TauABC involved in taurine import                                                                                                                                      |
| P | Q92UX0 | DE | Taurine import ATP-binding protein TauB;                                                                                                                                                                   |
| P | Q92UX0 | DR | taurine-transporting ATPase activity                                                                                                                                                                       |
| P | Q92V71 | DR | phosphonate transmembrane-transporting ATPase activity                                                                                                                                                     |
| P | Q92VJ2 | CC | Part of the ABC transporter complex CysAW 1F involved in sulfate/inosulfate import                                                                                                                         |
| P | Q92VJ2 | DE | Sulfate-transporting ATPase 2;                                                                                                                                                                             |
| P | Q92VJ2 | DE | Sulfate/thiosulfate import ATP-binding protein CysA 2;                                                                                                                                                     |
| P | Q92VJ2 | DR | sulfate transmembrane-transporting ATPase activity                                                                                                                                                         |
| P | Q92W60 | CC | Part of the ABC transporter complex RbsABCD involved in ribose import                                                                                                                                      |
| P | Q92W60 | DE | Ribose import ATP-binding protein RbsA 2;                                                                                                                                                                  |
| P | Q92WD6 | DR | glycerol-3-phosphate-transporting ATPase activity                                                                                                                                                          |
| P | Q92XJ0 | CC | One of the components of the high-affinity ATP-driven potassium transport (or KDP) system, which catalyzes the hydrolysis of ATP coupled with the exchange of hydrogen and potassium ions (By similarity). |
| P | Q92XJ0 | DE | Potassium-binding and translocating subunit B;                                                                                                                                                             |
| P | Q92XJ0 | DE | Potassium-translocating ATPase B chain;                                                                                                                                                                    |
| P | Q92XJ0 | DE | Potassium-transporting ATPase B chain;                                                                                                                                                                     |
| P | Q92XJ0 | DR | potassium-transporting ATPase activity                                                                                                                                                                     |
| P | Q92XW1 | CC | Part of the ABC transporter complex CysAW 1F involved in sulfate/inosulfate import                                                                                                                         |
| P | Q92XW1 | DE | Sulfate-transporting ATPase 1;                                                                                                                                                                             |
| P | Q92XW1 | DE | Sulfate/thiosulfate import ATP-binding protein CysA 1;                                                                                                                                                     |
| P | Q92XW1 | DR | sulfate transmembrane-transporting ATPase activity                                                                                                                                                         |
| P | Q92Y37 | CC | Na+/H+ antiporter that extrudes sodium in exchange for external protons (By similarity)                                                                                                                    |



|   |        |    |                                                                                                                                                                                     |
|---|--------|----|-------------------------------------------------------------------------------------------------------------------------------------------------------------------------------------|
| P | Q92Y37 | DE | Na <sup>+</sup> /H <sup>+</sup> antiporter nhaA;                                                                                                                                    |
| P | Q92Y37 | DE | Sodium/proton antiporter nhaA;                                                                                                                                                      |
| P | Q92Y93 | CC | Transport of potassium into the cell (By similarity).                                                                                                                               |
| P | Q92Y93 | DE | Probable potassium transport system protein kup 2;                                                                                                                                  |
| P | Q92Y93 | DR | potassium ion transmembrane transporter activity                                                                                                                                    |
| P | Q92ZW9 | CC | Channel that permits osmotically driven movement of water in both directions                                                                                                        |
| P | Q92ZW9 | CC | It mediates rapid entry or exit of water in response to abrupt changes in osmolarity (By similarity).                                                                               |
| P | Q93235 | CC | Non-catalytic component of the active enzyme, which catalyzes the hydrolysis of ATP coupled with the exchange of Na <sup>+</sup> and K <sup>+</sup> ions across the plasma membrane |
| P | Q93235 | CC | Non-catalytic component of the active enzyme, which catalyzes the hydrolysis of ATP coupled with the exchange of Na <sup>+</sup> and K <sup>+</sup> ions across the plasma membrane |
| P | Q93235 | CC | The beta subunit regulates, through assembly of alpha/beta heterodimers, the number of sodium pumps transported to the plasma membrane (By similarity)                              |
| P | Q93235 | DE | Sodium/potassium-dependent ATPase subunit beta-1;                                                                                                                                   |
| P | Q93235 | DE | Sodium/potassium-dependent ATPase subunit beta-1;                                                                                                                                   |
| P | Q93235 | DE | Sodium/potassium-transporting ATPase subunit beta-1;                                                                                                                                |
| P | Q93235 | DE | Sodium/potassium-transporting ATPase subunit beta-1;                                                                                                                                |
| P | Q93235 | DR | sodium:potassium-exchanging ATPase activity                                                                                                                                         |
| P | Q93235 | DR | sodium:potassium-exchanging ATPase activity                                                                                                                                         |
| P | Q93DA2 | CC | Part of the ABC transporter complex MetNIQ involved in methionine import                                                                                                            |
| P | Q93DA2 | DE | Methionine import ATP-binding protein MetN;                                                                                                                                         |
| P | Q93IM6 | DR | voltage-gated chloride channel activity                                                                                                                                             |
| P | Q93SH7 | CC | Part of the ABC transporter complex HmuTUV involved in hemin import                                                                                                                 |
| P | Q93SH7 | DE | Hemin import ATP-binding protein HmuV;                                                                                                                                              |
| P | Q93XM7 | CC | may transport carnitine or acylcarnitine from the cytosol to the mitochondrial matrix as an alternative or a complement to the succinate-producing glyoxylate cycle                 |
| P | Q93XM7 | DE | Carnitine/acylcarnitine translocase-like protein;                                                                                                                                   |
| P | Q93XM7 | DE | Mitochondrial carnitine/acylcarnitine carrier-like protein;                                                                                                                         |
| P | Q93Y91 | DE | Hexose transporter 5;                                                                                                                                                               |
| P | Q93YH1 | DE | Sodium/hydrogen exchanger;                                                                                                                                                          |
| P | Q93YH1 | DR | sodium:hydrogen antiporter activity                                                                                                                                                 |
| P | Q93Z75 | DR | allantoin uptake transmembrane transporter activity                                                                                                                                 |
| P | Q93Z81 | CC | Translocates Ca <sup>2+</sup> and other metal ions into vacuoles using the proton gradient formed by H <sup>+</sup> -ATPase and H <sup>+</sup> -pyrophosphatase (By similarity)     |
| P | Q93Z81 | DE | Ca <sup>2+</sup> /H <sup>+</sup> antiporter CAX3;                                                                                                                                   |
| P | Q93Z81 | DE | Ca <sup>2+</sup> /H <sup>+</sup> exchanger 3;                                                                                                                                       |
| P | Q93Z81 | DR | calcium:hydrogen antiporter activity                                                                                                                                                |
| P | Q93ZD7 | CC | magnesium transporter that may mediate the influx of magnesium (By similarity)                                                                                                      |
| P | Q93ZD7 | DE | Magnesium Transporter 6;                                                                                                                                                            |
| P | Q93ZD7 | DE | Magnesium transporter MRS2-4;                                                                                                                                                       |
| P | Q93ZD7 | DR | magnesium ion transmembrane transporter activity                                                                                                                                    |
| P | Q94225 | CC | Possible sulfate transporter.                                                                                                                                                       |
| P | Q94225 | DE | Sulfate permease family protein 3;                                                                                                                                                  |
| P | Q94225 | DR | secondary active sulfate transmembrane transporter activity                                                                                                                         |
| P | Q942X8 | CC | High-affinity potassium transporter (By similarity).                                                                                                                                |
| P | Q942X8 | DE | Probable potassium transporter 2;                                                                                                                                                   |
| P | Q942X8 | DR | potassium ion transmembrane transporter activity                                                                                                                                    |
| P | Q94526 | CC | Acts as an outwardly rectifying channel but as external potassium levels increase, this is reversed.                                                                                |
| P | Q94526 | CC | Background potassium channel                                                                                                                                                        |
| P | Q94526 | CC | Rectification is dependent on external potassium concentration                                                                                                                      |
| P | Q94526 | DE | Open rectifier potassium channel protein 1;                                                                                                                                         |
| P | Q94526 | DE | Two pore domain potassium channel Ork1;                                                                                                                                             |
| P | Q94526 | DR | potassium channel activity                                                                                                                                                          |
| P | Q945S5 | CC | Translocates Ca <sup>2+</sup> and other metal ions into vacuoles using the proton gradient formed by H <sup>+</sup> -ATPase and H <sup>+</sup> -pyrophosphatase                     |
| P | Q945S5 | DE | Ca <sup>2+</sup> /H <sup>+</sup> antiporter CAX4;                                                                                                                                   |
| P | Q945S5 | DE | Ca <sup>2+</sup> /H <sup>+</sup> exchanger 4;                                                                                                                                       |
| P | Q945S5 | DR | calcium:hydrogen antiporter activity                                                                                                                                                |
| P | Q94A76 | CC | Conductance of the channel is modulated in a potassium-dependent fashion                                                                                                            |
| P | Q94A76 | CC | major selective outward-rectifying potassium channel of the guard cell membrane                                                                                                     |
| P | Q94A76 | DE | Guard cell outward rectifying K <sup>+</sup> channel;                                                                                                                               |
| P | Q94A76 | DE | Potassium channel GORK;                                                                                                                                                             |
| P | Q94A76 | DR | outward rectifier potassium channel activity                                                                                                                                        |

|   |        |    |                                                                                                                                                                                                                                             |
|---|--------|----|---------------------------------------------------------------------------------------------------------------------------------------------------------------------------------------------------------------------------------------------|
| P | Q94AZ2 | DE | Hexose transporter 13;                                                                                                                                                                                                                      |
| P | Q94AZ2 | DR | high-affinity hydrogen:glucose symporter activity                                                                                                                                                                                           |
| P | Q94CI6 | CC | Sugar transporter (Potential).                                                                                                                                                                                                              |
| P | Q94CI6 | DE | Sugar transporter ERD6-like 18;                                                                                                                                                                                                             |
| P | Q94CI6 | DE | Sugar-porter family protein 2;                                                                                                                                                                                                              |
| P | Q94CI7 | CC | Sugar transporter (Potential).                                                                                                                                                                                                              |
| P | Q94CI7 | DE | Sugar transporter ERD6-like 17;                                                                                                                                                                                                             |
| P | Q94CI7 | DE | Sugar-porter family protein 1;                                                                                                                                                                                                              |
| P | Q94DB8 | CC | Symbiosis-specific regulated inorganic phosphate (Pi) transporter                                                                                                                                                                           |
| P | Q94DB8 | DE | Inorganic phosphate transporter 1-11;                                                                                                                                                                                                       |
| P | Q94EG9 | CC | Probably mediates zinc uptake from the rhizosphere (By similarity).                                                                                                                                                                         |
| P | Q94EG9 | DE | Zinc transporter 11;                                                                                                                                                                                                                        |
| P | Q94KE0 | CC | Sugar transporter (Potential).                                                                                                                                                                                                              |
| P | Q94KE0 | DE | Sugar transporter ERD6-like 3;                                                                                                                                                                                                              |
| P | Q94KE0 | DE | Sugar transporter-like protein 2;                                                                                                                                                                                                           |
| P | Q94KI8 | CC | Acts as the major ROS-responsive Ca <sup>2+</sup> channel and is the possible target of Al-dependent inhibition                                                                                                                             |
| P | Q94KI8 | CC | Functions as a voltage-gated inward-rectifying Ca <sup>2+</sup> channel (VDCC) across the vacuole membrane                                                                                                                                  |
| P | Q94KI8 | DE | Calcium channel protein 1;                                                                                                                                                                                                                  |
| P | Q94KI8 | DE | Two pore calcium channel protein 1;                                                                                                                                                                                                         |
| P | Q94KI8 | DE | Voltage-dependent calcium channel protein TPC1;                                                                                                                                                                                             |
| P | Q94KI8 | DR | voltage-gated calcium channel activity                                                                                                                                                                                                      |
| P | Q94LW6 | CC | H <sup>+</sup> /sulfate cotransporter that may play a role in the regulation of sulfate assimilation (By similarity).                                                                                                                       |
| P | Q94LW6 | DE | Probable sulfate transporter 3.5;                                                                                                                                                                                                           |
| P | Q94LW6 | DR | secondary active sulfate transmembrane transporter activity                                                                                                                                                                                 |
| P | Q95YI5 | DE | UDP-sugar transporter UST74c;                                                                                                                                                                                                               |
| P | Q96243 | CC | High-affinity transporter for external inorganic phosphate (By similarity).                                                                                                                                                                 |
| P | Q96243 | DE | Probable inorganic phosphate transporter 1-2;                                                                                                                                                                                               |
| P | Q96243 | DR | inorganic phosphate transmembrane transporter activity                                                                                                                                                                                      |
| P | Q96282 | CC | Voltage-gated chloride channel.                                                                                                                                                                                                             |
| P | Q96282 | DE | Chloride channel protein CLC-c;                                                                                                                                                                                                             |
| P | Q96282 | DR | voltage-gated chloride channel activity                                                                                                                                                                                                     |
| P | Q96290 | DE | Sugar transporter MSSP1;                                                                                                                                                                                                                    |
| P | Q96290 | DE | Sugar transporter MT1;                                                                                                                                                                                                                      |
| P | Q96303 | CC | Acts as a H <sup>+</sup> :phosphate symporter in both low- and high-Pi conditions                                                                                                                                                           |
| P | Q96303 | CC | High-affinity transporter for external inorganic phosphate                                                                                                                                                                                  |
| P | Q96303 | DE | Inorganic phosphate transporter 1-4;                                                                                                                                                                                                        |
| P | Q96303 | DR | inorganic phosphate transmembrane transporter activity                                                                                                                                                                                      |
| P | Q969S0 | CC | Sugar transporter that specifically mediates the transport of UDP-xylose (UDP-Xyl) and UDP-N-acetylglucosamine (UDP-GlcNAc) from cytosol into Golgi.                                                                                        |
| P | Q969S0 | DE | UDP-xylose and UDP-N-acetylglucosamine transporter;                                                                                                                                                                                         |
| P | Q969S0 | DR | UDP-N-acetylglucosamine transmembrane transporter activity                                                                                                                                                                                  |
| P | Q96D31 | CC | CRAC channels are the main pathway for Ca <sup>2+</sup> influx in T-cells and promote the immune response to pathogens by activating the transcription factor NFAT.                                                                         |
| P | Q96D31 | CC | Ca <sup>2+</sup> release-activated Ca <sup>2+</sup> (CRAC) channel subunit which mediates Ca <sup>2+</sup> influx following depletion of intracellular Ca <sup>2+</sup> stores and channel activation by the Ca <sup>2+</sup> sensor, STIM1 |
| P | Q96D31 | DE | Calcium release-activated calcium channel protein 1;                                                                                                                                                                                        |
| P | Q96D31 | DR | store-operated calcium channel activity                                                                                                                                                                                                     |
| P | Q96EP9 | DE | Na <sup>+</sup> /bile acid cotransporter 4;                                                                                                                                                                                                 |
| P | Q96EP9 | DE | Na <sup>+</sup> /bile acid cotransporter 4;                                                                                                                                                                                                 |
| P | Q96EP9 | DE | Sodium/bile acid cotransporter 4;                                                                                                                                                                                                           |
| P | Q96EP9 | DE | Sodium/bile acid cotransporter 4;                                                                                                                                                                                                           |
| P | Q96EP9 | DR | bile acid:sodium symporter activity                                                                                                                                                                                                         |
| P | Q96EP9 | DR | bile acid:sodium symporter activity                                                                                                                                                                                                         |
| P | Q96FT7 | CC | Probable cation channel with high affinity for sodium                                                                                                                                                                                       |
| P | Q96FT7 | DR | sodium channel activity                                                                                                                                                                                                                     |
| P | Q96FT7 | DR | sodium ion transmembrane transporter activity                                                                                                                                                                                               |
| P | Q96H72 | DE | LIV-1 subfamily of ZIP zinc transporter 9;                                                                                                                                                                                                  |
| P | Q96H72 | DE | Zinc transporter ZIP13;                                                                                                                                                                                                                     |

|   |        |    |                                                                                                                                                                                                                                                                                                                                                                                                                                 |
|---|--------|----|---------------------------------------------------------------------------------------------------------------------------------------------------------------------------------------------------------------------------------------------------------------------------------------------------------------------------------------------------------------------------------------------------------------------------------|
| P | Q96J66 | CC | Stimulates the ATP-dependent uptake of a range of physiological and synthetic lipophilic anions, including the glutathione S-conjugates leukotriene C4 and dinitrophenyl S-glutathione, steroid sulfates such as dehydroepiandrosterone 3-sulfate (DHEAS) and estrone 3-sulfate, glucuronides such as estradiol 17-beta-D-glucuronide (E(2)17betaG), the monoanionic bile acids glycocholate and taurocholate and methotrexate. |
| P | Q96JW4 | CC | Acts as a plasma-membrane magnesium transporter.                                                                                                                                                                                                                                                                                                                                                                                |
| P | Q96JW4 | DR | magnesium ion transmembrane transporter activity                                                                                                                                                                                                                                                                                                                                                                                |
| P | Q96KK3 | CC | Potassium channel subunit                                                                                                                                                                                                                                                                                                                                                                                                       |
| P | Q96KK3 | DE | Delayed-rectifier K+ channel alpha subunit 1;                                                                                                                                                                                                                                                                                                                                                                                   |
| P | Q96KK3 | DE | Potassium voltage-gated channel subfamily S member 1;                                                                                                                                                                                                                                                                                                                                                                           |
| P | Q96KK3 | DE | Voltage-gated potassium channel subunit Kv9.1;                                                                                                                                                                                                                                                                                                                                                                                  |
| P | Q96KK3 | DR | delayed rectifier potassium channel activity                                                                                                                                                                                                                                                                                                                                                                                    |
| P | Q96KK3 | DR | potassium channel regulator activity                                                                                                                                                                                                                                                                                                                                                                                            |
| P | Q96L42 | CC | Pore-forming (alpha) subunit of voltage-gated potassium channel                                                                                                                                                                                                                                                                                                                                                                 |
| P | Q96L42 | DE | Ether-a-go-go-like potassium channel 3;                                                                                                                                                                                                                                                                                                                                                                                         |
| P | Q96L42 | DE | Potassium voltage-gated channel subfamily H member 8;                                                                                                                                                                                                                                                                                                                                                                           |
| P | Q96L42 | DE | Voltage-gated potassium channel subunit Kv12.1;                                                                                                                                                                                                                                                                                                                                                                                 |
| P | Q96MC6 | DE | Putative tetracycline transporter-like protein;                                                                                                                                                                                                                                                                                                                                                                                 |
| P | Q96MC6 | DR | tetracycline:hydrogen antiporter activity                                                                                                                                                                                                                                                                                                                                                                                       |
| P | Q96N87 | DE | Sodium- and chloride-dependent transporter XTRP2;                                                                                                                                                                                                                                                                                                                                                                               |
| P | Q96N87 | DE | Sodium-dependent neutral amino acid transporter B(0)AT3;                                                                                                                                                                                                                                                                                                                                                                        |
| P | Q96N87 | DR | neurotransmitter:sodium symporter activity                                                                                                                                                                                                                                                                                                                                                                                      |
| P | Q96NT5 | CC | Has been shown to act both as an intestinal proton- coupled high-affinity folate transporter and as an intestinal heme transporter which mediates heme uptake from the gut lumen into duodenal epithelial cells                                                                                                                                                                                                                 |
| P | Q96NT5 | CC | Shows a higher affinity for folate than heme.                                                                                                                                                                                                                                                                                                                                                                                   |
| P | Q96NT5 | DE | Proton-coupled folate transporter;                                                                                                                                                                                                                                                                                                                                                                                              |
| P | Q96NT5 | DR | folic acid transporter activity                                                                                                                                                                                                                                                                                                                                                                                                 |
| P | Q96NY7 | CC | May insert into membranes and form chloride ion channels                                                                                                                                                                                                                                                                                                                                                                        |
| P | Q96NY7 | CC | May play a critical role in water-secreting cells, possibly through the regulation of chloride ion transport (By similarity).                                                                                                                                                                                                                                                                                                   |
| P | Q96NY7 | DE | Chloride intracellular channel protein 6;                                                                                                                                                                                                                                                                                                                                                                                       |
| P | Q96NY7 | DR | voltage-gated chloride channel activity                                                                                                                                                                                                                                                                                                                                                                                         |
| P | Q96PR1 | CC | Assuming opened or closed conformations in response to the voltage difference across the membrane, the protein forms a potassium-selective channel through which potassium ions may pass in accordance with their electrochemical gradient                                                                                                                                                                                      |
| P | Q96PR1 | CC | Mediates the voltage-dependent potassium ion permeability of excitable membranes                                                                                                                                                                                                                                                                                                                                                |
| P | Q96PR1 | DE | Potassium voltage-gated channel subfamily C member 2;                                                                                                                                                                                                                                                                                                                                                                           |
| P | Q96PR1 | DE | Voltage-gated potassium channel Kv3.2;                                                                                                                                                                                                                                                                                                                                                                                          |
| P | Q96PR1 | DR | voltage-gated potassium channel activity                                                                                                                                                                                                                                                                                                                                                                                        |
| P | Q96PS8 | CC | May contribute to water transport in the upper portion of small intestine                                                                                                                                                                                                                                                                                                                                                       |
| P | Q96PS8 | CC | Water channel required to promote glycerol permeability and water transport across cell membranes                                                                                                                                                                                                                                                                                                                               |
| P | Q96QE2 | DE | Proton myo-inositol cotransporter;                                                                                                                                                                                                                                                                                                                                                                                              |
| P | Q96QE2 | DR | myo-inositol:hydrogen symporter activity                                                                                                                                                                                                                                                                                                                                                                                        |
| P | Q96QT4 | CC | Divalent cation channel permeable to calcium and magnesium                                                                                                                                                                                                                                                                                                                                                                      |
| P | Q96QT4 | CC | Divalent cation channel permeable to calcium and magnesium                                                                                                                                                                                                                                                                                                                                                                      |
| P | Q96QT4 | CC | Has a central role in magnesium ion homeostasis and in the regulation of anoxic neuronal cell death                                                                                                                                                                                                                                                                                                                             |
| P | Q96QT4 | CC | May be involved in a fundamental process that adjusts plasma membrane divalent cation fluxes according to the metabolic state of the cell                                                                                                                                                                                                                                                                                       |
| P | Q96RP8 | CC | Assuming opened or closed conformations in response to the voltage difference across the membrane, the protein forms a potassium-selective channel through which potassium ions may pass in accordance with their electrochemical gradient                                                                                                                                                                                      |
| P | Q96RP8 | CC | Mediates the voltage-dependent potassium ion permeability of excitable membranes (By similarity).                                                                                                                                                                                                                                                                                                                               |
| P | Q96RP8 | DE | Potassium voltage-gated channel subfamily A member 7;                                                                                                                                                                                                                                                                                                                                                                           |
| P | Q96RP8 | DE | Voltage-gated potassium channel subunit Kv1.7;                                                                                                                                                                                                                                                                                                                                                                                  |
| P | Q96RP8 | DR | voltage-gated potassium channel activity                                                                                                                                                                                                                                                                                                                                                                                        |
| P | Q96S37 | CC | Mediates saturable urate uptake by facilitating the exchange of urate against organic anions.                                                                                                                                                                                                                                                                                                                                   |
| P | Q96S37 | CC | Regulates blood urate levels                                                                                                                                                                                                                                                                                                                                                                                                    |
| P | Q96S37 | CC | Required for efficient urate re-absorption in the kidney                                                                                                                                                                                                                                                                                                                                                                        |
| P | Q96S37 | DE | Urate anion exchanger 1;                                                                                                                                                                                                                                                                                                                                                                                                        |
| P | Q96S37 | DR | urate transmembrane transporter activity                                                                                                                                                                                                                                                                                                                                                                                        |
| P | Q96T54 | CC | Outward rectifying potassium channel                                                                                                                                                                                                                                                                                                                                                                                            |

|   |        |    |                                                                                                                                                                                                            |
|---|--------|----|------------------------------------------------------------------------------------------------------------------------------------------------------------------------------------------------------------|
| P | Q96T54 | CC | Produces rapidly activating and non-inactivating outward rectifier K <sup>+</sup> currents.                                                                                                                |
| P | Q96T54 | DE | 2P domain potassium channel Talk-2;                                                                                                                                                                        |
| P | Q96T54 | DE | Acid-sensitive potassium channel protein TASK-4;                                                                                                                                                           |
| P | Q96T54 | DE | Potassium channel subfamily K member 17;                                                                                                                                                                   |
| P | Q96T54 | DE | TWIK-related acid-sensitive K <sup>+</sup> channel 4;                                                                                                                                                      |
| P | Q96T54 | DE | TWIK-related alkaline pH-activated K <sup>+</sup> channel 2;                                                                                                                                               |
| P | Q96T54 | DR | potassium channel activity                                                                                                                                                                                 |
| P | Q96T55 | CC | Outward rectifying potassium channel                                                                                                                                                                       |
| P | Q96T55 | CC | Produces rapidly activating and non-inactivating outward rectifier K <sup>+</sup> currents.                                                                                                                |
| P | Q96T55 | DE | 2P domain potassium channel Talk-1;                                                                                                                                                                        |
| P | Q96T55 | DE | Potassium channel subfamily K member 16;                                                                                                                                                                   |
| P | Q96T55 | DE | TWIK-related alkaline pH-activated K <sup>+</sup> channel 1;                                                                                                                                               |
| P | Q96T55 | DR | potassium channel activity                                                                                                                                                                                 |
| P | Q96T83 | CC | mediates electrochemical exchange of protons for Na <sup>+</sup> and K <sup>+</sup> across endomembranes                                                                                                   |
| P | Q96T83 | DE | Na <sup>+</sup> /H <sup>+</sup> exchanger 7;                                                                                                                                                               |
| P | Q96T83 | DE | Na <sup>+</sup> /H <sup>+</sup> exchanger 7;                                                                                                                                                               |
| P | Q96T83 | DE | Sodium/hydrogen exchanger 7;                                                                                                                                                                               |
| P | Q96T83 | DR | sodium:hydrogen antiporter activity                                                                                                                                                                        |
| P | Q978Z8 | DR | copper-exporting ATPase activity                                                                                                                                                                           |
| P | Q97BF5 | CC | One of the components of the high-affinity ATP-driven potassium transport (or KDP) system, which catalyzes the hydrolysis of ATP coupled with the exchange of hydrogen and potassium ions                  |
| P | Q97BF5 | DE | Potassium-binding and translocating subunit C;                                                                                                                                                             |
| P | Q97BF5 | DE | Potassium-translocating ATPase C chain;                                                                                                                                                                    |
| P | Q97BF5 | DE | Potassium-transporting ATPase C chain;                                                                                                                                                                     |
| P | Q97BF5 | DR | potassium-transporting ATPase activity                                                                                                                                                                     |
| P | Q97BF6 | CC | One of the components of the high-affinity ATP-driven potassium transport (or KDP) system, which catalyzes the hydrolysis of ATP coupled with the exchange of hydrogen and potassium ions (By similarity). |
| P | Q97BF6 | DE | Potassium-binding and translocating subunit B;                                                                                                                                                             |
| P | Q97BF6 | DE | Potassium-translocating ATPase B chain;                                                                                                                                                                    |
| P | Q97BF6 | DE | Potassium-transporting ATPase B chain;                                                                                                                                                                     |
| P | Q97BF6 | DR | potassium-transporting ATPase activity                                                                                                                                                                     |
| P | Q97BF7 | CC | One of the components of the high-affinity ATP-driven potassium transport (or KDP) system, which catalyzes the hydrolysis of ATP coupled with the exchange of hydrogen and potassium ions (By similarity). |
| P | Q97BF7 | DE | Potassium-binding and translocating subunit A;                                                                                                                                                             |
| P | Q97BF7 | DE | Potassium-translocating ATPase A chain;                                                                                                                                                                    |
| P | Q97BF7 | DE | Potassium-transporting ATPase A chain;                                                                                                                                                                     |
| P | Q97BF7 | DR | potassium-transporting ATPase activity                                                                                                                                                                     |
| P | Q97IE0 | CC | Part of the ABC transporter complex PstSACB involved in phosphate import                                                                                                                                   |
| P | Q97IE0 | DE | ABC phosphate transporter;                                                                                                                                                                                 |
| P | Q97IE0 | DE | Phosphate import ATP-binding protein PstB;                                                                                                                                                                 |
| P | Q97IE0 | DE | Phosphate-transporting ATPase;                                                                                                                                                                             |
| P | Q97IE0 | DR | inorganic phosphate transmembrane transporter activity                                                                                                                                                     |
| P | Q97IE0 | DR | phosphate transmembrane-transporting ATPase activity                                                                                                                                                       |
| P | Q97KD5 | CC | Part of the ABC transporter complex MetNIQ involved in methionine import                                                                                                                                   |
| P | Q97KD5 | DE | Methionine import ATP-binding protein MetN;                                                                                                                                                                |
| P | Q97KS6 | CC | Part of the ABC transporter complex PotABCD involved in spermidine/putrescine import                                                                                                                       |
| P | Q97KS6 | CC | Part of the ABC transporter complex PotABCD involved in spermidine/putrescine import                                                                                                                       |
| P | Q97KS6 | DE | Spermidine/putrescine import ATP-binding protein PotA;                                                                                                                                                     |
| P | Q97KS6 | DE | Spermidine/putrescine import ATP-binding protein PotA;                                                                                                                                                     |
| P | Q97Q31 | CC | Part of the ABC transporter complex pstSACB involved in phosphate import (By similarity).                                                                                                                  |
| P | Q97Q31 | DE | Phosphate-binding protein pstS 1;                                                                                                                                                                          |
| P | Q97Q34 | CC | Part of the ABC transporter complex PstSACB involved in phosphate import                                                                                                                                   |
| P | Q97Q34 | DE | ABC phosphate transporter 2;                                                                                                                                                                               |
| P | Q97Q34 | DE | Phosphate import ATP-binding protein PstB 2;                                                                                                                                                               |
| P | Q97Q34 | DE | Phosphate-transporting ATPase 2;                                                                                                                                                                           |
| P | Q97Q34 | DR | inorganic phosphate transmembrane transporter activity                                                                                                                                                     |
| P | Q97Q34 | DR | phosphate transmembrane-transporting ATPase activity                                                                                                                                                       |
| P | Q97Q42 | CC | Part of the ABC transporter complex PotABCD involved in spermidine/putrescine import                                                                                                                       |
| P | Q97Q42 | DE | Spermidine/putrescine import ATP-binding protein PotA;                                                                                                                                                     |
| P | Q97TN5 | CC | H <sup>+</sup> -stimulated, highly selective, manganese uptake system (By similarity).                                                                                                                     |
| P | Q97TN5 | DE | Probable manganese transport protein mntH;                                                                                                                                                                 |

|   |        |    |                                                                                                                                                                                                            |
|---|--------|----|------------------------------------------------------------------------------------------------------------------------------------------------------------------------------------------------------------|
| P | Q97UU7 | DE | Copper-transporting ATPase;                                                                                                                                                                                |
| P | Q97UU7 | DR | copper-exporting ATPase activity                                                                                                                                                                           |
| P | Q97VH4 | DR | copper-exporting ATPase activity                                                                                                                                                                           |
| P | Q97ZC2 | DE | Maltose transport inner membrane protein;                                                                                                                                                                  |
| P | Q97ZT9 | CC | Part of the ABC transporter complex PstSACB involved in phosphate import                                                                                                                                   |
| P | Q97ZT9 | DE | ABC phosphate transporter;                                                                                                                                                                                 |
| P | Q97ZT9 | DE | Phosphate import ATP-binding protein PstB;                                                                                                                                                                 |
| P | Q97ZT9 | DE | Phosphate-transporting ATPase;                                                                                                                                                                             |
| P | Q97ZT9 | DR | phosphate transmembrane-transporting ATPase activity                                                                                                                                                       |
| P | Q987E7 | CC | Part of the ABC transporter complex RbsABCD involved in ribose import                                                                                                                                      |
| P | Q987E7 | DE | Ribose import ATP-binding protein RbsA 2;                                                                                                                                                                  |
| P | Q98C38 | CC | Na <sup>+</sup> /H <sup>+</sup> antiporter that extrudes sodium in exchange for external protons (By similarity)                                                                                           |
| P | Q98C38 | DE | Na <sup>+</sup> /H <sup>+</sup> antiporter nhaA;                                                                                                                                                           |
| P | Q98C38 | DE | Sodium/proton antiporter nhaA;                                                                                                                                                                             |
| P | Q98DW6 | CC | Part of the ABC transporter complex TauABC involved in taurine import                                                                                                                                      |
| P | Q98DW6 | DE | Taurine import ATP-binding protein TauB;                                                                                                                                                                   |
| P | Q98DW6 | DR | taurine-transporting ATPase activity                                                                                                                                                                       |
| P | Q98EA4 | CC | Part of the ABC transporter complex CcmAB involved in the biogenesis of c-type cytochromes; once thought to export heme, this seems not to be the case, but its exact role is uncertain                    |
| P | Q98EA4 | DE | Heme exporter protein A;                                                                                                                                                                                   |
| P | Q98EA4 | DR | heme-transporting ATPase activity                                                                                                                                                                          |
| P | Q98FA5 | CC | Part of the ABC transporter complex ThiBPQ involved in thiamine import                                                                                                                                     |
| P | Q98FA5 | DE | Thiamine import ATP-binding protein ThiQ;                                                                                                                                                                  |
| P | Q98FL2 | CC | Part of the ABC transporter complex pstSACB involved in phosphate import (By similarity).                                                                                                                  |
| P | Q98FL2 | DE | Phosphate-binding protein pstS;                                                                                                                                                                            |
| P | Q98FL2 | DR | inorganic phosphate transmembrane transporter activity                                                                                                                                                     |
| P | Q98FL3 | CC | Part of a binding-protein-dependent transport system for phosphate; probably responsible for the translocation of the substrate across the membrane (By similarity)                                        |
| P | Q98FL3 | DE | Phosphate transport system permease protein pstC;                                                                                                                                                          |
| P | Q98FL3 | DR | inorganic phosphate transmembrane transporter activity                                                                                                                                                     |
| P | Q98FL4 | CC | Part of a binding-protein-dependent transport system for phosphate; probably responsible for the translocation of the substrate across the membrane (By similarity)                                        |
| P | Q98FL4 | DE | Phosphate transport system permease protein pstA;                                                                                                                                                          |
| P | Q98FL4 | DR | inorganic phosphate transmembrane transporter activity                                                                                                                                                     |
| P | Q98FL5 | CC | Part of the ABC transporter complex PstSACB involved in phosphate import                                                                                                                                   |
| P | Q98FL5 | DE | ABC phosphate transporter;                                                                                                                                                                                 |
| P | Q98FL5 | DE | Phosphate import ATP-binding protein PstB;                                                                                                                                                                 |
| P | Q98FL5 | DE | Phosphate-transporting ATPase;                                                                                                                                                                             |
| P | Q98FL5 | DR | inorganic phosphate transmembrane transporter activity                                                                                                                                                     |
| P | Q98FL5 | DR | phosphate transmembrane-transporting ATPase activity                                                                                                                                                       |
| P | Q98G42 | DR | glycerol-3-phosphate-transporting ATPase activity                                                                                                                                                          |
| P | Q98GF5 | DR | phosphonate transmembrane-transporting ATPase activity                                                                                                                                                     |
| P | Q98GX5 | CC | One of the components of the high-affinity ATP-driven potassium transport (or KDP) system, which catalyzes the hydrolysis of ATP coupled with the exchange of hydrogen and potassium ions (By similarity). |
| P | Q98GX5 | DE | Potassium-binding and translocating subunit A;                                                                                                                                                             |
| P | Q98GX5 | DE | Potassium-translocating ATPase A chain;                                                                                                                                                                    |
| P | Q98GX5 | DE | Potassium-transporting ATPase A chain;                                                                                                                                                                     |
| P | Q98GX5 | DR | potassium-transporting ATPase activity                                                                                                                                                                     |
| P | Q98GX6 | CC | One of the components of the high-affinity ATP-driven potassium transport (or KDP) system, which catalyzes the hydrolysis of ATP coupled with the exchange of hydrogen and potassium ions (By similarity). |
| P | Q98GX6 | DE | Potassium-binding and translocating subunit B;                                                                                                                                                             |
| P | Q98GX6 | DE | Potassium-translocating ATPase B chain;                                                                                                                                                                    |
| P | Q98GX6 | DE | Potassium-transporting ATPase B chain;                                                                                                                                                                     |
| P | Q98GX6 | DR | potassium-transporting ATPase activity                                                                                                                                                                     |
| P | Q98GX7 | CC | One of the components of the high-affinity ATP-driven potassium transport (or KDP) system, which catalyzes the hydrolysis of ATP coupled with the exchange of hydrogen and potassium ions                  |
| P | Q98GX7 | DE | Potassium-binding and translocating subunit C;                                                                                                                                                             |
| P | Q98GX7 | DE | Potassium-translocating ATPase C chain;                                                                                                                                                                    |
| P | Q98GX7 | DE | Potassium-transporting ATPase C chain;                                                                                                                                                                     |
| P | Q98GX7 | DR | potassium-transporting ATPase activity                                                                                                                                                                     |

|   |        |    |                                                                                        |
|---|--------|----|----------------------------------------------------------------------------------------|
| P | Q98HF7 | CC | part of the ABC transporter complex PotABCD involved in                                |
| P | Q98HF7 | CC | part of the ABC transporter complex PotABCD involved in                                |
| P | Q98HF7 | DE | spermidine/putrescine import                                                           |
| P | Q98HF7 | DE | Spermidine/putrescine import ATP-binding protein PotA;                                 |
| P | Q98I99 | CC | H <sup>+</sup> -stimulated, highly selective, manganese uptake system (By similarity). |
| P | Q98I99 | DE | Probable manganese transport protein mntH;                                             |
| P | Q98K15 | CC | Part of the ABC transporter complex RbsABCD involved in ribose import                  |
| P | Q98K15 | DE | Ribose import ATP-binding protein RbsA 1;                                              |
| P | Q98K23 | CC | part of the ABC transporter complex CysAW 1F involved in sulfate/inosulfate            |
| P | Q98K23 | DE | import                                                                                 |
| P | Q98K23 | DE | Sulfate-transporting ATPase;                                                           |
| P | Q98K23 | DE | Sulfate/thiosulfate import ATP-binding protein CysA;                                   |
| P | Q98K23 | DR | sulfate transmembrane-transporting ATPase activity                                     |
| P | Q98KI3 | CC | Part of the ABC transporter complex ModABC involved in molybdenum import               |
| P | Q98KI3 | DE | Molybdenum import ATP-binding protein ModC;                                            |
| P | Q98KI3 | DR | molybdenum ion transmembrane transporter activity                                      |
| P | Q98KL7 | CC | Transport of potassium into the cell (By similarity).                                  |
| P | Q98KL7 | DE | Probable potassium transport system protein kup 2;                                     |
| P | Q98KL7 | DR | potassium ion transmembrane transporter activity                                       |
| P | Q98KL8 | CC | Transport of potassium into the cell (By similarity).                                  |
| P | Q98KL8 | DE | Probable potassium transport system protein kup 1;                                     |
| P | Q98KL8 | DR | potassium ion transmembrane transporter activity                                       |
| P | Q98L75 | CC | Part of the ABC transporter complex HmuTUV involved in hemin import                    |
| P | Q98L75 | DE | Hemin import ATP-binding protein HmuV;                                                 |
| P | Q98QE1 | CC | part of the ABC transporter complex PotABCD involved in                                |
| P | Q98QE1 | CC | part of the ABC transporter complex PotABCD involved in                                |
| P | Q98QE1 | DE | spermidine/putrescine import                                                           |
| P | Q98QE1 | DE | Spermidine/putrescine import ATP-binding protein PotA;                                 |
| P | Q98QE1 | DE | Spermidine/putrescine import ATP-binding protein PotA;                                 |
| P | Q99246 | CC | Long-lasting (L-type) calcium channels belong to the 'high-voltage activated'          |
| P | Q99246 | CC | (HVA) group                                                                            |
| P | Q99246 | CC | The isoform alpha-1D gives rise to L-type calcium currents                             |
| P | Q99246 | CC | Voltage-sensitive calcium channels (VSCC) mediate the entry of calcium ions            |
| P | Q99246 | CC | into excitable cells and are also involved in a variety of calcium-dependent           |
| P | Q99246 | CC | processes, including muscle contraction, hormone or neurotransmitter release,          |
| P | Q99246 | CC | gene expression, cell motility, cell division and cell death                           |
| P | Q99246 | DE | Calcium channel, L type, alpha-1 polypeptide isoform 2;                                |
| P | Q99246 | DE | Voltage-dependent L-type calcium channel subunit alpha-1D;                             |
| P | Q99246 | DE | Voltage-gated calcium channel subunit alpha Cav1.3;                                    |
| P | Q99246 | DR | high voltage-gated calcium channel activity                                            |
| P | Q99250 | CC | Assuming opened or closed conformations in response to the voltage difference          |
| P | Q99250 | CC | across the membrane, the protein forms a sodium-selective channel through              |
| P | Q99250 | CC | which Na <sup>+</sup> ions may pass in accordance with their electrochemical gradient. |
| P | Q99250 | CC | Mediates the voltage-dependent sodium ion permeability of excitable membranes          |
| P | Q99250 | DE | Sodium channel protein brain II subunit alpha;                                         |
| P | Q99250 | DE | Sodium channel protein type 2 subunit alpha;                                           |
| P | Q99250 | DE | Sodium channel protein type II subunit alpha;                                          |
| P | Q99250 | DE | Voltage-gated sodium channel subunit alpha Nav1.2;                                     |
| P | Q99250 | DR | voltage-gated sodium channel activity                                                  |
| P | Q99271 | CC | Sodium export from cell, takes up external protons in exchange for internal            |
| P | Q99271 | CC | sodium ions (By similarity).                                                           |
| P | Q99271 | DE | Na <sup>+</sup> /H <sup>+</sup> antiporter;                                            |
| P | Q99271 | DE | Na <sup>+</sup> /H <sup>+</sup> antiporter;                                            |
| P | Q99271 | DR | sodium:hydrogen antiporter activity                                                    |
| P | Q99385 | CC | Has a role in promoting intracellular calcium ion sequestration via the exchange       |
| P | Q99385 | CC | of calcium ions for hydrogen ions across the vacuolar membrane                         |
| P | Q99385 | CC | Involved also in manganese ion homeostasis via its uptake into the vacuole.            |
| P | Q99385 | DE | High copy number undoes manganese protein 1;                                           |
| P | Q99385 | DE | Manganese resistance 1 protein;                                                        |
| P | Q99385 | DE | Vacuolar Ca <sup>2+</sup> /H <sup>+</sup> exchanger;                                   |
| P | Q99385 | DE | Vacuolar Ca <sup>2+</sup> /H <sup>+</sup> exchanger;                                   |
| P | Q99385 | DE | Vacuolar calcium ion transporter;                                                      |
| P | Q99385 | DR | calcium:hydrogen antiporter activity                                                   |
| P | Q99712 | CC | Inward rectifier potassium channels are characterized by a greater tendency to         |
| P | Q99712 | CC | allow potassium to flow into the cell rather than out of it                            |

|   |        |    |                                                                                                                                                                                                          |
|---|--------|----|----------------------------------------------------------------------------------------------------------------------------------------------------------------------------------------------------------|
| P | Q99712 | CC | Their voltage dependence is regulated by the concentration of extracellular potassium; as external potassium is raised, the voltage range of the channel opening shifts to more positive voltages        |
| P | Q99712 | DE | ATP-sensitive inward rectifier potassium channel 15;                                                                                                                                                     |
| P | Q99712 | DE | Inward rectifier K+ channel Kir1.3;                                                                                                                                                                      |
| P | Q99712 | DE | Inward rectifier K+ channel Kir4.2;                                                                                                                                                                      |
| P | Q99712 | DE | Potassium channel, inwardly rectifying subfamily J member 15;                                                                                                                                            |
| P | Q99712 | DR | inward rectifier potassium channel activity                                                                                                                                                              |
| P | Q99726 | CC | Involved in accumulation of zinc in synaptic vesicles (By similarity).                                                                                                                                   |
| P | Q99726 | DE | Zinc transporter 3;                                                                                                                                                                                      |
| P | Q99726 | DR | zinc transporting ATPase activity                                                                                                                                                                        |
| P | Q99808 | DE | Equilibrative NBMPR-sensitive nucleoside transporter;                                                                                                                                                    |
| P | Q99808 | DE | Equilibrative nucleoside transporter 1;                                                                                                                                                                  |
| P | Q99808 | DE | Equilibrative nucleoside transporter 1;                                                                                                                                                                  |
| P | Q99808 | DE | Nucleoside transporter, es-type;                                                                                                                                                                         |
| P | Q99808 | DR | nucleoside transmembrane transporter activity                                                                                                                                                            |
| P | Q99884 | CC | Terminates the action of proline by its high affinity sodium-dependent reuptake into presynaptic terminals.                                                                                              |
| P | Q99884 | CC | Terminates the action of proline by its high affinity sodium-dependent reuptake into presynaptic terminals.                                                                                              |
| P | Q99884 | DE | Sodium-dependent proline transporter;                                                                                                                                                                    |
| P | Q99884 | DE | Sodium-dependent proline transporter;                                                                                                                                                                    |
| P | Q99884 | DR | neurotransmitter:sodium symporter activity                                                                                                                                                               |
| P | Q99884 | DR | proline:sodium symporter activity                                                                                                                                                                        |
| P | Q99884 | DR | proline:sodium symporter activity                                                                                                                                                                        |
| P | Q99928 | CC | GABA, the major inhibitory neurotransmitter in the vertebrate brain, mediates neuronal inhibition by binding to the GABA/benzodiazepine receptor and opening an integral chloride channel.               |
| P | Q99928 | DR | chloride channel activity                                                                                                                                                                                |
| P | Q99J27 | CC | Probable acetyl-CoA transporter necessary for O- acetylation of gangliosides.                                                                                                                            |
| P | Q99J27 | DE | Acetyl-CoA transporter 1;                                                                                                                                                                                |
| P | Q99K24 | DE | Zinc transporter ZIP3;                                                                                                                                                                                   |
| P | Q99K24 | DR | zinc ion transmembrane transporter activity                                                                                                                                                              |
| P | Q99P65 | DE | Equilibrative nucleoside transporter 3;                                                                                                                                                                  |
| P | Q99PE8 | CC | Transporter that appears to play an indispensable role in the selective transport of the dietary cholesterol in and out of the enterocytes and in the selective sterol excretion by the liver into bile. |
| P | Q99PL8 | CC | mediates high affinity thiamine uptake, probably via a proton anti-transport mechanism                                                                                                                   |
| P | Q99PL8 | DE | Thiamine transporter 2;                                                                                                                                                                                  |
| P | Q99PL8 | DR | thiamine uptake transmembrane transporter activity                                                                                                                                                       |
| P | Q99S77 | CC | This system is involved in lactose transport.                                                                                                                                                            |
| P | Q99S77 | DE | Lactose permease IIC component;                                                                                                                                                                          |
| P | Q99S77 | DE | Lactose-specific phosphotransferase enzyme IIB component;                                                                                                                                                |
| P | Q99S77 | DE | PTS system lactose-specific EIIB component;                                                                                                                                                              |
| P | Q99S77 | DE | PTS system lactose-specific EIIC component;                                                                                                                                                              |
| P | Q99S77 | DE | PTS system lactose-specific EIICB component;                                                                                                                                                             |
| P | Q99UZ7 | CC | H+-stimulated, highly selective, manganese uptake system (By similarity).                                                                                                                                |
| P | Q99UZ7 | DE | Probable manganese transport protein mntH;                                                                                                                                                               |
| P | Q99Z39 | CC | Transport of potassium into the cell (By similarity).                                                                                                                                                    |
| P | Q99Z39 | DE | Probable potassium transport system protein kup;                                                                                                                                                         |
| P | Q99Z39 | DR | potassium ion transmembrane transporter activity                                                                                                                                                         |
| P | Q99ZS8 | CC | Part of the ABC transporter complex POTABCD involved in spermidine/putrescine import                                                                                                                     |
| P | Q99ZS8 | DE | Spermidine/putrescine import ATP-binding protein PotA;                                                                                                                                                   |
| P | Q9A0L9 | CC | Part of the ATP-driven transport system AdcABC for zinc.                                                                                                                                                 |
| P | Q9A0L9 | DE | Zinc-binding protein AdcA;                                                                                                                                                                               |
| P | Q9A1E0 | CC | Involved in the import of serine and threonine into the cell, with the concomitant import of sodium (symport system) (By similarity).                                                                    |
| P | Q9A1E0 | DE | Na+/serine-threonine symporter;                                                                                                                                                                          |
| P | Q9A1E0 | DR | sodium:dicarboxylate symporter activity                                                                                                                                                                  |
| P | Q9A1E0 | DR | sodium:dicarboxylate symporter activity                                                                                                                                                                  |
| P | Q9A1H0 | DE | Putative glutamine-binding periplasmic protein;                                                                                                                                                          |
| P | Q9A298 | CC | Part of the ABC transporter complex CcmAB involved in the biogenesis of c-type cytochromes; once thought to export heme, this seems not to be the case, but its exact role is uncertain                  |
| P | Q9A298 | DE | Heme exporter protein A;                                                                                                                                                                                 |

|   |        |    |                                                                                                                                                                                                            |
|---|--------|----|------------------------------------------------------------------------------------------------------------------------------------------------------------------------------------------------------------|
| P | Q9A298 | DR | heme-transporting ATPase activity                                                                                                                                                                          |
| P | Q9A502 | CC | Part of the ABC transporter complex MetNIQ involved in methionine import                                                                                                                                   |
| P | Q9A502 | DE | Methionine import ATP-binding protein MetN;                                                                                                                                                                |
| P | Q9A6Z7 | DE | Lipoprotein-releasing system ATP-binding protein LolD 2;                                                                                                                                                   |
| P | Q9A6Z7 | DR | lipoprotein transporter activity                                                                                                                                                                           |
| P | Q9A7X1 | CC | Part of the ABC transporter complex CysAW 1F involved in sulfate/sulfonate import                                                                                                                          |
| P | Q9A7X1 | DE | Sulfate-transporting ATPase;                                                                                                                                                                               |
| P | Q9A7X1 | DE | Sulfate/thiosulfate import ATP-binding protein CysA;                                                                                                                                                       |
| P | Q9A7X1 | DR | sulfate transmembrane-transporting ATPase activity                                                                                                                                                         |
| P | Q9A7X6 | CC | One of the components of the high-affinity ATP-driven potassium transport (or KDP) system, which catalyzes the hydrolysis of ATP coupled with the exchange of hydrogen and potassium ions                  |
| P | Q9A7X6 | DE | Potassium-binding and translocating subunit C;                                                                                                                                                             |
| P | Q9A7X6 | DE | Potassium-translocating ATPase C chain;                                                                                                                                                                    |
| P | Q9A7X6 | DE | Potassium-transporting ATPase C chain;                                                                                                                                                                     |
| P | Q9A7X6 | DR | potassium-transporting ATPase activity                                                                                                                                                                     |
| P | Q9A7X7 | CC | One of the components of the high-affinity ATP-driven potassium transport (or KDP) system, which catalyzes the hydrolysis of ATP coupled with the exchange of hydrogen and potassium ions (By similarity). |
| P | Q9A7X7 | DE | Potassium-binding and translocating subunit B;                                                                                                                                                             |
| P | Q9A7X7 | DE | Potassium-translocating ATPase B chain;                                                                                                                                                                    |
| P | Q9A7X7 | DE | Potassium-transporting ATPase B chain;                                                                                                                                                                     |
| P | Q9A7X7 | DR | potassium-transporting ATPase activity                                                                                                                                                                     |
| P | Q9A7X8 | CC | One of the components of the high-affinity ATP-driven potassium transport (or KDP) system, which catalyzes the hydrolysis of ATP coupled with the exchange of hydrogen and potassium ions (By similarity). |
| P | Q9A7X8 | DE | Potassium-binding and translocating subunit A;                                                                                                                                                             |
| P | Q9A7X8 | DE | Potassium-translocating ATPase A chain;                                                                                                                                                                    |
| P | Q9A7X8 | DE | Potassium-transporting ATPase A chain;                                                                                                                                                                     |
| P | Q9A7X8 | DR | potassium-transporting ATPase activity                                                                                                                                                                     |
| P | Q9A9P4 | DE | Lipoprotein-releasing system ATP-binding protein LolD 1;                                                                                                                                                   |
| P | Q9A9P4 | DR | lipoprotein transporter activity                                                                                                                                                                           |
| P | Q9AAZ2 | CC | Na <sup>+</sup> /H <sup>+</sup> antiporter that excludes sodium in exchange for external protons (By similarity)                                                                                           |
| P | Q9AAZ2 | DE | Na <sup>+</sup> /H <sup>+</sup> antiporter nhaA;                                                                                                                                                           |
| P | Q9AAZ2 | DE | Sodium/proton antiporter nhaA;                                                                                                                                                                             |
| P | Q9AB70 | DR | phosphonate transmembrane-transporting ATPase activity                                                                                                                                                     |
| P | Q9ABT9 | CC | Transport of potassium into the cell (By similarity).                                                                                                                                                      |
| P | Q9ABT9 | DE | Probable potassium transport system protein kup;                                                                                                                                                           |
| P | Q9ABT9 | DR | potassium ion transmembrane transporter activity                                                                                                                                                           |
| P | Q9ASI1 | CC | Aquaporins facilitate the transport of water and small neutral solutes across cell membranes (By similarity).                                                                                              |
| P | Q9AUK4 | CC | Magnesium transporter that may mediate the influx of magnesium in chloroplast (By similarity).                                                                                                             |
| P | Q9AUK4 | DE | Magnesium transporter MRS2-A, chloroplastic;                                                                                                                                                               |
| P | Q9BQ31 | CC | Potassium channel subunit                                                                                                                                                                                  |
| P | Q9BQ31 | DE | Delayed-rectifier K <sup>+</sup> channel alpha subunit 3;                                                                                                                                                  |
| P | Q9BQ31 | DE | Potassium voltage-gated channel subfamily S member 3;                                                                                                                                                      |
| P | Q9BQ31 | DE | Voltage-gated potassium channel subunit Kv9.3;                                                                                                                                                             |
| P | Q9BQ31 | DR | delayed rectifier potassium channel activity                                                                                                                                                               |
| P | Q9BQ31 | DR | potassium channel regulator activity                                                                                                                                                                       |
| P | Q9BRI3 | DE | Zinc transporter 2;                                                                                                                                                                                        |
| P | Q9BRY0 | DE | Zinc transporter ZIP3;                                                                                                                                                                                     |
| P | Q9BRY0 | DR | zinc ion transmembrane transporter activity                                                                                                                                                                |
| P | Q9BV35 | CC | May act as a ATP-Mg/Pi exchanger that mediates the transport of Mg-ATP in exchange for phosphate, catalyzing the net uptake or efflux of adenine nucleotides into or from the mitochondria.                |
| P | Q9BX84 | CC | Crucial for magnesium homeostasis                                                                                                                                                                          |
| P | Q9BX84 | CC | Has an important role in epithelial magnesium transport and in the active magnesium absorption in the gut and kidney                                                                                       |
| P | Q9BXI2 | CC | Ornithine transport across inner mitochondrial membrane, from the cytoplasm to the matrix.                                                                                                                 |
| P | Q9BXI2 | DE | Mitochondrial ornithine transporter 2;                                                                                                                                                                     |
| P | Q9BXP2 | DR | cation:chloride symporter activity                                                                                                                                                                         |
| P | Q9BY07 | CC | May play a role in mediating Na <sup>+</sup> :HCO <sub>3</sub> <sup>-</sup> cotransport in hepatocytes and intrahepatic cholangiocytes                                                                     |



|   |        |    |                                                                                                                                                                                         |
|---|--------|----|-----------------------------------------------------------------------------------------------------------------------------------------------------------------------------------------|
| P | Q9BY07 | CC | Mediates sodium- and bicarbonate-dependent electrogenic sodium bicarbonate cotransport, with a Na <sup>+</sup> :HCO <sub>3</sub> <sup>-</sup> stoichiometry of 2:1                      |
| P | Q9BY07 | CC | Mediates sodium- and bicarbonate-dependent electrogenic sodium bicarbonate cotransport, with a Na <sup>+</sup> :HCO <sub>3</sub> <sup>-</sup> stoichiometry of 2:1                      |
| P | Q9BY07 | DR | sodium:bicarbonate symporter activity                                                                                                                                                   |
| P | Q9BY07 | DR | sodium:bicarbonate symporter activity                                                                                                                                                   |
| P | Q9BYW1 | CC | Facilitative glucose transporter (By similarity).                                                                                                                                       |
| P | Q9BYW1 | DE | Glucose transporter type 10;                                                                                                                                                            |
| P | Q9BYW1 | DE | Glucose transporter type 11;                                                                                                                                                            |
| P | Q9BYW1 | DE | Solute carrier family 2, facilitated glucose transporter member 11;                                                                                                                     |
| P | Q9BZW2 | CC | Sodium/sulfate cotransporter that mediates sulfate reabsorption in the kidney.                                                                                                          |
| P | Q9BZW2 | CC | Sodium/sulfate cotransporter that mediates sulfate reabsorption in the kidney.                                                                                                          |
| P | Q9BZW2 | DE | Na <sup>+</sup> /sulfate cotransporter;                                                                                                                                                 |
| P | Q9BZW2 | DE | Na <sup>+</sup> /sulfate cotransporter;                                                                                                                                                 |
| P | Q9BZW2 | DE | Renal sodium/sulfate cotransporter;                                                                                                                                                     |
| P | Q9BZW2 | DE | Renal sodium/sulfate cotransporter;                                                                                                                                                     |
| P | Q9BZW2 | DR | sodium:sulfate symporter activity                                                                                                                                                       |
| P | Q9BZW2 | DR | sodium:sulfate symporter activity                                                                                                                                                       |
| P | Q9C007 | DE | Voltage-gated sodium channel alpha subunit splice variant SCN3A-s;                                                                                                                      |
| P | Q9C007 | DR | voltage-gated sodium channel activity                                                                                                                                                   |
| P | Q9C0K1 | DE | LIV-1 subfamily of ZIP zinc transporter 6;                                                                                                                                              |
| P | Q9C0K1 | DE | Zinc transporter ZIP8;                                                                                                                                                                  |
| P | Q9C0K1 | DR | zinc ion transmembrane transporter activity                                                                                                                                             |
| P | Q9C6B2 | DE | Metal transporter Nramp2;                                                                                                                                                               |
| P | Q9C6T0 | CC | Aquaporins facilitate the transport of water and small neutral solutes across cell membranes (By similarity).                                                                           |
| P | Q9C8G9 | CC | Pump for glutathione S-conjugates                                                                                                                                                       |
| P | Q9C8G9 | DE | ATP-energized glutathione S-conjugate pump 1;                                                                                                                                           |
| P | Q9C8G9 | DE | Glutathione S-conjugate-transporting ATPase 1;                                                                                                                                          |
| P | Q9C8T1 | CC | Part of the ABC transporter complex CcmAB involved in the biogenesis of c-type cytochromes; once thought to export heme, this seems not to be the case, but its exact role is uncertain |
| P | Q9C8T1 | DR | heme-transporting ATPase activity                                                                                                                                                       |
| P | Q9C8X2 | CC | Responsible for the transport of sucrose into the cell, with the concomitant uptake of protons (symport system)                                                                         |
| P | Q9C8X2 | DE | Sucrose permease 5;                                                                                                                                                                     |
| P | Q9C8X2 | DE | Sucrose transport protein SUC5;                                                                                                                                                         |
| P | Q9C8X2 | DE | Sucrose-proton symporter 5;                                                                                                                                                             |
| P | Q9C8X2 | DR | sucrose transmembrane transporter activity                                                                                                                                              |
| P | Q9CBE5 | CC | Part of the ABC transporter complex pstSACB involved in phosphate import (By similarity).                                                                                               |
| P | Q9CBE5 | DE | Phosphate-binding protein pstS 3;                                                                                                                                                       |
| P | Q9CBE5 | DR | inorganic phosphate transmembrane transporter activity                                                                                                                                  |
| P | Q9CE02 | CC | Mixed channel protein that transports both water and glycerol (By similarity).                                                                                                          |
| P | Q9CE02 | DE | Glycerol facilitator-aquaporin gla;                                                                                                                                                     |
| P | Q9CEK0 | CC | This protein is a component of the oligopeptide permease, a binding protein-dependent transport system, it binds peptides up to five amino acids long with high affinity.               |
| P | Q9CEK0 | DE | Oligopeptide-binding protein oppA;                                                                                                                                                      |
| P | Q9CEW7 | CC | Part of the ABC transporter complex PstSACB involved in phosphate import                                                                                                                |
| P | Q9CEW7 | DE | ABC phosphate transporter 2;                                                                                                                                                            |
| P | Q9CEW7 | DE | Phosphate import ATP-binding protein PstB 2;                                                                                                                                            |
| P | Q9CEW7 | DE | Phosphate-transporting ATPase 2;                                                                                                                                                        |
| P | Q9CEW7 | DR | inorganic phosphate transmembrane transporter activity                                                                                                                                  |
| P | Q9CEW7 | DR | phosphate transmembrane-transporting ATPase activity                                                                                                                                    |
| P | Q9CEW8 | CC | Part of the ABC transporter complex PstSACB involved in phosphate import                                                                                                                |
| P | Q9CEW8 | DE | ABC phosphate transporter 1;                                                                                                                                                            |
| P | Q9CEW8 | DE | Phosphate import ATP-binding protein PstB 1;                                                                                                                                            |
| P | Q9CEW8 | DE | Phosphate-transporting ATPase 1;                                                                                                                                                        |
| P | Q9CEW8 | DR | inorganic phosphate transmembrane transporter activity                                                                                                                                  |
| P | Q9CEW8 | DR | phosphate transmembrane-transporting ATPase activity                                                                                                                                    |
| P | Q9CFZ5 | CC | Part of an ATP-driven transport system for a metal; probably for manganese.                                                                                                             |
| P | Q9CG19 | CC | Involved in glutamate-dependent acid resistance                                                                                                                                         |
| P | Q9CG19 | CC | may be involved in antiport of glutamate and glutamate-gamma-aminobutyrate (GABA)                                                                                                       |
| P | Q9CG19 | DE | Glutamate/gamma-aminobutyrate antiporter;                                                                                                                                               |
| P | Q9CGD4 | CC | part of the ABC transporter complex PstABCD involved in                                                                                                                                 |
|   |        |    | carbamides/antagonists import                                                                                                                                                           |

|   |        |    |                                                                                                                                                                     |
|---|--------|----|---------------------------------------------------------------------------------------------------------------------------------------------------------------------|
| P | Q9CGD4 | CC | part of the ABC transporter complex PotABCD involved in spermidine/putrescine import                                                                                |
| P | Q9CGD4 | DE | Spermidine/putrescine import ATP-binding protein PotA;                                                                                                              |
| P | Q9CGD4 | DE | Spermidine/putrescine import ATP-binding protein PotA;                                                                                                              |
| P | Q9CHU4 | CC | Transport of potassium into the cell (By similarity).                                                                                                               |
| P | Q9CHU4 | DE | Probable potassium transport system protein kup 2;                                                                                                                  |
| P | Q9CHU4 | DR | potassium ion transmembrane transporter activity                                                                                                                    |
| P | Q9CHU5 | CC | Transport of potassium into the cell (By similarity).                                                                                                               |
| P | Q9CHU5 | DE | Probable potassium transport system protein kup 1;                                                                                                                  |
| P | Q9CHU5 | DR | potassium ion transmembrane transporter activity                                                                                                                    |
| P | Q9CJZ2 | CC | This system is involved in sucrose transport (By similarity).                                                                                                       |
| P | Q9CJZ2 | DE | PTS system sucrose-specific EIIB component;                                                                                                                         |
| P | Q9CJZ2 | DE | PTS system sucrose-specific EIIBC component;                                                                                                                        |
| P | Q9CJZ2 | DE | PTS system sucrose-specific EIIC component;                                                                                                                         |
| P | Q9CJZ2 | DE | Sucrose permease IIC component;                                                                                                                                     |
| P | Q9CJZ2 | DE | Sucrose-specific phosphotransferase enzyme IIB component;                                                                                                           |
| P | Q9CKD8 | CC | Na <sup>+</sup> /H <sup>+</sup> antiporter that extrudes sodium in exchange for external protons (By similarity)                                                    |
| P | Q9CKD8 | DE | Na <sup>+</sup> /H <sup>+</sup> antiporter nhaA;                                                                                                                    |
| P | Q9CKD8 | DE | Sodium/proton antiporter nhaA;                                                                                                                                      |
| P | Q9CL63 | CC | Part of the ABC transporter complex RbsABCD involved in ribose import                                                                                               |
| P | Q9CL63 | DE | Ribose import ATP-binding protein RbsA 2;                                                                                                                           |
| P | Q9CLC4 | CC | Mediates influx of magnesium ions (By similarity).                                                                                                                  |
| P | Q9CLC4 | DE | Magnesium transport protein CorA;                                                                                                                                   |
| P | Q9CLC4 | DR | cobalt ion transmembrane transporter activity                                                                                                                       |
| P | Q9CLC4 | DR | magnesium ion transmembrane transporter activity                                                                                                                    |
| P | Q9CLY8 | CC | This system is involved in mannitol transport (By similarity).                                                                                                      |
| P | Q9CLY8 | DE | Mannitol permease IIC component;                                                                                                                                    |
| P | Q9CLY8 | DE | Mannitol-specific phosphotransferase enzyme IIA component;                                                                                                          |
| P | Q9CLY8 | DE | Mannitol-specific phosphotransferase enzyme IIB component;                                                                                                          |
| P | Q9CLY8 | DE | PTS system mannitol-specific EIIA component;                                                                                                                        |
| P | Q9CLY8 | DE | PTS system mannitol-specific EIIB component;                                                                                                                        |
| P | Q9CLY8 | DE | PTS system mannitol-specific EIIC component;                                                                                                                        |
| P | Q9CLY8 | DE | PTS system mannitol-specific EIICBA component;                                                                                                                      |
| P | Q9CM08 | CC | Part of the ABC transporter complex MglABC involved in galactose/methyl galactoside import                                                                          |
| P | Q9CM08 | DE | Galactose/methyl galactoside import ATP-binding protein MglA;                                                                                                       |
| P | Q9CMD9 | CC | Involved in the import of serine and threonine into the cell, with the concomitant import of sodium (symport system) (By similarity).                               |
| P | Q9CMD9 | DE | Na <sup>+</sup> /serine-threonine symporter;                                                                                                                        |
| P | Q9CMD9 | DR | sodium:dicarboxylate symporter activity                                                                                                                             |
| P | Q9CMD9 | DR | sodium:dicarboxylate symporter activity                                                                                                                             |
| P | Q9CMS0 | CC | Part of the ABC transporter complex ModABC involved in molybdenum import                                                                                            |
| P | Q9CMS0 | DE | Molybdenum import ATP-binding protein ModC;                                                                                                                         |
| P | Q9CMS0 | DR | molybdenum ion transmembrane transporter activity                                                                                                                   |
| P | Q9CNJ4 | CC | Part of the ABC transporter complex pstSACB involved in phosphate import (By similarity).                                                                           |
| P | Q9CNJ4 | DE | Phosphate-binding protein pstS;                                                                                                                                     |
| P | Q9CNJ4 | DR | inorganic phosphate transmembrane transporter activity                                                                                                              |
| P | Q9CNJ5 | CC | part of a binding-protein-dependent transport system for phosphate; probably responsible for the translocation of the substrate across the membrane (By similarity) |
| P | Q9CNJ5 | DE | Phosphate transport system permease protein pstC;                                                                                                                   |
| P | Q9CNJ5 | DR | inorganic phosphate transmembrane transporter activity                                                                                                              |
| P | Q9CNJ6 | CC | part of a binding-protein-dependent transport system for phosphate; probably responsible for the translocation of the substrate across the membrane (By similarity) |
| P | Q9CNJ6 | DE | Phosphate transport system permease protein pstA;                                                                                                                   |
| P | Q9CNJ6 | DR | inorganic phosphate transmembrane transporter activity                                                                                                              |
| P | Q9CNJ7 | CC | Part of the ABC transporter complex PstSACB involved in phosphate import                                                                                            |
| P | Q9CNJ7 | DE | ABC phosphate transporter;                                                                                                                                          |
| P | Q9CNJ7 | DE | Phosphate import ATP-binding protein PstB;                                                                                                                          |
| P | Q9CNJ7 | DE | Phosphate-transporting ATPase;                                                                                                                                      |
| P | Q9CNJ7 | DR | inorganic phosphate transmembrane transporter activity                                                                                                              |
| P | Q9CNJ7 | DR | phosphate transmembrane-transporting ATPase activity                                                                                                                |
| P | Q9CNP9 | CC | Part of the ABC transporter complex ThiBPQ involved in thiamine import                                                                                              |
| P | Q9CNP9 | DE | Thiamine import ATP-binding protein ThiQ;                                                                                                                           |
| P | Q9CP06 | CC | part of the ABC transporter complex PotABCD involved in spermidine/putrescine import                                                                                |
| P | Q9CP06 | CC | part of the ABC transporter complex PotABCD involved in spermidine/putrescine import                                                                                |

|   |        |    |                                                                                                                                                                                                                                                                                                                                                                               |
|---|--------|----|-------------------------------------------------------------------------------------------------------------------------------------------------------------------------------------------------------------------------------------------------------------------------------------------------------------------------------------------------------------------------------|
| P | Q9CP06 | DE | Spermidine/putrescine import ATP-binding protein PotA;                                                                                                                                                                                                                                                                                                                        |
| P | Q9CP06 | DE | Spermidine/putrescine import ATP-binding protein PotA;                                                                                                                                                                                                                                                                                                                        |
| P | Q9CP24 | CC | Part of the ABC transporter complex ZnuABC involved in zinc import                                                                                                                                                                                                                                                                                                            |
| P | Q9CP24 | DE | Zinc import ATP-binding protein ZnuC;                                                                                                                                                                                                                                                                                                                                         |
| P | Q9CP24 | DR | zinc transporting ATPase activity                                                                                                                                                                                                                                                                                                                                             |
| P | Q9CP98 | CC | Part of the ABC transporter complex RbsABCD involved in ribose import                                                                                                                                                                                                                                                                                                         |
| P | Q9CP98 | DE | Ribose import ATP-binding protein RbsA 1;                                                                                                                                                                                                                                                                                                                                     |
| P | Q9CPJ1 | CC | Na <sup>+</sup> /H <sup>+</sup> antiporter that excludes sodium in exchange for external protons (By similarity)                                                                                                                                                                                                                                                              |
| P | Q9CPJ1 | DE | Na <sup>+</sup> /H <sup>+</sup> antiporter nhaB;                                                                                                                                                                                                                                                                                                                              |
| P | Q9CPJ1 | DE | Sodium/proton antiporter nhaB;                                                                                                                                                                                                                                                                                                                                                |
| P | Q9CPJ1 | DR | sodium:hydrogen antiporter activity                                                                                                                                                                                                                                                                                                                                           |
| P | Q9CPL9 | CC | Transport of uracil in the cell (By similarity).                                                                                                                                                                                                                                                                                                                              |
| P | Q9CPL9 | DE | Probable uracil permease;                                                                                                                                                                                                                                                                                                                                                     |
| P | Q9CPL9 | DE | Uracil transporter;                                                                                                                                                                                                                                                                                                                                                           |
| P | Q9CPN2 | CC | Part of the ABC transporter complex CcmAB involved in the biogenesis of c-type cytochromes; once thought to export heme, this seems not to be the case, but its exact role is uncertain                                                                                                                                                                                       |
| P | Q9CPN2 | DE | Heme exporter protein A;                                                                                                                                                                                                                                                                                                                                                      |
| P | Q9CPN2 | DR | heme-transporting ATPase activity                                                                                                                                                                                                                                                                                                                                             |
| P | Q9CPU9 | CC | Involved in low-affinity copper uptake (Potential).                                                                                                                                                                                                                                                                                                                           |
| P | Q9CPU9 | DE | Copper transporter 2;                                                                                                                                                                                                                                                                                                                                                         |
| P | Q9CPU9 | DE | Probable low affinity copper uptake protein 2;                                                                                                                                                                                                                                                                                                                                |
| P | Q9CPU9 | DR | copper ion transmembrane transporter activity                                                                                                                                                                                                                                                                                                                                 |
| P | Q9CR62 | CC | Catalyzes the transport of 2-oxoglutarate across the inner mitochondrial membrane in an electroneutral exchange for malate or other dicarboxylic acids, and plays an important role in several metabolic processes, including the malate-aspartate shuttle, the oxoglutarate/isocitrate shuttle, in gluconeogenesis from lactate, and in nitrogen metabolism (By similarity). |
| P | Q9CR62 | CC | Catalyzes the transport of 2-oxoglutarate across the inner mitochondrial membrane in an electroneutral exchange for malate or other dicarboxylic acids, and plays an important role in several metabolic processes, including the malate-aspartate shuttle, the oxoglutarate/isocitrate shuttle, in gluconeogenesis from lactate, and in nitrogen metabolism (By similarity). |
| P | Q9CR62 | DE | Mitochondrial 2-oxoglutarate/malate carrier protein;                                                                                                                                                                                                                                                                                                                          |
| P | Q9CR62 | DE | Mitochondrial 2-oxoglutarate/malate carrier protein;                                                                                                                                                                                                                                                                                                                          |
| P | Q9CXB2 | CC | Transports sulfoconjugated steroid hormones, as well as taurochenodeoxychic acid-3-sulfate and sulfoconjugated pyrenes in a sodium-dependent manner (By similarity)                                                                                                                                                                                                           |
| P | Q9CXB2 | DE | Sodium-dependent organic anion transporter;                                                                                                                                                                                                                                                                                                                                   |
| P | Q9CXB2 | DR | bile acid:sodium symporter activity                                                                                                                                                                                                                                                                                                                                           |
| P | Q9CXB2 | DR | bile acid:sodium symporter activity                                                                                                                                                                                                                                                                                                                                           |
| P | Q9D321 | DR | sugar:hydrogen symporter activity                                                                                                                                                                                                                                                                                                                                             |
| P | Q9D687 | CC | Uptake of leucine is sodium- dependent                                                                                                                                                                                                                                                                                                                                        |
| P | Q9D687 | DE | Sodium-dependent neutral amino acid transporter B(0)AT1;                                                                                                                                                                                                                                                                                                                      |
| P | Q9D687 | DR | neurotransmitter:sodium symporter activity                                                                                                                                                                                                                                                                                                                                    |
| P | Q9D6F4 | CC | GABA, the major inhibitory neurotransmitter in the vertebrate brain, mediates neuronal inhibition by binding to the GABA/benzodiazepine receptor and opening an integral chloride channel.                                                                                                                                                                                    |
| P | Q9D6F4 | DR | chloride channel activity                                                                                                                                                                                                                                                                                                                                                     |
| P | Q9D6M3 | CC | Glutamate is cotransported with H <sup>+</sup> (By similarity).                                                                                                                                                                                                                                                                                                               |
| P | Q9D6M3 | CC | Involved in the transport of glutamate across the inner mitochondrial membrane                                                                                                                                                                                                                                                                                                |
| P | Q9D6M3 | DE | Glutamate/H <sup>+</sup> symporter 1;                                                                                                                                                                                                                                                                                                                                         |
| P | Q9D6M3 | DE | Mitochondrial glutamate carrier 1;                                                                                                                                                                                                                                                                                                                                            |
| P | Q9D6M3 | DR | L-glutamate transmembrane transporter activity                                                                                                                                                                                                                                                                                                                                |
| P | Q9D7P7 | CC | Can insert into membranes and form chloride ion channels                                                                                                                                                                                                                                                                                                                      |
| P | Q9D7P7 | DE | Chloride intracellular channel protein 3;                                                                                                                                                                                                                                                                                                                                     |
| P | Q9D7P7 | DR | voltage-gated chloride channel activity                                                                                                                                                                                                                                                                                                                                       |
| P | Q9D856 | CC | may play a role in polarized cells by carrying out serosal-to-mucosal zinc transport                                                                                                                                                                                                                                                                                          |
| P | Q9D856 | CC | Seems to play a central role in controlling organismal zinc status.                                                                                                                                                                                                                                                                                                           |
| P | Q9D856 | DE | Zinc transporter ZIP5;                                                                                                                                                                                                                                                                                                                                                        |
| P | Q9D856 | DR | zinc ion transmembrane transporter activity                                                                                                                                                                                                                                                                                                                                   |
| P | Q9DB41 | CC | Glutamate is cotransported with H <sup>+</sup> (By similarity).                                                                                                                                                                                                                                                                                                               |
| P | Q9DB41 | CC | Involved in the transport of glutamate across the inner mitochondrial membrane                                                                                                                                                                                                                                                                                                |
| P | Q9DB41 | DE | Glutamate/H <sup>+</sup> symporter 2;                                                                                                                                                                                                                                                                                                                                         |
| P | Q9DB41 | DE | Mitochondrial glutamate carrier 2;                                                                                                                                                                                                                                                                                                                                            |
| P | Q9DBP0 | CC | it may be the main phosphate transport protein in the intestinal brush border membrane                                                                                                                                                                                                                                                                                        |

|   |        |    |                                                                                                                                                                                                                                               |
|---|--------|----|-----------------------------------------------------------------------------------------------------------------------------------------------------------------------------------------------------------------------------------------------|
| P | Q9DBP0 | CC | May be involved in actively transporting phosphate into cells via Na <sup>+</sup> cotransport                                                                                                                                                 |
| P | Q9DBP0 | CC | May be involved in actively transporting phosphate into cells via Na <sup>+</sup> cotransport                                                                                                                                                 |
| P | Q9DBP0 | DE | Na <sup>+</sup> -dependent phosphate cotransporter 2B;                                                                                                                                                                                        |
| P | Q9DBP0 | DE | Na <sup>+</sup> -dependent phosphate cotransporter 2B;                                                                                                                                                                                        |
| P | Q9DBP0 | DE | Na <sup>+</sup> /Pi cotransporter 2B;                                                                                                                                                                                                         |
| P | Q9DBP0 | DE | Sodium-dependent phosphate transport protein 2B;                                                                                                                                                                                              |
| P | Q9DBP0 | DE | Sodium-dependent phosphate transport protein 2B;                                                                                                                                                                                              |
| P | Q9DBP0 | DE | Sodium-phosphate transport protein 2B;                                                                                                                                                                                                        |
| P | Q9DBP0 | DE | Sodium/phosphate cotransporter 2B;                                                                                                                                                                                                            |
| P | Q9DBP0 | DE | Sodium/phosphate cotransporter 2B;                                                                                                                                                                                                            |
| P | Q9DBP0 | DR | sodium-dependent phosphate transmembrane transporter activity                                                                                                                                                                                 |
| P | Q9DBP0 | DR | sodium-dependent phosphate transmembrane transporter activity                                                                                                                                                                                 |
| P | Q9EPR4 | CC | Mediates electrogenic uptake of vitamin C, with a stoichiometry of 2 Na <sup>+</sup> for each ascorbate (By similarity).                                                                                                                      |
| P | Q9EPR4 | CC | Mediates electrogenic uptake of vitamin C, with a stoichiometry of 2 Na <sup>+</sup> for each ascorbate (By similarity).                                                                                                                      |
| P | Q9EPR4 | CC | Sodium/ascorbate cotransporter                                                                                                                                                                                                                |
| P | Q9EPR4 | CC | Sodium/ascorbate cotransporter                                                                                                                                                                                                                |
| P | Q9EPR4 | DE | Na <sup>+</sup> /L-ascorbic acid transporter 2;                                                                                                                                                                                               |
| P | Q9EPR4 | DE | Na <sup>+</sup> /L-ascorbic acid transporter 2;                                                                                                                                                                                               |
| P | Q9EPR4 | DE | Sodium-dependent vitamin C transporter 2;                                                                                                                                                                                                     |
| P | Q9EPR4 | DE | Sodium-dependent vitamin C transporter 2;                                                                                                                                                                                                     |
| P | Q9EPR4 | DR | L-ascorbate:sodium symporter activity                                                                                                                                                                                                         |
| P | Q9EPR4 | DR | L-ascorbate:sodium symporter activity                                                                                                                                                                                                         |
| P | Q9EQJ0 | CC | Nicotinic acid adenine dinucleotide phosphate (NAADP) receptor that may function as one of the major voltage-gated Ca <sup>2+</sup> channels (VDCC) across the lysosomal and endosomal membrane (By similarity).                              |
| P | Q9EQJ0 | DE | Two pore calcium channel protein 1;                                                                                                                                                                                                           |
| P | Q9EQJ0 | DE | Voltage-dependent calcium channel protein TPC1;                                                                                                                                                                                               |
| P | Q9EQJ0 | DR | calcium channel activity                                                                                                                                                                                                                      |
| P | Q9EQR3 | CC | forms a voltage-independent potassium channel activated by intracellular calcium                                                                                                                                                              |
| P | Q9ER60 | CC | Assuming opened or closed conformations in response to the voltage difference across the membrane, the protein forms a sodium-selective channel through which Na <sup>+</sup> ions may pass in accordance with their electrochemical gradient |
| P | Q9ER60 | CC | This protein mediates the voltage-dependent sodium ion permeability of excitable membranes                                                                                                                                                    |
| P | Q9ER60 | CC | This sodium channel may be present in both denervated and innervated skeletal muscles                                                                                                                                                         |
| P | Q9ER60 | DE | Sodium channel protein skeletal muscle subunit alpha;                                                                                                                                                                                         |
| P | Q9ER60 | DE | Sodium channel protein type 4 subunit alpha;                                                                                                                                                                                                  |
| P | Q9ER60 | DE | Sodium channel protein type IV subunit alpha;                                                                                                                                                                                                 |
| P | Q9ER60 | DE | Voltage-gated sodium channel subunit alpha Nav1.4;                                                                                                                                                                                            |
| P | Q9ER60 | DR | voltage-gated sodium channel activity                                                                                                                                                                                                         |
| P | Q9ES88 | CC | Cotransport of sodium ions and dicarboxylates such as succinate and citrate.                                                                                                                                                                  |
| P | Q9ES88 | DE | Na <sup>+</sup> /dicarboxylate cotransporter 1;                                                                                                                                                                                               |
| P | Q9ES88 | DE | Na <sup>+</sup> /dicarboxylate cotransporter 1;                                                                                                                                                                                               |
| P | Q9ES88 | DE | Renal sodium/dicarboxylate cotransporter;                                                                                                                                                                                                     |
| P | Q9ES88 | DE | Renal sodium/dicarboxylate cotransporter;                                                                                                                                                                                                     |
| P | Q9EYM2 | DE | Lipoprotein-releasing system ATP-binding protein LolD;                                                                                                                                                                                        |
| P | Q9EYM2 | DR | lipoprotein transporter activity                                                                                                                                                                                                              |
| P | Q9FE38 | CC | High-affinity potassium transporter required for tip growth of root hairs.                                                                                                                                                                    |
| P | Q9FE38 | DE | Potassium transporter 3;                                                                                                                                                                                                                      |
| P | Q9FE38 | DR | potassium ion transmembrane transporter activity                                                                                                                                                                                              |
| P | Q9FE59 | CC | Responsible for the transport of sucrose into the cell, with the concomitant uptake of protons (symport system)                                                                                                                               |
| P | Q9FE59 | DE | Sucrose permease 4;                                                                                                                                                                                                                           |
| P | Q9FE59 | DE | Sucrose transport protein SUC4;                                                                                                                                                                                                               |
| P | Q9FE59 | DE | Sucrose transporter 4;                                                                                                                                                                                                                        |
| P | Q9FE59 | DE | Sucrose-proton symporter 4;                                                                                                                                                                                                                   |
| P | Q9FE59 | DR | sucrose transmembrane transporter activity                                                                                                                                                                                                    |
| P | Q9FEP7 | CC | High-affinity H <sup>+</sup> /sulfate cotransporter that mediates the loading of sulfate into the sieve tube                                                                                                                                  |
| P | Q9FEP7 | CC | Plays a central role in the regulation of sulfate assimilation.                                                                                                                                                                               |
| P | Q9FEP7 | DE | Sulfate transporter 1.3;                                                                                                                                                                                                                      |
| P | Q9FEP7 | DR | secondary active sulfate transmembrane transporter activity                                                                                                                                                                                   |

|   |        |    |                                                                                                                                   |
|---|--------|----|-----------------------------------------------------------------------------------------------------------------------------------|
| P | Q9FF53 | CC | Aquaporins facilitate the transport of water and small neutral solutes across cell membranes (By similarity).                     |
| P | Q9FG00 | CC | High-affinity sucrose transporter                                                                                                 |
| P | Q9FG00 | CC | Responsible for the transport of sucrose into the cell, with the concomitant uptake of protons (symport system)                   |
| P | Q9FG00 | DE | Sucrose permease 9;                                                                                                               |
| P | Q9FG00 | DE | Sucrose transport protein SUC9;                                                                                                   |
| P | Q9FG00 | DE | Sucrose-proton symporter 9;                                                                                                       |
| P | Q9FG00 | DR | sucrose transmembrane transporter activity                                                                                        |
| P | Q9FG72 | DE | Oligopeptide transporter 1;                                                                                                       |
| P | Q9FG72 | DR | oligopeptide transporter activity                                                                                                 |
| P | Q9FIS2 | CC | Probably mediates zinc uptake from the rhizosphere (By similarity).                                                               |
| P | Q9FIS2 | DE | Probable zinc transporter 12;                                                                                                     |
| P | Q9FIS2 | DR | zinc ion transmembrane transporter activity                                                                                       |
| P | Q9FIZ9 | CC | Potential aquaporin, which may facilitate the transport of water and small neutral solutes across cell membranes (By similarity). |
| P | Q9FJD1 | DE | Oligopeptide transporter 8;                                                                                                       |
| P | Q9FJD2 | DE | Oligopeptide transporter 9;                                                                                                       |
| P | Q9FK43 | CC | Water channel required to facilitate the transport of water across cell membrane.                                                 |
| P | Q9FK43 | DR | water channel activity                                                                                                            |
| P | Q9FL25 | CC | Calcium-activated outward rectifying potassium channel                                                                            |
| P | Q9FL25 | DE | Probable calcium-activated outward-rectifying potassium channel 2;                                                                |
| P | Q9FL25 | DR | potassium channel activity                                                                                                        |
| P | Q9FLG2 | CC | Low-affinity magnesium transporter that mediates the influx of magnesium                                                          |
| P | Q9FLG2 | DE | Magnesium Transporter 9;                                                                                                          |
| P | Q9FLG2 | DE | Magnesium transporter MRS2-2;                                                                                                     |
| P | Q9FLG2 | DR | magnesium ion transmembrane transporter activity                                                                                  |
| P | Q9FME8 | DE | Oligopeptide transporter 4;                                                                                                       |
| P | Q9FME8 | DR | oligopeptide transporter activity                                                                                                 |
| P | Q9FMX3 | CC | Can transport glucose, galactose, mannose, xylose and 3-O-methylglucose, but not fructose and ribose.                             |
| P | Q9FMX3 | DE | Hexose transporter 11;                                                                                                            |
| P | Q9FN18 | CC | Regulates metal accumulation under Fe starvation                                                                                  |
| P | Q9FN18 | CC | Vacuolar metal transporter involved in intracellular metal homeostasis                                                            |
| P | Q9FN18 | DE | Metal transporter Nramp4;                                                                                                         |
| P | Q9FWV6 | CC | Aquaporins facilitate the transport of water and small neutral solutes across cell membranes                                      |
| P | Q9FWX6 | CC | Outward rectifying potassium channel                                                                                              |
| P | Q9FWX6 | DE | Outward-rectifying potassium channel 4;                                                                                           |
| P | Q9FWX6 | DE | Two-pore potassium channel 4;                                                                                                     |
| P | Q9FWX6 | DR | potassium channel activity                                                                                                        |
| P | Q9FY46 | CC | Na <sup>+</sup> /sulfate cotransporter that may play a role in the regulation of sulfate assimilation                             |
| P | Q9FY46 | DE | Sulfate transporter 4.1, chloroplastic;                                                                                           |
| P | Q9FY46 | DR | secondary active sulfate transmembrane transporter activity                                                                       |
| P | Q9FY75 | CC | Probable potassium transporter.                                                                                                   |
| P | Q9FY75 | DE | Potassium transporter 7;                                                                                                          |
| P | Q9FY75 | DR | potassium ion transmembrane transporter activity                                                                                  |
| P | Q9GZN6 | DE | Orphan sodium- and chloride-dependent neurotransmitter transporter NTT5;                                                          |
| P | Q9GZN6 | DR | neurotransmitter:sodium symporter activity                                                                                        |
| P | Q9GZV3 | CC | Choline uptake is the rate-limiting step in acetylcholine synthesis                                                               |
| P | Q9GZV3 | CC | Imports choline from the extracellular space to the neuron with high affinity                                                     |
| P | Q9GZV3 | CC | Sodium ion- and chloride ion- dependent.                                                                                          |
| P | Q9GZV3 | DE | Hemicholinium-3-sensitive choline transporter;                                                                                    |
| P | Q9GZV3 | DE | High affinity choline transporter 1;                                                                                              |
| P | Q9GZV3 | DR | choline:sodium symporter activity                                                                                                 |
| P | Q9GZV3 | DR | choline:sodium symporter activity                                                                                                 |
| P | Q9H015 | CC | Also transports organic cations such as tetraethylammonium (TEA) without the involvement of sodium                                |
| P | Q9H015 | CC | Probably transports one sodium ion with one molecule of carnitine                                                                 |
| P | Q9H015 | CC | Probably transports one sodium ion with one molecule of carnitine                                                                 |
| P | Q9H015 | CC | Relative uptake activity ratio of carnitine to TEA is 1.78                                                                        |
| P | Q9H015 | CC | Sodium-ion dependent, low affinity carnitine transporter                                                                          |
| P | Q9H015 | CC | Sodium-ion dependent, low affinity carnitine transporter                                                                          |
| P | Q9H015 | DE | Organic cation/carnitine transporter 1;                                                                                           |
| P | Q9H015 | DR | carnitine transporter activity                                                                                                    |

|   |        |    |                                                                                                                                                                                                          |
|---|--------|----|----------------------------------------------------------------------------------------------------------------------------------------------------------------------------------------------------------|
| P | Q9H0C2 | CC | Catalyzes the exchange of ADP and ATP across the mitochondrial inner membrane                                                                                                                            |
| P | Q9H0C2 | CC | Catalyzes the exchange of ADP and ATP across the mitochondrial inner membrane                                                                                                                            |
| P | Q9H0C2 | DE | ADP/ATP carrier protein 4;                                                                                                                                                                               |
| P | Q9H0C2 | DE | ADP/ATP translocase 4;                                                                                                                                                                                   |
| P | Q9H0C2 | DE | ADP/ATP translocase 4;                                                                                                                                                                                   |
| P | Q9H1D0 | CC | Calcium selective cation channel probably involved in Ca <sup>2+</sup> uptake in various tissues, including Ca <sup>2+</sup> reabsorption in intestine                                                   |
| P | Q9H1D0 | CC | inactivation includes both, a rapid Ca <sup>2+</sup> -dependent and a slower Ca <sup>2+</sup> -calmodulin- dependent mechanism, the latter may be regulated by                                           |
| P | Q9H1D0 | CC | The channel is activated by low internal calcium level, probably including intracellular calcium store depletion, and the current exhibits an inward rectification                                       |
| P | Q9H1D0 | DE | Calcium transport protein 1;                                                                                                                                                                             |
| P | Q9H1D0 | DE | Epithelial calcium channel 2;                                                                                                                                                                            |
| P | Q9H1D0 | DR | calcium channel activity                                                                                                                                                                                 |
| P | Q9H1K4 | CC | Glutamate is cotransported with H <sup>+</sup> .                                                                                                                                                         |
| P | Q9H1K4 | CC | Involved in the transport of glutamate across the inner mitochondrial membrane                                                                                                                           |
| P | Q9H1K4 | DE | Glutamate/H <sup>+</sup> symporter 2;                                                                                                                                                                    |
| P | Q9H1K4 | DE | Mitochondrial glutamate carrier 2;                                                                                                                                                                       |
| P | Q9H1V8 | DE | Sodium-dependent neurotransmitter transporter NTT4;                                                                                                                                                      |
| P | Q9H1V8 | DE | Sodium-dependent neutral amino acid transporter SLC6A17;                                                                                                                                                 |
| P | Q9H1V8 | DR | neurotransmitter:sodium symporter activity                                                                                                                                                               |
| P | Q9H221 | CC | Transporter that appears to play an indispensable role in the selective transport of the dietary cholesterol in and out of the enterocytes and in the selective sterol excretion by the liver into bile. |
| P | Q9H222 | CC | Transporter that appears to play an indispensable role in the selective transport of the dietary cholesterol in and out of the enterocytes and in the selective sterol excretion by the liver into bile. |
| P | Q9H252 | CC | Pore-forming (alpha) subunit of voltage-gated potassium channel                                                                                                                                          |
| P | Q9H252 | DE | Ether-a-go-go-related gene potassium channel 2;                                                                                                                                                          |
| P | Q9H252 | DE | Potassium voltage-gated channel subfamily H member 6;                                                                                                                                                    |
| P | Q9H252 | DE | Voltage-gated potassium channel subunit Kv11.2;                                                                                                                                                          |
| P | Q9H2B4 | CC | High affinity uptake of sulfate                                                                                                                                                                          |
| P | Q9H2B4 | DE | Sulfate anion transporter 1;                                                                                                                                                                             |
| P | Q9H2B4 | DR | secondary active sulfate transmembrane transporter activity                                                                                                                                              |
| P | Q9H2D1 | CC | Transports folate across the inner membranes of mitochondria.                                                                                                                                            |
| P | Q9H2D1 | DE | Mitochondrial folate transporter/carrier;                                                                                                                                                                |
| P | Q9H2D1 | DR | folic acid transporter activity                                                                                                                                                                          |
| P | Q9H2J7 | CC | Mediates the saturable, pH-sensitive and electrogenic cotransport of proline and sodium ions with a stoichiometry of 1:1                                                                                 |
| P | Q9H2J7 | DE | Sodium- and chloride-dependent neurotransmitter transporter NTT73;                                                                                                                                       |
| P | Q9H2J7 | DE | Sodium-coupled branched-chain amino-acid transporter 1;                                                                                                                                                  |
| P | Q9H2J7 | DE | Sodium-dependent neutral amino acid transporter B(0)AT2;                                                                                                                                                 |
| P | Q9H2J7 | DR | neurotransmitter:sodium symporter activity                                                                                                                                                               |
| P | Q9H2S1 | CC | forms a voltage-independent potassium channel activated by intracellular calcium                                                                                                                         |
| P | Q9H2X9 | CC | Mediates electroneutral potassium-chloride cotransport in mature neurons                                                                                                                                 |
| P | Q9H2X9 | DE | Electroneutral potassium-chloride cotransporter 2;                                                                                                                                                       |
| P | Q9H2X9 | DR | potassium:chloride symporter activity                                                                                                                                                                    |
| P | Q9H2X9 | DR | potassium:chloride symporter activity                                                                                                                                                                    |
| P | Q9H3M0 | CC | Putative voltage-gated potassium channel.                                                                                                                                                                |
| P | Q9H3M0 | DE | Potassium voltage-gated channel subfamily F member 1;                                                                                                                                                    |
| P | Q9H3M0 | DE | Voltage-gated potassium channel subunit Kv5.1;                                                                                                                                                           |
| P | Q9H3M0 | DR | voltage-gated potassium channel activity                                                                                                                                                                 |
| P | Q9H427 | CC | Probable potassium channel subunit                                                                                                                                                                       |
| P | Q9H427 | DE | Acid-sensitive potassium channel protein TASK-5;                                                                                                                                                         |
| P | Q9H427 | DE | Potassium channel subfamily K member 15;                                                                                                                                                                 |
| P | Q9H427 | DE | TWIK-related acid-sensitive K <sup>+</sup> channel 5;                                                                                                                                                    |
| P | Q9H427 | DE | Two pore K <sup>+</sup> channel KT3.3;                                                                                                                                                                   |
| P | Q9H427 | DE | Two pore potassium channel KT3.3;                                                                                                                                                                        |
| P | Q9H427 | DR | potassium channel activity                                                                                                                                                                               |
| P | Q9H598 | CC | Involved in the uptake of GABA and glycine into the synaptic vesicles.                                                                                                                                   |
| P | Q9H598 | CC | Involved in the uptake of GABA and glycine into the synaptic vesicles.                                                                                                                                   |
| P | Q9H598 | DE | GABA and glycine transporter;                                                                                                                                                                            |
| P | Q9H598 | DE | GABA and glycine transporter;                                                                                                                                                                            |
| P | Q9H598 | DE | Vesicular GABA transporter;                                                                                                                                                                              |
| P | Q9H936 | CC | Glutamate is cotransported with H <sup>+</sup> .                                                                                                                                                         |

|   |        |    |                                                                                                                                      |
|---|--------|----|--------------------------------------------------------------------------------------------------------------------------------------|
| P | Q9H936 | CC | Involved in the transport of glutamate across the inner mitochondrial membrane                                                       |
| P | Q9H936 | DE | Glutamate/H <sup>+</sup> symporter 1;                                                                                                |
| P | Q9H936 | DE | Mitochondrial glutamate carrier 1;                                                                                                   |
| P | Q9H936 | DR | L-glutamate transmembrane transporter activity                                                                                       |
| P | Q9H9F5 | DR | neurotransmitter:sodium symporter activity                                                                                           |
| P | Q9HB14 | CC | Potassium channel displaying weak inward rectification in symmetrical K <sup>+</sup> solution (By similarity).                       |
| P | Q9HB14 | DE | Potassium channel subfamily K member 13;                                                                                             |
| P | Q9HB14 | DE | Tandem pore domain halothane-inhibited potassium channel 1;                                                                          |
| P | Q9HB14 | DR | potassium channel activity                                                                                                           |
| P | Q9HB15 | CC | Probable potassium channel subunit                                                                                                   |
| P | Q9HB15 | DE | Potassium channel subfamily K member 12;                                                                                             |
| P | Q9HB15 | DE | Tandem pore domain halothane-inhibited potassium channel 2;                                                                          |
| P | Q9HB15 | DR | potassium channel activity                                                                                                           |
| P | Q9HC58 | CC | Transports 1 Ca <sup>2+</sup> and 1 K <sup>+</sup> in exchange for 4 Na <sup>+</sup> (By similarity).                                |
| P | Q9HC58 | CC | Transports 1 Ca <sup>2+</sup> and 1 K <sup>+</sup> in exchange for 4 Na <sup>+</sup> (By similarity).                                |
| P | Q9HC58 | CC | Transports 1 Ca <sup>2+</sup> and 1 K <sup>+</sup> in exchange for 4 Na <sup>+</sup> (By similarity).                                |
| P | Q9HC58 | DE | Na <sup>+</sup> /K <sup>+</sup> /Ca <sup>2+</sup> -exchange protein 3;                                                               |
| P | Q9HC58 | DE | Na <sup>+</sup> /K <sup>+</sup> /Ca <sup>2+</sup> -exchange protein 3;                                                               |
| P | Q9HC58 | DE | Na <sup>+</sup> /K <sup>+</sup> /Ca <sup>2+</sup> -exchange protein 3;                                                               |
| P | Q9HC58 | DE | Sodium/potassium/calcium exchanger 3;                                                                                                |
| P | Q9HC58 | DE | Sodium/potassium/calcium exchanger 3;                                                                                                |
| P | Q9HC58 | DE | Sodium/potassium/calcium exchanger 3;                                                                                                |
| P | Q9HC58 | DR | calcium, potassium:sodium antiporter activity                                                                                        |
| P | Q9HC58 | DR | calcium, potassium:sodium antiporter activity                                                                                        |
| P | Q9HC58 | DR | calcium, potassium:sodium antiporter activity                                                                                        |
| P | Q9HD23 | CC | Magnesium transporter that may mediate the influx of magnesium into the mitochondrial matrix.                                        |
| P | Q9HD23 | DE | Magnesium transporter MRS2 homolog, mitochondrial;                                                                                   |
| P | Q9HFE1 | DE | Low-affinity iron/zinc ion transport protein fet4;                                                                                   |
| P | Q9HML8 | CC | Part of the ABC transporter complex PstSACB involved in phosphate import                                                             |
| P | Q9HML8 | DE | ABC phosphate transporter 2;                                                                                                         |
| P | Q9HML8 | DE | Phosphate import ATP-binding protein PstB 2;                                                                                         |
| P | Q9HML8 | DE | Phosphate-transporting ATPase 2;                                                                                                     |
| P | Q9HML8 | DR | inorganic phosphate transmembrane transporter activity                                                                               |
| P | Q9HML8 | DR | phosphate transmembrane-transporting ATPase activity                                                                                 |
| P | Q9HNI8 | DR | phosphonate transmembrane-transporting ATPase activity                                                                               |
| P | Q9HPH5 | DR | cobalt ion transmembrane transporter activity                                                                                        |
| P | Q9HS13 | CC | Part of the ABC transporter complex PstSACB involved in phosphate import                                                             |
| P | Q9HS13 | DE | ABC phosphate transporter 1;                                                                                                         |
| P | Q9HS13 | DE | Phosphate import ATP-binding protein PstB 1;                                                                                         |
| P | Q9HS13 | DE | Phosphate-transporting ATPase 1;                                                                                                     |
| P | Q9HS13 | DR | inorganic phosphate transmembrane transporter activity                                                                               |
| P | Q9HS13 | DR | phosphate transmembrane-transporting ATPase activity                                                                                 |
| P | Q9HT70 | CC | Part of the ABC transporter complex MetNIQ involved in methionine import                                                             |
| P | Q9HT70 | DE | Methionine import ATP-binding protein MetN 2;                                                                                        |
| P | Q9HT73 | CC | Part of the ABC transporter complex ZnuABC involved in zinc import                                                                   |
| P | Q9HT73 | DE | Zinc import ATP-binding protein ZnuC;                                                                                                |
| P | Q9HT73 | DR | zinc transporting ATPase activity                                                                                                    |
| P | Q9HWR7 | CC | The physiological role may be the reduction of the intracellular concentration of toxic sugars or sugar metabolites (By similarity). |
| P | Q9HWR7 | DE | Probable sugar efflux transporter;                                                                                                   |
| P | Q9HWZ3 | CC | Channel that permits osmotically driven movement of water in both directions                                                         |
| P | Q9HWZ3 | CC | It mediates rapid entry or exit of water in response to abrupt changes in osmolarity (By similarity).                                |
| P | Q9HX79 | CC | Part of the ABC transporter complex TauABC involved in taurine import                                                                |
| P | Q9HX79 | DE | Taurine import ATP-binding protein TauB;                                                                                             |
| P | Q9HX79 | DR | taurine-transporting ATPase activity                                                                                                 |
| P | Q9HY19 | CC | Part of the ABC transporter complex PotABCD involved in spermidine/putrescine import                                                 |
| P | Q9HY19 | CC | Part of the ABC transporter complex PotABCD involved in spermidine/putrescine import                                                 |
| P | Q9HY19 | DE | Spermidine/putrescine import ATP-binding protein PotA 2;                                                                             |
| P | Q9HY19 | DE | Spermidine/putrescine import ATP-binding protein PotA 2;                                                                             |
| P | Q9HYL1 | CC | Involved in copper processing and transport; in the assembly of the copper chromophores of nitrous oxide reductase.                  |
| P | Q9HYL1 | DE | Copper-binding periplasmic protein;                                                                                                  |

|   |        |    |                                                                                                                                                                                         |
|---|--------|----|-----------------------------------------------------------------------------------------------------------------------------------------------------------------------------------------|
| P | Q9HYL7 | DR | phosphonate transmembrane-transporting ATPase activity                                                                                                                                  |
| P | Q9HYT0 | DR | phosphonate transmembrane-transporting ATPase activity                                                                                                                                  |
| P | Q9HZL7 | DE | Lipoprotein-releasing system ATP-binding protein LolD;                                                                                                                                  |
| P | Q9HZL7 | DR | lipoprotein transporter activity                                                                                                                                                        |
| P | Q9HZS1 | CC | Part of the binding-protein-dependent transport system for histidine                                                                                                                    |
| P | Q9HZS1 | DE | Histidine transport ATP-binding protein HisP;                                                                                                                                           |
| P | Q9I1C8 | CC | Part of the ABC transporter complex MetNIQ involved in methionine import                                                                                                                |
| P | Q9I1C8 | DE | Methionine import ATP-binding protein MetN 1;                                                                                                                                           |
| P | Q9I273 | CC | Involved in the import of serine and threonine into the cell, with the concomitant import of sodium (symport system) (By similarity).                                                   |
| P | Q9I273 | DE | Na <sup>+</sup> /serine-threonine symporter;                                                                                                                                            |
| P | Q9I273 | DR | sodium:dicarboxylate symporter activity                                                                                                                                                 |
| P | Q9I273 | DR | sodium:dicarboxylate symporter activity                                                                                                                                                 |
| P | Q9I2N4 | CC | Part of the ABC transporter complex ModABC involved in molybdenum import                                                                                                                |
| P | Q9I2N4 | DE | Molybdenum import ATP-binding protein ModC;                                                                                                                                             |
| P | Q9I2N4 | DR | molybdenum ion transmembrane transporter activity                                                                                                                                       |
| P | Q9I2S5 | CC | Na <sup>+</sup> /H <sup>+</sup> antiporter that extrudes sodium in exchange for external protons                                                                                        |
| P | Q9I2S5 | DE | Na <sup>+</sup> /H <sup>+</sup> antiporter nhaB;                                                                                                                                        |
| P | Q9I2S5 | DE | Sodium/proton antiporter nhaB;                                                                                                                                                          |
| P | Q9I2S5 | DR | sodium:hydrogen antiporter activity                                                                                                                                                     |
| P | Q9I3N5 | CC | Required for the export of heme to the periplasm for the biogenesis of c-type cytochromes (By similarity).                                                                              |
| P | Q9I3N5 | DE | Heme exporter protein C;                                                                                                                                                                |
| P | Q9I3N5 | DR | heme transporter activity                                                                                                                                                               |
| P | Q9I3N6 | CC | Required for the export of heme to the periplasm for the biogenesis of c-type cytochromes (By similarity).                                                                              |
| P | Q9I3N6 | DE | Heme exporter protein B;                                                                                                                                                                |
| P | Q9I3N6 | DR | heme transporter activity                                                                                                                                                               |
| P | Q9I3N7 | CC | Part of the ABC transporter complex CcmAB involved in the biogenesis of c-type cytochromes; once thought to export heme, this seems not to be the case, but its exact role is uncertain |
| P | Q9I3N7 | DE | Heme exporter protein A;                                                                                                                                                                |
| P | Q9I3N7 | DR | heme-transporting ATPase activity                                                                                                                                                       |
| P | Q9I3Y3 | CC | Confers resistance to benzalkonium chloride, fluoroquinolones, ethidium bromide, acriflavine and tetraphenylphosphonium chloride.                                                       |
| P | Q9I540 | CC | Transport of potassium into the cell (By similarity).                                                                                                                                   |
| P | Q9I540 | DE | Probable potassium transport system protein kup;                                                                                                                                        |
| P | Q9I540 | DR | potassium ion transmembrane transporter activity                                                                                                                                        |
| P | Q9I6L0 | CC | Part of the ABC transporter complex CysAW 1F involved in sulfate/thiosulfate import                                                                                                     |
| P | Q9I6L0 | DE | Sulfate-transporting ATPase;                                                                                                                                                            |
| P | Q9I6L0 | DE | Sulfate/thiosulfate import ATP-binding protein CysA;                                                                                                                                    |
| P | Q9I6L0 | DR | sulfate transmembrane-transporting ATPase activity                                                                                                                                      |
| P | Q9I6Q3 | CC | Transporter for 4-hydroxybenzoate                                                                                                                                                       |
| P | Q9I6Q3 | DE | 4-hydroxybenzoate transporter;                                                                                                                                                          |
| P | Q9I6T2 | CC | Part of the ABC transporter complex PotABCD involved in spermidine/putrescine import                                                                                                    |
| P | Q9I6T2 | CC | Part of the ABC transporter complex PotABCD involved in spermidine/putrescine import                                                                                                    |
| P | Q9I6T2 | DE | Spermidine/putrescine import ATP-binding protein PotA 1;                                                                                                                                |
| P | Q9I6T2 | DE | Spermidine/putrescine import ATP-binding protein PotA 1;                                                                                                                                |
| P | Q9JIF3 | CC | Binds cytochalasin B in a glucose-inhibitable manner                                                                                                                                    |
| P | Q9JIF3 | CC | Insulin-regulated facilitative glucose transporter                                                                                                                                      |
| P | Q9JIF3 | DE | Glucose transporter type 8;                                                                                                                                                             |
| P | Q9JIF3 | DE | Glucose transporter type X1;                                                                                                                                                            |
| P | Q9JIF3 | DE | Solute carrier family 2, facilitated glucose transporter member 8;                                                                                                                      |
| P | Q9JIF3 | DR | glucose transmembrane transporter activity                                                                                                                                              |
| P | Q9JIM1 | DE | Equilibrative NBMPR-sensitive nucleoside transporter;                                                                                                                                   |
| P | Q9JIM1 | DE | Equilibrative nucleoside transporter                                                                                                                                                    |
| P | Q9JIM1 | DE | Equilibrative nucleoside transporter 1;                                                                                                                                                 |
| P | Q9JIM1 | DE | Nucleoside transporter, es-type;                                                                                                                                                        |
| P | Q9JIM1 | DR | nucleoside transmembrane transporter activity                                                                                                                                           |
| P | Q9JIS8 | CC | mediates electroneutral potassium-chloride cotransport when activated by cell swelling                                                                                                  |
| P | Q9JIS8 | DE | Electroneutral potassium-chloride cotransporter 1;                                                                                                                                      |
| P | Q9JIS8 | DR | cation:chloride symporter activity                                                                                                                                                      |
| P | Q9JJC8 | CC | Acts as a selective Mg <sup>2+</sup> transporter.                                                                                                                                       |
| P | Q9JJC8 | DE | Magnesium transporter NIPA2;                                                                                                                                                            |



|   |        |    |                                                                                                                                                                                                                                                   |
|---|--------|----|---------------------------------------------------------------------------------------------------------------------------------------------------------------------------------------------------------------------------------------------------|
| P | Q9JJV9 | CC | Assuming opened or closed conformations in response to the voltage difference across the membrane, the protein forms a sodium-selective channel through which Na <sup>+</sup> ions may pass in accordance with their electrochemical gradient     |
| P | Q9JJV9 | CC | It is a tetrodotoxin-resistant Na <sup>+</sup> channel isoform.                                                                                                                                                                                   |
| P | Q9JJV9 | CC | This protein mediates the voltage-dependent sodium ion permeability of excitable membranes                                                                                                                                                        |
| P | Q9JJV9 | DE | Sodium channel protein cardiac muscle subunit alpha;                                                                                                                                                                                              |
| P | Q9JJV9 | DE | Sodium channel protein type 5 subunit alpha;                                                                                                                                                                                                      |
| P | Q9JJV9 | DE | Sodium channel protein type V subunit alpha;                                                                                                                                                                                                      |
| P | Q9JJV9 | DE | Voltage-gated sodium channel subunit alpha Nav1.5;                                                                                                                                                                                                |
| P | Q9JJV9 | DR | voltage-gated sodium channel activity                                                                                                                                                                                                             |
| P | Q9JK45 | CC | Associates with KCNQ5 to form a potassium channel which contributes to M-type current, a slowly activating and deactivating potassium conductance which plays a critical role in determining the subthreshold electrical excitability of neurons  |
| P | Q9JK45 | CC | May contribute, with other potassium channels, to the molecular diversity of an heterogeneous population of M-channels, varying in kinetic and pharmacological properties, which underlie this physiologically important current (By similarity). |
| P | Q9JK45 | DE | Potassium channel subunit alpha KvLQT5;                                                                                                                                                                                                           |
| P | Q9JK45 | DE | Potassium voltage-gated channel subfamily KQT member 5;                                                                                                                                                                                           |
| P | Q9JK45 | DE | Voltage-gated potassium channel subunit Kv7.5;                                                                                                                                                                                                    |
| P | Q9JK45 | DR | voltage-gated potassium channel activity                                                                                                                                                                                                          |
| P | Q9JK97 | CC | May underlie a potassium current involved in regulating the excitability of sensory cells of the cochlea.                                                                                                                                         |
| P | Q9JK97 | DE | Potassium channel subunit alpha KvLQT4;                                                                                                                                                                                                           |
| P | Q9JK97 | DE | Potassium voltage-gated channel subfamily KQT member 4;                                                                                                                                                                                           |
| P | Q9JK97 | DE | Voltage-gated potassium channel subunit Kv7.4;                                                                                                                                                                                                    |
| P | Q9JK97 | DR | voltage-gated potassium channel activity                                                                                                                                                                                                          |
| P | Q9JKN1 | CC | Partly regulates cellular zinc homeostasis                                                                                                                                                                                                        |
| P | Q9JKN1 | CC | Required with ZNT5 for the activation of zinc- requiring enzymes, alkaline phosphatases (ALPs)                                                                                                                                                    |
| P | Q9JKN1 | CC | Seems to facilitate zinc transport from the cytoplasm into the Golgi apparatus                                                                                                                                                                    |
| P | Q9JKN1 | CC | Transports zinc into the lumens of the Golgi apparatus and the vesicular compartments where ALPs locate, thus, converting apoALPs to holoALPs                                                                                                     |
| P | Q9JKN1 | DE | Zinc transporter 7;                                                                                                                                                                                                                               |
| P | Q9JKN1 | DR | zinc ion transmembrane transporter activity                                                                                                                                                                                                       |
| P | Q9JLF1 | CC | GABA, the major inhibitory neurotransmitter in the vertebrate brain, mediates neuronal inhibition by binding to the GABA/benzodiazepine receptor and opening an integral chloride channel.                                                        |
| P | Q9JLF1 | DR | chloride channel activity                                                                                                                                                                                                                         |
| P | Q9JM63 | CC | Inward rectifier potassium channels are characterized by a greater tendency to allow potassium to flow into the cell rather than out of it                                                                                                        |
| P | Q9JM63 | CC | May be responsible for potassium buffering action of glial cells in the brain                                                                                                                                                                     |
| P | Q9JM63 | CC | Their voltage dependence is regulated by the concentration of extracellular potassium; as external potassium is raised, the voltage range of the channel opening shifts to more positive voltages                                                 |
| P | Q9JM63 | DE | ATP-sensitive inward rectifier potassium channel 10;                                                                                                                                                                                              |
| P | Q9JM63 | DE | Inward rectifier K <sup>+</sup> channel Kir4.1;                                                                                                                                                                                                   |
| P | Q9JM63 | DE | Potassium channel, inwardly rectifying subfamily J member 10;                                                                                                                                                                                     |
| P | Q9JM63 | DR | inward rectifier potassium channel activity                                                                                                                                                                                                       |
| P | Q9JMA9 | CC | Mediates the uptake of a broad range of neutral and cationic amino acids (with the exception of proline) in a Na <sup>+</sup> /Cl <sup>-</sup> -dependent manner.                                                                                 |
| P | Q9JMA9 | DE | Sodium- and chloride-dependent neutral and basic amino acid transporter B(0+);                                                                                                                                                                    |
| P | Q9JMA9 | DR | neurotransmitter:sodium symporter activity                                                                                                                                                                                                        |
| P | Q9JXB8 | CC | Involved in the import of serine and threonine into the cell, with the concomitant import of sodium (symport system) (By similarity).                                                                                                             |
| P | Q9JXB8 | DE | Na <sup>+</sup> /serine-threonine symporter;                                                                                                                                                                                                      |
| P | Q9JXB8 | DR | sodium:dicarboxylate symporter activity                                                                                                                                                                                                           |
| P | Q9JXB8 | DR | sodium:dicarboxylate symporter activity                                                                                                                                                                                                           |
| P | Q9JZW0 | CC | Part of the ABC transporter complex CysA-W is involved in sulfate/inosinate import                                                                                                                                                                |
| P | Q9JZW0 | DE | Sulfate-transporting ATPase;                                                                                                                                                                                                                      |
| P | Q9JZW0 | DE | Sulfate/thiosulfate import ATP-binding protein CysA;                                                                                                                                                                                              |
| P | Q9JZW0 | DR | sulfate transmembrane-transporting ATPase activity                                                                                                                                                                                                |
| P | Q9K5Z9 | CC | May play a role in L-lactate transport.                                                                                                                                                                                                           |
| P | Q9K5Z9 | DE | L-lactate permease;                                                                                                                                                                                                                               |
| P | Q9K5Z9 | DR | lactate transmembrane transporter activity                                                                                                                                                                                                        |

|   |        |    |                                                                                                                                         |
|---|--------|----|-----------------------------------------------------------------------------------------------------------------------------------------|
| P | Q9K678 | CC | This system is involved in mannitol transport (By similarity).                                                                          |
| P | Q9K678 | DE | Mannitol permease IIC component;                                                                                                        |
| P | Q9K678 | DE | Mannitol-specific phosphotransferase enzyme IIB component;                                                                              |
| P | Q9K678 | DE | PTS system mannitol-specific EIIB component;                                                                                            |
| P | Q9K678 | DE | PTS system mannitol-specific EIIC component;                                                                                            |
| P | Q9K678 | DE | PTS system mannitol-specific EIICB component;                                                                                           |
| P | Q9K680 | CC | This system is involved in mannitol transport (By similarity).                                                                          |
| P | Q9K680 | DE | Mannitol-specific phosphotransferase enzyme IIA component;                                                                              |
| P | Q9K680 | DE | PTS system mannitol-specific EIIA component;                                                                                            |
| P | Q9K6J9 | CC | Part of the ABC transporter complex RbsABCD involved in ribose import                                                                   |
| P | Q9K6J9 | DE | Ribose import ATP-binding protein RbsA;                                                                                                 |
| P | Q9K789 | CC | Part of the ABC transporter complex MetNIQ involved in methionine import                                                                |
| P | Q9K789 | DE | Methionine import ATP-binding protein MetN;                                                                                             |
| P | Q9K876 | CC | Part of the ABC transporter complex CysAWT involved in sulfate/thiosulfate import                                                       |
| P | Q9K876 | DE | Sulfate-transporting ATPase;                                                                                                            |
| P | Q9K876 | DE | Sulfate/thiosulfate import ATP-binding protein CysA;                                                                                    |
| P | Q9K876 | DR | sulfate transmembrane-transporting ATPase activity                                                                                      |
| P | Q9K8L5 | CC | Part of the ABC transporter complex PstSACB involved in phosphate import                                                                |
| P | Q9K8L5 | DE | ABC phosphate transporter;                                                                                                              |
| P | Q9K8L5 | DE | Phosphate import ATP-binding protein PstB;                                                                                              |
| P | Q9K8L5 | DE | Phosphate-transporting ATPase;                                                                                                          |
| P | Q9K8L5 | DR | inorganic phosphate transmembrane transporter activity                                                                                  |
| P | Q9K8L5 | DR | phosphate transmembrane-transporting ATPase activity                                                                                    |
| P | Q9K8N1 | DR | phosphonate transmembrane-transporting ATPase activity                                                                                  |
| P | Q9KCQ4 | CC | This system is involved in glucose transport (By similarity).                                                                           |
| P | Q9KCQ4 | DE | Glucose-specific phosphotransferase enzyme IIA component;                                                                               |
| P | Q9KCQ4 | DE | PTS system glucose-specific EIIA component;                                                                                             |
| P | Q9KD29 | CC | This protein is probably a component of a manganese permease, a binding protein-dependent, ATP-driven transport system (By similarity). |
| P | Q9KD29 | DE | Manganese transport system membrane protein mntC;                                                                                       |
| P | Q9KD30 | CC | This protein is probably a component of a manganese permease, a binding protein-dependent, ATP-driven transport system                  |
| P | Q9KD30 | DE | Manganese transport system ATP-binding protein MntB;                                                                                    |
| P | Q9KEE7 | CC | Part of the binding-protein-dependent transport system for L-arabinose (By similarity)                                                  |
| P | Q9KEE9 | CC | Part of the binding-protein-dependent transport system for L-arabinose                                                                  |
| P | Q9KEE9 | DE | L-arabinose transport system permease protein AraQ;                                                                                     |
| P | Q9KEF0 | CC | Part of the binding-protein-dependent transport system for L-arabinose                                                                  |
| P | Q9KEF0 | DE | L-arabinose transport system permease protein AraP;                                                                                     |
| P | Q9KFG3 | CC | This protein is probably a component of a manganese permease, a binding protein-dependent, ATP-driven transport system (By similarity). |
| P | Q9KFG3 | DE | Manganese-binding lipoprotein mntA;                                                                                                     |
| P | Q9KFL0 | DR | phosphonate transmembrane-transporting ATPase activity                                                                                  |
| P | Q9KFN9 | DR | phosphonate transmembrane-transporting ATPase activity                                                                                  |
| P | Q9KIJ3 | CC | Part of an ATP-driven transport system for a metal; probably for manganese                                                              |
| P | Q9KJ75 | CC | This system is involved in mannitol transport (By similarity).                                                                          |
| P | Q9KJ75 | DE | Mannitol permease IIC component;                                                                                                        |
| P | Q9KJ75 | DE | Mannitol-specific phosphotransferase enzyme IIB component;                                                                              |
| P | Q9KJ75 | DE | PTS system mannitol-specific EIIB component;                                                                                            |
| P | Q9KJ75 | DE | PTS system mannitol-specific EIIC component;                                                                                            |
| P | Q9KJ75 | DE | PTS system mannitol-specific EIICB component;                                                                                           |
| P | Q9KKQ7 | CC | This system is involved in mannitol transport (By similarity).                                                                          |
| P | Q9KKQ7 | DE | Mannitol permease IIC component;                                                                                                        |
| P | Q9KKQ7 | DE | Mannitol-specific phosphotransferase enzyme IIA component;                                                                              |
| P | Q9KKQ7 | DE | Mannitol-specific phosphotransferase enzyme IIB component;                                                                              |
| P | Q9KKQ7 | DE | PTS system mannitol-specific EIIA component;                                                                                            |
| P | Q9KKQ7 | DE | PTS system mannitol-specific EIIB component;                                                                                            |
| P | Q9KKQ7 | DE | PTS system mannitol-specific EIIC component;                                                                                            |
| P | Q9KKQ7 | DE | PTS system mannitol-specific EIICBA component;                                                                                          |
| P | Q9KL04 | CC | Part of the ABC transporter complex MalEFGK involved in maltose/maltodextrin import                                                     |
| P | Q9KL04 | DE | Maltose/maltodextrin import ATP-binding protein MalK;                                                                                   |
| P | Q9KL04 | DR | maltose-transporting ATPase activity                                                                                                    |
| P | Q9KL06 | DE | Maltose transport system permease protein malF;                                                                                         |
| P | Q9KL07 | DE | Maltose transport system permease protein malG;                                                                                         |
| P | Q9KL34 | CC | Part of the ABC transporter complex HmuTUV involved in hemin import                                                                     |
| P | Q9KL34 | DE | Hemin import ATP-binding protein HmuV;                                                                                                  |

|   |        |    |                                                                                                                                                                                         |
|---|--------|----|-----------------------------------------------------------------------------------------------------------------------------------------------------------------------------------------|
| P | Q9KLL9 | CC | Part of the ABC transporter complex ModABC involved in molybdenum import                                                                                                                |
| P | Q9KLL9 | DE | Molybdenum import ATP-binding protein ModC;                                                                                                                                             |
| P | Q9KLL9 | DR | molybdenum ion transmembrane transporter activity                                                                                                                                       |
| P | Q9KM59 | CC | Transport of potassium into the cell (By similarity).                                                                                                                                   |
| P | Q9KM59 | DE | Probable potassium transport system protein kup;                                                                                                                                        |
| P | Q9KM59 | DR | potassium ion transmembrane transporter activity                                                                                                                                        |
| P | Q9KM62 | CC | Functions as antiport system and exchanges two chloride ions for 1 proton                                                                                                               |
| P | Q9KM62 | CC | Proton-coupled chloride transporter                                                                                                                                                     |
| P | Q9KM62 | DR | voltage-gated chloride channel activity                                                                                                                                                 |
| P | Q9KN37 | CC | Part of the ABC transporter complex RbsABCD involved in ribose import                                                                                                                   |
| P | Q9KN37 | DE | Ribose import ATP-binding protein RbsA;                                                                                                                                                 |
| P | Q9KN92 | CC | Part of the ABC transporter complex PstSACB involved in phosphate import                                                                                                                |
| P | Q9KN92 | DE | ABC phosphate transporter 2;                                                                                                                                                            |
| P | Q9KN92 | DE | Phosphate import ATP-binding protein PstB 2;                                                                                                                                            |
| P | Q9KN92 | DE | Phosphate-transporting ATPase 2;                                                                                                                                                        |
| P | Q9KN92 | DR | inorganic phosphate transmembrane transporter activity                                                                                                                                  |
| P | Q9KN92 | DR | phosphate transmembrane-transporting ATPase activity                                                                                                                                    |
| P | Q9KNC9 | CC | Involved in the import of serine and threonine into the cell, with the concomitant import of sodium (symport system) (By similarity).                                                   |
| P | Q9KNC9 | DE | Na <sup>+</sup> /serine-threonine symporter;                                                                                                                                            |
| P | Q9KNC9 | DR | sodium:dicarboxylate symporter activity                                                                                                                                                 |
| P | Q9KNC9 | DR | sodium:dicarboxylate symporter activity                                                                                                                                                 |
| P | Q9KP42 | CC | Part of the ABC transporter complex ThiBPQ involved in thiamine import                                                                                                                  |
| P | Q9KP42 | DE | Thiamine import ATP-binding protein ThiQ;                                                                                                                                               |
| P | Q9KPZ7 | CC | Involved in copper export (By similarity).                                                                                                                                              |
| P | Q9KPZ7 | DE | Copper-exporting P-type ATPase A;                                                                                                                                                       |
| P | Q9KPZ7 | DR | copper-exporting ATPase activity                                                                                                                                                        |
| P | Q9KQB8 | CC | Part of the ABC transporter complex ZnuABC involved in zinc import                                                                                                                      |
| P | Q9KQB8 | DE | Zinc import ATP-binding protein ZnuC;                                                                                                                                                   |
| P | Q9KQB8 | DR | zinc transporting ATPase activity                                                                                                                                                       |
| P | Q9KQE3 | CC | Part of the ABC transporter complex CcmAB involved in the biogenesis of c-type cytochromes; once thought to export heme, this seems not to be the case, but its exact role is uncertain |
| P | Q9KQE3 | DE | Heme exporter protein A;                                                                                                                                                                |
| P | Q9KQE3 | DR | heme-transporting ATPase activity                                                                                                                                                       |
| P | Q9KQU7 | CC | Na <sup>+</sup> /H <sup>+</sup> antiporter that extrudes sodium in exchange for external protons.                                                                                       |
| P | Q9KQU7 | DE | Na <sup>+</sup> /H <sup>+</sup> antiporter nhaB;                                                                                                                                        |
| P | Q9KQU7 | DE | Sodium/proton antiporter nhaB;                                                                                                                                                          |
| P | Q9KQU7 | DR | sodium:hydrogen antiporter activity                                                                                                                                                     |
| P | Q9KRT4 | DR | glycerol-3-phosphate-transporting ATPase activity                                                                                                                                       |
| P | Q9KS33 | CC | Part of the ABC transporter complex PotABCD involved in spermidine/putrescine import                                                                                                    |
| P | Q9KS33 | CC | Part of the ABC transporter complex PotABCD involved in spermidine/putrescine import                                                                                                    |
| P | Q9KS33 | DE | Spermidine/putrescine import ATP-binding protein PotA;                                                                                                                                  |
| P | Q9KS33 | DE | Spermidine/putrescine import ATP-binding protein PotA;                                                                                                                                  |
| P | Q9KSL1 | CC | Part of the ABC transporter complex BtuCDF involved in vitamin B12 import                                                                                                               |
| P | Q9KSL1 | DE | Vitamin B12 import ATP-binding protein BtuD;                                                                                                                                            |
| P | Q9KSL1 | DE | Vitamin B12-transporting ATPase;                                                                                                                                                        |
| P | Q9KSL2 | CC | Part of the ABC transporter complex BtuCDF involved in vitamin B12 import                                                                                                               |
| P | Q9KSL2 | DE | Vitamin B12 import system permease protein BtuC;                                                                                                                                        |
| P | Q9KU04 | CC | Part of the ABC transporter complex PstSACB involved in phosphate import                                                                                                                |
| P | Q9KU04 | DE | ABC phosphate transporter 1;                                                                                                                                                            |
| P | Q9KU04 | DE | Phosphate import ATP-binding protein PstB 1;                                                                                                                                            |
| P | Q9KU04 | DE | Phosphate-transporting ATPase 1;                                                                                                                                                        |
| P | Q9KU04 | DR | inorganic phosphate transmembrane transporter activity                                                                                                                                  |
| P | Q9KU04 | DR | phosphate transmembrane-transporting ATPase activity                                                                                                                                    |
| P | Q9KUI0 | CC | Part of the ABC transporter complex CysAWT involved in sulfate/thiosulfate import                                                                                                       |
| P | Q9KUI0 | DE | Sulfate-transporting ATPase;                                                                                                                                                            |
| P | Q9KUI0 | DE | Sulfate/thiosulfate import ATP-binding protein CysA;                                                                                                                                    |
| P | Q9KUI0 | DR | sulfate transmembrane-transporting ATPase activity                                                                                                                                      |
| P | Q9KZW2 | CC | Part of the ABC transporter complex PstSACB involved in phosphate import                                                                                                                |
| P | Q9KZW2 | DE | ABC phosphate transporter;                                                                                                                                                              |
| P | Q9KZW2 | DE | Phosphate import ATP-binding protein PstB;                                                                                                                                              |
| P | Q9KZW2 | DE | Phosphate-transporting ATPase;                                                                                                                                                          |
| P | Q9KZW2 | DR | inorganic phosphate transmembrane transporter activity                                                                                                                                  |
| P | Q9KZW2 | DR | phosphate transmembrane-transporting ATPase activity                                                                                                                                    |

|   |        |    |                                                                                                                                                                                  |
|---|--------|----|----------------------------------------------------------------------------------------------------------------------------------------------------------------------------------|
| P | Q9L1C3 | CC | Part of the ABC transporter complex MetNIQ involved in methionine import                                                                                                         |
| P | Q9L1C3 | DE | Methionine import ATP-binding protein MetN;                                                                                                                                      |
| P | Q9L6L2 | CC | Interacts with trk system potassium uptake protein trkA and requires trkE for transport activity (By similarity).                                                                |
| P | Q9L6L2 | CC | Low-affinity potassium transport system                                                                                                                                          |
| P | Q9L6L2 | DE | Trk system potassium uptake protein trkH;                                                                                                                                        |
| P | Q9L772 | CC | Transport of water across the membrane                                                                                                                                           |
| P | Q9LD18 | CC | High-affinity potassium transporter.                                                                                                                                             |
| P | Q9LD18 | DE | Potassium transporter 4;                                                                                                                                                         |
| P | Q9LD18 | DR | potassium ion transmembrane transporter activity                                                                                                                                 |
| P | Q9LF50 | CC | Essential for the conversion of starch to sucrose in leaves at night, probably via the export of maltose from the chloroplast                                                    |
| P | Q9LF50 | CC | Probable maltose transporter                                                                                                                                                     |
| P | Q9LF50 | DE | Maltose excess protein 1, chloroplastic;                                                                                                                                         |
| P | Q9LF50 | DR | maltose transmembrane transporter activity                                                                                                                                       |
| P | Q9LF79 | CC | This magnesium-dependent enzyme catalyzes the hydrolysis of ATP coupled with the translocation of calcium from the cytosol out of the cell.                                      |
| P | Q9LF79 | DE | Ca <sup>2+</sup> -ATPase isoform 8;                                                                                                                                              |
| P | Q9LF79 | DE | Calcium-transporting ATPase 8, plasma membrane-type;                                                                                                                             |
| P | Q9LF79 | DR | calcium-transporting ATPase activity                                                                                                                                             |
| P | Q9LFB8 | CC | Peptide transporter                                                                                                                                                              |
| P | Q9LFB8 | DE | Peptide transporter PTR5;                                                                                                                                                        |
| P | Q9LFZ8 | CC | Translocates Ca <sup>2+</sup> and other metal ions into vacuoles using the proton gradient formed by H <sup>+</sup> -ATPase and H <sup>+</sup> -pyrophosphatase (By similarity). |
| P | Q9LFZ8 | DE | Ca <sup>2+</sup> /H <sup>+</sup> antiporter CAX6;                                                                                                                                |
| P | Q9LFZ8 | DE | Ca <sup>2+</sup> /H <sup>+</sup> exchanger 6;                                                                                                                                    |
| P | Q9LIK7 | CC | This magnesium-dependent enzyme catalyzes the hydrolysis of ATP coupled with the translocation of calcium from the cytosol out of the cell or into organelles (By similarity).   |
| P | Q9LIK7 | DE | Ca <sup>2+</sup> -ATPase isoform 13;                                                                                                                                             |
| P | Q9LIK7 | DE | Putative calcium-transporting ATPase 13, plasma membrane-type;                                                                                                                   |
| P | Q9LIK7 | DR | calcium-transporting ATPase activity                                                                                                                                             |
| P | Q9LJI2 | DE | Cation/calcium exchanger 3;                                                                                                                                                      |
| P | Q9LJI2 | DE | Protein CATION CALCIUM EXCHANGER 3;                                                                                                                                              |
| P | Q9LJI2 | DR | sodium ion transmembrane transporter activity                                                                                                                                    |
| P | Q9LJN2 | CC | magnesium transporter that may mediate the influx of magnesium (By similarity)                                                                                                   |
| P | Q9LJN2 | DE | Magnesium Transporter 4;                                                                                                                                                         |
| P | Q9LJN2 | DE | Magnesium transporter MRS2-3;                                                                                                                                                    |
| P | Q9LJN2 | DR | magnesium ion transmembrane transporter activity                                                                                                                                 |
| P | Q9LK64 | CC | Mediates the transport of glutathione conjugates such as chlorodinitrobenzene-GS (DNB-GS), and of chlorophyll catabolites such as Bn-NCC-1                                       |
| P | Q9LK64 | CC | Pump for glutathione S-conjugates                                                                                                                                                |
| P | Q9LK64 | DE | ATP-energized glutathione S-conjugate pump 3;                                                                                                                                    |
| P | Q9LK64 | DE | Glutathione S-conjugate-transporting ATPase 3;                                                                                                                                   |
| P | Q9LK64 | DR | glutathione S-conjugate-exporting ATPase activity                                                                                                                                |
| P | Q9LKW9 | CC | Involved in Na <sup>+</sup> and K <sup>+</sup> homeostasis                                                                                                                       |
| P | Q9LKW9 | CC | Regulates Na <sup>+</sup> content of the xylem sap.                                                                                                                              |
| P | Q9LKW9 | CC | Required for cytoplasmic Na <sup>+</sup> and Li <sup>+</sup> detoxification by secreting them from the cytoplasm to the extracellular space                                      |
| P | Q9LKW9 | DE | Na <sup>+</sup> /H <sup>+</sup> exchanger 7;                                                                                                                                     |
| P | Q9LKW9 | DE | Sodium/hydrogen exchanger 7;                                                                                                                                                     |
| P | Q9LNV3 | CC | Can transport glucose, D-glucosylglucose, xylose, mannose, fructose and galactose                                                                                                |
| P | Q9LNV3 | DE | Hexose transporter 2;                                                                                                                                                            |
| P | Q9LT15 | CC | Mediates an active uptake of hexoses, probably by sugar/hydrogen symport (By similarity).                                                                                        |
| P | Q9LT15 | DE | Sugar transport protein 10;                                                                                                                                                      |
| P | Q9LTH9 | CC | Mediates zinc uptake                                                                                                                                                             |
| P | Q9LTH9 | DE | Zinc transporter 2;                                                                                                                                                              |
| P | Q9LU41 | CC | This magnesium-dependent enzyme catalyzes the hydrolysis of ATP coupled with the translocation of calcium from the cytosol out of the cell or into organelles (By similarity).   |
| P | Q9LU41 | DE | Ca <sup>2+</sup> -ATPase isoform 9;                                                                                                                                              |
| P | Q9LU41 | DE | Calcium-transporting ATPase 9, plasma membrane-type;                                                                                                                             |
| P | Q9LU41 | DR | calcium-transporting ATPase activity                                                                                                                                             |
| P | Q9LW86 | CC | H <sup>+</sup> /sulfate cotransporter that may play a role in the regulation of sulfate assimilation (By similarity).                                                            |
| P | Q9LW86 | DE | Probable sulfate transporter 3.4;                                                                                                                                                |

|   |        |    |                                                                                                                                                                                                   |
|---|--------|----|---------------------------------------------------------------------------------------------------------------------------------------------------------------------------------------------------|
| P | Q9LW86 | DR | secondary active sulfate transmembrane transporter activity                                                                                                                                       |
| P | Q9LWR0 | CC | Aquaporins facilitate the transport of water and small neutral solutes across cell membranes                                                                                                      |
| P | Q9LWR2 | CC | Aquaporins facilitate the transport of water and small neutral solutes across cell membranes                                                                                                      |
| P | Q9LXD4 | CC | Putative magnesium transporter.                                                                                                                                                                   |
| P | Q9LXD4 | DE | Putative magnesium transporter MRS2-9;                                                                                                                                                            |
| P | Q9LXS1 | CC | Involved in sequestration of excess zinc in the cytoplasm into vacuoles to maintain zinc homeostasis.                                                                                             |
| P | Q9LY77 | CC | This magnesium-dependent enzyme catalyzes the hydrolysis of ATP coupled with the translocation of calcium from the cytosol out of the cell or into organelles (By similarity).                    |
| P | Q9LY77 | DE | Ca2+-ATPase isoform 12;                                                                                                                                                                           |
| P | Q9LY77 | DE | Calcium-transporting ATPase 12, plasma membrane-type;                                                                                                                                             |
| P | Q9LY77 | DR | calcium-transporting ATPase activity                                                                                                                                                              |
| P | Q9M1K3 | CC | Water channel required to facilitate the transport of water across cell membrane                                                                                                                  |
| P | Q9M271 | CC | Involved in sequestration of excess zinc in the cytoplasm into vacuoles to maintain zinc homeostasis (By similarity).                                                                             |
| P | Q9M2L4 | CC | This magnesium-dependent enzyme catalyzes the hydrolysis of ATP coupled with the translocation of calcium from the cytosol out of the cell or into organelles (By similarity).                    |
| P | Q9M2L4 | DE | Ca2+-ATPase isoform 11;                                                                                                                                                                           |
| P | Q9M2L4 | DE | Putative calcium-transporting ATPase 11, plasma membrane-type;                                                                                                                                    |
| P | Q9M2L4 | DR | calcium-transporting ATPase activity                                                                                                                                                              |
| P | Q9M390 | CC | Peptide transporter                                                                                                                                                                               |
| P | Q9M390 | DE | Peptide transporter PTR1;                                                                                                                                                                         |
| P | Q9M7J9 | CC | Probable potassium transporter.                                                                                                                                                                   |
| P | Q9M7J9 | DE | Potassium transporter 8;                                                                                                                                                                          |
| P | Q9M7J9 | DR | potassium ion transmembrane transporter activity                                                                                                                                                  |
| P | Q9M7K4 | CC | High-affinity potassium transporter                                                                                                                                                               |
| P | Q9M7K4 | DE | Potassium transporter 5;                                                                                                                                                                          |
| P | Q9M7K4 | DR | potassium:sodium symporter activity                                                                                                                                                               |
| P | Q9M8S6 | CC | Highly selective outward-rectifying potassium channel                                                                                                                                             |
| P | Q9M8S6 | CC | Involved in potassium release into the xylem sap toward the shoots                                                                                                                                |
| P | Q9M8S6 | DE | Potassium channel SKOR;                                                                                                                                                                           |
| P | Q9M8S6 | DE | Stelar K+ outward rectifying channel;                                                                                                                                                             |
| P | Q9M8S6 | DR | voltage-gated potassium channel activity                                                                                                                                                          |
| P | Q9M8W5 | CC | Water channel required to facilitate the transport of water across cell membrane.                                                                                                                 |
| P | Q9M8W5 | DR | water channel activity                                                                                                                                                                            |
| P | Q9MAX3 | CC | High-affinity H+/sulfate cotransporter that mediates the uptake of the environmental sulfate by plant roots                                                                                       |
| P | Q9MAX3 | CC | Plays a central role in the regulation of sulfate assimilation.                                                                                                                                   |
| P | Q9MAX3 | DE | Sulfate transporter 1.2;                                                                                                                                                                          |
| P | Q9MAX3 | DR | secondary active sulfate transmembrane transporter activity                                                                                                                                       |
| P | Q9N694 | DE | Ca2+-ATPase;                                                                                                                                                                                      |
| P | Q9N694 | DR | calcium-transporting ATPase activity                                                                                                                                                              |
| P | Q9NIV0 | CC | May be a carbon dioxide/bicarbonate transporter (By similarity).                                                                                                                                  |
| P | Q9NP91 | DE | Sodium- and chloride-dependent transporter XTRP3;                                                                                                                                                 |
| P | Q9NP91 | DE | Sodium/imino-acid transporter 1;                                                                                                                                                                  |
| P | Q9NP91 | DR | neurotransmitter:sodium symporter activity                                                                                                                                                        |
| P | Q9NP94 | CC | Mediates zinc uptake                                                                                                                                                                              |
| P | Q9NP94 | CC | Zinc uptake may be mediated by a Zn(2+)-HCO(3)(-) symport mechanism and can function in the presence of albumin                                                                                   |
| P | Q9NP94 | DE | Zinc transporter ZIP2;                                                                                                                                                                            |
| P | Q9NP94 | DR | zinc ion transmembrane transporter activity                                                                                                                                                       |
| P | Q9NPC2 | CC | pH-dependent, voltage-insensitive, background potassium channel protein.                                                                                                                          |
| P | Q9NPC2 | DE | Acid-sensitive potassium channel protein TASK-3;                                                                                                                                                  |
| P | Q9NPC2 | DE | Potassium channel subfamily K member 9;                                                                                                                                                           |
| P | Q9NPC2 | DE | TWIK-related acid-sensitive K+ channel 3;                                                                                                                                                         |
| P | Q9NPC2 | DE | Two pore K+ channel KT3.2;                                                                                                                                                                        |
| P | Q9NPC2 | DE | Two pore potassium channel KT3.2;                                                                                                                                                                 |
| P | Q9NPC2 | DR | potassium channel activity                                                                                                                                                                        |
| P | Q9NPI9 | CC | Inward rectifier potassium channels are characterized by a greater tendency to allow potassium to flow into the cell rather than out of it                                                        |
| P | Q9NPI9 | CC | Their voltage dependence is regulated by the concentration of extracellular potassium; as external potassium is raised, the voltage range of the channel opening shifts to more positive voltages |

|   |        |    |                                                                                                                                                                                                                                                  |
|---|--------|----|--------------------------------------------------------------------------------------------------------------------------------------------------------------------------------------------------------------------------------------------------|
| P | Q9NPI9 | DE | Inward rectifier K <sup>+</sup> channel Kir5.1;                                                                                                                                                                                                  |
| P | Q9NPI9 | DE | Inward rectifier potassium channel 16;                                                                                                                                                                                                           |
| P | Q9NPI9 | DE | Potassium channel, inwardly rectifying subfamily J member 16;                                                                                                                                                                                    |
| P | Q9NPI9 | DR | inward rectifier potassium channel activity                                                                                                                                                                                                      |
| P | Q9NQA5 | CC | A Ca <sup>2+</sup> -dependent feedback regulation includes fast channel inactivation and slow current decay                                                                                                                                      |
| P | Q9NQA5 | CC | Constitutively active calcium selective cation channel thought to be involved in Ca <sup>2+</sup> reabsorption in kidney and intestine                                                                                                           |
| P | Q9NQA5 | CC | The channel is activated by low internal calcium level and the current exhibits an inward rectification                                                                                                                                          |
| P | Q9NQA5 | DE | Calcium transport protein 2;                                                                                                                                                                                                                     |
| P | Q9NQA5 | DE | Epithelial calcium channel 1;                                                                                                                                                                                                                    |
| P | Q9NQA5 | DR | calcium channel activity                                                                                                                                                                                                                         |
| P | Q9NR82 | CC | Associates with KCNQ3 to form a potassium channel which contributes to M-type current, a slowly activating and deactivating potassium conductance which plays a critical role in determining the subthreshold electrical excitability of neurons |
| P | Q9NR82 | CC | May contribute, with other potassium channels, to the molecular diversity of an heterogeneous population of M-channels, varying in kinetic and pharmacological properties, which underlie this physiologically important current                 |
| P | Q9NR82 | DE | Potassium channel subunit alpha KvLQT5;                                                                                                                                                                                                          |
| P | Q9NR82 | DE | Potassium voltage-gated channel subfamily KQT member 5;                                                                                                                                                                                          |
| P | Q9NR82 | DE | Voltage-gated potassium channel subunit Kv7.5;                                                                                                                                                                                                   |
| P | Q9NR82 | DR | inward rectifier potassium channel activity                                                                                                                                                                                                      |
| P | Q9NRA2 | DE | Sodium/sialic acid cotransporter;                                                                                                                                                                                                                |
| P | Q9NRM0 | CC | Also transports glucose at low rate.                                                                                                                                                                                                             |
| P | Q9NRM0 | DE | Glucose transporter type 9;                                                                                                                                                                                                                      |
| P | Q9NRM0 | DE | Solute carrier family 2, facilitated glucose transporter member 9;                                                                                                                                                                               |
| P | Q9NS40 | CC | Pore-forming (alpha) subunit of voltage-gated potassium channel                                                                                                                                                                                  |
| P | Q9NS40 | DE | Ether-a-go-go-related gene potassium channel 3;                                                                                                                                                                                                  |
| P | Q9NS40 | DE | Potassium voltage-gated channel subfamily H member 7;                                                                                                                                                                                            |
| P | Q9NS40 | DE | Voltage-gated potassium channel subunit Kv11.3;                                                                                                                                                                                                  |
| P | Q9NSA2 | CC | Pore-forming (alpha) subunit of voltage-gated rapidly inactivating A-type potassium channels                                                                                                                                                     |
| P | Q9NSA2 | DE | Potassium voltage-gated channel subfamily D member 1;                                                                                                                                                                                            |
| P | Q9NSA2 | DE | Voltage-gated potassium channel subunit Kv4.1;                                                                                                                                                                                                   |
| P | Q9NSA2 | DR | voltage-gated potassium channel activity                                                                                                                                                                                                         |
| P | Q9NSD5 | CC | Terminates the action of GABA by its high affinity sodium-dependent reuptake into presynaptic terminals.                                                                                                                                         |
| P | Q9NSD5 | CC | Terminates the action of GABA by its high affinity sodium-dependent reuptake into presynaptic terminals.                                                                                                                                         |
| P | Q9NSD5 | DE | Sodium- and chloride-dependent GABA transporter 2;                                                                                                                                                                                               |
| P | Q9NSD5 | DE | Sodium- and chloride-dependent GABA transporter 2;                                                                                                                                                                                               |
| P | Q9NSD5 | DR | gamma-aminobutyric acid:sodium symporter activity                                                                                                                                                                                                |
| P | Q9NSD5 | DR | gamma-aminobutyric acid:sodium symporter activity                                                                                                                                                                                                |
| P | Q9NSD5 | DR | neurotransmitter:sodium symporter activity                                                                                                                                                                                                       |
| P | Q9NUM3 | DE | Zinc transporter ZIP9;                                                                                                                                                                                                                           |
| P | Q9NY26 | CC | May function as a major endogenous zinc uptake transporter in many cells of the body.                                                                                                                                                            |
| P | Q9NY26 | CC | Mediates zinc uptake                                                                                                                                                                                                                             |
| P | Q9NY26 | CC | Responsible for the rapid uptake and accumulation of physiologically effective zinc in prostate cells.                                                                                                                                           |
| P | Q9NY26 | DE | Zinc transporter ZIP1;                                                                                                                                                                                                                           |
| P | Q9NY26 | DE | Zinc-iron-regulated transporter-like;                                                                                                                                                                                                            |
| P | Q9NY26 | DR | zinc ion transmembrane transporter activity                                                                                                                                                                                                      |
| P | Q9NY37 | CC | The activated channel exhibits selectivity for sodium, and is inhibited by acetazolamide                                                                                                                                                         |
| P | Q9NY37 | DE | Human intestine Na <sup>+</sup> channel;                                                                                                                                                                                                         |
| P | Q9NY64 | CC | Binds cytochalasin B in a glucose-inhibitable manner                                                                                                                                                                                             |
| P | Q9NY64 | CC | Insulin-regulated facilitative glucose transporter                                                                                                                                                                                               |
| P | Q9NY64 | DE | Glucose transporter type 8;                                                                                                                                                                                                                      |
| P | Q9NY64 | DE | Glucose transporter type X1;                                                                                                                                                                                                                     |
| P | Q9NY64 | DE | Solute carrier family 2, facilitated glucose transporter member 8;                                                                                                                                                                               |
| P | Q9NY64 | DR | D-glucose transmembrane transporter activity                                                                                                                                                                                                     |
| P | Q9NY91 | CC | Sodium-dependent glucose transporter (By similarity).                                                                                                                                                                                            |
| P | Q9NY91 | CC | Sodium-dependent glucose transporter (By similarity).                                                                                                                                                                                            |
| P | Q9NY91 | DE | Low affinity sodium-glucose cotransporter;                                                                                                                                                                                                       |
| P | Q9NY91 | DE | Na <sup>+</sup> /glucose cotransporter 3;                                                                                                                                                                                                        |

|   |        |    |                                                                                                                                                                                         |
|---|--------|----|-----------------------------------------------------------------------------------------------------------------------------------------------------------------------------------------|
| P | Q9NY91 | DE | Na <sup>+</sup> /glucose cotransporter 3;                                                                                                                                               |
| P | Q9NY91 | DE | Sodium/glucose cotransporter 3;                                                                                                                                                         |
| P | Q9NY91 | DE | Sodium/glucose cotransporter 3;                                                                                                                                                         |
| P | Q9NYG8 | CC | Outward rectification is reversed at high external K <sup>+</sup> concentrations (By similarity)                                                                                        |
| P | Q9NYG8 | CC | Voltage insensitive, instantaneous, outwardly rectifying potassium channel                                                                                                              |
| P | Q9NYG8 | DE | Potassium channel subfamily K member 4;                                                                                                                                                 |
| P | Q9NYG8 | DE | TWIK-related arachidonic acid-stimulated potassium channel protein;                                                                                                                     |
| P | Q9NYG8 | DE | Two pore K <sup>+</sup> channel KT4.1;                                                                                                                                                  |
| P | Q9NYG8 | DE | Two pore potassium channel KT4.1;                                                                                                                                                       |
| P | Q9NYG8 | DR | potassium channel activity                                                                                                                                                              |
| P | Q9NZA1 | CC | Can insert into membranes and form poorly selective ion channels that may also transport chloride ions                                                                                  |
| P | Q9NZA1 | DE | Chloride intracellular channel protein 5;                                                                                                                                               |
| P | Q9NZA1 | DR | voltage-gated chloride channel activity                                                                                                                                                 |
| P | Q9NZV8 | CC | Pore-forming (alpha) subunit of voltage-gated rapidly inactivating A-type potassium channels                                                                                            |
| P | Q9NZV8 | DE | Potassium voltage-gated channel subfamily D member 2;                                                                                                                                   |
| P | Q9NZV8 | DE | Voltage-gated potassium channel subunit Kv4.2;                                                                                                                                          |
| P | Q9P1Z3 | CC | Putative hyperpolarization-activated ion channel exhibiting weak selectivity for potassium over sodium ions (By similarity).                                                            |
| P | Q9P1Z3 | DE | Potassium/sodium hyperpolarization-activated cyclic nucleotide-gated channel 3;                                                                                                         |
| P | Q9P1Z3 | DE | Potassium/sodium hyperpolarization-activated cyclic nucleotide-gated channel 3;                                                                                                         |
| P | Q9P1Z3 | DR | sodium channel activity                                                                                                                                                                 |
| P | Q9P1Z3 | DR | voltage-gated potassium channel activity                                                                                                                                                |
| P | Q9P2U7 | CC | Mediates the uptake of glutamate into synaptic vesicles at presynaptic nerve terminals of excitatory neural cells                                                                       |
| P | Q9P2U7 | DE | Vesicular glutamate transporter 1;                                                                                                                                                      |
| P | Q9P2U7 | DR | L-glutamate transmembrane transporter activity                                                                                                                                          |
| P | Q9P2U8 | CC | Mediates the uptake of glutamate into synaptic vesicles at presynaptic nerve terminals of excitatory neural cells                                                                       |
| P | Q9P2U8 | DE | Vesicular glutamate transporter 2;                                                                                                                                                      |
| P | Q9P2U8 | DR | L-glutamate transmembrane transporter activity                                                                                                                                          |
| P | Q9P380 | DE | Peptide permease ptr2;                                                                                                                                                                  |
| P | Q9P380 | DE | Probable peptide transporter ptr2;                                                                                                                                                      |
| P | Q9P3U6 | CC | High-affinity glucose transporter.                                                                                                                                                      |
| P | Q9P3U6 | DE | High-affinity glucose transporter ght1;                                                                                                                                                 |
| P | Q9P7F9 | CC | Required for high affinity copper (probably reduced Cu I) transport into the cell.                                                                                                      |
| P | Q9P7F9 | DE | Copper transport protein ctr5;                                                                                                                                                          |
| P | Q9P7F9 | DE | Copper transporter 5;                                                                                                                                                                   |
| P | Q9P7F9 | DR | copper ion transmembrane transporter activity                                                                                                                                           |
| P | Q9P7I1 | CC | Potassium-proton antiport (By similarity).                                                                                                                                              |
| P | Q9P7I1 | DE | K <sup>+</sup> /H <sup>+</sup> antiporter 1;                                                                                                                                            |
| P | Q9PAP0 | CC | Part of the ABC transporter complex CcmAB involved in the biogenesis of c-type cytochromes; once thought to export heme, this seems not to be the case, but its exact role is uncertain |
| P | Q9PAP0 | DE | Heme exporter protein A;                                                                                                                                                                |
| P | Q9PAP0 | DR | heme-transporting ATPase activity                                                                                                                                                       |
| P | Q9PBK0 | CC | Part of the ABC transporter complex PstSACB involved in phosphate import                                                                                                                |
| P | Q9PBK0 | DE | ABC phosphate transporter;                                                                                                                                                              |
| P | Q9PBK0 | DE | Phosphate import ATP-binding protein PstB;                                                                                                                                              |
| P | Q9PBK0 | DE | Phosphate-transporting ATPase;                                                                                                                                                          |
| P | Q9PBK0 | DR | inorganic phosphate transmembrane transporter activity                                                                                                                                  |
| P | Q9PBK0 | DR | phosphate transmembrane-transporting ATPase activity                                                                                                                                    |
| P | Q9PBK1 | CC | Part of a binding-protein-dependent transport system for phosphate; probably responsible for the translocation of the substrate across the membrane (By similarity)                     |
| P | Q9PBK1 | DE | Phosphate transport system permease protein pstA;                                                                                                                                       |
| P | Q9PBK1 | DR | inorganic phosphate transmembrane transporter activity                                                                                                                                  |
| P | Q9PBK2 | CC | Part of a binding-protein-dependent transport system for phosphate; probably responsible for the translocation of the substrate across the membrane (By similarity)                     |
| P | Q9PBK2 | DE | Phosphate transport system permease protein pstC;                                                                                                                                       |
| P | Q9PBK2 | DR | inorganic phosphate transmembrane transporter activity                                                                                                                                  |
| P | Q9PBK3 | CC | Part of the ABC transporter complex pstSACB involved in phosphate import (By similarity).                                                                                               |
| P | Q9PBK3 | DE | Phosphate-binding protein pstS;                                                                                                                                                         |
| P | Q9PBK3 | DR | inorganic phosphate transmembrane transporter activity                                                                                                                                  |

|   |        |    |                                                                                                                                                                       |
|---|--------|----|-----------------------------------------------------------------------------------------------------------------------------------------------------------------------|
| P | Q9PC78 | CC | Transport of potassium into the cell (By similarity).                                                                                                                 |
| P | Q9PC78 | DE | Probable potassium transport system protein kup;                                                                                                                      |
| P | Q9PC78 | DR | potassium ion transmembrane transporter activity                                                                                                                      |
| P | Q9PDN2 | CC | Part of the ABC transporter complex CysAW 1P involved in sulfate/inosulfate import                                                                                    |
| P | Q9PDN2 | DE | Sulfate-transporting ATPase;                                                                                                                                          |
| P | Q9PDN2 | DE | Sulfate/thiosulfate import ATP-binding protein CysA;                                                                                                                  |
| P | Q9PDN2 | DR | sulfate transmembrane-transporting ATPase activity                                                                                                                    |
| P | Q9PEL3 | CC | H+-stimulated, highly selective, manganese uptake system (By similarity).                                                                                             |
| P | Q9PEL3 | DE | Probable manganese transport protein mntH;                                                                                                                            |
| P | Q9PHQ1 | CC | Part of the ABC transporter complex PstSACB involved in phosphate import                                                                                              |
| P | Q9PHQ1 | DE | ABC phosphate transporter;                                                                                                                                            |
| P | Q9PHQ1 | DE | Phosphate import ATP-binding protein PstB;                                                                                                                            |
| P | Q9PHQ1 | DE | Phosphate-transporting ATPase;                                                                                                                                        |
| P | Q9PHQ1 | DR | inorganic phosphate transmembrane transporter activity                                                                                                                |
| P | Q9PHQ1 | DR | phosphate transmembrane-transporting ATPase activity                                                                                                                  |
| P | Q9PJP6 | DE | ADP,ATP carrier protein 2;                                                                                                                                            |
| P | Q9PJP6 | DE | ADP/ATP translocase 2;                                                                                                                                                |
| P | Q9PJP6 | DE | ADP/ATP translocase 2;                                                                                                                                                |
| P | Q9PJP6 | DR | ATP:ADP antiporter activity                                                                                                                                           |
| P | Q9PJP6 | DR | ATP:ADP antiporter activity                                                                                                                                           |
| P | Q9PK20 | CC | The arginine uptake by the bacterium in the macrophage may be a virulence factor against the host innate immune response (By similarity).                             |
| P | Q9PK20 | DE | Arginine/agmatine antiporter;                                                                                                                                         |
| P | Q9PKX5 | DE | ADP,ATP carrier protein 1;                                                                                                                                            |
| P | Q9PKX5 | DE | ADP/ATP translocase 1;                                                                                                                                                |
| P | Q9PKX5 | DE | ADP/ATP translocase 1;                                                                                                                                                |
| P | Q9PKX5 | DR | ATP:ADP antiporter activity                                                                                                                                           |
| P | Q9PKX5 | DR | ATP:ADP antiporter activity                                                                                                                                           |
| P | Q9PPI1 | CC | Mediates influx of magnesium ions (By similarity).                                                                                                                    |
| P | Q9PPI1 | DE | Magnesium transport protein CorA;                                                                                                                                     |
| P | Q9PPI1 | DR | cobalt ion transmembrane transporter activity                                                                                                                         |
| P | Q9PPI1 | DR | magnesium ion transmembrane transporter activity                                                                                                                      |
| P | Q9PQU3 | CC | Part of the ABC transporter complex PstSACB involved in phosphate import                                                                                              |
| P | Q9PQU3 | DE | ABC phosphate transporter;                                                                                                                                            |
| P | Q9PQU3 | DE | Phosphate import ATP-binding protein PstB;                                                                                                                            |
| P | Q9PQU3 | DE | Phosphate-transporting ATPase;                                                                                                                                        |
| P | Q9PQU3 | DR | inorganic phosphate transmembrane transporter activity                                                                                                                |
| P | Q9PQU3 | DR | phosphate transmembrane-transporting ATPase activity                                                                                                                  |
| P | Q9PR37 | CC | Part of the ABC transporter complex PotABCD involved in                                                                                                               |
| P | Q9PR37 | CC | part of the ABC transporter complex PotABCD involved in                                                                                                               |
| P | Q9PR37 | DE | spermidine/putrescine import                                                                                                                                          |
| P | Q9PR37 | DE | Spermidine/putrescine import ATP-binding protein PotA;                                                                                                                |
| P | Q9PR37 | DE | Spermidine/putrescine import ATP-binding protein PotA;                                                                                                                |
| P | Q9QX29 | CC | Has also been shown to be calcium-selective                                                                                                                           |
| P | Q9QX29 | CC | May also be activated by intracellular calcium store depletion.                                                                                                       |
| P | Q9QX29 | CC | thought to form a receptor-activated non-selective calcium permeant cation channel                                                                                    |
| P | Q9QX29 | DE | Capacitative calcium entry channel 2;                                                                                                                                 |
| P | Q9QX29 | DR | calcium channel activity                                                                                                                                              |
| P | Q9QXX4 | CC | Calcium-dependent mitochondrial aspartate and glutamate carrier                                                                                                       |
| P | Q9QXX4 | DE | Mitochondrial aspartate glutamate carrier 2;                                                                                                                          |
| P | Q9QXX4 | DR | L-glutamate transmembrane transporter activity                                                                                                                        |
| P | Q9QYB1 | CC | Can insert into membranes and form poorly selective ion channels that may also transport chloride ions                                                                |
| P | Q9QYB1 | DE | Chloride intracellular channel protein 4;                                                                                                                             |
| P | Q9QYB1 | DR | voltage-gated chloride channel activity                                                                                                                               |
| P | Q9QZD8 | DE | Mitochondrial dicarboxylate carrier;                                                                                                                                  |
| P | Q9R0A1 | CC | Chloride channels have several functions including the regulation of cell volume; membrane potential stabilization, signal transduction and transepithelial transport |
| P | Q9R0A1 | CC | Voltage-gated chloride channel                                                                                                                                        |
| P | Q9R0A1 | DE | Chloride channel protein 2;                                                                                                                                           |
| P | Q9R0A1 | DR | voltage-gated chloride channel activity                                                                                                                               |
| P | Q9R0K7 | CC | This magnesium-dependent enzyme catalyzes the hydrolysis of ATP coupled with the transport of calcium out of the cell                                                 |
| P | Q9R0K7 | DE | Plasma membrane calcium ATPase isoform 2;                                                                                                                             |
| P | Q9R0K7 | DE | Plasma membrane calcium pump isoform 2;                                                                                                                               |
| P | Q9R0K7 | DE | Plasma membrane calcium-transporting ATPase 2;                                                                                                                        |



|   |        |    |                                                                                                                                                                                                            |
|---|--------|----|------------------------------------------------------------------------------------------------------------------------------------------------------------------------------------------------------------|
| P | Q9R0K7 | DR | calcium-dependent ATPase activity                                                                                                                                                                          |
| P | Q9R0K7 | DR | calcium-transporting ATPase activity                                                                                                                                                                       |
| P | Q9R0Y1 | CC | The activated channel exhibits selectivity for sodium and lithium, and is inhibited by amiloride (By similarity).                                                                                          |
| P | Q9R0Y1 | DE | Brain-liver-intestine amiloride-sensitive Na <sup>+</sup> channel;                                                                                                                                         |
| P | Q9R155 | CC | Sodium-independent transporter of chloride and iodide.                                                                                                                                                     |
| P | Q9R155 | DE | Sodium-independent chloride/iodide transporter;                                                                                                                                                            |
| P | Q9R1N3 | CC | Electroneutral sodium- and bicarbonate-dependent cotransporter with a Na <sup>+</sup> :HCO <sub>3</sub> <sup>-</sup> 1:1 stoichiometry                                                                     |
| P | Q9R1N3 | CC | Electroneutral sodium- and bicarbonate-dependent cotransporter with a Na <sup>+</sup> :HCO <sub>3</sub> <sup>-</sup> 1:1 stoichiometry                                                                     |
| P | Q9R1N3 | CC | May also have an associated sodium channel activity.                                                                                                                                                       |
| P | Q9R1N3 | CC | Regulates intracellular pH and may play a role in bicarbonate salvage in secretory epithelia                                                                                                               |
| P | Q9R244 | CC | May also be activated by intracellular calcium store depletion.                                                                                                                                            |
| P | Q9R244 | CC | thought to form a receptor-activated non-selective calcium permeant cation channel                                                                                                                         |
| P | Q9R244 | DR | calcium channel activity                                                                                                                                                                                   |
| P | Q9R244 | DR | store-operated calcium channel activity                                                                                                                                                                    |
| P | Q9R6U5 | DE | Nitrate transporter;                                                                                                                                                                                       |
| P | Q9RDI1 | CC | Part of the ABC transporter complex RbsABCD involved in ribose import                                                                                                                                      |
| P | Q9RDI1 | DE | Ribose import ATP-binding protein RbsA 2;                                                                                                                                                                  |
| P | Q9RKQ4 | CC | Part of the ABC transporter complex HmuTUV involved in hemin import                                                                                                                                        |
| P | Q9RKQ4 | DE | Hemin import ATP-binding protein HmuV;                                                                                                                                                                     |
| P | Q9RPF2 | CC | H <sup>+</sup> -stimulated, highly selective, manganese uptake system (By similarity).                                                                                                                     |
| P | Q9RPF2 | DE | Manganese transport protein mntH2;                                                                                                                                                                         |
| P | Q9RPF3 | CC | H <sup>+</sup> -stimulated, highly selective, manganese uptake system (By similarity).                                                                                                                     |
| P | Q9RPF3 | DE | Manganese transport protein mntH1;                                                                                                                                                                         |
| P | Q9RPF4 | CC | H <sup>+</sup> -stimulated, highly selective, manganese uptake system (By similarity).                                                                                                                     |
| P | Q9RPF4 | DE | Manganese transport protein mntH;                                                                                                                                                                          |
| P | Q9RPX0 | CC | Involved in the high-affinity zinc uptake transport system.                                                                                                                                                |
| P | Q9RPX0 | DE | High-affinity zinc uptake system protein znuA;                                                                                                                                                             |
| P | Q9RTP8 | CC | H <sup>+</sup> -stimulated, highly selective, manganese uptake system (By similarity).                                                                                                                     |
| P | Q9RTP8 | DE | Probable manganese transport protein mntH;                                                                                                                                                                 |
| P | Q9RZN6 | CC | One of the components of the high-affinity ATP-driven potassium transport (or KDP) system, which catalyzes the hydrolysis of ATP coupled with the exchange of hydrogen and potassium ions                  |
| P | Q9RZN6 | DE | Potassium-binding and translocating subunit C;                                                                                                                                                             |
| P | Q9RZN6 | DE | Potassium-translocating ATPase C chain;                                                                                                                                                                    |
| P | Q9RZN6 | DE | Potassium-transporting ATPase C chain;                                                                                                                                                                     |
| P | Q9RZN6 | DR | potassium-transporting ATPase activity                                                                                                                                                                     |
| P | Q9RZN7 | CC | One of the components of the high-affinity ATP-driven potassium transport (or KDP) system, which catalyzes the hydrolysis of ATP coupled with the exchange of hydrogen and potassium ions (By similarity). |
| P | Q9RZN7 | DE | Potassium-binding and translocating subunit A;                                                                                                                                                             |
| P | Q9RZN7 | DE | Potassium-translocating ATPase A chain;                                                                                                                                                                    |
| P | Q9RZN7 | DE | Potassium-transporting ATPase A chain;                                                                                                                                                                     |
| P | Q9RZN7 | DR | potassium-transporting ATPase activity                                                                                                                                                                     |
| P | Q9RZP0 | CC | One of the components of the high-affinity ATP-driven potassium transport (or KDP) system, which catalyzes the hydrolysis of ATP coupled with the exchange of hydrogen and potassium ions (By similarity). |
| P | Q9RZP0 | DE | Potassium-binding and translocating subunit B;                                                                                                                                                             |
| P | Q9RZP0 | DE | Potassium-translocating ATPase B chain;                                                                                                                                                                    |
| P | Q9RZP0 | DE | Potassium-transporting ATPase B chain;                                                                                                                                                                     |
| P | Q9RZP0 | DR | potassium-transporting ATPase activity                                                                                                                                                                     |
| P | Q9S1X8 | CC | Na <sup>+</sup> /H <sup>+</sup> antiporter that extrudes sodium in exchange for external protons (By similarity)                                                                                           |
| P | Q9S1X8 | DE | Na <sup>+</sup> /H <sup>+</sup> antiporter nhaA 1/4;                                                                                                                                                       |
| P | Q9S1X8 | DE | Sodium/proton antiporter nhaA 1;                                                                                                                                                                           |
| P | Q9S2C8 | CC | Na <sup>+</sup> /H <sup>+</sup> antiporter that extrudes sodium in exchange for external protons (By similarity)                                                                                           |
| P | Q9S2C8 | DE | Na <sup>+</sup> /H <sup>+</sup> antiporter nhaA 2;                                                                                                                                                         |
| P | Q9S2C8 | DE | Sodium/proton antiporter nhaA 2;                                                                                                                                                                           |
| P | Q9S3K0 | CC | The physiological role may be the reduction of the intracellular concentration of toxic sugars or sugar metabolites                                                                                        |
| P | Q9S3K0 | CC | Transports IPTG, lactose and arabinose.                                                                                                                                                                    |
| P | Q9S3K0 | DE | Sugar efflux transporter A;                                                                                                                                                                                |
| P | Q9S3K0 | DR | sugar efflux transmembrane transporter activity                                                                                                                                                            |

|   |        |    |                                                                                                                                                       |
|---|--------|----|-------------------------------------------------------------------------------------------------------------------------------------------------------|
| P | Q9S6V3 | DR | ATP:ADP antiporter activity                                                                                                                           |
| P | Q9S6V3 | DR | ATP:ADP antiporter activity                                                                                                                           |
| P | Q9S6Z8 | CC | Outward rectifying potassium channel                                                                                                                  |
| P | Q9S6Z8 | DE | Probable calcium-activated outward-rectifying potassium channel 3, chloroplast                                                                        |
| P | Q9S6Z8 | DR | potassium channel activity                                                                                                                            |
| P | Q9S735 | CC | High-affinity transporter for external inorganic phosphate (By similarity).                                                                           |
| P | Q9S735 | DE | Probable inorganic phosphate transporter 1-9;                                                                                                         |
| P | Q9S7J8 | CC | Acts by delivering copper to create functional hormone receptors.                                                                                     |
| P | Q9S7J8 | CC | Essential for ethylene signaling, which requires copper                                                                                               |
| P | Q9S7J8 | CC | Involved in copper import into the cell                                                                                                               |
| P | Q9S7J8 | DE | Copper-transporting ATPase RAN1;                                                                                                                      |
| P | Q9S7J8 | DR | copper-exporting ATPase activity                                                                                                                      |
| P | Q9S9N4 | CC | Magnesium transporter that may mediate the influx of magnesium.                                                                                       |
| P | Q9S9N4 | DE | Magnesium Transporter 2;                                                                                                                              |
| P | Q9S9N4 | DE | Magnesium transporter MRS2-1;                                                                                                                         |
| P | Q9S9N4 | DR | magnesium ion transmembrane transporter activity                                                                                                      |
| P | Q9S9N8 | DE | Metal transporter Nramp6;                                                                                                                             |
| P | Q9SA05 | CC | Putative potassium transporter.                                                                                                                       |
| P | Q9SA05 | DE | Potassium transporter 10;                                                                                                                             |
| P | Q9SA05 | DR | potassium ion transmembrane transporter activity                                                                                                      |
| P | Q9SAH0 | CC | High-affinity magnesium transporter that mediates the influx of magnesium                                                                             |
| P | Q9SAH0 | DE | Magnesium Transporter 1;                                                                                                                              |
| P | Q9SAH0 | DE | Magnesium transporter MRS2-10;                                                                                                                        |
| P | Q9SAH0 | DR | magnesium ion transmembrane transporter activity                                                                                                      |
| P | Q9SAH8 | DE | Metal transporter Nramp1;                                                                                                                             |
| P | Q9SAI4 | CC | Very low water transport activity.                                                                                                                    |
| P | Q9SAY1 | CC | High-affinity H <sup>+</sup> /sulfate cotransporter that mediates the uptake of the environmental sulfate by plant roots under low- sulfur conditions |
| P | Q9SAY1 | CC | Plays a central role in the regulation of sulfate assimilation.                                                                                       |
| P | Q9SAY1 | DE | High-affinity sulfate transporter 1;                                                                                                                  |
| P | Q9SAY1 | DE | Sulfate transporter 1.1;                                                                                                                              |
| P | Q9SAY1 | DR | secondary active sulfate transmembrane transporter activity                                                                                           |
| P | Q9SBA7 | DE | Hexose transporter 8;                                                                                                                                 |
| P | Q9SCW7 | CC | Sugar transporter (Potential).                                                                                                                        |
| P | Q9SCW7 | DE | Sugar transporter ERD6-like 1;                                                                                                                        |
| P | Q9SCW7 | DE | Sugar transporter-like protein 4;                                                                                                                     |
| P | Q9SCX5 | CC | Probable potassium channel                                                                                                                            |
| P | Q9SCX5 | DE | Probable potassium channel AKT5;                                                                                                                      |
| P | Q9SCX5 | DR | voltage-gated potassium channel activity                                                                                                              |
| P | Q9SD00 | DE | Sugar transporter MSSP3;                                                                                                                              |
| P | Q9SDI4 | DE | Phosphate transporter 4;1;                                                                                                                            |
| P | Q9SFG0 | CC | Mediates an active uptake of hexoses, probably by sugar/hydrogen symport                                                                              |
| P | Q9SFG0 | DE | Sugar transport protein 6;                                                                                                                            |
| P | Q9SH30 | CC | Involved in copper import into the cell.                                                                                                              |
| P | Q9SH30 | DE | Putative copper-transporting ATPase 3;                                                                                                                |
| P | Q9SH30 | DR | copper-exporting ATPase activity                                                                                                                      |
| P | Q9SLG3 | CC | Mediates zinc uptake from the rhizosphere                                                                                                             |
| P | Q9SLG3 | DE | Zinc transporter 3;                                                                                                                                   |
| P | Q9SLG3 | DR | zinc ion transmembrane transporter activity                                                                                                           |
| P | Q9SN36 | DE | Metal transporter Nramp5;                                                                                                                             |
| P | Q9SNV9 | CC | Regulates metal accumulation under Fe starvation                                                                                                      |
| P | Q9SNV9 | CC | Vacuolar metal transporter involved in intracellular metal homeostasis                                                                                |
| P | Q9SNV9 | DE | Metal transporter Nramp3;                                                                                                                             |
| P | Q9SRK7 | CC | Transports natural purines (adenine and guanine) as well as purine analogs                                                                            |
| P | Q9SRK7 | DE | Adenine/guanine permease AZG1;                                                                                                                        |
| P | Q9SRK7 | DE | Adenine/guanine permease AZG1;                                                                                                                        |
| P | Q9SRK7 | DR | purine base transmembrane transporter activity                                                                                                        |
| P | Q9STX9 | CC | Potential aquaporin, which may facilitate the transport of water and small neutral solutes across cell membranes (By similarity).                     |
| P | Q9STX9 | DR | water channel activity                                                                                                                                |
| P | Q9SV13 | CC | H <sup>+</sup> /sulfate cotransporter that may play a role in the regulation of sulfate assimilation                                                  |
| P | Q9SV13 | DE | Sulfate transporter 3.1;                                                                                                                              |
| P | Q9SV13 | DR | secondary active sulfate transmembrane transporter activity                                                                                           |
| P | Q9SV31 | CC | Aquaporins facilitate the transport of water and small neutral solutes across cell membranes (By similarity).                                         |

|   |        |    |                                                                                                                                                                                |
|---|--------|----|--------------------------------------------------------------------------------------------------------------------------------------------------------------------------------|
| P | Q9SV84 | CC | Low water transport activity                                                                                                                                                   |
| P | Q9SV84 | DR | water channel activity                                                                                                                                                         |
| P | Q9SVV6 | CC | Calcium-activated outward rectifying potassium channel                                                                                                                         |
| P | Q9SVV6 | DE | Probable calcium-activated outward-rectifying potassium channel 6;                                                                                                             |
| P | Q9SVV6 | DR | potassium channel activity                                                                                                                                                     |
| P | Q9SWR8 | DE | Nitrate transporter;                                                                                                                                                           |
| P | Q9SX48 | DE | Hexose transporter 9;                                                                                                                                                          |
| P | Q9SXF8 | CC | Increases the capacity for root water uptake under water deficit                                                                                                               |
| P | Q9SXF8 | CC | Water channel required to facilitate the transport of water across cell membrane                                                                                               |
| P | Q9SXF8 | DE | Water channel protein RWC3;                                                                                                                                                    |
| P | Q9SXS2 | CC | H <sup>+</sup> /sulfate cotransporter that may play a role in the regulation of sulfate assimilation (By similarity).                                                          |
| P | Q9SXS2 | DE | Probable sulfate transporter 3.3;                                                                                                                                              |
| P | Q9SXS2 | DR | secondary active sulfate transmembrane transporter activity                                                                                                                    |
| P | Q9SY55 | CC | Involved in calcium-enhanced root growth, in tolerance to toxic levels of manganese and in secretory processes                                                                 |
| P | Q9SY55 | CC | This magnesium-dependent enzyme catalyzes the hydrolysis of ATP coupled with the translocation of calcium from the cytosol to an endomembrane compartment                      |
| P | Q9SY55 | DE | Calcium-transporting ATPase 3, endoplasmic reticulum-type;                                                                                                                     |
| P | Q9SY55 | DR | calcium-transporting ATPase activity                                                                                                                                           |
| P | Q9SYG9 | DE | Cation/calcium exchanger 4;                                                                                                                                                    |
| P | Q9SYG9 | DE | Protein CATION CALCIUM EXCHANGER 4;                                                                                                                                            |
| P | Q9SYQ1 | CC | High-affinity transporter for external inorganic phosphate (By similarity).                                                                                                    |
| P | Q9SYQ1 | DE | Probable inorganic phosphate transporter 1-8;                                                                                                                                  |
| P | Q9SZC9 | CC | Involved in copper transport (Potential).                                                                                                                                      |
| P | Q9SZC9 | DE | Putative copper-transporting ATPase PAA1;                                                                                                                                      |
| P | Q9SZC9 | DR | copper-exporting ATPase activity                                                                                                                                               |
| P | Q9SZR1 | CC | This magnesium-dependent enzyme catalyzes the hydrolysis of ATP coupled with the translocation of calcium from the cytosol into the endoplasmic reticulum (By similarity).     |
| P | Q9SZR1 | DE | Ca <sup>2+</sup> -ATPase isoform 10;                                                                                                                                           |
| P | Q9SZR1 | DE | Calcium-transporting ATPase 10, plasma membrane-type;                                                                                                                          |
| P | Q9SZR1 | DR | calcium-transporting ATPase activity                                                                                                                                           |
| P | Q9T095 | DE | Oligopeptide transporter 6;                                                                                                                                                    |
| P | Q9T095 | DR | oligopeptide transporter activity                                                                                                                                              |
| P | Q9U6A0 | CC | may function in the removal and maintenance of calcium homeostasis during signaling in the adult and in signaling events during embryogenesis and patterning of imaginal discs |
| P | Q9U6A0 | CC | Transports one Ca <sup>2+</sup> and 1 K <sup>+</sup> in exchange for 4 Na <sup>+</sup> .                                                                                       |
| P | Q9U6A0 | CC | Transports one Ca <sup>2+</sup> and 1 K <sup>+</sup> in exchange for 4 Na <sup>+</sup> .                                                                                       |
| P | Q9U6A0 | CC | Transports one Ca <sup>2+</sup> and 1 K <sup>+</sup> in exchange for 4 Na <sup>+</sup> .                                                                                       |
| P | Q9U6A0 | DE | Na <sup>+</sup> /K <sup>+</sup> /Ca <sup>2+</sup> -exchange protein Nckx30C;                                                                                                   |
| P | Q9U6A0 | DE | Na <sup>+</sup> /K <sup>+</sup> /Ca <sup>2+</sup> -exchange protein Nckx30C;                                                                                                   |
| P | Q9U6A0 | DE | Na <sup>+</sup> /K <sup>+</sup> /Ca <sup>2+</sup> -exchange protein Nckx30C;                                                                                                   |
| P | Q9U6A0 | DE | Sodium/potassium/calcium exchanger Nckx30C;                                                                                                                                    |
| P | Q9U6A0 | DE | Sodium/potassium/calcium exchanger Nckx30C;                                                                                                                                    |
| P | Q9U6A0 | DE | Sodium/potassium/calcium exchanger Nckx30C;                                                                                                                                    |
| P | Q9U6A0 | DR | calcium, potassium:sodium antiporter activity                                                                                                                                  |
| P | Q9U6A0 | DR | calcium, potassium:sodium antiporter activity                                                                                                                                  |
| P | Q9U6A0 | DR | calcium, potassium:sodium antiporter activity                                                                                                                                  |
| P | Q9UA35 | CC | Employs a 2:1 sodium/nucleoside ratio                                                                                                                                          |
| P | Q9UA35 | CC | Employs a 2:1 sodium/nucleoside ratio                                                                                                                                          |
| P | Q9UA35 | CC | Exhibits the transport characteristics of the nucleoside transport system cib or N3 subtype (N3/cib) (with marked transport of both thymidine and inosine)                     |
| P | Q9UA35 | CC | Sodium-dependent, pyrimidine- and purine-selective                                                                                                                             |
| P | Q9UA35 | DE | Concentrative Na <sup>+</sup> -nucleoside cotransporter 3;                                                                                                                     |
| P | Q9UA35 | DR | nucleoside:sodium symporter activity                                                                                                                                           |
| P | Q9UA35 | DR | nucleoside:sodium symporter activity                                                                                                                                           |
| P | Q9UAC2 | DE | Folate/methotrexate transporter FT1;                                                                                                                                           |
| P | Q9UBN4 | CC | Acts as a cell-cell contact-dependent endothelial calcium entry channel                                                                                                        |
| P | Q9UBN4 | CC | Form a receptor-activated non-selective calcium permeant cation channel                                                                                                        |
| P | Q9UBN4 | CC | May also be activated by intracellular calcium store depletion.                                                                                                                |
| P | Q9UBN4 | DR | store-operated calcium channel activity                                                                                                                                        |
| P | Q9UBX3 | DE | Mitochondrial dicarboxylate carrier;                                                                                                                                           |
| P | Q9UBY0 | CC | major proton extruding system driven by the inward sodium ion chemical gradient                                                                                                |
| P | Q9UBY0 | CC | Seems to play an important role in colonic sodium absorption.                                                                                                                  |
| P | Q9UBY0 | DE | Na <sup>+</sup> /H <sup>+</sup> exchanger 2;                                                                                                                                   |

|   |        |    |                                                                                                                                                                                                                                                                                                                                                                                                                  |
|---|--------|----|------------------------------------------------------------------------------------------------------------------------------------------------------------------------------------------------------------------------------------------------------------------------------------------------------------------------------------------------------------------------------------------------------------------|
| P | Q9UBY0 | DE | Sodium/hydrogen exchanger 2;                                                                                                                                                                                                                                                                                                                                                                                     |
| P | Q9UBY0 | DR | sodium:hydrogen antiporter activity                                                                                                                                                                                                                                                                                                                                                                              |
| P | Q9UGH3 | CC | Mediates electrogenic uptake of vitamin C, with a stoichiometry of 2 Na+ for each ascorbate.                                                                                                                                                                                                                                                                                                                     |
| P | Q9UGH3 | CC | Mediates electrogenic uptake of vitamin C, with a stoichiometry of 2 Na+ for each ascorbate.                                                                                                                                                                                                                                                                                                                     |
| P | Q9UGH3 | CC | Sodium/ascorbate cotransporter                                                                                                                                                                                                                                                                                                                                                                                   |
| P | Q9UGH3 | CC | Sodium/ascorbate cotransporter                                                                                                                                                                                                                                                                                                                                                                                   |
| P | Q9UGH3 | DE | Na+/L-ascorbic acid transporter 2;                                                                                                                                                                                                                                                                                                                                                                               |
| P | Q9UGH3 | DE | Na+/L-ascorbic acid transporter 2;                                                                                                                                                                                                                                                                                                                                                                               |
| P | Q9UGH3 | DE | Sodium-dependent vitamin C transporter 2;                                                                                                                                                                                                                                                                                                                                                                        |
| P | Q9UGH3 | DE | Sodium-dependent vitamin C transporter 2;                                                                                                                                                                                                                                                                                                                                                                        |
| P | Q9UGH3 | DR | sodium-dependent L-ascorbate transmembrane transporter activity                                                                                                                                                                                                                                                                                                                                                  |
| P | Q9UGH3 | DR | sodium-dependent L-ascorbate transmembrane transporter activity                                                                                                                                                                                                                                                                                                                                                  |
| P | Q9UGH3 | DR | sodium-dependent multivitamin transmembrane transporter activity                                                                                                                                                                                                                                                                                                                                                 |
| P | Q9UGI6 | CC | forms a voltage-independent potassium channel activated by intracellular calcium                                                                                                                                                                                                                                                                                                                                 |
| P | Q9UGQ3 | CC | Facilitative glucose transporter; binds cytochalasin B with low affinity.                                                                                                                                                                                                                                                                                                                                        |
| P | Q9UGQ3 | DE | Glucose transporter type 6;                                                                                                                                                                                                                                                                                                                                                                                      |
| P | Q9UGQ3 | DE | Glucose transporter type 9;                                                                                                                                                                                                                                                                                                                                                                                      |
| P | Q9UGQ3 | DE | Solute carrier family 2, facilitated glucose transporter member 6;                                                                                                                                                                                                                                                                                                                                               |
| P | Q9UGQ3 | DR | D-glucose transmembrane transporter activity                                                                                                                                                                                                                                                                                                                                                                     |
| P | Q9UHC3 | CC | Cation channel with high affinity for sodium, which is gated by extracellular protons and inhibited by the diuretic amiloride                                                                                                                                                                                                                                                                                    |
| P | Q9UHC3 | DE | Testis sodium channel 1;                                                                                                                                                                                                                                                                                                                                                                                         |
| P | Q9UHC3 | DR | ligand-gated sodium channel activity                                                                                                                                                                                                                                                                                                                                                                             |
| P | Q9UHI7 | CC | Mediates electrogenic uptake of vitamin C, with a stoichiometry of 2 Na+ for each ascorbate.                                                                                                                                                                                                                                                                                                                     |
| P | Q9UHI7 | CC | Mediates electrogenic uptake of vitamin C, with a stoichiometry of 2 Na+ for each ascorbate.                                                                                                                                                                                                                                                                                                                     |
| P | Q9UHI7 | CC | Sodium/ascorbate cotransporter                                                                                                                                                                                                                                                                                                                                                                                   |
| P | Q9UHI7 | CC | Sodium/ascorbate cotransporter                                                                                                                                                                                                                                                                                                                                                                                   |
| P | Q9UHI7 | DE | Na+/L-ascorbic acid transporter 1;                                                                                                                                                                                                                                                                                                                                                                               |
| P | Q9UHI7 | DE | Na+/L-ascorbic acid transporter 1;                                                                                                                                                                                                                                                                                                                                                                               |
| P | Q9UHI7 | DE | Sodium-dependent vitamin C transporter 1;                                                                                                                                                                                                                                                                                                                                                                        |
| P | Q9UHI7 | DE | Sodium-dependent vitamin C transporter 1;                                                                                                                                                                                                                                                                                                                                                                        |
| P | Q9UHI7 | DR | L-ascorbate:sodium symporter activity                                                                                                                                                                                                                                                                                                                                                                            |
| P | Q9UHI7 | DR | L-ascorbate:sodium symporter activity                                                                                                                                                                                                                                                                                                                                                                            |
| P | Q9UHI7 | DR | sodium-dependent L-ascorbate transmembrane transporter activity                                                                                                                                                                                                                                                                                                                                                  |
| P | Q9UHI7 | DR | sodium-dependent L-ascorbate transmembrane transporter activity                                                                                                                                                                                                                                                                                                                                                  |
| P | Q9UHW9 | CC | Mediates electroneutral potassium-chloride cotransport                                                                                                                                                                                                                                                                                                                                                           |
| P | Q9UHW9 | DE | Electroneutral potassium-chloride cotransporter 3;                                                                                                                                                                                                                                                                                                                                                               |
| P | Q9UHW9 | DR | potassium:chloride symporter activity                                                                                                                                                                                                                                                                                                                                                                            |
| P | Q9UHW9 | DR | potassium:chloride symporter activity                                                                                                                                                                                                                                                                                                                                                                            |
| P | Q9UI33 | CC | Assuming opened or closed conformations in response to the voltage difference across the membrane, the protein forms a sodium-selective channel through which sodium ions may pass in accordance with their electrochemical gradient                                                                                                                                                                             |
| P | Q9UI33 | CC | It is a tetrodotoxin-resistant sodium channel isoform                                                                                                                                                                                                                                                                                                                                                            |
| P | Q9UI33 | CC | This protein mediates the voltage-dependent sodium ion permeability of excitable membranes                                                                                                                                                                                                                                                                                                                       |
| P | Q9UI33 | DE | Peripheral nerve sodium channel 5;                                                                                                                                                                                                                                                                                                                                                                               |
| P | Q9UI33 | DE | Sensory neuron sodium channel 2;                                                                                                                                                                                                                                                                                                                                                                                 |
| P | Q9UI33 | DE | Sodium channel protein type 11 subunit alpha;                                                                                                                                                                                                                                                                                                                                                                    |
| P | Q9UI33 | DE | Sodium channel protein type XI subunit alpha;                                                                                                                                                                                                                                                                                                                                                                    |
| P | Q9UI33 | DE | Voltage-gated sodium channel subunit alpha Nav1.9;                                                                                                                                                                                                                                                                                                                                                               |
| P | Q9UI33 | DR | voltage-gated sodium channel activity                                                                                                                                                                                                                                                                                                                                                                            |
| P | Q9UI40 | CC | Critical component of the visual transduction cascade, controlling the calcium concentration of outer segments during light and darkness<br>Light causes a rapid lowering of cytosolic free calcium in the outer segment of both retinal rod and cone photoreceptors and the light-induced lowering of calcium is caused by extrusion via this protein which plays a key role in the process of light adaptation |
| P | Q9UI40 | CC | Transports 1 Ca2+ and 1 K+ in exchange for 4 Na+.                                                                                                                                                                                                                                                                                                                                                                |
| P | Q9UI40 | CC | Transports 1 Ca2+ and 1 K+ in exchange for 4 Na+.                                                                                                                                                                                                                                                                                                                                                                |
| P | Q9UI40 | CC | Transports 1 Ca2+ and 1 K+ in exchange for 4 Na+.                                                                                                                                                                                                                                                                                                                                                                |
| P | Q9UI40 | DE | Na+/K+/Ca2+-exchange protein 2;                                                                                                                                                                                                                                                                                                                                                                                  |
| P | Q9UI40 | DE | Na+/K+/Ca2+-exchange protein 2;                                                                                                                                                                                                                                                                                                                                                                                  |

|   |         |    |                                                                                                                                                                                                   |
|---|---------|----|---------------------------------------------------------------------------------------------------------------------------------------------------------------------------------------------------|
| P | Q9UI40  | DE | Na <sup>+</sup> /K <sup>+</sup> /Ca <sup>2+</sup> -exchange protein 2;                                                                                                                            |
| P | Q9UI40  | DE | Sodium/potassium/calcium exchanger 2;                                                                                                                                                             |
| P | Q9UI40  | DE | Sodium/potassium/calcium exchanger 2;                                                                                                                                                             |
| P | Q9UI40  | DE | Sodium/potassium/calcium exchanger 2;                                                                                                                                                             |
| P | Q9UI40  | DR | calcium, potassium:sodium antiporter activity                                                                                                                                                     |
| P | Q9UI40  | DR | calcium, potassium:sodium antiporter activity                                                                                                                                                     |
| P | Q9UI40  | DR | calcium, potassium:sodium antiporter activity                                                                                                                                                     |
| P | Q9UIX4  | CC | Probable potassium channel subunit                                                                                                                                                                |
| P | Q9UIX4  | DE | Potassium voltage-gated channel subfamily G member 1;                                                                                                                                             |
| P | Q9UIX4  | DE | Voltage-gated potassium channel subunit Kv6.1;                                                                                                                                                    |
| P | Q9UIX4  | DR | voltage-gated potassium channel activity                                                                                                                                                          |
| P | Q9UIJ96 | CC | Potassium channel subunit                                                                                                                                                                         |
| P | Q9UIJ96 | DE | Cardiac potassium channel subunit;                                                                                                                                                                |
| P | Q9UIJ96 | DE | Potassium voltage-gated channel subfamily G member 2;                                                                                                                                             |
| P | Q9UIJ96 | DE | Voltage-gated potassium channel subunit Kv6.2;                                                                                                                                                    |
| P | Q9UIJ96 | DR | delayed rectifier potassium channel activity                                                                                                                                                      |
| P | Q9UK17  | CC | Pore-forming (alpha) subunit of voltage-gated rapidly inactivating A-type potassium channels                                                                                                      |
| P | Q9UK17  | DE | Potassium voltage-gated channel subfamily D member 3;                                                                                                                                             |
| P | Q9UK17  | DE | Voltage-gated potassium channel subunit Kv4.3;                                                                                                                                                    |
| P | Q9UK17  | DR | A-type (transient outward) potassium channel activity                                                                                                                                             |
| P | Q9UKG4  | CC | Sodium/sulfate cotransporter that mediates sulfate reabsorption in the high endothelial venules (HEV).                                                                                            |
| P | Q9UKG4  | CC | Sodium/sulfate cotransporter that mediates sulfate reabsorption in the high endothelial venules (HEV).                                                                                            |
| P | Q9UKG4  | DE | Na <sup>+</sup> /sulfate cotransporter SUT-1;                                                                                                                                                     |
| P | Q9UKG4  | DE | Na <sup>+</sup> /sulfate cotransporter SUT-1;                                                                                                                                                     |
| P | Q9UKG4  | DR | sodium:sulfate symporter activity                                                                                                                                                                 |
| P | Q9UKG4  | DR | sodium:sulfate symporter activity                                                                                                                                                                 |
| P | Q9UL51  | CC | Hyperpolarization-activated ion channel exhibiting weak selectivity for potassium over sodium ions                                                                                                |
| P | Q9UL51  | DE | Potassium/sodium hyperpolarization-activated cyclic nucleotide-gated channel 2;                                                                                                                   |
| P | Q9UL51  | DR | voltage-gated potassium channel activity                                                                                                                                                          |
| P | Q9UL62  | CC | Has also been shown to be calcium-selective (By similarity)                                                                                                                                       |
| P | Q9UL62  | CC | May also be activated by intracellular calcium store depletion.                                                                                                                                   |
| P | Q9UL62  | CC | thought to form a receptor-activated non-selective calcium permeant cation channel                                                                                                                |
| P | Q9UL62  | DR | store-operated calcium channel activity                                                                                                                                                           |
| P | Q9ULD8  | CC | Pore-forming (alpha) subunit of voltage-gated potassium channel                                                                                                                                   |
| P | Q9ULD8  | DE | Ether-a-go-go-like potassium channel 2;                                                                                                                                                           |
| P | Q9ULD8  | DE | Potassium voltage-gated channel subfamily H member 3;                                                                                                                                             |
| P | Q9ULD8  | DE | Voltage-gated potassium channel subunit Kv12.2;                                                                                                                                                   |
| P | Q9ULD8  | DR | voltage-gated potassium channel activity                                                                                                                                                          |
| P | Q9ULF5  | DE | Zinc transporter ZIP10;                                                                                                                                                                           |
| P | Q9ULS6  | CC | Potassium channel subunit                                                                                                                                                                         |
| P | Q9ULS6  | DE | Delayed-rectifier K <sup>+</sup> channel alpha subunit 2;                                                                                                                                         |
| P | Q9ULS6  | DE | Potassium voltage-gated channel subfamily S member 2;                                                                                                                                             |
| P | Q9ULS6  | DE | Voltage-gated potassium channel subunit Kv9.2;                                                                                                                                                    |
| P | Q9ULS6  | DR | voltage-gated potassium channel activity                                                                                                                                                          |
| P | Q9UN76  | CC | Mediates the uptake of a broad range of neutral and cationic amino acids (with the exception of proline) in a Na <sup>+</sup> /Cl <sup>-</sup> -dependent manner.                                 |
| P | Q9UN76  | DE | Sodium- and chloride-dependent neutral and basic amino acid transporter B(0+);                                                                                                                    |
| P | Q9UN76  | DR | neurotransmitter:sodium symporter activity                                                                                                                                                        |
| P | Q9UN88  | CC | GABA, the major inhibitory neurotransmitter in the vertebrate brain, mediates neuronal inhibition by binding to the GABA/benzodiazepine receptor and opening an integral chloride channel.        |
| P | Q9UN88  | DR | chloride channel activity                                                                                                                                                                         |
| P | Q9UNX9  | CC | Inward rectifier potassium channels are characterized by a greater tendency to allow potassium to flow into the cell rather than out of it                                                        |
| P | Q9UNX9  | CC | Their voltage dependence is regulated by the concentration of extracellular potassium; as external potassium is raised, the voltage range of the channel opening shifts to more positive voltages |
| P | Q9UNX9  | DE | ATP-sensitive inward rectifier potassium channel 14;                                                                                                                                              |
| P | Q9UNX9  | DE | Inward rectifier K <sup>+</sup> channel Kir2.4;                                                                                                                                                   |
| P | Q9UNX9  | DE | Potassium channel, inwardly rectifying subfamily J member 14;                                                                                                                                     |
| P | Q9UNX9  | DR | inward rectifier potassium channel activity                                                                                                                                                       |

|   |        |    |                                                                                                                                                                                                                                   |
|---|--------|----|-----------------------------------------------------------------------------------------------------------------------------------------------------------------------------------------------------------------------------------|
| P | Q9UP95 | CC | mediates electroneutral potassium-chloride cotransport when activated by cell membrane depolarization                                                                                                                             |
| P | Q9UP95 | DE | Electroneutral potassium-chloride cotransporter 1;                                                                                                                                                                                |
| P | Q9UP95 | DR | potassium:chloride symporter activity                                                                                                                                                                                             |
| P | Q9UP95 | DR | potassium:chloride symporter activity                                                                                                                                                                                             |
| P | Q9UPR5 | CC | Ca2+ is extruded from the cell during relaxation so as to prevent overloading of intracellular stores (By similarity).                                                                                                            |
| P | Q9UPR5 | CC | Rapidly transports Ca2+ during excitation-contraction coupling                                                                                                                                                                    |
| P | Q9UPR5 | DE | Na+/Ca2+-exchange protein 2;                                                                                                                                                                                                      |
| P | Q9UPR5 | DE | Na+/Ca2+-exchange protein 2;                                                                                                                                                                                                      |
| P | Q9UPR5 | DE | Sodium/calcium exchanger 2;                                                                                                                                                                                                       |
| P | Q9UPR5 | DE | Sodium/calcium exchanger 2;                                                                                                                                                                                                       |
| P | Q9UPR5 | DR | calcium:sodium antiporter activity                                                                                                                                                                                                |
| P | Q9UPR5 | DR | calcium:sodium antiporter activity                                                                                                                                                                                                |
| P | Q9UPY5 | CC | Sodium-independent, high-affinity exchange of anionic amino acids with high specificity for anionic form of cystine and glutamate.                                                                                                |
| P | Q9UPY5 | CC | Sodium-independent, high-affinity exchange of anionic amino acids with high specificity for anionic form of cystine and glutamate.                                                                                                |
| P | Q9UPY5 | DE | Cystine/glutamate transporter;                                                                                                                                                                                                    |
| P | Q9UPY5 | DE | Cystine/glutamate transporter;                                                                                                                                                                                                    |
| P | Q9UPY5 | DR | cystine:glutamate antiporter activity                                                                                                                                                                                             |
| P | Q9UPY5 | DR | cystine:glutamate antiporter activity                                                                                                                                                                                             |
| P | Q9UQ05 | CC | Pore-forming (alpha) subunit of voltage-gated potassium channel                                                                                                                                                                   |
| P | Q9UQ05 | DE | Ether-a-go-go-like potassium channel 1;                                                                                                                                                                                           |
| P | Q9UQ05 | DE | Potassium voltage-gated channel subfamily H member 4;                                                                                                                                                                             |
| P | Q9UQ05 | DE | Voltage-gated potassium channel subunit Kv12.3;                                                                                                                                                                                   |
| P | Q9UQ05 | DR | voltage-gated potassium channel activity                                                                                                                                                                                          |
| P | Q9UQC9 | CC | Play a role in modulating chloride current across the plasma membrane in a calcium-dependent manner, and cell adhesion                                                                                                            |
| P | Q9UQC9 | DR | chloride channel activity                                                                                                                                                                                                         |
| P | Q9UQD0 | CC | Assuming opened or closed conformations in response to the voltage difference across the membrane, the protein forms a sodium-selective channel through which Na+ ions may pass in accordance with their electrochemical gradient |
| P | Q9UQD0 | CC | Mediates the voltage-dependent sodium ion permeability of excitable membranes                                                                                                                                                     |
| P | Q9UQD0 | DE | Sodium channel protein type 8 subunit alpha;                                                                                                                                                                                      |
| P | Q9UQD0 | DE | Sodium channel protein type VIII subunit alpha;                                                                                                                                                                                   |
| P | Q9UQD0 | DE | Voltage-gated sodium channel subunit alpha Nav1.6;                                                                                                                                                                                |
| P | Q9UQD0 | DR | voltage-gated sodium channel activity                                                                                                                                                                                             |
| P | Q9URY6 | CC | Involved in active transport of urea (By similarity).                                                                                                                                                                             |
| P | Q9URY6 | DE | Probable urea active transporter 3;                                                                                                                                                                                               |
| P | Q9USV7 | CC | Mobilizes stored copper from the vacuole to the cytoplasm under conditions of copper limitation.                                                                                                                                  |
| P | Q9USV7 | DE | Copper transport protein ctr6;                                                                                                                                                                                                    |
| P | Q9USV7 | DE | Copper transporter 6;                                                                                                                                                                                                             |
| P | Q9USV7 | DR | copper ion transmembrane transporter activity                                                                                                                                                                                     |
| P | Q9UTN1 | CC | Transports oxaloacetate and sulfate (By similarity).                                                                                                                                                                              |
| P | Q9UTN1 | DE | Mitochondrial oxaloacetate transport protein;                                                                                                                                                                                     |
| P | Q9UZU7 | CC | Part of the ABC transporter complex PstSACB involved in phosphate import                                                                                                                                                          |
| P | Q9UZU7 | DE | ABC phosphate transporter;                                                                                                                                                                                                        |
| P | Q9UZU7 | DE | Phosphate import ATP-binding protein PstB;                                                                                                                                                                                        |
| P | Q9UZU7 | DE | Phosphate-transporting ATPase;                                                                                                                                                                                                    |
| P | Q9UZU7 | DR | inorganic phosphate transmembrane transporter activity                                                                                                                                                                            |
| P | Q9UZU7 | DR | phosphate transmembrane-transporting ATPase activity                                                                                                                                                                              |
| P | Q9V297 | DR | maltose transmembrane transporter activity                                                                                                                                                                                        |
| P | Q9V2C0 | CC | part of the ABC transporter complex wtpABC involved in molybdate/tungstate import                                                                                                                                                 |
| P | Q9V2C0 | DE | Molybdate/tungstate import ATP-binding protein WtpC;                                                                                                                                                                              |
| P | Q9V2C0 | DR | molybdate transmembrane-transporting ATPase activity                                                                                                                                                                              |
| P | Q9V2C1 | CC | part of the ABC transporter complex wtpABC involved in molybdate/tungstate import                                                                                                                                                 |
| P | Q9V2C1 | DE | Molybdate/tungstate transport system permease protein wtpB;                                                                                                                                                                       |
| P | Q9V2C4 | CC | Binds tungstate and molybdate (By similarity).                                                                                                                                                                                    |
| P | Q9V2C4 | CC | part of the ABC transporter complex wtpABC involved in molybdate/tungstate import                                                                                                                                                 |
| P | Q9V2C4 | DE | Molybdate/tungstate-binding protein wtpA;                                                                                                                                                                                         |
| P | Q9V5Z7 | CC | Forms a water-specific channel (By similarity).                                                                                                                                                                                   |
| P | Q9V5Z7 | DR | water channel activity                                                                                                                                                                                                            |
| P | Q9V7S5 | CC | May be an inorganic phosphate cotransporter.                                                                                                                                                                                      |
| P | Q9V7S5 | DE | Putative inorganic phosphate cotransporter;                                                                                                                                                                                       |

|   |        |    |                                                                                                                                                                                                                                   |
|---|--------|----|-----------------------------------------------------------------------------------------------------------------------------------------------------------------------------------------------------------------------------------|
| P | Q9V7S5 | DR | inorganic phosphate transmembrane transporter activity                                                                                                                                                                            |
| P | Q9VR07 | CC | Ine negatively regulates neuronal sodium channels                                                                                                                                                                                 |
| P | Q9VR07 | DE | Sodium- and chloride-dependent GABA transporter ine;                                                                                                                                                                              |
| P | Q9VR07 | DE | Sodium- and chloride-dependent GABA transporter ine;                                                                                                                                                                              |
| P | Q9VR07 | DR | neurotransmitter:sodium symporter activity                                                                                                                                                                                        |
| P | Q9VVT2 | CC | Affinity for substrates is citrate > succinate > pyruvate                                                                                                                                                                         |
| P | Q9VVT2 | CC | Cation-independent electroneutral transporter (not associated with membrane depolarization) of a variety of tricarboxylic and dicarboxylic acid-cycle intermediates                                                               |
| P | Q9VVT2 | CC | Transport mechanism that is not coupled to Na+, K+, or Cl(-)                                                                                                                                                                      |
| P | Q9VVT2 | DR | citrate transmembrane transporter activity                                                                                                                                                                                        |
| P | Q9W4C5 | CC | Unusual broad substrate spectrum amino acid:sodium cotransporter that promotes absorption of the D isomers of essential amino acids                                                                                               |
| P | Q9W4C5 | DE | Sodium-dependent nutrient amino acid transporter 1;                                                                                                                                                                               |
| P | Q9W4C5 | DR | neurotransmitter:sodium symporter activity                                                                                                                                                                                        |
| P | Q9W4C5 | DR | sodium:amino acid symporter activity                                                                                                                                                                                              |
| P | Q9WTR6 | CC | Sodium-independent, high-affinity exchange of anionic amino acids with high specificity for anionic form of cystine and glutamate.                                                                                                |
| P | Q9WTR6 | CC | Sodium-independent, high-affinity exchange of anionic amino acids with high specificity for anionic form of cystine and glutamate.                                                                                                |
| P | Q9WTR6 | DE | Cystine/glutamate transporter;                                                                                                                                                                                                    |
| P | Q9WTR6 | DE | Cystine/glutamate transporter;                                                                                                                                                                                                    |
| P | Q9WTU3 | CC | Assuming opened or closed conformations in response to the voltage difference across the membrane, the protein forms a sodium-selective channel through which Na+ ions may pass in accordance with their electrochemical gradient |
| P | Q9WTU3 | CC | Mediates the voltage-dependent sodium ion permeability of excitable membranes                                                                                                                                                     |
| P | Q9WTU3 | DE | Sodium channel protein type 8 subunit alpha;                                                                                                                                                                                      |
| P | Q9WTU3 | DE | Sodium channel protein type VIII subunit alpha;                                                                                                                                                                                   |
| P | Q9WTU3 | DE | Voltage-gated sodium channel subunit alpha Nav1.6;                                                                                                                                                                                |
| P | Q9WTU3 | DR | voltage-gated sodium channel activity                                                                                                                                                                                             |
| P | Q9WTW7 | CC | Mediates electrogenic uptake of vitamin C, with a stoichiometry of 2 Na+ for each ascorbate.                                                                                                                                      |
| P | Q9WTW7 | CC | Mediates electrogenic uptake of vitamin C, with a stoichiometry of 2 Na+ for each ascorbate.                                                                                                                                      |
| P | Q9WTW7 | CC | Sodium/ascorbate cotransporter                                                                                                                                                                                                    |
| P | Q9WTW7 | CC | Sodium/ascorbate cotransporter                                                                                                                                                                                                    |
| P | Q9WTW7 | DE | Na+/L-ascorbic acid transporter 1;                                                                                                                                                                                                |
| P | Q9WTW7 | DE | Na+/L-ascorbic acid transporter 1;                                                                                                                                                                                                |
| P | Q9WTW7 | DE | Sodium-dependent vitamin C transporter 1;                                                                                                                                                                                         |
| P | Q9WTW7 | DE | Sodium-dependent vitamin C transporter 1;                                                                                                                                                                                         |
| P | Q9WTW7 | DR | L-ascorbate:sodium symporter activity                                                                                                                                                                                             |
| P | Q9WTW7 | DR | L-ascorbate:sodium symporter activity                                                                                                                                                                                             |
| P | Q9WTW7 | DR | L-ascorbic acid transporter activity                                                                                                                                                                                              |
| P | Q9WTY4 | CC | Forms a water-specific channel                                                                                                                                                                                                    |
| P | Q9WTY4 | DR | water channel activity                                                                                                                                                                                                            |
| P | Q9WU38 | CC | Controls the reabsorption of sodium in kidney, colon, lung and sweat glands                                                                                                                                                       |
| P | Q9WU38 | CC | Sodium permeable non-voltage-sensitive ion channel inhibited by the diuretic amiloride                                                                                                                                            |
| P | Q9WU38 | DE | Amiloride-sensitive sodium channel subunit beta;                                                                                                                                                                                  |
| P | Q9WU38 | DE | Epithelial Na+ channel subunit beta;                                                                                                                                                                                              |
| P | Q9WU38 | DE | Nonvoltage-gated sodium channel 1 subunit beta;                                                                                                                                                                                   |
| P | Q9WU38 | DR | ligand-gated sodium channel activity                                                                                                                                                                                              |
| P | Q9WU39 | CC | Controls the reabsorption of sodium in kidney, colon, lung and sweat glands                                                                                                                                                       |
| P | Q9WU39 | CC | Sodium permeable non-voltage-sensitive ion channel inhibited by the diuretic amiloride                                                                                                                                            |
| P | Q9WU39 | DE | Amiloride-sensitive sodium channel subunit gamma;                                                                                                                                                                                 |
| P | Q9WU39 | DE | Epithelial Na+ channel subunit gamma;                                                                                                                                                                                             |
| P | Q9WU39 | DE | Nonvoltage-gated sodium channel 1 subunit gamma;                                                                                                                                                                                  |
| P | Q9WU39 | DR | ligand-gated sodium channel activity                                                                                                                                                                                              |
| P | Q9WUB7 | CC | Chloride channels have several functions including the regulation of cell volume; membrane potential stabilization, signal transduction and transepithelial transport                                                             |
| P | Q9WUB7 | CC | may be the basolateral chloride channel mediating net chloride absorption in CTAL cells                                                                                                                                           |
| P | Q9WUB7 | CC | Voltage-gated chloride channel                                                                                                                                                                                                    |
| P | Q9WUB7 | DE | Chloride channel Ka;                                                                                                                                                                                                              |
| P | Q9WUB7 | DE | Chloride channel protein CIC-Ka;                                                                                                                                                                                                  |
| P | Q9WUB7 | DR | voltage-gated chloride channel activity                                                                                                                                                                                           |
| P | Q9WVC8 | CC | Chloride/bicarbonate exchanger                                                                                                                                                                                                    |
| P | Q9WVC8 | DE | Chloride anion exchanger;                                                                                                                                                                                                         |

|   |        |    |                                                                                                                                                                                           |
|---|--------|----|-------------------------------------------------------------------------------------------------------------------------------------------------------------------------------------------|
| P | Q9WVD4 | CC | Functions as antiport system and exchanges chloride ions against protons                                                                                                                  |
| P | Q9WVD4 | CC | Proton-coupled chloride transporter                                                                                                                                                       |
| P | Q9WVD4 | DE | Chloride channel protein 5;                                                                                                                                                               |
| P | Q9WVD4 | DE | Chloride transporter CIC-5;                                                                                                                                                               |
| P | Q9WVD5 | CC | Ornithine transport across inner mitochondrial membrane, from the cytoplasm to the matrix.                                                                                                |
| P | Q9WVD5 | DE | Mitochondrial ornithine transporter 1;                                                                                                                                                    |
| P | Q9WVL3 | CC | May mediate K <sup>+</sup> uptake into Deiters' cells in the cochlea and contribute to K <sup>+</sup> recycling in the inner ear                                                          |
| P | Q9WVL3 | CC | Mediates electroneutral potassium-chloride cotransport when activated by cell swelling (By similarity)                                                                                    |
| P | Q9WVL3 | DE | Electroneutral potassium-chloride cotransporter 4;                                                                                                                                        |
| P | Q9WVL3 | DR | cation:chloride symporter activity                                                                                                                                                        |
| P | Q9WXN4 | DE | Oligopeptide ABC transporter, ATP-binding protein;                                                                                                                                        |
| P | Q9WXN5 | DE | Oligopeptide ABC transporter, ATP-binding protein;                                                                                                                                        |
| P | Q9WXN6 | DE | Oligopeptide ABC transporter, permease protein;                                                                                                                                           |
| P | Q9WXN7 | DE | Oligopeptide ABC transporter, permease protein;                                                                                                                                           |
| P | Q9WXN8 | DE | Oligopeptide ABC transporter, periplasmic oligopeptide-binding protein;                                                                                                                   |
| P | Q9WXS6 | DE | Oligopeptide ABC transporter, periplasmic oligopeptide-binding protein;                                                                                                                   |
| P | Q9WXS7 | DE | Oligopeptide ABC transporter, permease protein;                                                                                                                                           |
| P | Q9WXS8 | DE | Oligopeptide ABC transporter, permease protein;                                                                                                                                           |
| P | Q9WXS9 | DE | Oligopeptide ABC transporter, ATP-binding protein;                                                                                                                                        |
| P | Q9WXT0 | DE | Oligopeptide ABC transporter, ATP-binding protein;                                                                                                                                        |
| P | Q9WXX0 | CC | Part of the ABC transporter complex RbsABCD involved in ribose import                                                                                                                     |
| P | Q9WXX0 | DE | Ribose import ATP-binding protein RbsA 1;                                                                                                                                                 |
| P | Q9WZ31 | CC | Mediates influx of magnesium ions (By similarity).                                                                                                                                        |
| P | Q9WZ31 | DE | Magnesium transport protein CorA;                                                                                                                                                         |
| P | Q9WZ31 | DR | cobalt ion transmembrane transporter activity                                                                                                                                             |
| P | Q9WZ31 | DR | magnesium ion transmembrane transporter activity                                                                                                                                          |
| P | Q9X051 | CC | Part of the ABC transporter complex RbsABCD involved in ribose import                                                                                                                     |
| P | Q9X051 | DE | Ribose import ATP-binding protein RbsA 2;                                                                                                                                                 |
| P | Q9X0F3 | DE | Oligopeptide ABC transporter, ATP-binding protein;                                                                                                                                        |
| P | Q9X0F4 | DE | Oligopeptide ABC transporter, ATP-binding protein;                                                                                                                                        |
| P | Q9X0F5 | DE | Oligopeptide ABC transporter, permease protein;                                                                                                                                           |
| P | Q9X0F6 | DE | Oligopeptide ABC transporter, permease protein;                                                                                                                                           |
| P | Q9X0F7 | DE | Oligopeptide ABC transporter, periplasmic oligopeptide-binding protein;                                                                                                                   |
| P | Q9X0U6 | DE | Oligopeptide ABC transporter, ATP-binding protein;                                                                                                                                        |
| P | Q9X0U7 | DE | Oligopeptide ABC transporter, ATP-binding protein;                                                                                                                                        |
| P | Q9X0U8 | DE | Oligopeptide ABC transporter, permease protein;                                                                                                                                           |
| P | Q9X0U9 | DE | Oligopeptide ABC transporter, permease protein;                                                                                                                                           |
| P | Q9X0V0 | DE | Oligopeptide ABC transporter, periplasmic oligopeptide-binding protein;                                                                                                                   |
| P | Q9X0Y8 | CC | Part of the ABC transporter complex PstSACB involved in phosphate import                                                                                                                  |
| P | Q9X0Y8 | DE | ABC phosphate transporter;                                                                                                                                                                |
| P | Q9X0Y8 | DE | Phosphate import ATP-binding protein PstB;                                                                                                                                                |
| P | Q9X0Y8 | DE | Phosphate-transporting ATPase;                                                                                                                                                            |
| P | Q9X0Y8 | DR | inorganic phosphate transmembrane transporter activity                                                                                                                                    |
| P | Q9X0Y8 | DR | phosphate transmembrane-transporting ATPase activity                                                                                                                                      |
| P | Q9X196 | CC | Part of the ABC transporter complex PotABCD involved in spermidine/putrescine import                                                                                                      |
| P | Q9X196 | CC | Part of the ABC transporter complex PotABCD involved in spermidine/putrescine import                                                                                                      |
| P | Q9X196 | DE | Spermidine/putrescine import ATP-binding protein PotA;                                                                                                                                    |
| P | Q9X196 | DE | Spermidine/putrescine import ATP-binding protein PotA;                                                                                                                                    |
| P | Q9X1E3 | CC | Glycerol enters the cell via the glycerol diffusion facilitator protein                                                                                                                   |
| P | Q9X1E3 | CC | This membrane protein facilitates the movement of glycerol across the cytoplasmic membrane (By similarity).                                                                               |
| P | Q9X1E3 | DE | Probable glycerol uptake facilitator protein;                                                                                                                                             |
| P | Q9X268 | DE | Oligopeptide ABC transporter, periplasmic oligopeptide-binding protein;                                                                                                                   |
| P | Q9X269 | DE | Oligopeptide ABC transporter, permease protein;                                                                                                                                           |
| P | Q9X270 | DE | Oligopeptide ABC transporter, permease protein;                                                                                                                                           |
| P | Q9X271 | DE | Oligopeptide ABC transporter, ATP-binding protein;                                                                                                                                        |
| P | Q9X272 | DE | Oligopeptide ABC transporter, ATP-binding protein;                                                                                                                                        |
| P | Q9X7P0 | DE | L-asparagine permease;                                                                                                                                                                    |
| P | Q9X7P0 | DE | L-asparagine transport protein;                                                                                                                                                           |
| P | Q9X8Z8 | CC | One of the components of the high-affinity ATP-driven potassium transport (or KDP) system, which catalyzes the hydrolysis of ATP coupled with the exchange of hydrogen and potassium ions |



|   |        |    |                                                                                                                                                                                                            |
|---|--------|----|------------------------------------------------------------------------------------------------------------------------------------------------------------------------------------------------------------|
| P | Q9X8Z8 | DE | Potassium-binding and translocating subunit C;                                                                                                                                                             |
| P | Q9X8Z8 | DE | Potassium-translocating ATPase C chain;                                                                                                                                                                    |
| P | Q9X8Z8 | DE | Potassium-transporting ATPase C chain;                                                                                                                                                                     |
| P | Q9X8Z8 | DR | potassium-transporting ATPase activity                                                                                                                                                                     |
| P | Q9X8Z9 | CC | One of the components of the high-affinity ATP-driven potassium transport (or KDP) system, which catalyzes the hydrolysis of ATP coupled with the exchange of hydrogen and potassium ions (By similarity). |
| P | Q9X8Z9 | DE | Potassium-binding and translocating subunit B;                                                                                                                                                             |
| P | Q9X8Z9 | DE | Potassium-translocating ATPase B chain;                                                                                                                                                                    |
| P | Q9X8Z9 | DE | Potassium-transporting ATPase B chain;                                                                                                                                                                     |
| P | Q9X8Z9 | DR | potassium-transporting ATPase activity                                                                                                                                                                     |
| P | Q9X900 | CC | One of the components of the high-affinity ATP-driven potassium transport (or KDP) system, which catalyzes the hydrolysis of ATP coupled with the exchange of hydrogen and potassium ions (By similarity). |
| P | Q9X900 | DE | Potassium-binding and translocating subunit A;                                                                                                                                                             |
| P | Q9X900 | DE | Potassium-translocating ATPase A chain;                                                                                                                                                                    |
| P | Q9X900 | DE | Potassium-transporting ATPase A chain;                                                                                                                                                                     |
| P | Q9X900 | DR | potassium-transporting ATPase activity                                                                                                                                                                     |
| P | Q9X929 | CC | Na <sup>+</sup> /H <sup>+</sup> antiporter that excludes sodium in exchange for external protons (By similarity)                                                                                           |
| P | Q9X929 | DE | Na <sup>+</sup> /H <sup>+</sup> antiporter nhaA 3;                                                                                                                                                         |
| P | Q9X929 | DE | Sodium/proton antiporter nhaA 3;                                                                                                                                                                           |
| P | Q9X9D2 | DE | Nucleoside triphosphate transport protein 2;                                                                                                                                                               |
| P | Q9XDA6 | CC | Involved in a zinc uptake transport system (Probable).                                                                                                                                                     |
| P | Q9XDA6 | DE | Zinc uptake system ATP-binding protein ZurA;                                                                                                                                                               |
| P | Q9XES1 | CC | This magnesium-dependent enzyme catalyzes the hydrolysis of ATP coupled with the translocation of calcium from the cytosol to an endomembrane compartment                                                  |
| P | Q9XES1 | DE | Calcium-transporting ATPase 4, endoplasmic reticulum-type;                                                                                                                                                 |
| P | Q9XES1 | DR | calcium-transporting ATPase activity                                                                                                                                                                       |
| P | Q9XFR0 | DE | Probable calcium-activated outward-rectifying potassium channel 3;                                                                                                                                         |
| P | Q9XFR0 | DR | potassium channel activity                                                                                                                                                                                 |
| P | Q9XTG4 | DR | calcium-transporting ATPase activity                                                                                                                                                                       |
| P | Q9Y257 | CC | Exhibits outward rectification in a physiological K <sup>+</sup> gradient and mild inward rectification in symmetrical K <sup>+</sup> conditions.                                                          |
| P | Q9Y257 | DE | Inward rectifying potassium channel protein TWIK-2;                                                                                                                                                        |
| P | Q9Y257 | DE | Potassium channel subfamily K member 6;                                                                                                                                                                    |
| P | Q9Y257 | DR | inward rectifier potassium channel activity                                                                                                                                                                |
| P | Q9Y289 | CC | Transports pantothenate, biotin and lipoate in the presence of sodium.                                                                                                                                     |
| P | Q9Y289 | DE | Na <sup>+</sup> -dependent multivitamin transporter;                                                                                                                                                       |
| P | Q9Y289 | DE | Sodium-dependent multivitamin transporter;                                                                                                                                                                 |
| P | Q9Y289 | DR | sodium-dependent multivitamin transmembrane transporter activity                                                                                                                                           |
| P | Q9Y2C5 | CC | May be involved in actively transporting phosphate into cells via Na <sup>+</sup> cotransport (By similarity).                                                                                             |
| P | Q9Y2C5 | CC | May be involved in actively transporting phosphate into cells via Na <sup>+</sup> cotransport (By similarity).                                                                                             |
| P | Q9Y2C5 | DE | Putative small intestine sodium-dependent phosphate transport protein;                                                                                                                                     |
| P | Q9Y2C5 | DE | Putative small intestine sodium-dependent phosphate transport protein;                                                                                                                                     |
| P | Q9Y2C5 | DR | sodium:phosphate symporter activity                                                                                                                                                                        |
| P | Q9Y2C5 | DR | sodium:phosphate symporter activity                                                                                                                                                                        |
| P | Q9Y2D2 | DE | UDP-N-acetylglucosamine transporter;                                                                                                                                                                       |
| P | Q9Y2D2 | DR | UDP-N-acetylglucosamine transmembrane transporter activity                                                                                                                                                 |
| P | Q9Y2E8 | CC | major proton extruding system driven by the inward sodium ion chemical gradient                                                                                                                            |
| P | Q9Y2E8 | DE | Na <sup>+</sup> /H <sup>+</sup> exchanger 8;                                                                                                                                                               |
| P | Q9Y2E8 | DE | Sodium/hydrogen exchanger 8;                                                                                                                                                                               |
| P | Q9Y2E8 | DR | sodium:hydrogen antiporter activity                                                                                                                                                                        |
| P | Q9Y2U2 | CC | Probable potassium channel subunit                                                                                                                                                                         |
| P | Q9Y2U2 | DE | Potassium channel subfamily K member 7;                                                                                                                                                                    |
| P | Q9Y2U2 | DR | potassium channel activity                                                                                                                                                                                 |
| P | Q9Y2W3 | DE | Proton-associated sugar transporter A;                                                                                                                                                                     |
| P | Q9Y345 | CC | Terminates the action of glycine by its high affinity sodium-dependent reuptake into presynaptic terminals                                                                                                 |
| P | Q9Y345 | CC | Terminates the action of glycine by its high affinity sodium-dependent reuptake into presynaptic terminals                                                                                                 |
| P | Q9Y345 | DE | Sodium- and chloride-dependent glycine transporter 2;                                                                                                                                                      |
| P | Q9Y345 | DE | Sodium- and chloride-dependent glycine transporter 2;                                                                                                                                                      |
| P | Q9Y345 | DR | glycine:sodium symporter activity                                                                                                                                                                          |

|   |        |    |                                                                                                                                                                                                                                      |
|---|--------|----|--------------------------------------------------------------------------------------------------------------------------------------------------------------------------------------------------------------------------------------|
| P | Q9Y345 | DR | glycine:sodium symporter activity                                                                                                                                                                                                    |
| P | Q9Y345 | DR | neurotransmitter:sodium symporter activity                                                                                                                                                                                           |
| P | Q9Y3Q4 | CC | Hyperpolarization-activated ion channel with very slow activation and inactivation exhibiting weak selectivity for potassium over sodium ions                                                                                        |
| P | Q9Y3Q4 | DE | Potassium/sodium hyperpolarization-activated cyclic nucleotide-gated channel 4;                                                                                                                                                      |
| P | Q9Y3Q4 | DR | voltage-gated potassium channel activity                                                                                                                                                                                             |
| P | Q9Y5Y9 | CC | Assuming opened or closed conformations in response to the voltage difference across the membrane, the protein forms a sodium-selective channel through which sodium ions may pass in accordance with their electrochemical gradient |
| P | Q9Y5Y9 | CC | It is a tetrodotoxin-resistant sodium channel isoform                                                                                                                                                                                |
| P | Q9Y5Y9 | CC | This protein mediates the voltage-dependent sodium ion permeability of excitable membranes                                                                                                                                           |
| P | Q9Y5Y9 | DE | Peripheral nerve sodium channel 3;                                                                                                                                                                                                   |
| P | Q9Y5Y9 | DE | Sodium channel protein type 10 subunit alpha;                                                                                                                                                                                        |
| P | Q9Y5Y9 | DE | Sodium channel protein type X subunit alpha;                                                                                                                                                                                         |
| P | Q9Y5Y9 | DE | Voltage-gated sodium channel subunit alpha Nav1.8;                                                                                                                                                                                   |
| P | Q9Y619 | CC | Ornithine transport across inner mitochondrial membrane, from the cytoplasm to the matrix.                                                                                                                                           |
| P | Q9Y619 | DE | Mitochondrial ornithine transporter 1;                                                                                                                                                                                               |
| P | Q9Y666 | CC | May mediate K <sup>+</sup> uptake into Deiters' cells in the cochlea and contribute to K <sup>+</sup> recycling in the inner ear                                                                                                     |
| P | Q9Y666 | CC | mediates electroneutral potassium-chloride cotransport when activated by cell stimulation                                                                                                                                            |
| P | Q9Y666 | DE | Electroneutral potassium-chloride cotransporter 4;                                                                                                                                                                                   |
| P | Q9Y666 | DR | potassium:chloride symporter activity                                                                                                                                                                                                |
| P | Q9Y666 | DR | potassium:chloride symporter activity                                                                                                                                                                                                |
| P | Q9Y696 | CC | Can insert into membranes and form poorly selective ion channels that may also transport chloride ions                                                                                                                               |
| P | Q9Y696 | DE | Chloride intracellular channel protein 4;                                                                                                                                                                                            |
| P | Q9Y696 | DE | Intracellular chloride ion channel protein p64H1;                                                                                                                                                                                    |
| P | Q9Y696 | DR | voltage-gated chloride channel activity                                                                                                                                                                                              |
| P | Q9Y6M5 | CC | May be involved in zinc transport out of the cell.                                                                                                                                                                                   |
| P | Q9Y6M5 | DE | Zinc transporter 1;                                                                                                                                                                                                                  |
| P | Q9Y6M5 | DR | zinc ion transmembrane transporter activity                                                                                                                                                                                          |
| P | Q9Y6M7 | CC | Electroneutral sodium- and bicarbonate-dependent cotransporter with a Na <sup>+</sup> :HCO <sub>3</sub> <sup>-</sup> 1:1 stoichiometry                                                                                               |
| P | Q9Y6M7 | CC | Electroneutral sodium- and bicarbonate-dependent cotransporter with a Na <sup>+</sup> :HCO <sub>3</sub> <sup>-</sup> 1:1 stoichiometry                                                                                               |
| P | Q9Y6M7 | CC | May also have an associated sodium channel activity.                                                                                                                                                                                 |
| P | Q9Y6M7 | CC | Regulates intracellular pH and may play a role in bicarbonate salvage in secretory epithelia                                                                                                                                         |
| P | Q9Y6M7 | DE | Bicarbonate transporter;                                                                                                                                                                                                             |
| P | Q9Y6M7 | DR | sodium:bicarbonate symporter activity                                                                                                                                                                                                |
| P | Q9Y6M7 | DR | sodium:bicarbonate symporter activity                                                                                                                                                                                                |
| P | Q9Y6R1 | CC | Electrogenic sodium/bicarbonate cotransporter with a Na <sup>+</sup> :HCO <sub>3</sub> <sup>-</sup> stoichiometry varying from 1:2 to 1:3                                                                                            |
| P | Q9Y6R1 | CC | Electrogenic sodium/bicarbonate cotransporter with a Na <sup>+</sup> :HCO <sub>3</sub> <sup>-</sup> stoichiometry varying from 1:2 to 1:3                                                                                            |
| P | Q9Y6R1 | CC | May regulate bicarbonate influx/efflux at the basolateral membrane of cells and regulate intracellular pH.                                                                                                                           |
| P | Q9Y6R1 | DE | Na <sup>+</sup> /HCO <sub>3</sub> <sup>-</sup> cotransporter;                                                                                                                                                                        |
| P | Q9Y6R1 | DR | sodium:bicarbonate symporter activity                                                                                                                                                                                                |
| P | Q9Y6R1 | DR | sodium:bicarbonate symporter activity                                                                                                                                                                                                |
| P | Q9YBZ6 | DR | copper-exporting ATPase activity                                                                                                                                                                                                     |
| P | Q9YG51 | CC | Part of the ABC transporter complex PstSACB involved in phosphate import                                                                                                                                                             |
| P | Q9YG51 | DE | ABC phosphate transporter;                                                                                                                                                                                                           |
| P | Q9YG51 | DE | Phosphate import ATP-binding protein PstB;                                                                                                                                                                                           |
| P | Q9YG51 | DE | Phosphate-transporting ATPase;                                                                                                                                                                                                       |
| P | Q9YG51 | DR | phosphate transmembrane-transporting ATPase activity                                                                                                                                                                                 |
| P | Q9Z0V1 | CC | Pore-forming (alpha) subunit of voltage-gated rapidly inactivating A-type potassium channels                                                                                                                                         |
| P | Q9Z0V1 | DE | Potassium voltage-gated channel subfamily D member 3;                                                                                                                                                                                |
| P | Q9Z0V1 | DE | Voltage-gated potassium channel subunit Kv4.3;                                                                                                                                                                                       |
| P | Q9Z0V2 | CC | Pore-forming (alpha) subunit of voltage-gated rapidly inactivating A-type potassium channels                                                                                                                                         |
| P | Q9Z0V2 | DE | Potassium voltage-gated channel subfamily D member 2;                                                                                                                                                                                |

|   |        |    |                                                                                                                                                                                                                                                   |
|---|--------|----|---------------------------------------------------------------------------------------------------------------------------------------------------------------------------------------------------------------------------------------------------|
| P | Q9Z0V2 | DE | Voltage-gated potassium channel subunit Kv4.2;                                                                                                                                                                                                    |
| P | Q9Z1Q5 | CC | Can insert into membranes and form chloride ion channels                                                                                                                                                                                          |
| P | Q9Z1Q5 | DE | Chloride intracellular channel protein 1;                                                                                                                                                                                                         |
| P | Q9Z1Q5 | DE | Nuclear chloride ion channel 27;                                                                                                                                                                                                                  |
| P | Q9Z1Q5 | DR | voltage-gated chloride channel activity                                                                                                                                                                                                           |
| P | Q9Z2J0 | CC | Mediates electrogenic uptake of vitamin C, with a stoichiometry of 2 Na+ for each ascorbate (By similarity).                                                                                                                                      |
| P | Q9Z2J0 | CC | Mediates electrogenic uptake of vitamin C, with a stoichiometry of 2 Na+ for each ascorbate (By similarity).                                                                                                                                      |
| P | Q9Z2J0 | CC | Sodium/ascorbate cotransporter                                                                                                                                                                                                                    |
| P | Q9Z2J0 | CC | Sodium/ascorbate cotransporter                                                                                                                                                                                                                    |
| P | Q9Z2J0 | DE | Na+/L-ascorbic acid transporter 1;                                                                                                                                                                                                                |
| P | Q9Z2J0 | DE | Na+/L-ascorbic acid transporter 1;                                                                                                                                                                                                                |
| P | Q9Z2J0 | DE | Sodium-dependent vitamin C transporter 1;                                                                                                                                                                                                         |
| P | Q9Z2J0 | DE | Sodium-dependent vitamin C transporter 1;                                                                                                                                                                                                         |
| P | Q9Z2J0 | DR | L-ascorbic acid transporter activity                                                                                                                                                                                                              |
| P | Q9Z2T1 | CC | Probable potassium channel subunit                                                                                                                                                                                                                |
| P | Q9Z2T1 | DE | Double-pore K+ channel 3;                                                                                                                                                                                                                         |
| P | Q9Z2T1 | DE | Neuromuscular two p domain potassium channel;                                                                                                                                                                                                     |
| P | Q9Z2T1 | DE | Potassium channel subfamily K member 7;                                                                                                                                                                                                           |
| P | Q9Z2T1 | DE | Putative potassium channel DP3;                                                                                                                                                                                                                   |
| P | Q9Z2T1 | DR | potassium channel activity                                                                                                                                                                                                                        |
| P | Q9Z2Z6 | DE | Carnitine/acylcarnitine translocase;                                                                                                                                                                                                              |
| P | Q9Z2Z6 | DE | Mitochondrial carnitine/acylcarnitine carrier protein;                                                                                                                                                                                            |
| P | Q9Z329 | CC | Isoform 3 has neither inositol 1,4,5-trisphosphate binding activity nor calcium releasing activity.                                                                                                                                               |
| P | Q9Z329 | CC | Receptor for inositol 1,4,5-trisphosphate, a second messenger that mediates the release of intracellular calcium                                                                                                                                  |
| P | Q9Z329 | DR | inositol 1,4,5-trisphosphate-sensitive calcium-release channel activity<br>part of a K+ efflux system which is required for the adaptation of K. menontii to alkaline pH as well as for the infection process during symbiotic nodule development |
| P | Q9Z3Q3 | CC | Probable K+/H+ antiporter subunit G;                                                                                                                                                                                                              |
| P | Q9Z3Q3 | DE | Probable K+/H+ antiporter subunit G;                                                                                                                                                                                                              |
| P | Q9Z3Q3 | DE | pH adaptation potassium efflux system protein G;                                                                                                                                                                                                  |
| P | Q9Z3R5 | CC | Part of the binding-protein-dependent transport system for alpha-glucosides such as sucrose, maltose and trehalose.                                                                                                                               |
| P | Q9Z3R5 | CC | Part of the binding-protein-dependent transport system for alpha-glucosides such as sucrose, maltose and trehalose.                                                                                                                               |
| P | Q9Z3R6 | CC | Part of the binding-protein-dependent transport system for alpha-glucosides such as sucrose, maltose and trehalose                                                                                                                                |
| P | Q9Z3R6 | CC | Part of the binding-protein-dependent transport system for alpha-glucosides such as sucrose, maltose and trehalose                                                                                                                                |
| P | Q9Z3R7 | CC | Part of the binding-protein-dependent transport system for alpha-glucosides such as sucrose, maltose and trehalose                                                                                                                                |
| P | Q9Z3R7 | CC | Part of the binding-protein-dependent transport system for alpha-glucosides such as sucrose, maltose and trehalose                                                                                                                                |
| P | Q9Z6M8 | CC | The arginine uptake by the bacterium in the macrophage may be a virulence factor against the host innate immune response.                                                                                                                         |
| P | Q9Z6M8 | DE | Arginine/agmatine antiporter;                                                                                                                                                                                                                     |
| P | Q9Z7N9 | DE | Probable hexose phosphate transport protein;                                                                                                                                                                                                      |
| P | Q9Z7U0 | DE | ADP,ATP carrier protein 2;                                                                                                                                                                                                                        |
| P | Q9Z7U0 | DE | ADP/ATP translocase 2;                                                                                                                                                                                                                            |
| P | Q9Z7U0 | DE | ADP/ATP translocase 2;                                                                                                                                                                                                                            |
| P | Q9Z7U0 | DR | ATP:ADP antiporter activity                                                                                                                                                                                                                       |
| P | Q9Z7U0 | DR | ATP:ADP antiporter activity                                                                                                                                                                                                                       |
| P | Q9Z8J2 | DE | ADP,ATP carrier protein 1;                                                                                                                                                                                                                        |
| P | Q9Z8J2 | DE | ADP/ATP translocase 1;                                                                                                                                                                                                                            |
| P | Q9Z8J2 | DE | ADP/ATP translocase 1;                                                                                                                                                                                                                            |
| P | Q9Z8J2 | DR | ATP:ADP antiporter activity                                                                                                                                                                                                                       |
| P | Q9Z8J2 | DR | ATP:ADP antiporter activity                                                                                                                                                                                                                       |
| P | Q9Z8Q8 | CC | Part of the ABC transporter complex MetNIQ involved in methionine import                                                                                                                                                                          |
| P | Q9Z8Q8 | DE | Methionine import ATP-binding protein MetN;                                                                                                                                                                                                       |
| P | Q9ZAA6 | CC | Inner subunit of the primary sodium pump glutaconyl-CoA decarboxylase (GCD)                                                                                                                                                                       |
| P | Q9ZAA7 | CC | Inner subunit of the primary sodium pump glutaconyl-CoA decarboxylase (GCD)                                                                                                                                                                       |
| P | Q9ZAA8 | CC | Makes part of the primary sodium pump glutaconyl-CoA decarboxylase (GCD)                                                                                                                                                                          |

|   |        |    |                                                                                                                                                                                         |
|---|--------|----|-----------------------------------------------------------------------------------------------------------------------------------------------------------------------------------------|
| P | Q9ZAA8 | DR | sodium ion transmembrane transporter activity                                                                                                                                           |
| P | Q9ZCC4 | CC | Part of the ABC transporter complex ZnuABC involved in zinc import                                                                                                                      |
| P | Q9ZCC4 | DE | Zinc import ATP-binding protein ZnuC;                                                                                                                                                   |
| P | Q9ZCC4 | DR | zinc transporting ATPase activity                                                                                                                                                       |
| P | Q9ZCF9 | CC | Part of the ABC transporter complex CcmAB involved in the biogenesis of c-type cytochromes; once thought to export heme, this seems not to be the case, but its exact role is uncertain |
| P | Q9ZCF9 | DE | Heme exporter protein A;                                                                                                                                                                |
| P | Q9ZCF9 | DR | heme-transporting ATPase activity                                                                                                                                                       |
| P | Q9ZD47 | CC | Provides the rickettsial cell with host ATP in exchange for rickettsial ADP                                                                                                             |
| P | Q9ZD47 | CC | Provides the rickettsial cell with host ATP in exchange for rickettsial ADP                                                                                                             |
| P | Q9ZD47 | DE | ADP,ATP carrier protein 4;                                                                                                                                                              |
| P | Q9ZD47 | DE | ADP/ATP translocase 4;                                                                                                                                                                  |
| P | Q9ZD47 | DE | ADP/ATP translocase 4;                                                                                                                                                                  |
| P | Q9ZD47 | DR | ATP:ADP antiporter activity                                                                                                                                                             |
| P | Q9ZD47 | DR | ATP:ADP antiporter activity                                                                                                                                                             |
| P | Q9ZD67 | CC | Provides the rickettsial cell with host ATP in exchange for rickettsial ADP                                                                                                             |
| P | Q9ZD67 | CC | Provides the rickettsial cell with host ATP in exchange for rickettsial ADP                                                                                                             |
| P | Q9ZD67 | DE | ADP,ATP carrier protein 3;                                                                                                                                                              |
| P | Q9ZD67 | DE | ADP/ATP translocase 3;                                                                                                                                                                  |
| P | Q9ZD67 | DE | ADP/ATP translocase 3;                                                                                                                                                                  |
| P | Q9ZD67 | DR | ATP:ADP antiporter activity                                                                                                                                                             |
| P | Q9ZD67 | DR | ATP:ADP antiporter activity                                                                                                                                                             |
| P | Q9ZDF2 | CC | Provides the rickettsial cell with host ATP in exchange for rickettsial ADP                                                                                                             |
| P | Q9ZDF2 | CC | Provides the rickettsial cell with host ATP in exchange for rickettsial ADP                                                                                                             |
| P | Q9ZDF2 | DE | ADP,ATP carrier protein 2;                                                                                                                                                              |
| P | Q9ZDF2 | DE | ADP/ATP translocase 2;                                                                                                                                                                  |
| P | Q9ZDF2 | DE | ADP/ATP translocase 2;                                                                                                                                                                  |
| P | Q9ZDF2 | DR | ATP:ADP antiporter activity                                                                                                                                                             |
| P | Q9ZDF2 | DR | ATP:ADP antiporter activity                                                                                                                                                             |
| P | Q9ZE70 | CC | Transports S-adenosylmethionine.                                                                                                                                                        |
| P | Q9ZE70 | DE | S-adenosylmethionine uptake transporter;                                                                                                                                                |
| P | Q9ZHC9 | CC | Component of the sil cation-efflux system that confers resistance to silver                                                                                                             |
| P | Q9ZNG6 | CC | Does not transport K <sup>+</sup> , Ca <sup>2+</sup> or Mg <sup>2+</sup> .                                                                                                              |
| P | Q9ZNG6 | CC | Mnh complex is a Na <sup>+</sup> Li <sup>+</sup> /H <sup>+</sup> antiporter involved in Na <sup>+</sup> and/or Li <sup>+</sup> excretion                                                |
| P | Q9ZNG6 | CC | Mnh complex is a Na <sup>+</sup> Li <sup>+</sup> /H <sup>+</sup> antiporter involved in Na <sup>+</sup> and/or Li <sup>+</sup> excretion                                                |
| P | Q9ZNG6 | CC | Na <sup>+</sup> /H <sup>+</sup> antiport consumes a transmembrane electrical potential, and is thus inferred to be electrogenic                                                         |
| P | Q9ZNG6 | CC | Na <sup>+</sup> /H <sup>+</sup> antiport consumes a transmembrane electrical potential, and is thus inferred to be electrogenic                                                         |
| P | Q9ZNG6 | DE | Na <sup>+</sup> /H <sup>+</sup> antiporter subunit A1;                                                                                                                                  |
| P | Q9ZNG6 | DE | Na <sup>+</sup> /H <sup>+</sup> antiporter subunit A1;                                                                                                                                  |
| P | Q9ZPR4 | CC | magnesium transporter that may mediate the influx of magnesium (By similarity)                                                                                                          |
| P | Q9ZPR4 | DE | Magnesium Transporter 3;                                                                                                                                                                |
| P | Q9ZPR4 | DE | Magnesium transporter MRS2-5;                                                                                                                                                           |
| P | Q9ZPR4 | DR | magnesium ion transmembrane transporter activity                                                                                                                                        |
| P | Q9ZPR7 | CC | Transports a wide spectrum of oxo derivatives of heterocyclic nitrogen compounds, including allantoin, uric acid and xanthine, but not adenine                                          |
| P | Q9ZPR7 | DR | allantoin uptake transmembrane transporter activity                                                                                                                                     |
| P | Q9ZV07 | CC | Aquaporins facilitate the transport of water and small neutral solutes across cell membranes (By similarity).                                                                           |
| P | Q9ZVK6 | CC | Responsible for the transport of sucrose into the cell, with the concomitant uptake of protons (symport system)                                                                         |
| P | Q9ZVK6 | DE | Sucrose permease 8;                                                                                                                                                                     |
| P | Q9ZVK6 | DE | Sucrose transport protein SUC8;                                                                                                                                                         |
| P | Q9ZVK6 | DE | Sucrose-proton symporter 8;                                                                                                                                                             |
| P | Q9ZVK6 | DR | sucrose transmembrane transporter activity                                                                                                                                              |
| P | Q9ZVX8 | CC | Aquaporins facilitate the transport of water and small neutral solutes across cell membranes (By similarity).                                                                           |
| P | Q9ZWT3 | CC | High-affinity transporter for external inorganic phosphate (By similarity).                                                                                                             |
| P | Q9ZWT3 | DE | Probable inorganic phosphate transporter 1-6;                                                                                                                                           |
| P | Q9ZWT3 | DR | inorganic phosphate transmembrane transporter activity                                                                                                                                  |
| N | A0A322 | CC | F(1)F(0) ATP synthase produces ATP from ADP in the presence of a proton or sodium gradient                                                                                              |

|   |        |    |                                                                                                                                                                                                                  |
|---|--------|----|------------------------------------------------------------------------------------------------------------------------------------------------------------------------------------------------------------------|
| N | A0A322 | CC | During catalysis, ATP synthesis in the catalytic domain of F(1) is coupled via a rotary mechanism of the central stalk subunits to proton translocation (By similarity).                                         |
| N | A0A322 | CC | F-type ATPases consist of two structural domains, F(1) containing the extramembraneous catalytic core and F(0) containing the membrane proton channel, linked together by a central stalk and a peripheral stalk |
| N | A0A322 | DE | ATP synthase F(0) sector subunit c;                                                                                                                                                                              |
| N | A0A322 | DE | ATP synthase subunit c, chloroplastic;                                                                                                                                                                           |
| N | A0A322 | DE | ATPase subunit III;                                                                                                                                                                                              |
| N | A0A322 | DE | F-ATPase subunit c;                                                                                                                                                                                              |
| N | A0A322 | DE | F-type ATPase subunit c;                                                                                                                                                                                         |
| N | A0A322 | DE | Lipid-binding protein;                                                                                                                                                                                           |
| N | A0A322 | DR | ATP hydrolysis coupled proton transport                                                                                                                                                                          |
| N | A0A322 | DR | ATP synthesis coupled proton transport                                                                                                                                                                           |
| N | A0A322 | DR | hydrogen ion transmembrane transporter activity                                                                                                                                                                  |
| N | A0A322 | DR | lipid binding                                                                                                                                                                                                    |
| N | A0AH37 | DE | Pantothenate kinase;                                                                                                                                                                                             |
| N | A0AH37 | DE | Pantothenic acid kinase;                                                                                                                                                                                         |
| N | A0AH37 | DR | coenzyme A biosynthetic process                                                                                                                                                                                  |
| N | A0AH37 | DR | pantothenate kinase activity                                                                                                                                                                                     |
| N | A0AII5 | CC | Catalyzes the 1,3-allylic rearrangement of the homoallylic substrate isopentenyl (IPP) to its allylic isomer, dimethylallyl diphosphate (DMAPP) (By similarity).                                                 |
| N | A0AII5 | DE | IPP isomerase;                                                                                                                                                                                                   |
| N | A0AII5 | DE | Isopentenyl pyrophosphate isomerase;                                                                                                                                                                             |
| N | A0AII5 | DE | Isopentenyl-diphosphate delta-isomerase;                                                                                                                                                                         |
| N | A0AII5 | DR | isopentenyl-diphosphate delta-isomerase activity                                                                                                                                                                 |
| N | A0AII5 | DR | isoprenoid biosynthetic process                                                                                                                                                                                  |
| N | A0AII5 | DR | oxidoreductase activity                                                                                                                                                                                          |
| N | A0AK41 | CC | Major role in the synthesis of nucleoside triphosphates other than ATP                                                                                                                                           |
| N | A0AK41 | CC | The ATP gamma phosphate is transferred to the NDP beta phosphate via a ping-pong mechanism, using a phosphorylated active-site intermediate.                                                                     |
| N | A0AK41 | DE | NDP kinase;                                                                                                                                                                                                      |
| N | A0AK41 | DE | Nucleoside diphosphate kinase;                                                                                                                                                                                   |
| N | A0AK41 | DE | Nucleoside-2-P kinase;                                                                                                                                                                                           |
| N | A0AK41 | DR | CTP biosynthetic process                                                                                                                                                                                         |
| N | A0AK41 | DR | GTP biosynthetic process                                                                                                                                                                                         |
| N | A0AK41 | DR | UTP biosynthetic process                                                                                                                                                                                         |
| N | A0AK41 | DR | metal ion binding                                                                                                                                                                                                |
| N | A0AK41 | DR | nucleoside diphosphate kinase activity                                                                                                                                                                           |
| N | A0AMG5 | DE | 50S ribosomal protein L34;                                                                                                                                                                                       |
| N | A0AMG5 | DR | structural constituent of ribosome                                                                                                                                                                               |
| N | A0JWY6 | CC | Component of the proteasome core, a large protease complex with broad specificity involved in protein degradation (By similarity).                                                                               |
| N | A0JWY6 | DE | 20S proteasome beta subunit;                                                                                                                                                                                     |
| N | A0JWY6 | DE | Proteasome core protein PrcB;                                                                                                                                                                                    |
| N | A0JWY6 | DE | Proteasome subunit beta;                                                                                                                                                                                         |
| N | A0JWY6 | DR | proteasomal protein catabolic process                                                                                                                                                                            |
| N | A0JWY6 | DR | threonine-type endopeptidase activity                                                                                                                                                                            |
| N | A0JWY8 | CC | Catalyzes the covalent attachment of the prokaryotic ubiquitin-like protein modifier Pup to the proteasomal substrate proteins, thereby targeting them for degradation.                                          |
| N | A0JWY8 | CC | The tagging reaction involves the side-chain carboxylate of the C-terminal glutamate of Pup and the side-chain amino group of a substrate lysine (By similarity).                                                |
| N | A0JWY8 | CC | This tagging system is termed pupylation                                                                                                                                                                         |
| N | A0JWY8 | DE | Proteasome accessory factor A;                                                                                                                                                                                   |
| N | A0JWY8 | DE | Pup--protein ligase;                                                                                                                                                                                             |
| N | A0JWY8 | DE | Pup-conjugating enzyme;                                                                                                                                                                                          |
| N | A0JWY8 | DR | acid-amino acid ligase activity                                                                                                                                                                                  |
| N | A0JWY8 | DR | modification-dependent protein catabolic process                                                                                                                                                                 |
| N | A0JWY8 | DR | proteasomal protein catabolic process                                                                                                                                                                            |
| N | A0K487 | CC | Cell wall formation (By similarity).                                                                                                                                                                             |
| N | A0K487 | DE | UDP-N-acetylmuramate--L-alanine ligase;                                                                                                                                                                          |
| N | A0K487 | DE | UDP-N-acetylmuramoyl-L-alanine synthetase;                                                                                                                                                                       |
| N | A0K487 | DR | UDP-N-acetylmuramate-L-alanine ligase activity                                                                                                                                                                   |
| N | A0K487 | DR | cell division                                                                                                                                                                                                    |
| N | A0K487 | DR | cellular cell wall organization                                                                                                                                                                                  |
| N | A0K487 | DR | peptidoglycan biosynthetic process                                                                                                                                                                               |

|   |        |    |                                                                                                                                                     |
|---|--------|----|-----------------------------------------------------------------------------------------------------------------------------------------------------|
| N | A0K487 | DR | regulation of cell shape                                                                                                                            |
| N | A0K6Q0 | CC | Part of an ABC transporter complex involved in carbohydrate import                                                                                  |
| N | A0K6Q0 | CC | Could be involved in ribose, galactose and/or methyl galactoside import                                                                             |
| N | A0K6Q0 | CC | Responsible for energy coupling to the transport system (By similarity).                                                                            |
| N | A0K6Q0 | DE | Putative ribose/galactose/methyl galactoside import ATP-binding protein 1;                                                                          |
| N | A0K6Q0 | DR | monosaccharide-transporting ATPase activity                                                                                                         |
| N | A0K8B3 | CC | Catalyzes the synthesis of GMP from XMP (By similarity).                                                                                            |
| N | A0K8B3 | DE | GMP synthase [glutamine-hydrolyzing];                                                                                                               |
| N | A0K8B3 | DE | GMP synthetase;                                                                                                                                     |
| N | A0K8B3 | DE | Glutamine amidotransferase;                                                                                                                         |
| N | A0K8B3 | DR | GMP biosynthetic process                                                                                                                            |
| N | A0K8B3 | DR | GMP synthase (glutamine-hydrolyzing) activity                                                                                                       |
| N | A0K8B3 | DR | glutamine metabolic process                                                                                                                         |
| N | A0KGJ2 | DE | AICAR transformylase;                                                                                                                               |
| N | A0KGJ2 | DE | Bifunctional purine biosynthesis protein purH;                                                                                                      |
| N | A0KGJ2 | DE | IMP cyclohydrolase;                                                                                                                                 |
| N | A0KGJ2 | DE | IMP synthase;                                                                                                                                       |
| N | A0KGJ2 | DE | Inosinase;                                                                                                                                          |
| N | A0KGJ2 | DE | Phosphoribosylaminoimidazolecarboxamide formyltransferase;                                                                                          |
| N | A0KGJ2 | DR | IMP biosynthetic process                                                                                                                            |
| N | A0KGJ2 | DR | IMP cyclohydrolase activity                                                                                                                         |
| N | A0KGJ2 | DR | phosphoribosylaminoimidazolecarboxamide formyltransferase activity                                                                                  |
| N | A0KR79 | CC | One of the proteins required for the normal export of preproteins out of the cell cytoplasm                                                         |
| N | A0KR79 | CC | It also specifically binds to its receptor secA (By similarity).                                                                                    |
| N | A0KR79 | CC | It is a molecular chaperone that binds to a subset of precursor proteins, maintaining them in a translocation-competent state                       |
| N | A0KR79 | DE | Protein-export protein secB;                                                                                                                        |
| N | A0KR79 | DR | protein tetramerization                                                                                                                             |
| N | A0KR79 | DR | protein transport                                                                                                                                   |
| N | A0KR79 | DR | transmembrane transport                                                                                                                             |
| N | A0KR79 | DR | unfolded protein binding                                                                                                                            |
| N | A0KSQ0 | DE | Thiopurine S-methyltransferase;                                                                                                                     |
| N | A0KSQ0 | DE | Thiopurine methyltransferase;                                                                                                                       |
| N | A0KSQ0 | DR | thiopurine S-methyltransferase activity                                                                                                             |
| N | A0KTX7 | CC | The natural substrate for this enzyme may be peptidyl- tRNAs which drop off the ribosome during protein synthesis (By similarity).                  |
| N | A0KTX7 | DE | Peptidyl-tRNA hydrolase;                                                                                                                            |
| N | A0KTX7 | DR | aminoacyl-tRNA hydrolase activity                                                                                                                   |
| N | A0KWB1 | DE | 1-(5-phosphoribosyl)-5-[(5-phosphoribosylamino)methylideneamino] imidazole-4-carboxamide isomerase;                                                 |
| N | A0KWB1 | DE | Phosphoribosylformimino-5-aminoimidazole carboxamide ribotide isomerase;                                                                            |
| N | A0KWB1 | DR | 1-(5-phosphoribosyl)-5-[(5-phosphoribosylamino)methylideneamino]imidazole-4-carboxamide isomerase activity                                          |
| N | A0KWB1 | DR | histidine biosynthetic process                                                                                                                      |
| N | A0L4K6 | CC | Nucleotidase that shows phosphatase activity on nucleoside 5'-monophosphates (By similarity).                                                       |
| N | A0L4K6 | DE | 5'-nucleotidase surE;                                                                                                                               |
| N | A0L4K6 | DE | Nucleoside 5'-monophosphate phosphohydrolase;                                                                                                       |
| N | A0L4K6 | DR | 5'-nucleotidase activity                                                                                                                            |
| N | A0L4K6 | DR | metal ion binding                                                                                                                                   |
| N | A0L4K6 | DR | nucleotide binding                                                                                                                                  |
| N | A0L6F7 | DE | Lysine--tRNA ligase;                                                                                                                                |
| N | A0L6F7 | DE | Lysyl-tRNA synthetase;                                                                                                                              |
| N | A0L6F7 | DR | lysine-tRNA ligase activity                                                                                                                         |
| N | A0L6F7 | DR | lysyl-tRNA aminoacylation                                                                                                                           |
| N | A0L6F7 | DR | metal ion binding                                                                                                                                   |
| N | A0L6F7 | DR | nucleic acid binding                                                                                                                                |
| N | A0LQZ7 | CC | Converts 4-diphosphocytidyl-2-C-methyl-D-erythritol 2- phosphate into 2-C-methyl-D-erythritol 2,4-cyclodiphosphate (MECDP) and CMP (By similarity). |
| N | A0LQZ7 | DE | 2-C-methyl-D-erythritol 2,4-cyclodiphosphate synthase;                                                                                              |
| N | A0LQZ7 | DE | MECDP-synthase;                                                                                                                                     |
| N | A0LQZ7 | DR | 2-C-methyl-D-erythritol 2,4-cyclodiphosphate synthase activity                                                                                      |
| N | A0LQZ7 | DR | metal ion binding                                                                                                                                   |
| N | A0LQZ7 | DR | terpenoid biosynthetic process                                                                                                                      |

|   |        |    |                                                                                                                                                                                                                                       |
|---|--------|----|---------------------------------------------------------------------------------------------------------------------------------------------------------------------------------------------------------------------------------------|
| N | A0LRK0 | DE | UPF0234 protein Acel_0286;                                                                                                                                                                                                            |
| N | A0LRM3 | CC | One of the primary rRNA binding proteins                                                                                                                                                                                              |
| N | A0LRM3 | CC | it has been suggested to have peptidyltransferase activity; this is somewhat controversial                                                                                                                                            |
| N | A0LRM3 | CC | Makes several contacts with the 16S rRNA in the 70S ribosome (By similarity).                                                                                                                                                         |
| N | A0LRM3 | CC | Required for association of the 30S and 50S subunits to form the 70S ribosome, for tRNA binding and peptide bond formation                                                                                                            |
| N | A0LRM3 | DE | 50S ribosomal protein L2;                                                                                                                                                                                                             |
| N | A0LRM3 | DR | structural constituent of ribosome                                                                                                                                                                                                    |
| N | A0LRM3 | DR | transferase activity                                                                                                                                                                                                                  |
| N | A0M2N6 | CC | Exhibits a very high intrinsic GTPase hydrolysis rate                                                                                                                                                                                 |
| N | A0M2N6 | CC | involved in the addition of a carboxymethylaminomethyl (cmnm) group at the wobble position (U34) of certain tRNAs, forming tRNA-cmnm(5)s(2)U34 (By similarity)                                                                        |
| N | A0M2N6 | DE | tRNA modification GTPase mnmE;                                                                                                                                                                                                        |
| N | A0M2N6 | DR | GTPase activity                                                                                                                                                                                                                       |
| N | A0M2N6 | DR | metal ion binding                                                                                                                                                                                                                     |
| N | A0M2N6 | DR | small GTPase mediated signal transduction                                                                                                                                                                                             |
| N | A0M2N6 | DR | tRNA modification                                                                                                                                                                                                                     |
| N | A0PLC7 | CC | Catalyzes the transfer of acetyl from acetyl-CoA to desacetylmycothiol (Cys-GlcN-Ins) to form mycothiol (By similarity).                                                                                                              |
| N | A0PLC7 | DE | MSH acetyltransferase;                                                                                                                                                                                                                |
| N | A0PLC7 | DE | Mycothiol acetyltransferase;                                                                                                                                                                                                          |
| N | A0PLC7 | DE | Mycothiol synthase;                                                                                                                                                                                                                   |
| N | A0PLC7 | DR | N-acetyltransferase activity                                                                                                                                                                                                          |
| N | A0PRV0 | CC | Exhibits S-adenosyl-L-methionine-dependent methyltransferase activity (By similarity)                                                                                                                                                 |
| N | A0PRV0 | DE | Putative S-adenosyl-L-methionine-dependent methyltransferase MUL_2766;                                                                                                                                                                |
| N | A0PRV0 | DR | methyltransferase activity                                                                                                                                                                                                            |
| N | A0PT76 | CC | Represses a number of genes involved in the response to DNA damage (SOS response), including recA and lexA                                                                                                                            |
| N | A0PT76 | CC | In the presence of single-stranded DNA, recA interacts with lexA causing an autocatalytic cleavage which disrupts the DNA-binding part of lexA, leading to derepression of the SOS regulon and eventually DNA repair (By similarity). |
| N | A0PT76 | DE | LexA repressor;                                                                                                                                                                                                                       |
| N | A0PT76 | DR | DNA replication                                                                                                                                                                                                                       |
| N | A0PT76 | DR | serine-type endopeptidase activity                                                                                                                                                                                                    |
| N | A0PX72 | DE | 50S ribosomal protein L34;                                                                                                                                                                                                            |
| N | A0PX72 | DR | structural constituent of ribosome                                                                                                                                                                                                    |
| N | A0Q0Y3 | DE | 30S ribosomal protein S16;                                                                                                                                                                                                            |
| N | A0Q0Y3 | DR | structural constituent of ribosome                                                                                                                                                                                                    |
| N | A0Q2A0 | CC | Condenses 4-methyl-5-(beta-hydroxyethyl)thiazole monophosphate (THZ-P) and 2-methyl-4-amino-5-hydroxymethyl pyrimidine pyrophosphate (HMP-PP) to form thiamine monophosphate (TMP) (By similarity).                                   |
| N | A0Q2A0 | DE | TMP pyrophosphorylase;                                                                                                                                                                                                                |
| N | A0Q2A0 | DE | Thiamine-phosphate pyrophosphorylase;                                                                                                                                                                                                 |
| N | A0Q2A0 | DE | Thiamine-phosphate synthase;                                                                                                                                                                                                          |
| N | A0Q2A0 | DR | metal ion binding                                                                                                                                                                                                                     |
| N | A0Q2A0 | DR | thiamine biosynthetic process                                                                                                                                                                                                         |
| N | A0Q2A0 | DR | thiamine-phosphate diphosphorylase activity                                                                                                                                                                                           |
| N | A0Q6R7 | CC | Necessary for normal cell division and for the maintenance of normal septation (By similarity).                                                                                                                                       |
| N | A0Q6R7 | DE | Probable GTP-binding protein EngB;                                                                                                                                                                                                    |
| N | A0Q6R7 | DR | barrier septum formation                                                                                                                                                                                                              |
| N | A0Q753 | CC | NAD-binding protein involved in the addition of a carboxymethylaminomethyl (cmnm) group at the wobble position (U34) of certain tRNAs, forming tRNA-cmnm(5)s(2)U34 (By similarity).                                                   |
| N | A0Q753 | DE | Glucose-inhibited division protein A;                                                                                                                                                                                                 |
| N | A0Q753 | DE | tRNA uridine 5-carboxymethylaminomethyl modification enzyme MnmG;                                                                                                                                                                     |
| N | A0Q753 | DR | flavin adenine dinucleotide binding                                                                                                                                                                                                   |
| N | A0Q753 | DR | tRNA wobble uridine modification                                                                                                                                                                                                      |
| N | A0Q8F6 | CC | Catalyzes the decarboxylation of four acetate groups of uroporphyrinogen-III to yield coproporphyrinogen-III (By similarity).                                                                                                         |
| N | A0Q8F6 | DE | Uroporphyrinogen decarboxylase;                                                                                                                                                                                                       |
| N | A0Q8F6 | DR | porphyrin biosynthetic process                                                                                                                                                                                                        |
| N | A0Q8F6 | DR | uroporphyrinogen decarboxylase activity                                                                                                                                                                                               |
| N | A0QJ11 | DE | O-phosphoserine phosphohydrolase;                                                                                                                                                                                                     |
| N | A0QJ11 | DE | Phosphoserine phosphatase;                                                                                                                                                                                                            |

|   |        |    |                                                                                                                                                                                                                                 |
|---|--------|----|---------------------------------------------------------------------------------------------------------------------------------------------------------------------------------------------------------------------------------|
| N | A0QJ1  | DR | L-serine biosynthetic process                                                                                                                                                                                                   |
| N | A0QJ1  | DR | amino acid binding                                                                                                                                                                                                              |
| N | A0QJ1  | DR | metal ion binding                                                                                                                                                                                                               |
| N | A0QJ1  | DR | phosphoserine phosphatase activity                                                                                                                                                                                              |
| N | A0QL54 | DE | 50S ribosomal protein L10;                                                                                                                                                                                                      |
| N | A0QL54 | DR | ribosome biogenesis                                                                                                                                                                                                             |
| N | A0QL54 | DR | structural constituent of ribosome                                                                                                                                                                                              |
| N | A0QU58 | CC | Peptide chain release factor 2 directs the termination of translation in response to the peptide chain termination codons UGA and UAA (By similarity).                                                                          |
| N | A0QU58 | DE | Peptide chain release factor 2;                                                                                                                                                                                                 |
| N | A0QU58 | DR | translation release factor activity, codon specific                                                                                                                                                                             |
| N | A0R9A0 | CC | Catalyzes the attachment of proline to tRNA(Pro) in a two-step reaction: proline is first activated by ATP to form Pro- AMP and then transferred to the acceptor end of tRNA(Pro) (By similarity).                              |
| N | A0R9A0 | DE | Proline--tRNA ligase 2;                                                                                                                                                                                                         |
| N | A0R9A0 | DE | Prolyl-tRNA synthetase 2;                                                                                                                                                                                                       |
| N | A0R9A0 | DR | proline-tRNA ligase activity                                                                                                                                                                                                    |
| N | A0R9A0 | DR | prolyl-tRNA aminoacylation                                                                                                                                                                                                      |
| N | A0RA13 | CC | One of the components of the high-affinity ATP-driven potassium transport (or KDP) system, which catalyzes the hydrolysis of ATP coupled with the exchange of hydrogen and potassium ions (By similarity).                      |
| N | A0RA13 | DE | ATP phosphohydrolase [potassium-transporting] B chain;                                                                                                                                                                          |
| N | A0RA13 | DE | Potassium-binding and translocating subunit B;                                                                                                                                                                                  |
| N | A0RA13 | DE | Potassium-translocating ATPase B chain;                                                                                                                                                                                         |
| N | A0RA13 | DE | Potassium-transporting ATPase B chain;                                                                                                                                                                                          |
| N | A0RA13 | DR | ATP biosynthetic process                                                                                                                                                                                                        |
| N | A0RA13 | DR | magnesium ion binding                                                                                                                                                                                                           |
| N | A0RA13 | DR | potassium-transporting ATPase activity                                                                                                                                                                                          |
| N | A0RQD0 | CC | Involved in mRNA degradation                                                                                                                                                                                                    |
| N | A0RQD0 | CC | Hydrolyzes single-stranded polyribonucleotides processively in the 3'- to 5'- direction (By similarity).                                                                                                                        |
| N | A0RQD0 | DE | Polynucleotide phosphorylase;                                                                                                                                                                                                   |
| N | A0RQD0 | DE | Polyribonucleotide nucleotidyltransferase;                                                                                                                                                                                      |
| N | A0RQD0 | DR | 3'-5'-exoribonuclease activity                                                                                                                                                                                                  |
| N | A0RQD0 | DR | RNA processing                                                                                                                                                                                                                  |
| N | A0RQD0 | DR | mRNA catabolic process                                                                                                                                                                                                          |
| N | A0RQD0 | DR | polyribonucleotide nucleotidyltransferase activity                                                                                                                                                                              |
| N | A0RQJ3 | CC | This protein promotes the GTP-dependent binding of aminoacyl-tRNA to the A-site of ribosomes during protein biosynthesis.                                                                                                       |
| N | A0RQJ3 | DE | Elongation factor Tu;                                                                                                                                                                                                           |
| N | A0RQJ3 | DR | GTPase activity                                                                                                                                                                                                                 |
| N | A0RQJ3 | DR | translation elongation factor activity                                                                                                                                                                                          |
| N | A0RQU7 | CC | Associates with the EF-Tu.GDP complex and induces the exchange of GDP to GTP                                                                                                                                                    |
| N | A0RQU7 | CC | It remains bound to the aminoacyl-tRNA.EF- Tu.GTP complex up to the GTP hydrolysis stage on the ribosome.                                                                                                                       |
| N | A0RQU7 | DE | Elongation factor Ts;                                                                                                                                                                                                           |
| N | A0RQU7 | DR | translation elongation factor activity                                                                                                                                                                                          |
| N | A0RY02 | CC | One of the primary rRNA binding proteins, it binds directly to 16S rRNA where it nucleates assembly of the body of the 30S subunit (By similarity).                                                                             |
| N | A0RY02 | DE | 30S ribosomal protein S4P;                                                                                                                                                                                                      |
| N | A0RY02 | DR | structural constituent of ribosome                                                                                                                                                                                              |
| N | A1A8P2 | CC | Catalyzes the formation of 2-(5"-triphosphoribosyl)-3'- dephosphocoenzyme-A, the precursor of the prosthetic group of the holo-acyl carrier protein (gamma chain) of citrate lyase, from ATP and dephospho-CoA (By similarity). |
| N | A1A8P2 | DE | 2-(5"-triphosphoribosyl)-3'-dephospho-CoA synthase;                                                                                                                                                                             |
| N | A1A8P2 | DE | 2-(5"-triphosphoribosyl)-3'-dephosphocoenzyme-A synthase;                                                                                                                                                                       |
| N | A1A8P2 | DR | phosphorylation                                                                                                                                                                                                                 |
| N | A1A8P2 | DR | triphosphoribosyl-dephospho-CoA synthase activity                                                                                                                                                                               |
| N | A1A9L2 | CC | Catalyzes the desulfonation of aliphatic sulfonates (By similarity).                                                                                                                                                            |
| N | A1A9L2 | DE | Alkanesulfonate monooxygenase;                                                                                                                                                                                                  |
| N | A1A9L2 | DE | FMNH2-dependent aliphatic sulfonate monooxygenase;                                                                                                                                                                              |
| N | A1A9L2 | DR | alkanesulfonate monooxygenase activity                                                                                                                                                                                          |
| N | A1A9L2 | DR | oxidation-reduction process                                                                                                                                                                                                     |
| N | A1AGY4 | CC | sn-glycerol-3-phosphate and glycerophosphoryl diester- binding protein interacts with the binding protein-dependent transport system ugpACE (By similarity).                                                                    |



|   |        |    |                                                                                                                                                                                                                  |
|---|--------|----|------------------------------------------------------------------------------------------------------------------------------------------------------------------------------------------------------------------|
| N | A1AGY4 | DE | sn-glycerol-3-phosphate-binding periplasmic protein ugpB;                                                                                                                                                        |
| N | A1AGY4 | DR | transporter activity                                                                                                                                                                                             |
| N | A1AHK5 | DE | Adenine aminase;                                                                                                                                                                                                 |
| N | A1AHK5 | DE | Adenine deaminase;                                                                                                                                                                                               |
| N | A1AHK5 | DR | adenine catabolic process                                                                                                                                                                                        |
| N | A1AHK5 | DR | adenine deaminase activity                                                                                                                                                                                       |
| N | A1AIE7 | CC | Catalyzes the formation of 5-methyl-uridine at position 54 (M-5-U54) in all tRNAs (By similarity).                                                                                                               |
| N | A1AIE7 | DE | tRNA (uracil-5-)-methyltransferase;                                                                                                                                                                              |
| N | A1AIE7 | DE | tRNA(M-5-U54)-methyltransferase;                                                                                                                                                                                 |
| N | A1AIE7 | DR | tRNA (uracil-5-)-methyltransferase activity                                                                                                                                                                      |
| N | A1AW36 | CC | Catalyzes the isomerization between 2-isopropylmalate and 3-isopropylmalate, via the formation of 2-isopropylmaleate.                                                                                            |
| N | A1AW36 | DE | 3-isopropylmalate dehydratase large subunit;                                                                                                                                                                     |
| N | A1AW36 | DE | Alpha-IPM isomerase;                                                                                                                                                                                             |
| N | A1AW36 | DE | Isopropylmalate isomerase;                                                                                                                                                                                       |
| N | A1AW36 | DR | 3-isopropylmalate dehydratase activity                                                                                                                                                                           |
| N | A1AW36 | DR | 4 iron, 4 sulfur cluster binding                                                                                                                                                                                 |
| N | A1AW36 | DR | leucine biosynthetic process                                                                                                                                                                                     |
| N | A1AW36 | DR | metal ion binding                                                                                                                                                                                                |
| N | A1AWI6 | DE | UPF0250 protein Rmag_0541;                                                                                                                                                                                       |
| N | A1AX52 | DE | Argininosuccinate lyase;                                                                                                                                                                                         |
| N | A1AX52 | DE | Arginosuccinase;                                                                                                                                                                                                 |
| N | A1AX52 | DR | arginine biosynthetic process via ornithine                                                                                                                                                                      |
| N | A1AX52 | DR | argininosuccinate lyase activity                                                                                                                                                                                 |
| N | A1B036 | CC | One of the primary rRNA binding proteins, it binds specifically to the 5'-end of 16S ribosomal RNA (By similarity).                                                                                              |
| N | A1B036 | DE | 30S ribosomal protein S17;                                                                                                                                                                                       |
| N | A1B036 | DR | structural constituent of ribosome                                                                                                                                                                               |
| N | A1BD21 | DE | 50S ribosomal protein L10;                                                                                                                                                                                       |
| N | A1BD21 | DR | ribosome biogenesis                                                                                                                                                                                              |
| N | A1BD21 | DR | structural constituent of ribosome                                                                                                                                                                               |
| N | A1BHN8 | DE | 50S ribosomal protein L27;                                                                                                                                                                                       |
| N | A1BHN8 | DR | structural constituent of ribosome                                                                                                                                                                               |
| N | A1BI66 | DE | UPF0235 protein Cpha266_2081;                                                                                                                                                                                    |
| N | A1BJ29 | CC | This protein binds specifically to 23S rRNA; its binding is stimulated by other ribosomal proteins, e.g., L4, L17, and L20                                                                                       |
| N | A1BJ29 | CC | It is important during the early stages of 50S assembly                                                                                                                                                          |
| N | A1BJ29 | CC | It makes multiple contacts with different domains of the 23S rRNA in the assembled 50S subunit and ribosome (By similarity).                                                                                     |
| N | A1BJ29 | DE | 50S ribosomal protein L22;                                                                                                                                                                                       |
| N | A1BJ29 | DR | structural constituent of ribosome                                                                                                                                                                               |
| N | A1BJ36 | CC | This protein promotes the GTP-dependent binding of aminoacyl-tRNA to the A-site of ribosomes during protein biosynthesis.                                                                                        |
| N | A1BJ36 | DE | Elongation factor Tu;                                                                                                                                                                                            |
| N | A1BJ36 | DR | GTPase activity                                                                                                                                                                                                  |
| N | A1BJ36 | DR | translation elongation factor activity                                                                                                                                                                           |
| N | A1BJW3 | CC | F(1)F(0) ATP synthase produces ATP from ADP in the presence of a proton or sodium gradient                                                                                                                       |
| N | A1BJW3 | CC | During catalysis, ATP synthesis in the catalytic domain of F(1) is coupled via a rotary mechanism of the central stalk subunits to proton translocation (By similarity)                                          |
| N | A1BJW3 | CC | F-type ATPases consist of two structural domains, F(1) containing the extramembraneous catalytic core and F(0) containing the membrane proton channel, linked together by a central stalk and a peripheral stalk |
| N | A1BJW3 | DE | ATP synthase F(1) sector subunit delta;                                                                                                                                                                          |
| N | A1BJW3 | DE | ATP synthase subunit delta;                                                                                                                                                                                      |
| N | A1BJW3 | DE | F-ATPase subunit delta;                                                                                                                                                                                          |
| N | A1BJW3 | DE | F-type ATPase subunit delta;                                                                                                                                                                                     |
| N | A1BJW3 | DR | ATP synthesis coupled proton transport                                                                                                                                                                           |
| N | A1BJW3 | DR | hydrogen ion transporting ATP synthase activity, rotational mechanism                                                                                                                                            |
| N | A1BJY3 | CC | Catalyzes the addition of meso-diaminopimelic acid to the nucleotide precursor UDP-N-acetylmuramoyl-L-alanyl-D-glutamate (UMAG) in the biosynthesis of bacterial cell-wall peptidoglycan (By similarity).        |
| N | A1BJY3 | DE | Meso-A2pm-adding enzyme;                                                                                                                                                                                         |
| N | A1BJY3 | DE | Meso-diaminopimelate-adding enzyme;                                                                                                                                                                              |

|   |        |    |                                                                                                                                                                                                                                            |
|---|--------|----|--------------------------------------------------------------------------------------------------------------------------------------------------------------------------------------------------------------------------------------------|
| N | A1BJY3 | DE | UDP-MurNAc-L-Ala-D-Glu:meso-diaminopimelate ligase;                                                                                                                                                                                        |
| N | A1BJY3 | DE | UDP-MurNAc-tripeptide synthetase;                                                                                                                                                                                                          |
| N | A1BJY3 | DE | UDP-N-acetylmuramoyl-L-alanyl-D-glutamate--2,6-diaminopimelate ligase;                                                                                                                                                                     |
| N | A1BJY3 | DE | UDP-N-acetylmuramyl-tripeptide synthetase;                                                                                                                                                                                                 |
| N | A1BJY3 | DR | UDP-N-acetylmuramoylalanyl-D-glutamate-2,6-diaminopimelate ligase activity                                                                                                                                                                 |
| N | A1BJY3 | DR | cell division                                                                                                                                                                                                                              |
| N | A1BJY3 | DR | cellular cell wall organization                                                                                                                                                                                                            |
| N | A1BJY3 | DR | peptidoglycan biosynthetic process                                                                                                                                                                                                         |
| N | A1BJY3 | DR | regulation of cell shape                                                                                                                                                                                                                   |
| N | A1C8U0 | CC | Endo-1,4-mannanase, a crucial enzyme for depolymerization of seed galactomannans and wood galactoglucomannans (By similarity).                                                                                                             |
| N | A1C8U0 | DE | Endo-beta-1,4-mannanase F;                                                                                                                                                                                                                 |
| N | A1C8U0 | DE | Mannan endo-1,4-beta-mannosidase F;                                                                                                                                                                                                        |
| N | A1C8U0 | DR | carbohydrate metabolic process                                                                                                                                                                                                             |
| N | A1C8U0 | DR | cation binding                                                                                                                                                                                                                             |
| N | A1C8U0 | DR | cellulose binding                                                                                                                                                                                                                          |
| N | A1C8U0 | DR | mannan endo-1,4-beta-mannosidase activity                                                                                                                                                                                                  |
| N | A1CCU0 | CC | Endo-1,4-beta-xylanase involved in the hydrolysis of xylan, a major structural heterogeneous polysaccharide found in plant biomass representing the second most abundant polysaccharide in the biosphere, after cellulose (By similarity). |
| N | A1CCU0 | DE | 1,4-beta-D-xylan xylanohydrolase A;                                                                                                                                                                                                        |
| N | A1CCU0 | DE | Probable endo-1,4-beta-xylanase A;                                                                                                                                                                                                         |
| N | A1CCU0 | DE | Xylanase A;                                                                                                                                                                                                                                |
| N | A1CCU0 | DR | endo-1,4-beta-xylanase activity                                                                                                                                                                                                            |
| N | A1CCU0 | DR | xylan catabolic process                                                                                                                                                                                                                    |
| N | A1CF18 | CC | Positively regulates the activity of the minus-end directed microtubule motor protein dynein                                                                                                                                               |
| N | A1CF18 | CC | May enhances dynein- mediated microtubule sliding by targeting dynein to the microtubule plus end                                                                                                                                          |
| N | A1CF18 | CC | Recruits additional proteins to the dynein complex at SPBs (By similarity).                                                                                                                                                                |
| N | A1CF18 | CC | Required for localization of dynein to the mitotic spindle poles                                                                                                                                                                           |
| N | A1CF18 | CC | Required for nuclear migration during vegetative growth as well as development                                                                                                                                                             |
| N | A1CF18 | CC | Required for retrograde early endosome (EE) transport from the hyphal tip                                                                                                                                                                  |
| N | A1CF18 | DE | Lissencephaly-1 homolog 2;                                                                                                                                                                                                                 |
| N | A1CF18 | DE | Nuclear distribution protein nudF 2;                                                                                                                                                                                                       |
| N | A1CF18 | DR | cell division                                                                                                                                                                                                                              |
| N | A1CYR9 | CC | Polynucleotide 5'-kinase involved in rRNA processing (By similarity).                                                                                                                                                                      |
| N | A1CYR9 | DE | Polynucleotide 5'-hydroxyl-kinase grc3;                                                                                                                                                                                                    |
| N | A1CYR9 | DR | polynucleotide 5'-hydroxyl-kinase activity                                                                                                                                                                                                 |
| N | A1CYR9 | DR | rRNA processing                                                                                                                                                                                                                            |
| N | A1DZY4 | CC | Regulator of rDNA transcription (By similarity).                                                                                                                                                                                           |
| N | A1DZY4 | DE | Ras-like protein family member 11A-like;                                                                                                                                                                                                   |
| N | A1DZY4 | DR | GTPase activity                                                                                                                                                                                                                            |
| N | A1DZY4 | DR | positive regulation of transcription from RNA polymerase I promoter                                                                                                                                                                        |
| N | A1DZY4 | DR | small GTPase mediated signal transduction                                                                                                                                                                                                  |
| N | A1E295 | CC | Thiol protease which is believed to participate in intracellular degradation and turnover of proteins                                                                                                                                      |
| N | A1E295 | CC | Has also been implicated in tumor invasion and metastasis (By similarity).                                                                                                                                                                 |
| N | A1E295 | DE | Cathepsin B heavy chain;                                                                                                                                                                                                                   |
| N | A1E295 | DE | Cathepsin B light chain;                                                                                                                                                                                                                   |
| N | A1E295 | DE | Cathepsin B;                                                                                                                                                                                                                               |
| N | A1E295 | DR | cysteine-type endopeptidase activity                                                                                                                                                                                                       |
| N | A1E295 | DR | regulation of catalytic activity                                                                                                                                                                                                           |
| N | A1E9L2 | DE | 30S ribosomal protein S18, chloroplastic;                                                                                                                                                                                                  |
| N | A1E9L2 | DR | structural constituent of ribosome                                                                                                                                                                                                         |
| N | A1E9U6 | DE | 30S ribosomal protein S18, chloroplastic;                                                                                                                                                                                                  |
| N | A1E9U6 | DR | structural constituent of ribosome                                                                                                                                                                                                         |
| N | A1EA12 | CC | NDH shuttles electrons from NAD(P)H:plastoquinone, via FMN and iron-sulfur (Fe-S) centers, to quinones in the photosynthetic chain and possibly in a chloroplast respiratory chain                                                         |
| N | A1EA12 | CC | Couples the redox reaction to proton translocation, and thus conserves the redox energy in a proton gradient (By similarity).                                                                                                              |
| N | A1EA12 | CC | The immediate electron acceptor for the enzyme in this species is believed to be plastoquinone                                                                                                                                             |
| N | A1EA12 | DE | NAD(P)H dehydrogenase subunit K;                                                                                                                                                                                                           |

|   |        |    |                                                                                                                                       |
|---|--------|----|---------------------------------------------------------------------------------------------------------------------------------------|
| N | A1EA12 | DE | NAD(P)H-quinone oxidoreductase subunit K, chloroplastic;                                                                              |
| N | A1EA12 | DE | NADH-plastoquinone oxidoreductase subunit K;                                                                                          |
| N | A1EA12 | DR | 4 iron, 4 sulfur cluster binding                                                                                                      |
| N | A1EA12 | DR | NADH dehydrogenase (ubiquinone) activity                                                                                              |
| N | A1EA12 | DR | metal ion binding                                                                                                                     |
| N | A1EA12 | DR | oxidation-reduction process                                                                                                           |
| N | A1EA12 | DR | quinone binding                                                                                                                       |
| N | A1IGU4 | CC | May act as a guanine nucleotide exchange factor (GEF) (By similarity).                                                                |
| N | A1IGU4 | DE | Rho guanine nucleotide exchange factor 37;                                                                                            |
| N | A1IGU4 | DR | Rho guanyl-nucleotide exchange factor activity                                                                                        |
| N | A1IGU4 | DR | regulation of Rho protein signal transduction                                                                                         |
| N | A1JIQ8 | CC | 3'-to-5' exoribonuclease specific for small oligoribonucleotides (By similarity).                                                     |
| N | A1JIQ8 | DE | Oligoribonuclease;                                                                                                                    |
| N | A1JIQ8 | DR | exonuclease activity                                                                                                                  |
| N | A1JIQ8 | DR | nucleic acid binding                                                                                                                  |
| N | A1JJD0 | CC | Transaldolase is important for the balance of metabolites in the pentose-phosphate pathway (By similarity).                           |
| N | A1JJD0 | DE | Transaldolase;                                                                                                                        |
| N | A1JJD0 | DR | pentose-phosphate shunt                                                                                                               |
| N | A1JJD0 | DR | sedoheptulose-7-phosphate-D-glycerate 7-phosphate glycerone transferase activity                                                      |
| N | A1JKD8 | DE | Urea amidohydrolase subunit beta;                                                                                                     |
| N | A1JKD8 | DE | Urease subunit beta;                                                                                                                  |
| N | A1JKD8 | DR | nickel ion binding                                                                                                                    |
| N | A1JKD8 | DR | nitrogen compound metabolic process                                                                                                   |
| N | A1JKD8 | DR | urease activity                                                                                                                       |
| N | A1JKS2 | CC | Converts 2C-methyl-D-erythritol 2,4-cyclodiphosphate (ME-2,4cPP) into 1-hydroxy-2-methyl-2-(E)-butenyl 4-diphosphate (By similarity). |
| N | A1JKS2 | DE | 1-hydroxy-2-methyl-2-(E)-butenyl 4-diphosphate synthase;                                                                              |
| N | A1JKS2 | DE | 4-hydroxy-3-methylbut-2-en-1-yl diphosphate synthase;                                                                                 |
| N | A1JKS2 | DR | 4 iron, 4 sulfur cluster binding                                                                                                      |
| N | A1JKS2 | DR | 4-hydroxy-3-methylbut-2-en-1-yl diphosphate synthase activity                                                                         |
| N | A1JKS2 | DR | iron ion binding                                                                                                                      |
| N | A1JKS2 | DR | oxidation-reduction process                                                                                                           |
| N | A1JKS2 | DR | terpenoid biosynthetic process                                                                                                        |
| N | A1JRU3 | CC | Synthesis of 3-octaprenyl-4-hydroxybenzoate (By similarity).                                                                          |
| N | A1JRU3 | DE | 4-HB polyprenyltransferase;                                                                                                           |
| N | A1JRU3 | DE | 4-hydroxybenzoate octaprenyltransferase;                                                                                              |
| N | A1JRU3 | DR | prenyltransferase activity                                                                                                            |
| N | A1JRU3 | DR | ubiquinone biosynthetic process                                                                                                       |
| N | A1JT62 | CC | Catalyzes the NADPH-dependent reduction of glyoxylate and hydroxypyruvate into glycolate and glycerate, respectively (By similarity). |
| N | A1JT62 | DE | Glyoxylate/hydroxypyruvate reductase B;                                                                                               |
| N | A1JT62 | DR | glyoxylate reductase (NADP) activity                                                                                                  |
| N | A1JT62 | DR | hydroxypyruvate reductase activity                                                                                                    |
| N | A1JT62 | DR | oxidation-reduction process                                                                                                           |
| N | A1K1B4 | CC | Plays an important role in the initiation and regulation of chromosomal replication                                                   |
| N | A1K1B4 | CC | Binds to the origin of replication; it binds specifically double-stranded DNA at a 9 bp consensus (dnaA box): 5'-TTATC[CA]A[CA]A-3'   |
| N | A1K1B4 | CC | DnaA binds to ATP and to acidic phospholipids (By similarity).                                                                        |
| N | A1K1B4 | DE | Chromosomal replication initiator protein DnaA;                                                                                       |
| N | A1K1B4 | DR | DNA replication origin binding                                                                                                        |
| N | A1K1B4 | DR | DNA-dependent DNA replication initiation                                                                                              |
| N | A1K1B4 | DR | nucleoside-triphosphatase activity                                                                                                    |
| N | A1K1B4 | DR | regulation of DNA replication                                                                                                         |
| N | A1K6Y5 | CC | Catalyzes the conversion of acetaldehyde to acetyl-CoA, using NAD(+) and coenzyme A                                                   |
| N | A1K6Y5 | CC | Is the final enzyme in the meta- cleavage pathway for the degradation of aromatic compounds (By similarity).                          |
| N | A1K6Y5 | DE | Acetaldehyde dehydrogenase 2/3;                                                                                                       |
| N | A1K6Y5 | DE | Acetaldehyde dehydrogenase [acetylating] 2/3;                                                                                         |
| N | A1K6Y5 | DR | acetaldehyde dehydrogenase (acetylating) activity                                                                                     |
| N | A1K6Y5 | DR | aromatic compound catabolic process                                                                                                   |
| N | A1K6Y5 | DR | cellular amino acid metabolic process                                                                                                 |
| N | A1K6Y5 | DR | oxidation-reduction process                                                                                                           |

|   |        |    |                                                                                                                                                                                                               |
|---|--------|----|---------------------------------------------------------------------------------------------------------------------------------------------------------------------------------------------------------------|
| N | A1KFN9 | CC | Catalyzes the rearrangement of 1-deoxy-D-xylulose 5- phosphate (DXP) to produce the thiazole phosphate moiety of thiamine                                                                                     |
| N | A1KFN9 | CC | In vitro, sulfur can be provided by H(2)S (By similarity).                                                                                                                                                    |
| N | A1KFN9 | CC | Sulfur is provided by the thiocarboxylate moiety of the carrier protein ThiS                                                                                                                                  |
| N | A1KFN9 | DE | Thiazole synthase;                                                                                                                                                                                            |
| N | A1KFN9 | DR | lyase activity                                                                                                                                                                                                |
| N | A1KFN9 | DR | thiamine biosynthetic process                                                                                                                                                                                 |
| N | A1KKQ5 | CC | Presumably involved in the processing and regular turnover of intracellular proteins                                                                                                                          |
| N | A1KKQ5 | CC | Catalyzes the removal of unsubstituted N-terminal amino acids from various peptides (By similarity).                                                                                                          |
| N | A1KKQ5 | DE | Leucine aminopeptidase;                                                                                                                                                                                       |
| N | A1KKQ5 | DE | Leucyl aminopeptidase;                                                                                                                                                                                        |
| N | A1KKQ5 | DE | Probable cytosol aminopeptidase;                                                                                                                                                                              |
| N | A1KKQ5 | DR | aminopeptidase activity                                                                                                                                                                                       |
| N | A1KKQ5 | DR | manganese ion binding                                                                                                                                                                                         |
| N | A1KKQ5 | DR | metalloexopeptidase activity                                                                                                                                                                                  |
| N | A1KMN3 | CC | Associates with the EF-Tu.GDP complex and induces the exchange of GDP to GTP                                                                                                                                  |
| N | A1KMN3 | CC | It remains bound to the aminoacyl-tRNA.EF- Tu.GTP complex up to the GTP hydrolysis stage on the ribosome.                                                                                                     |
| N | A1KMN3 | DE | Elongation factor Ts;                                                                                                                                                                                         |
| N | A1KMN3 | DR | translation elongation factor activity                                                                                                                                                                        |
| N | A1KNZ9 | CC | Structural subunit of pili, which are thin, flexible, coiled-coil, aggregative fibers                                                                                                                         |
| N | A1KNZ9 | CC | Mediates adhesion to the extracellular matrix, an event that would facilitate direct interaction with the host epithelium during infection in the lung or other tissues (By similarity).                      |
| N | A1KNZ9 | DE | Pili structural subunit;                                                                                                                                                                                      |
| N | A1KNZ9 | DR | cell adhesion                                                                                                                                                                                                 |
| N | A1KPD0 | CC | This protein is one of the early assembly proteins of the 50S ribosomal subunit, although it is not seen to bind rRNA by itself                                                                               |
| N | A1KPD0 | CC | It is important during the early stages of 50S assembly (By similarity).                                                                                                                                      |
| N | A1KPD0 | DE | 50S ribosomal protein L13;                                                                                                                                                                                    |
| N | A1KPD0 | DR | structural constituent of ribosome                                                                                                                                                                            |
| N | A1KS98 | CC | Catalyzes the formation of S-adenosylmethionine from methionine and ATP                                                                                                                                       |
| N | A1KS98 | CC | The overall synthetic reaction is composed of two sequential steps, AdoMet formation and the subsequent triphosphate hydrolysis which occurs prior to release of AdoMet from the enzyme (By similarity).      |
| N | A1KS98 | DE | AdoMet synthase;                                                                                                                                                                                              |
| N | A1KS98 | DE | Methionine adenosyltransferase;                                                                                                                                                                               |
| N | A1KS98 | DE | S-adenosylmethionine synthase;                                                                                                                                                                                |
| N | A1KS98 | DR | metal ion binding                                                                                                                                                                                             |
| N | A1KS98 | DR | methionine adenosyltransferase activity                                                                                                                                                                       |
| N | A1KS98 | DR | one-carbon metabolic process                                                                                                                                                                                  |
| N | A1KST1 | CC | Phosphorylation of dTMP to form dTDP in both de novo and salvage pathways of dTTP synthesis (By similarity).                                                                                                  |
| N | A1KST1 | DE | Thymidylate kinase;                                                                                                                                                                                           |
| N | A1KST1 | DE | dTMP kinase;                                                                                                                                                                                                  |
| N | A1KST1 | DR | dTDP biosynthetic process                                                                                                                                                                                     |
| N | A1KST1 | DR | thymidylate kinase activity                                                                                                                                                                                   |
| N | A1KT74 | CC | Catalyzes the decarboxylation of orotidine 5'- monophosphate (OMP) to uridine 5'-monophosphate (UMP) (By similarity).                                                                                         |
| N | A1KT74 | DE | OMP decarboxylase;                                                                                                                                                                                            |
| N | A1KT74 | DE | Orotidine 5'-phosphate decarboxylase;                                                                                                                                                                         |
| N | A1KT74 | DR | 'de novo' UMP biosynthetic process                                                                                                                                                                            |
| N | A1KT74 | DR | 'de novo' pyrimidine base biosynthetic process                                                                                                                                                                |
| N | A1KT74 | DR | orotidine-5'-phosphate decarboxylase activity                                                                                                                                                                 |
| N | A1KU16 | CC | Modifies, by uridylation or deuridylation the PII (glnB) regulatory protein (By similarity).                                                                                                                  |
| N | A1KU16 | DE | PII uridylyl-transferase;                                                                                                                                                                                     |
| N | A1KU16 | DE | Uridylyl-removing enzyme;                                                                                                                                                                                     |
| N | A1KU16 | DE | [Protein-PII] uridylyltransferase;                                                                                                                                                                            |
| N | A1KU16 | DR | [protein-PII] uridylyltransferase activity                                                                                                                                                                    |
| N | A1KU16 | DR | nitrogen compound metabolic process                                                                                                                                                                           |
| N | A1KU52 | CC | The ruvA-ruvB complex in the presence of ATP renatures cruciform structure in supercoiled DNA with palindromic sequence, indicating that it may promote strand exchange reactions in homologous recombination |

|   |        |    |                                                                                                                                                                                                                                               |
|---|--------|----|-----------------------------------------------------------------------------------------------------------------------------------------------------------------------------------------------------------------------------------------------|
| N | A1KU52 | CC | RuvAB is an helicase that mediates the Holliday junction migration by localized denaturation and reannealing (By similarity).                                                                                                                 |
| N | A1KU52 | DE | Holliday junction ATP-dependent DNA helicase ruvB;                                                                                                                                                                                            |
| N | A1KU52 | DR | DNA recombination                                                                                                                                                                                                                             |
| N | A1KU52 | DR | four-way junction helicase activity                                                                                                                                                                                                           |
| N | A1KW12 | CC | PRODUCES ATP FROM ADP IN THE PRESENCE OF A PROTON GRADIENT ACROSS THE MEMBRANE                                                                                                                                                                |
| N | A1KW12 | CC | The gamma chain is believed to be important in regulating ATPase activity and the flow of protons through the CF(0) complex (By similarity).                                                                                                  |
| N | A1KW12 | DE | ATP synthase F1 sector gamma subunit;                                                                                                                                                                                                         |
| N | A1KW12 | DE | ATP synthase gamma chain;                                                                                                                                                                                                                     |
| N | A1KW12 | DE | F-ATPase gamma subunit;                                                                                                                                                                                                                       |
| N | A1KW12 | DR | ATP synthesis coupled proton transport                                                                                                                                                                                                        |
| N | A1KW12 | DR | hydrogen ion transporting ATP synthase activity, rotational mechanism                                                                                                                                                                         |
| N | A1KW12 | DR | proton-transporting ATPase activity, rotational mechanism                                                                                                                                                                                     |
| N | A1LIN5 | CC | Transcription factor, probably binds to the inverted palindrome 5'-GTTAATNATTAAC-3' (By similarity)                                                                                                                                           |
| N | A1LIN5 | CC | Required for induction of rhombomere r5/r6 gene expression in the hindbrain.                                                                                                                                                                  |
| N | A1LIN5 | DE | HNF-1-beta-A;                                                                                                                                                                                                                                 |
| N | A1LIN5 | DE | Hepatocyte nuclear factor 1-beta-2;                                                                                                                                                                                                           |
| N | A1LIN5 | DE | Hepatocyte nuclear factor 1-beta-A;                                                                                                                                                                                                           |
| N | A1LIN5 | DE | Transcription factor 2;                                                                                                                                                                                                                       |
| N | A1LIN5 | DE | Variant hepatic nuclear factor 1;                                                                                                                                                                                                             |
| N | A1LIN5 | DR | anterior/posterior pattern formation                                                                                                                                                                                                          |
| N | A1LIN5 | DR | digestive tract morphogenesis                                                                                                                                                                                                                 |
| N | A1LIN5 | DR | embryonic digestive tract development                                                                                                                                                                                                         |
| N | A1LIN5 | DR | endoderm formation                                                                                                                                                                                                                            |
| N | A1LIN5 | DR | hindbrain morphogenesis                                                                                                                                                                                                                       |
| N | A1LIN5 | DR | liver development                                                                                                                                                                                                                             |
| N | A1LIN5 | DR | otic placode formation                                                                                                                                                                                                                        |
| N | A1LIN5 | DR | otolith morphogenesis                                                                                                                                                                                                                         |
| N | A1LIN5 | DR | pancreas development                                                                                                                                                                                                                          |
| N | A1LIN5 | DR | regulation of transcription, DNA-dependent                                                                                                                                                                                                    |
| N | A1LIN5 | DR | rhombomere 5 morphogenesis                                                                                                                                                                                                                    |
| N | A1LIN5 | DR | rhombomere 6 morphogenesis                                                                                                                                                                                                                    |
| N | A1LIN5 | DR | semicircular canal morphogenesis                                                                                                                                                                                                              |
| N | A1LIN5 | DR | sequence-specific DNA binding                                                                                                                                                                                                                 |
| N | A1LIN5 | DR | sequence-specific DNA binding transcription factor activity                                                                                                                                                                                   |
| N | A1LIN5 | DR | transcription activator activity                                                                                                                                                                                                              |
| N | A1LIN5 | DR | tube formation                                                                                                                                                                                                                                |
| N | A1L253 | DE | Protein FAM149B1;                                                                                                                                                                                                                             |
| N | A1L3K1 | CC | Catalyzes the covalent attachment of ubiquitin to other proteins<br>Acts as an essential factor of the anaphase promoting complex/cyclosome                                                                                                   |
| N | A1L3K1 | CC | (APC/C), a cell cycle-regulated ubiquitin ligase that controls progression through mitosis                                                                                                                                                    |
| N | A1L3K1 | CC | Acts by specifically elongating 'Lys-11'-linked polyubiquitin chains initiated by the E2 enzyme ube2c/ubch10 on APC/C substrates, enhancing the degradation of APC/C substrates by the proteasome and promoting mitotic exit (By similarity). |
| N | A1L3K1 | DE | Ubiquitin carrier protein S-A;                                                                                                                                                                                                                |
| N | A1L3K1 | DE | Ubiquitin-conjugating enzyme E2 S-A;                                                                                                                                                                                                          |
| N | A1L3K1 | DE | Ubiquitin-protein ligase S-A;                                                                                                                                                                                                                 |
| N | A1L3K1 | DR | activation of anaphase-promoting complex activity                                                                                                                                                                                             |
| N | A1L3K1 | DR | anaphase-promoting complex-dependent proteasomal ubiquitin-dependent protein catabolic process                                                                                                                                                |
| N | A1L3K1 | DR | cell division                                                                                                                                                                                                                                 |
| N | A1L3K1 | DR | exit from mitosis                                                                                                                                                                                                                             |
| N | A1L3K1 | DR | free ubiquitin chain polymerization                                                                                                                                                                                                           |
| N | A1L3K1 | DR | post-translational protein modification                                                                                                                                                                                                       |
| N | A1L3K1 | DR | protein K11-linked ubiquitination                                                                                                                                                                                                             |
| N | A1L3K1 | DR | ubiquitin-protein ligase activity                                                                                                                                                                                                             |
| N | A1L3X0 | CC | Condensing enzyme that catalyzes the synthesis of saturated and polyunsaturated very long chain fatty acids                                                                                                                                   |
| N | A1L3X0 | CC | Highest activity toward C18 acyl-CoAs, especially C18:3(n-3) acyl-CoAs.                                                                                                                                                                       |
| N | A1L3X0 | DE | 3-keto acyl-CoA synthase ELOVL7;                                                                                                                                                                                                              |
| N | A1L3X0 | DE | Elongation of very long chain fatty acids protein 7;                                                                                                                                                                                          |
| N | A1L3X0 | DR | fatty acid elongase activity                                                                                                                                                                                                                  |
| N | A1L3X0 | DR | fatty acid elongation, polyunsaturated fatty acid                                                                                                                                                                                             |

|   |        |    |                                                                                                                                                                                                                                                         |
|---|--------|----|---------------------------------------------------------------------------------------------------------------------------------------------------------------------------------------------------------------------------------------------------------|
| N | A1L3X0 | DR | long-chain fatty-acyl-CoA biosynthetic process                                                                                                                                                                                                          |
| N | A1L3X0 | DR | protein binding                                                                                                                                                                                                                                         |
| N | A1L3X0 | DR | triglyceride biosynthetic process                                                                                                                                                                                                                       |
| N | A1L3X0 | DR | very long-chain fatty acid biosynthetic process                                                                                                                                                                                                         |
| N | A1QZD0 | DE | 30S ribosomal protein S9;                                                                                                                                                                                                                               |
| N | A1QZD0 | DR | structural constituent of ribosome                                                                                                                                                                                                                      |
| N | A1R6H1 | DE | Phosphoglycerate kinase;                                                                                                                                                                                                                                |
| N | A1R6H1 | DR | phosphoglycerate kinase activity                                                                                                                                                                                                                        |
| N | A1RET8 | CC | Phosphorolytic exoribonuclease that removes nucleotide residues following the - CCA terminus of tRNA and adds nucleotides to the ends of RNA molecules by using nucleoside diphosphates as substrates (By similarity).                                  |
| N | A1RET8 | DE | Ribonuclease PH;                                                                                                                                                                                                                                        |
| N | A1RET8 | DE | tRNA nucleotidyltransferase;                                                                                                                                                                                                                            |
| N | A1RET8 | DR | 3'-5'-exoribonuclease activity                                                                                                                                                                                                                          |
| N | A1RET8 | DR | tRNA nucleotidyltransferase activity                                                                                                                                                                                                                    |
| N | A1RET8 | DR | tRNA processing                                                                                                                                                                                                                                         |
| N | A1RET8 | DR | tRNA-specific ribonuclease activity                                                                                                                                                                                                                     |
| N | A1RFM0 | CC | Responsible for the addition of glutamate residues to the C-terminus of ribosomal protein S6 (By similarity).                                                                                                                                           |
| N | A1RFM0 | DE | Ribosomal protein S6 modification protein 1;                                                                                                                                                                                                            |
| N | A1RFM0 | DR | ligase activity                                                                                                                                                                                                                                         |
| N | A1RFM0 | DR | metal ion binding                                                                                                                                                                                                                                       |
| N | A1RFM0 | DR | protein modification process                                                                                                                                                                                                                            |
| N | A1RIP7 | CC | Catalyzes a salvage reaction resulting in the formation of AMP, that is energetically less costly than de novo synthesis (By similarity).                                                                                                               |
| N | A1RIP7 | DE | Adenine phosphoribosyltransferase;                                                                                                                                                                                                                      |
| N | A1RIP7 | DR | adenine phosphoribosyltransferase activity                                                                                                                                                                                                              |
| N | A1RIP7 | DR | adenine salvage                                                                                                                                                                                                                                         |
| N | A1RIP7 | DR | purine ribonucleoside salvage                                                                                                                                                                                                                           |
| N | A1RMT4 | CC | Catalyzes two reactions: the first one is the production of beta-formylglycinamide ribonucleotide (GAR) from formate, ATP and beta GAR; the second, a side reaction, is the production of acetyl phosphate and ADP from acetate and ATP (By similarity) |
| N | A1RMT4 | DE | 5'-phosphoribosylglycinamide transformylase 2;                                                                                                                                                                                                          |
| N | A1RMT4 | DE | Formate-dependent GAR transformylase;                                                                                                                                                                                                                   |
| N | A1RMT4 | DE | GAR transformylase 2;                                                                                                                                                                                                                                   |
| N | A1RMT4 | DE | Phosphoribosylglycinamide formyltransferase 2;                                                                                                                                                                                                          |
| N | A1RMT4 | DR | hydroxymethyl-, formyl- and related transferase activity                                                                                                                                                                                                |
| N | A1RMT4 | DR | ligase activity                                                                                                                                                                                                                                         |
| N | A1RMT4 | DR | magnesium ion binding                                                                                                                                                                                                                                   |
| N | A1RMT4 | DR | purine ribonucleotide biosynthetic process                                                                                                                                                                                                              |
| N | A1RMV7 | DE | 50S ribosomal protein L27;                                                                                                                                                                                                                              |
| N | A1RMV7 | DR | structural constituent of ribosome                                                                                                                                                                                                                      |
| N | A1RNM8 | CC | Displays ATPase and GTPase activities (By similarity).                                                                                                                                                                                                  |
| N | A1RNM8 | DE | UPF0042 nucleotide-binding protein Sptw3181_3461;                                                                                                                                                                                                       |
| N | A1RQQ2 | DE | FGAM synthase II;                                                                                                                                                                                                                                       |
| N | A1RQQ2 | DE | Phosphoribosylformylglycinamide synthase 2;                                                                                                                                                                                                             |
| N | A1RQQ2 | DE | Phosphoribosylformylglycinamide synthase II;                                                                                                                                                                                                            |
| N | A1RQQ2 | DR | 'de novo' IMP biosynthetic process                                                                                                                                                                                                                      |
| N | A1RQQ2 | DR | phosphoribosylformylglycinamide synthase activity                                                                                                                                                                                                       |
| N | A1RU37 | CC | With S4 and S12 plays an important role in translational accuracy (By similarity)                                                                                                                                                                       |
| N | A1RU37 | DE | 30S ribosomal protein S5P;                                                                                                                                                                                                                              |
| N | A1RU37 | DR | structural constituent of ribosome                                                                                                                                                                                                                      |
| N | A1RWQ7 | CC | One of the primary rRNA binding proteins                                                                                                                                                                                                                |
| N | A1RWQ7 | CC | It has been suggested to have peptidyltransferase activity, this is somewhat controversial                                                                                                                                                              |
| N | A1RWQ7 | CC | Makes several contacts with the 16S rRNA in the 70S ribosome (By similarity).                                                                                                                                                                           |
| N | A1RWQ7 | CC | Required for association of the 30S and 50S subunits to form the 70S ribosome, for tRNA binding and peptide bond formation                                                                                                                              |
| N | A1RWQ7 | DE | 50S ribosomal protein L2P;                                                                                                                                                                                                                              |
| N | A1RWQ7 | DR | structural constituent of ribosome                                                                                                                                                                                                                      |
| N | A1RWX6 | DE | 50S ribosomal protein L40e;                                                                                                                                                                                                                             |
| N | A1S227 | CC | One of the primary rRNA binding proteins, it binds specifically to the 5'-end of 16S ribosomal RNA (By similarity).                                                                                                                                     |
| N | A1S227 | DE | 30S ribosomal protein S17;                                                                                                                                                                                                                              |
| N | A1S227 | DR | structural constituent of ribosome                                                                                                                                                                                                                      |
| N | A1S467 | CC | Involved in mRNA degradation                                                                                                                                                                                                                            |

|   |        |    |                                                                                                                                                                                                                                                                                |
|---|--------|----|--------------------------------------------------------------------------------------------------------------------------------------------------------------------------------------------------------------------------------------------------------------------------------|
| N | A1S467 | CC | Hydrolyzes single-stranded polyribonucleotides processively in the 3'- to 5'- direction (By similarity).                                                                                                                                                                       |
| N | A1S467 | DE | Polynucleotide phosphorylase;                                                                                                                                                                                                                                                  |
| N | A1S467 | DE | Polyribonucleotide nucleotidyltransferase;                                                                                                                                                                                                                                     |
| N | A1S467 | DR | 3'-5'-exoribonuclease activity                                                                                                                                                                                                                                                 |
| N | A1S467 | DR | RNA processing                                                                                                                                                                                                                                                                 |
| N | A1S467 | DR | mRNA catabolic process                                                                                                                                                                                                                                                         |
| N | A1S467 | DR | polyribonucleotide nucleotidyltransferase activity<br>Catalyzes a reversible aldol reaction between acetaldehyde and D-<br>glyceraldehyde 3-phosphate to generate 2-deoxy- D-ribose 5-phosphate (By<br>similarity)                                                             |
| N | A1S474 | CC | 2-deoxy-D-ribose 5-phosphate aldolase;                                                                                                                                                                                                                                         |
| N | A1S474 | DE | Deoxyriboaldolase;                                                                                                                                                                                                                                                             |
| N | A1S474 | DE | Deoxyribose-phosphate aldolase;                                                                                                                                                                                                                                                |
| N | A1S474 | DE | Phosphodeoxyriboaldolase;                                                                                                                                                                                                                                                      |
| N | A1S474 | DR | deoxyribonucleotide catabolic process                                                                                                                                                                                                                                          |
| N | A1S474 | DR | deoxyribose-phosphate aldolase activity                                                                                                                                                                                                                                        |
| N | A1S579 | DE | Acylphosphatase;                                                                                                                                                                                                                                                               |
| N | A1S579 | DE | Acylphosphate phosphohydrolase;                                                                                                                                                                                                                                                |
| N | A1S579 | DR | acylphosphatase activity                                                                                                                                                                                                                                                       |
| N | A1S859 | CC | GTPase that plays an essential role in the late steps of ribosome biogenesis (By<br>similarity).                                                                                                                                                                               |
| N | A1S859 | DE | GTP-binding protein EngA;                                                                                                                                                                                                                                                      |
| N | A1S859 | DR | nucleoside-triphosphatase activity                                                                                                                                                                                                                                             |
| N | A1S859 | DR | ribosome biogenesis                                                                                                                                                                                                                                                            |
| N | A1SAS5 | DE | Dihydroxy-acid dehydratase;                                                                                                                                                                                                                                                    |
| N | A1SAS5 | DR | 4 iron, 4 sulfur cluster binding                                                                                                                                                                                                                                               |
| N | A1SAS5 | DR | branched chain family amino acid biosynthetic process                                                                                                                                                                                                                          |
| N | A1SAS5 | DR | dihydroxy-acid dehydratase activity                                                                                                                                                                                                                                            |
| N | A1SAS5 | DR | metal ion binding                                                                                                                                                                                                                                                              |
| N | A1SBV0 | CC | Specifically methylates the N7 position of guanosine in position 527 of 16S<br>rRNA (By similarity).                                                                                                                                                                           |
| N | A1SBV0 | DE | 16S rRNA 7-methylguanosine methyltransferase;                                                                                                                                                                                                                                  |
| N | A1SBV0 | DE | 16S rRNA m7G methyltransferase;                                                                                                                                                                                                                                                |
| N | A1SBV0 | DE | Ribosomal RNA small subunit methyltransferase G;                                                                                                                                                                                                                               |
| N | A1SBV0 | DR | rRNA methyltransferase activity                                                                                                                                                                                                                                                |
| N | A1SHI6 | CC | F(1)F(0) ATP synthase produces ATP from ADP in the presence of a proton or<br>sodium gradient<br>During catalysis, ATP synthesis in the catalytic domain of F(1) is coupled via a<br>rotary mechanism of the central stalk subunits to proton translocation (By<br>similarity) |
| N | A1SHI6 | CC | F-type ATPases consist of two structural domains, F(1) containing the<br>extramembraneous catalytic core and F(0) containing the membrane proton<br>channel, linked together by a central stalk and a peripheral stalk                                                         |
| N | A1SHI6 | DE | ATP synthase F(0) sector subunit c;                                                                                                                                                                                                                                            |
| N | A1SHI6 | DE | ATP synthase subunit c;                                                                                                                                                                                                                                                        |
| N | A1SHI6 | DE | F-ATPase subunit c;                                                                                                                                                                                                                                                            |
| N | A1SHI6 | DE | F-type ATPase subunit c;                                                                                                                                                                                                                                                       |
| N | A1SHI6 | DE | Lipid-binding protein;                                                                                                                                                                                                                                                         |
| N | A1SHI6 | DR | ATP hydrolysis coupled proton transport                                                                                                                                                                                                                                        |
| N | A1SHI6 | DR | ATP synthesis coupled proton transport                                                                                                                                                                                                                                         |
| N | A1SHI6 | DR | hydrogen ion transmembrane transporter activity                                                                                                                                                                                                                                |
| N | A1SHI6 | DR | lipid binding                                                                                                                                                                                                                                                                  |
| N | A1SL79 | CC | Cell wall formation (By similarity).                                                                                                                                                                                                                                           |
| N | A1SL79 | DE | UDP-N-acetylmuramate--L-alanine ligase;                                                                                                                                                                                                                                        |
| N | A1SL79 | DE | UDP-N-acetylmuramoyl-L-alanine synthetase;                                                                                                                                                                                                                                     |
| N | A1SL79 | DR | UDP-N-acetylmuramate-L-alanine ligase activity                                                                                                                                                                                                                                 |
| N | A1SL79 | DR | cell division                                                                                                                                                                                                                                                                  |
| N | A1SL79 | DR | cellular cell wall organization                                                                                                                                                                                                                                                |
| N | A1SL79 | DR | peptidoglycan biosynthetic process                                                                                                                                                                                                                                             |
| N | A1SL79 | DR | regulation of cell shape                                                                                                                                                                                                                                                       |
| N | A1SNC7 | CC | Negatively regulates transcription of bacterial ribonucleotide reductase nrd genes<br>and operons by binding to NrdR- boxes (By similarity).                                                                                                                                   |
| N | A1SNC7 | DE | Transcriptional repressor NrdR;                                                                                                                                                                                                                                                |
| N | A1SNC7 | DR | transcription repressor activity                                                                                                                                                                                                                                               |
| N | A1SNC7 | DR | zinc ion binding                                                                                                                                                                                                                                                               |
| N | A1SR48 | DE | Mannitol-1-phosphate 5-dehydrogenase;                                                                                                                                                                                                                                          |

|   |        |    |                                                                                                                                                                                                                                         |
|---|--------|----|-----------------------------------------------------------------------------------------------------------------------------------------------------------------------------------------------------------------------------------------|
| N | A1SR48 | DR | coenzyme binding                                                                                                                                                                                                                        |
| N | A1SR48 | DR | mannitol-1-phosphate 5-dehydrogenase activity                                                                                                                                                                                           |
| N | A1SR48 | DR | oxidation-reduction process                                                                                                                                                                                                             |
| N | A1SRU1 | CC | Catalyzes the interconversion of beta-pyran and beta- furan forms of D-ribose (By similarity).                                                                                                                                          |
| N | A1SRU1 | DE | D-ribose pyranase;                                                                                                                                                                                                                      |
| N | A1SRU1 | DR | carbohydrate metabolic process                                                                                                                                                                                                          |
| N | A1SRU1 | DR | carbohydrate transport                                                                                                                                                                                                                  |
| N | A1SRU1 | DR | intramolecular lyase activity                                                                                                                                                                                                           |
| N | A1T1A5 | CC | EXHIBITS S-adenosyl-L-methionine-dependent methyltransferase activity (By similarity)                                                                                                                                                   |
| N | A1T1A5 | DE | Putative S-adenosyl-L-methionine-dependent methyltransferase Mvan_0104;                                                                                                                                                                 |
| N | A1T1A5 | DR | methyltransferase activity                                                                                                                                                                                                              |
| N | A1T5Z3 | DE | 3-phosphoshikimate 1-carboxyvinyltransferase;                                                                                                                                                                                           |
| N | A1T5Z3 | DE | 5-enolpyruvylshikimate-3-phosphate synthase;                                                                                                                                                                                            |
| N | A1T5Z3 | DE | EPSP synthase;                                                                                                                                                                                                                          |
| N | A1T5Z3 | DR | 3-phosphoshikimate 1-carboxyvinyltransferase activity                                                                                                                                                                                   |
| N | A1T5Z3 | DR | aromatic amino acid family biosynthetic process                                                                                                                                                                                         |
| N | A1T8F3 | DE | 5-enolpyruvylshikimate-3-phosphate phospholyase;                                                                                                                                                                                        |
| N | A1T8F3 | DE | Chorismate synthase;                                                                                                                                                                                                                    |
| N | A1T8F3 | DR | aromatic amino acid family biosynthetic process                                                                                                                                                                                         |
| N | A1T8F3 | DR | chorismate synthase activity                                                                                                                                                                                                            |
| N | A1TJA3 | CC | ATP-dependent carboxylate-amine ligase (By similarity).                                                                                                                                                                                 |
| N | A1TJA3 | DE | Carboxylate-amine ligase Aave_0434;                                                                                                                                                                                                     |
| N | A1TJA3 | DR | glutamate-cysteine ligase activity                                                                                                                                                                                                      |
| N | A1TJA3 | DR | glutathione biosynthetic process                                                                                                                                                                                                        |
| N | A1TLL7 | CC | NDH-1 shuttles electrons from NADH, via FMN and iron- sulfur (Fe-S) centers, to quinones in the respiratory chain                                                                                                                       |
| N | A1TLL7 | CC | Couples the redox reaction to proton translocation (for every two electrons transferred, four hydrogen ions are translocated across the cytoplasmic membrane), and thus conserves the redox energy in a proton gradient (By similarity) |
| N | A1TLL7 | DE | NADH dehydrogenase I subunit B;                                                                                                                                                                                                         |
| N | A1TLL7 | DE | NADH-quinone oxidoreductase subunit B;                                                                                                                                                                                                  |
| N | A1TLL7 | DE | NDH-1 subunit B;                                                                                                                                                                                                                        |
| N | A1TLL7 | DR | 4 iron, 4 sulfur cluster binding                                                                                                                                                                                                        |
| N | A1TLL7 | DR | NADH dehydrogenase (ubiquinone) activity                                                                                                                                                                                                |
| N | A1TLL7 | DR | metal ion binding                                                                                                                                                                                                                       |
| N | A1TLL7 | DR | oxidation-reduction process                                                                                                                                                                                                             |
| N | A1TLL7 | DR | quinone binding                                                                                                                                                                                                                         |
| N | A1TPW5 | DE | D-serine deaminase;                                                                                                                                                                                                                     |
| N | A1TPW5 | DE | Probable D-serine dehydratase;                                                                                                                                                                                                          |
| N | A1TPW5 | DR | D-amino acid metabolic process                                                                                                                                                                                                          |
| N | A1TPW5 | DR | D-serine ammonia-lyase activity                                                                                                                                                                                                         |
| N | A1TPW5 | DR | pyridoxal phosphate binding                                                                                                                                                                                                             |
| N | A1TQ96 | CC | Catalyzes the reversible transfer of the terminal phosphate group between ATP and AMP                                                                                                                                                   |
| N | A1TQ96 | CC | This small ubiquitous enzyme involved in the energy metabolism and nucleotide synthesis, is essential for maintenance and cell growth (By similarity).                                                                                  |
| N | A1TQ96 | DE | ATP-AMP transphosphorylase;                                                                                                                                                                                                             |
| N | A1TQ96 | DE | Adenylate kinase;                                                                                                                                                                                                                       |
| N | A1TQ96 | DR | adenylate kinase activity                                                                                                                                                                                                               |
| N | A1TQ96 | DR | nucleotide biosynthetic process                                                                                                                                                                                                         |
| N | A1TRE4 | DE | Histidine ammonia-lyase;                                                                                                                                                                                                                |
| N | A1TRE4 | DR | biosynthetic process                                                                                                                                                                                                                    |
| N | A1TRE4 | DR | histidine ammonia-lyase activity                                                                                                                                                                                                        |
| N | A1TRE4 | DR | histidine catabolic process                                                                                                                                                                                                             |
| N | A1TT41 | CC | Hydrolyzes non-standard nucleotides such as XTP and dITP/ITP                                                                                                                                                                            |
| N | A1TT41 | CC | Might exclude non-standard purines from DNA precursor pool, preventing thus incorporation into DNA and avoiding chromosomal lesions (By similarity).                                                                                    |
| N | A1TT41 | DE | Nucleoside triphosphate phosphohydrolase;                                                                                                                                                                                               |
| N | A1TT41 | DE | Nucleoside-triphosphatase;                                                                                                                                                                                                              |
| N | A1TT41 | DR | nucleoside-triphosphatase activity                                                                                                                                                                                                      |
| N | A1TWI0 | CC | Catalyzes a salvage reaction resulting in the formation of AMP, that is energetically less costly than de novo synthesis (By similarity).                                                                                               |
| N | A1TWI0 | DE | Adenine phosphoribosyltransferase;                                                                                                                                                                                                      |
| N | A1TWI0 | DR | adenine phosphoribosyltransferase activity                                                                                                                                                                                              |



|   |        |    |                                                                                                                                                                       |
|---|--------|----|-----------------------------------------------------------------------------------------------------------------------------------------------------------------------|
| N | A1TWI0 | DR | adenine salvage                                                                                                                                                       |
| N | A1TWI0 | DR | purine ribonucleoside salvage                                                                                                                                         |
| N | A1TZ73 | DE | AIR synthase;                                                                                                                                                         |
| N | A1TZ73 | DE | Phosphoribosyl-aminoimidazole synthetase;                                                                                                                             |
| N | A1TZ73 | DE | Phosphoribosylformylglycinamide cyclo-ligase;                                                                                                                         |
| N | A1TZ73 | DR | 'de novo' IMP biosynthetic process                                                                                                                                    |
| N | A1TZ73 | DR | phosphoribosylformylglycinamide cyclo-ligase activity                                                                                                                 |
| N | A1TZ94 | CC | Could accelerate the degradation of some genes transcripts potentially through selective RNA binding (By similarity).                                                 |
| N | A1TZ94 | DE | Carbon storage regulator homolog;                                                                                                                                     |
| N | A1TZ94 | DR | mRNA catabolic process                                                                                                                                                |
| N | A1TZ94 | DR | regulation of carbohydrate metabolic process                                                                                                                          |
| N | A1UA84 | CC | Plays an important role in the de novo pathway of purine nucleotide biosynthesis                                                                                      |
| N | A1UA84 | CC | Catalyzes the first committed step in the biosynthesis of AMP from IMP (By similarity)                                                                                |
| N | A1UA84 | DE | Adenylosuccinate synthetase;                                                                                                                                          |
| N | A1UA84 | DE | IMP--aspartate ligase;                                                                                                                                                |
| N | A1UA84 | DR | adenylosuccinate synthase activity                                                                                                                                    |
| N | A1UA84 | DR | magnesium ion binding                                                                                                                                                 |
| N | A1UA84 | DR | purine nucleotide biosynthetic process                                                                                                                                |
| N | A1UC06 | CC | Catalyzes the conversion of glucosamine-6-phosphate to glucosamine-1-phosphate (By similarity).                                                                       |
| N | A1UC06 | DE | Phosphoglucosamine mutase;                                                                                                                                            |
| N | A1UC06 | DR | carbohydrate metabolic process                                                                                                                                        |
| N | A1UC06 | DR | magnesium ion binding                                                                                                                                                 |
| N | A1UC06 | DR | phosphoglucosamine mutase activity                                                                                                                                    |
| N | A1UED9 | DE | Acylphosphatase;                                                                                                                                                      |
| N | A1UED9 | DE | Acylphosphate phosphohydrolase;                                                                                                                                       |
| N | A1UED9 | DR | acylphosphatase activity                                                                                                                                              |
| N | A1UMI0 | CC | Catalyzes the condensation of pantoate with beta-alanine in an ATP-dependent reaction via a pantoyl-adenylate intermediate (By similarity).                           |
| N | A1UMI0 | DE | Pantoate--beta-alanine ligase;                                                                                                                                        |
| N | A1UMI0 | DE | Pantoate-activating enzyme;                                                                                                                                           |
| N | A1UMI0 | DE | Pantothenate synthetase;                                                                                                                                              |
| N | A1UMI0 | DR | pantoate-beta-alanine ligase activity                                                                                                                                 |
| N | A1UMI0 | DR | pantothenate biosynthetic process                                                                                                                                     |
| N | A1USQ7 | CC | Binds 16S rRNA, required for the assembly of 50S particles and may also be responsible for determining the conformation of the 16S rRNA at the A site (By similarity) |
| N | A1USQ7 | DE | 30S ribosomal protein S14;                                                                                                                                            |
| N | A1USQ7 | DR | structural constituent of ribosome                                                                                                                                    |
| N | A1UUA2 | DE | Nicotinate phosphoribosyltransferase;                                                                                                                                 |
| N | A1UUA2 | DR | NAD biosynthetic process                                                                                                                                              |
| N | A1UUA2 | DR | nicotinate nucleotide biosynthetic process                                                                                                                            |
| N | A1UUA2 | DR | nicotinate phosphoribosyltransferase activity                                                                                                                         |
| N | A1UUA2 | DR | nicotinate-nucleotide diphosphorylase (carboxylating) activity                                                                                                        |
| N | A1V878 | CC | One of the primary rRNA binding proteins, it binds directly to 16S rRNA where it nucleates assembly of the body of the 30S subunit (By similarity).                   |
| N | A1V878 | DE | 30S ribosomal protein S4;                                                                                                                                             |
| N | A1V878 | DR | structural constituent of ribosome                                                                                                                                    |
| N | A1V905 | CC | Probably deamidates glutamine residues to glutamate on methyl-accepting chemotaxis receptors (MCPs), playing an important role in chemotaxis (By similarity)          |
| N | A1V905 | DE | Probable chemoreceptor glutamine deamidase CheD;                                                                                                                      |
| N | A1V905 | DR | protein-glutamine glutaminase activity                                                                                                                                |
| N | A1VDQ7 | CC | Protease subunit of a proteasome-like degradation complex believed to be a general protein degrading machinery (By similarity).                                       |
| N | A1VDQ7 | DE | ATP-dependent protease subunit HsIV;                                                                                                                                  |
| N | A1VDQ7 | DR | metal ion binding                                                                                                                                                     |
| N | A1VDQ7 | DR | proteolysis involved in cellular protein catabolic process                                                                                                            |
| N | A1VDQ7 | DR | threonine-type endopeptidase activity                                                                                                                                 |
| N | A1VE87 | CC | Synthesizes selenophosphate from selenide and ATP (By similarity).                                                                                                    |
| N | A1VE87 | DE | Selenide, water dikinase;                                                                                                                                             |
| N | A1VE87 | DE | Selenium donor protein;                                                                                                                                               |
| N | A1VE87 | DE | Selenophosphate synthase;                                                                                                                                             |
| N | A1VE87 | DR | selenide, water dikinase activity                                                                                                                                     |
| N | A1VEA9 | CC | Binds 23S rRNA and is also seen to make contacts with the A and possibly P site tRNAs (By similarity).                                                                |

|   |        |    |                                                                                                                                                                                                                                             |
|---|--------|----|---------------------------------------------------------------------------------------------------------------------------------------------------------------------------------------------------------------------------------------------|
| N | A1VEA9 | DE | 50S ribosomal protein L16;                                                                                                                                                                                                                  |
| N | A1VEA9 | DR | structural constituent of ribosome                                                                                                                                                                                                          |
| N | A1VEB3 | CC | One of the primary rRNA binding proteins                                                                                                                                                                                                    |
| N | A1VEB3 | CC | it has been suggested to have peptidyltransferase activity; this is somewhat controversial                                                                                                                                                  |
| N | A1VEB3 | CC | Makes several contacts with the 16S rRNA in the 70S ribosome (By similarity).                                                                                                                                                               |
| N | A1VEB3 | CC | Required for association of the 30S and 50S subunits to form the 70S ribosome, for tRNA binding and peptide bond formation                                                                                                                  |
| N | A1VEB3 | DE | 50S ribosomal protein L2;                                                                                                                                                                                                                   |
| N | A1VEB3 | DR | structural constituent of ribosome                                                                                                                                                                                                          |
| N | A1VEB3 | DR | transferase activity                                                                                                                                                                                                                        |
| N | A1VEP0 | CC | Is an aliphatic amidase with a restricted substrate specificity, as it only hydrolyzes formamide (By similarity).                                                                                                                           |
| N | A1VEP0 | DE | Formamidase;                                                                                                                                                                                                                                |
| N | A1VEP0 | DE | Formamide amidohydrolase;                                                                                                                                                                                                                   |
| N | A1VEP0 | DR | formamidase activity                                                                                                                                                                                                                        |
| N | A1VEP0 | DR | nitrogen compound metabolic process                                                                                                                                                                                                         |
| N | A1VXZ8 | CC | Involved in the biosynthesis of lipid A, a phosphorylated glycolipid that anchors the lipopolysaccharide to the outer membrane of the cell (By similarity).                                                                                 |
| N | A1VXZ8 | DE | Acyl-[acyl-carrier-protein]-UDP-N-acetylglucosamine O-acyltransferase;                                                                                                                                                                      |
| N | A1VXZ8 | DE | UDP-N-acetylglucosamine acyltransferase;                                                                                                                                                                                                    |
| N | A1VXZ8 | DR | acyl-[acyl-carrier-protein]-UDP-N-acetylglucosamine O-acyltransferase activity                                                                                                                                                              |
| N | A1VXZ8 | DR | lipid A biosynthetic process                                                                                                                                                                                                                |
| N | A1W0I1 | CC | Allows the formation of correctly charged Asn-tRNA(Asn) or Gln-tRNA(Gln) through the transamidation of misacylated Asp- tRNA(Asn) or Glu-tRNA(Gln) in organisms which lack either or both of asparaginyl-tRNA or glutaminy-tRNA synthetases |
| N | A1W0I1 | CC | The reaction takes place in the presence of glutamine and ATP through an activated phospho-Asp-tRNA(Asn) or phospho-Glu-tRNA(Gln) (By similarity).                                                                                          |
| N | A1W0I1 | DE | Asp/Glu-ADT subunit B;                                                                                                                                                                                                                      |
| N | A1W0I1 | DE | Aspartyl/glutamyl-tRNA(Asn/Gln) amidotransferase subunit B;                                                                                                                                                                                 |
| N | A1W0I1 | DR | carbon-nitrogen ligase activity, with glutamine as amido-N-donor                                                                                                                                                                            |
| N | A1W0X9 | CC | The ruvA-ruvB complex in the presence of ATP renatures cruciform structure in supercoiled DNA with palindromic sequence, indicating that it may promote strand exchange reactions in homologous recombination                               |
| N | A1W0X9 | CC | RuvAB is an helicase that mediates the Holliday junction migration by localized denaturation and reannealing (By similarity).                                                                                                               |
| N | A1W0X9 | DE | Holliday junction ATP-dependent DNA helicase ruvB;                                                                                                                                                                                          |
| N | A1W0X9 | DR | DNA recombination                                                                                                                                                                                                                           |
| N | A1W0X9 | DR | four-way junction helicase activity                                                                                                                                                                                                         |
| N | A1W1V8 | CC | One of the early assembly proteins it binds 23S rRNA                                                                                                                                                                                        |
| N | A1W1V8 | CC | forms the main docking site for trigger factor binding to the ribosome (By similarity)                                                                                                                                                      |
| N | A1W1V8 | CC | One of the proteins that surrounds the polypeptide exit tunnel on the outside of the ribosome                                                                                                                                               |
| N | A1W1V8 | DE | 50S ribosomal protein L23;                                                                                                                                                                                                                  |
| N | A1W1V8 | DR | nucleotide binding                                                                                                                                                                                                                          |
| N | A1W1V8 | DR | structural constituent of ribosome                                                                                                                                                                                                          |
| N | A1W2Z7 | DE | Anthranilate phosphoribosyltransferase;                                                                                                                                                                                                     |
| N | A1W2Z7 | DR | anthranilate phosphoribosyltransferase activity                                                                                                                                                                                             |
| N | A1W2Z7 | DR | tryptophan biosynthetic process                                                                                                                                                                                                             |
| N | A1W333 | CC | DNA-dependent RNA polymerase catalyzes the transcription of DNA into RNA using the four ribonucleoside triphosphates as substrates.                                                                                                         |
| N | A1W333 | DE | DNA-directed RNA polymerase subunit alpha;                                                                                                                                                                                                  |
| N | A1W333 | DE | RNA polymerase subunit alpha;                                                                                                                                                                                                               |
| N | A1W333 | DE | RNAP subunit alpha;                                                                                                                                                                                                                         |
| N | A1W333 | DE | Transcriptase subunit alpha;                                                                                                                                                                                                                |
| N | A1W333 | DR | DNA-directed RNA polymerase activity                                                                                                                                                                                                        |
| N | A1W333 | DR | protein dimerization activity                                                                                                                                                                                                               |
| N | A1WB12 | CC | Catalyzes the pyruvoyl-dependent decarboxylation of aspartate to produce beta-alanine (By similarity).                                                                                                                                      |
| N | A1WB12 | DE | Aspartate 1-decarboxylase alpha chain;                                                                                                                                                                                                      |
| N | A1WB12 | DE | Aspartate 1-decarboxylase beta chain;                                                                                                                                                                                                       |
| N | A1WB12 | DE | Aspartate 1-decarboxylase;                                                                                                                                                                                                                  |
| N | A1WB12 | DE | Aspartate alpha-decarboxylase;                                                                                                                                                                                                              |
| N | A1WB12 | DR | alanine biosynthetic process                                                                                                                                                                                                                |
| N | A1WB12 | DR | aspartate 1-decarboxylase activity                                                                                                                                                                                                          |
| N | A1WB12 | DR | pantothenate biosynthetic process                                                                                                                                                                                                           |

|   |         |    |                                                                                                                                                                                                                                      |
|---|---------|----|--------------------------------------------------------------------------------------------------------------------------------------------------------------------------------------------------------------------------------------|
| N | A1W GK3 | CC | Binds as a heterodimer with protein S6 to the central domain of the 16S rRNA, where it helps stabilize the platform of the 30S subunit (By similarity).                                                                              |
| N | A1W GK3 | DE | 30S ribosomal protein S18;                                                                                                                                                                                                           |
| N | A1W GK3 | DR | structural constituent of ribosome                                                                                                                                                                                                   |
| N | A1WH89  | DE | Acetylglutamate kinase;                                                                                                                                                                                                              |
| N | A1WH89  | DE | N-acetyl-L-glutamate 5-phosphotransferase;                                                                                                                                                                                           |
| N | A1WH89  | DR | acetylglutamate kinase activity                                                                                                                                                                                                      |
| N | A1WH89  | DR | arginine biosynthetic process                                                                                                                                                                                                        |
| N | A1WH89  | DR | glutamate 5-kinase activity                                                                                                                                                                                                          |
| N | A1WH89  | DR | proline biosynthetic process                                                                                                                                                                                                         |
| N | A1WX11  | CC | Involved in the biosynthesis of lipid A, a phosphorylated glycolipid that anchors the lipopolysaccharide to the outer membrane of the cell (By similarity).                                                                          |
| N | A1WX11  | DE | Acyl-[acyl-carrier-protein]--UDP-N-acetylglucosamine O-acyltransferase;                                                                                                                                                              |
| N | A1WX11  | DE | UDP-N-acetylglucosamine acyltransferase;                                                                                                                                                                                             |
| N | A1WX11  | DR | acyl-[acyl-carrier-protein]-UDP-N-acetylglucosamine O-acyltransferase activity                                                                                                                                                       |
| N | A1WX11  | DR | lipid A biosynthetic process                                                                                                                                                                                                         |
| N | A1W XV0 | CC | Associates with free 30S ribosomal subunits (but not with 30S subunits that are part of 70S ribosomes or polysomes)                                                                                                                  |
| N | A1W XV0 | CC | Essential for efficient processing of 16S rRNA                                                                                                                                                                                       |
| N | A1W XV0 | CC | May interact with the 5'-terminal helix region of 16S rRNA (By similarity).                                                                                                                                                          |
| N | A1W XV0 | DE | Ribosome-binding factor A;                                                                                                                                                                                                           |
| N | A1W XV0 | DR | rRNA processing                                                                                                                                                                                                                      |
| N | A1W YT0 | CC | Catalyzes the decarboxylation of S-adenosylmethionine to S-adenosylmethioninamine (dcAdoMet), the propylamine donor required for the synthesis of the polyamines spermine and spermidine from the diamine putrescine (By similarity) |
| N | A1W YT0 | DE | S-adenosylmethionine decarboxylase alpha chain;                                                                                                                                                                                      |
| N | A1W YT0 | DE | S-adenosylmethionine decarboxylase beta chain;                                                                                                                                                                                       |
| N | A1W YT0 | DE | S-adenosylmethionine decarboxylase proenzyme;                                                                                                                                                                                        |
| N | A1W YT0 | DR | adenosylmethionine decarboxylase activity                                                                                                                                                                                            |
| N | A1W YT0 | DR | spermidine biosynthetic process                                                                                                                                                                                                      |
| N | A1W ZT3 | CC | Produces ATP from ADP in the presence of a proton gradient across the membrane                                                                                                                                                       |
| N | A1W ZT3 | CC | The alpha chain is a regulatory subunit (By similarity).                                                                                                                                                                             |
| N | A1W ZT3 | DE | ATP synthase F1 sector subunit alpha;                                                                                                                                                                                                |
| N | A1W ZT3 | DE | ATP synthase subunit alpha;                                                                                                                                                                                                          |
| N | A1W ZT3 | DE | F-ATPase subunit alpha;                                                                                                                                                                                                              |
| N | A1W ZT3 | DR | ATP hydrolysis coupled proton transport                                                                                                                                                                                              |
| N | A1W ZT3 | DR | ATP synthesis coupled proton transport                                                                                                                                                                                               |
| N | A1W ZT3 | DR | hydrogen ion transporting ATP synthase activity, rotational mechanism                                                                                                                                                                |
| N | A1W ZT3 | DR | proton-transporting ATPase activity, rotational mechanism                                                                                                                                                                            |
| N | A1XFV1  | CC | One of the components of the core antenna complex of photosystem II                                                                                                                                                                  |
| N | A1XFV1  | CC | It binds chlorophyll and helps catalyze the primary light-induced photochemical processes of photosystem II (By similarity).                                                                                                         |
| N | A1XFV1  | DE | PSII 43 kDa protein;                                                                                                                                                                                                                 |
| N | A1XFV1  | DE | Photosystem II 44 kDa reaction center protein;                                                                                                                                                                                       |
| N | A1XFV1  | DE | Photosystem II CP43 chlorophyll apoprotein;                                                                                                                                                                                          |
| N | A1XFV1  | DE | Protein CP-43;                                                                                                                                                                                                                       |
| N | A1XFV1  | DR | chlorophyll binding                                                                                                                                                                                                                  |
| N | A1XFV1  | DR | electron transporter, transferring electrons within the cyclic electron transport pathway of photosynthesis activity                                                                                                                 |
| N | A1XFV1  | DR | photosynthetic electron transport in photosystem II                                                                                                                                                                                  |
| N | A1XFV1  | DR | protein-chromophore linkage                                                                                                                                                                                                          |
| N | A1YGR5  | CC | Transfer of galactose from UDP-galactose to an acceptor molecule (R).                                                                                                                                                                |
| N | A1YGR5  | DE | Galactosyltransferase;                                                                                                                                                                                                               |
| N | A1YGR5  | DE | N-acetyllactosaminide alpha-1,3-galactosyltransferase;                                                                                                                                                                               |
| N | A1YGR5  | DE | UDP-galactose:beta-D-galactosyl-1,4-N-acetyl-D-glucosaminide alpha-1,3-galactosyltransferase;                                                                                                                                        |
| N | A1YGR5  | DR | N-acetyllactosaminide 3-alpha-galactosyltransferase activity                                                                                                                                                                         |
| N | A1YGR5  | DR | carbohydrate metabolic process                                                                                                                                                                                                       |
| N | A1YGR5  | DR | metal ion binding                                                                                                                                                                                                                    |
| N | A1ZB42  | CC | Component of the Mediator complex, a coactivator involved in the regulated transcription of nearly all RNA polymerase II-dependent genes                                                                                             |
| N | A1ZB42  | CC | Mediator functions as a bridge to convey information from gene-specific regulatory proteins to the basal RNA polymerase II transcription machinery                                                                                   |

|   |        |    |                                                                                                                                                                                                                                                  |
|---|--------|----|--------------------------------------------------------------------------------------------------------------------------------------------------------------------------------------------------------------------------------------------------|
| N | A1ZB42 | CC | Mediator is recruited to promoters by direct interactions with regulatory proteins and serves as a scaffold for the assembly of a functional preinitiation complex with RNA polymerase II and the general transcription factors (By similarity). |
| N | A1ZB42 | DE | Mediator complex subunit 9;                                                                                                                                                                                                                      |
| N | A1ZB42 | DE | Mediator of RNA polymerase II transcription subunit 9;                                                                                                                                                                                           |
| N | A1ZB42 | DR | RNA polymerase II transcription mediator activity                                                                                                                                                                                                |
| N | A1ZB42 | DR | regulation of transcription from RNA polymerase II promoter                                                                                                                                                                                      |
| N | A1ZB42 | DR | transcription from RNA polymerase II promoter                                                                                                                                                                                                    |
| N | A2BGT0 | CC | May participate in the maintenance of mitochondrial morphology (By similarity).                                                                                                                                                                  |
| N | A2BGT0 | DE | Deubiquitinating enzyme 30;                                                                                                                                                                                                                      |
| N | A2BGT0 | DE | Ub-specific protease 30;                                                                                                                                                                                                                         |
| N | A2BGT0 | DE | Ubiquitin carboxyl-terminal hydrolase 30;                                                                                                                                                                                                        |
| N | A2BGT0 | DE | Ubiquitin thiolesterase 30;                                                                                                                                                                                                                      |
| N | A2BGT0 | DE | Ubiquitin-specific-processing protease 30;                                                                                                                                                                                                       |
| N | A2BGT0 | DR | cysteine-type peptidase activity                                                                                                                                                                                                                 |
| N | A2BGT0 | DR | ubiquitin thiolesterase activity                                                                                                                                                                                                                 |
| N | A2BGT0 | DR | ubiquitin-dependent protein catabolic process                                                                                                                                                                                                    |
| N | A2BN64 | CC | Binds directly to 23S rRNA                                                                                                                                                                                                                       |
| N | A2BN64 | CC | Probably involved in E site tRNA release (By similarity).                                                                                                                                                                                        |
| N | A2BN64 | DE | 50S ribosomal protein L1P;                                                                                                                                                                                                                       |
| N | A2BN64 | DR | RNA processing                                                                                                                                                                                                                                   |
| N | A2BN64 | DR | regulation of translation                                                                                                                                                                                                                        |
| N | A2BN64 | DR | structural constituent of ribosome                                                                                                                                                                                                               |
| N | A2BQY1 | DE | Anthranilate phosphoribosyltransferase;                                                                                                                                                                                                          |
| N | A2BQY1 | DR | anthranilate phosphoribosyltransferase activity                                                                                                                                                                                                  |
| N | A2BQY1 | DR | tryptophan biosynthetic process                                                                                                                                                                                                                  |
| N | A2BSP9 | CC | Catalyzes the transfer of an acyl group from acyl- phosphate (acyl-PO(4)) to glycerol-3-phosphate (G3P) to form lysophosphatidic acid (LPA)                                                                                                      |
| N | A2BSP9 | CC | This enzyme utilizes acyl-phosphate as fatty acyl donor, but not acyl-CoA or acyl-ACP (By similarity).                                                                                                                                           |
| N | A2BSP9 | DE | Acyl-PO4 G3P acyltransferase;                                                                                                                                                                                                                    |
| N | A2BSP9 | DE | Acyl-phosphate--glycerol-3-phosphate acyltransferase;                                                                                                                                                                                            |
| N | A2BSP9 | DE | G3P acyltransferase;                                                                                                                                                                                                                             |
| N | A2BSP9 | DE | Glycerol-3-phosphate acyltransferase;                                                                                                                                                                                                            |
| N | A2BSP9 | DE | LPA synthase;                                                                                                                                                                                                                                    |
| N | A2BSP9 | DE | Lysophosphatidic acid synthase;                                                                                                                                                                                                                  |
| N | A2BSP9 | DR | phospholipid biosynthetic process                                                                                                                                                                                                                |
| N | A2BSP9 | DR | transferase activity, transferring acyl groups other than amino-acyl groups                                                                                                                                                                      |
| N | A2BV61 | CC | Catalyzes the transfer of endogenously produced octanoic acid from octanoyl-acyl-carrier-protein onto the lipoyl domains of lipoate-dependent enzymes                                                                                            |
| N | A2BV61 | CC | Lipoyl-ACP can also act as a substrate although octanoyl-ACP is likely to be the physiological substrate (By similarity).                                                                                                                        |
| N | A2BV61 | DE | Lipoate-protein ligase B;                                                                                                                                                                                                                        |
| N | A2BV61 | DE | Lipoyl/octanoyl transferase;                                                                                                                                                                                                                     |
| N | A2BV61 | DE | Octanoyl-[acyl-carrier-protein]-protein N-octanoyltransferase;                                                                                                                                                                                   |
| N | A2BV61 | DE | Octanoyltransferase;                                                                                                                                                                                                                             |
| N | A2BV61 | DR | lipoate biosynthetic process                                                                                                                                                                                                                     |
| N | A2BV61 | DR | lipoyl(octanoyl) transferase activity                                                                                                                                                                                                            |
| N | A2BV61 | DR | octanoyltransferase activity                                                                                                                                                                                                                     |
| N | A2BV61 | DR | protein modification process                                                                                                                                                                                                                     |
| N | A2BV78 | DE | Malate dehydrogenase [quinone];                                                                                                                                                                                                                  |
| N | A2BV78 | DE | Probable malate:quinone oxidoreductase;                                                                                                                                                                                                          |
| N | A2BV78 | DR | malate dehydrogenase (menaquinone) activity                                                                                                                                                                                                      |
| N | A2BV78 | DR | malate dehydrogenase (quinone) activity                                                                                                                                                                                                          |
| N | A2BV78 | DR | tricarboxylic acid cycle                                                                                                                                                                                                                         |
| N | A2BWM0 | DE | N-acetyl-gamma-glutamyl-phosphate reductase;                                                                                                                                                                                                     |
| N | A2BWM0 | DE | N-acetyl-glutamate semialdehyde dehydrogenase;                                                                                                                                                                                                   |
| N | A2BWM0 | DE | NAGSA dehydrogenase;                                                                                                                                                                                                                             |
| N | A2BWM0 | DR | N-acetyl-gamma-glutamyl-phosphate reductase activity                                                                                                                                                                                             |
| N | A2BWM0 | DR | arginine biosynthetic process                                                                                                                                                                                                                    |
| N | A2BWM0 | DR | oxidation-reduction process                                                                                                                                                                                                                      |
| N | A2BWM0 | DR | protein dimerization activity                                                                                                                                                                                                                    |
| N | A2C4J7 | CC | F(1)F(0) ATP synthase produces ATP from ADP in the presence of a proton or sodium gradient                                                                                                                                                       |

|   |        |    |                                                                                                                                                                                                                                             |
|---|--------|----|---------------------------------------------------------------------------------------------------------------------------------------------------------------------------------------------------------------------------------------------|
| N | A2C4J7 | CC | During catalysis, ATP synthesis in the catalytic domain of F(1) is coupled via a rotary mechanism of the central stalk subunits to proton translocation (By similarity).                                                                    |
| N | A2C4J7 | CC | F-type ATPases consist of two structural domains, F(1) containing the extramembraneous catalytic core and F(0) containing the membrane proton channel, linked together by a central stalk and a peripheral stalk                            |
| N | A2C4J7 | DE | ATP synthase F(0) sector subunit b;                                                                                                                                                                                                         |
| N | A2C4J7 | DE | ATP synthase subunit b;                                                                                                                                                                                                                     |
| N | A2C4J7 | DE | ATPase subunit I;                                                                                                                                                                                                                           |
| N | A2C4J7 | DE | F-ATPase subunit b;                                                                                                                                                                                                                         |
| N | A2C4J7 | DE | F-type ATPase subunit b;                                                                                                                                                                                                                    |
| N | A2C4J7 | DR | ATP synthesis coupled proton transport                                                                                                                                                                                                      |
| N | A2C4J7 | DR | hydrogen ion transmembrane transporter activity                                                                                                                                                                                             |
| N | A2C4M0 | CC | Specifically methylates the 197 position of a guanosine in 16S rRNA (By similarity).                                                                                                                                                        |
| N | A2C4M0 | DE | 16S rRNA 7-methylguanosine methyltransferase;                                                                                                                                                                                               |
| N | A2C4M0 | DE | 16S rRNA m7G methyltransferase;                                                                                                                                                                                                             |
| N | A2C4M0 | DE | Ribosomal RNA small subunit methyltransferase G;                                                                                                                                                                                            |
| N | A2C4M0 | DR | rRNA methyltransferase activity                                                                                                                                                                                                             |
| N | A2CBT5 | DE | Photosystem II reaction center protein M;                                                                                                                                                                                                   |
| N | A2CBT5 | DR | photosynthesis, light reaction                                                                                                                                                                                                              |
| N | A2CC86 | CC | Catalyzes the GTP-dependent ribosomal translocation step during translation elongation                                                                                                                                                      |
| N | A2CC86 | CC | Catalyzes the coordinated movement of the two tRNA molecules, the mRNA and conformational changes in the ribosome (By similarity).                                                                                                          |
| N | A2CC86 | CC | During this step, the ribosome changes from the pre-translocational (PRE) to the post- translocational (POST) state as the newly formed A-site-bound peptidyl-tRNA and P-site-bound deacylated tRNA move to the P and E sites, respectively |
| N | A2CC86 | DE | Elongation factor G;                                                                                                                                                                                                                        |
| N | A2CC86 | DR | GTPase activity                                                                                                                                                                                                                             |
| N | A2CC86 | DR | translation elongation factor activity                                                                                                                                                                                                      |
| N | A2CI35 | CC | May induce both caspase-dependent apoptosis and caspase- independent cell death (By similarity).                                                                                                                                            |
| N | A2CI35 | DE | Dual serine/threonine and tyrosine protein kinase;                                                                                                                                                                                          |
| N | A2CI35 | DE | Dusty protein kinase;                                                                                                                                                                                                                       |
| N | A2CI35 | DE | Receptor-interacting serine/threonine-protein kinase 5;                                                                                                                                                                                     |
| N | A2CI35 | DR | protein phosphorylation                                                                                                                                                                                                                     |
| N | A2CI35 | DR | protein serine/threonine kinase activity                                                                                                                                                                                                    |
| N | A2CI35 | DR | protein tyrosine kinase activity                                                                                                                                                                                                            |
| N | A2ICR5 | CC | Crystallins are the dominant structural components of the vertebrate eye lens (By similarity).                                                                                                                                              |
| N | A2ICR5 | DE | Beta-A4 crystallin;                                                                                                                                                                                                                         |
| N | A2ICR5 | DE | Beta-crystallin A4;                                                                                                                                                                                                                         |
| N | A2ICR5 | DR | structural constituent of eye lens                                                                                                                                                                                                          |
| N | A2QUJ2 | CC | Catalytic subunit of the slx1-slx4 structure-specific endonuclease that resolves DNA secondary structures generated during DNA repair and recombination                                                                                     |
| N | A2QUJ2 | CC | Has endonuclease activity towards branched DNA substrates, introducing single-strand cuts in duplex DNA close to junctions with ss-DNA (By similarity).                                                                                     |
| N | A2QUJ2 | DE | Structure-specific endonuclease subunit slx1;                                                                                                                                                                                               |
| N | A2QUJ2 | DR | DNA recombination                                                                                                                                                                                                                           |
| N | A2QUJ2 | DR | endonuclease activity                                                                                                                                                                                                                       |
| N | A2QUJ2 | DR | metal ion binding                                                                                                                                                                                                                           |
| N | A2QWA6 | CC | Involved in cytoplasm to vacuole transport (Cvt)                                                                                                                                                                                            |
| N | A2QWA6 | CC | Probably involved in the switching machinery regulating the conversion between the Cvt pathway and autophagy (By similarity).                                                                                                               |
| N | A2QWA6 | DE | Autophagy-related protein 13;                                                                                                                                                                                                               |
| N | A2QWA6 | DR | protein transport                                                                                                                                                                                                                           |
| N | A2RC52 | CC | DNA-dependent RNA polymerase catalyzes the transcription of DNA into RNA using the four ribonucleoside triphosphates as substrates.                                                                                                         |
| N | A2RC52 | DE | DNA-directed RNA polymerase subunit beta';                                                                                                                                                                                                  |
| N | A2RC52 | DE | RNA polymerase subunit beta';                                                                                                                                                                                                               |
| N | A2RC52 | DE | RNAP subunit beta';                                                                                                                                                                                                                         |
| N | A2RC52 | DE | Transcriptase subunit beta';                                                                                                                                                                                                                |
| N | A2RC52 | DR | DNA-directed RNA polymerase activity                                                                                                                                                                                                        |
| N | A2RIV7 | CC | Zinc phosphodiesterase, which displays some tRNA 5'- processing endonuclease activity.                                                                                                                                                      |
| N | A2RIV7 | CC | Probably involved in tRNA maturation, by removing a 3'-trailer from precursor tRNA (By similarity).                                                                                                                                         |
| N | A2RIV7 | DE | Ribonuclease Z;                                                                                                                                                                                                                             |

|   |        |    |                                                                                                                                                                                                   |
|---|--------|----|---------------------------------------------------------------------------------------------------------------------------------------------------------------------------------------------------|
| N | A2RIV7 | DE | tRNA 3' endonuclease;                                                                                                                                                                             |
| N | A2RIV7 | DR | endoribonuclease activity, producing 5'-phosphomonoesters                                                                                                                                         |
| N | A2RIV7 | DR | metal ion binding                                                                                                                                                                                 |
| N | A2RIV7 | DR | tRNA 3'-trailer cleavage                                                                                                                                                                          |
| N | A2RKP9 | CC | Site-specific tyrosine recombinase, which acts by catalyzing the cutting and rejoining of the recombining DNA molecules                                                                           |
| N | A2RKP9 | CC | Essential to convert dimers of the bacterial chromosome into monomers to permit their segregation at cell division (By similarity).                                                               |
| N | A2RKP9 | DE | Tyrosine recombinase xerS;                                                                                                                                                                        |
| N | A2RKP9 | DR | DNA integration                                                                                                                                                                                   |
| N | A2RKP9 | DR | DNA recombination                                                                                                                                                                                 |
| N | A2RKP9 | DR | cell division                                                                                                                                                                                     |
| N | A2RKP9 | DR | chromosome segregation                                                                                                                                                                            |
| N | A2S3E6 | CC | Probable reductase (By similarity).                                                                                                                                                               |
| N | A2S3E6 | DE | Putative reductase BMA10229_A0467;                                                                                                                                                                |
| N | A2S3E6 | DR | oxidation-reduction process                                                                                                                                                                       |
| N | A2S3E6 | DR | oxidoreductase activity                                                                                                                                                                           |
| N | A2S8D3 | DE | 50S ribosomal protein L34;                                                                                                                                                                        |
| N | A2S8D3 | DR | structural constituent of ribosome                                                                                                                                                                |
| N | A2SFW9 | DE | Fd-NADP+ reductase;                                                                                                                                                                               |
| N | A2SFW9 | DE | Ferredoxin--NADP reductase;                                                                                                                                                                       |
| N | A2SFW9 | DR | ferredoxin-NADP+ reductase activity                                                                                                                                                               |
| N | A2SFW9 | DR | oxidation-reduction process                                                                                                                                                                       |
| N | A2SJJ7 | CC | RuBisCO catalyzes two reactions: the carboxylation of D- ribulose 1,5-bisphosphate, the primary event in carbon dioxide fixation, as well as the oxidative fragmentation of the pentose substrate |
| N | A2SJJ7 | CC | Both reactions occur simultaneously and in competition at the same active site (By similarity).                                                                                                   |
| N | A2SJJ7 | DE | Ribulose biphosphate carboxylase large chain 2;                                                                                                                                                   |
| N | A2SJJ7 | DE | RuBisCO large subunit 2;                                                                                                                                                                          |
| N | A2SJJ7 | DR | magnesium ion binding                                                                                                                                                                             |
| N | A2SJJ7 | DR | monooxygenase activity                                                                                                                                                                            |
| N | A2SJJ7 | DR | oxidation-reduction process                                                                                                                                                                       |
| N | A2SJJ7 | DR | reductive pentose-phosphate cycle                                                                                                                                                                 |
| N | A2SJJ7 | DR | ribulose-bisphosphate carboxylase activity                                                                                                                                                        |
| N | A2SPM2 | CC | With S4 and S12 plays an important role in translational accuracy (By similarity)                                                                                                                 |
| N | A2SPM2 | DE | 30S ribosomal protein S5P;                                                                                                                                                                        |
| N | A2SPM2 | DR | structural constituent of ribosome                                                                                                                                                                |
| N | A2SQM4 | CC | Specifically catalyzes the AdoMet-dependent 2'-O-ribose methylation of cytidine at position 56 in tRNAs (By similarity).                                                                          |
| N | A2SQM4 | DE | tRNA ribose 2'-O-methyltransferase aTrm56;                                                                                                                                                        |
| N | A2SQM4 | DR | tRNA methyltransferase activity                                                                                                                                                                   |
| N | A2SQM4 | DR | tRNA nucleoside ribose methylation                                                                                                                                                                |
| N | A2SR38 | CC | DNA ligase that seals nicks in double-stranded DNA during DNA replication, DNA recombination and DNA repair (By similarity).                                                                      |
| N | A2SR38 | DE | Polydeoxyribonucleotide synthase [ATP];                                                                                                                                                           |
| N | A2SR38 | DR | DNA ligase (ATP) activity                                                                                                                                                                         |
| N | A2SR38 | DR | DNA recombination                                                                                                                                                                                 |
| N | A2SR38 | DR | DNA replication                                                                                                                                                                                   |
| N | A2SR38 | DR | cell division                                                                                                                                                                                     |
| N | A2SR38 | DR | metal ion binding                                                                                                                                                                                 |
| N | A2SST4 | CC | Produces ATP from ADP in the presence of a proton gradient across the membrane                                                                                                                    |
| N | A2SST4 | DE | V-type ATP synthase subunit F;                                                                                                                                                                    |
| N | A2SST4 | DE | V-type ATPase subunit F;                                                                                                                                                                          |
| N | A2SST4 | DR | ATP biosynthetic process                                                                                                                                                                          |
| N | A2SST4 | DR | ATP hydrolysis coupled proton transport                                                                                                                                                           |
| N | A2SST4 | DR | hydrogen ion transporting ATP synthase activity, rotational mechanism                                                                                                                             |
| N | A2SST4 | DR | proton-transporting ATPase activity, rotational mechanism                                                                                                                                         |
| N | A2ST72 | DE | UPF0147 protein Mlab_1361;                                                                                                                                                                        |
| N | A2SU54 | CC | Possesses two activities: a DNA synthesis (polymerase) and an exonucleolytic activity that degrades single stranded DNA in the 3'- to 5'-direction                                                |
| N | A2SU54 | CC | Has a template-primer preference which is characteristic of a replicative DNA polymerase (By similarity).                                                                                         |
| N | A2SU54 | DE | DNA polymerase II large subunit;                                                                                                                                                                  |
| N | A2SU54 | DR | DNA catabolic process                                                                                                                                                                             |

|   |        |    |                                                                                                                                                                                                                  |
|---|--------|----|------------------------------------------------------------------------------------------------------------------------------------------------------------------------------------------------------------------|
| N | A2SU54 | DR | DNA replication                                                                                                                                                                                                  |
| N | A2SU54 | DR | DNA-directed DNA polymerase activity                                                                                                                                                                             |
| N | A2SU54 | DR | exonuclease activity                                                                                                                                                                                             |
| N | A2T318 | CC | F(1)F(0) ATP synthase produces ATP from ADP in the presence of a proton or sodium gradient                                                                                                                       |
| N | A2T318 | CC | During catalysis, ATP synthesis in the catalytic domain of F(1) is coupled via a rotary mechanism of the central stalk subunits to proton translocation (By similarity)                                          |
| N | A2T318 | CC | F-type ATPases consist of two structural domains, F(1) containing the extramembraneous catalytic core and F(0) containing the membrane proton channel, linked together by a central stalk and a peripheral stalk |
| N | A2T318 | DE | ATP synthase F(0) sector subunit b;                                                                                                                                                                              |
| N | A2T318 | DE | ATP synthase subunit b, chloroplastic;                                                                                                                                                                           |
| N | A2T318 | DE | ATPase subunit I;                                                                                                                                                                                                |
| N | A2T318 | DR | ATP synthesis coupled proton transport                                                                                                                                                                           |
| N | A2T318 | DR | hydrogen ion transmembrane transporter activity                                                                                                                                                                  |
| N | A2T381 | DE | 50S ribosomal protein L32, chloroplastic;                                                                                                                                                                        |
| N | A2T381 | DR | structural constituent of ribosome                                                                                                                                                                               |
| N | A2VDC7 | CC | Endoribonuclease which preferentially cleaves ApU and ApG phosphodiester bonds (By similarity).                                                                                                                  |
| N | A2VDC7 | DE | RNase kappa-A;                                                                                                                                                                                                   |
| N | A2VDC7 | DE | Ribonuclease kappa-A;                                                                                                                                                                                            |
| N | A2VDC7 | DR | endoribonuclease activity                                                                                                                                                                                        |
| N | A2VDC7 | DR | rRNA transcription                                                                                                                                                                                               |
| N | A2XX73 | CC | Catalyzes the post-translational methylation of isoprenylated C-terminal cysteine residues (By similarity).                                                                                                      |
| N | A2XX73 | DE | Isoprenylcysteine carboxylmethyltransferase;                                                                                                                                                                     |
| N | A2XX73 | DE | Prenylated protein carboxyl methyltransferase;                                                                                                                                                                   |
| N | A2XX73 | DE | Prenylcysteine carboxyl methyltransferase;                                                                                                                                                                       |
| N | A2XX73 | DE | Probable protein-S-isoprenylcysteine O-methyltransferase;                                                                                                                                                        |
| N | A2XX73 | DR | protein C-terminal S-isoprenylcysteine carboxyl O-methyltransferase activity                                                                                                                                     |
| N | A2XXY8 | CC | Arginine methyltransferase that can both catalyze the formation of omega-N monomethylarginine (MMA) and asymmetrical dimethylarginine (aDMA) (By similarity)                                                     |
| N | A2XXY8 | DE | Probable protein arginine N-methyltransferase 6.1;                                                                                                                                                               |
| N | A2XXY8 | DR | protein methyltransferase activity                                                                                                                                                                               |
| N | A2YFN7 | CC | magnesium transporter that may mediate the influx of magnesium (By similarity)                                                                                                                                   |
| N | A2YFN7 | DE | Magnesium transporter MRS2-B;                                                                                                                                                                                    |
| N | A2YFN7 | DR | metal ion transmembrane transporter activity                                                                                                                                                                     |
| N | A3C6D7 | CC | Actins are highly conserved proteins that are involved in various types of cell motility and are ubiquitously expressed in all eukaryotic cells.                                                                 |
| N | A3CK64 | CC | One of the primary rRNA binding proteins, this protein initially binds near the 5'-end of the 23S rRNA                                                                                                           |
| N | A3CK64 | CC | It is important during the early stages of 50S assembly                                                                                                                                                          |
| N | A3CK64 | CC | It makes multiple contacts with different domains of the 23S rRNA in the assembled 50S subunit and ribosome (By similarity).                                                                                     |
| N | A3CK64 | DE | 50S ribosomal protein L4;                                                                                                                                                                                        |
| N | A3CK64 | DR | structural constituent of ribosome                                                                                                                                                                               |
| N | A3CLP4 | CC | Catalyzes the attachment of isoleucine to tRNA(Ile)                                                                                                                                                              |
| N | A3CLP4 | CC | As IleRS can inadvertently accommodate and process structurally similar amino acids such as valine, to avoid such errors it has two additional distinct tRNA(Ile)-dependent editing activities                   |
| N | A3CLP4 | CC | One activity is designated as 'pretransfer' editing and involves the hydrolysis of activated Val-AMP                                                                                                             |
| N | A3CLP4 | CC | The other activity is designated 'posttransfer' editing and involves deacylation of mischarged Val-tRNA(Ile) (By similarity).                                                                                    |
| N | A3CLP4 | DE | Isoleucine--tRNA ligase;                                                                                                                                                                                         |
| N | A3CLP4 | DE | Isoleucyl-tRNA synthetase;                                                                                                                                                                                       |
| N | A3CLP4 | DR | isoleucine-tRNA ligase activity                                                                                                                                                                                  |
| N | A3CLP4 | DR | isoleucyl-tRNA aminoacylation                                                                                                                                                                                    |
| N | A3CLP4 | DR | metal ion binding                                                                                                                                                                                                |
| N | A3CM38 | CC | May be required for sporulation (By similarity).                                                                                                                                                                 |
| N | A3CM38 | DE | Putative sporulation transcription regulator whiA;                                                                                                                                                               |
| N | A3CPH6 | DE | Galactose-6-phosphate isomerase subunit lacB;                                                                                                                                                                    |
| N | A3CPH6 | DR | galactose-6-phosphate isomerase activity                                                                                                                                                                         |
| N | A3CPH6 | DR | lactose catabolic process                                                                                                                                                                                        |
| N | A3CPV8 | CC | Modulates recA activity (By similarity).                                                                                                                                                                         |

|   |        |    |                                                                                                                                                 |
|---|--------|----|-------------------------------------------------------------------------------------------------------------------------------------------------|
| N | A3CPV8 | DE | Regulatory protein recX;                                                                                                                        |
| N | A3CPV8 | DR | regulation of DNA repair                                                                                                                        |
| N | A3CTR4 | CC | Part of the RFC clamp loader complex which loads the PCNA sliding clamp onto DNA (By similarity).                                               |
| N | A3CTR4 | DE | Clamp loader large subunit;                                                                                                                     |
| N | A3CTR4 | DE | RFC large subunit;                                                                                                                              |
| N | A3CTR4 | DE | Replication factor C large subunit;                                                                                                             |
| N | A3CTR4 | DR | DNA replication                                                                                                                                 |
| N | A3CTR4 | DR | nucleoside-triphosphatase activity                                                                                                              |
| N | A3D289 | DE | ADP-glucose pyrophosphorylase;                                                                                                                  |
| N | A3D289 | DE | ADP-glucose synthase;                                                                                                                           |
| N | A3D289 | DE | ADPGlc PPase;                                                                                                                                   |
| N | A3D289 | DE | Glucose-1-phosphate adenyltransferase;                                                                                                          |
| N | A3D289 | DR | glucose-1-phosphate adenyltransferase activity                                                                                                  |
| N | A3D289 | DR | glycogen biosynthetic process                                                                                                                   |
| N | A3DE29 | CC | First step of the lipid cycle reactions in the biosynthesis of the cell wall peptidoglycan (By similarity).                                     |
| N | A3DE29 | DE | Phospho-N-acetylmuramoyl-pentapeptide-transferase;                                                                                              |
| N | A3DE29 | DE | UDP-MurNAc-pentapeptide phosphotransferase;                                                                                                     |
| N | A3DE29 | DR | UDP-N-acetylmuramoyl-L-alanyl-D-glutamyl-meso-2,6-diaminopimelyl-D-alanyl-D-alanine:undecaprenyl-phosphate transferase activity                 |
| N | A3DE29 | DR | cell division                                                                                                                                   |
| N | A3DE29 | DR | cellular cell wall organization                                                                                                                 |
| N | A3DE29 | DR | peptidoglycan biosynthetic process                                                                                                              |
| N | A3DE29 | DR | phospho-N-acetylmuramoyl-pentapeptide-transferase activity                                                                                      |
| N | A3DE29 | DR | regulation of cell shape                                                                                                                        |
| N | A3DE59 | DE | 30S ribosomal protein S2;                                                                                                                       |
| N | A3DE59 | DR | structural constituent of ribosome                                                                                                              |
| N | A3DIF3 | DE | Glutamate-1-semialdehyde 2,1-aminomutase;                                                                                                       |
| N | A3DIF3 | DE | Glutamate-1-semialdehyde aminotransferase;                                                                                                      |
| N | A3DIF3 | DR | glutamate-1-semialdehyde 2,1-aminomutase activity                                                                                               |
| N | A3DIF3 | DR | porphyrin biosynthetic process                                                                                                                  |
| N | A3DIF3 | DR | pyridoxal phosphate binding                                                                                                                     |
| N | A3DIF3 | DR | transaminase activity                                                                                                                           |
| N | A3DN28 | CC | Catalyzes the NAD(P)H-dependent reduction of dihydroxyacetonephosphate (DHAP or glyceraldehyde 3-phosphate) to glyceraldehyde 3-phosphate (GAP) |
| N | A3DN28 | CC | The GAP thus generated is used as the glycerophosphate backbone of phospholipids in the cellular membranes of Archaea (By similarity).          |
| N | A3DN28 | DE | Enantiomeric glycerophosphate synthase;                                                                                                         |
| N | A3DN28 | DE | GAP dehydrogenase;                                                                                                                              |
| N | A3DN28 | DE | Glycerol-1-phosphate dehydrogenase [NAD(P)+];                                                                                                   |
| N | A3DN28 | DE | sn-glycerol-1-phosphate dehydrogenase;                                                                                                          |
| N | A3DN28 | DR | glycerol-1-phosphate dehydrogenase [NAD(P)+] activity                                                                                           |
| N | A3DN28 | DR | metal ion binding                                                                                                                               |
| N | A3DN28 | DR | oxidation-reduction process                                                                                                                     |
| N | A3DN28 | DR | phospholipid biosynthetic process                                                                                                               |
| N | A3EX94 | CC | S1 region attaches the virion to the cell membrane by interacting with cell receptors, initiating the infection (By similarity).                |
| N | A3EX94 | DE | Peplomer protein;                                                                                                                               |
| N | A3EX94 | DE | S glycoprotein;                                                                                                                                 |
| N | A3EX94 | DE | Spike glycoprotein;                                                                                                                             |
| N | A3EX94 | DE | Spike protein S1;                                                                                                                               |
| N | A3EX94 | DE | Spike protein S2;                                                                                                                               |
| N | A3EX94 | DR | cellular membrane fusion                                                                                                                        |
| N | A3EX94 | DR | viral envelope fusion with host membrane                                                                                                        |
| N | A3EX94 | DR | virion attachment, binding of host cell surface receptor                                                                                        |
| N | A3FPG8 | CC | Esterifies acyl-group from acyl-ACP to the sn-1 position of glycerol-3-phosphate, an essential step in glycerolipid biosynthesis                |
| N | A3FPG8 | CC | Active against both saturated and unsaturated long-chain fatty acyl-CoAs (By similarity).                                                       |
| N | A3FPG8 | DE | 1-AGP acyltransferase 6;                                                                                                                        |
| N | A3FPG8 | DE | 1-acylglycerol-3-phosphate O-acyltransferase 6;                                                                                                 |
| N | A3FPG8 | DE | Acyl-CoA:glycerol-3-phosphate acyltransferase 4;                                                                                                |
| N | A3FPG8 | DE | Glycerol-3-phosphate acyltransferase 4;                                                                                                         |
| N | A3FPG8 | DE | LPAAT-zeta;                                                                                                                                     |



|   |        |    |                                                                                                                                                                                                                                                                                                                                                                   |
|---|--------|----|-------------------------------------------------------------------------------------------------------------------------------------------------------------------------------------------------------------------------------------------------------------------------------------------------------------------------------------------------------------------|
| N | A3FPG8 | DE | Lysophosphatidic acid acyltransferase zeta;                                                                                                                                                                                                                                                                                                                       |
| N | A3FPG8 | DR | glycerol-3-phosphate O-acyltransferase activity                                                                                                                                                                                                                                                                                                                   |
| N | A3LZZ0 | CC | Core component of nucleosome which plays a central role in DNA double strand break (DSB) repair                                                                                                                                                                                                                                                                   |
| N | A3LZZ0 | CC | DNA accessibility is regulated via a complex set of post-translational modifications of histones, also called histone code, and nucleosome remodeling.                                                                                                                                                                                                            |
| N | A3LZZ0 | CC | Histones thereby play a central role in transcription regulation, DNA repair, DNA replication and chromosomal stability                                                                                                                                                                                                                                           |
| N | A3LZZ0 | CC | Nucleosomes wrap and compact DNA into chromatin, limiting DNA accessibility to the cellular machineries which require DNA as a template                                                                                                                                                                                                                           |
| N | A3LZZ0 | DE | Histone H2A.1;                                                                                                                                                                                                                                                                                                                                                    |
| N | A3LZZ0 | DR | nucleosome assembly                                                                                                                                                                                                                                                                                                                                               |
| N | A3M2T7 | CC | Catalyzes the phosphorylation of pantothenate (Pan), the first step in CoA biosynthesis (By similarity).                                                                                                                                                                                                                                                          |
| N | A3M2T7 | DE | Pantothenic acid kinase;                                                                                                                                                                                                                                                                                                                                          |
| N | A3M2T7 | DE | Type III pantothenate kinase;                                                                                                                                                                                                                                                                                                                                     |
| N | A3M2T7 | DR | coenzyme A biosynthetic process                                                                                                                                                                                                                                                                                                                                   |
| N | A3M2T7 | DR | pantothenate kinase activity                                                                                                                                                                                                                                                                                                                                      |
| N | A3M2T7 | DR | transcription activator activity                                                                                                                                                                                                                                                                                                                                  |
| N | A3MA34 | CC | Riboflavin synthase is a bifunctional enzyme complex catalyzing the formation of riboflavin from 5-amino-6-(1'-D)- ribityl-amino-2,4(1H,3H)-pyrimidinedione and L-3,4-dihydroxy-2- butanone-4-phosphate via 6,7-dimethyl-8-lumazine                                                                                                                               |
| N | A3MA34 | CC | The beta subunit catalyzes the condensation of 5-amino-6-(1'-D)-ribityl-amino-2,4(1H,3H)-pyrimidinedione with L-3,4-dihydroxy-2-butanone-4- phosphate yielding 6,7-dimethyl-8-lumazine (By similarity).                                                                                                                                                           |
| N | A3MA34 | DE | 6,7-dimethyl-8-ribityllumazine synthase;                                                                                                                                                                                                                                                                                                                          |
| N | A3MA34 | DE | DMRL synthase;                                                                                                                                                                                                                                                                                                                                                    |
| N | A3MA34 | DE | Lumazine synthase;                                                                                                                                                                                                                                                                                                                                                |
| N | A3MA34 | DE | Riboflavin synthase beta chain;                                                                                                                                                                                                                                                                                                                                   |
| N | A3MA34 | DR | riboflavin biosynthetic process                                                                                                                                                                                                                                                                                                                                   |
| N | A3MA34 | DR | riboflavin synthase activity                                                                                                                                                                                                                                                                                                                                      |
| N | A3MNG2 | DE | DTB synthetase;                                                                                                                                                                                                                                                                                                                                                   |
| N | A3MNG2 | DE | Dethiobiotin synthase;                                                                                                                                                                                                                                                                                                                                            |
| N | A3MNG2 | DE | Dethiobiotin synthetase;                                                                                                                                                                                                                                                                                                                                          |
| N | A3MNG2 | DR | biotin biosynthetic process                                                                                                                                                                                                                                                                                                                                       |
| N | A3MNG2 | DR | dethiobiotin synthase activity                                                                                                                                                                                                                                                                                                                                    |
| N | A3MNG2 | DR | magnesium ion binding                                                                                                                                                                                                                                                                                                                                             |
| N | A3MQB6 | CC | Catalyzes the phosphorylation of the position 2 hydroxy group of 4-diphosphocytidyl-2C-methyl-D-erythritol (By similarity).                                                                                                                                                                                                                                       |
| N | A3MQB6 | DE | 4-(cytidine-5'-diphospho)-2-C-methyl-D-erythritol kinase;                                                                                                                                                                                                                                                                                                         |
| N | A3MQB6 | DE | 4-diphosphocytidyl-2-C-methyl-D-erythritol kinase;                                                                                                                                                                                                                                                                                                                |
| N | A3MQB6 | DR | 4-(cytidine 5'-diphospho)-2-C-methyl-D-erythritol kinase activity                                                                                                                                                                                                                                                                                                 |
| N | A3MQB6 | DR | terpenoid biosynthetic process                                                                                                                                                                                                                                                                                                                                    |
| N | A3MRF1 | CC | Catalyzes the reaction of cyanate with bicarbonate to produce ammonia and carbon dioxide (By similarity).                                                                                                                                                                                                                                                         |
| N | A3MRF1 | DE | Cyanate hydratase;                                                                                                                                                                                                                                                                                                                                                |
| N | A3MRF1 | DE | Cyanate hydrolase;                                                                                                                                                                                                                                                                                                                                                |
| N | A3MRF1 | DE | Cyanate lyase;                                                                                                                                                                                                                                                                                                                                                    |
| N | A3MRF1 | DR | cyanate hydratase activity                                                                                                                                                                                                                                                                                                                                        |
| N | A3MRF1 | DR | cyanate metabolic process                                                                                                                                                                                                                                                                                                                                         |
| N | A3MRF1 | DR | hydro-lyase activity                                                                                                                                                                                                                                                                                                                                              |
| N | A3MYB2 | CC | An essential GTPase which binds GTP, GDP and possibly (p)ppGpp with moderate affinity, with high nucleotide exchange rates and a fairly low GTP hydrolysis rate (By similarity)<br>it may play a role in control of the cell cycle, stress response, ribosome biogenesis and in those bacteria that undergo differentiation, in morphogenesis control (Potential) |
| N | A3MYB2 | DE | GTP-binding protein obg;                                                                                                                                                                                                                                                                                                                                          |
| N | A3MYB2 | DR | GTPase activity                                                                                                                                                                                                                                                                                                                                                   |
| N | A3MYB2 | DR | magnesium ion binding                                                                                                                                                                                                                                                                                                                                             |
| N | A3MYK2 | CC | May play a role in 30S ribosomal subunit biogenesis                                                                                                                                                                                                                                                                                                               |
| N | A3MYK2 | CC | Unusual circularly permuted GTPase that catalyzes rapid hydrolysis of GTP with a slow catalytic turnover (By similarity).                                                                                                                                                                                                                                         |
| N | A3MYK2 | DE | Putative ribosome biogenesis GTPase RsgA;                                                                                                                                                                                                                                                                                                                         |
| N | A3MYK2 | DR | GTPase activity                                                                                                                                                                                                                                                                                                                                                   |
| N | A3MYK2 | DR | metal ion binding                                                                                                                                                                                                                                                                                                                                                 |

|   |        |    |                                                                                                                                                                                                          |
|---|--------|----|----------------------------------------------------------------------------------------------------------------------------------------------------------------------------------------------------------|
| N | A3N186 | CC | Catalyzes the formation of S-adenosylmethionine from methionine and ATP                                                                                                                                  |
| N | A3N186 | CC | The overall synthetic reaction is composed of two sequential steps, AdoMet formation and the subsequent triphosphate hydrolysis which occurs prior to release of AdoMet from the enzyme (By similarity). |
| N | A3N186 | DE | AdoMet synthase;                                                                                                                                                                                         |
| N | A3N186 | DE | Methionine adenosyltransferase;                                                                                                                                                                          |
| N | A3N186 | DE | S-adenosylmethionine synthase;                                                                                                                                                                           |
| N | A3N186 | DR | metal ion binding                                                                                                                                                                                        |
| N | A3N186 | DR | methionine adenosyltransferase activity                                                                                                                                                                  |
| N | A3N186 | DR | one-carbon metabolic process                                                                                                                                                                             |
| N | A3N3T8 | DE | 50S ribosomal protein L27;                                                                                                                                                                               |
| N | A3N3T8 | DR | structural constituent of ribosome                                                                                                                                                                       |
| N | A3NC12 | CC | Oxidative deamination of D-amino acids (By similarity).                                                                                                                                                  |
| N | A3NC12 | DE | D-amino acid dehydrogenase small subunit;                                                                                                                                                                |
| N | A3NC12 | DR | D-amino-acid dehydrogenase activity                                                                                                                                                                      |
| N | A3NC12 | DR | oxidation-reduction process                                                                                                                                                                              |
| N | A3NCY6 | CC | Negatively regulates transcription of bacterial ribonucleotide reductase nrd genes and operons by binding to NrdR- boxes (By similarity).                                                                |
| N | A3NCY6 | DE | Transcriptional repressor NrdR;                                                                                                                                                                          |
| N | A3NCY6 | DR | transcription repressor activity                                                                                                                                                                         |
| N | A3NCY6 | DR | zinc ion binding                                                                                                                                                                                         |
| N | A3NPX0 | DE | UPF0161 protein BURPS1106A_0106;                                                                                                                                                                         |
| N | A3NQ45 | CC | Furnishes a means for formation of correctly charged Gln-tRNA(Gln) through the transamidation of misacylated Glu- tRNA(Gln) in organisms which lack glutamyl-tRNA synthetase                             |
| N | A3NQ45 | CC | The reaction takes place in the presence of glutamine and ATP through an activated gamma-phospho-Glu-tRNA(Gln) (By similarity).                                                                          |
| N | A3NQ45 | DE | Glu-ADT subunit A;                                                                                                                                                                                       |
| N | A3NQ45 | DE | Glutamyl-tRNA(Gln) amidotransferase subunit A;                                                                                                                                                           |
| N | A3NQ45 | DR | carbon-nitrogen ligase activity, with glutamine as amido-N-donor                                                                                                                                         |
| N | A3NQS3 | CC | Catalyzes the decarboxylative condensation of pimeloyl-CoA and L-alanine to produce 8-amino-7-oxononanoate (AON), coenzyme A, and carbon dioxide (By similarity)                                         |
| N | A3NQS3 | DE | 7-KAP synthase;                                                                                                                                                                                          |
| N | A3NQS3 | DE | 7-keto-8-amino-pelargonic acid synthase;                                                                                                                                                                 |
| N | A3NQS3 | DE | 8-amino-7-ketopelargonate synthase;                                                                                                                                                                      |
| N | A3NQS3 | DE | 8-amino-7-oxononanoate synthase;                                                                                                                                                                         |
| N | A3NQS3 | DE | KAPA synthase;                                                                                                                                                                                           |
| N | A3NQS3 | DE | L-alanine--pimeloyl-CoA ligase;                                                                                                                                                                          |
| N | A3NQS3 | DR | 8-amino-7-oxononanoate synthase activity                                                                                                                                                                 |
| N | A3NQS3 | DR | biotin biosynthetic process                                                                                                                                                                              |
| N | A3NQS3 | DR | pyridoxal phosphate binding                                                                                                                                                                              |
| N | A3NQS3 | DR | transferase activity, transferring nitrogenous groups                                                                                                                                                    |
| N | A3NS83 | CC | Binds directly to 16S ribosomal RNA (By similarity).                                                                                                                                                     |
| N | A3NS83 | DE | 30S ribosomal protein S20;                                                                                                                                                                               |
| N | A3NS83 | DR | structural constituent of ribosome                                                                                                                                                                       |
| N | A3NWL8 | CC | Involved in the biosynthesis of lipid A, a phosphorylated glycolipid that anchors the lipopolysaccharide to the outer membrane of the cell (By similarity).                                              |
| N | A3NWL8 | DE | Acyl-[acyl-carrier-protein]-UDP-N-acetylglucosamine O-acyltransferase;                                                                                                                                   |
| N | A3NWL8 | DE | UDP-N-acetylglucosamine acyltransferase;                                                                                                                                                                 |
| N | A3NWL8 | DR | acyl-[acyl-carrier-protein]-UDP-N-acetylglucosamine O-acyltransferase activity                                                                                                                           |
| N | A3NWL8 | DR | lipid A biosynthetic process                                                                                                                                                                             |
| N | A3NY89 | CC | Involved in the transcription termination process (By similarity).                                                                                                                                       |
| N | A3NY89 | DE | N utilization substance protein B homolog;                                                                                                                                                               |
| N | A3NY89 | DE | Protein nusB;                                                                                                                                                                                            |
| N | A3NY89 | DR | regulation of transcription, DNA-dependent                                                                                                                                                               |
| N | A3NY89 | DR | transcription termination factor activity                                                                                                                                                                |
| N | A3P0A1 | CC | This is 1 of the proteins that binds and probably mediates the attachment of the 5S RNA into the large ribosomal subunit, where it forms part of the central protuberance                                |
| N | A3P0A1 | CC | Contacts the P site tRNA; the 5S rRNA and some of its associated proteins might help stabilize positioning of ribosome-bound tRNAs (By similarity).                                                      |
| N | A3P0A1 | CC | In the 70S ribosome it contacts protein S13 of the 30S subunit (bridge B1b), connecting the 2 subunits; this bridge is implicated in subunit movement                                                    |
| N | A3P0A1 | DE | 50S ribosomal protein L5;                                                                                                                                                                                |
| N | A3P0A1 | DR | structural constituent of ribosome                                                                                                                                                                       |
| N | A3PA97 | CC | Major role in the synthesis of nucleoside triphosphates other than ATP                                                                                                                                   |

|   |        |    |                                                                                                                                              |
|---|--------|----|----------------------------------------------------------------------------------------------------------------------------------------------|
| N | A3PA97 | CC | The ATP gamma phosphate is transferred to the NDP beta phosphate via a ping-pong mechanism, using a phosphorylated active-site intermediate. |
| N | A3PA97 | DE | NDP kinase;                                                                                                                                  |
| N | A3PA97 | DE | Nucleoside diphosphate kinase;                                                                                                               |
| N | A3PA97 | DE | Nucleoside-2-P kinase;                                                                                                                       |
| N | A3PA97 | DR | CTP biosynthetic process                                                                                                                     |
| N | A3PA97 | DR | GTP biosynthetic process                                                                                                                     |
| N | A3PA97 | DR | UTP biosynthetic process                                                                                                                     |
| N | A3PA97 | DR | metal ion binding                                                                                                                            |
| N | A3PA97 | DR | nucleoside diphosphate kinase activity                                                                                                       |
| N | A3PDM1 | CC | Catalyzes the folate-dependent formation of 5-methyl- uridine at position 54 (M-5-U54) in all tRNAs (By similarity).                         |
| N | A3PDM1 | DE | Folate-dependent tRNA (uracil-5-)-methyltransferase;                                                                                         |
| N | A3PDM1 | DE | Folate-dependent tRNA(M-5-U54)-methyltransferase;                                                                                            |
| N | A3PDM1 | DE | Methylenetetrahydrofolate--tRNA-(uracil-5-)-methyltransferase TrmFO;                                                                         |
| N | A3PDM1 | DR | flavin adenine dinucleotide binding                                                                                                          |
| N | A3PDM1 | DR | methylenetetrahydrofolate-tRNA-(uracil-5-)-methyltransferase (FADH2-oxidizing) activity                                                      |
| N | A3PDM1 | DR | tRNA processing                                                                                                                              |
| N | A3PGM0 | CC | One of the primary rRNA binding proteins, it binds specifically to the 5'-end of 16S ribosomal RNA (By similarity).                          |
| N | A3PGM0 | DE | 30S ribosomal protein S17;                                                                                                                   |
| N | A3PGM0 | DR | structural constituent of ribosome                                                                                                           |
| N | A3PNB5 | DE | Acetylglutamate kinase;                                                                                                                      |
| N | A3PNB5 | DE | N-acetyl-L-glutamate 5-phosphotransferase;                                                                                                   |
| N | A3PNB5 | DR | acetylglutamate kinase activity                                                                                                              |
| N | A3PNB5 | DR | arginine biosynthetic process                                                                                                                |
| N | A3PNB5 | DR | glutamate 5-kinase activity                                                                                                                  |
| N | A3PNB5 | DR | proline biosynthetic process                                                                                                                 |
| N | A3PQJ2 | CC | Catalyzes the NADPH dependent reduction of L-gamma- glutamyl 5-phosphate into L-glutamate 5-semialdehyde and phosphate                       |
| N | A3PQJ2 | CC | The product spontaneously undergoes cyclization to form 1-pyrroline-3-carboxylate                                                            |
| N | A3PQJ2 | DE | GSA dehydrogenase;                                                                                                                           |
| N | A3PQJ2 | DE | Gamma-glutamyl phosphate reductase;                                                                                                          |
| N | A3PQJ2 | DE | Glutamate-5-semialdehyde dehydrogenase;                                                                                                      |
| N | A3PQJ2 | DE | Glutamyl-gamma-semialdehyde dehydrogenase;                                                                                                   |
| N | A3PQJ2 | DR | glutamate-5-semialdehyde dehydrogenase activity                                                                                              |
| N | A3PQJ2 | DR | oxidation-reduction process                                                                                                                  |
| N | A3PQJ2 | DR | proline biosynthetic process                                                                                                                 |
| N | A3PXU3 | DE | Acylphosphatase;                                                                                                                             |
| N | A3PXU3 | DE | Acylphosphate phosphohydrolase;                                                                                                              |
| N | A3PXU3 | DR | acylphosphatase activity                                                                                                                     |
| N | A3PXX6 | DE | UPF0102 protein Mjls_1965;                                                                                                                   |
| N | A3PXX6 | DR | nuclease activity                                                                                                                            |
| N | A3QC90 | CC | Could accelerate the degradation of some genes transcripts potentially through selective RNA binding (By similarity).                        |
| N | A3QC90 | DE | Carbon storage regulator homolog;                                                                                                            |
| N | A3QC90 | DR | mRNA catabolic process                                                                                                                       |
| N | A3QC90 | DR | regulation of carbohydrate metabolic process                                                                                                 |
| N | A3QCX7 | CC | Involved in the import of serine and threonine into the cell, with the concomitant import of sodium (symport system) (By similarity).        |
| N | A3QCX7 | DE | Na(+)/serine-threonine symporter;                                                                                                            |
| N | A3QCX7 | DE | Serine/threonine transporter sstT;                                                                                                           |
| N | A3QCX7 | DR | amino acid transport                                                                                                                         |
| N | A3QCX7 | DR | sodium:dicarboxylate symporter activity                                                                                                      |
| N | A3QDA2 | CC | Specifically methylates the cytosine at position 1407 (m5C1407) of 16S rRNA (By similarity).                                                 |
| N | A3QDA2 | DE | 16S rRNA m5C1407 methyltransferase;                                                                                                          |
| N | A3QDA2 | DE | Ribosomal RNA small subunit methyltransferase F;                                                                                             |
| N | A3QDA2 | DE | rRNA (cytosine-C(5)-)-methyltransferase rsmF;                                                                                                |
| N | A3QDA2 | DR | rRNA methyltransferase activity                                                                                                              |
| N | A3QEC1 | DE | CMP kinase;                                                                                                                                  |
| N | A3QEC1 | DE | Cytidine monophosphate kinase;                                                                                                               |
| N | A3QEC1 | DE | Cytidylate kinase;                                                                                                                           |
| N | A3QEC1 | DR | cytidylate kinase activity                                                                                                                   |

|   |        |    |                                                                                                                                                                                                                                                  |
|---|--------|----|--------------------------------------------------------------------------------------------------------------------------------------------------------------------------------------------------------------------------------------------------|
| N | A3QIQ6 | CC | Phosphorolytic exoribonuclease that removes nucleotide residues following the -CCA terminus of tRNA and adds nucleotides to the ends of RNA molecules by using nucleoside diphosphates as substrates (By similarity).                            |
| N | A3QIQ6 | DE | Ribonuclease PH;                                                                                                                                                                                                                                 |
| N | A3QIQ6 | DE | tRNA nucleotidyltransferase;                                                                                                                                                                                                                     |
| N | A3QIQ6 | DR | 3'-5'-exoribonuclease activity                                                                                                                                                                                                                   |
| N | A3QIQ6 | DR | tRNA nucleotidyltransferase activity                                                                                                                                                                                                             |
| N | A3QIQ6 | DR | tRNA processing                                                                                                                                                                                                                                  |
| N | A3QIQ6 | DR | tRNA-specific ribonuclease activity                                                                                                                                                                                                              |
| N | A3R064 | CC | DOK proteins are enzymatically inert adaptor or scaffolding proteins                                                                                                                                                                             |
| N | A3R064 | CC | Plays a role as negative regulator of the mobilization of calcium ions and of calcium signaling.                                                                                                                                                 |
| N | A3R064 | CC | They provide a docking platform for the assembly of multimolecular signaling complexes                                                                                                                                                           |
| N | A3R064 | DE | Docking protein 3;                                                                                                                                                                                                                               |
| N | A3R064 | DE | Downstream of tyrosine kinase 3;                                                                                                                                                                                                                 |
| N | A3R064 | DR | insulin receptor binding                                                                                                                                                                                                                         |
| N | A4D9J5 | CC | Component of the Mediator complex, a coactivator involved in the regulated transcription of nearly all RNA polymerase II-dependent genes                                                                                                         |
| N | A4D9J5 | CC | Mediator functions as a bridge to convey information from gene-specific regulatory proteins to the basal RNA polymerase II transcription machinery                                                                                               |
| N | A4D9J5 | CC | Mediator is recruited to promoters by direct interactions with regulatory proteins and serves as a scaffold for the assembly of a functional preinitiation complex with RNA polymerase II and the general transcription factors (By similarity). |
| N | A4D9J5 | DE | Mediator complex subunit 16;                                                                                                                                                                                                                     |
| N | A4D9J5 | DE | Mediator of RNA polymerase II transcription subunit 16;                                                                                                                                                                                          |
| N | A4F7F9 | CC | Facilitates the functional incorporation of the urease nickel metallocenter                                                                                                                                                                      |
| N | A4F7F9 | CC | This process requires GTP hydrolysis, probably effected by ureG (By similarity)                                                                                                                                                                  |
| N | A4F7F9 | DE | Urease accessory protein ureG 1;                                                                                                                                                                                                                 |
| N | A4F7F9 | DR | nickel ion binding                                                                                                                                                                                                                               |
| N | A4FAB4 | DE | Glutaminase;                                                                                                                                                                                                                                     |
| N | A4FAB4 | DR | glutaminase activity                                                                                                                                                                                                                             |
| N | A4FAB4 | DR | glutamine metabolic process                                                                                                                                                                                                                      |
| N | A4FBY0 | CC | Protein modifier that is covalently attached to lysine residues of substrate proteins, thereby targeting them for proteasomal degradation                                                                                                        |
| N | A4FBY0 | CC | The tagging system is termed pupylation (By similarity).                                                                                                                                                                                         |
| N | A4FBY0 | DE | Bacterial ubiquitin-like modifier 1;                                                                                                                                                                                                             |
| N | A4FBY0 | DE | Prokaryotic ubiquitin-like protein Pup 1;                                                                                                                                                                                                        |
| N | A4FBZ2 | CC | Required for correct localization of precursor proteins bearing signal peptides with the twin arginine conserved motif S/T-R-R-X-F-L-K                                                                                                           |
| N | A4FBZ2 | CC | This sec-independent pathway is termed TAT for twin-arginine translocation system                                                                                                                                                                |
| N | A4FBZ2 | CC | This system mainly transports proteins with bound cofactors that require folding prior to export (By similarity).                                                                                                                                |
| N | A4FBZ2 | DE | Sec-independent protein translocase protein tatA/E homolog;                                                                                                                                                                                      |
| N | A4FBZ2 | DR | protein secretion                                                                                                                                                                                                                                |
| N | A4FBZ2 | DR | protein transporter activity                                                                                                                                                                                                                     |
| N | A4FBZ2 | DR | transmembrane transport                                                                                                                                                                                                                          |
| N | A4FK76 | CC | Catalyzes the 1,5-allylic rearrangement of the homoallylic substrate isopentenyl (IPP) to its highly electrophilic allylic isomer, dimethylallyl diphosphate (DMA PP) (By similarity)                                                            |
| N | A4FK76 | DE | IPP isomerase;                                                                                                                                                                                                                                   |
| N | A4FK76 | DE | IPP:DMAPP isomerase;                                                                                                                                                                                                                             |
| N | A4FK76 | DE | Isopentenyl pyrophosphate isomerase;                                                                                                                                                                                                             |
| N | A4FK76 | DE | Isopentenyl-diphosphate Delta-isomerase;                                                                                                                                                                                                         |
| N | A4FK76 | DR | hydrolase activity                                                                                                                                                                                                                               |
| N | A4FK76 | DR | isopentenyl-diphosphate delta-isomerase activity                                                                                                                                                                                                 |
| N | A4FK76 | DR | isoprenoid biosynthetic process                                                                                                                                                                                                                  |
| N | A4FK76 | DR | metal ion binding                                                                                                                                                                                                                                |
| N | A4FM36 | CC | Required for maturation of 30S ribosomal subunits (By similarity).                                                                                                                                                                               |
| N | A4FM36 | DE | Ribosome maturation factor rimP;                                                                                                                                                                                                                 |
| N | A4FM36 | DR | ribosome biogenesis                                                                                                                                                                                                                              |
| N | A4FMD4 | CC | Responsible for the release of ribosomes from messenger RNA at the termination of protein biosynthesis                                                                                                                                           |
| N | A4FMD4 | CC | May increase the efficiency of translation by recycling ribosomes from one round of translation to another (By similarity).                                                                                                                      |
| N | A4FMD4 | DE | Ribosome-recycling factor;                                                                                                                                                                                                                       |
| N | A4FMD4 | DE | Ribosome-releasing factor;                                                                                                                                                                                                                       |

|   |        |    |                                                                                                                                                                               |
|---|--------|----|-------------------------------------------------------------------------------------------------------------------------------------------------------------------------------|
| N | A4FWA1 | CC | with S4 and S12 plays an important role in translational accuracy (By similarity).                                                                                            |
| N | A4FWA1 | DE | 30S ribosomal protein S5P;                                                                                                                                                    |
| N | A4FWA1 | DR | structural constituent of ribosome                                                                                                                                            |
| N | A4G096 | DE | 50S ribosomal protein L21e;                                                                                                                                                   |
| N | A4G096 | DR | structural constituent of ribosome                                                                                                                                            |
| N | A4G1L0 | CC | Catalyzes the transfer of a ribosyl phosphate group from 5-phosphoribose 1-diphosphate to orotate, leading to the formation of orotidine monophosphate (OMP) (By similarity). |
| N | A4G1L0 | DE | Orotate phosphoribosyltransferase;                                                                                                                                            |
| N | A4G1L0 | DR | nucleoside metabolic process                                                                                                                                                  |
| N | A4G1L0 | DR | orotate phosphoribosyltransferase activity                                                                                                                                    |
| N | A4G1L0 | DR | pyrimidine nucleotide biosynthetic process                                                                                                                                    |
| N | A4G4H8 | DE | Acetohydroxy-acid isomeroreductase;                                                                                                                                           |
| N | A4G4H8 | DE | Alpha-keto-beta-hydroxylacyl reductoisomerase;                                                                                                                                |
| N | A4G4H8 | DE | Ketol-acid reductoisomerase;                                                                                                                                                  |
| N | A4G4H8 | DR | branched chain family amino acid biosynthetic process                                                                                                                         |
| N | A4G4H8 | DR | coenzyme binding                                                                                                                                                              |
| N | A4G4H8 | DR | ketol-acid reductoisomerase activity                                                                                                                                          |
| N | A4G4H8 | DR | oxidation-reduction process                                                                                                                                                   |
| N | A4G778 | DE | Lysine--tRNA ligase;                                                                                                                                                          |
| N | A4G778 | DE | Lysyl-tRNA synthetase;                                                                                                                                                        |
| N | A4G778 | DR | lysine-tRNA ligase activity                                                                                                                                                   |
| N | A4G778 | DR | lysyl-tRNA aminoacylation                                                                                                                                                     |
| N | A4G778 | DR | metal ion binding                                                                                                                                                             |
| N | A4G778 | DR | nucleic acid binding                                                                                                                                                          |
| N | A4G8X1 | DE | Aspartate--tRNA ligase;                                                                                                                                                       |
| N | A4G8X1 | DE | Aspartyl-tRNA synthetase;                                                                                                                                                     |
| N | A4G8X1 | DR | aspartate-tRNA ligase activity                                                                                                                                                |
| N | A4G8X1 | DR | aspartyl-tRNA aminoacylation                                                                                                                                                  |
| N | A4G8X1 | DR | nucleic acid binding                                                                                                                                                          |
| N | A4GGA6 | CC | DNA-dependent RNA polymerase catalyzes the transcription of DNA into RNA using the four ribonucleoside triphosphates as substrates (By similarity).                           |
| N | A4GGA6 | DE | DNA-directed RNA polymerase subunit beta';                                                                                                                                    |
| N | A4GGA6 | DE | Plastid-encoded RNA polymerase subunit beta';                                                                                                                                 |
| N | A4GGA6 | DE | RNA polymerase subunit beta';                                                                                                                                                 |
| N | A4GGA6 | DR | DNA-directed RNA polymerase activity                                                                                                                                          |
| N | A4GGB2 | CC | produces ATP from ADP in the presence of a proton gradient across the membrane.                                                                                               |
| N | A4GGB2 | CC | The alpha chain is a regulatory subunit (By similarity).                                                                                                                      |
| N | A4GGB2 | DE | ATP synthase F1 sector subunit alpha;                                                                                                                                         |
| N | A4GGB2 | DE | ATP synthase subunit alpha, chloroplastic;                                                                                                                                    |
| N | A4GGB2 | DE | F-ATPase subunit alpha;                                                                                                                                                       |
| N | A4GGB2 | DR | ATP hydrolysis coupled proton transport                                                                                                                                       |
| N | A4GGB2 | DR | ATP synthesis coupled proton transport                                                                                                                                        |
| N | A4GGB2 | DR | hydrogen ion transporting ATP synthase activity, rotational mechanism                                                                                                         |
| N | A4GGB2 | DR | proton-transporting ATPase activity, rotational mechanism                                                                                                                     |
| N | A4GGF5 | CC | One of the primary rRNA binding proteins, it binds directly to 16S rRNA where it nucleates assembly of the head domain of the 30S subunit (By similarity).                    |
| N | A4GGF5 | DE | 30S ribosomal protein S7, chloroplastic;                                                                                                                                      |
| N | A4GGF5 | DR | structural constituent of ribosome                                                                                                                                            |
| N | A4H207 | CC | Has antimicrobial activity (By similarity).                                                                                                                                   |
| N | A4H207 | DE | Beta-defensin 105A;                                                                                                                                                           |
| N | A4H207 | DE | Defensin, beta 105;                                                                                                                                                           |
| N | A4H207 | DE | Defensin, beta 105A;                                                                                                                                                          |
| N | A4H207 | DR | defense response to bacterium                                                                                                                                                 |
| N | A4HGN7 | CC | Catalyzes the dehydration of methylthioribulose-1- phosphate (MTRu-1-P) into 2,3-diketo-5-methylthiopentyl-1- phosphate (DK-MTP-1-P) (By similarity).                         |
| N | A4HGN7 | DE | MTRu-1-P dehydratase;                                                                                                                                                         |
| N | A4HGN7 | DE | Probable methylthioribulose-1-phosphate dehydratase;                                                                                                                          |
| N | A4HGN7 | DR | L-methionine salvage                                                                                                                                                          |
| N | A4HGN7 | DR | metal ion binding                                                                                                                                                             |
| N | A4HGN7 | DR | methylthioribulose 1-phosphate dehydratase activity                                                                                                                           |
| N | A4IF87 | DE | Acyl-CoA: dihydroxyacetonephosphate acyltransferase;                                                                                                                          |
| N | A4IF87 | DE | Dihydroxyacetone phosphate acyltransferase;                                                                                                                                   |
| N | A4IF87 | DE | Glycerone-phosphate O-acyltransferase;                                                                                                                                        |
| N | A4IF87 | DR | glycerone-phosphate O-acyltransferase activity                                                                                                                                |
| N | A4IFB4 | DE | BTB/POZ domain-containing protein KCTD7;                                                                                                                                      |

|   |        |    |                                                                                                                                                                                                                                         |
|---|--------|----|-----------------------------------------------------------------------------------------------------------------------------------------------------------------------------------------------------------------------------------------|
| N | A4IFB4 | DR | voltage-gated potassium channel activity                                                                                                                                                                                                |
| N | A4IHK6 | CC | Sodium-, chloride, pH-independent high affinity transport of large neutral amino acids (By similarity).                                                                                                                                 |
| N | A4IHK6 | DE | L-type amino acid transporter 4;                                                                                                                                                                                                        |
| N | A4IHK6 | DE | Large neutral amino acids transporter small subunit 4;                                                                                                                                                                                  |
| N | A4IHK6 | DE | Solute carrier family 43 member 2;                                                                                                                                                                                                      |
| N | A4IHK6 | DR | amino acid transport                                                                                                                                                                                                                    |
| N | A4IHK6 | DR | transmembrane transport                                                                                                                                                                                                                 |
| N | A4IQ61 | CC | Catalyzes the reversible reaction in which hydroxymethyl group from 5,10-methylenetetrahydrofolate is transferred onto alpha-ketoisovalerate to form ketopantoate (By similarity).                                                      |
| N | A4IQ61 | DE | 3-methyl-2-oxobutanoate hydroxymethyltransferase;                                                                                                                                                                                       |
| N | A4IQ61 | DE | Ketopantoate hydroxymethyltransferase;                                                                                                                                                                                                  |
| N | A4IQ61 | DR | 3-methyl-2-oxobutanoate hydroxymethyltransferase activity                                                                                                                                                                               |
| N | A4IQ61 | DR | metal ion binding                                                                                                                                                                                                                       |
| N | A4IQ61 | DR | methyltransferase activity                                                                                                                                                                                                              |
| N | A4IQ61 | DR | pantothenate biosynthetic process                                                                                                                                                                                                       |
| N | A4ITI0 | CC | NDH-1 shuttles electrons from NADH, via FMN and iron- sulfur (Fe-S) centers, to quinones in the respiratory chain                                                                                                                       |
| N | A4ITI0 | CC | Couples the redox reaction to proton translocation (for every two electrons transferred, four hydrogen ions are translocated across the cytoplasmic membrane), and thus conserves the redox energy in a proton gradient (By similarity) |
| N | A4ITI0 | CC | The immediate electron acceptor for the enzyme in this species is believed to be a menaquinone                                                                                                                                          |
| N | A4ITI0 | DE | NADH dehydrogenase I subunit K;                                                                                                                                                                                                         |
| N | A4ITI0 | DE | NADH-quinone oxidoreductase subunit K;                                                                                                                                                                                                  |
| N | A4ITI0 | DE | NDH-1 subunit K;                                                                                                                                                                                                                        |
| N | A4ITI0 | DR | ATP synthesis coupled electron transport                                                                                                                                                                                                |
| N | A4ITI0 | DR | NADH dehydrogenase (quinone) activity                                                                                                                                                                                                   |
| N | A4ITI0 | DR | quinone binding                                                                                                                                                                                                                         |
| N | A4IXL1 | CC | One of the proteins required for the normal export of preproteins out of the cell cytoplasm                                                                                                                                             |
| N | A4IXL1 | CC | It also specifically binds to its receptor secA (By similarity).                                                                                                                                                                        |
| N | A4IXL1 | CC | It is a molecular chaperone that binds to a subset of precursor proteins, maintaining them in a translocation-competent state                                                                                                           |
| N | A4IXL1 | DE | Protein-export protein secB 1;                                                                                                                                                                                                          |
| N | A4IXL1 | DR | protein tetramerization                                                                                                                                                                                                                 |
| N | A4IXL1 | DR | protein transport                                                                                                                                                                                                                       |
| N | A4IXL1 | DR | transmembrane transport                                                                                                                                                                                                                 |
| N | A4IXL1 | DR | unfolded protein binding                                                                                                                                                                                                                |
| N | A4IZR8 | CC | This is one of the proteins that binds and probably mediates the attachment of the 5S RNA into the large ribosomal subunit, where it forms part of the central protuberance (By similarity).                                            |
| N | A4IZR8 | DE | 50S ribosomal protein L18;                                                                                                                                                                                                              |
| N | A4IZR8 | DR | structural constituent of ribosome                                                                                                                                                                                                      |
| N | A4J5U0 | DE | Putative competence-damage inducible protein;                                                                                                                                                                                           |
| N | A4J5U0 | DR | Mo-molybdopterin cofactor biosynthetic process                                                                                                                                                                                          |
| N | A4J9D2 | DE | Arginine--tRNA ligase;                                                                                                                                                                                                                  |
| N | A4J9D2 | DE | Arginyl-tRNA synthetase;                                                                                                                                                                                                                |
| N | A4J9D2 | DR | arginine-tRNA ligase activity                                                                                                                                                                                                           |
| N | A4J9D2 | DR | arginyl-tRNA aminoacylation                                                                                                                                                                                                             |
| N | A4J9S5 | DE | 50S ribosomal protein L34;                                                                                                                                                                                                              |
| N | A4J9S5 | DR | structural constituent of ribosome                                                                                                                                                                                                      |
| N | A4JA22 | CC | NAD-binding protein involved in the addition of a carboxymethylaminomethyl (cmnm) group at the wobble position (U34) of certain tRNAs, forming tRNA-cmnm(5)s(2)U34 (By similarity).                                                     |
| N | A4JA22 | DE | Glucose-inhibited division protein A;                                                                                                                                                                                                   |
| N | A4JA22 | DE | tRNA uridine 5-carboxymethylaminomethyl modification enzyme MnmG;                                                                                                                                                                       |
| N | A4JA22 | DR | flavin adenine dinucleotide binding                                                                                                                                                                                                     |
| N | A4JA22 | DR | tRNA wobble uridine modification                                                                                                                                                                                                        |
| N | A4JA69 | CC | The glycine cleavage system catalyzes the degradation of glycine                                                                                                                                                                        |
| N | A4JA69 | CC | The P protein binds the alpha-amino group of glycine through its pyridoxal phosphate cofactor; CO(2) is released and the remaining methylamine moiety is then transferred to the lipoamide cofactor of the H protein (By similarity).   |
| N | A4JA69 | DE | Glycine cleavage system P-protein;                                                                                                                                                                                                      |

|   |        |    |                                                                                                                                                                   |
|---|--------|----|-------------------------------------------------------------------------------------------------------------------------------------------------------------------|
| N | A4JA69 | DE | Glycine decarboxylase;                                                                                                                                            |
| N | A4JA69 | DE | Glycine dehydrogenase [decarboxylating];                                                                                                                          |
| N | A4JA69 | DR | glycine dehydrogenase (decarboxylating) activity                                                                                                                  |
| N | A4JA69 | DR | glycine metabolic process                                                                                                                                         |
| N | A4JA69 | DR | oxidation-reduction process                                                                                                                                       |
| N | A4JA69 | DR | pyridoxal phosphate binding                                                                                                                                       |
| N | A4JAN2 | CC | DNA-dependent RNA polymerase catalyzes the transcription of DNA into RNA using the four ribonucleoside triphosphates as substrates.                               |
| N | A4JAN2 | DE | DNA-directed RNA polymerase subunit beta;                                                                                                                         |
| N | A4JAN2 | DE | RNA polymerase subunit beta;                                                                                                                                      |
| N | A4JAN2 | DE | RNAP subunit beta;                                                                                                                                                |
| N | A4JAN2 | DE | Transcriptase subunit beta;                                                                                                                                       |
| N | A4JAN2 | DR | DNA-directed RNA polymerase activity                                                                                                                              |
| N | A4JAN2 | DR | ribonucleoside binding                                                                                                                                            |
| N | A4JAP5 | CC | This protein binds specifically to 23S rRNA; its binding is stimulated by other ribosomal proteins, e.g., L4, L17, and L20                                        |
| N | A4JAP5 | CC | It is important during the early stages of 50S assembly                                                                                                           |
| N | A4JAP5 | CC | It makes multiple contacts with different domains of the 23S rRNA in the assembled 50S subunit and ribosome (By similarity).                                      |
| N | A4JAP5 | DE | 50S ribosomal protein L22;                                                                                                                                        |
| N | A4JAP5 | DR | structural constituent of ribosome                                                                                                                                |
| N | A4JB51 | CC | Catalyzes the NADPH-dependent reduction of glutamyl- tRNA(Glu) to glutamate 1-semialdehyde (GSA) (By similarity).                                                 |
| N | A4JB51 | DE | Glutamyl-tRNA reductase;                                                                                                                                          |
| N | A4JB51 | DR | glutamyl-tRNA reductase activity                                                                                                                                  |
| N | A4JB51 | DR | oxidation-reduction process                                                                                                                                       |
| N | A4JB51 | DR | porphyrin biosynthetic process                                                                                                                                    |
| N | A4JB51 | DR | shikimate 5-dehydrogenase activity                                                                                                                                |
| N | A4JBD7 | CC | Methylates ribosomal protein L11 (By similarity).                                                                                                                 |
| N | A4JBD7 | DE | Ribosomal protein L11 methyltransferase;                                                                                                                          |
| N | A4JBD7 | DR | protein methyltransferase activity                                                                                                                                |
| N | A4JCP8 | CC | Catalyzes the condensation reaction of fatty acid synthesis by the addition to an acyl acceptor of two carbons from malonyl-ACP                                   |
| N | A4JCP8 | CC | Catalyzes the first condensation reaction which initiates fatty acid synthesis and may therefore play a role in governing the total rate of fatty acid production |
| N | A4JCP8 | CC | Its substrate specificity determines the biosynthesis of branched- chain and/or straight-chain of fatty acids (By similarity).                                    |
| N | A4JCP8 | CC | Possesses both acetoacetyl-ACP synthase and acetyl transacylase activities                                                                                        |
| N | A4JCP8 | DE | 3-oxoacyl-[acyl-carrier-protein] synthase 3;                                                                                                                      |
| N | A4JCP8 | DE | 3-oxoacyl-[acyl-carrier-protein] synthase III;                                                                                                                    |
| N | A4JCP8 | DE | Beta-ketoacyl-ACP synthase III;                                                                                                                                   |
| N | A4JCP8 | DR | 3-oxoacyl-[acyl-carrier-protein] synthase activity                                                                                                                |
| N | A4JCP8 | DR | fatty acid biosynthetic process                                                                                                                                   |
| N | A4QC57 | CC | Transport of potassium into the cell (By similarity).                                                                                                             |
| N | A4QC57 | DE | Probable potassium transport system protein kup;                                                                                                                  |
| N | A4QC57 | DR | potassium ion transmembrane transporter activity                                                                                                                  |
| N | A4QDU2 | CC | Reversibly transfers an adenyl group from ATP to 4'- phosphopantetheine, yielding dephospho-CoA (dPCoA) and pyrophosphate (By similarity).                        |
| N | A4QDU2 | DE | Dephospho-CoA pyrophosphorylase;                                                                                                                                  |
| N | A4QDU2 | DE | Pantetheine-phosphate adenyltransferase;                                                                                                                          |
| N | A4QDU2 | DE | Phosphopantetheine adenyltransferase;                                                                                                                             |
| N | A4QDU2 | DR | coenzyme A biosynthetic process                                                                                                                                   |
| N | A4QDU2 | DR | pantetheine-phosphate adenyltransferase activity                                                                                                                  |
| N | A4QGX4 | CC | Catalyzes the transfer of acetyl from acetyl-CoA to desacetylmecythiol (Cys-GlcN-Ins) to form mecythiol (By similarity).                                          |
| N | A4QGX4 | DE | MSH acetyltransferase;                                                                                                                                            |
| N | A4QGX4 | DE | Mecythiol acetyltransferase;                                                                                                                                      |
| N | A4QGX4 | DE | Mecythiol synthase;                                                                                                                                               |
| N | A4QGX4 | DR | N-acetyltransferase activity                                                                                                                                      |
| N | A4QH41 | DE | Cysteine--tRNA ligase;                                                                                                                                            |
| N | A4QH41 | DE | Cysteinyl-tRNA synthetase;                                                                                                                                        |
| N | A4QH41 | DR | cysteine-tRNA ligase activity                                                                                                                                     |
| N | A4QH41 | DR | cysteinyl-tRNA aminoacylation                                                                                                                                     |
| N | A4QH41 | DR | metal ion binding                                                                                                                                                 |
| N | A4QJC2 | CC | Produces ATP from ADP in the presence of a proton gradient across the membrane                                                                                    |

|   |        |    |                                                                                                                                                                                                                                                                                                                                           |
|---|--------|----|-------------------------------------------------------------------------------------------------------------------------------------------------------------------------------------------------------------------------------------------------------------------------------------------------------------------------------------------|
| N | A4QJC2 | CC | The catalytic sites are hosted primarily by the beta subunits (By similarity).                                                                                                                                                                                                                                                            |
| N | A4QJC2 | DE | ATP synthase F1 sector subunit beta;                                                                                                                                                                                                                                                                                                      |
| N | A4QJC2 | DE | ATP synthase subunit beta, chloroplastic;                                                                                                                                                                                                                                                                                                 |
| N | A4QJC2 | DE | F-ATPase subunit beta;                                                                                                                                                                                                                                                                                                                    |
| N | A4QJC2 | DR | ATP hydrolysis coupled proton transport                                                                                                                                                                                                                                                                                                   |
| N | A4QJC2 | DR | ATP synthesis coupled proton transport                                                                                                                                                                                                                                                                                                    |
| N | A4QJC2 | DR | hydrogen ion transporting ATP synthase activity, rotational mechanism                                                                                                                                                                                                                                                                     |
| N | A4QJC2 | DR | hydrogen-exporting ATPase activity, phosphorylative mechanism                                                                                                                                                                                                                                                                             |
| N | A4QJC2 | DR | proton-transporting ATPase activity, rotational mechanism                                                                                                                                                                                                                                                                                 |
| N | A4QJM7 | DE | Protein psbN;                                                                                                                                                                                                                                                                                                                             |
| N | A4QJM7 | DR | photosynthesis                                                                                                                                                                                                                                                                                                                            |
| N | A4QJQ3 | CC | NDH shuttles electrons from NAD(P)H:plastoquinone, via FMN and iron-sulfur (Fe-S) centers, to quinones in the photosynthetic chain and possibly in a chloroplast respiratory chain                                                                                                                                                        |
| N | A4QJQ3 | CC | Couples the redox reaction to proton translocation, and thus conserves the redox energy in a proton gradient (By similarity).                                                                                                                                                                                                             |
| N | A4QJQ3 | CC | The immediate electron acceptor for the enzyme in this species is believed to be plastoquinone                                                                                                                                                                                                                                            |
| N | A4QJQ3 | DE | NAD(P)H dehydrogenase subunit 6;                                                                                                                                                                                                                                                                                                          |
| N | A4QJQ3 | DE | NAD(P)H-quinone oxidoreductase subunit 6, chloroplastic;                                                                                                                                                                                                                                                                                  |
| N | A4QJQ3 | DE | NADH-plastoquinone oxidoreductase subunit 6;                                                                                                                                                                                                                                                                                              |
| N | A4QJQ3 | DR | NADH dehydrogenase (ubiquinone) activity                                                                                                                                                                                                                                                                                                  |
| N | A4QJQ3 | DR | oxidation-reduction process                                                                                                                                                                                                                                                                                                               |
| N | A4QJQ3 | DR | quinone binding                                                                                                                                                                                                                                                                                                                           |
| N | A4QKL5 | CC | Binds directly to 23S ribosomal RNA and is necessary for the in vitro assembly process of the 50S ribosomal subunit                                                                                                                                                                                                                       |
| N | A4QKL5 | CC | it is not involved in the protein synthesizing functions of that subunit (By similarity)                                                                                                                                                                                                                                                  |
| N | A4QKL5 | DE | 50S ribosomal protein L20, chloroplastic;                                                                                                                                                                                                                                                                                                 |
| N | A4QKL5 | DR | structural constituent of ribosome                                                                                                                                                                                                                                                                                                        |
| N | A4QKN3 | DE | 50S ribosomal protein L2, chloroplastic;                                                                                                                                                                                                                                                                                                  |
| N | A4QKN3 | DR | structural constituent of ribosome                                                                                                                                                                                                                                                                                                        |
| N | A4QKN3 | DR | transferase activity                                                                                                                                                                                                                                                                                                                      |
| N | A4QKQ3 | CC | Unknown                                                                                                                                                                                                                                                                                                                                   |
| N | A4QKQ3 | CC | Its presence in a non-photosynthetic plant ( <i>Epifagus virginiana</i> ) and experiments in tobacco indicate that it may have a function which is probably not related to photosynthesis.                                                                                                                                                |
| N | A4QKQ3 | DE | Putative membrane protein ycf1;                                                                                                                                                                                                                                                                                                           |
| N | A4R9U5 | CC | Involved in the biogenesis of the 60S ribosomal subunit (By similarity).                                                                                                                                                                                                                                                                  |
| N | A4R9U5 | DE | Nucleolar protein 16;                                                                                                                                                                                                                                                                                                                     |
| N | A4R9U5 | DR | rRNA processing                                                                                                                                                                                                                                                                                                                           |
| N | A4RC23 | CC | Component of the nascent polypeptide-associated complex (NAC), a dynamic component of the ribosomal exit tunnel, protecting the emerging polypeptides from interaction with other cytoplasmic proteins to ensure appropriate nascent protein targeting (By similarity)                                                                    |
| N | A4RC23 | CC | EGD1 may act as a transcription factor that exert a negative effect on the expression of several genes that are transcribed by RNA polymerase II (By similarity)                                                                                                                                                                          |
| N | A4RC23 | CC | The NAC complex also promotes mitochondrial protein import by enhancing productive ribosome interactions with the outer mitochondrial membrane and blocks the inappropriate interaction of ribosomes translating non-secretory nascent polypeptides with translocation sites in the membrane of the endoplasmic reticulum (By similarity) |
| N | A4RC23 | DE | Nascent polypeptide-associated complex subunit beta;                                                                                                                                                                                                                                                                                      |
| N | A4RC23 | DR | protein transport                                                                                                                                                                                                                                                                                                                         |
| N | A4RK68 | CC | Component of the eukaryotic translation initiation factor 3 (eIF-3) complex, which is involved in protein synthesis and, together with other initiation factors, stimulates binding of mRNA and methionyl-tRNAi to the 40S ribosome (By similarity)                                                                                       |
| N | A4RK68 | DE | Eukaryotic translation initiation factor 3 subunit M;                                                                                                                                                                                                                                                                                     |
| N | A4RK68 | DR | translation initiation factor activity                                                                                                                                                                                                                                                                                                    |
| N | A4SCQ4 | CC | With S4 and S5 plays an important role in translational accuracy (By similarity).                                                                                                                                                                                                                                                         |
| N | A4SCQ4 | DE | 30S ribosomal protein S12;                                                                                                                                                                                                                                                                                                                |
| N | A4SCQ4 | DR | structural constituent of ribosome                                                                                                                                                                                                                                                                                                        |
| N | A4SFT2 | CC | This protein binds to 23S rRNA in the presence of protein L20 (By similarity).                                                                                                                                                                                                                                                            |
| N | A4SFT2 | DE | 50S ribosomal protein L21;                                                                                                                                                                                                                                                                                                                |
| N | A4SFT2 | DR | structural constituent of ribosome                                                                                                                                                                                                                                                                                                        |
| N | A4SHU9 | CC | DNA-dependent RNA polymerase catalyzes the transcription of DNA into RNA using the four ribonucleoside triphosphates as substrates.                                                                                                                                                                                                       |



|   |        |    |                                                                                                                                                                                   |
|---|--------|----|-----------------------------------------------------------------------------------------------------------------------------------------------------------------------------------|
| N | A4SHU9 | DE | DNA-directed RNA polymerase subunit beta;                                                                                                                                         |
| N | A4SHU9 | DE | RNA polymerase subunit beta;                                                                                                                                                      |
| N | A4SHU9 | DE | RNAP subunit beta;                                                                                                                                                                |
| N | A4SHU9 | DE | Transcriptase subunit beta;                                                                                                                                                       |
| N | A4SHU9 | DR | DNA-directed RNA polymerase activity                                                                                                                                              |
| N | A4SHU9 | DR | ribonucleoside binding                                                                                                                                                            |
| N | A4SNB5 | CC | Catalyzes the transfer of a methyl group from 5- methyltetrahydrofolate to homocysteine resulting in methionine formation (By similarity).                                        |
| N | A4SNB5 | DE | 5-methyltetrahydropteroyltriglutamate--homocysteine methyltransferase;                                                                                                            |
| N | A4SNB5 | DE | Cobalamin-independent methionine synthase;                                                                                                                                        |
| N | A4SNB5 | DE | Methionine synthase, vitamin-B12 independent isozyme;                                                                                                                             |
| N | A4SNB5 | DR | 5-methyltetrahydropteroyltriglutamate-homocysteine S-methyltransferase activity                                                                                                   |
| N | A4SNB5 | DR | methionine biosynthetic process                                                                                                                                                   |
| N | A4SNB5 | DR | zinc ion binding                                                                                                                                                                  |
| N | A4ST17 | CC | Shows carboxylesterase activity with a preference for short chain fatty acid esters (acyl chain length of up to 6 carbons)                                                        |
| N | A4ST17 | CC | Also displays a weak thioesterase activity                                                                                                                                        |
| N | A4ST17 | CC | Can form a complex with CoA, and may be involved in the condensation of CoA and pimelic acid into pimeloyl-CoA, a precursor in biotin biosynthesis (By similarity)                |
| N | A4ST17 | DE | Biotin synthesis protein BioH;                                                                                                                                                    |
| N | A4ST17 | DE | Carboxylesterase BioH;                                                                                                                                                            |
| N | A4ST17 | DR | biotin biosynthetic process                                                                                                                                                       |
| N | A4ST17 | DR | methyl indole-3-acetate esterase activity                                                                                                                                         |
| N | A4ST17 | DR | methyl jasmonate esterase activity                                                                                                                                                |
| N | A4ST17 | DR | methyl salicylate esterase activity                                                                                                                                               |
| N | A4SUV0 | CC | This protein binds directly to 23S ribosomal RNA (By similarity).                                                                                                                 |
| N | A4SUV0 | DE | 50S ribosomal protein L11;                                                                                                                                                        |
| N | A4SUV0 | DR | structural constituent of ribosome                                                                                                                                                |
| N | A4SXH5 | CC | involved in cell division, probably involved in intracellular septation (By similarity)                                                                                           |
| N | A4SXH5 | DE | Probable intracellular septation protein;                                                                                                                                         |
| N | A4SXH5 | DR | barrier septum formation                                                                                                                                                          |
| N | A4T2C4 | CC | Negative regulator of class I heat shock genes (gipe- umak-umak and groELS operons)                                                                                               |
| N | A4T2C4 | CC | Prevents heat-shock induction of these operons (By similarity).                                                                                                                   |
| N | A4T2C4 | DE | Heat-inducible transcription repressor hrcA;                                                                                                                                      |
| N | A4T2C4 | DR | regulation of transcription, DNA-dependent                                                                                                                                        |
| N | A4T2C4 | DR | response to stress                                                                                                                                                                |
| N | A4T8H8 | DE | UPF0286 protein Mflv_2337;                                                                                                                                                        |
| N | A4TIM3 | CC | Catalyzes the transfer of 4-deoxy-4-formamido-L- arabinose from UDP to undecaprenyl phosphate                                                                                     |
| N | A4TIM3 | CC | The modified arabinose is attached to lipid A and is required for resistance to polymyxin and cationic antimicrobial peptides (By similarity).                                    |
| N | A4TIM3 | DE | Ara4FN transferase;                                                                                                                                                               |
| N | A4TIM3 | DE | Undecaprenyl-phosphate 4-deoxy-4-formamido-L-arabinose transferase;                                                                                                               |
| N | A4TIM3 | DE | Undecaprenyl-phosphate Ara4FN transferase;                                                                                                                                        |
| N | A4TIM3 | DR | lipid A biosynthetic process                                                                                                                                                      |
| N | A4TIM3 | DR | response to antibiotic                                                                                                                                                            |
| N | A4TIM3 | DR | transferase activity, transferring glycosyl groups                                                                                                                                |
| N | A4TIQ4 | CC | Is the main repressor of the genes involved in the de novo synthesis of purine nucleotides, regulating purB, purC, purEK, purF, purHD, purL, purMN and guaBA expression           |
| N | A4TIQ4 | CC | PurR is allosterically activated to bind its cognate DNA by binding the purine corepressors, hypoxanthine or guanine, thereby effecting transcription repression (By similarity). |
| N | A4TIQ4 | DE | HTH-type transcriptional repressor purR;                                                                                                                                          |
| N | A4TIQ4 | DE | Pur regulon repressor;                                                                                                                                                            |
| N | A4TIQ4 | DE | Purine nucleotide synthesis repressor;                                                                                                                                            |
| N | A4TIQ4 | DR | purine nucleotide biosynthetic process                                                                                                                                            |
| N | A4TIQ4 | DR | regulation of transcription, DNA-dependent                                                                                                                                        |
| N | A4TIQ4 | DR | sequence-specific DNA binding transcription factor activity                                                                                                                       |
| N | A4TJK3 | DE | UPF0082 protein YPDSF_1067;                                                                                                                                                       |
| N | A4TMV1 | CC | Co-chaperone involved in the maturation of non-signal cluster-containing proteins                                                                                                 |
| N | A4TMV1 | CC | Seems to help targeting proteins to be folded toward hscA (By similarity).                                                                                                        |
| N | A4TMV1 | DE | Co-chaperone protein hscB;                                                                                                                                                        |
| N | A4TMV1 | DR | chaperone binding                                                                                                                                                                 |
| N | A4TMV1 | DR | heat shock protein binding                                                                                                                                                        |

|   |        |    |                                                                                                                                                                                                                        |
|---|--------|----|------------------------------------------------------------------------------------------------------------------------------------------------------------------------------------------------------------------------|
| N | A4TMV1 | DR | protein folding                                                                                                                                                                                                        |
| N | A4TPJ4 | CC | Catalyzes the specific phosphorylation of the 3-hydroxyl group of shikimic acid using ATP as a cosubstrate (By similarity).                                                                                            |
| N | A4TPJ4 | DE | Shikimate kinase 2;                                                                                                                                                                                                    |
| N | A4TPJ4 | DR | aromatic amino acid family biosynthetic process                                                                                                                                                                        |
| N | A4TPJ4 | DR | metal ion binding                                                                                                                                                                                                      |
| N | A4TPJ4 | DR | shikimate kinase activity                                                                                                                                                                                              |
| N | A4TRR0 | CC | Prevents misfolding and promotes the refolding and proper assembly of unfolded polypeptides generated under stress conditions (By similarity).                                                                         |
| N | A4TRR0 | DE | 60 kDa chaperonin;                                                                                                                                                                                                     |
| N | A4TRR0 | DE | GroEL protein;                                                                                                                                                                                                         |
| N | A4TRR0 | DE | Protein Cpn60;                                                                                                                                                                                                         |
| N | A4TRR0 | DR | protein refolding                                                                                                                                                                                                      |
| N | A4VIR7 | CC | Together with moaA, is involved in the conversion of a guanosine derivative (5'-GTP) into molybdopterin precursor Z (By similarity).                                                                                   |
| N | A4VIR7 | DE | Molybdenum cofactor biosynthesis protein C;                                                                                                                                                                            |
| N | A4VIR7 | DR | Mo-molybdopterin cofactor biosynthetic process                                                                                                                                                                         |
| N | A4VPC3 | CC | Catalyzes the phosphorylation of the position 2 hydroxy group of 4-diphosphocytidyl-2C-methyl-D-erythritol (By similarity).                                                                                            |
| N | A4VPC3 | DE | 4-(cytidine-5'-diphospho)-2-C-methyl-D-erythritol kinase;                                                                                                                                                              |
| N | A4VPC3 | DE | 4-diphosphocytidyl-2-C-methyl-D-erythritol kinase;                                                                                                                                                                     |
| N | A4VPC3 | DR | 4-(cytidine 5'-diphospho)-2-C-methyl-D-erythritol kinase activity                                                                                                                                                      |
| N | A4VPC3 | DR | terpenoid biosynthetic process                                                                                                                                                                                         |
| N | A4VS81 | CC | Exhibits a very high intrinsic GTPase hydrolysis rate involved in the addition of a carboxymethylaminomethyl (cmnm) group at the wobble position (U34) of certain tRNAs, forming tRNA- cmnm(5)s(2)U34 (By similarity). |
| N | A4VS81 | CC | tRNA modification GTPase mnmE;                                                                                                                                                                                         |
| N | A4VS81 | DE | GTPase activity                                                                                                                                                                                                        |
| N | A4VS81 | DR | metal ion binding                                                                                                                                                                                                      |
| N | A4VS81 | DR | tRNA modification                                                                                                                                                                                                      |
| N | A4VS85 | DE | 50S ribosomal protein L34;                                                                                                                                                                                             |
| N | A4VS85 | DR | structural constituent of ribosome                                                                                                                                                                                     |
| N | A4VUD1 | CC | The heterodimer acts as both an ATP-dependent DNA helicase and an ATP-dependent, dual-direction single-stranded exonuclease                                                                                            |
| N | A4VUD1 | CC | Recognizes the chi site generating a DNA molecule suitable for the initiation of homologous recombination                                                                                                              |
| N | A4VUD1 | CC | This subunit has 5' -> 3' nuclease activity (By similarity).                                                                                                                                                           |
| N | A4VUD1 | DE | ATP-dependent helicase/deoxyribonuclease subunit B;                                                                                                                                                                    |
| N | A4VUD1 | DE | ATP-dependent helicase/nuclease RexB;                                                                                                                                                                                  |
| N | A4VUD1 | DR | exonuclease activity                                                                                                                                                                                                   |
| N | A4VUD1 | DR | hydrolase activity, acting on acid anhydrides                                                                                                                                                                          |
| N | A4VZC6 | CC | Formation of pseudouridine at positions 38, 39 and 40 in the anticodon stem and loop of transfer RNAs (By similarity).                                                                                                 |
| N | A4VZC6 | DE | tRNA pseudouridine synthase A;                                                                                                                                                                                         |
| N | A4VZC6 | DE | tRNA pseudouridylate synthase I;                                                                                                                                                                                       |
| N | A4VZC6 | DE | tRNA-uridine isomerase I;                                                                                                                                                                                              |
| N | A4VZC6 | DR | pseudouridine synthase activity                                                                                                                                                                                        |
| N | A4VZC6 | DR | pseudouridine synthesis                                                                                                                                                                                                |
| N | A4VZC6 | DR | tRNA processing                                                                                                                                                                                                        |
| N | A4W0M6 | CC | The heterodimer acts as both an ATP-dependent DNA helicase and an ATP-dependent, dual-direction single-stranded exonuclease                                                                                            |
| N | A4W0M6 | CC | Recognizes the chi site generating a DNA molecule suitable for the initiation of homologous recombination                                                                                                              |
| N | A4W0M6 | CC | This subunit has 5' -> 3' nuclease activity (By similarity).                                                                                                                                                           |
| N | A4W0M6 | DE | ATP-dependent helicase/deoxyribonuclease subunit B;                                                                                                                                                                    |
| N | A4W0M6 | DE | ATP-dependent helicase/nuclease RexB;                                                                                                                                                                                  |
| N | A4W0M6 | DR | exonuclease activity                                                                                                                                                                                                   |
| N | A4W0M6 | DR | hydrolase activity, acting on acid anhydrides                                                                                                                                                                          |
| N | A4W5C7 | DE | Homoserine O-succinyltransferase;                                                                                                                                                                                      |
| N | A4W5C7 | DE | Homoserine O-transsuccinylase;                                                                                                                                                                                         |
| N | A4W5C7 | DR | L-methionine biosynthetic process from homoserine via O-succinyl-L-homoserine and cystathionine                                                                                                                        |
| N | A4W5C7 | DR | homoserine O-succinyltransferase activity                                                                                                                                                                              |
| N | A4W6I4 | DE | Protein MraZ;                                                                                                                                                                                                          |

|   |        |    |                                                                                                                                                                                                                                                                |
|---|--------|----|----------------------------------------------------------------------------------------------------------------------------------------------------------------------------------------------------------------------------------------------------------------|
| N | A4W6V2 | CC | Thiolesterase that catalyzes the hydrolysis of S-D- lactoyl-glutathione to form glutathione and D-lactic acid (By similarity).                                                                                                                                 |
| N | A4W6V2 | DE | Glyoxalase II;                                                                                                                                                                                                                                                 |
| N | A4W6V2 | DE | Hydroxyacylglutathione hydrolase;                                                                                                                                                                                                                              |
| N | A4W6V2 | DR | hydroxyacylglutathione hydrolase activity                                                                                                                                                                                                                      |
| N | A4W6V2 | DR | zinc ion binding                                                                                                                                                                                                                                               |
| N | A4WCC2 | DE | Multidrug resistance protein MdtC;                                                                                                                                                                                                                             |
| N | A4WCC2 | DE | Multidrug transporter MdtC;                                                                                                                                                                                                                                    |
| N | A4WCC2 | DR | transporter activity                                                                                                                                                                                                                                           |
| N | A4WER5 | CC | Regulates transcription of many different genes                                                                                                                                                                                                                |
| N | A4WER5 | CC | In the absence of autoinducer 2 (AI-2), represses transcription of the <i>lsrACDBFG</i> operon and its own transcription                                                                                                                                       |
| N | A4WER5 | CC | In the presence of AI- 2, <i>lsrR</i> is inactivated by binding phospho-AI-2, leading to the transcription of the <i>lsr</i> genes (By similarity).                                                                                                            |
| N | A4WER5 | DE | Transcriptional regulator <i>lsrR</i> ;                                                                                                                                                                                                                        |
| N | A4WER5 | DR | carbohydrate binding                                                                                                                                                                                                                                           |
| N | A4WER5 | DR | transcription regulator activity                                                                                                                                                                                                                               |
| N | A4WFD8 | CC | Part of a sulfur-relay system required for 2-thiolation of 5-methylaminomethyl-2-thiouridine (mnm(5)s(2)U) at tRNA wobble positions                                                                                                                            |
| N | A4WFD8 | CC | Accepts sulfur from <i>tusA</i> and transfers it in turn to <i>tusE</i> (By similarity).                                                                                                                                                                       |
| N | A4WFD8 | DE | Sulfurtransferase <i>tusD</i> ;                                                                                                                                                                                                                                |
| N | A4WFD8 | DE | tRNA 2-thiouridine synthesizing protein <i>D</i> ;                                                                                                                                                                                                             |
| N | A4WFD8 | DR | sulfurtransferase activity                                                                                                                                                                                                                                     |
| N | A4WFD8 | DR | tRNA processing                                                                                                                                                                                                                                                |
| N | A4WFL5 | CC | Catalyzes the formation of the alpha-1,6-glucosidic linkages in glycogen by scission of a 1,4-alpha-linked oligosaccharide from growing alpha-1,4-glucan chains and the subsequent attachment of the oligosaccharide to the alpha-1,6 position (By similarity) |
| N | A4WFL5 | DE | 1,4-alpha-D-glucan:1,4-alpha-D-glucan 6-glucosyl-transferase;                                                                                                                                                                                                  |
| N | A4WFL5 | DE | 1,4-alpha-glucan-branching enzyme;                                                                                                                                                                                                                             |
| N | A4WFL5 | DE | Glycogen-branching enzyme;                                                                                                                                                                                                                                     |
| N | A4WFL5 | DR | 1,4-alpha-glucan branching enzyme activity                                                                                                                                                                                                                     |
| N | A4WFL5 | DR | cation binding                                                                                                                                                                                                                                                 |
| N | A4WFL5 | DR | glycogen biosynthetic process                                                                                                                                                                                                                                  |
| N | A4WFL5 | DR | hydrolase activity, hydrolyzing O-glycosyl compounds                                                                                                                                                                                                           |
| N | A4WG69 | CC | Globally modulates RNA abundance by binding to RNase E ( <i>Rne</i> ) and regulating its endonucleolytic activity                                                                                                                                              |
| N | A4WG69 | CC | Can modulate <i>Rne</i> action in a substrate-dependent manner by altering the composition of the degradosome                                                                                                                                                  |
| N | A4WG69 | CC | modulates RNA-binding and nuclease activities of the degradosome (By similarity)                                                                                                                                                                               |
| N | A4WG69 | DE | Regulator of ribonuclease activity <i>A</i> ;                                                                                                                                                                                                                  |
| N | A4WG69 | DR | regulation of RNA metabolic process                                                                                                                                                                                                                            |
| N | A4WG69 | DR | ribonuclease inhibitor activity                                                                                                                                                                                                                                |
| N | A4WH03 | DE | 30S ribosomal protein <i>S17e</i> ;                                                                                                                                                                                                                            |
| N | A4WH03 | DR | structural constituent of ribosome                                                                                                                                                                                                                             |
| N | A4WNY9 | CC | <i>F(1)F(0)</i> ATP synthase produces ATP from ADP in the presence of a proton or sodium gradient                                                                                                                                                              |
| N | A4WNY9 | CC | During catalysis, ATP synthesis in the catalytic domain of <i>F(1)</i> is coupled via a rotary mechanism of the central stalk subunits to proton translocation (By similarity)                                                                                 |
| N | A4WNY9 | CC | <i>F</i> -type ATPases consist of two structural domains, <i>F(1)</i> containing the extramembraneous catalytic core and <i>F(0)</i> containing the membrane proton channel, linked together by a central stalk and a peripheral stalk                         |
| N | A4WNY9 | DE | ATP synthase <i>F(0)</i> sector subunit <i>b</i> ;                                                                                                                                                                                                             |
| N | A4WNY9 | DE | ATP synthase subunit <i>b</i> ;                                                                                                                                                                                                                                |
| N | A4WNY9 | DE | ATPase subunit <i>I</i> ;                                                                                                                                                                                                                                      |
| N | A4WNY9 | DE | <i>F</i> -ATPase subunit <i>b</i> ;                                                                                                                                                                                                                            |
| N | A4WNY9 | DE | <i>F</i> -type ATPase subunit <i>b</i> ;                                                                                                                                                                                                                       |
| N | A4WNY9 | DR | ATP synthesis coupled proton transport                                                                                                                                                                                                                         |
| N | A4WNY9 | DR | hydrogen ion transmembrane transporter activity                                                                                                                                                                                                                |
| N | A4WPR4 | DE | UPF0102 protein <i>Rsph17025_0472</i> ;                                                                                                                                                                                                                        |
| N | A4WPR4 | DR | nuclease activity                                                                                                                                                                                                                                              |
| N | A4WRD4 | CC | Catalyzes the methylthiolation of an aspartic acid residue of ribosomal protein <i>S12</i> (By similarity).                                                                                                                                                    |
| N | A4WRD4 | DE | Ribosomal protein <i>S12</i> methylthiotransferase <i>RimO</i> ;                                                                                                                                                                                               |
| N | A4WRD4 | DE | Ribosome maturation factor <i>RimO</i> ;                                                                                                                                                                                                                       |
| N | A4WRD4 | DE | <i>S12</i> MTTase;                                                                                                                                                                                                                                             |

|   |        |    |                                                                                                                                                                                                           |
|---|--------|----|-----------------------------------------------------------------------------------------------------------------------------------------------------------------------------------------------------------|
| N | A4WRD4 | DE | S12 methylthiotransferase;                                                                                                                                                                                |
| N | A4WRD4 | DR | 4 iron, 4 sulfur cluster binding                                                                                                                                                                          |
| N | A4WRD4 | DR | RNA modification                                                                                                                                                                                          |
| N | A4WRD4 | DR | metal ion binding                                                                                                                                                                                         |
| N | A4WRD4 | DR | pepuyyl-L-beta-methylnuioaspartic acid biosynthetic process from pepuyyl-<br>aspartic acid                                                                                                                |
| N | A4WRD4 | DR | transferase activity                                                                                                                                                                                      |
| N | A4X4I2 | CC | Endonuclease that specifically degrades the RNA of RNA- DNA hybrids (By<br>similarity).                                                                                                                   |
| N | A4X4I2 | DE | Ribonuclease HII;                                                                                                                                                                                         |
| N | A4X4I2 | DR | metal ion binding                                                                                                                                                                                         |
| N | A4X4I2 | DR | ribonuclease H activity                                                                                                                                                                                   |
| N | A4XAW2 | CC | PRODUCES ATP FROM ADP IN THE PRESENCE OF A PROTON GRADIENT ACROSS THE<br>MEMBRANE                                                                                                                         |
| N | A4XAW2 | CC | The catalytic sites are hosted primarily by the beta subunits (By similarity).                                                                                                                            |
| N | A4XAW2 | DE | ATP synthase F1 sector subunit beta;                                                                                                                                                                      |
| N | A4XAW2 | DE | ATP synthase subunit beta;                                                                                                                                                                                |
| N | A4XAW2 | DE | F-ATPase subunit beta;                                                                                                                                                                                    |
| N | A4XAW2 | DR | ATP hydrolysis coupled proton transport                                                                                                                                                                   |
| N | A4XAW2 | DR | ATP synthesis coupled proton transport                                                                                                                                                                    |
| N | A4XAW2 | DR | hydrogen ion transporting ATP synthase activity, rotational mechanism                                                                                                                                     |
| N | A4XAW2 | DR | hydrogen-exporting ATPase activity, phosphorylative mechanism                                                                                                                                             |
| N | A4XAW2 | DR | proton-transporting ATPase activity, rotational mechanism                                                                                                                                                 |
| N | A4XG37 | DE | UPF0251 protein Csc_0224;                                                                                                                                                                                 |
| N | A4XI01 | CC | First step of the lipid cycle reactions in the biosynthesis of the cell wall<br>peptidoglycan (By similarity).                                                                                            |
| N | A4XI01 | DE | Phospho-N-acetylmuramoyl-pentapeptide-transferase;                                                                                                                                                        |
| N | A4XI01 | DE | UDP-MurNAc-pentapeptide phosphotransferase;                                                                                                                                                               |
| N | A4XI01 | DR | UDP-N-acetylmuramoyl-L-alanyl-D-glutamyl-meso-2,6-diaminopimelyl-D-<br>alanyl-D-alanine:undecaprenyl-phosphate transferase activity                                                                       |
| N | A4XI01 | DR | cell division                                                                                                                                                                                             |
| N | A4XI01 | DR | cellular cell wall organization                                                                                                                                                                           |
| N | A4XI01 | DR | peptidoglycan biosynthetic process                                                                                                                                                                        |
| N | A4XI01 | DR | phospho-N-acetylmuramoyl-pentapeptide-transferase activity                                                                                                                                                |
| N | A4XI01 | DR | regulation of cell shape                                                                                                                                                                                  |
| N | A4XIA5 | CC | Binds directly to 16S ribosomal RNA (By similarity).                                                                                                                                                      |
| N | A4XIA5 | DE | 30S ribosomal protein S20;                                                                                                                                                                                |
| N | A4XIA5 | DR | structural constituent of ribosome                                                                                                                                                                        |
| N | A4XS59 | DE | NH(3)-dependent NAD(+) synthetase;                                                                                                                                                                        |
| N | A4XS59 | DR | NAD biosynthetic process                                                                                                                                                                                  |
| N | A4XS59 | DR | NAD+ synthase (glutamine-hydrolyzing) activity                                                                                                                                                            |
| N | A4XS59 | DR | NAD+ synthase activity                                                                                                                                                                                    |
| N | A4XV44 | CC | Catalyzes the transfer of selenium from selenophosphate for conversion of 2-<br>thiouridine to 2-selenouridine at the wobble position in tRNA (By similarity).                                            |
| N | A4XV44 | DE | Selenophosphate-dependent tRNA 2-selenouridine synthase;                                                                                                                                                  |
| N | A4XV44 | DE | tRNA 2-selenouridine synthase;                                                                                                                                                                            |
| N | A4XV44 | DR | selenium binding                                                                                                                                                                                          |
| N | A4XV44 | DR | selenium compound metabolic process                                                                                                                                                                       |
| N | A4XV44 | DR | transferase activity, transferring selenium-containing groups                                                                                                                                             |
| N | A4XWT1 | DE | UDP-3-O-[3-hydroxymyristoyl] glucosamine N-acyltransferase;                                                                                                                                               |
| N | A4XWT1 | DR | acyltransferase activity                                                                                                                                                                                  |
| N | A4XWT1 | DR | lipid A biosynthetic process                                                                                                                                                                              |
| N | A4XYV5 | CC | Condenses 4-methyl-5-(beta-hydroxyethyl)thiazole monophosphate (THZ-P) and<br>2-methyl-4-amino-5-hydroxymethyl pyrimidine pyrophosphate (HMP-PP) to<br>form thiamine monophosphate (TMP) (By similarity). |
| N | A4XYV5 | DE | TMP pyrophosphorylase;                                                                                                                                                                                    |
| N | A4XYV5 | DE | Thiamine-phosphate pyrophosphorylase;                                                                                                                                                                     |
| N | A4XYV5 | DE | Thiamine-phosphate synthase;                                                                                                                                                                              |
| N | A4XYV5 | DR | metal ion binding                                                                                                                                                                                         |
| N | A4XYV5 | DR | thiamine biosynthetic process                                                                                                                                                                             |
| N | A4XYV5 | DR | thiamine-phosphate diphosphorylase activity                                                                                                                                                               |
| N | A4XZ66 | CC | One of the primary rRNA binding proteins, it binds directly to 16S rRNA where<br>it nucleates assembly of the body of the 30S subunit (By similarity).                                                    |
| N | A4XZ66 | DE | 30S ribosomal protein S4;                                                                                                                                                                                 |
| N | A4XZ66 | DR | structural constituent of ribosome                                                                                                                                                                        |
| N | A4Y187 | CC | PRODUCES ATP FROM ADP IN THE PRESENCE OF A PROTON GRADIENT ACROSS THE<br>MEMBRANE                                                                                                                         |
| N | A4Y187 | CC | The catalytic sites are hosted primarily by the beta subunits (By similarity).                                                                                                                            |

|   |        |    |                                                                                                                                                                                                                                                                                                                   |
|---|--------|----|-------------------------------------------------------------------------------------------------------------------------------------------------------------------------------------------------------------------------------------------------------------------------------------------------------------------|
| N | A4Y187 | DE | ATP synthase F1 sector subunit beta;                                                                                                                                                                                                                                                                              |
| N | A4Y187 | DE | ATP synthase subunit beta;                                                                                                                                                                                                                                                                                        |
| N | A4Y187 | DE | F-ATPase subunit beta;                                                                                                                                                                                                                                                                                            |
| N | A4Y187 | DR | ATP hydrolysis coupled proton transport                                                                                                                                                                                                                                                                           |
| N | A4Y187 | DR | ATP synthesis coupled proton transport                                                                                                                                                                                                                                                                            |
| N | A4Y187 | DR | hydrogen ion transporting ATP synthase activity, rotational mechanism                                                                                                                                                                                                                                             |
| N | A4Y187 | DR | hydrogen-exporting ATPase activity, phosphorylative mechanism                                                                                                                                                                                                                                                     |
| N | A4Y187 | DR | proton-transporting ATPase activity, rotational mechanism                                                                                                                                                                                                                                                         |
| N | A4Y2P4 | CC | Part of the Sec protein translocase complex                                                                                                                                                                                                                                                                       |
| N | A4Y2P4 | CC | Has a central role in coupling the hydrolysis of ATP to the transfer of proteins into and across the cell membrane, serving both as a receptor for the preprotein-secB complex and as an ATP-driven molecular motor driving the stepwise translocation of polypeptide chains across the membrane (By similarity). |
| N | A4Y2P4 | CC | Interacts with the secYEG preprotein conducting channel                                                                                                                                                                                                                                                           |
| N | A4Y2P4 | DE | Protein translocase subunit secA;                                                                                                                                                                                                                                                                                 |
| N | A4Y2P4 | DR | metal ion binding                                                                                                                                                                                                                                                                                                 |
| N | A4Y2P4 | DR | protein import                                                                                                                                                                                                                                                                                                    |
| N | A4Y2P4 | DR | protein targeting                                                                                                                                                                                                                                                                                                 |
| N | A4Y2P4 | DR | transmembrane transport                                                                                                                                                                                                                                                                                           |
| N | A4YBF5 | CC | Site-specific tyrosine recombinase, which acts by catalyzing the cutting and rejoining of the recombining DNA molecules                                                                                                                                                                                           |
| N | A4YBF5 | CC | It also contributes to the segregational stability of plasmids (By similarity).                                                                                                                                                                                                                                   |
| N | A4YBF5 | CC | The xerC-xerD complex is essential to convert dimers of the bacterial chromosome into monomers to permit their segregation at cell division                                                                                                                                                                       |
| N | A4YBF5 | DE | Tyrosine recombinase xerC;                                                                                                                                                                                                                                                                                        |
| N | A4YBF5 | DR | DNA integration                                                                                                                                                                                                                                                                                                   |
| N | A4YBF5 | DR | DNA recombination                                                                                                                                                                                                                                                                                                 |
| N | A4YBF5 | DR | cell division                                                                                                                                                                                                                                                                                                     |
| N | A4YBF5 | DR | chromosome segregation                                                                                                                                                                                                                                                                                            |
| N | A4YBX9 | CC | Protein S19 forms a complex with S13 that binds strongly to the 16S ribosomal RNA (By similarity).                                                                                                                                                                                                                |
| N | A4YBX9 | DE | 30S ribosomal protein S19;                                                                                                                                                                                                                                                                                        |
| N | A4YBX9 | DR | structural constituent of ribosome                                                                                                                                                                                                                                                                                |
| N | A4YVC7 | DE | 2-dehydro-3-deoxyphosphooctonate aldolase;                                                                                                                                                                                                                                                                        |
| N | A4YVC7 | DE | 3-deoxy-D-manno-octulosonic acid 8-phosphate synthase;                                                                                                                                                                                                                                                            |
| N | A4YVC7 | DE | KDO 8-P synthase;                                                                                                                                                                                                                                                                                                 |
| N | A4YVC7 | DE | KDO-8-phosphate synthase;                                                                                                                                                                                                                                                                                         |
| N | A4YVC7 | DE | Phospho-2-dehydro-3-deoxyoctonate aldolase;                                                                                                                                                                                                                                                                       |
| N | A4YVC7 | DR | 3-deoxy-8-phosphooctulonate synthase activity                                                                                                                                                                                                                                                                     |
| N | A4YVC7 | DR | lipopolysaccharide biosynthetic process                                                                                                                                                                                                                                                                           |
| N | A5CES0 | CC | NDH-1 shuttles electrons from NADH, via FMN and iron- sulfur (Fe-S) centers, to quinones in the respiratory chain                                                                                                                                                                                                 |
| N | A5CES0 | CC | Couples the redox reaction to proton translocation (for every two electrons transferred, four hydrogen ions are translocated across the cytoplasmic membrane), and thus conserves the redox energy in a proton gradient (By similarity)                                                                           |
| N | A5CES0 | DE | NADH dehydrogenase I subunit B;                                                                                                                                                                                                                                                                                   |
| N | A5CES0 | DE | NADH-quinone oxidoreductase subunit B;                                                                                                                                                                                                                                                                            |
| N | A5CES0 | DE | NDH-1 subunit B;                                                                                                                                                                                                                                                                                                  |
| N | A5CES0 | DR | 4 iron, 4 sulfur cluster binding                                                                                                                                                                                                                                                                                  |
| N | A5CES0 | DR | NADH dehydrogenase (ubiquinone) activity                                                                                                                                                                                                                                                                          |
| N | A5CES0 | DR | metal ion binding                                                                                                                                                                                                                                                                                                 |
| N | A5CES0 | DR | oxidation-reduction process                                                                                                                                                                                                                                                                                       |
| N | A5CES0 | DR | quinone binding                                                                                                                                                                                                                                                                                                   |
| N | A5CW34 | CC | Tetrapolymerization of the monopyrrole PBG into the hydroxymethylbilane pre-uroporphyrinogen in several discrete steps (By similarity).                                                                                                                                                                           |
| N | A5CW34 | DE | Hydroxymethylbilane synthase;                                                                                                                                                                                                                                                                                     |
| N | A5CW34 | DE | Porphobilinogen deaminase;                                                                                                                                                                                                                                                                                        |
| N | A5CW34 | DE | Pre-uroporphyrinogen synthase;                                                                                                                                                                                                                                                                                    |
| N | A5CW34 | DR | hydroxymethylbilane synthase activity                                                                                                                                                                                                                                                                             |
| N | A5CW34 | DR | peptidyl-pyrromethane cofactor linkage                                                                                                                                                                                                                                                                            |
| N | A5CW34 | DR | porphyrin biosynthetic process                                                                                                                                                                                                                                                                                    |
| N | A5CXG4 | CC | NDH-1 shuttles electrons from NADH, via FMN and iron- sulfur (Fe-S) centers, to quinones in the respiratory chain                                                                                                                                                                                                 |

|   |        |    |                                                                                                                                                                                                                                                                                                                                     |
|---|--------|----|-------------------------------------------------------------------------------------------------------------------------------------------------------------------------------------------------------------------------------------------------------------------------------------------------------------------------------------|
| N | A5CXG4 | CC | Couples the redox reaction to proton translocation (for every two electrons transferred, four hydrogen ions are translocated across the cytoplasmic membrane), and thus conserves the redox energy in a proton gradient                                                                                                             |
| N | A5CXG4 | CC | The immediate electron acceptor for the enzyme in this species is believed to be ubiquinone                                                                                                                                                                                                                                         |
| N | A5CXG4 | CC | This subunit may bind ubiquinone (By similarity).                                                                                                                                                                                                                                                                                   |
| N | A5CXG4 | DE | NADH dehydrogenase I subunit H;                                                                                                                                                                                                                                                                                                     |
| N | A5CXG4 | DE | NADH-quinone oxidoreductase subunit H;                                                                                                                                                                                                                                                                                              |
| N | A5CXG4 | DE | NDH-1 subunit H;                                                                                                                                                                                                                                                                                                                    |
| N | A5CXG4 | DR | NADH dehydrogenase (quinone) activity                                                                                                                                                                                                                                                                                               |
| N | A5CXG4 | DR | oxidation-reduction process                                                                                                                                                                                                                                                                                                         |
| N | A5CXG4 | DR | quinone binding                                                                                                                                                                                                                                                                                                                     |
| N | A5CXR1 | CC | Catalyzes the phosphorylation of the position 2 hydroxy group of 4-diphosphocytidyl-2C-methyl-D-erythritol (By similarity).                                                                                                                                                                                                         |
| N | A5CXR1 | DE | 4-(cytidine-5'-diphospho)-2-C-methyl-D-erythritol kinase;                                                                                                                                                                                                                                                                           |
| N | A5CXR1 | DE | 4-diphosphocytidyl-2-C-methyl-D-erythritol kinase;                                                                                                                                                                                                                                                                                  |
| N | A5CXR1 | DR | 4-(cytidine 5'-diphospho)-2-C-methyl-D-erythritol kinase activity                                                                                                                                                                                                                                                                   |
| N | A5CXR1 | DR | terpenoid biosynthetic process                                                                                                                                                                                                                                                                                                      |
| N | A5D3L5 | CC | Tetrapolymerization of the monopyrrole PBG into the hydroxymethylbilane pre-uroporphyrinogen in several discrete steps (By similarity).                                                                                                                                                                                             |
| N | A5D3L5 | DE | Hydroxymethylbilane synthase;                                                                                                                                                                                                                                                                                                       |
| N | A5D3L5 | DE | Porphobilinogen deaminase;                                                                                                                                                                                                                                                                                                          |
| N | A5D3L5 | DE | Pre-uroporphyrinogen synthase;                                                                                                                                                                                                                                                                                                      |
| N | A5D3L5 | DR | hydroxymethylbilane synthase activity                                                                                                                                                                                                                                                                                               |
| N | A5D3L5 | DR | peptidyl-pyrromethane cofactor linkage                                                                                                                                                                                                                                                                                              |
| N | A5D3L5 | DR | porphyrin biosynthetic process                                                                                                                                                                                                                                                                                                      |
| N | A5D3W7 | CC | Involved in DNA repair and recF pathway recombination (By similarity).                                                                                                                                                                                                                                                              |
| N | A5D3W7 | DE | DNA repair protein recO;                                                                                                                                                                                                                                                                                                            |
| N | A5D3W7 | DE | Recombination protein O;                                                                                                                                                                                                                                                                                                            |
| N | A5D3W7 | DR | ARF GTPase activator activity                                                                                                                                                                                                                                                                                                       |
| N | A5D3W7 | DR | DNA recombination                                                                                                                                                                                                                                                                                                                   |
| N | A5D3W7 | DR | regulation of ARF GTPase activity                                                                                                                                                                                                                                                                                                   |
| N | A5D3W7 | DR | zinc ion binding                                                                                                                                                                                                                                                                                                                    |
| N | A5D7C3 | CC | Mediates homophilic cell-cell adhesion (By similarity).                                                                                                                                                                                                                                                                             |
| N | A5D7C3 | DE | Myelin protein zero-like protein 3;                                                                                                                                                                                                                                                                                                 |
| N | A5D7C3 | DR | cell adhesion                                                                                                                                                                                                                                                                                                                       |
| N | A5D7F6 | CC | Acts as a transcriptional coactivator for NOTCH proteins                                                                                                                                                                                                                                                                            |
| N | A5D7F6 | CC | Has been shown to amplify NOTCH-induced transcription of HES1                                                                                                                                                                                                                                                                       |
| N | A5D7F6 | CC | Potentiates activation by NOTCH3 and NOTCH4 more efficiently than MAML1 or MAML3 (By similarity).                                                                                                                                                                                                                                   |
| N | A5D7F6 | DE | Mastermind-like protein 2;                                                                                                                                                                                                                                                                                                          |
| N | A5D7F6 | DR | Notch signaling pathway                                                                                                                                                                                                                                                                                                             |
| N | A5D9D4 | CC | Involved in the regulation of mitochondrial distribution and morphology (By similarity)                                                                                                                                                                                                                                             |
| N | A5D9D4 | DE | Protein misato homolog 1;                                                                                                                                                                                                                                                                                                           |
| N | A5D9D4 | DR | mitochondrion distribution                                                                                                                                                                                                                                                                                                          |
| N | A5D9D4 | DR | protein polymerization                                                                                                                                                                                                                                                                                                              |
| N | A5DDB7 | CC | Negative regulator of transcription elongation (By similarity).                                                                                                                                                                                                                                                                     |
| N | A5DDB7 | DE | Transcription factor BYE1;                                                                                                                                                                                                                                                                                                          |
| N | A5DDB7 | DR | zinc ion binding                                                                                                                                                                                                                                                                                                                    |
| N | A5DJX5 | CC | Positively regulates the activity of the minus-end directed microtubule motor protein dynein                                                                                                                                                                                                                                        |
| N | A5DJX5 | CC | Plays a central role in positioning the mitotic spindle at the bud neck during cell division                                                                                                                                                                                                                                        |
| N | A5DJX5 | CC | Targets cytoplasmic dynein to microtubule plus ends, thereby promoting dynein-mediated microtubule sliding along the bud cortex and consequently the movement of the mitotic spindle to the bud neck (By similarity).                                                                                                               |
| N | A5DJX5 | DE | Lissencephaly-1 homolog;                                                                                                                                                                                                                                                                                                            |
| N | A5DJX5 | DE | Nuclear distribution protein PAC1;                                                                                                                                                                                                                                                                                                  |
| N | A5DJX5 | DE | nudF homolog;                                                                                                                                                                                                                                                                                                                       |
| N | A5DJX5 | DR | cell division                                                                                                                                                                                                                                                                                                                       |
| N | A5DUA7 | CC | Biunctional enzyme that catalyzes the enolization of 2,5-diketo-5-methylthiopentyl-1-phosphate (DK-MTP-1-P) into the intermediate 2-hydroxy-3-keto-5-methylthiopentenyl-1-phosphate (HK-MTPenyl-1-P), which is then dephosphorylated to form the acireductone 1,2-dihydroxy-3-keto-5-methylthiopentane (DHK-MTPene) (By similarity) |
| N | A5DUA7 | DE | 2,3-diketo-5-methylthio-1-phosphopentane phosphatase;                                                                                                                                                                                                                                                                               |
| N | A5DUA7 | DE | Enolase-phosphatase E1;                                                                                                                                                                                                                                                                                                             |

|   |        |    |                                                                                                                                                                                                                                                                                                           |
|---|--------|----|-----------------------------------------------------------------------------------------------------------------------------------------------------------------------------------------------------------------------------------------------------------------------------------------------------------|
| N | A5DUA7 | DR | L-methionine salvage from methylthioadenosine                                                                                                                                                                                                                                                             |
| N | A5DUA7 | DR | acireductone synthase activity                                                                                                                                                                                                                                                                            |
| N | A5DUA7 | DR | metal ion binding                                                                                                                                                                                                                                                                                         |
| N | A5E8J0 | CC | negative regulator of class I heat shock genes (grpe- unak-unaj and groELs operons)                                                                                                                                                                                                                       |
| N | A5E8J0 | CC | Prevents heat-shock induction of these operons (By similarity).                                                                                                                                                                                                                                           |
| N | A5E8J0 | DE | Heat-inducible transcription repressor hrcA;                                                                                                                                                                                                                                                              |
| N | A5E8J0 | DR | regulation of transcription, DNA-dependent                                                                                                                                                                                                                                                                |
| N | A5E8J0 | DR | response to stress                                                                                                                                                                                                                                                                                        |
| N | A5ELN9 | DE | 50S ribosomal protein L10;                                                                                                                                                                                                                                                                                |
| N | A5ELN9 | DR | ribosome biogenesis                                                                                                                                                                                                                                                                                       |
| N | A5ELN9 | DR | structural constituent of ribosome                                                                                                                                                                                                                                                                        |
| N | A5EV42 | DE | Glycine--tRNA ligase alpha subunit;                                                                                                                                                                                                                                                                       |
| N | A5EV42 | DE | Glycyl-tRNA synthetase alpha subunit;                                                                                                                                                                                                                                                                     |
| N | A5EV42 | DR | glycine-tRNA ligase activity                                                                                                                                                                                                                                                                              |
| N | A5EV42 | DR | glycyl-tRNA aminoacylation                                                                                                                                                                                                                                                                                |
| N | A5EVB5 | DE | High frequency lysogenization protein hflD homolog;<br>Excises uracil residues from the DNA which can arise as a result of                                                                                                                                                                                |
| N | A5EVB8 | CC | misincorporation of dUMP residues by DNA polymerase or due to deamination of cytosine (By similarity)                                                                                                                                                                                                     |
| N | A5EVB8 | DE | Uracil-DNA glycosylase;                                                                                                                                                                                                                                                                                   |
| N | A5EVB8 | DR | base-excision repair                                                                                                                                                                                                                                                                                      |
| N | A5EVB8 | DR | uracil DNA N-glycosylase activity                                                                                                                                                                                                                                                                         |
| N | A5EX94 | CC | DNA-dependent RNA polymerase catalyzes the transcription of DNA into RNA using the four ribonucleoside triphosphates as substrates.                                                                                                                                                                       |
| N | A5EX94 | DE | DNA-directed RNA polymerase subunit alpha;                                                                                                                                                                                                                                                                |
| N | A5EX94 | DE | RNA polymerase subunit alpha;                                                                                                                                                                                                                                                                             |
| N | A5EX94 | DE | RNAP subunit alpha;                                                                                                                                                                                                                                                                                       |
| N | A5EX94 | DE | Transcriptase subunit alpha;                                                                                                                                                                                                                                                                              |
| N | A5EX94 | DR | DNA-directed RNA polymerase activity                                                                                                                                                                                                                                                                      |
| N | A5EX94 | DR | protein dimerization activity                                                                                                                                                                                                                                                                             |
| N | A5EXA5 | CC | Involved in rRNA and/or ribosome maturation and assembly                                                                                                                                                                                                                                                  |
| N | A5EXA5 | CC | May have metal-dependent hydrolase activity (By similarity).                                                                                                                                                                                                                                              |
| N | A5EXA5 | CC | Required for normal 5' and 3' processing of 16S, 23S and 5S rRNAs                                                                                                                                                                                                                                         |
| N | A5EXA5 | DE | Probable rRNA maturation factor;                                                                                                                                                                                                                                                                          |
| N | A5EXA5 | DR | metal ion binding                                                                                                                                                                                                                                                                                         |
| N | A5EXA5 | DR | metalloendopeptidase activity                                                                                                                                                                                                                                                                             |
| N | A5EXA5 | DR | rRNA processing                                                                                                                                                                                                                                                                                           |
| N | A5F3H1 | CC | Transfers and isomerizes the ribose moiety from AdoMet to the 7-aminomethyl group of 7-deazaguanine (preQ1-tRNA) to give epoxyqueuosine (oQ-tRNA) (By similarity)                                                                                                                                         |
| N | A5F3H1 | DE | Queuosine biosynthesis protein queA;                                                                                                                                                                                                                                                                      |
| N | A5F3H1 | DE | S-adenosylmethionine:tRNA ribosyltransferase-isomerase;                                                                                                                                                                                                                                                   |
| N | A5F3H1 | DR | isomerase activity                                                                                                                                                                                                                                                                                        |
| N | A5F3H1 | DR | queuosine biosynthetic process                                                                                                                                                                                                                                                                            |
| N | A5F3H1 | DR | transferase activity                                                                                                                                                                                                                                                                                      |
| N | A5F3P3 | DE | 50S ribosomal protein L10;                                                                                                                                                                                                                                                                                |
| N | A5F3P3 | DR | ribosome biogenesis                                                                                                                                                                                                                                                                                       |
| N | A5F3P3 | DR | structural constituent of ribosome                                                                                                                                                                                                                                                                        |
| N | A5F3R3 | CC | Conversion of pppGpp to ppGpp                                                                                                                                                                                                                                                                             |
| N | A5F3R3 | CC | Guanosine pentaphosphate (pppGpp) is a cytoplasmic signaling molecule which together with ppGpp controls the "stringent response", an adaptive process that allows bacteria to respond to amino acid starvation, resulting in the coordinated regulation of numerous cellular activities (By similarity). |
| N | A5F3R3 | DE | Guanosine pentaphosphate phosphohydrolase;                                                                                                                                                                                                                                                                |
| N | A5F3R3 | DE | Guanosine-5'-triphosphate,3'-diphosphate pyrophosphatase;                                                                                                                                                                                                                                                 |
| N | A5F3R3 | DE | pppGpp-5'-phosphohydrolase;                                                                                                                                                                                                                                                                               |
| N | A5F3R3 | DR | guanosine-5'-triphosphate,3'-diphosphate diphosphatase activity                                                                                                                                                                                                                                           |
| N | A5F3Z4 | CC | Catalyzes the interconversion between ADP-D-glycero- beta-D-manno-heptose and ADP-L-glycero-beta-D-manno-heptose via an epimerization at carbon 6 of the heptose (By similarity).                                                                                                                         |
| N | A5F3Z4 | DE | ADP-L-glycero-D-manno-heptose-6-epimerase;                                                                                                                                                                                                                                                                |
| N | A5F3Z4 | DE | ADP-L-glycero-beta-D-manno-heptose-6-epimerase;                                                                                                                                                                                                                                                           |
| N | A5F3Z4 | DE | ADP-glyceromanno-heptose 6-epimerase;                                                                                                                                                                                                                                                                     |
| N | A5F3Z4 | DE | ADP-hep 6-epimerase;                                                                                                                                                                                                                                                                                      |
| N | A5F3Z4 | DR | ADP-glyceromanno-heptose 6-epimerase activity                                                                                                                                                                                                                                                             |
| N | A5F3Z4 | DR | carbohydrate metabolic process                                                                                                                                                                                                                                                                            |
| N | A5F3Z4 | DR | cellular metabolic process                                                                                                                                                                                                                                                                                |

|   |        |    |                                                                                                                                                                                                                  |
|---|--------|----|------------------------------------------------------------------------------------------------------------------------------------------------------------------------------------------------------------------|
| N | A5F475 | CC | F(1)F(0) ATP synthase produces ATP from ADP in the presence of a proton or sodium gradient                                                                                                                       |
| N | A5F475 | CC | During catalysis, ATP synthesis in the catalytic domain of F(1) is coupled via a rotary mechanism of the central stalk subunits to proton translocation (By similarity)                                          |
| N | A5F475 | CC | F-type ATPases consist of two structural domains, F(1) containing the extramembraneous catalytic core and F(0) containing the membrane proton channel, linked together by a central stalk and a peripheral stalk |
| N | A5F475 | DE | ATP synthase F(0) sector subunit b;                                                                                                                                                                              |
| N | A5F475 | DE | ATP synthase subunit b;                                                                                                                                                                                          |
| N | A5F475 | DE | ATPase subunit I;                                                                                                                                                                                                |
| N | A5F475 | DE | F-ATPase subunit b;                                                                                                                                                                                              |
| N | A5F475 | DE | F-type ATPase subunit b;                                                                                                                                                                                         |
| N | A5F475 | DR | ATP synthesis coupled proton transport                                                                                                                                                                           |
| N | A5F475 | DR | hydrogen ion transmembrane transporter activity                                                                                                                                                                  |
| N | A5F5B4 | CC | Cell wall formation                                                                                                                                                                                              |
| N | A5F5B4 | CC | Adds enolpyruvyl to UDP-N- acetylglucosamine (By similarity).                                                                                                                                                    |
| N | A5F5B4 | DE | Enolpyruvate transferase;                                                                                                                                                                                        |
| N | A5F5B4 | DE | UDP-N-acetylglucosamine 1-carboxyvinyltransferase;                                                                                                                                                               |
| N | A5F5B4 | DE | UDP-N-acetylglucosamine enolpyruvyl transferase;                                                                                                                                                                 |
| N | A5F5B4 | DR | UDP-N-acetylgalactosamine biosynthetic process                                                                                                                                                                   |
| N | A5F5B4 | DR | UDP-N-acetylglucosamine 1-carboxyvinyltransferase activity                                                                                                                                                       |
| N | A5F5B4 | DR | cell division                                                                                                                                                                                                    |
| N | A5F5B4 | DR | cellular cell wall organization                                                                                                                                                                                  |
| N | A5F5B4 | DR | peptidoglycan biosynthetic process                                                                                                                                                                               |
| N | A5F5B4 | DR | regulation of cell shape                                                                                                                                                                                         |
| N | A5F5F3 | CC | Folate-binding protein involved in regulating the level of ATP-dnaA and in the modification of some tRNAs                                                                                                        |
| N | A5F5F3 | CC | It is probably a key factor in regulatory networks that act via tRNA modification, such as initiation of chromosomal replication (By similarity).                                                                |
| N | A5F5F3 | DE | tRNA-modifying protein ygfZ;                                                                                                                                                                                     |
| N | A5F5F3 | DR | aminomethyltransferase activity                                                                                                                                                                                  |
| N | A5F5F3 | DR | folic acid binding                                                                                                                                                                                               |
| N | A5F5F3 | DR | glycine catabolic process                                                                                                                                                                                        |
| N | A5F5F3 | DR | tRNA processing                                                                                                                                                                                                  |
| N | A5FEF4 | CC | Interconversion of serine and glycine (By similarity).                                                                                                                                                           |
| N | A5FEF4 | DE | Serine hydroxymethyltransferase;                                                                                                                                                                                 |
| N | A5FEF4 | DE | Serine methylase;                                                                                                                                                                                                |
| N | A5FEF4 | DR | L-serine metabolic process                                                                                                                                                                                       |
| N | A5FEF4 | DR | glycine hydroxymethyltransferase activity                                                                                                                                                                        |
| N | A5FEF4 | DR | glycine metabolic process                                                                                                                                                                                        |
| N | A5FEF4 | DR | one-carbon metabolic process                                                                                                                                                                                     |
| N | A5FEF4 | DR | pyridoxal phosphate binding                                                                                                                                                                                      |
| N | A5FGL1 | CC | Acts as a chaperone (By similarity).                                                                                                                                                                             |
| N | A5FGL1 | DE | Chaperone protein DnaK;                                                                                                                                                                                          |
| N | A5FGL1 | DE | Heat shock 70 kDa protein;                                                                                                                                                                                       |
| N | A5FGL1 | DE | Heat shock protein 70;                                                                                                                                                                                           |
| N | A5FGL1 | DR | protein folding                                                                                                                                                                                                  |
| N | A5FGL1 | DR | response to stress                                                                                                                                                                                               |
| N | A5FGL1 | DR | unfolded protein binding                                                                                                                                                                                         |
| N | A5FIJ4 | CC | DNA-dependent RNA polymerase catalyzes the transcription of DNA into RNA using the four ribonucleoside triphosphates as substrates (By similarity).                                                              |
| N | A5FIJ4 | DE | DNA-directed RNA polymerase subunit beta';                                                                                                                                                                       |
| N | A5FIJ4 | DE | RNA polymerase subunit beta';                                                                                                                                                                                    |
| N | A5FIJ4 | DE | RNAP subunit beta';                                                                                                                                                                                              |
| N | A5FIJ4 | DE | Transcriptase subunit beta';                                                                                                                                                                                     |
| N | A5FIJ4 | DR | DNA-directed RNA polymerase activity                                                                                                                                                                             |
| N | A5FIJ9 | CC | This protein promotes the GTP-dependent binding of aminoacyl-tRNA to the A-site of ribosomes during protein biosynthesis (By similarity).                                                                        |
| N | A5FIJ9 | DE | Elongation factor Tu;                                                                                                                                                                                            |
| N | A5FIJ9 | DR | GTPase activity                                                                                                                                                                                                  |
| N | A5FIJ9 | DR | translation elongation factor activity                                                                                                                                                                           |
| N | A5FQS4 | CC | Plays an important role in the de novo pathway of purine nucleotide biosynthesis                                                                                                                                 |
| N | A5FQS4 | CC | Catalyzes the first committed step in the biosynthesis of AMP from IMP (By similarity)                                                                                                                           |
| N | A5FQS4 | DE | Adenylosuccinate synthetase;                                                                                                                                                                                     |
| N | A5FQS4 | DE | IMP--aspartate ligase;                                                                                                                                                                                           |



|   |        |    |                                                                                                                                                                                                                                         |
|---|--------|----|-----------------------------------------------------------------------------------------------------------------------------------------------------------------------------------------------------------------------------------------|
| N | A5FQS4 | DR | adenylosuccinate synthase activity                                                                                                                                                                                                      |
| N | A5FQS4 | DR | magnesium ion binding                                                                                                                                                                                                                   |
| N | A5FQS4 | DR | purine nucleotide biosynthetic process                                                                                                                                                                                                  |
| N | A5FRQ3 | CC | Produces ATP from ADP in the presence of a proton gradient across the membrane                                                                                                                                                          |
| N | A5FRQ3 | CC | The alpha chain is a regulatory subunit (By similarity).                                                                                                                                                                                |
| N | A5FRQ3 | DE | ATP synthase F1 sector subunit alpha;                                                                                                                                                                                                   |
| N | A5FRQ3 | DE | ATP synthase subunit alpha;                                                                                                                                                                                                             |
| N | A5FRQ3 | DE | F-ATPase subunit alpha;                                                                                                                                                                                                                 |
| N | A5FRQ3 | DR | ATP hydrolysis coupled proton transport                                                                                                                                                                                                 |
| N | A5FRQ3 | DR | ATP synthesis coupled proton transport                                                                                                                                                                                                  |
| N | A5FRQ3 | DR | hydrogen ion transporting ATP synthase activity, rotational mechanism                                                                                                                                                                   |
| N | A5FRQ3 | DR | proton-transporting ATPase activity, rotational mechanism                                                                                                                                                                               |
| N | A5FX21 | CC | NDH-1 shuttles electrons from NADH, via FMN and iron- sulfur (Fe-S) centers, to quinones in the respiratory chain                                                                                                                       |
| N | A5FX21 | CC | Couples the redox reaction to proton translocation (for every two electrons transferred, four hydrogen ions are translocated across the cytoplasmic membrane), and thus conserves the redox energy in a proton gradient (By similarity) |
| N | A5FX21 | CC | The immediate electron acceptor for the enzyme in this species is believed to be ubiquinone                                                                                                                                             |
| N | A5FX21 | DE | NADH dehydrogenase I subunit N 1;                                                                                                                                                                                                       |
| N | A5FX21 | DE | NADH-quinone oxidoreductase subunit N 1;                                                                                                                                                                                                |
| N | A5FX21 | DE | NDH-1 subunit N 1;                                                                                                                                                                                                                      |
| N | A5FX21 | DR | ATP synthesis coupled electron transport                                                                                                                                                                                                |
| N | A5FX21 | DR | NADH dehydrogenase (ubiquinone) activity                                                                                                                                                                                                |
| N | A5FX21 | DR | quinone binding                                                                                                                                                                                                                         |
| N | A5FYE1 | DE | Imidazoleglycerol-phosphate dehydratase;                                                                                                                                                                                                |
| N | A5FYE1 | DR | histidine biosynthetic process                                                                                                                                                                                                          |
| N | A5FYE1 | DR | imidazoleglycerol-phosphate dehydratase activity                                                                                                                                                                                        |
| N | A5G962 | CC | Catalyzes the synthesis of alpha-ribazole-5-phosphate from nicotinate mononucleotide (NAMN) and 5,6- dimethylbenzimidazole (DMB) (By similarity)                                                                                        |
| N | A5G962 | DE | N(1)-alpha-phosphoribosyltransferase;                                                                                                                                                                                                   |
| N | A5G962 | DE | NN:DBI PRT;                                                                                                                                                                                                                             |
| N | A5G962 | DE | Nicotinate-nucleotide--dimethylbenzimidazole phosphoribosyltransferase;                                                                                                                                                                 |
| N | A5G962 | DR | cobalamin biosynthetic process                                                                                                                                                                                                          |
| N | A5G962 | DR | nicotinate-nucleotide-dimethylbenzimidazole phosphoribosyltransferase activity                                                                                                                                                          |
| N | A5G962 | DR | nucleoside biosynthetic process                                                                                                                                                                                                         |
| N | A5GBW0 | DE | UPF0234 protein Gura_0717;                                                                                                                                                                                                              |
| N | A5GC19 | CC | Plays an important role in the de novo pathway of purine nucleotide biosynthesis                                                                                                                                                        |
| N | A5GC19 | CC | Catalyzes the first committed step in the biosynthesis of AMP from IMP (By similarity)                                                                                                                                                  |
| N | A5GC19 | DE | Adenylosuccinate synthetase;                                                                                                                                                                                                            |
| N | A5GC19 | DE | IMP--aspartate ligase;                                                                                                                                                                                                                  |
| N | A5GC19 | DR | adenylosuccinate synthase activity                                                                                                                                                                                                      |
| N | A5GC19 | DR | magnesium ion binding                                                                                                                                                                                                                   |
| N | A5GC19 | DR | purine nucleotide biosynthetic process                                                                                                                                                                                                  |
| N | A5GIT9 | CC | Binds the lower part of the 30S subunit head                                                                                                                                                                                            |
| N | A5GIT9 | CC | Binds mRNA in the 70S ribosome, positioning it for translation (By similarity).                                                                                                                                                         |
| N | A5GIT9 | DE | 30S ribosomal protein S3;                                                                                                                                                                                                               |
| N | A5GIT9 | DR | structural constituent of ribosome                                                                                                                                                                                                      |
| N | A5GJP1 | CC | NDH-1 shuttles electrons from an unknown electron donor, via FMN and iron-sulfur (Fe-S) centers, to quinones in the respiratory and/or the photosynthetic chain                                                                         |
| N | A5GJP1 | CC | Couples the redox reaction to proton translocation, and thus conserves the redox energy in a proton gradient                                                                                                                            |
| N | A5GJP1 | CC | Cyanobacterial NDH-1 also plays a role in inorganic carbon- concentration (By similarity).                                                                                                                                              |
| N | A5GJP1 | CC | The immediate electron acceptor for the enzyme in this species is believed to be plastoquinone                                                                                                                                          |
| N | A5GJP1 | DE | NAD(P)H dehydrogenase I subunit L;                                                                                                                                                                                                      |
| N | A5GJP1 | DE | NAD(P)H-quinone oxidoreductase subunit L;                                                                                                                                                                                               |
| N | A5GJP1 | DE | NDH-1 subunit L;                                                                                                                                                                                                                        |
| N | A5GJP1 | DR | oxidation-reduction process                                                                                                                                                                                                             |
| N | A5GJP1 | DR | oxidoreductase activity, acting on NADH or NADPH, quinone or similar compound as acceptor                                                                                                                                               |
| N | A5GJP1 | DR | quinone binding                                                                                                                                                                                                                         |

|   |        |    |                                                                                                                                                                                                                         |
|---|--------|----|-------------------------------------------------------------------------------------------------------------------------------------------------------------------------------------------------------------------------|
| N | A5GL22 | CC | Component of the cytochrome b6-f complex, which mediates electron transfer between photosystem II (PSII) and photosystem I (PSI), cyclic electron flow around PSI, and state transitions (By similarity).               |
| N | A5GL22 | DE | Cytochrome b6-f complex subunit 8;                                                                                                                                                                                      |
| N | A5GL22 | DE | Cytochrome b6-f complex subunit VIII;                                                                                                                                                                                   |
| N | A5GL22 | DE | Cytochrome b6-f complex subunit petN;                                                                                                                                                                                   |
| N | A5GL22 | DR | cytochrome complex assembly                                                                                                                                                                                             |
| N | A5GL22 | DR | electron transport chain                                                                                                                                                                                                |
| N | A5GL22 | DR | electron transporter, transferring electrons within cytochrome b6/f complex of photosystem II activity                                                                                                                  |
| N | A5GL22 | DR | photosynthesis                                                                                                                                                                                                          |
| N | A5GQA2 | DE | Histidine--tRNA ligase;                                                                                                                                                                                                 |
| N | A5GQA2 | DE | Histidyl-tRNA synthetase;                                                                                                                                                                                               |
| N | A5GQA2 | DR | histidine-tRNA ligase activity                                                                                                                                                                                          |
| N | A5GQA2 | DR | histidyl-tRNA aminoacylation                                                                                                                                                                                            |
| N | A5GR50 | CC | Catalyzes a trans-dehydration via an enolate intermediate (By similarity).                                                                                                                                              |
| N | A5GR50 | DE | 3-dehydroquinase;                                                                                                                                                                                                       |
| N | A5GR50 | DE | 3-dehydroquinone hydratase;                                                                                                                                                                                             |
| N | A5GR50 | DE | Type II DHQase;                                                                                                                                                                                                         |
| N | A5GR50 | DR | 3-dehydroquinone hydratase activity                                                                                                                                                                                     |
| N | A5GR50 | DR | aromatic amino acid family biosynthetic process                                                                                                                                                                         |
| N | A5I9H9 | CC | Oxygenase that introduces the hydroxyl group at carbon five of 2-nonaprenyl-3-methyl-6-methoxy-1,4-benzoquinol resulting in the formation of 2-nonaprenyl-3-methyl-5-hydroxy-6-methoxy-1,4-benzoquinol (By similarity). |
| N | A5I9H9 | DE | 2-nonaprenyl-3-methyl-6-methoxy-1,4-benzoquinol hydroxylase;                                                                                                                                                            |
| N | A5I9H9 | DE | 5-demethoxyubiquinone hydroxylase;                                                                                                                                                                                      |
| N | A5I9H9 | DE | DMQ hydroxylase;                                                                                                                                                                                                        |
| N | A5I9H9 | DR | monooxygenase activity                                                                                                                                                                                                  |
| N | A5I9H9 | DR | oxidation-reduction process                                                                                                                                                                                             |
| N | A5I9H9 | DR | protein metabolic process                                                                                                                                                                                               |
| N | A5I9H9 | DR | transition metal ion binding                                                                                                                                                                                            |
| N | A5I9H9 | DR | ubiquinone biosynthetic process                                                                                                                                                                                         |
| N | A5ICZ5 | DE | UPF0341 protein LPC_1282;                                                                                                                                                                                               |
| N | A5IHR9 | CC | With S4 and S5 plays an important role in translational accuracy (By similarity).                                                                                                                                       |
| N | A5IHR9 | DE | 30S ribosomal protein S12;                                                                                                                                                                                              |
| N | A5IHR9 | DR | structural constituent of ribosome                                                                                                                                                                                      |
| N | A5IMA0 | CC | With S4 and S12 plays an important role in translational accuracy (By similarity).                                                                                                                                      |
| N | A5IMA0 | DE | 30S ribosomal protein S5;                                                                                                                                                                                               |
| N | A5IMA0 | DR | structural constituent of ribosome                                                                                                                                                                                      |
| N | A5ISE3 | CC | Responsible for the release of ribosomes from messenger RNA at the termination of protein biosynthesis                                                                                                                  |
| N | A5ISE3 | CC | May increase the efficiency of translation by recycling ribosomes from one round of translation to another (By similarity).                                                                                             |
| N | A5ISE3 | DE | Ribosome-recycling factor;                                                                                                                                                                                              |
| N | A5ISE3 | DE | Ribosome-releasing factor;                                                                                                                                                                                              |
| N | A5IU80 | DE | NH(3)-dependent NAD(+) synthetase;                                                                                                                                                                                      |
| N | A5IU80 | DR | NAD biosynthetic process                                                                                                                                                                                                |
| N | A5IU80 | DR | NAD+ synthase (glutamine-hydrolyzing) activity                                                                                                                                                                          |
| N | A5IU80 | DR | NAD+ synthase activity                                                                                                                                                                                                  |
| N | A5IVK3 | CC | Transforms pimelate into pimeloyl-CoA (By similarity).                                                                                                                                                                  |
| N | A5IVK3 | DE | 6-carboxyhexanoate--CoA ligase;                                                                                                                                                                                         |
| N | A5IVK3 | DE | Pimeloyl-CoA synthase;                                                                                                                                                                                                  |
| N | A5IVK3 | DR | 6-carboxyhexanoate-CoA ligase activity                                                                                                                                                                                  |
| N | A5IVK3 | DR | biotin biosynthetic process                                                                                                                                                                                             |
| N | A5IXT6 | CC | Catalyzes the folate-dependent formation of 5-methyl- uridine at position 54 (M-5-U54) in all tRNAs (By similarity).                                                                                                    |
| N | A5IXT6 | DE | Folate-dependent tRNA (uracil-5-)-methyltransferase;                                                                                                                                                                    |
| N | A5IXT6 | DE | Folate-dependent tRNA(M-5-U54)-methyltransferase;                                                                                                                                                                       |
| N | A5IXT6 | DE | Methylenetetrahydrofolate--tRNA-(uracil-5-)-methyltransferase TrmFO;                                                                                                                                                    |
| N | A5IXT6 | DR | flavin adenine dinucleotide binding                                                                                                                                                                                     |
| N | A5IXT6 | DR | methylenetetrahydrofolate-tRNA-(uracil-5-)-methyltransferase (FADH2-oxidizing) activity                                                                                                                                 |
| N | A5IXT6 | DR | tRNA processing                                                                                                                                                                                                         |
| N | A5N451 | CC | Exhibits a very high intrinsic GTPase hydrolysis rate                                                                                                                                                                   |

|   |        |    |                                                                                                                                                                                                                                                                                       |
|---|--------|----|---------------------------------------------------------------------------------------------------------------------------------------------------------------------------------------------------------------------------------------------------------------------------------------|
| N | A5N451 | CC | involved in the addition of a carboxymethylaminomethyl (cmnm) group at the wobble position (U34) of certain tRNAs, forming tRNA- cmnm(5)s(2)U34 (By similarity).                                                                                                                      |
| N | A5N451 | DE | tRNA modification GTPase mnmE;                                                                                                                                                                                                                                                        |
| N | A5N451 | DR | GTPase activity                                                                                                                                                                                                                                                                       |
| N | A5N451 | DR | metal ion binding                                                                                                                                                                                                                                                                     |
| N | A5N451 | DR | tRNA modification                                                                                                                                                                                                                                                                     |
| N | A5N4I4 | CC | Could be involved in septation (By similarity).                                                                                                                                                                                                                                       |
| N | A5N4I4 | DE | Putative septation protein spoVG;                                                                                                                                                                                                                                                     |
| N | A5N4I4 | DR | barrier septum formation                                                                                                                                                                                                                                                              |
| N | A5N4I4 | DR | sporulation resulting in formation of a cellular spore                                                                                                                                                                                                                                |
| N | A5N4S0 | CC | No specific function has so far been attributed to this initiation factor; however, it seems to stimulate more or less all the activities of the other two initiation factors IF-2 and IF-3                                                                                           |
| N | A5N4S0 | DE | Translation initiation factor IF-1;                                                                                                                                                                                                                                                   |
| N | A5N4S0 | DR | translation initiation factor activity                                                                                                                                                                                                                                                |
| N | A5N6A9 | DE | 3-phosphoshikimate 1-carboxyvinyltransferase;                                                                                                                                                                                                                                         |
| N | A5N6A9 | DE | 5-enolpyruvylshikimate-3-phosphate synthase;                                                                                                                                                                                                                                          |
| N | A5N6A9 | DE | EPSP synthase;                                                                                                                                                                                                                                                                        |
| N | A5N6A9 | DR | 3-phosphoshikimate 1-carboxyvinyltransferase activity                                                                                                                                                                                                                                 |
| N | A5N6A9 | DR | aromatic amino acid family biosynthetic process                                                                                                                                                                                                                                       |
| N | A5N7V5 | CC | Negatively regulates transcription of bacterial ribonucleotide reductase nrd genes and operons by binding to NrdR- boxes (By similarity).                                                                                                                                             |
| N | A5N7V5 | DE | Transcriptional repressor NrdR;                                                                                                                                                                                                                                                       |
| N | A5N7V5 | DR | transcription repressor activity                                                                                                                                                                                                                                                      |
| N | A5N7V5 | DR | zinc ion binding                                                                                                                                                                                                                                                                      |
| N | A5PJJ5 | DE | Leucine-rich repeat-containing protein 14;                                                                                                                                                                                                                                            |
| N | A5PJU6 | DE | Aminoglycoside phosphotransferase domain-containing protein 1;                                                                                                                                                                                                                        |
| N | A5PJU6 | DR | kinase activity                                                                                                                                                                                                                                                                       |
| N | A5PK16 | CC | Substrate recognition component of a SCF (SKP1-CUL1-F-box protein) E3 ubiquitin-protein ligase complex which mediates the ubiquitination and subsequent proteasomal degradation of CP110 during G2 phase, thereby acting as an inhibitor of centrosome reduplication (By similarity). |
| N | A5PK16 | DR | SCF-dependent proteasomal ubiquitin-dependent protein catabolic process                                                                                                                                                                                                               |
| N | A5PK16 | DR | cell division                                                                                                                                                                                                                                                                         |
| N | A5PK16 | DR | negative regulation of centrosome duplication                                                                                                                                                                                                                                         |
| N | A5PK16 | DR | protein ubiquitination                                                                                                                                                                                                                                                                |
| N | A5U030 | CC | Involved in the conversion of a cis-olefin into a trans-olefin with concomitant introduction of an allylic methyl branch at the proximal position of the precursor to both the methoxy and ketomycolic acids                                                                          |
| N | A5U030 | CC | It directly affects the cis- to trans ratio and indirectly affects the keto to methoxy ratio (By similarity).                                                                                                                                                                         |
| N | A5U030 | DE | Mycolic acid methyltransferase MmaA1;                                                                                                                                                                                                                                                 |
| N | A5U030 | DE | S-adenosylmethionine-dependent methyltransferase;                                                                                                                                                                                                                                     |
| N | A5U030 | DR | lipid biosynthetic process                                                                                                                                                                                                                                                            |
| N | A5U030 | DR | methyltransferase activity                                                                                                                                                                                                                                                            |
| N | A5U2R2 | CC | Seems to be involved in the anchoring of the catalytic components of the fumarate reductase complex to the cytoplasmic membrane (By similarity).                                                                                                                                      |
| N | A5U2R2 | DE | Fumarate reductase subunit D;                                                                                                                                                                                                                                                         |
| N | A5U2R2 | DR | fumarate metabolic process                                                                                                                                                                                                                                                            |
| N | A5U2V0 | CC | Catalyzes the condensation of iminoaspartate with dihydroxyacetone phosphate to form quinolinate (By similarity).                                                                                                                                                                     |
| N | A5U2V0 | DE | Quinolinate synthase A;                                                                                                                                                                                                                                                               |
| N | A5U2V0 | DR | 4 iron, 4 sulfur cluster binding                                                                                                                                                                                                                                                      |
| N | A5U2V0 | DR | NAD biosynthetic process                                                                                                                                                                                                                                                              |
| N | A5U2V0 | DR | metal ion binding                                                                                                                                                                                                                                                                     |
| N | A5U2V0 | DR | quinolinate synthetase A activity                                                                                                                                                                                                                                                     |
| N | A5U2V0 | DR | transferase activity, transferring alkyl or aryl (other than methyl) groups                                                                                                                                                                                                           |
| N | A5U313 | DE | Ornithine carbamoyltransferase;                                                                                                                                                                                                                                                       |
| N | A5U313 | DR | amino acid binding                                                                                                                                                                                                                                                                    |
| N | A5U313 | DR | arginine biosynthetic process                                                                                                                                                                                                                                                         |
| N | A5U313 | DR | ornithine carbamoyltransferase activity                                                                                                                                                                                                                                               |
| N | A5U871 | CC | Catalyzes the synthesis of GMP from XMP (By similarity).                                                                                                                                                                                                                              |
| N | A5U871 | DE | GMP synthase [glutamine-hydrolyzing];                                                                                                                                                                                                                                                 |
| N | A5U871 | DE | GMP synthetase;                                                                                                                                                                                                                                                                       |
| N | A5U871 | DE | Glutamine amidotransferase;                                                                                                                                                                                                                                                           |
| N | A5U871 | DR | GMP biosynthetic process                                                                                                                                                                                                                                                              |

|   |        |    |                                                                                                                                                                                           |
|---|--------|----|-------------------------------------------------------------------------------------------------------------------------------------------------------------------------------------------|
| N | A5U871 | DR | GMP synthase (glutamine-hydrolyzing) activity                                                                                                                                             |
| N | A5U871 | DR | glutamine metabolic process                                                                                                                                                               |
| N | A5UAB7 | DE | Histidine--tRNA ligase;                                                                                                                                                                   |
| N | A5UAB7 | DE | Histidyl-tRNA synthetase;                                                                                                                                                                 |
| N | A5UAB7 | DR | histidine-tRNA ligase activity                                                                                                                                                            |
| N | A5UAB7 | DR | histidyl-tRNA aminoacylation                                                                                                                                                              |
| N | A5UEV0 | DE | UPF0181 protein CGSHiGG_01050;                                                                                                                                                            |
| N | A5UEY9 | DE | UPF0268 protein CGSHiGG_01275;                                                                                                                                                            |
| N | A5UFF5 | CC | Required for insertion of 4Fe-4S clusters for at least ispG (By similarity).                                                                                                              |
| N | A5UFF5 | DE | Iron-sulfur cluster insertion protein erpA;                                                                                                                                               |
| N | A5UFF5 | DR | iron-sulfur cluster assembly                                                                                                                                                              |
| N | A5UFF5 | DR | iron-sulfur cluster binding                                                                                                                                                               |
| N | A5UFF5 | DR | metal ion binding                                                                                                                                                                         |
| N | A5UFF5 | DR | structural molecule activity                                                                                                                                                              |
| N | A5UHF7 | CC | non-essential, abundant cell division factor that is required for proper Z-ring formation                                                                                                 |
| N | A5UHF7 | CC | It is recruited early to the divisome by direct interaction with FtsZ, stimulating Z-ring assembly and thereby promoting cell division earlier in the cell cycle                          |
| N | A5UHF7 | CC | Its recruitment to the Z-ring requires functional FtsA or ZipA (By similarity).                                                                                                           |
| N | A5UHF7 | DE | Cell division protein ZapB;                                                                                                                                                               |
| N | A5UHF7 | DR | barrier septum formation                                                                                                                                                                  |
| N | A5UHF7 | DR | cytokinesis by binary fission                                                                                                                                                             |
| N | A5UHR4 | CC | Could be a mediator in iron transactions between iron acquisition and iron-requiring processes, such as synthesis and/or repair of Fe-S clusters in biosynthetic enzymes (By similarity). |
| N | A5UHR4 | DE | Probable Fe(2+)-trafficking protein;                                                                                                                                                      |
| N | A5UHR4 | DR | iron ion binding                                                                                                                                                                          |
| N | A5UI35 | DE | UPF0243 zinc-binding protein CGSHiGG_08005;                                                                                                                                               |
| N | A5UI35 | DR | regulation of transcription, DNA-dependent                                                                                                                                                |
| N | A5UI35 | DR | sequence-specific DNA binding transcription factor activity                                                                                                                               |
| N | A5UI35 | DR | zinc ion binding                                                                                                                                                                          |
| N | A5UIC3 | DE | UPF0246 protein CGSHiGG_08495;                                                                                                                                                            |
| N | A5UIY9 | CC | Forms oxaloacetate, a four-carbon dicarboxylic acid source for the tricarboxylic acid cycle.                                                                                              |
| N | A5UIY9 | DE | Phosphoenolpyruvate carboxylase;                                                                                                                                                          |
| N | A5UIY9 | DR | carbon fixation                                                                                                                                                                           |
| N | A5UIY9 | DR | phosphoenolpyruvate carboxylase activity                                                                                                                                                  |
| N | A5UIY9 | DR | tricarboxylic acid cycle                                                                                                                                                                  |
| N | A5UJ22 | CC | Plays a critical role in the incorporation of lipoproteins in the outer membrane after they are released by the lolA protein (By similarity).                                             |
| N | A5UJ22 | DE | Outer-membrane lipoprotein lolB;                                                                                                                                                          |
| N | A5UJ22 | DR | protein transport                                                                                                                                                                         |
| N | A5V5X4 | DE | 50S ribosomal protein L17;                                                                                                                                                                |
| N | A5V5X4 | DR | structural constituent of ribosome                                                                                                                                                        |
| N | A5V876 | CC | Involved in the tonB-independent uptake of proteins (By similarity).                                                                                                                      |
| N | A5V876 | DE | Protein tolB;                                                                                                                                                                             |
| N | A5V876 | DR | protein import                                                                                                                                                                            |
| N | A5VAC0 | CC | Responsible for the transport of dicarboxylates such as succinate, fumarate, and malate from the periplasm across the membrane (By similarity).                                           |
| N | A5VAC0 | DE | C4-dicarboxylate transport protein;                                                                                                                                                       |
| N | A5VAC0 | DR | carbohydrate transport                                                                                                                                                                    |
| N | A5VAC0 | DR | sodium:dicarboxylate symporter activity                                                                                                                                                   |
| N | A5VIL5 | DE | Glucose-6-phosphate isomerase;                                                                                                                                                            |
| N | A5VIL5 | DE | Phosphoglucose isomerase;                                                                                                                                                                 |
| N | A5VIL5 | DE | Phosphohexose isomerase;                                                                                                                                                                  |
| N | A5VIL5 | DR | gluconeogenesis                                                                                                                                                                           |
| N | A5VIL5 | DR | glucose-6-phosphate isomerase activity                                                                                                                                                    |
| N | A5VJA0 | CC | Zinc phosphodiesterase, which displays some tRNA 5'-processing endonuclease activity                                                                                                      |
| N | A5VJA0 | CC | Probably involved in tRNA maturation, by removing a 3'-trailer from precursor tRNA (By similarity).                                                                                       |
| N | A5VJA0 | DE | Ribonuclease Z;                                                                                                                                                                           |
| N | A5VJA0 | DE | tRNA 3' endonuclease;                                                                                                                                                                     |
| N | A5VJA0 | DR | endoribonuclease activity, producing 5'-phosphomonoesters                                                                                                                                 |
| N | A5VJA0 | DR | metal ion binding                                                                                                                                                                         |
| N | A5VJA0 | DR | tRNA 3'-trailer cleavage                                                                                                                                                                  |
| N | A5VKN9 | CC | Might take part in the signal recognition particle (SRP) pathway                                                                                                                          |

|   |        |    |                                                                                                                                                                                                                     |
|---|--------|----|---------------------------------------------------------------------------------------------------------------------------------------------------------------------------------------------------------------------|
| N | A5VKN9 | CC | May be a regulatory protein.                                                                                                                                                                                        |
| N | A5VKN9 | CC | This is inferred from the conservation of its genetic proximity to ftsY/ffh                                                                                                                                         |
| N | A5VKN9 | DE | UPF0122 protein Lreu_1156;                                                                                                                                                                                          |
| N | A5VKN9 | DR | regulation of transcription, DNA-dependent                                                                                                                                                                          |
| N | A5VKN9 | DR | sequence-specific DNA binding transcription factor activity                                                                                                                                                         |
| N | A5VKN9 | DR | sigma factor activity                                                                                                                                                                                               |
| N | A5VKN9 | DR | transcription initiation, DNA-dependent                                                                                                                                                                             |
| N | A5VKT4 | CC | Catalyzes the attachment of glutamate to tRNA(Glu) in a two-step reaction: glutamate is first activated by ATP to form Glu-AMP and then transferred to the acceptor end of tRNA(Glu) (By similarity).               |
| N | A5VKT4 | DE | Glutamate--tRNA ligase;                                                                                                                                                                                             |
| N | A5VKT4 | DE | Glutamyl-tRNA synthetase;                                                                                                                                                                                           |
| N | A5VKT4 | DR | glutamate-tRNA ligase activity                                                                                                                                                                                      |
| N | A5VKT4 | DR | glutamyl-tRNA aminoacylation                                                                                                                                                                                        |
| N | A5VP26 | CC | Binds as a heterodimer with protein S6 to the central domain of the 16S rRNA, where it helps stabilize the platform of the 30S subunit (By similarity).                                                             |
| N | A5VP26 | DE | 30S ribosomal protein S18;                                                                                                                                                                                          |
| N | A5VP26 | DR | structural constituent of ribosome                                                                                                                                                                                  |
| N | A5VSG4 | DE | 30S ribosomal protein S16;                                                                                                                                                                                          |
| N | A5VSG4 | DR | structural constituent of ribosome                                                                                                                                                                                  |
| N | A5VSU9 | DE | UPF0178 protein BOV_1904;                                                                                                                                                                                           |
| N | A5VSZ7 | CC | Component of the acetyl coenzyme A carboxylase (ACC) complex                                                                                                                                                        |
| N | A5VSZ7 | CC | First, biotin carboxylase catalyzes the carboxylation of biotin on its carrier protein (BCCP) and then the CO(2) group is transferred by the carboxyltransferase to acetyl-CoA to form malonyl-CoA (By similarity). |
| N | A5VSZ7 | DE | ACCase subunit alpha;                                                                                                                                                                                               |
| N | A5VSZ7 | DE | Acetyl-CoA carboxylase carboxyltransferase subunit alpha;                                                                                                                                                           |
| N | A5VSZ7 | DE | Acetyl-coenzyme A carboxylase carboxyl transferase subunit alpha;                                                                                                                                                   |
| N | A5VSZ7 | DR | acetyl-CoA carboxylase activity                                                                                                                                                                                     |
| N | A5VSZ7 | DR | fatty acid biosynthetic process                                                                                                                                                                                     |
| N | A5VT60 | CC | Component of the acetyl coenzyme A carboxylase (ACC) complex                                                                                                                                                        |
| N | A5VT60 | CC | Biotin carboxylase (BC) catalyzes the carboxylation of biotin on its carrier protein (BCCP) and then the CO(2) group is transferred by the transcarboxylase to acetyl-CoA to form malonyl-CoA (By similarity).      |
| N | A5VT60 | DE | ACCase subunit beta;                                                                                                                                                                                                |
| N | A5VT60 | DE | Acetyl-CoA carboxylase carboxyltransferase subunit beta;                                                                                                                                                            |
| N | A5VT60 | DE | Acetyl-coenzyme A carboxylase carboxyl transferase subunit beta;                                                                                                                                                    |
| N | A5VT60 | DR | acetyl-CoA carboxylase activity                                                                                                                                                                                     |
| N | A5VT60 | DR | fatty acid biosynthetic process                                                                                                                                                                                     |
| N | A5VZX1 | DE | Phosphoribosylaminoimidazole-succinocarboxamide synthase;                                                                                                                                                           |
| N | A5VZX1 | DE | SAICAR synthetase;                                                                                                                                                                                                  |
| N | A5VZX1 | DR | phosphoribosylaminoimidazolesuccinocarboxamide synthase activity                                                                                                                                                    |
| N | A5VZX1 | DR | purine nucleotide biosynthetic process                                                                                                                                                                              |
| N | A5W2C0 | CC | Catalyzes the hydrolysis of short-chain aliphatic amides to their corresponding organic acids with release of ammonia (By similarity).                                                                              |
| N | A5W2C0 | DE | Acylamide amidohydrolase;                                                                                                                                                                                           |
| N | A5W2C0 | DE | Aliphatic amidase;                                                                                                                                                                                                  |
| N | A5W2C0 | DR | amidase activity                                                                                                                                                                                                    |
| N | A5W2C0 | DR | nitrogen compound metabolic process                                                                                                                                                                                 |
| N | A5W488 | DE | UPF0145 protein Pput_2816;                                                                                                                                                                                          |
| N | A5W838 | CC | Involved in the biosynthesis of lipid A, a phosphorylated glycolipid that anchors the lipopolysaccharide to the outer membrane of the cell (By similarity).                                                         |
| N | A5W838 | DE | Acyl-[acyl-carrier-protein]--UDP-N-acetylglucosamine O-acyltransferase;                                                                                                                                             |
| N | A5W838 | DE | UDP-N-acetylglucosamine acyltransferase;                                                                                                                                                                            |
| N | A5W838 | DR | acyl-[acyl-carrier-protein]-UDP-N-acetylglucosamine O-acyltransferase activity                                                                                                                                      |
| N | A5W838 | DR | lipid A biosynthetic process                                                                                                                                                                                        |
| N | A5W8J7 | CC | Catalyzes the decarboxylation of oxaloacetate into pyruvate                                                                                                                                                         |
| N | A5W8J7 | CC | Seems to play a role in maintaining cellular concentrations of bicarbonate and pyruvate (By similarity).                                                                                                            |
| N | A5W8J7 | DE | Oxaloacetate decarboxylase;                                                                                                                                                                                         |
| N | A5W8J7 | DR | metal ion binding                                                                                                                                                                                                   |
| N | A5W8J7 | DR | oxaloacetate decarboxylase activity                                                                                                                                                                                 |
| N | A5WBA8 | CC | F(1)F(0) ATP synthase produces ATP from ADP in the presence of a proton or sodium gradient                                                                                                                          |

|   |        |    |                                                                                                                                                                                                                         |
|---|--------|----|-------------------------------------------------------------------------------------------------------------------------------------------------------------------------------------------------------------------------|
| N | A5WBA8 | CC | During catalysis, ATP synthesis in the catalytic domain of F(1) is coupled via a rotary mechanism of the central stalk subunits to proton translocation (By similarity).                                                |
| N | A5WBA8 | CC | F-type ATPases consist of two structural domains, F(1) containing the extramembraneous catalytic core and F(0) containing the membrane proton channel, linked together by a central stalk and a peripheral stalk        |
| N | A5WBA8 | DE | ATP synthase F(0) sector subunit c;                                                                                                                                                                                     |
| N | A5WBA8 | DE | ATP synthase subunit c;                                                                                                                                                                                                 |
| N | A5WBA8 | DE | F-ATPase subunit c;                                                                                                                                                                                                     |
| N | A5WBA8 | DE | F-type ATPase subunit c;                                                                                                                                                                                                |
| N | A5WBA8 | DE | Lipid-binding protein;                                                                                                                                                                                                  |
| N | A5WBA8 | DR | ATP hydrolysis coupled proton transport                                                                                                                                                                                 |
| N | A5WBA8 | DR | ATP synthesis coupled proton transport                                                                                                                                                                                  |
| N | A5WBA8 | DR | hydrogen ion transmembrane transporter activity                                                                                                                                                                         |
| N | A5WBA8 | DR | lipid binding                                                                                                                                                                                                           |
| N | A5WBB7 | CC | Required for the insertion of integral membrane proteins into the membrane                                                                                                                                              |
| N | A5WBB7 | CC | Involved in integration of membrane proteins that insert dependently and independently of the Sec translocase complex (By similarity).                                                                                  |
| N | A5WBB7 | CC | Probably plays an essential role in the integration of proteins of the respiratory chain complexes                                                                                                                      |
| N | A5WBB7 | DE | Inner membrane protein oxaA;                                                                                                                                                                                            |
| N | A5WBB7 | DR | protein insertion into membrane                                                                                                                                                                                         |
| N | A5WBG4 | CC | Required for disulfide bond formation in some periplasmic proteins                                                                                                                                                      |
| N | A5WBG4 | CC | Acts by oxidizing the DsbA protein (By similarity).                                                                                                                                                                     |
| N | A5WBG4 | DE | Disulfide bond formation protein B;                                                                                                                                                                                     |
| N | A5WBG4 | DE | Disulfide oxidoreductase;                                                                                                                                                                                               |
| N | A5WBG4 | DR | electron transport chain                                                                                                                                                                                                |
| N | A5WBG4 | DR | protein disulfide oxidoreductase activity                                                                                                                                                                               |
| N | A5WG42 | CC | NDH-1 shuttles electrons from NADH, via FMN and iron- sulfur (Fe-S) centers, to quinones in the respiratory chain                                                                                                       |
| N | A5WG42 | CC | Couples the redox reaction to proton translocation (for every two electrons transferred, four hydrogen ions are translocated across the cytoplasmic membrane), and thus conserves the redox energy in a proton gradient |
| N | A5WG42 | CC | The immediate electron acceptor for the enzyme in this species is believed to be ubiquinone                                                                                                                             |
| N | A5WG42 | CC | This subunit may bind ubiquinone (By similarity).                                                                                                                                                                       |
| N | A5WG42 | DE | NADH dehydrogenase I subunit H;                                                                                                                                                                                         |
| N | A5WG42 | DE | NADH-quinone oxidoreductase subunit H;                                                                                                                                                                                  |
| N | A5WG42 | DE | NDH-1 subunit H;                                                                                                                                                                                                        |
| N | A5WG42 | DR | NADH dehydrogenase (quinone) activity                                                                                                                                                                                   |
| N | A5WG42 | DR | oxidation-reduction process                                                                                                                                                                                             |
| N | A5WG42 | DR | quinone binding                                                                                                                                                                                                         |
| N | A6GZ72 | DE | 50S ribosomal protein L17;                                                                                                                                                                                              |
| N | A6GZ72 | DR | structural constituent of ribosome                                                                                                                                                                                      |
| N | A6H098 | CC | Catalyzes the oxidation of either pyridoxine 5'-phosphate (PNP) or pyridoxamine 5'-phosphate (PMP) into pyridoxal 5'-phosphate (PLP) (By similarity).                                                                   |
| N | A6H098 | DE | PNP/PMP oxidase;                                                                                                                                                                                                        |
| N | A6H098 | DE | Pyridoxal 5'-phosphate synthase;                                                                                                                                                                                        |
| N | A6H098 | DE | Pyridoxine/pyridoxamine 5'-phosphate oxidase;                                                                                                                                                                           |
| N | A6H098 | DR | oxidation-reduction process                                                                                                                                                                                             |
| N | A6H098 | DR | pyridoxamine-phosphate oxidase activity                                                                                                                                                                                 |
| N | A6H098 | DR | pyridoxine biosynthetic process                                                                                                                                                                                         |
| N | A6H0P1 | CC | Binds to the 23S rRNA (By similarity).                                                                                                                                                                                  |
| N | A6H0P1 | DE | 50S ribosomal protein L9;                                                                                                                                                                                               |
| N | A6H0P1 | DR | structural constituent of ribosome                                                                                                                                                                                      |
| N | A6H5Y1 | DE | M-phase phosphoprotein 9;                                                                                                                                                                                               |
| N | A6L4L7 | CC | Produces ATP from ADP in the presence of a proton gradient across the membrane.                                                                                                                                         |
| N | A6L4L7 | CC | The catalytic sites are hosted primarily by the beta subunits (By similarity).                                                                                                                                          |
| N | A6L4L7 | DE | ATP synthase F1 sector subunit beta;                                                                                                                                                                                    |
| N | A6L4L7 | DE | ATP synthase subunit beta;                                                                                                                                                                                              |
| N | A6L4L7 | DE | F-ATPase subunit beta;                                                                                                                                                                                                  |
| N | A6L4L7 | DR | ATP hydrolysis coupled proton transport                                                                                                                                                                                 |
| N | A6L4L7 | DR | ATP synthesis coupled proton transport                                                                                                                                                                                  |
| N | A6L4L7 | DR | hydrogen ion transporting ATP synthase activity, rotational mechanism                                                                                                                                                   |
| N | A6L4L7 | DR | hydrogen-exporting ATPase activity, phosphorylative mechanism                                                                                                                                                           |
| N | A6L4L7 | DR | proton-transporting ATPase activity, rotational mechanism                                                                                                                                                               |

|   |        |    |                                                                                                                                                                                                                                                                                                              |
|---|--------|----|--------------------------------------------------------------------------------------------------------------------------------------------------------------------------------------------------------------------------------------------------------------------------------------------------------------|
| N | A6L8J2 | CC | Catalyzes the oxidation of 5,10- methylenetetrahydrofolate to 5,10- methenyltetrahydrofolate and then the hydrolysis of 5,10- methenyltetrahydrofolate to 10- formyltetrahydrofolate (By similarity).                                                                                                        |
| N | A6L8J2 | DE | Bifunctional protein FOLD;                                                                                                                                                                                                                                                                                   |
| N | A6L8J2 | DE | Methenyltetrahydrofolate cyclohydrolase;                                                                                                                                                                                                                                                                     |
| N | A6L8J2 | DE | Methylenetetrahydrofolate dehydrogenase;                                                                                                                                                                                                                                                                     |
| N | A6L8J2 | DR | folic acid-containing compound biosynthetic process                                                                                                                                                                                                                                                          |
| N | A6L8J2 | DR | histidine biosynthetic process                                                                                                                                                                                                                                                                               |
| N | A6L8J2 | DR | methenyltetrahydrofolate cyclohydrolase activity                                                                                                                                                                                                                                                             |
| N | A6L8J2 | DR | methionine biosynthetic process                                                                                                                                                                                                                                                                              |
| N | A6L8J2 | DR | methylenetetrahydrofolate dehydrogenase (NADP+) activity                                                                                                                                                                                                                                                     |
| N | A6L8J2 | DR | one-carbon metabolic process                                                                                                                                                                                                                                                                                 |
| N | A6L8J2 | DR | oxidation-reduction process                                                                                                                                                                                                                                                                                  |
| N | A6L8J2 | DR | purine nucleotide biosynthetic process                                                                                                                                                                                                                                                                       |
| N | A6L8T2 | CC | Cleaves the N-terminal amino acid of tripeptides (By similarity).                                                                                                                                                                                                                                            |
| N | A6L8T2 | DE | Aminotripeptidase;                                                                                                                                                                                                                                                                                           |
| N | A6L8T2 | DE | Peptidase T;                                                                                                                                                                                                                                                                                                 |
| N | A6L8T2 | DE | Tripeptidase;                                                                                                                                                                                                                                                                                                |
| N | A6L8T2 | DE | Tripeptide aminopeptidase;                                                                                                                                                                                                                                                                                   |
| N | A6L8T2 | DR | metallopeptidase activity                                                                                                                                                                                                                                                                                    |
| N | A6L8T2 | DR | peptide metabolic process                                                                                                                                                                                                                                                                                    |
| N | A6L8T2 | DR | tripeptide aminopeptidase activity                                                                                                                                                                                                                                                                           |
| N | A6L8T2 | DR | zinc ion binding                                                                                                                                                                                                                                                                                             |
| N | A6LIG7 | CC | Catalyzes the attachment of valine to tRNA(Val)<br>As ValRS can inadvertently accommodate and process structurally similar amino acids such as threonine, to avoid such errors, it has a "posttransfer" editing activity that hydrolyzes mischarged Thr-tRNA(Val) in a tRNA-dependent manner (By similarity) |
| N | A6LIG7 | CC |                                                                                                                                                                                                                                                                                                              |
| N | A6LIG7 | DE | Valine--tRNA ligase;                                                                                                                                                                                                                                                                                         |
| N | A6LIG7 | DE | Valyl-tRNA synthetase;                                                                                                                                                                                                                                                                                       |
| N | A6LIG7 | DR | valine-tRNA ligase activity                                                                                                                                                                                                                                                                                  |
| N | A6LIG7 | DR | valyl-tRNA aminoacylation                                                                                                                                                                                                                                                                                    |
| N | A6LPN9 | CC | Catalyzes the formation of 4-diphosphocytidyl-2-C- methyl-D-erythritol from CTP and 2-C-methyl-D-erythritol 4- phosphate (MEP) (By similarity).                                                                                                                                                              |
| N | A6LPN9 | DE | 2-C-methyl-D-erythritol 4-phosphate cytidyltransferase;                                                                                                                                                                                                                                                      |
| N | A6LPN9 | DE | 4-diphosphocytidyl-2C-methyl-D-erythritol synthase;                                                                                                                                                                                                                                                          |
| N | A6LPN9 | DE | MEP cytidyltransferase;                                                                                                                                                                                                                                                                                      |
| N | A6LPN9 | DR | 2-C-methyl-D-erythritol 4-phosphate cytidyltransferase activity                                                                                                                                                                                                                                              |
| N | A6LPN9 | DR | isoprenoid biosynthetic process                                                                                                                                                                                                                                                                              |
| N | A6LPQ5 | CC | DNA-dependent RNA polymerase catalyzes the transcription of DNA into RNA using the four ribonucleoside triphosphates as substrates (By similarity).                                                                                                                                                          |
| N | A6LPQ5 | DE | DNA-directed RNA polymerase subunit beta';                                                                                                                                                                                                                                                                   |
| N | A6LPQ5 | DE | RNA polymerase subunit beta';                                                                                                                                                                                                                                                                                |
| N | A6LPQ5 | DE | RNAP subunit beta';                                                                                                                                                                                                                                                                                          |
| N | A6LPQ5 | DE | Transcriptase subunit beta';                                                                                                                                                                                                                                                                                 |
| N | A6LPQ5 | DR | DNA-directed RNA polymerase activity                                                                                                                                                                                                                                                                         |
| N | A6LPS1 | CC | Binds to 23S rRNA                                                                                                                                                                                                                                                                                            |
| N | A6LPS1 | CC | Forms part of two intersubunit bridges in the 70S ribosome (By similarity).                                                                                                                                                                                                                                  |
| N | A6LPS1 | DE | 50S ribosomal protein L14;                                                                                                                                                                                                                                                                                   |
| N | A6LPS1 | DR | structural constituent of ribosome                                                                                                                                                                                                                                                                           |
| N | A6LQR6 | CC | This protein binds to 23S rRNA in the presence of protein L20 (By similarity).                                                                                                                                                                                                                               |
| N | A6LQR6 | DE | 50S ribosomal protein L21;                                                                                                                                                                                                                                                                                   |
| N | A6LQR6 | DR | structural constituent of ribosome                                                                                                                                                                                                                                                                           |
| N | A6M273 | DE | Deoxycytidine triphosphate deaminase;                                                                                                                                                                                                                                                                        |
| N | A6M273 | DE | dCTP deaminase;                                                                                                                                                                                                                                                                                              |
| N | A6M273 | DR | dCTP deaminase activity                                                                                                                                                                                                                                                                                      |
| N | A6M273 | DR | dUTP biosynthetic process                                                                                                                                                                                                                                                                                    |
| N | A6M931 | CC | ATP-dependent RNA helicase                                                                                                                                                                                                                                                                                   |
| N | A6M931 | CC | Binds spliced mRNA in sequence-independent manner, 20-24 nucleotides upstream of mRNA exon-exon junctions                                                                                                                                                                                                    |
| N | A6M931 | CC | Component of a splicing- dependent multiprotein exon junction complex (EJC) deposited at splice junction on mRNAs                                                                                                                                                                                            |
| N | A6M931 | CC | Constitutes at least part of the platform anchoring other EJC proteins to spliced mRNAs                                                                                                                                                                                                                      |

|   |        |    |                                                                                                                                                                                                                                                                                                                                                                                                 |
|---|--------|----|-------------------------------------------------------------------------------------------------------------------------------------------------------------------------------------------------------------------------------------------------------------------------------------------------------------------------------------------------------------------------------------------------|
| N | A6M931 | CC | Core components of the EJC, that remains bound to spliced mRNAs throughout all stages of mRNA metabolism, functions to mark the position of the exon-exon junction in the mature mRNA and thereby influences downstream processes of gene expression including mRNA splicing, nuclear mRNA export, subcellular mRNA localization, translation efficiency and nonsense-mediated mRNA decay (NMD) |
| N | A6M931 | CC | Involved in translational enhancement of spliced mRNAs after formation of the 80S ribosome complex                                                                                                                                                                                                                                                                                              |
| N | A6M931 | CC | Its RNA-dependent ATPase and RNA-helicase activities are induced by CASC3, but abolished in presence of the MAGOH/RBM8A heterodimer, thereby trapping the ATP- bound EJC core onto spliced mRNA in a stable conformation                                                                                                                                                                        |
| N | A6M931 | CC | Shows higher affinity for single-stranded RNA in an ATP-bound core EJC complex than after the ATP is hydrolyzed (By similarity).                                                                                                                                                                                                                                                                |
| N | A6M931 | CC | The EJC is a dynamic structure consisting of a few core proteins and several more peripheral nuclear and cytoplasmic associated factors that join the complex only transiently either during EJC assembly or during subsequent mRNA metabolism                                                                                                                                                  |
| N | A6M931 | CC | The inhibition of ATPase activity by the MAGOH/RBM8A heterodimer increases the RNA-binding affinity of the EJC                                                                                                                                                                                                                                                                                  |
| N | A6M931 | DE | ATP-dependent RNA helicase DDX48;                                                                                                                                                                                                                                                                                                                                                               |
| N | A6M931 | DE | ATP-dependent RNA helicase eIF4A-3;                                                                                                                                                                                                                                                                                                                                                             |
| N | A6M931 | DE | DEAD box protein 48;                                                                                                                                                                                                                                                                                                                                                                            |
| N | A6M931 | DE | Eukaryotic initiation factor 4A-III;                                                                                                                                                                                                                                                                                                                                                            |
| N | A6M931 | DE | Eukaryotic translation initiation factor 4A isoform 3;                                                                                                                                                                                                                                                                                                                                          |
| N | A6M931 | DE | eIF-4A-III;                                                                                                                                                                                                                                                                                                                                                                                     |
| N | A6M931 | DR | mRNA processing                                                                                                                                                                                                                                                                                                                                                                                 |
| N | A6M931 | DR | mRNA transport                                                                                                                                                                                                                                                                                                                                                                                  |
| N | A6M931 | DR | nuclear-transcribed mRNA catabolic process, nonsense-mediated decay                                                                                                                                                                                                                                                                                                                             |
| N | A6M931 | DR | rRNA processing                                                                                                                                                                                                                                                                                                                                                                                 |
| N | A6MMP1 | DE | 50S ribosomal protein L36, chloroplastic;                                                                                                                                                                                                                                                                                                                                                       |
| N | A6MMP1 | DR | structural constituent of ribosome                                                                                                                                                                                                                                                                                                                                                              |
| N | A6MMV5 | CC | Seems to be required for the assembly of the photosystem I complex (By similarity)                                                                                                                                                                                                                                                                                                              |
| N | A6MMV5 | DE | Photosystem I assembly protein ycf4;                                                                                                                                                                                                                                                                                                                                                            |
| N | A6MMV5 | DR | photosynthesis                                                                                                                                                                                                                                                                                                                                                                                  |
| N | A6NFC5 | DE | Transmembrane protein 235;                                                                                                                                                                                                                                                                                                                                                                      |
| N | A6NFC5 | DR | structural molecule activity                                                                                                                                                                                                                                                                                                                                                                    |
| N | A6NHJ4 | CC | May be involved in transcriptional regulation (By similarity).                                                                                                                                                                                                                                                                                                                                  |
| N | A6NHJ4 | DE | Zinc finger protein 860;                                                                                                                                                                                                                                                                                                                                                                        |
| N | A6NHJ4 | DR | regulation of transcription, DNA-dependent                                                                                                                                                                                                                                                                                                                                                      |
| N | A6NHJ4 | DR | zinc ion binding                                                                                                                                                                                                                                                                                                                                                                                |
| N | A6NHP6 | DE | NPIP-like protein LOC729602;                                                                                                                                                                                                                                                                                                                                                                    |
| N | A6NIL9 | DE | Putative uncharacterized protein encoded by NCRNA00169;                                                                                                                                                                                                                                                                                                                                         |
| N | A6NNM8 | CC | Polyglutamylase which preferentially modifies alpha- tubulin                                                                                                                                                                                                                                                                                                                                    |
| N | A6NNM8 | CC | Involved in the side-chain elongation step of the polyglutamylation reaction rather than in the initiation step (By similarity).                                                                                                                                                                                                                                                                |
| N | A6NNM8 | DE | Tubulin polyglutamylase TTL13;                                                                                                                                                                                                                                                                                                                                                                  |
| N | A6NNM8 | DE | Tubulin--tyrosine ligase-like protein 13;                                                                                                                                                                                                                                                                                                                                                       |
| N | A6NNM8 | DR | protein modification process                                                                                                                                                                                                                                                                                                                                                                    |
| N | A6NNM8 | DR | tubulin-tyrosine ligase activity                                                                                                                                                                                                                                                                                                                                                                |
| N | A6Q169 | CC | Binds directly to 23S ribosomal RNA and is necessary for the in vitro assembly process of the 50S ribosomal subunit                                                                                                                                                                                                                                                                             |
| N | A6Q169 | CC | It is not involved in the protein synthesizing functions of that subunit (By similarity)                                                                                                                                                                                                                                                                                                        |
| N | A6Q169 | DE | 50S ribosomal protein L20;                                                                                                                                                                                                                                                                                                                                                                      |
| N | A6Q169 | DR | structural constituent of ribosome                                                                                                                                                                                                                                                                                                                                                              |
| N | A6Q1P4 | CC | NDH-1 shuttles electrons from NADH, via FMN and iron- sulfur (Fe-S) centers, to quinones in the respiratory chain                                                                                                                                                                                                                                                                               |
| N | A6Q1P4 | CC | Couples the redox reaction to proton translocation (for every two electrons transferred, four hydrogen ions are translocated across the cytoplasmic membrane), and thus conserves the redox energy in a proton gradient (By similarity)                                                                                                                                                         |
| N | A6Q1P4 | CC | The immediate electron acceptor for the enzyme in this species is believed to be ubiquinone                                                                                                                                                                                                                                                                                                     |
| N | A6Q1P4 | DE | NADH dehydrogenase I subunit B;                                                                                                                                                                                                                                                                                                                                                                 |
| N | A6Q1P4 | DE | NADH-quinone oxidoreductase subunit B;                                                                                                                                                                                                                                                                                                                                                          |
| N | A6Q1P4 | DE | NDH-1 subunit B;                                                                                                                                                                                                                                                                                                                                                                                |
| N | A6Q1P4 | DR | 4 iron, 4 sulfur cluster binding                                                                                                                                                                                                                                                                                                                                                                |
| N | A6Q1P4 | DR | NADH dehydrogenase (ubiquinone) activity                                                                                                                                                                                                                                                                                                                                                        |
| N | A6Q1P4 | DR | metal ion binding                                                                                                                                                                                                                                                                                                                                                                               |



|   |        |    |                                                                                                                                                                                                                     |
|---|--------|----|---------------------------------------------------------------------------------------------------------------------------------------------------------------------------------------------------------------------|
| N | A6Q1P4 | DR | oxidation-reduction process                                                                                                                                                                                         |
| N | A6Q1P4 | DR | quinone binding                                                                                                                                                                                                     |
| N | A6Q639 | CC | Catalyzes the transfer of a ribosyl phosphate group from 5-phosphoribose 1-diphosphate to orotate, leading to the formation of orotidine monophosphate (OMP) (By similarity).                                       |
| N | A6Q639 | DE | Orotate phosphoribosyltransferase;                                                                                                                                                                                  |
| N | A6Q639 | DR | nucleoside metabolic process                                                                                                                                                                                        |
| N | A6Q639 | DR | orotate phosphoribosyltransferase activity                                                                                                                                                                          |
| N | A6Q639 | DR | pyrimidine base biosynthetic process                                                                                                                                                                                |
| N | A6Q639 | DR | pyrimidine nucleotide biosynthetic process                                                                                                                                                                          |
| N | A6Q826 | CC | Catalyzes the decarboxylation of orotidine 5'- monophosphate (OMP) to uridine 5'-monophosphate (UMP) (By similarity).                                                                                               |
| N | A6Q826 | DE | OMP decarboxylase;                                                                                                                                                                                                  |
| N | A6Q826 | DE | Orotidine 5'-phosphate decarboxylase;                                                                                                                                                                               |
| N | A6Q826 | DR | 'de novo' UMP biosynthetic process                                                                                                                                                                                  |
| N | A6Q826 | DR | 'de novo' pyrimidine base biosynthetic process                                                                                                                                                                      |
| N | A6Q826 | DR | orotidine-5'-phosphate decarboxylase activity                                                                                                                                                                       |
| N | A6QHN4 | CC | Component of the acetyl coenzyme A carboxylase (ACC) complex                                                                                                                                                        |
| N | A6QHN4 | CC | First, biotin carboxylase catalyzes the carboxylation of biotin on its carrier protein (BCCP) and then the CO(2) group is transferred by the carboxyltransferase to acetyl-CoA to form malonyl-CoA (By similarity). |
| N | A6QHN4 | DE | ACCase subunit alpha;                                                                                                                                                                                               |
| N | A6QHN4 | DE | Acetyl-CoA carboxylase carboxyltransferase subunit alpha;                                                                                                                                                           |
| N | A6QHN4 | DE | Acetyl-coenzyme A carboxylase carboxyl transferase subunit alpha;                                                                                                                                                   |
| N | A6QHN4 | DR | acetyl-CoA carboxylase activity                                                                                                                                                                                     |
| N | A6QHN4 | DR | fatty acid biosynthetic process                                                                                                                                                                                     |
| N | A6QJH4 | CC | Metallothiol transferase which confers resistance to fosfomycin by catalyzing the addition of a thiol cofactor to fosfomycin                                                                                        |
| N | A6QJH4 | CC | L-cysteine is probably the physiological thiol donor (By similarity).                                                                                                                                               |
| N | A6QJH4 | DE | Fosfomycin resistance protein;                                                                                                                                                                                      |
| N | A6QJH4 | DE | Metallothiol transferase fosB;                                                                                                                                                                                      |
| N | A6QJH4 | DR | metal ion binding                                                                                                                                                                                                   |
| N | A6QJH4 | DR | response to antibiotic                                                                                                                                                                                              |
| N | A6QJH4 | DR | transferase activity, transferring alkyl or aryl (other than methyl) groups                                                                                                                                         |
| N | A6QLQ8 | CC | Endoribonuclease that cleaves single-stranded RNAs at uridylates and releases products that have 2'-3'-cyclic phosphate termini (By similarity).                                                                    |
| N | A6QLQ8 | DE | Poly(U)-specific endoribonuclease;                                                                                                                                                                                  |
| N | A6QLQ8 | DE | Protein endoU;                                                                                                                                                                                                      |
| N | A6QLQ8 | DE | Uridylate-specific endoribonuclease;                                                                                                                                                                                |
| N | A6QLQ8 | DR | endoribonuclease activity                                                                                                                                                                                           |
| N | A6QLQ8 | DR | immune response                                                                                                                                                                                                     |
| N | A6QLQ8 | DR | metal ion binding                                                                                                                                                                                                   |
| N | A6QLQ8 | DR | polysaccharide binding                                                                                                                                                                                              |
| N | A6QLQ8 | DR | scavenger receptor activity                                                                                                                                                                                         |
| N | A6QPA0 | CC | Plays an essential role in the maturation of presomitic mesoderm cells by individual attenuation of both FGF and WNT signaling (By similarity).                                                                     |
| N | A6QPA0 | DE | Protein shisa-2 homolog;                                                                                                                                                                                            |
| N | A6QPA0 | DE | Transmembrane protein 46;                                                                                                                                                                                           |
| N | A6QPA0 | DR | multicellular organismal development                                                                                                                                                                                |
| N | A6QQ93 | DE | Membrane protein FAM159B;                                                                                                                                                                                           |
| N | A6QQL9 | CC | Signal-recognition-particle assembly has a crucial role in targeting secretory proteins to the rough endoplasmic reticulum membrane                                                                                 |
| N | A6QQL9 | CC | SRP9 together with SRP14 and the Alu portion of the SRP RNA, constitutes the elongation arrest domain of SRP                                                                                                        |
| N | A6QQL9 | CC | The complex of SRP9 and SRP14 is required for SRP RNA binding (By similarity).                                                                                                                                      |
| N | A6QQL9 | DE | Signal recognition particle 14 kDa protein;                                                                                                                                                                         |
| N | A6QQL9 | DR | 7S RNA binding                                                                                                                                                                                                      |
| N | A6QQL9 | DR | SRP-dependent cotranslational protein targeting to membrane                                                                                                                                                         |
| N | A6QQL9 | DR | endoplasmic reticulum signal peptide binding                                                                                                                                                                        |
| N | A6QQL9 | DR | negative regulation of translational elongation                                                                                                                                                                     |
| N | A6QXC1 | CC | ATP-dependent RNA helicase required for 60S ribosomal subunit synthesis                                                                                                                                             |
| N | A6QXC1 | CC | Involved in efficient pre-rRNA processing, predominantly at site A3, which is necessary for the normal formation of 25S and 5.8S rRNAs (By similarity).                                                             |
| N | A6QXC1 | DE | ATP-dependent RNA helicase DBP3;                                                                                                                                                                                    |
| N | A6QXC1 | DR | ATP-dependent helicase activity                                                                                                                                                                                     |
| N | A6QXC1 | DR | rRNA processing                                                                                                                                                                                                     |

|   |        |    |                                                                                                                                                                                                                                                                                                                                                                   |
|---|--------|----|-------------------------------------------------------------------------------------------------------------------------------------------------------------------------------------------------------------------------------------------------------------------------------------------------------------------------------------------------------------------|
| N | A6SED8 | CC | Type-I myosin implicated in the organization of the actin cytoskeleton                                                                                                                                                                                                                                                                                            |
| N | A6SED8 | CC | At the cell cortex, assembles in patch-like structures together with proteins from the actin-polymerizing machinery and promotes actin assembly                                                                                                                                                                                                                   |
| N | A6SED8 | CC | Functions as actin nucleation-promoting factor (NPF) for the Arp2/3 complex (By similarity).                                                                                                                                                                                                                                                                      |
| N | A6SED8 | CC | Required for proper actin cytoskeleton polarization                                                                                                                                                                                                                                                                                                               |
| N | A6SED8 | DE | Class I unconventional myosin;                                                                                                                                                                                                                                                                                                                                    |
| N | A6SED8 | DE | Type I myosin;                                                                                                                                                                                                                                                                                                                                                    |
| N | A6SED8 | DR | actin binding                                                                                                                                                                                                                                                                                                                                                     |
| N | A6SED8 | DR | motor activity                                                                                                                                                                                                                                                                                                                                                    |
| N | A6SMQ7 | CC | forms a chaperone-bound H2A.Z-H2B complex that acts as a source for SWI1 complex-dependent H2A to H2A.Z histone replacement in chromatin (By similarity)                                                                                                                                                                                                          |
| N | A6SMQ7 | DE | Histone H2A.Z-specific chaperone chz1;                                                                                                                                                                                                                                                                                                                            |
| N | A6SUY3 | DE | Succinyl-CoA ligase [ADP-forming] subunit beta;                                                                                                                                                                                                                                                                                                                   |
| N | A6SUY3 | DE | Succinyl-CoA synthetase subunit beta;                                                                                                                                                                                                                                                                                                                             |
| N | A6SUY3 | DR | metal ion binding                                                                                                                                                                                                                                                                                                                                                 |
| N | A6SUY3 | DR | succinate-CoA ligase (ADP-forming) activity                                                                                                                                                                                                                                                                                                                       |
| N | A6SUY3 | DR | tricarboxylic acid cycle                                                                                                                                                                                                                                                                                                                                          |
| N | A6T4E3 | CC | Catalyzes the ATP-dependent phosphorylation of L- homoserine to L- homoserine phosphate (By similarity).                                                                                                                                                                                                                                                          |
| N | A6T4E3 | DE | Homoserine kinase;                                                                                                                                                                                                                                                                                                                                                |
| N | A6T4E3 | DR | homoserine kinase activity                                                                                                                                                                                                                                                                                                                                        |
| N | A6T4E3 | DR | threonine biosynthetic process                                                                                                                                                                                                                                                                                                                                    |
| N | A6T6L5 | CC | Catalyzes the conversion of dethiobiotin (DTB) to biotin by the insertion of a sulfur atom into dethiobiotin via a radical- based mechanism (By similarity).                                                                                                                                                                                                      |
| N | A6T6L5 | DE | Biotin synthase;                                                                                                                                                                                                                                                                                                                                                  |
| N | A6T6L5 | DR | 2 iron, 2 sulfur cluster binding                                                                                                                                                                                                                                                                                                                                  |
| N | A6T6L5 | DR | 4 iron, 4 sulfur cluster binding                                                                                                                                                                                                                                                                                                                                  |
| N | A6T6L5 | DR | biotin biosynthetic process                                                                                                                                                                                                                                                                                                                                       |
| N | A6T6L5 | DR | biotin synthase activity                                                                                                                                                                                                                                                                                                                                          |
| N | A6T6L5 | DR | metal ion binding                                                                                                                                                                                                                                                                                                                                                 |
| N | A6T766 | CC | Specifically methylates the cytosine at position 1962 (m5C1962) of 23S rRNA (By similarity).                                                                                                                                                                                                                                                                      |
| N | A6T766 | DE | 23S rRNA m5C1962 methyltransferase;                                                                                                                                                                                                                                                                                                                               |
| N | A6T766 | DE | Ribosomal RNA large subunit methyltransferase I;                                                                                                                                                                                                                                                                                                                  |
| N | A6T766 | DE | rRNA (cytosine-C(5))-methyltransferase RlmI;                                                                                                                                                                                                                                                                                                                      |
| N | A6T766 | DR | rRNA methyltransferase activity                                                                                                                                                                                                                                                                                                                                   |
| N | A6TE36 | CC | Catalyzes the dephosphorylation of undecaprenyl diphosphate (UPP)                                                                                                                                                                                                                                                                                                 |
| N | A6TE36 | CC | Confers resistance to bacitracin (By similarity).                                                                                                                                                                                                                                                                                                                 |
| N | A6TE36 | DE | Bacitracin resistance protein;                                                                                                                                                                                                                                                                                                                                    |
| N | A6TE36 | DE | Undecaprenyl pyrophosphate phosphatase;                                                                                                                                                                                                                                                                                                                           |
| N | A6TE36 | DE | Undecaprenyl-diphosphatase;                                                                                                                                                                                                                                                                                                                                       |
| N | A6TE36 | DR | cellular cell wall organization                                                                                                                                                                                                                                                                                                                                   |
| N | A6TE36 | DR | dephosphorylation                                                                                                                                                                                                                                                                                                                                                 |
| N | A6TE36 | DR | peptidoglycan biosynthetic process                                                                                                                                                                                                                                                                                                                                |
| N | A6TE36 | DR | regulation of cell shape                                                                                                                                                                                                                                                                                                                                          |
| N | A6TE36 | DR | response to antibiotic                                                                                                                                                                                                                                                                                                                                            |
| N | A6TE36 | DR | undecaprenyl-diphosphatase activity                                                                                                                                                                                                                                                                                                                               |
| N | A6TQJ6 | CC | An essential GTPase which binds GTP, GDP and possibly (p)ppGpp with moderate affinity, with high nucleotide exchange rates and a fairly low GTP hydrolysis rate (By similarity)<br>it may play a role in control of the cell cycle, stress response, ribosome biogenesis and in those bacteria that undergo differentiation, in morphogenesis control (Potential) |
| N | A6TQJ6 | DE | GTP-binding protein obg;                                                                                                                                                                                                                                                                                                                                          |
| N | A6TQJ6 | DR | GTPase activity                                                                                                                                                                                                                                                                                                                                                   |
| N | A6TQJ6 | DR | magnesium ion binding                                                                                                                                                                                                                                                                                                                                             |
| N | A6TWF2 | DE | 50S ribosomal protein L17;                                                                                                                                                                                                                                                                                                                                        |
| N | A6TWF2 | DR | structural constituent of ribosome                                                                                                                                                                                                                                                                                                                                |
| N | A6TXC8 | DE | UPF0133 protein Amet_4780;                                                                                                                                                                                                                                                                                                                                        |
| N | A6U041 | CC | Involved in the biosynthesis of D-alanyl-lipoteichoic acid (LTA)                                                                                                                                                                                                                                                                                                  |
| N | A6U041 | CC | Activated D-alanyl-Dcp donates its D-alanyl substituent to membrane-associated LTA (By similarity).                                                                                                                                                                                                                                                               |
| N | A6U041 | DE | D-alanine--poly(phosphoribitol) ligase subunit 2;                                                                                                                                                                                                                                                                                                                 |
| N | A6U041 | DE | D-alanyl carrier protein;                                                                                                                                                                                                                                                                                                                                         |
| N | A6U041 | DR | D-alanine-poly(phosphoribitol) ligase activity                                                                                                                                                                                                                                                                                                                    |

|   |        |    |                                                                                                                                                                                                        |
|---|--------|----|--------------------------------------------------------------------------------------------------------------------------------------------------------------------------------------------------------|
| N | A6U041 | DR | acyl carrier activity                                                                                                                                                                                  |
| N | A6U041 | DR | cellular cell wall organization                                                                                                                                                                        |
| N | A6U041 | DR | cofactor binding                                                                                                                                                                                       |
| N | A6U041 | DR | regulation of cell shape                                                                                                                                                                               |
| N | A6U041 | DR | teichoic acid biosynthetic process                                                                                                                                                                     |
| N | A6U0U8 | CC | Involved in heme (porphyrin) scavenging                                                                                                                                                                |
| N | A6U0U8 | CC | Binds hemoglobin and almost exclusively free-base protoporphyrin IX                                                                                                                                    |
| N | A6U0U8 | CC | Hemin-free isdC (apo-isdC) acquires hemin from hemin-containing isdA (holo-isdA) probably through the activated holo-isdA-apo-isdC complex and due to the higher affinity of apo-isdC for the cofactor |
| N | A6U0U8 | CC | Probably has a role as the central conduit of the isd heme uptake system, i.e., mediates the transfer of the iron-containing nutrient from isdABH to the membrane translocation system isdDEF          |
| N | A6U0U8 | CC | The reaction is reversible (By similarity).                                                                                                                                                            |
| N | A6U0U8 | DE | Iron-regulated surface determinant protein C;                                                                                                                                                          |
| N | A6U0U8 | DE | Staphylococcal iron-regulated protein D;                                                                                                                                                               |
| N | A6U0U8 | DR | heme transport                                                                                                                                                                                         |
| N | A6U0U8 | DR | hemoglobin binding                                                                                                                                                                                     |
| N | A6U0U8 | DR | metal ion binding                                                                                                                                                                                      |
| N | A6U1F6 | CC | Binds 16S rRNA, required for the assembly of 50S particles and may also be responsible for determining the conformation of the 16S rRNA at the A site (By similarity)                                  |
| N | A6U1F6 | DE | 30S ribosomal protein S14;                                                                                                                                                                             |
| N | A6U1F6 | DR | structural constituent of ribosome                                                                                                                                                                     |
| N | A6U305 | CC | Furnishes a means for formation of correctly charged Gln-tRNA(Gln) through the transamidation of misacylated Glu- tRNA(Gln) in organisms which lack glutaminyl-tRNA synthetase                         |
| N | A6U305 | CC | The reaction takes place in the presence of glutamine and ATP through an activated gamma-phospho-Glu-tRNA(Gln) (By similarity).                                                                        |
| N | A6U305 | DE | Glu-ADT subunit A;                                                                                                                                                                                     |
| N | A6U305 | DE | Glutamyl-tRNA(Gln) amidotransferase subunit A;                                                                                                                                                         |
| N | A6U305 | DR | carbon-nitrogen ligase activity, with glutamine as amido-N-donor                                                                                                                                       |
| N | A6U3E7 | DE | Protein sprT-like;                                                                                                                                                                                     |
| N | A6U3E7 | DR | metal ion binding                                                                                                                                                                                      |
| N | A6U516 | CC | Formation of pseudouridine at positions 38, 39 and 40 in the anticodon stem and loop of transfer RNAs (By similarity).                                                                                 |
| N | A6U516 | DE | tRNA pseudouridine synthase A;                                                                                                                                                                         |
| N | A6U516 | DE | tRNA pseudouridylyl synthase I;                                                                                                                                                                        |
| N | A6U516 | DE | tRNA-uridine isomerase I;                                                                                                                                                                              |
| N | A6U516 | DR | pseudouridine synthase activity                                                                                                                                                                        |
| N | A6U516 | DR | pseudouridine synthesis                                                                                                                                                                                |
| N | A6U516 | DR | tRNA processing                                                                                                                                                                                        |
| N | A6UB63 | CC | Catalyzes the condensation of pantoate with beta-alanine in an ATP-dependent reaction via a pantoal-adenylate intermediate (By similarity).                                                            |
| N | A6UB63 | DE | Pantoate--beta-alanine ligase;                                                                                                                                                                         |
| N | A6UB63 | DE | Pantoate-activating enzyme;                                                                                                                                                                            |
| N | A6UB63 | DE | Pantothenate synthetase;                                                                                                                                                                               |
| N | A6UB63 | DR | pantoate-beta-alanine ligase activity                                                                                                                                                                  |
| N | A6UB63 | DR | pantothenate biosynthetic process                                                                                                                                                                      |
| N | A6UDM7 | CC | Transaldolase is important for the balance of metabolites in the pentose-phosphate pathway (By similarity).                                                                                            |
| N | A6UDM7 | DE | Probable transaldolase;                                                                                                                                                                                |
| N | A6UDM7 | DR | pentose-phosphate shunt                                                                                                                                                                                |
| N | A6UDM7 | DR | sedoheptulose-7-phosphate-D-glycerate-3-phosphate glyceroneuansferase activity                                                                                                                         |
| N | A6UE79 | CC | Converts 2C-methyl-D-erythritol 2,4-cyclodiphosphate (ME-2,4cPP) into 1-hydroxy-2-methyl-2-(E)-butenyl 4-diphosphate (By similarity).                                                                  |
| N | A6UE79 | DE | 1-hydroxy-2-methyl-2-(E)-butenyl 4-diphosphate synthase;                                                                                                                                               |
| N | A6UE79 | DE | 4-hydroxy-3-methylbut-2-en-1-yl diphosphate synthase;                                                                                                                                                  |
| N | A6UE79 | DR | 4 iron, 4 sulfur cluster binding                                                                                                                                                                       |
| N | A6UE79 | DR | 4-hydroxy-3-methylbut-2-en-1-yl diphosphate synthase activity                                                                                                                                          |
| N | A6UE79 | DR | iron ion binding                                                                                                                                                                                       |
| N | A6UE79 | DR | oxidation-reduction process                                                                                                                                                                            |
| N | A6UE79 | DR | terpenoid biosynthetic process                                                                                                                                                                         |
| N | A6URL2 | DE | Glutamate-1-semialdehyde 2,1-aminomutase;                                                                                                                                                              |
| N | A6URL2 | DE | Glutamate-1-semialdehyde aminotransferase;                                                                                                                                                             |
| N | A6URL2 | DR | glutamate-1-semialdehyde 2,1-aminomutase activity                                                                                                                                                      |

|   |        |    |                                                                                                                                                                   |
|---|--------|----|-------------------------------------------------------------------------------------------------------------------------------------------------------------------|
| N | A6URL2 | DR | porphyrin biosynthetic process                                                                                                                                    |
| N | A6URL2 | DR | pyridoxal phosphate binding                                                                                                                                       |
| N | A6URL2 | DR | transaminase activity                                                                                                                                             |
| N | A6US52 | DE | 30S ribosomal protein S24e;                                                                                                                                       |
| N | A6US52 | DR | nucleotide binding                                                                                                                                                |
| N | A6US52 | DR | structural constituent of ribosome                                                                                                                                |
| N | A6UU96 | DE | UPF0264 protein Maeo_0482;                                                                                                                                        |
| N | A6UU96 | DR | catalytic activity                                                                                                                                                |
| N | A6UVT6 | CC | Involved in F420 biosynthesis through the oxidation of lactaldehyde to lactate (By similarity).                                                                   |
| N | A6UVT6 | DE | Lactaldehyde dehydrogenase;                                                                                                                                       |
| N | A6UVT6 | DR | lactaldehyde dehydrogenase activity                                                                                                                               |
| N | A6UVT6 | DR | oxidation-reduction process                                                                                                                                       |
| N | A6V0W4 | CC | GTPase that plays an essential role in the late steps of ribosome biogenesis (By similarity).                                                                     |
| N | A6V0W4 | DE | GTP-binding protein EngA;                                                                                                                                         |
| N | A6V0W4 | DR | nucleoside-triphosphatase activity                                                                                                                                |
| N | A6V0W4 | DR | ribosome biogenesis                                                                                                                                               |
| N | A6V1J0 | DE | 50S ribosomal protein L36 2;                                                                                                                                      |
| N | A6V1J0 | DR | structural constituent of ribosome                                                                                                                                |
| N | A6V383 | CC | Catalyzes the final step of fatty acid oxidation in which acetyl-CoA is released and the CoA ester of a fatty acid two carbons shorter is formed (By similarity). |
| N | A6V383 | DE | 3-ketoacyl-CoA thiolase;                                                                                                                                          |
| N | A6V383 | DE | Acetyl-CoA acyltransferase;                                                                                                                                       |
| N | A6V383 | DE | Beta-ketothiolase;                                                                                                                                                |
| N | A6V383 | DE | Fatty acid oxidation complex subunit beta;                                                                                                                        |
| N | A6V383 | DR | acetyl-CoA C-acyltransferase activity                                                                                                                             |
| N | A6V383 | DR | fatty acid metabolic process                                                                                                                                      |
| N | A6V383 | DR | lipid catabolic process                                                                                                                                           |
| N | A6V3C9 | CC | Catalyzes the reversible formation of acyl-phosphate (acyl-PO(4)) from acyl-[acyl-carrier-protein] (acyl-ACP)                                                     |
| N | A6V3C9 | CC | This enzyme utilizes acyl-ACP as fatty acyl donor, but not acyl-CoA (By similarity)                                                                               |
| N | A6V3C9 | DE | Acyl-ACP phosphotransacylase;                                                                                                                                     |
| N | A6V3C9 | DE | Acyl-[acyl-carrier-protein]--phosphate acyltransferase;                                                                                                           |
| N | A6V3C9 | DE | Phosphate acyltransferase;                                                                                                                                        |
| N | A6V3C9 | DE | Phosphate-acyl-ACP acyltransferase;                                                                                                                               |
| N | A6V3C9 | DR | fatty acid biosynthetic process                                                                                                                                   |
| N | A6V3C9 | DR | phospholipid biosynthetic process                                                                                                                                 |
| N | A6V3C9 | DR | transferase activity, transferring acyl groups other than amino-acyl groups                                                                                       |
| N | A6V720 | CC | Involved in protein export                                                                                                                                        |
| N | A6V720 | CC | Acts as a chaperone by maintaining the newly synthesized protein in an open conformation (By similarity).                                                         |
| N | A6V720 | DE | Trigger factor;                                                                                                                                                   |
| N | A6V720 | DR | cell division                                                                                                                                                     |
| N | A6V720 | DR | peptidyl-prolyl cis-trans isomerase activity                                                                                                                      |
| N | A6V720 | DR | protein folding                                                                                                                                                   |
| N | A6V720 | DR | protein transport                                                                                                                                                 |
| N | A6VC67 | CC | This is one of the proteins that binds to the 5S RNA in the ribosome where it forms part of the central protuberance (By similarity).                             |
| N | A6VC67 | DE | 50S ribosomal protein L25;                                                                                                                                        |
| N | A6VC67 | DE | General stress protein CTC;                                                                                                                                       |
| N | A6VC67 | DR | 5S rRNA binding                                                                                                                                                   |
| N | A6VC67 | DR | structural constituent of ribosome                                                                                                                                |
| N | A6VQ73 | DE | 1-(5-phosphoribosyl)-5-[(5-phosphoribosylamino)methylideneamino] imidazole-4-carboxamide isomerase;                                                               |
| N | A6VQ73 | DE | Phosphoribosylformimino-5-aminoimidazole carboxamide ribotide isomerase;                                                                                          |
| N | A6VQ73 | DR | 1-(5-phosphoribosyl)-5-[(5-phosphoribosylamino)methylideneamino]imidazole-4-carboxamide isomerase activity                                                        |
| N | A6VQ73 | DR | histidine biosynthetic process                                                                                                                                    |
| N | A6W2W4 | CC | Catalyzes the synthesis of GMP from XMP (By similarity).                                                                                                          |
| N | A6W2W4 | DE | GMP synthase [glutamine-hydrolyzing];                                                                                                                             |
| N | A6W2W4 | DE | GMP synthetase;                                                                                                                                                   |
| N | A6W2W4 | DE | Glutamine amidotransferase;                                                                                                                                       |
| N | A6W2W4 | DR | GMP biosynthetic process                                                                                                                                          |
| N | A6W2W4 | DR | GMP synthase (glutamine-hydrolyzing) activity                                                                                                                     |

|   |        |    |                                                                                                                                                                                                                                                                            |
|---|--------|----|----------------------------------------------------------------------------------------------------------------------------------------------------------------------------------------------------------------------------------------------------------------------------|
| N | A6W2W4 | DR | glutamine metabolic process                                                                                                                                                                                                                                                |
| N | A6WP56 | CC | is required not only for elongation of protein synthesis but also for the initiation of all mRNA translation through initiator tRNA(fMet) aminoacylation (By similarity)                                                                                                   |
| N | A6WP56 | DE | Methionine--tRNA ligase;                                                                                                                                                                                                                                                   |
| N | A6WP56 | DE | Methionyl-tRNA synthetase;                                                                                                                                                                                                                                                 |
| N | A6WP56 | DR | metal ion binding                                                                                                                                                                                                                                                          |
| N | A6WP56 | DR | methionine-tRNA ligase activity                                                                                                                                                                                                                                            |
| N | A6WP56 | DR | methionyl-tRNA aminoacylation                                                                                                                                                                                                                                              |
| N | A6WXX0 | CC | Produces ATP from ADP in the presence of a proton gradient across the membrane                                                                                                                                                                                             |
| N | A6WXX0 | CC | The gamma chain is believed to be important in regulating ATPase activity and the flow of protons through the CF(0) complex (By similarity).                                                                                                                               |
| N | A6WXX0 | DE | ATP synthase F1 sector gamma subunit;                                                                                                                                                                                                                                      |
| N | A6WXX0 | DE | ATP synthase gamma chain;                                                                                                                                                                                                                                                  |
| N | A6WXX0 | DE | F-ATPase gamma subunit;                                                                                                                                                                                                                                                    |
| N | A6WXX0 | DR | ATP synthesis coupled proton transport                                                                                                                                                                                                                                     |
| N | A6WXX0 | DR | hydrogen ion transporting ATP synthase activity, rotational mechanism                                                                                                                                                                                                      |
| N | A6WXX0 | DR | proton-transporting ATPase activity, rotational mechanism                                                                                                                                                                                                                  |
| N | A6WZD8 | CC | Catalyzes a salvage reaction resulting in the formation of AMP, that is energetically less costly than de novo synthesis (By similarity).                                                                                                                                  |
| N | A6WZD8 | DE | Adenine phosphoribosyltransferase;                                                                                                                                                                                                                                         |
| N | A6WZD8 | DR | adenine phosphoribosyltransferase activity                                                                                                                                                                                                                                 |
| N | A6WZD8 | DR | adenine salvage                                                                                                                                                                                                                                                            |
| N | A6WZD8 | DR | purine ribonucleoside salvage                                                                                                                                                                                                                                              |
| N | A6X0A5 | CC | This protein binds directly to 23S ribosomal RNA (By similarity).                                                                                                                                                                                                          |
| N | A6X0A5 | DE | 50S ribosomal protein L11;                                                                                                                                                                                                                                                 |
| N | A6X0A5 | DR | structural constituent of ribosome                                                                                                                                                                                                                                         |
| N | A6X1M5 | CC | NDH-1 shuttles electrons from NADH, via FMN and iron- sulfur (Fe-S) centers, to quinones in the respiratory chain                                                                                                                                                          |
| N | A6X1M5 | CC | Couples the redox reaction to proton translocation (for every two electrons transferred, four hydrogen ions are translocated across the cytoplasmic membrane), and thus conserves the redox energy in a proton gradient (By similarity)                                    |
| N | A6X1M5 | CC | The immediate electron acceptor for the enzyme in this species is believed to be ubiquinone                                                                                                                                                                                |
| N | A6X1M5 | DE | NADH dehydrogenase I subunit I;                                                                                                                                                                                                                                            |
| N | A6X1M5 | DE | NADH-quinone oxidoreductase subunit I;                                                                                                                                                                                                                                     |
| N | A6X1M5 | DE | NDH-1 subunit I;                                                                                                                                                                                                                                                           |
| N | A6X1M5 | DR | 4 iron, 4 sulfur cluster binding                                                                                                                                                                                                                                           |
| N | A6X1M5 | DR | NADH dehydrogenase (quinone) activity                                                                                                                                                                                                                                      |
| N | A6X1M5 | DR | electron carrier activity                                                                                                                                                                                                                                                  |
| N | A6X1M5 | DR | metal ion binding                                                                                                                                                                                                                                                          |
| N | A6X1M5 | DR | oxidation-reduction process                                                                                                                                                                                                                                                |
| N | A6X1M5 | DR | quinone binding                                                                                                                                                                                                                                                            |
| N | A6YG90 | DE | Protein psbN;                                                                                                                                                                                                                                                              |
| N | A6YG90 | DR | photosynthesis                                                                                                                                                                                                                                                             |
| N | A6ZQX9 | CC | Forms a chaperone-bound H2A.Z-H2B complex that acts as a source for SWK1 complex-dependent H2A to H2A.Z histone replacement in chromatin (By similarity)                                                                                                                   |
| N | A6ZQX9 | DE | Histone H2A.Z-specific chaperone CHZ1;                                                                                                                                                                                                                                     |
| N | A6ZRZ6 | CC | Component of the PAN1 actin cytoskeleton-regulatory complex required for the internalization of endosomes during actin-coupled endocytosis                                                                                                                                 |
| N | A6ZRZ6 | CC | END3 regulates PAN1 function by preventing phosphorylation of PAN1 by PKR1 and is also involved in the correct localization of SLA1 to the cell cortex, in the bipolar budding of diploid cells and the correct distribution of chitin at the cell surface (By similarity) |
| N | A6ZRZ6 | CC | Mediates uptake of external molecules and vacuolar degradation of plasma membrane proteins                                                                                                                                                                                 |
| N | A6ZRZ6 | CC | Plays a role in the proper organization of the cell membrane-associated actin cytoskeleton and promotes its destabilization                                                                                                                                                |
| N | A6ZRZ6 | CC | The complex links the site of endocytosis to the cell membrane-associated actin cytoskeleton                                                                                                                                                                               |
| N | A6ZRZ6 | DE | Actin cytoskeleton-regulatory complex protein END3;                                                                                                                                                                                                                        |
| N | A6ZRZ6 | DE | Endocytosis protein 3;                                                                                                                                                                                                                                                     |
| N | A6ZRZ6 | DR | actin binding                                                                                                                                                                                                                                                              |
| N | A6ZRZ6 | DR | calcium ion binding                                                                                                                                                                                                                                                        |

|   |        |    |                                                                                                                                                                                                                                                                                                                                           |
|---|--------|----|-------------------------------------------------------------------------------------------------------------------------------------------------------------------------------------------------------------------------------------------------------------------------------------------------------------------------------------------|
| N | A6ZWL1 | CC | Component of the nascent polypeptide-associated complex (NAC), a dynamic component of the ribosomal exit tunnel, protecting the emerging polypeptides from interaction with other cytoplasmic proteins to ensure appropriate nascent protein targeting (By similarity)                                                                    |
| N | A6ZWL1 | CC | EGD1 may act as a transcription factor that exert a negative effect on the expression of several genes that are transcribed by RNA polymerase II (By similarity)                                                                                                                                                                          |
| N | A6ZWL1 | CC | The NAC complex also promotes mitochondrial protein import by enhancing productive ribosome interactions with the outer mitochondrial membrane and blocks the inappropriate interaction of ribosomes translating non-secretory nascent polypeptides with translocation sites in the membrane of the endoplasmic reticulum (By similarity) |
| N | A6ZWL1 | DE | BTF3 homolog EGD1;                                                                                                                                                                                                                                                                                                                        |
| N | A6ZWL1 | DE | GAL4 DNA-binding enhancer protein 1;                                                                                                                                                                                                                                                                                                      |
| N | A6ZWL1 | DE | NAC-beta-1;                                                                                                                                                                                                                                                                                                                               |
| N | A6ZWL1 | DE | Nascent polypeptide-associated complex subunit beta-1;                                                                                                                                                                                                                                                                                    |
| N | A6ZWL1 | DR | protein transport                                                                                                                                                                                                                                                                                                                         |
| N | A6ZXD2 | CC | Methyltransferase that catalyzes the formation of N(7)- methylguanine at position 46 (m7G46) in tRNA, a modification required to maintain stability of tRNAs; its absence resulting in tRNA decay                                                                                                                                         |
| N | A6ZXD2 | CC | Both the D-stem and T-stem structures of tRNAs are required for efficient methyltransferase activity (By similarity).                                                                                                                                                                                                                     |
| N | A6ZXD2 | DE | Transfer RNA methyltransferase 8;                                                                                                                                                                                                                                                                                                         |
| N | A6ZXD2 | DE | tRNA (guanine-N(7)-)-methyltransferase;                                                                                                                                                                                                                                                                                                   |
| N | A6ZXD2 | DE | tRNA(m7G46)-methyltransferase;                                                                                                                                                                                                                                                                                                            |
| N | A6ZXD2 | DR | tRNA (guanine-N7-)-methyltransferase activity                                                                                                                                                                                                                                                                                             |
| N | A6ZXT5 | DE | Pheromone-regulated protein PRM7;                                                                                                                                                                                                                                                                                                         |
| N | A7BJC5 | CC | Involved in the isomerization of 5-deoxy-glucuronate (5DG) to 5-dehydro-2-deoxy-D-gluconate (DKG or 2-deoxy-5-keto-D- gluconate) (By similarity).                                                                                                                                                                                         |
| N | A7BJC5 | DE | 5-deoxy-glucuronate isomerase;                                                                                                                                                                                                                                                                                                            |
| N | A7BJC5 | DE | 5DG isomerase;                                                                                                                                                                                                                                                                                                                            |
| N | A7BJC5 | DR | intramolecular oxidoreductase activity, interconverting aldoses and ketoses involved in cytoplasmic to vacuole transport (Cvt) vesicles and autophagosomes formation                                                                                                                                                                      |
| N | A7E8H4 | CC | May mediate the delivery of the vesicles and autophagosomes to the vacuole via the microtubule cytoskeleton (By similarity).                                                                                                                                                                                                              |
| N | A7E8H4 | DE | Autophagy-related protein 8;                                                                                                                                                                                                                                                                                                              |
| N | A7E8H4 | DE | Autophagy-related ubiquitin-like modifier atg8;                                                                                                                                                                                                                                                                                           |
| N | A7E8H4 | DR | protein transport                                                                                                                                                                                                                                                                                                                         |
| N | A7EML8 | CC | Required for pre-ribosomal RNA processing                                                                                                                                                                                                                                                                                                 |
| N | A7EML8 | CC | Involved in the maturation of the 35S-pre-rRNA and to its cleavage to mature 18S rRNA (By similarity).                                                                                                                                                                                                                                    |
| N | A7EML8 | DE | ATP-dependent rRNA helicase rrp3;                                                                                                                                                                                                                                                                                                         |
| N | A7EML8 | DR | ATP-dependent helicase activity                                                                                                                                                                                                                                                                                                           |
| N | A7EML8 | DR | rRNA processing                                                                                                                                                                                                                                                                                                                           |
| N | A7FD13 | CC | Catalyzes the formation of 5-methyl-uridine at position 54 (M-5-U54) in all tRNAs (By similarity).                                                                                                                                                                                                                                        |
| N | A7FD13 | DE | tRNA (uracil-5-)-methyltransferase;                                                                                                                                                                                                                                                                                                       |
| N | A7FD13 | DE | tRNA(M-5-U54)-methyltransferase;                                                                                                                                                                                                                                                                                                          |
| N | A7FD13 | DR | tRNA (uracil-5-)-methyltransferase activity                                                                                                                                                                                                                                                                                               |
| N | A7FFN2 | DE | Urea amidohydrolase subunit alpha;                                                                                                                                                                                                                                                                                                        |
| N | A7FFN2 | DE | Urease subunit alpha;                                                                                                                                                                                                                                                                                                                     |
| N | A7FFN2 | DR | nickel ion binding                                                                                                                                                                                                                                                                                                                        |
| N | A7FFN2 | DR | urea metabolic process                                                                                                                                                                                                                                                                                                                    |
| N | A7FFN2 | DR | urease activity                                                                                                                                                                                                                                                                                                                           |
| N | A7FJS2 | DE | Methylglyoxal synthase;                                                                                                                                                                                                                                                                                                                   |
| N | A7FJS2 | DR | methylglyoxal biosynthetic process                                                                                                                                                                                                                                                                                                        |
| N | A7FJS2 | DR | methylglyoxal synthase activity                                                                                                                                                                                                                                                                                                           |
| N | A7FNP1 | CC | With S4 and S5 plays an important role in translational accuracy (By similarity).                                                                                                                                                                                                                                                         |
| N | A7FNP1 | DE | 30S ribosomal protein S12;                                                                                                                                                                                                                                                                                                                |
| N | A7FNP1 | DR | structural constituent of ribosome                                                                                                                                                                                                                                                                                                        |
| N | A7FNW5 | CC | Catalyzes, although with low efficiency, the sulfur transfer reaction from thiosulfate to cyanide (By similarity).                                                                                                                                                                                                                        |
| N | A7FNW5 | DE | Thiosulfate sulfurtransferase glpE;                                                                                                                                                                                                                                                                                                       |
| N | A7FNW5 | DR | glycerol metabolic process                                                                                                                                                                                                                                                                                                                |
| N | A7FNW5 | DR | thiosulfate sulfurtransferase activity                                                                                                                                                                                                                                                                                                    |
| N | A7FR34 | CC | Endonuclease that specifically degrades the RNA of RNA- DNA hybrids (By similarity).                                                                                                                                                                                                                                                      |

|   |        |    |                                                                                                                                                        |
|---|--------|----|--------------------------------------------------------------------------------------------------------------------------------------------------------|
| N | A7FR34 | DE | Ribonuclease H;                                                                                                                                        |
| N | A7FR34 | DR | metal ion binding                                                                                                                                      |
| N | A7FR34 | DR | nucleic acid binding                                                                                                                                   |
| N | A7FR34 | DR | ribonuclease H activity                                                                                                                                |
| N | A7FRB3 | CC | Catalyzes the formation of N(7)-methylguanine at position 46 (m7G46) in tRNA (By similarity).                                                          |
| N | A7FRB3 | DE | tRNA (guanine-N(7)-)-methyltransferase;                                                                                                                |
| N | A7FRB3 | DE | tRNA(m7G46)-methyltransferase;                                                                                                                         |
| N | A7FRB3 | DR | tRNA (guanine-N7-)-methyltransferase activity                                                                                                          |
| N | A7FXK9 | DE | 30S ribosomal protein S21;                                                                                                                             |
| N | A7FXK9 | DR | structural constituent of ribosome                                                                                                                     |
| N | A7FZA5 | DE | Lysine--tRNA ligase;                                                                                                                                   |
| N | A7FZA5 | DE | Lysyl-tRNA synthetase;                                                                                                                                 |
| N | A7FZA5 | DR | lysine-tRNA ligase activity                                                                                                                            |
| N | A7FZA5 | DR | lysyl-tRNA aminoacylation                                                                                                                              |
| N | A7FZA5 | DR | metal ion binding                                                                                                                                      |
| N | A7FZA5 | DR | nucleic acid binding                                                                                                                                   |
| N | A7GA53 | DE | Adenine aminase;                                                                                                                                       |
| N | A7GA53 | DE | Adenine deaminase;                                                                                                                                     |
| N | A7GA53 | DR | adenine catabolic process                                                                                                                              |
| N | A7GA53 | DR | adenine deaminase activity                                                                                                                             |
| N | A7GJV3 | CC | Specifically dimethylates two adjacent adenosines (A1518 and A1519) in the loop of a conserved hairpin near the 3'-end of 16S rRNA in the 30S particle |
| N | A7GJV3 | CC | May play a critical role in biogenesis of 30S subunits (By similarity).                                                                                |
| N | A7GJV3 | DE | 16S rRNA (adenine(1518)-N(6)/adenine(1519)-N(6))-dimethyltransferase;                                                                                  |
| N | A7GJV3 | DE | 16S rRNA dimethyladenosine transferase;                                                                                                                |
| N | A7GJV3 | DE | 16S rRNA dimethylase;                                                                                                                                  |
| N | A7GJV3 | DE | Ribosomal RNA small subunit methyltransferase A;                                                                                                       |
| N | A7GJV3 | DE | S-adenosylmethionine-6-N', N'-adenosyl(rRNA) dimethyltransferase;                                                                                      |
| N | A7GJV3 | DR | rRNA (adenine-N6,N6-)-dimethyltransferase activity                                                                                                     |
| N | A7GK01 | DE | Cysteine--tRNA ligase;                                                                                                                                 |
| N | A7GK01 | DE | Cysteinyl-tRNA synthetase;                                                                                                                             |
| N | A7GK01 | DR | cysteine-tRNA ligase activity                                                                                                                          |
| N | A7GK01 | DR | cysteinyl-tRNA aminoacylation                                                                                                                          |
| N | A7GK01 | DR | metal ion binding                                                                                                                                      |
| N | A7GMV2 | DE | Phosphoribosyl-ATP pyrophosphatase;                                                                                                                    |
| N | A7GMV2 | DR | histidine biosynthetic process                                                                                                                         |
| N | A7GMV2 | DR | phosphoribosyl-ATP diphosphatase activity                                                                                                              |
| N | A7GN41 | CC | GTPase that plays an essential role in the late steps of ribosome biogenesis (By similarity).                                                          |
| N | A7GN41 | DE | GTP-binding protein EngA;                                                                                                                              |
| N | A7GN41 | DR | ribosome biogenesis                                                                                                                                    |
| N | A7GRI3 | CC | Catalyzes the reversible formation of acyl-phosphate (acyl-PO(4)) from acyl-[acyl-carrier-protein] (acyl-ACP)                                          |
| N | A7GRI3 | CC | This enzyme utilizes acyl-ACP as fatty acyl donor, but not acyl-CoA (By similarity).                                                                   |
| N | A7GRI3 | DE | Acyl-ACP phosphotransacylase;                                                                                                                          |
| N | A7GRI3 | DE | Acyl-[acyl-carrier-protein]--phosphate acyltransferase;                                                                                                |
| N | A7GRI3 | DE | Phosphate acyltransferase;                                                                                                                             |
| N | A7GRI3 | DE | Phosphate-acyl-ACP acyltransferase;                                                                                                                    |
| N | A7GRI3 | DR | fatty acid biosynthetic process                                                                                                                        |
| N | A7GRI3 | DR | phospholipid biosynthetic process                                                                                                                      |
| N | A7GRI3 | DR | transferase activity, transferring acyl groups other than amino-acyl groups                                                                            |
| N | A7GYC8 | DE | Acetate kinase;                                                                                                                                        |
| N | A7GYC8 | DE | Acetokinase;                                                                                                                                           |
| N | A7GYC8 | DR | acetate kinase activity                                                                                                                                |
| N | A7GYC8 | DR | organic acid metabolic process                                                                                                                         |
| N | A7H4D8 | CC | Converts 2C-methyl-D-erythritol 2,4-cyclodiphosphate (ME-2,4cPP) into 1-hydroxy-2-methyl-2-(E)-butenyl 4-diphosphate (By similarity).                  |
| N | A7H4D8 | DE | 1-hydroxy-2-methyl-2-(E)-butenyl 4-diphosphate synthase;                                                                                               |
| N | A7H4D8 | DE | 4-hydroxy-3-methylbut-2-en-1-yl diphosphate synthase;                                                                                                  |
| N | A7H4D8 | DR | 4 iron, 4 sulfur cluster binding                                                                                                                       |
| N | A7H4D8 | DR | 4-hydroxy-3-methylbut-2-en-1-yl diphosphate synthase activity                                                                                          |
| N | A7H4D8 | DR | iron ion binding                                                                                                                                       |
| N | A7H4D8 | DR | oxidation-reduction process                                                                                                                            |
| N | A7H4D8 | DR | terpenoid biosynthetic process                                                                                                                         |

|   |         |    |                                                                                                                                                                                                       |
|---|---------|----|-------------------------------------------------------------------------------------------------------------------------------------------------------------------------------------------------------|
| N | A7H543  | CC | Catalyzes the reversible conversion of 3- phosphohydroxypyruvate to phosphoserine and of 3-hydroxy-2-oxo-4- phosphonooxybutanoate to phosphohydroxythreonine (By similarity).                         |
| N | A7H543  | DE | Phosphohydroxythreonine aminotransferase;                                                                                                                                                             |
| N | A7H543  | DE | Phosphoserine aminotransferase;                                                                                                                                                                       |
| N | A7H543  | DR | L-serine biosynthetic process                                                                                                                                                                         |
| N | A7H543  | DR | O-phospho-L-serine:2-oxoglutarate aminotransferase activity                                                                                                                                           |
| N | A7H543  | DR | pyridoxal phosphate binding                                                                                                                                                                           |
| N | A7H543  | DR | pyridoxine biosynthetic process                                                                                                                                                                       |
| N | A7HA27  | DE | Maf-like protein AnaE109_1366;                                                                                                                                                                        |
| N | A7HBM1  | CC | One of the primary rRNA binding proteins                                                                                                                                                              |
| N | A7HBM1  | CC | It has been suggested to have peptidyltransferase activity, this is somewhat controversial                                                                                                            |
| N | A7HBM1  | CC | Makes several contacts with the 16S rRNA in the 70S ribosome (By similarity).                                                                                                                         |
| N | A7HBM1  | CC | Required for association of the 30S and 50S subunits to form the 70S ribosome, for tRNA binding and peptide bond formation                                                                            |
| N | A7HBM1  | DE | 50S ribosomal protein L2;                                                                                                                                                                             |
| N | A7HBM1  | DR | structural constituent of ribosome                                                                                                                                                                    |
| N | A7HBM1  | DR | transferase activity                                                                                                                                                                                  |
| N | A7HBM2  | CC | Protein S19 forms a complex with S13 that binds strongly to the 16S ribosomal RNA (By similarity).                                                                                                    |
| N | A7HBM2  | DE | 30S ribosomal protein S19;                                                                                                                                                                            |
| N | A7HBM2  | DR | structural constituent of ribosome                                                                                                                                                                    |
| N | A7HM45  | CC | Binds 23S rRNA and is also seen to make contacts with the A and possibly P site tRNAs (By similarity).                                                                                                |
| N | A7HM45  | DE | 50S ribosomal protein L16;                                                                                                                                                                            |
| N | A7HM45  | DR | structural constituent of ribosome                                                                                                                                                                    |
| N | A7HMA1  | CC | Catalyzes the hydrolysis of pseudouridine 5'-phosphate (PsiMP) to ribose 5-phosphate and uracil (By similarity).                                                                                      |
| N | A7HMA1  | DE | Pseudouridine-5'-phosphate glycosidase;                                                                                                                                                               |
| N | A7HMA1  | DE | PsiMP glycosidase;                                                                                                                                                                                    |
| N | A7HMA1  | DR | hydrolase activity, acting on glycosyl bonds                                                                                                                                                          |
| N | A7HMA1  | DR | metal ion binding                                                                                                                                                                                     |
| N | A7HPQ2  | CC | Modifies the free amino group of the aminoacyl moiety of methionyl-tRNA (Met-tRNA)                                                                                                                    |
| N | A7HPQ2  | CC | The formyl group appears to play a dual role in the initiator identity of N-formylmethionyl-tRNA by: (I) promoting its recognition by IF2 and (II) impairing its binding to EFTu-GTP (By similarity). |
| N | A7HPQ2  | DE | Methionyl-tRNA formyltransferase;                                                                                                                                                                     |
| N | A7HPQ2  | DR | methionyl-tRNA formyltransferase activity                                                                                                                                                             |
| N | A7HPQ2  | DR | methyltransferase activity                                                                                                                                                                            |
| N | A7HVVU8 | CC | Cell wall formation (By similarity).                                                                                                                                                                  |
| N | A7HVVU8 | DE | UDP-N-acetylmuramate--L-alanine ligase;                                                                                                                                                               |
| N | A7HVVU8 | DE | UDP-N-acetylmuramoyl-L-alanine synthetase;                                                                                                                                                            |
| N | A7HVVU8 | DR | UDP-N-acetylmuramate-L-alanine ligase activity                                                                                                                                                        |
| N | A7HVVU8 | DR | cell division                                                                                                                                                                                         |
| N | A7HVVU8 | DR | cellular cell wall organization                                                                                                                                                                       |
| N | A7HVVU8 | DR | peptidoglycan biosynthetic process                                                                                                                                                                    |
| N | A7HVVU8 | DR | regulation of cell shape                                                                                                                                                                              |
| N | A7HWQ5  | CC | DNA-dependent RNA polymerase catalyzes the transcription of DNA into RNA using the four ribonucleoside triphosphates as substrates (By similarity).                                                   |
| N | A7HWQ5  | DE | DNA-directed RNA polymerase subunit beta';                                                                                                                                                            |
| N | A7HWQ5  | DE | RNA polymerase subunit beta';                                                                                                                                                                         |
| N | A7HWQ5  | DE | RNAP subunit beta';                                                                                                                                                                                   |
| N | A7HWQ5  | DE | Transcriptase subunit beta';                                                                                                                                                                          |
| N | A7HWQ5  | DR | DNA-directed RNA polymerase activity                                                                                                                                                                  |
| N | A7HX46  | CC | Transfers the 4'-phosphopantetheine moiety from coenzyme A to a Ser of acyl-carrier-protein (By similarity).                                                                                          |
| N | A7HX46  | DE | 4'-phosphopantetheinyl transferase AcpS;                                                                                                                                                              |
| N | A7HX46  | DE | Holo-ACP synthase;                                                                                                                                                                                    |
| N | A7HX46  | DE | Holo-[acyl-carrier-protein] synthase;                                                                                                                                                                 |
| N | A7HX46  | DR | fatty acid biosynthetic process                                                                                                                                                                       |
| N | A7HX46  | DR | holo-[acyl-carrier-protein] synthase activity                                                                                                                                                         |
| N | A7HX46  | DR | macromolecule biosynthetic process                                                                                                                                                                    |
| N | A7HX46  | DR | magnesium ion binding                                                                                                                                                                                 |
| N | A7HZM1  | CC | This protein binds to the 23S rRNA, and is important in its secondary structure                                                                                                                       |



|   |        |    |                                                                                                                                                                                                                                                                                                                                    |
|---|--------|----|------------------------------------------------------------------------------------------------------------------------------------------------------------------------------------------------------------------------------------------------------------------------------------------------------------------------------------|
| N | A7HZM1 | CC | It is located near the subunit interface in the base of the L7/L12 stalk, and near the tRNA binding site of the peptidyltransferase center (By similarity).                                                                                                                                                                        |
| N | A7HZM1 | DE | 50S ribosomal protein L6;                                                                                                                                                                                                                                                                                                          |
| N | A7HZM1 | DR | structural constituent of ribosome                                                                                                                                                                                                                                                                                                 |
| N | A7I1W6 | DE | 1-(5-phosphoribosyl)-5-[(5-phosphoribosylamino)methylideneamino]imidazole-4-carboxamide isomerase;                                                                                                                                                                                                                                 |
| N | A7I1W6 | DE | Phosphoribosylformimino-5-aminoimidazole carboxamide ribotide isomerase;                                                                                                                                                                                                                                                           |
| N | A7I1W6 | DR | 1-(5-phosphoribosyl)-5-[(5-phosphoribosylamino)methylideneamino]imidazole-4-carboxamide isomerase activity                                                                                                                                                                                                                         |
| N | A7I1W6 | DR | histidine biosynthetic process                                                                                                                                                                                                                                                                                                     |
| N | A7I291 | DE | 3-dehydroquinase synthase;                                                                                                                                                                                                                                                                                                         |
| N | A7I291 | DR | 3-dehydroquinase synthase activity                                                                                                                                                                                                                                                                                                 |
| N | A7I291 | DR | aromatic amino acid family biosynthetic process                                                                                                                                                                                                                                                                                    |
| N | A7IGN8 | CC | It binds to the 30S ribosomal subunit and shifts the equilibrium between 70S ribosomes and their 50S and 30S subunits in favor of the free subunits, thus enhancing the availability of 30S subunits on which protein synthesis initiation begins (By similarity).                                                                 |
| N | A7IGN8 | DE | Translation initiation factor IF-3;                                                                                                                                                                                                                                                                                                |
| N | A7IGN8 | DR | translation initiation factor activity                                                                                                                                                                                                                                                                                             |
| N | A7IIK6 | CC | This is one of the proteins that binds to the 5S RNA in the ribosome where it forms part of the central protuberance (By similarity).                                                                                                                                                                                              |
| N | A7IIK6 | DE | 50S ribosomal protein L25;                                                                                                                                                                                                                                                                                                         |
| N | A7IIK6 | DE | General stress protein CTC;                                                                                                                                                                                                                                                                                                        |
| N | A7IIK6 | DR | 5S rRNA binding                                                                                                                                                                                                                                                                                                                    |
| N | A7IIK6 | DR | structural constituent of ribosome                                                                                                                                                                                                                                                                                                 |
| N | A7M9A4 | DE | 50S ribosomal protein L2, plastid;                                                                                                                                                                                                                                                                                                 |
| N | A7M9A4 | DR | structural constituent of ribosome                                                                                                                                                                                                                                                                                                 |
| N | A7M9A4 | DR | transferase activity                                                                                                                                                                                                                                                                                                               |
| N | A7MB45 | CC | Activates acetate so that it can be used for lipid synthesis or for energy generation (By similarity).                                                                                                                                                                                                                             |
| N | A7MB45 | DE | Acyl-CoA synthetase short-chain family member 3, mitochondrial;                                                                                                                                                                                                                                                                    |
| N | A7MB45 | DR | acetate-CoA ligase activity                                                                                                                                                                                                                                                                                                        |
| N | A7MBG3 | CC | Potent and specific inhibitor of CaM-kinase II (CAMK2) (By similarity).                                                                                                                                                                                                                                                            |
| N | A7MBG3 | DE | Calcium/calmodulin-dependent protein kinase II inhibitor 1;                                                                                                                                                                                                                                                                        |
| N | A7MBG3 | DR | protein kinase inhibitor activity                                                                                                                                                                                                                                                                                                  |
| N | A7ME52 | CC | Catalyzes the pyrimidine ring opening between N-3 and C-4 by an unusual flavin hydroperoxide-catalyzed mechanism to yield ureidoacrylate peracid. It cleaves pyrimidine rings directly by adding oxygen atoms, making a toxic ureidoacrylate peracid product which can be spontaneously reduced to ureidoacrylate (By similarity). |
| N | A7ME52 | CC | Pyrimidine monooxygenase RutA;                                                                                                                                                                                                                                                                                                     |
| N | A7ME52 | DE | oxidation-reduction process                                                                                                                                                                                                                                                                                                        |
| N | A7ME52 | DR | oxidoreductase activity, acting on paired donors, with incorporation or reduction of molecular oxygen, reduced flavin or flavoprotein as one donor, and incorporation of one atom of oxygen                                                                                                                                        |
| N | A7MEU5 | CC | Involved in chromosome condensation, segregation and cell cycle progression                                                                                                                                                                                                                                                        |
| N | A7MEU5 | CC | It has a calcium binding activity (By similarity).                                                                                                                                                                                                                                                                                 |
| N | A7MEU5 | CC | May participate in facilitating chromosome segregation by condensation DNA from both sides of a centrally located replisome during cell division                                                                                                                                                                                   |
| N | A7MEU5 | CC | Not required for mini-F plasmid partitioning                                                                                                                                                                                                                                                                                       |
| N | A7MEU5 | CC | Overexpression results in anucleate cells                                                                                                                                                                                                                                                                                          |
| N | A7MEU5 | CC | Probably acts via its interaction with mukB and mukE                                                                                                                                                                                                                                                                               |
| N | A7MEU5 | DE | Chromosome partition protein mukF;                                                                                                                                                                                                                                                                                                 |
| N | A7MEU5 | DR | DNA replication                                                                                                                                                                                                                                                                                                                    |
| N | A7MEU5 | DR | calcium ion binding                                                                                                                                                                                                                                                                                                                |
| N | A7MEU5 | DR | cell division                                                                                                                                                                                                                                                                                                                      |
| N | A7MEU5 | DR | chromosome condensation                                                                                                                                                                                                                                                                                                            |
| N | A7MEU5 | DR | chromosome segregation                                                                                                                                                                                                                                                                                                             |
| N | A7MGV3 | CC | Specifically methylates position 2 of adenine 2503 in 23S rRNA (By similarity).                                                                                                                                                                                                                                                    |
| N | A7MGV3 | DE | 23S rRNA m2A2503 methyltransferase;                                                                                                                                                                                                                                                                                                |
| N | A7MGV3 | DE | Ribosomal RNA large subunit methyltransferase N;                                                                                                                                                                                                                                                                                   |
| N | A7MGV3 | DR | 4 iron, 4 sulfur cluster binding                                                                                                                                                                                                                                                                                                   |
| N | A7MGV3 | DR | RNA methyltransferase activity                                                                                                                                                                                                                                                                                                     |
| N | A7MGV3 | DR | metal ion binding                                                                                                                                                                                                                                                                                                                  |
| N | A7MGV3 | DR | rRNA processing                                                                                                                                                                                                                                                                                                                    |
| N | A7MH52 | CC | Component of the acetyl coenzyme A carboxylase (ACC) complex                                                                                                                                                                                                                                                                       |

|   |        |    |                                                                                                                                                                                                                |
|---|--------|----|----------------------------------------------------------------------------------------------------------------------------------------------------------------------------------------------------------------|
| N | A7MH52 | CC | Biotin carboxylase (BC) catalyzes the carboxylation of biotin on its carrier protein (BCCP) and then the CO(2) group is transferred by the transcarboxylase to acetyl-CoA to form malonyl-CoA (By similarity). |
| N | A7MH52 | DE | ACCase subunit beta;                                                                                                                                                                                           |
| N | A7MH52 | DE | Acetyl-CoA carboxylase carboxyltransferase subunit beta;                                                                                                                                                       |
| N | A7MH52 | DE | Acetyl-coenzyme A carboxylase carboxyl transferase subunit beta;                                                                                                                                               |
| N | A7MH52 | DR | acetyl-CoA carboxylase activity                                                                                                                                                                                |
| N | A7MH52 | DR | fatty acid biosynthetic process                                                                                                                                                                                |
| N | A7MH52 | DR | metal ion binding                                                                                                                                                                                              |
| N | A7MIB1 | DE | Protein ApaG;                                                                                                                                                                                                  |
| N | A7MK12 | CC | Catalyzes 2 different reactions between oxygene and the acireductone 1,2-dihydroxy-3-keto-5-methylthiopentene (DHK-MTPene) depending upon the metal bound in the active site                                   |
| N | A7MK12 | CC | Fe-containing acireductone dioxygenase (Fe-ARD) produces formate and 2-keto-4- methylthiobutyrate (KMTB), the alpha-ketoacid precursor of methionine in the methionine recycle pathway                         |
| N | A7MK12 | CC | Ni-containing acireductone dioxygenase (Ni-ARD) produces methylthiopropionate, carbon monoxide and formate, and does not lie on the methionine recycle pathway (By similarity).                                |
| N | A7MK12 | DE | 1,2-dihydroxy-3-keto-5-methylthiopentene dioxygenase;                                                                                                                                                          |
| N | A7MK12 | DE | Acireductone dioxygenase (Fe(2+)-requiring);                                                                                                                                                                   |
| N | A7MK12 | DE | Acireductone dioxygenase (Ni(2+)-requiring);                                                                                                                                                                   |
| N | A7MK12 | DE | Acireductone dioxygenase;                                                                                                                                                                                      |
| N | A7MK12 | DE | DHK-MTPene dioxygenase;                                                                                                                                                                                        |
| N | A7MK12 | DR | L-methionine salvage from methylthioadenosine                                                                                                                                                                  |
| N | A7MK12 | DR | acireductone dioxygenase (Ni2+-requiring) activity                                                                                                                                                             |
| N | A7MK12 | DR | acireductone dioxygenase [iron(II)-requiring] activity                                                                                                                                                         |
| N | A7MK12 | DR | metal ion binding                                                                                                                                                                                              |
| N | A7MK12 | DR | oxidation-reduction process                                                                                                                                                                                    |
| N | A7MP89 | DE | UPF0235 protein ESA_00387;                                                                                                                                                                                     |
| N | A7MVW6 | CC | Catalyzes the synthesis of alpha-ribazole-5'-phosphate from nicotinate mononucleotide (NAMN) and 5,6- dimethylbenzimidazole (DMB).                                                                             |
| N | A7MVW6 | DE | N(1)-alpha-phosphoribosyltransferase;                                                                                                                                                                          |
| N | A7MVW6 | DE | NN:DBI PRT;                                                                                                                                                                                                    |
| N | A7MVW6 | DE | Nicotinate-nucleotide--dimethylbenzimidazole phosphoribosyltransferase;                                                                                                                                        |
| N | A7MVW6 | DR | cobalamin biosynthetic process                                                                                                                                                                                 |
| N | A7MVW6 | DR | nicotinate-nucleotide-dimethylbenzimidazole phosphoribosyltransferase activity                                                                                                                                 |
| N | A7MVW6 | DR | nucleoside biosynthetic process                                                                                                                                                                                |
| N | A7MX54 | CC | Prevents misfolding and promotes the refolding and proper assembly of unfolded polypeptides generated under stress conditions (By similarity).                                                                 |
| N | A7MX54 | DE | 60 kDa chaperonin;                                                                                                                                                                                             |
| N | A7MX54 | DE | GroEL protein;                                                                                                                                                                                                 |
| N | A7MX54 | DE | Protein Cpn60;                                                                                                                                                                                                 |
| N | A7MX54 | DR | protein refolding                                                                                                                                                                                              |
| N | A7N0W0 | DE | DAP epimerase;                                                                                                                                                                                                 |
| N | A7N0W0 | DE | Diaminopimelate epimerase;                                                                                                                                                                                     |
| N | A7N0W0 | DR | diaminopimelate epimerase activity                                                                                                                                                                             |
| N | A7N0W0 | DR | lysine biosynthetic process via diaminopimelate                                                                                                                                                                |
| N | A7N141 | CC | Catalyzes the synthesis of the hydroxymethylpyrimidine phosphate (HMP-P) moiety of thiamine from aminoimidazole ribotide (AIR) in a radical S-adenosyl-L-methionine (SAM)-dependent reaction (By similarity).  |
| N | A7N141 | DE | HMP-P synthase;                                                                                                                                                                                                |
| N | A7N141 | DE | HMP-phosphate synthase;                                                                                                                                                                                        |
| N | A7N141 | DE | HMPP synthase;                                                                                                                                                                                                 |
| N | A7N141 | DE | Hydroxymethylpyrimidine phosphate synthase;                                                                                                                                                                    |
| N | A7N141 | DE | Phosphomethylpyrimidine synthase;                                                                                                                                                                              |
| N | A7N141 | DE | Thiamine biosynthesis protein thiC;                                                                                                                                                                            |
| N | A7N141 | DR | 4 iron, 4 sulfur cluster binding                                                                                                                                                                               |
| N | A7N141 | DR | lyase activity                                                                                                                                                                                                 |
| N | A7N141 | DR | metal ion binding                                                                                                                                                                                              |
| N | A7N141 | DR | thiamine biosynthetic process                                                                                                                                                                                  |
| N | A7NBV5 | CC | The ruvA-ruvB complex in the presence of ATP renatures cruciform structure in supercoiled DNA with palindromic sequence, indicating that it may promote strand exchange reactions in homologous recombination  |

|   |         |    |                                                                                                                                                                                                                                         |
|---|---------|----|-----------------------------------------------------------------------------------------------------------------------------------------------------------------------------------------------------------------------------------------|
| N | A7NBV5  | CC | RuvA stimulates, in the presence of DNA, the weak ATPase activity of ruvB (By similarity).                                                                                                                                              |
| N | A7NBV5  | CC | RuvAB is an helicase that mediates the Holliday junction migration by localized denaturation and reannealing                                                                                                                            |
| N | A7NBV5  | DE | Holliday junction ATP-dependent DNA helicase ruvA;                                                                                                                                                                                      |
| N | A7NBV5  | DR | DNA recombination                                                                                                                                                                                                                       |
| N | A7NBV5  | DR | four-way junction helicase activity                                                                                                                                                                                                     |
| N | A7ND08  | CC | Catalyzes the ATP-dependent amination of UTP to CTP with either L-glutamine or ammonia as the source of nitrogen (By similarity).                                                                                                       |
| N | A7ND08  | DE | CTP synthase;                                                                                                                                                                                                                           |
| N | A7ND08  | DE | CTP synthetase;                                                                                                                                                                                                                         |
| N | A7ND08  | DE | UTP--ammonia ligase;                                                                                                                                                                                                                    |
| N | A7ND08  | DR | CTP synthase activity                                                                                                                                                                                                                   |
| N | A7ND08  | DR | glutamine metabolic process                                                                                                                                                                                                             |
| N | A7ND08  | DR | pyrimidine nucleotide biosynthetic process                                                                                                                                                                                              |
| N | A7NFC5  | CC | Necessary for efficient RNA polymerase transcription elongation past template-encoded arresting sites                                                                                                                                   |
| N | A7NFC5  | CC | Cleavage of the nascent transcript by cleavage factors such as greA or greB allows the resumption of elongation from the new 3'terminus                                                                                                 |
| N | A7NFC5  | CC | GreA releases sequences of 2 to 3 nucleotides (By similarity). The arresting sites in DNA have the property of trapping a certain fraction of elongating RNA polymerases that pass through, resulting in locked ternary complexes       |
| N | A7NFC5  | DE | Transcript cleavage factor greA;                                                                                                                                                                                                        |
| N | A7NFC5  | DE | Transcription elongation factor greA;                                                                                                                                                                                                   |
| N | A7NFC5  | DR | transcription elongation regulator activity                                                                                                                                                                                             |
| N | A7NKV1  | DE | Glutamate-1-semialdehyde 2,1-aminomutase;                                                                                                                                                                                               |
| N | A7NKV1  | DE | Glutamate-1-semialdehyde aminotransferase;                                                                                                                                                                                              |
| N | A7NKV1  | DR | chlorophyll biosynthetic process                                                                                                                                                                                                        |
| N | A7NKV1  | DR | glutamate-1-semialdehyde 2,1-aminomutase activity                                                                                                                                                                                       |
| N | A7NKV1  | DR | pyridoxal phosphate binding                                                                                                                                                                                                             |
| N | A7NKV1  | DR | transaminase activity                                                                                                                                                                                                                   |
| N | A7NPD6  | CC | NDH-1 shuttles electrons from NADH, via FMN and iron- sulfur (Fe-S) centers, to quinones in the respiratory chain                                                                                                                       |
| N | A7NPD6  | CC | Couples the redox reaction to proton translocation (for every two electrons transferred, four hydrogen ions are translocated across the cytoplasmic membrane), and thus conserves the redox energy in a proton gradient (By similarity) |
| N | A7NPD6  | CC | The immediate electron acceptor for the enzyme in this species is believed to be ubiquinone                                                                                                                                             |
| N | A7NPD6  | DE | NADH dehydrogenase I subunit N 2;                                                                                                                                                                                                       |
| N | A7NPD6  | DE | NADH-quinone oxidoreductase subunit N 2;                                                                                                                                                                                                |
| N | A7NPD6  | DE | NDH-1 subunit N 2;                                                                                                                                                                                                                      |
| N | A7NPD6  | DR | ATP synthesis coupled electron transport                                                                                                                                                                                                |
| N | A7NPD6  | DR | NADH dehydrogenase (ubiquinone) activity                                                                                                                                                                                                |
| N | A7NPD6  | DR | quinone binding                                                                                                                                                                                                                         |
| N | A7S6Y0  | CC | Involved in protein trafficking (By similarity).                                                                                                                                                                                        |
| N | A7S6Y0  | DE | Protein SYS1 homolog;                                                                                                                                                                                                                   |
| N | A7S6Y0  | DR | protein transport                                                                                                                                                                                                                       |
| N | A7TJT3  | CC | Regulator of type 1 phosphatases which maintains protein phosphatase activity under strict control (By similarity).                                                                                                                     |
| N | A7TJT3  | DE | Type 1 phosphatases regulator YPI2;                                                                                                                                                                                                     |
| N | A7TR79  | CC | Catalyzes the cleavage of L-kynurenine (L-Kyn) and L-3- hydroxykynurenine (L-3OHKyn) into anthranilic acid (AA) and 3- hydroxyanthranilic acid (3-OHAA), respectively (By similarity).                                                  |
| N | A7TR79  | DE | Biosynthesis of nicotinic acid protein 5;                                                                                                                                                                                               |
| N | A7TR79  | DE | Kynureninase;                                                                                                                                                                                                                           |
| N | A7TR79  | DE | L-kynurenine hydrolase;                                                                                                                                                                                                                 |
| N | A7TR79  | DR | NAD biosynthetic process                                                                                                                                                                                                                |
| N | A7TR79  | DR | kynureninase activity                                                                                                                                                                                                                   |
| N | A7TR79  | DR | pyridoxal phosphate binding                                                                                                                                                                                                             |
| N | A7TR79  | DR | tryptophan catabolic process                                                                                                                                                                                                            |
| N | A7TZG3  | CC | May act by engaging a cell surface molecule on immature T-cells in the embryonic thymus (By similarity).                                                                                                                                |
| N | A7TZG3  | DE | Selection and upkeep of intraepithelial T-cells protein 9;                                                                                                                                                                              |
| N | A7WXXZ6 | CC | Converts N-acetylmannosamine-6-phosphate (ManNAc-6-P) to N-acetylglucosamine-6-phosphate (GlcNAc-6-P) (Potential).                                                                                                                      |

|   |        |    |                                                                                                                                                                                                                                             |
|---|--------|----|---------------------------------------------------------------------------------------------------------------------------------------------------------------------------------------------------------------------------------------------|
| N | A7WXZ6 | DE | ManNAc-6-P epimerase;                                                                                                                                                                                                                       |
| N | A7WXZ6 | DE | Putative N-acetylmannosamine-6-phosphate 2-epimerase;                                                                                                                                                                                       |
| N | A7WXZ6 | DR | N-acetylmannosamine metabolic process                                                                                                                                                                                                       |
| N | A7WXZ6 | DR | N-acylglucosamine-6-phosphate 2-epimerase activity                                                                                                                                                                                          |
| N | A7WYX4 | CC | Catalyzes the GTP-dependent ribosomal translocation step during translation elongation                                                                                                                                                      |
| N | A7WYX4 | CC | Catalyzes the coordinated movement of the two tRNA molecules, the mRNA and conformational changes in the ribosome (By similarity).                                                                                                          |
| N | A7WYX4 | CC | During this step, the ribosome changes from the pre-translocational (PRE) to the post- translocational (POST) state as the newly formed A-site-bound peptidyl-tRNA and P-site-bound deacylated tRNA move to the P and E sites, respectively |
| N | A7WYX4 | DE | Elongation factor G;                                                                                                                                                                                                                        |
| N | A7WYX4 | DR | GTPase activity                                                                                                                                                                                                                             |
| N | A7WYX4 | DR | translation elongation factor activity                                                                                                                                                                                                      |
| N | A7X2W2 | CC | Catalyzes the attachment of glycine to tRNA(Gly) (By similarity).                                                                                                                                                                           |
| N | A7X2W2 | DE | Glycine--tRNA ligase;                                                                                                                                                                                                                       |
| N | A7X2W2 | DE | Glycyl-tRNA synthetase;                                                                                                                                                                                                                     |
| N | A7X2W2 | DR | glycine-tRNA ligase activity                                                                                                                                                                                                                |
| N | A7X2W2 | DR | glycyl-tRNA aminoacylation                                                                                                                                                                                                                  |
| N | A7X2W2 | DR | protein dimerization activity                                                                                                                                                                                                               |
| N | A7X364 | CC | This protein binds to 23S rRNA in the presence of protein L20 (By similarity).                                                                                                                                                              |
| N | A7X364 | DE | 50S ribosomal protein L21;                                                                                                                                                                                                                  |
| N | A7X364 | DR | structural constituent of ribosome                                                                                                                                                                                                          |
| N | A7X3T8 | CC | Catalyzes the decarboxylation of four acetate groups of uroporphyrinogen-III to yield coproporphyrinogen-III (By similarity).                                                                                                               |
| N | A7X3T8 | DE | Uroporphyrinogen decarboxylase;                                                                                                                                                                                                             |
| N | A7X3T8 | DR | porphyrin biosynthetic process                                                                                                                                                                                                              |
| N | A7X3T8 | DR | uroporphyrinogen decarboxylase activity                                                                                                                                                                                                     |
| N | A7XYQ1 | CC | Implicated in development of the cochlea (By similarity).                                                                                                                                                                                   |
| N | A7XYQ1 | DE | Jackson circler protein 1;                                                                                                                                                                                                                  |
| N | A7XYQ1 | DE | Sine oculis-binding protein homolog;                                                                                                                                                                                                        |
| N | A7XYQ1 | DR | metal ion binding                                                                                                                                                                                                                           |
| N | A7YW81 | DE | Transmembrane protein 234;                                                                                                                                                                                                                  |
| N | A7YY62 | CC | Component of the FTS/Hook/FHIP complex (FHF complex)<br>The FHF complex may function to promote vesicle trafficking and/or fusion via the homotypic vesicular protein sorting complex (the HOPS complex) (By similarity)                    |
| N | A7YY62 | CC | FTS and Hook-interacting protein;                                                                                                                                                                                                           |
| N | A7YY62 | DE | Protein FAM160A2;                                                                                                                                                                                                                           |
| N | A7YY62 | DR | early endosome to late endosome transport                                                                                                                                                                                                   |
| N | A7YY62 | DR | endosome organization                                                                                                                                                                                                                       |
| N | A7YY62 | DR | endosome to lysosome transport                                                                                                                                                                                                              |
| N | A7YY62 | DR | lysosome organization                                                                                                                                                                                                                       |
| N | A7YY62 | DR | protein transport                                                                                                                                                                                                                           |
| N | A7Z259 | CC | Probable prenyltransferase that may catalyze the transfer of a prenyl moiety to sn-glycerol-1-phosphate (GIP) (By similarity).                                                                                                              |
| N | A7Z259 | DE | Putative glycerol-1-phosphate prenyltransferase;                                                                                                                                                                                            |
| N | A7Z259 | DR | metal ion binding                                                                                                                                                                                                                           |
| N | A7Z259 | DR | phospholipid biosynthetic process                                                                                                                                                                                                           |
| N | A7Z259 | DR | transferase activity, transferring alkyl or aryl (other than methyl) groups                                                                                                                                                                 |
| N | A7Z8R4 | CC | Transporter involved in the efflux of sodium, potassium, lithium and rubidium (By similarity).                                                                                                                                              |
| N | A7Z8R4 | DE | Sodium, potassium, lithium and rubidium/H(+) antiporter;                                                                                                                                                                                    |
| N | A7Z8R4 | DR | intracellular protein transport                                                                                                                                                                                                             |
| N | A7Z8R4 | DR | potassium ion transport                                                                                                                                                                                                                     |
| N | A7Z8R4 | DR | sodium ion transport                                                                                                                                                                                                                        |
| N | A7Z8R4 | DR | solute:hydrogen antiporter activity                                                                                                                                                                                                         |
| N | A7Z8R5 | CC | Component of the sulfite reductase complex that catalyzes the 6-electron reduction of sulfite to sulfide                                                                                                                                    |
| N | A7Z8R5 | CC | This is one of several activities required for the biosynthesis of L- cysteine from sulfate (By similarity).                                                                                                                                |
| N | A7Z8R5 | DE | Sulfite reductase [NADPH] hemoprotein beta-component;                                                                                                                                                                                       |
| N | A7Z8R5 | DR | 4 iron, 4 sulfur cluster binding                                                                                                                                                                                                            |
| N | A7Z8R5 | DR | cysteine biosynthetic process                                                                                                                                                                                                               |
| N | A7Z8R5 | DR | oxidation-reduction process                                                                                                                                                                                                                 |
| N | A7Z8R5 | DR | sulfite reductase (NADPH) activity                                                                                                                                                                                                          |

|   |        |    |                                                                                                                                                                                                        |
|---|--------|----|--------------------------------------------------------------------------------------------------------------------------------------------------------------------------------------------------------|
| N | A7ZCN6 | CC | Seems to be the binding site for several of the factors involved in protein synthesis and appears to be essential for accurate translation (By similarity).                                            |
| N | A7ZCN6 | DE | 50S ribosomal protein L7/L12;                                                                                                                                                                          |
| N | A7ZCN6 | DR | structural constituent of ribosome                                                                                                                                                                     |
| N | A7ZD62 | CC | Key component of the proton channel; it plays a direct role in the translocation of protons across the membrane (By similarity).                                                                       |
| N | A7ZD62 | DE | ATP synthase F0 sector subunit a;                                                                                                                                                                      |
| N | A7ZD62 | DE | ATP synthase subunit a;                                                                                                                                                                                |
| N | A7ZD62 | DE | F-ATPase subunit 6;                                                                                                                                                                                    |
| N | A7ZD62 | DR | ATP synthesis coupled proton transport                                                                                                                                                                 |
| N | A7ZD62 | DR | hydrogen ion transmembrane transporter activity                                                                                                                                                        |
| N | A7ZEH3 | DE | Aspartate--tRNA ligase;                                                                                                                                                                                |
| N | A7ZEH3 | DE | Aspartyl-tRNA synthetase;                                                                                                                                                                              |
| N | A7ZEH3 | DR | aspartate-tRNA ligase activity                                                                                                                                                                         |
| N | A7ZEH3 | DR | aspartyl-tRNA aminoacylation                                                                                                                                                                           |
| N | A7ZEH3 | DR | nucleic acid binding                                                                                                                                                                                   |
| N | A7ZI51 | DE | Betaine aldehyde dehydrogenase;                                                                                                                                                                        |
| N | A7ZI51 | DR | betaine biosynthetic process                                                                                                                                                                           |
| N | A7ZI51 | DR | betaine-aldehyde dehydrogenase activity                                                                                                                                                                |
| N | A7ZI51 | DR | oxidation-reduction process                                                                                                                                                                            |
| N | A7ZIN6 | CC | Displays esterase activity towards short chain fatty esters (acyl chain length of up to 8 carbons)                                                                                                     |
| N | A7ZIN6 | CC | Able to hydrolyze triacetylgllycerol (triacetin) and tributylglycerol (tributyrin), but not trioleylglycerol (triolein) or cholesterol oleate                                                          |
| N | A7ZIN6 | CC | Inhibits melA galactosidase activity (By similarity).                                                                                                                                                  |
| N | A7ZIN6 | CC | Negatively regulates malT activity by antagonizing maltotriose binding                                                                                                                                 |
| N | A7ZIN6 | DE | Acetyl esterase;                                                                                                                                                                                       |
| N | A7ZIN6 | DR | carboxylesterase activity                                                                                                                                                                              |
| N | A7ZIN6 | DR | protein homodimerization activity                                                                                                                                                                      |
| N | A7ZSH6 | CC | Modifies the free amino group of the aminoacyl moiety of methionyl-tRNA (fMet).                                                                                                                        |
| N | A7ZSH6 | CC | The formyl group appears to play a dual role in the initiator identity of N-formylmethionyl-tRNA by: (I) promoting its recognition by IF2 and (II) impairing its binding to EF-Tu-GTP (By similarity). |
| N | A7ZSH6 | DE | Methionyl-tRNA formyltransferase;                                                                                                                                                                      |
| N | A7ZSH6 | DR | methionyl-tRNA formyltransferase activity                                                                                                                                                              |
| N | A7ZSH6 | DR | methyltransferase activity                                                                                                                                                                             |
| N | A7ZUA1 | CC | Necessary for formate dehydrogenase activity (By similarity).                                                                                                                                          |
| N | A7ZUA1 | DE | Protein FdhE;                                                                                                                                                                                          |
| N | A7ZVS4 | CC | Catalyzes a reversible aldol reaction between acetaldehyde and D-glyceraldehyde 3-phosphate to generate 2-deoxy- D-ribose 5-phosphate (By similarity).                                                 |
| N | A7ZVS4 | DE | 2-deoxy-D-ribose 5-phosphate aldolase;                                                                                                                                                                 |
| N | A7ZVS4 | DE | Deoxyriboaldolase;                                                                                                                                                                                     |
| N | A7ZVS4 | DE | Deoxyribose-phosphate aldolase;                                                                                                                                                                        |
| N | A7ZVS4 | DE | Phosphodeoxyriboaldolase;                                                                                                                                                                              |
| N | A7ZVS4 | DR | deoxyribonucleotide catabolic process                                                                                                                                                                  |
| N | A7ZVS4 | DR | deoxyribose-phosphate aldolase activity                                                                                                                                                                |
| N | A7ZW53 | DE | UPF0289 protein yacF;                                                                                                                                                                                  |
| N | A7ZWB6 | CC | Associates with the EF-Tu.GDP complex and induces the exchange of GDP to GTP.                                                                                                                          |
| N | A7ZWB6 | CC | It remains bound to the aminoacyl-tRNA.EF- Tu.GTP complex up to the GTP hydrolysis stage on the ribosome.                                                                                              |
| N | A7ZWB6 | DE | Elongation factor Ts;                                                                                                                                                                                  |
| N | A7ZWB6 | DR | translation elongation factor activity                                                                                                                                                                 |
| N | A7ZXR8 | DE | Leucine--tRNA ligase;                                                                                                                                                                                  |
| N | A7ZXR8 | DE | Leucyl-tRNA synthetase;                                                                                                                                                                                |
| N | A7ZXR8 | DR | leucine-tRNA ligase activity                                                                                                                                                                           |
| N | A7ZXR8 | DR | leucyl-tRNA aminoacylation                                                                                                                                                                             |
| N | A7ZYM0 | CC | Activates KDO (a required 8-carbon sugar) for incorporation into bacterial lipopolysaccharide in Gram-negative bacteria (By similarity).                                                               |
| N | A7ZYM0 | DE | 3-deoxy-manno-octulosonate cytidyltransferase;                                                                                                                                                         |
| N | A7ZYM0 | DE | CMP-2-keto-3-deoxyoctulosonic acid synthase;                                                                                                                                                           |
| N | A7ZYM0 | DE | CMP-KDO synthase;                                                                                                                                                                                      |
| N | A7ZYM0 | DR | 3-deoxy-manno-octulosonate cytidyltransferase activity                                                                                                                                                 |
| N | A7ZYM0 | DR | lipopolysaccharide biosynthetic process                                                                                                                                                                |
| N | A7ZZE5 | CC | Plays a critical role in the incorporation of lipoproteins in the outer membrane after they are released by the lola protein (By similarity).                                                          |

|   |        |    |                                                                                                                                                                                     |
|---|--------|----|-------------------------------------------------------------------------------------------------------------------------------------------------------------------------------------|
| N | A7ZZE5 | DE | Outer-membrane lipoprotein lolB;                                                                                                                                                    |
| N | A7ZZE5 | DR | protein transport                                                                                                                                                                   |
| N | A8A1F4 | DE | Protein dsrB;                                                                                                                                                                       |
| N | A8A1J6 | CC | Involved in the regulation of ptsG expression by binding and inactivating mlc (By similarity).                                                                                      |
| N | A8A1J6 | DE | Mlc titration factor A;                                                                                                                                                             |
| N | A8A1J6 | DE | Protein mtfA;                                                                                                                                                                       |
| N | A8A2L0 | CC | Catalyzes the formation of an hydroxyacyl-CoA by addition of water on enoyl-CoA                                                                                                     |
| N | A8A2L0 | CC | Also exhibits 3-hydroxyacyl-CoA epimerase and 3-hydroxyacyl-CoA dehydrogenase activities (By similarity).                                                                           |
| N | A8A2L0 | DE | 3-hydroxyacyl-CoA dehydrogenase;                                                                                                                                                    |
| N | A8A2L0 | DE | Enoyl-CoA hydratase/3-hydroxybutyryl-CoA epimerase;                                                                                                                                 |
| N | A8A2L0 | DE | Fatty acid oxidation complex subunit alpha;                                                                                                                                         |
| N | A8A2L0 | DR | 3-hydroxyacyl-CoA dehydrogenase activity                                                                                                                                            |
| N | A8A2L0 | DR | 3-hydroxybutyryl-CoA epimerase activity                                                                                                                                             |
| N | A8A2L0 | DR | enoyl-CoA hydratase activity                                                                                                                                                        |
| N | A8A2L0 | DR | fatty acid beta-oxidation                                                                                                                                                           |
| N | A8A3B5 | CC | An accessory protein needed during the final step in the assembly of 30S ribosomal subunit, possibly for assembly of the head region                                                |
| N | A8A3B5 | CC | Essential for efficient processing of 16S rRNA                                                                                                                                      |
| N | A8A3B5 | CC | It has affinity for free ribosomal 30S subunits but not for 70S ribosomes (By similarity)                                                                                           |
| N | A8A3B5 | CC | May be needed both before and after rbfA during the maturation of 16S rRNA                                                                                                          |
| N | A8A3B5 | CC | Probably interacts with S19                                                                                                                                                         |
| N | A8A3B5 | DE | Ribosome maturation factor rimM;                                                                                                                                                    |
| N | A8A3B5 | DR | rRNA processing                                                                                                                                                                     |
| N | A8A3B5 | DR | ribosome binding                                                                                                                                                                    |
| N | A8A7N9 | CC | Prevents misfolding and promotes the refolding and proper assembly of unfolded polypeptides generated under stress conditions (By similarity).                                      |
| N | A8A7N9 | DE | 60 kDa chaperonin;                                                                                                                                                                  |
| N | A8A7N9 | DE | GroEL protein;                                                                                                                                                                      |
| N | A8A7N9 | DE | Protein Cpn60;                                                                                                                                                                      |
| N | A8A7N9 | DR | protein refolding                                                                                                                                                                   |
| N | A8A7Q8 | CC | May play a role in 30S ribosomal subunit biogenesis                                                                                                                                 |
| N | A8A7Q8 | CC | Unusual circularly permuted GTPase that catalyzes rapid hydrolysis of GTP with a slow catalytic turnover (By similarity).                                                           |
| N | A8A7Q8 | DE | Putative ribosome biogenesis GTPase RsgA;                                                                                                                                           |
| N | A8A7Q8 | DR | GTPase activity                                                                                                                                                                     |
| N | A8A7Q8 | DR | metal ion binding                                                                                                                                                                   |
| N | A8A803 | DE | Aspartate carbamoyltransferase;                                                                                                                                                     |
| N | A8A803 | DE | Aspartate transcarbamylase;                                                                                                                                                         |
| N | A8A803 | DR | 'de novo' pyrimidine base biosynthetic process                                                                                                                                      |
| N | A8A803 | DR | amino acid binding                                                                                                                                                                  |
| N | A8A803 | DR | aspartate carbamoyltransferase activity                                                                                                                                             |
| N | A8A803 | DR | cellular amino acid metabolic process                                                                                                                                               |
| N | A8A803 | DR | pyrimidine nucleotide biosynthetic process                                                                                                                                          |
| N | A8A9B8 | CC | Selectively cleaves double-stranded DNA at the second phosphodiester bond 3' to a deoxyinosine leaving behind the intact lesion on the nicked DNA                                   |
| N | A8A9B8 | CC | Acts in DNA repair (By similarity).                                                                                                                                                 |
| N | A8A9B8 | DE | Deoxyinosine 3'endonuclease;                                                                                                                                                        |
| N | A8A9B8 | DE | Deoxyribonuclease V;                                                                                                                                                                |
| N | A8A9B8 | DE | Endonuclease V;                                                                                                                                                                     |
| N | A8A9B8 | DR | deoxyribonuclease V activity                                                                                                                                                        |
| N | A8ACP7 | CC | NAD-binding protein involved in the addition of a carboxymethylaminomethyl (cmnm) group at the wobble position (U34) of certain tRNAs, forming tRNA-cmnm(5)s(2)U34 (By similarity). |
| N | A8ACP7 | DE | Glucose-inhibited division protein A;                                                                                                                                               |
| N | A8ACP7 | DE | tRNA uridine 5-carboxymethylaminomethyl modification enzyme MnmG;                                                                                                                   |
| N | A8ACP7 | DR | flavin adenine dinucleotide binding                                                                                                                                                 |
| N | A8ACP7 | DR | tRNA wobble uridine modification                                                                                                                                                    |
| N | A8ACZ6 | CC | Splits dipeptides with a prolyl residue in the C- terminal position (By similarity).                                                                                                |
| N | A8ACZ6 | DE | Imidodipeptidase;                                                                                                                                                                   |
| N | A8ACZ6 | DE | Proline dipeptidase;                                                                                                                                                                |
| N | A8ACZ6 | DE | X-Pro dipeptidase;                                                                                                                                                                  |
| N | A8ACZ6 | DE | Xaa-Pro dipeptidase;                                                                                                                                                                |
| N | A8ACZ6 | DR | cellular process                                                                                                                                                                    |

|   |        |    |                                                                                                                                                                                                                  |
|---|--------|----|------------------------------------------------------------------------------------------------------------------------------------------------------------------------------------------------------------------|
| N | A8ACZ6 | DR | dipeptidase activity                                                                                                                                                                                             |
| N | A8ACZ6 | DR | metal ion binding                                                                                                                                                                                                |
| N | A8ACZ6 | DR | metalloexopeptidase activity                                                                                                                                                                                     |
| N | A8ACZ6 | DR | phosphoric triester hydrolase activity                                                                                                                                                                           |
| N | A8AHW5 | CC | Regulator of peptidoglycan synthesis that is essential for the function of penicillin-binding protein 1B (PBP1b) (By similarity).                                                                                |
| N | A8AHW5 | DE | PBP activator LpoB;                                                                                                                                                                                              |
| N | A8AHW5 | DE | Penicillin-binding protein activator LpoB;                                                                                                                                                                       |
| N | A8AHW5 | DR | peptidoglycan biosynthetic process                                                                                                                                                                               |
| N | A8AHW5 | DR | regulation of cell shape                                                                                                                                                                                         |
| N | A8AUJ7 | CC | PRODUCES ATP FROM ADP IN THE PRESENCE OF A PROTON GRADIENT ACROSS THE MEMBRANE                                                                                                                                   |
| N | A8AUJ7 | CC | The V-type alpha chain is a catalytic subunit (By similarity).                                                                                                                                                   |
| N | A8AUJ7 | DE | V-ATPase subunit A;                                                                                                                                                                                              |
| N | A8AUJ7 | DE | V-type ATP synthase alpha chain;                                                                                                                                                                                 |
| N | A8AUJ7 | DR | ATP biosynthetic process                                                                                                                                                                                         |
| N | A8AUJ7 | DR | ATP hydrolysis coupled proton transport                                                                                                                                                                          |
| N | A8AUJ7 | DR | hydrogen ion transporting ATP synthase activity, rotational mechanism                                                                                                                                            |
| N | A8AUJ7 | DR | proton-transporting ATPase activity, rotational mechanism                                                                                                                                                        |
| N | A8E1C4 | CC | Deneddylase that deregulates the host cell cycle S phase to create a favorable environment allowing efficient viral genome replication                                                                           |
| N | A8E1C4 | CC | Additionally, acts as a deubiquitinase and cleaves both 'Lys-48' and 'Lys-63'-linked ubiquitin chains (By similarity).                                                                                           |
| N | A8E1C4 | CC | INHIBITION OF CULLINS LEADS TO THE STABILIZATION OF CULLIN-KLING LIGASE SUBSTRATES SUCH AS HOST CDKN1A/p21, CDKN1B/p27kip AND CDC25A, PREVENTING S PHASE PROGRESSION                                             |
| N | A8E1C4 | CC | Interacts with and deneddylates host cullins including CUL1 and CUL4A, thereby reducing their E3 ubiquitin ligase activity                                                                                       |
| N | A8E1C4 | DE | Deneddylase M48;                                                                                                                                                                                                 |
| N | A8E1C4 | DR | cysteine-type peptidase activity                                                                                                                                                                                 |
| N | A8E1C4 | DR | interspecies interaction between organisms                                                                                                                                                                       |
| N | A8EQZ2 | CC | Catalyzes the conversion of glucosamine-6-phosphate to glucosamine-1-phosphate (By similarity).                                                                                                                  |
| N | A8EQZ2 | DE | Phosphoglucosamine mutase;                                                                                                                                                                                       |
| N | A8EQZ2 | DR | carbohydrate metabolic process                                                                                                                                                                                   |
| N | A8EQZ2 | DR | magnesium ion binding                                                                                                                                                                                            |
| N | A8EQZ2 | DR | phosphoglucosamine mutase activity                                                                                                                                                                               |
| N | A8ERI7 | CC | Provides the (R)-glutamate required for cell wall biosynthesis (By similarity).                                                                                                                                  |
| N | A8ERI7 | DE | Glutamate racemase;                                                                                                                                                                                              |
| N | A8ERI7 | DR | cellular cell wall organization                                                                                                                                                                                  |
| N | A8ERI7 | DR | glutamate racemase activity                                                                                                                                                                                      |
| N | A8ERI7 | DR | peptidoglycan biosynthetic process                                                                                                                                                                               |
| N | A8ERI7 | DR | regulation of cell shape                                                                                                                                                                                         |
| N | A8ERT8 | CC | Catalyzes the NADPH-dependent reduction of glutamyl- tRNA(Glu) to glutamate 1-semialdehyde (GSA) (By similarity).                                                                                                |
| N | A8ERT8 | DE | Glutamyl-tRNA reductase;                                                                                                                                                                                         |
| N | A8ERT8 | DR | glutamyl-tRNA reductase activity                                                                                                                                                                                 |
| N | A8ERT8 | DR | oxidation-reduction process                                                                                                                                                                                      |
| N | A8ERT8 | DR | porphyrin biosynthetic process                                                                                                                                                                                   |
| N | A8ERT8 | DR | shikimate 5-dehydrogenase activity                                                                                                                                                                               |
| N | A8EV73 | CC | F(1)F(0) ATP synthase produces ATP from ADP in the presence of a proton or sodium gradient                                                                                                                       |
| N | A8EV73 | CC | DURING CATALYSIS, ATP SYNTHESIS IN THE CATALYTIC DOMAIN OF F(1) IS COUPLED VIA A ROTARY MECHANISM OF THE CENTRAL STALK SUBUNITS TO PROTON TRANSLLOCATION (By similarity)                                         |
| N | A8EV73 | CC | F-type ATPases consist of two structural domains, F(1) containing the extramembraneous catalytic core and F(0) containing the membrane proton channel, linked together by a central stalk and a peripheral stalk |
| N | A8EV73 | DE | ATP synthase F(1) sector subunit delta;                                                                                                                                                                          |
| N | A8EV73 | DE | ATP synthase subunit delta;                                                                                                                                                                                      |
| N | A8EV73 | DE | F-ATPase subunit delta;                                                                                                                                                                                          |
| N | A8EV73 | DE | F-type ATPase subunit delta;                                                                                                                                                                                     |
| N | A8EV73 | DR | ATP synthesis coupled proton transport                                                                                                                                                                           |
| N | A8EV73 | DR | hydrogen ion transporting ATP synthase activity, rotational mechanism                                                                                                                                            |
| N | A8EXC3 | CC | NAD-binding protein involved in the addition of a carboxymethylaminomethyl (cmnm) group at the wobble position (U34) of certain tRNAs, forming tRNA-cmnm(5)s(2)U34 (By similarity).                              |
| N | A8EXC3 | DE | Glucose-inhibited division protein A;                                                                                                                                                                            |

|   |        |    |                                                                                                                                                                                                                                             |
|---|--------|----|---------------------------------------------------------------------------------------------------------------------------------------------------------------------------------------------------------------------------------------------|
| N | A8EXC3 | DE | tRNA uridine 5-carboxymethylaminomethyl modification enzyme MnmG;                                                                                                                                                                           |
| N | A8EXC3 | DR | flavin adenine dinucleotide binding                                                                                                                                                                                                         |
| N | A8EXC3 | DR | tRNA wobble uridine modification                                                                                                                                                                                                            |
| N | A8EXD7 | CC | One of the proteins required for the normal export of preproteins out of the cell cytoplasm                                                                                                                                                 |
| N | A8EXD7 | CC | It also specifically binds to its receptor secA (By similarity).                                                                                                                                                                            |
| N | A8EXD7 | CC | It is a molecular chaperone that binds to a subset of precursor proteins, maintaining them in a translocation-competent state                                                                                                               |
| N | A8EXD7 | DE | Protein-export protein secB;                                                                                                                                                                                                                |
| N | A8EXD7 | DR | protein tetramerization                                                                                                                                                                                                                     |
| N | A8EXD7 | DR | protein transport                                                                                                                                                                                                                           |
| N | A8EXD7 | DR | transmembrane transport                                                                                                                                                                                                                     |
| N | A8EXD7 | DR | unfolded protein binding                                                                                                                                                                                                                    |
| N | A8EZN6 | CC | bidirectionally degrades single-stranded DNA into large acid-insoluble oligonucleotides, which are then degraded further into small acid-soluble oligonucleotides (By similarity)                                                           |
| N | A8EZN6 | DE | Exodeoxyribonuclease 7 large subunit;                                                                                                                                                                                                       |
| N | A8EZN6 | DE | Exodeoxyribonuclease VII large subunit;                                                                                                                                                                                                     |
| N | A8EZN6 | DE | Exonuclease VII large subunit;                                                                                                                                                                                                              |
| N | A8EZN6 | DR | DNA catabolic process                                                                                                                                                                                                                       |
| N | A8EZN6 | DR | exodeoxyribonuclease VII activity                                                                                                                                                                                                           |
| N | A8EZN6 | DR | nucleic acid binding                                                                                                                                                                                                                        |
| N | A8F0A3 | DE | 50S ribosomal protein L33;                                                                                                                                                                                                                  |
| N | A8F0A3 | DR | structural constituent of ribosome                                                                                                                                                                                                          |
| N | A8F2H0 | CC | involved in base excision repair of DNA damaged by oxidation or by mutagenic agents                                                                                                                                                         |
| N | A8F2H0 | CC | Acts as DNA glycosylase that recognizes and removes damaged bases                                                                                                                                                                           |
| N | A8F2H0 | CC | Cleaves the DNA backbone by beta-delta elimination to generate a single-strand break at the site of the removed base with both 3'- and 5'-phosphates (By similarity)                                                                        |
| N | A8F2H0 | CC | Has AP (apurinic/apyrimidinic) lyase activity and introduces nicks in the DNA                                                                                                                                                               |
| N | A8F2H0 | CC | Has a preference for oxidized purines, such as 7,8-dihydro-8-oxoguanine (8-oxo-dGTP)                                                                                                                                                        |
| N | A8F2H0 | DE | AP lyase mutM;                                                                                                                                                                                                                              |
| N | A8F2H0 | DE | DNA-(apurinic or apyrimidinic site) lyase mutM;                                                                                                                                                                                             |
| N | A8F2H0 | DE | Fapy-DNA glycosylase;                                                                                                                                                                                                                       |
| N | A8F2H0 | DE | Formamidopyrimidine-DNA glycosylase;                                                                                                                                                                                                        |
| N | A8F2H0 | DR | base-excision repair                                                                                                                                                                                                                        |
| N | A8F2H0 | DR | damaged DNA binding                                                                                                                                                                                                                         |
| N | A8F2H0 | DR | nucleotide-excision repair                                                                                                                                                                                                                  |
| N | A8F2H0 | DR | oxidized purine base lesion DNA N-glycosylase activity                                                                                                                                                                                      |
| N | A8F2H0 | DR | zinc ion binding                                                                                                                                                                                                                            |
| N | A8FH15 | DE | DAP epimerase;                                                                                                                                                                                                                              |
| N | A8FH15 | DE | Diaminopimelate epimerase;                                                                                                                                                                                                                  |
| N | A8FH15 | DR | diaminopimelate epimerase activity                                                                                                                                                                                                          |
| N | A8FH15 | DR | lysine biosynthetic process via diaminopimelate                                                                                                                                                                                             |
| N | A8FJT1 | CC | Specifically methylates the pseudouridine at position 1915 (m3Psi1915) in 23S rRNA (By similarity).                                                                                                                                         |
| N | A8FJT1 | DE | 23S rRNA m3Psi1915 methyltransferase;                                                                                                                                                                                                       |
| N | A8FJT1 | DE | Ribosomal RNA large subunit methyltransferase H;                                                                                                                                                                                            |
| N | A8FJT1 | DE | rRNA (pseudouridine-N3-)-methyltransferase rlmH;                                                                                                                                                                                            |
| N | A8FJT1 | DR | methyltransferase activity                                                                                                                                                                                                                  |
| N | A8FJT1 | DR | rRNA processing                                                                                                                                                                                                                             |
| N | A8FK34 | CC | Binds directly to 23S ribosomal RNA and is necessary for the in vitro assembly process of the 50S ribosomal subunit                                                                                                                         |
| N | A8FK34 | CC | It is not involved in the protein synthesizing functions of that subunit (By similarity)                                                                                                                                                    |
| N | A8FK34 | DE | 50S ribosomal protein L20;                                                                                                                                                                                                                  |
| N | A8FK34 | DR | structural constituent of ribosome                                                                                                                                                                                                          |
| N | A8FKD8 | CC | The alpha subunit is responsible for the aldol cleavage of indoleglycerol phosphate to indole and glyceraldehyde 3- phosphate.                                                                                                              |
| N | A8FKD8 | DE | Tryptophan synthase alpha chain;                                                                                                                                                                                                            |
| N | A8FKD8 | DR | tryptophan synthase activity                                                                                                                                                                                                                |
| N | A8FKR7 | CC | Catalyzes the GTP-dependent ribosomal translocation step during translation elongation                                                                                                                                                      |
| N | A8FKR7 | CC | Catalyzes the coordinated movement of the two tRNA molecules, the mRNA and conformational changes in the ribosome (By similarity).                                                                                                          |
| N | A8FKR7 | CC | During this step, the ribosome changes from the pre-translocational (PRE) to the post- translocational (POST) state as the newly formed A-site-bound peptidyl-tRNA and P-site-bound deacylated tRNA move to the P and E sites, respectively |
| N | A8FKR7 | DE | Elongation factor G;                                                                                                                                                                                                                        |



|   |        |    |                                                                                                                                                                                                |
|---|--------|----|------------------------------------------------------------------------------------------------------------------------------------------------------------------------------------------------|
| N | A8FKR7 | DR | GTPase activity                                                                                                                                                                                |
| N | A8FKR7 | DR | translation elongation factor activity                                                                                                                                                         |
| N | A8FQY0 | CC | Binds to Cpn60 in the presence of Mg-ATP and suppresses the ATPase activity of the latter (By similarity).                                                                                     |
| N | A8FQY0 | DE | 10 kDa chaperonin;                                                                                                                                                                             |
| N | A8FQY0 | DE | GroES protein;                                                                                                                                                                                 |
| N | A8FQY0 | DE | Protein Cpn10;                                                                                                                                                                                 |
| N | A8FQY0 | DR | protein folding                                                                                                                                                                                |
| N | A8FSH2 | DE | Glucose-6-phosphate isomerase;                                                                                                                                                                 |
| N | A8FSH2 | DE | Phosphoglucose isomerase;                                                                                                                                                                      |
| N | A8FSH2 | DE | Phosphohexose isomerase;                                                                                                                                                                       |
| N | A8FSH2 | DR | gluconeogenesis                                                                                                                                                                                |
| N | A8FSH2 | DR | glucose-6-phosphate isomerase activity                                                                                                                                                         |
| N | A8FTI0 | CC | ATP-dependent specificity component of the Clp protease                                                                                                                                        |
| N | A8FTI0 | CC | Can perform chaperone functions in the absence of ClpP (By similarity).                                                                                                                        |
| N | A8FTI0 | CC | It directs the protease to specific substrates                                                                                                                                                 |
| N | A8FTI0 | DE | ATP-dependent Clp protease ATP-binding subunit ClpX;                                                                                                                                           |
| N | A8FTI0 | DR | ATPase activity                                                                                                                                                                                |
| N | A8FTI0 | DR | protein dimerization activity                                                                                                                                                                  |
| N | A8FTI0 | DR | protein folding                                                                                                                                                                                |
| N | A8FTI0 | DR | unfolded protein binding                                                                                                                                                                       |
| N | A8FTI0 | DR | zinc ion binding                                                                                                                                                                               |
| N | A8FUW6 | DE | Aspartate--tRNA ligase;                                                                                                                                                                        |
| N | A8FUW6 | DE | Aspartyl-tRNA synthetase;                                                                                                                                                                      |
| N | A8FUW6 | DR | aspartate-tRNA ligase activity                                                                                                                                                                 |
| N | A8FUW6 | DR | aspartyl-tRNA aminoacylation                                                                                                                                                                   |
| N | A8FUW6 | DR | nucleic acid binding                                                                                                                                                                           |
| N | A8FW54 | CC | Necessary for the introduction of cis unsaturation into fatty acids                                                                                                                            |
| N | A8FW54 | CC | Catalyzed the dehydration of (3R)-3-hydroxydecanoyl- ACP to E-(2)-decanoyl- ACP and then its isomerization to Z-(3)- decanoyl-ACP (By similarity).                                             |
| N | A8FW54 | DE | 3-hydroxydecanoyl-[acyl-carrier-protein] dehydratase;                                                                                                                                          |
| N | A8FW54 | DE | Beta-hydroxydecanoyl thioester dehydrase;                                                                                                                                                      |
| N | A8FW54 | DR | 3-hydroxydecanoyl-[acyl-carrier-protein] dehydratase activity                                                                                                                                  |
| N | A8FW54 | DR | fatty acid biosynthetic process                                                                                                                                                                |
| N | A8G2S2 | DE | Sugar fermentation stimulation protein homolog;                                                                                                                                                |
| N | A8G4K7 | DE | Urea amidohydrolase subunit gamma;                                                                                                                                                             |
| N | A8G4K7 | DE | Urease subunit gamma;                                                                                                                                                                          |
| N | A8G4K7 | DR | nickel ion binding                                                                                                                                                                             |
| N | A8G4K7 | DR | urea metabolic process                                                                                                                                                                         |
| N | A8G4K7 | DR | urease activity                                                                                                                                                                                |
| N | A8G9L4 | CC | Catalyzes the attachment of isoleucine to tRNA(Ile)                                                                                                                                            |
| N | A8G9L4 | CC | As IleRS can inadvertently accommodate and process structurally similar amino acids such as valine, to avoid such errors it has two additional distinct tRNA(Ile)-dependent editing activities |
| N | A8G9L4 | CC | One activity is designated as 'pretransfer' editing and involves the hydrolysis of activated Val-AMP                                                                                           |
| N | A8G9L4 | CC | The other activity is designated 'posttransfer' editing and involves deacylation of mischarged Val-tRNA(Ile) (By similarity).                                                                  |
| N | A8G9L4 | DE | Isoleucine--tRNA ligase;                                                                                                                                                                       |
| N | A8G9L4 | DE | Isoleucyl-tRNA synthetase;                                                                                                                                                                     |
| N | A8G9L4 | DR | isoleucine-tRNA ligase activity                                                                                                                                                                |
| N | A8G9L4 | DR | isoleucyl-tRNA aminoacylation                                                                                                                                                                  |
| N | A8G9L4 | DR | metal ion binding                                                                                                                                                                              |
| N | A8GAC2 | CC | NQR complex catalyzes the reduction of ubiquinone-1 to ubiquinol by two successive reactions, coupled with the transport of Na(+) ions from the cytoplasm to the periplasm                     |
| N | A8GAC2 | CC | NqrA to nqrE are probably involved in the second step, the conversion of ubisemiquinone to ubiquinol (By similarity).                                                                          |
| N | A8GAC2 | DE | NQR complex subunit D;                                                                                                                                                                         |
| N | A8GAC2 | DE | NQR-1 subunit D;                                                                                                                                                                               |
| N | A8GAC2 | DE | Na(+)-NQR subunit D;                                                                                                                                                                           |
| N | A8GAC2 | DE | Na(+)-translocating NADH-quinone reductase subunit D;                                                                                                                                          |
| N | A8GAC2 | DE | Na(+)-translocating NQR subunit D;                                                                                                                                                             |
| N | A8GAC2 | DR | oxidation-reduction process                                                                                                                                                                    |
| N | A8GAC2 | DR | oxidoreductase activity, acting on NADH or NADPH, quinone or similar compound as acceptor                                                                                                      |

|   |        |    |                                                                                                                                                                                                                                                      |
|---|--------|----|------------------------------------------------------------------------------------------------------------------------------------------------------------------------------------------------------------------------------------------------------|
| N | A8GAC2 | DR | sodium ion transport                                                                                                                                                                                                                                 |
| N | A8GDZ4 | CC | Proton-dependent permease that transports di- and tripeptides (By similarity).                                                                                                                                                                       |
| N | A8GDZ4 | DE | Dipeptide and tripeptide permease A;                                                                                                                                                                                                                 |
| N | A8GDZ4 | DR | oligopeptide transport                                                                                                                                                                                                                               |
| N | A8GDZ4 | DR | peptide transporter activity                                                                                                                                                                                                                         |
| N | A8GDZ4 | DR | protein transport                                                                                                                                                                                                                                    |
| N | A8GHY0 | CC | Co-chaperone involved in the maturation of iron-sulfur cluster-containing proteins                                                                                                                                                                   |
| N | A8GHY0 | CC | Seems to help targeting proteins to be folded toward hscA (By similarity).                                                                                                                                                                           |
| N | A8GHY0 | DE | Co-chaperone protein hscB;                                                                                                                                                                                                                           |
| N | A8GHY0 | DR | chaperone binding                                                                                                                                                                                                                                    |
| N | A8GHY0 | DR | heat shock protein binding                                                                                                                                                                                                                           |
| N | A8GHY0 | DR | protein folding                                                                                                                                                                                                                                      |
| N | A8GKG9 | CC | Channel that opens in response to stretch forces in the membrane lipid bilayer                                                                                                                                                                       |
| N | A8GKG9 | CC | May participate in the regulation of osmotic pressure changes within the cell (By similarity).                                                                                                                                                       |
| N | A8GKG9 | DE | Large-conductance mechanosensitive channel;                                                                                                                                                                                                          |
| N | A8GKG9 | DR | ion channel activity                                                                                                                                                                                                                                 |
| N | A8GPE9 | CC | One of the primary rRNA binding proteins, this protein initially binds near the 5'-end of the 23S rRNA                                                                                                                                               |
| N | A8GPE9 | CC | It is important during the early stages of 50S assembly                                                                                                                                                                                              |
| N | A8GPE9 | CC | It makes multiple contacts with different domains of the 23S rRNA in the assembled 50S subunit and ribosome (By similarity).                                                                                                                         |
| N | A8GPE9 | DE | 50S ribosomal protein L4;                                                                                                                                                                                                                            |
| N | A8GPE9 | DR | structural constituent of ribosome                                                                                                                                                                                                                   |
| N | A8GRJ1 | CC | Involved in the tonB-independent uptake of proteins (By similarity).                                                                                                                                                                                 |
| N | A8GRJ1 | DE | Protein tolB;                                                                                                                                                                                                                                        |
| N | A8GRJ1 | DR | protein import                                                                                                                                                                                                                                       |
| N | A8GT51 | DE | 50S ribosomal protein L30;                                                                                                                                                                                                                           |
| N | A8GT51 | DR | structural constituent of ribosome                                                                                                                                                                                                                   |
| N | A8H2P7 | DE | UPF0133 protein Spea_1509;                                                                                                                                                                                                                           |
| N | A8H966 | CC | Methyltransferase required for the conversion of dimethylmenaquinone (DMKH2) to menaquinone (MKH2) and the conversion of 2-polyprenyl-6-methoxy-1,4-benzoquinol (DDMQH2) to 2-polyprenyl-3-methyl-6-methoxy-1,4-benzoquinol (DMQH2) (By similarity). |
| N | A8H966 | DE | Ubiquinone/menaquinone biosynthesis methyltransferase ubiE;                                                                                                                                                                                          |
| N | A8H966 | DR | menaquinone biosynthetic process                                                                                                                                                                                                                     |
| N | A8H966 | DR | methyltransferase activity                                                                                                                                                                                                                           |
| N | A8H966 | DR | ubiquinone biosynthetic process                                                                                                                                                                                                                      |
| N | A8HS18 | CC | F(1)F(0) ATP synthase produces ATP from ADP in the presence of a proton or sodium gradient                                                                                                                                                           |
| N | A8HS18 | CC | During catalysis, ATP synthesis in the catalytic domain of F(1) is coupled via a rotary mechanism of the central stalk subunits to proton translocation (By similarity)                                                                              |
| N | A8HS18 | CC | F-type ATPases consist of two structural domains, F(1) containing the extramembraneous catalytic core and F(0) containing the membrane proton channel, linked together by a central stalk and a peripheral stalk                                     |
| N | A8HS18 | DE | ATP synthase F(1) sector subunit delta;                                                                                                                                                                                                              |
| N | A8HS18 | DE | ATP synthase subunit delta;                                                                                                                                                                                                                          |
| N | A8HS18 | DE | F-ATPase subunit delta;                                                                                                                                                                                                                              |
| N | A8HS18 | DE | F-type ATPase subunit delta;                                                                                                                                                                                                                         |
| N | A8HS18 | DR | ATP synthesis coupled proton transport                                                                                                                                                                                                               |
| N | A8HS18 | DR | hydrogen ion transporting ATP synthase activity, rotational mechanism                                                                                                                                                                                |
| N | A8I489 | CC | Involved in saturated fatty acids biosynthesis (By similarity).                                                                                                                                                                                      |
| N | A8I489 | DE | (3R)-hydroxymyristoyl ACP dehydratase;                                                                                                                                                                                                               |
| N | A8I489 | DE | (3R)-hydroxymyristoyl-[acyl-carrier-protein] dehydratase;                                                                                                                                                                                            |
| N | A8I489 | DR | fatty acid biosynthetic process                                                                                                                                                                                                                      |
| N | A8I489 | DR | hydro-lyase activity                                                                                                                                                                                                                                 |
| N | A8I489 | DR | lipid A biosynthetic process                                                                                                                                                                                                                         |
| N | A8I4T0 | CC | Required for maturation of urease via the functional incorporation of the urease nickel metallocenter (By similarity).                                                                                                                               |
| N | A8I4T0 | DE | Urease accessory protein ureF;                                                                                                                                                                                                                       |
| N | A8I4T0 | DR | nickel ion binding                                                                                                                                                                                                                                   |
| N | A8I4T0 | DR | nitrogen compound metabolic process                                                                                                                                                                                                                  |
| N | A8IGA3 | CC | Involved in mRNA degradation                                                                                                                                                                                                                         |
| N | A8IGA3 | CC | Hydrolyzes single-stranded polyribonucleotides processively in the 3'- to 5'-direction (By similarity).                                                                                                                                              |

|   |        |    |                                                                                                                                                                                                                                         |
|---|--------|----|-----------------------------------------------------------------------------------------------------------------------------------------------------------------------------------------------------------------------------------------|
| N | A8IGA3 | DE | Polynucleotide phosphorylase;                                                                                                                                                                                                           |
| N | A8IGA3 | DE | Polyribonucleotide nucleotidyltransferase;                                                                                                                                                                                              |
| N | A8IGA3 | DR | 3'-5'-exoribonuclease activity                                                                                                                                                                                                          |
| N | A8IGA3 | DR | RNA processing                                                                                                                                                                                                                          |
| N | A8IGA3 | DR | mRNA catabolic process                                                                                                                                                                                                                  |
| N | A8IGA3 | DR | polyribonucleotide nucleotidyltransferase activity                                                                                                                                                                                      |
| N | A8KZA9 | CC | Specifically methylates the N4 position of cytidine in position 1402 (C1402) of 16S rRNA (By similarity).                                                                                                                               |
| N | A8KZA9 | DE | 16S rRNA m(4)C1402 methyltransferase;                                                                                                                                                                                                   |
| N | A8KZA9 | DE | Ribosomal RNA small subunit methyltransferase H;                                                                                                                                                                                        |
| N | A8KZA9 | DE | rRNA (cytosine-N(4)-)-methyltransferase RsmH;                                                                                                                                                                                           |
| N | A8KZA9 | DR | methyltransferase activity                                                                                                                                                                                                              |
| N | A8KZA9 | DR | rRNA processing                                                                                                                                                                                                                         |
| N | A8LDK0 | CC | May play a role in the intracellular transport of hydrophobic ligands (Potential).                                                                                                                                                      |
| N | A8LDK0 | DE | UPF0678 fatty acid-binding protein-like protein Franean1_6164;                                                                                                                                                                          |
| N | A8LKE7 | CC | Involved in mRNA degradation                                                                                                                                                                                                            |
| N | A8LKE7 | CC | Hydrolyzes single-stranded polyribonucleotides processively in the 3'- to 5'- direction (By similarity).                                                                                                                                |
| N | A8LKE7 | DE | Polynucleotide phosphorylase;                                                                                                                                                                                                           |
| N | A8LKE7 | DE | Polyribonucleotide nucleotidyltransferase;                                                                                                                                                                                              |
| N | A8LKE7 | DR | 3'-5'-exoribonuclease activity                                                                                                                                                                                                          |
| N | A8LKE7 | DR | RNA processing                                                                                                                                                                                                                          |
| N | A8LKE7 | DR | mRNA catabolic process                                                                                                                                                                                                                  |
| N | A8LKE7 | DR | polyribonucleotide nucleotidyltransferase activity                                                                                                                                                                                      |
| N | A8LLE0 | CC | All essential GTFase that binds both GDR and GTR, with rapid nucleotide exchange                                                                                                                                                        |
| N | A8LLE0 | CC | Plays a role in 16S rRNA processing and 30S ribosomal subunit biogenesis and possibly also in cell cycle regulation and energy metabolism (By similarity).                                                                              |
| N | A8LLE0 | DR | ribosome biogenesis                                                                                                                                                                                                                     |
| N | A8LRS7 | CC | Catalyzes the transfer of a ribosyl phosphate group from 5-phosphoribose 1-diphosphate to orotate, leading to the formation of orotidine monophosphate (OMP) (By similarity).                                                           |
| N | A8LRS7 | DE | Orotate phosphoribosyltransferase;                                                                                                                                                                                                      |
| N | A8LRS7 | DR | nucleoside metabolic process                                                                                                                                                                                                            |
| N | A8LRS7 | DR | orotate phosphoribosyltransferase activity                                                                                                                                                                                              |
| N | A8LRS7 | DR | pyrimidine nucleotide biosynthetic process                                                                                                                                                                                              |
| N | A8LXK0 | CC | Specifically methylates the N7 position of guanosine in position 518 of 16S rRNA (By similarity).                                                                                                                                       |
| N | A8LXK0 | DE | 16S rRNA 7-methylguanosine methyltransferase;                                                                                                                                                                                           |
| N | A8LXK0 | DE | 16S rRNA m7G methyltransferase;                                                                                                                                                                                                         |
| N | A8LXK0 | DE | Ribosomal RNA small subunit methyltransferase G;                                                                                                                                                                                        |
| N | A8LXK0 | DR | rRNA methyltransferase activity                                                                                                                                                                                                         |
| N | A8LY44 | DE | 50S ribosomal protein L35;                                                                                                                                                                                                              |
| N | A8LY44 | DR | structural constituent of ribosome                                                                                                                                                                                                      |
| N | A8M609 | CC | NDH-1 shuttles electrons from NADH, via FMN and iron- sulfur (Fe-S) centers, to quinones in the respiratory chain                                                                                                                       |
| N | A8M609 | CC | Couples the redox reaction to proton translocation (for every two electrons transferred, four hydrogen ions are translocated across the cytoplasmic membrane), and thus conserves the redox energy in a proton gradient (By similarity) |
| N | A8M609 | CC | The immediate electron acceptor for the enzyme in this species is believed to be a menaquinone                                                                                                                                          |
| N | A8M609 | DE | NADH dehydrogenase I subunit N;                                                                                                                                                                                                         |
| N | A8M609 | DE | NADH-quinone oxidoreductase subunit N;                                                                                                                                                                                                  |
| N | A8M609 | DE | NDH-1 subunit N;                                                                                                                                                                                                                        |
| N | A8M609 | DR | ATP synthesis coupled electron transport                                                                                                                                                                                                |
| N | A8M609 | DR | NADH dehydrogenase (ubiquinone) activity                                                                                                                                                                                                |
| N | A8M609 | DR | quinone binding                                                                                                                                                                                                                         |
| N | A8MEH2 | DE | Histidinol-phosphate aminotransferase;                                                                                                                                                                                                  |
| N | A8MEH2 | DE | Imidazole acetol-phosphate transaminase;                                                                                                                                                                                                |
| N | A8MEH2 | DR | 1-aminocyclopropane-1-carboxylate synthase activity                                                                                                                                                                                     |
| N | A8MEH2 | DR | histidine biosynthetic process                                                                                                                                                                                                          |
| N | A8MEH2 | DR | histidinol-phosphate transaminase activity                                                                                                                                                                                              |
| N | A8MEH2 | DR | pyridoxal phosphate binding                                                                                                                                                                                                             |
| N | A8MI62 | DE | UPF0735 ACT domain-containing protein Clos_1956;                                                                                                                                                                                        |
| N | A8MI62 | DR | L-phenylalanine biosynthetic process                                                                                                                                                                                                    |
| N | A8MLE2 | CC | One of the early assembly proteins it binds 23S rRNA                                                                                                                                                                                    |
| N | A8MLE2 | CC | forms the main docking site for trigger factor binding to the ribosome (By similarity)                                                                                                                                                  |

|   |        |    |                                                                                                                                                                                                   |
|---|--------|----|---------------------------------------------------------------------------------------------------------------------------------------------------------------------------------------------------|
| N | A8MLE2 | CC | One of the proteins that surrounds the polypeptide exit tunnel on the outside of the ribosome                                                                                                     |
| N | A8MLE2 | DE | 50S ribosomal protein L23;                                                                                                                                                                        |
| N | A8MLE2 | DR | nucleotide binding                                                                                                                                                                                |
| N | A8MLE2 | DR | structural constituent of ribosome                                                                                                                                                                |
| N | A8MT70 | DE | Zinc finger B-box domain-containing protein 1;                                                                                                                                                    |
| N | A8MT70 | DR | zinc ion binding                                                                                                                                                                                  |
| N | A8MVG2 | DE | Putative selection and upkeep of intraepithelial T-cells protein 1 homolog;                                                                                                                       |
| N | A8MWL7 | DE | Transmembrane protein 14D;                                                                                                                                                                        |
| N | A8MYR8 | CC | May play a role as an effector of the ADP-ribosylation factor-like protein 2, ARL2 (By similarity).                                                                                               |
| N | A8MYR8 | DE | ADP-ribosylation factor-like protein 2-binding protein-like protein;                                                                                                                              |
| N | A8MYR8 | DE | ARF-like 2-binding protein-like protein;                                                                                                                                                          |
| N | A8MYR8 | DE | ARL2BP-like protein;                                                                                                                                                                              |
| N | A8NZY7 | CC | Catalyzes the synthesis of dihydrouridine, a modified base found in the D-loop of most tRNAs                                                                                                      |
| N | A8NZY7 | CC | Specifically modifies U47 in cytoplasmic tRNAs (By similarity).                                                                                                                                   |
| N | A8NZY7 | DE | tRNA-dihydrouridine synthase 3;                                                                                                                                                                   |
| N | A8NZY7 | DR | flavin adenine dinucleotide binding                                                                                                                                                               |
| N | A8NZY7 | DR | nucleic acid binding                                                                                                                                                                              |
| N | A8NZY7 | DR | oxidation-reduction process                                                                                                                                                                       |
| N | A8NZY7 | DR | tRNA dihydrouridine synthase activity                                                                                                                                                             |
| N | A8NZY7 | DR | tRNA processing                                                                                                                                                                                   |
| N | A8NZY7 | DR | zinc ion binding                                                                                                                                                                                  |
| N | A8WJR8 | CC | Required for oocyte-to-zygote transition in which it phosphorylates oocyte proteins, including mei-1, oma-1, oma-2, mex-5, and mex-6, modifying their activity and/or stability following meiosis |
| N | A8WJR8 | CC | functions in both spindle positioning and in the posterior localization of cytoplasmic determinants, including pie-1, pos-1, and pgl-1, in early embryos (By similarity)                          |
| N | A8WJR8 | DE | Dual specificity Yak1-related kinase mbk-2;                                                                                                                                                       |
| N | A8WJR8 | DE | Dual specificity tyrosine-phosphorylation-regulated kinase mbk-2;                                                                                                                                 |
| N | A8WJR8 | DE | Minibrain Kinase 2;                                                                                                                                                                               |
| N | A8WJR8 | DR | multicellular organismal development                                                                                                                                                              |
| N | A8WJR8 | DR | protein phosphorylation                                                                                                                                                                           |
| N | A8WJR8 | DR | protein serine/threonine kinase activity                                                                                                                                                          |
| N | A8WJR8 | DR | protein tyrosine kinase activity                                                                                                                                                                  |
| N | A8WJR8 | DR | response to stimulus                                                                                                                                                                              |
| N | A8WJR8 | DR | sensory perception of smell                                                                                                                                                                       |
| N | A8WLV5 | CC | Binds to the 40S ribosome and promotes the binding of methionyl-tRNA and mRNA                                                                                                                     |
| N | A8WLV5 | CC | This subunit binds to the 18S rRNA (By similarity).                                                                                                                                               |
| N | A8WLV5 | DE | Probable eukaryotic translation initiation factor 3 subunit G;                                                                                                                                    |
| N | A8WLV5 | DR | nucleotide binding                                                                                                                                                                                |
| N | A8WLV5 | DR | translation initiation factor activity                                                                                                                                                            |
| N | A8WLV5 | DR | zinc ion binding                                                                                                                                                                                  |
| N | A8XFG2 | CC | Core subunit of the mitochondrial membrane respiratory chain NADH dehydrogenase (Complex I) that is believed to belong to the minimal assembly                                                    |
| N | A8XFG2 | CC | complex for catalysis in the transfer of electrons from NADH to the respiratory chain                                                                                                             |
| N | A8XFG2 | CC | The immediate electron acceptor for the enzyme is believed to be ubiquinone (By similarity).                                                                                                      |
| N | A8XFG2 | DE | mitochondrial NADH dehydrogenase (ubiquinone) iron-sulfur protein 1,                                                                                                                              |
| N | A8XFG2 | DR | 4 iron, 4 sulfur cluster binding                                                                                                                                                                  |
| N | A8XFG2 | DR | NADH dehydrogenase (ubiquinone) activity                                                                                                                                                          |
| N | A8XFG2 | DR | electron transport chain                                                                                                                                                                          |
| N | A8XFG2 | DR | metal ion binding                                                                                                                                                                                 |
| N | A8XFG2 | DR | quinone binding                                                                                                                                                                                   |
| N | A8Y9E3 | CC | NDH shuttles electrons from NAD(P)H:plastoquinone, via FMN and iron-sulfur (Fe-S) centers, to quinones in the photosynthetic chain and possibly in a chloroplast respiratory chain                |
| N | A8Y9E3 | CC | Couples the redox reaction to proton translocation, and thus conserves the redox energy in a proton gradient (By similarity).                                                                     |
| N | A8Y9E3 | CC | The immediate electron acceptor for the enzyme in this species is believed to be plastoquinone                                                                                                    |
| N | A8Y9E3 | DE | NAD(P)H dehydrogenase subunit H;                                                                                                                                                                  |
| N | A8Y9E3 | DE | NAD(P)H-quinone oxidoreductase subunit H, chloroplastic;                                                                                                                                          |
| N | A8Y9E3 | DE | NADH-plastoquinone oxidoreductase 49 kDa subunit;                                                                                                                                                 |

|   |        |    |                                                                                                                                                                                   |
|---|--------|----|-----------------------------------------------------------------------------------------------------------------------------------------------------------------------------------|
| N | A8Y9E3 | DE | NADH-plastoquinone oxidoreductase subunit H;                                                                                                                                      |
| N | A8Y9E3 | DR | oxidation-reduction process                                                                                                                                                       |
| N | A8Y9E3 | DR | oxidoreductase activity, acting on NADH or NADPH                                                                                                                                  |
| N | A8Y9E3 | DR | quinone binding                                                                                                                                                                   |
| N | A8YTF9 | CC | Phosphorylation of dTMP to form dTDP in both de novo and salvage pathways of dTTP synthesis (By similarity).                                                                      |
| N | A8YTF9 | DE | Thymidylate kinase;                                                                                                                                                               |
| N | A8YTF9 | DE | dTMP kinase;                                                                                                                                                                      |
| N | A8YTF9 | DR | dTDP biosynthetic process                                                                                                                                                         |
| N | A8YTF9 | DR | thymidylate kinase activity                                                                                                                                                       |
| N | A8YY76 | CC | Key component of the proton channel; it plays a direct role in the translocation of protons across the membrane (By similarity).                                                  |
| N | A8YY76 | DE | ATP synthase F0 sector subunit a;                                                                                                                                                 |
| N | A8YY76 | DE | ATP synthase subunit a;                                                                                                                                                           |
| N | A8YY76 | DE | F-ATPase subunit 6;                                                                                                                                                               |
| N | A8YY76 | DR | ATP synthesis coupled proton transport                                                                                                                                            |
| N | A8YY76 | DR | hydrogen ion transmembrane transporter activity                                                                                                                                   |
| N | A8Z0X4 | CC | May play a role in DNA repair                                                                                                                                                     |
| N | A8Z0X4 | CC | It may act with recF and recO (By similarity).<br>It seems to be involved in an <i>recBC</i> -independent recombinational process of DNA repair.                                  |
| N | A8Z0X4 | CC |                                                                                                                                                                                   |
| N | A8Z0X4 | DE | Recombination protein recR;                                                                                                                                                       |
| N | A8Z0X4 | DR | DNA recombination                                                                                                                                                                 |
| N | A8Z0X4 | DR | metal ion binding                                                                                                                                                                 |
| N | A8Z3V1 | CC | Responsible for synthesis of pseudouridine from uracil- 55 in the psi GC loop of transfer RNAs (By similarity).                                                                   |
| N | A8Z3V1 | DE | Psi55 synthase;                                                                                                                                                                   |
| N | A8Z3V1 | DE | tRNA pseudouridine 55 synthase;                                                                                                                                                   |
| N | A8Z3V1 | DE | tRNA pseudouridine synthase B;                                                                                                                                                    |
| N | A8Z3V1 | DE | tRNA pseudouridylate synthase;                                                                                                                                                    |
| N | A8Z3V1 | DE | tRNA-uridine isomerase;                                                                                                                                                           |
| N | A8Z3V1 | DR | pseudouridine synthase activity                                                                                                                                                   |
| N | A8Z3V1 | DR | pseudouridine synthesis                                                                                                                                                           |
| N | A8Z3V1 | DR | tRNA processing                                                                                                                                                                   |
| N | A8Z4N4 | DE | Serine protease splF;                                                                                                                                                             |
| N | A8Z4N4 | DR | serine-type endopeptidase activity                                                                                                                                                |
| N | A8Z522 | CC | Metallothiol transferase which confers resistance to fosfomycin by catalyzing the addition of a thiol cofactor to fosfomycin                                                      |
| N | A8Z522 | CC | L-cysteine is probably the physiological thiol donor (By similarity).                                                                                                             |
| N | A8Z522 | DE | Fosfomycin resistance protein;                                                                                                                                                    |
| N | A8Z522 | DE | Metallothiol transferase fosB;                                                                                                                                                    |
| N | A8Z522 | DR | metal ion binding                                                                                                                                                                 |
| N | A8Z522 | DR | response to antibiotic                                                                                                                                                            |
| N | A8Z522 | DR | transferase activity, transferring alkyl or aryl (other than methyl) groups                                                                                                       |
| N | A8ZUS9 | CC | Catalyzes the conversion of dethiobiotin (DTB) to biotin by the insertion of a sulfur atom into dethiobiotin via a radical- based mechanism (By similarity).                      |
| N | A8ZUS9 | DE | Biotin synthase;                                                                                                                                                                  |
| N | A8ZUS9 | DR | 2 iron, 2 sulfur cluster binding                                                                                                                                                  |
| N | A8ZUS9 | DR | 4 iron, 4 sulfur cluster binding                                                                                                                                                  |
| N | A8ZUS9 | DR | biotin biosynthetic process                                                                                                                                                       |
| N | A8ZUS9 | DR | biotin synthase activity                                                                                                                                                          |
| N | A8ZUS9 | DR | metal ion binding                                                                                                                                                                 |
| N | A8ZXZ4 | CC | This is one of the proteins that binds to the 5S RNA in the ribosome where it forms part of the central protuberance (By similarity).                                             |
| N | A8ZXZ4 | DE | 50S ribosomal protein L25;                                                                                                                                                        |
| N | A8ZXZ4 | DE | General stress protein CTC;                                                                                                                                                       |
| N | A8ZXZ4 | DR | 5S rRNA binding                                                                                                                                                                   |
| N | A8ZXZ4 | DR | structural constituent of ribosome                                                                                                                                                |
| N | A9A565 | CC | Catalyzes the attachment of alanine to tRNA(Ala) in a two-step reaction: alanine is first activated by ATP to form Ala- AMP and then transferred to the acceptor end of tRNA(Ala) |
| N | A9A565 | CC | Also edits incorrectly charged Ser-tRNA(Ala) and Gly-tRNA(Ala) via its editing domain (By similarity).                                                                            |
| N | A9A565 | DE | Alanine--tRNA ligase;                                                                                                                                                             |
| N | A9A565 | DE | Alanyl-tRNA synthetase;                                                                                                                                                           |
| N | A9A565 | DR | alanine-tRNA ligase activity                                                                                                                                                      |

|   |        |    |                                                                                                                                                                                                                                         |
|---|--------|----|-----------------------------------------------------------------------------------------------------------------------------------------------------------------------------------------------------------------------------------------|
| N | A9A565 | DR | alanyl-tRNA aminoacylation                                                                                                                                                                                                              |
| N | A9A565 | DR | metal ion binding                                                                                                                                                                                                                       |
| N | A9A6R4 | CC | Catalyzes the reversible phosphorylation of UMP to UDP (By similarity).                                                                                                                                                                 |
| N | A9A6R4 | DE | UMP kinase;                                                                                                                                                                                                                             |
| N | A9A6R4 | DE | Uridine monophosphate kinase;                                                                                                                                                                                                           |
| N | A9A6R4 | DE | Uridylate kinase;                                                                                                                                                                                                                       |
| N | A9A6R4 | DR | UMP kinase activity                                                                                                                                                                                                                     |
| N | A9A6R4 | DR | cellular amino acid biosynthetic process                                                                                                                                                                                                |
| N | A9A6R4 | DR | pyrimidine nucleotide biosynthetic process                                                                                                                                                                                              |
| N | A9A788 | CC | Component of the proteasome core, a large protease complex with broad specificity involved in protein degradation (By similarity).                                                                                                      |
| N | A9A788 | DE | 20S proteasome beta subunit;                                                                                                                                                                                                            |
| N | A9A788 | DE | Proteasome core protein PsmB;                                                                                                                                                                                                           |
| N | A9A788 | DE | Proteasome subunit beta;                                                                                                                                                                                                                |
| N | A9A788 | DR | proteolysis involved in cellular protein catabolic process                                                                                                                                                                              |
| N | A9A788 | DR | threonine-type endopeptidase activity                                                                                                                                                                                                   |
| N | A9ADK3 | CC | Binds to 23S rRNA                                                                                                                                                                                                                       |
| N | A9ADK3 | CC | Forms part of two intersubunit bridges in the 70S ribosome (By similarity).                                                                                                                                                             |
| N | A9ADK3 | DE | 50S ribosomal protein L14;                                                                                                                                                                                                              |
| N | A9ADK3 | DR | structural constituent of ribosome                                                                                                                                                                                                      |
| N | A9AEU0 | DE | Glutamate-1-semialdehyde 2,1-aminomutase;                                                                                                                                                                                               |
| N | A9AEU0 | DE | Glutamate-1-semialdehyde aminotransferase;                                                                                                                                                                                              |
| N | A9AEU0 | DR | glutamate-1-semialdehyde 2,1-aminomutase activity                                                                                                                                                                                       |
| N | A9AEU0 | DR | porphyrin biosynthetic process                                                                                                                                                                                                          |
| N | A9AEU0 | DR | pyridoxal phosphate binding                                                                                                                                                                                                             |
| N | A9AEU0 | DR | transaminase activity                                                                                                                                                                                                                   |
| N | A9AF24 | CC | Riboflavin synthase is a bifunctional enzyme complex catalyzing the formation of riboflavin from 5-amino-6-(1'-D)- ribityl-amino-2,4(1H,3H)-pyrimidinedione and L-3,4-dihydroxy-2- butanone-4-phosphate via 6,7-dimethyl-8-lumazine     |
| N | A9AF24 | CC | The beta subunit catalyzes the condensation of 5-amino-6-(1'-D)-ribityl-amino-2,4(1H,3H)-pyrimidinedione with L-3,4-dihydroxy-2-butanone-4- phosphate yielding 6,7-dimethyl-8-lumazine (By similarity).                                 |
| N | A9AF24 | DE | 6,7-dimethyl-8-ribityllumazine synthase;                                                                                                                                                                                                |
| N | A9AF24 | DE | DMRL synthase;                                                                                                                                                                                                                          |
| N | A9AF24 | DE | Lumazine synthase;                                                                                                                                                                                                                      |
| N | A9AF24 | DE | Riboflavin synthase beta chain;                                                                                                                                                                                                         |
| N | A9AF24 | DR | riboflavin biosynthetic process                                                                                                                                                                                                         |
| N | A9AF24 | DR | riboflavin synthase activity                                                                                                                                                                                                            |
| N | A9AFC7 | DE | Aspartate--tRNA ligase;                                                                                                                                                                                                                 |
| N | A9AFC7 | DE | Aspartyl-tRNA synthetase;                                                                                                                                                                                                               |
| N | A9AFC7 | DR | aspartate-tRNA ligase activity                                                                                                                                                                                                          |
| N | A9AFC7 | DR | aspartyl-tRNA aminoacylation                                                                                                                                                                                                            |
| N | A9AFC7 | DR | nucleic acid binding                                                                                                                                                                                                                    |
| N | A9AGE2 | CC | Synthesis of 3-octaprenyl-4-hydroxybenzoate (By similarity).                                                                                                                                                                            |
| N | A9AGE2 | DE | 4-HB polyprenyltransferase;                                                                                                                                                                                                             |
| N | A9AGE2 | DE | 4-hydroxybenzoate octaprenyltransferase;                                                                                                                                                                                                |
| N | A9AGE2 | DR | prenyltransferase activity                                                                                                                                                                                                              |
| N | A9AGE2 | DR | ubiquinone biosynthetic process                                                                                                                                                                                                         |
| N | A9AYC1 | CC | Catalyzes the reversible formation of acyl-phosphate (acyl-PO(4)) from acyl-[acyl-carrier-protein] (acyl-ACP)                                                                                                                           |
| N | A9AYC1 | CC | This enzyme utilizes acyl-ACP as fatty acyl donor, but not acyl-CoA (By similarity).                                                                                                                                                    |
| N | A9AYC1 | DE | Acyl-ACP phosphotransacylase;                                                                                                                                                                                                           |
| N | A9AYC1 | DE | Acyl-[acyl-carrier-protein]--phosphate acyltransferase;                                                                                                                                                                                 |
| N | A9AYC1 | DE | Phosphate acyltransferase;                                                                                                                                                                                                              |
| N | A9AYC1 | DE | Phosphate-acyl-ACP acyltransferase;                                                                                                                                                                                                     |
| N | A9AYC1 | DR | fatty acid biosynthetic process                                                                                                                                                                                                         |
| N | A9AYC1 | DR | phospholipid biosynthetic process                                                                                                                                                                                                       |
| N | A9AYC1 | DR | transferase activity, transferring acyl groups other than amino-acyl groups                                                                                                                                                             |
| N | A9B4Z5 | CC | NDH-1 shuttles electrons from NADH, via FMN and iron- sulfur (Fe-S) centers, to quinones in the respiratory chain                                                                                                                       |
| N | A9B4Z5 | CC | Couples the redox reaction to proton translocation (for every two electrons transferred, four hydrogen ions are translocated across the cytoplasmic membrane), and thus conserves the redox energy in a proton gradient (By similarity) |
| N | A9B4Z5 | CC | The immediate electron acceptor for the enzyme in this species is believed to be ubiquinone                                                                                                                                             |

|   |        |    |                                                                                                                                                                                                                                         |
|---|--------|----|-----------------------------------------------------------------------------------------------------------------------------------------------------------------------------------------------------------------------------------------|
| N | A9B4Z5 | DE | NADH dehydrogenase I subunit B 1;                                                                                                                                                                                                       |
| N | A9B4Z5 | DE | NADH-quinone oxidoreductase subunit B 1;                                                                                                                                                                                                |
| N | A9B4Z5 | DE | NDH-1 subunit B 1;                                                                                                                                                                                                                      |
| N | A9B4Z5 | DR | 4 iron, 4 sulfur cluster binding                                                                                                                                                                                                        |
| N | A9B4Z5 | DR | NADH dehydrogenase (ubiquinone) activity                                                                                                                                                                                                |
| N | A9B4Z5 | DR | metal ion binding                                                                                                                                                                                                                       |
| N | A9B4Z5 | DR | oxidation-reduction process                                                                                                                                                                                                             |
| N | A9B4Z5 | DR | quinone binding                                                                                                                                                                                                                         |
| N | A9B7I9 | CC | The natural substrate for this enzyme may be peptidyl- tRNAs which drop off the ribosome during protein synthesis (By similarity).                                                                                                      |
| N | A9B7I9 | DE | Peptidyl-tRNA hydrolase;                                                                                                                                                                                                                |
| N | A9B7I9 | DR | aminoacyl-tRNA hydrolase activity                                                                                                                                                                                                       |
| N | A9BNJ3 | CC | Involved in DNA repair and recF pathway recombination (By similarity).                                                                                                                                                                  |
| N | A9BNJ3 | DE | DNA repair protein recO;                                                                                                                                                                                                                |
| N | A9BNJ3 | DE | Recombination protein O;                                                                                                                                                                                                                |
| N | A9BNJ3 | DR | ARF GTPase activator activity                                                                                                                                                                                                           |
| N | A9BNJ3 | DR | DNA recombination                                                                                                                                                                                                                       |
| N | A9BNJ3 | DR | regulation of ARF GTPase activity                                                                                                                                                                                                       |
| N | A9BNJ3 | DR | zinc ion binding                                                                                                                                                                                                                        |
| N | A9BVK1 | CC | Catalyzes the S-adenosylmethionine monomethyl esterification of trans-aconitate (By similarity).                                                                                                                                        |
| N | A9BVK1 | DE | Trans-aconitate 2-methyltransferase;                                                                                                                                                                                                    |
| N | A9BVK1 | DR | trans-aconitate 2-methyltransferase activity                                                                                                                                                                                            |
| N | A9EX55 | CC | NDH-1 shuttles electrons from NADH, via FMN and iron- sulfur (Fe-S) centers, to quinones in the respiratory chain                                                                                                                       |
| N | A9EX55 | CC | Couples the redox reaction to proton translocation (for every two electrons transferred, four hydrogen ions are translocated across the cytoplasmic membrane), and thus conserves the redox energy in a proton gradient (By similarity) |
| N | A9EX55 | CC | The immediate electron acceptor for the enzyme in this species is believed to be ubiquinone                                                                                                                                             |
| N | A9EX55 | DE | NADH dehydrogenase I subunit N 1;                                                                                                                                                                                                       |
| N | A9EX55 | DE | NADH-quinone oxidoreductase subunit N 1;                                                                                                                                                                                                |
| N | A9EX55 | DE | NDH-1 subunit N 1;                                                                                                                                                                                                                      |
| N | A9EX55 | DR | ATP synthesis coupled electron transport                                                                                                                                                                                                |
| N | A9EX55 | DR | NADH dehydrogenase (ubiquinone) activity                                                                                                                                                                                                |
| N | A9EX55 | DR | quinone binding                                                                                                                                                                                                                         |
| N | A9FGG6 | CC | One of the primary tRNA binding proteins, it binds directly to 16S tRNA central domain where it helps coordinate assembly of the platform of the 30S subunit (By similarity)                                                            |
| N | A9FGG6 | DE | 30S ribosomal protein S8;                                                                                                                                                                                                               |
| N | A9FGG6 | DR | structural constituent of ribosome                                                                                                                                                                                                      |
| N | A9GQU6 | DE | Acetylglutamate kinase;                                                                                                                                                                                                                 |
| N | A9GQU6 | DE | N-acetyl-L-glutamate 5-phosphotransferase;                                                                                                                                                                                              |
| N | A9GQU6 | DR | acetylglutamate kinase activity                                                                                                                                                                                                         |
| N | A9GQU6 | DR | arginine biosynthetic process                                                                                                                                                                                                           |
| N | A9GQU6 | DR | glutamate 5-kinase activity                                                                                                                                                                                                             |
| N | A9GQU6 | DR | proline biosynthetic process                                                                                                                                                                                                            |
| N | A9H311 | DE | Histidinol-phosphate aminotransferase;                                                                                                                                                                                                  |
| N | A9H311 | DE | Imidazole acetol-phosphate transaminase;                                                                                                                                                                                                |
| N | A9H311 | DR | histidine biosynthetic process                                                                                                                                                                                                          |
| N | A9H311 | DR | histidinol-phosphate transaminase activity                                                                                                                                                                                              |
| N | A9H311 | DR | pyridoxal phosphate binding                                                                                                                                                                                                             |
| N | A9HKR8 | DE | Acetylglutamate kinase;                                                                                                                                                                                                                 |
| N | A9HKR8 | DE | N-acetyl-L-glutamate 5-phosphotransferase;                                                                                                                                                                                              |
| N | A9HKR8 | DR | acetylglutamate kinase activity                                                                                                                                                                                                         |
| N | A9HKR8 | DR | arginine biosynthetic process                                                                                                                                                                                                           |
| N | A9HKR8 | DR | glutamate 5-kinase activity                                                                                                                                                                                                             |
| N | A9HKR8 | DR | proline biosynthetic process                                                                                                                                                                                                            |
| N | A9HVA1 | CC | Plays an important role in the initiation and regulation of chromosomal replication                                                                                                                                                     |
| N | A9HVA1 | CC | Binds to the origin of replication; it binds specifically double-stranded DNA at a 9 bp consensus (dnaA box): 5'-TTATC[CA]A[CA]A-3'                                                                                                     |
| N | A9HVA1 | CC | DnaA binds to ATP and to acidic phospholipids (By similarity).                                                                                                                                                                          |
| N | A9HVA1 | DE | Chromosomal replication initiator protein DnaA;                                                                                                                                                                                         |
| N | A9HVA1 | DR | DNA replication origin binding                                                                                                                                                                                                          |
| N | A9HVA1 | DR | DNA-dependent DNA replication initiation                                                                                                                                                                                                |
| N | A9HVA1 | DR | nucleoside-triphosphatase activity                                                                                                                                                                                                      |

|   |        |    |                                                                                                                                                                                                                                         |
|---|--------|----|-----------------------------------------------------------------------------------------------------------------------------------------------------------------------------------------------------------------------------------------|
| N | A9HVA1 | DR | regulation of DNA replication                                                                                                                                                                                                           |
| N | A9ISC1 | CC | Involved in protein export                                                                                                                                                                                                              |
| N | A9ISC1 | CC | Acts as a chaperone by maintaining the newly synthesized protein in an open conformation (By similarity).                                                                                                                               |
| N | A9ISC1 | DE | Trigger factor;                                                                                                                                                                                                                         |
| N | A9ISC1 | DR | cell division                                                                                                                                                                                                                           |
| N | A9ISC1 | DR | peptidyl-prolyl cis-trans isomerase activity                                                                                                                                                                                            |
| N | A9ISC1 | DR | protein folding                                                                                                                                                                                                                         |
| N | A9ISC1 | DR | protein transport                                                                                                                                                                                                                       |
| N | A9IUA2 | CC | Required for the thiolation of cytidine in position 32 of tRNA, to form 2-thiocytidine (s(2)C32) (By similarity).                                                                                                                       |
| N | A9IUA2 | DE | tRNA 2-thiocytidine biosynthesis protein TtcA;                                                                                                                                                                                          |
| N | A9IUA2 | DR | tRNA processing                                                                                                                                                                                                                         |
| N | A9IVC5 | CC | Interconversion of serine and glycine (By similarity).                                                                                                                                                                                  |
| N | A9IVC5 | DE | Serine hydroxymethyltransferase;                                                                                                                                                                                                        |
| N | A9IVC5 | DE | Serine methylase;                                                                                                                                                                                                                       |
| N | A9IVC5 | DR | L-serine metabolic process                                                                                                                                                                                                              |
| N | A9IVC5 | DR | glycine hydroxymethyltransferase activity                                                                                                                                                                                               |
| N | A9IVC5 | DR | glycine metabolic process                                                                                                                                                                                                               |
| N | A9IVC5 | DR | one-carbon metabolic process                                                                                                                                                                                                            |
| N | A9IVC5 | DR | pyridoxal phosphate binding                                                                                                                                                                                                             |
| N | A9IWA2 | CC | Cell wall formation (By similarity).                                                                                                                                                                                                    |
| N | A9IWA2 | DE | D-Ala-D-Ala ligase;                                                                                                                                                                                                                     |
| N | A9IWA2 | DE | D-alanine--D-alanine ligase;                                                                                                                                                                                                            |
| N | A9IWA2 | DE | D-alanylalanine synthetase;                                                                                                                                                                                                             |
| N | A9IWA2 | DR | D-alanine-D-alanine ligase activity                                                                                                                                                                                                     |
| N | A9IWA2 | DR | cellular cell wall organization                                                                                                                                                                                                         |
| N | A9IWA2 | DR | metal ion binding                                                                                                                                                                                                                       |
| N | A9IWA2 | DR | peptidoglycan biosynthetic process                                                                                                                                                                                                      |
| N | A9IWA2 | DR | regulation of cell shape                                                                                                                                                                                                                |
| N | A9JSQ8 | DE | Protein FAM195B;                                                                                                                                                                                                                        |
| N | A9KBK4 | CC | NDH-1 shuttles electrons from NADH, via FMN and iron- sulfur (Fe-S) centers, to quinones in the respiratory chain                                                                                                                       |
| N | A9KBK4 | CC | Couples the redox reaction to proton translocation (for every two electrons transferred, four hydrogen ions are translocated across the cytoplasmic membrane), and thus conserves the redox energy in a proton gradient (By similarity) |
| N | A9KBK4 | CC | The immediate electron acceptor for the enzyme in this species is believed to be ubiquinone                                                                                                                                             |
| N | A9KBK4 | DE | NADH dehydrogenase I subunit A;                                                                                                                                                                                                         |
| N | A9KBK4 | DE | NADH-quinone oxidoreductase subunit A;                                                                                                                                                                                                  |
| N | A9KBK4 | DE | NDH-1 subunit A;                                                                                                                                                                                                                        |
| N | A9KBK4 | DR | NADH dehydrogenase (ubiquinone) activity                                                                                                                                                                                                |
| N | A9KBK4 | DR | oxidation-reduction process                                                                                                                                                                                                             |
| N | A9KBK4 | DR | quinone binding                                                                                                                                                                                                                         |
| N | A9KGN7 | CC | Catalyzes the synthesis of the hydroxymethylpyrimidine phosphate (HMP-P) moiety of thiamine from aminoimidazole ribotide (AIR) in a radical S-adenosyl-L-methionine (SAM)-dependent reaction (By similarity).                           |
| N | A9KGN7 | DE | HMP-P synthase;                                                                                                                                                                                                                         |
| N | A9KGN7 | DE | HMP-phosphate synthase;                                                                                                                                                                                                                 |
| N | A9KGN7 | DE | HMPP synthase;                                                                                                                                                                                                                          |
| N | A9KGN7 | DE | Hydroxymethylpyrimidine phosphate synthase;                                                                                                                                                                                             |
| N | A9KGN7 | DE | Phosphomethylpyrimidine synthase;                                                                                                                                                                                                       |
| N | A9KGN7 | DE | Thiamine biosynthesis protein thiC;                                                                                                                                                                                                     |
| N | A9KGN7 | DR | 4 iron, 4 sulfur cluster binding                                                                                                                                                                                                        |
| N | A9KGN7 | DR | lyase activity                                                                                                                                                                                                                          |
| N | A9KGN7 | DR | metal ion binding                                                                                                                                                                                                                       |
| N | A9KGN7 | DR | thiamine biosynthetic process                                                                                                                                                                                                           |
| N | A9KJ36 | CC | Catalyzes the attachment of glycine to tRNA(Gly) (By similarity).                                                                                                                                                                       |
| N | A9KJ36 | DE | Glycine--tRNA ligase;                                                                                                                                                                                                                   |
| N | A9KJ36 | DE | Glycyl-tRNA synthetase;                                                                                                                                                                                                                 |
| N | A9KJ36 | DR | glycine-tRNA ligase activity                                                                                                                                                                                                            |
| N | A9KJ36 | DR | glycyl-tRNA aminoacylation                                                                                                                                                                                                              |
| N | A9KJ36 | DR | protein dimerization activity                                                                                                                                                                                                           |
| N | A9KJS0 | DE | Urea amidohydrolase subunit beta;                                                                                                                                                                                                       |
| N | A9KJS0 | DE | Urease subunit beta;                                                                                                                                                                                                                    |



|   |        |    |                                                                                                                                                                                                                    |
|---|--------|----|--------------------------------------------------------------------------------------------------------------------------------------------------------------------------------------------------------------------|
| N | A9KJS0 | DR | nickel ion binding                                                                                                                                                                                                 |
| N | A9KJS0 | DR | nitrogen compound metabolic process                                                                                                                                                                                |
| N | A9KJS0 | DR | urease activity                                                                                                                                                                                                    |
| N | A9KNJ3 | DE | Aspartate carbamoyltransferase;                                                                                                                                                                                    |
| N | A9KNJ3 | DE | Aspartate transcarbamylase;                                                                                                                                                                                        |
| N | A9KNJ3 | DR | 'de novo' pyrimidine base biosynthetic process                                                                                                                                                                     |
| N | A9KNJ3 | DR | amino acid binding                                                                                                                                                                                                 |
| N | A9KNJ3 | DR | aspartate carbamoyltransferase activity                                                                                                                                                                            |
| N | A9KNJ3 | DR | cellular amino acid metabolic process                                                                                                                                                                              |
| N | A9KNJ3 | DR | pyrimidine nucleotide biosynthetic process                                                                                                                                                                         |
| N | A9KP86 | DE | Glutamate-1-semialdehyde 2,1-aminomutase 1;                                                                                                                                                                        |
| N | A9KP86 | DE | Glutamate-1-semialdehyde aminotransferase 1;                                                                                                                                                                       |
| N | A9KP86 | DR | glutamate-1-semialdehyde 2,1-aminomutase activity                                                                                                                                                                  |
| N | A9KP86 | DR | porphyrin biosynthetic process                                                                                                                                                                                     |
| N | A9KP86 | DR | pyridoxal phosphate binding                                                                                                                                                                                        |
| N | A9KP86 | DR | transaminase activity                                                                                                                                                                                              |
| N | A9KVD6 | DE | Putative hydrolase Sbal195_1503;                                                                                                                                                                                   |
| N | A9KVD6 | DR | DNA replication                                                                                                                                                                                                    |
| N | A9KVD6 | DR | DNA-directed DNA polymerase activity                                                                                                                                                                               |
| N | A9KVD6 | DR | hydrolase activity                                                                                                                                                                                                 |
| N | A9KVD6 | DR | metal ion binding                                                                                                                                                                                                  |
| N | A9L0P6 | CC | Specifically methylates the cytosine at position 1962 (m5C1962) of 23S rRNA (By similarity).                                                                                                                       |
| N | A9L0P6 | DE | 23S rRNA m5C1962 methyltransferase;                                                                                                                                                                                |
| N | A9L0P6 | DE | Ribosomal RNA large subunit methyltransferase I;                                                                                                                                                                   |
| N | A9L0P6 | DE | rRNA (cytosine-C(5)-)-methyltransferase RlmI;                                                                                                                                                                      |
| N | A9L0P6 | DR | rRNA methyltransferase activity                                                                                                                                                                                    |
| N | A9L375 | DE | D-fructose-1,6-bisphosphate 1-phosphohydrolase class 1;                                                                                                                                                            |
| N | A9L375 | DE | FBPase class 1;                                                                                                                                                                                                    |
| N | A9L375 | DE | Fructose-1,6-bisphosphatase class 1;                                                                                                                                                                               |
| N | A9L375 | DR | carbohydrate metabolic process                                                                                                                                                                                     |
| N | A9L375 | DR | fructose 1,6-bisphosphate 1-phosphatase activity                                                                                                                                                                   |
| N | A9L375 | DR | metal ion binding                                                                                                                                                                                                  |
| N | A9L3W0 | CC | Catalyzes the transfer of a dimethylallyl group onto the adenine at position 37 in tRNAs that read codons beginning with uridine, leading to the formation of N6-(dimethylallyl)adenosine (i(6)A) (By similarity). |
| N | A9L3W0 | DE | DMAPP:tRNA dimethylallyltransferase;                                                                                                                                                                               |
| N | A9L3W0 | DE | Dimethylallyl diphosphate:tRNA dimethylallyltransferase;                                                                                                                                                           |
| N | A9L3W0 | DE | IPP transferase;                                                                                                                                                                                                   |
| N | A9L3W0 | DE | Isopentenyl-diphosphate:tRNA isopentenyltransferase;                                                                                                                                                               |
| N | A9L3W0 | DE | tRNA dimethylallyltransferase;                                                                                                                                                                                     |
| N | A9L3W0 | DR | tRNA dimethylallyltransferase activity                                                                                                                                                                             |
| N | A9L3W0 | DR | tRNA processing                                                                                                                                                                                                    |
| N | A9LYH4 | DE | 30S ribosomal protein S2, chloroplastic;                                                                                                                                                                           |
| N | A9LYH4 | DR | structural constituent of ribosome                                                                                                                                                                                 |
| N | A9M1D3 | CC | Required for maturation of 30S ribosomal subunits (By similarity).                                                                                                                                                 |
| N | A9M1D3 | DE | Ribosome maturation factor rimP;                                                                                                                                                                                   |
| N | A9M1D3 | DR | ribosome biogenesis                                                                                                                                                                                                |
| N | A9M3T2 | CC | Oxidative deamination of D-amino acids (By similarity).                                                                                                                                                            |
| N | A9M3T2 | DE | D-amino acid dehydrogenase small subunit;                                                                                                                                                                          |
| N | A9M3T2 | DR | D-amino-acid dehydrogenase activity                                                                                                                                                                                |
| N | A9M3T2 | DR | oxidation-reduction process                                                                                                                                                                                        |
| N | A9M3X2 | CC | With S4 and S5 plays an important role in translational accuracy (By similarity).                                                                                                                                  |
| N | A9M3X2 | DE | 30S ribosomal protein S12;                                                                                                                                                                                         |
| N | A9M3X2 | DR | structural constituent of ribosome                                                                                                                                                                                 |
| N | A9M7K1 | CC | The ruvA-ruvB complex in the presence of ATP renatures cruciform structure in supercoiled DNA with palindromic sequence, indicating that it may promote strand exchange reactions in homologous recombination      |
| N | A9M7K1 | CC | RuvA stimulates, in the presence of DNA, the weak ATPase activity of ruvB (By similarity).                                                                                                                         |
| N | A9M7K1 | CC | RuvAB is an helicase that mediates the Holliday junction migration by localized denaturation and reannealing                                                                                                       |
| N | A9M7K1 | DE | Holliday junction ATP-dependent DNA helicase ruvA;                                                                                                                                                                 |
| N | A9M7K1 | DR | DNA recombination                                                                                                                                                                                                  |
| N | A9M7K1 | DR | four-way junction helicase activity                                                                                                                                                                                |

|   |        |    |                                                                                                                                                                                                    |
|---|--------|----|----------------------------------------------------------------------------------------------------------------------------------------------------------------------------------------------------|
| N | A9M9S1 | DE | Pantothenate kinase;                                                                                                                                                                               |
| N | A9M9S1 | DE | Pantothenic acid kinase;                                                                                                                                                                           |
| N | A9M9S1 | DR | coenzyme A biosynthetic process                                                                                                                                                                    |
| N | A9M9S1 | DR | pantothenate kinase activity                                                                                                                                                                       |
| N | A9MAJ9 | CC | Catalyzes the attachment of proline to tRNA(Pro) in a two-step reaction: proline is first activated by ATP to form Pro- AMP and then transferred to the acceptor end of tRNA(Pro) (By similarity). |
| N | A9MAJ9 | DE | Proline--tRNA ligase;                                                                                                                                                                              |
| N | A9MAJ9 | DE | Prolyl-tRNA synthetase;                                                                                                                                                                            |
| N | A9MAJ9 | DR | proline-tRNA ligase activity                                                                                                                                                                       |
| N | A9MAJ9 | DR | prolyl-tRNA aminoacylation                                                                                                                                                                         |
| N | A9MF17 | CC | Component of the sulfite reductase complex that catalyzes the 6-electron reduction of sulfite to sulfide                                                                                           |
| N | A9MF17 | CC | This is one of several activities required for the biosynthesis of L- cysteine from sulfate (By similarity).                                                                                       |
| N | A9MF17 | DE | Sulfite reductase [NADPH] hemoprotein beta-component;                                                                                                                                              |
| N | A9MF17 | DR | 4 iron, 4 sulfur cluster binding                                                                                                                                                                   |
| N | A9MF17 | DR | cysteine biosynthetic process                                                                                                                                                                      |
| N | A9MF17 | DR | oxidation-reduction process                                                                                                                                                                        |
| N | A9MF17 | DR | sulfite reductase (NADPH) activity                                                                                                                                                                 |
| N | A9MH00 | DE | Dihydroorotase;                                                                                                                                                                                    |
| N | A9MH00 | DR | dihydroorotase activity                                                                                                                                                                            |
| N | A9MH00 | DR | metal ion binding                                                                                                                                                                                  |
| N | A9MH00 | DR | pyrimidine base biosynthetic process                                                                                                                                                               |
| N | A9MH00 | DR | pyrimidine nucleotide biosynthetic process                                                                                                                                                         |
| N | A9MHJ7 | CC | Co-chaperone involved in the maturation of iron-sulfur cluster-containing proteins                                                                                                                 |
| N | A9MHJ7 | CC | Seems to help targeting proteins to be folded toward hscA (By similarity).                                                                                                                         |
| N | A9MHJ7 | DE | Co-chaperone protein hscB;                                                                                                                                                                         |
| N | A9MHJ7 | DR | chaperone binding                                                                                                                                                                                  |
| N | A9MHJ7 | DR | heat shock protein binding                                                                                                                                                                         |
| N | A9MHJ7 | DR | protein folding                                                                                                                                                                                    |
| N | A9MHV9 | CC | Plays a central role in chromosome condensation, segregation and cell cycle progression                                                                                                            |
| N | A9MHV9 | CC | Functions as a homodimer, which is essential for chromosome partition                                                                                                                              |
| N | A9MHV9 | CC | Involved in negative DNA supercoiling in vivo, and by this means organize and compact chromosomes                                                                                                  |
| N | A9MHV9 | CC | May achieve or facilitate chromosome segregation by condensation DNA from both sides of a centrally located replisome during cell division (By similarity).                                        |
| N | A9MHV9 | DE | Chromosome partition protein mukB;                                                                                                                                                                 |
| N | A9MHV9 | DE | Structural maintenance of chromosome-related protein;                                                                                                                                              |
| N | A9MHV9 | DR | cell division                                                                                                                                                                                      |
| N | A9MHV9 | DR | chromosome condensation                                                                                                                                                                            |
| N | A9MHV9 | DR | chromosome segregation                                                                                                                                                                             |
| N | A9MLC3 | DE | L-lactate dehydrogenase [cytochrome];                                                                                                                                                              |
| N | A9MLC3 | DR | L-lactate dehydrogenase (cytochrome) activity                                                                                                                                                      |
| N | A9MLC3 | DR | lactate metabolic process                                                                                                                                                                          |
| N | A9MLC3 | DR | oxidation-reduction process                                                                                                                                                                        |
| N | A9MM62 | DE | Universal stress protein B;                                                                                                                                                                        |
| N | A9MN71 | CC | One of the primary rRNA binding proteins, it binds directly to 16S rRNA where it nucleates assembly of the body of the 30S subunit (By similarity).                                                |
| N | A9MN71 | DE | 30S ribosomal protein S4;                                                                                                                                                                          |
| N | A9MN71 | DR | structural constituent of ribosome                                                                                                                                                                 |
| N | A9MNY0 | CC | This protein is one of the early assembly proteins of the 50S ribosomal subunit, although it is not seen to bind rRNA by itself                                                                    |
| N | A9MNY0 | CC | It is important during the early stages of 50S assembly (By similarity).                                                                                                                           |
| N | A9MNY0 | DE | 50S ribosomal protein L13;                                                                                                                                                                         |
| N | A9MNY0 | DR | structural constituent of ribosome                                                                                                                                                                 |
| N | A9MQA5 | DE | UPF0289 protein yacF;                                                                                                                                                                              |
| N | A9MQH4 | CC | Catalyzes the exchange of L-carnitine for gamma- butyrobetaine and related betaines (By similarity).                                                                                               |
| N | A9MQH4 | DE | L-carnitine/gamma-butyrobetaine antiporter;                                                                                                                                                        |
| N | A9MQH4 | DR | antiporter activity                                                                                                                                                                                |
| N | A9MTI7 | CC | Catalyzes the decarboxylative condensation of pimeloyl- CoA and L-alanine to produce 8-amino-7-oxononanoate (AON), coenzyme A, and carbon dioxide (By similarity)                                  |
| N | A9MTI7 | DE | 7-KAP synthase;                                                                                                                                                                                    |
| N | A9MTI7 | DE | 7-keto-8-amino-pelargonic acid synthase;                                                                                                                                                           |

|   |        |    |                                                                                                                                                                                                                                                                         |
|---|--------|----|-------------------------------------------------------------------------------------------------------------------------------------------------------------------------------------------------------------------------------------------------------------------------|
| N | A9MTI7 | DE | 8-amino-7-ketopelargonate synthase;                                                                                                                                                                                                                                     |
| N | A9MTI7 | DE | 8-amino-7-oxononanoate synthase;                                                                                                                                                                                                                                        |
| N | A9MTI7 | DE | KAPA synthase;                                                                                                                                                                                                                                                          |
| N | A9MTI7 | DE | L-alanine--pimeloyl-CoA ligase;                                                                                                                                                                                                                                         |
| N | A9MTI7 | DR | 8-amino-7-oxononanoate synthase activity                                                                                                                                                                                                                                |
| N | A9MTI7 | DR | biotin biosynthetic process                                                                                                                                                                                                                                             |
| N | A9MTI7 | DR | pyridoxal phosphate binding                                                                                                                                                                                                                                             |
| N | A9MTI7 | DR | transferase activity, transferring nitrogenous groups                                                                                                                                                                                                                   |
| N | A9MW53 | DE | Ureidoglycolate hydrolase;                                                                                                                                                                                                                                              |
| N | A9MW53 | DR | allantoin catabolic process                                                                                                                                                                                                                                             |
| N | A9MW53 | DR | purine base metabolic process                                                                                                                                                                                                                                           |
| N | A9MW53 | DR | ureidoglycolate hydrolase activity                                                                                                                                                                                                                                      |
| N | A9MXI2 | CC | Acts as a chaperone (By similarity).                                                                                                                                                                                                                                    |
| N | A9MXI2 | DE | Chaperone protein DnaK;                                                                                                                                                                                                                                                 |
| N | A9MXI2 | DE | Heat shock 70 kDa protein;                                                                                                                                                                                                                                              |
| N | A9MXI2 | DE | Heat shock protein 70;                                                                                                                                                                                                                                                  |
| N | A9MXI2 | DR | protein folding                                                                                                                                                                                                                                                         |
| N | A9MXI2 | DR | response to stress                                                                                                                                                                                                                                                      |
| N | A9MXI2 | DR | unfolded protein binding                                                                                                                                                                                                                                                |
| N | A9N1X3 | CC | Regulates the transcription of several operons and genes involved in the biogenesis of Fe-S clusters and Fe-S-containing proteins (By similarity).                                                                                                                      |
| N | A9N1X3 | DE | HTH-type transcriptional regulator iscR;                                                                                                                                                                                                                                |
| N | A9N1X3 | DR | 2 iron, 2 sulfur cluster binding                                                                                                                                                                                                                                        |
| N | A9N1X3 | DR | double-stranded DNA binding                                                                                                                                                                                                                                             |
| N | A9N1X3 | DR | metal ion binding                                                                                                                                                                                                                                                       |
| N | A9N1X3 | DR | regulation of transcription, DNA-dependent                                                                                                                                                                                                                              |
| N | A9N1X3 | DR | sequence-specific DNA binding transcription factor activity                                                                                                                                                                                                             |
| N | A9N275 | CC | Catalyzes the hydrolysis of N(2)-succinylarginine into N(2)-succinylornithine, ammonia and CO(2) (By similarity).                                                                                                                                                       |
| N | A9N275 | DE | N-succinylarginine dihydrolase;                                                                                                                                                                                                                                         |
| N | A9N275 | DR | N-succinylarginine dihydrolase activity                                                                                                                                                                                                                                 |
| N | A9N275 | DR | arginine metabolic process                                                                                                                                                                                                                                              |
| N | A9N4P2 | DE | UPF0301 protein yqgE;                                                                                                                                                                                                                                                   |
| N | A9N4Y6 | CC | RNA chaperone that binds small regulatory RNA (sRNAs) and mRNAs to facilitate mRNA translational regulation in response to envelope stress, environmental stress and changes in metabolite concentrations                                                               |
| N | A9N4Y6 | CC | Also binds with high specificity to tRNAs (By similarity).                                                                                                                                                                                                              |
| N | A9N4Y6 | DE | Host factor-I protein;                                                                                                                                                                                                                                                  |
| N | A9N4Y6 | DE | Protein hfq;                                                                                                                                                                                                                                                            |
| N | A9N4Y6 | DR | regulation of transcription, DNA-dependent                                                                                                                                                                                                                              |
| N | A9N4Y6 | DR | response to stress                                                                                                                                                                                                                                                      |
| N | A9N6Z8 | CC | Catalytic subunit of the tagatose-1,6-bisphosphate aldolase GatYZ, which catalyzes the reversible aldol condensation of dihydroxyacetone phosphate (DHAP or glyceraldehyde-phosphate) with glyceraldehyde 3-phosphate (G3P) to produce tagatose 1,6- bisphosphate (TBP) |
| N | A9N6Z8 | CC | Is involved in the catabolism of galactitol (By similarity).                                                                                                                                                                                                            |
| N | A9N6Z8 | CC | Requires GatZ subunit for full activity and stability                                                                                                                                                                                                                   |
| N | A9N6Z8 | DE | D-tagatose-1,6-bisphosphate aldolase subunit GatY;                                                                                                                                                                                                                      |
| N | A9N6Z8 | DE | D-tagatose-bisphosphate aldolase class II;                                                                                                                                                                                                                              |
| N | A9N6Z8 | DE | TagBP aldolase;                                                                                                                                                                                                                                                         |
| N | A9N6Z8 | DE | Tagatose-bisphosphate aldolase;                                                                                                                                                                                                                                         |
| N | A9N6Z8 | DR | fructose-bisphosphate aldolase activity                                                                                                                                                                                                                                 |
| N | A9N6Z8 | DR | galactitol metabolic process                                                                                                                                                                                                                                            |
| N | A9N6Z8 | DR | lactose catabolic process via tagatose-6-phosphate                                                                                                                                                                                                                      |
| N | A9N6Z8 | DR | tagatose-bisphosphate aldolase activity                                                                                                                                                                                                                                 |
| N | A9N6Z8 | DR | zinc ion binding                                                                                                                                                                                                                                                        |
| N | A9N7T9 | CC | Involved in chromosome condensation, segregation and cell cycle progression                                                                                                                                                                                             |
| N | A9N7T9 | CC | It has a calcium binding activity (By similarity).                                                                                                                                                                                                                      |
| N | A9N7T9 | CC | May participate in facilitating chromosome segregation by condensation DNA from both sides of a centrally located replisome during cell division                                                                                                                        |
| N | A9N7T9 | CC | Not required for mini-F plasmid partitioning                                                                                                                                                                                                                            |
| N | A9N7T9 | CC | Overexpression results in anucleate cells                                                                                                                                                                                                                               |
| N | A9N7T9 | CC | Probably acts via its interaction with mukB and mukE                                                                                                                                                                                                                    |
| N | A9N7T9 | DE | Chromosome partition protein mukF;                                                                                                                                                                                                                                      |
| N | A9N7T9 | DR | DNA replication                                                                                                                                                                                                                                                         |

|   |        |    |                                                                                                                                                                                                            |
|---|--------|----|------------------------------------------------------------------------------------------------------------------------------------------------------------------------------------------------------------|
| N | A9N7T9 | DR | calcium ion binding                                                                                                                                                                                        |
| N | A9N7T9 | DR | cell division                                                                                                                                                                                              |
| N | A9N7T9 | DR | chromosome condensation                                                                                                                                                                                    |
| N | A9N7T9 | DR | chromosome segregation                                                                                                                                                                                     |
| N | A9N7U7 | CC | Transfers the gamma-phosphate of ATP to the 4'-position of a tetraacyldisaccharide 1-phosphate intermediate (termed DS-1- P) to form tetraacyldisaccharide 1,4'-bis-phosphate (lipid IVA) (By similarity). |
| N | A9N7U7 | DE | Lipid A 4'-kinase;                                                                                                                                                                                         |
| N | A9N7U7 | DE | Tetraacyldisaccharide 4'-kinase;                                                                                                                                                                           |
| N | A9N7U7 | DR | lipid A biosynthetic process                                                                                                                                                                               |
| N | A9N7U7 | DR | tetraacyldisaccharide 4'-kinase activity                                                                                                                                                                   |
| N | A9N8H8 | CC | Catalyzes the phosphorylation of NAD to NADP                                                                                                                                                               |
| N | A9N8H8 | CC | Utilizes ATP and other nucleoside triphosphates as well as inorganic polyphosphate as a source of phosphorus (By similarity).                                                                              |
| N | A9N8H8 | DE | Poly(P)/ATP NAD kinase;                                                                                                                                                                                    |
| N | A9N8H8 | DE | Probable inorganic polyphosphate/ATP-NAD kinase;                                                                                                                                                           |
| N | A9N8H8 | DR | NAD+ kinase activity                                                                                                                                                                                       |
| N | A9NCE2 | DE | UPF0133 protein COXBURSA331_A0772;                                                                                                                                                                         |
| N | A9NEF8 | CC | Located at the top of the head of the 30S subunit, it contacts several helices of the 16S rRNA                                                                                                             |
| N | A9NEF8 | CC | Contacts the tRNAs in the A and P- sites (By similarity).                                                                                                                                                  |
| N | A9NEF8 | CC | In the 70S ribosome it contacts the 23S rRNA (bridge B1a) and protein L5 of the 50S subunit (bridge B1b), connecting the 2 subunits; these bridges are implicated in subunit movement                      |
| N | A9NEF8 | DE | 30S ribosomal protein S13;                                                                                                                                                                                 |
| N | A9NEF8 | DR | structural constituent of ribosome                                                                                                                                                                         |
| N | A9QQ26 | DE | Venom allergen 5;                                                                                                                                                                                          |
| N | A9QYS2 | DE | L-rhamnose isomerase;                                                                                                                                                                                      |
| N | A9QYS2 | DR | L-rhamnose isomerase activity                                                                                                                                                                              |
| N | A9QYS2 | DR | manganese ion binding                                                                                                                                                                                      |
| N | A9QYS2 | DR | rhamnose metabolic process                                                                                                                                                                                 |
| N | A9R0U5 | DE | 30S ribosomal protein S16;                                                                                                                                                                                 |
| N | A9R0U5 | DR | structural constituent of ribosome                                                                                                                                                                         |
| N | A9R1J4 | CC | Catalyzes the irreversible NADPH-dependent deamination of GMP to IMP                                                                                                                                       |
| N | A9R1J4 | CC | It functions in the conversion of nucleobase, nucleoside and nucleotide derivatives of G to A nucleotides, and in maintaining the intracellular balance of A and G nucleotides (By similarity).            |
| N | A9R1J4 | DE | GMP reductase;                                                                                                                                                                                             |
| N | A9R1J4 | DE | Guanosine 5'-monophosphate oxidoreductase;                                                                                                                                                                 |
| N | A9R1J4 | DE | Guanosine monophosphate reductase;                                                                                                                                                                         |
| N | A9R1J4 | DR | GMP reductase activity                                                                                                                                                                                     |
| N | A9R1J4 | DR | metal ion binding                                                                                                                                                                                          |
| N | A9R1J4 | DR | nucleotide metabolic process                                                                                                                                                                               |
| N | A9R1J4 | DR | oxidation-reduction process                                                                                                                                                                                |
| N | A9R3Y7 | CC | Acts as a radical domain for damaged PFL and possibly other radical proteins (By similarity).                                                                                                              |
| N | A9R3Y7 | DE | Autonomous glycyl radical cofactor;                                                                                                                                                                        |
| N | A9R3Y7 | DR | catalytic activity                                                                                                                                                                                         |
| N | A9R3Z3 | CC | Specifically methylates the adenine in position 37 of tRNA(Val) (By similarity).                                                                                                                           |
| N | A9R3Z3 | DE | tRNA (adenine-N(6)-)-methyltransferase;                                                                                                                                                                    |
| N | A9R3Z3 | DE | tRNA m6A37 methyltransferase;                                                                                                                                                                              |
| N | A9R3Z3 | DR | nucleic acid binding                                                                                                                                                                                       |
| N | A9R3Z3 | DR | tRNA (adenine-N6-)-methyltransferase activity                                                                                                                                                              |
| N | A9R6N5 | CC | Conversion of NADPH, generated by peripheral catabolic pathways, to NADH, which can enter the respiratory chain for energy generation (By similarity).                                                     |
| N | A9R6N5 | DE | NAD(P)(+) transhydrogenase [B-specific];                                                                                                                                                                   |
| N | A9R6N5 | DE | Soluble pyridine nucleotide transhydrogenase;                                                                                                                                                              |
| N | A9R6N5 | DR | NAD(P)+ transhydrogenase (B-specific) activity                                                                                                                                                             |
| N | A9R6N5 | DR | cell redox homeostasis                                                                                                                                                                                     |
| N | A9R6N5 | DR | flavin adenine dinucleotide binding                                                                                                                                                                        |
| N | A9R6N5 | DR | oxidation-reduction process                                                                                                                                                                                |
| N | A9R7S4 | CC | Catalyzes the reversible isomerization-deamination of glucosamine 6-phosphate (GlcN6P) to form fructose 6-phosphate (Fru6P) and ammonium ion (By similarity)                                               |
| N | A9R7S4 | DE | GlcN6P deaminase;                                                                                                                                                                                          |
| N | A9R7S4 | DE | Glucosamine-6-phosphate deaminase;                                                                                                                                                                         |

|   |        |    |                                                                                                                                                                                                                                                                                                    |
|---|--------|----|----------------------------------------------------------------------------------------------------------------------------------------------------------------------------------------------------------------------------------------------------------------------------------------------------|
| N | A9R7S4 | DE | Glucosamine-6-phosphate isomerase;                                                                                                                                                                                                                                                                 |
| N | A9R7S4 | DR | N-acetylglucosamine metabolic process                                                                                                                                                                                                                                                              |
| N | A9R7S4 | DR | glucosamine-6-phosphate deaminase activity                                                                                                                                                                                                                                                         |
| N | A9R7S4 | DR | hydrolase activity                                                                                                                                                                                                                                                                                 |
| N | A9SB31 | DE | UPF0497 membrane protein 11;                                                                                                                                                                                                                                                                       |
| N | A9ULE9 | CC | May function as a co-chaperone.                                                                                                                                                                                                                                                                    |
| N | A9ULE9 | DE | DnaJ homolog subfamily C member 22;                                                                                                                                                                                                                                                                |
| N | A9ULE9 | DR | heat shock protein binding                                                                                                                                                                                                                                                                         |
| N | A9ULE9 | DR | protein folding                                                                                                                                                                                                                                                                                    |
| N | A9ULE9 | DR | unfolded protein binding                                                                                                                                                                                                                                                                           |
| N | A9VGD4 | CC | bidirectionally degrades single-stranded DNA into large acid-insoluble oligonucleotides, which are then degraded further into small acid-soluble oligonucleotides (By similarity)                                                                                                                  |
| N | A9VGD4 | DE | Exodeoxyribonuclease 7 large subunit;                                                                                                                                                                                                                                                              |
| N | A9VGD4 | DE | Exodeoxyribonuclease VII large subunit;                                                                                                                                                                                                                                                            |
| N | A9VGD4 | DE | Exonuclease VII large subunit;                                                                                                                                                                                                                                                                     |
| N | A9VGD4 | DR | DNA catabolic process                                                                                                                                                                                                                                                                              |
| N | A9VGD4 | DR | exodeoxyribonuclease VII activity                                                                                                                                                                                                                                                                  |
| N | A9VGD4 | DR | nucleic acid binding                                                                                                                                                                                                                                                                               |
| N | A9VG11 | DE | UPF0342 protein BcerKBAB4_0767;                                                                                                                                                                                                                                                                    |
| N | A9VJM6 | DE | Small, acid-soluble spore protein I;                                                                                                                                                                                                                                                               |
| N | A9VJM6 | DR | sporulation resulting in formation of a cellular spore                                                                                                                                                                                                                                             |
| N | A9VM77 | CC | Catalyzes the thiamine diphosphate-dependent decarboxylation of 2-oxoglutarate and the subsequent addition of the resulting succinic semialdehyde-thiamine pyrophosphate anion to isochorismate to yield 2-succinyl-5-enolpyruvyl-6-hydroxy-3-cyclohexene-1-carboxylate (SEPHCHC) (By similarity). |
| N | A9VM77 | DE | 2-succinyl-5-enolpyruvyl-6-hydroxy-3-cyclohexene-1-carboxylate synthase;                                                                                                                                                                                                                           |
| N | A9VM77 | DE | Menaquinone biosynthesis protein menD;                                                                                                                                                                                                                                                             |
| N | A9VM77 | DE | SEPHCHC synthase;                                                                                                                                                                                                                                                                                  |
| N | A9VM77 | DR | 2-succinyl-5-enolpyruvyl-6-hydroxy-3-cyclohexene-1-carboxylic-acid synthase activity                                                                                                                                                                                                               |
| N | A9VM77 | DR | menaquinone biosynthetic process                                                                                                                                                                                                                                                                   |
| N | A9VM77 | DR | metal ion binding                                                                                                                                                                                                                                                                                  |
| N | A9VM77 | DR | thiamine pyrophosphate binding                                                                                                                                                                                                                                                                     |
| N | A9VN96 | CC | Participates in a DNA-damage check-point that is active prior to asymmetric division when DNA is damaged                                                                                                                                                                                           |
| N | A9VN96 | CC | DisA forms globular foci that rapidly scan along the chromosomes during sporulation, searching for lesions                                                                                                                                                                                         |
| N | A9VN96 | CC | This triggers a cellular response that culminates in a temporary block in sporulation initiation (By similarity).                                                                                                                                                                                  |
| N | A9VN96 | CC | When a lesion is present, disA pauses at the lesion site                                                                                                                                                                                                                                           |
| N | A9VN96 | DE | DNA integrity scanning protein disA;                                                                                                                                                                                                                                                               |
| N | A9VPA1 | DE | 50S ribosomal protein L36;                                                                                                                                                                                                                                                                         |
| N | A9VPA1 | DR | structural constituent of ribosome                                                                                                                                                                                                                                                                 |
| N | A9VSD6 | CC | Catalyzes the ATP-dependent amination of UTP to CTP with either L-glutamine or ammonia as the source of nitrogen (By similarity).                                                                                                                                                                  |
| N | A9VSD6 | DE | CTP synthase;                                                                                                                                                                                                                                                                                      |
| N | A9VSD6 | DE | CTP synthetase;                                                                                                                                                                                                                                                                                    |
| N | A9VSD6 | DE | UTP--ammonia ligase;                                                                                                                                                                                                                                                                               |
| N | A9VSD6 | DR | CTP synthase activity                                                                                                                                                                                                                                                                              |
| N | A9VSD6 | DR | glutamine metabolic process                                                                                                                                                                                                                                                                        |
| N | A9VSD6 | DR | pyrimidine nucleotide biosynthetic process                                                                                                                                                                                                                                                         |
| N | A9VZN6 | DE | Protein ApaG;                                                                                                                                                                                                                                                                                      |
| N | A9W3L4 | DE | 50S ribosomal protein L33;                                                                                                                                                                                                                                                                         |
| N | A9W3L4 | DR | structural constituent of ribosome                                                                                                                                                                                                                                                                 |
| N | A9W606 | DE | 30S ribosomal protein S9;                                                                                                                                                                                                                                                                          |
| N | A9W606 | DR | structural constituent of ribosome                                                                                                                                                                                                                                                                 |
| N | A9W6R8 | CC | Participates actively in the response to hyperosmotic and heat shock by preventing the aggregation of stress-denatured proteins and by disaggregating proteins, also in an autonomous, dnaK-independent fashion                                                                                    |
| N | A9W6R8 | CC | Also involved, together with dnaK and grpE, in the DNA replication of plasmids through activation of initiation proteins (By similarity).                                                                                                                                                          |
| N | A9W6R8 | CC | GrpE releases ADP from dnaK; ATP binding to dnaK triggers the release of the substrate protein, thus completing the reaction cycle                                                                                                                                                                 |
| N | A9W6R8 | CC | Several rounds of ATP-dependent interactions between dnaJ, dnaK and grpE are required for fully efficient folding                                                                                                                                                                                  |

|   |        |    |                                                                                                                                                                       |
|---|--------|----|-----------------------------------------------------------------------------------------------------------------------------------------------------------------------|
| N | A9W6R8 | CC | Unfolded proteins bind initially to dnaJ; upon interaction with the dnaJ-bound protein, dnaK hydrolyzes its bound ATP, resulting in the formation of a stable complex |
| N | A9W6R8 | DE | Chaperone protein dnaJ;                                                                                                                                               |
| N | A9W6R8 | DR | DNA replication                                                                                                                                                       |
| N | A9W6R8 | DR | heat shock protein binding                                                                                                                                            |
| N | A9W6R8 | DR | metal ion binding                                                                                                                                                     |
| N | A9W6R8 | DR | protein folding                                                                                                                                                       |
| N | A9W6R8 | DR | response to heat                                                                                                                                                      |
| N | A9W6R8 | DR | unfolded protein binding                                                                                                                                              |
| N | A9W8D2 | CC | Catalyzes the methylthiolation of an aspartic acid residue of ribosomal protein S12 (By similarity).                                                                  |
| N | A9W8D2 | DE | Ribosomal protein S12 methylthiotransferase RimO;                                                                                                                     |
| N | A9W8D2 | DE | Ribosome maturation factor RimO;                                                                                                                                      |
| N | A9W8D2 | DE | S12 MTTase;                                                                                                                                                           |
| N | A9W8D2 | DE | S12 methylthiotransferase;                                                                                                                                            |
| N | A9W8D2 | DR | 4 iron, 4 sulfur cluster binding                                                                                                                                      |
| N | A9W8D2 | DR | RNA modification                                                                                                                                                      |
| N | A9W8D2 | DR | metal ion binding                                                                                                                                                     |
| N | A9W8D2 | DR | peptidyl-L-beta-methylglutamate acid biosynthetic process from peptidyl-aspartic acid                                                                                 |
| N | A9W8D2 | DR | transferase activity                                                                                                                                                  |
| N | A9WQA3 | DE | 1-(5-phosphoribosyl)-5-[(5-phosphoribosylamino)methylideneamino]imidazole-4-carboxamide isomerase;                                                                    |
| N | A9WQA3 | DE | Phosphoribosylformimino-5-aminoimidazole carboxamide ribotide isomerase;                                                                                              |
| N | A9WQA3 | DR | 1-(5-phosphoribosyl)-5-[(5-phosphoribosylamino)methylideneamino]imidazole-4-carboxamide isomerase activity                                                            |
| N | A9WQA3 | DR | histidine biosynthetic process                                                                                                                                        |
| N | A9WQA3 | DR | phosphoribosylanthranilate isomerase activity                                                                                                                         |
| N | A9WQA3 | DR | tryptophan biosynthetic process                                                                                                                                       |
| N | A9WSB2 | DE | Aspartate carbamoyltransferase;                                                                                                                                       |
| N | A9WSB2 | DE | Aspartate transcarbamylase;                                                                                                                                           |
| N | A9WSB2 | DR | 'de novo' pyrimidine base biosynthetic process                                                                                                                        |
| N | A9WSB2 | DR | amino acid binding                                                                                                                                                    |
| N | A9WSB2 | DR | aspartate carbamoyltransferase activity                                                                                                                               |
| N | A9WSB2 | DR | cellular amino acid metabolic process                                                                                                                                 |
| N | A9WSB2 | DR | pyrimidine nucleotide biosynthetic process                                                                                                                            |
| N | A9WYH0 | DE | DTB synthetase;                                                                                                                                                       |
| N | A9WYH0 | DE | Dethiobiotin synthase;                                                                                                                                                |
| N | A9WYH0 | DE | Dethiobiotin synthetase;                                                                                                                                              |
| N | A9WYH0 | DR | biotin biosynthetic process                                                                                                                                           |
| N | A9WYH0 | DR | dethiobiotin synthase activity                                                                                                                                        |
| N | A9WYH0 | DR | magnesium ion binding                                                                                                                                                 |
| N | B0B7M3 | CC | produces ATP from ADP in the presence of a proton gradient across the membrane                                                                                        |
| N | B0B7M3 | CC | The V-type beta chain is a regulatory subunit (By similarity).                                                                                                        |
| N | B0B7M3 | DE | V-ATPase subunit B;                                                                                                                                                   |
| N | B0B7M3 | DE | V-type ATP synthase beta chain;                                                                                                                                       |
| N | B0B7M3 | DR | ATP biosynthetic process                                                                                                                                              |
| N | B0B7M3 | DR | hydrogen ion transporting ATP synthase activity, rotational mechanism                                                                                                 |
| N | B0B7M3 | DR | proton-transporting ATPase activity, rotational mechanism                                                                                                             |
| N | B0B874 | CC | Major role in the synthesis of nucleoside triphosphates other than ATP                                                                                                |
| N | B0B874 | CC | The ATP gamma phosphate is transferred to the NDP beta phosphate via a ping-pong mechanism, using a phosphorylated active-site intermediate (By similarity).          |
| N | B0B874 | DE | NDP kinase;                                                                                                                                                           |
| N | B0B874 | DE | Nucleoside diphosphate kinase;                                                                                                                                        |
| N | B0B874 | DE | Nucleoside-2-P kinase;                                                                                                                                                |
| N | B0B874 | DR | CTP biosynthetic process                                                                                                                                              |
| N | B0B874 | DR | GTP biosynthetic process                                                                                                                                              |
| N | B0B874 | DR | UTP biosynthetic process                                                                                                                                              |
| N | B0B874 | DR | metal ion binding                                                                                                                                                     |
| N | B0B874 | DR | nucleoside diphosphate kinase activity                                                                                                                                |
| N | B0B898 | CC | Protein S19 forms a complex with S13 that binds strongly to the 16S ribosomal RNA (By similarity).                                                                    |
| N | B0B898 | DE | 30S ribosomal protein S19;                                                                                                                                            |
| N | B0B898 | DR | structural constituent of ribosome                                                                                                                                    |
| N | B0BAQ9 | CC | Binds to the 23S rRNA (By similarity).                                                                                                                                |
| N | B0BAQ9 | DE | 50S ribosomal protein L9;                                                                                                                                             |

|   |        |    |                                                                                                                                                     |
|---|--------|----|-----------------------------------------------------------------------------------------------------------------------------------------------------|
| N | B0BAQ9 | DR | structural constituent of ribosome                                                                                                                  |
| N | B0BNS7 | CC | Could accelerate the degradation of some genes transcripts potentially through selective RNA binding (By similarity).                               |
| N | B0BNS7 | DE | Carbon storage regulator homolog;                                                                                                                   |
| N | B0BNS7 | DR | mRNA catabolic process                                                                                                                              |
| N | B0BNS7 | DR | regulation of carbohydrate metabolic process                                                                                                        |
| N | B0BRH8 | CC | Cell wall formation (By similarity).                                                                                                                |
| N | B0BRH8 | DE | UDP-N-acetylmuramate--L-alanine ligase;                                                                                                             |
| N | B0BRH8 | DE | UDP-N-acetylmuramoyl-L-alanine synthetase;                                                                                                          |
| N | B0BRH8 | DR | UDP-N-acetylmuramate-L-alanine ligase activity                                                                                                      |
| N | B0BRH8 | DR | cell division                                                                                                                                       |
| N | B0BRH8 | DR | cellular cell wall organization                                                                                                                     |
| N | B0BRH8 | DR | peptidoglycan biosynthetic process                                                                                                                  |
| N | B0BRH8 | DR | regulation of cell shape                                                                                                                            |
| N | B0BS44 | CC | Catalyzes the isomerization between 2-isopropylmalate and 3-isopropylmalate, via the formation of 2-isopropylmaleate (By similarity).               |
| N | B0BS44 | DE | 3-isopropylmalate dehydratase large subunit;                                                                                                        |
| N | B0BS44 | DE | Alpha-IPM isomerase;                                                                                                                                |
| N | B0BS44 | DE | Isopropylmalate isomerase;                                                                                                                          |
| N | B0BS44 | DR | 3-isopropylmalate dehydratase activity                                                                                                              |
| N | B0BS44 | DR | 4 iron, 4 sulfur cluster binding                                                                                                                    |
| N | B0BS44 | DR | leucine biosynthetic process                                                                                                                        |
| N | B0BS44 | DR | metal ion binding                                                                                                                                   |
| N | B0BSV5 | CC | One of the primary rRNA binding proteins, it binds directly to 16S rRNA where it nucleates assembly of the body of the 30S subunit (By similarity). |
| N | B0BSV5 | DE | 30S ribosomal protein S4;                                                                                                                           |
| N | B0BSV5 | DR | structural constituent of ribosome                                                                                                                  |
| N | B0BX63 | CC | An accessory protein needed during the final step in the assembly of 30S ribosomal subunit, possibly for assembly of the head region                |
| N | B0BX63 | CC | Essential for efficient processing of 16S rRNA                                                                                                      |
| N | B0BX63 | CC | It has affinity for free ribosomal 30S subunits but not for 70S ribosomes (By similarity).                                                          |
| N | B0BX63 | CC | May be needed both before and after rbfA during the maturation of 16S rRNA                                                                          |
| N | B0BX63 | CC | Probably interacts with S19                                                                                                                         |
| N | B0BX63 | DE | Ribosome maturation factor rimM;                                                                                                                    |
| N | B0BX63 | DR | rRNA processing                                                                                                                                     |
| N | B0BX63 | DR | ribosome binding                                                                                                                                    |
| N | B0C3M8 | CC | May be involved in photosynthetic membrane biogenesis (By similarity).                                                                              |
| N | B0C3M8 | DE | Protein thf1;                                                                                                                                       |
| N | B0C3M8 | DR | thylakoid membrane organization                                                                                                                     |
| N | B0C7G7 | DE | D-fructose-1,6-bisphosphate 1-phosphohydrolase class 1 2;                                                                                           |
| N | B0C7G7 | DE | FBPase class 1 2;                                                                                                                                   |
| N | B0C7G7 | DE | Fructose-1,6-bisphosphatase class 1 2;                                                                                                              |
| N | B0C7G7 | DR | fructose 1,6-bisphosphate 1-phosphatase activity                                                                                                    |
| N | B0C7G7 | DR | metal ion binding                                                                                                                                   |
| N | B0C7G7 | DR | reductive pentose-phosphate cycle                                                                                                                   |
| N | B0CBC7 | CC | Catalyzes the ATP-dependent amination of UTP to CTP with either L-glutamine or ammonia as the source of nitrogen (By similarity).                   |
| N | B0CBC7 | DE | CTP synthase;                                                                                                                                       |
| N | B0CBC7 | DE | CTP synthetase;                                                                                                                                     |
| N | B0CBC7 | DE | UTP--ammonia ligase;                                                                                                                                |
| N | B0CBC7 | DR | CTP synthase activity                                                                                                                               |
| N | B0CBC7 | DR | glutamine metabolic process                                                                                                                         |
| N | B0CBC7 | DR | pyrimidine nucleotide biosynthetic process                                                                                                          |
| N | B0CE03 | CC | Carrier of the growing fatty acid chain in fatty acid biosynthesis (By similarity).                                                                 |
| N | B0CE03 | DE | Acyl carrier protein;                                                                                                                               |
| N | B0CE03 | DR | acyl carrier activity                                                                                                                               |
| N | B0CE03 | DR | cofactor binding                                                                                                                                    |
| N | B0CE03 | DR | fatty acid biosynthetic process                                                                                                                     |
| N | B0CEZ5 | DE | Argininosuccinate lyase;                                                                                                                            |
| N | B0CEZ5 | DE | Arginosuccinase;                                                                                                                                    |
| N | B0CEZ5 | DR | arginine biosynthetic process via ornithine                                                                                                         |
| N | B0CEZ5 | DR | argininosuccinate lyase activity                                                                                                                    |
| N | B0CG09 | CC | Involved in light-induced Na(+)-dependent proton extrusion                                                                                          |
| N | B0CG09 | CC | Also seems to be involved in CO(2) transport (By similarity).                                                                                       |
| N | B0CG09 | DE | Proton extrusion protein PcxA;                                                                                                                      |

|   |        |    |                                                                                                                                                                                                                                                                                                                                                                   |
|---|--------|----|-------------------------------------------------------------------------------------------------------------------------------------------------------------------------------------------------------------------------------------------------------------------------------------------------------------------------------------------------------------------|
| N | B0CG09 | DR | proton transport                                                                                                                                                                                                                                                                                                                                                  |
| N | B0CJD1 | CC | Catalyzes the specific phosphorylation of the 3-hydroxyl group of shikimic acid using ATP as a cosubstrate (By similarity).                                                                                                                                                                                                                                       |
| N | B0CJD1 | DE | Shikimate kinase;                                                                                                                                                                                                                                                                                                                                                 |
| N | B0CJD1 | DR | aromatic amino acid family biosynthetic process                                                                                                                                                                                                                                                                                                                   |
| N | B0CJD1 | DR | metal ion binding                                                                                                                                                                                                                                                                                                                                                 |
| N | B0CJD1 | DR | shikimate kinase activity                                                                                                                                                                                                                                                                                                                                         |
| N | B0JSE3 | CC | With S4 and S5 plays an important role in translational accuracy (By similarity).                                                                                                                                                                                                                                                                                 |
| N | B0JSE3 | DE | 30S ribosomal protein S12;                                                                                                                                                                                                                                                                                                                                        |
| N | B0JSE3 | DR | structural constituent of ribosome                                                                                                                                                                                                                                                                                                                                |
| N | B0JUA2 | DE | UDP-3-O-[3-hydroxymyristoyl] glucosamine N-acyltransferase;                                                                                                                                                                                                                                                                                                       |
| N | B0JUA2 | DR | acyltransferase activity                                                                                                                                                                                                                                                                                                                                          |
| N | B0JUA2 | DR | lipid A biosynthetic process                                                                                                                                                                                                                                                                                                                                      |
| N | B0JWQ2 | DE | 5-enolpyruvylshikimate-3-phosphate phospholyase;                                                                                                                                                                                                                                                                                                                  |
| N | B0JWQ2 | DE | Chorismate synthase;                                                                                                                                                                                                                                                                                                                                              |
| N | B0JWQ2 | DR | aromatic amino acid family biosynthetic process                                                                                                                                                                                                                                                                                                                   |
| N | B0JWQ2 | DR | chorismate synthase activity                                                                                                                                                                                                                                                                                                                                      |
| N | B0K0Y0 | DE | Acetohydroxy-acid isomeroreductase;                                                                                                                                                                                                                                                                                                                               |
| N | B0K0Y0 | DE | Alpha-keto-beta-hydroxylacil reductoisomerase;                                                                                                                                                                                                                                                                                                                    |
| N | B0K0Y0 | DE | Ketol-acid reductoisomerase;                                                                                                                                                                                                                                                                                                                                      |
| N | B0K0Y0 | DR | branched chain family amino acid biosynthetic process                                                                                                                                                                                                                                                                                                             |
| N | B0K0Y0 | DR | coenzyme binding                                                                                                                                                                                                                                                                                                                                                  |
| N | B0K0Y0 | DR | ketol-acid reductoisomerase activity                                                                                                                                                                                                                                                                                                                              |
| N | B0K0Y0 | DR | oxidation-reduction process                                                                                                                                                                                                                                                                                                                                       |
| N | B0K365 | CC | Catalyzes the reversible reaction in which hydroxymethyl group from 5,10-methylenetetrahydrofolate is transferred onto alpha-ketoisovalerate to form ketopantoate (By similarity).                                                                                                                                                                                |
| N | B0K365 | DE | 3-methyl-2-oxobutanoate hydroxymethyltransferase;                                                                                                                                                                                                                                                                                                                 |
| N | B0K365 | DE | Ketopantoate hydroxymethyltransferase;                                                                                                                                                                                                                                                                                                                            |
| N | B0K365 | DR | 3-methyl-2-oxobutanoate hydroxymethyltransferase activity                                                                                                                                                                                                                                                                                                         |
| N | B0K365 | DR | metal ion binding                                                                                                                                                                                                                                                                                                                                                 |
| N | B0K365 | DR | methyltransferase activity                                                                                                                                                                                                                                                                                                                                        |
| N | B0K365 | DR | pantothenate biosynthetic process                                                                                                                                                                                                                                                                                                                                 |
| N | B0K414 | CC | An essential GTPase which binds GTP, GDP and possibly (p)ppGpp with moderate affinity, with high nucleotide exchange rates and a fairly low GTP hydrolysis rate (By similarity)<br>it may play a role in control of the cell cycle, stress response, ribosome biogenesis and in those bacteria that undergo differentiation, in morphogenesis control (Potential) |
| N | B0K414 | CC | GTP-binding protein obg;                                                                                                                                                                                                                                                                                                                                          |
| N | B0K414 | DE | GTPase activity                                                                                                                                                                                                                                                                                                                                                   |
| N | B0K414 | DR | magnesium ion binding                                                                                                                                                                                                                                                                                                                                             |
| N | B0K414 | DR |                                                                                                                                                                                                                                                                                                                                                                   |
| N | B0KCI9 | CC | Binds directly to 23S rRNA                                                                                                                                                                                                                                                                                                                                        |
| N | B0KCI9 | CC | The L1 stalk is quite mobile in the ribosome, and is involved in E site tRNA release (By similarity).                                                                                                                                                                                                                                                             |
| N | B0KCI9 | DE | 50S ribosomal protein L1;                                                                                                                                                                                                                                                                                                                                         |
| N | B0KCI9 | DR | RNA processing                                                                                                                                                                                                                                                                                                                                                    |
| N | B0KCI9 | DR | regulation of translation                                                                                                                                                                                                                                                                                                                                         |
| N | B0KCI9 | DR | structural constituent of ribosome                                                                                                                                                                                                                                                                                                                                |
| N | B0KLP4 | DE | UPF0502 protein PputGB1_3531;                                                                                                                                                                                                                                                                                                                                     |
| N | B0KN58 | CC | Catalyzes the rearrangement of 1-deoxy-D-xylulose 5- phosphate (DXP) to produce the thiazole phosphate moiety of thiamine                                                                                                                                                                                                                                         |
| N | B0KN58 | CC | In vitro, sulfur can be provided by H(2)S (By similarity).                                                                                                                                                                                                                                                                                                        |
| N | B0KN58 | CC | Sulfur is provided by the thiocarboxylate moiety of the carrier protein ThiS                                                                                                                                                                                                                                                                                      |
| N | B0KN58 | DE | Thiazole synthase;                                                                                                                                                                                                                                                                                                                                                |
| N | B0KN58 | DR | lyase activity                                                                                                                                                                                                                                                                                                                                                    |
| N | B0KN58 | DR | thiamine biosynthetic process                                                                                                                                                                                                                                                                                                                                     |
| N | B0KNF5 | CC | Catalyzes the ferrous insertion into protoporphyrin IX (By similarity).                                                                                                                                                                                                                                                                                           |
| N | B0KNF5 | DE | Ferrochelatase;                                                                                                                                                                                                                                                                                                                                                   |
| N | B0KNF5 | DE | Heme synthase;                                                                                                                                                                                                                                                                                                                                                    |
| N | B0KNF5 | DE | Protoheme ferro-lyase;                                                                                                                                                                                                                                                                                                                                            |
| N | B0KNF5 | DR | ferrochelatase activity                                                                                                                                                                                                                                                                                                                                           |
| N | B0KNF5 | DR | heme biosynthetic process                                                                                                                                                                                                                                                                                                                                         |
| N | B0KNF5 | DR | metal ion binding                                                                                                                                                                                                                                                                                                                                                 |



|   |        |    |                                                                                                                                                                                                                                              |
|---|--------|----|----------------------------------------------------------------------------------------------------------------------------------------------------------------------------------------------------------------------------------------------|
| N | B0KR91 | CC | Catalyzes the reversible phosphatidyl group transfer from one phosphatidylglycerol molecule to another to form cardiolipin (CL) (diphosphatidylglycerol) and glycerol (By similarity).                                                       |
| N | B0KR91 | DE | CL synthase;                                                                                                                                                                                                                                 |
| N | B0KR91 | DE | Cardiolipin synthase;                                                                                                                                                                                                                        |
| N | B0KR91 | DR | phospholipid biosynthetic process                                                                                                                                                                                                            |
| N | B0KR91 | DR | phosphotransferase activity, for other substituted phosphate groups                                                                                                                                                                          |
| N | B0KZ79 | DE | Conotoxin Ec15a;                                                                                                                                                                                                                             |
| N | B0KZ79 | DR | ion channel inhibitor activity                                                                                                                                                                                                               |
| N | B0RNH1 | CC | Provides the cells with the ability to utilize trehalose at high osmolarity by splitting it into glucose molecules that can subsequently be taken up by the phosphotransferase-mediated uptake system (By similarity).                       |
| N | B0RNH1 | DE | Alpha,alpha-trehalase;                                                                                                                                                                                                                       |
| N | B0RNH1 | DE | Alpha,alpha-trehalose glucohydrolase;                                                                                                                                                                                                        |
| N | B0RNH1 | DE | Periplasmic trehalase;                                                                                                                                                                                                                       |
| N | B0RNH1 | DR | alpha,alpha-trehalase activity                                                                                                                                                                                                               |
| N | B0RNH1 | DR | trehalose metabolic process                                                                                                                                                                                                                  |
| N | B0RPG5 | CC | Reduction of activated sulfate into sulfite (By similarity).                                                                                                                                                                                 |
| N | B0RPG5 | DE | 3'-phosphoadenylylsulfate reductase;                                                                                                                                                                                                         |
| N | B0RPG5 | DE | PAPS reductase, thioredoxin dependent;                                                                                                                                                                                                       |
| N | B0RPG5 | DE | PAPS sulfotransferase;                                                                                                                                                                                                                       |
| N | B0RPG5 | DE | PAdoPS reductase;                                                                                                                                                                                                                            |
| N | B0RPG5 | DE | Phosphoadenosine phosphosulfate reductase;                                                                                                                                                                                                   |
| N | B0RPG5 | DR | cysteine biosynthetic process                                                                                                                                                                                                                |
| N | B0RPG5 | DR | phosphoadenylyl-sulfate reductase (thioredoxin) activity                                                                                                                                                                                     |
| N | B0RPG5 | DR | sulfate assimilation, phosphoadenylyl sulfate reduction by phosphoadenylyl-sulfate reductase (thioredoxin)                                                                                                                                   |
| N | B0RTD8 | CC | Together with moaA, is involved in the conversion of a guanosine derivative (5'-GTP) into molybdopterin precursor Z (By similarity).                                                                                                         |
| N | B0RTD8 | DE | Molybdenum cofactor biosynthesis protein C;                                                                                                                                                                                                  |
| N | B0RTD8 | DR | Mo-molybdopterin cofactor biosynthetic process                                                                                                                                                                                               |
| N | B0S0R2 | DE | AIR synthase;                                                                                                                                                                                                                                |
| N | B0S0R2 | DE | Phosphoribosyl-aminoimidazole synthetase;                                                                                                                                                                                                    |
| N | B0S0R2 | DE | Phosphoribosylformylglycinamide cyclo-ligase;                                                                                                                                                                                                |
| N | B0S0R2 | DR | 'de novo' IMP biosynthetic process                                                                                                                                                                                                           |
| N | B0S0R2 | DR | phosphoribosylformylglycinamide cyclo-ligase activity                                                                                                                                                                                        |
| N | B0S104 | CC | Catalyzes the attachment of alanine to tRNA(Ala) in a two-step reaction: alanine is first activated by ATP to form Ala- AMP and then transferred to the acceptor end of tRNA(Ala)                                                            |
| N | B0S104 | CC | Also edits incorrectly charged Ser-tRNA(Ala) and Gly-tRNA(Ala) via its editing domain (By similarity).                                                                                                                                       |
| N | B0S104 | DE | Alanine--tRNA ligase;                                                                                                                                                                                                                        |
| N | B0S104 | DE | Alanyl-tRNA synthetase;                                                                                                                                                                                                                      |
| N | B0S104 | DR | alanine-tRNA ligase activity                                                                                                                                                                                                                 |
| N | B0S104 | DR | alanyl-tRNA aminoacylation                                                                                                                                                                                                                   |
| N | B0S104 | DR | metal ion binding                                                                                                                                                                                                                            |
| N | B0S1C3 | CC | Catalyzes the transfer of a dimethylallyl group onto the adenine at position 37 in tRNAs that read codons beginning with uridine, leading to the formation of N6-(dimethylallyl)adenosine (i(6)A) (By similarity).                           |
| N | B0S1C3 | DE | DMAPP:tRNA dimethylallyltransferase;                                                                                                                                                                                                         |
| N | B0S1C3 | DE | Dimethylallyl diphosphate:tRNA dimethylallyltransferase;                                                                                                                                                                                     |
| N | B0S1C3 | DE | IPP transferase;                                                                                                                                                                                                                             |
| N | B0S1C3 | DE | Isopentenyl-diphosphate:tRNA isopentenyltransferase;                                                                                                                                                                                         |
| N | B0S1C3 | DE | tRNA dimethylallyltransferase;                                                                                                                                                                                                               |
| N | B0S1C3 | DR | tRNA dimethylallyltransferase activity                                                                                                                                                                                                       |
| N | B0S1C3 | DR | tRNA processing                                                                                                                                                                                                                              |
| N | B0S1D8 | CC | This enzyme is involved in nucleotide metabolism: it produces dUMP, the immediate precursor of thymidine nucleotides and it decreases the intracellular concentration of dUTP so that uracil cannot be incorporated into DNA (By similarity) |
| N | B0S1D8 | DE | Deoxyuridine 5'-triphosphate nucleotidohydrolase;                                                                                                                                                                                            |
| N | B0S1D8 | DE | dUTP pyrophosphatase;                                                                                                                                                                                                                        |
| N | B0S1D8 | DR | dUTP diphosphatase activity                                                                                                                                                                                                                  |
| N | B0S1D8 | DR | dUTP metabolic process                                                                                                                                                                                                                       |
| N | B0S1D8 | DR | metal ion binding                                                                                                                                                                                                                            |
| N | B0SB35 | DE | Aspartate--tRNA ligase;                                                                                                                                                                                                                      |

|   |        |    |                                                                                                                                                                                                                 |
|---|--------|----|-----------------------------------------------------------------------------------------------------------------------------------------------------------------------------------------------------------------|
| N | B0SB35 | DE | Aspartyl-tRNA synthetase;                                                                                                                                                                                       |
| N | B0SB35 | DR | aspartate-tRNA ligase activity                                                                                                                                                                                  |
| N | B0SB35 | DR | aspartyl-tRNA aminoacylation                                                                                                                                                                                    |
| N | B0SB35 | DR | nucleic acid binding                                                                                                                                                                                            |
| N | B0SHL8 | CC | Catalyzes the isomerization of sedoheptulose 7-phosphate in D-glycero-D-manno-heptose 7-phosphate (By similarity).                                                                                              |
| N | B0SHL8 | DE | Phosphoheptose isomerase;                                                                                                                                                                                       |
| N | B0SHL8 | DE | Sedoheptulose 7-phosphate isomerase;                                                                                                                                                                            |
| N | B0SHL8 | DR | D-sedoheptulose 7-phosphate isomerase activity                                                                                                                                                                  |
| N | B0SHL8 | DR | carbohydrate metabolic process                                                                                                                                                                                  |
| N | B0SHL8 | DR | metal ion binding                                                                                                                                                                                               |
| N | B0SHL8 | DR | sugar binding                                                                                                                                                                                                   |
| N | B0SRX6 | DE | GTP cyclohydrolase 1;                                                                                                                                                                                           |
| N | B0SRX6 | DE | GTP cyclohydrolase I;                                                                                                                                                                                           |
| N | B0SRX6 | DR | GTP cyclohydrolase I activity                                                                                                                                                                                   |
| N | B0SRX6 | DR | metal ion binding                                                                                                                                                                                               |
| N | B0SRX6 | DR | one-carbon metabolic process                                                                                                                                                                                    |
| N | B0SRX6 | DR | tetrahydrofolate biosynthetic process                                                                                                                                                                           |
| N | B0SSH1 | CC | Binds the lower part of the 30S subunit head                                                                                                                                                                    |
| N | B0SSH1 | CC | Binds mRNA in the 70S ribosome, positioning it for translation (By similarity).                                                                                                                                 |
| N | B0SSH1 | DE | 30S ribosomal protein S3;                                                                                                                                                                                       |
| N | B0SSH1 | DR | structural constituent of ribosome                                                                                                                                                                              |
| N | B0SUP8 | CC | DNA-dependent RNA polymerase catalyzes the transcription of DNA into RNA using the four ribonucleoside triphosphates as substrates (By similarity).                                                             |
| N | B0SUP8 | DE | DNA-directed RNA polymerase subunit beta';                                                                                                                                                                      |
| N | B0SUP8 | DE | RNA polymerase subunit beta';                                                                                                                                                                                   |
| N | B0SUP8 | DE | RNAP subunit beta';                                                                                                                                                                                             |
| N | B0SUP8 | DE | Transcriptase subunit beta';                                                                                                                                                                                    |
| N | B0SUP8 | DR | DNA-directed RNA polymerase activity                                                                                                                                                                            |
| N | B0SZS9 | CC | Catalyzes the decarboxylative condensation of pimeloyl- CoA and L-alanine to produce 8-amino-7-oxononanoate (AON), coenzyme A and/or converts 2-amino-3-ketobutyrate to glycine and acetyl-CoA (By similarity). |
| N | B0SZS9 | DE | 7-KAP synthase;                                                                                                                                                                                                 |
| N | B0SZS9 | DE | 7-keto-8-amino-pelargonic acid synthase;                                                                                                                                                                        |
| N | B0SZS9 | DE | 8-amino-7-ketopelargonate synthase;                                                                                                                                                                             |
| N | B0SZS9 | DE | AONS/AKB ligase;                                                                                                                                                                                                |
| N | B0SZS9 | DE | Alpha-oxoamine synthase;                                                                                                                                                                                        |
| N | B0SZS9 | DE | KAPA synthase;                                                                                                                                                                                                  |
| N | B0SZS9 | DE | L-alanine--pimeloyl-CoA ligase;                                                                                                                                                                                 |
| N | B0SZS9 | DE | putative 8-amino-7-oxononanoate synthase/2-amino-3-ketobutyrate coenzyme A                                                                                                                                      |
| N | B0SZS9 | DR | 8-amino-7-oxononanoate synthase activity                                                                                                                                                                        |
| N | B0SZS9 | DR | biotin biosynthetic process                                                                                                                                                                                     |
| N | B0SZS9 | DR | glycine C-acetyltransferase activity                                                                                                                                                                            |
| N | B0SZS9 | DR | pyridoxal phosphate binding                                                                                                                                                                                     |
| N | B0SZS9 | DR | transferase activity, transferring nitrogenous groups                                                                                                                                                           |
| N | B0T1T3 | DE | UPF0133 protein Caul_4574;                                                                                                                                                                                      |
| N | B0TEK0 | CC | Regulates arginine biosynthesis genes (By similarity).                                                                                                                                                          |
| N | B0TEK0 | DE | Arginine repressor;                                                                                                                                                                                             |
| N | B0TEK0 | DR | arginine biosynthetic process                                                                                                                                                                                   |
| N | B0TEK0 | DR | regulation of transcription, DNA-dependent                                                                                                                                                                      |
| N | B0TEK0 | DR | sequence-specific DNA binding transcription factor activity                                                                                                                                                     |
| N | B0TI63 | CC | Catalyzes the conversion of uracil and 5-phospho-alpha- D-ribose 1-diphosphate (PRPP) to UMP and diphosphate (By similarity).                                                                                   |
| N | B0TI63 | DE | UMP pyrophosphorylase;                                                                                                                                                                                          |
| N | B0TI63 | DE | Uracil phosphoribosyltransferase;                                                                                                                                                                               |
| N | B0TI63 | DR | nucleoside metabolic process                                                                                                                                                                                    |
| N | B0TI63 | DR | uracil phosphoribosyltransferase activity                                                                                                                                                                       |
| N | B0TI63 | DR | uracil salvage                                                                                                                                                                                                  |
| N | B0TQH2 | DE | UPF0161 protein Shal_4312;                                                                                                                                                                                      |
| N | B0TR47 | CC | Catalyzes the reversible adenylation of nicotinate mononucleotide (NaMN) to nicotinic acid adenine dinucleotide (NaAD) (By similarity).                                                                         |
| N | B0TR47 | DE | Deamido-NAD(+) diphosphorylase;                                                                                                                                                                                 |
| N | B0TR47 | DE | Deamido-NAD(+) pyrophosphorylase;                                                                                                                                                                               |
| N | B0TR47 | DE | NaMN adenylyltransferase;                                                                                                                                                                                       |
| N | B0TR47 | DE | Nicotinate mononucleotide adenylyltransferase;                                                                                                                                                                  |

|   |        |    |                                                                                                                                                                                                                    |
|---|--------|----|--------------------------------------------------------------------------------------------------------------------------------------------------------------------------------------------------------------------|
| N | B0TR47 | DE | Probable nicotinate-nucleotide adenylyltransferase;                                                                                                                                                                |
| N | B0TR47 | DR | NAD biosynthetic process                                                                                                                                                                                           |
| N | B0TR47 | DR | nicotinate-nucleotide adenylyltransferase activity                                                                                                                                                                 |
| N | B0TYH9 | CC | Ligates lysine onto the cytidine present at position 34 of the AUA codon-specific tRNA(Ile) that contains the anticodon CAU, in an ATP-dependent manner                                                            |
| N | B0TYH9 | CC | Cytidine is converted to lysidine, thus changing the amino acid specificity of the tRNA from methionine to isoleucine (By similarity).                                                                             |
| N | B0TYH9 | DE | tRNA(Ile)-2-lysyl-cytidine synthase;                                                                                                                                                                               |
| N | B0TYH9 | DE | tRNA(Ile)-lysidine synthase;                                                                                                                                                                                       |
| N | B0TYH9 | DE | tRNA(Ile)-lysidine synthetase;                                                                                                                                                                                     |
| N | B0TYH9 | DR | ligase activity, forming carbon-nitrogen bonds                                                                                                                                                                     |
| N | B0TYH9 | DR | tRNA processing                                                                                                                                                                                                    |
| N | B0TYI2 | CC | Transfers the N-acyl diglyceride group on what will become the N-terminal cysteine of membrane lipoproteins (By similarity).                                                                                       |
| N | B0TYI2 | DE | Prolipoprotein diacylglyceryl transferase;                                                                                                                                                                         |
| N | B0TYI2 | DR | lipoprotein biosynthetic process                                                                                                                                                                                   |
| N | B0TYI2 | DR | protein lipoylation                                                                                                                                                                                                |
| N | B0TYI2 | DR | transferase activity, transferring glycosyl groups                                                                                                                                                                 |
| N | B0U083 | CC | Specifically methylates position 2 of adenine 2503 in 23S rRNA (By similarity).                                                                                                                                    |
| N | B0U083 | DE | 23S rRNA m2A2503 methyltransferase;                                                                                                                                                                                |
| N | B0U083 | DE | Ribosomal RNA large subunit methyltransferase N;                                                                                                                                                                   |
| N | B0U083 | DR | 4 iron, 4 sulfur cluster binding                                                                                                                                                                                   |
| N | B0U083 | DR | RNA methyltransferase activity                                                                                                                                                                                     |
| N | B0U083 | DR | metal ion binding                                                                                                                                                                                                  |
| N | B0U083 | DR | rRNA processing                                                                                                                                                                                                    |
| N | B0U1E8 | CC | Catalyzes the transfer of a dimethylallyl group onto the adenine at position 37 in tRNAs that read codons beginning with uridine, leading to the formation of N6-(dimethylallyl)adenosine (i(6)A) (By similarity). |
| N | B0U1E8 | DE | DMAPP:tRNA dimethylallyltransferase;                                                                                                                                                                               |
| N | B0U1E8 | DE | Dimethylallyl diphosphate:tRNA dimethylallyltransferase;                                                                                                                                                           |
| N | B0U1E8 | DE | IPP transferase;                                                                                                                                                                                                   |
| N | B0U1E8 | DE | Isopentenyl-diphosphate:tRNA isopentenyltransferase;                                                                                                                                                               |
| N | B0U1E8 | DE | tRNA dimethylallyltransferase;                                                                                                                                                                                     |
| N | B0U1E8 | DR | tRNA dimethylallyltransferase activity                                                                                                                                                                             |
| N | B0U1E8 | DR | tRNA processing                                                                                                                                                                                                    |
| N | B0U1Z0 | CC | Responsible for the transport of dicarboxylates such as succinate, fumarate, and malate from the periplasm across the membrane (By similarity).                                                                    |
| N | B0U1Z0 | DE | C4-dicarboxylate transport protein;                                                                                                                                                                                |
| N | B0U1Z0 | DR | carbohydrate transport                                                                                                                                                                                             |
| N | B0U1Z0 | DR | sodium:dicarboxylate symporter activity                                                                                                                                                                            |
| N | B0U3Q8 | CC | This protein specifically catalyzes the removal of signal peptides from prolipoproteins (By similarity).                                                                                                           |
| N | B0U3Q8 | DE | Lipoprotein signal peptidase;                                                                                                                                                                                      |
| N | B0U3Q8 | DE | Prolipoprotein signal peptidase;                                                                                                                                                                                   |
| N | B0U3Q8 | DE | Signal peptidase II;                                                                                                                                                                                               |
| N | B0U3Q8 | DR | aspartic-type endopeptidase activity                                                                                                                                                                               |
| N | B0U6Q7 | CC | Catalyzes the 2-thiolation of uridine at the wobble position (U34) of tRNA, leading to the formation of s(2)U34 (By similarity).                                                                                   |
| N | B0U6Q7 | DE | tRNA-specific 2-thiouridylase mnmA;                                                                                                                                                                                |
| N | B0U6Q7 | DR | tRNA processing                                                                                                                                                                                                    |
| N | B0U6Q7 | DR | transferase activity                                                                                                                                                                                               |
| N | B0UE10 | CC | May be involved in the transport of PQQ or its precursor to the periplasm (By similarity).                                                                                                                         |
| N | B0UE10 | DE | Coenzyme PQQ synthesis protein B;                                                                                                                                                                                  |
| N | B0UE10 | DE | Pyrroloquinoline quinone biosynthesis protein B;                                                                                                                                                                   |
| N | B0UE10 | DR | pyrroloquinoline quinone biosynthetic process                                                                                                                                                                      |
| N | B0UFU2 | DE | Flavoprotein wrbA;                                                                                                                                                                                                 |
| N | B0UFU2 | DR | oxidoreductase activity                                                                                                                                                                                            |
| N | B0UJ71 | CC | May conjugate Arg from its aminoacyl-tRNA to the N- termini of proteins containing an N-terminal aspartate or glutamate (Potential).                                                                               |
| N | B0UJ71 | DE | Arginyltransferase;                                                                                                                                                                                                |
| N | B0UJ71 | DE | Putative arginyl-tRNA--protein transferase;                                                                                                                                                                        |
| N | B0UJ71 | DE | R-transferase;                                                                                                                                                                                                     |
| N | B0UJ71 | DR | acyltransferase activity                                                                                                                                                                                           |
| N | B0UJ71 | DR | arginyltransferase activity                                                                                                                                                                                        |

|   |        |    |                                                                                                                                                                                                                 |
|---|--------|----|-----------------------------------------------------------------------------------------------------------------------------------------------------------------------------------------------------------------|
| N | B0UJ71 | DR | protein arginylation                                                                                                                                                                                            |
| N | B0URM8 | CC | Hydrolyzes diadenosine 5',5'-P1,P4-tetraphosphate to yield ADP (By similarity).                                                                                                                                 |
| N | B0URM8 | DE | Ap4A hydrolase;                                                                                                                                                                                                 |
| N | B0URM8 | DE | Bis(5'-nucleosyl)-tetraphosphatase, symmetrical;                                                                                                                                                                |
| N | B0URM8 | DE | Diadenosine 5',5'''-P1,P4-tetraphosphate pyrophosphohydrolase;                                                                                                                                                  |
| N | B0URM8 | DE | Diadenosine tetraphosphatase;                                                                                                                                                                                   |
| N | B0URM8 | DR | bis(5'-nucleosyl)-tetraphosphatase (symmetrical) activity                                                                                                                                                       |
| N | B0URV9 | CC | Phosphorylation of dTMP to form dTDP in both de novo and salvage pathways of dTTP synthesis (By similarity).                                                                                                    |
| N | B0URV9 | DE | Thymidylate kinase;                                                                                                                                                                                             |
| N | B0URV9 | DE | dTMP kinase;                                                                                                                                                                                                    |
| N | B0URV9 | DR | dTDP biosynthetic process                                                                                                                                                                                       |
| N | B0URV9 | DR | thymidylate kinase activity                                                                                                                                                                                     |
| N | B0USS1 | CC | Digests double-stranded RNA                                                                                                                                                                                     |
| N | B0USS1 | CC | Involved in the processing of ribosomal RNA precursors and of some mRNAs (By similarity).                                                                                                                       |
| N | B0USS1 | DE | Ribonuclease 3;                                                                                                                                                                                                 |
| N | B0USS1 | DE | Ribonuclease III;                                                                                                                                                                                               |
| N | B0USS1 | DR | RNA processing                                                                                                                                                                                                  |
| N | B0USS1 | DR | double-stranded RNA binding                                                                                                                                                                                     |
| N | B0USS1 | DR | rRNA catabolic process                                                                                                                                                                                          |
| N | B0USS1 | DR | ribonuclease III activity                                                                                                                                                                                       |
| N | B0UT85 | CC | Catalyzes the last two steps in the biosynthesis of 5- methylaminomethyl-2-thiouridine (mnm(5)s(2)U) at the wobble position (U34) in tRNA                                                                       |
| N | B0UT85 | CC | Catalyzes the FAD-dependent demodification of cmnm(5)s(2)U34 to nm(5)s(2)U34, followed by the transfer of a methyl group from S-adenosyl-L-methionine to nm(5)s(2)U34, to form mnm(5)s(2)U34 (By similarity).   |
| N | B0UT85 | DE | FAD-dependent cmnm(5)s(2)U34 oxidoreductase;                                                                                                                                                                    |
| N | B0UT85 | DE | tRNA (mnm(5)s(2)U34)-methyltransferase;                                                                                                                                                                         |
| N | B0UT85 | DE | tRNA 5-methylaminomethyl-2-thiouridine biosynthesis bifunctional protein mnmC.                                                                                                                                  |
| N | B0UT85 | DE | tRNA mnm(5)s(2)U biosynthesis bifunctional protein;                                                                                                                                                             |
| N | B0UT85 | DR | oxidation-reduction process                                                                                                                                                                                     |
| N | B0UT85 | DR | oxidoreductase activity, acting on the CH-NH group of donors                                                                                                                                                    |
| N | B0UT85 | DR | tRNA (5-methylaminomethyl-2-thiouridylate)-methyltransferase activity                                                                                                                                           |
| N | B0UUM5 | CC | Specifically methylates the guanosine in position 2445 (m2G2445) of 23S rRNA (By similarity).                                                                                                                   |
| N | B0UUM5 | DE | 23S rRNA m2G2445 methyltransferase;                                                                                                                                                                             |
| N | B0UUM5 | DE | Ribosomal RNA large subunit methyltransferase L;                                                                                                                                                                |
| N | B0UUM5 | DE | rRNA (guanine-N(2)-)-methyltransferase rlmL;                                                                                                                                                                    |
| N | B0UUM5 | DR | rRNA (guanine-N2-)-methyltransferase activity                                                                                                                                                                   |
| N | B0UV22 | DE | Pantothenate kinase;                                                                                                                                                                                            |
| N | B0UV22 | DE | Pantothenic acid kinase;                                                                                                                                                                                        |
| N | B0UV22 | DR | coenzyme A biosynthetic process                                                                                                                                                                                 |
| N | B0UV22 | DR | pantothenate kinase activity                                                                                                                                                                                    |
| N | B0UWR3 | CC | Participates actively in the response to hyperosmotic and heat shock by preventing the aggregation of stress-denatured proteins and by disaggregating proteins, also in an autonomous, dnaK-independent fashion |
| N | B0UWR3 | CC | Also involved, together with dnaK and grpE, in the DNA replication of plasmids through activation of initiation proteins (By similarity).                                                                       |
| N | B0UWR3 | CC | GrpE releases ADP from dnaK; ATP binding to dnaK triggers the release of the substrate protein, thus completing the reaction cycle                                                                              |
| N | B0UWR3 | CC | Several rounds of ATP-dependent interactions between dnaJ, dnaK and grpE are required for fully efficient folding                                                                                               |
| N | B0UWR3 | CC | Unfolded proteins bind initially to dnaJ; upon interaction with the dnaJ-bound protein, dnaK hydrolyzes its bound ATP, resulting in the formation of a stable complex                                           |
| N | B0UWR3 | DE | Chaperone protein dnaJ;                                                                                                                                                                                         |
| N | B0UWR3 | DR | DNA replication                                                                                                                                                                                                 |
| N | B0UWR3 | DR | heat shock protein binding                                                                                                                                                                                      |
| N | B0UWR3 | DR | metal ion binding                                                                                                                                                                                               |
| N | B0UWR3 | DR | protein folding                                                                                                                                                                                                 |
| N | B0UWR3 | DR | response to heat                                                                                                                                                                                                |
| N | B0UWR3 | DR | unfolded protein binding                                                                                                                                                                                        |
| N | B0UZC8 | DE | von Willebrand factor C domain-containing protein 2-like;                                                                                                                                                       |

|   |        |    |                                                                                                                                                                                                                                                     |
|---|--------|----|-----------------------------------------------------------------------------------------------------------------------------------------------------------------------------------------------------------------------------------------------------|
| N | B0V5Q4 | CC | This protein is one of the two subunits of integration host factor, a specific DNA-binding protein that functions in genetic recombination as well as in transcriptional and translational control (By similarity).                                 |
| N | B0V5Q4 | DE | Integration host factor subunit alpha;                                                                                                                                                                                                              |
| N | B0V5Q4 | DR | DNA recombination                                                                                                                                                                                                                                   |
| N | B0V5Q4 | DR | regulation of transcription, DNA-dependent                                                                                                                                                                                                          |
| N | B0V5Q4 | DR | regulation of translation                                                                                                                                                                                                                           |
| N | B0V6V5 | CC | Binds to 23S rRNA                                                                                                                                                                                                                                   |
| N | B0V6V5 | CC | Forms part of two intersubunit bridges in the 70S ribosome (By similarity).                                                                                                                                                                         |
| N | B0V6V5 | DE | 50S ribosomal protein L14;                                                                                                                                                                                                                          |
| N | B0V6V5 | DR | structural constituent of ribosome                                                                                                                                                                                                                  |
| N | B0V732 | CC | Catalyzes a trans-dehydration via an enolate intermediate (By similarity).                                                                                                                                                                          |
| N | B0V732 | DE | 3-dehydroquinase;                                                                                                                                                                                                                                   |
| N | B0V732 | DE | 3-dehydroquinase dehydratase;                                                                                                                                                                                                                       |
| N | B0V732 | DE | Type II DHQase;                                                                                                                                                                                                                                     |
| N | B0V732 | DR | 3-dehydroquinase dehydratase activity                                                                                                                                                                                                               |
| N | B0V732 | DR | aromatic amino acid family biosynthetic process                                                                                                                                                                                                     |
| N | B0V744 | CC | Cell wall formation (By similarity).                                                                                                                                                                                                                |
| N | B0V744 | DE | UDP-N-acetylenolpyruvylglucosamine reductase;                                                                                                                                                                                                       |
| N | B0V744 | DE | UDP-N-acetylmuramate dehydrogenase;                                                                                                                                                                                                                 |
| N | B0V744 | DR | UDP-N-acetylmuramate dehydrogenase activity                                                                                                                                                                                                         |
| N | B0V744 | DR | cell division                                                                                                                                                                                                                                       |
| N | B0V744 | DR | cellular cell wall organization                                                                                                                                                                                                                     |
| N | B0V744 | DR | flavin adenine dinucleotide binding                                                                                                                                                                                                                 |
| N | B0V744 | DR | oxidation-reduction process                                                                                                                                                                                                                         |
| N | B0V744 | DR | peptidoglycan biosynthetic process                                                                                                                                                                                                                  |
| N | B0V744 | DR | regulation of cell shape                                                                                                                                                                                                                            |
| N | B0V9T8 | DE | Allantoate amidohydrolase;                                                                                                                                                                                                                          |
| N | B0V9T8 | DE | Probable allantoicase;                                                                                                                                                                                                                              |
| N | B0V9T8 | DR | allantoicase activity                                                                                                                                                                                                                               |
| N | B0V9T8 | DR | purine base metabolic process                                                                                                                                                                                                                       |
| N | B0VE54 | DE | UPF0301 protein ABAYE3454;                                                                                                                                                                                                                          |
| N | B0VTM2 | CC | Required for accurate and efficient protein synthesis under certain stress conditions                                                                                                                                                               |
| N | B0VTM2 | CC | Back- translocation proceeds from a post-translocation (POST) complex to a pre-translocation (PRE) complex, thus giving elongation factor G a second chance to translocate the tRNAs correctly                                                      |
| N | B0VTM2 | CC | Binds to ribosomes in a GTP-dependent manner (By similarity).                                                                                                                                                                                       |
| N | B0VTM2 | CC | May act as a fidelity factor of the translation reaction, by catalyzing a one-codon backward translocation of tRNAs on improperly translocated ribosomes                                                                                            |
| N | B0VTM2 | DE | Elongation factor 4;                                                                                                                                                                                                                                |
| N | B0VTM2 | DE | Ribosomal back-translocase LepA;                                                                                                                                                                                                                    |
| N | B0VTM2 | DR | GTPase activity                                                                                                                                                                                                                                     |
| N | B0VZR4 | CC | Required for endonucleolytic cleavage during polyadenylation-dependent pre-mRNA 3'-end formation (By similarity).                                                                                                                                   |
| N | B0VZR4 | DE | Protein CLP1 homolog;                                                                                                                                                                                                                               |
| N | B0VZR4 | DR | mRNA processing                                                                                                                                                                                                                                     |
| N | B0W6N3 | CC | Component of the eukaryotic translation initiation factor 3 (eIF-3) complex, which is involved in protein synthesis and, together with other initiation factors, stimulates binding of mRNA and methionyl-tRNAi to the 40S ribosome (By similarity) |
| N | B0W6N3 | DE | Eukaryotic translation initiation factor 3 subunit 10;                                                                                                                                                                                              |
| N | B0W6N3 | DE | Eukaryotic translation initiation factor 3 subunit A;                                                                                                                                                                                               |
| N | B0W6N3 | DR | translation initiation factor activity                                                                                                                                                                                                              |
| N | B0WS18 | DE | Probable cGMP 3',5'-cyclic phosphodiesterase subunit delta;                                                                                                                                                                                         |
| N | B0WS18 | DR | 3',5'-cyclic-nucleotide phosphodiesterase activity                                                                                                                                                                                                  |
| N | B0WS18 | DR | visual perception                                                                                                                                                                                                                                   |
| N | B0XQ15 | CC | Essential component of the cytosolic iron-sulfur (Fe/S) protein assembly machinery                                                                                                                                                                  |
| N | B0XQ15 | CC | Required for the maturation of extramitochondrial Fe/S proteins (By similarity).                                                                                                                                                                    |
| N | B0XQ15 | DE | Probable cytosolic iron-sulfur protein assembly protein 1;                                                                                                                                                                                          |
| N | B0Y081 | CC | Involved in cell death (apoptosis) (By similarity)                                                                                                                                                                                                  |
| N | B0Y081 | CC | Required for the apoptotic-like loss of membrane phospholipid asymmetry at stationary phase and facilitates growth under conditions of endoplasmic reticulum stress                                                                                 |
| N | B0Y081 | DE | Metacaspase-1B;                                                                                                                                                                                                                                     |
| N | B0Y081 | DR | cysteine-type endopeptidase activity                                                                                                                                                                                                                |
| N | B0Y7W2 | CC | Glucosidase involved in the degradation of cellulosic biomass                                                                                                                                                                                       |
| N | B0Y7W2 | CC | Active on lichenan (By similarity).                                                                                                                                                                                                                 |

|   |        |    |                                                                                                                                                                                                                  |
|---|--------|----|------------------------------------------------------------------------------------------------------------------------------------------------------------------------------------------------------------------|
| N | B0Y7W2 | DE | Exo-1,3-beta-glucanase D;                                                                                                                                                                                        |
| N | B0Y7W2 | DE | Probable glucan 1,3-beta-glucosidase D;                                                                                                                                                                          |
| N | B0Y7W2 | DR | cation binding                                                                                                                                                                                                   |
| N | B0Y7W2 | DR | cellular cell wall organization                                                                                                                                                                                  |
| N | B0Y7W2 | DR | glucan exo-1,3-beta-glucosidase activity                                                                                                                                                                         |
| N | B0Y7W2 | DR | polysaccharide catabolic process                                                                                                                                                                                 |
| N | B0Z4P1 | CC | Required for PSII activity (By similarity).                                                                                                                                                                      |
| N | B0Z4P1 | DE | PSII 5 kDa protein;                                                                                                                                                                                              |
| N | B0Z4P1 | DE | Photosystem II reaction center protein L;                                                                                                                                                                        |
| N | B0Z4P1 | DR | photosynthesis                                                                                                                                                                                                   |
| N | B0Z4P6 | CC | May help in the organization of the psaE and psaF subunits (By similarity).                                                                                                                                      |
| N | B0Z4P6 | DE | Photosystem I reaction center subunit IX;                                                                                                                                                                        |
| N | B0Z4P6 | DR | photosynthesis                                                                                                                                                                                                   |
| N | B0Z4U0 | CC | This is one of the two reaction center proteins of photosystem II (By similarity).                                                                                                                               |
| N | B0Z4U0 | DE | 32 kDa thylakoid membrane protein;                                                                                                                                                                               |
| N | B0Z4U0 | DE | Photosystem II protein D1;                                                                                                                                                                                       |
| N | B0Z4U0 | DE | Photosystem Q(B) protein;                                                                                                                                                                                        |
| N | B0Z4U0 | DR | electron transporter, transferring electrons within the cyclic electron transport pathway of photosynthesis activity                                                                                             |
| N | B0Z4U0 | DR | metal ion binding                                                                                                                                                                                                |
| N | B0Z4U0 | DR | photosynthetic electron transport in photosystem II                                                                                                                                                              |
| N | B0Z4U0 | DR | response to herbicide                                                                                                                                                                                            |
| N | B0Z547 | CC | Key component of the proton channel; it plays a direct role in the translocation of protons across the membrane (By similarity).                                                                                 |
| N | B0Z547 | DE | ATP synthase F0 sector subunit a;                                                                                                                                                                                |
| N | B0Z547 | DE | ATP synthase subunit a, chloroplastic;                                                                                                                                                                           |
| N | B0Z547 | DE | F-ATPase subunit IV;                                                                                                                                                                                             |
| N | B0Z547 | DR | ATP synthesis coupled proton transport                                                                                                                                                                           |
| N | B0Z547 | DR | hydrogen ion transmembrane transporter activity                                                                                                                                                                  |
| N | B0Z549 | CC | F(1)F(0) ATP synthase produces ATP from ADP in the presence of a proton or sodium gradient                                                                                                                       |
| N | B0Z549 | CC | During catalysis, ATP synthesis in the catalytic domain of F(1) is coupled via a rotary mechanism of the central stalk subunits to proton translocation (By similarity)                                          |
| N | B0Z549 | CC | F-type ATPases consist of two structural domains, F(1) containing the extramembraneous catalytic core and F(0) containing the membrane proton channel, linked together by a central stalk and a peripheral stalk |
| N | B0Z549 | DE | ATP synthase F(0) sector subunit b;                                                                                                                                                                              |
| N | B0Z549 | DE | ATP synthase subunit b, chloroplastic;                                                                                                                                                                           |
| N | B0Z549 | DE | ATPase subunit I;                                                                                                                                                                                                |
| N | B0Z549 | DR | ATP synthesis coupled proton transport                                                                                                                                                                           |
| N | B0Z549 | DR | hydrogen ion transmembrane transporter activity                                                                                                                                                                  |
| N | B1A933 | CC | Binds 16S rRNA, required for the assembly of 30S particles (By similarity).                                                                                                                                      |
| N | B1A933 | DE | 30S ribosomal protein S14, chloroplastic;                                                                                                                                                                        |
| N | B1A933 | DR | structural constituent of ribosome                                                                                                                                                                               |
| N | B1GYY9 | CC | Regulates the transcription of the pyrimidine nucleotide (pyr) operon in response to exogenous pyrimidines (By similarity).                                                                                      |
| N | B1GYY9 | DE | Bifunctional protein pyrR;                                                                                                                                                                                       |
| N | B1GYY9 | DE | Pyrimidine operon regulatory protein;                                                                                                                                                                            |
| N | B1GYY9 | DE | Uracil phosphoribosyltransferase;                                                                                                                                                                                |
| N | B1GYY9 | DR | nucleoside metabolic process                                                                                                                                                                                     |
| N | B1GYY9 | DR | uracil phosphoribosyltransferase activity                                                                                                                                                                        |
| N | B1GZ70 | DE | D-mannonate hydrolase;                                                                                                                                                                                           |
| N | B1GZ70 | DE | Mannonate dehydratase;                                                                                                                                                                                           |
| N | B1GZ70 | DR | glucuronate catabolic process                                                                                                                                                                                    |
| N | B1GZ70 | DR | mannonate dehydratase activity                                                                                                                                                                                   |
| N | B1H056 | CC | Responsible for the release of ribosomes from messenger RNA at the termination of protein biosynthesis                                                                                                           |
| N | B1H056 | CC | May increase the efficiency of translation by recycling ribosomes from one round of translation to another (By similarity).                                                                                      |
| N | B1H056 | DE | Ribosome-recycling factor;                                                                                                                                                                                       |
| N | B1H056 | DE | Ribosome-releasing factor;                                                                                                                                                                                       |
| N | B1HTK8 | CC | Catalyzes a reversible aldol reaction between acetaldehyde and D-glyceraldehyde 3-phosphate to generate 2-deoxy- D-ribose 5-phosphate (By similarity)                                                            |
| N | B1HTK8 | DE | 2-deoxy-D-ribose 5-phosphate aldolase;                                                                                                                                                                           |
| N | B1HTK8 | DE | Deoxyriboaldolase;                                                                                                                                                                                               |

|   |        |    |                                                                                                                                                                                   |
|---|--------|----|-----------------------------------------------------------------------------------------------------------------------------------------------------------------------------------|
| N | B1HTK8 | DE | Deoxyribose-phosphate aldolase;                                                                                                                                                   |
| N | B1HTK8 | DE | Phosphodeoxyriboaldolase;                                                                                                                                                         |
| N | B1HTK8 | DR | deoxyribonucleotide catabolic process                                                                                                                                             |
| N | B1HTK8 | DR | deoxyribose-phosphate aldolase activity                                                                                                                                           |
| N | B1I1J5 | CC | Binds 23S rRNA and is also seen to make contacts with the A and possibly P site tRNAs (By similarity).                                                                            |
| N | B1I1J5 | DE | 50S ribosomal protein L16;                                                                                                                                                        |
| N | B1I1J5 | DR | structural constituent of ribosome                                                                                                                                                |
| N | B1I383 | DE | Dihydrodipicolinate synthase;                                                                                                                                                     |
| N | B1I383 | DR | diaminopimelate biosynthetic process                                                                                                                                              |
| N | B1I383 | DR | dihydrodipicolinate synthase activity                                                                                                                                             |
| N | B1I3J0 | CC | bidirectionally degrades single-stranded DNA into large acid-insoluble oligonucleotides, which are then degraded further into small acid-soluble oligonucleotides (By similarity) |
| N | B1I3J0 | DE | Exodeoxyribonuclease 7 large subunit;                                                                                                                                             |
| N | B1I3J0 | DE | Exodeoxyribonuclease VII large subunit;                                                                                                                                           |
| N | B1I3J0 | DE | Exonuclease VII large subunit;                                                                                                                                                    |
| N | B1I3J0 | DR | DNA catabolic process                                                                                                                                                             |
| N | B1I3J0 | DR | exodeoxyribonuclease VII activity                                                                                                                                                 |
| N | B1I3J0 | DR | nucleic acid binding                                                                                                                                                              |
| N | B1I3W2 | CC | Catalyzes the ATP-dependent conversion of 7-carboxy-7- deazaguanine (CDG) to 7-cyano-7-deazaguanine (preQ(0)) (By similarity).                                                    |
| N | B1I3W2 | DE | 7-cyano-7-carbaguanine synthase;                                                                                                                                                  |
| N | B1I3W2 | DE | 7-cyano-7-deazaguanine synthase;                                                                                                                                                  |
| N | B1I3W2 | DE | PreQ(0) synthase;                                                                                                                                                                 |
| N | B1I3W2 | DE | Queuosine biosynthesis protein queC;                                                                                                                                              |
| N | B1I3W2 | DR | ligase activity                                                                                                                                                                   |
| N | B1I3W2 | DR | metal ion binding                                                                                                                                                                 |
| N | B1I3W2 | DR | queuosine biosynthetic process                                                                                                                                                    |
| N | B1I544 | CC | Involved in the synthesis of meso-diaminopimelate (m-DAP or DL-DAP), required for both lysine and peptidoglycan biosynthesis                                                      |
| N | B1I544 | CC | Catalyzes the direct conversion of tetrahydrodipicolinate to LL-diaminopimelate, a reaction that requires three enzymes in E.coli (By similarity).                                |
| N | B1I544 | DE | DAP-aminotransferase;                                                                                                                                                             |
| N | B1I544 | DE | LL-DAP-aminotransferase;                                                                                                                                                          |
| N | B1I544 | DE | LL-diaminopimelate aminotransferase;                                                                                                                                              |
| N | B1I544 | DR | L,L-diaminopimelate aminotransferase activity                                                                                                                                     |
| N | B1I544 | DR | biosynthetic process                                                                                                                                                              |
| N | B1I544 | DR | pyridoxal phosphate binding                                                                                                                                                       |
| N | B1I6Q5 | DE | Arginine--tRNA ligase;                                                                                                                                                            |
| N | B1I6Q5 | DE | Arginyl-tRNA synthetase;                                                                                                                                                          |
| N | B1I6Q5 | DR | arginine-tRNA ligase activity                                                                                                                                                     |
| N | B1I6Q5 | DR | arginyl-tRNA aminoacylation                                                                                                                                                       |
| N | B1I843 | CC | required for the formation of a threonylcarbamoyl group on adenosine at position 37 (t(6)A37) in tRNAs that read codons beginning with adenine (By similarity)                    |
| N | B1I843 | DE | Probable tRNA threonylcarbamoyladenosine biosynthesis protein Gcp;                                                                                                                |
| N | B1I843 | DE | t(6)A37 threonylcarbamoyladenosine biosynthesis protein;                                                                                                                          |
| N | B1I843 | DR | metal ion binding                                                                                                                                                                 |
| N | B1I843 | DR | metalloendopeptidase activity                                                                                                                                                     |
| N | B1ICH5 | DE | 5-enolpyruvylshikimate-3-phosphate phospholyase;                                                                                                                                  |
| N | B1ICH5 | DE | Chorismate synthase;                                                                                                                                                              |
| N | B1ICH5 | DR | aromatic amino acid family biosynthetic process                                                                                                                                   |
| N | B1ICH5 | DR | chorismate synthase activity                                                                                                                                                      |
| N | B1IE34 | CC | Produces ATP from ADP in the presence of a proton gradient across the membrane                                                                                                    |
| N | B1IE34 | CC | The catalytic sites are hosted primarily by the beta subunits (By similarity).                                                                                                    |
| N | B1IE34 | DE | ATP synthase F1 sector subunit beta;                                                                                                                                              |
| N | B1IE34 | DE | ATP synthase subunit beta;                                                                                                                                                        |
| N | B1IE34 | DE | F-ATPase subunit beta;                                                                                                                                                            |
| N | B1IE34 | DR | ATP hydrolysis coupled proton transport                                                                                                                                           |
| N | B1IE34 | DR | ATP synthesis coupled proton transport                                                                                                                                            |
| N | B1IE34 | DR | hydrogen ion transporting ATP synthase activity, rotational mechanism                                                                                                             |
| N | B1IE34 | DR | hydrogen-exporting ATPase activity, phosphorylative mechanism                                                                                                                     |
| N | B1IE34 | DR | proton-transporting ATPase activity, rotational mechanism                                                                                                                         |
| N | B1IPI6 | CC | Transforms N(2)-succinylglutamate into succinate and glutamate (By similarity).                                                                                                   |
| N | B1IPI6 | DE | Succinylglutamate desuccinylase;                                                                                                                                                  |
| N | B1IPI6 | DR | arginine catabolic process to glutamate                                                                                                                                           |

|   |        |    |                                                                                                                                                                                                       |
|---|--------|----|-------------------------------------------------------------------------------------------------------------------------------------------------------------------------------------------------------|
| N | B1IPI6 | DR | hydrolase activity, acting on ester bonds                                                                                                                                                             |
| N | B1IPI6 | DR | succinylglutamate desuccinylase activity                                                                                                                                                              |
| N | B1IPI6 | DR | zinc ion binding                                                                                                                                                                                      |
| N | B1IST8 | DE | UPF0283 membrane protein ycjF;                                                                                                                                                                        |
| N | B1IT09 | CC | Catalyzes the isomerization of L-xylulose-5-phosphate to L-ribulose-5-phosphate.                                                                                                                      |
| N | B1IT09 | CC | Is involved in the anaerobic L-ascorbate utilization (By similarity).                                                                                                                                 |
| N | B1IT09 | DE | L-ascorbate utilization protein E;                                                                                                                                                                    |
| N | B1IT09 | DE | L-ribulose-5-phosphate 3-epimerase ulaE;                                                                                                                                                              |
| N | B1IT09 | DE | L-xylulose-5-phosphate 3-epimerase;                                                                                                                                                                   |
| N | B1IT09 | DR | L-ribulose-5-phosphate 3-epimerase activity                                                                                                                                                           |
| N | B1IT09 | DR | carbohydrate metabolic process                                                                                                                                                                        |
| N | B1IT09 | DR | intramolecular oxidoreductase activity, interconverting aldoses and ketoses                                                                                                                           |
| N | B1IT54 | DE | UPF0235 protein yggU;                                                                                                                                                                                 |
| N | B1IUQ4 | CC | Condenses 4-methyl-5-(beta-hydroxyethyl)thiazole monophosphate (THZ-P) and 2-methyl-4-amino-5-hydroxymethyl pyrimidine pyrophosphate (HMP-PP) to form thiamine monophosphate (TMP) (By similarity).   |
| N | B1IUQ4 | DE | TMP pyrophosphorylase;                                                                                                                                                                                |
| N | B1IUQ4 | DE | Thiamine-phosphate pyrophosphorylase;                                                                                                                                                                 |
| N | B1IUQ4 | DE | Thiamine-phosphate synthase;                                                                                                                                                                          |
| N | B1IUQ4 | DR | metal ion binding                                                                                                                                                                                     |
| N | B1IUQ4 | DR | thiamine biosynthetic process                                                                                                                                                                         |
| N | B1IUQ4 | DR | thiamine-phosphate diphosphorylase activity                                                                                                                                                           |
| N | B1IVP8 | CC | Acts as a radical domain for damaged PFL and possibly other radical proteins (By similarity).                                                                                                         |
| N | B1IVP8 | DE | Autonomous glycyl radical cofactor;                                                                                                                                                                   |
| N | B1IVP8 | DR | catalytic activity                                                                                                                                                                                    |
| N | B1IWE3 | CC | Major role in the synthesis of nucleoside triphosphates other than ATP                                                                                                                                |
| N | B1IWE3 | CC | The ATP gamma phosphate is transferred to the NDP beta phosphate via a ping-pong mechanism, using a phosphorylated active-site intermediate (By similarity).                                          |
| N | B1IWE3 | DE | NDP kinase;                                                                                                                                                                                           |
| N | B1IWE3 | DE | Nucleoside diphosphate kinase;                                                                                                                                                                        |
| N | B1IWE3 | DE | Nucleoside-2-P kinase;                                                                                                                                                                                |
| N | B1IWE3 | DR | CTP biosynthetic process                                                                                                                                                                              |
| N | B1IWE3 | DR | GTP biosynthetic process                                                                                                                                                                              |
| N | B1IWE3 | DR | UTP biosynthetic process                                                                                                                                                                              |
| N | B1IWE3 | DR | metal ion binding                                                                                                                                                                                     |
| N | B1IWE3 | DR | nucleoside diphosphate kinase activity                                                                                                                                                                |
| N | B1IWN0 | CC | Catalyzes the attachment of serine to tRNA(Ser)                                                                                                                                                       |
| N | B1IWN0 | CC | Is also able to aminoacylate tRNA(Sec) with serine, to form the misacylated tRNA L-seryl-tRNA(Sec), which will be further converted into selenocysteinyl-tRNA(Sec) (By similarity).                   |
| N | B1IWN0 | DE | Serine--tRNA ligase;                                                                                                                                                                                  |
| N | B1IWN0 | DE | Seryl-tRNA synthetase;                                                                                                                                                                                |
| N | B1IWN0 | DE | Seryl-tRNA(Ser/Sec) synthetase;                                                                                                                                                                       |
| N | B1IWN0 | DR | serine-tRNA ligase activity                                                                                                                                                                           |
| N | B1IWN0 | DR | seryl-tRNA aminoacylation                                                                                                                                                                             |
| N | B1IY62 | DE | Malate dehydrogenase [quinone];                                                                                                                                                                       |
| N | B1IY62 | DE | Probable malate:quinone oxidoreductase;                                                                                                                                                               |
| N | B1IY62 | DR | malate dehydrogenase (menaquinone) activity                                                                                                                                                           |
| N | B1IY62 | DR | malate dehydrogenase (quinone) activity                                                                                                                                                               |
| N | B1IY62 | DR | tricarboxylic acid cycle                                                                                                                                                                              |
| N | B1J1C4 | CC | Catalyzes the oxidation of either pyridoxine 5'-phosphate (PNP) or pyridoxamine 5'-phosphate (PMP) into pyridoxal 5'-phosphate (PLP) (By similarity).                                                 |
| N | B1J1C4 | DE | PNP/PMP oxidase;                                                                                                                                                                                      |
| N | B1J1C4 | DE | Pyridoxal 5'-phosphate synthase;                                                                                                                                                                      |
| N | B1J1C4 | DE | Pyridoxine/pyridoxamine 5'-phosphate oxidase;                                                                                                                                                         |
| N | B1J1C4 | DR | oxidation-reduction process                                                                                                                                                                           |
| N | B1J1C4 | DR | pyridoxamine-phosphate oxidase activity                                                                                                                                                               |
| N | B1J1C4 | DR | pyridoxine biosynthetic process                                                                                                                                                                       |
| N | B1J432 | CC | Modifies the free amino group of the aminoacyl moiety of methionyl-tRNA (Met-tRNA).                                                                                                                   |
| N | B1J432 | CC | The formyl group appears to play a dual role in the initiator identity of N-formylmethionyl-tRNA by: (I) promoting its recognition by IF2 and (II) impairing its binding to EFTu-GTP (By similarity). |
| N | B1J432 | DE | Methionyl-tRNA formyltransferase;                                                                                                                                                                     |
| N | B1J432 | DR | methionyl-tRNA formyltransferase activity                                                                                                                                                             |



|   |        |    |                                                                                                                                                                                                                    |
|---|--------|----|--------------------------------------------------------------------------------------------------------------------------------------------------------------------------------------------------------------------|
| N | B1J432 | DR | methyltransferase activity                                                                                                                                                                                         |
| N | B1J522 | CC | Catalyzes the attachment of glutamate to tRNA(Glu) in a two-step reaction: glutamate is first activated by ATP to form Glu-AMP and then transferred to the acceptor end of tRNA(Glu) (By similarity).              |
| N | B1J522 | DE | Glutamate--tRNA ligase;                                                                                                                                                                                            |
| N | B1J522 | DE | Glutamyl-tRNA synthetase;                                                                                                                                                                                          |
| N | B1J522 | DR | glutamate-tRNA ligase activity                                                                                                                                                                                     |
| N | B1J522 | DR | glutamyl-tRNA aminoacylation                                                                                                                                                                                       |
| N | B1JIK2 | CC | Catalyzes the phosphorylation of methylthioribose into methylthioribose-1-phosphate (By similarity).                                                                                                               |
| N | B1JIK2 | DE | MTR kinase;                                                                                                                                                                                                        |
| N | B1JIK2 | DE | Methylthioribose kinase;                                                                                                                                                                                           |
| N | B1JIK2 | DR | S-methyl-5-thioribose kinase activity                                                                                                                                                                              |
| N | B1JIK2 | DR | methionine biosynthetic process                                                                                                                                                                                    |
| N | B1JIW7 | CC | Binds the lower part of the 30S subunit head                                                                                                                                                                       |
| N | B1JIW7 | CC | Binds mRNA in the 70S ribosome, positioning it for translation (By similarity).                                                                                                                                    |
| N | B1JIW7 | DE | 30S ribosomal protein S3;                                                                                                                                                                                          |
| N | B1JIW7 | DR | structural constituent of ribosome                                                                                                                                                                                 |
| N | B1JL77 | CC | Cell wall formation (By similarity).                                                                                                                                                                               |
| N | B1JL77 | DE | Monofunctional TGase;                                                                                                                                                                                              |
| N | B1JL77 | DE | Monofunctional biosynthetic peptidoglycan transglycosylase;                                                                                                                                                        |
| N | B1JL77 | DR | cellular cell wall organization                                                                                                                                                                                    |
| N | B1JL77 | DR | peptidoglycan biosynthetic process                                                                                                                                                                                 |
| N | B1JL77 | DR | regulation of cell shape                                                                                                                                                                                           |
| N | B1JL77 | DR | transferase activity, transferring pentosyl groups                                                                                                                                                                 |
| N | B1JPH6 | DE | Lysine--tRNA ligase;                                                                                                                                                                                               |
| N | B1JPH6 | DE | Lysyl-tRNA synthetase;                                                                                                                                                                                             |
| N | B1JPH6 | DR | lysine-tRNA ligase activity                                                                                                                                                                                        |
| N | B1JPH6 | DR | lysyl-tRNA aminoacylation                                                                                                                                                                                          |
| N | B1JPH6 | DR | metal ion binding                                                                                                                                                                                                  |
| N | B1JPH6 | DR | nucleic acid binding                                                                                                                                                                                               |
| N | B1JQC1 | CC | Plays a role in lysophospholipid acylation                                                                                                                                                                         |
| N | B1JQC1 | CC | Its physiological function is to regenerate phosphatidylethanolamine from 2-acyl-glycero-3-phosphoethanolamine (2-acyl-GPE) formed by transacylation reactions or degradation by phospholipase A1 (By similarity). |
| N | B1JQC1 | CC | Transfers fatty acids to the 1-position via an enzyme-bound acyl-ACP intermediate in the presence of ATP and magnesium                                                                                             |
| N | B1JQC1 | DE | 2-acyl-GPE acyltransferase;                                                                                                                                                                                        |
| N | B1JQC1 | DE | 2-acylglycerophosphoethanolamine acyltransferase;                                                                                                                                                                  |
| N | B1JQC1 | DE | Acyl-ACP synthetase;                                                                                                                                                                                               |
| N | B1JQC1 | DE | Acyl-[acyl-carrier-protein] synthetase;                                                                                                                                                                            |
| N | B1JQC1 | DE | Acyl-[acyl-carrier-protein]--phospholipid O-acyltransferase;                                                                                                                                                       |
| N | B1JQC1 | DE | Bifunctional protein aas;                                                                                                                                                                                          |
| N | B1JQC1 | DE | Long-chain-fatty-acid--[acyl-carrier-protein] ligase;                                                                                                                                                              |
| N | B1JQC1 | DR | acyl-[acyl-carrier-protein]-phospholipid O-acyltransferase activity                                                                                                                                                |
| N | B1JQC1 | DR | long-chain fatty acid [acyl-carrier-protein] ligase activity                                                                                                                                                       |
| N | B1JQW9 | CC | Reversibly transfers an adenyl group from ATP to 4'-phosphopantetheine, yielding dephospho-CoA (dPCoA) and pyrophosphate (By similarity).                                                                          |
| N | B1JQW9 | DE | Dephospho-CoA pyrophosphorylase;                                                                                                                                                                                   |
| N | B1JQW9 | DE | Pantetheine-phosphate adenyltransferase;                                                                                                                                                                           |
| N | B1JQW9 | DE | Phosphopantetheine adenyltransferase;                                                                                                                                                                              |
| N | B1JQW9 | DR | coenzyme A biosynthetic process                                                                                                                                                                                    |
| N | B1JQW9 | DR | pantetheine-phosphate adenyltransferase activity                                                                                                                                                                   |
| N | B1JRB2 | CC | Acts as a radical domain for damaged PFL and possibly other radical proteins (By similarity).                                                                                                                      |
| N | B1JRB2 | DE | Autonomous glycyl radical cofactor;                                                                                                                                                                                |
| N | B1JRB2 | DR | catalytic activity                                                                                                                                                                                                 |
| N | B1JSR4 | CC | Together with moaA, is involved in the conversion of a guanosine derivative (5'-GTP) into molybdopterin precursor Z (By similarity).                                                                               |
| N | B1JSR4 | DE | Molybdenum cofactor biosynthesis protein C;                                                                                                                                                                        |
| N | B1JSR4 | DR | Mo-molybdopterin cofactor biosynthetic process                                                                                                                                                                     |
| N | B1JU98 | CC | Catalyzes the condensation of ATP and 5-phosphoribose 1- diphosphate to form N'-(5'-phosphoribosyl)-ATP (PR-ATP)                                                                                                   |
| N | B1JU98 | CC | has a crucial role in the pathway because the rate of misuine biosynthesis seems to be controlled primarily by regulation of hisG enzymatic activity (By similarity)                                               |

|   |        |    |                                                                                                                                                                                                       |
|---|--------|----|-------------------------------------------------------------------------------------------------------------------------------------------------------------------------------------------------------|
| N | B1JU98 | DE | ATP phosphoribosyltransferase;                                                                                                                                                                        |
| N | B1JU98 | DE | ATP-PRTase;                                                                                                                                                                                           |
| N | B1JU98 | DR | ATP phosphoribosyltransferase activity                                                                                                                                                                |
| N | B1JU98 | DR | histidine biosynthetic process                                                                                                                                                                        |
| N | B1JUK8 | DE | Cysteine--tRNA ligase;                                                                                                                                                                                |
| N | B1JUK8 | DE | Cysteinyl-tRNA synthetase;                                                                                                                                                                            |
| N | B1JUK8 | DR | cysteine-tRNA ligase activity                                                                                                                                                                         |
| N | B1JUK8 | DR | cysteinyl-tRNA aminoacylation                                                                                                                                                                         |
| N | B1JUK8 | DR | metal ion binding                                                                                                                                                                                     |
| N | B1JZZ7 | CC | Catalyzes the addition and repair of the essential 3'- terminal CCA sequence in tRNAs without using a nucleic acid template                                                                           |
| N | B1JZZ7 | CC | Adds these three nucleotides in the order of C, C, and A to the tRNA nucleotide-73, using CTP and ATP as substrates and producing inorganic pyrophosphate                                             |
| N | B1JZZ7 | CC | Also shows phosphatase, 2'- nucleotidase and 2',3'-cyclic phosphodiesterase activities                                                                                                                |
| N | B1JZZ7 | CC | These phosphohydrolase activities are probably involved in the repair of the tRNA 3'-CCA terminus degraded by intracellular RNases (By similarity).                                                   |
| N | B1JZZ7 | DE | 2',3'-cyclic phosphodiesterase;                                                                                                                                                                       |
| N | B1JZZ7 | DE | 2'-nucleotidase;                                                                                                                                                                                      |
| N | B1JZZ7 | DE | CCA tRNA nucleotidyltransferase;                                                                                                                                                                      |
| N | B1JZZ7 | DE | CCA-adding enzyme;                                                                                                                                                                                    |
| N | B1JZZ7 | DE | Multifunctional CCA protein;                                                                                                                                                                          |
| N | B1JZZ7 | DE | Phosphatase;                                                                                                                                                                                          |
| N | B1JZZ7 | DE | tRNA CCA-pyrophosphorylase;                                                                                                                                                                           |
| N | B1JZZ7 | DE | tRNA adenylyl-/cytidyl-transferase;                                                                                                                                                                   |
| N | B1JZZ7 | DE | tRNA nucleotidyltransferase;                                                                                                                                                                          |
| N | B1JZZ7 | DR | hydrolase activity                                                                                                                                                                                    |
| N | B1JZZ7 | DR | metal ion binding                                                                                                                                                                                     |
| N | B1JZZ7 | DR | tRNA 3'-terminal CCA addition                                                                                                                                                                         |
| N | B1JZZ7 | DR | tRNA adenylyltransferase activity                                                                                                                                                                     |
| N | B1KCW3 | CC | Modifies the free amino group of the aminoacyl moiety of methionyl-tRNA (Met-tRNA)                                                                                                                    |
| N | B1KCW3 | CC | The formyl group appears to play a dual role in the initiator identity of N-formylmethionyl-tRNA by: (I) promoting its recognition by IF2 and (II) impairing its binding to EFTu-GTP (By similarity). |
| N | B1KCW3 | DE | Methionyl-tRNA formyltransferase;                                                                                                                                                                     |
| N | B1KCW3 | DR | methionyl-tRNA formyltransferase activity                                                                                                                                                             |
| N | B1KCW3 | DR | methyltransferase activity                                                                                                                                                                            |
| N | B1KHT1 | DE | Thiopurine S-methyltransferase;                                                                                                                                                                       |
| N | B1KHT1 | DE | Thiopurine methyltransferase;                                                                                                                                                                         |
| N | B1KHT1 | DR | thiopurine S-methyltransferase activity                                                                                                                                                               |
| N | B1KL38 | CC | Involved in base excision repair of DNA damaged by oxidation or by mutagenic agents                                                                                                                   |
| N | B1KL38 | CC | Acts as DNA glycosylase that recognizes and removes damaged bases                                                                                                                                     |
| N | B1KL38 | CC | Cleaves the DNA backbone by beta-delta elimination to generate a single-strand break at the site of the removed base with both 3'- and 5'-phosphates (By similarity)                                  |
| N | B1KL38 | CC | Has AP (apurinic/apyrimidinic) lyase activity and introduces nicks in the DNA                                                                                                                         |
| N | B1KL38 | CC | Has a preference for oxidized purines, such as 7,8-dihydro-8-oxoguanine (8-oxo-dG)                                                                                                                    |
| N | B1KL38 | DE | AP lyase mutM;                                                                                                                                                                                        |
| N | B1KL38 | DE | DNA-(apurinic or apyrimidinic site) lyase mutM;                                                                                                                                                       |
| N | B1KL38 | DE | Fapy-DNA glycosylase;                                                                                                                                                                                 |
| N | B1KL38 | DE | Formamidopyrimidine-DNA glycosylase;                                                                                                                                                                  |
| N | B1KL38 | DR | base-excision repair                                                                                                                                                                                  |
| N | B1KL38 | DR | damaged DNA binding                                                                                                                                                                                   |
| N | B1KL38 | DR | nucleotide-excision repair                                                                                                                                                                            |
| N | B1KL38 | DR | oxidized purine base lesion DNA N-glycosylase activity                                                                                                                                                |
| N | B1KL38 | DR | zinc ion binding                                                                                                                                                                                      |
| N | B1KM58 | CC | Converts heme B (prothemin IX) to heme O by substitution of the vinyl group on carbon 2 of heme B porphyrin ring with a hydroxyethyl farnesyl side group (By similarity)                              |
| N | B1KM58 | DE | Heme B farnesyltransferase 1;                                                                                                                                                                         |
| N | B1KM58 | DE | Heme O synthase 1;                                                                                                                                                                                    |
| N | B1KM58 | DE | Protoheme IX farnesyltransferase 1;                                                                                                                                                                   |
| N | B1KM58 | DR | heme O biosynthetic process                                                                                                                                                                           |
| N | B1KM58 | DR | protoheme IX farnesyltransferase activity                                                                                                                                                             |
| N | B1KNA0 | DE | AICAR transformylase;                                                                                                                                                                                 |
| N | B1KNA0 | DE | Bifunctional purine biosynthesis protein purH;                                                                                                                                                        |
| N | B1KNA0 | DE | IMP cyclohydrolase;                                                                                                                                                                                   |
| N | B1KNA0 | DE | IMP synthase;                                                                                                                                                                                         |

|   |        |    |                                                                                                                                                                    |
|---|--------|----|--------------------------------------------------------------------------------------------------------------------------------------------------------------------|
| N | B1KNA0 | DE | Inosinicae;                                                                                                                                                        |
| N | B1KNA0 | DE | Phosphoribosylaminoimidazolecarboxamide formyltransferase;                                                                                                         |
| N | B1KNA0 | DR | IMP biosynthetic process                                                                                                                                           |
| N | B1KNA0 | DR | IMP cyclohydrolase activity                                                                                                                                        |
| N | B1KNA0 | DR | phosphoribosylaminoimidazolecarboxamide formyltransferase activity                                                                                                 |
| N | B1KTF0 | CC | Cell wall formation (By similarity).                                                                                                                               |
| N | B1KTF0 | DE | UDP-N-acetylmuramate--L-alanine ligase;                                                                                                                            |
| N | B1KTF0 | DE | UDP-N-acetylmuramoyl-L-alanine synthetase;                                                                                                                         |
| N | B1KTF0 | DR | UDP-N-acetylmuramate-L-alanine ligase activity                                                                                                                     |
| N | B1KTF0 | DR | cell division                                                                                                                                                      |
| N | B1KTF0 | DR | cellular cell wall organization                                                                                                                                    |
| N | B1KTF0 | DR | peptidoglycan biosynthetic process                                                                                                                                 |
| N | B1KTF0 | DR | regulation of cell shape                                                                                                                                           |
| N | B1KY93 | DE | Adenosine aminohydrolase;                                                                                                                                          |
| N | B1KY93 | DE | Adenosine deaminase;                                                                                                                                               |
| N | B1KY93 | DR | adenosine deaminase activity                                                                                                                                       |
| N | B1KY93 | DR | metal ion binding                                                                                                                                                  |
| N | B1KY93 | DR | purine ribonucleoside monophosphate biosynthetic process                                                                                                           |
| N | B1KZR4 | DE | 50S ribosomal protein L27;                                                                                                                                         |
| N | B1KZR4 | DR | structural constituent of ribosome                                                                                                                                 |
| N | B1L9U3 | DE | 6-phosphofructokinase;                                                                                                                                             |
| N | B1L9U3 | DE | Phosphofructokinase;                                                                                                                                               |
| N | B1L9U3 | DE | Phosphohexokinase;                                                                                                                                                 |
| N | B1L9U3 | DR | 6-phosphofructokinase activity                                                                                                                                     |
| N | B1L9U3 | DR | fructose 6-phosphate metabolic process                                                                                                                             |
| N | B1L9U3 | DR | metal ion binding                                                                                                                                                  |
| N | B1LBH9 | DE | Aspartate--tRNA ligase;                                                                                                                                            |
| N | B1LBH9 | DE | Aspartyl-tRNA synthetase;                                                                                                                                          |
| N | B1LBH9 | DR | aspartate-tRNA ligase activity                                                                                                                                     |
| N | B1LBH9 | DR | aspartyl-tRNA aminoacylation                                                                                                                                       |
| N | B1LBH9 | DR | nucleic acid binding                                                                                                                                               |
| N | B1LHB9 | CC | This protein binds to the 23S rRNA, and is important in its secondary structure                                                                                    |
| N | B1LHB9 | CC | It is located near the subunit interface in the base of the L7/L12 stalk, and near the tRNA binding site of the peptidyltransferase center (By similarity).        |
| N | B1LHB9 | DE | 50S ribosomal protein L6;                                                                                                                                          |
| N | B1LHB9 | DR | structural constituent of ribosome                                                                                                                                 |
| N | B1LHM1 | CC | Thioesterase that catalyzes the hydrolysis of S-D- lactoyl- glutathione to form glutathione and D-lactic acid (By similarity).                                     |
| N | B1LHM1 | DE | Glyoxalase II;                                                                                                                                                     |
| N | B1LHM1 | DE | Hydroxyacylglutathione hydrolase;                                                                                                                                  |
| N | B1LHM1 | DR | hydroxyacylglutathione hydrolase activity                                                                                                                          |
| N | B1LHM1 | DR | zinc ion binding                                                                                                                                                   |
| N | B1LIY1 | CC | Catalyzes the NADPH-dependent reduction of glyoxylate and hydroxypyruvate into glycolate and glycerate, respectively (By similarity).                              |
| N | B1LIY1 | DE | 2-ketoacid reductase;                                                                                                                                              |
| N | B1LIY1 | DE | Glyoxylate/hydroxypyruvate reductase A;                                                                                                                            |
| N | B1LIY1 | DR | cofactor binding                                                                                                                                                   |
| N | B1LIY1 | DR | glyoxylate reductase (NADP) activity                                                                                                                               |
| N | B1LIY1 | DR | hydroxypyruvate reductase activity                                                                                                                                 |
| N | B1LIY1 | DR | oxidation-reduction process                                                                                                                                        |
| N | B1LM67 | CC | Catalyzes the decarboxylative condensation of pimeloyl- CoA and L-alanine to produce 8-amino-7-oxononanoate (AON), coenzyme A, and carbon dioxide (By similarity). |
| N | B1LM67 | DE | 7-KAP synthase;                                                                                                                                                    |
| N | B1LM67 | DE | 7-keto-8-amino-pelargonic acid synthase;                                                                                                                           |
| N | B1LM67 | DE | 8-amino-7-ketopelargonate synthase;                                                                                                                                |
| N | B1LM67 | DE | 8-amino-7-oxononanoate synthase;                                                                                                                                   |
| N | B1LM67 | DE | KAPA synthase;                                                                                                                                                     |
| N | B1LM67 | DE | L-alanine--pimeloyl-CoA ligase;                                                                                                                                    |
| N | B1LM67 | DR | 8-amino-7-oxononanoate synthase activity                                                                                                                           |
| N | B1LM67 | DR | biotin biosynthetic process                                                                                                                                        |
| N | B1LM67 | DR | pyridoxal phosphate binding                                                                                                                                        |
| N | B1LM67 | DR | transferase activity, transferring nitrogenous groups                                                                                                              |
| N | B1LMD0 | CC | Catalyzes the methylthiolation of an aspartic acid residue of ribosomal protein S12 (By similarity).                                                               |
| N | B1LMD0 | DE | Ribosomal protein S12 methylthiotransferase RimO;                                                                                                                  |

|   |        |    |                                                                                                                                                                                                                                                   |
|---|--------|----|---------------------------------------------------------------------------------------------------------------------------------------------------------------------------------------------------------------------------------------------------|
| N | B1LMD0 | DE | Ribosome maturation factor RimO;                                                                                                                                                                                                                  |
| N | B1LMD0 | DE | S12 MTTase;                                                                                                                                                                                                                                       |
| N | B1LMD0 | DE | S12 methylthiotransferase;                                                                                                                                                                                                                        |
| N | B1LMD0 | DR | 4 iron, 4 sulfur cluster binding                                                                                                                                                                                                                  |
| N | B1LMD0 | DR | RNA modification                                                                                                                                                                                                                                  |
| N | B1LMD0 | DR | metal ion binding                                                                                                                                                                                                                                 |
| N | B1LMD0 | DR | peptidyl-L-beta-methylaminoaspartic acid biosynthetic process from peptidyl-<br>aspartic acid                                                                                                                                                     |
| N | B1LMD0 | DR | transferase activity                                                                                                                                                                                                                              |
| N | B1LNH2 | CC | Specifically methylates position 2 of adenine 2503 in 23S rRNA (By similarity).                                                                                                                                                                   |
| N | B1LNH2 | DE | 23S rRNA m2A2503 methyltransferase;                                                                                                                                                                                                               |
| N | B1LNH2 | DE | Ribosomal RNA large subunit methyltransferase N;                                                                                                                                                                                                  |
| N | B1LNH2 | DR | 4 iron, 4 sulfur cluster binding                                                                                                                                                                                                                  |
| N | B1LNH2 | DR | RNA methyltransferase activity                                                                                                                                                                                                                    |
| N | B1LNH2 | DR | metal ion binding                                                                                                                                                                                                                                 |
| N | B1LNH2 | DR | rRNA processing                                                                                                                                                                                                                                   |
| N | B1LPK8 | CC | Represses a number of genes involved in the response to DNA damage (SOS<br>response), including recA and lexA                                                                                                                                     |
| N | B1LPK8 | CC | Binds to the 16 bp palindromic sequence 5'-CTGTATATATACAG-3'                                                                                                                                                                                      |
| N | B1LPK8 | CC | In the presence of single-stranded DNA, recA interacts with lexA causing an<br>autocatalytic cleavage which disrupts the DNA-binding part of lexA, leading to<br>derepression of the SOS regulon and eventually DNA repair (By similarity).       |
| N | B1LPK8 | DE | LexA repressor;                                                                                                                                                                                                                                   |
| N | B1LPK8 | DR | DNA replication                                                                                                                                                                                                                                   |
| N | B1LPK8 | DR | serine-type endopeptidase activity                                                                                                                                                                                                                |
| N | B1LPS5 | CC | Catalyzes the dehydration of D-galactonate to 2-keto-3- deoxy-D-galactonate<br>(By similarity).                                                                                                                                                   |
| N | B1LPS5 | DE | D-galactonate dehydratase 1;                                                                                                                                                                                                                      |
| N | B1LPS5 | DR | D-galactonate catabolic process                                                                                                                                                                                                                   |
| N | B1LPS5 | DR | cellular amino acid catabolic process                                                                                                                                                                                                             |
| N | B1LPS5 | DR | galactonate dehydratase activity                                                                                                                                                                                                                  |
| N | B1LPS5 | DR | metal ion binding                                                                                                                                                                                                                                 |
| N | B1LQG4 | CC | Prevents misfolding and promotes the refolding and proper assembly of unfolded<br>polypeptides generated under stress conditions (By similarity).                                                                                                 |
| N | B1LQG4 | DE | 60 kDa chaperonin;                                                                                                                                                                                                                                |
| N | B1LQG4 | DE | GroEL protein;                                                                                                                                                                                                                                    |
| N | B1LQG4 | DE | Protein Cpn60;                                                                                                                                                                                                                                    |
| N | B1LQG4 | DR | protein refolding                                                                                                                                                                                                                                 |
| N | B1LWQ5 | CC | Catalyzes the reversible transfer of the terminal phosphate group between ATP<br>and AMP                                                                                                                                                          |
| N | B1LWQ5 | CC | This small ubiquitous enzyme involved in the energy metabolism and nucleotide<br>synthesis, is essential for maintenance and cell growth (By similarity).                                                                                         |
| N | B1LWQ5 | DE | ATP-AMP transphosphorylase;                                                                                                                                                                                                                       |
| N | B1LWQ5 | DE | Adenylate kinase;                                                                                                                                                                                                                                 |
| N | B1LWQ5 | DR | adenylate kinase activity                                                                                                                                                                                                                         |
| N | B1LWQ5 | DR | nucleotide biosynthetic process                                                                                                                                                                                                                   |
| N | B1MY11 | DE | Leucine--tRNA ligase;                                                                                                                                                                                                                             |
| N | B1MY11 | DE | Leucyl-tRNA synthetase;                                                                                                                                                                                                                           |
| N | B1MY11 | DR | leucine-tRNA ligase activity                                                                                                                                                                                                                      |
| N | B1MY11 | DR | leucyl-tRNA aminoacylation                                                                                                                                                                                                                        |
| N | B1N065 | CC | One of the primary rRNA binding proteins, it binds directly to 16S rRNA where<br>it helps nucleate assembly of the platform of the 30S subunit by binding and<br>bridging several RNA helices of the 16S rRNA (By similarity).                    |
| N | B1N065 | DE | 30S ribosomal protein S15;                                                                                                                                                                                                                        |
| N | B1N065 | DR | structural constituent of ribosome                                                                                                                                                                                                                |
| N | B1NKT2 | CC | Intermediate capsid protein that self assembles to form an icosahedral capsid<br>with a T=13 symmetry, which consists of 230 trimers of VP6, with channels at<br>each of its five-fold vertices                                                   |
| N | B1NKT2 | CC | Nacent transcripts are transcribed within the structural confines of this double-<br>layered particle (DLP) and are extruded through the channels at the five-fold axes<br>The innermost VP2 capsid and the intermediate VP6 capsid remain intact |
| N | B1NKT2 | CC | following cell entry to protect the dsRNA from degradation and to prevent<br>unfavorable antiviral responses in the host cell during all the replication cycle of<br>the virus                                                                    |
| N | B1NKT2 | CC | This capsid constitutes the middle concentric layer of the viral mature particle                                                                                                                                                                  |
| N | B1NKT2 | CC | VP6 is required for the transcription activity of the DLP (By similarity).                                                                                                                                                                        |
| N | B1NKT2 | DE | Intermediate capsid protein VP6;                                                                                                                                                                                                                  |

|   |        |    |                                                                                                                                                                                                                                                                                                         |
|---|--------|----|---------------------------------------------------------------------------------------------------------------------------------------------------------------------------------------------------------------------------------------------------------------------------------------------------------|
| N | B1NKT2 | DR | host cell surface receptor binding                                                                                                                                                                                                                                                                      |
| N | B1NKT2 | DR | metal ion binding                                                                                                                                                                                                                                                                                       |
| N | B1NKT2 | DR | structural molecule activity                                                                                                                                                                                                                                                                            |
| N | B1NKT2 | DR | viral envelope fusion with host membrane                                                                                                                                                                                                                                                                |
| N | B1VAE8 | CC | One of the primary rRNA binding proteins, it binds directly near the 3'-end of the 23S rRNA, where it nucleates assembly of the 50S subunit (By similarity).                                                                                                                                            |
| N | B1VAE8 | DE | 50S ribosomal protein L3;                                                                                                                                                                                                                                                                               |
| N | B1VAE8 | DR | structural constituent of ribosome                                                                                                                                                                                                                                                                      |
| N | B1VEZ9 | CC | Catalyzes the conversion of glucosamine-6-phosphate to glucosamine-1-phosphate (By similarity).                                                                                                                                                                                                         |
| N | B1VEZ9 | DE | Phosphoglucosamine mutase;                                                                                                                                                                                                                                                                              |
| N | B1VEZ9 | DR | carbohydrate metabolic process                                                                                                                                                                                                                                                                          |
| N | B1VEZ9 | DR | magnesium ion binding                                                                                                                                                                                                                                                                                   |
| N | B1VEZ9 | DR | phosphoglucosamine mutase activity                                                                                                                                                                                                                                                                      |
| N | B1VIS5 | DE | UPF0133 protein cu1912;                                                                                                                                                                                                                                                                                 |
| N | B1VKJ1 | DE | 30S ribosomal protein S15, chloroplastic;                                                                                                                                                                                                                                                               |
| N | B1VKJ1 | DR | structural constituent of ribosome                                                                                                                                                                                                                                                                      |
| N | B1VUW6 | CC | May play a key role in the regulation of the intracellular concentration of adenosylhomocysteine (By similarity).                                                                                                                                                                                       |
| N | B1VUW6 | DE | Adenosylhomocysteinase;                                                                                                                                                                                                                                                                                 |
| N | B1VUW6 | DE | S-adenosyl-L-homocysteine hydrolase;                                                                                                                                                                                                                                                                    |
| N | B1VUW6 | DR | adenosylhomocysteinase activity                                                                                                                                                                                                                                                                         |
| N | B1VUW6 | DR | one-carbon metabolic process                                                                                                                                                                                                                                                                            |
| N | B1WSL8 | CC | Catalyzes the condensation of ATP and 5-phosphoribose 1- diphosphate to form N <sup>6</sup> -(5'-phosphoribosyl)-ATP (PR-ATP)<br>Has a crucial role in the pathway because the rate of histidine biosynthesis seems to be controlled primarily by regulation of hisG enzymatic activity (By similarity) |
| N | B1WSL8 | CC |                                                                                                                                                                                                                                                                                                         |
| N | B1WSL8 | DE | ATP phosphoribosyltransferase;                                                                                                                                                                                                                                                                          |
| N | B1WSL8 | DE | ATP-PRTase;                                                                                                                                                                                                                                                                                             |
| N | B1WSL8 | DR | ATP phosphoribosyltransferase activity                                                                                                                                                                                                                                                                  |
| N | B1WSL8 | DR | histidine biosynthetic process                                                                                                                                                                                                                                                                          |
| N | B1WWG9 | CC | Binds to Cpn60 in the presence of Mg-ATP and suppresses the ATPase activity of the latter (By similarity).                                                                                                                                                                                              |
| N | B1WWG9 | DE | 10 kDa chaperonin;                                                                                                                                                                                                                                                                                      |
| N | B1WWG9 | DE | GroES protein;                                                                                                                                                                                                                                                                                          |
| N | B1WWG9 | DE | Protein Cpn10;                                                                                                                                                                                                                                                                                          |
| N | B1WWG9 | DR | protein folding                                                                                                                                                                                                                                                                                         |
| N | B1WWJ3 | DE | 50S ribosomal protein L34;                                                                                                                                                                                                                                                                              |
| N | B1WWJ3 | DR | structural constituent of ribosome                                                                                                                                                                                                                                                                      |
| N | B1WWL8 | DE | 50S ribosomal protein L27;                                                                                                                                                                                                                                                                              |
| N | B1WWL8 | DR | structural constituent of ribosome                                                                                                                                                                                                                                                                      |
| N | B1WYG5 | CC | Catalyzes the isomerization of sedoheptulose 7-phosphate in D-glycero-D-manno-heptose 7-phosphate (By similarity).                                                                                                                                                                                      |
| N | B1WYG5 | DE | Phosphoheptose isomerase;                                                                                                                                                                                                                                                                               |
| N | B1WYG5 | DE | Sedoheptulose 7-phosphate isomerase;                                                                                                                                                                                                                                                                    |
| N | B1WYG5 | DR | D-sedoheptulose 7-phosphate isomerase activity                                                                                                                                                                                                                                                          |
| N | B1WYG5 | DR | lipopolysaccharide core region biosynthetic process                                                                                                                                                                                                                                                     |
| N | B1WYG5 | DR | metal ion binding                                                                                                                                                                                                                                                                                       |
| N | B1WYG5 | DR | sugar binding                                                                                                                                                                                                                                                                                           |
| N | B1WZP7 | CC | NDH-1 shuttles electrons from an unknown electron donor, via FMN and iron-sulfur (Fe-S) centers, to quinones in the respiratory and/or the photosynthetic chain                                                                                                                                         |
| N | B1WZP7 | CC | Couples the redox reaction to proton translocation, and thus conserves the redox energy in a proton gradient                                                                                                                                                                                            |
| N | B1WZP7 | CC | Cyanobacterial NDH-1 also plays a role in inorganic carbon- concentration (By similarity).                                                                                                                                                                                                              |
| N | B1WZP7 | CC | The immediate electron acceptor for the enzyme in this species is believed to be plastoquinone                                                                                                                                                                                                          |
| N | B1WZP7 | DE | NAD(P)H dehydrogenase I subunit O;                                                                                                                                                                                                                                                                      |
| N | B1WZP7 | DE | NAD(P)H-quinone oxidoreductase subunit O;                                                                                                                                                                                                                                                               |
| N | B1WZP7 | DE | NDH-1 subunit O;                                                                                                                                                                                                                                                                                        |
| N | B1WZP7 | DR | oxidation-reduction process                                                                                                                                                                                                                                                                             |
| N | B1WZP7 | DR | oxidoreductase activity, acting on NADH or NADPH, quinone or similar compound as acceptor                                                                                                                                                                                                               |
| N | B1WZP7 | DR | quinone binding                                                                                                                                                                                                                                                                                         |

|   |        |    |                                                                                                                                                                                                               |
|---|--------|----|---------------------------------------------------------------------------------------------------------------------------------------------------------------------------------------------------------------|
| N | B1WZT6 | CC | DNA-dependent RNA polymerase catalyzes the transcription of DNA into RNA using the four ribonucleoside triphosphates as substrates (By similarity).                                                           |
| N | B1WZT6 | DE | DNA-directed RNA polymerase subunit beta';                                                                                                                                                                    |
| N | B1WZT6 | DE | RNA polymerase subunit beta';                                                                                                                                                                                 |
| N | B1WZT6 | DE | RNAP subunit beta';                                                                                                                                                                                           |
| N | B1WZT6 | DE | Transcriptase subunit beta';                                                                                                                                                                                  |
| N | B1WZT6 | DR | DNA-directed RNA polymerase activity                                                                                                                                                                          |
| N | B1X6G6 | CC | This protein binds specifically to 23S rRNA; its binding is stimulated by other ribosomal proteins, e.g., L4, L17, and L20                                                                                    |
| N | B1X6G6 | CC | It is important during the early stages of 50S assembly                                                                                                                                                       |
| N | B1X6G6 | CC | It makes multiple contacts with different domains of the 23S rRNA in the assembled 50S subunit and ribosome (By similarity).                                                                                  |
| N | B1X6G6 | DE | 50S ribosomal protein L22;                                                                                                                                                                                    |
| N | B1X6G6 | DR | structural constituent of ribosome                                                                                                                                                                            |
| N | B1X6K0 | CC | Transport system that facilitates potassium-efflux, possibly by potassium-proton antiport (By similarity).                                                                                                    |
| N | B1X6K0 | DE | Glutathione-regulated potassium-efflux system protein kefB;                                                                                                                                                   |
| N | B1X6K0 | DE | K(+)/H(+) antiporter;                                                                                                                                                                                         |
| N | B1X6K0 | DE | NEM-activatable K(+)/H(+) antiporter;                                                                                                                                                                         |
| N | B1X6K0 | DR | catalytic activity                                                                                                                                                                                            |
| N | B1X6K0 | DR | glutathione-regulated potassium exporter activity                                                                                                                                                             |
| N | B1X6K0 | DR | solute:hydrogen antiporter activity                                                                                                                                                                           |
| N | B1X7B3 | CC | Together with moaA, is involved in the conversion of a guanosine derivative (5'-GTP) into molybdopterin precursor Z (By similarity).                                                                          |
| N | B1X7B3 | DE | Molybdenum cofactor biosynthesis protein C;                                                                                                                                                                   |
| N | B1X7B3 | DR | Mo-molybdopterin cofactor biosynthetic process                                                                                                                                                                |
| N | B1XBG0 | CC | Overproduction of CaiE stimulates the activity of CaiB and CaiD (By similarity).                                                                                                                              |
| N | B1XBG0 | DE | Carnitine operon protein CaiE;                                                                                                                                                                                |
| N | B1XBG0 | DR | transferase activity                                                                                                                                                                                          |
| N | B1XDV3 | CC | Binds to the 23S rRNA (By similarity).                                                                                                                                                                        |
| N | B1XDV3 | DE | 50S ribosomal protein L9;                                                                                                                                                                                     |
| N | B1XDV3 | DR | structural constituent of ribosome                                                                                                                                                                            |
| N | B1XFA4 | CC | Catalyzes the formation of S-adenosylmethionine from methionine and ATP                                                                                                                                       |
| N | B1XFA4 | CC | The overall synthetic reaction is composed of two sequential steps, AdoMet formation and the subsequent tripolyphosphate hydrolysis which occurs prior to release of AdoMet from the enzyme (By similarity).  |
| N | B1XFA4 | DE | AdoMet synthase;                                                                                                                                                                                              |
| N | B1XFA4 | DE | Methionine adenosyltransferase;                                                                                                                                                                               |
| N | B1XFA4 | DE | S-adenosylmethionine synthase;                                                                                                                                                                                |
| N | B1XFA4 | DR | metal ion binding                                                                                                                                                                                             |
| N | B1XFA4 | DR | methionine adenosyltransferase activity                                                                                                                                                                       |
| N | B1XFA4 | DR | one-carbon metabolic process                                                                                                                                                                                  |
| N | B1XGU5 | CC | Component of the tagatose-1,6-bisphosphate aldolase kbaYZ that is required for full activity and stability of the Y subunit                                                                                   |
| N | B1XGU5 | CC | Could have a chaperone-like function for the proper and stable folding of kbaY                                                                                                                                |
| N | B1XGU5 | CC | When expressed alone, kbaZ does not show any aldolase activity (By similarity).                                                                                                                               |
| N | B1XGU5 | DE | D-tagatose-1,6-bisphosphate aldolase subunit kbaZ;                                                                                                                                                            |
| N | B1XGU5 | DR | catalytic activity                                                                                                                                                                                            |
| N | B1XGU5 | DR | galactitol metabolic process                                                                                                                                                                                  |
| N | B1XHC9 | CC | The ruvA-ruvB complex in the presence of ATP renatures cruciform structure in supercoiled DNA with palindromic sequence, indicating that it may promote strand exchange reactions in homologous recombination |
| N | B1XHC9 | CC | RuvA stimulates, in the presence of DNA, the weak ATPase activity of ruvB (By similarity).                                                                                                                    |
| N | B1XHC9 | CC | RuvAB is an helicase that mediates the Holliday junction migration by localized denaturation and reannealing                                                                                                  |
| N | B1XHC9 | DE | Holliday junction ATP-dependent DNA helicase ruvA;                                                                                                                                                            |
| N | B1XHC9 | DR | DNA recombination                                                                                                                                                                                             |
| N | B1XHC9 | DR | four-way junction helicase activity                                                                                                                                                                           |
| N | B1XHD8 | CC | Catalyzes the conversion of 5-methoxyuridine (mo5U) to uridine-5-oxyacetic acid (cmo5U) at position 34 in tRNA                                                                                                |
| N | B1XHD8 | CC | May also participate in the methylation of uridine-5-oxyacetic acid (cmo5U) to uridine-5-oxyacetic acid methyl ester (mcmo5U) (By similarity).                                                                |
| N | B1XHD8 | DE | tRNA (cmo5U34)-methyltransferase;                                                                                                                                                                             |
| N | B1XHD8 | DR | tRNA (uracil) methyltransferase activity                                                                                                                                                                      |

|   |        |    |                                                                                                                                                                                                                                              |
|---|--------|----|----------------------------------------------------------------------------------------------------------------------------------------------------------------------------------------------------------------------------------------------|
| N | B1XHD8 | DR | tRNA wobble uridine modification                                                                                                                                                                                                             |
| N | B1XJ13 | CC | Responsible for the release of ribosomes from messenger RNA at the termination of protein biosynthesis                                                                                                                                       |
| N | B1XJ13 | CC | May increase the efficiency of translation by recycling ribosomes from one round of translation to another (By similarity).                                                                                                                  |
| N | B1XJ13 | DE | Ribosome-recycling factor;                                                                                                                                                                                                                   |
| N | B1XJ13 | DE | Ribosome-releasing factor;                                                                                                                                                                                                                   |
| N | B1XQ70 | CC | Thiolesterase that catalyzes the hydrolysis of S-D- lactoyl-glutathione to form glutathione and D-lactic acid (By similarity).                                                                                                               |
| N | B1XQ70 | DE | Glyoxalase II;                                                                                                                                                                                                                               |
| N | B1XQ70 | DE | Hydroxyacylglutathione hydrolase;                                                                                                                                                                                                            |
| N | B1XQ70 | DR | hydroxyacylglutathione hydrolase activity                                                                                                                                                                                                    |
| N | B1XQ70 | DR | zinc ion binding                                                                                                                                                                                                                             |
| N | B1XT83 | CC | Could be a nuclease that resolves Holliday junction intermediates in genetic recombination (By similarity).                                                                                                                                  |
| N | B1XT83 | DE | Putative Holliday junction resolvase;                                                                                                                                                                                                        |
| N | B1XT83 | DR | DNA recombination                                                                                                                                                                                                                            |
| N | B1XT83 | DR | nuclease activity                                                                                                                                                                                                                            |
| N | B1XT83 | DR | nucleic acid binding                                                                                                                                                                                                                         |
| N | B1XU85 | CC | Plays an important role in the de novo pathway of purine nucleotide biosynthesis                                                                                                                                                             |
| N | B1XU85 | CC | Catalyzes the first committed step in the biosynthesis of AMP from IMP (By similarity)                                                                                                                                                       |
| N | B1XU85 | DE | Adenylosuccinate synthetase;                                                                                                                                                                                                                 |
| N | B1XU85 | DE | IMP--aspartate ligase;                                                                                                                                                                                                                       |
| N | B1XU85 | DR | adenylosuccinate synthase activity                                                                                                                                                                                                           |
| N | B1XU85 | DR | magnesium ion binding                                                                                                                                                                                                                        |
| N | B1XU85 | DR | purine nucleotide biosynthetic process                                                                                                                                                                                                       |
| N | B1XUJ8 | CC | NDH-1 shuttles electrons from NADH, via FMN and iron- sulfur (Fe-S) centers, to quinones in the respiratory chain                                                                                                                            |
| N | B1XUJ8 | CC | Couples the redox reaction to proton translocation (for every two electrons transferred, four hydrogen ions are translocated across the cytoplasmic membrane), and thus conserves the redox energy in a proton gradient (By similarity)      |
| N | B1XUJ8 | CC | The immediate electron acceptor for the enzyme in this species is believed to be ubiquinone                                                                                                                                                  |
| N | B1XUJ8 | DE | NADH dehydrogenase I subunit A;                                                                                                                                                                                                              |
| N | B1XUJ8 | DE | NADH-quinone oxidoreductase subunit A;                                                                                                                                                                                                       |
| N | B1XUJ8 | DE | NDH-1 subunit A;                                                                                                                                                                                                                             |
| N | B1XUJ8 | DR | NADH dehydrogenase (ubiquinone) activity                                                                                                                                                                                                     |
| N | B1XUJ8 | DR | oxidation-reduction process                                                                                                                                                                                                                  |
| N | B1XUJ8 | DR | quinone binding                                                                                                                                                                                                                              |
| N | B1XUJ9 | CC | NDH-1 shuttles electrons from NADH, via FMN and iron- sulfur (Fe-S) centers, to quinones in the respiratory chain                                                                                                                            |
| N | B1XUJ9 | CC | Couples the redox reaction to proton translocation (for every two electrons transferred, four hydrogen ions are translocated across the cytoplasmic membrane), and thus conserves the redox energy in a proton gradient (By similarity)      |
| N | B1XUJ9 | DE | NADH dehydrogenase I subunit B;                                                                                                                                                                                                              |
| N | B1XUJ9 | DE | NADH-quinone oxidoreductase subunit B;                                                                                                                                                                                                       |
| N | B1XUJ9 | DE | NDH-1 subunit B;                                                                                                                                                                                                                             |
| N | B1XUJ9 | DR | 4 iron, 4 sulfur cluster binding                                                                                                                                                                                                             |
| N | B1XUJ9 | DR | NADH dehydrogenase (ubiquinone) activity                                                                                                                                                                                                     |
| N | B1XUJ9 | DR | metal ion binding                                                                                                                                                                                                                            |
| N | B1XUJ9 | DR | oxidation-reduction process                                                                                                                                                                                                                  |
| N | B1XUJ9 | DR | quinone binding                                                                                                                                                                                                                              |
| N | B1XW28 | CC | This enzyme is involved in nucleotide metabolism: it produces dUMP, the immediate precursor of thymidine nucleotides and it decreases the intracellular concentration of dUTP so that uracil cannot be incorporated into DNA (By similarity) |
| N | B1XW28 | DE | Deoxyuridine 5'-triphosphate nucleotidohydrolase;                                                                                                                                                                                            |
| N | B1XW28 | DE | dUTP pyrophosphatase;                                                                                                                                                                                                                        |
| N | B1XW28 | DR | dUTP diphosphatase activity                                                                                                                                                                                                                  |
| N | B1XW28 | DR | dUTP metabolic process                                                                                                                                                                                                                       |
| N | B1XW28 | DR | metal ion binding                                                                                                                                                                                                                            |
| N | B1XX97 | DE | Phosphoribosyl-AMP cyclohydrolase;                                                                                                                                                                                                           |
| N | B1XX97 | DR | histidine biosynthetic process                                                                                                                                                                                                               |
| N | B1XX97 | DR | phosphoribosyl-AMP cyclohydrolase activity                                                                                                                                                                                                   |
| N | B1Y0H7 | CC | Specifically methylates guanosine-37 in various tRNAs (By similarity).                                                                                                                                                                       |
| N | B1Y0H7 | DE | M1G-methyltransferase;                                                                                                                                                                                                                       |

|   |        |    |                                                                                                                                                                                   |
|---|--------|----|-----------------------------------------------------------------------------------------------------------------------------------------------------------------------------------|
| N | B1Y0H7 | DE | tRNA (guanine-N(1)-)-methyltransferase;                                                                                                                                           |
| N | B1Y0H7 | DE | tRNA [GM37] methyltransferase;                                                                                                                                                    |
| N | B1Y0H7 | DR | tRNA (guanine-N1-)-methyltransferase activity                                                                                                                                     |
| N | B1YD57 | DE | Shikimate dehydrogenase;                                                                                                                                                          |
| N | B1YD57 | DR | aromatic amino acid family biosynthetic process                                                                                                                                   |
| N | B1YD57 | DR | oxidation-reduction process                                                                                                                                                       |
| N | B1YD57 | DR | shikimate 5-dehydrogenase activity                                                                                                                                                |
| N | B1YIY0 | CC | Catalyzes the dehydration of methylthioribulose-1- phosphate (MTRu-1-P) into 2,3-diketo-5-methylthiopentyl-1- phosphate (DK-MTP-1-P) (By similarity).                             |
| N | B1YIY0 | DE | MTRu-1-P dehydratase;                                                                                                                                                             |
| N | B1YIY0 | DE | Methylthioribulose-1-phosphate dehydratase;                                                                                                                                       |
| N | B1YIY0 | DR | L-methionine salvage                                                                                                                                                              |
| N | B1YIY0 | DR | metal ion binding                                                                                                                                                                 |
| N | B1YIY0 | DR | methylthioribulose 1-phosphate dehydratase activity                                                                                                                               |
| N | B1YJ30 | CC | Catalyzes the reversible isomerization-deamination of glucosamine 6-phosphate (GlcN6P) to form fructose 6-phosphate (Fru6P) and ammonium ion (By similarity)                      |
| N | B1YJ30 | DE | GlcN6P deaminase;                                                                                                                                                                 |
| N | B1YJ30 | DE | Glucosamine-6-phosphate deaminase;                                                                                                                                                |
| N | B1YJ30 | DE | Glucosamine-6-phosphate isomerase;                                                                                                                                                |
| N | B1YJ30 | DR | N-acetylglucosamine metabolic process                                                                                                                                             |
| N | B1YJ30 | DR | glucosamine-6-phosphate deaminase activity                                                                                                                                        |
| N | B1YJ30 | DR | hydrolase activity                                                                                                                                                                |
| N | B1YKE7 | DE | UPF0316 protein Exig_2248;                                                                                                                                                        |
| N | B1YLQ2 | CC | bidirectionally degrades single-stranded DNA into large acid-insoluble oligonucleotides, which are then degraded further into small acid-soluble oligonucleotides (By similarity) |
| N | B1YLQ2 | DE | Exodeoxyribonuclease 7 large subunit;                                                                                                                                             |
| N | B1YLQ2 | DE | Exodeoxyribonuclease VII large subunit;                                                                                                                                           |
| N | B1YLQ2 | DE | Exonuclease VII large subunit;                                                                                                                                                    |
| N | B1YLQ2 | DR | DNA catabolic process                                                                                                                                                             |
| N | B1YLQ2 | DR | exodeoxyribonuclease VII activity                                                                                                                                                 |
| N | B1YLQ2 | DR | nucleic acid binding                                                                                                                                                              |
| N | B1YRR0 | CC | Necessary for normal cell division and for the maintenance of normal septation (By similarity).                                                                                   |
| N | B1YRR0 | DE | Probable GTP-binding protein EngB;                                                                                                                                                |
| N | B1YRR0 | DR | barrier septum formation                                                                                                                                                          |
| N | B1YRV7 | DE | Imidazoleglycerol-phosphate dehydratase;                                                                                                                                          |
| N | B1YRV7 | DR | histidine biosynthetic process                                                                                                                                                    |
| N | B1YRV7 | DR | imidazoleglycerol-phosphate dehydratase activity                                                                                                                                  |
| N | B1Z778 | CC | This protein binds to the 23S rRNA, and is important in its secondary structure                                                                                                   |
| N | B1Z778 | CC | It is located near the subunit interface in the base of the L7/L12 stalk, and near the tRNA binding site of the peptidyltransferase center (By similarity).                       |
| N | B1Z778 | DE | 50S ribosomal protein L6;                                                                                                                                                         |
| N | B1Z778 | DR | structural constituent of ribosome                                                                                                                                                |
| N | B1ZFJ0 | CC | Catalyzes the NADPH dependent reduction of L-gamma- glutamyl 5-phosphate into L-glutamate 5-semialdehyde and phosphate                                                            |
| N | B1ZFJ0 | CC | The product spontaneously undergoes cyclization to form 1-pyrroline-5-carboxylate (By similarity).                                                                                |
| N | B1ZFJ0 | DE | GSA dehydrogenase;                                                                                                                                                                |
| N | B1ZFJ0 | DE | Gamma-glutamyl phosphate reductase;                                                                                                                                               |
| N | B1ZFJ0 | DE | Glutamate-5-semialdehyde dehydrogenase;                                                                                                                                           |
| N | B1ZFJ0 | DE | Glutamyl-gamma-semialdehyde dehydrogenase;                                                                                                                                        |
| N | B1ZFJ0 | DR | glutamate-5-semialdehyde dehydrogenase activity                                                                                                                                   |
| N | B1ZFJ0 | DR | oxidation-reduction process                                                                                                                                                       |
| N | B1ZFJ0 | DR | proline biosynthetic process                                                                                                                                                      |
| N | B1ZJM9 | CC | Negatively regulates transcription of bacterial ribonucleotide reductase nrd genes and operons by binding to NrdR- boxes (By similarity).                                         |
| N | B1ZJM9 | DE | Transcriptional repressor NrdR;                                                                                                                                                   |
| N | B1ZJM9 | DR | transcription repressor activity                                                                                                                                                  |
| N | B1ZJM9 | DR | zinc ion binding                                                                                                                                                                  |
| N | B2A474 | CC | RNaseP catalyzes the removal of the 5'-leader sequence from pre-tRNA to produce the mature 5'-terminus                                                                            |
| N | B2A474 | CC | It can also cleave other RNA substrates such as 4.5S RNA                                                                                                                          |
| N | B2A474 | CC | The protein component plays an auxiliary but essential role in vivo by binding to the 5'-leader sequence and broadening the substrate specificity of the ribozyme (By similarity) |
| N | B2A474 | DE | RNase P protein;                                                                                                                                                                  |



|   |        |    |                                                                                                                                                                                                                                                                                                                                                                   |
|---|--------|----|-------------------------------------------------------------------------------------------------------------------------------------------------------------------------------------------------------------------------------------------------------------------------------------------------------------------------------------------------------------------|
| N | B2A474 | DE | RNaseP protein;                                                                                                                                                                                                                                                                                                                                                   |
| N | B2A474 | DE | Ribonuclease P protein component;                                                                                                                                                                                                                                                                                                                                 |
| N | B2A474 | DR | ribonuclease P activity                                                                                                                                                                                                                                                                                                                                           |
| N | B2A474 | DR | tRNA processing                                                                                                                                                                                                                                                                                                                                                   |
| N | B2FQJ3 | CC | One of the primary rRNA binding proteins, it binds specifically to the 5'-end of 16S ribosomal RNA (By similarity).                                                                                                                                                                                                                                               |
| N | B2FQJ3 | DE | 30S ribosomal protein S17;                                                                                                                                                                                                                                                                                                                                        |
| N | B2FQJ3 | DR | structural constituent of ribosome                                                                                                                                                                                                                                                                                                                                |
| N | B2FQK6 | CC | Located on the platform of the 30S subunit, it bridges several disparate RNA helices of the 16S rRNA                                                                                                                                                                                                                                                              |
| N | B2FQK6 | CC | Forms part of the Shine-Dalgarno cleft in the 70S ribosome (By similarity).                                                                                                                                                                                                                                                                                       |
| N | B2FQK6 | DE | 30S ribosomal protein S11;                                                                                                                                                                                                                                                                                                                                        |
| N | B2FQK6 | DR | structural constituent of ribosome                                                                                                                                                                                                                                                                                                                                |
| N | B2FUM0 | CC | Together with moaC, is involved in the conversion of a guanosine derivative (5'-GTP) into molybdopterin precursor Z (By similarity).                                                                                                                                                                                                                              |
| N | B2FUM0 | DE | Molybdenum cofactor biosynthesis protein A;                                                                                                                                                                                                                                                                                                                       |
| N | B2FUM0 | DR | 4 iron, 4 sulfur cluster binding                                                                                                                                                                                                                                                                                                                                  |
| N | B2FUM0 | DR | Mo-molybdopterin cofactor biosynthetic process                                                                                                                                                                                                                                                                                                                    |
| N | B2FUM0 | DR | catalytic activity                                                                                                                                                                                                                                                                                                                                                |
| N | B2FUM0 | DR | metal ion binding                                                                                                                                                                                                                                                                                                                                                 |
| N | B2G6U2 | CC | Associates with the EF-Tu.GDP complex and induces the exchange of GDP to GTP                                                                                                                                                                                                                                                                                      |
| N | B2G6U2 | CC | It remains bound to the aminoacyl-tRNA.EF- Tu.GTP complex up to the GTP hydrolysis stage on the ribosome (By similarity).                                                                                                                                                                                                                                         |
| N | B2G6U2 | DE | Elongation factor Ts;                                                                                                                                                                                                                                                                                                                                             |
| N | B2G6U2 | DR | translation elongation factor activity                                                                                                                                                                                                                                                                                                                            |
| N | B2GAH9 | CC | Binds to Cpn60 in the presence of Mg-ATP and suppresses the ATPase activity of the latter (By similarity).                                                                                                                                                                                                                                                        |
| N | B2GAH9 | DE | 10 kDa chaperonin;                                                                                                                                                                                                                                                                                                                                                |
| N | B2GAH9 | DE | GroES protein;                                                                                                                                                                                                                                                                                                                                                    |
| N | B2GAH9 | DE | Protein Cpn10;                                                                                                                                                                                                                                                                                                                                                    |
| N | B2GAH9 | DR | protein folding                                                                                                                                                                                                                                                                                                                                                   |
| N | B2GAI0 | CC | Prevents misfolding and promotes the refolding and proper assembly of unfolded polypeptides generated under stress conditions (By similarity).                                                                                                                                                                                                                    |
| N | B2GAI0 | DE | 60 kDa chaperonin;                                                                                                                                                                                                                                                                                                                                                |
| N | B2GAI0 | DE | GroEL protein;                                                                                                                                                                                                                                                                                                                                                    |
| N | B2GAI0 | DE | Protein Cpn60;                                                                                                                                                                                                                                                                                                                                                    |
| N | B2GAI0 | DR | protein refolding                                                                                                                                                                                                                                                                                                                                                 |
| N | B2GB29 | CC | Endonuclease that specifically degrades the RNA of RNA- DNA hybrids (By similarity).                                                                                                                                                                                                                                                                              |
| N | B2GB29 | DE | RNase HIII;                                                                                                                                                                                                                                                                                                                                                       |
| N | B2GB29 | DE | Ribonuclease HIII;                                                                                                                                                                                                                                                                                                                                                |
| N | B2GB29 | DR | RNA metabolic process                                                                                                                                                                                                                                                                                                                                             |
| N | B2GB29 | DR | metal ion binding                                                                                                                                                                                                                                                                                                                                                 |
| N | B2GB29 | DR | ribonuclease H activity                                                                                                                                                                                                                                                                                                                                           |
| N | B2GBB8 | CC | One of the primary rRNA binding proteins, it binds directly to 16S rRNA where it helps nucleate assembly of the platform of the 30S subunit by binding and bridging several RNA helices of the 16S rRNA (By similarity).                                                                                                                                          |
| N | B2GBB8 | DE | 30S ribosomal protein S15;                                                                                                                                                                                                                                                                                                                                        |
| N | B2GBB8 | DR | structural constituent of ribosome                                                                                                                                                                                                                                                                                                                                |
| N | B2GBD0 | CC | An essential GTPase which binds GTP, GDP and possibly (p)ppGpp with moderate affinity, with high nucleotide exchange rates and a fairly low GTP hydrolysis rate (By similarity)<br>it may play a role in control of the cell cycle, stress response, ribosome biogenesis and in those bacteria that undergo differentiation, in morphogenesis control (Potential) |
| N | B2GBD0 | DE | GTP-binding protein obg;                                                                                                                                                                                                                                                                                                                                          |
| N | B2GBD0 | DR | GTPase activity                                                                                                                                                                                                                                                                                                                                                   |
| N | B2GBD0 | DR | magnesium ion binding                                                                                                                                                                                                                                                                                                                                             |
| N | B2GHT7 | CC | Catalyzes the condensation of the acetyl group of acetyl-CoA with 3-methyl-2-oxobutanoate (2-oxoisovalerate) to form 3-carboxy-3-hydroxy-4-methylpentanoate (2-isopropylmalate) (By similarity).                                                                                                                                                                  |
| N | B2GHT7 | DE | 2-isopropylmalate synthase;                                                                                                                                                                                                                                                                                                                                       |
| N | B2GHT7 | DE | Alpha-IPM synthase;                                                                                                                                                                                                                                                                                                                                               |
| N | B2GHT7 | DE | Alpha-isopropylmalate synthase;                                                                                                                                                                                                                                                                                                                                   |
| N | B2GHT7 | DR | 2-isopropylmalate synthase activity                                                                                                                                                                                                                                                                                                                               |
| N | B2GHT7 | DR | leucine biosynthetic process                                                                                                                                                                                                                                                                                                                                      |

|   |        |    |                                                                                                                                                                                                                          |
|---|--------|----|--------------------------------------------------------------------------------------------------------------------------------------------------------------------------------------------------------------------------|
| N | B2GIN9 | CC | Catalyzes the covalent attachment of the prokaryotic ubiquitin-like protein modifier Pup to the proteasomal substrate proteins, thereby targeting them for proteasomal degradation.                                      |
| N | B2GIN9 | CC | The tagging reaction involves the side-chain carboxylate of the C-terminal glutamate of Pup and the side-chain amino group of a substrate lysine (By similarity).                                                        |
| N | B2GIN9 | CC | This tagging system is termed pupylation.                                                                                                                                                                                |
| N | B2GIN9 | DE | Proteasome accessory factor A;                                                                                                                                                                                           |
| N | B2GIN9 | DE | Pup--protein ligase;                                                                                                                                                                                                     |
| N | B2GIN9 | DE | Pup-conjugating enzyme;                                                                                                                                                                                                  |
| N | B2GIN9 | DR | acid-amino acid ligase activity                                                                                                                                                                                          |
| N | B2GIN9 | DR | modification-dependent protein catabolic process                                                                                                                                                                         |
| N | B2GIN9 | DR | proteasomal protein catabolic process                                                                                                                                                                                    |
| N | B2GM13 | CC | Catalyzes the reversible conversion of 2- phosphoglycerate into phosphoenolpyruvate.                                                                                                                                     |
| N | B2GM13 | CC | It is essential for the degradation of carbohydrates via glycolysis (By similarity).                                                                                                                                     |
| N | B2GM13 | DE | 2-phospho-D-glycerate hydro-lyase;                                                                                                                                                                                       |
| N | B2GM13 | DE | 2-phosphoglycerate dehydratase;                                                                                                                                                                                          |
| N | B2GM13 | DR | magnesium ion binding                                                                                                                                                                                                    |
| N | B2GM13 | DR | phosphopyruvate hydratase activity                                                                                                                                                                                       |
| N | B2HCU4 | CC | Exhibits S-adenosyl-L-methionine-dependent methyltransferase activity (By similarity).                                                                                                                                   |
| N | B2HCU4 | DE | Putative S-adenosyl-L-methionine-dependent methyltransferase MMAR_1058;                                                                                                                                                  |
| N | B2HCU4 | DR | methyltransferase activity                                                                                                                                                                                               |
| N | B2HDJ9 | CC | Catalyzes the phosphorylation of the position 2 hydroxy group of 4-diphosphocytidyl-2C-methyl-D-erythritol (By similarity).                                                                                              |
| N | B2HDJ9 | DE | 4-(cytidine-5'-diphospho)-2-C-methyl-D-erythritol kinase;                                                                                                                                                                |
| N | B2HDJ9 | DE | 4-diphosphocytidyl-2-C-methyl-D-erythritol kinase;                                                                                                                                                                       |
| N | B2HDJ9 | DR | 4-(cytidine 5'-diphospho)-2-C-methyl-D-erythritol kinase activity                                                                                                                                                        |
| N | B2HDJ9 | DR | terpenoid biosynthetic process                                                                                                                                                                                           |
| N | B2HGR0 | CC | Cell division protein that is part of the divisome complex and is recruited early to the Z-ring                                                                                                                          |
| N | B2HGR0 | CC | Its function overlaps with ftsA (By similarity).                                                                                                                                                                         |
| N | B2HGR0 | CC | Probably stimulates Z-ring formation, perhaps through the cross-linking of ftsZ protofilaments                                                                                                                           |
| N | B2HGR0 | DE | Cell division protein sepF;                                                                                                                                                                                              |
| N | B2HGR0 | DR | barrier septum formation                                                                                                                                                                                                 |
| N | B2HMC9 | CC | Binds directly to 16S ribosomal RNA (By similarity).                                                                                                                                                                     |
| N | B2HMC9 | DE | 30S ribosomal protein S20;                                                                                                                                                                                               |
| N | B2HMC9 | DR | structural constituent of ribosome                                                                                                                                                                                       |
| N | B2HTV8 | CC | Oxygenase that introduces the hydroxyl group at carbon five of 2-nonaprenyl-3-methyl-6-methoxy-1,4-benzoquinol resulting in the formation of 2-nonaprenyl-3-methyl-5-hydroxy-6-methoxy-1,4- benzoquinol (By similarity). |
| N | B2HTV8 | DE | 2-nonaprenyl-3-methyl-6-methoxy-1,4-benzoquinol hydroxylase;                                                                                                                                                             |
| N | B2HTV8 | DE | 5-demethoxyubiquinone hydroxylase;                                                                                                                                                                                       |
| N | B2HTV8 | DE | DMQ hydroxylase;                                                                                                                                                                                                         |
| N | B2HTV8 | DR | monooxygenase activity                                                                                                                                                                                                   |
| N | B2HTV8 | DR | oxidation-reduction process                                                                                                                                                                                              |
| N | B2HTV8 | DR | protein metabolic process                                                                                                                                                                                                |
| N | B2HTV8 | DR | transition metal ion binding                                                                                                                                                                                             |
| N | B2HTV8 | DR | ubiquinone biosynthetic process                                                                                                                                                                                          |
| N | B2HX50 | CC | This protein is involved in the repair of mismatches in DNA                                                                                                                                                              |
| N | B2HX50 | CC | It is possible that it carries out the mismatch recognition step                                                                                                                                                         |
| N | B2HX50 | CC | This protein has a weak ATPase activity (By similarity).                                                                                                                                                                 |
| N | B2HX50 | DE | DNA mismatch repair protein mutS;                                                                                                                                                                                        |
| N | B2HX50 | DR | mismatch repair                                                                                                                                                                                                          |
| N | B2HX50 | DR | mismatched DNA binding                                                                                                                                                                                                   |
| N | B2HX89 | CC | Catalyzes the oxidation of erythronate-4-phosphate to 3- hydroxy-2-oxo-4-phosphonooxybutanoate (By similarity).                                                                                                          |
| N | B2HX89 | DE | Erythronate-4-phosphate dehydrogenase;                                                                                                                                                                                   |
| N | B2HX89 | DR | 4-phosphoerythronate dehydrogenase activity                                                                                                                                                                              |
| N | B2HX89 | DR | oxidation-reduction process                                                                                                                                                                                              |
| N | B2HX89 | DR | pyridoxine biosynthetic process                                                                                                                                                                                          |
| N | B2HZB6 | DE | Phosphoglycerate kinase;                                                                                                                                                                                                 |
| N | B2HZB6 | DR | phosphoglycerate kinase activity                                                                                                                                                                                         |
| N | B2I3A5 | CC | Transfers the N-acyl diglyceride group on what will become the N-terminal cysteine of membrane lipoproteins (By similarity).                                                                                             |
| N | B2I3A5 | DE | Prolipoprotein diacylglyceryl transferase;                                                                                                                                                                               |
| N | B2I3A5 | DR | lipoprotein biosynthetic process                                                                                                                                                                                         |

|   |        |    |                                                                                                                                                         |
|---|--------|----|---------------------------------------------------------------------------------------------------------------------------------------------------------|
| N | B2I3A5 | DR | protein lipoylation                                                                                                                                     |
| N | B2I3A5 | DR | transferase activity, transferring glycosyl groups                                                                                                      |
| N | B2I658 | CC | Channel that opens in response to stretch forces in the membrane lipid bilayer                                                                          |
| N | B2I658 | CC | May participate in the regulation of osmotic pressure changes within the cell (By similarity).                                                          |
| N | B2I658 | DE | Large-conductance mechanosensitive channel;                                                                                                             |
| N | B2I658 | DR | ion channel activity                                                                                                                                    |
| N | B2I6G9 | CC | Cleaves GlcNAc linked beta-1,4 to MurNAc tripeptides (By similarity).                                                                                   |
| N | B2I6G9 | DE | Beta-N-acetylhexosaminidase;                                                                                                                            |
| N | B2I6G9 | DE | Beta-hexosaminidase;                                                                                                                                    |
| N | B2I6G9 | DE | N-acetyl-beta-glucosaminidase;                                                                                                                          |
| N | B2I6G9 | DR | beta-N-acetylhexosaminidase activity                                                                                                                    |
| N | B2I6G9 | DR | cell division                                                                                                                                           |
| N | B2I6G9 | DR | cellular cell wall organization                                                                                                                         |
| N | B2I6G9 | DR | peptidoglycan biosynthetic process                                                                                                                      |
| N | B2I6G9 | DR | regulation of cell shape                                                                                                                                |
| N | B2IG63 | CC | The natural substrate for this enzyme may be peptidyl- tRNAs which drop off the ribosome during protein synthesis (By similarity).                      |
| N | B2IG63 | DE | Peptidyl-tRNA hydrolase;                                                                                                                                |
| N | B2IG63 | DR | aminoacyl-tRNA hydrolase activity                                                                                                                       |
| N | B2INJ3 | CC | Involved in the biosynthesis of D-alanyl-lipoteichoic acid (LTA)                                                                                        |
| N | B2INJ3 | CC | Activated D-alanyl-Dcp donates its D-alanyl substituent to membrane-associated LTA (By similarity).                                                     |
| N | B2INJ3 | DE | D-alanine--poly(phosphoribitol) ligase subunit 2;                                                                                                       |
| N | B2INJ3 | DE | D-alanyl carrier protein;                                                                                                                               |
| N | B2INJ3 | DR | D-alanine-poly(phosphoribitol) ligase activity                                                                                                          |
| N | B2INJ3 | DR | acyl carrier activity                                                                                                                                   |
| N | B2INJ3 | DR | cellular cell wall organization                                                                                                                         |
| N | B2INJ3 | DR | cofactor binding                                                                                                                                        |
| N | B2INJ3 | DR | regulation of cell shape                                                                                                                                |
| N | B2INJ3 | DR | teichoic acid biosynthetic process                                                                                                                      |
| N | B2IR58 | CC | Binds as a heterodimer with protein S6 to the central domain of the 16S rRNA, where it helps stabilize the platform of the 30S subunit (By similarity). |
| N | B2IR58 | DE | 30S ribosomal protein S18;                                                                                                                              |
| N | B2IR58 | DR | structural constituent of ribosome                                                                                                                      |
| N | B2IWE2 | CC | Required for the first step of histidine biosynthesis                                                                                                   |
| N | B2IWE2 | CC | May allow the feedback regulation of ATP phosphoribosyltransferase activity by histidine (By similarity).                                               |
| N | B2IWE2 | DE | ATP phosphoribosyltransferase regulatory subunit;                                                                                                       |
| N | B2IWE2 | DR | histidine biosynthetic process                                                                                                                          |
| N | B2IWE2 | DR | histidine-tRNA ligase activity                                                                                                                          |
| N | B2IWE2 | DR | histidyl-tRNA aminoacylation                                                                                                                            |
| N | B2IX54 | DE | AICAR transformylase;                                                                                                                                   |
| N | B2IX54 | DE | Bifunctional purine biosynthesis protein purH;                                                                                                          |
| N | B2IX54 | DE | IMP cyclohydrolase;                                                                                                                                     |
| N | B2IX54 | DE | IMP synthase;                                                                                                                                           |
| N | B2IX54 | DE | Inosinicase;                                                                                                                                            |
| N | B2IX54 | DE | Phosphoribosylaminoimidazolecarboxamide formyltransferase;                                                                                              |
| N | B2IX54 | DR | IMP biosynthetic process                                                                                                                                |
| N | B2IX54 | DR | IMP cyclohydrolase activity                                                                                                                             |
| N | B2IX54 | DR | phosphoribosylaminoimidazolecarboxamide formyltransferase activity                                                                                      |
| N | B2J5E4 | CC | Catalyzes the NADPH-dependent reduction of glutamyl- tRNA(Glu) to glutamate 1-semialdehyde (GSA) (By similarity).                                       |
| N | B2J5E4 | DE | Glutamyl-tRNA reductase;                                                                                                                                |
| N | B2J5E4 | DR | chlorophyll biosynthetic process                                                                                                                        |
| N | B2J5E4 | DR | glutamyl-tRNA reductase activity                                                                                                                        |
| N | B2J5E4 | DR | oxidation-reduction process                                                                                                                             |
| N | B2J5E4 | DR | shikimate 5-dehydrogenase activity                                                                                                                      |
| N | B2J6T8 | CC | Binds together with S18 to 16S ribosomal RNA (By similarity).                                                                                           |
| N | B2J6T8 | DE | 30S ribosomal protein S6;                                                                                                                               |
| N | B2J6T8 | DR | structural constituent of ribosome                                                                                                                      |
| N | B2JF36 | CC | May play a role in 30S ribosomal subunit biogenesis                                                                                                     |
| N | B2JF36 | CC | Unusual circularly permuted GTPase that catalyzes rapid hydrolysis of GTP with a slow catalytic turnover (By similarity).                               |
| N | B2JF36 | DE | Putative ribosome biogenesis GTPase RsgA;                                                                                                               |

|   |        |    |                                                                                                                                                                                    |
|---|--------|----|------------------------------------------------------------------------------------------------------------------------------------------------------------------------------------|
| N | B2JF36 | DR | GTPase activity                                                                                                                                                                    |
| N | B2JF36 | DR | metal ion binding                                                                                                                                                                  |
| N | B2JI57 | CC | One of the primary rRNA binding proteins, it binds specifically to the 5'-end of 16S ribosomal RNA (By similarity).                                                                |
| N | B2JI57 | DE | 30S ribosomal protein S17;                                                                                                                                                         |
| N | B2JI57 | DR | structural constituent of ribosome                                                                                                                                                 |
| N | B2JNF0 | DE | PKHD-type hydroxylase Bphy_5374;                                                                                                                                                   |
| N | B2JNF0 | DR | L-ascorbic acid binding                                                                                                                                                            |
| N | B2JNF0 | DR | iron ion binding                                                                                                                                                                   |
| N | B2JNF0 | DR | oxidation-reduction process                                                                                                                                                        |
| N | B2JNF0 | DR | oxidoreductase activity, acting on paired donors, with incorporation or reduction of molecular oxygen                                                                              |
| N | B2JNF0 | DR | oxidoreductase activity, acting on single donors with incorporation of molecular oxygen, incorporation of two atoms of oxygen                                                      |
| N | B2JZM8 | DE | Histidinol-phosphate aminotransferase;                                                                                                                                             |
| N | B2JZM8 | DE | Imidazole acetol-phosphate transaminase;                                                                                                                                           |
| N | B2JZM8 | DR | histidine biosynthetic process                                                                                                                                                     |
| N | B2JZM8 | DR | histidinol-phosphate transaminase activity                                                                                                                                         |
| N | B2JZM8 | DR | pyridoxal phosphate binding                                                                                                                                                        |
| N | B2K0Q4 | CC | The glycine cleavage system catalyzes the degradation of glycine                                                                                                                   |
| N | B2K0Q4 | CC | The H protein shuttles the methylamine group of glycine from the P protein to the T protein (By similarity).                                                                       |
| N | B2K0Q4 | DE | Glycine cleavage system H protein;                                                                                                                                                 |
| N | B2K0Q4 | DR | glycine decarboxylation via glycine cleavage system                                                                                                                                |
| N | B2K111 | CC | Seems to be the binding site for several of the factors involved in protein synthesis and appears to be essential for accurate translation (By similarity).                        |
| N | B2K111 | DE | 50S ribosomal protein L7/L12;                                                                                                                                                      |
| N | B2K111 | DR | structural constituent of ribosome                                                                                                                                                 |
| N | B2K1Z5 | DE | Phosphatidylserine decarboxylase alpha chain;                                                                                                                                      |
| N | B2K1Z5 | DE | Phosphatidylserine decarboxylase beta chain;                                                                                                                                       |
| N | B2K1Z5 | DE | Phosphatidylserine decarboxylase proenzyme;                                                                                                                                        |
| N | B2K1Z5 | DR | phosphatidylserine decarboxylase activity                                                                                                                                          |
| N | B2K1Z5 | DR | phospholipid biosynthetic process                                                                                                                                                  |
| N | B2K3F6 | CC | Involved in the degradation of phospho-AI-2, thereby terminating induction of the lsr operon and closing the AI-2 signaling cycle                                                  |
| N | B2K3F6 | CC | Catalyzes the cleavage of phosphorylated 4,5- dihydroxy-2,3-pentanedione (r-DPD) to 2-phosphoglycolic acid (PG) and another three-carbon compound (By similarity)                  |
| N | B2K3F6 | DE | AI-2-degrading protein lsrG;                                                                                                                                                       |
| N | B2K3F6 | DE | Autoinducer 2-degrading protein lsrG;                                                                                                                                              |
| N | B2K3F6 | DR | antibiotic biosynthetic process                                                                                                                                                    |
| N | B2K3F6 | DR | oxidoreductase activity                                                                                                                                                            |
| N | B2K5L5 | CC | Catalyzes the conversion of UDP-4-keto-arabinose (UDP- Ara4O) to UDP-4-amino-4-deoxy-L-arabinose (UDP-L-Ara4N)                                                                     |
| N | B2K5L5 | CC | The modified arabinose is attached to lipid A and is required for resistance to polymyxin and cationic antimicrobial peptides (By similarity).                                     |
| N | B2K5L5 | DE | UDP-(beta-L-threo-pentapyranosyl-4"-ulose diphosphate) aminotransferase;                                                                                                           |
| N | B2K5L5 | DE | UDP-4-amino-4-deoxy-L-arabinose aminotransferase;                                                                                                                                  |
| N | B2K5L5 | DE | UDP-4-amino-4-deoxy-L-arabinose--oxoglutarate aminotransferase;                                                                                                                    |
| N | B2K5L5 | DE | UDP-Ara4O aminotransferase;                                                                                                                                                        |
| N | B2K5L5 | DR | lipid A biosynthetic process                                                                                                                                                       |
| N | B2K5L5 | DR | pyridoxal phosphate binding                                                                                                                                                        |
| N | B2K5L5 | DR | response to antibiotic                                                                                                                                                             |
| N | B2K5L5 | DR | transaminase activity                                                                                                                                                              |
| N | B2K6Q3 | CC | Catalyzes the transfer of a phosphate group to glutamate to form glutamate 5-phosphate which rapidly cyclizes to 5- oxoproline (By similarity).                                    |
| N | B2K6Q3 | DE | Gamma-glutamyl kinase;                                                                                                                                                             |
| N | B2K6Q3 | DE | Glutamate 5-kinase;                                                                                                                                                                |
| N | B2K6Q3 | DR | glutamate 5-kinase activity                                                                                                                                                        |
| N | B2K6Q3 | DR | proline biosynthetic process                                                                                                                                                       |
| N | B2K6T9 | CC | Bi-directionally degrades single-stranded DNA into large acid-insoluble oligonucleotides, which are then degraded further into small acid-soluble oligonucleotides (By similarity) |
| N | B2K6T9 | DE | Exodeoxyribonuclease 7 small subunit;                                                                                                                                              |
| N | B2K6T9 | DE | Exodeoxyribonuclease VII small subunit;                                                                                                                                            |
| N | B2K6T9 | DE | Exonuclease VII small subunit;                                                                                                                                                     |
| N | B2K6T9 | DR | DNA catabolic process                                                                                                                                                              |

|   |        |    |                                                                                                                                                                                                                                                              |
|---|--------|----|--------------------------------------------------------------------------------------------------------------------------------------------------------------------------------------------------------------------------------------------------------------|
| N | B2K6T9 | DR | exodeoxyribonuclease VII activity                                                                                                                                                                                                                            |
| N | B2K6V6 | CC | Involved in protein export                                                                                                                                                                                                                                   |
| N | B2K6V6 | CC | Acts as a chaperone by maintaining the newly synthesized protein in an open conformation (By similarity).                                                                                                                                                    |
| N | B2K6V6 | DE | Trigger factor;                                                                                                                                                                                                                                              |
| N | B2K6V6 | DR | cell division                                                                                                                                                                                                                                                |
| N | B2K6V6 | DR | peptidyl-prolyl cis-trans isomerase activity                                                                                                                                                                                                                 |
| N | B2K6V6 | DR | protein folding                                                                                                                                                                                                                                              |
| N | B2K6V6 | DR | protein transport                                                                                                                                                                                                                                            |
| N | B2K711 | CC | Catalyzes the 2-thiolation of uridine at the wobble position (U34) of tRNA(Lys), tRNA(Glu) and tRNA(Gln), leading to the formation of s(2)U34, the first step of tRNA-mnm(5)s(2)U34 synthesis                                                                |
| N | B2K711 | CC | Binds ATP and its substrate tRNAs (By similarity).                                                                                                                                                                                                           |
| N | B2K711 | CC | Sulfur is provided by iscS, via a sulfur-relay system                                                                                                                                                                                                        |
| N | B2K711 | DE | tRNA-specific 2-thiouridylase mnmA;                                                                                                                                                                                                                          |
| N | B2K711 | DR | tRNA processing                                                                                                                                                                                                                                              |
| N | B2K711 | DR | transferase activity                                                                                                                                                                                                                                         |
| N | B2K7Z2 | CC | Catalyzes a proton abstraction reaction that results in $\Delta^2$ -elimination of pyruvate from 2-succinyl-5-enolpyruvyl-6-hydroxy-3-cyclohexene-1-carboxylate (SEPHCHC) and the formation of 2-succinyl-6-hydroxy-2,4-cyclohexadiene-1-carboxylate (SHCHC) |
| N | B2K7Z2 | CC | Is also able to catalyze the hydrolysis of the thioester bond in palmitoyl-CoA in vitro (By similarity).                                                                                                                                                     |
| N | B2K7Z2 | DE | 2-succinyl-6-hydroxy-2,4-cyclohexadiene-1-carboxylate synthase;                                                                                                                                                                                              |
| N | B2K7Z2 | DE | SHCHC synthase;                                                                                                                                                                                                                                              |
| N | B2K7Z2 | DR | 2-succinyl-6-hydroxy-2,4-cyclohexadiene-1-carboxylate synthase activity                                                                                                                                                                                      |
| N | B2K7Z2 | DR | menaquinone biosynthetic process                                                                                                                                                                                                                             |
| N | B2KB85 | CC | Binds directly to 23S ribosomal RNA and is necessary for the in vitro assembly process of the 50S ribosomal subunit                                                                                                                                          |
| N | B2KB85 | CC | It is not involved in the protein synthesizing functions of that subunit (By similarity)                                                                                                                                                                     |
| N | B2KB85 | DE | 50S ribosomal protein L20;                                                                                                                                                                                                                                   |
| N | B2KB85 | DR | structural constituent of ribosome                                                                                                                                                                                                                           |
| N | B2LMK2 | CC | Component of the acetyl coenzyme A carboxylase (ACC) complex                                                                                                                                                                                                 |
| N | B2LMK2 | CC | Biotin carboxylase (BC) catalyzes the carboxylation of biotin on its carrier protein (BCCP) and then the CO(2) group is transferred by the transcarboxylase to acetyl-CoA to form malonyl-CoA (By similarity).                                               |
| N | B2LMK2 | DE | ACCase subunit beta;                                                                                                                                                                                                                                         |
| N | B2LMK2 | DE | Acetyl-CoA carboxylase carboxyltransferase subunit beta;                                                                                                                                                                                                     |
| N | B2LMK2 | DE | Acetyl-coenzyme A carboxylase carboxyl transferase subunit beta, chloroplastic;                                                                                                                                                                              |
| N | B2LMK2 | DR | acetyl-CoA carboxylase activity                                                                                                                                                                                                                              |
| N | B2LMK2 | DR | fatty acid biosynthetic process                                                                                                                                                                                                                              |
| N | B2LMK2 | DR | metal ion binding                                                                                                                                                                                                                                            |
| N | B2RH62 | DE | 50S ribosomal protein L32;                                                                                                                                                                                                                                   |
| N | B2RH62 | DR | structural constituent of ribosome                                                                                                                                                                                                                           |
| N | B2RIK3 | CC | Transfers the gamma-phosphate of ATP to the 4'-position of a tetraacyldisaccharide 1-phosphate intermediate (termed DS-1-P) to form tetraacyldisaccharide 1,4'-bis-phosphate (lipid IVA) (By similarity).                                                    |
| N | B2RIK3 | DE | Lipid A 4'-kinase;                                                                                                                                                                                                                                           |
| N | B2RIK3 | DE | Tetraacyldisaccharide 4'-kinase;                                                                                                                                                                                                                             |
| N | B2RIK3 | DR | lipid A biosynthetic process                                                                                                                                                                                                                                 |
| N | B2RIK3 | DR | tetraacyldisaccharide 4'-kinase activity                                                                                                                                                                                                                     |
| N | B2RIU1 | CC | Endonuclease that specifically degrades the RNA of RNA- DNA hybrids (By similarity).                                                                                                                                                                         |
| N | B2RIU1 | DE | Ribonuclease HII;                                                                                                                                                                                                                                            |
| N | B2RIU1 | DR | metal ion binding                                                                                                                                                                                                                                            |
| N | B2RIU1 | DR | ribonuclease H activity                                                                                                                                                                                                                                      |
| N | B2RLM4 | CC | Activates KDO (a required 8-carbon sugar) for incorporation into bacterial lipopolysaccharide in Gram-negative bacteria (By similarity).                                                                                                                     |
| N | B2RLM4 | DE | 3-deoxy-manno-octulosonate cytidyltransferase;                                                                                                                                                                                                               |
| N | B2RLM4 | DE | CMP-2-keto-3-deoxyoctulosonic acid synthase;                                                                                                                                                                                                                 |
| N | B2RLM4 | DE | CMP-KDO synthase;                                                                                                                                                                                                                                            |
| N | B2RLM4 | DR | 3-deoxy-manno-octulosonate cytidyltransferase activity                                                                                                                                                                                                       |
| N | B2RLM4 | DR | lipopolysaccharide biosynthetic process                                                                                                                                                                                                                      |
| N | B2RN74 | CC | Odorant receptor (Potential).                                                                                                                                                                                                                                |
| N | B2RN74 | DE | Olfactory receptor 11H12;                                                                                                                                                                                                                                    |
| N | B2RN74 | DR | olfactory receptor activity                                                                                                                                                                                                                                  |

|   |        |    |                                                                                                                                                              |
|---|--------|----|--------------------------------------------------------------------------------------------------------------------------------------------------------------|
| N | B2RN74 | DR | sensory perception of smell                                                                                                                                  |
| N | B2S1E6 | CC | Associates with free 30S ribosomal subunits (but not with 30S subunits that are part of 70S ribosomes or polysomes)                                          |
| N | B2S1E6 | CC | Essential for efficient processing of 16S rRNA                                                                                                               |
| N | B2S1E6 | CC | May interact with the 5'-terminal helix region of 16S rRNA (By similarity).                                                                                  |
| N | B2S1E6 | DE | Ribosome-binding factor A;                                                                                                                                   |
| N | B2S1E6 | DR | rRNA processing                                                                                                                                              |
| N | B2S2Y0 | DE | Protein MraZ;                                                                                                                                                |
| N | B2S673 | CC | Binds the lower part of the 30S subunit head                                                                                                                 |
| N | B2S673 | CC | Binds mRNA in the 70S ribosome, positioning it for translation (By similarity).                                                                              |
| N | B2S673 | DE | 30S ribosomal protein S3;                                                                                                                                    |
| N | B2S673 | DR | structural constituent of ribosome                                                                                                                           |
| N | B2SBF0 | CC | Catalyzes the conversion of dethiobiotin (DTB) to biotin by the insertion of a sulfur atom into dethiobiotin via a radical- based mechanism (By similarity). |
| N | B2SBF0 | DE | Biotin synthase;                                                                                                                                             |
| N | B2SBF0 | DR | 2 iron, 2 sulfur cluster binding                                                                                                                             |
| N | B2SBF0 | DR | 4 iron, 4 sulfur cluster binding                                                                                                                             |
| N | B2SBF0 | DR | biotin biosynthetic process                                                                                                                                  |
| N | B2SBF0 | DR | biotin synthase activity                                                                                                                                     |
| N | B2SBF0 | DR | metal ion binding                                                                                                                                            |
| N | B2SCP3 | CC | Catalyzes the ferrous insertion into protoporphyrin IX (By similarity).                                                                                      |
| N | B2SCP3 | DE | Ferrochelatase;                                                                                                                                              |
| N | B2SCP3 | DE | Heme synthase;                                                                                                                                               |
| N | B2SCP3 | DE | Protoheme ferro-lyase;                                                                                                                                       |
| N | B2SCP3 | DR | ferrochelatase activity                                                                                                                                      |
| N | B2SCP3 | DR | heme biosynthetic process                                                                                                                                    |
| N | B2SCP3 | DR | metal ion binding                                                                                                                                            |
| N | B2SFX1 | CC | Involved in saturated fatty acids biosynthesis (By similarity).                                                                                              |
| N | B2SFX1 | DE | (3R)-hydroxymyristoyl ACP dehydratase;                                                                                                                       |
| N | B2SFX1 | DE | (3R)-hydroxymyristoyl-[acyl-carrier-protein] dehydratase;                                                                                                    |
| N | B2SFX1 | DR | fatty acid biosynthetic process                                                                                                                              |
| N | B2SFX1 | DR | hydro-lyase activity                                                                                                                                         |
| N | B2SFX1 | DR | lipid A biosynthetic process                                                                                                                                 |
| N | B2SKA9 | CC | One of the proteins required for the normal export of preproteins out of the cell cytoplasm                                                                  |
| N | B2SKA9 | CC | It also specifically binds to its receptor secA (By similarity).                                                                                             |
| N | B2SKA9 | CC | It is a molecular chaperone that binds to a subset of precursor proteins, maintaining them in a translocation-competent state                                |
| N | B2SKA9 | DE | Protein-export protein secB;                                                                                                                                 |
| N | B2SKA9 | DR | protein tetramerization                                                                                                                                      |
| N | B2SKA9 | DR | protein transport                                                                                                                                            |
| N | B2SKA9 | DR | transmembrane transport                                                                                                                                      |
| N | B2SKA9 | DR | unfolded protein binding                                                                                                                                     |
| N | B2SQT3 | CC | One of the primary rRNA binding proteins, it binds directly to 16S rRNA where it nucleates assembly of the body of the 30S subunit (By similarity).          |
| N | B2SQT3 | DE | 30S ribosomal protein S4;                                                                                                                                    |
| N | B2SQT3 | DR | structural constituent of ribosome                                                                                                                           |
| N | B2SQZ9 | CC | Associates with the EF-Tu.GDP complex and induces the exchange of GDP to GTP                                                                                 |
| N | B2SQZ9 | CC | It remains bound to the aminoacyl-tRNA.EF- Tu.GTP complex up to the GTP hydrolysis stage on the ribosome (By similarity).                                    |
| N | B2SQZ9 | DE | Elongation factor Ts;                                                                                                                                        |
| N | B2SQZ9 | DR | translation elongation factor activity                                                                                                                       |
| N | B2T755 | CC | One of the primary rRNA binding proteins, it binds directly to 16S rRNA where it nucleates assembly of the head domain of the 30S subunit                    |
| N | B2T755 | CC | Is located at the subunit interface close to the decoding center, probably blocks exit of the E-site tRNA (By similarity).                                   |
| N | B2T755 | DE | 30S ribosomal protein S7;                                                                                                                                    |
| N | B2T755 | DR | structural constituent of ribosome                                                                                                                           |
| N | B2TCK0 | CC | Repressor involved in choline regulation of the bet genes (By similarity).                                                                                   |
| N | B2TCK0 | DE | HTH-type transcriptional regulator BetI;                                                                                                                     |
| N | B2TCK0 | DR | regulation of transcription, DNA-dependent                                                                                                                   |
| N | B2TCK0 | DR | sequence-specific DNA binding transcription factor activity                                                                                                  |
| N | B2TCK0 | DR | specific transcriptional repressor activity                                                                                                                  |
| N | B2TIC3 | CC | This protein is involved in the repair of mismatches in DNA                                                                                                  |
| N | B2TIC3 | CC | It is possible that it carries out the mismatch recognition step                                                                                             |

|   |        |    |                                                                                                                                                                                                                                                                                            |
|---|--------|----|--------------------------------------------------------------------------------------------------------------------------------------------------------------------------------------------------------------------------------------------------------------------------------------------|
| N | B2TIC3 | CC | This protein has a weak ATPase activity (By similarity).                                                                                                                                                                                                                                   |
| N | B2TIC3 | DE | DNA mismatch repair protein mutS;                                                                                                                                                                                                                                                          |
| N | B2TIC3 | DR | mismatch repair                                                                                                                                                                                                                                                                            |
| N | B2TIC3 | DR | mismatched DNA binding                                                                                                                                                                                                                                                                     |
| N | B2TJ30 | CC | An accessory protein needed during the final step in the assembly of 30S ribosomal subunit, possibly for assembly of the head region                                                                                                                                                       |
| N | B2TJ30 | CC | Essential for efficient processing of 16S rRNA                                                                                                                                                                                                                                             |
| N | B2TJ30 | CC | It has affinity for free ribosomal 30S subunits but not for 70S ribosomes (By similarity)                                                                                                                                                                                                  |
| N | B2TJ30 | CC | May be needed both before and after rbfA during the maturation of 16S rRNA                                                                                                                                                                                                                 |
| N | B2TJ30 | CC | Probably interacts with S19                                                                                                                                                                                                                                                                |
| N | B2TJ30 | DE | Ribosome maturation factor rimM;                                                                                                                                                                                                                                                           |
| N | B2TJ30 | DR | rRNA processing                                                                                                                                                                                                                                                                            |
| N | B2TJ30 | DR | ribosome binding                                                                                                                                                                                                                                                                           |
| N | B2TTK3 | DE | UPF0502 protein yceH;                                                                                                                                                                                                                                                                      |
| N | B2TU77 | DE | Leucine--tRNA ligase;                                                                                                                                                                                                                                                                      |
| N | B2TU77 | DE | Leucyl-tRNA synthetase;                                                                                                                                                                                                                                                                    |
| N | B2TU77 | DR | leucine-tRNA ligase activity                                                                                                                                                                                                                                                               |
| N | B2TU77 | DR | leucyl-tRNA aminoacylation                                                                                                                                                                                                                                                                 |
| N | B2U3C0 | DE | NH(3)-dependent NAD(+) synthetase;                                                                                                                                                                                                                                                         |
| N | B2U3C0 | DR | NAD biosynthetic process                                                                                                                                                                                                                                                                   |
| N | B2U3C0 | DR | NAD+ synthase (glutamine-hydrolyzing) activity                                                                                                                                                                                                                                             |
| N | B2U3C0 | DR | NAD+ synthase activity                                                                                                                                                                                                                                                                     |
| N | B2U3M8 | CC | Catalyzes the conversion of 3'-phosphate to a 2',3'- cyclic phosphodiester at the end of RNA                                                                                                                                                                                               |
| N | B2U3M8 | CC | The biological role of this enzyme is unknown but it is likely to function in some aspects of cellular RNA processing (By similarity).                                                                                                                                                     |
| N | B2U3M8 | CC | The mechanism of action of the enzyme occurs in 3 steps: (A) adenylation of the enzyme by ATP; (B) transfer of adenylate to an RNA-N3'P to produce RNA-N3'PP5'A; (C) and attack of the adjacent 2'-hydroxyl on the 3'- phosphorus in the diester linkage to produce the cyclic end product |
| N | B2U3M8 | DE | RNA 3'-terminal phosphate cyclase;                                                                                                                                                                                                                                                         |
| N | B2U3M8 | DE | RNA cyclase;                                                                                                                                                                                                                                                                               |
| N | B2U3M8 | DE | RNA-3'-phosphate cyclase;                                                                                                                                                                                                                                                                  |
| N | B2U3M8 | DR | RNA processing                                                                                                                                                                                                                                                                             |
| N | B2U3M8 | DR | RNA-3'-phosphate cyclase activity                                                                                                                                                                                                                                                          |
| N | B2UAK3 | CC | Transfers the N-acyl diglyceride group on what will become the N-terminal cysteine of membrane lipoproteins (By similarity).                                                                                                                                                               |
| N | B2UAK3 | DE | Prolipoprotein diacylglyceryl transferase;                                                                                                                                                                                                                                                 |
| N | B2UAK3 | DR | lipoprotein biosynthetic process                                                                                                                                                                                                                                                           |
| N | B2UAK3 | DR | protein lipoylation                                                                                                                                                                                                                                                                        |
| N | B2UAK3 | DR | transferase activity, transferring glycosyl groups                                                                                                                                                                                                                                         |
| N | B2UB00 | CC | DNA ligase that catalyzes the formation of phosphodiester linkages between 5'-phosphoryl and 3'-hydroxyl groups in double-stranded DNA using NAD as a coenzyme and as the energy source for the reaction                                                                                   |
| N | B2UB00 | CC | It is essential for DNA replication and repair of damaged DNA (By similarity).                                                                                                                                                                                                             |
| N | B2UB00 | DE | Polydeoxyribonucleotide synthase [NAD+];                                                                                                                                                                                                                                                   |
| N | B2UB00 | DR | DNA ligase (NAD+) activity                                                                                                                                                                                                                                                                 |
| N | B2UB00 | DR | DNA replication                                                                                                                                                                                                                                                                            |
| N | B2UB00 | DR | metal ion binding                                                                                                                                                                                                                                                                          |
| N | B2UTS1 | CC | Component of the acetyl coenzyme A carboxylase (ACC) complex                                                                                                                                                                                                                               |
| N | B2UTS1 | CC | First, biotin carboxylase catalyzes the carboxylation of biotin on its carrier protein (BCCP) and then the CO(2) group is transferred by the carboxyltransferase to acetyl-CoA to form malonyl-CoA (By similarity).                                                                        |
| N | B2UTS1 | DE | ACCase subunit alpha;                                                                                                                                                                                                                                                                      |
| N | B2UTS1 | DE | Acetyl-CoA carboxylase carboxyltransferase subunit alpha;                                                                                                                                                                                                                                  |
| N | B2UTS1 | DE | Acetyl-coenzyme A carboxylase carboxyl transferase subunit alpha;                                                                                                                                                                                                                          |
| N | B2UTS1 | DR | acetyl-CoA carboxylase activity                                                                                                                                                                                                                                                            |
| N | B2UTS1 | DR | fatty acid biosynthetic process                                                                                                                                                                                                                                                            |
| N | B2UUI8 | DE | Deoxycytidine triphosphate deaminase;                                                                                                                                                                                                                                                      |
| N | B2UUI8 | DE | dCTP deaminase;                                                                                                                                                                                                                                                                            |
| N | B2UUI8 | DR | dCTP deaminase activity                                                                                                                                                                                                                                                                    |
| N | B2UUI8 | DR | dUTP biosynthetic process                                                                                                                                                                                                                                                                  |
| N | B2UXE0 | CC | Joins Ado-cobinamide-GDP and alpha-ribazole to generate adenosylcobalamin (Ado-cobalamin) (By similarity).                                                                                                                                                                                 |
| N | B2UXE0 | DE | Cobalamin synthase;                                                                                                                                                                                                                                                                        |

|   |        |    |                                                                                                                                                                               |
|---|--------|----|-------------------------------------------------------------------------------------------------------------------------------------------------------------------------------|
| N | B2UXE0 | DR | cobalamin 5'-phosphate synthase activity                                                                                                                                      |
| N | B2UXE0 | DR | cobalamin biosynthetic process                                                                                                                                                |
| N | B2UY33 | CC | Cell wall formation (By similarity).                                                                                                                                          |
| N | B2UY33 | DE | D-Ala-D-Ala ligase;                                                                                                                                                           |
| N | B2UY33 | DE | D-alanine--D-alanine ligase;                                                                                                                                                  |
| N | B2UY33 | DE | D-alanylalanine synthetase;                                                                                                                                                   |
| N | B2UY33 | DR | D-alanine-D-alanine ligase activity                                                                                                                                           |
| N | B2UY33 | DR | cellular cell wall organization                                                                                                                                               |
| N | B2UY33 | DR | metal ion binding                                                                                                                                                             |
| N | B2UY33 | DR | peptidoglycan biosynthetic process                                                                                                                                            |
| N | B2UY33 | DR | regulation of cell shape                                                                                                                                                      |
| N | B2V0J5 | CC | Phosphotransfer between the C1 and C5 carbon atoms of pentose (By similarity).                                                                                                |
| N | B2V0J5 | DE | Phosphodeoxyribomutase;                                                                                                                                                       |
| N | B2V0J5 | DE | Phosphopentomutase;                                                                                                                                                           |
| N | B2V0J5 | DR | cellular metabolic compound salvage                                                                                                                                           |
| N | B2V0J5 | DR | magnesium ion binding                                                                                                                                                         |
| N | B2V0J5 | DR | nucleotide metabolic process                                                                                                                                                  |
| N | B2V0J5 | DR | phosphopentomutase activity                                                                                                                                                   |
| N | B2V1U8 | CC | Specifically methylates the 167 position of a guanosine in 16S rRNA (By similarity).                                                                                          |
| N | B2V1U8 | DE | 16S rRNA 7-methylguanosine methyltransferase;                                                                                                                                 |
| N | B2V1U8 | DE | 16S rRNA m7G methyltransferase;                                                                                                                                               |
| N | B2V1U8 | DE | Ribosomal RNA small subunit methyltransferase G;                                                                                                                              |
| N | B2V1U8 | DR | rRNA methyltransferase activity                                                                                                                                               |
| N | B2V4F7 | CC | Responsible for the release of ribosomes from messenger RNA at the termination of protein biosynthesis                                                                        |
| N | B2V4F7 | CC | May increase the efficiency of translation by recycling ribosomes from one round of translation to another (By similarity).                                                   |
| N | B2V4F7 | DE | Ribosome-recycling factor;                                                                                                                                                    |
| N | B2V4F7 | DE | Ribosome-releasing factor;                                                                                                                                                    |
| N | B2V5E8 | CC | Modulates recA activity (By similarity).                                                                                                                                      |
| N | B2V5E8 | DE | Regulatory protein recX;                                                                                                                                                      |
| N | B2V5E8 | DR | regulation of DNA repair                                                                                                                                                      |
| N | B2V7J9 | CC | One of the primary rRNA binding proteins, it binds directly to 16S rRNA central domain where it helps coordinate assembly of the platform of the 30S subunit (By similarity). |
| N | B2V7J9 | DE | 30S ribosomal protein S8;                                                                                                                                                     |
| N | B2V7J9 | DR | structural constituent of ribosome                                                                                                                                            |
| N | B2VDY7 | CC | H(+)-stimulated, highly selective, manganese uptake system (By similarity).                                                                                                   |
| N | B2VDY7 | DE | Probable manganese transport protein mntH;                                                                                                                                    |
| N | B2VDY7 | DR | symporter activity                                                                                                                                                            |
| N | B2VE12 | CC | Catalyzes the NADP-dependent rearrangement and reduction of 1-deoxy-D-xylulose-5-phosphate (DXP) to 2-C-methyl-D-erythritol 4-phosphate (MEP) (By similarity).                |
| N | B2VE12 | DE | 1-deoxy-D-xylulose 5-phosphate reductoisomerase;                                                                                                                              |
| N | B2VE12 | DE | 1-deoxyxylulose-5-phosphate reductoisomerase;                                                                                                                                 |
| N | B2VE12 | DE | 2-C-methyl-D-erythritol 4-phosphate synthase;                                                                                                                                 |
| N | B2VE12 | DE | DXP reductoisomerase;                                                                                                                                                         |
| N | B2VE12 | DR | 1-deoxy-D-xylulose-5-phosphate reductoisomerase activity                                                                                                                      |
| N | B2VE12 | DR | isoprenoid biosynthetic process                                                                                                                                               |
| N | B2VE12 | DR | metal ion binding                                                                                                                                                             |
| N | B2VE12 | DR | oxidation-reduction process                                                                                                                                                   |
| N | B2VFE0 | CC | Catalyzes the final step of fatty acid oxidation in which acetyl-CoA is released and the CoA ester of a fatty acid two carbons shorter is formed (By similarity).             |
| N | B2VFE0 | DE | 3-ketoacyl-CoA thiolase;                                                                                                                                                      |
| N | B2VFE0 | DE | Acetyl-CoA acyltransferase;                                                                                                                                                   |
| N | B2VFE0 | DE | Beta-ketothiolase;                                                                                                                                                            |
| N | B2VFE0 | DE | Fatty acid oxidation complex subunit beta;                                                                                                                                    |
| N | B2VFE0 | DR | acetyl-CoA C-acyltransferase activity                                                                                                                                         |
| N | B2VFE0 | DR | fatty acid metabolic process                                                                                                                                                  |
| N | B2VFE0 | DR | lipid catabolic process                                                                                                                                                       |
| N | B2VIS3 | DE | UPF0345 protein ETA_25560;                                                                                                                                                    |
| N | B2VVB9 | CC | Component of the ERMES/MDM complex, which serves as a molecular tether to connect the endoplasmic reticulum and mitochondria                                                  |
| N | B2VVB9 | CC | Components of this complex are involved in the control of mitochondrial shape and protein biogenesis and may function in phospholipid exchange                                |
| N | B2VVB9 | CC | Essential for establishing and maintaining the structure of mitochondria and maintenance of mtDNA nucleoids (By similarity).                                                  |



|   |        |    |                                                                                                                                                                                                                                                                                                                                           |
|---|--------|----|-------------------------------------------------------------------------------------------------------------------------------------------------------------------------------------------------------------------------------------------------------------------------------------------------------------------------------------------|
| N | B2VVB9 | CC | The mdm10-mdm12-mmm1 subcomplex further acts in the TOM40-specific pathway after the action of the mdm12-mmm1 complex                                                                                                                                                                                                                     |
| N | B2VVB9 | CC | The mdm12-mmm1 subcomplex functions in the major beta-barrel assembly pathway that is responsible for biogenesis of all outer membrane beta-barrel proteins, and acts in a late step after the SAM complex                                                                                                                                |
| N | B2VVB9 | DE | Maintenance of mitochondrial morphology protein 1;                                                                                                                                                                                                                                                                                        |
| N | B2W791 | CC | Cleaves beta-linked terminal galactosyl residues from gangliosides, glycoproteins, and glycosaminoglycans (By similarity).                                                                                                                                                                                                                |
| N | B2W791 | DE | Probable beta-galactosidase B;                                                                                                                                                                                                                                                                                                            |
| N | B2W791 | DR | beta-galactosidase activity                                                                                                                                                                                                                                                                                                               |
| N | B2W791 | DR | cation binding                                                                                                                                                                                                                                                                                                                            |
| N | B2W791 | DR | polysaccharide catabolic process                                                                                                                                                                                                                                                                                                          |
| N | B2XWJ4 | CC | NDH shuttles electrons from NAD(P)H:plastoquinone, via FMN and iron-sulfur (Fe-S) centers, to quinones in the photosynthetic chain and possibly in a chloroplast respiratory chain                                                                                                                                                        |
| N | B2XWJ4 | CC | Couples the redox reaction to proton translocation, and thus conserves the redox energy in a proton gradient (By similarity).                                                                                                                                                                                                             |
| N | B2XWJ4 | CC | The immediate electron acceptor for the enzyme in this species is believed to be plastoquinone                                                                                                                                                                                                                                            |
| N | B2XWJ4 | DE | NAD(P)H dehydrogenase subunit 6;                                                                                                                                                                                                                                                                                                          |
| N | B2XWJ4 | DE | NAD(P)H-quinone oxidoreductase subunit 6, chloroplastic;                                                                                                                                                                                                                                                                                  |
| N | B2XWJ4 | DE | NADH-plastoquinone oxidoreductase subunit 6;                                                                                                                                                                                                                                                                                              |
| N | B2XWJ4 | DR | NADH dehydrogenase (ubiquinone) activity                                                                                                                                                                                                                                                                                                  |
| N | B2XWJ4 | DR | oxidation-reduction process                                                                                                                                                                                                                                                                                                               |
| N | B2XWJ4 | DR | quinone binding                                                                                                                                                                                                                                                                                                                           |
| N | B3CN07 | CC | Nuclease that resolves Holliday junction intermediates in genetic recombination Cleaves the cruciform structure in supercoiled DNA by nicking to strands with the same polarity at sites symmetrically opposed at the junction in the homologous arms and leaves a 5'-terminal phosphate and a 3'-terminal hydroxyl group (By similarity) |
| N | B3CN07 | CC |                                                                                                                                                                                                                                                                                                                                           |
| N | B3CN07 | DE | Crossover junction endodeoxyribonuclease ruvC;                                                                                                                                                                                                                                                                                            |
| N | B3CN07 | DE | Holliday junction nuclease ruvC;                                                                                                                                                                                                                                                                                                          |
| N | B3CN07 | DE | Holliday junction resolvase ruvC;                                                                                                                                                                                                                                                                                                         |
| N | B3CN07 | DR | DNA recombination                                                                                                                                                                                                                                                                                                                         |
| N | B3CN07 | DR | crossover junction endodeoxyribonuclease activity                                                                                                                                                                                                                                                                                         |
| N | B3CN07 | DR | metal ion binding                                                                                                                                                                                                                                                                                                                         |
| N | B3CN07 | DR | nucleic acid binding                                                                                                                                                                                                                                                                                                                      |
| N | B3CVD8 | CC | Specifically methylates the N4 position of cytidine in position 1402 (C1402) of 16S rRNA (By similarity).                                                                                                                                                                                                                                 |
| N | B3CVD8 | DE | 16S rRNA m(4)C1402 methyltransferase;                                                                                                                                                                                                                                                                                                     |
| N | B3CVD8 | DE | Ribosomal RNA small subunit methyltransferase H;                                                                                                                                                                                                                                                                                          |
| N | B3CVD8 | DE | rRNA (cytosine-N(4)-)-methyltransferase RsmH;                                                                                                                                                                                                                                                                                             |
| N | B3CVD8 | DR | methyltransferase activity                                                                                                                                                                                                                                                                                                                |
| N | B3CVD8 | DR | rRNA processing                                                                                                                                                                                                                                                                                                                           |
| N | B3DPH5 | CC | Catalyzes the conversion of uracil and 5-phospho-alpha- D-ribose 1-diphosphate (PRPP) to UMP and diphosphate (By similarity).                                                                                                                                                                                                             |
| N | B3DPH5 | DE | UMP pyrophosphorylase;                                                                                                                                                                                                                                                                                                                    |
| N | B3DPH5 | DE | Uracil phosphoribosyltransferase;                                                                                                                                                                                                                                                                                                         |
| N | B3DPH5 | DR | nucleoside metabolic process                                                                                                                                                                                                                                                                                                              |
| N | B3DPH5 | DR | phosphotransferase activity, alcohol group as acceptor                                                                                                                                                                                                                                                                                    |
| N | B3DPH5 | DR | uracil phosphoribosyltransferase activity                                                                                                                                                                                                                                                                                                 |
| N | B3DPH5 | DR | uracil salvage                                                                                                                                                                                                                                                                                                                            |
| N | B3DPY3 | CC | Binds to Cpn60 in the presence of Mg-ATP and suppresses the ATPase activity of the latter (By similarity).                                                                                                                                                                                                                                |
| N | B3DPY3 | DE | 10 kDa chaperonin;                                                                                                                                                                                                                                                                                                                        |
| N | B3DPY3 | DE | GroES protein;                                                                                                                                                                                                                                                                                                                            |
| N | B3DPY3 | DE | Protein Cpn10;                                                                                                                                                                                                                                                                                                                            |
| N | B3DPY3 | DR | protein folding                                                                                                                                                                                                                                                                                                                           |
| N | B3DQG7 | CC | Catalyzes the attachment of serine to tRNA(Ser)                                                                                                                                                                                                                                                                                           |
| N | B3DQG7 | CC | Is also able to aminoacylate tRNA(Sec) with serine, to form the misacylated tRNA L-seryl-tRNA(Sec), which will be further converted into selenocysteinyl-tRNA(Sec) (By similarity).                                                                                                                                                       |
| N | B3DQG7 | DE | Serine--tRNA ligase;                                                                                                                                                                                                                                                                                                                      |
| N | B3DQG7 | DE | Seryl-tRNA synthetase;                                                                                                                                                                                                                                                                                                                    |
| N | B3DQG7 | DE | Seryl-tRNA(Ser/Sec) synthetase;                                                                                                                                                                                                                                                                                                           |
| N | B3DQG7 | DR | serine-tRNA ligase activity                                                                                                                                                                                                                                                                                                               |

|   |        |    |                                                                                                                                                                                                                                                                 |
|---|--------|----|-----------------------------------------------------------------------------------------------------------------------------------------------------------------------------------------------------------------------------------------------------------------|
| N | B3DQG7 | DR | seryl-tRNA aminoacylation                                                                                                                                                                                                                                       |
| N | B3DU87 | CC | Catalyzes the attachment of glutamate to tRNA(Glu) in a two-step reaction: glutamate is first activated by ATP to form Glu-AMP and then transferred to the acceptor end of tRNA(Glu) (By similarity).                                                           |
| N | B3DU87 | DE | Glutamate--tRNA ligase;                                                                                                                                                                                                                                         |
| N | B3DU87 | DE | Glutamyl-tRNA synthetase;                                                                                                                                                                                                                                       |
| N | B3DU87 | DR | glutamate-tRNA ligase activity                                                                                                                                                                                                                                  |
| N | B3DU87 | DR | glutamyl-tRNA aminoacylation                                                                                                                                                                                                                                    |
| N | B3E045 | DE | UPF0082 protein Minf_0651;                                                                                                                                                                                                                                      |
| N | B3E849 | CC | Binds to the 23S rRNA (By similarity).                                                                                                                                                                                                                          |
| N | B3E849 | DE | 50S ribosomal protein L15;                                                                                                                                                                                                                                      |
| N | B3E849 | DR | structural constituent of ribosome                                                                                                                                                                                                                              |
| N | B3EAE4 | CC | Required for maturation of 30S ribosomal subunits (By similarity).                                                                                                                                                                                              |
| N | B3EAE4 | DE | Ribosome maturation factor rimP;                                                                                                                                                                                                                                |
| N | B3EAE4 | DR | ribosome biogenesis<br>is required not only for elongation of protein synthesis but also for the initiation                                                                                                                                                     |
| N | B3ECI3 | CC | of all mRNA translation through initiator tRNA(fMet) aminoacylation (By<br>similarity)                                                                                                                                                                          |
| N | B3ECI3 | DE | Methionine--tRNA ligase;                                                                                                                                                                                                                                        |
| N | B3ECI3 | DE | Methionyl-tRNA synthetase;                                                                                                                                                                                                                                      |
| N | B3ECI3 | DR | metal ion binding                                                                                                                                                                                                                                               |
| N | B3ECI3 | DR | methionine-tRNA ligase activity                                                                                                                                                                                                                                 |
| N | B3ECI3 | DR | methionyl-tRNA aminoacylation                                                                                                                                                                                                                                   |
| N | B3EG23 | CC | Transfers the gamma-phosphate of ATP to the 4'-position of a<br>tetraacyldisaccharide 1-phosphate intermediate (termed DS-1- P) to form<br>tetraacyldisaccharide 1,4'-bis-phosphate (lipid IVA) (By similarity).                                                |
| N | B3EG23 | DE | Lipid A 4'-kinase;                                                                                                                                                                                                                                              |
| N | B3EG23 | DE | Tetraacyldisaccharide 4'-kinase;                                                                                                                                                                                                                                |
| N | B3EG23 | DR | lipid A biosynthetic process                                                                                                                                                                                                                                    |
| N | B3EG23 | DR | tetraacyldisaccharide 4'-kinase activity<br>required for the formation of a threonylcarbamoyl group on adenosine at                                                                                                                                             |
| N | B3EHF8 | CC | position 37 (t(6)A37) in tRNAs that read codons beginning with adenine (By<br>similarity)                                                                                                                                                                       |
| N | B3EHF8 | DE | Probable tRNA threonylcarbamoyladenine biosynthesis protein Gcp;                                                                                                                                                                                                |
| N | B3EHF8 | DE | t(6)A37 threonylcarbamoyladenine biosynthesis protein;                                                                                                                                                                                                          |
| N | B3EHF8 | DR | metal ion binding                                                                                                                                                                                                                                               |
| N | B3EHF8 | DR | metalloendopeptidase activity                                                                                                                                                                                                                                   |
| N | B3ELU5 | CC | Catalyzes the dephosphorylation of undecaprenyl diphosphate (UPP)                                                                                                                                                                                               |
| N | B3ELU5 | CC | Confers resistance to bacitracin (By similarity).                                                                                                                                                                                                               |
| N | B3ELU5 | DE | Bacitracin resistance protein;                                                                                                                                                                                                                                  |
| N | B3ELU5 | DE | Undecaprenyl pyrophosphate phosphatase;                                                                                                                                                                                                                         |
| N | B3ELU5 | DE | Undecaprenyl-diphosphatase;                                                                                                                                                                                                                                     |
| N | B3ELU5 | DR | cellular cell wall organization                                                                                                                                                                                                                                 |
| N | B3ELU5 | DR | dephosphorylation                                                                                                                                                                                                                                               |
| N | B3ELU5 | DR | peptidoglycan biosynthetic process                                                                                                                                                                                                                              |
| N | B3ELU5 | DR | regulation of cell shape                                                                                                                                                                                                                                        |
| N | B3ELU5 | DR | response to antibiotic                                                                                                                                                                                                                                          |
| N | B3ELU5 | DR | undecaprenyl-diphosphatase activity                                                                                                                                                                                                                             |
| N | B3EQD1 | DE | Phosphoglycerate kinase;                                                                                                                                                                                                                                        |
| N | B3EQD1 | DR | phosphoglycerate kinase activity                                                                                                                                                                                                                                |
| N | B3GXD4 | DE | 3-phosphoshikimate 1-carboxyvinyltransferase;                                                                                                                                                                                                                   |
| N | B3GXD4 | DE | 5-enolpyruvylshikimate-3-phosphate synthase;                                                                                                                                                                                                                    |
| N | B3GXD4 | DE | EPSP synthase;                                                                                                                                                                                                                                                  |
| N | B3GXD4 | DR | 3-phosphoshikimate 1-carboxyvinyltransferase activity                                                                                                                                                                                                           |
| N | B3GXD4 | DR | aromatic amino acid family biosynthetic process                                                                                                                                                                                                                 |
| N | B3GY39 | DE | UPF0082 protein APP7_1210;                                                                                                                                                                                                                                      |
| N | B3GZK8 | CC | Cell wall formation<br>Catalyzes the transfer of a GlcNAc subunit on undecaprenyl-pyrophosphoryl-<br>MurNAc-pentapeptide (lipid intermediate I) to form undecaprenyl-<br>pyrophosphoryl-MurNAc- (pentapeptide)GlcNAc (lipid intermediate II) (By<br>similarity) |
| N | B3GZK8 | DE | UDP-N-acetylglucosamine--N-acetylmuramyl-(pentapeptide) pyrophosphoryl-<br>undecaprenol N-acetylglucosamine transferase;                                                                                                                                        |
| N | B3GZK8 | DE | Undecaprenyl-PP-MurNAc-pentapeptide-UDPGlcNAc GlcNAc transferase;                                                                                                                                                                                               |
| N | B3GZK8 | DR | UDP-N-acetyl-D-glucosamine:N-acetylmuramoyl-L-alanyl-D-glutamyl-meso-<br>2,6-diaminopimelyl-D-alanyl-D-alanine-diphosphoundecaprenol 4-beta-N-<br>acetylglucosaminyltransferase activity                                                                        |
| N | B3GZK8 | DR | UDP-N-acetylglactosamine biosynthetic process                                                                                                                                                                                                                   |

|   |        |    |                                                                                                                                                                              |
|---|--------|----|------------------------------------------------------------------------------------------------------------------------------------------------------------------------------|
| N | B3GZK8 | DR | carbohydrate binding                                                                                                                                                         |
| N | B3GZK8 | DR | cell division                                                                                                                                                                |
| N | B3GZK8 | DR | cellular cell wall organization                                                                                                                                              |
| N | B3GZK8 | DR | lipid glycosylation                                                                                                                                                          |
| N | B3GZK8 | DR | peptidoglycan biosynthetic process                                                                                                                                           |
| N | B3GZK8 | DR | regulation of cell shape                                                                                                                                                     |
| N | B3GZK8 | DR | undecaprenyldiphospho-muramoylpentapeptide beta-N-acetylglucosaminyltransferase activity                                                                                     |
| N | B3H268 | CC | Regulates arginine biosynthesis genes (By similarity).                                                                                                                       |
| N | B3H268 | DE | Arginine repressor;                                                                                                                                                          |
| N | B3H268 | DR | arginine biosynthetic process                                                                                                                                                |
| N | B3H268 | DR | regulation of transcription, DNA-dependent                                                                                                                                   |
| N | B3H268 | DR | sequence-specific DNA binding transcription factor activity                                                                                                                  |
| N | B3H2L4 | DE | Urea amidohydrolase subunit beta;                                                                                                                                            |
| N | B3H2L4 | DE | Urease subunit beta;                                                                                                                                                         |
| N | B3H2L4 | DR | nickel ion binding                                                                                                                                                           |
| N | B3H2L4 | DR | nitrogen compound metabolic process                                                                                                                                          |
| N | B3H2L4 | DR | urease activity                                                                                                                                                              |
| N | B3LS11 | CC | Is probably involved in a pathway contributing to genomic integrity.                                                                                                         |
| N | B3LS11 | DE | Increased recombination centers protein 22;                                                                                                                                  |
| N | B3LUP1 | CC | May be involved in the modulation of rDNA transcription (By similarity).                                                                                                     |
| N | B3LUP1 | DE | Regulator of rDNA transcription protein 5;                                                                                                                                   |
| N | B3LUP1 | DR | nucleotide binding                                                                                                                                                           |
| N | B3MMA5 | CC | Involved in mitotic DNA repair and meiotic recombination                                                                                                                     |
| N | B3MMA5 | CC | Essential for interhomolog gene conversion (GC), but may have a less important role in intersister GC than spn-A/Rad51                                                       |
| N | B3MMA5 | CC | Functions in the recombinational DNA repair pathway                                                                                                                          |
| N | B3MMA5 | CC | In the presence of DNA, spn-A/Rad51 enhances the ATPase activity of okr/Rad54 (By similarity).                                                                               |
| N | B3MMA5 | DE | DNA repair and recombination protein RAD54-like;                                                                                                                             |
| N | B3MMA5 | DE | Protein okra;                                                                                                                                                                |
| N | B3MMA5 | DR | DNA synthesis involved in double-strand break repair via homologous recombination                                                                                            |
| N | B3MMA5 | DR | cell division                                                                                                                                                                |
| N | B3MMA5 | DR | chromatin remodeling                                                                                                                                                         |
| N | B3MMA5 | DR | helicase activity                                                                                                                                                            |
| N | B3MMA5 | DR | meiotic DNA repair synthesis                                                                                                                                                 |
| N | B3MMA5 | DR | response to ionizing radiation                                                                                                                                               |
| N | B3PC22 | CC | Catalyzes the ATP-dependent conversion of 7-carboxy-7-deazaguanine (CDG) to 7-cyano-7-deazaguanine (preQ(0)) (By similarity).                                                |
| N | B3PC22 | DE | 7-cyano-7-carbaguanine synthase;                                                                                                                                             |
| N | B3PC22 | DE | 7-cyano-7-deazaguanine synthase;                                                                                                                                             |
| N | B3PC22 | DE | PreQ(0) synthase;                                                                                                                                                            |
| N | B3PC22 | DE | Queuosine biosynthesis protein queC;                                                                                                                                         |
| N | B3PC22 | DR | arginine biosynthetic process                                                                                                                                                |
| N | B3PC22 | DR | argininosuccinate synthase activity                                                                                                                                          |
| N | B3PC22 | DR | metal ion binding                                                                                                                                                            |
| N | B3PC22 | DR | queuosine biosynthetic process                                                                                                                                               |
| N | B3PFK3 | DE | Homoserine O-acetyltransferase;                                                                                                                                              |
| N | B3PFK3 | DE | Homoserine O-trans-acetylase;                                                                                                                                                |
| N | B3PFK3 | DE | Homoserine transacetylase;                                                                                                                                                   |
| N | B3PFK3 | DR | homoserine O-acetyltransferase activity                                                                                                                                      |
| N | B3PFK3 | DR | methionine biosynthetic process                                                                                                                                              |
| N | B3PHF4 | DE | 5-enolpyruvylshikimate-3-phosphate phospholyase;                                                                                                                             |
| N | B3PHF4 | DE | Chorismate synthase;                                                                                                                                                         |
| N | B3PHF4 | DR | aromatic amino acid family biosynthetic process                                                                                                                              |
| N | B3PHF4 | DR | chorismate synthase activity                                                                                                                                                 |
| N | B3PWT5 | CC | One of the primary rRNA binding proteins, it binds directly to 16S rRNA central domain where it helps coordinate assembly of the platform of the 30S subunit (By similarity) |
| N | B3PWT5 | DE | 30S ribosomal protein S8;                                                                                                                                                    |
| N | B3PWT5 | DR | structural constituent of ribosome                                                                                                                                           |
| N | B3QS41 | CC | Catalyzes the reversible transfer of the terminal phosphate group between ATP and AMP                                                                                        |
| N | B3QS41 | CC | This small ubiquitous enzyme involved in the energy metabolism and nucleotide synthesis, is essential for maintenance and cell growth (By similarity).                       |
| N | B3QS41 | DE | ATP-AMP transphosphorylase;                                                                                                                                                  |

|   |        |    |                                                                                                                                                                                                       |
|---|--------|----|-------------------------------------------------------------------------------------------------------------------------------------------------------------------------------------------------------|
| N | B3QS41 | DE | Adenylate kinase;                                                                                                                                                                                     |
| N | B3QS41 | DR | adenylate kinase activity                                                                                                                                                                             |
| N | B3QS41 | DR | nucleotide biosynthetic process                                                                                                                                                                       |
| N | B3QTQ3 | CC | Catalyzes the pyruvoyl-dependent decarboxylation of aspartate to produce beta-alanine (By similarity).                                                                                                |
| N | B3QTQ3 | DE | Aspartate 1-decarboxylase alpha chain;                                                                                                                                                                |
| N | B3QTQ3 | DE | Aspartate 1-decarboxylase beta chain;                                                                                                                                                                 |
| N | B3QTQ3 | DE | Aspartate 1-decarboxylase;                                                                                                                                                                            |
| N | B3QTQ3 | DE | Aspartate alpha-decarboxylase;                                                                                                                                                                        |
| N | B3QTQ3 | DR | alanine biosynthetic process                                                                                                                                                                          |
| N | B3QTQ3 | DR | aspartate 1-decarboxylase activity                                                                                                                                                                    |
| N | B3QTQ3 | DR | pantothenate biosynthetic process                                                                                                                                                                     |
| N | B3QY23 | CC | Involved in the binding of tRNA to the ribosomes (By similarity).                                                                                                                                     |
| N | B3QY23 | DE | 30S ribosomal protein S10;                                                                                                                                                                            |
| N | B3QY23 | DR | structural constituent of ribosome                                                                                                                                                                    |
| N | B3QYE2 | DE | 50S ribosomal protein L30;                                                                                                                                                                            |
| N | B3QYE2 | DR | structural constituent of ribosome                                                                                                                                                                    |
| N | B3QYR1 | CC | Catalyzes the attachment of glutamate to tRNA(Glu) in a two-step reaction: glutamate is first activated by ATP to form Glu-AMP and then transferred to the acceptor end of tRNA(Glu) (By similarity). |
| N | B3QYR1 | DE | Glutamate--tRNA ligase;                                                                                                                                                                               |
| N | B3QYR1 | DE | Glutamyl-tRNA synthetase;                                                                                                                                                                             |
| N | B3QYR1 | DR | glutamate-tRNA ligase activity                                                                                                                                                                        |
| N | B3QYR1 | DR | glutamyl-tRNA aminoacylation                                                                                                                                                                          |
| N | B3QZH3 | CC | One of the primary rRNA binding proteins, it binds directly to 16S rRNA where it nucleates assembly of the head domain of the 30S subunit                                                             |
| N | B3QZH3 | CC | Is located at the subunit interface close to the decoding center, probably blocks exit of the E-site tRNA (By similarity).                                                                            |
| N | B3QZH3 | DE | 30S ribosomal protein S7;                                                                                                                                                                             |
| N | B3QZH3 | DR | structural constituent of ribosome                                                                                                                                                                    |
| N | B3R0K3 | CC | Binds together with S18 to 16S ribosomal RNA (By similarity).                                                                                                                                         |
| N | B3R0K3 | DE | 30S ribosomal protein S6;                                                                                                                                                                             |
| N | B3R0K3 | DR | structural constituent of ribosome                                                                                                                                                                    |
| N | B3R7L6 | CC | PRODUCES ATP FROM ADP IN THE PRESENCE OF A PROTON GRADIENT ACROSS THE MEMBRANE                                                                                                                        |
| N | B3R7L6 | CC | The gamma chain is believed to be important in regulating ATPase activity and the flow of protons through the CF(0) complex (By similarity).                                                          |
| N | B3R7L6 | DE | ATP synthase F1 sector gamma subunit;                                                                                                                                                                 |
| N | B3R7L6 | DE | ATP synthase gamma chain;                                                                                                                                                                             |
| N | B3R7L6 | DE | F-ATPase gamma subunit;                                                                                                                                                                               |
| N | B3R7L6 | DR | ATP synthesis coupled proton transport                                                                                                                                                                |
| N | B3R7L6 | DR | hydrogen ion transporting ATP synthase activity, rotational mechanism                                                                                                                                 |
| N | B3R7L6 | DR | proton-transporting ATPase activity, rotational mechanism                                                                                                                                             |
| N | B3RLE6 | CC | Catalyzes the interconversion of methylthioribose-1- phosphate (MTR-1-P) into methylthioribulose-1-phosphate (MTRu-1-P) (By similarity).                                                              |
| N | B3RLE6 | DE | MTR-1-P isomerase;                                                                                                                                                                                    |
| N | B3RLE6 | DE | Methylthioribose-1-phosphate isomerase;                                                                                                                                                               |
| N | B3RLE6 | DE | S-methyl-5-thioribose-1-phosphate isomerase;                                                                                                                                                          |
| N | B3RLE6 | DE | Translation initiation factor eIF-2B subunit alpha/beta/delta-like protein;                                                                                                                           |
| N | B3RLE6 | DR | S-methyl-5-thioribose-1-phosphate isomerase activity                                                                                                                                                  |
| N | B3RLE6 | DR | methionine biosynthetic process                                                                                                                                                                       |
| N | B4E5X0 | CC | An essential GTPase which binds GTP, GDP and possibly (p)ppGpp with moderate affinity, with high nucleotide exchange rates and a fairly low GTP hydrolysis rate (By similarity)                       |
| N | B4E5X0 | CC | it may play a role in control of the cell cycle, stress response, ribosome biogenesis and in those bacteria that undergo differentiation, in morphogenesis control (Potential)                        |
| N | B4E5X0 | DE | GTP-binding protein obg;                                                                                                                                                                              |
| N | B4E5X0 | DR | GTPase activity                                                                                                                                                                                       |
| N | B4E5X0 | DR | magnesium ion binding                                                                                                                                                                                 |
| N | B4E8N5 | CC | May conjugate Arg from its aminoacyl-tRNA to the N- termini of proteins containing an N-terminal aspartate or glutamate (Potential).                                                                  |
| N | B4E8N5 | DE | Arginyltransferase;                                                                                                                                                                                   |
| N | B4E8N5 | DE | Putative arginyl-tRNA--protein transferase;                                                                                                                                                           |
| N | B4E8N5 | DE | R-transferase;                                                                                                                                                                                        |
| N | B4E8N5 | DR | acyltransferase activity                                                                                                                                                                              |
| N | B4E8N5 | DR | arginyltransferase activity                                                                                                                                                                           |

|   |        |    |                                                                                                                                                                                     |
|---|--------|----|-------------------------------------------------------------------------------------------------------------------------------------------------------------------------------------|
| N | B4E8N5 | DR | protein arginylation                                                                                                                                                                |
| N | B4EAW5 | CC | GTPase that plays an essential role in the late steps of ribosome biogenesis (By similarity).                                                                                       |
| N | B4EAW5 | DE | GTP-binding protein EngA;                                                                                                                                                           |
| N | B4EAW5 | DR | nucleoside-triphosphatase activity                                                                                                                                                  |
| N | B4EAW5 | DR | ribosome biogenesis                                                                                                                                                                 |
| N | B4EET3 | CC | Catalyzes the specific phosphorylation of 1,6-anhydro-N- acetylmuramic acid (anhMurNAc) with the simultaneous cleavage of the 1,6-anhydro ring, generating MurNAc-6-P               |
| N | B4EET3 | CC | is required for the utilization of anhmurNac either imported from the medium or derived from its own cell wall murein, and thus plays a role in cell wall recycling (By similarity) |
| N | B4EET3 | DE | AnhMurNAc kinase;                                                                                                                                                                   |
| N | B4EET3 | DE | Anhydro-N-acetylmuramic acid kinase;                                                                                                                                                |
| N | B4EET3 | DR | amino sugar metabolic process                                                                                                                                                       |
| N | B4EET3 | DR | kinase activity                                                                                                                                                                     |
| N | B4EET3 | DR | peptidoglycan turnover                                                                                                                                                              |
| N | B4EET3 | DR | phosphotransferase activity, alcohol group as acceptor                                                                                                                              |
| N | B4EK77 | CC | Catalyzes the conversion of acetaldehyde to acetyl-CoA, using NAD(+) and coenzyme A                                                                                                 |
| N | B4EK77 | CC | Is the final enzyme in the meta- cleavage pathway for the degradation of aromatic compounds (By similarity).                                                                        |
| N | B4EK77 | DE | Acetaldehyde dehydrogenase 1;                                                                                                                                                       |
| N | B4EK77 | DE | Acetaldehyde dehydrogenase [acetylating] 1;                                                                                                                                         |
| N | B4EK77 | DR | acetaldehyde dehydrogenase (acetylating) activity                                                                                                                                   |
| N | B4EK77 | DR | aromatic compound catabolic process                                                                                                                                                 |
| N | B4EK77 | DR | cellular amino acid metabolic process                                                                                                                                               |
| N | B4EK77 | DR | oxidation-reduction process                                                                                                                                                         |
| N | B4EUV9 | DE | Gamma-glutamylcysteine synthetase;                                                                                                                                                  |
| N | B4EUV9 | DE | Glutamate--cysteine ligase;                                                                                                                                                         |
| N | B4EUV9 | DR | glutamate-cysteine ligase activity                                                                                                                                                  |
| N | B4EUV9 | DR | glutathione biosynthetic process                                                                                                                                                    |
| N | B4EV71 | DE | Glutamine--tRNA ligase;                                                                                                                                                             |
| N | B4EV71 | DE | Glutaminyl-tRNA synthetase;                                                                                                                                                         |
| N | B4EV71 | DR | glutamine-tRNA ligase activity                                                                                                                                                      |
| N | B4EV71 | DR | glutaminyl-tRNA aminoacylation                                                                                                                                                      |
| N | B4EXE3 | CC | Binds to Cpn60 in the presence of Mg-ATP and suppresses the ATPase activity of the latter (By similarity).                                                                          |
| N | B4EXE3 | DE | 10 kDa chaperonin;                                                                                                                                                                  |
| N | B4EXE3 | DE | GroES protein;                                                                                                                                                                      |
| N | B4EXE3 | DE | Protein Cpn10;                                                                                                                                                                      |
| N | B4EXE3 | DR | protein folding                                                                                                                                                                     |
| N | B4HSS0 | CC | May be involved in N-glycosylation through its association with N-oligosaccharyl transferase (By similarity).                                                                       |
| N | B4HSS0 | DE | dolichyl-diphosphooligosaccharide--protein glycosyltransferase subunit 4 homolog                                                                                                    |
| N | B4HSS0 | DR | dolichyl-diphosphooligosaccharide-protein glycotransferase activity                                                                                                                 |
| N | B4HSS0 | DR | protein N-linked glycosylation                                                                                                                                                      |
| N | B4I5W3 | CC | Plays a central role in 2-thiolation of mcm(5)S(2)U at tRNA wobble positions of tRNA(Lys), tRNA(Glu) and tRNA(Gln)                                                                  |
| N | B4I5W3 | CC | may act by forming a heterodimer with NCSO/C101 that ligates sulfur from thiocarboxylated URM1 onto the uridine of tRNAs at wobble position (By similarity)                         |
| N | B4I5W3 | DE | Cytoplasmic tRNA 2-thiolation protein 2;                                                                                                                                            |
| N | B4I5W3 | DR | tRNA thio-modification                                                                                                                                                              |
| N | B4I5W3 | DR | tRNA wobble uridine modification                                                                                                                                                    |
| N | B4I9N7 | CC | Catalyzes the formation of N(7)-methylguanine at position 46 (m7G46) in tRNA (By similarity).                                                                                       |
| N | B4I9N7 | DE | tRNA (guanine-N(7)-)-methyltransferase;                                                                                                                                             |
| N | B4I9N7 | DE | tRNA(m7G46)-methyltransferase;                                                                                                                                                      |
| N | B4I9N7 | DR | tRNA (guanine-N7-)-methyltransferase activity                                                                                                                                       |
| N | B4IMF6 | CC | Molecular scaffold for [Fe-S] cluster assembly of mitochondrial iron-sulfur proteins (By similarity).                                                                               |
| N | B4IMF6 | DE | NFU1 iron-sulfur cluster scaffold homolog, mitochondrial;                                                                                                                           |
| N | B4IMF6 | DR | ATP-dependent helicase activity                                                                                                                                                     |
| N | B4IMF6 | DR | iron ion binding                                                                                                                                                                    |
| N | B4IMF6 | DR | iron-sulfur cluster assembly                                                                                                                                                        |
| N | B4IMF6 | DR | iron-sulfur cluster binding                                                                                                                                                         |

|   |        |    |                                                                                                                                                                                                                                                                 |
|---|--------|----|-----------------------------------------------------------------------------------------------------------------------------------------------------------------------------------------------------------------------------------------------------------------|
| N | B4IMF6 | DR | nucleic acid binding                                                                                                                                                                                                                                            |
| N | B4IMI7 | DE | Integrator complex subunit 3 homolog;                                                                                                                                                                                                                           |
| N | B4IMI7 | DE | SOSS complex subunit A homolog;                                                                                                                                                                                                                                 |
| N | B4J4G8 | CC | Component of the eukaryotic translation initiation factor 3 (eIF-3) complex, which is involved in protein synthesis and, together with other initiation factors, stimulates binding of mRNA and methionyl-tRNA <sub>i</sub> to the 40S ribosome                 |
| N | B4J4G8 | CC | This subunit can bind 18S rRNA (By similarity).                                                                                                                                                                                                                 |
| N | B4J4G8 | DE | Eukaryotic translation initiation factor 3 RNA-binding subunit 1;                                                                                                                                                                                               |
| N | B4J4G8 | DE | Eukaryotic translation initiation factor 3 subunit 4-1;                                                                                                                                                                                                         |
| N | B4J4G8 | DE | Eukaryotic translation initiation factor 3 subunit G-1;                                                                                                                                                                                                         |
| N | B4J4G8 | DE | eIF-3 RNA-binding subunit 1;                                                                                                                                                                                                                                    |
| N | B4J4G8 | DR | nucleotide binding                                                                                                                                                                                                                                              |
| N | B4J4G8 | DR | translation initiation factor activity                                                                                                                                                                                                                          |
| N | B4J4G8 | DR | zinc ion binding                                                                                                                                                                                                                                                |
| N | B4JBN5 | CC | Adenylyltransferase that mediates the addition of adenosine 5'-monophosphate (AMP) to specific residues of target proteins (By similarity).                                                                                                                     |
| N | B4JBN5 | DE | Adenosine monophosphate-protein transferase FICD homolog;                                                                                                                                                                                                       |
| N | B4JBN5 | DR | protein adenylation                                                                                                                                                                                                                                             |
| N | B4JBN5 | DR | protein adenylyltransferase activity                                                                                                                                                                                                                            |
| N | B4KG03 | DE | Probable cGMP 3',5'-cyclic phosphodiesterase subunit delta;                                                                                                                                                                                                     |
| N | B4KG03 | DR | 3',5'-cyclic-nucleotide phosphodiesterase activity                                                                                                                                                                                                              |
| N | B4KG03 | DR | visual perception                                                                                                                                                                                                                                               |
| N | B4KRQ4 | CC | Regulator of deubiquitinating complexes                                                                                                                                                                                                                         |
| N | B4KRQ4 | CC | Activates deubiquitination by increasing the catalytic turnover without increasing the affinity of deubiquitinating enzymes for the substrate (By similarity).                                                                                                  |
| N | B4KRQ4 | DE | WD repeat-containing protein 48 homolog;                                                                                                                                                                                                                        |
| N | B4L629 | CC | Catalyzes the oxidative cleavage of the L-tryptophan (L- Trp) pyrrole ring (By similarity).                                                                                                                                                                     |
| N | B4L629 | DE | Protein vermilion;                                                                                                                                                                                                                                              |
| N | B4L629 | DE | Tryptamin 2,3-dioxygenase;                                                                                                                                                                                                                                      |
| N | B4L629 | DE | Tryptophan 2,3-dioxygenase;                                                                                                                                                                                                                                     |
| N | B4L629 | DE | Tryptophan oxygenase;                                                                                                                                                                                                                                           |
| N | B4L629 | DE | Tryptophan pyrrolase;                                                                                                                                                                                                                                           |
| N | B4L629 | DE | Tryptophanase;                                                                                                                                                                                                                                                  |
| N | B4L629 | DR | oxidation-reduction process                                                                                                                                                                                                                                     |
| N | B4L629 | DR | tryptophan 2,3-dioxygenase activity                                                                                                                                                                                                                             |
| N | B4L629 | DR | tryptophan catabolic process to kynurenine                                                                                                                                                                                                                      |
| N | B4LIH0 | CC | A calcium channel that regulates synaptic endocytosis and hence couples exo- with endocytosis                                                                                                                                                                   |
| N | B4LIH0 | CC | required in the nervous system and necessary in photoreceptor cells (By similarity)                                                                                                                                                                             |
| N | B4LIH0 | DE | Calcium channel flower;                                                                                                                                                                                                                                         |
| N | B4LIH0 | DR | calcium channel activity                                                                                                                                                                                                                                        |
| N | B4LIH0 | DR | photoreceptor cell differentiation                                                                                                                                                                                                                              |
| N | B4LIH0 | DR | synaptic vesicle endocytosis                                                                                                                                                                                                                                    |
| N | B4LNQ8 | CC | Component of the eukaryotic translation initiation factor 3 (eIF-3) complex, which is involved in protein synthesis and, together with other initiation factors, stimulates binding of mRNA and methionyl-tRNA <sub>i</sub> to the 40S ribosome (By similarity) |
| N | B4LNQ8 | DE | Eukaryotic translation initiation factor 3 subunit K;                                                                                                                                                                                                           |
| N | B4LNQ8 | DR | regulation of translational initiation                                                                                                                                                                                                                          |
| N | B4LNQ8 | DR | ribosome binding                                                                                                                                                                                                                                                |
| N | B4LNQ8 | DR | translation initiation factor activity                                                                                                                                                                                                                          |
| N | B4N208 | CC | Catalyzes the covalent attachment of ubiquitin to other proteins                                                                                                                                                                                                |
| N | B4N208 | CC | Acts as an essential factor of the anaphase promoting complex/cyclosome (APC/C), a cell cycle-regulated ubiquitin ligase that controls progression through mitosis                                                                                              |
| N | B4N208 | CC | Acts by specifically elongating polyubiquitin chains initiated by the E2 enzyme UbcH10 on APC/C substrates, enhancing the degradation of APC/C substrates by the proteasome and promoting mitotic exit (By similarity).                                         |
| N | B4N208 | DE | Ubiquitin carrier protein S;                                                                                                                                                                                                                                    |
| N | B4N208 | DE | Ubiquitin-conjugating enzyme E2 S;                                                                                                                                                                                                                              |
| N | B4N208 | DE | Ubiquitin-protein ligase S;                                                                                                                                                                                                                                     |
| N | B4N208 | DR | anaphase-promoting complex-dependent proteasomal ubiquitin-dependent protein catabolic process                                                                                                                                                                  |
| N | B4N208 | DR | cell division                                                                                                                                                                                                                                                   |
| N | B4N208 | DR | exit from mitosis                                                                                                                                                                                                                                               |
| N | B4N208 | DR | post-translational protein modification                                                                                                                                                                                                                         |

|   |        |    |                                                                                                                                                                                                                                    |
|---|--------|----|------------------------------------------------------------------------------------------------------------------------------------------------------------------------------------------------------------------------------------|
| N | B4N208 | DR | ubiquitin-protein ligase activity                                                                                                                                                                                                  |
| N | B4N4D9 | CC | Component of the cytosolic iron-sulfur (Fe/S) protein assembly machinery may bind and transfer a labile 4Fe-4S cluster to target apoproteins (By similarity).                                                                      |
| N | B4N4D9 | CC | Required for maturation of extramitochondrial Fe/S proteins                                                                                                                                                                        |
| N | B4N4D9 | DE | Cytosolic Fe-S cluster assembly factor NUBP2 homolog;                                                                                                                                                                              |
| N | B4N4D9 | DR | 4 iron, 4 sulfur cluster binding                                                                                                                                                                                                   |
| N | B4N4D9 | DR | metal ion binding                                                                                                                                                                                                                  |
| N | B4P925 | CC | Essential arginine methyltransferase that can both catalyze the formation of omega-N monomethylarginine (MMA) and symmetrical dimethylarginine (SDMA).                                                                             |
| N | B4P925 | CC | Specifically mediates the symmetrical dimethylation of arginine residues in the small nuclear ribonucleoproteins SmD1 and SmD3 (By similarity).                                                                                    |
| N | B4P925 | DE | Protein arginine N-methyltransferase 7;                                                                                                                                                                                            |
| N | B4P925 | DR | protein-arginine omega-N symmetric methyltransferase activity                                                                                                                                                                      |
| N | B4PNE2 | CC | Catalyzes the interconversion of methylthioribose-1- phosphate (MTR-1-P) into methylthioribulose-1-phosphate (MTRu-1-P) (By similarity).                                                                                           |
| N | B4PNE2 | DE | MTR-1-P isomerase;                                                                                                                                                                                                                 |
| N | B4PNE2 | DE | Methylthioribose-1-phosphate isomerase;                                                                                                                                                                                            |
| N | B4PNE2 | DE | S-methyl-5-thioribose-1-phosphate isomerase;                                                                                                                                                                                       |
| N | B4PNE2 | DE | Translation initiation factor eIF-2B subunit alpha/beta/delta-like protein;                                                                                                                                                        |
| N | B4PNE2 | DR | S-methyl-5-thioribose-1-phosphate isomerase activity                                                                                                                                                                               |
| N | B4PNE2 | DR | methionine biosynthetic process                                                                                                                                                                                                    |
| N | B4QEJ9 | DE | Protein crossbronx-like;                                                                                                                                                                                                           |
| N | B4QEJ9 | DR | acid-amino acid ligase activity                                                                                                                                                                                                    |
| N | B4QEJ9 | DR | post-translational protein modification                                                                                                                                                                                            |
| N | B4REI3 | CC | Transfers the gamma-phosphate of ATP to the 4'-position of a tetraacyldisaccharide 1-phosphate intermediate (termed DS-1- P) to form tetraacyldisaccharide 1,4'-bis-phosphate (lipid IVA) (By similarity).                         |
| N | B4REI3 | DE | Lipid A 4'-kinase;                                                                                                                                                                                                                 |
| N | B4REI3 | DE | Tetraacyldisaccharide 4'-kinase;                                                                                                                                                                                                   |
| N | B4REI3 | DR | lipid A biosynthetic process                                                                                                                                                                                                       |
| N | B4REI3 | DR | tetraacyldisaccharide 4'-kinase activity                                                                                                                                                                                           |
| N | B4RH54 | CC | Necessary for efficient RNA polymerase transcription elongation past template-encoded arresting sites                                                                                                                              |
| N | B4RH54 | CC | Cleavage of the nascent transcript by cleavage factors such as greA or greB allows the resumption of elongation from the new 3'terminus                                                                                            |
| N | B4RH54 | CC | GreA releases sequences of 2 to 3 nucleotides (By similarity). The arresting sites in DNA have the property of trapping a certain fraction of elongating RNA polymerases that pass through, resulting in locked ternary complexes. |
| N | B4RH54 | DE | Transcript cleavage factor greA;                                                                                                                                                                                                   |
| N | B4RH54 | DE | Transcription elongation factor greA;                                                                                                                                                                                              |
| N | B4RH54 | DR | transcription elongation regulator activity                                                                                                                                                                                        |
| N | B4RIY7 | CC | Catalyzes the interconversion of 2-phosphoglycerate and 3-phosphoglycerate (By similarity).                                                                                                                                        |
| N | B4RIY7 | DE | 2,3-bisphosphoglycerate-dependent phosphoglycerate mutase;                                                                                                                                                                         |
| N | B4RIY7 | DE | BPG-dependent PGAM;                                                                                                                                                                                                                |
| N | B4RIY7 | DE | Phosphoglyceromutase;                                                                                                                                                                                                              |
| N | B4RIY7 | DR | phosphoglycerate mutase activity                                                                                                                                                                                                   |
| N | B4RJZ8 | DE | DTB synthetase;                                                                                                                                                                                                                    |
| N | B4RJZ8 | DE | Dethiobiotin synthase;                                                                                                                                                                                                             |
| N | B4RJZ8 | DE | Dethiobiotin synthetase;                                                                                                                                                                                                           |
| N | B4RJZ8 | DR | biotin biosynthetic process                                                                                                                                                                                                        |
| N | B4RJZ8 | DR | dethiobiotin synthase activity                                                                                                                                                                                                     |
| N | B4RJZ8 | DR | magnesium ion binding                                                                                                                                                                                                              |
| N | B4RLX9 | DE | 3-dehydroquinase;                                                                                                                                                                                                                  |
| N | B4RLX9 | DE | 3-dehydroquinone dehydratase;                                                                                                                                                                                                      |
| N | B4RLX9 | DE | Type I DHQase;                                                                                                                                                                                                                     |
| N | B4RLX9 | DR | 3-dehydroquinone dehydratase activity                                                                                                                                                                                              |
| N | B4RLX9 | DR | aromatic amino acid family biosynthetic process                                                                                                                                                                                    |
| N | B4S3Q6 | DE | Glutamate-1-semialdehyde 2,1-aminomutase;                                                                                                                                                                                          |
| N | B4S3Q6 | DE | Glutamate-1-semialdehyde aminotransferase;                                                                                                                                                                                         |
| N | B4S3Q6 | DR | chlorophyll biosynthetic process                                                                                                                                                                                                   |
| N | B4S3Q6 | DR | glutamate-1-semialdehyde 2,1-aminomutase activity                                                                                                                                                                                  |
| N | B4S3Q6 | DR | pyridoxal phosphate binding                                                                                                                                                                                                        |
| N | B4S3Q6 | DR | transaminase activity                                                                                                                                                                                                              |
| N | B4S517 | CC | Involved in the transcription termination process (By similarity).                                                                                                                                                                 |

|   |        |    |                                                                                                                                                                                                                                                       |
|---|--------|----|-------------------------------------------------------------------------------------------------------------------------------------------------------------------------------------------------------------------------------------------------------|
| N | B4S517 | DE | N utilization substance protein B homolog;                                                                                                                                                                                                            |
| N | B4S517 | DE | Protein nusB;                                                                                                                                                                                                                                         |
| N | B4S517 | DR | regulation of transcription, DNA-dependent                                                                                                                                                                                                            |
| N | B4S517 | DR | transcription termination factor activity                                                                                                                                                                                                             |
| N | B4SFQ8 | CC | Catalyzes the reversible oxidation of malate to oxaloacetate (By similarity).                                                                                                                                                                         |
| N | B4SFQ8 | DE | Malate dehydrogenase;                                                                                                                                                                                                                                 |
| N | B4SFQ8 | DR | L-malate dehydrogenase activity                                                                                                                                                                                                                       |
| N | B4SFQ8 | DR | cellular carbohydrate metabolic process                                                                                                                                                                                                               |
| N | B4SFQ8 | DR | malate metabolic process                                                                                                                                                                                                                              |
| N | B4SFQ8 | DR | tricarboxylic acid cycle                                                                                                                                                                                                                              |
| N | B4SNP6 | CC | Specifically methylates the N7 position of guanosine in position 527 of 16S rRNA (By similarity).                                                                                                                                                     |
| N | B4SNP6 | DE | 16S rRNA 7-methylguanosine methyltransferase;                                                                                                                                                                                                         |
| N | B4SNP6 | DE | 16S rRNA m7G methyltransferase;                                                                                                                                                                                                                       |
| N | B4SNP6 | DE | Ribosomal RNA small subunit methyltransferase G;                                                                                                                                                                                                      |
| N | B4SNP6 | DR | rRNA methyltransferase activity                                                                                                                                                                                                                       |
| N | B4SNX3 | CC | Subunit of malonate decarboxylase, it is an acyl carrier protein to which acetyl and malonyl thioester residues are bound via a 2'-(5"-phosphoribosyl)-3'-dephospho-CoA prosthetic group and turn over during the catalytic mechanism (By similarity) |
| N | B4SNX3 | DE | Malonate decarboxylase acyl carrier protein;                                                                                                                                                                                                          |
| N | B4SNX3 | DE | Malonate decarboxylase subunit delta;                                                                                                                                                                                                                 |
| N | B4SQZ7 | CC | bidirectionally degrades single-stranded DNA into large acid-insoluble oligonucleotides, which are then degraded further into small acid-soluble oligonucleotides (By similarity)                                                                     |
| N | B4SQZ7 | DE | Exodeoxyribonuclease 7 small subunit;                                                                                                                                                                                                                 |
| N | B4SQZ7 | DE | Exodeoxyribonuclease VII small subunit;                                                                                                                                                                                                               |
| N | B4SQZ7 | DE | Exonuclease VII small subunit;                                                                                                                                                                                                                        |
| N | B4SQZ7 | DR | DNA catabolic process                                                                                                                                                                                                                                 |
| N | B4SQZ7 | DR | exodeoxyribonuclease VII activity                                                                                                                                                                                                                     |
| N | B4SRL3 | CC | required for accurate and efficient protein synthesis under certain stress conditions                                                                                                                                                                 |
| N | B4SRL3 | CC | Back- translocation proceeds from a post-translocation (POST) complex to a pre-translocation (PRE) complex, thus giving elongation factor G a second chance to translocate the tRNAs correctly                                                        |
| N | B4SRL3 | CC | Binds to ribosomes in a GTP-dependent manner (By similarity).                                                                                                                                                                                         |
| N | B4SRL3 | CC | May act as a fidelity factor of the translation reaction, by catalyzing a one-codon backward translocation of tRNAs on improperly translocated ribosomes                                                                                              |
| N | B4SRL3 | DE | Elongation factor 4;                                                                                                                                                                                                                                  |
| N | B4SRL3 | DE | Ribosomal back-translocase LepA;                                                                                                                                                                                                                      |
| N | B4SRL3 | DR | GTPase activity                                                                                                                                                                                                                                       |
| N | B4SRU3 | CC | Catalyzes the dephosphorylation of undecaprenyl diphosphate (UPP)                                                                                                                                                                                     |
| N | B4SRU3 | CC | Confers resistance to bacitracin (By similarity).                                                                                                                                                                                                     |
| N | B4SRU3 | DE | Bacitracin resistance protein;                                                                                                                                                                                                                        |
| N | B4SRU3 | DE | Undecaprenyl pyrophosphate phosphatase;                                                                                                                                                                                                               |
| N | B4SRU3 | DE | Undecaprenyl-diphosphatase;                                                                                                                                                                                                                           |
| N | B4SRU3 | DR | cellular cell wall organization                                                                                                                                                                                                                       |
| N | B4SRU3 | DR | dephosphorylation                                                                                                                                                                                                                                     |
| N | B4SRU3 | DR | peptidoglycan biosynthetic process                                                                                                                                                                                                                    |
| N | B4SRU3 | DR | regulation of cell shape                                                                                                                                                                                                                              |
| N | B4SRU3 | DR | response to antibiotic                                                                                                                                                                                                                                |
| N | B4SRU3 | DR | undecaprenyl-diphosphatase activity                                                                                                                                                                                                                   |
| N | B4ST36 | DE | UPF0082 protein Smal_3128;                                                                                                                                                                                                                            |
| N | B4SVG0 | DE | Arginine--tRNA ligase;                                                                                                                                                                                                                                |
| N | B4SVG0 | DE | Arginyl-tRNA synthetase;                                                                                                                                                                                                                              |
| N | B4SVG0 | DR | arginine-tRNA ligase activity                                                                                                                                                                                                                         |
| N | B4SVG0 | DR | arginyl-tRNA aminoacylation                                                                                                                                                                                                                           |
| N | B4SYK7 | DE | Leucine--tRNA ligase;                                                                                                                                                                                                                                 |
| N | B4SYK7 | DE | Leucyl-tRNA synthetase;                                                                                                                                                                                                                               |
| N | B4SYK7 | DR | leucine-tRNA ligase activity                                                                                                                                                                                                                          |
| N | B4SYK7 | DR | leucyl-tRNA aminoacylation                                                                                                                                                                                                                            |
| N | B4SYY7 | CC | NDH-1 shuttles electrons from NADH, via FMN and iron- sulfur (Fe-S) centers, to quinones in the respiratory chain                                                                                                                                     |
| N | B4SYY7 | CC | Couples the redox reaction to proton translocation (for every two electrons transferred, four hydrogen ions are translocated across the cytoplasmic membrane), and thus conserves the redox energy in a proton gradient (By similarity)               |
| N | B4SYY7 | CC | The immediate electron acceptor for the enzyme in this species is believed to be ubiquinone                                                                                                                                                           |



|   |        |    |                                                                                                                                                                                                                        |
|---|--------|----|------------------------------------------------------------------------------------------------------------------------------------------------------------------------------------------------------------------------|
| N | B4SYY7 | DE | NADH dehydrogenase I subunit N;                                                                                                                                                                                        |
| N | B4SYY7 | DE | NADH-quinone oxidoreductase subunit N;                                                                                                                                                                                 |
| N | B4SYY7 | DE | NDH-1 subunit N;                                                                                                                                                                                                       |
| N | B4SYY7 | DR | ATP synthesis coupled electron transport                                                                                                                                                                               |
| N | B4SYY7 | DR | NADH dehydrogenase (ubiquinone) activity                                                                                                                                                                               |
| N | B4SYY7 | DR | quinone binding                                                                                                                                                                                                        |
| N | B4SZJ7 | CC | Catalyzes the conversion of dethiobiotin (DTB) to biotin by the insertion of a sulfur atom into dethiobiotin via a radical- based mechanism (By similarity).                                                           |
| N | B4SZJ7 | DE | Biotin synthase;                                                                                                                                                                                                       |
| N | B4SZJ7 | DR | 2 iron, 2 sulfur cluster binding                                                                                                                                                                                       |
| N | B4SZJ7 | DR | 4 iron, 4 sulfur cluster binding                                                                                                                                                                                       |
| N | B4SZJ7 | DR | biotin biosynthetic process                                                                                                                                                                                            |
| N | B4SZJ7 | DR | biotin synthase activity                                                                                                                                                                                               |
| N | B4SZJ7 | DR | metal ion binding                                                                                                                                                                                                      |
| N | B4T2T9 | CC | Catalyzes the reversible retro-aldol cleavage of 4- hydroxy-2-ketoheptane-1,7-dioate (HKHD) to pyruvate and succinic semialdehyde (By similarity).                                                                     |
| N | B4T2T9 | DE | 2,4-dihydroxyhept-2-ene-1,7-dioic acid aldolase;                                                                                                                                                                       |
| N | B4T2T9 | DE | 4-hydroxy-2-ketoheptane-1,7-dioate aldolase;                                                                                                                                                                           |
| N | B4T2T9 | DE | 4-hydroxy-2-oxo-heptane-1,7-dioate aldolase;                                                                                                                                                                           |
| N | B4T2T9 | DE | HHED aldolase;                                                                                                                                                                                                         |
| N | B4T2T9 | DE | HKHD aldolase;                                                                                                                                                                                                         |
| N | B4T2T9 | DR | 2,4-dihydroxyhept-2-ene-1,7-dioate aldolase activity                                                                                                                                                                   |
| N | B4T2T9 | DR | aldehyde-lyase activity                                                                                                                                                                                                |
| N | B4T2T9 | DR | metal ion binding                                                                                                                                                                                                      |
| N | B4T2T9 | DR | phenylacetate catabolic process                                                                                                                                                                                        |
| N | B4T755 | CC | This protein is one of the early assembly proteins of the 50S ribosomal subunit, although it is not seen to bind rRNA by itself                                                                                        |
| N | B4T755 | CC | It is important during the early stages of 50S assembly (By similarity).                                                                                                                                               |
| N | B4T755 | DE | 50S ribosomal protein L13;                                                                                                                                                                                             |
| N | B4T755 | DR | structural constituent of ribosome                                                                                                                                                                                     |
| N | B4T8R5 | CC | bidirectionally degrades single-stranded DNA into large acid-insoluble oligonucleotides, which are then degraded further into small acid-soluble oligonucleotides (By similarity)                                      |
| N | B4T8R5 | DE | Exodeoxyribonuclease 7 small subunit;                                                                                                                                                                                  |
| N | B4T8R5 | DE | Exodeoxyribonuclease VII small subunit;                                                                                                                                                                                |
| N | B4T8R5 | DE | Exonuclease VII small subunit;                                                                                                                                                                                         |
| N | B4T8R5 | DR | DNA catabolic process                                                                                                                                                                                                  |
| N | B4T8R5 | DR | exodeoxyribonuclease VII activity                                                                                                                                                                                      |
| N | B4T9Y6 | CC | Phosphorolytic exoribonuclease that removes nucleotide residues following the - CCA terminus of tRNA and adds nucleotides to the ends of RNA molecules by using nucleoside diphosphates as substrates (By similarity). |
| N | B4T9Y6 | DE | Ribonuclease PH;                                                                                                                                                                                                       |
| N | B4T9Y6 | DE | tRNA nucleotidyltransferase;                                                                                                                                                                                           |
| N | B4T9Y6 | DR | 3'-5'-exoribonuclease activity                                                                                                                                                                                         |
| N | B4T9Y6 | DR | tRNA nucleotidyltransferase activity                                                                                                                                                                                   |
| N | B4T9Y6 | DR | tRNA processing                                                                                                                                                                                                        |
| N | B4T9Y6 | DR | tRNA-specific ribonuclease activity                                                                                                                                                                                    |
| N | B4TBN7 | CC | Formation of pseudouridine at positions 38, 39 and 40 in the anticodon stem and loop of transfer RNAs (By similarity).                                                                                                 |
| N | B4TBN7 | DE | tRNA pseudouridine synthase A;                                                                                                                                                                                         |
| N | B4TBN7 | DE | tRNA pseudouridylation synthase I;                                                                                                                                                                                     |
| N | B4TBN7 | DE | tRNA-uridine isomerase I;                                                                                                                                                                                              |
| N | B4TBN7 | DR | pseudouridine synthase activity                                                                                                                                                                                        |
| N | B4TBN7 | DR | pseudouridine synthesis                                                                                                                                                                                                |
| N | B4TBN7 | DR | tRNA processing                                                                                                                                                                                                        |
| N | B4TGH1 | DE | Threonine--tRNA ligase;                                                                                                                                                                                                |
| N | B4TGH1 | DE | Threonyl-tRNA synthetase;                                                                                                                                                                                              |
| N | B4TGH1 | DR | metal ion binding                                                                                                                                                                                                      |
| N | B4TGH1 | DR | threonine-tRNA ligase activity                                                                                                                                                                                         |
| N | B4TGH1 | DR | threonyl-tRNA aminoacylation                                                                                                                                                                                           |
| N | B4THE9 | CC | Involved in the export of arginine                                                                                                                                                                                     |
| N | B4THE9 | CC | Important to control the intracellular level of arginine and the correct balance between arginine and lysine (By similarity).                                                                                          |
| N | B4THE9 | DE | Arginine exporter protein ArgO;                                                                                                                                                                                        |
| N | B4THE9 | DR | amino acid transport                                                                                                                                                                                                   |

|   |        |    |                                                                                                                                                                                                              |
|---|--------|----|--------------------------------------------------------------------------------------------------------------------------------------------------------------------------------------------------------------|
| N | B4TJR9 | CC | This protein is one of the early assembly proteins of the 50S ribosomal subunit, although it is not seen to bind rRNA by itself                                                                              |
| N | B4TJR9 | CC | It is important during the early stages of 50S assembly (By similarity).                                                                                                                                     |
| N | B4TJR9 | DE | 50S ribosomal protein L13;                                                                                                                                                                                   |
| N | B4TJR9 | DR | structural constituent of ribosome                                                                                                                                                                           |
| N | B4TKN2 | CC | Transport system that facilitates potassium-efflux, possibly by potassium-proton antiport (By similarity).                                                                                                   |
| N | B4TKN2 | DE | Glutathione-regulated potassium-efflux system protein kefB;                                                                                                                                                  |
| N | B4TKN2 | DE | K(+)/H(+) antiporter;                                                                                                                                                                                        |
| N | B4TKN2 | DE | NEM-activatable K(+)/H(+) antiporter;                                                                                                                                                                        |
| N | B4TKN2 | DR | catalytic activity                                                                                                                                                                                           |
| N | B4TKN2 | DR | glutathione-regulated potassium exporter activity                                                                                                                                                            |
| N | B4TKN2 | DR | solute:hydrogen antiporter activity                                                                                                                                                                          |
| N | B4TQJ4 | CC | Seems to be the binding site for several of the factors involved in protein synthesis and appears to be essential for accurate translation (By similarity).                                                  |
| N | B4TQJ4 | DE | 50S ribosomal protein L7/L12;                                                                                                                                                                                |
| N | B4TQJ4 | DR | structural constituent of ribosome                                                                                                                                                                           |
| N | B4TSS5 | DE | Dihydroorotase;                                                                                                                                                                                              |
| N | B4TSS5 | DR | dihydroorotase activity                                                                                                                                                                                      |
| N | B4TSS5 | DR | metal ion binding                                                                                                                                                                                            |
| N | B4TSS5 | DR | pyrimidine base biosynthetic process                                                                                                                                                                         |
| N | B4TSS5 | DR | pyrimidine nucleotide biosynthetic process                                                                                                                                                                   |
| N | B4TUT6 | CC | Participates in cysteine desulfuration mediated by sufS                                                                                                                                                      |
| N | B4TUT6 | CC | Cysteine desulfuration mobilizes sulfur from L-cysteine to yield L-alanine and constitutes an essential step in sulfur metabolism for biosynthesis of a variety of sulfur-containing biomolecules            |
| N | B4TUT6 | CC | Functions as a sulfur acceptor for sufS, by mediating the direct transfer of the sulfur atom from the S-sulfanyleysteine of sufS, an intermediate product of cysteine desulfuration process (By similarity). |
| N | B4TUT6 | DE | Cysteine desulfuration protein sufE;                                                                                                                                                                         |
| N | B4TX11 | CC | Involved in mRNA degradation                                                                                                                                                                                 |
| N | B4TX11 | CC | Hydrolyzes single-stranded polyribonucleotides processively in the 3' to 5' direction (By similarity).                                                                                                       |
| N | B4TX11 | DE | Exoribonuclease 2;                                                                                                                                                                                           |
| N | B4TX11 | DE | Exoribonuclease II;                                                                                                                                                                                          |
| N | B4TX11 | DE | Ribonuclease II;                                                                                                                                                                                             |
| N | B4TX11 | DR | RNA catabolic process                                                                                                                                                                                        |
| N | B4TX11 | DR | exoribonuclease II activity                                                                                                                                                                                  |
| N | B4TXB2 | CC | Specifically methylates the cytosine at position 967 (m5C967) of 16S rRNA (By similarity).                                                                                                                   |
| N | B4TXB2 | DE | 16S rRNA m5C967 methyltransferase;                                                                                                                                                                           |
| N | B4TXB2 | DE | Ribosomal RNA small subunit methyltransferase B;                                                                                                                                                             |
| N | B4TXB2 | DE | rRNA (cytosine-C(5)-)-methyltransferase rsmB;                                                                                                                                                                |
| N | B4TXB2 | DR | rRNA methyltransferase activity                                                                                                                                                                              |
| N | B4TXB2 | DR | regulation of transcription, DNA-dependent                                                                                                                                                                   |
| N | B4U2Z3 | CC | Site-specific tyrosine recombinase, which acts by catalyzing the cutting and rejoining of the recombining DNA molecules                                                                                      |
| N | B4U2Z3 | CC | Essential to convert dimers of the bacterial chromosome into monomers to permit their segregation at cell division (By similarity).                                                                          |
| N | B4U2Z3 | DE | Tyrosine recombinase xerS;                                                                                                                                                                                   |
| N | B4U2Z3 | DR | DNA integration                                                                                                                                                                                              |
| N | B4U2Z3 | DR | DNA recombination                                                                                                                                                                                            |
| N | B4U2Z3 | DR | cell division                                                                                                                                                                                                |
| N | B4U2Z3 | DR | chromosome segregation                                                                                                                                                                                       |
| N | B4U8K1 | CC | Catalyzes the attachment of isoleucine to tRNA(Ile)                                                                                                                                                          |
| N | B4U8K1 | CC | As IleRS can inadvertently accommodate and process structurally similar amino acids such as valine, to avoid such errors it has two additional distinct tRNA(Ile)-dependent editing activities               |
| N | B4U8K1 | CC | One activity is designated as 'pretransfer' editing and involves the hydrolysis of activated Val-AMP                                                                                                         |
| N | B4U8K1 | CC | The other activity is designated 'posttransfer' editing and involves deacylation of mischarged Val-tRNA(Ile) (By similarity).                                                                                |
| N | B4U8K1 | DE | Isoleucine--tRNA ligase;                                                                                                                                                                                     |
| N | B4U8K1 | DE | Isoleucyl-tRNA synthetase;                                                                                                                                                                                   |
| N | B4U8K1 | DR | isoleucine-tRNA ligase activity                                                                                                                                                                              |

|   |        |    |                                                                                                                                                     |
|---|--------|----|-----------------------------------------------------------------------------------------------------------------------------------------------------|
| N | B4U8K1 | DR | isoleucyl-tRNA aminoacylation                                                                                                                       |
| N | B4U8K1 | DR | metal ion binding                                                                                                                                   |
| N | B4U9R1 | CC | Catalyzes the transfer of an acyl group from acyl- phosphate (acyl-PO(4)) to glycerol-3-phosphate (G3P) to form lysophosphatidic acid (LPA)         |
| N | B4U9R1 | CC | This enzyme utilizes acyl-phosphate as fatty acyl donor, but not acyl-CoA or acyl-ACP (By similarity).                                              |
| N | B4U9R1 | DE | Acyl-PO4 G3P acyltransferase;                                                                                                                       |
| N | B4U9R1 | DE | Acyl-phosphate--glycerol-3-phosphate acyltransferase;                                                                                               |
| N | B4U9R1 | DE | G3P acyltransferase;                                                                                                                                |
| N | B4U9R1 | DE | Glycerol-3-phosphate acyltransferase;                                                                                                               |
| N | B4U9R1 | DE | LPA synthase;                                                                                                                                       |
| N | B4U9R1 | DE | Lysophosphatidic acid synthase;                                                                                                                     |
| N | B4U9R1 | DR | phospholipid biosynthetic process                                                                                                                   |
| N | B4U9R1 | DR | transferase activity, transferring acyl groups other than amino-acyl groups                                                                         |
| N | B5BA39 | CC | Binds directly to 23S ribosomal RNA and is necessary for the in vitro assembly process of the 50S ribosomal subunit                                 |
| N | B5BA39 | CC | it is not involved in the protein synthesizing functions of that subunit (By similarity)                                                            |
| N | B5BA39 | DE | 50S ribosomal protein L20;                                                                                                                          |
| N | B5BA39 | DR | structural constituent of ribosome                                                                                                                  |
| N | B5BBD2 | DE | Protein yceI;                                                                                                                                       |
| N | B5BBH3 | CC | Interacts with CbpA and inhibits both the DnaJ-like co- chaperone activity and the DNA binding activity of CbpA                                     |
| N | B5BBH3 | CC | Does not inhibit the co-chaperone activity of DnaJ (By similarity).                                                                                 |
| N | B5BBH3 | CC | Together with CbpA, modulates the activity of the DnaK chaperone system                                                                             |
| N | B5BBH3 | DE | Chaperone modulatory protein CbpM;                                                                                                                  |
| N | B5BCW8 | CC | ATP-dependent carboxylate-amine ligase (By similarity).                                                                                             |
| N | B5BCW8 | DE | Carboxylate-amine ligase YbdK;                                                                                                                      |
| N | B5BCW8 | DR | glutamate-cysteine ligase activity                                                                                                                  |
| N | B5BCW8 | DR | glutathione biosynthetic process                                                                                                                    |
| N | B5BDA7 | CC | Catalyzes the ATP-dependent transfer of a sulfur to tRNA to produce 4-thiouridine in position 8 of tRNAs, which functions as a near-UV photosensor  |
| N | B5BDA7 | CC | Also catalyzes the transfer of sulfur to the sulfur carrier protein ThiS, forming ThiS-thiocarboxylate                                              |
| N | B5BDA7 | CC | The sulfur is donated as persulfide by iscS (By similarity).                                                                                        |
| N | B5BDA7 | CC | This is a step in the synthesis of thiazole, in the thiamine biosynthesis pathway                                                                   |
| N | B5BDA7 | DE | Sulfur carrier protein ThiS sulfurtransferase;                                                                                                      |
| N | B5BDA7 | DE | Thiamine biosynthesis protein thiI;                                                                                                                 |
| N | B5BDA7 | DE | tRNA 4-thiouridine synthase;                                                                                                                        |
| N | B5BDA7 | DE | tRNA sulfurtransferase;                                                                                                                             |
| N | B5BDA7 | DR | thiamine biosynthetic process                                                                                                                       |
| N | B5BDA7 | DR | transferase activity                                                                                                                                |
| N | B5BG11 | CC | Catalyzes the phosphorylation of D-glycero-D-manno- heptose 7-phosphate at the C-1 position to form D,D-heptose-1,7- bisphosphate (By similarity).  |
| N | B5BG11 | DE | Bifunctional protein hldE;                                                                                                                          |
| N | B5BG11 | DE | D-beta-D-heptose 1-phosphate adenosyltransferase;                                                                                                   |
| N | B5BG11 | DE | D-beta-D-heptose 7-phosphate kinase;                                                                                                                |
| N | B5BG11 | DE | D-beta-D-heptose 7-phosphotransferase;                                                                                                              |
| N | B5BG11 | DR | biosynthetic process                                                                                                                                |
| N | B5BG11 | DR | carbohydrate metabolic process                                                                                                                      |
| N | B5BG11 | DR | kinase activity                                                                                                                                     |
| N | B5BG11 | DR | nucleotidyltransferase activity                                                                                                                     |
| N | B5BG11 | DR | phosphotransferase activity, alcohol group as acceptor                                                                                              |
| N | B5BGW2 | CC | One of the primary rRNA binding proteins, it binds directly to 16S rRNA where it nucleates assembly of the body of the 30S subunit (By similarity). |
| N | B5BGW2 | DE | 30S ribosomal protein S4;                                                                                                                           |
| N | B5BGW2 | DR | structural constituent of ribosome                                                                                                                  |
| N | B5BHZ1 | DE | L-threonine 3-dehydrogenase;                                                                                                                        |
| N | B5BHZ1 | DR | L-threonine 3-dehydrogenase activity                                                                                                                |
| N | B5BHZ1 | DR | oxidation-reduction process                                                                                                                         |
| N | B5BHZ1 | DR | threonine catabolic process                                                                                                                         |
| N | B5BHZ1 | DR | zinc ion binding                                                                                                                                    |
| N | B5BKH1 | DE | Phosphatidylserine decarboxylase alpha chain;                                                                                                       |
| N | B5BKH1 | DE | Phosphatidylserine decarboxylase beta chain;                                                                                                        |
| N | B5BKH1 | DE | Phosphatidylserine decarboxylase proenzyme;                                                                                                         |
| N | B5BKH1 | DR | phosphatidylserine decarboxylase activity                                                                                                           |

|   |        |    |                                                                                                                                                                                                                      |
|---|--------|----|----------------------------------------------------------------------------------------------------------------------------------------------------------------------------------------------------------------------|
| N | B5BKH1 | DR | phospholipid biosynthetic process                                                                                                                                                                                    |
| N | B5E4P1 | CC | Catalyzes the reversible conversion of $\alpha$ -phosphoglycerate into phosphoenolpyruvate                                                                                                                           |
| N | B5E4P1 | CC | It is essential for the degradation of carbohydrates via glycolysis (By similarity).                                                                                                                                 |
| N | B5E4P1 | DE | 2-phospho-D-glycerate hydro-lyase;                                                                                                                                                                                   |
| N | B5E4P1 | DE | 2-phosphoglycerate dehydratase;                                                                                                                                                                                      |
| N | B5E4P1 | DR | magnesium ion binding                                                                                                                                                                                                |
| N | B5E4P1 | DR | phosphopyruvate hydratase activity                                                                                                                                                                                   |
| N | B5E721 | CC | Cell wall formation (By similarity).                                                                                                                                                                                 |
| N | B5E721 | DE | D-Ala-D-Ala ligase;                                                                                                                                                                                                  |
| N | B5E721 | DE | D-alanine--D-alanine ligase;                                                                                                                                                                                         |
| N | B5E721 | DE | D-alanylanine synthetase;                                                                                                                                                                                            |
| N | B5E721 | DR | D-alanine-D-alanine ligase activity                                                                                                                                                                                  |
| N | B5E721 | DR | cellular cell wall organization                                                                                                                                                                                      |
| N | B5E721 | DR | metal ion binding                                                                                                                                                                                                    |
| N | B5E721 | DR | peptidoglycan biosynthetic process                                                                                                                                                                                   |
| N | B5E721 | DR | regulation of cell shape                                                                                                                                                                                             |
| N | B5EB50 | DE | Dihydroorotase;                                                                                                                                                                                                      |
| N | B5EB50 | DR | dihydroorotase activity                                                                                                                                                                                              |
| N | B5EB50 | DR | metal ion binding                                                                                                                                                                                                    |
| N | B5EB50 | DR | pyrimidine nucleotide biosynthetic process                                                                                                                                                                           |
| N | B5EBQ4 | CC | Cell wall formation (By similarity).                                                                                                                                                                                 |
| N | B5EBQ4 | DE | D-Ala-D-Ala ligase;                                                                                                                                                                                                  |
| N | B5EBQ4 | DE | D-alanine--D-alanine ligase;                                                                                                                                                                                         |
| N | B5EBQ4 | DE | D-alanylanine synthetase;                                                                                                                                                                                            |
| N | B5EBQ4 | DR | D-alanine-D-alanine ligase activity                                                                                                                                                                                  |
| N | B5EBQ4 | DR | cellular cell wall organization                                                                                                                                                                                      |
| N | B5EBQ4 | DR | metal ion binding                                                                                                                                                                                                    |
| N | B5EBQ4 | DR | peptidoglycan biosynthetic process                                                                                                                                                                                   |
| N | B5EBQ4 | DR | regulation of cell shape                                                                                                                                                                                             |
| N | B5EE14 | DE | Phosphoribosyl-AMP cyclohydrolase;                                                                                                                                                                                   |
| N | B5EE14 | DR | histidine biosynthetic process                                                                                                                                                                                       |
| N | B5EE14 | DR | phosphoribosyl-AMP cyclohydrolase activity                                                                                                                                                                           |
| N | B5EHX2 | CC | This is one of the proteins that binds to the 5S RNA in the ribosome where it forms part of the central protuberance (By similarity).                                                                                |
| N | B5EHX2 | DE | 50S ribosomal protein L25;                                                                                                                                                                                           |
| N | B5EHX2 | DE | General stress protein CTC;                                                                                                                                                                                          |
| N | B5EHX2 | DR | 5S rRNA binding                                                                                                                                                                                                      |
| N | B5EHX2 | DR | structural constituent of ribosome                                                                                                                                                                                   |
| N | B5EN53 | DE | Phenylalanine--tRNA ligase alpha chain;                                                                                                                                                                              |
| N | B5EN53 | DE | Phenylalanyl-tRNA synthetase alpha chain;                                                                                                                                                                            |
| N | B5EN53 | DR | metal ion binding                                                                                                                                                                                                    |
| N | B5EN53 | DR | phenylalanine-tRNA ligase activity                                                                                                                                                                                   |
| N | B5EN53 | DR | phenylalanyl-tRNA aminoacylation                                                                                                                                                                                     |
| N | B5EXE7 | CC | Phosphorolytic exoribonuclease that removes nucleotide residues following the CCA terminus of tRNA and adds nucleotides to the ends of RNA molecules by using nucleoside diphosphates as substrates (By similarity). |
| N | B5EXE7 | DE | Ribonuclease PH;                                                                                                                                                                                                     |
| N | B5EXE7 | DE | tRNA nucleotidyltransferase;                                                                                                                                                                                         |
| N | B5EXE7 | DR | 3'-5'-exoribonuclease activity                                                                                                                                                                                       |
| N | B5EXE7 | DR | tRNA nucleotidyltransferase activity                                                                                                                                                                                 |
| N | B5EXE7 | DR | tRNA processing                                                                                                                                                                                                      |
| N | B5EXE7 | DR | tRNA-specific ribonuclease activity                                                                                                                                                                                  |
| N | B5EXZ5 | CC | is required not only for elongation of protein synthesis but also for the initiation of all mRNA translation through initiator tRNA(fMet) aminoacylation (By similarity)                                             |
| N | B5EXZ5 | DE | Methionine--tRNA ligase;                                                                                                                                                                                             |
| N | B5EXZ5 | DE | Methionyl-tRNA synthetase;                                                                                                                                                                                           |
| N | B5EXZ5 | DR | metal ion binding                                                                                                                                                                                                    |
| N | B5EXZ5 | DR | methionine-tRNA ligase activity                                                                                                                                                                                      |
| N | B5EXZ5 | DR | methionyl-tRNA aminoacylation                                                                                                                                                                                        |
| N | B5EZ89 | DE | Leucine--tRNA ligase;                                                                                                                                                                                                |
| N | B5EZ89 | DE | Leucyl-tRNA synthetase;                                                                                                                                                                                              |
| N | B5EZ89 | DR | leucine-tRNA ligase activity                                                                                                                                                                                         |
| N | B5EZ89 | DR | leucyl-tRNA aminoacylation                                                                                                                                                                                           |
| N | B5EZR7 | DE | UPF0115 protein yfcN;                                                                                                                                                                                                |
| N | B5F0U9 | DE | Argininosuccinate lyase;                                                                                                                                                                                             |

|   |        |    |                                                                                                                                                              |
|---|--------|----|--------------------------------------------------------------------------------------------------------------------------------------------------------------|
| N | B5F0U9 | DE | Arginosuccinase;                                                                                                                                             |
| N | B5F0U9 | DR | arginine biosynthetic process via ornithine                                                                                                                  |
| N | B5F0U9 | DR | argininosuccinate lyase activity                                                                                                                             |
| N | B5F3S9 | DE | UPF0745 protein YcgL;                                                                                                                                        |
| N | B5F744 | DE | Dihydrodipicolinate reductase;                                                                                                                               |
| N | B5F744 | DR | diaminopimelate biosynthetic process                                                                                                                         |
| N | B5F744 | DR | dihydrodipicolinate reductase activity                                                                                                                       |
| N | B5F744 | DR | oxidation-reduction process                                                                                                                                  |
| N | B5F941 | DE | Multidrug resistance protein mdtH;                                                                                                                           |
| N | B5F941 | DR | transmembrane transport                                                                                                                                      |
| N | B5FA83 | CC | Involved in mRNA degradation                                                                                                                                 |
| N | B5FA83 | CC | Hydrolyzes single-stranded polyribonucleotides processively in the 3'- to 5'- direction (By similarity).                                                     |
| N | B5FA83 | DE | Polynucleotide phosphorylase;                                                                                                                                |
| N | B5FA83 | DE | Polyribonucleotide nucleotidyltransferase;                                                                                                                   |
| N | B5FA83 | DR | 3'-5'-exoribonuclease activity                                                                                                                               |
| N | B5FA83 | DR | RNA processing                                                                                                                                               |
| N | B5FA83 | DR | mRNA catabolic process                                                                                                                                       |
| N | B5FA83 | DR | polyribonucleotide nucleotidyltransferase activity                                                                                                           |
| N | B5FE06 | CC | Specifically methylates the cytosine at position 1407 (m5C1407) of 16S rRNA (By similarity).                                                                 |
| N | B5FE06 | DE | 16S rRNA m5C1407 methyltransferase;                                                                                                                          |
| N | B5FE06 | DE | Ribosomal RNA small subunit methyltransferase F;                                                                                                             |
| N | B5FE06 | DE | rRNA (cytosine-C(5)-)-methyltransferase rsmF;                                                                                                                |
| N | B5FE06 | DR | rRNA methyltransferase activity                                                                                                                              |
| N | B5FFD2 | CC | Hydrolyzes D-tyrosyl-tRNA(Tyr) into D-tyrosine and free tRNA(Tyr)                                                                                            |
| N | B5FFD2 | CC | Could be a defense mechanism against a harmful effect of D-tyrosine (By similarity)                                                                          |
| N | B5FFD2 | DE | D-tyrosyl-tRNA(Tyr) deacylase;                                                                                                                               |
| N | B5FFD2 | DR | D-amino acid catabolic process                                                                                                                               |
| N | B5FFD2 | DR | hydrolase activity, acting on ester bonds                                                                                                                    |
| N | B5FG08 | CC | Involved in the binding of tRNA to the ribosomes (By similarity).                                                                                            |
| N | B5FG08 | DE | 30S ribosomal protein S10;                                                                                                                                   |
| N | B5FG08 | DR | structural constituent of ribosome                                                                                                                           |
| N | B5FKZ6 | DE | UPF0502 protein yceH;                                                                                                                                        |
| N | B5FL08 | DE | Protein yceI;                                                                                                                                                |
| N | B5FNB9 | CC | Catalyzes the reversible isomerization-deamination of glucosamine 6-phosphate (GlcN6P) to form fructose 6-phosphate (Fru6P) and ammonium ion (By similarity) |
| N | B5FNB9 | DE | GlcN6P deaminase;                                                                                                                                            |
| N | B5FNB9 | DE | Glucosamine-6-phosphate deaminase;                                                                                                                           |
| N | B5FNB9 | DE | Glucosamine-6-phosphate isomerase;                                                                                                                           |
| N | B5FNB9 | DR | N-acetylglucosamine metabolic process                                                                                                                        |
| N | B5FNB9 | DR | glucosamine-6-phosphate deaminase activity                                                                                                                   |
| N | B5FNB9 | DR | hydrolase activity                                                                                                                                           |
| N | B5FP61 | CC | Catalyzes the conversion of dethiobiotin (DTB) to biotin by the insertion of a sulfur atom into dethiobiotin via a radical- based mechanism (By similarity). |
| N | B5FP61 | DE | Biotin synthase;                                                                                                                                             |
| N | B5FP61 | DR | 2 iron, 2 sulfur cluster binding                                                                                                                             |
| N | B5FP61 | DR | 4 iron, 4 sulfur cluster binding                                                                                                                             |
| N | B5FP61 | DR | biotin biosynthetic process                                                                                                                                  |
| N | B5FP61 | DR | biotin synthase activity                                                                                                                                     |
| N | B5FP61 | DR | metal ion binding                                                                                                                                            |
| N | B5FPS9 | DE | Triose-phosphate isomerase;                                                                                                                                  |
| N | B5FPS9 | DE | Triosephosphate isomerase;                                                                                                                                   |
| N | B5FPS9 | DR | gluconeogenesis                                                                                                                                              |
| N | B5FPS9 | DR | pentose-phosphate shunt                                                                                                                                      |
| N | B5FPS9 | DR | triose-phosphate isomerase activity                                                                                                                          |
| N | B5FSX7 | CC | Affects glycogen biosynthesis, gluconeogenesis, cell size and surface properties                                                                             |
| N | B5FSX7 | CC | Acts to inhibit interaction between the Lcd protein and the A subunit of DNA gyrase                                                                          |
| N | B5FSX7 | CC | Also required for motility and flagellum biosynthesis through the post-transcriptional activation of flhDC expression                                        |
| N | B5FSX7 | CC | Regulates glycogen synthesis under both aerobic and anaerobic conditions                                                                                     |
| N | B5FSX7 | CC | Seems to accelerate the degradation of glg gene transcripts, potentially through selective RNA binding                                                       |
| N | B5FSX7 | CC | This involves binding to and stabilization of the mldC message by CstA (By similarity)                                                                       |
| N | B5FSX7 | DE | Carbon storage regulator;                                                                                                                                    |

|   |        |    |                                                                                                                                                                                                              |
|---|--------|----|--------------------------------------------------------------------------------------------------------------------------------------------------------------------------------------------------------------|
| N | B5FSX7 | DR | mRNA catabolic process                                                                                                                                                                                       |
| N | B5FSX7 | DR | regulation of carbohydrate metabolic process                                                                                                                                                                 |
| N | B5QV77 | CC | Modulates recA activity (By similarity).                                                                                                                                                                     |
| N | B5QV77 | DE | Regulatory protein recX;                                                                                                                                                                                     |
| N | B5QV77 | DR | regulation of DNA repair                                                                                                                                                                                     |
| N | B5QXR2 | CC | Provides the (R)-glutamate required for cell wall biosynthesis (By similarity).                                                                                                                              |
| N | B5QXR2 | DE | Glutamate racemase;                                                                                                                                                                                          |
| N | B5QXR2 | DR | cellular cell wall organization                                                                                                                                                                              |
| N | B5QXR2 | DR | glutamate racemase activity                                                                                                                                                                                  |
| N | B5QXR2 | DR | peptidoglycan biosynthetic process                                                                                                                                                                           |
| N | B5QXR2 | DR | regulation of cell shape                                                                                                                                                                                     |
| N | B5QY87 | CC | Could be a mediator in iron transactions between iron acquisition and iron-requiring processes, such as synthesis and/or repair of Fe-S clusters in biosynthetic enzymes (By similarity).                    |
| N | B5QY87 | DE | Probable Fe(2+)-trafficking protein;                                                                                                                                                                         |
| N | B5QY87 | DR | iron ion binding                                                                                                                                                                                             |
| N | B5QZW4 | CC | Catalyzes the conversion of glucosamine-6-phosphate to glucosamine-1-phosphate (By similarity).                                                                                                              |
| N | B5QZW4 | DE | Phosphoglucosamine mutase;                                                                                                                                                                                   |
| N | B5QZW4 | DR | carbohydrate metabolic process                                                                                                                                                                               |
| N | B5QZW4 | DR | magnesium ion binding                                                                                                                                                                                        |
| N | B5QZW4 | DR | phosphoglucosamine mutase activity                                                                                                                                                                           |
| N | B5R273 | CC | Catalyzes the deformylation of 4-deoxy-4-formamido-L- arabinose-phosphoundecaprenol to 4-amino-4-deoxy-L-arabinose- phosphoundecaprenol                                                                      |
| N | B5R273 | CC | The modified arabinose is attached to lipid A and is required for resistance to polymyxin and cationic antimicrobial peptides (By similarity).                                                               |
| N | B5R273 | DE | Probable 4-deoxy-4-formamido-L-arabinose-phosphoundecaprenol deformylase                                                                                                                                     |
| N | B5R273 | DR | hydrolase activity, acting on carbon-nitrogen (but not peptide) bonds, in linear amides                                                                                                                      |
| N | B5R273 | DR | lipid A biosynthetic process                                                                                                                                                                                 |
| N | B5R273 | DR | response to antibiotic                                                                                                                                                                                       |
| N | B5R2B3 | DE | UPF0270 protein yheU;                                                                                                                                                                                        |
| N | B5R5G1 | DE | 50S ribosomal protein L28;                                                                                                                                                                                   |
| N | B5R5G1 | DR | structural constituent of ribosome                                                                                                                                                                           |
| N | B5RAT3 | CC | Participates in cysteine desulfuration mediated by sufS                                                                                                                                                      |
| N | B5RAT3 | CC | Cysteine desulfuration mobilizes sulfur from L-cysteine to yield L-alanine and constitutes an essential step in sulfur metabolism for biosynthesis of a variety of sulfur-containing biomolecules            |
| N | B5RAT3 | CC | Functions as a sulfur acceptor for sufS, by mediating the direct transfer of the sulfur atom from the S-sulfanyleysteine of sufS, an intermediate product of cysteine desulfuration process (By similarity). |
| N | B5RAT3 | DE | Cysteine desulfuration protein sufE;                                                                                                                                                                         |
| N | B5RB01 | CC | Catalyzes the transamination of N(2)-succinylornithine and alpha-ketoglutarate into N(2)-succinylglutamate semialdehyde and glutamate                                                                        |
| N | B5RB01 | CC | Can also act as an acetylornithine aminotransferase (By similarity).                                                                                                                                         |
| N | B5RB01 | DE | Succinylornithine aminotransferase;                                                                                                                                                                          |
| N | B5RB01 | DE | Succinylornithine transaminase;                                                                                                                                                                              |
| N | B5RB01 | DR | arginine metabolic process                                                                                                                                                                                   |
| N | B5RB01 | DR | pyridoxal phosphate binding                                                                                                                                                                                  |
| N | B5RB01 | DR | succinylornithine transaminase activity                                                                                                                                                                      |
| N | B5RCY8 | CC | GTPase that plays an essential role in the late steps of ribosome biogenesis (By similarity).                                                                                                                |
| N | B5RCY8 | DE | GTP-binding protein EngA;                                                                                                                                                                                    |
| N | B5RCY8 | DR | ribosome biogenesis                                                                                                                                                                                          |
| N | B5RGC1 | DE | Protein ApaG;                                                                                                                                                                                                |
| N | B5RGN1 | CC | Catalyzes the NADPH-dependent reduction of glyoxylate and hydroxypyruvate into glycolate and glycerate, respectively (By similarity).                                                                        |
| N | B5RGN1 | DE | Glyoxylate/hydroxypyruvate reductase B;                                                                                                                                                                      |
| N | B5RGN1 | DR | glyoxylate reductase (NADP) activity                                                                                                                                                                         |
| N | B5RGN1 | DR | hydroxypyruvate reductase activity                                                                                                                                                                           |
| N | B5RGN1 | DR | oxidation-reduction process                                                                                                                                                                                  |
| N | B5RH19 | CC | Protein S19 forms a complex with S13 that binds strongly to the 16S ribosomal RNA (By similarity).                                                                                                           |
| N | B5RH19 | DE | 30S ribosomal protein S19;                                                                                                                                                                                   |
| N | B5RH19 | DR | structural constituent of ribosome                                                                                                                                                                           |
| N | B5RHG5 | CC | Involved in saturated fatty acids biosynthesis (By similarity).                                                                                                                                              |

|   |        |    |                                                                                                                                                                                                       |
|---|--------|----|-------------------------------------------------------------------------------------------------------------------------------------------------------------------------------------------------------|
| N | B5RHG5 | DE | (3R)-hydroxymyristoyl ACP dehydrase;                                                                                                                                                                  |
| N | B5RHG5 | DE | (3R)-hydroxymyristoyl-[acyl-carrier-protein] dehydratase;                                                                                                                                             |
| N | B5RHG5 | DR | fatty acid biosynthetic process                                                                                                                                                                       |
| N | B5RHG5 | DR | hydro-lyase activity                                                                                                                                                                                  |
| N | B5RHG5 | DR | lipid A biosynthetic process                                                                                                                                                                          |
| N | B5RKW3 | CC | modifies the free amino group of the aminoacyl moiety of methionyl-tRNA (P.M.A.)                                                                                                                      |
| N | B5RKW3 | CC | The formyl group appears to play a dual role in the initiator identity of N-formylmethionyl-tRNA by: (I) promoting its recognition by IF2 and (II) impairing its binding to EFTu-GTP (By similarity). |
| N | B5RKW3 | DE | Methionyl-tRNA formyltransferase;                                                                                                                                                                     |
| N | B5RKW3 | DR | methionyl-tRNA formyltransferase activity                                                                                                                                                             |
| N | B5RKW3 | DR | methyltransferase activity                                                                                                                                                                            |
| N | B5RPI6 | CC | Protein S19 forms a complex with S13 that binds strongly to the 16S ribosomal RNA (By similarity).                                                                                                    |
| N | B5RPI6 | DE | 30S ribosomal protein S19;                                                                                                                                                                            |
| N | B5RPI6 | DR | structural constituent of ribosome                                                                                                                                                                    |
| N | B5RQP3 | CC | modifies the free amino group of the aminoacyl moiety of methionyl-tRNA (P.M.A.)                                                                                                                      |
| N | B5RQP3 | CC | The formyl group appears to play a dual role in the initiator identity of N-formylmethionyl-tRNA by: (I) promoting its recognition by IF2 and (II) impairing its binding to EFTu-GTP (By similarity). |
| N | B5RQP3 | DE | Methionyl-tRNA formyltransferase;                                                                                                                                                                     |
| N | B5RQP3 | DR | methionyl-tRNA formyltransferase activity                                                                                                                                                             |
| N | B5RQP3 | DR | methyltransferase activity                                                                                                                                                                            |
| N | B5XKU4 | DE | 5-enolpyruvylshikimate-3-phosphate phospholyase;                                                                                                                                                      |
| N | B5XKU4 | DE | Chorismate synthase;                                                                                                                                                                                  |
| N | B5XKU4 | DR | aromatic amino acid family biosynthetic process                                                                                                                                                       |
| N | B5XKU4 | DR | chorismate synthase activity                                                                                                                                                                          |
| N | B5XNM4 | CC | Catalyzes the synthesis of GMP from XMP (By similarity).                                                                                                                                              |
| N | B5XNM4 | DE | GMP synthase [glutamine-hydrolyzing];                                                                                                                                                                 |
| N | B5XNM4 | DE | GMP synthetase;                                                                                                                                                                                       |
| N | B5XNM4 | DE | Glutamine amidotransferase;                                                                                                                                                                           |
| N | B5XNM4 | DR | GMP biosynthetic process                                                                                                                                                                              |
| N | B5XNM4 | DR | GMP synthase (glutamine-hydrolyzing) activity                                                                                                                                                         |
| N | B5XNM4 | DR | glutamine metabolic process                                                                                                                                                                           |
| N | B5XS09 | CC | Catalyzes the decarboxylation of orotidine 5'- monophosphate (OMP) to uridine 5'-monophosphate (UMP) (By similarity).                                                                                 |
| N | B5XS09 | DE | OMP decarboxylase;                                                                                                                                                                                    |
| N | B5XS09 | DE | Orotidine 5'-phosphate decarboxylase;                                                                                                                                                                 |
| N | B5XS09 | DR | 'de novo' UMP biosynthetic process                                                                                                                                                                    |
| N | B5XS09 | DR | 'de novo' pyrimidine base biosynthetic process                                                                                                                                                        |
| N | B5XS09 | DR | orotidine-5'-phosphate decarboxylase activity                                                                                                                                                         |
| N | B5XYH9 | CC | required, probably indirectly, for the hydroxylation of 2-octaprenylphenol to 2-octaprenyl-6-hydroxy-phenol, the fourth step in ubiquinone biosynthesis (By similarity)                               |
| N | B5XYH9 | DE | Probable ubiquinone biosynthesis protein UbiB;                                                                                                                                                        |
| N | B5XYH9 | DR | ubiquinone biosynthetic process                                                                                                                                                                       |
| N | B5Y1W2 | CC | Catalyzes the condensation of the acetyl group of acetyl-CoA with 3-methyl-2-oxobutanoate (2-oxoisovalerate) to form 3-carboxy-3-hydroxy-4-methylpentanoate (2-isopropylmalate) (By similarity).      |
| N | B5Y1W2 | DE | 2-isopropylmalate synthase;                                                                                                                                                                           |
| N | B5Y1W2 | DE | Alpha-IPM synthase;                                                                                                                                                                                   |
| N | B5Y1W2 | DE | Alpha-isopropylmalate synthase;                                                                                                                                                                       |
| N | B5Y1W2 | DR | 2-isopropylmalate synthase activity                                                                                                                                                                   |
| N | B5Y1W2 | DR | leucine biosynthetic process                                                                                                                                                                          |
| N | B5Y6G9 | CC | Catalyzes the hydrolysis of pseudouridine 5'-phosphate (PsiMP) to ribose 5-phosphate and uracil (By similarity).                                                                                      |
| N | B5Y6G9 | DE | Pseudouridine-5'-phosphate glycosidase;                                                                                                                                                               |
| N | B5Y6G9 | DE | PsiMP glycosidase;                                                                                                                                                                                    |
| N | B5Y6G9 | DR | hydrolase activity, acting on glycosyl bonds                                                                                                                                                          |
| N | B5Y6G9 | DR | metal ion binding                                                                                                                                                                                     |
| N | B5YDT8 | CC | With S4 and S5 plays an important role in translational accuracy (By similarity).                                                                                                                     |
| N | B5YDT8 | DE | 30S ribosomal protein S12;                                                                                                                                                                            |
| N | B5YDT8 | DR | structural constituent of ribosome                                                                                                                                                                    |
| N | B5YER5 | DE | Phenylalanine--tRNA ligase alpha chain;                                                                                                                                                               |
| N | B5YER5 | DE | Phenylalanyl-tRNA synthetase alpha chain;                                                                                                                                                             |
| N | B5YER5 | DR | metal ion binding                                                                                                                                                                                     |

|   |        |    |                                                                                                                                                                                                                                                                                                  |
|---|--------|----|--------------------------------------------------------------------------------------------------------------------------------------------------------------------------------------------------------------------------------------------------------------------------------------------------|
| N | B5YER5 | DR | phenylalanine-tRNA ligase activity                                                                                                                                                                                                                                                               |
| N | B5YER5 | DR | phenylalanyl-tRNA aminoacylation                                                                                                                                                                                                                                                                 |
| N | B5YEW7 | CC | Binds as a heterodimer with protein S6 to the central domain of the 16S rRNA, where it helps stabilize the platform of the 30S subunit (By similarity).                                                                                                                                          |
| N | B5YEW7 | DE | 30S ribosomal protein S18;                                                                                                                                                                                                                                                                       |
| N | B5YEW7 | DR | structural constituent of ribosome                                                                                                                                                                                                                                                               |
| N | B5YHT9 | CC | Associates with free 30S ribosomal subunits (but not with 30S subunits that are part of 70S ribosomes or polysomes)                                                                                                                                                                              |
| N | B5YHT9 | CC | Essential for efficient processing of 16S rRNA                                                                                                                                                                                                                                                   |
| N | B5YHT9 | CC | May interact with the 5'-terminal helix region of 16S rRNA (By similarity).                                                                                                                                                                                                                      |
| N | B5YHT9 | DE | Ribosome-binding factor A;                                                                                                                                                                                                                                                                       |
| N | B5YHT9 | DR | rRNA processing                                                                                                                                                                                                                                                                                  |
| N | B5YI20 | CC | F(1)F(0) ATP synthase produces ATP from ADP in the presence of a proton or sodium gradient                                                                                                                                                                                                       |
| N | B5YI20 | CC | During catalysis, ATP synthesis in the catalytic domain of F(1) is coupled via a rotary mechanism of the central stalk subunits to proton translocation (By similarity)                                                                                                                          |
| N | B5YI20 | CC | F-type ATPases consist of two structural domains, F(1) containing the extramembraneous catalytic core and F(0) containing the membrane proton channel, linked together by a central stalk and a peripheral stalk                                                                                 |
| N | B5YI20 | DE | ATP synthase F(0) sector subunit b;                                                                                                                                                                                                                                                              |
| N | B5YI20 | DE | ATP synthase subunit b;                                                                                                                                                                                                                                                                          |
| N | B5YI20 | DE | ATPase subunit I;                                                                                                                                                                                                                                                                                |
| N | B5YI20 | DE | F-ATPase subunit b;                                                                                                                                                                                                                                                                              |
| N | B5YI20 | DE | F-type ATPase subunit b;                                                                                                                                                                                                                                                                         |
| N | B5YI20 | DR | ATP synthesis coupled proton transport                                                                                                                                                                                                                                                           |
| N | B5YI20 | DR | hydrogen ion transmembrane transporter activity                                                                                                                                                                                                                                                  |
| N | B5YKK9 | CC | Plays an important role in the de novo pathway of purine nucleotide biosynthesis                                                                                                                                                                                                                 |
| N | B5YKK9 | CC | Catalyzes the first committed step in the biosynthesis of AMP from IMP (By similarity)                                                                                                                                                                                                           |
| N | B5YKK9 | DE | Adenylosuccinate synthetase;                                                                                                                                                                                                                                                                     |
| N | B5YKK9 | DE | IMP--aspartate ligase;                                                                                                                                                                                                                                                                           |
| N | B5YKK9 | DR | adenylosuccinate synthase activity                                                                                                                                                                                                                                                               |
| N | B5YKK9 | DR | magnesium ion binding                                                                                                                                                                                                                                                                            |
| N | B5YKK9 | DR | purine nucleotide biosynthetic process                                                                                                                                                                                                                                                           |
| N | B5YKM8 | DE | Protease HtpX homolog;                                                                                                                                                                                                                                                                           |
| N | B5YKM8 | DR | metal ion binding                                                                                                                                                                                                                                                                                |
| N | B5YKM8 | DR | metalloendopeptidase activity                                                                                                                                                                                                                                                                    |
| N | B5YT52 | CC | Activates KDO (a required 8-carbon sugar) for incorporation into bacterial lipopolysaccharide in Gram-negative bacteria (By similarity).                                                                                                                                                         |
| N | B5YT52 | DE | 3-deoxy-manno-octulosonate cytidylyltransferase;                                                                                                                                                                                                                                                 |
| N | B5YT52 | DE | CMP-2-keto-3-deoxyoctulosonic acid synthase;                                                                                                                                                                                                                                                     |
| N | B5YT52 | DE | CMP-KDO synthase;                                                                                                                                                                                                                                                                                |
| N | B5YT52 | DR | 3-deoxy-manno-octulosonate cytidylyltransferase activity                                                                                                                                                                                                                                         |
| N | B5YT52 | DR | lipopolysaccharide biosynthetic process                                                                                                                                                                                                                                                          |
| N | B5YX01 | CC | General inhibitor of pancreatic serine proteases: trypsin, chymotrypsin, trypsin, elastases, factor X, kallikrein as well as a variety of other proteases (By similarity)                                                                                                                        |
| N | B5YX01 | DR | serine-type endopeptidase inhibitor activity                                                                                                                                                                                                                                                     |
| N | B5YXA8 | CC | RNaseP catalyzes the removal of the 5'-leader sequence from pre-tRNA to produce the mature 5'-terminus                                                                                                                                                                                           |
| N | B5YXA8 | CC | It can also cleave other RNA substrates such as 4.5S RNA                                                                                                                                                                                                                                         |
| N | B5YXA8 | CC | The protein component plays an auxiliary but essential role in vivo by binding to the 5'-leader sequence and broadening the substrate specificity of the ribozyme (By similarity)                                                                                                                |
| N | B5YXA8 | DE | RNase P protein;                                                                                                                                                                                                                                                                                 |
| N | B5YXA8 | DE | RNaseP protein;                                                                                                                                                                                                                                                                                  |
| N | B5YXA8 | DE | Ribonuclease P protein component;                                                                                                                                                                                                                                                                |
| N | B5YXA8 | DR | ribonuclease P activity                                                                                                                                                                                                                                                                          |
| N | B5YXA8 | DR | tRNA processing                                                                                                                                                                                                                                                                                  |
| N | B5YY53 | DE | Protein CyaY;                                                                                                                                                                                                                                                                                    |
| N | B5Z008 | CC | Catalyzes the hydrolysis of N-succinyl-L,L- diaminopimelic acid (SDAP), forming succinate and LL-2,6- diaminoheptanedioate (DAP), an intermediate involved in the bacterial biosynthesis of lysine and meso-diaminopimelic acid, an essential component of bacterial cell walls (By similarity). |
| N | B5Z008 | DE | N-succinyl-LL-2,6-diaminoheptanedioate amidohydrolase;                                                                                                                                                                                                                                           |
| N | B5Z008 | DE | SDAP desuccinylase;                                                                                                                                                                                                                                                                              |
| N | B5Z008 | DE | Succinyl-diaminopimelate desuccinylase;                                                                                                                                                                                                                                                          |
| N | B5Z008 | DR | diaminopimelate biosynthetic process                                                                                                                                                                                                                                                             |



|   |        |    |                                                                                                                                                                                                               |
|---|--------|----|---------------------------------------------------------------------------------------------------------------------------------------------------------------------------------------------------------------|
| N | B5Z008 | DR | metal ion binding                                                                                                                                                                                             |
| N | B5Z008 | DR | metallopeptidase activity                                                                                                                                                                                     |
| N | B5Z008 | DR | succinyl-diaminopimelate desuccinylase activity                                                                                                                                                               |
| N | B5Z0W0 | CC | Catalyzes the oxidation of 1-pyrroline, which is spontaneously formed from 4-aminobutanal, leading to 4-aminobutanoate (GABA) (By similarity).                                                                |
| N | B5Z0W0 | DE | 1-pyrroline dehydrogenase;                                                                                                                                                                                    |
| N | B5Z0W0 | DE | 4-aminobutanal dehydrogenase;                                                                                                                                                                                 |
| N | B5Z0W0 | DE | Gamma-aminobutyraldehyde dehydrogenase;                                                                                                                                                                       |
| N | B5Z0W0 | DR | aminobutyraldehyde dehydrogenase activity                                                                                                                                                                     |
| N | B5Z0W0 | DR | oxidation-reduction process                                                                                                                                                                                   |
| N | B5Z0W0 | DR | putrescine catabolic process                                                                                                                                                                                  |
| N | B5Z2U0 | CC | Catalyzes the specific phosphorylation of the 3-hydroxyl group of shikimic acid using ATP as a cosubstrate (By similarity).                                                                                   |
| N | B5Z2U0 | DE | Shikimate kinase 2;                                                                                                                                                                                           |
| N | B5Z2U0 | DR | aromatic amino acid family biosynthetic process                                                                                                                                                               |
| N | B5Z2U0 | DR | metal ion binding                                                                                                                                                                                             |
| N | B5Z2U0 | DR | shikimate kinase activity                                                                                                                                                                                     |
| N | B5Z3X9 | CC | Catalyzes a salvage reaction resulting in the formation of AMP, that is energetically less costly than de novo synthesis (By similarity).                                                                     |
| N | B5Z3X9 | DE | Adenine phosphoribosyltransferase;                                                                                                                                                                            |
| N | B5Z3X9 | DR | adenine phosphoribosyltransferase activity                                                                                                                                                                    |
| N | B5Z3X9 | DR | adenine salvage                                                                                                                                                                                               |
| N | B5Z3X9 | DR | purine ribonucleoside salvage                                                                                                                                                                                 |
| N | B5Z3Y2 | CC | May play a role in DNA repair                                                                                                                                                                                 |
| N | B5Z3Y2 | CC | It may act with recF and recO (By similarity).                                                                                                                                                                |
| N | B5Z3Y2 | CC | it seems to be involved in an $\text{recBC}$ -independent recombinational process of DNA recombination                                                                                                        |
| N | B5Z3Y2 | DE | Recombination protein recR;                                                                                                                                                                                   |
| N | B5Z3Y2 | DR | DNA recombination                                                                                                                                                                                             |
| N | B5Z3Y2 | DR | metal ion binding                                                                                                                                                                                             |
| N | B5Z4C4 | CC | Involved in the anomeric conversion of L-fucose (By similarity).                                                                                                                                              |
| N | B5Z4C4 | DE | Fucose 1-epimerase;                                                                                                                                                                                           |
| N | B5Z4C4 | DE | L-fucose mutarotase;                                                                                                                                                                                          |
| N | B5Z4C4 | DE | Type-2 mutarotase;                                                                                                                                                                                            |
| N | B5Z4C4 | DR | carbohydrate transport                                                                                                                                                                                        |
| N | B5Z4C4 | DR | fucose metabolic process                                                                                                                                                                                      |
| N | B5Z4C4 | DR | racemase and epimerase activity, acting on carbohydrates and derivatives                                                                                                                                      |
| N | B5Z8K3 | CC | This protein promotes the GTP-dependent binding of aminoacyl-tRNA to the A-site of ribosomes during protein biosynthesis (By similarity).                                                                     |
| N | B5Z8K3 | DE | Elongation factor Tu;                                                                                                                                                                                         |
| N | B5Z8K3 | DR | GTPase activity                                                                                                                                                                                               |
| N | B5Z8K3 | DR | translation elongation factor activity                                                                                                                                                                        |
| N | B5Z8L0 | CC | Involved in mRNA degradation                                                                                                                                                                                  |
| N | B5Z8L0 | CC | Hydrolyzes single-stranded polyribonucleotides processively in the 3'- to 5'-direction (By similarity).                                                                                                       |
| N | B5Z8L0 | DE | Polynucleotide phosphorylase;                                                                                                                                                                                 |
| N | B5Z8L0 | DE | Polyribonucleotide nucleotidyltransferase;                                                                                                                                                                    |
| N | B5Z8L0 | DR | 3'-5'-exoribonuclease activity                                                                                                                                                                                |
| N | B5Z8L0 | DR | RNA processing                                                                                                                                                                                                |
| N | B5Z8L0 | DR | mRNA catabolic process                                                                                                                                                                                        |
| N | B5Z8L0 | DR | polyribonucleotide nucleotidyltransferase activity                                                                                                                                                            |
| N | B5Z8U9 | CC | Binds to the 23S rRNA (By similarity).                                                                                                                                                                        |
| N | B5Z8U9 | DE | 50S ribosomal protein L15;                                                                                                                                                                                    |
| N | B5Z8U9 | DR | structural constituent of ribosome                                                                                                                                                                            |
| N | B5ZAS4 | CC | May play a role in DNA repair                                                                                                                                                                                 |
| N | B5ZAS4 | CC | It may act with recF and recO (By similarity).                                                                                                                                                                |
| N | B5ZAS4 | CC | it seems to be involved in an $\text{recBC}$ -independent recombinational process of DNA recombination                                                                                                        |
| N | B5ZAS4 | DE | Recombination protein recR;                                                                                                                                                                                   |
| N | B5ZAS4 | DR | DNA recombination                                                                                                                                                                                             |
| N | B5ZAS4 | DR | metal ion binding                                                                                                                                                                                             |
| N | B5ZBT6 | CC | The ruvA-ruvB complex in the presence of ATP renatures cruciform structure in supercoiled DNA with palindromic sequence, indicating that it may promote strand exchange reactions in homologous recombination |
| N | B5ZBT6 | CC | RuvA stimulates, in the presence of DNA, the weak ATPase activity of ruvB (By similarity).                                                                                                                    |

|   |        |    |                                                                                                                                                                                                                                             |
|---|--------|----|---------------------------------------------------------------------------------------------------------------------------------------------------------------------------------------------------------------------------------------------|
| N | B5ZBT6 | CC | RuvAB is an helicase that mediates the Holliday junction migration by localized denaturation and reannealing                                                                                                                                |
| N | B5ZBT6 | DE | Holliday junction ATP-dependent DNA helicase ruvA;                                                                                                                                                                                          |
| N | B5ZBT6 | DR | DNA recombination                                                                                                                                                                                                                           |
| N | B5ZBT6 | DR | four-way junction helicase activity                                                                                                                                                                                                         |
| N | B5ZPY6 | DE | Anthranilate phosphoribosyltransferase;                                                                                                                                                                                                     |
| N | B5ZPY6 | DR | anthranilate phosphoribosyltransferase activity                                                                                                                                                                                             |
| N | B5ZPY6 | DR | tryptophan biosynthetic process                                                                                                                                                                                                             |
| N | B5ZXQ5 | CC | Required for accurate and efficient protein synthesis under certain stress conditions                                                                                                                                                       |
| N | B5ZXQ5 | CC | Back- translocation proceeds from a post-translocation (POST) complex to a pre-translocation (PRE) complex, thus giving elongation factor G a second chance to translocate the tRNAs correctly                                              |
| N | B5ZXQ5 | CC | Binds to ribosomes in a GTP-dependent manner (By similarity).                                                                                                                                                                               |
| N | B5ZXQ5 | CC | May act as a fidelity factor of the translation reaction, by catalyzing a one-codon backward translocation of tRNAs on improperly translocated ribosomes                                                                                    |
| N | B5ZXQ5 | DE | Elongation factor 4;                                                                                                                                                                                                                        |
| N | B5ZXQ5 | DE | Ribosomal back-translocase LepA;                                                                                                                                                                                                            |
| N | B5ZXQ5 | DR | GTPase activity                                                                                                                                                                                                                             |
| N | B5ZYL3 | CC | NDH-1 shuttles electrons from NADH, via FMN and iron- sulfur (Fe-S) centers, to quinones in the respiratory chain                                                                                                                           |
| N | B5ZYL3 | CC | Couples the redox reaction to proton translocation (for every two electrons transferred, four hydrogen ions are translocated across the cytoplasmic membrane), and thus conserves the redox energy in a proton gradient (By similarity)     |
| N | B5ZYL3 | CC | The immediate electron acceptor for the enzyme in this species is believed to be ubiquinone                                                                                                                                                 |
| N | B5ZYL3 | DE | NADH dehydrogenase I subunit B;                                                                                                                                                                                                             |
| N | B5ZYL3 | DE | NADH-quinone oxidoreductase subunit B;                                                                                                                                                                                                      |
| N | B5ZYL3 | DE | NDH-1 subunit B;                                                                                                                                                                                                                            |
| N | B5ZYL3 | DR | 4 iron, 4 sulfur cluster binding                                                                                                                                                                                                            |
| N | B5ZYL3 | DR | NADH dehydrogenase (ubiquinone) activity                                                                                                                                                                                                    |
| N | B5ZYL3 | DR | metal ion binding                                                                                                                                                                                                                           |
| N | B5ZYL3 | DR | oxidation-reduction process                                                                                                                                                                                                                 |
| N | B5ZYL3 | DR | quinone binding                                                                                                                                                                                                                             |
| N | B6DCK1 | DE | Toxin-like structure LSTX-A12;                                                                                                                                                                                                              |
| N | B6DCK1 | DE | U1-lycotoxin-Ls1b;                                                                                                                                                                                                                          |
| N | B6EJA3 | CC | The beta subunit is responsible for the synthesis of L- tryptophan from indole and L-serine (By similarity).                                                                                                                                |
| N | B6EJA3 | DE | Tryptophan synthase beta chain;                                                                                                                                                                                                             |
| N | B6EJA3 | DR | pyridoxal phosphate binding                                                                                                                                                                                                                 |
| N | B6EJA3 | DR | tryptophan synthase activity                                                                                                                                                                                                                |
| N | B6EKX9 | DE | UPF0246 protein VSAL_I2547;                                                                                                                                                                                                                 |
| N | B6EQ13 | CC | Catalyzes the oxidation of either pyridoxine 5'-phosphate (PNP) or pyridoxamine 5'-phosphate (PMP) into pyridoxal 5'-phosphate (PLP) (By similarity)                                                                                        |
| N | B6EQ13 | DE | PNP/PMP oxidase;                                                                                                                                                                                                                            |
| N | B6EQ13 | DE | Pyridoxal 5'-phosphate synthase;                                                                                                                                                                                                            |
| N | B6EQ13 | DE | Pyridoxine/pyridoxamine 5'-phosphate oxidase;                                                                                                                                                                                               |
| N | B6EQ13 | DR | oxidation-reduction process                                                                                                                                                                                                                 |
| N | B6EQ13 | DR | pyridoxamine-phosphate oxidase activity                                                                                                                                                                                                     |
| N | B6EQ13 | DR | pyridoxine biosynthetic process                                                                                                                                                                                                             |
| N | B6H460 | CC | Mitochondrial GTPase that catalyzes the GTP-dependent ribosomal translocation step during translation elongation                                                                                                                            |
| N | B6H460 | CC | Catalyzes the coordinated movement of the two tRNA molecules, the mRNA and conformational changes in the ribosome (By similarity).                                                                                                          |
| N | B6H460 | CC | During this step, the ribosome changes from the pre-translocational (PRE) to the post-translocational (POST) state as the newly formed A- site-bound peptidyl-tRNA and P-site-bound deacylated tRNA move to the P and E sites, respectively |
| N | B6H460 | DE | Elongation factor G 1, mitochondrial;                                                                                                                                                                                                       |
| N | B6H460 | DE | Elongation factor G, mitochondrial;                                                                                                                                                                                                         |
| N | B6H460 | DE | Elongation factor G1;                                                                                                                                                                                                                       |
| N | B6H460 | DR | GTPase activity                                                                                                                                                                                                                             |
| N | B6H460 | DR | translation elongation factor activity                                                                                                                                                                                                      |
| N | B6HZJ3 | CC | May be involved in recombination (By similarity).                                                                                                                                                                                           |
| N | B6HZJ3 | DE | Recombination-associated protein rdgC;                                                                                                                                                                                                      |
| N | B6HZJ3 | DR | DNA recombination                                                                                                                                                                                                                           |

|   |        |    |                                                                                                                                                                                                                                                                                                    |
|---|--------|----|----------------------------------------------------------------------------------------------------------------------------------------------------------------------------------------------------------------------------------------------------------------------------------------------------|
| N | B6I1M4 | CC | Required for the timely initiation of chromosomal replication via direct interactions with the dnaA initiator protein (By similarity).                                                                                                                                                             |
| N | B6I1M4 | DE | DnaA initiator-associating protein diaA;                                                                                                                                                                                                                                                           |
| N | B6I1M4 | DR | DNA replication                                                                                                                                                                                                                                                                                    |
| N | B6I1M4 | DR | carbohydrate metabolic process                                                                                                                                                                                                                                                                     |
| N | B6I1M4 | DR | sugar binding                                                                                                                                                                                                                                                                                      |
| N | B6I3Y4 | CC | Responsible for the low-affinity transport of potassium into the cell, with the probable concomitant uptake of protons (symport system) (By similarity).                                                                                                                                           |
| N | B6I3Y4 | DE | Kup system potassium uptake protein;                                                                                                                                                                                                                                                               |
| N | B6I3Y4 | DE | Low affinity potassium transport system protein kup;                                                                                                                                                                                                                                               |
| N | B6I3Y4 | DR | potassium ion transmembrane transporter activity                                                                                                                                                                                                                                                   |
| N | B6I3Y4 | DR | symporter activity                                                                                                                                                                                                                                                                                 |
| N | B6I4P5 | DE | L-rhamnose isomerase;                                                                                                                                                                                                                                                                              |
| N | B6I4P5 | DR | L-rhamnose isomerase activity                                                                                                                                                                                                                                                                      |
| N | B6I4P5 | DR | manganese ion binding                                                                                                                                                                                                                                                                              |
| N | B6I4P5 | DR | rhamnose metabolic process                                                                                                                                                                                                                                                                         |
| N | B6I503 | CC | Represses the expression of the murPQ operon involved in the uptake and degradation of N-acetylmuramic acid (MurNAc)                                                                                                                                                                               |
| N | B6I503 | CC | Binds to two adjacent inverted repeats within the operator region                                                                                                                                                                                                                                  |
| N | B6I503 | CC | MurNAc 6-phosphate, the substrate of murQ, is the specific inducer that weakens binding of murR to the operator (By similarity).                                                                                                                                                                   |
| N | B6I503 | DE | HTH-type transcriptional regulator murR;                                                                                                                                                                                                                                                           |
| N | B6I503 | DE | MurPQ operon repressor;                                                                                                                                                                                                                                                                            |
| N | B6I503 | DR | carbohydrate metabolic process                                                                                                                                                                                                                                                                     |
| N | B6I503 | DR | regulation of transcription, DNA-dependent                                                                                                                                                                                                                                                         |
| N | B6I503 | DR | sequence-specific DNA binding transcription factor activity                                                                                                                                                                                                                                        |
| N | B6I503 | DR | sugar binding                                                                                                                                                                                                                                                                                      |
| N | B6I665 | CC | Probably involved in ribonucleotide reductase function (By similarity).                                                                                                                                                                                                                            |
| N | B6I665 | DE | Protein nrdI;                                                                                                                                                                                                                                                                                      |
| N | B6I7K8 | CC | Catalyzes the thiamine diphosphate-dependent decarboxylation of 2-oxoglutarate and the subsequent addition of the resulting succinic semialdehyde-thiamine pyrophosphate anion to isochorismate to yield 2-succinyl-5-enolpyruvyl-6-hydroxy-3-cyclohexene-1-carboxylate (SEPHCHC) (By similarity). |
| N | B6I7K8 | DE | 2-succinyl-5-enolpyruvyl-6-hydroxy-3-cyclohexene-1-carboxylate synthase;                                                                                                                                                                                                                           |
| N | B6I7K8 | DE | Menaquinone biosynthesis protein menD;                                                                                                                                                                                                                                                             |
| N | B6I7K8 | DE | SEPHCHC synthase;                                                                                                                                                                                                                                                                                  |
| N | B6I7K8 | DR | 2-succinyl-5-enolpyruvyl-6-hydroxy-3-cyclohexene-1-carboxylate synthase activity                                                                                                                                                                                                                   |
| N | B6I7K8 | DR | menaquinone biosynthetic process                                                                                                                                                                                                                                                                   |
| N | B6I7K8 | DR | metal ion binding                                                                                                                                                                                                                                                                                  |
| N | B6I7K8 | DR | thiamine pyrophosphate binding                                                                                                                                                                                                                                                                     |
| N | B6I8L0 | CC | Endonuclease IV plays a role in DNA repair                                                                                                                                                                                                                                                         |
| N | B6I8L0 | CC | It cleaves phosphodiester bonds at apurinic or apyrimidinic sites (AP sites) to produce new 5'-ends that are base-free deoxyribose 5-phosphate residues                                                                                                                                            |
| N | B6I8L0 | CC | It preferentially attacks modified AP sites created by bleomycin and neocarzinostatin (By similarity).                                                                                                                                                                                             |
| N | B6I8L0 | DE | Endodeoxyribonuclease IV;                                                                                                                                                                                                                                                                          |
| N | B6I8L0 | DE | Endonuclease IV;                                                                                                                                                                                                                                                                                   |
| N | B6I8L0 | DE | Probable endonuclease 4;                                                                                                                                                                                                                                                                           |
| N | B6I8L0 | DR | deoxyribonuclease IV (phage-T4-induced) activity                                                                                                                                                                                                                                                   |
| N | B6I8L0 | DR | zinc ion binding                                                                                                                                                                                                                                                                                   |
| N | B6I919 | DE | Dihydroorotate dehydrogenase;                                                                                                                                                                                                                                                                      |
| N | B6I919 | DE | Dihydroorotate oxidase;                                                                                                                                                                                                                                                                            |
| N | B6I919 | DR | 'de novo' pyrimidine base biosynthetic process                                                                                                                                                                                                                                                     |
| N | B6I919 | DR | UMP biosynthetic process                                                                                                                                                                                                                                                                           |
| N | B6I919 | DR | dihydroorotate oxidase activity                                                                                                                                                                                                                                                                    |
| N | B6I919 | DR | oxidation-reduction process                                                                                                                                                                                                                                                                        |
| N | B6IP33 | DE | UPF0178 protein RC1_2062;                                                                                                                                                                                                                                                                          |
| N | B6J853 | CC | Catalyzes the methylthiolation of N6- (dimethylallyl)adenosine (i(6)A), leading to the formation of 2- methylthio-N6-(dimethylallyl)adenosine (ms(2)i(6)A) at position 37 in tRNAs that read codons beginning with uridine (By similarity).                                                        |
| N | B6J853 | DE | (Dimethylallyl)adenosine tRNA methylthiotransferase miaB;                                                                                                                                                                                                                                          |
| N | B6J853 | DE | tRNA-i(6)A37 methylthiotransferase;                                                                                                                                                                                                                                                                |
| N | B6J853 | DR | 4 iron, 4 sulfur cluster binding                                                                                                                                                                                                                                                                   |
| N | B6J853 | DR | metal ion binding                                                                                                                                                                                                                                                                                  |
| N | B6J853 | DR | tRNA modification                                                                                                                                                                                                                                                                                  |

|   |        |    |                                                                                                                                                                                                                                  |
|---|--------|----|----------------------------------------------------------------------------------------------------------------------------------------------------------------------------------------------------------------------------------|
| N | B6J853 | DR | transferase activity                                                                                                                                                                                                             |
| N | B6JCI8 | DE | Dihydrodipicolinate reductase;                                                                                                                                                                                                   |
| N | B6JCI8 | DR | diaminopimelate biosynthetic process                                                                                                                                                                                             |
| N | B6JCI8 | DR | dihydrodipicolinate reductase activity                                                                                                                                                                                           |
| N | B6JCI8 | DR | oxidation-reduction process                                                                                                                                                                                                      |
| N | B6JIP4 | CC | This is one of the proteins that binds to the 5S RNA in the ribosome where it forms part of the central protuberance (By similarity).                                                                                            |
| N | B6JIP4 | DE | 50S ribosomal protein L25;                                                                                                                                                                                                       |
| N | B6JIP4 | DE | General stress protein CTC;                                                                                                                                                                                                      |
| N | B6JIP4 | DR | 5S rRNA binding                                                                                                                                                                                                                  |
| N | B6JIP4 | DR | structural constituent of ribosome                                                                                                                                                                                               |
| N | B6JKP5 | DE | Arginine--tRNA ligase;                                                                                                                                                                                                           |
| N | B6JKP5 | DE | Arginyl-tRNA synthetase;                                                                                                                                                                                                         |
| N | B6JKP5 | DR | arginine-tRNA ligase activity                                                                                                                                                                                                    |
| N | B6JKP5 | DR | arginyl-tRNA aminoacylation                                                                                                                                                                                                      |
| N | B6JN39 | DE | 50S ribosomal protein L10;                                                                                                                                                                                                       |
| N | B6JN39 | DR | ribosome biogenesis                                                                                                                                                                                                              |
| N | B6JN39 | DR | structural constituent of ribosome                                                                                                                                                                                               |
| N | B6JNU2 | CC | Binds specifically to the ssrA RNA (tmRNA) and is required for stable association of ssrA with ribosomes (By similarity).                                                                                                        |
| N | B6JNU2 | DE | SsrA-binding protein;                                                                                                                                                                                                            |
| N | B6K463 | CC | Component of the ERMES/MDM complex, which serves as a molecular tether to connect the endoplasmic reticulum and mitochondria                                                                                                     |
| N | B6K463 | CC | Can associate with the SAM(core) complex as well as the mdm12-mmm1 complex, both involved in late steps of the major beta-barrel assembly pathway, that is responsible for biogenesis of all outer membrane beta-barrel proteins |
| N | B6K463 | CC | Components of this complex are involved in the control of mitochondrial shape and protein biogenesis and may function in phospholipid exchange                                                                                   |
| N | B6K463 | CC | Functions in the tom40-specific route of the assembly of outer membrane beta-barrel proteins, including the association of tom40 with the receptor tom22 and small TOM proteins                                                  |
| N | B6K463 | CC | May act as a switch that shuttles between both complexes and channels precursor proteins into the tom40-specific pathway                                                                                                         |
| N | B6K463 | CC | Plays a role in mitochondrial morphology and in the inheritance of mitochondria (By similarity).                                                                                                                                 |
| N | B6K463 | CC | mdm10 is involved in the late assembly steps of the general translocase of the mitochondrial outer membrane (TOM complex)                                                                                                        |
| N | B6K463 | DE | Mitochondrial distribution and morphology protein 10;                                                                                                                                                                            |
| N | B6K463 | DE | Mitochondrial inheritance component mdm10;                                                                                                                                                                                       |
| N | B6YXJ9 | CC | Catalyzes the production of spermidine from putrescine and decarboxylated S-adenosylmethionine (dcSAM), which serves as an aminopropyl donor (By similarity)                                                                     |
| N | B6YXJ9 | DE | Probable spermidine synthase;                                                                                                                                                                                                    |
| N | B6YXJ9 | DE | Putrescine aminopropyltransferase;                                                                                                                                                                                               |
| N | B6YXJ9 | DR | spermidine biosynthetic process                                                                                                                                                                                                  |
| N | B6YXJ9 | DR | spermidine synthase activity                                                                                                                                                                                                     |
| N | B7GV08 | CC | Participates actively in the response to hyperosmotic and heat shock by preventing the aggregation of stress-denatured proteins and by disaggregating proteins, also in an autonomous, dnaK-independent fashion                  |
| N | B7GV08 | CC | Also involved, together with dnaK and grpE, in the DNA replication of plasmids through activation of initiation proteins (By similarity).                                                                                        |
| N | B7GV08 | CC | GrpE releases ADP from dnaK; ATP binding to dnaK triggers the release of the substrate protein, thus completing the reaction cycle                                                                                               |
| N | B7GV08 | CC | Several rounds of ATP-dependent interactions between dnaJ, dnaK and grpE are required for fully efficient folding                                                                                                                |
| N | B7GV08 | CC | Unfolded proteins bind initially to dnaJ; upon interaction with the dnaJ-bound protein, dnaK hydrolyzes its bound ATP, resulting in the formation of a stable complex                                                            |
| N | B7GV08 | DE | Chaperone protein dnaJ;                                                                                                                                                                                                          |
| N | B7GV08 | DR | DNA replication                                                                                                                                                                                                                  |
| N | B7GV08 | DR | heat shock protein binding                                                                                                                                                                                                       |
| N | B7GV08 | DR | metal ion binding                                                                                                                                                                                                                |
| N | B7GV08 | DR | protein folding                                                                                                                                                                                                                  |
| N | B7GV08 | DR | response to heat                                                                                                                                                                                                                 |
| N | B7GV08 | DR | unfolded protein binding                                                                                                                                                                                                         |
| N | B7GVV0 | CC | Catalyzes the hydrolysis of N(2)-succinylarginine into N(2)-succinylornithine, ammonia and CO(2) (By similarity).                                                                                                                |

|   |        |    |                                                                                                                                                                                                                                                                                                                                                                                              |
|---|--------|----|----------------------------------------------------------------------------------------------------------------------------------------------------------------------------------------------------------------------------------------------------------------------------------------------------------------------------------------------------------------------------------------------|
| N | B7GVV0 | DE | N-succinylarginine dihydrolase;                                                                                                                                                                                                                                                                                                                                                              |
| N | B7GVV0 | DR | N-succinylarginine dihydrolase activity                                                                                                                                                                                                                                                                                                                                                      |
| N | B7GVV0 | DR | arginine metabolic process                                                                                                                                                                                                                                                                                                                                                                   |
| N | B7GWA1 | DE | Cysteine--tRNA ligase;                                                                                                                                                                                                                                                                                                                                                                       |
| N | B7GWA1 | DE | Cysteinyl-tRNA synthetase;                                                                                                                                                                                                                                                                                                                                                                   |
| N | B7GWA1 | DR | cysteine-tRNA ligase activity                                                                                                                                                                                                                                                                                                                                                                |
| N | B7GWA1 | DR | cysteinyl-tRNA aminoacylation                                                                                                                                                                                                                                                                                                                                                                |
| N | B7GWA1 | DR | metal ion binding                                                                                                                                                                                                                                                                                                                                                                            |
| N | B7H746 | CC | Cell wall formation (By similarity).                                                                                                                                                                                                                                                                                                                                                         |
| N | B7H746 | DE | UDP-N-acetylmuramate--L-alanine ligase;                                                                                                                                                                                                                                                                                                                                                      |
| N | B7H746 | DE | UDP-N-acetylmuramoyl-L-alanine synthetase;                                                                                                                                                                                                                                                                                                                                                   |
| N | B7H746 | DR | UDP-N-acetylmuramate-L-alanine ligase activity                                                                                                                                                                                                                                                                                                                                               |
| N | B7H746 | DR | cell division                                                                                                                                                                                                                                                                                                                                                                                |
| N | B7H746 | DR | cellular cell wall organization                                                                                                                                                                                                                                                                                                                                                              |
| N | B7H746 | DR | peptidoglycan biosynthetic process                                                                                                                                                                                                                                                                                                                                                           |
| N | B7H746 | DR | regulation of cell shape                                                                                                                                                                                                                                                                                                                                                                     |
| N | B7HDT6 | CC | One of the essential components for the initiation of protein synthesis                                                                                                                                                                                                                                                                                                                      |
| N | B7HDT6 | CC | Also involved in the hydrolysis of GTP during the formation of the 70S ribosomal complex (By similarity).                                                                                                                                                                                                                                                                                    |
| N | B7HDT6 | CC | Protects formylmethionyl-tRNA from spontaneous hydrolysis and promotes its binding to the 30S ribosomal subunits                                                                                                                                                                                                                                                                             |
| N | B7HDT6 | DE | Translation initiation factor IF-2;                                                                                                                                                                                                                                                                                                                                                          |
| N | B7HDT6 | DR | GTPase activity                                                                                                                                                                                                                                                                                                                                                                              |
| N | B7HDT6 | DR | translation initiation factor activity                                                                                                                                                                                                                                                                                                                                                       |
| N | B7IIS9 | CC | Exchanges the guanine residue with 7-aminomethyl-7- deazaguanine in tRNAs with GU(N) anticodons (tRNA-Asp, -Asn, -His and -Tyr) After this exchange, a cyclopentendiol moiety is attached to the 7-aminomethyl group of 7-deazaguanine, resulting in the hypermodified nucleoside queuosine (Q) (7-(((4,5-cis- dihydroxy-2-cyclopenten-1-yl)amino)methyl)-7- deazaguanosine) (By similarity) |
| N | B7IIS9 | CC | Guanine insertion enzyme;                                                                                                                                                                                                                                                                                                                                                                    |
| N | B7IIS9 | DE | Queuine tRNA-ribosyltransferase;                                                                                                                                                                                                                                                                                                                                                             |
| N | B7IIS9 | DE | tRNA-guanine transglycosylase;                                                                                                                                                                                                                                                                                                                                                               |
| N | B7IIS9 | DR | metal ion binding                                                                                                                                                                                                                                                                                                                                                                            |
| N | B7IIS9 | DR | queuine tRNA-ribosyltransferase activity                                                                                                                                                                                                                                                                                                                                                     |
| N | B7IIS9 | DR | queuosine biosynthetic process                                                                                                                                                                                                                                                                                                                                                               |
| N | B7IL84 | CC | The heterodimer acts as both an ATP-dependent DNA helicase and an ATP-dependent, dual-direction single-stranded exonuclease                                                                                                                                                                                                                                                                  |
| N | B7IL84 | CC | Recognizes the chi site generating a DNA molecule suitable for the initiation of homologous recombination                                                                                                                                                                                                                                                                                    |
| N | B7IL84 | CC | The AddA nuclease domain is required for chi fragment generation; this subunit has the helicase and 3' -> 5' nuclease activities (By similarity).                                                                                                                                                                                                                                            |
| N | B7IL84 | DE | ATP-dependent helicase/nuclease AddA;                                                                                                                                                                                                                                                                                                                                                        |
| N | B7IL84 | DE | ATP-dependent helicase/nuclease subunit A;                                                                                                                                                                                                                                                                                                                                                   |
| N | B7IL84 | DR | ATP-dependent DNA helicase activity                                                                                                                                                                                                                                                                                                                                                          |
| N | B7IL84 | DR | double-strand break repair                                                                                                                                                                                                                                                                                                                                                                   |
| N | B7IL84 | DR | exonuclease activity                                                                                                                                                                                                                                                                                                                                                                         |
| N | B7ILE8 | CC | Asymmetrically hydrolyzes Ap4p to yield AMP and ATP (By similarity).                                                                                                                                                                                                                                                                                                                         |
| N | B7ILE8 | DE | Ap4A hydrolase;                                                                                                                                                                                                                                                                                                                                                                              |
| N | B7ILE8 | DE | Bis(5'-nucleosyl)-tetraphosphatase prpE [asymmetrical];                                                                                                                                                                                                                                                                                                                                      |
| N | B7ILE8 | DE | Diadenosine 5',5'''-P1,P4-tetraphosphate asymmetrical hydrolase;                                                                                                                                                                                                                                                                                                                             |
| N | B7ILE8 | DE | Diadenosine tetraphosphatase;                                                                                                                                                                                                                                                                                                                                                                |
| N | B7ILE8 | DR | bis(5'-nucleosyl)-tetraphosphatase (asymmetrical) activity                                                                                                                                                                                                                                                                                                                                   |
| N | B7IS38 | DE | UPF0133 protein BCG9842_B5293;                                                                                                                                                                                                                                                                                                                                                               |
| N | B7ISJ0 | DE | Imidazolone-5-propionate hydrolase;                                                                                                                                                                                                                                                                                                                                                          |
| N | B7ISJ0 | DE | Imidazolonepropionase;                                                                                                                                                                                                                                                                                                                                                                       |
| N | B7ISJ0 | DR | histidine catabolic process to glutamate and formamide                                                                                                                                                                                                                                                                                                                                       |
| N | B7ISJ0 | DR | imidazolonepropionase activity                                                                                                                                                                                                                                                                                                                                                               |
| N | B7ISJ0 | DR | metal ion binding                                                                                                                                                                                                                                                                                                                                                                            |
| N | B7IT28 | CC | One of the primary rRNA binding proteins, it binds specifically to the 5'-end of 16S ribosomal RNA (By similarity).                                                                                                                                                                                                                                                                          |
| N | B7IT28 | DE | 30S ribosomal protein S17;                                                                                                                                                                                                                                                                                                                                                                   |
| N | B7IT28 | DR | structural constituent of ribosome                                                                                                                                                                                                                                                                                                                                                           |
| N | B7JOP3 | CC | This protein is involved in the repair of mismatches in DNA                                                                                                                                                                                                                                                                                                                                  |
| N | B7JOP3 | CC | It is possible that it carries out the mismatch recognition step                                                                                                                                                                                                                                                                                                                             |
| N | B7JOP3 | CC | This protein has a weak ATPase activity (By similarity).                                                                                                                                                                                                                                                                                                                                     |

|   |        |    |                                                                                                                                                                                                                  |
|---|--------|----|------------------------------------------------------------------------------------------------------------------------------------------------------------------------------------------------------------------|
| N | B7J0P3 | DE | DNA mismatch repair protein mutS;                                                                                                                                                                                |
| N | B7J0P3 | DR | mismatch repair                                                                                                                                                                                                  |
| N | B7J0P3 | DR | mismatched DNA binding                                                                                                                                                                                           |
| N | B7JGN4 | CC | F(1)F(0) ATP synthase produces ATP from ADP in the presence of a proton or sodium gradient                                                                                                                       |
| N | B7JGN4 | CC | During catalysis, ATP synthesis in the catalytic domain of F(1) is coupled via a rotary mechanism of the central stalk subunits to proton translocation (By similarity).                                         |
| N | B7JGN4 | CC | F-type ATPases consist of two structural domains, F(1) containing the extramembraneous catalytic core and F(0) containing the membrane proton channel, linked together by a central stalk and a peripheral stalk |
| N | B7JGN4 | DE | ATP synthase F(0) sector subunit b;                                                                                                                                                                              |
| N | B7JGN4 | DE | ATP synthase subunit b;                                                                                                                                                                                          |
| N | B7JGN4 | DE | ATPase subunit I;                                                                                                                                                                                                |
| N | B7JGN4 | DE | F-ATPase subunit b;                                                                                                                                                                                              |
| N | B7JGN4 | DE | F-type ATPase subunit b;                                                                                                                                                                                         |
| N | B7JGN4 | DR | ATP synthesis coupled proton transport                                                                                                                                                                           |
| N | B7JGN4 | DR | hydrogen ion transmembrane transporter activity                                                                                                                                                                  |
| N | B7JGY9 | CC | GTPase that plays an essential role in the late steps of ribosome biogenesis (By similarity).                                                                                                                    |
| N | B7JGY9 | DE | GTP-binding protein EngA;                                                                                                                                                                                        |
| N | B7JGY9 | DR | ribosome biogenesis                                                                                                                                                                                              |
| N | B7JK06 | CC | Specifically methylates the N4 position of cytidine in position 1402 (C1402) of 16S rRNA (By similarity).                                                                                                        |
| N | B7JK06 | DE | 16S rRNA m(4)C1402 methyltransferase;                                                                                                                                                                            |
| N | B7JK06 | DE | Ribosomal RNA small subunit methyltransferase H;                                                                                                                                                                 |
| N | B7JK06 | DE | rRNA (cytosine-N(4)-)-methyltransferase RsmH;                                                                                                                                                                    |
| N | B7JK06 | DR | methyltransferase activity                                                                                                                                                                                       |
| N | B7JK06 | DR | rRNA processing                                                                                                                                                                                                  |
| N | B7JK94 | CC | Converts 4-diphosphocytidyl-2-C-methyl-D-erythritol 2- phosphate into 2-C-methyl-D-erythritol 2,4-cyclodiphosphate (MECDP) and CMP (By similarity).                                                              |
| N | B7JK94 | DE | 2-C-methyl-D-erythritol 2,4-cyclodiphosphate synthase;                                                                                                                                                           |
| N | B7JK94 | DE | MECDP-synthase;                                                                                                                                                                                                  |
| N | B7JK94 | DR | 2-C-methyl-D-erythritol 2,4-cyclodiphosphate synthase activity                                                                                                                                                   |
| N | B7JK94 | DR | metal ion binding                                                                                                                                                                                                |
| N | B7JK94 | DR | terpenoid biosynthetic process                                                                                                                                                                                   |
| N | B7JNF2 | DE | Small, acid-soluble spore protein K;                                                                                                                                                                             |
| N | B7JNF2 | DR | asexual sporulation                                                                                                                                                                                              |
| N | B7JNF2 | DR | sporulation resulting in formation of a cellular spore                                                                                                                                                           |
| N | B7JUZ9 | CC | Binds to the 23S rRNA (By similarity).                                                                                                                                                                           |
| N | B7JUZ9 | DE | 50S ribosomal protein L9;                                                                                                                                                                                        |
| N | B7JUZ9 | DR | structural constituent of ribosome                                                                                                                                                                               |
| N | B7JX56 | DE | Anthranilate phosphoribosyltransferase;                                                                                                                                                                          |
| N | B7JX56 | DR | anthranilate phosphoribosyltransferase activity                                                                                                                                                                  |
| N | B7JX56 | DR | tryptophan biosynthetic process                                                                                                                                                                                  |
| N | B7K1J7 | CC | Component of the cytochrome b6-f complex, which mediates electron transfer between photosystem II (PSII) and photosystem I (PSI), cyclic electron flow around PSI, and state transitions (By similarity).        |
| N | B7K1J7 | DE | Cytochrome b6-f complex subunit 7;                                                                                                                                                                               |
| N | B7K1J7 | DE | Cytochrome b6-f complex subunit VII;                                                                                                                                                                             |
| N | B7K1J7 | DE | Cytochrome b6-f complex subunit petM;                                                                                                                                                                            |
| N | B7K1J7 | DR | electron transport chain                                                                                                                                                                                         |
| N | B7K1J7 | DR | photosynthesis                                                                                                                                                                                                   |
| N | B7K422 | DE | UPF0133 protein PCC8801_2554;                                                                                                                                                                                    |
| N | B7K8U6 | DE | Argininosuccinate lyase;                                                                                                                                                                                         |
| N | B7K8U6 | DE | Arginosuccinase;                                                                                                                                                                                                 |
| N | B7K8U6 | DR | arginine biosynthetic process via ornithine                                                                                                                                                                      |
| N | B7K8U6 | DR | argininosuccinate lyase activity                                                                                                                                                                                 |
| N | B7KCX9 | CC | Plays an important role in the de novo pathway of purine nucleotide biosynthesis                                                                                                                                 |
| N | B7KCX9 | CC | Catalyzes the first committed step in the biosynthesis of AMP from IMP (By similarity).                                                                                                                          |
| N | B7KCX9 | DE | Adenylosuccinate synthetase;                                                                                                                                                                                     |
| N | B7KCX9 | DE | IMP--aspartate ligase;                                                                                                                                                                                           |
| N | B7KCX9 | DR | adenylosuccinate synthase activity                                                                                                                                                                               |
| N | B7KCX9 | DR | magnesium ion binding                                                                                                                                                                                            |
| N | B7KCX9 | DR | purine nucleotide biosynthetic process                                                                                                                                                                           |

|   |        |    |                                                                                                                                                                                                  |
|---|--------|----|--------------------------------------------------------------------------------------------------------------------------------------------------------------------------------------------------|
| N | B7KJX8 | CC | Catalyzes the condensation of the acetyl group of acetyl-CoA with 3-methyl-2-oxobutanoate (2-oxoisovalerate) to form 3-carboxy-3-hydroxy-4-methylpentanoate (2-isopropylmalate) (By similarity). |
| N | B7KJX8 | DE | 2-isopropylmalate synthase;                                                                                                                                                                      |
| N | B7KJX8 | DE | Alpha-IPM synthase;                                                                                                                                                                              |
| N | B7KJX8 | DE | Alpha-isopropylmalate synthase;                                                                                                                                                                  |
| N | B7KJX8 | DR | 2-isopropylmalate synthase activity                                                                                                                                                              |
| N | B7KJX8 | DR | leucine biosynthetic process                                                                                                                                                                     |
| N | B7L0S0 | CC | One of the primary rRNA binding proteins, it binds specifically to the 5'-end of 16S ribosomal RNA (By similarity).                                                                              |
| N | B7L0S0 | DE | 30S ribosomal protein S17;                                                                                                                                                                       |
| N | B7L0S0 | DR | structural constituent of ribosome                                                                                                                                                               |
| N | B7L4C3 | CC | Involved in mRNA degradation                                                                                                                                                                     |
| N | B7L4C3 | CC | Hydrolyzes single-stranded polyribonucleotides processively in the 3' to 5' direction (By similarity).                                                                                           |
| N | B7L4C3 | DE | Exoribonuclease 2;                                                                                                                                                                               |
| N | B7L4C3 | DE | Exoribonuclease II;                                                                                                                                                                              |
| N | B7L4C3 | DE | Ribonuclease II;                                                                                                                                                                                 |
| N | B7L4C3 | DR | RNA catabolic process                                                                                                                                                                            |
| N | B7L4C3 | DR | exoribonuclease II activity                                                                                                                                                                      |
| N | B7LGX2 | CC | Peptide chain release factor 1 directs the termination of translation in response to the peptide chain termination codons UAG and UAA (By similarity).                                           |
| N | B7LGX2 | DE | Peptide chain release factor 1;                                                                                                                                                                  |
| N | B7LGX2 | DR | translation release factor activity, codon specific                                                                                                                                              |
| N | B7LKC4 | DE | Histidine--tRNA ligase;                                                                                                                                                                          |
| N | B7LKC4 | DE | Histidyl-tRNA synthetase;                                                                                                                                                                        |
| N | B7LKC4 | DR | histidine-tRNA ligase activity                                                                                                                                                                   |
| N | B7LKC4 | DR | histidyl-tRNA aminoacylation                                                                                                                                                                     |
| N | B7LLY4 | CC | Binds as a heterodimer with protein S6 to the central domain of the 16S rRNA, where it helps stabilize the platform of the 30S subunit (By similarity).                                          |
| N | B7LLY4 | DE | 30S ribosomal protein S18;                                                                                                                                                                       |
| N | B7LLY4 | DR | structural constituent of ribosome                                                                                                                                                               |
| N | B7LM86 | CC | Conversion of glycerol 3-phosphate to dihydroxyacetone                                                                                                                                           |
| N | B7LM86 | CC | Uses fumarate or nitrate as electron acceptor (By similarity).                                                                                                                                   |
| N | B7LM86 | DE | Anaerobic G-3-P dehydrogenase subunit B;                                                                                                                                                         |
| N | B7LM86 | DE | Anaerobic G3Pdhase B;                                                                                                                                                                            |
| N | B7LM86 | DE | Anaerobic glycerol-3-phosphate dehydrogenase subunit B;                                                                                                                                          |
| N | B7LM86 | DR | electron carrier activity                                                                                                                                                                        |
| N | B7LM86 | DR | oxidation-reduction process                                                                                                                                                                      |
| N | B7LM86 | DR | sn-glycerol-3-phosphate:ubiquinone-8 oxidoreductase activity                                                                                                                                     |
| N | B7LMG5 | CC | bidirectionally degrades single-stranded DNA into large acid-insoluble oligonucleotides, which are then degraded further into small acid-soluble oligonucleotides (By similarity)                |
| N | B7LMG5 | DE | Exodeoxyribonuclease 7 small subunit;                                                                                                                                                            |
| N | B7LMG5 | DE | Exodeoxyribonuclease VII small subunit;                                                                                                                                                          |
| N | B7LMG5 | DE | Exonuclease VII small subunit;                                                                                                                                                                   |
| N | B7LMG5 | DR | DNA catabolic process                                                                                                                                                                            |
| N | B7LMG5 | DR | exodeoxyribonuclease VII activity                                                                                                                                                                |
| N | B7LRL7 | DE | Protein AaeX;                                                                                                                                                                                    |
| N | B7LSC6 | CC | Rhomoid-type serine protease that catalyzes intramembrane proteolysis (By similarity)                                                                                                            |
| N | B7LSC6 | DE | Intramembrane serine protease;                                                                                                                                                                   |
| N | B7LSC6 | DE | Rhomoid protease glpG;                                                                                                                                                                           |
| N | B7LSC6 | DR | serine-type endopeptidase activity                                                                                                                                                               |
| N | B7LWC1 | CC | dGTPase preferentially hydrolyzes dGTP over the other canonical NTPs (By similarity)                                                                                                             |
| N | B7LWC1 | DE | Deoxyguanosinetriphosphate triphosphohydrolase;                                                                                                                                                  |
| N | B7LWC1 | DE | dGTP triphosphohydrolase;                                                                                                                                                                        |
| N | B7LWC1 | DR | GTP metabolic process                                                                                                                                                                            |
| N | B7LWC1 | DR | dGTPase activity                                                                                                                                                                                 |
| N | B7LWC1 | DR | magnesium ion binding                                                                                                                                                                            |
| N | B7LX67 | CC | Negative regulator of phage lambda lysogenization                                                                                                                                                |
| N | B7LX67 | CC | Acts probably by holding CII on the membrane surface, away from the target promoters, but close to the ftsH protease (By similarity).                                                            |
| N | B7LX67 | CC | Contributes to the degradation of the phage regulatory protein CII                                                                                                                               |
| N | B7LX67 | DE | High frequency lysogenization protein hflD;                                                                                                                                                      |
| N | B7LX89 | CC | Cell division inhibitor that blocks the formation of polar Z ring septums                                                                                                                        |
| N | B7LX89 | CC | Prevents ftsZ polymerization (By similarity).                                                                                                                                                    |

|   |        |    |                                                                                                                                                                                                                                                             |
|---|--------|----|-------------------------------------------------------------------------------------------------------------------------------------------------------------------------------------------------------------------------------------------------------------|
| N | B7LX89 | CC | Rapidly oscillates between the poles of the cell to destabilize ftsZ filaments that have formed before they mature into polar Z rings                                                                                                                       |
| N | B7LX89 | DE | Probable septum site-determining protein minC;                                                                                                                                                                                                              |
| N | B7LX89 | DR | barrier septum formation                                                                                                                                                                                                                                    |
| N | B7LX89 | DR | cell morphogenesis                                                                                                                                                                                                                                          |
| N | B7LX89 | DR | regulation of cell cycle                                                                                                                                                                                                                                    |
| N | B7LX89 | DR | regulation of cell division                                                                                                                                                                                                                                 |
| N | B7LXM2 | CC | Catalyzes the 2'-O-methylation at nucleotide C2476 in 23S rRNA (By similarity)                                                                                                                                                                              |
| N | B7LXM2 | DE | 23S rRNA 2'-O-ribose methyltransferase rlmM;                                                                                                                                                                                                                |
| N | B7LXM2 | DE | Ribosomal RNA large subunit methyltransferase M;                                                                                                                                                                                                            |
| N | B7LXM2 | DR | methyltransferase activity                                                                                                                                                                                                                                  |
| N | B7LXM2 | DR | nucleic acid binding                                                                                                                                                                                                                                        |
| N | B7LXM2 | DR | rRNA processing                                                                                                                                                                                                                                             |
| N | B7LY03 | DE | UPF0263 protein yciU;                                                                                                                                                                                                                                       |
| N | B7M0M0 | CC | Multidrug efflux pump that functions probably as a Na <sup>+</sup> /drug antiporter (By similarity)                                                                                                                                                         |
| N | B7M0M0 | DE | Multidrug resistance protein mdtK;                                                                                                                                                                                                                          |
| N | B7M0M0 | DE | Multidrug-efflux transporter;                                                                                                                                                                                                                               |
| N | B7M0M0 | DR | antiporter activity                                                                                                                                                                                                                                         |
| N | B7M0M0 | DR | drug transmembrane transporter activity                                                                                                                                                                                                                     |
| N | B7M0M0 | DR | sodium ion transport                                                                                                                                                                                                                                        |
| N | B7M1F2 | DE | NH(3)-dependent NAD(+) synthetase;                                                                                                                                                                                                                          |
| N | B7M1F2 | DR | NAD biosynthetic process                                                                                                                                                                                                                                    |
| N | B7M1F2 | DR | NAD <sup>+</sup> synthase (glutamine-hydrolyzing) activity                                                                                                                                                                                                  |
| N | B7M1F2 | DR | NAD <sup>+</sup> synthase activity                                                                                                                                                                                                                          |
| N | B7M586 | CC | Catalyzes the last two sequential reactions in the de novo biosynthetic pathway for UDP-GlcNAc responsible for the acetylation of Glc-N-1-P to give GlcNAc-1-P and for the uridyl transfer from UTP to GlcNAc-1-P which produces UDP-GlcNAc (By similarity) |
| N | B7M586 | CC |                                                                                                                                                                                                                                                             |
| N | B7M586 | DE | Bifunctional protein glmU;                                                                                                                                                                                                                                  |
| N | B7M586 | DE | Glucosamine-1-phosphate N-acetyltransferase;                                                                                                                                                                                                                |
| N | B7M586 | DE | N-acetylglucosamine-1-phosphate uridyltransferase;                                                                                                                                                                                                          |
| N | B7M586 | DE | UDP-N-acetylglucosamine pyrophosphorylase;                                                                                                                                                                                                                  |
| N | B7M586 | DR | UDP-N-acetylglucosamine diphosphorylase activity                                                                                                                                                                                                            |
| N | B7M586 | DR | cell morphogenesis                                                                                                                                                                                                                                          |
| N | B7M586 | DR | cellular cell wall organization                                                                                                                                                                                                                             |
| N | B7M586 | DR | glucosamine-1-phosphate N-acetyltransferase activity                                                                                                                                                                                                        |
| N | B7M586 | DR | lipopolysaccharide biosynthetic process                                                                                                                                                                                                                     |
| N | B7M586 | DR | magnesium ion binding                                                                                                                                                                                                                                       |
| N | B7M586 | DR | peptidoglycan biosynthetic process                                                                                                                                                                                                                          |
| N | B7M586 | DR | regulation of cell shape                                                                                                                                                                                                                                    |
| N | B7M7L1 | CC | Catalyzes the synthesis of GMP from XMP (By similarity).                                                                                                                                                                                                    |
| N | B7M7L1 | DE | GMP synthase [glutamine-hydrolyzing];                                                                                                                                                                                                                       |
| N | B7M7L1 | DE | GMP synthetase;                                                                                                                                                                                                                                             |
| N | B7M7L1 | DE | Glutamine amidotransferase;                                                                                                                                                                                                                                 |
| N | B7M7L1 | DR | GMP biosynthetic process                                                                                                                                                                                                                                    |
| N | B7M7L1 | DR | GMP synthase (glutamine-hydrolyzing) activity                                                                                                                                                                                                               |
| N | B7M7L1 | DR | glutamine metabolic process                                                                                                                                                                                                                                 |
| N | B7M826 | DE | Uncharacterized MFS-type transporter ycaD;                                                                                                                                                                                                                  |
| N | B7M826 | DR | transmembrane transport                                                                                                                                                                                                                                     |
| N | B7M826 | DR | transporter activity                                                                                                                                                                                                                                        |
| N | B7MFR2 | CC | Catalyzes the reversible adenylation of nicotinate mononucleotide (NaMN) to nicotinic acid adenine dinucleotide (NaAD) (By similarity).                                                                                                                     |
| N | B7MFR2 | DE | Deamido-NAD(+) diphosphorylase;                                                                                                                                                                                                                             |
| N | B7MFR2 | DE | Deamido-NAD(+) pyrophosphorylase;                                                                                                                                                                                                                           |
| N | B7MFR2 | DE | NaMN adenylyltransferase;                                                                                                                                                                                                                                   |
| N | B7MFR2 | DE | Nicotinate mononucleotide adenylyltransferase;                                                                                                                                                                                                              |
| N | B7MFR2 | DE | Probable nicotinate-nucleotide adenylyltransferase;                                                                                                                                                                                                         |
| N | B7MFR2 | DR | NAD biosynthetic process                                                                                                                                                                                                                                    |
| N | B7MFR2 | DR | nicotinate-nucleotide adenylyltransferase activity                                                                                                                                                                                                          |
| N | B7MHM6 | DE | UPF0434 protein ycaR;                                                                                                                                                                                                                                       |
| N | B7MIQ4 | CC | Required for accurate and efficient protein synthesis under certain stress conditions                                                                                                                                                                       |
| N | B7MIQ4 | CC | Back- translocation proceeds from a post-translocation (POST) complex to a pre-translocation (PRE) complex, thus giving elongation factor G a second chance to translocate the tRNAs correctly                                                              |
| N | B7MIQ4 | CC | Binds to ribosomes in a GTP-dependent manner (By similarity).                                                                                                                                                                                               |



|   |        |    |                                                                                                                                                                                                        |
|---|--------|----|--------------------------------------------------------------------------------------------------------------------------------------------------------------------------------------------------------|
| N | B7MIQ4 | CC | May act as a fidelity factor of the translation reaction, by catalyzing a one-codon backward translocation of tRNAs on improperly translocated ribosomes                                               |
| N | B7MIQ4 | DE | Elongation factor 4;                                                                                                                                                                                   |
| N | B7MIQ4 | DE | Ribosomal back-translocase LepA;                                                                                                                                                                       |
| N | B7MIQ4 | DR | GTPase activity                                                                                                                                                                                        |
| N | B7MJB5 | CC | Cleaves the N-terminal amino acid of tripeptides (By similarity).                                                                                                                                      |
| N | B7MJB5 | DE | Aminotripeptidase;                                                                                                                                                                                     |
| N | B7MJB5 | DE | Peptidase T;                                                                                                                                                                                           |
| N | B7MJB5 | DE | Tripeptidase;                                                                                                                                                                                          |
| N | B7MJB5 | DE | Tripeptide aminopeptidase;                                                                                                                                                                             |
| N | B7MJB5 | DR | metallopeptidase activity                                                                                                                                                                              |
| N | B7MJB5 | DR | peptide metabolic process                                                                                                                                                                              |
| N | B7MJB5 | DR | tripeptide aminopeptidase activity                                                                                                                                                                     |
| N | B7MJB5 | DR | zinc ion binding                                                                                                                                                                                       |
| N | B7MQY8 | CC | Necessary for formate dehydrogenase activity (By similarity).                                                                                                                                          |
| N | B7MQY8 | DE | Protein FdhD;                                                                                                                                                                                          |
| N | B7MQY8 | DR | formate dehydrogenase (NAD <sup>+</sup> ) activity                                                                                                                                                     |
| N | B7MZ67 | CC | Specific inhibitor of chromosomal initiation of replication in vitro                                                                                                                                   |
| N | B7MZ67 | CC | Binds the three 13-mers in the origin (oriC) to block initiation of replication (By similarity).                                                                                                       |
| N | B7MZ67 | DE | Chromosome initiation inhibitor;                                                                                                                                                                       |
| N | B7MZ67 | DE | OriC replication inhibitor;                                                                                                                                                                            |
| N | B7MZ67 | DR | regulation of transcription, DNA-dependent                                                                                                                                                             |
| N | B7MZ67 | DR | sequence-specific DNA binding transcription factor activity                                                                                                                                            |
| N | B7MZK6 | DE | UPF0149 protein ygfB;                                                                                                                                                                                  |
| N | B7N1C2 | CC | One of the primary rRNA binding proteins, it binds directly to 16S rRNA where it nucleates assembly of the head domain of the 30S subunit                                                              |
| N | B7N1C2 | CC | Is located at the subunit interface close to the decoding center, probably blocks exit of the E-site tRNA (By similarity).                                                                             |
| N | B7N1C2 | DE | 30S ribosomal protein S7;                                                                                                                                                                              |
| N | B7N1C2 | DR | structural constituent of ribosome                                                                                                                                                                     |
| N | B7N3C1 | CC | Component of the SOS system and an inhibitor of cell division                                                                                                                                          |
| N | B7N3C1 | CC | Accumulation of sulA causes rapid cessation of cell division and the appearance of long, non-septate filaments                                                                                         |
| N | B7N3C1 | CC | In the presence of GTP, binds a polymerization-competent form of ftsZ in a 1:1 ratio, thus inhibiting ftsZ polymerization and therefore preventing it from participating in the assembly of the Z ring |
| N | B7N3C1 | CC | This mechanism prevents the premature segregation of damaged DNA to daughter cells during cell division (By similarity).                                                                               |
| N | B7N3C1 | DE | Cell division inhibitor sulA;                                                                                                                                                                          |
| N | B7N3C1 | DR | barrier septum formation                                                                                                                                                                               |
| N | B7N3C1 | DR | negative regulation of cell division                                                                                                                                                                   |
| N | B7N3F4 | CC | Interacts with CbpA and inhibits both the DnaJ-like co-chaperone activity and the DNA binding activity of CbpA                                                                                         |
| N | B7N3F4 | CC | Does not inhibit the co-chaperone activity of DnaJ (By similarity).                                                                                                                                    |
| N | B7N3F4 | CC | Together with CbpA, modulates the activity of the DnaK chaperone system                                                                                                                                |
| N | B7N3F4 | DE | Chaperone modulatory protein CbpM;                                                                                                                                                                     |
| N | B7N7R3 | CC | Catalyzes the reversible transfer of the CoA moiety from gamma-butyrobetainyl-CoA to L-carnitine to generate L-carnitiny-CoA and gamma-butyrobetaine                                                   |
| N | B7N7R3 | CC | Is also able to catalyze the reversible transfer of the CoA moiety from gamma-butyrobetainyl-CoA or L-carnitiny-CoA to crotonobetaine to generate crotonobetainyl-CoA (By similarity).                 |
| N | B7N7R3 | DE | Crotonobetainyl-CoA:carnitine CoA-transferase;                                                                                                                                                         |
| N | B7N7R3 | DR | transferase activity                                                                                                                                                                                   |
| N | B7NA78 | CC | The UVABC repair system catalyzes the recognition and processing of DNA lesions                                                                                                                        |
| N | B7NA78 | CC | A damage recognition complex composed of 2 uvrA and 2 uvrB subunits scans DNA for abnormalities                                                                                                        |
| N | B7NA78 | CC | DNA wrap is dependent on ATP binding by uvrB and probably causes local melting of the DNA helix, facilitating insertion of uvrB beta-hairpin between the DNA strands                                   |
| N | B7NA78 | CC | If a lesion is found the uvrA subunits dissociate and the uvrB-DNA preincision complex is formed                                                                                                       |
| N | B7NA78 | CC | If no lesion is found, the DNA wraps around the other uvrB subunit that will check the other stand for damage (By similarity).                                                                         |
| N | B7NA78 | CC | Then uvrB probes one DNA strand for the presence of a lesion                                                                                                                                           |
| N | B7NA78 | CC | This complex is subsequently bound by uvrC and the second uvrB is released                                                                                                                             |

|   |        |    |                                                                                                                                                      |
|---|--------|----|------------------------------------------------------------------------------------------------------------------------------------------------------|
| N | B7NA78 | CC | Upon binding of the uvrA(2)B(2) complex to a putative damaged site, the DNA wraps around one uvrB monomer                                            |
| N | B7NA78 | DE | Excinuclease ABC subunit B;                                                                                                                          |
| N | B7NA78 | DE | Protein uvrB;                                                                                                                                        |
| N | B7NA78 | DE | UvrABC system protein B;                                                                                                                             |
| N | B7NA78 | DR | excinuclease ABC activity                                                                                                                            |
| N | B7NA78 | DR | helicase activity                                                                                                                                    |
| N | B7NA78 | DR | nucleotide-excision repair                                                                                                                           |
| N | B7NA95 | DE | UPF0194 membrane protein ybhG;                                                                                                                       |
| N | B7NA95 | DR | protein secretion                                                                                                                                    |
| N | B7NA95 | DR | protein transporter activity                                                                                                                         |
| N | B7NAJ3 | DE | Putative transport protein YbjL;                                                                                                                     |
| N | B7NAJ3 | DR | cation transmembrane transporter activity                                                                                                            |
| N | B7NAJ3 | DR | potassium ion transport                                                                                                                              |
| N | B7NAQ7 | DE | 3-phosphoshikimate 1-carboxyvinyltransferase;                                                                                                        |
| N | B7NAQ7 | DE | 5-enolpyruvylshikimate-3-phosphate synthase;                                                                                                         |
| N | B7NAQ7 | DE | EPSP synthase;                                                                                                                                       |
| N | B7NAQ7 | DR | 3-phosphoshikimate 1-carboxyvinyltransferase activity                                                                                                |
| N | B7NAQ7 | DR | aromatic amino acid family biosynthetic process                                                                                                      |
| N | B7NAT4 | CC | Catalyzes the oxidative demethylation of N-methyl-L-tryptophan (By similarity)                                                                       |
| N | B7NAT4 | DE | N-methyl-L-tryptophan oxidase;                                                                                                                       |
| N | B7NAT4 | DR | oxidation-reduction process                                                                                                                          |
| N | B7NAT4 | DR | oxidoreductase activity                                                                                                                              |
| N | B7NB92 | CC | Catalyzes the oxidation of either pyridoxine 5'-phosphate (PNP) or pyridoxamine 5'-phosphate (PMP) into pyridoxal 5'-phosphate (PLP) (By similarity) |
| N | B7NB92 | DE | PNP/PMP oxidase;                                                                                                                                     |
| N | B7NB92 | DE | Pyridoxal 5'-phosphate synthase;                                                                                                                     |
| N | B7NB92 | DE | Pyridoxine/pyridoxamine 5'-phosphate oxidase;                                                                                                        |
| N | B7NB92 | DR | oxidation-reduction process                                                                                                                          |
| N | B7NB92 | DR | pyridoxamine-phosphate oxidase activity                                                                                                              |
| N | B7NB92 | DR | pyridoxine biosynthetic process                                                                                                                      |
| N | B7NDD8 | DE | UPF0306 protein yhbP;                                                                                                                                |
| N | B7NDV2 | CC | Part of a sulfur-relay system required for 2-thiolation of 5-methylaminomethyl-2-thiouridine (mm(5)s(2)U) at tRNA wobble positions (By similarity).  |
| N | B7NDV2 | DE | Protein tusC;                                                                                                                                        |
| N | B7NDV2 | DE | tRNA 2-thiouridine synthesizing protein C;                                                                                                           |
| N | B7NDV2 | DR | tRNA processing                                                                                                                                      |
| N | B7NHG8 | CC | Catalyzes the conversion of L-arabinose to L-ribulose (By similarity).                                                                               |
| N | B7NHG8 | DE | L-arabinose isomerase;                                                                                                                               |
| N | B7NHG8 | DR | L-arabinose isomerase activity                                                                                                                       |
| N | B7NHG8 | DR | L-fucose isomerase activity                                                                                                                          |
| N | B7NHG8 | DR | arabinose catabolic process                                                                                                                          |
| N | B7NHG8 | DR | fucose metabolic process                                                                                                                             |
| N | B7NHG8 | DR | metal ion binding                                                                                                                                    |
| N | B7NI79 | DE | UPF0231 protein yacL;                                                                                                                                |
| N | B7NJS2 | CC | Catalyzes the transfer of an acyl group from acyl-ACP to glycerol-3-phosphate (G3P) to form lysophosphatidic acid (LPA)                              |
| N | B7NJS2 | CC | This enzyme can also utilize acyl-CoA as fatty acyl donor, but not acyl-PO(4) (By similarity).                                                       |
| N | B7NJS2 | DE | G3P acyltransferase;                                                                                                                                 |
| N | B7NJS2 | DE | Glycerol-3-phosphate acyltransferase;                                                                                                                |
| N | B7NJS2 | DE | LPA synthase;                                                                                                                                        |
| N | B7NJS2 | DE | Lysophosphatidic acid synthase;                                                                                                                      |
| N | B7NJS2 | DR | glycerol-3-phosphate O-acyltransferase activity                                                                                                      |
| N | B7NJS2 | DR | phospholipid biosynthetic process                                                                                                                    |
| N | B7NK49 | CC | Repressor involved in choline regulation of the bet genes (By similarity).                                                                           |
| N | B7NK49 | DE | HTH-type transcriptional regulator BetI;                                                                                                             |
| N | B7NK49 | DR | regulation of transcription, DNA-dependent                                                                                                           |
| N | B7NK49 | DR | sequence-specific DNA binding transcription factor activity                                                                                          |
| N | B7NK49 | DR | specific transcriptional repressor activity                                                                                                          |
| N | B7NK71 | DE | 50S ribosomal protein L36;                                                                                                                           |
| N | B7NK71 | DR | structural constituent of ribosome                                                                                                                   |
| N | B7NLL0 | CC | Channel that opens in response to stretch forces in the membrane lipid bilayer                                                                       |
| N | B7NLL0 | CC | May participate in the regulation of osmotic pressure changes within the cell (By similarity).                                                       |

|   |        |    |                                                                                                                                                                                                                                                       |
|---|--------|----|-------------------------------------------------------------------------------------------------------------------------------------------------------------------------------------------------------------------------------------------------------|
| N | B7NLL0 | DE | Large-conductance mechanosensitive channel;                                                                                                                                                                                                           |
| N | B7NLL0 | DR | ion channel activity                                                                                                                                                                                                                                  |
| N | B7NPE0 | CC | Reversibly transfers an adenylyl group from ATP to 4'-phosphopantetheine, yielding dephospho-CoA (dPCoA) and pyrophosphate (By similarity).                                                                                                           |
| N | B7NPE0 | DE | Dephospho-CoA pyrophosphorylase;                                                                                                                                                                                                                      |
| N | B7NPE0 | DE | Pantetheine-phosphate adenylyltransferase;                                                                                                                                                                                                            |
| N | B7NPE0 | DE | Phosphopantetheine adenylyltransferase;                                                                                                                                                                                                               |
| N | B7NPE0 | DR | coenzyme A biosynthetic process                                                                                                                                                                                                                       |
| N | B7NPE0 | DR | pantetheine-phosphate adenylyltransferase activity                                                                                                                                                                                                    |
| N | B7NQ04 | CC | Catalyzes the transfer of a ribosyl phosphate group from 5-phosphoribose 1-diphosphate to orotate, leading to the formation of orotidine monophosphate (OMP) (By similarity).                                                                         |
| N | B7NQ04 | DE | Orotate phosphoribosyltransferase;                                                                                                                                                                                                                    |
| N | B7NQ04 | DR | nucleoside metabolic process                                                                                                                                                                                                                          |
| N | B7NQ04 | DR | orotate phosphoribosyltransferase activity                                                                                                                                                                                                            |
| N | B7NQ04 | DR | pyrimidine nucleotide biosynthetic process                                                                                                                                                                                                            |
| N | B7NU33 | CC | Provides the (R)-glutamate required for cell wall biosynthesis (By similarity).                                                                                                                                                                       |
| N | B7NU33 | DE | Glutamate racemase;                                                                                                                                                                                                                                   |
| N | B7NU33 | DR | cellular cell wall organization                                                                                                                                                                                                                       |
| N | B7NU33 | DR | glutamate racemase activity                                                                                                                                                                                                                           |
| N | B7NU33 | DR | peptidoglycan biosynthetic process                                                                                                                                                                                                                    |
| N | B7NU33 | DR | regulation of cell shape                                                                                                                                                                                                                              |
| N | B7PCF6 | CC | Has bacteriostatic activity against Gram-positive bacteria, but not against Gram-negative bacteria                                                                                                                                                    |
| N | B7PCF6 | CC | Binds and sequesters copper and iron ions                                                                                                                                                                                                             |
| N | B7PCF6 | CC | Copper-chelating is crucial for antimicrobial activity against <i>M. luteus</i> (By similarity).                                                                                                                                                      |
| N | B7PCF6 | CC | Has fungistatic activity against some but not all fungi                                                                                                                                                                                               |
| N | B7PCF6 | DE | Antimicrobial peptide microplusin;                                                                                                                                                                                                                    |
| N | B7PCF6 | DR | copper chaperone activity                                                                                                                                                                                                                             |
| N | B7PCF6 | DR | defense response to Gram-positive bacterium                                                                                                                                                                                                           |
| N | B7PCF6 | DR | defense response to fungus                                                                                                                                                                                                                            |
| N | B7PCF6 | DR | innate immune response                                                                                                                                                                                                                                |
| N | B7PCF6 | DR | iron ion binding                                                                                                                                                                                                                                      |
| N | B7PCF6 | DR | killing of cells of other organism                                                                                                                                                                                                                    |
| N | B7PCF6 | DR | metal chelating activity                                                                                                                                                                                                                              |
| N | B7UFS6 | CC | Catalyzes a proton abstraction reaction that results in 2,3-elimination of pyruvate from 2-succinyl-5-enolpyruvyl-6-hydroxy-3-cyclohexene-1-carboxylate (SEPHCHC) and the formation of 2-succinyl-6-hydroxy-2,4-cyclohexadiene-1-carboxylate (SHCHC). |
| N | B7UFS6 | CC | Is also able to catalyze the hydrolysis of the thioester bond in palmitoyl-CoA in vitro (By similarity).                                                                                                                                              |
| N | B7UFS6 | DE | 2-succinyl-6-hydroxy-2,4-cyclohexadiene-1-carboxylate synthase;                                                                                                                                                                                       |
| N | B7UFS6 | DE | SHCHC synthase;                                                                                                                                                                                                                                       |
| N | B7UFS6 | DR | 2-succinyl-6-hydroxy-2,4-cyclohexadiene-1-carboxylate synthase activity                                                                                                                                                                               |
| N | B7UFS6 | DR | menaquinone biosynthetic process                                                                                                                                                                                                                      |
| N | B7UGB2 | CC | DNA ligase that catalyzes the formation of phosphodiester linkages between 5'-phosphoryl and 3'-hydroxyl groups in double-stranded DNA using NAD as a coenzyme and as the energy source for the reaction                                              |
| N | B7UGB2 | CC | It is essential for DNA replication and repair of damaged DNA (By similarity).                                                                                                                                                                        |
| N | B7UGB2 | DE | Polydeoxyribonucleotide synthase [NAD+];                                                                                                                                                                                                              |
| N | B7UGB2 | DR | DNA ligase (NAD+) activity                                                                                                                                                                                                                            |
| N | B7UGB2 | DR | DNA replication                                                                                                                                                                                                                                       |
| N | B7UGB2 | DR | metal ion binding                                                                                                                                                                                                                                     |
| N | B7UHE9 | CC | This protein is involved in the repair of mismatches in DNA                                                                                                                                                                                           |
| N | B7UHE9 | CC | It is possible that it carries out the mismatch recognition step                                                                                                                                                                                      |
| N | B7UHE9 | CC | This protein has a weak ATPase activity (By similarity).                                                                                                                                                                                              |
| N | B7UHE9 | DE | DNA mismatch repair protein mutS;                                                                                                                                                                                                                     |
| N | B7UHE9 | DR | mismatch repair                                                                                                                                                                                                                                       |
| N | B7UHE9 | DR | mismatched DNA binding                                                                                                                                                                                                                                |
| N | B7UHV3 | CC | The glycine cleavage system catalyzes the degradation of glycine (By similarity).                                                                                                                                                                     |
| N | B7UHV3 | DE | Aminomethyltransferase;                                                                                                                                                                                                                               |
| N | B7UHV3 | DE | Glycine cleavage system T protein;                                                                                                                                                                                                                    |
| N | B7UHV3 | DR | aminomethyltransferase activity                                                                                                                                                                                                                       |
| N | B7UHV3 | DR | glycine catabolic process                                                                                                                                                                                                                             |
| N | B7UHV3 | DR | transaminase activity                                                                                                                                                                                                                                 |
| N | B7UK30 | CC | One of the primary rRNA binding proteins, it binds directly to 16S rRNA central domain where it helps coordinate assembly of the platform of the 30S subunit (By similarity).                                                                         |

|   |        |    |                                                                                                                                                                                                                                                                      |
|---|--------|----|----------------------------------------------------------------------------------------------------------------------------------------------------------------------------------------------------------------------------------------------------------------------|
| N | B7UK30 | DE | 30S ribosomal protein S8;                                                                                                                                                                                                                                            |
| N | B7UK30 | DR | structural constituent of ribosome                                                                                                                                                                                                                                   |
| N | B7UKQ6 | CC | Transfers 2-(5"-triphosphoribosyl)-3'- dephosphocoenzyme-A on a serine residue to the apo-acyl carrier protein (gamma chain) of the citrate lyase to yield holo-acyl carrier protein (By similarity).                                                                |
| N | B7UKQ6 | DE | Apo-ACP nucleodityltransferase;                                                                                                                                                                                                                                      |
| N | B7UKQ6 | DE | Holo-ACP synthase;                                                                                                                                                                                                                                                   |
| N | B7UKQ6 | DE | Holo-citrate lyase synthase;                                                                                                                                                                                                                                         |
| N | B7UKQ6 | DE | Probable apo-citrate lyase phosphoribosyl-dephospho-CoA transferase;                                                                                                                                                                                                 |
| N | B7UKQ6 | DR | holo-citrate lyase synthase activity                                                                                                                                                                                                                                 |
| N | B7UKQ6 | DR | prosthetic group biosynthetic process                                                                                                                                                                                                                                |
| N | B7UNU5 | CC | Catalyzes the formation of 5-methyl-uridine at position 54 (M-5-U54) in all tRNAs (By similarity).                                                                                                                                                                   |
| N | B7UNU5 | DE | tRNA (uracil-5-)-methyltransferase;                                                                                                                                                                                                                                  |
| N | B7UNU5 | DE | tRNA(M-5-U54)-methyltransferase;                                                                                                                                                                                                                                     |
| N | B7UNU5 | DR | tRNA (uracil-5-)-methyltransferase activity                                                                                                                                                                                                                          |
| N | B7USA1 | CC | IF-3 binds to the 30S ribosomal subunit and shifts the equilibrium between 70S ribosomes and their 50S and 30S subunits in favor of the free subunits, thus enhancing the availability of 30S subunits on which protein synthesis initiation begins (By similarity). |
| N | B7USA1 | DE | Translation initiation factor IF-3;                                                                                                                                                                                                                                  |
| N | B7USA1 | DR | translation initiation factor activity                                                                                                                                                                                                                               |
| N | B7UWH3 | CC | Catalyzes amidations at positions D, D, E, and G on adenosylcobalamin A,C- dimethyl-.                                                                                                                                                                                |
| N | B7UWH3 | CC | NH(2) groups are provided by glutamine, and one molecule of ATP is hydrogenolyzed for each amidation (By similarity).                                                                                                                                                |
| N | B7UWH3 | DE | Cobyric acid synthase;                                                                                                                                                                                                                                               |
| N | B7UWH3 | DR | catalytic activity                                                                                                                                                                                                                                                   |
| N | B7UWH3 | DR | cobalamin biosynthetic process                                                                                                                                                                                                                                       |
| N | B7UWH3 | DR | glutamine metabolic process                                                                                                                                                                                                                                          |
| N | B7V1Y3 | DE | NH(3)-dependent NAD(+) synthetase;                                                                                                                                                                                                                                   |
| N | B7V1Y3 | DR | NAD biosynthetic process                                                                                                                                                                                                                                             |
| N | B7V1Y3 | DR | NAD+ synthase (glutamine-hydrolyzing) activity                                                                                                                                                                                                                       |
| N | B7V1Y3 | DR | NAD+ synthase activity                                                                                                                                                                                                                                               |
| N | B7V309 | CC | Binds directly to 23S ribosomal RNA and is necessary for the in vitro assembly process of the 50S ribosomal subunit                                                                                                                                                  |
| N | B7V309 | CC | it is not involved in the protein synthesizing functions of that subunit (By similarity).                                                                                                                                                                            |
| N | B7V309 | DE | 50S ribosomal protein L20;                                                                                                                                                                                                                                           |
| N | B7V309 | DR | structural constituent of ribosome                                                                                                                                                                                                                                   |
| N | B7V3H2 | CC | Hydrolyzes D-tyrosyl-tRNA(Tyr) into D-tyrosine and free tRNA(Tyr)                                                                                                                                                                                                    |
| N | B7V3H2 | CC | Could be a defense mechanism against a harmful effect of D-tyrosine (By similarity).                                                                                                                                                                                 |
| N | B7V3H2 | DE | D-tyrosyl-tRNA(Tyr) deacylase;                                                                                                                                                                                                                                       |
| N | B7V3H2 | DR | D-amino acid catabolic process                                                                                                                                                                                                                                       |
| N | B7V3H2 | DR | hydrolase activity, acting on ester bonds                                                                                                                                                                                                                            |
| N | B7V7A1 | CC | Specifically methylates the N7 position of guanosine in position 527 of 16S rRNA (By similarity).                                                                                                                                                                    |
| N | B7V7A1 | DE | 16S rRNA 7-methylguanosine methyltransferase;                                                                                                                                                                                                                        |
| N | B7V7A1 | DE | 16S rRNA m7G methyltransferase;                                                                                                                                                                                                                                      |
| N | B7V7A1 | DE | Ribosomal RNA small subunit methyltransferase G;                                                                                                                                                                                                                     |
| N | B7V7A1 | DR | rRNA methyltransferase activity                                                                                                                                                                                                                                      |
| N | B7VA96 | DE | Homogentisate 1,2-dioxygenase;                                                                                                                                                                                                                                       |
| N | B7VA96 | DE | Homogentisate oxygenase;                                                                                                                                                                                                                                             |
| N | B7VA96 | DE | Homogentisic acid oxidase;                                                                                                                                                                                                                                           |
| N | B7VA96 | DE | Homogentisicase;                                                                                                                                                                                                                                                     |
| N | B7VA96 | DR | L-phenylalanine catabolic process                                                                                                                                                                                                                                    |
| N | B7VA96 | DR | homogentisate 1,2-dioxygenase activity                                                                                                                                                                                                                               |
| N | B7VA96 | DR | metal ion binding                                                                                                                                                                                                                                                    |
| N | B7VA96 | DR | oxidation-reduction process                                                                                                                                                                                                                                          |
| N | B7VA96 | DR | tyrosine catabolic process                                                                                                                                                                                                                                           |
| N | B7VHI0 | CC | Promotes RNA polymerase assembly                                                                                                                                                                                                                                     |
| N | B7VHI0 | CC | Latches the N- and C- terminal regions of the beta' subunit thereby facilitating its interaction with the beta and alpha subunits (By similarity).                                                                                                                   |
| N | B7VHI0 | DE | DNA-directed RNA polymerase subunit omega;                                                                                                                                                                                                                           |
| N | B7VHI0 | DE | RNA polymerase omega subunit;                                                                                                                                                                                                                                        |
| N | B7VHI0 | DE | RNAP omega subunit;                                                                                                                                                                                                                                                  |
| N | B7VHI0 | DE | Transcriptase subunit omega;                                                                                                                                                                                                                                         |
| N | B7VHI0 | DR | DNA-directed RNA polymerase activity                                                                                                                                                                                                                                 |

|   |        |    |                                                                                                                                                                                                                                    |
|---|--------|----|------------------------------------------------------------------------------------------------------------------------------------------------------------------------------------------------------------------------------------|
| N | B7VMJ2 | CC | Involved in the tonB-independent uptake of proteins (By similarity).                                                                                                                                                               |
| N | B7VMJ2 | DE | Protein tolB;                                                                                                                                                                                                                      |
| N | B7VMJ2 | DR | protein import                                                                                                                                                                                                                     |
| N | B8CMW5 | CC | Catalyzes the removal of elemental sulfur from cysteine to produce alanine (By similarity).                                                                                                                                        |
| N | B8CMW5 | DE | Cysteine desulfurase;                                                                                                                                                                                                              |
| N | B8CMW5 | DR | cysteine desulfurase activity                                                                                                                                                                                                      |
| N | B8CMW5 | DR | cysteine metabolic process                                                                                                                                                                                                         |
| N | B8CMW5 | DR | pyridoxal phosphate binding                                                                                                                                                                                                        |
| N | B8CP85 | CC | Participates in the translocation of lipoproteins from the inner membrane to the outer membrane                                                                                                                                    |
| N | B8CP85 | CC | Only forms a complex with a lipoprotein if the residue after the N-terminal Cys is not an aspartate (The Asp acts as a targeting signal to indicate that the lipoprotein should stay in the inner membrane) (By similarity).       |
| N | B8CP85 | DE | Outer-membrane lipoprotein carrier protein;                                                                                                                                                                                        |
| N | B8CP85 | DR | protein transport                                                                                                                                                                                                                  |
| N | B8CV40 | DE | UPF0341 protein swp_4895;                                                                                                                                                                                                          |
| N | B8CWY9 | CC | GTPase that plays an essential role in the late steps of ribosome biogenesis (By similarity).                                                                                                                                      |
| N | B8CWY9 | DE | GTP-binding protein EngA;                                                                                                                                                                                                          |
| N | B8CWY9 | DR | ribosome biogenesis                                                                                                                                                                                                                |
| N | B8D6W1 | DE | Acetylglutamate kinase;                                                                                                                                                                                                            |
| N | B8D6W1 | DE | N-acetyl-L-glutamate 5-phosphotransferase;                                                                                                                                                                                         |
| N | B8D6W1 | DR | acetylglutamate kinase activity                                                                                                                                                                                                    |
| N | B8D6W1 | DR | arginine biosynthetic process                                                                                                                                                                                                      |
| N | B8D732 | DE | 50S ribosomal protein L35;                                                                                                                                                                                                         |
| N | B8D732 | DR | structural constituent of ribosome                                                                                                                                                                                                 |
| N | B8D845 | CC | Protein S19 forms a complex with S13 that binds strongly to the 16S ribosomal RNA (By similarity).                                                                                                                                 |
| N | B8D845 | DE | 30S ribosomal protein S19;                                                                                                                                                                                                         |
| N | B8D845 | DR | structural constituent of ribosome                                                                                                                                                                                                 |
| N | B8D8L5 | DE | 30S ribosomal protein S21;                                                                                                                                                                                                         |
| N | B8D8L5 | DR | structural constituent of ribosome                                                                                                                                                                                                 |
| N | B8D955 | DE | High frequency lysogenization protein hflD homolog;                                                                                                                                                                                |
| N | B8D9G5 | CC | Catalyzes the conversion of glucosamine-6-phosphate to glucosamine-1-phosphate (By similarity).                                                                                                                                    |
| N | B8D9G5 | DE | Phosphoglucosamine mutase;                                                                                                                                                                                                         |
| N | B8D9G5 | DR | carbohydrate metabolic process                                                                                                                                                                                                     |
| N | B8D9G5 | DR | magnesium ion binding                                                                                                                                                                                                              |
| N | B8D9G5 | DR | phosphoglucosamine mutase activity                                                                                                                                                                                                 |
| N | B8DDM6 | DE | Formate--tetrahydrofolate ligase;                                                                                                                                                                                                  |
| N | B8DDM6 | DE | Formyltetrahydrofolate synthetase;                                                                                                                                                                                                 |
| N | B8DDM6 | DR | folic acid-containing compound biosynthetic process                                                                                                                                                                                |
| N | B8DDM6 | DR | formate-tetrahydrofolate ligase activity                                                                                                                                                                                           |
| N | B8DDM6 | DR | one-carbon metabolic process                                                                                                                                                                                                       |
| N | B8DE15 | CC | Necessary for efficient RNA polymerase transcription elongation past template-encoded arresting sites                                                                                                                              |
| N | B8DE15 | CC | Cleavage of the nascent transcript by cleavage factors such as greA or greB allows the resumption of elongation from the new 3'terminus                                                                                            |
| N | B8DE15 | CC | GreA releases sequences of 2 to 3 nucleotides (By similarity). The arresting sites in DNA have the property of trapping a certain fraction of elongating RNA polymerases that pass through, resulting in locked ternary complexes. |
| N | B8DE15 | DE | Transcript cleavage factor greA;                                                                                                                                                                                                   |
| N | B8DE15 | DE | Transcription elongation factor greA;                                                                                                                                                                                              |
| N | B8DE15 | DR | transcription elongation regulator activity                                                                                                                                                                                        |
| N | B8DM91 | CC | Catalyzes the condensation of the acetyl group of acetyl-CoA with 3-methyl-2-oxobutanoate (2-oxoisovalerate) to form 3-carboxy-3-hydroxy-4-methylpentanoate (2-isopropylmalate) (By similarity).                                   |
| N | B8DM91 | DE | 2-isopropylmalate synthase;                                                                                                                                                                                                        |
| N | B8DM91 | DE | Alpha-IPM synthase;                                                                                                                                                                                                                |
| N | B8DM91 | DE | Alpha-isopropylmalate synthase;                                                                                                                                                                                                    |
| N | B8DM91 | DR | 2-isopropylmalate synthase activity                                                                                                                                                                                                |
| N | B8DM91 | DR | leucine biosynthetic process                                                                                                                                                                                                       |
| N | B8DNA4 | DE | 50S ribosomal protein L29;                                                                                                                                                                                                         |
| N | B8DNA4 | DR | structural constituent of ribosome                                                                                                                                                                                                 |

|   |        |    |                                                                                                                                                                                                                                                                                                                                           |
|---|--------|----|-------------------------------------------------------------------------------------------------------------------------------------------------------------------------------------------------------------------------------------------------------------------------------------------------------------------------------------------|
| N | B8DNQ9 | DE | Acetohydroxy-acid isomeroreductase;                                                                                                                                                                                                                                                                                                       |
| N | B8DNQ9 | DE | Alpha-keto-beta-hydroxylacil reductoisomerase;                                                                                                                                                                                                                                                                                            |
| N | B8DNQ9 | DE | Ketol-acid reductoisomerase;                                                                                                                                                                                                                                                                                                              |
| N | B8DNQ9 | DR | branched chain family amino acid biosynthetic process                                                                                                                                                                                                                                                                                     |
| N | B8DNQ9 | DR | coenzyme binding                                                                                                                                                                                                                                                                                                                          |
| N | B8DNQ9 | DR | ketol-acid reductoisomerase activity                                                                                                                                                                                                                                                                                                      |
| N | B8DNQ9 | DR | oxidation-reduction process                                                                                                                                                                                                                                                                                                               |
| N | B8DTZ2 | CC | Prevents misfolding and promotes the refolding and proper assembly of unfolded polypeptides generated under stress conditions (By similarity).                                                                                                                                                                                            |
| N | B8DTZ2 | DE | 60 kDa chaperonin;                                                                                                                                                                                                                                                                                                                        |
| N | B8DTZ2 | DE | GroEL protein;                                                                                                                                                                                                                                                                                                                            |
| N | B8DTZ2 | DE | Protein Cpn60;                                                                                                                                                                                                                                                                                                                            |
| N | B8DTZ2 | DR | protein refolding                                                                                                                                                                                                                                                                                                                         |
| N | B8DUE9 | CC | Nuclease that resolves Holliday junction intermediates in genetic recombination cleaves the cruciform structure in supercoiled DNA by nicking to strands with the same polarity at sites symmetrically opposed at the junction in the homologous arms and leaves a 5'-terminal phosphate and a 3'-terminal hydroxyl group (By similarity) |
| N | B8DUE9 | CC | Crossover junction endodeoxyribonuclease ruvC;                                                                                                                                                                                                                                                                                            |
| N | B8DUE9 | DE | Holliday junction nuclease ruvC;                                                                                                                                                                                                                                                                                                          |
| N | B8DUE9 | DE | Holliday junction resolvase ruvC;                                                                                                                                                                                                                                                                                                         |
| N | B8DUE9 | DR | DNA recombination                                                                                                                                                                                                                                                                                                                         |
| N | B8DUE9 | DR | crossover junction endodeoxyribonuclease activity                                                                                                                                                                                                                                                                                         |
| N | B8DUE9 | DR | metal ion binding                                                                                                                                                                                                                                                                                                                         |
| N | B8DUE9 | DR | nucleic acid binding                                                                                                                                                                                                                                                                                                                      |
| N | B8DUE9 | DR | Binds 16S rRNA, required for the assembly of 50S particles and may also be responsible for determining the conformation of the 16S rRNA at the A site (By similarity)                                                                                                                                                                     |
| N | B8DW26 | CC | 30S ribosomal protein S14 type Z;                                                                                                                                                                                                                                                                                                         |
| N | B8DW26 | DE | metal ion binding                                                                                                                                                                                                                                                                                                                         |
| N | B8DW26 | DR | structural constituent of ribosome                                                                                                                                                                                                                                                                                                        |
| N | B8E975 | DE | Protein proQ homolog;                                                                                                                                                                                                                                                                                                                     |
| N | B8EEA7 | DE | 5-enolpyruvylshikimate-3-phosphate phospholyase;                                                                                                                                                                                                                                                                                          |
| N | B8EEA7 | DE | Chorismate synthase;                                                                                                                                                                                                                                                                                                                      |
| N | B8EEA7 | DR | aromatic amino acid family biosynthetic process                                                                                                                                                                                                                                                                                           |
| N | B8EEA7 | DR | chorismate synthase activity                                                                                                                                                                                                                                                                                                              |
| N | B8EPH9 | CC | The glycine cleavage system catalyzes the degradation of glycine                                                                                                                                                                                                                                                                          |
| N | B8EPH9 | CC | The P protein binds the alpha-amino group of glycine through its pyridoxal phosphate cofactor; CO(2) is released and the remaining methylamine moiety is then transferred to the lipoamide cofactor of the H protein (By similarity).                                                                                                     |
| N | B8EPH9 | DE | Glycine cleavage system P-protein subunit 1;                                                                                                                                                                                                                                                                                              |
| N | B8EPH9 | DE | Glycine decarboxylase subunit 1;                                                                                                                                                                                                                                                                                                          |
| N | B8EPH9 | DE | Probable glycine dehydrogenase [decarboxylating] subunit 1;                                                                                                                                                                                                                                                                               |
| N | B8EPH9 | DR | glycine dehydrogenase (decarboxylating) activity                                                                                                                                                                                                                                                                                          |
| N | B8EPH9 | DR | oxidation-reduction process                                                                                                                                                                                                                                                                                                               |
| N | B8EPH9 | DR | pyridoxal phosphate binding                                                                                                                                                                                                                                                                                                               |
| N | B8EQN3 | DE | 50S ribosomal protein L28;                                                                                                                                                                                                                                                                                                                |
| N | B8EQN3 | DR | structural constituent of ribosome                                                                                                                                                                                                                                                                                                        |
| N | B8ESL2 | DE | Argininosuccinate synthase;                                                                                                                                                                                                                                                                                                               |
| N | B8ESL2 | DE | Citrulline--aspartate ligase;                                                                                                                                                                                                                                                                                                             |
| N | B8ESL2 | DR | arginine biosynthetic process                                                                                                                                                                                                                                                                                                             |
| N | B8ESL2 | DR | argininosuccinate synthase activity                                                                                                                                                                                                                                                                                                       |
| N | B8F854 | CC | This enzyme is involved in nucleotide metabolism: it produces dUMP, the immediate precursor of thymidine nucleotides and it decreases the intracellular concentration of dUTP so that uracil cannot be incorporated into DNA (By similarity)                                                                                              |
| N | B8F854 | DE | Deoxyuridine 5'-triphosphate nucleotidohydrolase;                                                                                                                                                                                                                                                                                         |
| N | B8F854 | DE | dUTP pyrophosphatase;                                                                                                                                                                                                                                                                                                                     |
| N | B8F854 | DR | dUTP diphosphatase activity                                                                                                                                                                                                                                                                                                               |
| N | B8F854 | DR | dUTP metabolic process                                                                                                                                                                                                                                                                                                                    |
| N | B8F854 | DR | metal ion binding                                                                                                                                                                                                                                                                                                                         |
| N | B8FGA3 | CC | Involved in the modulation of the specificity of the ClpAP-mediated ATP-dependent protein degradation (By similarity).                                                                                                                                                                                                                    |
| N | B8FGA3 | DE | ATP-dependent Clp protease adapter protein ClpS;                                                                                                                                                                                                                                                                                          |
| N | B8FGA3 | DR | protein catabolic process                                                                                                                                                                                                                                                                                                                 |
| N | B8G806 | CC | Catalyzes the synthesis of alpha-ribazole-5-phosphate from nicotinate mononucleotide (NAMN) and 5,6- dimethylbenzimidazole (DMB) (By similarity)                                                                                                                                                                                          |
| N | B8G806 | DE | N(1)-alpha-phosphoribosyltransferase;                                                                                                                                                                                                                                                                                                     |

|   |        |    |                                                                                                                             |
|---|--------|----|-----------------------------------------------------------------------------------------------------------------------------|
| N | B8G806 | DE | NN:DBI PRT;                                                                                                                 |
| N | B8G806 | DE | Nicotinate-nucleotide--dimethylbenzimidazole phosphoribosyltransferase;                                                     |
| N | B8G806 | DR | cobalamin biosynthetic process                                                                                              |
| N | B8G806 | DR | nicotinate-nucleotide-dimethylbenzimidazole phosphoribosyltransferase activity                                              |
| N | B8G806 | DR | nucleoside biosynthetic process                                                                                             |
| N | B8GJ30 | DE | Anthranilate phosphoribosyltransferase;                                                                                     |
| N | B8GJ30 | DR | anthranilate phosphoribosyltransferase activity                                                                             |
| N | B8GJ30 | DR | tryptophan biosynthetic process                                                                                             |
| N | B8GP02 | CC | One of the essential components for the initiation of protein synthesis                                                     |
| N | B8GP02 | CC | Also involved in the hydrolysis of GTP during the formation of the 70S ribosomal complex (By similarity).                   |
| N | B8GP02 | CC | Protects formylmethionyl-tRNA from spontaneous hydrolysis and promotes its binding to the 30S ribosomal subunits            |
| N | B8GP02 | DE | Translation initiation factor IF-2;                                                                                         |
| N | B8GP02 | DR | GTPase activity                                                                                                             |
| N | B8GP02 | DR | translation initiation factor activity                                                                                      |
| N | B8GSV2 | DE | Argininosuccinate lyase;                                                                                                    |
| N | B8GSV2 | DE | Argininosuccinase;                                                                                                          |
| N | B8GSV2 | DR | arginine biosynthetic process via ornithine                                                                                 |
| N | B8GSV2 | DR | argininosuccinate lyase activity                                                                                            |
| N | B8GX35 | DE | Protein CrcB homolog;                                                                                                       |
| N | B8HD44 | CC | Catalyzes the transfer of acetyl from acetyl-CoA to desacetylmycothiol (Cys-GlcN-Ins) to form mycothiol (By similarity).    |
| N | B8HD44 | DE | MSH acetyltransferase;                                                                                                      |
| N | B8HD44 | DE | Mycothiol acetyltransferase;                                                                                                |
| N | B8HD44 | DE | Mycothiol synthase;                                                                                                         |
| N | B8HD44 | DR | N-acetyltransferase activity                                                                                                |
| N | B8HEU5 | CC | Catalyzes the reversible conversion of 2- phosphoglycerate into phosphoenolpyruvate                                         |
| N | B8HEU5 | CC | It is essential for the degradation of carbohydrates via glycolysis (By similarity).                                        |
| N | B8HEU5 | DE | 2-phospho-D-glycerate hydro-lyase;                                                                                          |
| N | B8HEU5 | DE | 2-phosphoglycerate dehydratase;                                                                                             |
| N | B8HEU5 | DR | magnesium ion binding                                                                                                       |
| N | B8HEU5 | DR | phosphopyruvate hydratase activity                                                                                          |
| N | B8HU41 | CC | Catalyzes the phosphorylation of the position 2 hydroxy group of 4-diphosphocytidyl-2C-methyl-D-erythritol (By similarity). |
| N | B8HU41 | DE | 4-(cytidine-5'-diphospho)-2-C-methyl-D-erythritol kinase;                                                                   |
| N | B8HU41 | DE | 4-diphosphocytidyl-2-C-methyl-D-erythritol kinase;                                                                          |
| N | B8HU41 | DR | 4-(cytidine 5'-diphospho)-2-C-methyl-D-erythritol kinase activity                                                           |
| N | B8HU41 | DR | terpenoid biosynthetic process                                                                                              |
| N | B8HXX4 | DE | 30S ribosomal protein S2;                                                                                                   |
| N | B8HXX4 | DR | structural constituent of ribosome                                                                                          |
| N | B8HXS5 | CC | Involved in DNA repair and recF pathway recombination (By similarity).                                                      |
| N | B8HXS5 | DE | DNA repair protein recO;                                                                                                    |
| N | B8HXS5 | DE | Recombination protein O;                                                                                                    |
| N | B8HXS5 | DR | ARF GTPase activator activity                                                                                               |
| N | B8HXS5 | DR | DNA recombination                                                                                                           |
| N | B8HXS5 | DR | regulation of ARF GTPase activity                                                                                           |
| N | B8HXS5 | DR | zinc ion binding                                                                                                            |
| N | B8I004 | CC | Catalyzes the dephosphorylation of undecaprenyl diphosphate (UPP)                                                           |
| N | B8I004 | CC | Confers resistance to bacitracin (By similarity).                                                                           |
| N | B8I004 | DE | Bacitracin resistance protein;                                                                                              |
| N | B8I004 | DE | Undecaprenyl pyrophosphate phosphatase;                                                                                     |
| N | B8I004 | DE | Undecaprenyl-diphosphatase;                                                                                                 |
| N | B8I004 | DR | cellular cell wall organization                                                                                             |
| N | B8I004 | DR | dephosphorylation                                                                                                           |
| N | B8I004 | DR | peptidoglycan biosynthetic process                                                                                          |
| N | B8I004 | DR | regulation of cell shape                                                                                                    |
| N | B8I004 | DR | response to antibiotic                                                                                                      |
| N | B8I004 | DR | undecaprenyl-diphosphatase activity                                                                                         |
| N | B8I364 | CC | Involved in the hydrolysis of glutamine to glutamate and ammonia                                                            |
| N | B8I364 | CC | Channels an ammonia molecule to pdxS (By similarity).                                                                       |
| N | B8I364 | DE | Glutamine amidotransferase glutaminase subunit pdxT;                                                                        |
| N | B8I364 | DE | Glutamine amidotransferase subunit pdxT;                                                                                    |
| N | B8I364 | DR | glutamine metabolic process                                                                                                 |
| N | B8I364 | DR | transferase activity                                                                                                        |

|   |        |    |                                                                                                                                                                                                                  |
|---|--------|----|------------------------------------------------------------------------------------------------------------------------------------------------------------------------------------------------------------------|
| N | B8IEM4 | CC | Specifically methylates the pseudouridine at position 1915 (m3Psi1915) in 23S rRNA (By similarity).                                                                                                              |
| N | B8IEM4 | DE | 23S rRNA m3Psi1915 methyltransferase;                                                                                                                                                                            |
| N | B8IEM4 | DE | Ribosomal RNA large subunit methyltransferase H;                                                                                                                                                                 |
| N | B8IEM4 | DE | rRNA (pseudouridine-N3-)-methyltransferase rlmH;                                                                                                                                                                 |
| N | B8IEM4 | DR | methyltransferase activity                                                                                                                                                                                       |
| N | B8IEM4 | DR | rRNA processing                                                                                                                                                                                                  |
| N | B8IU50 | CC | Molecular chaperone                                                                                                                                                                                              |
| N | B8IU50 | CC | Has ATPase activity (By similarity).                                                                                                                                                                             |
| N | B8IU50 | DE | Chaperone protein htpG;                                                                                                                                                                                          |
| N | B8IU50 | DE | Heat shock protein htpG;                                                                                                                                                                                         |
| N | B8IU50 | DE | High temperature protein G;                                                                                                                                                                                      |
| N | B8IU50 | DR | protein folding                                                                                                                                                                                                  |
| N | B8IU50 | DR | response to stress                                                                                                                                                                                               |
| N | B8IU50 | DR | unfolded protein binding                                                                                                                                                                                         |
| N | B8IZD9 | CC | Catalyzes the NADPH-dependent reduction of glutamyl- tRNA(Glu) to glutamate 1-semialdehyde (GSA) (By similarity).                                                                                                |
| N | B8IZD9 | DE | Glutamyl-tRNA reductase;                                                                                                                                                                                         |
| N | B8IZD9 | DR | glutamyl-tRNA reductase activity                                                                                                                                                                                 |
| N | B8IZD9 | DR | oxidation-reduction process                                                                                                                                                                                      |
| N | B8IZD9 | DR | porphyrin biosynthetic process                                                                                                                                                                                   |
| N | B8IZD9 | DR | shikimate 5-dehydrogenase activity                                                                                                                                                                               |
| N | B8J0S2 | DE | Cysteine--tRNA ligase;                                                                                                                                                                                           |
| N | B8J0S2 | DE | Cysteinyl-tRNA synthetase;                                                                                                                                                                                       |
| N | B8J0S2 | DR | cysteine-tRNA ligase activity                                                                                                                                                                                    |
| N | B8J0S2 | DR | cysteinyl-tRNA aminoacylation                                                                                                                                                                                    |
| N | B8J0S2 | DR | metal ion binding                                                                                                                                                                                                |
| N | B8J1A0 | CC | This protein promotes the GTP-dependent binding of aminoacyl-tRNA to the A-site of ribosomes during protein biosynthesis (By similarity).                                                                        |
| N | B8J1A0 | DE | Elongation factor Tu;                                                                                                                                                                                            |
| N | B8J1A0 | DR | GTPase activity                                                                                                                                                                                                  |
| N | B8J1A0 | DR | translation elongation factor activity                                                                                                                                                                           |
| N | B8J436 | CC | F(1)F(0) ATP synthase produces ATP from ADP in the presence of a proton or sodium gradient                                                                                                                       |
| N | B8J436 | CC | During catalysis, ATP synthesis in the catalytic domain of F(1) is coupled via a rotary mechanism of the central stalk subunits to proton translocation (By similarity)                                          |
| N | B8J436 | CC | F-type ATPases consist of two structural domains, F(1) containing the extramembraneous catalytic core and F(0) containing the membrane proton channel, linked together by a central stalk and a peripheral stalk |
| N | B8J436 | DE | ATP synthase F(1) sector subunit delta;                                                                                                                                                                          |
| N | B8J436 | DE | ATP synthase subunit delta;                                                                                                                                                                                      |
| N | B8J436 | DE | F-ATPase subunit delta;                                                                                                                                                                                          |
| N | B8J436 | DE | F-type ATPase subunit delta;                                                                                                                                                                                     |
| N | B8J436 | DR | ATP synthesis coupled proton transport                                                                                                                                                                           |
| N | B8J436 | DR | hydrogen ion transporting ATP synthase activity, rotational mechanism                                                                                                                                            |
| N | B8J863 | CC | One of the primary rRNA binding proteins                                                                                                                                                                         |
| N | B8J863 | CC | It has been suggested to have peptidyltransferase activity; this is somewhat controversial                                                                                                                       |
| N | B8J863 | CC | Makes several contacts with the 16S rRNA in the 70S ribosome (By similarity).                                                                                                                                    |
| N | B8J863 | CC | Required for association of the 30S and 50S subunits to form the 70S ribosome, for tRNA binding and peptide bond formation                                                                                       |
| N | B8J863 | DE | 50S ribosomal protein L2;                                                                                                                                                                                        |
| N | B8J863 | DR | structural constituent of ribosome                                                                                                                                                                               |
| N | B8J863 | DR | transferase activity                                                                                                                                                                                             |
| N | B8J9L8 | CC | Catalyzes the decarboxylation of orotidine 5'- monophosphate (OMP) to uridine 5'-monophosphate (UMP) (By similarity).                                                                                            |
| N | B8J9L8 | DE | OMP decarboxylase;                                                                                                                                                                                               |
| N | B8J9L8 | DE | Orotidine 5'-phosphate decarboxylase;                                                                                                                                                                            |
| N | B8J9L8 | DR | 'de novo' UMP biosynthetic process                                                                                                                                                                               |
| N | B8J9L8 | DR | 'de novo' pyrimidine base biosynthetic process                                                                                                                                                                   |
| N | B8J9L8 | DR | orotidine-5'-phosphate decarboxylase activity                                                                                                                                                                    |
| N | B8JDE1 | CC | Involved in DNA repair and recF pathway recombination (By similarity).                                                                                                                                           |
| N | B8JDE1 | DE | DNA repair protein recO;                                                                                                                                                                                         |
| N | B8JDE1 | DE | Recombination protein O;                                                                                                                                                                                         |
| N | B8JDE1 | DR | ARF GTPase activator activity                                                                                                                                                                                    |
| N | B8JDE1 | DR | DNA recombination                                                                                                                                                                                                |



|   |        |    |                                                                                                                                                                                                                                              |
|---|--------|----|----------------------------------------------------------------------------------------------------------------------------------------------------------------------------------------------------------------------------------------------|
| N | B8JDE1 | DR | regulation of ARF GTPase activity                                                                                                                                                                                                            |
| N | B8JDE1 | DR | zinc ion binding                                                                                                                                                                                                                             |
| N | B8JFZ2 | CC | This enzyme is involved in nucleotide metabolism: it produces dUMP, the immediate precursor of thymidine nucleotides and it decreases the intracellular concentration of dUTP so that uracil cannot be incorporated into DNA (By similarity) |
| N | B8JFZ2 | DE | Deoxyuridine 5'-triphosphate nucleotidohydrolase;                                                                                                                                                                                            |
| N | B8JFZ2 | DE | dUTP pyrophosphatase;                                                                                                                                                                                                                        |
| N | B8JFZ2 | DR | dUTP diphosphatase activity                                                                                                                                                                                                                  |
| N | B8JFZ2 | DR | dUTP metabolic process                                                                                                                                                                                                                       |
| N | B8JFZ2 | DR | metal ion binding                                                                                                                                                                                                                            |
| N | B8PZP3 | CC | Encapsidates the genome in a ratio of 1 N per 6 ribonucleotides, protecting it from nucleases                                                                                                                                                |
| N | B8PZP3 | CC | During replication, encapsidation by N is coupled to RNA synthesis and all replicative products are resistant to nucleases                                                                                                                   |
| N | B8PZP3 | CC | N is released in the blood following lysis of measles infected cells, it interacts then with human FCGR2B on immune cells, inducing apoptosis and blocking inflammatory immune response                                                      |
| N | B8PZP3 | CC | Ntail binds to a protein on human thymic epithelial cells, termed Nucleoprotein Receptor (NR), inducing growth arrest (By similarity).                                                                                                       |
| N | B8PZP3 | CC | The encapsidated genomic RNA is termed the NC and serves as template for transcription and replication                                                                                                                                       |
| N | B8PZP3 | CC | The nucleocapsid (NC) has an helical structure with either 12.35 or 11.64 N per turn, approximately 20nm in diameter, with a hollow central cavity approximately 5nm in diameter                                                             |
| N | B8PZP3 | DE | Nucleocapsid protein;                                                                                                                                                                                                                        |
| N | B8PZP3 | DE | Nucleoprotein;                                                                                                                                                                                                                               |
| N | B8PZP3 | DR | interspecies interaction between organisms                                                                                                                                                                                                   |
| N | B8PZP3 | DR | structural molecule activity                                                                                                                                                                                                                 |
| N | B8ZK31 | CC | PRODUCES ATP FROM ADP in the presence of a proton gradient across the membrane                                                                                                                                                               |
| N | B8ZK31 | CC | The V-type alpha chain is a catalytic subunit (By similarity).                                                                                                                                                                               |
| N | B8ZK31 | DE | V-ATPase subunit A;                                                                                                                                                                                                                          |
| N | B8ZK31 | DE | V-type ATP synthase alpha chain;                                                                                                                                                                                                             |
| N | B8ZK31 | DR | ATP biosynthetic process                                                                                                                                                                                                                     |
| N | B8ZK31 | DR | ATP hydrolysis coupled proton transport                                                                                                                                                                                                      |
| N | B8ZK31 | DR | hydrogen ion transporting ATP synthase activity, rotational mechanism                                                                                                                                                                        |
| N | B8ZK31 | DR | proton-transporting ATPase activity, rotational mechanism                                                                                                                                                                                    |
| N | B8ZNP1 | DE | Pantothenate kinase;                                                                                                                                                                                                                         |
| N | B8ZNP1 | DE | Pantothenic acid kinase;                                                                                                                                                                                                                     |
| N | B8ZNP1 | DR | coenzyme A biosynthetic process                                                                                                                                                                                                              |
| N | B8ZNP1 | DR | pantothenate kinase activity                                                                                                                                                                                                                 |
| N | B8ZQ64 | DE | Phosphotagatokinase;                                                                                                                                                                                                                         |
| N | B8ZQ64 | DE | Tagatose-6-phosphate kinase;                                                                                                                                                                                                                 |
| N | B8ZQ64 | DR | lactose catabolic process via tagatose-6-phosphate                                                                                                                                                                                           |
| N | B8ZQ64 | DR | tagatose-6-phosphate kinase activity                                                                                                                                                                                                         |
| N | B8ZRK9 | DE | Argininosuccinate lyase;                                                                                                                                                                                                                     |
| N | B8ZRK9 | DE | Arginosuccinase;                                                                                                                                                                                                                             |
| N | B8ZRK9 | DR | arginine biosynthetic process via ornithine                                                                                                                                                                                                  |
| N | B8ZRK9 | DR | argininosuccinate lyase activity                                                                                                                                                                                                             |
| N | B8ZUC1 | CC | Catalyzes the conversion of glucosamine-6-phosphate to glucosamine-1-phosphate (By similarity).                                                                                                                                              |
| N | B8ZUC1 | DE | Phosphoglucosamine mutase;                                                                                                                                                                                                                   |
| N | B8ZUC1 | DR | carbohydrate metabolic process                                                                                                                                                                                                               |
| N | B8ZUC1 | DR | magnesium ion binding                                                                                                                                                                                                                        |
| N | B8ZUC1 | DR | phosphoglucosamine mutase activity                                                                                                                                                                                                           |
| N | B8ZUG3 | CC | Involved in the production of pyridoxal phosphate, probably by incorporating ammonia into the pyridine ring (By similarity).                                                                                                                 |
| N | B8ZUG3 | DE | Pyridoxal biosynthesis lyase pdxS;                                                                                                                                                                                                           |
| N | B8ZUG3 | DR | lyase activity                                                                                                                                                                                                                               |
| N | B8ZUG3 | DR | pyridoxal phosphate biosynthetic process                                                                                                                                                                                                     |
| N | B8ZUM0 | CC | Promotes RNA polymerase assembly                                                                                                                                                                                                             |
| N | B8ZUM0 | CC | Latches the N- and C- terminal regions of the beta' subunit thereby facilitating its interaction with the beta and alpha subunits (By similarity).                                                                                           |
| N | B8ZUM0 | DE | DNA-directed RNA polymerase subunit omega;                                                                                                                                                                                                   |
| N | B8ZUM0 | DE | RNA polymerase omega subunit;                                                                                                                                                                                                                |
| N | B8ZUM0 | DE | RNAP omega subunit;                                                                                                                                                                                                                          |

|   |        |    |                                                                                                                                                                                                                                                                                     |
|---|--------|----|-------------------------------------------------------------------------------------------------------------------------------------------------------------------------------------------------------------------------------------------------------------------------------------|
| N | B8ZUM0 | DE | Transcriptase subunit omega;                                                                                                                                                                                                                                                        |
| N | B8ZUM0 | DR | DNA-directed RNA polymerase activity                                                                                                                                                                                                                                                |
| N | B9A8D7 | CC | Slow-binding inhibitor of serine proteases                                                                                                                                                                                                                                          |
| N | B9A8D7 | CC | Active against perikinsin                                                                                                                                                                                                                                                           |
| N | B9A8D7 | CC | Active against subtilisin A with a dissociation constant of 0.18 nM                                                                                                                                                                                                                 |
| N | B9A8D7 | CC | Not active against thermolysin, papain or pepsin.<br>The inhibitor rapidly binds to the protease forming a weak enzyme-inhibitor complex, and this is followed by a slow isomerization forming a tight-binding enzyme-inhibitor complex.                                            |
| N | B9A8D7 | DE | Serine protease inhibitor Cvs1-2;                                                                                                                                                                                                                                                   |
| N | B9A8D7 | DR | serine-type endopeptidase inhibitor activity                                                                                                                                                                                                                                        |
| N | B9DIP1 | CC | IGPS catalyzes the conversion of PRFAR and glutamine to IGP, AICAR and glutamate.                                                                                                                                                                                                   |
| N | B9DIP1 | CC | The hisF subunit catalyzes the cyclization activity that produces IGP and AICAR from PRFAR using the ammonia provided by the hisH subunit (By similarity).                                                                                                                          |
| N | B9DIP1 | DE | IGP synthase cyclase subunit;                                                                                                                                                                                                                                                       |
| N | B9DIP1 | DE | IGP synthase subunit hisF;                                                                                                                                                                                                                                                          |
| N | B9DIP1 | DE | IGPS subunit hisF;                                                                                                                                                                                                                                                                  |
| N | B9DIP1 | DE | ImGP synthase subunit hisF;                                                                                                                                                                                                                                                         |
| N | B9DIP1 | DE | Imidazole glycerol phosphate synthase subunit hisF;                                                                                                                                                                                                                                 |
| N | B9DIP1 | DR | histidine biosynthetic process                                                                                                                                                                                                                                                      |
| N | B9DIP1 | DR | imidazoleglycerol-phosphate synthase activity                                                                                                                                                                                                                                       |
| N | B9DIP1 | DR | lyase activity                                                                                                                                                                                                                                                                      |
| N | B9DMK9 | CC | Modulates transcription in response to changes in cellular NADH/NAD(+) redox state (By similarity).                                                                                                                                                                                 |
| N | B9DMK9 | DE | Redox-sensing transcriptional repressor rex;                                                                                                                                                                                                                                        |
| N | B9DMK9 | DR | catalytic activity                                                                                                                                                                                                                                                                  |
| N | B9DMK9 | DR | response to redox state                                                                                                                                                                                                                                                             |
| N | B9DMK9 | DR | transcription repressor activity                                                                                                                                                                                                                                                    |
| N | B9DNC5 | DE | 50S ribosomal protein L35;                                                                                                                                                                                                                                                          |
| N | B9DNC5 | DR | structural constituent of ribosome                                                                                                                                                                                                                                                  |
| N | B9DVD9 | CC | Component of the acetyl coenzyme A carboxylase (ACC) complex<br>First, biotin carboxylase catalyzes the carboxylation of biotin on its carrier protein (BCCP) and then the CO(2) group is transferred by the carboxyltransferase to acetyl-CoA to form malonyl-CoA (By similarity). |
| N | B9DVD9 | DE | ACCCase subunit alpha;                                                                                                                                                                                                                                                              |
| N | B9DVD9 | DE | Acetyl-CoA carboxylase carboxyltransferase subunit alpha;                                                                                                                                                                                                                           |
| N | B9DVD9 | DE | Acetyl-coenzyme A carboxylase carboxyl transferase subunit alpha;                                                                                                                                                                                                                   |
| N | B9DVD9 | DR | acetyl-CoA carboxylase activity                                                                                                                                                                                                                                                     |
| N | B9DVD9 | DR | fatty acid biosynthetic process                                                                                                                                                                                                                                                     |
| N | B9DVU8 | CC | Converts N-acetylmannosamine-6-phosphate (ManNAc-6-P) to N-acetylglucosamine-6-phosphate (GlcNAc-6-P) (Potential).                                                                                                                                                                  |
| N | B9DVU8 | DE | ManNAc-6-P epimerase;                                                                                                                                                                                                                                                               |
| N | B9DVU8 | DE | Putative N-acetylmannosamine-6-phosphate 2-epimerase;                                                                                                                                                                                                                               |
| N | B9DVU8 | DR | N-acetylmannosamine metabolic process                                                                                                                                                                                                                                               |
| N | B9DVU8 | DR | N-acylglucosamine-6-phosphate 2-epimerase activity                                                                                                                                                                                                                                  |
| N | B9DW63 | DE | UPF0297 protein SUB1776;<br>Catalyzes the acyloin condensation reaction between C atoms 2 and 3 of pyruvate and glyceraldehyde 3-phosphate to yield 1-deoxy-D-xylulose-5-phosphate (DXP) (By similarity).                                                                           |
| N | B9E104 | CC |                                                                                                                                                                                                                                                                                     |
| N | B9E104 | DE | 1-deoxy-D-xylulose-5-phosphate synthase;                                                                                                                                                                                                                                            |
| N | B9E104 | DE | 1-deoxyxylulose-5-phosphate synthase;                                                                                                                                                                                                                                               |
| N | B9E104 | DE | DXP synthase;                                                                                                                                                                                                                                                                       |
| N | B9E104 | DR | 1-deoxy-D-xylulose-5-phosphate synthase activity                                                                                                                                                                                                                                    |
| N | B9E104 | DR | terpenoid biosynthetic process                                                                                                                                                                                                                                                      |
| N | B9E104 | DR | thiamine biosynthetic process                                                                                                                                                                                                                                                       |
| N | B9E104 | DR | thiamine pyrophosphate binding                                                                                                                                                                                                                                                      |
| N | B9E7A6 | CC | Component of the acetyl coenzyme A carboxylase (ACC) complex<br>Biotin carboxylase (BC) catalyzes the carboxylation of biotin on its carrier protein (BCCP) and then the CO(2) group is transferred by the transcarboxylase to acetyl-CoA to form malonyl-CoA (By similarity).      |
| N | B9E7A6 | CC |                                                                                                                                                                                                                                                                                     |
| N | B9E7A6 | DE | ACCCase subunit beta;                                                                                                                                                                                                                                                               |
| N | B9E7A6 | DE | Acetyl-CoA carboxylase carboxyltransferase subunit beta;                                                                                                                                                                                                                            |
| N | B9E7A6 | DE | Acetyl-coenzyme A carboxylase carboxyl transferase subunit beta;                                                                                                                                                                                                                    |
| N | B9E7A6 | DR | acetyl-CoA carboxylase activity                                                                                                                                                                                                                                                     |
| N | B9E7A6 | DR | fatty acid biosynthetic process                                                                                                                                                                                                                                                     |
| N | B9E7A6 | DR | metal ion binding                                                                                                                                                                                                                                                                   |

|   |        |    |                                                                                                                                                                                                                                                                                                                                                                                                                                                                                                                                     |
|---|--------|----|-------------------------------------------------------------------------------------------------------------------------------------------------------------------------------------------------------------------------------------------------------------------------------------------------------------------------------------------------------------------------------------------------------------------------------------------------------------------------------------------------------------------------------------|
| N | B9E8G2 | DE | Thymidine kinase;                                                                                                                                                                                                                                                                                                                                                                                                                                                                                                                   |
| N | B9E8G2 | DR | DNA replication                                                                                                                                                                                                                                                                                                                                                                                                                                                                                                                     |
| N | B9E8G2 | DR | metal ion binding                                                                                                                                                                                                                                                                                                                                                                                                                                                                                                                   |
| N | B9E8G2 | DR | thymidine kinase activity                                                                                                                                                                                                                                                                                                                                                                                                                                                                                                           |
| N | B9EBI5 | CC | This protein is involved in the repair of mismatches in DNA                                                                                                                                                                                                                                                                                                                                                                                                                                                                         |
| N | B9EBI5 | CC | It is required for dam-dependent methyl-directed DNA mismatch repair<br>May act as a "molecular matchmaker", a protein that promotes the formation of a stable complex between two or more DNA-binding proteins in an ATP-dependent manner without itself being part of a final effector complex (By similarity)                                                                                                                                                                                                                    |
| N | B9EBI5 | CC |                                                                                                                                                                                                                                                                                                                                                                                                                                                                                                                                     |
| N | B9EBI5 | DE | DNA mismatch repair protein mutL;                                                                                                                                                                                                                                                                                                                                                                                                                                                                                                   |
| N | B9EBI5 | DR | mismatch repair                                                                                                                                                                                                                                                                                                                                                                                                                                                                                                                     |
| N | B9EBI5 | DR | mismatched DNA binding                                                                                                                                                                                                                                                                                                                                                                                                                                                                                                              |
| N | B9ENE7 | CC | Component of a splicing-dependent multiprotein exon junction complex (EJC) deposited at splice junction on mRNAs<br>Core components of the EJC, that remains bound to spliced mRNAs throughout all stages of mRNA metabolism, functions to mark the position of the exon-exon junction in the mature mRNA and thereby influences downstream processes of gene expression including mRNA splicing, nuclear mRNA export, subcellular mRNA localization, translation efficiency and nonsense-mediated mRNA decay (NMD) (By similarity) |
| N | B9ENE7 | CC | The EJC is a dynamic structure consisting of a few core proteins and several more peripheral nuclear and cytoplasmic associated factors that join the complex only transiently either during EJC assembly or during subsequent mRNA metabolism                                                                                                                                                                                                                                                                                      |
| N | B9ENE7 | DE | Protein mago nashi homolog;                                                                                                                                                                                                                                                                                                                                                                                                                                                                                                         |
| N | B9ENE7 | DR | mRNA processing                                                                                                                                                                                                                                                                                                                                                                                                                                                                                                                     |
| N | B9ENE7 | DR | mRNA transport                                                                                                                                                                                                                                                                                                                                                                                                                                                                                                                      |
| N | B9ENE7 | DR | nuclear-transcribed mRNA catabolic process, nonsense-mediated decay                                                                                                                                                                                                                                                                                                                                                                                                                                                                 |
| N | B9ENE7 | DR | regulation of translation                                                                                                                                                                                                                                                                                                                                                                                                                                                                                                           |
| N | B9ENM6 | CC | Ubiquitin-like modifier protein which binds to a number of as yet unidentified target proteins (By similarity).                                                                                                                                                                                                                                                                                                                                                                                                                     |
| N | B9ENM6 | DE | Ubiquitin-fold modifier 1;                                                                                                                                                                                                                                                                                                                                                                                                                                                                                                          |
| N | B9ENM6 | DR | protein ufmylation                                                                                                                                                                                                                                                                                                                                                                                                                                                                                                                  |
| N | B9IUK2 | DE | UPF0154 protein BCQ_3484;                                                                                                                                                                                                                                                                                                                                                                                                                                                                                                           |
| N | B9IUK2 | DR | calcium ion binding                                                                                                                                                                                                                                                                                                                                                                                                                                                                                                                 |
| N | B9IWT7 | CC | Binds to sigma F and blocks its ability to form an RNA polymerase holoenzyme (E-sigma F)                                                                                                                                                                                                                                                                                                                                                                                                                                            |
| N | B9IWT7 | CC | Phosphorylates SpoIIAA on a serine residue                                                                                                                                                                                                                                                                                                                                                                                                                                                                                          |
| N | B9IWT7 | CC | This phosphorylation may enable SpoIIAA to act as an anti-anti-sigma factor that counteracts SpoIIAB and thus releases sigma F from inhibition (By similarity).                                                                                                                                                                                                                                                                                                                                                                     |
| N | B9IWT7 | DE | Anti-sigma F factor;                                                                                                                                                                                                                                                                                                                                                                                                                                                                                                                |
| N | B9IWT7 | DE | Stage II sporulation protein AB;                                                                                                                                                                                                                                                                                                                                                                                                                                                                                                    |
| N | B9IWT7 | DR | negative regulation of transcription, DNA-dependent                                                                                                                                                                                                                                                                                                                                                                                                                                                                                 |
| N | B9IWT7 | DR | protein phosphorylation                                                                                                                                                                                                                                                                                                                                                                                                                                                                                                             |
| N | B9IWT7 | DR | protein serine/threonine kinase activity                                                                                                                                                                                                                                                                                                                                                                                                                                                                                            |
| N | B9IWT7 | DR | sigma factor antagonist activity                                                                                                                                                                                                                                                                                                                                                                                                                                                                                                    |
| N | B9IWT7 | DR | sporulation resulting in formation of a cellular spore                                                                                                                                                                                                                                                                                                                                                                                                                                                                              |
| N | B9IZV2 | DE | UPF0346 protein BCQ_2236;                                                                                                                                                                                                                                                                                                                                                                                                                                                                                                           |
| N | B9J159 | CC | One of the primary rRNA binding proteins, it binds directly to 16S rRNA where it nucleates assembly of the body of the 30S subunit (By similarity).                                                                                                                                                                                                                                                                                                                                                                                 |
| N | B9J159 | DE | 30S ribosomal protein S4;                                                                                                                                                                                                                                                                                                                                                                                                                                                                                                           |
| N | B9J159 | DR | structural constituent of ribosome                                                                                                                                                                                                                                                                                                                                                                                                                                                                                                  |
| N | B9J7U0 | CC | Negative regulator of class I heat shock genes (gipe- uiaA-uiaB and groEL- groES operons)                                                                                                                                                                                                                                                                                                                                                                                                                                           |
| N | B9J7U0 | CC | Prevents heat-shock induction of these operons (By similarity).                                                                                                                                                                                                                                                                                                                                                                                                                                                                     |
| N | B9J7U0 | DE | Heat-inducible transcription repressor hrcA;                                                                                                                                                                                                                                                                                                                                                                                                                                                                                        |
| N | B9J7U0 | DR | regulation of transcription, DNA-dependent                                                                                                                                                                                                                                                                                                                                                                                                                                                                                          |
| N | B9J7U0 | DR | response to stress                                                                                                                                                                                                                                                                                                                                                                                                                                                                                                                  |
| N | B9JUH8 | CC | Catalyzes the transfer of a phosphate group to glutamate to form glutamate 5-phosphate which rapidly cyclizes to 5- oxoproline (By similarity).                                                                                                                                                                                                                                                                                                                                                                                     |
| N | B9JUH8 | DE | Gamma-glutamyl kinase;                                                                                                                                                                                                                                                                                                                                                                                                                                                                                                              |
| N | B9JUH8 | DE | Glutamate 5-kinase;                                                                                                                                                                                                                                                                                                                                                                                                                                                                                                                 |
| N | B9JUH8 | DR | glutamate 5-kinase activity                                                                                                                                                                                                                                                                                                                                                                                                                                                                                                         |
| N | B9JUH8 | DR | proline biosynthetic process                                                                                                                                                                                                                                                                                                                                                                                                                                                                                                        |
| N | B9JWX0 | CC | Transfers and isomerizes the ribose moiety from AdoMet to the 7-aminomethyl group of 7-deazaguanine (preQ1-tRNA) to give epoxyqueuosine (oQ-tRNA) (By similarity)                                                                                                                                                                                                                                                                                                                                                                   |
| N | B9JWX0 | DE | Queuosine biosynthesis protein queA;                                                                                                                                                                                                                                                                                                                                                                                                                                                                                                |
| N | B9JWX0 | DE | S-adenosylmethionine:tRNA ribosyltransferase-isomerase;                                                                                                                                                                                                                                                                                                                                                                                                                                                                             |

|   |        |    |                                                                                                                                                                                                                                                                       |
|---|--------|----|-----------------------------------------------------------------------------------------------------------------------------------------------------------------------------------------------------------------------------------------------------------------------|
| N | B9JWX0 | DR | isomerase activity                                                                                                                                                                                                                                                    |
| N | B9JWX0 | DR | queuosine biosynthetic process                                                                                                                                                                                                                                        |
| N | B9JWX0 | DR | transferase activity                                                                                                                                                                                                                                                  |
| N | B9KBC2 | CC | modifies the free amino group of the aminoacyl moiety of methionyl-tRNA (Met-tRNA)                                                                                                                                                                                    |
| N | B9KBC2 | CC | The formyl group appears to play a dual role in the initiator identity of N-formylmethionyl-tRNA by: (I) promoting its recognition by IF2 and (II) impairing its binding to EFTu-GTP (By similarity).                                                                 |
| N | B9KBC2 | DE | Methionyl-tRNA formyltransferase;                                                                                                                                                                                                                                     |
| N | B9KBC2 | DR | methionyl-tRNA formyltransferase activity                                                                                                                                                                                                                             |
| N | B9KBC2 | DR | methyltransferase activity                                                                                                                                                                                                                                            |
| N | B9KJ69 | CC | One of the primary rRNA binding proteins, this protein initially binds near the 5'-end of the 23S rRNA                                                                                                                                                                |
| N | B9KJ69 | CC | It is important during the early stages of 50S assembly                                                                                                                                                                                                               |
| N | B9KJ69 | CC | It makes multiple contacts with different domains of the 23S rRNA in the assembled 50S subunit and ribosome (By similarity).                                                                                                                                          |
| N | B9KJ69 | DE | 50S ribosomal protein L4;                                                                                                                                                                                                                                             |
| N | B9KJ69 | DR | structural constituent of ribosome                                                                                                                                                                                                                                    |
| N | B9KKV1 | CC | Phosphorylation of dTMP to form dTDP in both de novo and salvage pathways of dTTP synthesis (By similarity).                                                                                                                                                          |
| N | B9KKV1 | DE | Thymidylate kinase;                                                                                                                                                                                                                                                   |
| N | B9KKV1 | DE | dTMP kinase;                                                                                                                                                                                                                                                          |
| N | B9KKV1 | DR | dTDP biosynthetic process                                                                                                                                                                                                                                             |
| N | B9KKV1 | DR | thymidylate kinase activity                                                                                                                                                                                                                                           |
| N | B9KSB0 | CC | Involved in DNA repair and recF pathway recombination (By similarity).                                                                                                                                                                                                |
| N | B9KSB0 | DE | DNA repair protein recO;                                                                                                                                                                                                                                              |
| N | B9KSB0 | DE | Recombination protein O;                                                                                                                                                                                                                                              |
| N | B9KSB0 | DR | ARF GTPase activator activity                                                                                                                                                                                                                                         |
| N | B9KSB0 | DR | DNA recombination                                                                                                                                                                                                                                                     |
| N | B9KSB0 | DR | regulation of ARF GTPase activity                                                                                                                                                                                                                                     |
| N | B9KSB0 | DR | zinc ion binding                                                                                                                                                                                                                                                      |
| N | B9KW01 | CC | This protein binds to 23S rRNA in the presence of protein L20 (By similarity).                                                                                                                                                                                        |
| N | B9KW01 | DE | 50S ribosomal protein L21;                                                                                                                                                                                                                                            |
| N | B9KW01 | DR | structural constituent of ribosome                                                                                                                                                                                                                                    |
| N | B9LCT8 | CC | The ruvA-ruvB complex in the presence of ATP renatures cruciform structure in supercoiled DNA with palindromic sequence, indicating that it may promote strand exchange reactions in homologous recombination                                                         |
| N | B9LCT8 | CC | RuvA stimulates, in the presence of DNA, the weak ATPase activity of ruvB (By similarity).                                                                                                                                                                            |
| N | B9LCT8 | CC | RuvAB is an helicase that mediates the Holliday junction migration by localized denaturation and reannealing                                                                                                                                                          |
| N | B9LCT8 | DE | Holliday junction ATP-dependent DNA helicase ruvA;                                                                                                                                                                                                                    |
| N | B9LCT8 | DR | DNA recombination                                                                                                                                                                                                                                                     |
| N | B9LCT8 | DR | four-way junction helicase activity                                                                                                                                                                                                                                   |
| N | B9LHE7 | CC | Guanylyltransferase that catalyzes the activation of L- phospho-L-lactate (LP) as (2S)-lactyl-2-diphospho-5'-guanosine (LPPG), via the condensation of LP with CTP                                                                                                    |
| N | B9LHE7 | CC | Is involved in the biosynthesis of coenzyme F420, a hydride carrier cofactor (By similarity).                                                                                                                                                                         |
| N | B9LHE7 | DE | 2-phospho-L-lactate guanylyltransferase;                                                                                                                                                                                                                              |
| N | B9LHE7 | DE | LP guanylyltransferase;                                                                                                                                                                                                                                               |
| N | B9LHE7 | DR | nucleotidyltransferase activity                                                                                                                                                                                                                                       |
| N | B9LI79 | CC | Specifically methylates guanosine-37 in various tRNAs (By similarity).                                                                                                                                                                                                |
| N | B9LI79 | DE | M1G-methyltransferase;                                                                                                                                                                                                                                                |
| N | B9LI79 | DE | tRNA (guanine-N(1)-)-methyltransferase;                                                                                                                                                                                                                               |
| N | B9LI79 | DE | tRNA [GM37] methyltransferase;                                                                                                                                                                                                                                        |
| N | B9LI79 | DR | tRNA (guanine-N1-)-methyltransferase activity                                                                                                                                                                                                                         |
| N | B9LK05 | DE | Protein CrcB homolog;                                                                                                                                                                                                                                                 |
| N | B9LQ97 | DE | N-(5'-phosphoribosyl)anthranilate isomerase;                                                                                                                                                                                                                          |
| N | B9LQ97 | DR | phosphoribosylanthranilate isomerase activity                                                                                                                                                                                                                         |
| N | B9LQ97 | DR | tryptophan biosynthetic process                                                                                                                                                                                                                                       |
| N | B9LR22 | CC | Catalyzes the radical-mediated insertion of two sulfur atoms into the C-6 and C-8 positions of the octanoyl moiety bound to the lipoyl domains of lipoate-dependent enzymes, thereby converting the octanoylated domains into lipoylated derivatives (By similarity). |
| N | B9LR22 | DE | Lipoate synthase;                                                                                                                                                                                                                                                     |
| N | B9LR22 | DE | Lipoic acid synthase;                                                                                                                                                                                                                                                 |

|   |        |    |                                                                                                                                                                                                 |
|---|--------|----|-------------------------------------------------------------------------------------------------------------------------------------------------------------------------------------------------|
| N | B9LR22 | DE | Probable lipoyl synthase;                                                                                                                                                                       |
| N | B9LR22 | DE | Sulfur insertion protein lipA;                                                                                                                                                                  |
| N | B9LR22 | DR | 4 iron, 4 sulfur cluster binding                                                                                                                                                                |
| N | B9LR22 | DR | lipoate biosynthetic process                                                                                                                                                                    |
| N | B9LR22 | DR | lipoate synthase activity                                                                                                                                                                       |
| N | B9LR22 | DR | metal ion binding                                                                                                                                                                               |
| N | B9LUM9 | CC | The UvrABC repair system catalyzes the recognition and processing of DNA lesions.                                                                                                               |
| N | B9LUM9 | CC | The N-terminal half is responsible for the 3' incision and the C-terminal half is responsible for the 5' incision (By similarity).                                                              |
| N | B9LUM9 | CC | UvrC both incises the 5' and 3' sides of the lesion                                                                                                                                             |
| N | B9LUM9 | DE | Excinuclease ABC subunit C;                                                                                                                                                                     |
| N | B9LUM9 | DE | Protein uvrC;                                                                                                                                                                                   |
| N | B9LUM9 | DE | UvrABC system protein C;                                                                                                                                                                        |
| N | B9LUM9 | DR | excinuclease ABC activity                                                                                                                                                                       |
| N | B9LUM9 | DR | nucleotide-excision repair                                                                                                                                                                      |
| N | B9LZW2 | CC | Converts 4-diphosphocytidyl-2-C-methyl-D-erythritol 2- phosphate into 2-C-methyl-D-erythritol 2,4-cyclodiphosphate (MECDP) and CMP (By similarity).                                             |
| N | B9LZW2 | DE | 2-C-methyl-D-erythritol 2,4-cyclodiphosphate synthase;                                                                                                                                          |
| N | B9LZW2 | DE | MECDP-synthase;                                                                                                                                                                                 |
| N | B9LZW2 | DR | 2-C-methyl-D-erythritol 2,4-cyclodiphosphate synthase activity                                                                                                                                  |
| N | B9LZW2 | DR | metal ion binding                                                                                                                                                                               |
| N | B9LZW2 | DR | terpenoid biosynthetic process                                                                                                                                                                  |
| N | B9M9W4 | CC | Specifically methylates the N7 position of guanosine in position 527 of 16S rRNA (By similarity).                                                                                               |
| N | B9M9W4 | DE | 16S rRNA 7-methylguanosine methyltransferase;                                                                                                                                                   |
| N | B9M9W4 | DE | 16S rRNA m7G methyltransferase;                                                                                                                                                                 |
| N | B9M9W4 | DE | Ribosomal RNA small subunit methyltransferase G;                                                                                                                                                |
| N | B9M9W4 | DR | rRNA methyltransferase activity                                                                                                                                                                 |
| N | B9MB77 | CC | Protein S19 forms a complex with S13 that binds strongly to the 16S ribosomal RNA (By similarity).                                                                                              |
| N | B9MB77 | DE | 30S ribosomal protein S19;                                                                                                                                                                      |
| N | B9MB77 | DR | structural constituent of ribosome                                                                                                                                                              |
| N | B9ME75 | CC | Catalyzes the irreversible NADPH-dependent deamination of GMP to IMP                                                                                                                            |
| N | B9ME75 | CC | It functions in the conversion of nucleobase, nucleoside and nucleotide derivatives of G to A nucleotides, and in maintaining the intracellular balance of A and G nucleotides (By similarity). |
| N | B9ME75 | DE | GMP reductase;                                                                                                                                                                                  |
| N | B9ME75 | DE | Guanosine 5'-monophosphate oxidoreductase;                                                                                                                                                      |
| N | B9ME75 | DE | Guanosine monophosphate reductase;                                                                                                                                                              |
| N | B9ME75 | DR | GMP reductase activity                                                                                                                                                                          |
| N | B9ME75 | DR | oxidation-reduction process                                                                                                                                                                     |
| N | B9ME75 | DR | purine nucleotide metabolic process                                                                                                                                                             |
| N | B9MGL7 | DE | 30S ribosomal protein S2;                                                                                                                                                                       |
| N | B9MGL7 | DR | structural constituent of ribosome                                                                                                                                                              |
| N | B9MJP2 | CC | Could be a mediator in iron transactions between iron acquisition and iron-requiring processes, such as synthesis and/or repair of Fe-S clusters in biosynthetic enzymes (By similarity).       |
| N | B9MJP2 | DE | Probable Fe(2+)-trafficking protein;                                                                                                                                                            |
| N | B9MJP2 | DR | iron ion binding                                                                                                                                                                                |
| N | B9ML31 | CC | Catalyzes a salvage reaction resulting in the formation of AMP, that is energetically less costly than de novo synthesis (By similarity).                                                       |
| N | B9ML31 | DE | Adenine phosphoribosyltransferase;                                                                                                                                                              |
| N | B9ML31 | DR | adenine phosphoribosyltransferase activity                                                                                                                                                      |
| N | B9ML31 | DR | adenine salvage                                                                                                                                                                                 |
| N | B9ML31 | DR | purine ribonucleoside salvage                                                                                                                                                                   |
| N | B9MPB0 | DE | UPF0145 protein Athe_0545;                                                                                                                                                                      |
| N | C0H429 | DE | Uncharacterized protein yoyB;                                                                                                                                                                   |
| N | C0JAX1 | CC | Catalyzes the hydrolysis of sphingomyelin                                                                                                                                                       |
| N | C0JAX1 | CC | Induces complement-dependent hemolysis, dermonecrosis, blood vessel permeability and platelet aggregation (By similarity).                                                                      |
| N | C0JAX1 | DE | Sphingomyelin phosphodiesterase D LdSicTox-alphaIB1avi;                                                                                                                                         |
| N | C0JAX1 | DE | Sphingomyelinase D;                                                                                                                                                                             |
| N | C0JAX1 | DR | hemolysis in other organism                                                                                                                                                                     |
| N | C0JAX1 | DR | lipid metabolic process                                                                                                                                                                         |
| N | C0JAX1 | DR | metal ion binding                                                                                                                                                                               |

|   |        |    |                                                                                                                                                                                                                                       |
|---|--------|----|---------------------------------------------------------------------------------------------------------------------------------------------------------------------------------------------------------------------------------------|
| N | C0JAX1 | DR | sphingomyelin phosphodiesterase D activity                                                                                                                                                                                            |
| N | C0LGP4 | DE | Probable LRR receptor-like serine/threonine-protein kinase At3g47570;                                                                                                                                                                 |
| N | C0LGP4 | DR | protein phosphorylation                                                                                                                                                                                                               |
| N | C0LGP4 | DR | protein serine/threonine kinase activity                                                                                                                                                                                              |
| N | C0LGP4 | DR | receptor activity                                                                                                                                                                                                                     |
| N | C0LGR9 | DE | Probable LRR receptor-like serine/threonine-protein kinase At4g31250;                                                                                                                                                                 |
| N | C0LGR9 | DR | protein phosphorylation                                                                                                                                                                                                               |
| N | C0LGR9 | DR | protein serine/threonine kinase activity                                                                                                                                                                                              |
| N | C0LGR9 | DR | receptor activity                                                                                                                                                                                                                     |
| N | C0MAR3 | CC | Could be a nuclease that resolves Holliday junction intermediates in genetic recombination (By similarity).                                                                                                                           |
| N | C0MAR3 | DE | Putative Holliday junction resolvase;                                                                                                                                                                                                 |
| N | C0MAR3 | DR | DNA recombination                                                                                                                                                                                                                     |
| N | C0MAR3 | DR | nuclease activity                                                                                                                                                                                                                     |
| N | C0MAR3 | DR | nucleic acid binding                                                                                                                                                                                                                  |
| N | C0ME28 | DE | 50S ribosomal protein L36;                                                                                                                                                                                                            |
| N | C0ME28 | DR | structural constituent of ribosome                                                                                                                                                                                                    |
| N | C0MFF9 | CC | Catalyzes the folate-dependent formation of 5-methyl- uridine at position 54 (M-5-U54) in all tRNAs (By similarity).                                                                                                                  |
| N | C0MFF9 | DE | Folate-dependent tRNA (uracil-5-)-methyltransferase;                                                                                                                                                                                  |
| N | C0MFF9 | DE | Folate-dependent tRNA(M-5-U54)-methyltransferase;                                                                                                                                                                                     |
| N | C0MFF9 | DE | Methylenetetrahydrofolate--tRNA-(uracil-5-)-methyltransferase TrmFO;                                                                                                                                                                  |
| N | C0MFF9 | DR | flavin adenine dinucleotide binding                                                                                                                                                                                                   |
| N | C0MFF9 | DR | methylenetetrahydrofolate-tRNA-(uracil-5-)-methyltransferase (FADH2-oxidizing) activity                                                                                                                                               |
| N | C0MFF9 | DR | tRNA processing                                                                                                                                                                                                                       |
| N | C0MFQ9 | CC | Catalyzes the ATP-dependent amination of UTP to CTP with either L-glutamine or ammonia as the source of nitrogen (By similarity).                                                                                                     |
| N | C0MFQ9 | DE | CTP synthase;                                                                                                                                                                                                                         |
| N | C0MFQ9 | DE | CTP synthetase;                                                                                                                                                                                                                       |
| N | C0MFQ9 | DE | UTP--ammonia ligase;                                                                                                                                                                                                                  |
| N | C0MFQ9 | DR | CTP synthase activity                                                                                                                                                                                                                 |
| N | C0MFQ9 | DR | glutamine metabolic process                                                                                                                                                                                                           |
| N | C0MFQ9 | DR | pyrimidine nucleotide biosynthetic process                                                                                                                                                                                            |
| N | C0PWL9 | CC | Affects glycogen biosynthesis, gluconeogenesis, cell size and surface properties<br>Acts to inhibit interaction between the LBD protein and the A subunit of DNA polymerase                                                           |
| N | C0PWL9 | CC | Also required for motility and flagellum biosynthesis through the post-transcriptional activation of flhDC expression                                                                                                                 |
| N | C0PWL9 | CC | Regulates glycogen synthesis under both aerobic and anaerobic conditions                                                                                                                                                              |
| N | C0PWL9 | CC | Seems to accelerate the degradation of glg gene transcripts, potentially through selective RNA binding                                                                                                                                |
| N | C0PWL9 | CC | This involves binding to and stabilization of the flhDC message by CSPA (By similarity)                                                                                                                                               |
| N | C0PWL9 | DE | Carbon storage regulator;                                                                                                                                                                                                             |
| N | C0PWL9 | DR | mRNA catabolic process                                                                                                                                                                                                                |
| N | C0PWL9 | DR | regulation of carbohydrate metabolic process                                                                                                                                                                                          |
| N | C0PY26 | CC | The glycine cleavage system catalyzes the degradation of glycine                                                                                                                                                                      |
| N | C0PY26 | CC | The P protein binds the alpha-amino group of glycine through its pyridoxal phosphate cofactor; CO(2) is released and the remaining methylamine moiety is then transferred to the lipoamide cofactor of the H protein (By similarity). |
| N | C0PY26 | DE | Glycine cleavage system P-protein;                                                                                                                                                                                                    |
| N | C0PY26 | DE | Glycine decarboxylase;                                                                                                                                                                                                                |
| N | C0PY26 | DE | Glycine dehydrogenase [decarboxylating];                                                                                                                                                                                              |
| N | C0PY26 | DR | glycine dehydrogenase (decarboxylating) activity                                                                                                                                                                                      |
| N | C0PY26 | DR | glycine metabolic process                                                                                                                                                                                                             |
| N | C0PY26 | DR | oxidation-reduction process                                                                                                                                                                                                           |
| N | C0PY26 | DR | pyridoxal phosphate binding                                                                                                                                                                                                           |
| N | C0PZV0 | CC | Modifies the free amino group of the aminoacyl moiety of methionyl-tRNA (Met-tRNA)                                                                                                                                                    |
| N | C0PZV0 | CC | The formyl group appears to play a dual role in the initiator identity of N-formylmethionyl-tRNA by: (I) promoting its recognition by IF2 and (II) impairing its binding to EFTu-GTP (By similarity).                                 |
| N | C0PZV0 | DE | Methionyl-tRNA formyltransferase;                                                                                                                                                                                                     |
| N | C0PZV0 | DR | methionyl-tRNA formyltransferase activity                                                                                                                                                                                             |
| N | C0PZV0 | DR | methyltransferase activity                                                                                                                                                                                                            |
| N | C0Q041 | CC | NDH-1 shuttles electrons from NADH, via FMN and iron- sulfur (Fe-S) centers, to quinones in the respiratory chain                                                                                                                     |

|   |        |    |                                                                                                                                                                                                                                                                  |
|---|--------|----|------------------------------------------------------------------------------------------------------------------------------------------------------------------------------------------------------------------------------------------------------------------|
| N | C0Q041 | CC | Couples the redox reaction to proton translocation (for every two electrons transferred, four hydrogen ions are translocated across the cytoplasmic membrane), and thus conserves the redox energy in a proton gradient (By similarity).                         |
| N | C0Q041 | CC | The immediate electron acceptor for the enzyme in this species is believed to be ubiquinone                                                                                                                                                                      |
| N | C0Q041 | DE | NADH dehydrogenase I subunit C/D;                                                                                                                                                                                                                                |
| N | C0Q041 | DE | NADH-quinone oxidoreductase subunit C/D;                                                                                                                                                                                                                         |
| N | C0Q041 | DE | NDH-1 subunit C/D;                                                                                                                                                                                                                                               |
| N | C0Q041 | DR | NADH dehydrogenase (ubiquinone) activity                                                                                                                                                                                                                         |
| N | C0Q041 | DR | oxidation-reduction process                                                                                                                                                                                                                                      |
| N | C0Q041 | DR | quinone binding                                                                                                                                                                                                                                                  |
| N | C0Q0D3 | CC | Transport system that facilitates potassium-efflux, possibly by potassium-proton antiport (By similarity).                                                                                                                                                       |
| N | C0Q0D3 | DE | Glutathione-regulated potassium-efflux system protein kefB;                                                                                                                                                                                                      |
| N | C0Q0D3 | DE | K(+)/H(+) antiporter;                                                                                                                                                                                                                                            |
| N | C0Q0D3 | DE | NEM-activatable K(+)/H(+) antiporter;                                                                                                                                                                                                                            |
| N | C0Q0D3 | DR | catalytic activity                                                                                                                                                                                                                                               |
| N | C0Q0D3 | DR | glutathione-regulated potassium exporter activity                                                                                                                                                                                                                |
| N | C0Q0D3 | DR | solute:hydrogen antiporter activity                                                                                                                                                                                                                              |
| N | C0Q1G0 | DE | Cytidine monophosphokinase;                                                                                                                                                                                                                                      |
| N | C0Q1G0 | DE | Uridine kinase;                                                                                                                                                                                                                                                  |
| N | C0Q1G0 | DE | Uridine monophosphokinase;                                                                                                                                                                                                                                       |
| N | C0Q1G0 | DR | phosphotransferase activity, alcohol group as acceptor                                                                                                                                                                                                           |
| N | C0Q1G0 | DR | uridine kinase activity                                                                                                                                                                                                                                          |
| N | C0Q319 | CC | Prevents the cell division inhibition by proteins minC and minD at internal division sites while permitting inhibition at polar sites                                                                                                                            |
| N | C0Q319 | CC | This ensures cell division at the proper site by restricting the formation of a division septum at the midpoint of the long axis of the cell (By similarity).                                                                                                    |
| N | C0Q319 | DE | Cell division topological specificity factor;                                                                                                                                                                                                                    |
| N | C0Q319 | DR | cell division                                                                                                                                                                                                                                                    |
| N | C0Q319 | DR | regulation of barrier septum formation                                                                                                                                                                                                                           |
| N | C0Q337 | CC | Provides the cells with the ability to utilize trehalose at high osmolarity by splitting it into glucose molecules that can subsequently be taken up by the phosphotransferase-mediated uptake system (By similarity).                                           |
| N | C0Q337 | DE | Alpha,alpha-trehalase;                                                                                                                                                                                                                                           |
| N | C0Q337 | DE | Alpha,alpha-trehalose glucohydrolase;                                                                                                                                                                                                                            |
| N | C0Q337 | DE | Periplasmic trehalase;                                                                                                                                                                                                                                           |
| N | C0Q337 | DR | alpha,alpha-trehalase activity                                                                                                                                                                                                                                   |
| N | C0Q337 | DR | trehalose metabolic process                                                                                                                                                                                                                                      |
| N | C0Q514 | CC | Represses a number of genes involved in the response to DNA damage (SOS response), including recA and lexA                                                                                                                                                       |
| N | C0Q514 | CC | Binds to the 16 bp palindromic sequence 5'-CTGTATATATACAG-3'                                                                                                                                                                                                     |
| N | C0Q514 | CC | In the presence of single-stranded DNA, recA interacts with lexA causing an autocatalytic cleavage which disrupts the DNA-binding part of lexA, leading to derepression of the SOS regulon and eventually DNA repair (By similarity).                            |
| N | C0Q514 | DE | LexA repressor;                                                                                                                                                                                                                                                  |
| N | C0Q514 | DR | DNA replication                                                                                                                                                                                                                                                  |
| N | C0Q514 | DR | serine-type endopeptidase activity                                                                                                                                                                                                                               |
| N | C0Q550 | CC | Catalyzes the irreversible cleavage of the glycosidic bond in both S-methylthioadenosine (MTA) and S-adenosylhomocysteine (SAH/AdoHcy) to adenine and the corresponding thioribose, 5'-methylthioribose and S-ribosylhomocysteine, respectively (By similarity). |
| N | C0Q550 | DE | 5'-methylthioadenosine nucleosidase;                                                                                                                                                                                                                             |
| N | C0Q550 | DE | 5'-methylthioadenosine/S-adenosylhomocysteine nucleosidase;                                                                                                                                                                                                      |
| N | C0Q550 | DE | AdoHcy nucleosidase;                                                                                                                                                                                                                                             |
| N | C0Q550 | DE | MTA nucleosidase;                                                                                                                                                                                                                                                |
| N | C0Q550 | DE | MTA/SAH nucleosidase;                                                                                                                                                                                                                                            |
| N | C0Q550 | DE | S-adenosylhomocysteine nucleosidase;                                                                                                                                                                                                                             |
| N | C0Q550 | DE | SAH nucleosidase;                                                                                                                                                                                                                                                |
| N | C0Q550 | DE | SRH nucleosidase;                                                                                                                                                                                                                                                |
| N | C0Q550 | DR | L-methionine salvage from methylthioadenosine                                                                                                                                                                                                                    |
| N | C0Q550 | DR | adenosylhomocysteine nucleosidase activity                                                                                                                                                                                                                       |
| N | C0Q550 | DR | methylthioadenosine nucleosidase activity                                                                                                                                                                                                                        |
| N | C0Q550 | DR | nucleoside catabolic process                                                                                                                                                                                                                                     |
| N | C0Q6N0 | CC | Thiolesterase that catalyzes the hydrolysis of S-D- lactoyl-glutathione to form glutathione and D-lactic acid (By similarity).                                                                                                                                   |

|   |        |    |                                                                                                                                                                                                                                              |
|---|--------|----|----------------------------------------------------------------------------------------------------------------------------------------------------------------------------------------------------------------------------------------------|
| N | C0Q6N0 | DE | Glyoxalase II;                                                                                                                                                                                                                               |
| N | C0Q6N0 | DE | Hydroxyacylglutathione hydrolase;                                                                                                                                                                                                            |
| N | C0Q6N0 | DR | hydroxyacylglutathione hydrolase activity                                                                                                                                                                                                    |
| N | C0Q6N0 | DR | zinc ion binding                                                                                                                                                                                                                             |
| N | C0QQM0 | CC | Catalyzes the GTP-dependent ribosomal translocation step during translation elongation                                                                                                                                                       |
| N | C0QQM0 | CC | Catalyzes the coordinated movement of the two tRNA molecules, the mRNA and conformational changes in the ribosome (By similarity).                                                                                                           |
| N | C0QQM0 | CC | During this step, the ribosome changes from the pre-translocational (PRE) to the post- translocational (POST) state as the newly formed A-site-bound peptidyl-tRNA and P-site-bound deacylated tRNA move to the P and E sites, respectively  |
| N | C0QQM0 | DE | Elongation factor G;                                                                                                                                                                                                                         |
| N | C0QQM0 | DR | GTPase activity                                                                                                                                                                                                                              |
| N | C0QQM0 | DR | translation elongation factor activity                                                                                                                                                                                                       |
| N | C0QVZ6 | CC | One of the primary rRNA binding proteins, it binds directly near the 3'-end of the 23S rRNA, where it nucleates assembly of the 50S subunit (By similarity).                                                                                 |
| N | C0QVZ6 | DE | 50S ribosomal protein L3;                                                                                                                                                                                                                    |
| N | C0QVZ6 | DR | structural constituent of ribosome                                                                                                                                                                                                           |
| N | C0R0R3 | DE | 50S ribosomal protein L28;                                                                                                                                                                                                                   |
| N | C0R0R3 | DR | structural constituent of ribosome                                                                                                                                                                                                           |
| N | C0R5B9 | CC | Allows the formation of correctly charged Asn-tRNA(Asn) or Gln-tRNA(Gln) through the transamidation of misacylated Asp- tRNA(Asn) or Glu-tRNA(Gln) in organisms which lack either or both of asparaginyl-tRNA or glutaminyl-tRNA synthetases |
| N | C0R5B9 | CC | The reaction takes place in the presence of glutamine and ATP through an activated phospho-Asp-tRNA(Asn) or phospho-Glu-tRNA(Gln) (By similarity).                                                                                           |
| N | C0R5B9 | DE | Asp/Glu-ADT subunit B;                                                                                                                                                                                                                       |
| N | C0R5B9 | DE | Aspartyl/glutamyl-tRNA(Asn/Gln) amidotransferase subunit B;                                                                                                                                                                                  |
| N | C0R5B9 | DR | carbon-nitrogen ligase activity, with glutamine as amido-N-donor                                                                                                                                                                             |
| N | C0REI6 | CC | Key enzyme in heme biosynthesis                                                                                                                                                                                                              |
| N | C0REI6 | CC | Catalyzes the oxidative decarboxylation of propionic acid side chains of rings A and B of coproporphyrinogen III (By similarity).                                                                                                            |
| N | C0REI6 | DE | Coprogen oxidase;                                                                                                                                                                                                                            |
| N | C0REI6 | DE | Coproporphyrinogen-III oxidase, aerobic;                                                                                                                                                                                                     |
| N | C0REI6 | DE | Coproporphyrinogenase;                                                                                                                                                                                                                       |
| N | C0REI6 | DR | coproporphyrinogen oxidase activity                                                                                                                                                                                                          |
| N | C0REI6 | DR | oxidation-reduction process                                                                                                                                                                                                                  |
| N | C0REI6 | DR | porphyrin biosynthetic process                                                                                                                                                                                                               |
| N | C0REI6 | DR | protein homodimerization activity                                                                                                                                                                                                            |
| N | C0RJI9 | CC | This is 1 of the proteins that binds and probably mediates the attachment of the 5S RNA into the large ribosomal subunit, where it forms part of the central protuberance                                                                    |
| N | C0RJI9 | CC | Contacts the P site tRNA; the 5S rRNA and some of its associated proteins might help stabilize positioning of ribosome-bound tRNAs (By similarity).                                                                                          |
| N | C0RJI9 | CC | In the 70S ribosome it contacts protein S13 of the 30S subunit (bridge B1b), connecting the 2 subunits; this bridge is implicated in subunit movement                                                                                        |
| N | C0RJI9 | DE | 50S ribosomal protein L5;                                                                                                                                                                                                                    |
| N | C0RJI9 | DR | structural constituent of ribosome                                                                                                                                                                                                           |
| N | C0SPB8 | DE | Putative HTH-type transcriptional regulator yvaV;                                                                                                                                                                                            |
| N | C0Z6S0 | DE | Argininosuccinate synthase;                                                                                                                                                                                                                  |
| N | C0Z6S0 | DE | Citrulline--aspartate ligase;                                                                                                                                                                                                                |
| N | C0Z6S0 | DR | arginine biosynthetic process                                                                                                                                                                                                                |
| N | C0Z6S0 | DR | argininosuccinate synthase activity                                                                                                                                                                                                          |
| N | C0ZBY1 | CC | Involved in peptide bond synthesis                                                                                                                                                                                                           |
| N | C0ZBY1 | CC | probably functions indirectly by altering the affinity of the ribosome for aminoacyl-tRNA, thus increasing their reactivity as acceptors for peptidyl transferase (By similarity)                                                            |
| N | C0ZBY1 | CC | Stimulates efficient translation and peptide-bond synthesis on native or reconstituted 70S ribosomes in vitro                                                                                                                                |
| N | C0ZBY1 | DE | Elongation factor P;                                                                                                                                                                                                                         |
| N | C0ZBY1 | DR | peptide biosynthetic process                                                                                                                                                                                                                 |
| N | C0ZBY1 | DR | translation elongation factor activity                                                                                                                                                                                                       |
| N | C0ZP44 | DE | FGAM synthase II;                                                                                                                                                                                                                            |
| N | C0ZP44 | DE | Phosphoribosylformylglycinamide synthase 2;                                                                                                                                                                                                  |
| N | C0ZP44 | DE | Phosphoribosylformylglycinamide synthase II;                                                                                                                                                                                                 |
| N | C0ZP44 | DR | 'de novo' IMP biosynthetic process                                                                                                                                                                                                           |
| N | C0ZP44 | DR | phosphoribosylformylglycinamide synthase activity                                                                                                                                                                                            |
| N | C0ZPH6 | DE | UPF0060 membrane protein RER_49640;                                                                                                                                                                                                          |
| N | C0ZW55 | DE | 50S ribosomal protein L17;                                                                                                                                                                                                                   |



|   |        |    |                                                                                                                                                                                |
|---|--------|----|--------------------------------------------------------------------------------------------------------------------------------------------------------------------------------|
| N | C0ZW55 | DR | structural constituent of ribosome<br>Allows the formation of correctly charged Asn-tRNA(Asn) or Gln-tRNA(Gln)                                                                 |
| N | C0ZXK6 | CC | through the transamidation of misacylated Asp- tRNA(Asn) or Glu-tRNA(Gln) in organisms which lack either or both of asparaginyl-tRNA or glutaminyI-tRNA synthetase             |
| N | C0ZXK6 | CC | The reaction takes place in the presence of glutamine and ATP through an activated phospho-Asp-tRNA(Asn) or phospho-Glu-tRNA(Gln) (By similarity).                             |
| N | C0ZXK6 | DE | Asp/Glu-ADT subunit C;                                                                                                                                                         |
| N | C0ZXK6 | DE | Aspartyl/glutamyl-tRNA(Asn/Gln) amidotransferase subunit C;                                                                                                                    |
| N | C0ZXK6 | DR | ligase activity                                                                                                                                                                |
| N | C0ZXK6 | DR | regulation of translational fidelity                                                                                                                                           |
| N | C1A1G4 | CC | Negative regulator of class 1 heat shock genes (gipe- unaK-unaJ and groEL5 operons)                                                                                            |
| N | C1A1G4 | CC | Prevents heat-shock induction of these operons (By similarity).                                                                                                                |
| N | C1A1G4 | DE | Heat-inducible transcription repressor hrcA;                                                                                                                                   |
| N | C1A1G4 | DR | regulation of transcription, DNA-dependent                                                                                                                                     |
| N | C1A1G4 | DR | response to stress                                                                                                                                                             |
| N | C1A1M0 | CC | Major role in the synthesis of nucleoside triphosphates other than ATP                                                                                                         |
| N | C1A1M0 | CC | The ATP gamma phosphate is transferred to the NDP beta phosphate via a ping-pong mechanism, using a phosphorylated active-site intermediate (By similarity).                   |
| N | C1A1M0 | DE | NDP kinase;                                                                                                                                                                    |
| N | C1A1M0 | DE | Nucleoside diphosphate kinase;                                                                                                                                                 |
| N | C1A1M0 | DE | Nucleoside-2-P kinase;                                                                                                                                                         |
| N | C1A1M0 | DR | CTP biosynthetic process                                                                                                                                                       |
| N | C1A1M0 | DR | GTP biosynthetic process                                                                                                                                                       |
| N | C1A1M0 | DR | UTP biosynthetic process                                                                                                                                                       |
| N | C1A1M0 | DR | metal ion binding                                                                                                                                                              |
| N | C1A1M0 | DR | nucleoside diphosphate kinase activity                                                                                                                                         |
| N | C1A3Y1 | CC | Involved in mRNA degradation                                                                                                                                                   |
| N | C1A3Y1 | CC | Hydrolyzes single-stranded polyribonucleotides processively in the 3'- to 5'-direction (By similarity).                                                                        |
| N | C1A3Y1 | DE | Polynucleotide phosphorylase;                                                                                                                                                  |
| N | C1A3Y1 | DE | Polyribonucleotide nucleotidyltransferase;                                                                                                                                     |
| N | C1A3Y1 | DR | 3'-5'-exoribonuclease activity                                                                                                                                                 |
| N | C1A3Y1 | DR | RNA processing                                                                                                                                                                 |
| N | C1A3Y1 | DR | mRNA catabolic process                                                                                                                                                         |
| N | C1A3Y1 | DR | polyribonucleotide nucleotidyltransferase activity                                                                                                                             |
| N | C1AES0 | CC | Links a guanosine 5'-phosphate to molybdopterin (MPT) forming molybdopterin guanine dinucleotide (MGD) (By similarity).                                                        |
| N | C1AES0 | DE | Probable molybdopterin-guanine dinucleotide biosynthesis protein A;                                                                                                            |
| N | C1AES0 | DR | Mo-molybdopterin cofactor biosynthetic process                                                                                                                                 |
| N | C1AES0 | DR | catalytic activity                                                                                                                                                             |
| N | C1AGC7 | CC | Furnishes a means for formation of correctly charged Gln-tRNA(Gln) through the transamidation of misacylated Glu- tRNA(Gln) in organisms which lack glutaminyI-tRNA synthetase |
| N | C1AGC7 | CC | The reaction takes place in the presence of glutamine and ATP through an activated gamma-phospho-Glu-tRNA(Gln) (By similarity).                                                |
| N | C1AGC7 | DE | Glu-ADT subunit A;                                                                                                                                                             |
| N | C1AGC7 | DE | Glutamyl-tRNA(Gln) amidotransferase subunit A;                                                                                                                                 |
| N | C1AGC7 | DR | carbon-nitrogen ligase activity, with glutamine as amido-N-donor                                                                                                               |
| N | C1AGW8 | DE | NADH pyrophosphatase;                                                                                                                                                          |
| N | C1AGW8 | DR | NAD+ diphosphatase activity                                                                                                                                                    |
| N | C1AGW8 | DR | metal ion binding                                                                                                                                                              |
| N | C1APB4 | DE | Malate synthase G;                                                                                                                                                             |
| N | C1APB4 | DR | glyoxylate cycle                                                                                                                                                               |
| N | C1APB4 | DR | malate synthase activity                                                                                                                                                       |
| N | C1APB4 | DR | tricarboxylic acid cycle                                                                                                                                                       |
| N | C1AQY1 | DE | UPF0256 protein JTY_2426;                                                                                                                                                      |
| N | C1AQY1 | DR | N-acetyltransferase activity                                                                                                                                                   |
| N | C1C5H2 | CC | Furnishes a means for formation of correctly charged Gln-tRNA(Gln) through the transamidation of misacylated Glu- tRNA(Gln) in organisms which lack glutaminyI-tRNA synthetase |
| N | C1C5H2 | CC | The reaction takes place in the presence of glutamine and ATP through an activated gamma-phospho-Glu-tRNA(Gln) (By similarity).                                                |
| N | C1C5H2 | DE | Glu-ADT subunit A;                                                                                                                                                             |
| N | C1C5H2 | DE | Glutamyl-tRNA(Gln) amidotransferase subunit A;                                                                                                                                 |
| N | C1C5H2 | DR | carbon-nitrogen ligase activity, with glutamine as amido-N-donor                                                                                                               |

|   |        |    |                                                                                                                                                                                                       |
|---|--------|----|-------------------------------------------------------------------------------------------------------------------------------------------------------------------------------------------------------|
| N | C1CF92 | CC | Produces ATP from ADP in the presence of a proton gradient across the membrane (By similarity).                                                                                                       |
| N | C1CF92 | DE | ATP synthase F1 sector epsilon subunit;                                                                                                                                                               |
| N | C1CF92 | DE | ATP synthase epsilon chain;                                                                                                                                                                           |
| N | C1CF92 | DE | F-ATPase epsilon subunit;                                                                                                                                                                             |
| N | C1CF92 | DR | ATP synthesis coupled proton transport                                                                                                                                                                |
| N | C1CF92 | DR | hydrogen ion transporting ATP synthase activity, rotational mechanism                                                                                                                                 |
| N | C1CF92 | DR | proton-transporting ATPase activity, rotational mechanism                                                                                                                                             |
| N | C1CH59 | DE | Dihydroxy-acid dehydratase;                                                                                                                                                                           |
| N | C1CH59 | DR | 4 iron, 4 sulfur cluster binding                                                                                                                                                                      |
| N | C1CH59 | DR | branched chain family amino acid biosynthetic process                                                                                                                                                 |
| N | C1CH59 | DR | dihydroxy-acid dehydratase activity                                                                                                                                                                   |
| N | C1CH59 | DR | metal ion binding                                                                                                                                                                                     |
| N | C1CHL4 | DE | 30S ribosomal protein S2;                                                                                                                                                                             |
| N | C1CHL4 | DR | structural constituent of ribosome                                                                                                                                                                    |
| N | C1CK08 | DE | Agmatine iminohydrolase;                                                                                                                                                                              |
| N | C1CK08 | DE | Putative agmatine deiminase;                                                                                                                                                                          |
| N | C1CK08 | DR | agmatine deiminase activity                                                                                                                                                                           |
| N | C1CK08 | DR | putrescine biosynthetic process                                                                                                                                                                       |
| N | C1CLS6 | CC | Catalyzes a salvage reaction resulting in the formation of AMP, that is energetically less costly than de novo synthesis (By similarity).                                                             |
| N | C1CLS6 | DE | Adenine phosphoribosyltransferase;                                                                                                                                                                    |
| N | C1CLS6 | DR | adenine phosphoribosyltransferase activity                                                                                                                                                            |
| N | C1CLS6 | DR | adenine salvage                                                                                                                                                                                       |
| N | C1CLS6 | DR | purine ribonucleoside salvage                                                                                                                                                                         |
| N | C1CNH8 | CC | Binds to the 23S rRNA (By similarity).                                                                                                                                                                |
| N | C1CNH8 | DE | 50S ribosomal protein L9;                                                                                                                                                                             |
| N | C1CNH8 | DR | structural constituent of ribosome                                                                                                                                                                    |
| N | C1CP95 | CC | Binds 23S rRNA and is also seen to make contacts with the A and possibly P site tRNAs (By similarity).                                                                                                |
| N | C1CP95 | DE | 50S ribosomal protein L16;                                                                                                                                                                            |
| N | C1CP95 | DR | structural constituent of ribosome                                                                                                                                                                    |
| N | C1CQU5 | CC | Transfers the N-acyl diglyceride group on what will become the N-terminal cysteine of membrane lipoproteins (By similarity).                                                                          |
| N | C1CQU5 | DE | Prolipoprotein diacylglyceryl transferase;                                                                                                                                                            |
| N | C1CQU5 | DR | lipoprotein biosynthetic process                                                                                                                                                                      |
| N | C1CQU5 | DR | protein lipoylation                                                                                                                                                                                   |
| N | C1CQU5 | DR | transferase activity, transferring glycosyl groups                                                                                                                                                    |
| N | C1CQY1 | DE | 5-enolpyruvylshikimate-3-phosphate phospholyase;                                                                                                                                                      |
| N | C1CQY1 | DE | Chorismate synthase;                                                                                                                                                                                  |
| N | C1CQY1 | DR | aromatic amino acid family biosynthetic process                                                                                                                                                       |
| N | C1CQY1 | DR | chorismate synthase activity                                                                                                                                                                          |
| N | C1CRS4 | CC | Binds specifically to the ssrA RNA (tmRNA) and is required for stable association of ssrA with ribosomes (By similarity).                                                                             |
| N | C1CRS4 | DE | SsrA-binding protein;                                                                                                                                                                                 |
| N | C1CSZ4 | CC | Modifies the free amino group of the aminoacyl moiety of methionyl-tRNA (Met-tRNA).                                                                                                                   |
| N | C1CSZ4 | CC | The formyl group appears to play a dual role in the initiator identity of N-formylmethionyl-tRNA by: (I) promoting its recognition by IF2 and (II) impairing its binding to EFTu-GTP (By similarity). |
| N | C1CSZ4 | DE | Methionyl-tRNA formyltransferase;                                                                                                                                                                     |
| N | C1CSZ4 | DR | methionyl-tRNA formyltransferase activity                                                                                                                                                             |
| N | C1CSZ4 | DR | methyltransferase activity                                                                                                                                                                            |
| N | C1CV29 | DE | Phosphoglycerate kinase;                                                                                                                                                                              |
| N | C1CV29 | DR | phosphoglycerate kinase activity                                                                                                                                                                      |
| N | C1D5M0 | CC | First step of the lipid cycle reactions in the biosynthesis of the cell wall peptidoglycan (By similarity).                                                                                           |
| N | C1D5M0 | DE | Phospho-N-acetylmuramoyl-pentapeptide-transferase;                                                                                                                                                    |
| N | C1D5M0 | DE | UDP-MurNAc-pentapeptide phosphotransferase;                                                                                                                                                           |
| N | C1D5M0 | DR | UDP-N-acetylmuramoyl-L-alanyl-D-glutamyl-meso-2,6-diaminopimelyl-D-alanyl-D-alanine:undecaprenyl-phosphate transferase activity                                                                       |
| N | C1D5M0 | DR | cell division                                                                                                                                                                                         |
| N | C1D5M0 | DR | cellular cell wall organization                                                                                                                                                                       |
| N | C1D5M0 | DR | peptidoglycan biosynthetic process                                                                                                                                                                    |
| N | C1D5M0 | DR | phospho-N-acetylmuramoyl-pentapeptide-transferase activity                                                                                                                                            |
| N | C1D5M0 | DR | regulation of cell shape                                                                                                                                                                              |

|   |        |    |                                                                                                                                                                                                                                                                                                              |
|---|--------|----|--------------------------------------------------------------------------------------------------------------------------------------------------------------------------------------------------------------------------------------------------------------------------------------------------------------|
| N | C1D5M8 | CC | Allows the formation of correctly charged Asn-tRNA(Asn) or Gln-tRNA(Gln) through the transamidation of misacylated Asp- tRNA(Asn) or Glu-tRNA(Gln) in organisms which lack either or both of asparaginyl-tRNA or glutaminyl-tRNA synthetases                                                                 |
| N | C1D5M8 | CC | The reaction takes place in the presence of glutamine and ATP through an activated phospho-Asp-tRNA(Asn) or phospho-Glu-tRNA(Gln) (By similarity).                                                                                                                                                           |
| N | C1D5M8 | DE | Asp/Glu-ADT subunit B;                                                                                                                                                                                                                                                                                       |
| N | C1D5M8 | DE | Aspartyl/glutamyl-tRNA(Asn/Gln) amidotransferase subunit B;                                                                                                                                                                                                                                                  |
| N | C1D5M8 | DR | carbon-nitrogen ligase activity, with glutamine as amido-N-donor                                                                                                                                                                                                                                             |
| N | C1D6J9 | CC | Catalyzes the attachment of valine to tRNA(Val)<br>As ValRS can inadvertently accommodate and process structurally similar amino acids such as threonine, to avoid such errors, it has a "posttransfer" editing activity that hydrolyzes mischarged Thr-tRNA(Val) in a tRNA-dependent manner (By similarity) |
| N | C1D6J9 | DE | Valine--tRNA ligase;                                                                                                                                                                                                                                                                                         |
| N | C1D6J9 | DE | Valyl-tRNA synthetase;                                                                                                                                                                                                                                                                                       |
| N | C1D6J9 | DR | valine-tRNA ligase activity                                                                                                                                                                                                                                                                                  |
| N | C1D6J9 | DR | valyl-tRNA aminoacylation                                                                                                                                                                                                                                                                                    |
| N | C1DIX6 | CC | Catalyzes the addition and repair of the essential 3'- terminal CCA sequence in tRNAs without using a nucleic acid template                                                                                                                                                                                  |
| N | C1DIX6 | CC | Adds these three nucleotides in the order of C, C, and A to the tRNA nucleotide-73, using CTP and ATP as substrates and producing inorganic pyrophosphate                                                                                                                                                    |
| N | C1DIX6 | CC | Also shows phosphatase, 2'- nucleotidase and 2',5'-cyclic phosphodiesterase activities                                                                                                                                                                                                                       |
| N | C1DIX6 | CC | These phosphohydrolase activities are probably involved in the repair of the tRNA 3'-CCA terminus degraded by intracellular RNases (By similarity).                                                                                                                                                          |
| N | C1DIX6 | DE | 2',3'-cyclic phosphodiesterase;                                                                                                                                                                                                                                                                              |
| N | C1DIX6 | DE | 2'-nucleotidase;                                                                                                                                                                                                                                                                                             |
| N | C1DIX6 | DE | CCA tRNA nucleotidyltransferase;                                                                                                                                                                                                                                                                             |
| N | C1DIX6 | DE | CCA-adding enzyme;                                                                                                                                                                                                                                                                                           |
| N | C1DIX6 | DE | Multifunctional CCA protein;                                                                                                                                                                                                                                                                                 |
| N | C1DIX6 | DE | Phosphatase;                                                                                                                                                                                                                                                                                                 |
| N | C1DIX6 | DE | tRNA CCA-pyrophosphorylase;                                                                                                                                                                                                                                                                                  |
| N | C1DIX6 | DE | tRNA adenylyl-/cytidylyl-transferase;                                                                                                                                                                                                                                                                        |
| N | C1DIX6 | DE | tRNA nucleotidyltransferase;                                                                                                                                                                                                                                                                                 |
| N | C1DIX6 | DR | hydrolase activity                                                                                                                                                                                                                                                                                           |
| N | C1DIX6 | DR | metal ion binding                                                                                                                                                                                                                                                                                            |
| N | C1DIX6 | DR | tRNA 3'-terminal CCA addition                                                                                                                                                                                                                                                                                |
| N | C1DIX6 | DR | tRNA adenylyltransferase activity                                                                                                                                                                                                                                                                            |
| N | C1DKN4 | DE | 50S ribosomal protein L36;                                                                                                                                                                                                                                                                                   |
| N | C1DKN4 | DR | structural constituent of ribosome                                                                                                                                                                                                                                                                           |
| N | C1DSX5 | CC | Catalyzes the reversible transfer of the terminal phosphate group between ATP and AMP                                                                                                                                                                                                                        |
| N | C1DSX5 | CC | This small ubiquitous enzyme involved in the energy metabolism and nucleotide synthesis, is essential for maintenance and cell growth (By similarity).                                                                                                                                                       |
| N | C1DSX5 | DE | ATP-AMP transphosphorylase;                                                                                                                                                                                                                                                                                  |
| N | C1DSX5 | DE | Adenylate kinase;                                                                                                                                                                                                                                                                                            |
| N | C1DSX5 | DR | adenylate kinase activity                                                                                                                                                                                                                                                                                    |
| N | C1DSX5 | DR | nucleotide biosynthetic process                                                                                                                                                                                                                                                                              |
| N | C1EPX5 | DE | UPF0223 protein BCA_4066;                                                                                                                                                                                                                                                                                    |
| N | C1F934 | CC | The glycine cleavage system catalyzes the degradation of glycine                                                                                                                                                                                                                                             |
| N | C1F934 | CC | The H protein shuttles the methylamine group of glycine from the P protein to the T protein (By similarity).                                                                                                                                                                                                 |
| N | C1F934 | DE | Glycine cleavage system H protein;                                                                                                                                                                                                                                                                           |
| N | C1F934 | DR | glycine decarboxylation via glycine cleavage system                                                                                                                                                                                                                                                          |
| N | C1KZ32 | DE | 4-methyl-5-beta-hydroxyethylthiazole kinase;                                                                                                                                                                                                                                                                 |
| N | C1KZ32 | DE | Hydroxyethylthiazole kinase;                                                                                                                                                                                                                                                                                 |
| N | C1KZ32 | DE | Thz kinase;                                                                                                                                                                                                                                                                                                  |
| N | C1KZ32 | DR | hydroxyethylthiazole kinase activity                                                                                                                                                                                                                                                                         |
| N | C1KZ32 | DR | metal ion binding                                                                                                                                                                                                                                                                                            |
| N | C1KZ32 | DR | thiamine biosynthetic process                                                                                                                                                                                                                                                                                |
| N | C1L0D5 | CC | Converts N-acetylmannosamine-6-phosphate (ManNAc-6-P) to N-acetylglucosamine-6-phosphate (GlcNAc-6-P) (Potential).                                                                                                                                                                                           |
| N | C1L0D5 | DE | ManNAc-6-P epimerase;                                                                                                                                                                                                                                                                                        |
| N | C1L0D5 | DE | Putative N-acetylmannosamine-6-phosphate 2-epimerase;                                                                                                                                                                                                                                                        |
| N | C1L0D5 | DR | N-acetylmannosamine metabolic process                                                                                                                                                                                                                                                                        |
| N | C1L0D5 | DR | N-acetylglucosamine-6-phosphate 2-epimerase activity                                                                                                                                                                                                                                                         |
| N | C1P607 | CC | May be a toxic protein; overexpression causes cessation of growth.                                                                                                                                                                                                                                           |

|   |         |    |                                                                                                                                                               |
|---|---------|----|---------------------------------------------------------------------------------------------------------------------------------------------------------------|
| N | C1P607  | DE | Small toxic protein ibsA;                                                                                                                                     |
| N | C3K1L3  | DE | Histidine--tRNA ligase;                                                                                                                                       |
| N | C3K1L3  | DE | Histidyl-tRNA synthetase;                                                                                                                                     |
| N | C3K1L3  | DR | histidine-tRNA ligase activity                                                                                                                                |
| N | C3K1L3  | DR | histidyl-tRNA aminoacylation                                                                                                                                  |
| N | C3KVN0  | CC | Catalyzes the reversible transfer of the terminal phosphate group between ATP and AMP                                                                         |
| N | C3KVN0  | CC | This small ubiquitous enzyme involved in the energy metabolism and nucleotide synthesis, is essential for maintenance and cell growth (By similarity).        |
| N | C3KVN0  | DE | ATP-AMP transphosphorylase;                                                                                                                                   |
| N | C3KVN0  | DE | Adenylate kinase;                                                                                                                                             |
| N | C3KVN0  | DR | adenylate kinase activity                                                                                                                                     |
| N | C3KVN0  | DR | metal ion binding                                                                                                                                             |
| N | C3KVN0  | DR | nucleotide biosynthetic process                                                                                                                               |
| N | C3KVQ9  | CC | DNA-dependent RNA polymerase catalyzes the transcription of DNA into RNA using the four ribonucleoside triphosphates as substrates (By similarity).           |
| N | C3KVQ9  | DE | DNA-directed RNA polymerase subunit beta;                                                                                                                     |
| N | C3KVQ9  | DE | RNA polymerase subunit beta;                                                                                                                                  |
| N | C3KVQ9  | DE | RNAP subunit beta;                                                                                                                                            |
| N | C3KVQ9  | DE | Transcriptase subunit beta;                                                                                                                                   |
| N | C3KVQ9  | DR | DNA-directed RNA polymerase activity                                                                                                                          |
| N | C3KVQ9  | DR | ribonucleoside binding                                                                                                                                        |
| N | C3K VX7 | DE | Phosphoribosyl-AMP cyclohydrolase;                                                                                                                            |
| N | C3K VX7 | DR | histidine biosynthetic process                                                                                                                                |
| N | C3K VX7 | DR | phosphoribosyl-AMP cyclohydrolase activity                                                                                                                    |
| N | C3L0J9  | DE | 50S ribosomal protein L28;                                                                                                                                    |
| N | C3L0J9  | DR | structural constituent of ribosome                                                                                                                            |
| N | C3L529  | DE | Phosphoribosylaminoimidazole-succinocarboxamide synthase;                                                                                                     |
| N | C3L529  | DE | SAICAR synthetase;                                                                                                                                            |
| N | C3L529  | DR | phosphoribosylaminoimidazolesuccinocarboxamide synthase activity                                                                                              |
| N | C3L529  | DR | purine nucleotide biosynthetic process                                                                                                                        |
| N | C3LJA1  | CC | Binds to the 23S rRNA (By similarity).                                                                                                                        |
| N | C3LJA1  | DE | 50S ribosomal protein L15;                                                                                                                                    |
| N | C3LJA1  | DR | structural constituent of ribosome                                                                                                                            |
| N | C3LQ26  | CC | Catalyzes the NADP-dependent rearrangement and reduction of 1-deoxy-D-xylulose-5-phosphate (DXP) to 2-C-methyl-D-erythritol 4-phosphate (MEP) (By similarity) |
| N | C3LQ26  | DE | 1-deoxy-D-xylulose 5-phosphate reductoisomerase;                                                                                                              |
| N | C3LQ26  | DE | 1-deoxyxylulose-5-phosphate reductoisomerase;                                                                                                                 |
| N | C3LQ26  | DE | 2-C-methyl-D-erythritol 4-phosphate synthase;                                                                                                                 |
| N | C3LQ26  | DE | DXP reductoisomerase;                                                                                                                                         |
| N | C3LQ26  | DR | 1-deoxy-D-xylulose-5-phosphate reductoisomerase activity                                                                                                      |
| N | C3LQ26  | DR | isoprenoid biosynthetic process                                                                                                                               |
| N | C3LQ26  | DR | metal ion binding                                                                                                                                             |
| N | C3LQ26  | DR | oxidation-reduction process                                                                                                                                   |
| N | C3M9Z9  | DE | UPF0434 protein NGR_c31900;                                                                                                                                   |
| N | C3MAL6  | CC | Converts 2C-methyl-D-erythritol 2,4-cyclodiphosphate (ME-2,4cPP) into 1-hydroxy-2-methyl-2-(E)-butenyl 4-diphosphate (By similarity).                         |
| N | C3MAL6  | DE | 1-hydroxy-2-methyl-2-(E)-butenyl 4-diphosphate synthase;                                                                                                      |
| N | C3MAL6  | DE | 4-hydroxy-3-methylbut-2-en-1-yl diphosphate synthase;                                                                                                         |
| N | C3MAL6  | DR | 4 iron, 4 sulfur cluster binding                                                                                                                              |
| N | C3MAL6  | DR | 4-hydroxy-3-methylbut-2-en-1-yl diphosphate synthase activity                                                                                                 |
| N | C3MAL6  | DR | iron ion binding                                                                                                                                              |
| N | C3MAL6  | DR | oxidation-reduction process                                                                                                                                   |
| N | C3MAL6  | DR | terpenoid biosynthetic process                                                                                                                                |
| N | C3MBW4  | DE | UPF0758 protein NGR_c13970;                                                                                                                                   |
| N | C3MF41  | DE | Acetylglutamate kinase;                                                                                                                                       |
| N | C3MF41  | DE | N-acetyl-L-glutamate 5-phosphotransferase;                                                                                                                    |
| N | C3MF41  | DR | acetylglutamate kinase activity                                                                                                                               |
| N | C3MF41  | DR | arginine biosynthetic process                                                                                                                                 |
| N | C3MF41  | DR | glutamate 5-kinase activity                                                                                                                                   |
| N | C3MF41  | DR | proline biosynthetic process                                                                                                                                  |
| N | C3MPZ8  | DE | UPF0147 protein LS215_1454;                                                                                                                                   |
| N | C3MRT0  | CC | Catalyzes the synthesis of GMP from XMP (By similarity).                                                                                                      |
| N | C3MRT0  | DE | GMP synthase [glutamine-hydrolyzing] subunit B;                                                                                                               |
| N | C3MRT0  | DE | GMP synthetase;                                                                                                                                               |

|   |        |    |                                                                                                                                                                                          |
|---|--------|----|------------------------------------------------------------------------------------------------------------------------------------------------------------------------------------------|
| N | C3MRT0 | DR | GMP biosynthetic process                                                                                                                                                                 |
| N | C3MRT0 | DR | GMP synthase (glutamine-hydrolyzing) activity                                                                                                                                            |
| N | C3N0Q3 | DE | UPF0282 protein M1627_2198;                                                                                                                                                              |
| N | C3N0Q3 | DR | hydrolase activity                                                                                                                                                                       |
| N | C3NGV0 | CC | Produces ATP from ADP in the presence of a proton gradient across the membrane (By similarity).                                                                                          |
| N | C3NGV0 | DE | V-ATPase subunit E;                                                                                                                                                                      |
| N | C3NGV0 | DE | V-type proton ATPase subunit E;                                                                                                                                                          |
| N | C3NGV0 | DR | ATP biosynthetic process                                                                                                                                                                 |
| N | C3NGV0 | DR | ATP hydrolysis coupled proton transport                                                                                                                                                  |
| N | C3NGV0 | DR | proton-transporting ATPase activity, rotational mechanism                                                                                                                                |
| N | C3NHZ7 | DE | UPF0200 protein YN1551_1675;                                                                                                                                                             |
| N | C3NHZ7 | DR | nucleobase, nucleoside, nucleotide and nucleic acid metabolic process                                                                                                                    |
| N | C3NHZ7 | DR | nucleobase, nucleoside, nucleotide kinase activity                                                                                                                                       |
| N | C3NHZ7 | DR | nucleoside-triphosphatase activity                                                                                                                                                       |
| N | C3NJ84 | CC | Hydrolyzes D-tyrosyl-tRNA(Tyr) into D-tyrosine and free tRNA(Tyr) (By similarity)                                                                                                        |
| N | C3NJ84 | DE | D-tyrosyl-tRNA(Tyr) deacylase;                                                                                                                                                           |
| N | C3NJ84 | DR | hydrolase activity, acting on ester bonds                                                                                                                                                |
| N | C3NJ84 | DR | metal ion binding                                                                                                                                                                        |
| N | C3NL04 | CC | Removes 5-oxoproline from various penultimate amino acid residues except L-proline (By similarity).                                                                                      |
| N | C3NL04 | DE | 5-oxoprol-yl-peptidase;                                                                                                                                                                  |
| N | C3NL04 | DE | Pyroglutamyl-peptidase I;                                                                                                                                                                |
| N | C3NL04 | DE | Pyrrolidone-carboxylate peptidase;                                                                                                                                                       |
| N | C3NL04 | DR | cysteine-type peptidase activity                                                                                                                                                         |
| N | C3NMG3 | DE | Protease HtpX homolog;                                                                                                                                                                   |
| N | C3NMG3 | DR | metal ion binding                                                                                                                                                                        |
| N | C3NMG3 | DR | metalloendopeptidase activity                                                                                                                                                            |
| N | C3P002 | DE | UPF0178 protein BAA_3113;                                                                                                                                                                |
| N | C3P210 | CC | Catalyzes the reversible conversion of 3- phosphohydroxypyruvate to phosphoserine and of 3-hydroxy-2-oxo-4- phosphonooxybutanoate to phosphohydroxythreonine (By similarity).            |
| N | C3P210 | DE | Phosphohydroxythreonine aminotransferase;                                                                                                                                                |
| N | C3P210 | DE | Phosphoserine aminotransferase;                                                                                                                                                          |
| N | C3P210 | DR | L-serine biosynthetic process                                                                                                                                                            |
| N | C3P210 | DR | O-phospho-L-serine:2-oxoglutarate aminotransferase activity                                                                                                                              |
| N | C3P210 | DR | pyridoxal phosphate binding                                                                                                                                                              |
| N | C3P2J7 | CC | Inhibits the expression or activity of extracellular murein hydrolases by interacting, possibly with LrgB, with the holin-like protein CidA                                              |
| N | C3P2J7 | CC | May be involved in programmed cell death (PCD), possibly triggering PCD in response to antibiotics and environmental stresses (By similarity).                                           |
| N | C3P2J7 | CC | The LrgAB and CidA proteins may affect the proton motive force of the membrane                                                                                                           |
| N | C3P2J7 | DE | Antiholin-like protein LrgA;                                                                                                                                                             |
| N | C3P655 | CC | Is responsible for channeling the electrons from the oxidation of dihydroorotate from the FMN redox center in the pyrD subunit to the ultimate electron acceptor NAD(+) (By similarity). |
| N | C3P655 | DE | Dihydroorotate dehydrogenase electron transfer subunit;                                                                                                                                  |
| N | C3P655 | DR | 2 iron, 2 sulfur cluster binding                                                                                                                                                         |
| N | C3P655 | DR | electron carrier activity                                                                                                                                                                |
| N | C3P655 | DR | electron transport chain                                                                                                                                                                 |
| N | C3P655 | DR | flavin adenine dinucleotide binding                                                                                                                                                      |
| N | C3P655 | DR | metal ion binding                                                                                                                                                                        |
| N | C3P655 | DR | oxidoreductase activity                                                                                                                                                                  |
| N | C3P655 | DR | pyrimidine nucleotide biosynthetic process                                                                                                                                               |
| N | C3P9H5 | CC | Phosphorylation of dTMP to form dTDP in both de novo and salvage pathways of dTTP synthesis (By similarity).                                                                             |
| N | C3P9H5 | DE | Thymidylate kinase;                                                                                                                                                                      |
| N | C3P9H5 | DE | dTMP kinase;                                                                                                                                                                             |
| N | C3P9H5 | DR | dTDP biosynthetic process                                                                                                                                                                |
| N | C3P9H5 | DR | thymidylate kinase activity                                                                                                                                                              |
| N | C3PAG3 | DE | 50S ribosomal protein L35;                                                                                                                                                               |
| N | C3PAG3 | DR | structural constituent of ribosome                                                                                                                                                       |
| N | C3PDH0 | DE | DAP epimerase;                                                                                                                                                                           |
| N | C3PDH0 | DE | Diaminopimelate epimerase;                                                                                                                                                               |
| N | C3PDH0 | DR | diaminopimelate epimerase activity                                                                                                                                                       |

|   |        |    |                                                                                                                                                                        |
|---|--------|----|------------------------------------------------------------------------------------------------------------------------------------------------------------------------|
| N | C3PDH0 | DR | lysine biosynthetic process via diaminopimelate                                                                                                                        |
| N | C3PGA3 | CC | Catalyzes the covalent attachment of the prokaryotic ubiquitin-like protein modifier Pup to the proteasomal substrate proteins, thereby targeting them for degradation |
| N | C3PGA3 | CC | The tagging reaction involves the side-chain carboxylate of the C-terminal glutamate of Pup and the side-chain amino group of a substrate lysine (By similarity)       |
| N | C3PGA3 | CC | This tagging system is termed pupylation                                                                                                                               |
| N | C3PGA3 | DE | Proteasome accessory factor A;                                                                                                                                         |
| N | C3PGA3 | DE | Pup--protein ligase;                                                                                                                                                   |
| N | C3PGA3 | DE | Pup-conjugating enzyme;                                                                                                                                                |
| N | C3PGA3 | DR | acid-amino acid ligase activity                                                                                                                                        |
| N | C3PGA3 | DR | modification-dependent protein catabolic process                                                                                                                       |
| N | C3PGA3 | DR | proteasomal protein catabolic process                                                                                                                                  |
| N | C3PKR1 | CC | One of the primary rRNA binding proteins, it binds specifically to the 5'-end of 16S ribosomal RNA (By similarity).                                                    |
| N | C3PKR1 | DE | 30S ribosomal protein S17;                                                                                                                                             |
| N | C3PKR1 | DR | structural constituent of ribosome                                                                                                                                     |
| N | C3PM69 | CC | Required for the formation of a threonylcarbamoyl group on adenosine at position 37 (t(6)A37) in tRNAs that read codons beginning with adenine (By similarity)         |
| N | C3PM69 | DE | Probable tRNA threonylcarbamoyladenine biosynthesis protein Gcp;                                                                                                       |
| N | C3PM69 | DE | t(6)A37 threonylcarbamoyladenine biosynthesis protein;                                                                                                                 |
| N | C3PM69 | DR | metal ion binding                                                                                                                                                      |
| N | C3PM69 | DR | metalloendopeptidase activity                                                                                                                                          |
| N | C4K4F8 | CC | This protein promotes the GTP-dependent binding of aminoacyl-tRNA to the A-site of ribosomes during protein biosynthesis (By similarity).                              |
| N | C4K4F8 | DE | Elongation factor Tu;                                                                                                                                                  |
| N | C4K4F8 | DR | GTPase activity                                                                                                                                                        |
| N | C4K4F8 | DR | translation elongation factor activity                                                                                                                                 |
| N | C4K6N8 | CC | The UvrABC repair system catalyzes the recognition and processing of DNA lesions                                                                                       |
| N | C4K6N8 | CC | A damage recognition complex composed of 2 uvrA and 2 uvrB subunits scans DNA for abnormalities                                                                        |
| N | C4K6N8 | CC | DNA wrap is dependent on ATP binding by uvrB and probably causes local melting of the DNA helix, facilitating insertion of uvrB beta-hairpin between the DNA strands   |
| N | C4K6N8 | CC | If a lesion is found the uvrA subunits dissociate and the uvrB-DNA preincision complex is formed                                                                       |
| N | C4K6N8 | CC | If no lesion is found, the DNA wraps around the other uvrB subunit that will check the other stand for damage (By similarity).                                         |
| N | C4K6N8 | CC | Then uvrB probes one DNA strand for the presence of a lesion                                                                                                           |
| N | C4K6N8 | CC | This complex is subsequently bound by uvrC and the second uvrB is released                                                                                             |
| N | C4K6N8 | CC | Upon binding of the uvrA(2)B(2) complex to a putative damaged site, the DNA wraps around one uvrB monomer                                                              |
| N | C4K6N8 | DE | Excinuclease ABC subunit B;                                                                                                                                            |
| N | C4K6N8 | DE | Protein uvrB;                                                                                                                                                          |
| N | C4K6N8 | DE | UvrABC system protein B;                                                                                                                                               |
| N | C4K6N8 | DR | excinuclease ABC activity                                                                                                                                              |
| N | C4K6N8 | DR | helicase activity                                                                                                                                                      |
| N | C4K6N8 | DR | nucleotide-excision repair                                                                                                                                             |
| N | C4KIY2 | CC | Catalyzes the formation of S-adenosylmethionine from methionine and ATP (By similarity).                                                                               |
| N | C4KIY2 | DE | AdoMet synthase;                                                                                                                                                       |
| N | C4KIY2 | DE | Methionine adenosyltransferase;                                                                                                                                        |
| N | C4KIY2 | DE | S-adenosylmethionine synthase;                                                                                                                                         |
| N | C4KIY2 | DR | methionine adenosyltransferase activity                                                                                                                                |
| N | C4KIY2 | DR | one-carbon metabolic process                                                                                                                                           |
| N | C4KZL3 | CC | This protein is one of the early assembly proteins of the 50S ribosomal subunit, although it is not seen to bind rRNA by itself                                        |
| N | C4KZL3 | CC | It is important during the early stages of 50S assembly (By similarity).                                                                                               |
| N | C4KZL3 | DE | 50S ribosomal protein L13;                                                                                                                                             |
| N | C4KZL3 | DR | structural constituent of ribosome                                                                                                                                     |
| N | C4L0Z7 | DE | UPF0234 protein EAT1b_2037;                                                                                                                                            |
| N | C4L379 | CC | Participates in chromosomal partition during cell division                                                                                                             |
| N | C4L379 | CC | May act via the formation of a condensin-like complex containing smc and scpB that pull DNA away from mid-cell into both cell halves (By similarity).                  |
| N | C4L379 | DE | Segregation and condensation protein A;                                                                                                                                |
| N | C4L379 | DR | cell division                                                                                                                                                          |
| N | C4L379 | DR | chromosome segregation                                                                                                                                                 |

|   |        |    |                                                                                                                                                                                                                              |
|---|--------|----|------------------------------------------------------------------------------------------------------------------------------------------------------------------------------------------------------------------------------|
| N | C4LAG9 | CC | Regulates arginine biosynthesis genes (By similarity).                                                                                                                                                                       |
| N | C4LAG9 | DE | Arginine repressor;                                                                                                                                                                                                          |
| N | C4LAG9 | DR | arginine biosynthetic process                                                                                                                                                                                                |
| N | C4LAG9 | DR | regulation of transcription, DNA-dependent                                                                                                                                                                                   |
| N | C4LAG9 | DR | sequence-specific DNA binding transcription factor activity                                                                                                                                                                  |
| N | C4LDE6 | DE | GTP cyclohydrolase 1;                                                                                                                                                                                                        |
| N | C4LDE6 | DE | GTP cyclohydrolase I;                                                                                                                                                                                                        |
| N | C4LDE6 | DR | GTP cyclohydrolase I activity                                                                                                                                                                                                |
| N | C4LDE6 | DR | metal ion binding                                                                                                                                                                                                            |
| N | C4LDE6 | DR | one-carbon metabolic process                                                                                                                                                                                                 |
| N | C4LDE6 | DR | tetrahydrofolate biosynthetic process                                                                                                                                                                                        |
| N | C4LDK0 | CC | Catalyzes the dehydration of L-rhamnonate to 2-keto-3- deoxy-L-rhamnonate (KDR) (By similarity).                                                                                                                             |
| N | C4LDK0 | DE | L-rhamnonate dehydratase;                                                                                                                                                                                                    |
| N | C4LDK0 | DR | L-rhamnonate dehydratase activity                                                                                                                                                                                            |
| N | C4LDK0 | DR | cellular amino acid catabolic process                                                                                                                                                                                        |
| N | C4LDK0 | DR | metal ion binding                                                                                                                                                                                                            |
| N | C4LJF0 | CC | Catalyzes the isomerization between 2-isopropylmalate and 3-isopropylmalate, via the formation of 2-isopropylmaleate (By similarity).                                                                                        |
| N | C4LJF0 | DE | 3-isopropylmalate dehydratase small subunit;                                                                                                                                                                                 |
| N | C4LJF0 | DE | Alpha-IPM isomerase;                                                                                                                                                                                                         |
| N | C4LJF0 | DE | Isopropylmalate isomerase;                                                                                                                                                                                                   |
| N | C4LJF0 | DR | 3-isopropylmalate dehydratase activity                                                                                                                                                                                       |
| N | C4LJF0 | DR | leucine biosynthetic process                                                                                                                                                                                                 |
| N | C4XIK1 | DE | UPF0082 protein DMR_30850;                                                                                                                                                                                                   |
| N | C4XJU6 | CC | Catalyzes the isomerization of sedoheptulose 7-phosphate in D-glycero-D-manno-heptose 7-phosphate (By similarity).                                                                                                           |
| N | C4XJU6 | DE | Phosphoheptose isomerase;                                                                                                                                                                                                    |
| N | C4XJU6 | DE | Sedoheptulose 7-phosphate isomerase;                                                                                                                                                                                         |
| N | C4XJU6 | DR | D-sedoheptulose 7-phosphate isomerase activity                                                                                                                                                                               |
| N | C4XJU6 | DR | carbohydrate metabolic process                                                                                                                                                                                               |
| N | C4XJU6 | DR | metal ion binding                                                                                                                                                                                                            |
| N | C4XJU6 | DR | sugar binding                                                                                                                                                                                                                |
| N | C4YKB8 | CC | Involved in the control of energetic metabolism and significantly contribute to cell fitness, especially under respiratory growth conditions (By similarity).                                                                |
| N | C4YKB8 | DE | Respiratory growth induced protein 1;                                                                                                                                                                                        |
| N | C4ZEV1 | CC | May play a role in 30S ribosomal subunit biogenesis                                                                                                                                                                          |
| N | C4ZEV1 | CC | Unusual circularly permuted GTPase that catalyzes rapid hydrolysis of GTP with a slow catalytic turnover (By similarity).                                                                                                    |
| N | C4ZEV1 | DE | Putative ribosome biogenesis GTPase RsgA;                                                                                                                                                                                    |
| N | C4ZEV1 | DR | GTPase activity                                                                                                                                                                                                              |
| N | C4ZEV1 | DR | metal ion binding                                                                                                                                                                                                            |
| N | C4ZQ17 | CC | Participates in the translocation of lipoproteins from the inner membrane to the outer membrane                                                                                                                              |
| N | C4ZQ17 | CC | Only forms a complex with a lipoprotein if the residue after the N-terminal Cys is not an aspartate (The Asp acts as a targeting signal to indicate that the lipoprotein should stay in the inner membrane) (By similarity). |
| N | C4ZQ17 | DE | Outer-membrane lipoprotein carrier protein;                                                                                                                                                                                  |
| N | C4ZQ17 | DR | protein transport                                                                                                                                                                                                            |
| N | C4ZQD8 | CC | May reduce aminoacrylate peracid to aminoacrylate                                                                                                                                                                            |
| N | C4ZQD8 | CC | Required to remove a toxic intermediate produce by the pyrimidine nitrogen degradation (By similarity).                                                                                                                      |
| N | C4ZQD8 | DE | Putative aminoacrylate peracid reductase RutC;                                                                                                                                                                               |
| N | C4ZQD8 | DR | oxidation-reduction process                                                                                                                                                                                                  |
| N | C4ZQD8 | DR | oxidoreductase activity                                                                                                                                                                                                      |
| N | C4ZQW9 | CC | Catalyzes the phosphorylation of D-glycero-D-manno- heptose 7-phosphate at the C-1 position to form D,D-heptose-1,7- bisphosphate (By similarity).                                                                           |
| N | C4ZQW9 | DE | Bifunctional protein hldE;                                                                                                                                                                                                   |
| N | C4ZQW9 | DE | D-beta-D-heptose 1-phosphate adenosyltransferase;                                                                                                                                                                            |
| N | C4ZQW9 | DE | D-beta-D-heptose 7-phosphate kinase;                                                                                                                                                                                         |
| N | C4ZQW9 | DE | D-beta-D-heptose 7-phosphotransferase;                                                                                                                                                                                       |
| N | C4ZQW9 | DR | biosynthetic process                                                                                                                                                                                                         |
| N | C4ZQW9 | DR | carbohydrate metabolic process                                                                                                                                                                                               |
| N | C4ZQW9 | DR | kinase activity                                                                                                                                                                                                              |
| N | C4ZQW9 | DR | nucleotidyltransferase activity                                                                                                                                                                                              |

|   |        |    |                                                                                                                                                                                                                                |
|---|--------|----|--------------------------------------------------------------------------------------------------------------------------------------------------------------------------------------------------------------------------------|
| N | C4ZQW9 | DR | phosphotransferase activity, alcohol group as acceptor                                                                                                                                                                         |
| N | C4ZT76 | DE | UPF0244 protein yjxX;                                                                                                                                                                                                          |
| N | C4ZX91 | CC | Cytoskeletal protein that is involved in cell-shape control through regulation of the length of the long axis (By similarity).                                                                                                 |
| N | C4ZX91 | DE | Cytoskeleton protein rodZ;                                                                                                                                                                                                     |
| N | C4ZX91 | DR | regulation of cell shape                                                                                                                                                                                                       |
| N | C4ZX91 | DR | sequence-specific DNA binding                                                                                                                                                                                                  |
| N | C4ZYC7 | CC | Multidrug efflux pump that functions probably as a Na <sup>+</sup> /drug antiporter (By similarity).                                                                                                                           |
| N | C4ZYC7 | DE | Multidrug resistance protein mdtK;                                                                                                                                                                                             |
| N | C4ZYC7 | DE | Multidrug-efflux transporter;                                                                                                                                                                                                  |
| N | C4ZYC7 | DR | antiporter activity                                                                                                                                                                                                            |
| N | C4ZYC7 | DR | drug transmembrane transporter activity                                                                                                                                                                                        |
| N | C4ZYC7 | DR | sodium ion transport                                                                                                                                                                                                           |
| N | C4ZZ60 | CC | Catalyzes the synthesis of Und-PP-GlcNAc-ManNAcA-Fuc4NAc (Lipid III), the third lipid-linked intermediate involved in ECA synthesis (By similarity).                                                                           |
| N | C4ZZ60 | DE | 4-alpha-L-fucosyltransferase;                                                                                                                                                                                                  |
| N | C4ZZ60 | DE | Fuc4NAc transferase;                                                                                                                                                                                                           |
| N | C4ZZ60 | DE | TDP-Fuc4NAc:lipid II Fuc4NAc transferase;                                                                                                                                                                                      |
| N | C4ZZ60 | DR | enterobacterial common antigen biosynthetic process                                                                                                                                                                            |
| N | C4ZZ60 | DR | fucosyltransferase activity                                                                                                                                                                                                    |
| N | C4ZZI8 | CC | Not exactly known; may be a structural element that influences the osmotic activation of proP at a post-translational level (By similarity).                                                                                   |
| N | C4ZZI8 | DE | ProP effector;                                                                                                                                                                                                                 |
| N | C4ZZP9 | CC | Responsible for synthesis of pseudouridine from uracil- 13 in transfer RNAs (By similarity).                                                                                                                                   |
| N | C4ZZP9 | DE | tRNA pseudouridine synthase D;                                                                                                                                                                                                 |
| N | C4ZZP9 | DE | tRNA pseudouridylylate synthase D;                                                                                                                                                                                             |
| N | C4ZZP9 | DE | tRNA-uridine isomerase D;                                                                                                                                                                                                      |
| N | C4ZZP9 | DR | pseudouridine synthase activity                                                                                                                                                                                                |
| N | C4ZZP9 | DR | pseudouridine synthesis                                                                                                                                                                                                        |
| N | C4ZZP9 | DR | tRNA processing                                                                                                                                                                                                                |
| N | C4ZZU8 | CC | Interacts with the secY protein in vivo                                                                                                                                                                                        |
| N | C4ZZU8 | CC | May bind preferentially to an uncomplexed state of secY, thus functioning either as a chelating agent for excess secY in the cell or as a regulatory factor that negatively controls the translocase function (By similarity). |
| N | C4ZZU8 | DE | Protein syd;                                                                                                                                                                                                                   |
| N | C4ZZW1 | CC | Catalyzes the 2'-O-methylation at nucleotide C2476 in 23S rRNA (By similarity).                                                                                                                                                |
| N | C4ZZW1 | DE | 23S rRNA 2'-O-ribose methyltransferase rlmM;                                                                                                                                                                                   |
| N | C4ZZW1 | DE | Ribosomal RNA large subunit methyltransferase M;                                                                                                                                                                               |
| N | C4ZZW1 | DR | methyltransferase activity                                                                                                                                                                                                     |
| N | C4ZZW1 | DR | nucleic acid binding                                                                                                                                                                                                           |
| N | C4ZZW1 | DR | rRNA processing                                                                                                                                                                                                                |
| N | C5A033 | CC | Necessary for normal cell division and for the maintenance of normal septation (By similarity).                                                                                                                                |
| N | C5A033 | DE | Probable GTP-binding protein EngB;                                                                                                                                                                                             |
| N | C5A033 | DR | barrier septum formation                                                                                                                                                                                                       |
| N | C5A134 | DE | Glycerol-3-phosphate acyltransferase;                                                                                                                                                                                          |
| N | C5A134 | DR | glycerol-3-phosphate O-acyltransferase activity                                                                                                                                                                                |
| N | C5A134 | DR | phospholipid biosynthetic process                                                                                                                                                                                              |
| N | C5A337 | CC | Produces ATP from ADP in the presence of a proton gradient across the membrane.                                                                                                                                                |
| N | C5A337 | CC | The archaeal beta chain is a regulatory subunit (By similarity).                                                                                                                                                               |
| N | C5A337 | DE | V-ATPase subunit B;                                                                                                                                                                                                            |
| N | C5A337 | DE | V-type ATP synthase beta chain;                                                                                                                                                                                                |
| N | C5A337 | DR | ATP hydrolysis coupled proton transport                                                                                                                                                                                        |
| N | C5A337 | DR | ATP synthesis coupled proton transport                                                                                                                                                                                         |
| N | C5A337 | DR | hydrogen ion transporting ATP synthase activity, rotational mechanism                                                                                                                                                          |
| N | C5A337 | DR | proton-transporting ATPase activity, rotational mechanism                                                                                                                                                                      |
| N | C5A7H4 | DE | 50S ribosomal protein L39e;                                                                                                                                                                                                    |
| N | C5A7H4 | DR | structural constituent of ribosome                                                                                                                                                                                             |
| N | C5B7L8 | CC | Participates actively in the response to hyperosmotic and heat shock by preventing the aggregation of stress-denatured proteins and by disaggregating proteins, also in an autonomous, dnaK-independent fashion                |
| N | C5B7L8 | CC | Also involved, together with dnaK and grpE, in the DNA replication of plasmids through activation of initiation proteins (By similarity).                                                                                      |



|   |        |    |                                                                                                                                                                                                                                          |
|---|--------|----|------------------------------------------------------------------------------------------------------------------------------------------------------------------------------------------------------------------------------------------|
| N | C5B7L8 | CC | GrpE releases ADP from dnaK; ATP binding to dnaK triggers the release of the substrate protein, thus completing the reaction cycle                                                                                                       |
| N | C5B7L8 | CC | Several rounds of ATP-dependent interactions between dnaJ, dnaK and grpE are required for fully efficient folding                                                                                                                        |
| N | C5B7L8 | CC | Unfolded proteins bind initially to dnaJ; upon interaction with the dnaJ-bound protein, dnaK hydrolyzes its bound ATP, resulting in the formation of a stable complex                                                                    |
| N | C5B7L8 | DE | Chaperone protein dnaJ;                                                                                                                                                                                                                  |
| N | C5B7L8 | DR | DNA replication                                                                                                                                                                                                                          |
| N | C5B7L8 | DR | heat shock protein binding                                                                                                                                                                                                               |
| N | C5B7L8 | DR | metal ion binding                                                                                                                                                                                                                        |
| N | C5B7L8 | DR | protein folding                                                                                                                                                                                                                          |
| N | C5B7L8 | DR | response to heat                                                                                                                                                                                                                         |
| N | C5B7L8 | DR | unfolded protein binding                                                                                                                                                                                                                 |
| N | C5B995 | DE | Glycine--tRNA ligase beta subunit;                                                                                                                                                                                                       |
| N | C5B995 | DE | Glycyl-tRNA synthetase beta subunit;                                                                                                                                                                                                     |
| N | C5B995 | DR | arginine-tRNA ligase activity                                                                                                                                                                                                            |
| N | C5B995 | DR | arginyl-tRNA aminoacylation                                                                                                                                                                                                              |
| N | C5B995 | DR | glycine-tRNA ligase activity                                                                                                                                                                                                             |
| N | C5B995 | DR | glycyl-tRNA aminoacylation                                                                                                                                                                                                               |
| N | C5BHE2 | DE | 50S ribosomal protein L10;                                                                                                                                                                                                               |
| N | C5BHE2 | DR | ribosome biogenesis                                                                                                                                                                                                                      |
| N | C5BHE2 | DR | structural constituent of ribosome                                                                                                                                                                                                       |
| N | C5BPP4 | DE | Aspartate--tRNA ligase;                                                                                                                                                                                                                  |
| N | C5BPP4 | DE | Aspartyl-tRNA synthetase;                                                                                                                                                                                                                |
| N | C5BPP4 | DR | aspartate-tRNA ligase activity                                                                                                                                                                                                           |
| N | C5BPP4 | DR | aspartyl-tRNA aminoacylation                                                                                                                                                                                                             |
| N | C5BPP4 | DR | nucleic acid binding                                                                                                                                                                                                                     |
| N | C5BQ00 | CC | Catalyzes the conversion of glucosamine-6-phosphate to glucosamine-1-phosphate (By similarity).                                                                                                                                          |
| N | C5BQ00 | DE | Phosphoglucosamine mutase;                                                                                                                                                                                                               |
| N | C5BQ00 | DR | carbohydrate metabolic process                                                                                                                                                                                                           |
| N | C5BQ00 | DR | magnesium ion binding                                                                                                                                                                                                                    |
| N | C5BQ00 | DR | phosphoglucosamine mutase activity                                                                                                                                                                                                       |
| N | C5BQX3 | CC | This protein specifically catalyzes the removal of signal peptides from prolipoproteins (By similarity).                                                                                                                                 |
| N | C5BQX3 | DE | Lipoprotein signal peptidase;                                                                                                                                                                                                            |
| N | C5BQX3 | DE | Prolipoprotein signal peptidase;                                                                                                                                                                                                         |
| N | C5BQX3 | DE | Signal peptidase II;                                                                                                                                                                                                                     |
| N | C5BQX3 | DR | aspartic-type endopeptidase activity                                                                                                                                                                                                     |
| N | C5C9Q7 | CC | Responsible for the release of ribosomes from messenger RNA at the termination of protein biosynthesis                                                                                                                                   |
| N | C5C9Q7 | CC | May increase the efficiency of translation by recycling ribosomes from one round of translation to another (By similarity).                                                                                                              |
| N | C5C9Q7 | DE | Ribosome-recycling factor;                                                                                                                                                                                                               |
| N | C5C9Q7 | DE | Ribosome-releasing factor;                                                                                                                                                                                                               |
| N | C5CBV4 | CC | Required for correct localization of precursor proteins bearing signal peptides with the twin arginine conserved motif S/T-R-R-X-F-L-K                                                                                                   |
| N | C5CBV4 | CC | This sec-independent pathway is termed TAT for twin-arginine translocation system                                                                                                                                                        |
| N | C5CBV4 | CC | This system mainly transports proteins with bound cofactors that require folding prior to export (By similarity).                                                                                                                        |
| N | C5CBV4 | DE | Sec-independent protein translocase protein tatA/E homolog;                                                                                                                                                                              |
| N | C5CBV4 | DR | protein secretion                                                                                                                                                                                                                        |
| N | C5CBV4 | DR | protein transporter activity                                                                                                                                                                                                             |
| N | C5CBV4 | DR | transmembrane transport                                                                                                                                                                                                                  |
| N | C5CF28 | CC | This protein is involved in the repair of mismatches in DNA                                                                                                                                                                              |
| N | C5CF28 | CC | It is required for dam-dependent methyl-directed DNA mismatch repair                                                                                                                                                                     |
| N | C5CF28 | CC | May act as a "molecular matchmaker", a protein that promotes the formation of a stable complex between two or more DNA-binding proteins in an ATP-dependent manner without itself being part of a final effector complex (By similarity) |
| N | C5CF28 | DE | DNA mismatch repair protein mutL;                                                                                                                                                                                                        |
| N | C5CF28 | DR | mismatch repair                                                                                                                                                                                                                          |
| N | C5CF28 | DR | mismatched DNA binding                                                                                                                                                                                                                   |
| N | C5CSH5 | CC | Catalyzes the isomerization between 2-isopropylmalate and 3-isopropylmalate, via the formation of 2-isopropylmaleate (By similarity).                                                                                                    |
| N | C5CSH5 | DE | 3-isopropylmalate dehydratase large subunit;                                                                                                                                                                                             |

|   |        |    |                                                                                                                                                                                      |
|---|--------|----|--------------------------------------------------------------------------------------------------------------------------------------------------------------------------------------|
| N | C5CSH5 | DE | Alpha-IPM isomerase;                                                                                                                                                                 |
| N | C5CSH5 | DE | Isopropylmalate isomerase;                                                                                                                                                           |
| N | C5CSH5 | DR | 3-isopropylmalate dehydratase activity                                                                                                                                               |
| N | C5CSH5 | DR | 4 iron, 4 sulfur cluster binding                                                                                                                                                     |
| N | C5CSH5 | DR | leucine biosynthetic process                                                                                                                                                         |
| N | C5CSH5 | DR | metal ion binding                                                                                                                                                                    |
| N | C5D3R7 | CC | One of the primary rRNA binding proteins, it binds directly near the 3'-end of the 23S rRNA, where it nucleates assembly of the 50S subunit (By similarity).                         |
| N | C5D3R7 | DE | 50S ribosomal protein L3;                                                                                                                                                            |
| N | C5D3R7 | DR | structural constituent of ribosome                                                                                                                                                   |
| N | C5D3Y4 | CC | Catalyzes the dephosphorylation of undecaprenyl diphosphate (UPP)                                                                                                                    |
| N | C5D3Y4 | CC | Confers resistance to bacitracin (By similarity).                                                                                                                                    |
| N | C5D3Y4 | DE | Bacitracin resistance protein;                                                                                                                                                       |
| N | C5D3Y4 | DE | Undecaprenyl pyrophosphate phosphatase;                                                                                                                                              |
| N | C5D3Y4 | DE | Undecaprenyl-diphosphatase;                                                                                                                                                          |
| N | C5D3Y4 | DR | cellular cell wall organization                                                                                                                                                      |
| N | C5D3Y4 | DR | dephosphorylation                                                                                                                                                                    |
| N | C5D3Y4 | DR | peptidoglycan biosynthetic process                                                                                                                                                   |
| N | C5D3Y4 | DR | regulation of cell shape                                                                                                                                                             |
| N | C5D3Y4 | DR | response to antibiotic                                                                                                                                                               |
| N | C5D3Y4 | DR | undecaprenyl-diphosphatase activity                                                                                                                                                  |
| N | C5D428 | CC | Zinc phosphodiesterase, which displays some tRNA 3'-processing endonuclease activity.                                                                                                |
| N | C5D428 | CC | Probably involved in tRNA maturation, by removing a 3'-trailer from precursor tRNA (By similarity).                                                                                  |
| N | C5D428 | DE | Ribonuclease Z;                                                                                                                                                                      |
| N | C5D428 | DE | tRNA 3' endonuclease;                                                                                                                                                                |
| N | C5D428 | DR | endoribonuclease activity, producing 5'-phosphomonoesters                                                                                                                            |
| N | C5D428 | DR | metal ion binding                                                                                                                                                                    |
| N | C5D428 | DR | tRNA 3'-trailer cleavage                                                                                                                                                             |
| N | C5D8M2 | CC | Cell wall formation                                                                                                                                                                  |
| N | C5D8M2 | CC | Catalyzes the addition of glutamate to the nucleotide precursor UDP-N-acetylmuramoyl-L-alanine (UMA) (By similarity).                                                                |
| N | C5D8M2 | DE | D-glutamic acid-adding enzyme;                                                                                                                                                       |
| N | C5D8M2 | DE | UDP-N-acetylmuramoyl-L-alanyl-D-glutamate synthetase;                                                                                                                                |
| N | C5D8M2 | DE | UDP-N-acetylmuramoylalanine--D-glutamate ligase;                                                                                                                                     |
| N | C5D8M2 | DR | UDP-N-acetylmuramoylalanine-D-glutamate ligase activity                                                                                                                              |
| N | C5D8M2 | DR | cell division                                                                                                                                                                        |
| N | C5D8M2 | DR | cellular cell wall organization                                                                                                                                                      |
| N | C5D8M2 | DR | peptidoglycan biosynthetic process                                                                                                                                                   |
| N | C5D8M2 | DR | regulation of cell shape                                                                                                                                                             |
| N | C5FRS7 | CC | Component of the 90S pre-ribosome involved in the maturation of rRNAs                                                                                                                |
| N | C5FRS7 | CC | Required for early cleavages of the pre-RNAs in the 40S ribosomal subunit maturation pathway (By similarity).                                                                        |
| N | C5FRS7 | DE | Ribosomal RNA-processing protein 36;                                                                                                                                                 |
| N | C5FRS7 | DE | rRNA biogenesis protein RRP36;                                                                                                                                                       |
| N | C5FRS7 | DR | rRNA processing                                                                                                                                                                      |
| N | C5Y494 | DE | UPF0497 membrane protein Sb05g021340;                                                                                                                                                |
| N | C6A237 | DE | Phenylalanine--tRNA ligase beta chain;                                                                                                                                               |
| N | C6A237 | DE | Phenylalanyl-tRNA synthetase beta chain;                                                                                                                                             |
| N | C6A237 | DR | magnesium ion binding                                                                                                                                                                |
| N | C6A237 | DR | phenylalanine-tRNA ligase activity                                                                                                                                                   |
| N | C6A237 | DR | phenylalanyl-tRNA aminoacylation                                                                                                                                                     |
| N | C6BXD5 | DE | UPF0234 protein Desal_2385;                                                                                                                                                          |
| N | C6BYQ6 | CC | Binds the 23S rRNA (By similarity).                                                                                                                                                  |
| N | C6BYQ6 | DE | 50S ribosomal protein L31;                                                                                                                                                           |
| N | C6BYQ6 | DR | metal ion binding                                                                                                                                                                    |
| N | C6BYQ6 | DR | structural constituent of ribosome                                                                                                                                                   |
| N | C6C0I6 | DE | 5-enolpyruvylshikimate-3-phosphate phospholyase;                                                                                                                                     |
| N | C6C0I6 | DE | Chorismate synthase;                                                                                                                                                                 |
| N | C6C0I6 | DR | aromatic amino acid family biosynthetic process                                                                                                                                      |
| N | C6C0I6 | DR | chorismate synthase activity                                                                                                                                                         |
| N | C6D9B8 | CC | Functions in complex with FlhC as a master transcriptional regulator that regulates transcription of several flagellar and non-flagellar operons by binding to their promoter region |

|   |        |    |                                                                                                                                                                                                                               |
|---|--------|----|-------------------------------------------------------------------------------------------------------------------------------------------------------------------------------------------------------------------------------|
| N | C6D9B8 | CC | Activates expression of class 2 flagellar genes, including fliA, which is a flagellum-specific sigma factor that turns on the class 3 genes                                                                                   |
| N | C6D9B8 | CC | Also regulates genes whose products function in a variety of physiological pathways (By similarity).                                                                                                                          |
| N | C6D9B8 | DE | Flagellar transcriptional regulator FlhD;                                                                                                                                                                                     |
| N | C6D9B8 | DR | flagellum assembly                                                                                                                                                                                                            |
| N | C6D9B8 | DR | transcription activator activity                                                                                                                                                                                              |
| N | C6D9J8 | CC | Participates actively in the response to hyperosmotic and heat shock by preventing the aggregation of stress-denatured proteins, in association with dnaK and grpE                                                            |
| N | C6D9J8 | CC | GrpE releases ADP from dnaK; ATP binding to dnaK triggers the release of the substrate protein, thus completing the reaction cycle                                                                                            |
| N | C6D9J8 | CC | It is the nucleotide exchange factor for dnaK and may function as a thermosensor                                                                                                                                              |
| N | C6D9J8 | CC | Several rounds of ATP- dependent interactions between dnaJ, dnaK and grpE are required for fully efficient folding (By similarity).                                                                                           |
| N | C6D9J8 | CC | Unfolded proteins bind initially to dnaJ; upon interaction with the dnaJ-bound protein, dnaK hydrolyzes its bound ATP, resulting in the formation of a stable complex                                                         |
| N | C6D9J8 | DE | HSP-70 cofactor;                                                                                                                                                                                                              |
| N | C6D9J8 | DE | Protein grpE;                                                                                                                                                                                                                 |
| N | C6D9J8 | DR | adenyl-nucleotide exchange factor activity                                                                                                                                                                                    |
| N | C6D9J8 | DR | chaperone binding                                                                                                                                                                                                             |
| N | C6D9J8 | DR | protein folding                                                                                                                                                                                                               |
| N | C6D9J8 | DR | protein homodimerization activity                                                                                                                                                                                             |
| N | C6D9J8 | DR | response to stress                                                                                                                                                                                                            |
| N | C6DEU3 | CC | Cell wall formation                                                                                                                                                                                                           |
| N | C6DEU3 | CC | Catalyzes the transfer of a GlcNAc subunit on undecaprenyl-pyrophosphoryl-MurNAc-pentapeptide (lipid intermediate I) to form undecaprenyl-pyrophosphoryl-MurNAc- (pentapeptide)GlcNAc (lipid intermediate II) (By similarity) |
| N | C6DEU3 | DE | UDP-N-acetylglucosamine--N-acetylmuramyl-(pentapeptide) pyrophosphoryl-undecaprenol N-acetylglucosamine transferase;                                                                                                          |
| N | C6DEU3 | DE | Undecaprenyl-PP-MurNAc-pentapeptide-UDPGlcNAc GlcNAc transferase;                                                                                                                                                             |
| N | C6DEU3 | DR | UDP-N-acetyl-D-glucosamine:N-acetylmuramoyl-L-alanyl-D-glutamyl-meso-2,6-diaminopimelyl-D-alanyl-D-alanine-diphosphoundecaprenol 4-beta-N-acetylglucosaminyltransferase activity                                              |
| N | C6DEU3 | DR | UDP-N-acetylgalactosamine biosynthetic process                                                                                                                                                                                |
| N | C6DEU3 | DR | carbohydrate binding                                                                                                                                                                                                          |
| N | C6DEU3 | DR | cell division                                                                                                                                                                                                                 |
| N | C6DEU3 | DR | cellular cell wall organization                                                                                                                                                                                               |
| N | C6DEU3 | DR | lipid glycosylation                                                                                                                                                                                                           |
| N | C6DEU3 | DR | peptidoglycan biosynthetic process                                                                                                                                                                                            |
| N | C6DEU3 | DR | regulation of cell shape                                                                                                                                                                                                      |
| N | C6DEU3 | DR | undecaprenyldiphospho-muramoylpentapeptide beta-N-acetylglucosaminyltransferase activity                                                                                                                                      |
| N | C6DF77 | CC | Catalyzes the condensation of ATP and 5-phosphoribose 1- diphosphate to form N <sup>5</sup> -(5'-phosphoribosyl)-ATP (PR-ATP)                                                                                                 |
| N | C6DF77 | CC | has a crucial role in the pathway because the rate of nucleotide biosynthesis seems to be controlled primarily by regulation of hisG enzymatic activity (By similarity)                                                       |
| N | C6DF77 | DE | ATP phosphoribosyltransferase;                                                                                                                                                                                                |
| N | C6DF77 | DE | ATP-PRTase;                                                                                                                                                                                                                   |
| N | C6DF77 | DR | ATP phosphoribosyltransferase activity                                                                                                                                                                                        |
| N | C6DF77 | DR | histidine biosynthetic process                                                                                                                                                                                                |
| N | C6DF77 | DR | magnesium ion binding                                                                                                                                                                                                         |
| N | C6DFE1 | CC | Involved in copper homeostasis (By similarity).                                                                                                                                                                               |
| N | C6DFE1 | DE | Copper homeostasis protein CutC;                                                                                                                                                                                              |
| N | C6DFE1 | DR | copper ion binding                                                                                                                                                                                                            |
| N | C6DFE1 | DR | copper ion homeostasis                                                                                                                                                                                                        |
| N | C6DFP4 | DE | Glucose-6-phosphate isomerase;                                                                                                                                                                                                |
| N | C6DFP4 | DE | Phosphoglucose isomerase;                                                                                                                                                                                                     |
| N | C6DFP4 | DE | Phosphohexose isomerase;                                                                                                                                                                                                      |
| N | C6DFP4 | DR | gluconeogenesis                                                                                                                                                                                                               |
| N | C6DFP4 | DR | glucose-6-phosphate isomerase activity                                                                                                                                                                                        |
| N | C6DG62 | CC | This is 1 of the proteins that binds and probably mediates the attachment of the 5S rRNA into the large ribosomal subunit, where it forms part of the central protuberance                                                    |
| N | C6DG62 | CC | Contacts the P site tRNA; the 5S rRNA and some of its associated proteins might help stabilize positioning of ribosome-bound tRNAs (By similarity).                                                                           |

|   |        |    |                                                                                                                                                                                                                                                   |
|---|--------|----|---------------------------------------------------------------------------------------------------------------------------------------------------------------------------------------------------------------------------------------------------|
| N | C6DG62 | CC | In the 70S ribosome it contacts protein S13 of the 30S subunit (bridge B1b), connecting the 2 subunits; this bridge is implicated in subunit movement                                                                                             |
| N | C6DG62 | DE | 50S ribosomal protein L5;                                                                                                                                                                                                                         |
| N | C6DG62 | DR | structural constituent of ribosome                                                                                                                                                                                                                |
| N | C6DJF3 | CC | Catalyzes the interconversion of beta-pyran and beta- furan forms of D-ribose (By similarity).                                                                                                                                                    |
| N | C6DJF3 | DE | D-ribose pyranase;                                                                                                                                                                                                                                |
| N | C6DJF3 | DR | carbohydrate metabolic process                                                                                                                                                                                                                    |
| N | C6DJF3 | DR | carbohydrate transport                                                                                                                                                                                                                            |
| N | C6DJF3 | DR | intramolecular lyase activity                                                                                                                                                                                                                     |
| N | C6E4Q4 | CC | One of the primary rRNA binding proteins                                                                                                                                                                                                          |
| N | C6E4Q4 | CC | It has been suggested to have peptidyltransferase activity, this is somewhat controversial                                                                                                                                                        |
| N | C6E4Q4 | CC | Makes several contacts with the 16S rRNA in the 70S ribosome (By similarity).                                                                                                                                                                     |
| N | C6E4Q4 | CC | Required for association of the 30S and 50S subunits to form the 70S ribosome, for tRNA binding and peptide bond formation                                                                                                                        |
| N | C6E4Q4 | DE | 50S ribosomal protein L2;                                                                                                                                                                                                                         |
| N | C6E4Q4 | DR | structural constituent of ribosome                                                                                                                                                                                                                |
| N | C6E4Q4 | DR | transferase activity                                                                                                                                                                                                                              |
| N | C6E506 | CC | Binds to the 23S rRNA (By similarity).                                                                                                                                                                                                            |
| N | C6E506 | DE | 50S ribosomal protein L9;                                                                                                                                                                                                                         |
| N | C6E506 | DR | structural constituent of ribosome                                                                                                                                                                                                                |
| N | C6E5S6 | DE | Shikimate dehydrogenase;                                                                                                                                                                                                                          |
| N | C6E5S6 | DR | aromatic amino acid family biosynthetic process                                                                                                                                                                                                   |
| N | C6E5S6 | DR | oxidation-reduction process                                                                                                                                                                                                                       |
| N | C6E5S6 | DR | shikimate 5-dehydrogenase activity                                                                                                                                                                                                                |
| N | C7DQX8 | DE | Conotoxin Vi11.3;                                                                                                                                                                                                                                 |
| N | C8CK75 | DE | Conotoxin M115b;                                                                                                                                                                                                                                  |
| N | C8CK75 | DR | ion channel inhibitor activity                                                                                                                                                                                                                    |
| N | D0ZHC6 | CC | Efflux pump driven by the proton motive force                                                                                                                                                                                                     |
| N | D0ZHC6 | CC | Confers resistance to a broad spectrum of chemically unrelated drugs (By similarity)                                                                                                                                                              |
| N | D0ZHC6 | DE | Multidrug transporter MdfA;                                                                                                                                                                                                                       |
| N | D0ZHC6 | DR | response to antibiotic                                                                                                                                                                                                                            |
| N | D0ZHC6 | DR | transmembrane transport                                                                                                                                                                                                                           |
| N | D0ZHC6 | DR | transporter activity                                                                                                                                                                                                                              |
| N | D2HWN6 | CC | Transcription factor required to direct islet cell differentiation during endocrine pancreas development                                                                                                                                          |
| N | D2HWN6 | CC | Activates transcription by forming a heterodimer with RFX3 and binding to the X-box in the promoter of target genes (By similarity).                                                                                                              |
| N | D2HWN6 | CC | Acts downstream of NEUROG3 and regulates the transcription factors involved in beta-cell maturation and function, thereby restricting the expression of the beta-cell differentiation and specification genes, and thus the beta-cell fate choice |
| N | D2HWN6 | CC | Not required for pancreatic PP (polypeptide-producing) cells differentiation                                                                                                                                                                      |
| N | D2HWN6 | CC | Specifically required for the differentiation of 4 of the 5 islet cell types and for the production of insulin                                                                                                                                    |
| N | D2HWN6 | DE | DNA-binding protein RFX6;                                                                                                                                                                                                                         |
| N | D2HWN6 | DE | Regulatory factor X 6;                                                                                                                                                                                                                            |
| N | D2HWN6 | DR | glucose homeostasis                                                                                                                                                                                                                               |
| N | D2HWN6 | DR | pancreatic A cell differentiation                                                                                                                                                                                                                 |
| N | D2HWN6 | DR | pancreatic D cell differentiation                                                                                                                                                                                                                 |
| N | D2HWN6 | DR | pancreatic E cell differentiation                                                                                                                                                                                                                 |
| N | D2HWN6 | DR | promoter binding                                                                                                                                                                                                                                  |
| N | D2HWN6 | DR | regulation of insulin secretion                                                                                                                                                                                                                   |
| N | D2HWN6 | DR | regulation of transcription, DNA-dependent                                                                                                                                                                                                        |
| N | D2HWN6 | DR | transcription activator activity                                                                                                                                                                                                                  |
| N | D2HWN6 | DR | type B pancreatic cell differentiation                                                                                                                                                                                                            |
| N | D2HQI1 | CC | Embryonic stem (ES) cell-specific transcription factor required to regulate ES cell pluripotency                                                                                                                                                  |
| N | D2HQI1 | CC | Acts as an activator of spontaneous telomere sister chromatid exchange (T-SCE) and telomere elongation in undifferentiated ES cells (By similarity).                                                                                              |
| N | D2HQI1 | CC | Binds telomeres and plays a key role in genomic stability in ES cells by regulating telomere elongation                                                                                                                                           |
| N | D2HQI1 | DE | Zinc finger and SCAN domain-containing protein 4;                                                                                                                                                                                                 |
| N | D2HQI1 | DR | regulation of transcription, DNA-dependent                                                                                                                                                                                                        |
| N | D2HQI1 | DR | sequence-specific DNA binding transcription factor activity                                                                                                                                                                                       |
| N | D2HQI1 | DR | telomere maintenance via telomere lengthening                                                                                                                                                                                                     |

|   |        |    |                                                                                                                                                                 |
|---|--------|----|-----------------------------------------------------------------------------------------------------------------------------------------------------------------|
| N | D2HQI1 | DR | viral reproduction                                                                                                                                              |
| N | D2HQI1 | DR | zinc ion binding                                                                                                                                                |
| N | D2HZB0 | CC | Key regulator of mitochondrial calcium uptake required for calcium entry into mitochondrion                                                                     |
| N | D2HZB0 | CC | May act as a calcium sensor via its EF-hand domains, gating the activity of a calcium channel partner (By similarity).                                          |
| N | D2HZB0 | DE | Calcium uptake protein 1, mitochondrial;                                                                                                                        |
| N | D2HZB0 | DE | Calcium-binding atopy-related autoantigen 1 homolog;                                                                                                            |
| N | D2HZB0 | DR | calcium ion binding                                                                                                                                             |
| N | D2HZB0 | DR | calcium ion import                                                                                                                                              |
| N | D2HZB0 | DR | elevation of mitochondrial calcium ion concentration                                                                                                            |
| N | D2Y240 | CC | Ion channel inhibitor (By similarity).                                                                                                                          |
| N | D2Y240 | DE | Hainantoxin-VIII;                                                                                                                                               |
| N | D2Y240 | DE | Peptide F4-27.90;                                                                                                                                               |
| N | D2Y240 | DR | potassium channel inhibitor activity                                                                                                                            |
| N | D2Y261 | CC | Probable ion channel inhibitor (By similarity).                                                                                                                 |
| N | D2Y261 | DE | HNTX-XVI.9;                                                                                                                                                     |
| N | D2Y261 | DE | Hainantoxin-XVI.9;                                                                                                                                              |
| N | D2Y261 | DE | Peptide F4-19.87;                                                                                                                                               |
| N | D2Y261 | DR | sodium channel inhibitor activity                                                                                                                               |
| N | D2Y290 | CC | Probable ion channel inhibitor (By similarity).                                                                                                                 |
| N | D2Y290 | DE | HNTX-XVI-20;                                                                                                                                                    |
| N | D2Y290 | DE | Hainantoxin-XVI-20;                                                                                                                                             |
| N | D2Y290 | DR | sodium channel inhibitor activity                                                                                                                               |
| N | D2Y2C8 | CC | Putative ion channel inhibitor.                                                                                                                                 |
| N | D2Y2C8 | DE | HNTX-XVII.3;                                                                                                                                                    |
| N | D2Y2C8 | DE | Hainantoxin-XVII.3;                                                                                                                                             |
| N | D2Y2C8 | DE | Peptide F2-20.97;                                                                                                                                               |
| N | D2Y2C8 | DR | ion channel inhibitor activity                                                                                                                                  |
| N | D2Y2G1 | CC | Inhibits trypsin and blocks voltage-gated potassium channels (By similarity).                                                                                   |
| N | D2Y2G1 | DE | HNTX-XI-10;                                                                                                                                                     |
| N | D2Y2G1 | DE | Hainantoxin-XI-10;                                                                                                                                              |
| N | D2Y2G1 | DR | potassium channel inhibitor activity                                                                                                                            |
| N | D2Y2G1 | DR | serine-type endopeptidase inhibitor activity                                                                                                                    |
| N | D3ZAP3 | DE | Uncharacterized protein KIAA1383 homolog;                                                                                                                       |
| N | D4CZ44 | CC | Secreted metalloproteinase probably acting as a virulence factor (By similarity).                                                                               |
| N | D4CZ44 | DE | Fungalysin MEP4;                                                                                                                                                |
| N | D4CZ44 | DE | Probable extracellular metalloproteinase 4;                                                                                                                     |
| N | D4CZ44 | DR | metalloendopeptidase activity                                                                                                                                   |
| N | D4CZ44 | DR | zinc ion binding                                                                                                                                                |
| N | D5CE34 | CC | May reduce aminoacrylate peracid to aminoacrylate                                                                                                               |
| N | D5CE34 | CC | Required to remove a toxic intermediate produce by the pyrimidine nitrogen degradation (By similarity).                                                         |
| N | D5CE34 | DE | Putative aminoacrylate peracid reductase RutC;                                                                                                                  |
| N | D5CE34 | DR | oxidation-reduction process                                                                                                                                     |
| N | D5CE34 | DR | oxidoreductase activity                                                                                                                                         |
| N | D5CZH0 | CC | May reduce aminoacrylate peracid to aminoacrylate                                                                                                               |
| N | D5CZH0 | CC | Required to remove a toxic intermediate produce by the pyrimidine nitrogen degradation (By similarity).                                                         |
| N | D5CZH0 | DE | Putative aminoacrylate peracid reductase RutC;                                                                                                                  |
| N | D5CZH0 | DR | oxidation-reduction process                                                                                                                                     |
| N | D5CZH0 | DR | oxidoreductase activity                                                                                                                                         |
| N | E0TZF9 | CC | One of two assembly initiator proteins, it binds directly to the 5'-end of the 23S rRNA, where it nucleates assembly of the 50S subunit (By similarity).        |
| N | E0TZF9 | DE | 50S ribosomal protein L24;                                                                                                                                      |
| N | E0TZF9 | DR | structural constituent of ribosome                                                                                                                              |
| N | E1C2Z0 | CC | Component of the MMS22L-TONSIL complex, a complex that stimulates the recombination-dependent repair of stalled or collapsed replication forks (By similarity). |
| N | E1C2Z0 | DE | Methyl methanesulfonate-sensitivity protein 22-like;                                                                                                            |
| N | E1C2Z0 | DE | Protein MMS22-like;                                                                                                                                             |
| N | E1C2Z0 | DR | double-strand break repair via homologous recombination                                                                                                         |
| N | E1C2Z0 | DR | replication fork processing                                                                                                                                     |
| N | O00116 | DE | Aging-associated gene 5 protein;                                                                                                                                |
| N | O00116 | DE | Alkyl-DHAP synthase;                                                                                                                                            |
| N | O00116 | DE | Alkyldihydroxyacetonephosphate synthase, peroxisomal;                                                                                                           |

|   |        |    |                                                                                                                                                                                                          |
|---|--------|----|----------------------------------------------------------------------------------------------------------------------------------------------------------------------------------------------------------|
| N | O00116 | DE | Alkylglycerone-phosphate synthase;                                                                                                                                                                       |
| N | O00116 | DR | alkylglycerone-phosphate synthase activity                                                                                                                                                               |
| N | O00116 | DR | ether lipid biosynthetic process                                                                                                                                                                         |
| N | O00116 | DR | flavin adenine dinucleotide binding                                                                                                                                                                      |
| N | O00116 | DR | oxidoreductase activity                                                                                                                                                                                  |
| N | O00311 | CC | Seems to phosphorylate critical substrates that regulate the G1/S phase transition and/or DNA replication                                                                                                |
| N | O00311 | CC | Can phosphorylates MCM2 and MCM3.                                                                                                                                                                        |
| N | O00311 | DE | CDC7-related kinase;                                                                                                                                                                                     |
| N | O00311 | DE | Cell division cycle 7-related protein kinase;                                                                                                                                                            |
| N | O00311 | DR | DNA replication                                                                                                                                                                                          |
| N | O00311 | DR | G1/S transition of mitotic cell cycle                                                                                                                                                                    |
| N | O00311 | DR | M/G1 transition of mitotic cell cycle                                                                                                                                                                    |
| N | O00311 | DR | cell cycle checkpoint                                                                                                                                                                                    |
| N | O00311 | DR | cell division                                                                                                                                                                                            |
| N | O00311 | DR | metal ion binding                                                                                                                                                                                        |
| N | O00311 | DR | positive regulation of cell proliferation                                                                                                                                                                |
| N | O00311 | DR | protein binding                                                                                                                                                                                          |
| N | O00311 | DR | protein phosphorylation                                                                                                                                                                                  |
| N | O00311 | DR | protein serine/threonine kinase activity                                                                                                                                                                 |
| N | O00311 | DR | regulation of S phase                                                                                                                                                                                    |
| N | O00526 | CC | Component of the asymmetric unit membrane (AUM); a highly specialized biomembrane elaborated by terminally differentiated urothelial cells                                                               |
| N | O00526 | CC | may play an important role in regulating the assembly of the AUM (By similarity)                                                                                                                         |
| N | O00526 | DE | Uroplakin II;                                                                                                                                                                                            |
| N | O00526 | DE | Uroplakin-2;                                                                                                                                                                                             |
| N | O00526 | DR | cellular membrane organization                                                                                                                                                                           |
| N | O00526 | DR | epithelial cell differentiation                                                                                                                                                                          |
| N | O00526 | DR | multicellular organismal development                                                                                                                                                                     |
| N | O00852 | DE | Phosphoglycerate kinase;                                                                                                                                                                                 |
| N | O00852 | DR | phosphoglycerate kinase activity                                                                                                                                                                         |
| N | O02161 | CC | Essential component of the PAM complex, a complex required for the translocation of transit peptide-containing proteins from the inner membrane into the mitochondrial matrix in an ATP-dependent manner |
| N | O02161 | CC | Recruits mitochondrial HSP70 to drive protein translocation into the matrix using ATP as an energy source (By similarity).                                                                               |
| N | O02161 | DE | Probable mitochondrial import inner membrane translocase subunit tim-44;                                                                                                                                 |
| N | O02161 | DR | P-P-bond-hydrolysis-driven protein transmembrane transporter activity                                                                                                                                    |
| N | O02161 | DR | embryo development ending in birth or egg hatching                                                                                                                                                       |
| N | O02161 | DR | intracellular protein transport                                                                                                                                                                          |
| N | O02161 | DR | nematode larval development                                                                                                                                                                              |
| N | O02161 | DR | positive regulation of growth rate                                                                                                                                                                       |
| N | O02161 | DR | protein binding                                                                                                                                                                                          |
| N | O02161 | DR | receptor-mediated endocytosis                                                                                                                                                                            |
| N | O02316 | CC | Orphan nuclear receptor.                                                                                                                                                                                 |
| N | O02316 | DE | Nuclear hormone receptor family member nhr-77;                                                                                                                                                           |
| N | O02316 | DR | regulation of transcription, DNA-dependent                                                                                                                                                               |
| N | O02316 | DR | sequence-specific DNA binding                                                                                                                                                                            |
| N | O02316 | DR | sequence-specific DNA binding transcription factor activity                                                                                                                                              |
| N | O02316 | DR | steroid hormone receptor activity                                                                                                                                                                        |
| N | O02316 | DR | zinc ion binding                                                                                                                                                                                         |
| N | O03064 | CC | Produces ATP from ADP in the presence of a proton gradient across the membrane.                                                                                                                          |
| N | O03064 | CC | The catalytic sites are hosted primarily by the beta subunits (By similarity).                                                                                                                           |
| N | O03064 | DE | ATP synthase F1 sector subunit beta;                                                                                                                                                                     |
| N | O03064 | DE | ATP synthase subunit beta, chloroplastic;                                                                                                                                                                |
| N | O03064 | DE | F-ATPase subunit beta;                                                                                                                                                                                   |
| N | O03064 | DR | ATP hydrolysis coupled proton transport                                                                                                                                                                  |
| N | O03064 | DR | ATP synthesis coupled proton transport                                                                                                                                                                   |
| N | O03064 | DR | hydrogen ion transporting ATP synthase activity, rotational mechanism                                                                                                                                    |
| N | O03064 | DR | hydrogen-exporting ATPase activity, phosphorylative mechanism                                                                                                                                            |
| N | O04019 | CC | The 26S protease is involved in the ATP-dependent degradation of ubiquitinated proteins.                                                                                                                 |
| N | O04019 | CC | The regulatory (or ATPase) complex confers ATP dependency and substrate specificity to the 26S complex.                                                                                                  |
| N | O04019 | DE | 26S protease regulatory subunit 6A homolog B;                                                                                                                                                            |
| N | O04019 | DE | 26S proteasome AAA-ATPase subunit RPT5b;                                                                                                                                                                 |

|   |        |    |                                                                                                                                                                                                                                                                                                                                                                                           |
|---|--------|----|-------------------------------------------------------------------------------------------------------------------------------------------------------------------------------------------------------------------------------------------------------------------------------------------------------------------------------------------------------------------------------------------|
| N | O04019 | DE | Proteasome 26S subunit 6A homolog B;                                                                                                                                                                                                                                                                                                                                                      |
| N | O04019 | DE | Regulatory particle triple-A ATPase subunit 5b;                                                                                                                                                                                                                                                                                                                                           |
| N | O04019 | DE | TBP-1 homolog B;                                                                                                                                                                                                                                                                                                                                                                          |
| N | O04019 | DE | Tat-binding protein 1 homolog B;                                                                                                                                                                                                                                                                                                                                                          |
| N | O04019 | DR | embryo sac development                                                                                                                                                                                                                                                                                                                                                                    |
| N | O04019 | DR | glucose mediated signaling pathway                                                                                                                                                                                                                                                                                                                                                        |
| N | O04019 | DR | nucleoside-triphosphatase activity                                                                                                                                                                                                                                                                                                                                                        |
| N | O04019 | DR | pollen development                                                                                                                                                                                                                                                                                                                                                                        |
| N | O04019 | DR | proteasomal protein catabolic process                                                                                                                                                                                                                                                                                                                                                     |
| N | O04019 | DR | protein binding                                                                                                                                                                                                                                                                                                                                                                           |
| N | O04486 | CC | Intracellular vesicle trafficking and protein transport (By similarity).                                                                                                                                                                                                                                                                                                                  |
| N | O04486 | DE | Ras-related protein RABA2a;                                                                                                                                                                                                                                                                                                                                                               |
| N | O04486 | DE | Ras-related protein Rab11C;                                                                                                                                                                                                                                                                                                                                                               |
| N | O04486 | DR | protein transport                                                                                                                                                                                                                                                                                                                                                                         |
| N | O04486 | DR | small GTPase mediated signal transduction                                                                                                                                                                                                                                                                                                                                                 |
| N | O05086 | DE | Uncharacterized transposase-like protein HI_1721;                                                                                                                                                                                                                                                                                                                                         |
| N | O05086 | DR | DNA integration                                                                                                                                                                                                                                                                                                                                                                           |
| N | O05086 | DR | DNA recombination                                                                                                                                                                                                                                                                                                                                                                         |
| N | O05086 | DR | transposition                                                                                                                                                                                                                                                                                                                                                                             |
| N | O05236 | DE | Uncharacterized HTH-type transcriptional regulator yugG;                                                                                                                                                                                                                                                                                                                                  |
| N | O05236 | DR | regulation of transcription, DNA-dependent                                                                                                                                                                                                                                                                                                                                                |
| N | O05236 | DR | sequence-specific DNA binding                                                                                                                                                                                                                                                                                                                                                             |
| N | O05236 | DR | sequence-specific DNA binding transcription factor activity                                                                                                                                                                                                                                                                                                                               |
| N | O05975 | DE | Uncharacterized protein RP785;                                                                                                                                                                                                                                                                                                                                                            |
| N | O06051 | CC | One of the primary rRNA binding proteins, it binds specifically to the 5'-end of 16S ribosomal RNA (By similarity).                                                                                                                                                                                                                                                                       |
| N | O06051 | DE | 30S ribosomal protein S17;                                                                                                                                                                                                                                                                                                                                                                |
| N | O06051 | DR | structural constituent of ribosome                                                                                                                                                                                                                                                                                                                                                        |
| N | O06914 | DE | Fumarate reductase iron-sulfur subunit;                                                                                                                                                                                                                                                                                                                                                   |
| N | O06914 | DR | 2 iron, 2 sulfur cluster binding                                                                                                                                                                                                                                                                                                                                                          |
| N | O06914 | DR | 3 iron, 4 sulfur cluster binding                                                                                                                                                                                                                                                                                                                                                          |
| N | O06914 | DR | 4 iron, 4 sulfur cluster binding                                                                                                                                                                                                                                                                                                                                                          |
| N | O06914 | DR | electron carrier activity                                                                                                                                                                                                                                                                                                                                                                 |
| N | O06914 | DR | electron transport chain                                                                                                                                                                                                                                                                                                                                                                  |
| N | O06914 | DR | metal ion binding                                                                                                                                                                                                                                                                                                                                                                         |
| N | O06914 | DR | succinate dehydrogenase activity                                                                                                                                                                                                                                                                                                                                                          |
| N | O06914 | DR | tricarboxylic acid cycle                                                                                                                                                                                                                                                                                                                                                                  |
| N | O06974 | DE | UPF0052 protein yvcK;                                                                                                                                                                                                                                                                                                                                                                     |
| N | O07005 | DE | UPF0311 protein yveG;                                                                                                                                                                                                                                                                                                                                                                     |
| N | O07589 | DE | UPF0053 protein yhdT;                                                                                                                                                                                                                                                                                                                                                                     |
| N | O07589 | DR | catalytic activity                                                                                                                                                                                                                                                                                                                                                                        |
| N | O07589 | DR | flavin adenine dinucleotide binding                                                                                                                                                                                                                                                                                                                                                       |
| N | O07589 | DR | oxidation-reduction process                                                                                                                                                                                                                                                                                                                                                               |
| N | O07617 | CC | Phosphatase with broad substrate specificity                                                                                                                                                                                                                                                                                                                                              |
| N | O07617 | CC | Does not have phosphoglycerate mutase activity.                                                                                                                                                                                                                                                                                                                                           |
| N | O07617 | DE | Uncharacterized phosphatase phoE;                                                                                                                                                                                                                                                                                                                                                         |
| N | O07617 | DR | hydrolase activity                                                                                                                                                                                                                                                                                                                                                                        |
| N | O08314 | CC | Exchanges the guanine residue with 7-aminomethyl-7-deazaguanine in tRNAs with GU(N) anticodons (tRNA-Asp, -Asn, -His and -Tyr) After this exchange, a cyclopentendiol moiety is attached to the 7-aminomethyl group of 7-deazaguanine, resulting in the hypermodified nucleoside queuosine (Q) (7-(((4,5-cis-dihydroxy-2-cyclopenten-1-yl)amino)methyl)-7-deazaguanosine) (By similarity) |
| N | O08314 | CC |                                                                                                                                                                                                                                                                                                                                                                                           |
| N | O08314 | DE | Guanine insertion enzyme;                                                                                                                                                                                                                                                                                                                                                                 |
| N | O08314 | DE | Queuine tRNA-ribosyltransferase;                                                                                                                                                                                                                                                                                                                                                          |
| N | O08314 | DE | tRNA-guanine transglycosylase;                                                                                                                                                                                                                                                                                                                                                            |
| N | O08314 | DR | metal ion binding                                                                                                                                                                                                                                                                                                                                                                         |
| N | O08314 | DR | queuine tRNA-ribosyltransferase activity                                                                                                                                                                                                                                                                                                                                                  |
| N | O08314 | DR | queuosine biosynthetic process                                                                                                                                                                                                                                                                                                                                                            |
| N | O08665 | CC | Plays a role in growth cones guidance                                                                                                                                                                                                                                                                                                                                                     |
| N | O08665 | CC | May function to pattern sensory projections by selectively repelling axons that normally terminate dorsally.                                                                                                                                                                                                                                                                              |
| N | O08665 | DE | Semaphorin III;                                                                                                                                                                                                                                                                                                                                                                           |
| N | O08665 | DE | Semaphorin-3A;                                                                                                                                                                                                                                                                                                                                                                            |
| N | O08665 | DE | Semaphorin-D;                                                                                                                                                                                                                                                                                                                                                                             |
| N | O08665 | DR | axon guidance                                                                                                                                                                                                                                                                                                                                                                             |

|   |        |    |                                                                                                                                                                                                                                                          |
|---|--------|----|----------------------------------------------------------------------------------------------------------------------------------------------------------------------------------------------------------------------------------------------------------|
| N | O08665 | DR | axonal fasciculation                                                                                                                                                                                                                                     |
| N | O08665 | DR | chemorepellent activity                                                                                                                                                                                                                                  |
| N | O08665 | DR | dichotomous subdivision of terminal units involved in salivary gland branching                                                                                                                                                                           |
| N | O08665 | DR | negative regulation of axon extension involved in axon guidance                                                                                                                                                                                          |
| N | O08665 | DR | negative regulation of epithelial cell migration                                                                                                                                                                                                         |
| N | O08665 | DR | receptor activity                                                                                                                                                                                                                                        |
| N | O08665 | DR | regulation of heart rate                                                                                                                                                                                                                                 |
| N | O08811 | CC | ATP-dependent 5'-3' DNA helicase, component of the core- TFIIF basal transcription factor                                                                                                                                                                |
| N | O08811 | CC | As part of the mitotic spindle-associated MMXD complex it plays a role in chromosome segregation                                                                                                                                                         |
| N | O08811 | CC | Involved in nucleotide excision repair (NER) of DNA by opening DNA around the damage, and in RNA transcription by RNA polymerase II by anchoring the CDK-activating kinase (CAK) complex, composed of CDK7, cyclin H and MAT1, to the core-TFIIF complex |
| N | O08811 | CC | Involved in the regulation of vitamin-D receptor activity                                                                                                                                                                                                |
| N | O08811 | CC | Might have a role in aging process and could play a causative role in the generation of skin cancers (By similarity).                                                                                                                                    |
| N | O08811 | DE | DNA excision repair protein ERCC-2;                                                                                                                                                                                                                      |
| N | O08811 | DE | DNA repair protein complementing XP-D cells;                                                                                                                                                                                                             |
| N | O08811 | DE | TFIIF basal transcription factor complex helicase XPD subunit;                                                                                                                                                                                           |
| N | O08811 | DE | Xeroderma pigmentosum group D-complementing protein;                                                                                                                                                                                                     |
| N | O08811 | DR | ATP-dependent DNA helicase activity                                                                                                                                                                                                                      |
| N | O08811 | DR | UV protection                                                                                                                                                                                                                                            |
| N | O08811 | DR | bone mineralization                                                                                                                                                                                                                                      |
| N | O08811 | DR | cell proliferation                                                                                                                                                                                                                                       |
| N | O08811 | DR | central nervous system myelin formation                                                                                                                                                                                                                  |
| N | O08811 | DR | chromosome segregation                                                                                                                                                                                                                                   |
| N | O08811 | DR | embryonic cleavage                                                                                                                                                                                                                                       |
| N | O08811 | DR | erythrocyte maturation                                                                                                                                                                                                                                   |
| N | O08811 | DR | extracellular matrix organization                                                                                                                                                                                                                        |
| N | O08811 | DR | hair cell differentiation                                                                                                                                                                                                                                |
| N | O08811 | DR | hair follicle maturation                                                                                                                                                                                                                                 |
| N | O08811 | DR | hemopoietic stem cell differentiation                                                                                                                                                                                                                    |
| N | O08811 | DR | in utero embryonic development                                                                                                                                                                                                                           |
| N | O08811 | DR | induction of apoptosis                                                                                                                                                                                                                                   |
| N | O08811 | DR | iron-sulfur cluster binding                                                                                                                                                                                                                              |
| N | O08811 | DR | metal ion binding                                                                                                                                                                                                                                        |
| N | O08811 | DR | multicellular organism growth                                                                                                                                                                                                                            |
| N | O08811 | DR | negative regulation of apoptosis                                                                                                                                                                                                                         |
| N | O08811 | DR | positive regulation of DNA binding                                                                                                                                                                                                                       |
| N | O08811 | DR | post-embryonic development                                                                                                                                                                                                                               |
| N | O08811 | DR | response to oxidative stress                                                                                                                                                                                                                             |
| N | O08811 | DR | skin development                                                                                                                                                                                                                                         |
| N | O08811 | DR | spinal cord development                                                                                                                                                                                                                                  |
| N | O08811 | DR | transcription from RNA polymerase II promoter                                                                                                                                                                                                            |
| N | O08811 | DR | transcription-coupled nucleotide-excision repair                                                                                                                                                                                                         |
| N | O14050 | DE | Uncharacterized mscS family protein C2C4.17c;                                                                                                                                                                                                            |
| N | O14050 | DR | cellular response to stress                                                                                                                                                                                                                              |
| N | O14050 | DR | transmembrane transport                                                                                                                                                                                                                                  |
| N | O14132 | CC | Protein kinase which is essential for spore formation.                                                                                                                                                                                                   |
| N | O14132 | DE | Sporulation protein kinase pit1;                                                                                                                                                                                                                         |
| N | O14132 | DR | ascospore formation                                                                                                                                                                                                                                      |
| N | O14132 | DR | protein phosphorylation                                                                                                                                                                                                                                  |
| N | O14132 | DR | protein serine/threonine kinase activity                                                                                                                                                                                                                 |
| N | O14132 | DR | signal transduction                                                                                                                                                                                                                                      |
| N | O14325 | DE | Uncharacterized AAA domain-containing protein C16E9.10c;                                                                                                                                                                                                 |
| N | O14325 | DR | nucleoside-triphosphatase activity                                                                                                                                                                                                                       |
| N | O14342 | DE | Uncharacterized protein C2F12.12c;                                                                                                                                                                                                                       |
| N | O14442 | CC | Catalyzes C14-demethylation of lanosterol which is crucial for ergosterol biosynthesis                                                                                                                                                                   |
| N | O14442 | CC | It transforms lanosterol into 4,4-dimethylcholesta-8,14,24-triene-3-beta-ol (by similarity)                                                                                                                                                              |
| N | O14442 | DE | Cytochrome P450 51;                                                                                                                                                                                                                                      |
| N | O14442 | DE | Cytochrome P450-14DM;                                                                                                                                                                                                                                    |
| N | O14442 | DE | Cytochrome P450-LIA1;                                                                                                                                                                                                                                    |
| N | O14442 | DE | Eburicol 14-alpha-demethylase;                                                                                                                                                                                                                           |



|   |        |    |                                                                                                                                                                                                                                                  |
|---|--------|----|--------------------------------------------------------------------------------------------------------------------------------------------------------------------------------------------------------------------------------------------------|
| N | O14442 | DE | Sterol 14-alpha demethylase;                                                                                                                                                                                                                     |
| N | O14442 | DR | electron carrier activity                                                                                                                                                                                                                        |
| N | O14442 | DR | oxidation-reduction process                                                                                                                                                                                                                      |
| N | O14442 | DR | sterol 14-demethylase activity                                                                                                                                                                                                                   |
| N | O14442 | DR | sterol biosynthetic process                                                                                                                                                                                                                      |
| N | O14604 | CC | Plays an important role in the organization of the cytoskeleton                                                                                                                                                                                  |
| N | O14604 | CC | Binds to and sequesters actin monomers (G actin) and therefore inhibits actin polymerization (By similarity).                                                                                                                                    |
| N | O14604 | DE | Thymosin beta-4, Y-chromosomal;                                                                                                                                                                                                                  |
| N | O14604 | DR | actin binding                                                                                                                                                                                                                                    |
| N | O14604 | DR | actin cytoskeleton organization                                                                                                                                                                                                                  |
| N | O14604 | DR | sequestering of actin monomers                                                                                                                                                                                                                   |
| N | O15172 | DE | L-3-phosphoserine-phosphatase homolog;                                                                                                                                                                                                           |
| N | O15172 | DE | Putative phosphoserine phosphatase-like protein;                                                                                                                                                                                                 |
| N | O15172 | DR | cell proliferation                                                                                                                                                                                                                               |
| N | O15172 | DR | phosphoserine phosphatase activity                                                                                                                                                                                                               |
| N | O15226 | CC | Interacts with a specific negative regulatory element (NRE) 5'-AATTCCTCTGA-3' to mediate transcriptional repression of certain NK-kappa-B responsive genes.                                                                                      |
| N | O15226 | CC | Also involved in the regulation of IL-8 transcription.                                                                                                                                                                                           |
| N | O15226 | CC | Involved in the constitutive silencing of the interferon beta promoter, independently of the virus-induced signals, and in the inhibition of the basal and cytokine-induced iNOS promoter activity                                               |
| N | O15226 | DE | NF-kappa-B-repressing factor;                                                                                                                                                                                                                    |
| N | O15226 | DE | NFkB-repressing factor;                                                                                                                                                                                                                          |
| N | O15226 | DE | Protein ITBA4;                                                                                                                                                                                                                                   |
| N | O15226 | DE | Transcription factor NRF;                                                                                                                                                                                                                        |
| N | O15226 | DR | double-stranded RNA binding                                                                                                                                                                                                                      |
| N | O15226 | DR | specific transcriptional repressor activity                                                                                                                                                                                                      |
| N | O15360 | CC | DNA repair protein that may operate in a postreplication repair or a cell cycle checkpoint function                                                                                                                                              |
| N | O15360 | CC | May be involved in interstrand DNA cross-link repair and in the maintenance of normal chromosome stability.                                                                                                                                      |
| N | O15360 | DE | Fanconi anemia group A protein;                                                                                                                                                                                                                  |
| N | O15360 | DE | Protein FACA;                                                                                                                                                                                                                                    |
| N | O15360 | DR | protein binding                                                                                                                                                                                                                                  |
| N | O15360 | DR | protein complex assembly                                                                                                                                                                                                                         |
| N | O16053 | DE | Protein CDV3 homolog;                                                                                                                                                                                                                            |
| N | O16053 | DE | Protein anon-2C9;                                                                                                                                                                                                                                |
| N | O16785 | CC | Involved in the regulation of cell adhesion and cytoskeleton organization                                                                                                                                                                        |
| N | O16785 | CC | Required to recruit unc-89 and myofilaments to newly forming attachments, and also to reposition the attachments so that they form the highly ordered array of dense body and M-line attachments that are characteristic of mature muscle cells. |
| N | O16785 | DE | Actopaxin homolog;                                                                                                                                                                                                                               |
| N | O16785 | DE | Paralyzed arrest at two-fold protein 6;                                                                                                                                                                                                          |
| N | O16785 | DE | Parvin-like protein;                                                                                                                                                                                                                             |
| N | O16785 | DR | actin binding                                                                                                                                                                                                                                    |
| N | O16785 | DR | cell adhesion                                                                                                                                                                                                                                    |
| N | O16785 | DR | determination of adult lifespan                                                                                                                                                                                                                  |
| N | O16785 | DR | embryo development ending in birth or egg hatching                                                                                                                                                                                               |
| N | O16785 | DR | nematode larval development                                                                                                                                                                                                                      |
| N | O16785 | DR | striated muscle contraction involved in embryonic body morphogenesis                                                                                                                                                                             |
| N | O16785 | DR | striated muscle myosin thick filament assembly                                                                                                                                                                                                   |
| N | O18920 | CC | Binds and activates TIE2 receptor by inducing its tyrosine phosphorylation                                                                                                                                                                       |
| N | O18920 | CC | Appears to play a crucial role in mediating reciprocal interactions between the endothelium and surrounding matrix and mesenchyme                                                                                                                |
| N | O18920 | CC | Implicated in endometrial developmental processes later and distinct from that of VEGF                                                                                                                                                           |
| N | O18920 | CC | It may play an important role in the heart early development (By similarity).                                                                                                                                                                    |
| N | O18920 | CC | Mediates blood vessel maturation/stability                                                                                                                                                                                                       |
| N | O18920 | DE | Angiopoietin-1;                                                                                                                                                                                                                                  |
| N | O18920 | DR | cell differentiation                                                                                                                                                                                                                             |
| N | O19909 | CC | Light-harvesting photosynthetic tetrapyrrole chromophore-protein from the phycobiliprotein complex.                                                                                                                                              |
| N | O19909 | DE | C-phycoerythrin beta chain;                                                                                                                                                                                                                      |
| N | O19909 | DR | electron transport chain                                                                                                                                                                                                                         |
| N | O19909 | DR | mannitol transport                                                                                                                                                                                                                               |

|   |        |    |                                                                                                                                                                                                                                   |
|---|--------|----|-----------------------------------------------------------------------------------------------------------------------------------------------------------------------------------------------------------------------------------|
| N | O19909 | DR | photosynthesis                                                                                                                                                                                                                    |
| N | O19909 | DR | protein-chromophore linkage                                                                                                                                                                                                       |
| N | O19989 | CC | RuBisCO catalyzes two reactions: the carboxylation of D- ribulose 1,5-bisphosphate, the primary event in carbon dioxide fixation, as well as the oxidative fragmentation of the pentose substrate in the photorespiration process |
| N | O19989 | CC | Both reactions occur simultaneously and in competition at the same active site (By similarity).                                                                                                                                   |
| N | O19989 | DE | Ribulose biphosphate carboxylase large chain;                                                                                                                                                                                     |
| N | O19989 | DE | RuBisCO large subunit;                                                                                                                                                                                                            |
| N | O19989 | DR | magnesium ion binding                                                                                                                                                                                                             |
| N | O19989 | DR | monooxygenase activity                                                                                                                                                                                                            |
| N | O19989 | DR | oxidation-reduction process                                                                                                                                                                                                       |
| N | O19989 | DR | photorespiration                                                                                                                                                                                                                  |
| N | O19989 | DR | reductive pentose-phosphate cycle                                                                                                                                                                                                 |
| N | O19989 | DR | ribulose-bisphosphate carboxylase activity                                                                                                                                                                                        |
| N | O20159 | DE | Uncharacterized 79.7 kDa protein in psaB-ycf62 intergenic region; Core subunit of the mitochondrial membrane respiratory chain NADH                                                                                               |
| N | O21543 | CC | dehydrogenase (Complex I) that is believed to belong to the minimal assembly                                                                                                                                                      |
| N | O21543 | CC | complex for catalysis in the transfer of electrons from NADH to the respiratory chain                                                                                                                                             |
| N | O21543 | CC | The immediate electron acceptor for the enzyme is believed to be ubiquinone (By similarity).                                                                                                                                      |
| N | O21543 | DE | NADH dehydrogenase subunit 3;                                                                                                                                                                                                     |
| N | O21543 | DE | NADH-ubiquinone oxidoreductase chain 3;                                                                                                                                                                                           |
| N | O21543 | DR | NADH dehydrogenase (ubiquinone) activity                                                                                                                                                                                          |
| N | O21543 | DR | electron transport chain                                                                                                                                                                                                          |
| N | O22165 | CC | Involved in the biogenesis of the 60S ribosomal subunit                                                                                                                                                                           |
| N | O22165 | CC | Ensures the docking of NOG1 to pre-60S particles (By similarity).                                                                                                                                                                 |
| N | O22165 | DE | Probable ribosome biogenesis protein RLP24;                                                                                                                                                                                       |
| N | O22165 | DR | ribosome biogenesis                                                                                                                                                                                                               |
| N | O22165 | DR | structural constituent of ribosome                                                                                                                                                                                                |
| N | O23115 | CC | Probable transcription factor acting as a positive regulator in the ethylene response pathway                                                                                                                                     |
| N | O23115 | CC | Could bind the primary ethylene response element present in the ETHYLENE-RESPONSE-FACTOR1 promoter.                                                                                                                               |
| N | O23115 | DE | ETHYLENE INSENSITIVE 3-like 2 protein;                                                                                                                                                                                            |
| N | O23115 | DR | ethylene mediated signaling pathway                                                                                                                                                                                               |
| N | O23115 | DR | sequence-specific DNA binding transcription factor activity                                                                                                                                                                       |
| N | O23115 | DR | transcription regulator activity                                                                                                                                                                                                  |
| N | O23420 | CC | May only reduce GSH-thiol disulfides, but not protein disulfides (Potential).                                                                                                                                                     |
| N | O23420 | DE | Monothiol glutaredoxin-S5;                                                                                                                                                                                                        |
| N | O23420 | DE | Protein ROXY 12;                                                                                                                                                                                                                  |
| N | O23420 | DR | 2 iron, 2 sulfur cluster binding                                                                                                                                                                                                  |
| N | O23420 | DR | cell redox homeostasis                                                                                                                                                                                                            |
| N | O23420 | DR | electron carrier activity                                                                                                                                                                                                         |
| N | O23420 | DR | metal ion binding                                                                                                                                                                                                                 |
| N | O23420 | DR | protein disulfide oxidoreductase activity                                                                                                                                                                                         |
| N | O23651 | DE | Terpenoid synthase 1;                                                                                                                                                                                                             |
| N | O23651 | DR | lyase activity                                                                                                                                                                                                                    |
| N | O23651 | DR | magnesium ion binding                                                                                                                                                                                                             |
| N | O24325 | CC | Asparagine-specific endopeptidase                                                                                                                                                                                                 |
| N | O24325 | CC | Probably involved in the degradation of phaseolin during and after germination.                                                                                                                                                   |
| N | O24325 | DE | Legumain-like proteinase;                                                                                                                                                                                                         |
| N | O24325 | DE | Vacuolar-processing enzyme;                                                                                                                                                                                                       |
| N | O24325 | DR | cysteine-type endopeptidase activity                                                                                                                                                                                              |
| N | O24388 | CC | Inhibitor of cysteine proteases                                                                                                                                                                                                   |
| N | O24388 | CC | May protect the plant by inhibiting proteases of invading organisms.                                                                                                                                                              |
| N | O24388 | DE | Cysteine protease inhibitor 3;                                                                                                                                                                                                    |
| N | O24388 | DR | cysteine-type endopeptidase inhibitor activity                                                                                                                                                                                    |
| N | O25775 | CC | Involved in rRNA and/or ribosome maturation and assembly                                                                                                                                                                          |
| N | O25775 | CC | May have metal-dependent hydrolase activity (By similarity).                                                                                                                                                                      |
| N | O25775 | CC | Required for normal 5' and 3' processing of 16S, 23S and 5S rRNAs                                                                                                                                                                 |
| N | O25775 | DE | Probable rRNA maturation factor;                                                                                                                                                                                                  |
| N | O25775 | DR | metal ion binding                                                                                                                                                                                                                 |
| N | O25775 | DR | metalloendopeptidase activity                                                                                                                                                                                                     |
| N | O25775 | DR | rRNA processing                                                                                                                                                                                                                   |

|   |        |    |                                                                                                                                                                                                                                         |
|---|--------|----|-----------------------------------------------------------------------------------------------------------------------------------------------------------------------------------------------------------------------------------------|
| N | O25853 | CC | NDH-1 shuttles electrons from NADH, via FMN and iron- sulfur (Fe-S) centers, to quinones in the respiratory chain                                                                                                                       |
| N | O25853 | CC | Couples the redox reaction to proton translocation (for every two electrons transferred, four hydrogen ions are translocated across the cytoplasmic membrane), and thus conserves the redox energy in a proton gradient (By similarity) |
| N | O25853 | CC | The immediate electron acceptor for the enzyme in this species is believed to be ubiquinone                                                                                                                                             |
| N | O25853 | DE | NADH dehydrogenase I subunit D;                                                                                                                                                                                                         |
| N | O25853 | DE | NADH-quinone oxidoreductase subunit D;                                                                                                                                                                                                  |
| N | O25853 | DE | NDH-1 subunit D;                                                                                                                                                                                                                        |
| N | O25853 | DR | NADH dehydrogenase (quinone) activity                                                                                                                                                                                                   |
| N | O25853 | DR | oxidation-reduction process                                                                                                                                                                                                             |
| N | O25853 | DR | quinone binding                                                                                                                                                                                                                         |
| N | O27001 | CC | Transcriptional activator of the fmdECB operon (By similarity).                                                                                                                                                                         |
| N | O27001 | DE | DNA-binding protein tfx;                                                                                                                                                                                                                |
| N | O27001 | DR | regulation of transcription, DNA-dependent                                                                                                                                                                                              |
| N | O27001 | DR | sequence-specific DNA binding transcription factor activity                                                                                                                                                                             |
| N | O27001 | DR | sigma factor activity                                                                                                                                                                                                                   |
| N | O27001 | DR | transcription initiation, DNA-dependent                                                                                                                                                                                                 |
| N | O27198 | DE | UPF0348 protein MTH_1126;                                                                                                                                                                                                               |
| N | O27274 | CC | Catalyzes the decarboxylation of sulfoxyruvic acid to sulfoacetaldehyde (By similarity)                                                                                                                                                 |
| N | O27274 | DE | Sulfoxyruvate decarboxylase subunit alpha;                                                                                                                                                                                              |
| N | O27274 | DR | coenzyme M biosynthetic process                                                                                                                                                                                                         |
| N | O27274 | DR | sulfoxyruvate decarboxylase activity                                                                                                                                                                                                    |
| N | O27274 | DR | thiamine pyrophosphate binding                                                                                                                                                                                                          |
| N | O27664 | CC | General factor that plays a role in the activation of archaeal genes transcribed by RNA polymerase                                                                                                                                      |
| N | O27664 | CC | Binds specifically to the TATA box promoter element which lies close to the position of transcription initiation (By similarity).                                                                                                       |
| N | O27664 | DE | Box A-binding protein;                                                                                                                                                                                                                  |
| N | O27664 | DE | TATA sequence-binding protein;                                                                                                                                                                                                          |
| N | O27664 | DE | TATA-box factor;                                                                                                                                                                                                                        |
| N | O27664 | DE | TATA-box-binding protein;                                                                                                                                                                                                               |
| N | O27664 | DR | RNA polymerase II transcription factor activity                                                                                                                                                                                         |
| N | O27664 | DR | regulation of transcription, DNA-dependent                                                                                                                                                                                              |
| N | O27664 | DR | transcription initiation from RNA polymerase II promoter                                                                                                                                                                                |
| N | O27957 | DE | Shikimate dehydrogenase;                                                                                                                                                                                                                |
| N | O27957 | DR | aromatic amino acid family biosynthetic process                                                                                                                                                                                         |
| N | O27957 | DR | oxidation-reduction process                                                                                                                                                                                                             |
| N | O27957 | DR | shikimate 5-dehydrogenase activity                                                                                                                                                                                                      |
| N | O28187 | DE | Uncharacterized protein AF_2093;                                                                                                                                                                                                        |
| N | O28512 | DE | Uncharacterized protein AF_1762;                                                                                                                                                                                                        |
| N | O28557 | DE | Uncharacterized protein AF_1717;                                                                                                                                                                                                        |
| N | O28578 | CC | Catalyzes the NADPH-dependent reduction of ketopantoate into pantoic acid (By similarity).                                                                                                                                              |
| N | O28578 | DE | KPA reductase;                                                                                                                                                                                                                          |
| N | O28578 | DE | Ketopantoate reductase;                                                                                                                                                                                                                 |
| N | O28578 | DE | Putative 2-dehydropantoate 2-reductase;                                                                                                                                                                                                 |
| N | O28578 | DR | 2-dehydropantoate 2-reductase activity                                                                                                                                                                                                  |
| N | O28578 | DR | oxidation-reduction process                                                                                                                                                                                                             |
| N | O28578 | DR | pantothenate biosynthetic process                                                                                                                                                                                                       |
| N | O28965 | DE | Triose-phosphate isomerase;                                                                                                                                                                                                             |
| N | O28965 | DE | Triosephosphate isomerase;                                                                                                                                                                                                              |
| N | O28965 | DR | gluconeogenesis                                                                                                                                                                                                                         |
| N | O28965 | DR | pentose-phosphate shunt                                                                                                                                                                                                                 |
| N | O28965 | DR | triose-phosphate isomerase activity                                                                                                                                                                                                     |
| N | O29525 | DE | Probable thiamine-monophosphate kinase;                                                                                                                                                                                                 |
| N | O29525 | DE | Thiamine-phosphate kinase;                                                                                                                                                                                                              |
| N | O29525 | DR | thiamine biosynthetic process                                                                                                                                                                                                           |
| N | O29525 | DR | thiamine-phosphate kinase activity                                                                                                                                                                                                      |
| N | O29697 | DE | UPF0033 protein AF_0554;                                                                                                                                                                                                                |
| N | O29697 | DR | sulfurtransferase activity                                                                                                                                                                                                              |
| N | O29697 | DR | tRNA processing                                                                                                                                                                                                                         |
| N | O29760 | CC | Component of the proteasome core, a large protease complex with broad specificity involved in protein degradation (By similarity).                                                                                                      |

|   |        |    |                                                                                                                                                                                                                                            |
|---|--------|----|--------------------------------------------------------------------------------------------------------------------------------------------------------------------------------------------------------------------------------------------|
| N | O29760 | DE | 20S proteasome alpha subunit;                                                                                                                                                                                                              |
| N | O29760 | DE | Proteasome core protein PsmA;                                                                                                                                                                                                              |
| N | O29760 | DE | Proteasome subunit alpha;                                                                                                                                                                                                                  |
| N | O29760 | DR | threonine-type endopeptidase activity                                                                                                                                                                                                      |
| N | O29760 | DR | ubiquitin-dependent protein catabolic process                                                                                                                                                                                              |
| N | O30257 | DE | Uncharacterized HTH-type transcriptional regulator AF_2414;                                                                                                                                                                                |
| N | O30257 | DR | sequence-specific DNA binding                                                                                                                                                                                                              |
| N | O31019 | DE | Carbamate kinase;                                                                                                                                                                                                                          |
| N | O31019 | DR | arginine metabolic process                                                                                                                                                                                                                 |
| N | O31019 | DR | carbamate kinase activity                                                                                                                                                                                                                  |
| N | O31019 | DR | cellular amino acid biosynthetic process                                                                                                                                                                                                   |
| N | O31046 | CC | Catalyzes the condensation of the acetyl group of acetyl-CoA with 3-methyl-2-oxobutanoate (2-oxoisovalerate) to form 3-carboxy-3-hydroxy-4-methylpentanoate (2-isopropylmalate).                                                           |
| N | O31046 | DE | 2-isopropylmalate synthase;                                                                                                                                                                                                                |
| N | O31046 | DE | Alpha-IPM synthase;                                                                                                                                                                                                                        |
| N | O31046 | DE | Alpha-isopropylmalate synthase;                                                                                                                                                                                                            |
| N | O31046 | DR | 2-isopropylmalate synthase activity                                                                                                                                                                                                        |
| N | O31046 | DR | leucine biosynthetic process                                                                                                                                                                                                               |
| N | O31667 | CC | Dephosphorylates 2-hydroxy-3-keto-5-methylthiopentenyl-1-phosphate (HK-MTPenyl-1-P) yielding 1,2-dihydroxy-3-keto-5-methylthiopentene (DHK-MTPenyl-1-P)                                                                                    |
| N | O31667 | DE | 2-hydroxy-3-keto-5-methylthiopentenyl-1-phosphate phosphatase;                                                                                                                                                                             |
| N | O31667 | DE | HK-MTPenyl-1-P phosphatase;                                                                                                                                                                                                                |
| N | O31667 | DR | L-methionine salvage                                                                                                                                                                                                                       |
| N | O31667 | DR | phosphatase activity                                                                                                                                                                                                                       |
| N | O31806 | DE | Uncharacterized protein YndB;                                                                                                                                                                                                              |
| N | O31806 | DR | response to stress                                                                                                                                                                                                                         |
| N | O31889 | DE | SPBc2 prophage-derived uncharacterized protein yorZ;                                                                                                                                                                                       |
| N | O31919 | DE | SPBc2 prophage-derived uncharacterized protein yoqT;                                                                                                                                                                                       |
| N | O32178 | CC | Involved in the degradation of long-chain fatty acids.                                                                                                                                                                                     |
| N | O32178 | DE | Probable 3-hydroxyacyl-CoA dehydrogenase;                                                                                                                                                                                                  |
| N | O32178 | DR | 3-hydroxyacyl-CoA dehydrogenase activity                                                                                                                                                                                                   |
| N | O32178 | DR | coenzyme binding                                                                                                                                                                                                                           |
| N | O32178 | DR | fatty acid metabolic process                                                                                                                                                                                                               |
| N | O32178 | DR | lipid catabolic process                                                                                                                                                                                                                    |
| N | O32178 | DR | oxidation-reduction process                                                                                                                                                                                                                |
| N | O32271 | CC | Catalyzes the conversion of UDP-glucose into UDP-glucuronate, one of the precursors of teichuronic acid.                                                                                                                                   |
| N | O32271 | DE | Teichuronic acid biosynthesis protein tuaD;                                                                                                                                                                                                |
| N | O32271 | DE | UDP-Glc dehydrogenase;                                                                                                                                                                                                                     |
| N | O32271 | DE | UDP-glucose 6-dehydrogenase tuaD;                                                                                                                                                                                                          |
| N | O32271 | DR | UDP-glucose 6-dehydrogenase activity                                                                                                                                                                                                       |
| N | O32271 | DR | cellular cell wall organization                                                                                                                                                                                                            |
| N | O32271 | DR | oxidation-reduction process                                                                                                                                                                                                                |
| N | O32271 | DR | response to stress                                                                                                                                                                                                                         |
| N | O32507 | CC | Catalyzes the NADP(+) dependent oxidation of succinate semialdehyde to succinate (By similarity).                                                                                                                                          |
| N | O32507 | DE | Succinate-semialdehyde dehydrogenase [NADP+];                                                                                                                                                                                              |
| N | O32507 | DR | oxidation-reduction process                                                                                                                                                                                                                |
| N | O32507 | DR | oxidoreductase activity                                                                                                                                                                                                                    |
| N | O32799 | DE | Formate acetyltransferase;                                                                                                                                                                                                                 |
| N | O32799 | DE | Pyruvate formate-lyase;                                                                                                                                                                                                                    |
| N | O32799 | DR | formate C-acetyltransferase activity                                                                                                                                                                                                       |
| N | O32799 | DR | glucose metabolic process                                                                                                                                                                                                                  |
| N | O33104 | CC | Allows the formation of correctly charged Asn-tRNA(Asn) or Gln-tRNA(Gln) through the transamidation of misacylated Asp-tRNA(Asn) or Glu-tRNA(Gln) in organisms which lack either or both of asparaginyl-tRNA or glutaminy-tRNA synthetases |
| N | O33104 | CC | The reaction takes place in the presence of glutamine and ATP through an activated phospho-Asp-tRNA(Asn) or phospho-Glu-tRNA(Gln) (By similarity).                                                                                         |
| N | O33104 | DE | Glu-ADT subunit C;                                                                                                                                                                                                                         |
| N | O33104 | DE | Glutamyl-tRNA(Gln) amidotransferase subunit C;                                                                                                                                                                                             |
| N | O33104 | DR | ligase activity                                                                                                                                                                                                                            |
| N | O33104 | DR | regulation of translational fidelity                                                                                                                                                                                                       |
| N | O33778 | DE | Phosphoribosyl-AMP cyclohydrolase;                                                                                                                                                                                                         |
| N | O33778 | DR | histidine biosynthetic process                                                                                                                                                                                                             |

|   |        |    |                                                                                                                                                                                |
|---|--------|----|--------------------------------------------------------------------------------------------------------------------------------------------------------------------------------|
| N | O33778 | DR | phosphoribosyl-AMP cyclohydrolase activity                                                                                                                                     |
| N | O34101 | DE | 50S ribosomal protein L32;                                                                                                                                                     |
| N | O34101 | DR | structural constituent of ribosome                                                                                                                                             |
| N | O34163 | CC | Carrier of the growing fatty acid chain in fatty acid biosynthesis (By similarity)                                                                                             |
| N | O34163 | CC | has nemolitic activity forming pores approximately 1 nm in diameter into<br>epithelial cells                                                                                   |
| N | O34163 | CC | Is able to induce murine colonic lesions and to disrupt the integrity of epithelial<br>cell monolayers.                                                                        |
| N | O34163 | DE | Acyl carrier protein;                                                                                                                                                          |
| N | O34163 | DE | Beta-hemolysin;                                                                                                                                                                |
| N | O34163 | DR | acyl carrier activity                                                                                                                                                          |
| N | O34163 | DR | cofactor binding                                                                                                                                                               |
| N | O34163 | DR | fatty acid biosynthetic process                                                                                                                                                |
| N | O34163 | DR | hemolysis in other organism                                                                                                                                                    |
| N | O34163 | DR | phosphopantetheine binding                                                                                                                                                     |
| N | O34346 | DE | D-mannonate hydrolase;                                                                                                                                                         |
| N | O34346 | DE | Mannonate dehydratase;                                                                                                                                                         |
| N | O34346 | DR | glucuronate catabolic process                                                                                                                                                  |
| N | O34346 | DR | mannonate dehydratase activity                                                                                                                                                 |
| N | O34767 | CC | Converts oxalate to formate and CO(2).                                                                                                                                         |
| N | O34767 | DE | Oxalate decarboxylase oxdD;                                                                                                                                                    |
| N | O34767 | DR | metal ion binding                                                                                                                                                              |
| N | O34767 | DR | nutrient reservoir activity                                                                                                                                                    |
| N | O34767 | DR | oxalate decarboxylase activity                                                                                                                                                 |
| N | O34860 | CC | One of 4 functionally non-identical rsbR paralogs, it functions in the<br>environmental signaling branch of the general stress response.                                       |
| N | O34860 | DE | RsbT co-antagonist protein rsbRB;                                                                                                                                              |
| N | O34860 | DE | Stressosome protein rsbRB;                                                                                                                                                     |
| N | O34912 | DE | Histidine biosynthesis bifunctional protein HisIE;                                                                                                                             |
| N | O34912 | DE | Phosphoribosyl-AMP cyclohydrolase;                                                                                                                                             |
| N | O34912 | DE | Phosphoribosyl-ATP pyrophosphatase;                                                                                                                                            |
| N | O34912 | DR | histidine biosynthetic process                                                                                                                                                 |
| N | O34912 | DR | phosphoribosyl-AMP cyclohydrolase activity                                                                                                                                     |
| N | O34912 | DR | phosphoribosyl-ATP diphosphatase activity                                                                                                                                      |
| N | O34970 | DE | Probable HTH-type transcriptional regulator yttP;                                                                                                                              |
| N | O34970 | DE | Stress response protein yttP;                                                                                                                                                  |
| N | O34970 | DR | regulation of transcription, DNA-dependent                                                                                                                                     |
| N | O34970 | DR | response to stress                                                                                                                                                             |
| N | O34970 | DR | sequence-specific DNA binding transcription factor activity                                                                                                                    |
| N | O34970 | DR | specific transcriptional repressor activity                                                                                                                                    |
| N | O35017 | DE | Uncharacterized zinc-type alcohol dehydrogenase-like protein YogA;                                                                                                             |
| N | O35017 | DR | oxidation-reduction process                                                                                                                                                    |
| N | O35017 | DR | oxidoreductase activity                                                                                                                                                        |
| N | O35017 | DR | zinc ion binding                                                                                                                                                               |
| N | O35095 | CC | Probably involved in signal transduction, in the nervous system, via increasing<br>cell surface localization of GRM5 and positively regulating its signaling                   |
| N | O35095 | CC | Acts as a negative regulator of Ca(2+)- calmodulin-dependent protein kinase 2<br>(CaMK2) phosphorylation                                                                       |
| N | O35095 | CC | May also be involved in neurite outgrowth.                                                                                                                                     |
| N | O35095 | CC | May be involved in bone metabolism                                                                                                                                             |
| N | O35095 | CC | may play a role in modulating melanin-concentrating hormone-mediated<br>functions via its interaction with MCHR1 that interferes with G protein-coupled<br>signal transduction |
| N | O35095 | CC | Required for the spatial learning process                                                                                                                                      |
| N | O35095 | DE | Neurite outgrowth-related protein from the rat brain;                                                                                                                          |
| N | O35095 | DE | Neurochondrin;                                                                                                                                                                 |
| N | O35095 | DR | neuron projection development                                                                                                                                                  |
| N | O35095 | DR | protein binding                                                                                                                                                                |
| N | O35095 | DR | regulation of neuronal synaptic plasticity                                                                                                                                     |
| N | O35394 | CC | General rho protein regulator required for vesicle formation from the Golgi<br>complex                                                                                         |
| N | O35394 | CC | In addition it inhibits the removal of Rab GTPases from the membrane by GDI1.                                                                                                  |
| N | O35394 | CC | May control vesicle docking and fusion by mediating the action of Rab GTPases<br>to the SNARE complexes                                                                        |
| N | O35394 | DE | PRA1 family protein 1;                                                                                                                                                         |
| N | O35394 | DE | Prenylated Rab acceptor protein 1;                                                                                                                                             |
| N | O35394 | DR | proline-rich region binding                                                                                                                                                    |
| N | O35394 | DR | protein C-terminus binding                                                                                                                                                     |

|   |        |    |                                                                                                                                                  |
|---|--------|----|--------------------------------------------------------------------------------------------------------------------------------------------------|
| N | O35394 | DR | protein binding, bridging                                                                                                                        |
| N | O35394 | DR | vesicle-mediated transport                                                                                                                       |
| N | O35492 | CC | phosphorylates serine- and arginine-rich (SR) proteins of the spliceosomal complex                                                               |
| N | O35492 | CC | May be a constituent of a network of regulatory mechanisms that enable SR proteins to control RNA splicing                                       |
| N | O35492 | CC | Phosphorylates serines, threonines and tyrosines.                                                                                                |
| N | O35492 | DE | CDC-like kinase 3;                                                                                                                               |
| N | O35492 | DE | Dual specificity protein kinase CLK3;                                                                                                            |
| N | O35492 | DR | peptidyl-tyrosine phosphorylation                                                                                                                |
| N | O35492 | DR | protein autophosphorylation                                                                                                                      |
| N | O35492 | DR | protein serine/threonine kinase activity                                                                                                         |
| N | O35492 | DR | protein tyrosine kinase activity                                                                                                                 |
| N | O35547 | CC | Activation of long-chain fatty acids for both synthesis of cellular lipids, and degradation via beta-oxidation                                   |
| N | O35547 | CC | Preferentially uses arachidonate and eicosapentaenoate as substrates.                                                                            |
| N | O35547 | DE | Long-chain acyl-CoA synthetase 4;                                                                                                                |
| N | O35547 | DE | Long-chain-fatty-acid--CoA ligase 4;                                                                                                             |
| N | O35547 | DR | dendritic spine development                                                                                                                      |
| N | O35547 | DR | fatty acid metabolic process                                                                                                                     |
| N | O35547 | DR | fatty acid transport                                                                                                                             |
| N | O35547 | DR | long-chain fatty acid-CoA ligase activity                                                                                                        |
| N | O35547 | DR | response to interleukin-15                                                                                                                       |
| N | O35547 | DR | response to nutrient                                                                                                                             |
| N | O35547 | DR | triglyceride metabolic process                                                                                                                   |
| N | O35569 | CC | Direct ligand for ERBB3 and ERBB4 tyrosine kinase receptors                                                                                      |
| N | O35569 | CC | Concomitantly recruits ERBB1 and ERBB2 coreceptors, resulting in ligand-stimulated tyrosine phosphorylation and activation of the ERBB receptors |
| N | O35569 | CC | May also promote the heterodimerization with the EGF receptor.                                                                                   |
| N | O35569 | DE | Neural- and thymus-derived activator for ERBB kinases;                                                                                           |
| N | O35569 | DE | Neuregulin-2;                                                                                                                                    |
| N | O35569 | DE | Pro-neuregulin-2, membrane-bound isoform;                                                                                                        |
| N | O35569 | DR | ErbB-3 class receptor binding                                                                                                                    |
| N | O35569 | DR | embryo development                                                                                                                               |
| N | O35569 | DR | epidermal growth factor receptor activity                                                                                                        |
| N | O35569 | DR | epidermal growth factor receptor binding                                                                                                         |
| N | O35569 | DR | growth factor activity                                                                                                                           |
| N | O35936 | DE | 15-lipoxygenase 2;                                                                                                                               |
| N | O35936 | DE | 8S-lipoxygenase;                                                                                                                                 |
| N | O35936 | DE | Arachidonate 15-lipoxygenase B;                                                                                                                  |
| N | O35936 | DE | Arachidonate 15-lipoxygenase type II;                                                                                                            |
| N | O35936 | DR | arachidonate 15-lipoxygenase activity                                                                                                            |
| N | O35936 | DR | iron ion binding                                                                                                                                 |
| N | O35936 | DR | leukotriene biosynthetic process                                                                                                                 |
| N | O35936 | DR | lipoxygenase activity                                                                                                                            |
| N | O35936 | DR | negative regulation of cell cycle                                                                                                                |
| N | O35936 | DR | negative regulation of cell proliferation                                                                                                        |
| N | O35936 | DR | negative regulation of growth                                                                                                                    |
| N | O35936 | DR | oxidation-reduction process                                                                                                                      |
| N | O42188 | CC | Lacks PA2 enzymatic activity (By similarity).                                                                                                    |
| N | O42188 | DE | Phospholipase A2 homolog;                                                                                                                        |
| N | O42188 | DR | calcium ion binding                                                                                                                              |
| N | O42188 | DR | lipid catabolic process                                                                                                                          |
| N | O42188 | DR | phospholipase A2 activity                                                                                                                        |
| N | O42188 | DR | phospholipid metabolic process                                                                                                                   |
| N | O42242 | CC | Facilitates protein transport into the nucleus                                                                                                   |
| N | O42242 | CC | Acts at a relatively late stage of nuclear protein import, subsequent to the initial docking of nuclear import ligand at the nuclear envelope    |
| N | O42242 | CC | Could be part of a multicomponent system of cytosolic factors that assemble at the pore complex during nuclear import (By similarity).           |
| N | O42242 | CC | Interacts with the nucleoporin p62 and with Ran                                                                                                  |
| N | O42242 | DE | Nuclear transport factor 2;                                                                                                                      |
| N | O42242 | DR | protein transport                                                                                                                                |
| N | O42626 | CC | Controls entry of the cell into the asexual developmental program                                                                                |
| N | O42626 | CC | Required to repress entry into the conidiation program.                                                                                          |
| N | O42626 | DE | Non-repressible conidiation protein 2;                                                                                                           |

|   |        |    |                                                                                                                                                                                                                  |
|---|--------|----|------------------------------------------------------------------------------------------------------------------------------------------------------------------------------------------------------------------|
| N | O42626 | DE | Serine/threonine-protein kinase nrc-2;                                                                                                                                                                           |
| N | O42626 | DR | conidium formation                                                                                                                                                                                               |
| N | O42626 | DR | protein phosphorylation                                                                                                                                                                                          |
| N | O42626 | DR | protein serine/threonine kinase activity                                                                                                                                                                         |
| N | O42626 | DR | sporulation resulting in formation of a cellular spore                                                                                                                                                           |
| N | O42844 | CC | Has a role in the regulation of G2/M transition during mitosis.                                                                                                                                                  |
| N | O42844 | DE | CAM kinase II;                                                                                                                                                                                                   |
| N | O42844 | DE | Calcium/calmodulin-dependent protein kinase type II;                                                                                                                                                             |
| N | O42844 | DR | DNA replication checkpoint                                                                                                                                                                                       |
| N | O42844 | DR | calcium ion binding                                                                                                                                                                                              |
| N | O42844 | DR | calmodulin binding                                                                                                                                                                                               |
| N | O42844 | DR | calmodulin-dependent protein kinase activity                                                                                                                                                                     |
| N | O42844 | DR | cellular response to oxidative stress                                                                                                                                                                            |
| N | O42844 | DR | negative regulation of G2/M transition of mitotic cell cycle                                                                                                                                                     |
| N | O42844 | DR | positive regulation of establishment of bipolar cell polarity resulting in cell shape                                                                                                                            |
| N | O42844 | DR | protein phosphorylation                                                                                                                                                                                          |
| N | O42844 | DR | stress-activated protein kinase signaling cascade                                                                                                                                                                |
| N | O42943 | DE | Uncharacterized ABC transporter ATP-binding protein C16H5.08c;                                                                                                                                                   |
| N | O42943 | DR | ATPase activity                                                                                                                                                                                                  |
| N | O42963 | CC | Functions as a component of the nuclear pore complex (NPC)                                                                                                                                                       |
| N | O42963 | CC | Active directional transport is assured by both, a Phe-Gly (FG) repeat affinity gradient for these transport factors across the NPC and a transport cofactor concentration gradient across the nuclear envelope. |
| N | O42963 | CC | NPC components, collectively referred to as nucleoporins (NUPs), can play the role of both NPC structural components and of docking or interaction partners for transiently associated nuclear transport factors |
| N | O42963 | DE | Nuclear pore protein nup44;                                                                                                                                                                                      |
| N | O42963 | DE | Nucleoporin nup44;                                                                                                                                                                                               |
| N | O42963 | DR | nucleocytoplasmic transport                                                                                                                                                                                      |
| N | O42963 | DR | regulation of mitotic cell cycle                                                                                                                                                                                 |
| N | O43156 | CC | Promotes assembly, stabilizes and maintains the activity of mTORC1 and mTORC2 complexes, which regulate cell growth and survival in response to nutrient and hormonal signals.                                   |
| N | O43156 | DE | Protein SMG10;                                                                                                                                                                                                   |
| N | O43156 | DE | TEL2-interacting protein 1 homolog;                                                                                                                                                                              |
| N | O43765 | CC | Co-chaperone that binds directly to HSC70 and HSP70 and regulates their ATPase activity.                                                                                                                         |
| N | O43765 | DE | Small glutamine-rich tetratricopeptide repeat-containing protein alpha;                                                                                                                                          |
| N | O43765 | DE | Vpu-binding protein;                                                                                                                                                                                             |
| N | O43765 | DR | interspecies interaction between organisms                                                                                                                                                                       |
| N | O43765 | DR | protein binding                                                                                                                                                                                                  |
| N | O45687 | DE | Alcohol dehydrogenase 2;                                                                                                                                                                                         |
| N | O45687 | DE | Sorbitol dehydrogenase family protein 2;                                                                                                                                                                         |
| N | O45687 | DR | alcohol dehydrogenase (NAD) activity                                                                                                                                                                             |
| N | O45687 | DR | determination of adult lifespan                                                                                                                                                                                  |
| N | O45687 | DR | oxidation-reduction process                                                                                                                                                                                      |
| N | O45687 | DR | zinc ion binding                                                                                                                                                                                                 |
| N | O46378 | CC | Affects the rate of fibrils formation                                                                                                                                                                            |
| N | O46378 | CC | May have a primary role in collagen fibrillogenesis (By similarity).                                                                                                                                             |
| N | O46378 | DE | Collagen-binding 59 kDa protein;                                                                                                                                                                                 |
| N | O46378 | DE | Fibromodulin;                                                                                                                                                                                                    |
| N | O46378 | DE | KSPG fibromodulin;                                                                                                                                                                                               |
| N | O46378 | DE | Keratan sulfate proteoglycan fibromodulin;                                                                                                                                                                       |
| N | O46567 | CC | Receptor for glucocorticoids (GC)                                                                                                                                                                                |
| N | O46567 | CC | Affects inflammatory responses, cellular proliferation and differentiation in target tissues                                                                                                                     |
| N | O46567 | CC | Could act as a coactivator for STAT5-dependent transcription upon growth hormone (GH) stimulation and could reveal an essential role of hepatic GR in the control of body growth                                 |
| N | O46567 | CC | Has a dual mode of action: as a transcription factor that binds to glucocorticoid response elements (GRE) and as modulator of other transcription factors                                                        |
| N | O46567 | CC | Involved in chromatin remodeling (By similarity)                                                                                                                                                                 |
| N | O46567 | CC | Involved in nuclear translocation.                                                                                                                                                                               |
| N | O46567 | CC | Plays a significant role in transactivation                                                                                                                                                                      |
| N | O46567 | DE | Glucocorticoid receptor;                                                                                                                                                                                         |
| N | O46567 | DE | Nuclear receptor subfamily 3 group C member 1;                                                                                                                                                                   |

|   |        |    |                                                                                                                                                                                                                                                                                      |
|---|--------|----|--------------------------------------------------------------------------------------------------------------------------------------------------------------------------------------------------------------------------------------------------------------------------------------|
| N | O46567 | DR | chromatin modification                                                                                                                                                                                                                                                               |
| N | O46567 | DR | glucocorticoid receptor activity                                                                                                                                                                                                                                                     |
| N | O46567 | DR | regulation of transcription, DNA-dependent                                                                                                                                                                                                                                           |
| N | O46567 | DR | sequence-specific DNA binding                                                                                                                                                                                                                                                        |
| N | O46567 | DR | sequence-specific DNA binding transcription factor activity                                                                                                                                                                                                                          |
| N | O46567 | DR | steroid binding                                                                                                                                                                                                                                                                      |
| N | O46567 | DR | zinc ion binding                                                                                                                                                                                                                                                                     |
| N | O46639 | CC | Receptor for thyrotropin-releasing hormone                                                                                                                                                                                                                                           |
| N | O46639 | CC | This receptor is mediated by G proteins which activate a phosphatidylinositol-calcium second messenger system.                                                                                                                                                                       |
| N | O46639 | DE | Thyroliberin receptor;                                                                                                                                                                                                                                                               |
| N | O46639 | DE | Thyrotropin-releasing hormone receptor;                                                                                                                                                                                                                                              |
| N | O46639 | DR | thyrotropin-releasing hormone receptor activity                                                                                                                                                                                                                                      |
| N | O48549 | CC | May play an important role in controlling cell growth and proliferation through the selective translation of particular classes of mRNA (By similarity).                                                                                                                             |
| N | O48549 | DE | 40S ribosomal protein S6-1;                                                                                                                                                                                                                                                          |
| N | O48549 | DR | structural constituent of ribosome                                                                                                                                                                                                                                                   |
| N | O50422 | CC | May directly or indirectly regulate the accessibility of the key branch point intermediate, monoacyl phosphatidylinositol tetramannoside (AcPIM4), to the elongating alpha-1,6 mannosyltransferases which could regulate the lipoarabinomannans (LAMs) biosynthesis (By similarity). |
| N | O50422 | DE | Probable monoacyl phosphatidylinositol tetramannoside-binding protein LpqW;                                                                                                                                                                                                          |
| N | O50422 | DR | glycolipid biosynthetic process                                                                                                                                                                                                                                                      |
| N | O50422 | DR | phospholipid biosynthetic process                                                                                                                                                                                                                                                    |
| N | O50422 | DR | transporter activity                                                                                                                                                                                                                                                                 |
| N | O51082 | CC | Excises uracil residues from the DNA which can arise as a result of misincorporation of dUMP residues by DNA polymerase or due to deamination of cytosine (By similarity)                                                                                                            |
| N | O51082 | DE | Uracil-DNA glycosylase;                                                                                                                                                                                                                                                              |
| N | O51082 | DR | base-excision repair                                                                                                                                                                                                                                                                 |
| N | O51082 | DR | uracil DNA N-glycosylase activity                                                                                                                                                                                                                                                    |
| N | O51314 | CC | This protein is one of the early assembly proteins of the 50S ribosomal subunit, although it is not seen to bind rRNA by itself                                                                                                                                                      |
| N | O51314 | CC | It is important during the early stages of 50S assembly (By similarity).                                                                                                                                                                                                             |
| N | O51314 | DE | 50S ribosomal protein L13;                                                                                                                                                                                                                                                           |
| N | O51314 | DR | structural constituent of ribosome                                                                                                                                                                                                                                                   |
| N | O51440 | CC | One of the primary rRNA binding proteins, it binds specifically to the 5'-end of 16S ribosomal RNA (By similarity).                                                                                                                                                                  |
| N | O51440 | DE | 30S ribosomal protein S17;                                                                                                                                                                                                                                                           |
| N | O51440 | DR | structural constituent of ribosome                                                                                                                                                                                                                                                   |
| N | O51875 | CC | F(1)F(0) ATP synthase produces ATP from ADP in the presence of a proton or sodium gradient                                                                                                                                                                                           |
| N | O51875 | CC | During catalysis, ATP synthesis in the catalytic domain of F(1) is coupled via a rotary mechanism of the central stalk subunits to proton translocation (By similarity)                                                                                                              |
| N | O51875 | CC | F-type ATPases consist of two structural domains, F(1) containing the extramembraneous catalytic core and F(0) containing the membrane proton channel, linked together by a central stalk and a peripheral stalk                                                                     |
| N | O51875 | DE | ATP synthase F(1) sector subunit delta;                                                                                                                                                                                                                                              |
| N | O51875 | DE | ATP synthase subunit delta;                                                                                                                                                                                                                                                          |
| N | O51875 | DE | F-ATPase subunit delta;                                                                                                                                                                                                                                                              |
| N | O51875 | DE | F-type ATPase subunit delta;                                                                                                                                                                                                                                                         |
| N | O51875 | DR | ATP synthesis coupled proton transport                                                                                                                                                                                                                                               |
| N | O51875 | DR | hydrogen ion transporting ATP synthase activity, rotational mechanism                                                                                                                                                                                                                |
| N | O52348 | CC | This is one of the proteins that binds and probably mediates the attachment of the 5S RNA into the large ribosomal subunit, where it forms part of the central protuberance (By similarity).                                                                                         |
| N | O52348 | DE | 50S ribosomal protein L18;                                                                                                                                                                                                                                                           |
| N | O52348 | DR | structural constituent of ribosome                                                                                                                                                                                                                                                   |
| N | O54715 | CC | Vacuolar ATPase is responsible for acidifying a variety of intracellular compartments in eukaryotic cells (By similarity).                                                                                                                                                           |
| N | O54715 | DE | C7-1 protein;                                                                                                                                                                                                                                                                        |
| N | O54715 | DE | V-ATPase Ac45 subunit;                                                                                                                                                                                                                                                               |
| N | O54715 | DE | V-ATPase S1 accessory protein;                                                                                                                                                                                                                                                       |
| N | O54715 | DE | V-ATPase subunit S1;                                                                                                                                                                                                                                                                 |
| N | O54715 | DE | V-type proton ATPase subunit S1;                                                                                                                                                                                                                                                     |
| N | O54715 | DE | Vacuolar proton pump subunit S1;                                                                                                                                                                                                                                                     |



|   |        |    |                                                                                                                                                                                                                                                                                                                                                                                            |
|---|--------|----|--------------------------------------------------------------------------------------------------------------------------------------------------------------------------------------------------------------------------------------------------------------------------------------------------------------------------------------------------------------------------------------------|
| N | O54715 | DR | ATP hydrolysis coupled proton transport                                                                                                                                                                                                                                                                                                                                                    |
| N | O54715 | DR | hydrogen ion transporting ATP synthase activity, rotational mechanism                                                                                                                                                                                                                                                                                                                      |
| N | O54715 | DR | proton-transporting ATPase activity, rotational mechanism                                                                                                                                                                                                                                                                                                                                  |
| N | O55101 | DE | Synaptogyrin-2;                                                                                                                                                                                                                                                                                                                                                                            |
| N | O55709 | DE | Putative Bro-N domain-containing protein 069L;                                                                                                                                                                                                                                                                                                                                             |
| N | O58358 | CC | Reversibly transfers an adenylyl group from ATP to 4'-phosphopantetheine, yielding dephospho-CoA (dPCoA) and pyrophosphate (By similarity).                                                                                                                                                                                                                                                |
| N | O58358 | DE | Dephospho-CoA pyrophosphorylase;                                                                                                                                                                                                                                                                                                                                                           |
| N | O58358 | DE | Pantetheine-phosphate adenylyltransferase;                                                                                                                                                                                                                                                                                                                                                 |
| N | O58358 | DE | Phosphopantetheine adenylyltransferase;                                                                                                                                                                                                                                                                                                                                                    |
| N | O58358 | DR | coenzyme A biosynthetic process                                                                                                                                                                                                                                                                                                                                                            |
| N | O58358 | DR | pantetheine-phosphate adenylyltransferase activity                                                                                                                                                                                                                                                                                                                                         |
| N | O59182 | DE | UPF0189 protein PH1513;                                                                                                                                                                                                                                                                                                                                                                    |
| N | O59921 | DE | Alpha,alpha-trehalose-phosphate synthase [UDP-forming];                                                                                                                                                                                                                                                                                                                                    |
| N | O59921 | DE | Trehalose-6-phosphate synthase;                                                                                                                                                                                                                                                                                                                                                            |
| N | O59921 | DE | UDP-glucose-glucosephosphate glucosyltransferase;                                                                                                                                                                                                                                                                                                                                          |
| N | O59921 | DR | alpha,alpha-trehalose-phosphate synthase (UDP-forming) activity                                                                                                                                                                                                                                                                                                                            |
| N | O59921 | DR | trehalose biosynthetic process                                                                                                                                                                                                                                                                                                                                                             |
| N | O59922 | DE | PKA regulatory subunit;                                                                                                                                                                                                                                                                                                                                                                    |
| N | O59922 | DE | cAMP-dependent protein kinase regulatory subunit;                                                                                                                                                                                                                                                                                                                                          |
| N | O59922 | DR | cAMP-dependent protein kinase regulator activity                                                                                                                                                                                                                                                                                                                                           |
| N | O59922 | DR | regulation of protein phosphorylation                                                                                                                                                                                                                                                                                                                                                      |
| N | O60128 | DE | 40S ribosomal protein S3;                                                                                                                                                                                                                                                                                                                                                                  |
| N | O60128 | DR | structural constituent of ribosome                                                                                                                                                                                                                                                                                                                                                         |
| N | O60921 | CC | Component of the 9-1-1 cell-cycle checkpoint response complex that plays a major role in DNA repair                                                                                                                                                                                                                                                                                        |
| N | O60921 | CC | Acts then as a sliding clamp platform on DNA for several proteins involved in long-patch base excision repair (LP-BER)                                                                                                                                                                                                                                                                     |
| N | O60921 | CC | The 9-1-1 complex is recruited to DNA lesion upon damage by the RAD17-replication factor C (RFC) clamp loader complex                                                                                                                                                                                                                                                                      |
| N | O60921 | CC | The 9-1-1 complex stimulates DNA polymerase beta (POLB) activity by increasing its affinity for the 3'-OH end of the primer-template and stabilizes POLB to those sites where LP-BER proceeds; endonuclease FEN1 cleavage activity on substrates with double, nick, or gap flaps of distinct sequences and lengths; and DNA ligase I (LIG1) on long-patch base excision repair substrates. |
| N | O60921 | DE | Checkpoint protein HUS1;                                                                                                                                                                                                                                                                                                                                                                   |
| N | O60921 | DR | DNA damage checkpoint                                                                                                                                                                                                                                                                                                                                                                      |
| N | O60921 | DR | DNA replication                                                                                                                                                                                                                                                                                                                                                                            |
| N | O60921 | DR | protein binding                                                                                                                                                                                                                                                                                                                                                                            |
| N | O62643 | CC | May play a role in cell-cell or cell-ligand interactions during synaptogenesis and other events in the brain.                                                                                                                                                                                                                                                                              |
| N | O62643 | DE | Thy-1 antigen;                                                                                                                                                                                                                                                                                                                                                                             |
| N | O62643 | DE | Thy-1 membrane glycoprotein;                                                                                                                                                                                                                                                                                                                                                               |
| N | O62643 | DR | GPI anchor binding                                                                                                                                                                                                                                                                                                                                                                         |
| N | O62643 | DR | Rho GTPase activator activity                                                                                                                                                                                                                                                                                                                                                              |
| N | O62643 | DR | T cell receptor signaling pathway                                                                                                                                                                                                                                                                                                                                                          |
| N | O62643 | DR | cell-cell adhesion                                                                                                                                                                                                                                                                                                                                                                         |
| N | O62643 | DR | cytoskeleton organization                                                                                                                                                                                                                                                                                                                                                                  |
| N | O62643 | DR | focal adhesion assembly                                                                                                                                                                                                                                                                                                                                                                    |
| N | O62643 | DR | negative regulation of T cell receptor signaling pathway                                                                                                                                                                                                                                                                                                                                   |
| N | O62643 | DR | negative regulation of axonogenesis                                                                                                                                                                                                                                                                                                                                                        |
| N | O62643 | DR | negative regulation of cell migration                                                                                                                                                                                                                                                                                                                                                      |
| N | O62643 | DR | negative regulation of protein kinase activity                                                                                                                                                                                                                                                                                                                                             |
| N | O62643 | DR | positive regulation of GTPase activity                                                                                                                                                                                                                                                                                                                                                     |
| N | O62643 | DR | positive regulation of T cell activation                                                                                                                                                                                                                                                                                                                                                   |
| N | O62643 | DR | positive regulation of release of sequestered calcium ion into cytosol                                                                                                                                                                                                                                                                                                                     |
| N | O62643 | DR | retinal cone cell development                                                                                                                                                                                                                                                                                                                                                              |
| N | O65438 | DE | Cytochrome P450 71A27;                                                                                                                                                                                                                                                                                                                                                                     |
| N | O65438 | DR | electron carrier activity                                                                                                                                                                                                                                                                                                                                                                  |
| N | O65438 | DR | monooxygenase activity                                                                                                                                                                                                                                                                                                                                                                     |
| N | O65438 | DR | oxidation-reduction process                                                                                                                                                                                                                                                                                                                                                                |
| N | O65665 | CC | Probably acts as a transcriptional activator                                                                                                                                                                                                                                                                                                                                               |
| N | O65665 | CC | Binds to the GCC-box pathogenesis-related promoter element                                                                                                                                                                                                                                                                                                                                 |
| N | O65665 | CC | May be involved in the regulation of gene expression by stress factors and by components of stress signal transduction pathways (By similarity).                                                                                                                                                                                                                                           |

|   |        |    |                                                                                                                                                                                                                                                                                                                                                    |
|---|--------|----|----------------------------------------------------------------------------------------------------------------------------------------------------------------------------------------------------------------------------------------------------------------------------------------------------------------------------------------------------|
| N | O65665 | DE | Ethylene-responsive transcription factor ERF060;                                                                                                                                                                                                                                                                                                   |
| N | O65665 | DR | ethylene mediated signaling pathway                                                                                                                                                                                                                                                                                                                |
| N | O65665 | DR | regulation of transcription, DNA-dependent                                                                                                                                                                                                                                                                                                         |
| N | O65665 | DR | sequence-specific DNA binding transcription factor activity                                                                                                                                                                                                                                                                                        |
| N | O65806 | DE | Protein mago nashi homolog;                                                                                                                                                                                                                                                                                                                        |
| N | O66403 | CC | May function as an integrase.                                                                                                                                                                                                                                                                                                                      |
| N | O66403 | DE | Probable integrase/recombinase aq_aa09;                                                                                                                                                                                                                                                                                                            |
| N | O66403 | DR | DNA integration                                                                                                                                                                                                                                                                                                                                    |
| N | O66403 | DR | DNA recombination                                                                                                                                                                                                                                                                                                                                  |
| N | O66984 | DE | Uncharacterized protein aq_796;                                                                                                                                                                                                                                                                                                                    |
| N | O67064 | DE | Uncharacterized protein aq_919;                                                                                                                                                                                                                                                                                                                    |
| N | O67133 | CC | Probably plays a role in an hydrogenase nickel cofactor insertion step (By similarity)                                                                                                                                                                                                                                                             |
| N | O67133 | DE | Probable hydrogenase nickel incorporation protein hypA;                                                                                                                                                                                                                                                                                            |
| N | O67133 | DR | electron carrier activity                                                                                                                                                                                                                                                                                                                          |
| N | O67133 | DR | nickel ion binding                                                                                                                                                                                                                                                                                                                                 |
| N | O67133 | DR | protein modification process                                                                                                                                                                                                                                                                                                                       |
| N | O67438 | DE | Uncharacterized protein aq_1453;                                                                                                                                                                                                                                                                                                                   |
| N | O67631 | CC | Catalyzes the addition of meso-diaminopimelic acid to the nucleotide precursor UDP-N-acetylmuramoyl-L-alanyl-D-glutamate (UMAG) in the biosynthesis of bacterial cell-wall peptidoglycan (By similarity).                                                                                                                                          |
| N | O67631 | DE | Meso-A2pm-adding enzyme;                                                                                                                                                                                                                                                                                                                           |
| N | O67631 | DE | Meso-diaminopimelate-adding enzyme;                                                                                                                                                                                                                                                                                                                |
| N | O67631 | DE | UDP-MurNAc-L-Ala-D-Glu:meso-diaminopimelate ligase;                                                                                                                                                                                                                                                                                                |
| N | O67631 | DE | UDP-MurNAc-tripeptide synthetase;                                                                                                                                                                                                                                                                                                                  |
| N | O67631 | DE | UDP-N-acetylmuramoyl-L-alanyl-D-glutamate--2,6-diaminopimelate ligase;                                                                                                                                                                                                                                                                             |
| N | O67631 | DE | UDP-N-acetylmuramyl-tripeptide synthetase;                                                                                                                                                                                                                                                                                                         |
| N | O67631 | DR | UDP-N-acetylmuramoylalanyl-D-glutamate-2,6-diaminopimelate ligase activity                                                                                                                                                                                                                                                                         |
| N | O67631 | DR | cell division                                                                                                                                                                                                                                                                                                                                      |
| N | O67631 | DR | cellular cell wall organization                                                                                                                                                                                                                                                                                                                    |
| N | O67631 | DR | folic acid-containing compound biosynthetic process                                                                                                                                                                                                                                                                                                |
| N | O67631 | DR | peptidoglycan biosynthetic process                                                                                                                                                                                                                                                                                                                 |
| N | O67631 | DR | regulation of cell shape                                                                                                                                                                                                                                                                                                                           |
| N | O67631 | DR | tetrahydrofolylpolyglutamate synthase activity                                                                                                                                                                                                                                                                                                     |
| N | O67691 | DE | FGAM synthase II;                                                                                                                                                                                                                                                                                                                                  |
| N | O67691 | DE | Phosphoribosylformylglycinamide synthase 2;                                                                                                                                                                                                                                                                                                        |
| N | O67691 | DE | Phosphoribosylformylglycinamide synthase II;                                                                                                                                                                                                                                                                                                       |
| N | O67691 | DR | 'de novo' IMP biosynthetic process                                                                                                                                                                                                                                                                                                                 |
| N | O67691 | DR | phosphoribosylformylglycinamide synthase activity                                                                                                                                                                                                                                                                                                  |
| N | O68562 | CC | May have a structural role in maintaining the cell envelope integrity.                                                                                                                                                                                                                                                                             |
| N | O68562 | DE | Outer membrane lipoprotein omlA;                                                                                                                                                                                                                                                                                                                   |
| N | O69302 | CC | This protein is essential for replication of the chromosome                                                                                                                                                                                                                                                                                        |
| N | O69302 | CC | It is also involved in DNA recombination and repair (By similarity).                                                                                                                                                                                                                                                                               |
| N | O69302 | DE | Helix-destabilizing protein;                                                                                                                                                                                                                                                                                                                       |
| N | O69302 | DE | Single-stranded DNA-binding protein;                                                                                                                                                                                                                                                                                                               |
| N | O69302 | DR | DNA replication                                                                                                                                                                                                                                                                                                                                    |
| N | O69302 | DR | single-stranded DNA binding                                                                                                                                                                                                                                                                                                                        |
| N | O70445 | CC | Probable E3 ubiquitin-protein ligase                                                                                                                                                                                                                                                                                                               |
| N | O70445 | CC | Acts by mediating ubiquitin E3 ligase activity that is required for its tumor suppressor function                                                                                                                                                                                                                                                  |
| N | O70445 | CC | Also forms a heterodimer with CSTF1/CSTF-50 to modulate mRNA processing and RNAP II stability by inhibiting pre-mRNA 3' cleavage (By similarity).                                                                                                                                                                                                  |
| N | O70445 | CC | Plays a central role in the control of the cell cycle in response to DNA damage. The BRCA1-BARD1 heterodimer specifically mediates the formation of Lys-6-linked polyubiquitin chains and coordinates a diverse range of cellular pathways such as DNA damage repair, ubiquitination and transcriptional regulation to maintain genomic stability. |
| N | O70445 | CC | BRCA1-associated RING domain protein 1;                                                                                                                                                                                                                                                                                                            |
| N | O70445 | DE | negative regulation of apoptosis                                                                                                                                                                                                                                                                                                                   |
| N | O70445 | DR | negative regulation of protein export from nucleus                                                                                                                                                                                                                                                                                                 |
| N | O70445 | DR | positive regulation of apoptosis                                                                                                                                                                                                                                                                                                                   |
| N | O70445 | DR | protein K6-linked ubiquitination                                                                                                                                                                                                                                                                                                                   |
| N | O70445 | DR | protein heterodimerization activity                                                                                                                                                                                                                                                                                                                |
| N | O70445 | DR | protein homodimerization activity                                                                                                                                                                                                                                                                                                                  |
| N | O70445 | DR | regulation of phosphorylation                                                                                                                                                                                                                                                                                                                      |
| N | O70445 | DR | zinc ion binding                                                                                                                                                                                                                                                                                                                                   |

|   |        |    |                                                                                                                                                                                                           |
|---|--------|----|-----------------------------------------------------------------------------------------------------------------------------------------------------------------------------------------------------------|
| N | O70596 | CC | Inward rectifier potassium channels are characterized by a greater tendency to allow potassium to flow into the cell rather than out of it                                                                |
| N | O70596 | CC | KCNJ14 gives rise to low-conductance channels with a low affinity to the channel blockers Barium and Cesium.                                                                                              |
| N | O70596 | CC | The inward rectification is mainly due to the blockage of outward current by internal magnesium                                                                                                           |
| N | O70596 | CC | Their voltage dependence is regulated by the concentration of extracellular potassium; as external potassium is raised, the voltage range of the channel opening shifts to more positive voltages         |
| N | O70596 | DE | ATP-sensitive inward rectifier potassium channel 14;                                                                                                                                                      |
| N | O70596 | DE | Inward rectifier K(+) channel Kir2.4;                                                                                                                                                                     |
| N | O70596 | DE | Potassium channel, inwardly rectifying subfamily J member 14;                                                                                                                                             |
| N | O70596 | DR | inward rectifier potassium channel activity                                                                                                                                                               |
| N | O70900 | CC | Escorts unspliced or incompletely spliced viral pre- mRNAs (late transcripts) out of the nucleus of infected cells                                                                                        |
| N | O70900 | CC | Beside KPNB1, also seems to interact with TNPO1/Transportin-1, RANBP5/IPO5 and IPO7/RANBP7 for nuclear import                                                                                             |
| N | O70900 | CC | Conversion from Ran-GTP to Ran-GDP mediates dissociation of the Rev/RRE/XPO1/RAN complex, so that Rev can return to the nucleus for a subsequent round of export                                          |
| N | O70900 | CC | In the nucleus, the conversion from Ran-GDP to Ran-GTP dissociates Rev from KPNB1 and allows Rev's binding to the RRE in viral pre-mRNAs                                                                  |
| N | O70900 | CC | KPNB1 binds to the GDP bound form of RAN (Ran-GDP) and targets Rev to the nucleus                                                                                                                         |
| N | O70900 | CC | Rev can then form a complex with XPO1/CRM1 and Ran-GTP, leading to nuclear export of the complex                                                                                                          |
| N | O70900 | CC | Rev itself is translated from a fully spliced mRNA that readily exits the nucleus                                                                                                                         |
| N | O70900 | CC | Rev multimerization on the RRE via cooperative assembly exposes its nuclear export signal (NES) to the surface                                                                                            |
| N | O70900 | CC | Rev's nuclear localization signal (NLS) binds directly to KPNB1/Importin beta-1 without previous binding to KPNA1/Importin alpha-1                                                                        |
| N | O70900 | CC | The nucleoporin-like HRB/RIP is an essential cofactor that probably indirectly interacts with Rev to release HIV RNAs from the perinuclear region to the cytoplasm (By similarity).                       |
| N | O70900 | CC | These pre-mRNAs carry a recognition sequence called Rev responsive element (RRE) located in the env gene, that is not present in fully spliced viral mRNAs (early transcripts)                            |
| N | O70900 | CC | This function is essential since most viral proteins are translated from unspliced or partially spliced pre-mRNAs which cannot exit the nucleus by the pathway used by fully processed cellular mRNAs     |
| N | O70900 | DE | Anti-repression transactivator;                                                                                                                                                                           |
| N | O70900 | DE | Protein Rev;                                                                                                                                                                                              |
| N | O70900 | DE | Regulator of expression of viral proteins;                                                                                                                                                                |
| N | O70900 | DR | interspecies interaction between organisms                                                                                                                                                                |
| N | O70900 | DR | mRNA transport                                                                                                                                                                                            |
| N | O70900 | DR | regulation of transcription, DNA-dependent                                                                                                                                                                |
| N | O70900 | DR | sequence-specific DNA binding transcription factor activity                                                                                                                                               |
| N | O74524 | CC | Converts proline to delta-1-pyrroline-5-carboxylate (By similarity).                                                                                                                                      |
| N | O74524 | DE | Probable proline dehydrogenase, mitochondrial;                                                                                                                                                            |
| N | O74524 | DE | Probable proline oxidase;                                                                                                                                                                                 |
| N | O74524 | DR | glutamate biosynthetic process                                                                                                                                                                            |
| N | O74524 | DR | oxidation-reduction process                                                                                                                                                                               |
| N | O74524 | DR | proline catabolic process                                                                                                                                                                                 |
| N | O74524 | DR | proline dehydrogenase activity                                                                                                                                                                            |
| N | O74957 | CC | Required for G1 arrest and mating in response to nitrogen starvation                                                                                                                                      |
| N | O74957 | CC | A member of the RNA-induced transcriptional silencing (RITS) complex which is involved in the biosynthesis of dsRNA from primer siRNAs provided by the RNA-directed RNA polymerase (RDRC) complex         |
| N | O74957 | CC | A member of the argonaute siRNA chaperone (ARC) complex which is required for histone H3K9 methylation, heterochromatin assembly and siRNA generation                                                     |
| N | O74957 | CC | Ago1 regulation of cytokinesis and cell cycle checkpoints occurs downstream of Arc1                                                                                                                       |
| N | O74957 | CC | Has a role in the RNA interference (RNAi) pathway which is important for heterochromatin formation, accurate chromosome segregation, centromere cohesion and telomere function during mitosis and meiosis |

|   |        |    |                                                                                                                                                                                                                                                                             |
|---|--------|----|-----------------------------------------------------------------------------------------------------------------------------------------------------------------------------------------------------------------------------------------------------------------------------|
| N | O74957 | CC | Has ribonuclease H-like cleavage (slicing) activity towards target messages complementary to siRNA and can direct site-specific cleavage of RNA substrates via siRNA                                                                                                        |
| N | O74957 | CC | Promotes histone H3K9 methylation necessary for centromere function                                                                                                                                                                                                         |
| N | O74957 | CC | Required for recruitment of swi6 and cohesin to an ectopic dg repeat                                                                                                                                                                                                        |
| N | O74957 | CC | Required for silencing at the centromeres and for initiation of transcriptionally silent heterochromatin at the mating type locus                                                                                                                                           |
| N | O74957 | CC | Required, indirectly, for regulated hyperphosphorylation of cdc2                                                                                                                                                                                                            |
| N | O74957 | CC | Slicing activity is required for both post-transcriptional and transcriptional gene silencing as well as for histone H3 'Lys-10' methylation spreading, conversion of double-stranded siRNA to single-stranded siRNA and siRNA-dependent association of ago1 with chromatin |
| N | O74957 | CC | The ARC complex contains mostly double-stranded siRNA.                                                                                                                                                                                                                      |
| N | O74957 | DE | Cell cycle control protein ago1;                                                                                                                                                                                                                                            |
| N | O74957 | DE | Eukaryotic translation initiation factor 2C 2-like protein ago1;                                                                                                                                                                                                            |
| N | O74957 | DE | PAZ Piwi domain protein ago1;                                                                                                                                                                                                                                               |
| N | O74957 | DE | Protein argonaute;                                                                                                                                                                                                                                                          |
| N | O74957 | DE | Protein slicer;                                                                                                                                                                                                                                                             |
| N | O74957 | DE | RNA interference pathway protein ago1;                                                                                                                                                                                                                                      |
| N | O74957 | DR | chromatin silencing at centromere                                                                                                                                                                                                                                           |
| N | O74957 | DR | chromatin silencing by small RNA                                                                                                                                                                                                                                            |
| N | O74957 | DR | conversion of ds siRNA to ss siRNA involved in RNA interference                                                                                                                                                                                                             |
| N | O74957 | DR | mitotic sister chromatid segregation                                                                                                                                                                                                                                        |
| N | O74957 | DR | negative regulation of gene-specific transcription from RNA polymerase II promoter                                                                                                                                                                                          |
| N | O74957 | DR | nucleic acid binding                                                                                                                                                                                                                                                        |
| N | O74957 | DR | protein binding                                                                                                                                                                                                                                                             |
| N | O74957 | DR | regulation of chromatin silencing at centromere                                                                                                                                                                                                                             |
| N | O74957 | DR | regulation of histone H3-K9 methylation                                                                                                                                                                                                                                     |
| N | O74957 | DR | regulation of nitrogen utilization                                                                                                                                                                                                                                          |
| N | O75348 | CC | Catalytic subunit of the peripheral V1 complex of vacuolar ATPase (V-ATPase)                                                                                                                                                                                                |
| N | O75348 | CC | V-ATPase is responsible for acidifying a variety of intracellular compartments in eukaryotic cells.                                                                                                                                                                         |
| N | O75348 | DE | V-ATPase 13 kDa subunit 1;                                                                                                                                                                                                                                                  |
| N | O75348 | DE | V-ATPase subunit G 1;                                                                                                                                                                                                                                                       |
| N | O75348 | DE | V-type proton ATPase subunit G 1;                                                                                                                                                                                                                                           |
| N | O75348 | DE | Vacuolar proton pump subunit G 1;                                                                                                                                                                                                                                           |
| N | O75348 | DE | Vacuolar proton pump subunit M16;                                                                                                                                                                                                                                           |
| N | O75348 | DR | ATPase binding                                                                                                                                                                                                                                                              |
| N | O75348 | DR | cellular iron ion homeostasis                                                                                                                                                                                                                                               |
| N | O75348 | DR | insulin receptor signaling pathway                                                                                                                                                                                                                                          |
| N | O75348 | DR | transferrin transport                                                                                                                                                                                                                                                       |
| N | O75414 | CC | Major role in the synthesis of nucleoside triphosphates other than ATP                                                                                                                                                                                                      |
| N | O75414 | CC | Inhibitor of p53-induced apoptosis.                                                                                                                                                                                                                                         |
| N | O75414 | CC | The ATP gamma phosphate is transferred to the NDP beta phosphate via a ping-pong mechanism, using a phosphorylated active-site intermediate                                                                                                                                 |
| N | O75414 | DE | IPIA-alpha;                                                                                                                                                                                                                                                                 |
| N | O75414 | DE | Inhibitor of p53-induced apoptosis-alpha;                                                                                                                                                                                                                                   |
| N | O75414 | DE | NDP kinase 6;                                                                                                                                                                                                                                                               |
| N | O75414 | DE | Nucleoside diphosphate kinase 6;                                                                                                                                                                                                                                            |
| N | O75414 | DR | CTP biosynthetic process                                                                                                                                                                                                                                                    |
| N | O75414 | DR | GTP biosynthetic process                                                                                                                                                                                                                                                    |
| N | O75414 | DR | UTP biosynthetic process                                                                                                                                                                                                                                                    |
| N | O75414 | DR | anti-apoptosis                                                                                                                                                                                                                                                              |
| N | O75414 | DR | metal ion binding                                                                                                                                                                                                                                                           |
| N | O75414 | DR | negative regulation of cell growth                                                                                                                                                                                                                                          |
| N | O75414 | DR | negative regulation of mitosis                                                                                                                                                                                                                                              |
| N | O75414 | DR | nucleoside diphosphate kinase activity                                                                                                                                                                                                                                      |
| N | O77462 | CC | Conjugation of reduced glutathione to a wide number of exogenous and endogenous hydrophobic electrophiles (By similarity).                                                                                                                                                  |
| N | O77462 | DE | AgGst1-alpha;                                                                                                                                                                                                                                                               |
| N | O77462 | DE | GST class-theta;                                                                                                                                                                                                                                                            |
| N | O77462 | DE | Glutathione S-transferase 1, isoform A;                                                                                                                                                                                                                                     |
| N | O77462 | DR | glutathione metabolic process                                                                                                                                                                                                                                               |
| N | O77462 | DR | glutathione transferase activity                                                                                                                                                                                                                                            |

|   |        |    |                                                                                                                                                                                                                        |
|---|--------|----|------------------------------------------------------------------------------------------------------------------------------------------------------------------------------------------------------------------------|
| N | O78761 | CC | Component of the ubiquinol-cytochrome c reductase complex (complex III or cytochrome b-c1 complex), which is a respiratory chain that generates an electrochemical potential coupled to ATP synthesis (By similarity). |
| N | O78761 | DE | Complex III subunit 3;                                                                                                                                                                                                 |
| N | O78761 | DE | Complex III subunit III;                                                                                                                                                                                               |
| N | O78761 | DE | Cytochrome b-c1 complex subunit 3;                                                                                                                                                                                     |
| N | O78761 | DE | Cytochrome b;                                                                                                                                                                                                          |
| N | O78761 | DE | Ubiquinol-cytochrome-c reductase complex cytochrome b subunit;                                                                                                                                                         |
| N | O78761 | DR | electron carrier activity                                                                                                                                                                                              |
| N | O78761 | DR | metal ion binding                                                                                                                                                                                                      |
| N | O78761 | DR | oxidoreductase activity                                                                                                                                                                                                |
| N | O78761 | DR | respiratory electron transport chain                                                                                                                                                                                   |
| N | O78788 | CC | Component of the ubiquinol-cytochrome c reductase complex (complex III or cytochrome b-c1 complex), which is a respiratory chain that generates an electrochemical potential coupled to ATP synthesis (By similarity). |
| N | O78788 | DE | Complex III subunit 3;                                                                                                                                                                                                 |
| N | O78788 | DE | Complex III subunit III;                                                                                                                                                                                               |
| N | O78788 | DE | Cytochrome b-c1 complex subunit 3;                                                                                                                                                                                     |
| N | O78788 | DE | Cytochrome b;                                                                                                                                                                                                          |
| N | O78788 | DE | Ubiquinol-cytochrome-c reductase complex cytochrome b subunit;                                                                                                                                                         |
| N | O78788 | DR | electron carrier activity                                                                                                                                                                                              |
| N | O78788 | DR | metal ion binding                                                                                                                                                                                                      |
| N | O78788 | DR | oxidoreductase activity                                                                                                                                                                                                |
| N | O78788 | DR | respiratory electron transport chain                                                                                                                                                                                   |
| N | O80323 | CC | Self-incompatibility (SI) is the inherited ability of a flowering plant to prevent self-fertilization by discriminating between self and non-self pollen during                                                        |
| N | O80323 | CC | in many species, self-incompatibility is controlled by the single, multiallelic locus                                                                                                                                  |
| N | O80323 | DE | Ribonuclease S-3;                                                                                                                                                                                                      |
| N | O80323 | DR | ribonuclease T2 activity                                                                                                                                                                                               |
| N | O80568 | CC | Kinase that can phosphorylate various inositol polyphosphate such as Ins(3,4,5,6)P4 or Ins(1,3,4)P3                                                                                                                    |
| N | O80568 | CC | Also phosphorylates Ins(1,3,4)P3 on O-5 and O-6 to form Ins(1,3,4,6)P4, an essential molecule in the hexakisphosphate (InsP6) pathway (By similarity).                                                                 |
| N | O80568 | CC | Phosphorylates Ins(3,4,5,6)P4 at position 1 to form Ins(1,3,4,5,6)P5                                                                                                                                                   |
| N | O80568 | CC | This reaction is thought to have regulatory importance, since Ins(3,4,5,6)P4 is an inhibitor of plasma membrane Ca(2+)-activated Cl(-) channels, while Ins(1,3,4,5,6)P5 is not                                         |
| N | O80568 | DE | Inositol 1,3,4-trisphosphate 5/6-kinase 4;                                                                                                                                                                             |
| N | O80568 | DE | Inositol-tetrakisphosphate 1-kinase 4;                                                                                                                                                                                 |
| N | O80568 | DE | Inositol-triphosphate 5/6-kinase 4;                                                                                                                                                                                    |
| N | O80568 | DE | Ins(1,3,4)P(3) 5/6-kinase 4;                                                                                                                                                                                           |
| N | O80568 | DR | inositol tetrakisphosphate 1-kinase activity                                                                                                                                                                           |
| N | O80568 | DR | inositol trisphosphate metabolic process                                                                                                                                                                               |
| N | O80568 | DR | inositol-1,3,4-trisphosphate 5/6-kinase activity                                                                                                                                                                       |
| N | O80568 | DR | magnesium ion binding                                                                                                                                                                                                  |
| N | O81191 | CC | Catalyzes the formation of 1,8-cineole from geranyl diphosphate                                                                                                                                                        |
| N | O81191 | CC | The enzyme also produces significant amounts of (+)- and (-)-alpha-pinene, (+)- and (-)-beta-pinene, myrcene and (+)- sabinene.                                                                                        |
| N | O81191 | DE | 1,8-cineole synthase, chloroplastic;                                                                                                                                                                                   |
| N | O81191 | DR | lyase activity                                                                                                                                                                                                         |
| N | O81191 | DR | magnesium ion binding                                                                                                                                                                                                  |
| N | O81782 | DE | B3 domain-containing protein REM6;                                                                                                                                                                                     |
| N | O81782 | DE | Protein REPRODUCTIVE MERISTEM 6;                                                                                                                                                                                       |
| N | O81782 | DR | regulation of transcription, DNA-dependent                                                                                                                                                                             |
| N | O83005 | CC | The reaction center is a membrane-bound complex that mediates the initial photochemical event in the electron transfer process of photosynthesis.                                                                      |
| N | O83005 | DE | Photosynthetic reaction center L subunit;                                                                                                                                                                              |
| N | O83005 | DE | Reaction center protein L chain;                                                                                                                                                                                       |
| N | O83005 | DR | bacteriochlorophyll binding                                                                                                                                                                                            |
| N | O83005 | DR | electron transporter, transferring electrons within the cyclic electron transport pathway of photosynthesis activity                                                                                                   |
| N | O83005 | DR | metal ion binding                                                                                                                                                                                                      |
| N | O83005 | DR | photosynthetic electron transport in photosystem II                                                                                                                                                                    |
| N | O83005 | DR | protein-chromophore linkage                                                                                                                                                                                            |
| N | O83049 | CC | The recF protein is involved in DNA metabolism; it is required for DNA replication and normal SOS inducibility                                                                                                         |

|   |        |    |                                                                                                                                                                                                                                                                                                                                                   |
|---|--------|----|---------------------------------------------------------------------------------------------------------------------------------------------------------------------------------------------------------------------------------------------------------------------------------------------------------------------------------------------------|
| N | O83049 | CC | It also seems to bind ATP (By similarity).                                                                                                                                                                                                                                                                                                        |
| N | O83049 | CC | RecF binds preferentially to single-stranded, linear DNA                                                                                                                                                                                                                                                                                          |
| N | O83049 | DE | DNA replication and repair protein recF;                                                                                                                                                                                                                                                                                                          |
| N | O83049 | DR | DNA replication                                                                                                                                                                                                                                                                                                                                   |
| N | O83049 | DR | single-stranded DNA binding                                                                                                                                                                                                                                                                                                                       |
| N | O83273 | DE | Uncharacterized protein TP_0245;                                                                                                                                                                                                                                                                                                                  |
| N | O83500 | DE | Uncharacterized protein TP_0487;                                                                                                                                                                                                                                                                                                                  |
| N | O83682 | DE | Uncharacterized protein TP_0676;                                                                                                                                                                                                                                                                                                                  |
| N | O83767 | DE | Uncharacterized protein TP_0788;<br>This enzyme is involved in nucleotide metabolism: it produces dUMP, the immediate precursor of thymidine nucleotides and it decreases the intracellular concentration of dUTP so that uracil cannot be incorporated into DNA (By similarity)                                                                  |
| N | O84294 | CC |                                                                                                                                                                                                                                                                                                                                                   |
| N | O84294 | DE | Deoxyuridine 5'-triphosphate nucleotidohydrolase;                                                                                                                                                                                                                                                                                                 |
| N | O84294 | DE | dUTP pyrophosphatase;                                                                                                                                                                                                                                                                                                                             |
| N | O84294 | DR | dUTP diphosphatase activity                                                                                                                                                                                                                                                                                                                       |
| N | O84294 | DR | dUTP metabolic process                                                                                                                                                                                                                                                                                                                            |
| N | O84294 | DR | metal ion binding                                                                                                                                                                                                                                                                                                                                 |
| N | O86775 | DE | 50S ribosomal protein L17;                                                                                                                                                                                                                                                                                                                        |
| N | O86775 | DR | structural constituent of ribosome<br>required for the formation of a threonylcarbamoyl group on adenosine at position 37 (t(6)A37) in tRNAs that read codons beginning with adenine (By similarity)                                                                                                                                              |
| N | O86793 | CC |                                                                                                                                                                                                                                                                                                                                                   |
| N | O86793 | DE | Probable tRNA threonylcarbamoyladenosine biosynthesis protein Gcp;                                                                                                                                                                                                                                                                                |
| N | O86793 | DE | t(6)A37 threonylcarbamoyladenosine biosynthesis protein;                                                                                                                                                                                                                                                                                          |
| N | O86793 | DR | metal ion binding                                                                                                                                                                                                                                                                                                                                 |
| N | O86793 | DR | metalloendopeptidase activity<br>DNA gyrase negatively supercoils closed circular double-stranded DNA in an ATP-dependent manner and also catalyzes the interconversion of other topological isomers of double-stranded DNA rings, including catenanes and knotted rings                                                                          |
| N | O87545 | CC |                                                                                                                                                                                                                                                                                                                                                   |
| N | O87545 | DE | DNA gyrase subunit B;                                                                                                                                                                                                                                                                                                                             |
| N | O87545 | DR | DNA topoisomerase (ATP-hydrolyzing) activity                                                                                                                                                                                                                                                                                                      |
| N | O87545 | DR | DNA topological change                                                                                                                                                                                                                                                                                                                            |
| N | O87786 | CC | May help in the organization of the psaL subunit.                                                                                                                                                                                                                                                                                                 |
| N | O87786 | DE | Photosystem I reaction center subunit VIII;                                                                                                                                                                                                                                                                                                       |
| N | O87786 | DR | photosynthesis                                                                                                                                                                                                                                                                                                                                    |
| N | O88428 | CC | Bifunctional enzyme with both ATP sulfurylase and APS kinase activity, which mediates two steps in the sulfate activation pathway                                                                                                                                                                                                                 |
| N | O88428 | CC | In mammals, PAPS is the sole source of sulfate; APS appears to be only an intermediate in the sulfate-activation pathway                                                                                                                                                                                                                          |
| N | O88428 | CC | May have a important role in skeletogenesis during postnatal growth.<br>The first step is the transfer of a sulfate group to ATP to yield adenosine 5'-phosphosulfate (APS), and the second step is the transfer of a phosphate group from ATP to APS yielding 3'-phosphoadenylylsulfate (PAPS: activated sulfate donor used by sulfotransferase) |
| N | O88428 | DE | 3'-phosphoadenosine-5'-phosphosulfate synthase;                                                                                                                                                                                                                                                                                                   |
| N | O88428 | DE | APS kinase;                                                                                                                                                                                                                                                                                                                                       |
| N | O88428 | DE | ATP-sulfurylase;                                                                                                                                                                                                                                                                                                                                  |
| N | O88428 | DE | Adenosine-5'-phosphosulfate 3'-phosphotransferase;                                                                                                                                                                                                                                                                                                |
| N | O88428 | DE | Adenylyl-sulfate kinase;                                                                                                                                                                                                                                                                                                                          |
| N | O88428 | DE | Adenylylsulfate 3'-phosphotransferase;                                                                                                                                                                                                                                                                                                            |
| N | O88428 | DE | Bifunctional 3'-phosphoadenosine 5'-phosphosulfate synthase 2;                                                                                                                                                                                                                                                                                    |
| N | O88428 | DE | PAPS synthase 2;                                                                                                                                                                                                                                                                                                                                  |
| N | O88428 | DE | Sulfate adenylate transferase;                                                                                                                                                                                                                                                                                                                    |
| N | O88428 | DE | Sulfate adenylyltransferase;                                                                                                                                                                                                                                                                                                                      |
| N | O88428 | DE | Sulfurylase kinase 2;                                                                                                                                                                                                                                                                                                                             |
| N | O88428 | DR | adenylylsulfate kinase activity                                                                                                                                                                                                                                                                                                                   |
| N | O88428 | DR | blood coagulation                                                                                                                                                                                                                                                                                                                                 |
| N | O88428 | DR | bone development                                                                                                                                                                                                                                                                                                                                  |
| N | O88428 | DR | sulfate adenylyltransferase (ATP) activity                                                                                                                                                                                                                                                                                                        |
| N | O88428 | DR | sulfate assimilation                                                                                                                                                                                                                                                                                                                              |
| N | O88487 | CC | Acts as one of several non-catalytic accessory components of the cytoplasmic dynein 1 complex that are thought to be involved in linking dynein to cargos and to adapter proteins that regulate dynein function                                                                                                                                   |
| N | O88487 | CC | Cytoplasmic dynein 1 acts as a motor for the intracellular retrograde motility of vesicles and organelles along microtubules                                                                                                                                                                                                                      |

|   |        |    |                                                                                                                                                                                                                                                                                                |
|---|--------|----|------------------------------------------------------------------------------------------------------------------------------------------------------------------------------------------------------------------------------------------------------------------------------------------------|
| N | O88487 | CC | Involved in membrane-transport, such as Golgi apparatus, late endosomes and lysosomes (By similarity).                                                                                                                                                                                         |
| N | O88487 | CC | The intermediate chains mediate the binding of dynein to dynactin via its 150 kDa component (p150- glued) DCNT1                                                                                                                                                                                |
| N | O88487 | DE | Cytoplasmic dynein 1 intermediate chain 2;                                                                                                                                                                                                                                                     |
| N | O88487 | DE | Cytoplasmic dynein intermediate chain 2;                                                                                                                                                                                                                                                       |
| N | O88487 | DE | Dynein intermediate chain 2, cytosolic;                                                                                                                                                                                                                                                        |
| N | O88487 | DR | motor activity                                                                                                                                                                                                                                                                                 |
| N | O88545 | CC | Component of the COP9 signalosome complex (CSN), a complex involved in various cellular and developmental processes                                                                                                                                                                            |
| N | O88545 | CC | CSN-dependent phosphorylation of TP53 and JUN promotes and protects degradation by the Ubl system, respectively                                                                                                                                                                                |
| N | O88545 | CC | Has some glucocorticoid receptor- responsive activity (By similarity).                                                                                                                                                                                                                         |
| N | O88545 | CC | The CSN complex is an essential regulator of the ubiquitin (Ubl) conjugation pathway by mediating the deneddylation of the cullin subunits of SCF-type E3 ligase complexes, leading to decrease the Ubl ligase activity of SCF-type complexes such as SCF, CSA or DDB2                         |
| N | O88545 | CC | The complex is also involved in phosphorylation of p53/TP53, c-jun/JUN, IkbapBalpha/NFKBIA, ITPK1 and IRF8, possibly via its association with CK2 and PKD kinases                                                                                                                              |
| N | O88545 | DE | COP9 signalosome complex subunit 6;                                                                                                                                                                                                                                                            |
| N | O88545 | DE | JAB1-containing signalosome subunit 6;                                                                                                                                                                                                                                                         |
| N | O88545 | DE | Signalosome subunit 6;                                                                                                                                                                                                                                                                         |
| N | O88545 | DR | protein binding                                                                                                                                                                                                                                                                                |
| N | O88741 | CC | May function in a signal transduction pathway responsible for ganglioside-induced neurite differentiation                                                                                                                                                                                      |
| N | O88741 | CC | May also have a role in protecting myelin membranes against free radical-mediated damage.                                                                                                                                                                                                      |
| N | O88741 | DE | Ganglioside-induced differentiation-associated protein 1;                                                                                                                                                                                                                                      |
| N | O88741 | DR | response to retinoic acid                                                                                                                                                                                                                                                                      |
| N | O89039 | CC | Receptor for CXCL12/SDF1 (By similarity).                                                                                                                                                                                                                                                      |
| N | O89039 | DE | C-X-C chemokine receptor type 7;                                                                                                                                                                                                                                                               |
| N | O89039 | DE | Chemokine orphan receptor 1;                                                                                                                                                                                                                                                                   |
| N | O89039 | DE | G-protein coupled receptor RDC1 homolog;                                                                                                                                                                                                                                                       |
| N | O89039 | DR | G-protein coupled receptor activity                                                                                                                                                                                                                                                            |
| N | O89042 | CC | Plays an essential role in the initiation of DNA replication                                                                                                                                                                                                                                   |
| N | O89042 | CC | During the S phase of the cell cycle, the DNA polymerase alpha complex (composed of a catalytic subunit POLA1/p180, a regulatory subunit POLA2/p70 and two primase subunits PRIM1/p49 and PRIM2/p58) is recruited to DNA at the replicative forks via direct interactions with MCM10 and WDHD1 |
| N | O89042 | CC | The primase subunit of the polymerase alpha complex initiates DNA synthesis by oligomerising short RNA primers on both leading and lagging strands                                                                                                                                             |
| N | O89042 | CC | The reason this transfer occurs is because the polymerase alpha has limited processivity and lacks intrinsic 3' exonuclease activity for proofreading error, and therefore is not well suited for replicating long complexes (By similarity).                                                  |
| N | O89042 | CC | These primers are initially extended by the polymerase alpha catalytic subunit and subsequently transferred to polymerase delta and polymerase epsilon for processive synthesis on the lagging and leading strand, respectively                                                                |
| N | O89042 | DE | DNA polymerase alpha catalytic subunit p180;                                                                                                                                                                                                                                                   |
| N | O89042 | DE | DNA polymerase alpha catalytic subunit;                                                                                                                                                                                                                                                        |
| N | O89042 | DR | DNA-dependent DNA replication initiation                                                                                                                                                                                                                                                       |
| N | O89042 | DR | DNA-directed DNA polymerase activity                                                                                                                                                                                                                                                           |
| N | O89042 | DR | S phase of mitotic cell cycle                                                                                                                                                                                                                                                                  |
| N | O89042 | DR | cell proliferation                                                                                                                                                                                                                                                                             |
| N | O89042 | DR | chromatin binding                                                                                                                                                                                                                                                                              |
| N | O89042 | DR | double-strand break repair via nonhomologous end joining                                                                                                                                                                                                                                       |
| N | O89042 | DR | double-stranded DNA binding                                                                                                                                                                                                                                                                    |
| N | O89042 | DR | lagging strand elongation                                                                                                                                                                                                                                                                      |
| N | O89042 | DR | leading strand elongation                                                                                                                                                                                                                                                                      |
| N | O89042 | DR | metal ion binding                                                                                                                                                                                                                                                                              |
| N | O89042 | DR | nucleoside binding                                                                                                                                                                                                                                                                             |
| N | O89042 | DR | purine nucleotide binding                                                                                                                                                                                                                                                                      |
| N | O89042 | DR | pyrimidine nucleotide binding                                                                                                                                                                                                                                                                  |
| N | O93512 | CC | Receptor for persephin                                                                                                                                                                                                                                                                         |

|   |        |    |                                                                                                                                                                                                                        |
|---|--------|----|------------------------------------------------------------------------------------------------------------------------------------------------------------------------------------------------------------------------|
| N | O93512 | CC | Mediates the GDNF-induced autophosphorylation and activation of the RET receptor (By similarity).                                                                                                                      |
| N | O93512 | DE | GDNF family receptor alpha-4;                                                                                                                                                                                          |
| N | O93512 | DE | GDNF receptor alpha-4;                                                                                                                                                                                                 |
| N | O93512 | DE | GDNFR-alpha-4;                                                                                                                                                                                                         |
| N | O93512 | DE | GFR-alpha-4;                                                                                                                                                                                                           |
| N | O93512 | DR | receptor activity                                                                                                                                                                                                      |
| N | O93533 | CC | One gap junction consists of a cluster of closely packed pairs of transmembrane channels, the connexons, through which materials of low MW diffuse from one cell to a neighboring cell (By similarity).                |
| N | O93533 | DE | Connexin-31;                                                                                                                                                                                                           |
| N | O93533 | DE | Gap junction beta-6 protein;                                                                                                                                                                                           |
| N | O93533 | DR | cell communication                                                                                                                                                                                                     |
| N | O93533 | DR | sensory perception of sound                                                                                                                                                                                            |
| N | O93655 | CC | Proteases F1, F2 and F3 degrade oligopeptides produced by Tricorn (themselves probably produced by the proteasome), yielding free amino acids.                                                                         |
| N | O93655 | DE | Tricorn protease-interacting factor F3;                                                                                                                                                                                |
| N | O93655 | DR | aminopeptidase activity                                                                                                                                                                                                |
| N | O93655 | DR | metallopeptidase activity                                                                                                                                                                                              |
| N | O93655 | DR | zinc ion binding                                                                                                                                                                                                       |
| N | O94221 | CC | Hydrolyzes a variety of simple alpha-D-galactoside as well as more complex molecules such as oligosaccharides and polysaccharides (By similarity).                                                                     |
| N | O94221 | DE | Melibiase B;                                                                                                                                                                                                           |
| N | O94221 | DE | Probable alpha-galactosidase B;                                                                                                                                                                                        |
| N | O94221 | DR | alpha-galactosidase activity                                                                                                                                                                                           |
| N | O94221 | DR | carbohydrate metabolic process                                                                                                                                                                                         |
| N | O94221 | DR | cation binding                                                                                                                                                                                                         |
| N | O94242 | DE | Aspartate--tRNA ligase;                                                                                                                                                                                                |
| N | O94242 | DE | Aspartyl-tRNA synthetase, mitochondrial;                                                                                                                                                                               |
| N | O94242 | DR | aspartate-tRNA ligase activity                                                                                                                                                                                         |
| N | O94242 | DR | aspartyl-tRNA aminoacylation                                                                                                                                                                                           |
| N | O94242 | DR | mitochondrial translation                                                                                                                                                                                              |
| N | O94488 | CC | Required for cytoplasmic astral microtubule growth during mitosis                                                                                                                                                      |
| N | O94488 | CC | Involved in localizing components of the gamma- tubulin complex to the non-spindle pole body (non-SPB) microtubule organizing centers (MTOCs)                                                                          |
| N | O94488 | CC | Required for new microtubule nucleation from non-SPB sites during interphase.                                                                                                                                          |
| N | O94488 | DE | Microtubule organizer protein 1;                                                                                                                                                                                       |
| N | O94488 | DE | Morphology defective protein 20;                                                                                                                                                                                       |
| N | O94488 | DR | calmodulin binding                                                                                                                                                                                                     |
| N | O94488 | DR | establishment of nucleus localization                                                                                                                                                                                  |
| N | O94488 | DR | gamma-tubulin binding                                                                                                                                                                                                  |
| N | O94488 | DR | gamma-tubulin complex localization                                                                                                                                                                                     |
| N | O94488 | DR | interphase microtubule nucleation by interphase microtubule organizing center                                                                                                                                          |
| N | O94488 | DR | spindle astral microtubule organization                                                                                                                                                                                |
| N | O94504 | CC | Able to function as a protein disulfide reductase                                                                                                                                                                      |
| N | O94504 | CC | Involved in the response to oxidative stress.                                                                                                                                                                          |
| N | O94504 | DE | Thioredoxin-2, mitochondrial;                                                                                                                                                                                          |
| N | O94504 | DR | arginine biosynthetic process via ornithine                                                                                                                                                                            |
| N | O94504 | DR | cell redox homeostasis                                                                                                                                                                                                 |
| N | O94504 | DR | cellular response to reactive oxygen species                                                                                                                                                                           |
| N | O94504 | DR | electron carrier activity                                                                                                                                                                                              |
| N | O94504 | DR | electron transport chain                                                                                                                                                                                               |
| N | O94504 | DR | glycerol ether metabolic process                                                                                                                                                                                       |
| N | O94504 | DR | protein binding                                                                                                                                                                                                        |
| N | O94504 | DR | protein disulfide oxidoreductase activity                                                                                                                                                                              |
| N | O94597 | DE | Putative uncharacterized membrane protein C622.07;                                                                                                                                                                     |
| N | O94609 | CC | Activates ubiquitin by first adenylating its C-terminal glycine residue with ATP, and thereafter linking this residue to the side chain of a cysteine residue in E1, yielding an ubiquitin- E1 thioester and free AMP. |
| N | O94609 | DE | Poly(A)+ RNA transport protein 3;                                                                                                                                                                                      |
| N | O94609 | DE | Ubiquitin-activating enzyme E1 1;                                                                                                                                                                                      |
| N | O94609 | DR | ligase activity                                                                                                                                                                                                        |
| N | O94609 | DR | mRNA export from nucleus                                                                                                                                                                                               |
| N | O94609 | DR | protein modification process                                                                                                                                                                                           |
| N | O94609 | DR | small protein activating enzyme activity                                                                                                                                                                               |



|   |        |    |                                                                                                                                                                                                                            |
|---|--------|----|----------------------------------------------------------------------------------------------------------------------------------------------------------------------------------------------------------------------------|
| N | O94731 | CC | Component of the TRAPP I and TRAPP II complexes                                                                                                                                                                            |
| N | O94731 | CC | Has a role late in meiosis following DNA replication (By similarity).                                                                                                                                                      |
| N | O94731 | CC | TRAPP I plays a key role in the late stages of endoplasmic reticulum to Golgi transport.                                                                                                                                   |
| N | O94731 | CC | TRAPP II seems to play a role in intra-Golgi transport                                                                                                                                                                     |
| N | O94731 | DE | TRAPP subunit trs85-1;                                                                                                                                                                                                     |
| N | O94731 | DE | Transport protein particle subunit trs85-1;                                                                                                                                                                                |
| N | O94731 | DR | intracellular protein transport                                                                                                                                                                                            |
| N | O94731 | DR | vesicle-mediated transport                                                                                                                                                                                                 |
| N | O95479 | CC | Oxidizes glucose-6-phosphate and glucose, as well as other hexose-6-phosphates                                                                                                                                             |
| N | O95479 | DE | 6-phosphogluconolactonase;                                                                                                                                                                                                 |
| N | O95479 | DE | GDH/6PGL endoplasmic bifunctional protein;                                                                                                                                                                                 |
| N | O95479 | DE | Glucose 1-dehydrogenase;                                                                                                                                                                                                   |
| N | O95479 | DE | Hexose-6-phosphate dehydrogenase;                                                                                                                                                                                          |
| N | O95479 | DR | 6-phosphogluconolactonase activity                                                                                                                                                                                         |
| N | O95479 | DR | glucose 1-dehydrogenase [NAD(P)] activity                                                                                                                                                                                  |
| N | O95479 | DR | glucose-6-phosphate dehydrogenase activity                                                                                                                                                                                 |
| N | O95989 | CC | Cleaves a beta-phosphate from the diphosphate groups in PP-InsP5 (diphosphoinositol pentakisphosphate) and [PP]2-InsP4 (bisdiphosphoinositol tetrakisphosphate), suggesting that it may play a role in signal transduction |
| N | O95989 | CC | Acts as a negative regulator of the ERK1/2 pathway                                                                                                                                                                         |
| N | O95989 | CC | Also able to catalyze the hydrolysis of dinucleoside oligophosphates, with Ap6A and Ap5A being the preferred substrates                                                                                                    |
| N | O95989 | CC | Also able to hydrolyze 5- phosphoribose 1-diphosphate.                                                                                                                                                                     |
| N | O95989 | CC | InsP6 (inositol hexakisphosphate) is not a substrate                                                                                                                                                                       |
| N | O95989 | CC | The major reaction products are ADP and p4a from Ap6A and ADP and ATP from Ap5A                                                                                                                                            |
| N | O95989 | DE | Diadenosine 5',5'''-P1,P6-hexaphosphate hydrolase 1;                                                                                                                                                                       |
| N | O95989 | DE | Diphosphoinositol polyphosphate phosphohydrolase 1;                                                                                                                                                                        |
| N | O95989 | DE | Nucleoside diphosphate-linked moiety X motif 3;                                                                                                                                                                            |
| N | O95989 | DE | Nudix motif 3;                                                                                                                                                                                                             |
| N | O95989 | DR | cell-cell signaling                                                                                                                                                                                                        |
| N | O95989 | DR | diadenosine polyphosphate catabolic process                                                                                                                                                                                |
| N | O95989 | DR | diphosphoinositol polyphosphate catabolic process                                                                                                                                                                          |
| N | O95989 | DR | diphosphoinositol-polyphosphate diphosphatase activity                                                                                                                                                                     |
| N | O95989 | DR | magnesium ion binding                                                                                                                                                                                                      |
| N | O98691 | CC | NDH shuttles electrons from NAD(P)H:plastoquinone, via FMN and iron-sulfur (Fe-S) centers, to quinones in the photosynthetic chain and possibly in a chloroplast respiratory chain                                         |
| N | O98691 | CC | Couples the redox reaction to proton translocation, and thus conserves the redox energy in a proton gradient (By similarity).                                                                                              |
| N | O98691 | CC | The immediate electron acceptor for the enzyme in this species is believed to be plastoquinone                                                                                                                             |
| N | O98691 | DE | NAD(P)H dehydrogenase subunit H;                                                                                                                                                                                           |
| N | O98691 | DE | NAD(P)H-quinone oxidoreductase subunit H, chloroplastic;                                                                                                                                                                   |
| N | O98691 | DE | NADH-plastoquinone oxidoreductase 49 kDa subunit;                                                                                                                                                                          |
| N | O98691 | DE | NADH-plastoquinone oxidoreductase subunit H;                                                                                                                                                                               |
| N | O98691 | DR | oxidation-reduction process                                                                                                                                                                                                |
| N | O98691 | DR | oxidoreductase activity, acting on NADH or NADPH                                                                                                                                                                           |
| N | O98691 | DR | quinone binding                                                                                                                                                                                                            |
| N | O98948 | CC | RuBisCO catalyzes two reactions: the carboxylation of D- ribulose 1,5-bisphosphate, the primary event in carbon dioxide fixation, as well as the oxidative fragmentation of the pentose substrate                          |
| N | O98948 | CC | Both reactions occur simultaneously and in competition at the same active site (By similarity).                                                                                                                            |
| N | O98948 | DE | Ribulose bisphosphate carboxylase small chain;                                                                                                                                                                             |
| N | O98948 | DE | RuBisCO small subunit;                                                                                                                                                                                                     |
| N | O98948 | DR | monooxygenase activity                                                                                                                                                                                                     |
| N | O98948 | DR | oxidation-reduction process                                                                                                                                                                                                |
| N | O98948 | DR | photorespiration                                                                                                                                                                                                           |
| N | O98948 | DR | reductive pentose-phosphate cycle                                                                                                                                                                                          |
| N | O98948 | DR | ribulose-bisphosphate carboxylase activity                                                                                                                                                                                 |
| N | P00197 | CC | Ferredoxins are iron-sulfur proteins that transfer electrons in a wide variety of metabolic reactions.                                                                                                                     |
| N | P00197 | DR | 4 iron, 4 sulfur cluster binding                                                                                                                                                                                           |
| N | P00197 | DR | electron carrier activity                                                                                                                                                                                                  |

|   |        |    |                                                                                                                                                                                          |
|---|--------|----|------------------------------------------------------------------------------------------------------------------------------------------------------------------------------------------|
| N | P00197 | DR | electron transport chain                                                                                                                                                                 |
| N | P00197 | DR | metal ion binding                                                                                                                                                                        |
| N | P00208 | CC | Ferredoxins are iron-sulfur proteins that transfer electrons in a wide variety of metabolic reactions.                                                                                   |
| N | P00208 | DR | 4 iron, 4 sulfur cluster binding                                                                                                                                                         |
| N | P00208 | DR | electron carrier activity                                                                                                                                                                |
| N | P00208 | DR | electron transport chain                                                                                                                                                                 |
| N | P00208 | DR | metal ion binding                                                                                                                                                                        |
| N | P00209 | CC | Ferredoxins are iron-sulfur proteins that transfer electrons in a wide variety of metabolic reactions.                                                                                   |
| N | P00209 | DE | Ferredoxin II;                                                                                                                                                                           |
| N | P00209 | DE | Ferredoxin-2;                                                                                                                                                                            |
| N | P00209 | DR | 3 iron, 4 sulfur cluster binding                                                                                                                                                         |
| N | P00209 | DR | electron carrier activity                                                                                                                                                                |
| N | P00209 | DR | electron transport chain                                                                                                                                                                 |
| N | P00209 | DR | iron ion binding                                                                                                                                                                         |
| N | P00347 | CC | This transmembrane glycoprotein is involved in the control of cholesterol biosynthesis.                                                                                                  |
| N | P00347 | CC | It is the rate-limiting enzyme of sterol biosynthesis.                                                                                                                                   |
| N | P00347 | DE | 3-hydroxy-3-methylglutaryl-coenzyme A reductase;                                                                                                                                         |
| N | P00347 | DE | HMG-CoA reductase;                                                                                                                                                                       |
| N | P00347 | DR | cholesterol biosynthetic process                                                                                                                                                         |
| N | P00347 | DR | coenzyme A metabolic process                                                                                                                                                             |
| N | P00347 | DR | hydroxymethylglutaryl-CoA reductase (NADPH) activity                                                                                                                                     |
| N | P00347 | DR | isoprenoid biosynthetic process                                                                                                                                                          |
| N | P00347 | DR | oxidation-reduction process                                                                                                                                                              |
| N | P00389 | CC | This enzyme is required for electron transfer from NADP to cytochrome P450 in microsomes                                                                                                 |
| N | P00389 | CC | It can also provide electron transfer to heme oxygenase and cytochrome B5.                                                                                                               |
| N | P00389 | DE | NADPH--cytochrome P450 reductase;                                                                                                                                                        |
| N | P00389 | DR | NADPH-hemoprotein reductase activity                                                                                                                                                     |
| N | P00389 | DR | iron ion binding                                                                                                                                                                         |
| N | P00389 | DR | oxidation-reduction process                                                                                                                                                              |
| N | P00602 | CC | PA2 catalyzes the calcium-dependent hydrolysis of the 2- acyl groups in 3-sn-phosphoglycerides.                                                                                          |
| N | P00602 | DE | Phosphatidylcholine 2-acylhydrolase;                                                                                                                                                     |
| N | P00602 | DE | Phospholipase A2 isozyme CM-I;                                                                                                                                                           |
| N | P00602 | DR | calcium ion binding                                                                                                                                                                      |
| N | P00602 | DR | lipid catabolic process                                                                                                                                                                  |
| N | P00602 | DR | phospholipase A2 activity                                                                                                                                                                |
| N | P00602 | DR | phospholipid metabolic process                                                                                                                                                           |
| N | P00835 | CC | Produces ATP from ADP in the presence of a proton gradient across the membrane.                                                                                                          |
| N | P00835 | DE | ATP synthase F1 sector epsilon subunit;                                                                                                                                                  |
| N | P00835 | DE | ATP synthase epsilon chain, chloroplastic;                                                                                                                                               |
| N | P00835 | DE | F-ATPase epsilon subunit;                                                                                                                                                                |
| N | P00835 | DR | ATP synthesis coupled proton transport                                                                                                                                                   |
| N | P00835 | DR | hydrogen ion transporting ATP synthase activity, rotational mechanism                                                                                                                    |
| N | P00835 | DR | proton-transporting ATPase activity, rotational mechanism                                                                                                                                |
| N | P00902 | DE | Anthrnilate synthase component 2;                                                                                                                                                        |
| N | P00902 | DE | Anthrnilate synthase component II;                                                                                                                                                       |
| N | P00902 | DE | Glutamine amido-transferase;                                                                                                                                                             |
| N | P00902 | DR | anthranilate synthase activity                                                                                                                                                           |
| N | P00902 | DR | glutamine metabolic process                                                                                                                                                              |
| N | P00902 | DR | tryptophan biosynthetic process                                                                                                                                                          |
| N | P01134 | CC | TGF alpha is a mitogenic polypeptide that is able to bind to the EGF receptor and to act synergistically with TGF beta to promote anchorage-independent cell proliferation in soft agar. |
| N | P01134 | DE | EGF-like TGF;                                                                                                                                                                            |
| N | P01134 | DE | Protransforming growth factor alpha;                                                                                                                                                     |
| N | P01134 | DE | TGF type 1;                                                                                                                                                                              |
| N | P01134 | DE | TGF-alpha;                                                                                                                                                                               |
| N | P01134 | DE | Transforming growth factor alpha;                                                                                                                                                        |
| N | P01134 | DR | MAP kinase kinase activity                                                                                                                                                               |
| N | P01134 | DR | activation of MAPK activity                                                                                                                                                              |
| N | P01134 | DR | anti-apoptosis                                                                                                                                                                           |
| N | P01134 | DR | cytosolic calcium ion homeostasis                                                                                                                                                        |

|   |        |    |                                                                                                                                                                                               |
|---|--------|----|-----------------------------------------------------------------------------------------------------------------------------------------------------------------------------------------------|
| N | P01134 | DR | epidermal growth factor receptor binding                                                                                                                                                      |
| N | P01134 | DR | epidermal growth factor receptor signaling pathway                                                                                                                                            |
| N | P01134 | DR | growth factor activity                                                                                                                                                                        |
| N | P01134 | DR | negative regulation of neuron apoptosis                                                                                                                                                       |
| N | P01134 | DR | neuroprotection                                                                                                                                                                               |
| N | P01134 | DR | positive regulation of cell division                                                                                                                                                          |
| N | P01134 | DR | positive regulation of epidermal growth factor receptor activity                                                                                                                              |
| N | P01134 | DR | positive regulation of epithelial cell proliferation                                                                                                                                          |
| N | P01134 | DR | positive regulation of mitosis                                                                                                                                                                |
| N | P01134 | DR | positive regulation of protein phosphorylation                                                                                                                                                |
| N | P01134 | DR | response to drug                                                                                                                                                                              |
| N | P01134 | DR | wound healing                                                                                                                                                                                 |
| N | P01161 | CC | Hormone playing a key role in cardiovascular homeostasis through regulation of natriuresis, diuresis, and vasodilatation                                                                      |
| N | P01161 | CC | Binds the clearance receptor NPR3 (By similarity).                                                                                                                                            |
| N | P01161 | CC | Specifically binds and stimulates the cGMP production of the NPR1 receptor                                                                                                                    |
| N | P01161 | DE | Atrial natriuretic factor;                                                                                                                                                                    |
| N | P01161 | DE | Atrial natriuretic peptide;                                                                                                                                                                   |
| N | P01161 | DE | Atriopeptin I;                                                                                                                                                                                |
| N | P01161 | DE | Atriopeptin II;                                                                                                                                                                               |
| N | P01161 | DE | Atriopeptin III;                                                                                                                                                                              |
| N | P01161 | DE | Atriopeptin-1;                                                                                                                                                                                |
| N | P01161 | DE | Atriopeptin-2;                                                                                                                                                                                |
| N | P01161 | DE | Atriopeptin-3;                                                                                                                                                                                |
| N | P01161 | DE | Auriculin-A;                                                                                                                                                                                  |
| N | P01161 | DE | Auriculin-B;                                                                                                                                                                                  |
| N | P01161 | DE | Prepronatriodilatin;                                                                                                                                                                          |
| N | P01161 | DR | cGMP biosynthetic process                                                                                                                                                                     |
| N | P01161 | DR | hormone activity                                                                                                                                                                              |
| N | P01161 | DR | multicellular organismal water homeostasis                                                                                                                                                    |
| N | P01161 | DR | negative regulation of cell growth                                                                                                                                                            |
| N | P01161 | DR | peptide hormone receptor binding                                                                                                                                                              |
| N | P01161 | DR | receptor guanylyl cyclase signaling pathway                                                                                                                                                   |
| N | P01161 | DR | regulation of blood pressure                                                                                                                                                                  |
| N | P01161 | DR | regulation of blood vessel size                                                                                                                                                               |
| N | P01161 | DR | regulation of vasodilation                                                                                                                                                                    |
| N | P01161 | DR | response to insulin stimulus                                                                                                                                                                  |
| N | P01182 | CC | Neurophysin 2 specifically binds the midbrain peptide hormone vasopressin.                                                                                                                    |
| N | P01182 | DE | Neurophysin 2;                                                                                                                                                                                |
| N | P01182 | DR | neurohypophyseal hormone activity                                                                                                                                                             |
| N | P01388 | CC | Produces peripheral paralysis by blocking neuromuscular transmission at the postsynaptic site                                                                                                 |
| N | P01388 | CC | Binds to muscular and neuronal (only alpha-7 alpha-8 alpha-9) nicotinic acetylcholine receptors (By similarity).                                                                              |
| N | P01388 | DE | Long neurotoxin 2;                                                                                                                                                                            |
| N | P01388 | DE | Neurotoxin B;                                                                                                                                                                                 |
| N | P01388 | DR | acetylcholine receptor inhibitor activity                                                                                                                                                     |
| N | P01388 | DR | synaptic transmission                                                                                                                                                                         |
| N | P01480 | CC | Alpha toxins bind voltage-independently at site-3 of sodium channels and inhibits the inactivation of the activated channels, thereby blocking neuronal transmission                          |
| N | P01480 | DE | Alpha-mammal toxin Aah3;                                                                                                                                                                      |
| N | P01480 | DE | Neurotoxin 3;                                                                                                                                                                                 |
| N | P01480 | DE | Neurotoxin III;                                                                                                                                                                               |
| N | P01480 | DR | defense response                                                                                                                                                                              |
| N | P01480 | DR | sodium channel inhibitor activity                                                                                                                                                             |
| N | P01757 | DE | Ig heavy chain V region J558;                                                                                                                                                                 |
| N | P01757 | DR | antigen binding                                                                                                                                                                               |
| N | P02431 | DE | 50S ribosomal protein L30;                                                                                                                                                                    |
| N | P02431 | DR | structural constituent of ribosome                                                                                                                                                            |
| N | P02440 | CC | The keratin products of mammalian epidermal derivatives such as wool and hair consist of microfibrils embedded in a rigid matrix of other proteins                                            |
| N | P02440 | CC | The matrix proteins include the high- sulfur and high-tyrosine keratins, having molecular weights of 6- 20 kDa, whereas the microfibrils contain the larger, low-sulfur keratins (40-56 kDa). |
| N | P02440 | DE | Keratin, high-sulfur matrix protein, B2C;                                                                                                                                                     |

|   |        |    |                                                                                                                                                                                                                            |
|---|--------|----|----------------------------------------------------------------------------------------------------------------------------------------------------------------------------------------------------------------------------|
| N | P02515 | DE | Heat shock protein 22;                                                                                                                                                                                                     |
| N | P02515 | DR | determination of adult lifespan                                                                                                                                                                                            |
| N | P02515 | DR | response to heat                                                                                                                                                                                                           |
| N | P02515 | DR | response to oxidative stress                                                                                                                                                                                               |
| N | P02774 | CC | Multifunctional protein found in plasma, ascitic fluid, cerebrospinal fluid, and urine and on the surface of many cell types                                                                                               |
| N | P02774 | CC | DBP associates with membrane-bound immunoglobulin on the surface of B-lymphocytes and with IgG Fc receptor on the membranes of T-lymphocytes.                                                                              |
| N | P02774 | CC | In plasma, it carries the vitamin D sterols and prevents polymerization of actin by binding its monomers                                                                                                                   |
| N | P02774 | DE | Gc-globulin;                                                                                                                                                                                                               |
| N | P02774 | DE | Group-specific component;                                                                                                                                                                                                  |
| N | P02774 | DE | Vitamin D-binding protein;                                                                                                                                                                                                 |
| N | P02774 | DR | actin binding                                                                                                                                                                                                              |
| N | P02774 | DR | hormone biosynthetic process                                                                                                                                                                                               |
| N | P02774 | DR | vitamin D binding                                                                                                                                                                                                          |
| N | P02774 | DR | vitamin D metabolic process                                                                                                                                                                                                |
| N | P02774 | DR | vitamin transporter activity                                                                                                                                                                                               |
| N | P02856 | CC | Seed storage protein.                                                                                                                                                                                                      |
| N | P02856 | DE | Vicilin, 14 kDa component;                                                                                                                                                                                                 |
| N | P02856 | DR | nutrient reservoir activity                                                                                                                                                                                                |
| N | P03167 | CC | Multifunctional protein that may modulate protein degradation pathways, apoptosis, transcription, signal transduction, cell cycle progress, and genetic stability by directly or indirectly interacting with hosts factors |
| N | P03167 | CC | Does not seem to be essential for HBV infection                                                                                                                                                                            |
| N | P03167 | CC | Effect on apoptosis is controversial depending on the cell types in which the studies have been conducted (By similarity).                                                                                                 |
| N | P03167 | CC | May be directly involved in development of cirrhosis and liver cancer (hepatocellular carcinoma)                                                                                                                           |
| N | P03167 | CC | Most of cytosolic activities involve modulation of cytosolic calcium                                                                                                                                                       |
| N | P03167 | DR | interspecies interaction between organisms                                                                                                                                                                                 |
| N | P03167 | DR | viral genome replication                                                                                                                                                                                                   |
| N | P03473 | CC | Catalyzes the removal of terminal sialic acid residues from viral and cellular glycoconjugates                                                                                                                             |
| N | P03473 | CC | Additionally helps virus spread through the circulation by further removing sialic acids from the cell surface                                                                                                             |
| N | P03473 | CC | Cleaves off the terminal sialic acids on the glycosylated HA during virus budding to facilitate virus release                                                                                                              |
| N | P03473 | CC | Described as a receptor-destroying enzyme because it cleaves a terminal sialic acid from the cellular receptors                                                                                                            |
| N | P03473 | CC | Likely to plays a role in the budding process through its association with lipid rafts during intracellular transport                                                                                                      |
| N | P03473 | CC | May additionally display a raft-association independent effect on budding                                                                                                                                                  |
| N | P03473 | CC | May facilitate viral invasion of the upper airways by cleaving the sialic acid moieties on the mucin of the airway epithelial cells                                                                                        |
| N | P03473 | CC | Otherwise, infection would be limited to one round of replication                                                                                                                                                          |
| N | P03473 | CC | Plays a role in the determination of host range restriction on replication and                                                                                                                                             |
| N | P03473 | CC | Sialidase activity in late endosome/lysosome traffic seems to enhance virus replication                                                                                                                                    |
| N | P03473 | CC | These cleavages prevent self-aggregation and ensure the efficient spread of the progeny virus from cell to cell                                                                                                            |
| N | P03473 | DE | Neuraminidase;                                                                                                                                                                                                             |
| N | P03473 | DR | carbohydrate metabolic process                                                                                                                                                                                             |
| N | P03473 | DR | exo-alpha-sialidase activity                                                                                                                                                                                               |
| N | P03473 | DR | metal ion binding                                                                                                                                                                                                          |
| N | P03517 | CC | Glycoprotein G1 and glycoprotein G2 interact with each other and are present at the surface of the virion                                                                                                                  |
| N | P03517 | CC | They are able to attach the virion to a cell receptor and to promote fusion of membranes after endocytosis of the virion (By similarity).                                                                                  |
| N | P03517 | DE | Envelope glycoprotein;                                                                                                                                                                                                     |
| N | P03517 | DE | Glycoprotein G1;                                                                                                                                                                                                           |
| N | P03517 | DE | Glycoprotein G2;                                                                                                                                                                                                           |
| N | P03517 | DE | M polyprotein;                                                                                                                                                                                                             |
| N | P03517 | DE | Non-structural protein NSm;                                                                                                                                                                                                |
| N | P03517 | DR | interspecies interaction between organisms                                                                                                                                                                                 |
| N | P03554 | CC | Encodes for at least two polypeptides: protease (PR) and reverse transcriptase (RT).                                                                                                                                       |

|   |        |    |                                                                                                                                                                                                                                                                                                     |
|---|--------|----|-----------------------------------------------------------------------------------------------------------------------------------------------------------------------------------------------------------------------------------------------------------------------------------------------------|
| N | P03554 | CC | After budding and infection, the RC-DNA migrates in the nucleus, and is converted into a plasmid-like covalently closed circular DNA (cccDNA) (By <del>similarly</del> )                                                                                                                            |
| N | P03554 | CC | Neo- synthesized pregenomic RNA (pgRNA) are encapsidated, and reverse-transcribed inside the nucleocapsid                                                                                                                                                                                           |
| N | P03554 | CC | Partial (+)DNA is synthesized from the (-)DNA template and generates the relaxed circular DNA (RC-DNA) genome                                                                                                                                                                                       |
| N | P03554 | CC | Reverse transcriptase is multifunctional enzyme that converts the viral RNA genome into dsDNA in viral cytoplasmic capsids                                                                                                                                                                          |
| N | P03554 | CC | The protease processes the polyprotein in cis<br>This enzyme displays a DNA polymerase activity that can copy either DNA or RNA templates, and a ribonuclease H (RNase H) activity that cleaves the RNA strand of RNA-DNA heteroduplexes in a partially processive 3'- to 5'-<br>endonucleasic mode |
| N | P03554 | DE | Aspartic protease;                                                                                                                                                                                                                                                                                  |
| N | P03554 | DE | Endonuclease;                                                                                                                                                                                                                                                                                       |
| N | P03554 | DE | Enzymatic polyprotein;                                                                                                                                                                                                                                                                              |
| N | P03554 | DE | Reverse transcriptase;                                                                                                                                                                                                                                                                              |
| N | P03554 | DR | RNA-dependent DNA replication                                                                                                                                                                                                                                                                       |
| N | P03554 | DR | RNA-directed DNA polymerase activity                                                                                                                                                                                                                                                                |
| N | P03554 | DR | aspartic-type endopeptidase activity                                                                                                                                                                                                                                                                |
| N | P03554 | DR | endonuclease activity                                                                                                                                                                                                                                                                               |
| N | P03657 | CC | Isoform G1P plays an essential role in phage assembly                                                                                                                                                                                                                                               |
| N | P03657 | CC | It is required to increase the number of adhesion zones between the inner and outer membranes of the host cell                                                                                                                                                                                      |
| N | P03657 | CC | May be involved with G4P in creating zone through which the phage assembles and buds.                                                                                                                                                                                                               |
| N | P03657 | CC | The budding of neo-synthesized phages occurs at these adhesion sites                                                                                                                                                                                                                                |
| N | P03657 | DE | Gene 1 protein;                                                                                                                                                                                                                                                                                     |
| N | P03657 | DR | viral assembly, maturation, egress, and release                                                                                                                                                                                                                                                     |
| N | P03712 | CC | Stabilizes the head shell following the rearrangement of the gpE subunits of the head shell lattice that accompanies expansion of the head                                                                                                                                                          |
| N | P03712 | CC | There are approximately 420 copies of protein D per mature phage.                                                                                                                                                                                                                                   |
| N | P03712 | DE | Head decoration protein;                                                                                                                                                                                                                                                                            |
| N | P03712 | DE | Major capsid protein D;                                                                                                                                                                                                                                                                             |
| N | P03738 | CC | Gene L protein is a minor tail protein, located at the distal end                                                                                                                                                                                                                                   |
| N | P03738 | CC | It is involved in the assembly of the initiator complex for tail polymerization.                                                                                                                                                                                                                    |
| N | P03738 | DE | Minor tail protein L;                                                                                                                                                                                                                                                                               |
| N | P03998 | CC | Coagulogen is a gel-forming protein of hemolymph; it hinders the spread of invaders by immobilizing them.                                                                                                                                                                                           |
| N | P03998 | DE | Coagulin chain A;                                                                                                                                                                                                                                                                                   |
| N | P03998 | DE | Coagulin chain B;                                                                                                                                                                                                                                                                                   |
| N | P03998 | DE | Peptide C;                                                                                                                                                                                                                                                                                          |
| N | P03998 | DR | hemolymph coagulation                                                                                                                                                                                                                                                                               |
| N | P04309 | DE | Uncharacterized 7.4 kDa protein;                                                                                                                                                                                                                                                                    |
| N | P04354 | CC | Buffers cytosolic calcium                                                                                                                                                                                                                                                                           |
| N | P04354 | CC | May stimulate a membrane Ca(2+)-ATPase and a 3',5'-cyclic nucleotide phosphodiesterase.                                                                                                                                                                                                             |
| N | P04354 | DE | Calbindin D28;                                                                                                                                                                                                                                                                                      |
| N | P04354 | DE | Vitamin D-dependent calcium-binding protein, avian-type;                                                                                                                                                                                                                                            |
| N | P04354 | DR | calcium ion binding                                                                                                                                                                                                                                                                                 |
| N | P04354 | DR | calcium ion transport                                                                                                                                                                                                                                                                               |
| N | P04354 | DR | cellular calcium ion homeostasis                                                                                                                                                                                                                                                                    |
| N | P04354 | DR | sensory perception of pain                                                                                                                                                                                                                                                                          |
| N | P04354 | DR | vitamin D binding                                                                                                                                                                                                                                                                                   |
| N | P04451 | DE | 60S ribosomal protein L23;                                                                                                                                                                                                                                                                          |
| N | P04451 | DR | structural constituent of ribosome                                                                                                                                                                                                                                                                  |
| N | P04586 | CC | Integrase performs the integration of the newly synthesized dsDNA copy of the viral genome into the host chromosome                                                                                                                                                                                 |
| N | P04586 | CC | The integrated DNA is called provirus.                                                                                                                                                                                                                                                              |
| N | P04586 | DE | Gag-Pol polyprotein;                                                                                                                                                                                                                                                                                |
| N | P04586 | DE | Integrase;                                                                                                                                                                                                                                                                                          |
| N | P04586 | DE | Pr160Gag-Pol;                                                                                                                                                                                                                                                                                       |
| N | P04586 | DR | RNA-dependent DNA replication                                                                                                                                                                                                                                                                       |
| N | P04586 | DR | endonuclease activity                                                                                                                                                                                                                                                                               |
| N | P04586 | DR | entry into host cell                                                                                                                                                                                                                                                                                |
| N | P04586 | DR | integrase activity                                                                                                                                                                                                                                                                                  |

|   |        |    |                                                                                                                                                                                                                                                                                    |
|---|--------|----|------------------------------------------------------------------------------------------------------------------------------------------------------------------------------------------------------------------------------------------------------------------------------------|
| N | P04586 | DR | provirus integration                                                                                                                                                                                                                                                               |
| N | P04586 | DR | uncoating of virus                                                                                                                                                                                                                                                                 |
| N | P04614 | CC | Nuclear transcriptional activator of viral gene expression, that is essential for viral transcription from the LTR promoter and replication                                                                                                                                        |
| N | P04614 | CC | Acts as a sequence-specific molecular adapter, directing components of the cellular transcription machinery to the viral RNA to promote processive transcription elongation by the RNA polymerase II (RNA pol II) complex, thereby increasing the level of full-length transcripts |
| N | P04614 | CC | Besides its effect on RNA Pol II processivity, Tat induces chromatin remodeling of proviral genes by recruiting the histone acetyltransferases (HATs) CREBBP, EP300 and PCAF to the chromatin                                                                                      |
| N | P04614 | CC | In the absence of Tat, the RNA Pol II generates short or non-processive transcripts that terminate at approximately 60 bp from the initiation site                                                                                                                                 |
| N | P04614 | CC | In the cytoplasm, Tat is thought to act as a translational activator of HIV-1 mRNAs (By similarity).                                                                                                                                                                               |
| N | P04614 | CC | In this purpose, it activates EIF2AK2/PKR which, in turns, may phosphorylate and target to degradation the inhibitor I kappa B- alpha which normally retains NF-kappa-B in the cytoplasm of unstimulated cells                                                                     |
| N | P04614 | CC | Interacts with the cellular capping enzyme RNGTT to mediate co-transcriptional capping of viral mRNAs                                                                                                                                                                              |
| N | P04614 | CC | Other factors such as HTATSF1/Tat-SF1, SUPT5H/SPT5, and HTATIP2 are also important for Tat's function                                                                                                                                                                              |
| N | P04614 | CC | Tat associates with the CCNT1/cyclin-T1 component of the P-TEFb complex (CDK9 and CCNT1), which promotes RNA chain elongation                                                                                                                                                      |
| N | P04614 | CC | Tat can reactivate a latently infected cell by penetrating in it and transactivating its LTR promoter                                                                                                                                                                              |
| N | P04614 | CC | Tat protein exerts as well a positive feedback on the translation of its cognate mRNA by interacting with the CDK9 component of P-TEFb and other Tat-activated kinases                                                                                                             |
| N | P04614 | CC | hyperphosphorylate the C-terminus of RNA Pol II that becomes stabilized and much more processive                                                                                                                                                                                   |
| N | P04614 | CC | This also contributes to the increase in proviral transcription rate, especially when the provirus integrates in transcriptionally silent region of the host genome                                                                                                                |
| N | P04614 | CC | This binding increases Tat's affinity for a hairpin structure at the 5'-end of all nascent viral mRNAs referred to as the transactivation responsive RNA element (TAR RNA) and allows Tat/P-TEFb complex to bind cooperatively to TAR RNA                                          |
| N | P04614 | CC | Through its interaction with TAR, Tat may be involved in transcription initiation as well                                                                                                                                                                                          |
| N | P04614 | CC | To ensure maximal activation of the LTR, Tat mediates nuclear translocation of NF-kappa-B                                                                                                                                                                                          |
| N | P04614 | DE | Protein Tat;                                                                                                                                                                                                                                                                       |
| N | P04614 | DE | Transactivating regulatory protein;                                                                                                                                                                                                                                                |
| N | P04614 | DR | evasion by virus of host immune response                                                                                                                                                                                                                                           |
| N | P04614 | DR | metal ion binding                                                                                                                                                                                                                                                                  |
| N | P04614 | DR | positive regulation of viral transcription                                                                                                                                                                                                                                         |
| N | P04614 | DR | regulation of transcription, DNA-dependent                                                                                                                                                                                                                                         |
| N | P04614 | DR | sequence-specific DNA binding transcription factor activity                                                                                                                                                                                                                        |
| N | P04668 | CC | Low-potential electron donor to a number of redox enzymes                                                                                                                                                                                                                          |
| N | P04668 | CC | NifF is the electron donor to nitrogenase.                                                                                                                                                                                                                                         |
| N | P04668 | DR | electron carrier activity                                                                                                                                                                                                                                                          |
| N | P04668 | DR | electron transport chain                                                                                                                                                                                                                                                           |
| N | P04668 | DR | iron ion binding                                                                                                                                                                                                                                                                   |
| N | P04668 | DR | nitrogen fixation                                                                                                                                                                                                                                                                  |
| N | P04668 | DR | oxidoreductase activity                                                                                                                                                                                                                                                            |
| N | P04801 | DE | Threonine--tRNA ligase;                                                                                                                                                                                                                                                            |
| N | P04801 | DE | Threonyl-tRNA synthetase, cytoplasmic;                                                                                                                                                                                                                                             |
| N | P04801 | DR | protein binding                                                                                                                                                                                                                                                                    |
| N | P04801 | DR | threonine-tRNA ligase activity                                                                                                                                                                                                                                                     |
| N | P04801 | DR | threonyl-tRNA aminoacylation                                                                                                                                                                                                                                                       |
| N | P05004 | CC | Produced by macrophages, IFN-alpha have antiviral activities.                                                                                                                                                                                                                      |
| N | P05004 | DE | Interferon alpha-2;                                                                                                                                                                                                                                                                |
| N | P05100 | CC | Hydrolysis of the deoxyribose N-glycosidic bond to excise 3-methyladenine from the damaged DNA polymer formed by alkylation lesions.                                                                                                                                               |
| N | P05100 | DE | 3-methyladenine-DNA glycosylase I, constitutive;                                                                                                                                                                                                                                   |
| N | P05100 | DE | DNA-3-methyladenine glycosidase I;                                                                                                                                                                                                                                                 |
| N | P05100 | DE | DNA-3-methyladenine glycosylase I;                                                                                                                                                                                                                                                 |
| N | P05100 | DE | DNA-3-methyladenine glycosylase I;                                                                                                                                                                                                                                                 |
| N | P05100 | DR | DNA-3-methyladenine glycosylase I activity                                                                                                                                                                                                                                         |

|   |        |    |                                                                                                                                                                                                                                                                          |
|---|--------|----|--------------------------------------------------------------------------------------------------------------------------------------------------------------------------------------------------------------------------------------------------------------------------|
| N | P05100 | DR | base-excision repair                                                                                                                                                                                                                                                     |
| N | P05100 | DR | metal ion binding                                                                                                                                                                                                                                                        |
| N | P05100 | DR | protein binding                                                                                                                                                                                                                                                          |
| N | P05123 | CC | Reversibly catalyzes the transfer of phosphate between ATP and various phosphogens (e.g. Creatine kinase isoenzymes play a central role in energy transduction in tissues with large, fluctuating energy demands, such as skeletal muscle, heart, brain and spermatozoa) |
| N | P05123 | CC | creatine phosphate)                                                                                                                                                                                                                                                      |
| N | P05123 | DE | Creatine kinase M chain;                                                                                                                                                                                                                                                 |
| N | P05123 | DE | Creatine kinase M-type;                                                                                                                                                                                                                                                  |
| N | P05123 | DR | creatine kinase activity                                                                                                                                                                                                                                                 |
| N | P05349 | CC | RuBisCO catalyzes two reactions: the carboxylation of D- ribulose 1,5-bisphosphate, the primary event in carbon dioxide fixation, as well as the oxidative fragmentation of the pentose substrate                                                                        |
| N | P05349 | CC | Both reactions occur simultaneously and in competition at the same active site (By similarity).                                                                                                                                                                          |
| N | P05349 | DE | Ribulose bisphosphate carboxylase small chain 3B, chloroplastic;                                                                                                                                                                                                         |
| N | P05349 | DE | RuBisCO small subunit 3B;                                                                                                                                                                                                                                                |
| N | P05349 | DR | monooxygenase activity                                                                                                                                                                                                                                                   |
| N | P05349 | DR | oxidation-reduction process                                                                                                                                                                                                                                              |
| N | P05349 | DR | photorespiration                                                                                                                                                                                                                                                         |
| N | P05349 | DR | reductive pentose-phosphate cycle                                                                                                                                                                                                                                        |
| N | P05349 | DR | ribulose-bisphosphate carboxylase activity                                                                                                                                                                                                                               |
| N | P05575 | DR | serine-type endopeptidase inhibitor activity                                                                                                                                                                                                                             |
| N | P05588 | DR | serine-type endopeptidase inhibitor activity                                                                                                                                                                                                                             |
| N | P05653 | CC | DNA gyrase negatively supercoils closed circular double- stranded DNA in an ATP-dependent manner and also catalyzes the interconversion of other topological isomers of double-stranded DNA rings, including catenanes and knotted rings                                 |
| N | P05653 | DE | DNA gyrase subunit A;                                                                                                                                                                                                                                                    |
| N | P05653 | DR | DNA topoisomerase (ATP-hydrolyzing) activity                                                                                                                                                                                                                             |
| N | P05653 | DR | DNA topological change                                                                                                                                                                                                                                                   |
| N | P05653 | DR | regulation of transcription, DNA-dependent                                                                                                                                                                                                                               |
| N | P05653 | DR | sequence-specific DNA binding transcription factor activity                                                                                                                                                                                                              |
| N | P05754 | DE | 40S ribosomal protein S8;                                                                                                                                                                                                                                                |
| N | P05754 | DR | maturation of SSU-rRNA from tricistronic rRNA transcript (SSU-rRNA, 5.8S rRNA, LSU-rRNA)                                                                                                                                                                                 |
| N | P05754 | DR | structural constituent of ribosome                                                                                                                                                                                                                                       |
| N | P05763 | DE | 30S ribosomal protein S9P;                                                                                                                                                                                                                                               |
| N | P05763 | DR | structural constituent of ribosome                                                                                                                                                                                                                                       |
| N | P06392 | DE | 50S ribosomal protein L33, chloroplastic;                                                                                                                                                                                                                                |
| N | P06392 | DR | structural constituent of ribosome                                                                                                                                                                                                                                       |
| N | P06410 | CC | NDH shuttles electrons from NAD(P)H:plastoquinone, via FMN and iron-sulfur (Fe-S) centers, to quinones in the photosynthetic chain and possibly in a chloroplast respiratory chain                                                                                       |
| N | P06410 | CC | Couples the redox reaction to proton translocation, and thus conserves the redox energy in a proton gradient (By similarity).                                                                                                                                            |
| N | P06410 | CC | The immediate electron acceptor for the enzyme in this species is believed to be plastoquinone                                                                                                                                                                           |
| N | P06410 | DE | NAD(P)H dehydrogenase subunit K;                                                                                                                                                                                                                                         |
| N | P06410 | DE | NAD(P)H-quinone oxidoreductase subunit K, chloroplastic;                                                                                                                                                                                                                 |
| N | P06410 | DE | NADH-plastoquinone oxidoreductase subunit K;                                                                                                                                                                                                                             |
| N | P06410 | DR | 4 iron, 4 sulfur cluster binding                                                                                                                                                                                                                                         |
| N | P06410 | DR | NADH dehydrogenase (ubiquinone) activity                                                                                                                                                                                                                                 |
| N | P06410 | DR | metal ion binding                                                                                                                                                                                                                                                        |
| N | P06410 | DR | oxidation-reduction process                                                                                                                                                                                                                                              |
| N | P06410 | DR | quinone binding                                                                                                                                                                                                                                                          |
| N | P06495 | DE | Calcium-binding protein;                                                                                                                                                                                                                                                 |
| N | P06495 | DE | Calerythrin;                                                                                                                                                                                                                                                             |
| N | P06495 | DR | calcium ion binding                                                                                                                                                                                                                                                      |
| N | P06511 | CC | PsaA and psaB bind P700, the primary electron donor of photosystem I (PSI), as well as the electron acceptors A0, A1 and FX                                                                                                                                              |
| N | P06511 | CC | Oxidized P700 is reduced on the luminal side of the thylakoid membrane by PstA                                                                                                                                                                                           |
| N | P06511 | CC | PstA is a plastocyanin-ferredoxin oxidoreductase, converting photonic excitation into a charge separation, which transfers an electron from the donor P700 chlorophyll pair to the spectroscopically characterized acceptors A0, A1, FX, FA and FB in turn               |

|   |        |    |                                                                                                                                                                                                    |
|---|--------|----|----------------------------------------------------------------------------------------------------------------------------------------------------------------------------------------------------|
| N | P06511 | DE | Photosystem I P700 chlorophyll a apoprotein A1;                                                                                                                                                    |
| N | P06511 | DR | 4 iron, 4 sulfur cluster binding                                                                                                                                                                   |
| N | P06511 | DR | chlorophyll binding                                                                                                                                                                                |
| N | P06511 | DR | electron transport chain                                                                                                                                                                           |
| N | P06511 | DR | metal ion binding                                                                                                                                                                                  |
| N | P06511 | DR | photosynthesis                                                                                                                                                                                     |
| N | P06511 | DR | protein-chromophore linkage                                                                                                                                                                        |
| N | P06650 | DE | Immunity protein;                                                                                                                                                                                  |
| N | P06738 | CC | Phosphorylase is an important allosteric enzyme in carbohydrate metabolism                                                                                                                         |
| N | P06738 | CC | Enzymes from different sources differ in their regulatory mechanisms and in their natural substrates                                                                                               |
| N | P06738 | CC | However, all known phosphorylases share catalytic and structural properties.                                                                                                                       |
| N | P06738 | DE | Glycogen phosphorylase;                                                                                                                                                                            |
| N | P06738 | DR | glycogen catabolic process                                                                                                                                                                         |
| N | P06738 | DR | glycogen phosphorylase activity                                                                                                                                                                    |
| N | P06738 | DR | protein binding                                                                                                                                                                                    |
| N | P06738 | DR | pyridoxal phosphate binding                                                                                                                                                                        |
| N | P06793 | CC | Minor protein of the capsid that localizes along the inner surface of the virion, within the central cavities beneath the L1 pentamers                                                             |
| N | P06793 | CC | During virion assembly, encapsidates the genome by direct interaction with the viral DNA (By similarity).                                                                                          |
| N | P06793 | CC | Later on, promotes late gene expression by interacting with the viral E2 protein and by inhibiting its transcriptional activation functions                                                        |
| N | P06793 | CC | mediates the viral genome import into the nucleus through binding to host importin                                                                                                                 |
| N | P06793 | CC | Once the virion enters the host cell, escorts the genomic DNA into the nucleus, in particular by promoting virion endosomal escape                                                                 |
| N | P06793 | CC | Once within the nucleus, L2 localizes viral genomes to PML bodies in order to activate early gene expression for establishment of infection                                                        |
| N | P06793 | CC | plays a role in capsid assembly through interaction with the major capsid protein L1                                                                                                               |
| N | P06793 | DE | Minor capsid protein L2;                                                                                                                                                                           |
| N | P06793 | DR | structural molecule activity                                                                                                                                                                       |
| N | P06935 | CC | Capsid protein C self-assembles to form an icosahedral capsid about 50 nm in diameter                                                                                                              |
| N | P06935 | CC | Envelope protein E binding to host cell surface receptor is followed by virus internalization through clathrin-mediated endocytosis                                                                |
| N | P06935 | CC | Non-structural protein 2A may be involved viral RNA replication and capsid assembly (Potential).                                                                                                   |
| N | P06935 | CC | Peptide 2k functions as a signal peptide for NS4B and is required for the interferon antagonism activity of the latter (By similarity).                                                            |
| N | P06935 | CC | RNA-directed RNA polymerase NS5 replicates the viral (+) and (-) genome, and performs the capping of genomes in the cytoplasm                                                                      |
| N | P06935 | CC | Serine protease NS3 displays three enzymatic activities: serine protease, NTPase and RNA helicase                                                                                                  |
| N | P06935 | CC | After cleavage of prM, envelope protein E dissociate from small envelope protein M and homodimerizes (By similarity).                                                                              |
| N | P06935 | CC | Besides its role in genome replication, also prevents the establishment of cellular antiviral state by blocking the interferon-alpha/beta (IFN-alpha/beta) signaling pathway                       |
| N | P06935 | CC | Envelope protein E is subsequently involved in membrane fusion between virion and host late endosomes                                                                                              |
| N | P06935 | CC | Inhibits host JAK1 and TYK2 phosphorylation, thereby preventing activation of JAK-STAT signaling pathway (By similarity).                                                                          |
| N | P06935 | CC | NS3 RNA helicase binds RNA and unwinds dsRNA in the 3' to 5' direction (By similarity).                                                                                                            |
| N | P06935 | CC | NS3 serine protease, in association with NS2B, performs its autocleavage and cleaves the polyprotein at dibasic sites in the cytoplasm: C-prM, NS2A-NS2B, NS2B-NS3, NS3-NS4A, NS4A-2K and NS4B-NS5 |
| N | P06935 | CC | NS5 methylates viral RNA cap at guanine N-7 and ribose 2'-O positions                                                                                                                              |
| N | P06935 | CC | Synthesized as an homodimer with prM which acts as a chaperone for envelope protein E                                                                                                              |
| N | P06935 | CC | The capsid encapsulates the genomic RNA (By similarity).                                                                                                                                           |
| N | P06935 | DE | Capsid protein C;                                                                                                                                                                                  |
| N | P06935 | DE | Core protein;                                                                                                                                                                                      |
| N | P06935 | DE | Envelope protein E;                                                                                                                                                                                |
| N | P06935 | DE | Flavivirin protease NS2B regulatory subunit;                                                                                                                                                       |
| N | P06935 | DE | Flavivirin protease NS3 catalytic subunit;                                                                                                                                                         |
| N | P06935 | DE | Genome polyprotein;                                                                                                                                                                                |



|   |        |    |                                                                                                                                                                                                   |
|---|--------|----|---------------------------------------------------------------------------------------------------------------------------------------------------------------------------------------------------|
| N | P06935 | DE | Matrix protein;                                                                                                                                                                                   |
| N | P06935 | DE | Non-structural protein 1;                                                                                                                                                                         |
| N | P06935 | DE | Non-structural protein 2A;                                                                                                                                                                        |
| N | P06935 | DE | Non-structural protein 2B;                                                                                                                                                                        |
| N | P06935 | DE | Non-structural protein 3;                                                                                                                                                                         |
| N | P06935 | DE | Non-structural protein 4A;                                                                                                                                                                        |
| N | P06935 | DE | Non-structural protein 4B;                                                                                                                                                                        |
| N | P06935 | DE | Peptide 2k;                                                                                                                                                                                       |
| N | P06935 | DE | Peptide pr;                                                                                                                                                                                       |
| N | P06935 | DE | RNA-directed RNA polymerase NS5;                                                                                                                                                                  |
| N | P06935 | DE | Serine protease NS3;                                                                                                                                                                              |
| N | P06935 | DE | Serine protease subunit NS2B;                                                                                                                                                                     |
| N | P06935 | DE | Small envelope protein M;                                                                                                                                                                         |
| N | P06935 | DR | ATP-dependent helicase activity                                                                                                                                                                   |
| N | P06935 | DR | RNA helicase activity                                                                                                                                                                             |
| N | P06935 | DR | RNA-directed RNA polymerase activity                                                                                                                                                              |
| N | P06935 | DR | double-stranded RNA binding                                                                                                                                                                       |
| N | P06935 | DR | evasion by virus of host immune response                                                                                                                                                          |
| N | P06935 | DR | mRNA (guanine-N7-)-methyltransferase activity                                                                                                                                                     |
| N | P06935 | DR | mRNA (nucleoside-2'-O-)-methyltransferase activity                                                                                                                                                |
| N | P06935 | DR | metal ion binding                                                                                                                                                                                 |
| N | P06935 | DR | protein binding                                                                                                                                                                                   |
| N | P06935 | DR | serine-type endopeptidase activity                                                                                                                                                                |
| N | P06935 | DR | serine-type exopeptidase activity                                                                                                                                                                 |
| N | P06935 | DR | structural molecule activity                                                                                                                                                                      |
| N | P06935 | DR | viral genome replication                                                                                                                                                                          |
| N | P07167 | DE | Limited host range virA protein;                                                                                                                                                                  |
| N | P07167 | DR | peptidyl-histidine phosphorylation                                                                                                                                                                |
| N | P07167 | DR | regulation of transcription, DNA-dependent                                                                                                                                                        |
| N | P07167 | DR | two-component response regulator activity                                                                                                                                                         |
| N | P07167 | DR | two-component sensor activity                                                                                                                                                                     |
| N | P07180 | CC | RuBisCO catalyzes two reactions: the carboxylation of D- ribulose 1,5-bisphosphate, the primary event in carbon dioxide fixation, as well as the oxidative fragmentation of the pentose substrate |
| N | P07180 | CC | Both reactions occur simultaneously and in competition at the same active site (By similarity).                                                                                                   |
| N | P07180 | DE | Ribulose bisphosphate carboxylase small chain 3A/3C, chloroplastic;                                                                                                                               |
| N | P07180 | DE | RuBisCO small subunit 3A/3C;                                                                                                                                                                      |
| N | P07180 | DR | monooxygenase activity                                                                                                                                                                            |
| N | P07180 | DR | oxidation-reduction process                                                                                                                                                                       |
| N | P07180 | DR | photorespiration                                                                                                                                                                                  |
| N | P07180 | DR | reductive pentose-phosphate cycle                                                                                                                                                                 |
| N | P07180 | DR | ribulose-bisphosphate carboxylase activity                                                                                                                                                        |
| N | P07489 | CC | Thyroid hormone-binding protein                                                                                                                                                                   |
| N | P07489 | CC | Probably transports thyroxine from the bloodstream to the brain (By similarity).                                                                                                                  |
| N | P07489 | DE | Transthyretin;                                                                                                                                                                                    |
| N | P07489 | DR | hormone activity                                                                                                                                                                                  |
| N | P07635 | DE | Beta-fructofuranosidase 7;                                                                                                                                                                        |
| N | P07635 | DE | DE Flags: Precursor; Fragments;                                                                                                                                                                   |
| N | P07635 | DE | Invertase 7;                                                                                                                                                                                      |
| N | P07635 | DR | carbohydrate metabolic process                                                                                                                                                                    |
| N | P07635 | DR | sucrose alpha-glucosidase activity                                                                                                                                                                |
| N | P07795 | CC | Core component of nucleosome                                                                                                                                                                      |
| N | P07795 | CC | DNA accessibility is regulated via a complex set of post-translational modifications of histones, also called histone code, and nucleosome remodeling.                                            |
| N | P07795 | CC | Histones thereby play a central role in transcription regulation, DNA repair, DNA replication and chromosomal stability                                                                           |
| N | P07795 | CC | Nucleosomes wrap and compact DNA into chromatin, limiting DNA accessibility to the cellular machineries which require DNA as a template                                                           |
| N | P07795 | DE | Late histone H2B.2.2;                                                                                                                                                                             |
| N | P07795 | DR | nucleosome assembly                                                                                                                                                                               |
| N | P07855 | CC | Fatty acid synthetase catalyzes the formation of long- chain fatty acids from acetyl-CoA, malonyl-CoA and NADPH                                                                                   |
| N | P07855 | CC | This multifunctional protein has 7 catalytic activities and an acyl carrier protein.                                                                                                              |
| N | P07855 | DE | Fatty acid synthase;                                                                                                                                                                              |

|   |        |    |                                                                                                                                                                                                                        |
|---|--------|----|------------------------------------------------------------------------------------------------------------------------------------------------------------------------------------------------------------------------|
| N | P07855 | DR | acyl carrier activity                                                                                                                                                                                                  |
| N | P07855 | DR | cofactor binding                                                                                                                                                                                                       |
| N | P07855 | DR | fatty acid biosynthetic process                                                                                                                                                                                        |
| N | P07855 | DR | fatty acid synthase activity                                                                                                                                                                                           |
| N | P07855 | DR | phosphopantetheine binding                                                                                                                                                                                             |
| N | P07859 | CC | Regulatory protein of the TOL plasmid xyl operons                                                                                                                                                                      |
| N | P07859 | CC | XylS activates the xylXYZLTEGFJQKIH operon required for the degradation of toluene, m-xylene and p-xylene.                                                                                                             |
| N | P07859 | DE | XylDLEGF operon transcriptional activator;                                                                                                                                                                             |
| N | P07859 | DR | aromatic compound catabolic process                                                                                                                                                                                    |
| N | P07859 | DR | regulation of transcription, DNA-dependent                                                                                                                                                                             |
| N | P07859 | DR | sequence-specific DNA binding                                                                                                                                                                                          |
| N | P07859 | DR | sequence-specific DNA binding transcription factor activity                                                                                                                                                            |
| N | P07920 | DE | 1-aminocyclopropane-1-carboxylate oxidase 2;                                                                                                                                                                           |
| N | P07920 | DE | ACC oxidase 2;                                                                                                                                                                                                         |
| N | P07920 | DE | Ethylene-forming enzyme;                                                                                                                                                                                               |
| N | P07920 | DE | Protein GTOMA;                                                                                                                                                                                                         |
| N | P07920 | DR | 1-aminocyclopropane-1-carboxylate oxidase activity                                                                                                                                                                     |
| N | P07920 | DR | L-ascorbic acid binding                                                                                                                                                                                                |
| N | P07920 | DR | ethylene biosynthetic process                                                                                                                                                                                          |
| N | P07920 | DR | metal ion binding                                                                                                                                                                                                      |
| N | P07920 | DR | oxidation-reduction process                                                                                                                                                                                            |
| N | P08045 | CC | Binds to poly-G sequences in RNA                                                                                                                                                                                       |
| N | P08045 | CC | May function in post- translational regulation processes.                                                                                                                                                              |
| N | P08045 | DE | Xenopus fingers protein;                                                                                                                                                                                               |
| N | P08045 | DE | Zinc finger protein Xfin;                                                                                                                                                                                              |
| N | P08045 | DR | regulation of transcription, DNA-dependent                                                                                                                                                                             |
| N | P08045 | DR | zinc ion binding                                                                                                                                                                                                       |
| N | P08202 | CC | Catalyzes the conversion of L-arabinose to L-ribulose.                                                                                                                                                                 |
| N | P08202 | DE | L-arabinose isomerase;                                                                                                                                                                                                 |
| N | P08202 | DR | L-arabinose catabolic process to xylulose 5-phosphate                                                                                                                                                                  |
| N | P08202 | DR | L-arabinose isomerase activity                                                                                                                                                                                         |
| N | P08202 | DR | L-fucose isomerase activity                                                                                                                                                                                            |
| N | P08202 | DR | fucose metabolic process                                                                                                                                                                                               |
| N | P08202 | DR | metal ion binding                                                                                                                                                                                                      |
| N | P08372 | CC | Not yet known.                                                                                                                                                                                                         |
| N | P08372 | DE | Prepilin peptidase-dependent protein C;                                                                                                                                                                                |
| N | P08502 | CC | Component of the ubiquinol-cytochrome c reductase complex (complex III or cytochrome b-c1 complex), which is a respiratory chain that generates an electrochemical potential coupled to ATP synthesis (By similarity). |
| N | P08502 | DE | Cytochrome b;                                                                                                                                                                                                          |
| N | P08502 | DR | electron carrier activity                                                                                                                                                                                              |
| N | P08502 | DR | metal ion binding                                                                                                                                                                                                      |
| N | P08502 | DR | oxidoreductase activity                                                                                                                                                                                                |
| N | P08502 | DR | respiratory electron transport chain                                                                                                                                                                                   |
| N | P08535 | CC | Involved in oxygen transport from the lung to the various peripheral tissues.                                                                                                                                          |
| N | P08535 | DE | Beta-globin;                                                                                                                                                                                                           |
| N | P08535 | DE | Hemoglobin beta chain;                                                                                                                                                                                                 |
| N | P08535 | DE | Hemoglobin subunit beta;                                                                                                                                                                                               |
| N | P08535 | DR | oxygen binding                                                                                                                                                                                                         |
| N | P08535 | DR | oxygen transporter activity                                                                                                                                                                                            |
| N | P08691 | CC | Involved in arsenical resistance                                                                                                                                                                                       |
| N | P08691 | CC | Thought to form the channel of an arsenite pump.                                                                                                                                                                       |
| N | P08691 | DE | Arsenical pump membrane protein;                                                                                                                                                                                       |
| N | P08691 | DR | arsenite transmembrane transporter activity                                                                                                                                                                            |
| N | P08691 | DR | response to arsenic-containing substance                                                                                                                                                                               |
| N | P08861 | CC | Efficient protease with alanine specificity but only little elastolytic activity.                                                                                                                                      |
| N | P08861 | DE | Chymotrypsin-like elastase family member 3B;                                                                                                                                                                           |
| N | P08861 | DE | Elastase IIIB;                                                                                                                                                                                                         |
| N | P08861 | DE | Elastase-3B;                                                                                                                                                                                                           |
| N | P08861 | DR | cholesterol metabolic process                                                                                                                                                                                          |
| N | P08861 | DR | serine-type endopeptidase activity                                                                                                                                                                                     |
| N | P08988 | CC | Resistance to antibiotics containing the 2-deoxy- streptamine ring including gentamicin, kanamycin, tobramycin, neomycin and apramycin.                                                                                |
| N | P08988 | DE | Aminocyclitol 3-N-acetyltransferase type IV;                                                                                                                                                                           |

|   |        |    |                                                                                                                                                                                                                           |
|---|--------|----|---------------------------------------------------------------------------------------------------------------------------------------------------------------------------------------------------------------------------|
| N | P08988 | DE | Aminoglycoside N(3')-acetyltransferase IV;                                                                                                                                                                                |
| N | P08988 | DR | aminoglycoside 3-N-acetyltransferase activity                                                                                                                                                                             |
| N | P08988 | DR | response to antibiotic                                                                                                                                                                                                    |
| N | P09015 | DE | Homeobox protein en-2a;                                                                                                                                                                                                   |
| N | P09015 | DE | Homeobox protein engrailed-2a;                                                                                                                                                                                            |
| N | P09015 | DR | anterior/posterior pattern formation                                                                                                                                                                                      |
| N | P09015 | DR | cell fate specification                                                                                                                                                                                                   |
| N | P09015 | DR | midbrain development                                                                                                                                                                                                      |
| N | P09015 | DR | regulation of transcription, DNA-dependent                                                                                                                                                                                |
| N | P09015 | DR | sequence-specific DNA binding                                                                                                                                                                                             |
| N | P09015 | DR | sequence-specific DNA binding transcription factor activity                                                                                                                                                               |
| N | P09015 | DR | transcription regulator activity                                                                                                                                                                                          |
| N | P09301 | DE | Gene 53 protein;                                                                                                                                                                                                          |
| N | P09384 | CC | Involved in the transmission of sensory signals from the chemoreceptors to the flagellar motors                                                                                                                           |
| N | P09384 | CC | CheA is autophosphorylated, it can transfer its phosphate group to either CheB or CheY                                                                                                                                    |
| N | P09384 | DE | Chemotaxis protein CheA;                                                                                                                                                                                                  |
| N | P09384 | DR | peptidyl-histidine phosphorylation                                                                                                                                                                                        |
| N | P09384 | DR | two-component sensor activity                                                                                                                                                                                             |
| N | P09738 | CC | Destroys radicals which are normally produced within the cells and which are toxic to biological systems.                                                                                                                 |
| N | P09738 | DE | Superoxide dismutase [Mn/Fe];                                                                                                                                                                                             |
| N | P09738 | DR | metal ion binding                                                                                                                                                                                                         |
| N | P09738 | DR | oxidation-reduction process                                                                                                                                                                                               |
| N | P09738 | DR | superoxide dismutase activity                                                                                                                                                                                             |
| N | P09738 | DR | superoxide metabolic process                                                                                                                                                                                              |
| N | P09779 | DE | Protein virB6;                                                                                                                                                                                                            |
| N | P09779 | DR | protein secretion by the type IV secretion system                                                                                                                                                                         |
| N | P09854 | CC | Replicates viral genomic DNA                                                                                                                                                                                              |
| N | P09854 | CC | Additionally, the polymerase contains an intrinsic ribonuclease H (RNase H) activity that specifically degrades RNA/DNA heteroduplexes or duplex DNA substrates in the 5' to 3' direction                                 |
| N | P09854 | CC | The replication complex is composed of six viral proteins: the DNA polymerase, processivity factor, primase, primase-associated factor, helicase, and ssDNA-binding protein                                               |
| N | P09854 | CC | Therefore, it can catalyze the excision of the RNA primers that initiate the synthesis of Okazaki fragments at a replication fork during viral DNA replication (By similarity)                                            |
| N | P09854 | DE | DNA polymerase catalytic subunit;                                                                                                                                                                                         |
| N | P09854 | DR | DNA replication                                                                                                                                                                                                           |
| N | P09854 | DR | DNA-directed DNA polymerase activity                                                                                                                                                                                      |
| N | P09854 | DR | nucleotide binding                                                                                                                                                                                                        |
| N | P09854 | DR | ribonuclease H activity                                                                                                                                                                                                   |
| N | P0A016 | CC | Key enzyme in folate metabolism                                                                                                                                                                                           |
| N | P0A016 | CC | Catalyzes an essential reaction for de novo glycine and purine synthesis, and for DNA precursor synthesis (By similarity).                                                                                                |
| N | P0A016 | DE | Dihydrofolate reductase;                                                                                                                                                                                                  |
| N | P0A016 | DR | dihydrofolate reductase activity                                                                                                                                                                                          |
| N | P0A016 | DR | glycine biosynthetic process                                                                                                                                                                                              |
| N | P0A016 | DR | nucleotide biosynthetic process                                                                                                                                                                                           |
| N | P0A016 | DR | one-carbon metabolic process                                                                                                                                                                                              |
| N | P0A016 | DR | oxidation-reduction process                                                                                                                                                                                               |
| N | P0A0B9 | DE | Phosphotagatokinase;                                                                                                                                                                                                      |
| N | P0A0B9 | DE | Tagatose-6-phosphate kinase;                                                                                                                                                                                              |
| N | P0A0B9 | DR | lactose catabolic process via tagatose-6-phosphate                                                                                                                                                                        |
| N | P0A0B9 | DR | tagatose-6-phosphate kinase activity                                                                                                                                                                                      |
| N | P0A0C0 | CC | Resistance to gentamicin, tobramycin, and kanamycin                                                                                                                                                                       |
| N | P0A0C0 | CC | Tobramycin and kanamycin resistance is due to the ACC activity, specified by N-terminal region, and the gentamicin resistance is due to the APH activity encoded by the C-terminal region of the protein (By similarity). |
| N | P0A0C0 | DE | 2"-aminoglycoside phosphotransferase;                                                                                                                                                                                     |
| N | P0A0C0 | DE | 6'-aminoglycoside N-acetyltransferase;                                                                                                                                                                                    |
| N | P0A0C0 | DE | Bifunctional AAC/APH;                                                                                                                                                                                                     |
| N | P0A0C0 | DR | N-acetyltransferase activity                                                                                                                                                                                              |
| N | P0A0C0 | DR | kinase activity                                                                                                                                                                                                           |
| N | P0A0C0 | DR | response to antibiotic                                                                                                                                                                                                    |

|   |        |    |                                                                                                                                                                                                                                                                                                                 |
|---|--------|----|-----------------------------------------------------------------------------------------------------------------------------------------------------------------------------------------------------------------------------------------------------------------------------------------------------------------|
| N | P0A0T5 | CC | Important in the cellular metabolism or defense processes particular to this pathogen (By similarity).                                                                                                                                                                                                          |
| N | P0A0T5 | DE | Glutathione peroxidase homolog;                                                                                                                                                                                                                                                                                 |
| N | P0A0T5 | DR | glutathione peroxidase activity                                                                                                                                                                                                                                                                                 |
| N | P0A0T5 | DR | oxidation-reduction process                                                                                                                                                                                                                                                                                     |
| N | P0A0T5 | DR | response to oxidative stress                                                                                                                                                                                                                                                                                    |
| N | P0A1V2 | DE | Insertion element IS629 uncharacterized 12 kDa protein S4062;                                                                                                                                                                                                                                                   |
| N | P0A1V2 | DR | transposase activity                                                                                                                                                                                                                                                                                            |
| N | P0A1V2 | DR | transposition, DNA-mediated                                                                                                                                                                                                                                                                                     |
| N | P0A2B7 | CC | Involved in DNA recombination (By similarity).                                                                                                                                                                                                                                                                  |
| N | P0A2B7 | DE | DNA recombination protein rmuC;                                                                                                                                                                                                                                                                                 |
| N | P0A2B7 | DR | DNA recombination<br>DNA gyrase negatively supercoils closed circular double-stranded DNA in an                                                                                                                                                                                                                 |
| N | P0A2I3 | CC | ATP-dependent manner and also catalyzes the interconversion of other topological isomers of double-stranded DNA rings, including catenanes and knotted rings                                                                                                                                                    |
| N | P0A2I3 | DE | DNA gyrase subunit B;                                                                                                                                                                                                                                                                                           |
| N | P0A2I3 | DR | DNA topoisomerase (ATP-hydrolyzing) activity                                                                                                                                                                                                                                                                    |
| N | P0A2I3 | DR | DNA topological change                                                                                                                                                                                                                                                                                          |
| N | P0A2I3 | DR | response to antibiotic                                                                                                                                                                                                                                                                                          |
| N | P0A3B3 | CC | Not known; probably interacts with the ribosomes in a GTP dependent manner (By similarity).                                                                                                                                                                                                                     |
| N | P0A3B3 | DE | GTP-binding protein TypA/BipA;                                                                                                                                                                                                                                                                                  |
| N | P0A3B3 | DE | Tyrosine phosphorylated protein A;                                                                                                                                                                                                                                                                              |
| N | P0A3B3 | DR | GTPase activity                                                                                                                                                                                                                                                                                                 |
| N | P0A3K0 | DE | Uncharacterized low temperature-induced protein all0457;<br>IF-3 binds to the 30S ribosomal subunit and shifts the equilibrium between 70S ribosomes and their 50S and 30S subunits in favor of the free subunits, thus enhancing the availability of 30S subunits on which protein synthesis initiation begins |
| N | P0A3K8 | CC | Translation initiation factor IF-3;                                                                                                                                                                                                                                                                             |
| N | P0A3K8 | DE | translation initiation factor activity                                                                                                                                                                                                                                                                          |
| N | P0A3K8 | DR | translation initiation factor activity                                                                                                                                                                                                                                                                          |
| N | P0A3U0 | CC | Multifunctional protein that promotes group II intron splicing and mobility by acting both on RNA and DNA                                                                                                                                                                                                       |
| N | P0A3U0 | CC | After DNA cleavage, retronoming occurs by a target DNA-primed reverse transcription of the intron RNA that had reverse spliced into the sense strand of the recipient DNA                                                                                                                                       |
| N | P0A3U0 | CC | After splicing, the protein remains bound to the excised intron lariat RNA, forming ribonucleoprotein particles, and cleaving the antisense strand of the recipient DNA in the 3' exon                                                                                                                          |
| N | P0A3U0 | CC | It also contributes to the recognition of the DNA target site and acts as a repressor of its own translation.                                                                                                                                                                                                   |
| N | P0A3U0 | CC | it has three activities: reverse transcriptase (RT) for intron duplication, maturase to promote splicing, and DNA endonuclease for site-specific cleavage of recipient alleles                                                                                                                                  |
| N | P0A3U0 | CC | The intron-encoded protein promotes splicing by facilitating the formation of the catalytically active structure of the intron RNA                                                                                                                                                                              |
| N | P0A3U0 | DE | DNA endonuclease;                                                                                                                                                                                                                                                                                               |
| N | P0A3U0 | DE | Group II intron-encoded protein ItrA;                                                                                                                                                                                                                                                                           |
| N | P0A3U0 | DE | RNA maturase;                                                                                                                                                                                                                                                                                                   |
| N | P0A3U0 | DE | Reverse-transcriptase;                                                                                                                                                                                                                                                                                          |
| N | P0A3U0 | DR | RNA-dependent DNA replication                                                                                                                                                                                                                                                                                   |
| N | P0A3U0 | DR | RNA-directed DNA polymerase activity                                                                                                                                                                                                                                                                            |
| N | P0A3U0 | DR | endonuclease activity                                                                                                                                                                                                                                                                                           |
| N | P0A3U0 | DR | intron homing                                                                                                                                                                                                                                                                                                   |
| N | P0A3U0 | DR | mRNA processing                                                                                                                                                                                                                                                                                                 |
| N | P0A3V7 | CC | VirB proteins are suggested to act at the bacterial surface and there play an important role in directing T-DNA transfer to plant cells.                                                                                                                                                                        |
| N | P0A3V7 | DE | Protein virB1;                                                                                                                                                                                                                                                                                                  |
| N | P0A3W8 | CC | Involved in DNA transformation; mediates the nuclear uptake of single-stranded DNA copies of the transferred DNA (T-DNA) element                                                                                                                                                                                |
| N | P0A3W8 | CC | Binds single-stranded but not double-stranded DNA regardless of nucleotide sequence composition.                                                                                                                                                                                                                |
| N | P0A3W8 | DE | Single-strand DNA-binding protein;                                                                                                                                                                                                                                                                              |
| N | P0A3W8 | DR | DNA mediated transformation                                                                                                                                                                                                                                                                                     |
| N | P0A3W8 | DR | protein binding                                                                                                                                                                                                                                                                                                 |
| N | P0A3X6 | CC | Through the carboxylation of phosphoenolpyruvate (PEP) it forms oxaloacetate, a four-carbon dicarboxylic acid source for the tricarboxylic acid cycle.                                                                                                                                                          |
| N | P0A3X6 | DE | Phosphoenolpyruvate carboxylase;                                                                                                                                                                                                                                                                                |

|   |        |    |                                                                                                                                                                                                                                          |
|---|--------|----|------------------------------------------------------------------------------------------------------------------------------------------------------------------------------------------------------------------------------------------|
| N | P0A3X6 | DR | carbon fixation                                                                                                                                                                                                                          |
| N | P0A3X6 | DR | phosphoenolpyruvate carboxylase activity                                                                                                                                                                                                 |
| N | P0A3X6 | DR | tricarboxylic acid cycle                                                                                                                                                                                                                 |
| N | P0A4A6 | CC | With S4 and S5 plays an important role in translational accuracy (By similarity).                                                                                                                                                        |
| N | P0A4A6 | DE | 30S ribosomal protein S12;                                                                                                                                                                                                               |
| N | P0A4A6 | DR | response to antibiotic                                                                                                                                                                                                                   |
| N | P0A4A6 | DR | structural constituent of ribosome                                                                                                                                                                                                       |
| N | P0A4L9 | CC | DNA gyrase negatively supercoils closed circular double- stranded DNA in an ATP-dependent manner and also catalyzes the interconversion of other topological isomers of double-stranded DNA rings, including catenanes and knotted rings |
| N | P0A4L9 | DE | DNA gyrase subunit B;                                                                                                                                                                                                                    |
| N | P0A4L9 | DR | DNA topoisomerase (ATP-hydrolyzing) activity                                                                                                                                                                                             |
| N | P0A4L9 | DR | DNA topological change                                                                                                                                                                                                                   |
| N | P0A4L9 | DR | response to antibiotic                                                                                                                                                                                                                   |
| N | P0A4V5 | CC | Proteins of the antigen 85 complex are responsible for the high affinity of mycobacteria to fibronectin                                                                                                                                  |
| N | P0A4V5 | CC | Possesses a mycolyltransferase activity required for the biogenesis of trehalose dimycolate (cord factor), a dominant structure necessary for maintaining cell wall integrity (By similarity).                                           |
| N | P0A4V5 | DE | Antigen 85 complex C;                                                                                                                                                                                                                    |
| N | P0A4V5 | DE | Antigen 85-C;                                                                                                                                                                                                                            |
| N | P0A4V5 | DE | Fibronectin-binding protein C;                                                                                                                                                                                                           |
| N | P0A4V5 | DE | Mycolyl transferase 85C;                                                                                                                                                                                                                 |
| N | P0A4V5 | DR | acyltransferase activity                                                                                                                                                                                                                 |
| N | P0A5E5 | DE | Uncharacterized protein Rv1291c/MT1330;                                                                                                                                                                                                  |
| N | P0A5V5 | DE | 50S ribosomal protein L17;                                                                                                                                                                                                               |
| N | P0A5V5 | DR | structural constituent of ribosome                                                                                                                                                                                                       |
| N | P0A5W0 | DE | 50S ribosomal protein L33 1;                                                                                                                                                                                                             |
| N | P0A5W0 | DR | structural constituent of ribosome                                                                                                                                                                                                       |
| N | P0A5Z4 | CC | Member of the two-component regulatory system mtrA/mtrB.                                                                                                                                                                                 |
| N | P0A5Z4 | DE | DNA-binding response regulator mtrA;                                                                                                                                                                                                     |
| N | P0A5Z4 | DR | growth of symbiont in host                                                                                                                                                                                                               |
| N | P0A5Z4 | DR | protein phosphorylation                                                                                                                                                                                                                  |
| N | P0A5Z4 | DR | regulation of transcription, DNA-dependent                                                                                                                                                                                               |
| N | P0A5Z4 | DR | two-component response regulator activity                                                                                                                                                                                                |
| N | P0A6N8 | DE | Elongation factor P-like protein;                                                                                                                                                                                                        |
| N | P0A6N8 | DR | peptide biosynthetic process                                                                                                                                                                                                             |
| N | P0A6N8 | DR | translation elongation factor activity                                                                                                                                                                                                   |
| N | P0A6P3 | CC | Associates with the EF-Tu.GDP complex and induces the exchange of GDP to GTP                                                                                                                                                             |
| N | P0A6P3 | CC | It remains bound to the aminoacyl-tRNA.EF- Tu.GTP complex up to the GTP hydrolysis stage on the ribosome.                                                                                                                                |
| N | P0A6P3 | DE | Elongation factor Ts;                                                                                                                                                                                                                    |
| N | P0A6P3 | DR | translation elongation factor activity                                                                                                                                                                                                   |
| N | P0A7D2 | CC | The natural substrate for this enzyme may be peptidyl- tRNAs which drop off the ribosome during protein synthesis (By similarity).                                                                                                       |
| N | P0A7D2 | DE | Peptidyl-tRNA hydrolase;                                                                                                                                                                                                                 |
| N | P0A7D2 | DR | aminoacyl-tRNA hydrolase activity                                                                                                                                                                                                        |
| N | P0A7J1 | CC | Catalyzes the conversion of D-ribulose 5-phosphate to formate and 3,4-dihydroxy-2-butanone 4-phosphate (By similarity).                                                                                                                  |
| N | P0A7J1 | DE | 3,4-dihydroxy-2-butanone 4-phosphate synthase;                                                                                                                                                                                           |
| N | P0A7J1 | DE | DHBP synthase;                                                                                                                                                                                                                           |
| N | P0A7J1 | DR | 3,4-dihydroxy-2-butanone-4-phosphate synthase activity                                                                                                                                                                                   |
| N | P0A7J1 | DR | metal ion binding                                                                                                                                                                                                                        |
| N | P0A7J1 | DR | riboflavin biosynthetic process                                                                                                                                                                                                          |
| N | P0A837 | DE | Succinyl-CoA ligase [ADP-forming] subunit beta;                                                                                                                                                                                          |
| N | P0A837 | DE | Succinyl-CoA synthetase subunit beta;                                                                                                                                                                                                    |
| N | P0A837 | DR | metal ion binding                                                                                                                                                                                                                        |
| N | P0A837 | DR | succinate-CoA ligase (ADP-forming) activity                                                                                                                                                                                              |
| N | P0A837 | DR | tricarboxylic acid cycle                                                                                                                                                                                                                 |
| N | P0A8B1 | CC | Required for maturation of 30S ribosomal subunits (By similarity).                                                                                                                                                                       |
| N | P0A8B1 | DE | Ribosome maturation factor rimP;                                                                                                                                                                                                         |
| N | P0A8B1 | DR | ribosome biogenesis                                                                                                                                                                                                                      |
| N | P0A8C4 | DE | UPF0149 protein ygfB;                                                                                                                                                                                                                    |
| N | P0A8C6 | DE | UPF0149 protein ygfB;                                                                                                                                                                                                                    |

|   |        |    |                                                                                                                                                                                                       |
|---|--------|----|-------------------------------------------------------------------------------------------------------------------------------------------------------------------------------------------------------|
| N | P0A8I9 | CC | Specifically methylates the pseudouridine at position 1915 (m3Psi1915) in 23S rRNA (By similarity).                                                                                                   |
| N | P0A8I9 | DE | 23S rRNA m3Psi1915 methyltransferase;                                                                                                                                                                 |
| N | P0A8I9 | DE | Ribosomal RNA large subunit methyltransferase H;                                                                                                                                                      |
| N | P0A8I9 | DE | rRNA (pseudouridine-N3-)-methyltransferase rlmH;                                                                                                                                                      |
| N | P0A8I9 | DR | methyltransferase activity                                                                                                                                                                            |
| N | P0A8I9 | DR | rRNA methylation                                                                                                                                                                                      |
| N | P0A8Y9 | CC | Displays esterase activity toward pantoic-CoA and pntF-butyrate (By similarity)                                                                                                                       |
| N | P0A8Y9 | DE | Esterase YbdB;                                                                                                                                                                                        |
| N | P0A8Y9 | DR | hydrolase activity                                                                                                                                                                                    |
| N | P0A9I4 | CC | Thought to play a role in bacterial envelope integrity                                                                                                                                                |
| N | P0A9I4 | CC | Very strongly associated with the peptidoglycan (By similarity).                                                                                                                                      |
| N | P0A9I4 | DE | Peptidoglycan-associated lipoprotein;                                                                                                                                                                 |
| N | P0A9H1 | CC | Excises 6-methylcytosine and uracil, which can arise by alkylation or deamination of cytosine, respectively, from the corresponding mispairs with guanine in ds-RNA                                   |
| N | P0A9H1 | CC | It is capable of hydrolyzing the carbon-nitrogen bond between the sugar-phosphate backbone of the DNA and the mispaired base                                                                          |
| N | P0A9H1 | CC | Required for DNA damage lesion repair in stationary-phase cells.                                                                                                                                      |
| N | P0A9H1 | CC | The complementary strand guanine functions in substrate recognition                                                                                                                                   |
| N | P0A9H1 | DE | Double-strand-specific uracil glycosylase;                                                                                                                                                            |
| N | P0A9H1 | DE | G/U mismatch-specific DNA glycosylase;                                                                                                                                                                |
| N | P0A9H1 | DE | Mismatch-specific uracil DNA-glycosylase;                                                                                                                                                             |
| N | P0A9H1 | DR | base-excision repair, AP site formation                                                                                                                                                               |
| N | P0A9H1 | DR | pyrimidine-specific mismatch base pair DNA N-glycosylase activity                                                                                                                                     |
| N | P0A9Y2 | CC | Binds to and stimulates the transcription of the CCAAT- containing, cold-shock-inducible promoters of the H-NS and GyrA proteins                                                                      |
| N | P0A9Y2 | CC | Binds also to the inverted repeat 5'-ATTGG-3' (By similarity).                                                                                                                                        |
| N | P0A9Y2 | DE | 7.4 kDa cold shock protein;                                                                                                                                                                           |
| N | P0A9Y2 | DE | Cold shock protein CspA;                                                                                                                                                                              |
| N | P0A9Y2 | DR | regulation of transcription, DNA-dependent                                                                                                                                                            |
| N | P0A9Y2 | DR | response to stress                                                                                                                                                                                    |
| N | P0AB41 | CC | May be involved in the regulation of biofilm formation (By similarity).                                                                                                                               |
| N | P0AB41 | DE | Multiple stress resistance protein BhsA;                                                                                                                                                              |
| N | P0AB69 | CC | The transhydrogenation between NADH and NAD <sup>+</sup> is coupled to respiration and ATP hydrolysis and functions as a proton pump across the membrane (By similarity)                              |
| N | P0AB69 | DE | NAD(P) transhydrogenase subunit beta;                                                                                                                                                                 |
| N | P0AB69 | DE | Nicotinamide nucleotide transhydrogenase subunit beta;                                                                                                                                                |
| N | P0AB69 | DE | Pyridine nucleotide transhydrogenase subunit beta;                                                                                                                                                    |
| N | P0AB69 | DR | NAD(P) <sup>+</sup> transhydrogenase (AB-specific) activity                                                                                                                                           |
| N | P0AB69 | DR | oxidation-reduction process                                                                                                                                                                           |
| N | P0ABG3 | DE | CDP-DAG synthase;                                                                                                                                                                                     |
| N | P0ABG3 | DE | CDP-DG synthase;                                                                                                                                                                                      |
| N | P0ABG3 | DE | CDP-diacylglycerol synthase;                                                                                                                                                                          |
| N | P0ABG3 | DE | CDP-diglyceride pyrophosphorylase;                                                                                                                                                                    |
| N | P0ABG3 | DE | CDP-diglyceride synthase;                                                                                                                                                                             |
| N | P0ABG3 | DE | CTP:phosphatidate cytidylyltransferase;                                                                                                                                                               |
| N | P0ABG3 | DE | Phosphatidate cytidylyltransferase;                                                                                                                                                                   |
| N | P0ABG3 | DR | phosphatidate cytidylyltransferase activity                                                                                                                                                           |
| N | P0ABG3 | DR | phospholipid biosynthetic process                                                                                                                                                                     |
| N | P0ABT2 | CC | During stationary phase, binds the chromosome non- specifically, forming a highly ordered and stable dps-DNA co- crystal within which chromosomal DNA is condensed and protected from diverse damages |
| N | P0ABT2 | CC | Also shows a weak catalase activity.                                                                                                                                                                  |
| N | P0ABT2 | CC | Dps also protects the cell from UV and gamma irradiation, iron and copper toxicity, thermal stress and acid and base shocks                                                                           |
| N | P0ABT2 | CC | It protects DNA from oxidative damage by sequestering intracellular Fe(2+) ion and storing it in the form of Fe(3+) oxyhydroxide mineral, which can be released after reduction                       |
| N | P0ABT2 | CC | One hydrogen peroxide oxidizes two Fe(2+) ions, which prevents hydroxyl radical production by the Fenton reaction                                                                                     |
| N | P0ABT2 | DE | DNA protection during starvation protein;                                                                                                                                                             |
| N | P0ABT2 | DR | cellular iron ion homeostasis                                                                                                                                                                         |
| N | P0ABT2 | DR | chromosome condensation                                                                                                                                                                               |
| N | P0ABT2 | DR | ferric iron binding                                                                                                                                                                                   |
| N | P0ABT2 | DR | oxidation-reduction process                                                                                                                                                                           |

|   |        |    |                                                                                                                                                                                                                                         |
|---|--------|----|-----------------------------------------------------------------------------------------------------------------------------------------------------------------------------------------------------------------------------------------|
| N | P0ABT2 | DR | oxidoreductase activity, oxidizing metal ions                                                                                                                                                                                           |
| N | P0ABT2 | DR | protein binding                                                                                                                                                                                                                         |
| N | P0ABT2 | DR | response to stress                                                                                                                                                                                                                      |
| N | P0AC21 | CC | Catalyzes the epimerization of carbon 2' of the side chain of dihydroneopterin triphosphate (H2NTP) to form dihydromonapterin triphosphate (H2MTP) (By similarity)                                                                      |
| N | P0AC21 | DE | D-erythro-7,8-dihydroneopterin triphosphate epimerase;                                                                                                                                                                                  |
| N | P0AC21 | DE | Dihydroneopterin triphosphate 2'-epimerase;                                                                                                                                                                                             |
| N | P0AC21 | DR | dihydroneopterin aldolase activity                                                                                                                                                                                                      |
| N | P0AC21 | DR | folic acid-containing compound metabolic process                                                                                                                                                                                        |
| N | P0AC21 | DR | isomerase activity                                                                                                                                                                                                                      |
| N | P0AC30 | CC | Not known                                                                                                                                                                                                                               |
| N | P0AC30 | CC | Is coded in an operon essential for cell division.                                                                                                                                                                                      |
| N | P0AC30 | DE | Cell division protein ftsX;                                                                                                                                                                                                             |
| N | P0AD19 | DE | Inner membrane protein yohK;                                                                                                                                                                                                            |
| N | P0ADL5 | DE | Uncharacterized protein yicN;                                                                                                                                                                                                           |
| N | P0ADT2 | DE | UPF0441 protein ygiB;                                                                                                                                                                                                                   |
| N | P0ADU2 | CC | Can oxidize menadiol to menadione.                                                                                                                                                                                                      |
| N | P0ADU2 | DE | Probable quinol monooxygenase ygiN;                                                                                                                                                                                                     |
| N | P0ADU2 | DR | antibiotic biosynthetic process                                                                                                                                                                                                         |
| N | P0ADU2 | DR | oxidation-reduction process                                                                                                                                                                                                             |
| N | P0ADU2 | DR | oxidoreductase activity                                                                                                                                                                                                                 |
| N | P0ADU2 | DR | protein binding                                                                                                                                                                                                                         |
| N | P0AE22 | CC | Dephosphorylates several organic phosphomonoesters and catalyzes the transfer of low-energy phosphate groups from phosphomonoesters to hydroxyl groups of various organic compounds                                                     |
| N | P0AE22 | CC | Might function as a broad-spectrum dephosphorylating enzyme able to scavenge both 3'- and 5'-nucleotides and also additional organic phosphomonoesters.                                                                                 |
| N | P0AE22 | CC | Preferentially acts on aryl phosphoesters                                                                                                                                                                                               |
| N | P0AE22 | DE | Class B acid phosphatase;                                                                                                                                                                                                               |
| N | P0AE22 | DR | acid phosphatase activity                                                                                                                                                                                                               |
| N | P0AE22 | DR | metal ion binding                                                                                                                                                                                                                       |
| N | P0AE22 | DR | protein binding                                                                                                                                                                                                                         |
| N | P0AEA5 | CC | Converts heme B (protoheme IX) to heme O by substitution of the vinyl group on carbon 2 of heme B porphyrin ring with a hydroxyethyl farnesyl side group.                                                                               |
| N | P0AEA5 | DE | Heme B farnesyltransferase;                                                                                                                                                                                                             |
| N | P0AEA5 | DE | Heme O synthase;                                                                                                                                                                                                                        |
| N | P0AEA5 | DE | Protoheme IX farnesyltransferase;                                                                                                                                                                                                       |
| N | P0AEA5 | DR | heme O biosynthetic process                                                                                                                                                                                                             |
| N | P0AEA5 | DR | protoheme IX farnesyltransferase activity                                                                                                                                                                                               |
| N | P0AEW6 | DE | Inosine-guanosine kinase;                                                                                                                                                                                                               |
| N | P0AEW6 | DR | hydrolase activity, acting on glycosyl bonds                                                                                                                                                                                            |
| N | P0AEW6 | DR | inosine kinase activity                                                                                                                                                                                                                 |
| N | P0AF89 | DE | Uncharacterized protein YjFY;                                                                                                                                                                                                           |
| N | P0AFE3 | CC | NDH-1 shuttles electrons from NADH, via FMN and iron- sulfur (Fe-S) centers, to quinones in the respiratory chain                                                                                                                       |
| N | P0AFE3 | CC | Couples the redox reaction to proton translocation (for every two electrons transferred, four hydrogen ions are translocated across the cytoplasmic membrane), and thus conserves the redox energy in a proton gradient (By similarity) |
| N | P0AFE3 | CC | The immediate electron acceptor for the enzyme in this species is believed to be ubiquinone                                                                                                                                             |
| N | P0AFE3 | DE | NADH dehydrogenase I subunit J;                                                                                                                                                                                                         |
| N | P0AFE3 | DE | NADH-quinone oxidoreductase subunit J;                                                                                                                                                                                                  |
| N | P0AFE3 | DE | NDH-1 subunit J;                                                                                                                                                                                                                        |
| N | P0AFE3 | DR | NADH dehydrogenase (ubiquinone) activity                                                                                                                                                                                                |
| N | P0AFE3 | DR | oxidation-reduction process                                                                                                                                                                                                             |
| N | P0AFE3 | DR | quinone binding                                                                                                                                                                                                                         |
| N | P0AFG1 | CC | Influences transcription termination and antitermination                                                                                                                                                                                |
| N | P0AFG1 | CC | Acts as a component of the transcription complex, and interacts with the termination factor rho and RNA polymerase (By similarity).                                                                                                     |
| N | P0AFG1 | DE | Transcription antitermination protein nusG;                                                                                                                                                                                             |
| N | P0AFG1 | DR | positive regulation of transcription elongation from RNA polymerase II promoter                                                                                                                                                         |
| N | P0AFG1 | DR | transcription antitermination                                                                                                                                                                                                           |
| N | P0AFG1 | DR | transcription elongation regulator activity                                                                                                                                                                                             |
| N | P0AFG1 | DR | transcription termination, DNA-dependent                                                                                                                                                                                                |

|   |        |    |                                                                                                                                                                                                         |
|---|--------|----|---------------------------------------------------------------------------------------------------------------------------------------------------------------------------------------------------------|
| N | P0AFK1 | CC | May facilitate the secretion of the peptide antibiotic microcin B17 (MccB17) by completing its maturation                                                                                               |
| N | P0AFK1 | CC | Suppresses the inhibitory activity of the carbon storage regulator (CsrA) (By similarity)                                                                                                               |
| N | P0AFK1 | DE | Protein pmbA;                                                                                                                                                                                           |
| N | P0AG21 | CC | In eubacteria ppGpp (guanosine 3'-diphosphate 5'-diphosphate) is a mediator of the stringent response that coordinates a variety of cellular activities in response to changes in nutritional abundance |
| N | P0AG21 | CC | This enzyme catalyzes the formation of pppGpp which is then hydrolyzed to form ppGpp (By similarity).                                                                                                   |
| N | P0AG21 | DE | (p)ppGpp synthase;                                                                                                                                                                                      |
| N | P0AG21 | DE | ATP:GTP 3'-pyrophosphotransferase;                                                                                                                                                                      |
| N | P0AG21 | DE | GTP pyrophosphokinase;                                                                                                                                                                                  |
| N | P0AG21 | DE | ppGpp synthase I;                                                                                                                                                                                       |
| N | P0AG21 | DR | GTP diphosphokinase activity                                                                                                                                                                            |
| N | P0AG21 | DR | amino acid binding                                                                                                                                                                                      |
| N | P0AG21 | DR | guanosine tetraphosphate metabolic process                                                                                                                                                              |
| N | P0AG21 | DR | kinase activity                                                                                                                                                                                         |
| N | P0AGF8 | CC | Acts on both serine and threonine, and properly considered as a hydroxy amino acid deaminase (By similarity).                                                                                           |
| N | P0AGF8 | DE | Threonine deaminase;                                                                                                                                                                                    |
| N | P0AGF8 | DE | Threonine dehydratase catabolic;                                                                                                                                                                        |
| N | P0AGF8 | DR | L-threonine ammonia-lyase activity                                                                                                                                                                      |
| N | P0AGF8 | DR | cellular amino acid metabolic process                                                                                                                                                                   |
| N | P0AGF8 | DR | pyridoxal phosphate binding                                                                                                                                                                             |
| N | P0AGN0 | CC | Specific, proton motive force-dependent high-affinity transporter for xanthine (By similarity).                                                                                                         |
| N | P0AGN0 | DE | Xanthine permease XanP;                                                                                                                                                                                 |
| N | P0AGN0 | DR | transmembrane transport                                                                                                                                                                                 |
| N | P0AGN0 | DR | transporter activity                                                                                                                                                                                    |
| N | P0C063 | CC | This protein is a multifunctional enzyme, able to activate and polymerize the amino acids Pro, Val, Orn and Leu                                                                                         |
| N | P0C063 | CC | Activation sites for these AA consist of individual domains.                                                                                                                                            |
| N | P0C063 | DE | ATP-dependent leucine adenylation;                                                                                                                                                                      |
| N | P0C063 | DE | ATP-dependent ornithine adenylation;                                                                                                                                                                    |
| N | P0C063 | DE | ATP-dependent proline adenylation;                                                                                                                                                                      |
| N | P0C063 | DE | ATP-dependent valine adenylation;                                                                                                                                                                       |
| N | P0C063 | DE | Gramicidin S synthase 2;                                                                                                                                                                                |
| N | P0C063 | DE | Gramicidin S synthase II;                                                                                                                                                                               |
| N | P0C063 | DE | Leucine activase;                                                                                                                                                                                       |
| N | P0C063 | DE | Ornithine activase;                                                                                                                                                                                     |
| N | P0C063 | DE | Proline activase;                                                                                                                                                                                       |
| N | P0C063 | DE | Valine activase;                                                                                                                                                                                        |
| N | P0C063 | DR | acyl carrier activity                                                                                                                                                                                   |
| N | P0C063 | DR | antibiotic biosynthetic process                                                                                                                                                                         |
| N | P0C063 | DR | cofactor binding                                                                                                                                                                                        |
| N | P0C063 | DR | hydrolase activity, acting on ester bonds                                                                                                                                                               |
| N | P0C063 | DR | ligase activity                                                                                                                                                                                         |
| N | P0C063 | DR | phosphopantetheine binding                                                                                                                                                                              |
| N | P0C0A9 | CC | Overexpression causes the formation of large vacuoles that seemed to be derived from the endoplasmic reticulum.                                                                                         |
| N | P0C0A9 | DE | Small VCP/p97-interacting protein;                                                                                                                                                                      |
| N | P0C0D3 | CC | This protein binds specifically to 23S rRNA; its binding is stimulated by other ribosomal proteins, e.g., L4, L17, and L20                                                                              |
| N | P0C0D3 | CC | It is important during the early stages of 50S assembly                                                                                                                                                 |
| N | P0C0D3 | CC | It makes multiple contacts with different domains of the 23S rRNA in the assembled 50S subunit and ribosome (By similarity).                                                                            |
| N | P0C0D3 | DE | 50S ribosomal protein L22;                                                                                                                                                                              |
| N | P0C0D3 | DR | structural constituent of ribosome                                                                                                                                                                      |
| N | P0C0M3 | CC | May catalyze the synthesis of indole-3-acetic acid (IAA)-amino acid conjugates, providing a mechanism for the plant to cope with the presence of excess auxin (By similarity).                          |
| N | P0C0M3 | DE | Auxin-responsive GH3-like protein 11;                                                                                                                                                                   |
| N | P0C0M3 | DE | Probable indole-3-acetic acid-amido synthetase GH3.11;                                                                                                                                                  |
| N | P0C0M3 | DR | ligase activity                                                                                                                                                                                         |
| N | P0C0M3 | DR | response to auxin stimulus                                                                                                                                                                              |



|   |        |    |                                                                                                                                                              |
|---|--------|----|--------------------------------------------------------------------------------------------------------------------------------------------------------------|
| N | P0C0M3 | DR | response to light stimulus                                                                                                                                   |
| N | P0C0P9 | CC | Cysteine protease able to cleave elastin, insulin, myoglobin, fibronectin, fibrinogen, HMW-kininogen, alpha-1- protease inhibitor and alpha-1-antitrypsin    |
| N | P0C0P9 | CC | Along with other extracellular proteases may contribute to the colonization and infection of human tissues.                                                  |
| N | P0C0P9 | DE | Extracellular cysteine protease;                                                                                                                             |
| N | P0C0P9 | DR | cysteine-type endopeptidase activity                                                                                                                         |
| N | P0C0Y3 | CC | Binds to actin and affects the structure of the cytoskeleton                                                                                                 |
| N | P0C0Y3 | CC | At high concentrations, profilin prevents the polymerization of actin, whereas it enhances it at low concentrations                                          |
| N | P0C0Y3 | CC | By binding to PIP2, it inhibits the formation of IP3 and DG (By similarity).                                                                                 |
| N | P0C0Y3 | DE | Fra a 4;                                                                                                                                                     |
| N | P0C0Y3 | DR | actin binding                                                                                                                                                |
| N | P0C0Y3 | DR | actin cytoskeleton organization                                                                                                                              |
| N | P0C174 | CC | Not toxic to mouse.                                                                                                                                          |
| N | P0C174 | DE | Peptide TsPep1;                                                                                                                                              |
| N | P0C193 | CC | Prevents misfolding and promotes the refolding and proper assembly of unfolded polypeptides generated under stress conditions (By similarity).               |
| N | P0C193 | DE | 60 kDa chaperonin;                                                                                                                                           |
| N | P0C193 | DE | GroEL protein;                                                                                                                                               |
| N | P0C193 | DE | Protein Cpn60;                                                                                                                                               |
| N | P0C193 | DR | protein refolding                                                                                                                                            |
| N | P0C1A5 | CC | Involved in maceration and soft-rotting of plant tissue                                                                                                      |
| N | P0C1A5 | CC | Pectate lyases have been implicated as pathogenicity factors which induce maceration or rotting of plant tissue                                              |
| N | P0C1A5 | CC | PelE is sufficient to induce these effects under laboratory conditions.                                                                                      |
| N | P0C1A5 | DE | Pectate lyase E;                                                                                                                                             |
| N | P0C1A5 | DR | metal ion binding                                                                                                                                            |
| N | P0C1A5 | DR | pectate lyase activity                                                                                                                                       |
| N | P0C1U8 | CC | Preferentially cleaves peptide bonds on the carboxyl- terminal side of aspartate and glutamate                                                               |
| N | P0C1U8 | CC | Along with other extracellular proteases it is involved in colonization and infection of human tissues                                                       |
| N | P0C1U8 | CC | It is the most important protease for degradation of fibronectin-binding protein (FnBP) and surface protein A, which are involved in adherence to host cells |
| N | P0C1U8 | CC | May also protect bacteria against host defense mechanism by cleaving the immunoglobulin classes IgG, IgA and IgM                                             |
| N | P0C1U8 | CC | May be involved in the stability of secreted lipases.                                                                                                        |
| N | P0C1U8 | CC | Required for proteolytic maturation of thiol protease sspB and inactivation of sspC, an inhibitor of sspB                                                    |
| N | P0C1U8 | DE | Endoproteinase Glu-C;                                                                                                                                        |
| N | P0C1U8 | DE | Glutamyl endopeptidase;                                                                                                                                      |
| N | P0C1U8 | DE | Staphylococcal serine proteinase;                                                                                                                            |
| N | P0C1U8 | DE | V8 protease;                                                                                                                                                 |
| N | P0C1U8 | DE | V8 proteinase;                                                                                                                                               |
| N | P0C1U8 | DR | serine-type endopeptidase activity                                                                                                                           |
| N | P0C1Y0 | DE | Beta-galactosidase;                                                                                                                                          |
| N | P0C1Y0 | DR | beta-galactosidase activity                                                                                                                                  |
| N | P0C1Y0 | DR | carbohydrate binding                                                                                                                                         |
| N | P0C1Y0 | DR | carbohydrate metabolic process                                                                                                                               |
| N | P0C1Y0 | DR | cation binding                                                                                                                                               |
| N | P0C2D5 | CC | Catalyzes an oxidative deamination of predominantly hydrophobic and aromatic L-amino acids                                                                   |
| N | P0C2D5 | CC | Has an ability to induce hemolysis and apoptosis.                                                                                                            |
| N | P0C2D5 | CC | Has an ability to induce hemorrhage                                                                                                                          |
| N | P0C2D5 | CC | Has an antibacterial activity (By similarity)                                                                                                                |
| N | P0C2D5 | CC | Inhibits platelet aggregation                                                                                                                                |
| N | P0C2D5 | DE | Apoxin I-like protein;                                                                                                                                       |
| N | P0C2D5 | DE | L-amino-acid oxidase;                                                                                                                                        |
| N | P0C2D5 | DR | L-amino-acid oxidase activity                                                                                                                                |
| N | P0C2D5 | DR | blood coagulation                                                                                                                                            |
| N | P0C2D5 | DR | defense response to bacterium                                                                                                                                |
| N | P0C2D5 | DR | hemolysis in other organism                                                                                                                                  |
| N | P0C2D5 | DR | oxidation-reduction process                                                                                                                                  |
| N | P0C2P9 | DE | Truncated 4.9 kDa accessory protein;                                                                                                                         |

|   |        |    |                                                                                                                                                                                           |
|---|--------|----|-------------------------------------------------------------------------------------------------------------------------------------------------------------------------------------------|
| N | P0C2P9 | DE | Truncated non-structural protein of 4.9 kDa;                                                                                                                                              |
| N | P0C2P9 | DE | Truncated ns4.9;                                                                                                                                                                          |
| N | P0C308 | DE | Uncharacterized protein ycf72;                                                                                                                                                            |
| N | P0C498 | CC | DNA-dependent RNA polymerase catalyzes the transcription of DNA into RNA using the four ribonucleoside triphosphates as substrates.                                                       |
| N | P0C498 | DE | DNA-directed RNA polymerase subunit alpha;                                                                                                                                                |
| N | P0C498 | DE | Plastid-encoded RNA polymerase subunit alpha;                                                                                                                                             |
| N | P0C498 | DE | RNA polymerase subunit alpha;                                                                                                                                                             |
| N | P0C498 | DR | DNA-directed RNA polymerase activity                                                                                                                                                      |
| N | P0C498 | DR | protein dimerization activity                                                                                                                                                             |
| N | P0C5Y9 | CC | Atypical histone H2A which can replace conventional H2A in some nucleosomes                                                                                                               |
| N | P0C5Y9 | CC | DNA accessibility is regulated via a complex set of post-translational modifications of histones, also called histone code, and nucleosome remodeling                                     |
| N | P0C5Y9 | CC | Histones thereby play a central role in transcription regulation, DNA repair, DNA replication and chromosomal stability                                                                   |
| N | P0C5Y9 | CC | Nucleosomes containing this histone are less rigid and organize only 118 base pair of DNA instead of 147 in classical nucleosomes                                                         |
| N | P0C5Y9 | CC | Nucleosomes wrap and compact DNA into chromatin, limiting DNA accessibility to the cellular machineries which require DNA as a template                                                   |
| N | P0C5Y9 | CC | They are associated with transcriptionally active chromatin and excluded from Barr bodies.                                                                                                |
| N | P0C5Y9 | DE | H2A Barr body-deficient;                                                                                                                                                                  |
| N | P0C5Y9 | DE | Histone H2A-Bbd type 1;                                                                                                                                                                   |
| N | P0C5Y9 | DR | nucleosome assembly                                                                                                                                                                       |
| N | P0C601 | CC | The 2-oxoglutarate dehydrogenase complex catalyzes the overall conversion of 2-oxoglutarate to succinyl-CoA and CO(2)                                                                     |
| N | P0C601 | CC | It contains multiple copies of three enzymatic components: 2-oxoglutarate dehydrogenase (E1), dihydrolipoamide succinyltransferase (E2) and lipoamide dehydrogenase (E3) (By similarity). |
| N | P0C601 | DE | 2-oxoglutarate dehydrogenase E1 component;                                                                                                                                                |
| N | P0C601 | DE | Alpha-ketoglutarate dehydrogenase;                                                                                                                                                        |
| N | P0C601 | DR | oxidation-reduction process                                                                                                                                                               |
| N | P0C601 | DR | oxoglutarate dehydrogenase (succinyl-transferring) activity                                                                                                                               |
| N | P0C601 | DR | thiamine pyrophosphate binding                                                                                                                                                            |
| N | P0C6F2 | CC | Capsid protein p24 forms the conical core that encapsulates the genomic RNA-nucleocapsid complex in the virion                                                                            |
| N | P0C6F2 | CC | Gag-Pol polyprotein and Gag polyprotein may regulate their own translation, by the binding genomic RNA in the 5'-UTR                                                                      |
| N | P0C6F2 | CC | Integrase catalyzes viral DNA integration into the host chromosome, by performing a series of DNA cutting and joining reactions                                                           |
| N | P0C6F2 | CC | The aspartyl protease mediates proteolytic cleavages of Gag and Gag-Pol polyproteins during or shortly after the release of the virion from the plasma membrane                           |
| N | P0C6F2 | CC | A Y-shaped, gapped, recombination intermediate results, with the 5'-ends of the viral DNA strands and the 3' ends of target DNA strands remaining unjoined, flanking a gap of 5 bp        |
| N | P0C6F2 | CC | Also cleaves Nef and Vif, probably concomitantly with viral structural proteins on maturation of virus particles (By similarity).                                                         |
| N | P0C6F2 | CC | Alternatively, Integrase may catalyze the excision of viral DNA just after strand transfer, this is termed disintegration (By similarity).                                                |
| N | P0C6F2 | CC | At low concentration, Gag-Pol and Gag would promote translation, whereas at high concentration, the polyproteins encapsidate genomic RNA and then shut off translation (By similarity).   |
| N | P0C6F2 | CC | Cleavages take place as an ordered, step-wise cascade to yield mature proteins                                                                                                            |
| N | P0C6F2 | CC | Displays maximal activity during the budding process just prior to particle release from the cell                                                                                         |
| N | P0C6F2 | CC | In the second step, the PIC enters cell nucleus                                                                                                                                           |
| N | P0C6F2 | CC | In the third step, termed strand transfer, the integrase protein joins the previously processed 3' ends to the 5' ends of strands of target cellular DNA at the site of integration       |
| N | P0C6F2 | CC | Interaction with human PPIA/CYPA protects the virus from restriction by human TRIM5-alpha and from an unknown antiviral activity in human cells                                           |
| N | P0C6F2 | CC | Most core are conical, with only 7% tubular                                                                                                                                               |
| N | P0C6F2 | CC | Since this process occurs at both cuts flanking the HIV genome, a 5 bp duplication of host DNA is produced at the ends of HIV-1 integration                                               |
| N | P0C6F2 | CC | The 5'-ends are produced by integrase-catalyzed staggered cuts, 5 bp apart                                                                                                                |

|   |        |    |                                                                                                                                                                                                  |
|---|--------|----|--------------------------------------------------------------------------------------------------------------------------------------------------------------------------------------------------|
| N | P0C6F2 | CC | The core is constituted by capsid protein hexamer subunits                                                                                                                                       |
| N | P0C6F2 | CC | The core is disassembled soon after virion entry                                                                                                                                                 |
| N | P0C6F2 | CC | The first step in the integration process is 3' processing                                                                                                                                       |
| N | P0C6F2 | CC | The integrase protein removes 2 nucleotides from each 3' end of the viral DNA, leaving recessed CA OH's at the 3' ends                                                                           |
| N | P0C6F2 | CC | The last step is viral DNA integration into host chromosome                                                                                                                                      |
| N | P0C6F2 | CC | This ability to enter the nucleus is specific of lentiviruses, other retroviruses cannot and rely on cell division to access cell chromosomes                                                    |
| N | P0C6F2 | CC | This capsid restriction by TRIM5 is one of the factors which restricts HIV-1 to the human species (By similarity).                                                                               |
| N | P0C6F2 | CC | This complex is called the pre- integration complex (PIC)                                                                                                                                        |
| N | P0C6F2 | CC | This enzyme activity takes place after virion entry into a cell and reverse transcription of the RNA genome in dsDNA                                                                             |
| N | P0C6F2 | CC | This involves host DNA repair synthesis in which the 5 bp gaps between the unjoined strands are filled in and then ligated                                                                       |
| N | P0C6F2 | CC | This process is called maturation                                                                                                                                                                |
| N | P0C6F2 | CC | This process is mediated through integrase and Vpr proteins, and allows the virus to infect a non dividing cell                                                                                  |
| N | P0C6F2 | CC | This step requires a complex comprising the viral genome, matrix protein, Vpr and integrase                                                                                                      |
| N | P0C6F2 | DE | Capsid protein p24;                                                                                                                                                                              |
| N | P0C6F2 | DE | Exoribonuclease H;                                                                                                                                                                               |
| N | P0C6F2 | DE | Gag-Pol polyprotein;                                                                                                                                                                             |
| N | P0C6F2 | DE | Integrase;                                                                                                                                                                                       |
| N | P0C6F2 | DE | Matrix protein p17;                                                                                                                                                                              |
| N | P0C6F2 | DE | Nucleocapsid protein p7;                                                                                                                                                                         |
| N | P0C6F2 | DE | Pr160Gag-Pol;                                                                                                                                                                                    |
| N | P0C6F2 | DE | Retropepsin;                                                                                                                                                                                     |
| N | P0C6F2 | DE | Reverse transcriptase/ribonuclease H;                                                                                                                                                            |
| N | P0C6F2 | DE | Spacer peptide p2;                                                                                                                                                                               |
| N | P0C6F2 | DE | Transframe peptide;                                                                                                                                                                              |
| N | P0C6F2 | DR | DNA integration                                                                                                                                                                                  |
| N | P0C6F2 | DR | DNA recombination                                                                                                                                                                                |
| N | P0C6F2 | DR | DNA-directed DNA polymerase activity                                                                                                                                                             |
| N | P0C6F2 | DR | RNA-dependent DNA replication                                                                                                                                                                    |
| N | P0C6F2 | DR | RNA-directed DNA polymerase activity                                                                                                                                                             |
| N | P0C6F2 | DR | aspartic-type endopeptidase activity                                                                                                                                                             |
| N | P0C6F2 | DR | exoribonuclease H activity                                                                                                                                                                       |
| N | P0C6F2 | DR | integrase activity                                                                                                                                                                               |
| N | P0C6F2 | DR | ribonuclease H activity                                                                                                                                                                          |
| N | P0C6F2 | DR | structural molecule activity                                                                                                                                                                     |
| N | P0C6F2 | DR | viral procapsid maturation                                                                                                                                                                       |
| N | P0C6F2 | DR | zinc ion binding                                                                                                                                                                                 |
| N | P0C6G1 | CC | Pathogenicity determinant (By similarity)                                                                                                                                                        |
| N | P0C6G1 | CC | May act as a suppressor of RNA-mediated gene silencing, also known as post-transcriptional gene silencing (PTGS), a mechanism of plant viral defense that limits the accumulation of viral RNAs. |
| N | P0C6G1 | DE | Protein AC4;                                                                                                                                                                                     |
| N | P0C6G1 | DE | Protein AL4;                                                                                                                                                                                     |
| N | P0C6R7 | CC | Inhibits ADP-induced human platelet aggregation.                                                                                                                                                 |
| N | P0C6R7 | DE | Disintegrin pyramidin-A;                                                                                                                                                                         |
| N | P0C6R7 | DR | blood coagulation                                                                                                                                                                                |
| N | P0C6R7 | DR | cell adhesion                                                                                                                                                                                    |
| N | P0C723 | CC | Enhances the ability of BRLF1 to induce lytic infection by cooperating with it to transcriptionally activate the BZLF1 promoter (By similarity).                                                 |
| N | P0C723 | DE | Transcriptional activator BRRF1;                                                                                                                                                                 |
| N | P0C7K6 | CC | May serve as a metalloproteinase inhibitor during glandular storage                                                                                                                              |
| N | P0C7K6 | CC | Their inhibition may be instantly disengaged, by dilution or physiochemical change, when venom is injected into tissue of the victim (By similarity).                                            |
| N | P0C7K6 | DE | Poly-His-poly-Gly peptide 2;                                                                                                                                                                     |
| N | P0C7K6 | DR | metalloendopeptidase inhibitor activity                                                                                                                                                          |
| N | P0C7Q1 | DE | Coiled-coil domain-containing protein 153;                                                                                                                                                       |
| N | P0C7R5 | CC | Catalyzes the reversible oxidation of malate to oxaloacetate (By similarity).                                                                                                                    |
| N | P0C7R5 | DE | Malate dehydrogenase;                                                                                                                                                                            |
| N | P0C7R5 | DR | L-malate dehydrogenase activity                                                                                                                                                                  |

|   |        |    |                                                                                                                                                                                    |
|---|--------|----|------------------------------------------------------------------------------------------------------------------------------------------------------------------------------------|
| N | P0C7R5 | DR | cellular carbohydrate metabolic process                                                                                                                                            |
| N | P0C7R5 | DR | malate metabolic process                                                                                                                                                           |
| N | P0C7R5 | DR | tricarboxylic acid cycle                                                                                                                                                           |
| N | P0C7X9 | CC | Peptide which can recruit, activate and subsequently lyse human neutrophils, thus eliminating the main cellular defense against infection (By similarity).                         |
| N | P0C7X9 | DE | Phenol-soluble modulin alpha 1 peptide;                                                                                                                                            |
| N | P0C7Y5 | CC | Peptide which can recruit, activate and subsequently lyse human neutrophils, thus eliminating the main cellular defense against infection (By similarity).                         |
| N | P0C7Y5 | DE | Phenol-soluble modulin alpha 1 peptide;                                                                                                                                            |
| N | P0C7Y8 | CC | Peptide which can recruit, activate and subsequently lyse human neutrophils, thus eliminating the main cellular defense against infection (By similarity).                         |
| N | P0C7Y8 | DE | Phenol-soluble modulin alpha 1 peptide;                                                                                                                                            |
| N | P0C867 | DE | Putative uncharacterized protein LOC100130201;                                                                                                                                     |
| N | P0C9E4 | DE | Viral histone-like protein A104R;                                                                                                                                                  |
| N | P0C9F1 | CC | Plays a role in virus cell tropism, and may be required for efficient virus replication in macrophages (By similarity).                                                            |
| N | P0C9F1 | DE | Protein MGF 100-1R;                                                                                                                                                                |
| N | P0C9L1 | CC | Plays a role in virus cell tropism, and may be required for efficient virus replication in macrophages (By similarity).                                                            |
| N | P0C9L1 | DE | Protein MGF 300-2R;                                                                                                                                                                |
| N | P0C9N0 | CC | Plays a role in virus cell tropism, and may be required for efficient virus replication in macrophages (By similarity).                                                            |
| N | P0C9N0 | DE | Protein MGF 360-4L;                                                                                                                                                                |
| N | P0C9Q8 | CC | Plays a role in virus cell tropism, and may be required for efficient virus replication in macrophages (By similarity).                                                            |
| N | P0C9Q8 | DE | Protein MGF 360-15R;                                                                                                                                                               |
| N | P0CA35 | DE | Uncharacterized protein B125R;                                                                                                                                                     |
| N | P0CAE3 | DE | Transmembrane protein I329L;                                                                                                                                                       |
| N | P0CAL5 | DE | Transmembrane protein EP84R;                                                                                                                                                       |
| N | P0CAT2 | CC | Mitochondrial carrier required during erythropoiesis                                                                                                                               |
| N | P0CAT2 | CC | May act by importing glycine into mitochondria or by exchanging glycine for ALA across the mitochondrial inner membrane (By similarity).                                           |
| N | P0CAT2 | CC | Probably involved in the biosynthesis of heme, possibly by facilitating 5-aminolevulinate (ALA) production                                                                         |
| N | P0CAT2 | DE | Solute carrier family 25 member 38-B;                                                                                                                                              |
| N | P0CAT2 | DR | erythrocyte differentiation                                                                                                                                                        |
| N | P0CAT2 | DR | transmembrane transport                                                                                                                                                            |
| N | P0CB88 | CC | Accessory subunit of the mitochondrial membrane respiratory chain NADH dehydrogenase (Complex I), that is believed not to be involved in catalysis                                 |
| N | P0CB88 | CC | Complex I functions in the transfer of electrons from NADH to the respiratory chain                                                                                                |
| N | P0CB88 | CC | The immediate electron acceptor for the enzyme is believed to be ubiquinone (By similarity).                                                                                       |
| N | P0CB88 | DE | Complex I-15 kDa;                                                                                                                                                                  |
| N | P0CB88 | DE | NADH dehydrogenase [ubiquinone] iron-sulfur protein 5;                                                                                                                             |
| N | P0CB88 | DE | NADH-ubiquinone oxidoreductase 15 kDa subunit;                                                                                                                                     |
| N | P0CB88 | DR | electron transport chain                                                                                                                                                           |
| N | P0CB88 | DR | mitochondrial respiratory chain complex I assembly                                                                                                                                 |
| N | P0CB94 | CC | Accessory subunit of the mitochondrial membrane respiratory chain NADH dehydrogenase (Complex I), that is believed not to be involved in catalysis                                 |
| N | P0CB94 | CC | Complex I functions in the transfer of electrons from NADH to the respiratory chain                                                                                                |
| N | P0CB94 | CC | The immediate electron acceptor for the enzyme is believed to be ubiquinone (By similarity).                                                                                       |
| N | P0CB94 | DE | Complex I-B17;                                                                                                                                                                     |
| N | P0CB94 | DE | NADH dehydrogenase [ubiquinone] 1 beta subcomplex subunit 6;                                                                                                                       |
| N | P0CB94 | DE | NADH-ubiquinone oxidoreductase B17 subunit;                                                                                                                                        |
| N | P0CB94 | DR | electron transport chain                                                                                                                                                           |
| N | P0CC20 | CC | NDH shuttles electrons from NAD(P)H:plastoquinone, via FMN and iron-sulfur (Fe-S) centers, to quinones in the photosynthetic chain and possibly in a chloroplast respiratory chain |
| N | P0CC20 | CC | Couples the redox reaction to proton translocation, and thus conserves the redox energy in a proton gradient (By similarity).                                                      |
| N | P0CC20 | CC | The immediate electron acceptor for the enzyme in this species is believed to be plastoquinone                                                                                     |
| N | P0CC20 | DE | NAD(P)H dehydrogenase, subunit 2 A;                                                                                                                                                |
| N | P0CC20 | DE | NAD(P)H-quinone oxidoreductase subunit 2 A, chloroplastic;                                                                                                                         |

|   |        |    |                                                                                                                                                                                                                                                                                                                                                                                                                                                                                                                                                                                                                                                     |
|---|--------|----|-----------------------------------------------------------------------------------------------------------------------------------------------------------------------------------------------------------------------------------------------------------------------------------------------------------------------------------------------------------------------------------------------------------------------------------------------------------------------------------------------------------------------------------------------------------------------------------------------------------------------------------------------------|
| N | P0CC20 | DE | NADH-plastoquinone oxidoreductase subunit 2 A;                                                                                                                                                                                                                                                                                                                                                                                                                                                                                                                                                                                                      |
| N | P0CC20 | DR | ATP synthesis coupled electron transport                                                                                                                                                                                                                                                                                                                                                                                                                                                                                                                                                                                                            |
| N | P0CC20 | DR | NADH dehydrogenase (ubiquinone) activity                                                                                                                                                                                                                                                                                                                                                                                                                                                                                                                                                                                                            |
| N | P0CC20 | DR | quinone binding                                                                                                                                                                                                                                                                                                                                                                                                                                                                                                                                                                                                                                     |
| N | P0CE31 | CC | Alpha-conotoxins act on postsynaptic membranes, they bind to the nicotinic acetylcholine receptors (nAChR) and thus inhibit them                                                                                                                                                                                                                                                                                                                                                                                                                                                                                                                    |
| N | P0CE31 | CC | This toxin specifically blocks mammalian neuronal nAChR of the alpha-7/CHRNA7, alpha-3-beta-2/CHRNA3-CHRNA2 and alpha-4-beta-2/CHRNA4-CHRNA2 subtypes (By similarity).                                                                                                                                                                                                                                                                                                                                                                                                                                                                              |
| N | P0CE31 | DE | Alpha-conotoxin-like M120.2;                                                                                                                                                                                                                                                                                                                                                                                                                                                                                                                                                                                                                        |
| N | P0CE31 | DR | acetylcholine receptor inhibitor activity                                                                                                                                                                                                                                                                                                                                                                                                                                                                                                                                                                                                           |
| N | P0CE31 | DR | synaptic transmission                                                                                                                                                                                                                                                                                                                                                                                                                                                                                                                                                                                                                               |
| N | P0CF16 | DE | UPF0507 protein YML003W;                                                                                                                                                                                                                                                                                                                                                                                                                                                                                                                                                                                                                            |
| N | P0CG40 | CC | Transcription factor which plays a key role in limb development                                                                                                                                                                                                                                                                                                                                                                                                                                                                                                                                                                                     |
| N | P0CG40 | CC | Positively regulates FGF8 expression in the apical ectodermal ridge (AER) and contributes to limb outgrowth in embryos (By similarity).                                                                                                                                                                                                                                                                                                                                                                                                                                                                                                             |
| N | P0CG40 | DE | Transcription factor Sp9;                                                                                                                                                                                                                                                                                                                                                                                                                                                                                                                                                                                                                           |
| N | P0CG40 | DR | zinc ion binding                                                                                                                                                                                                                                                                                                                                                                                                                                                                                                                                                                                                                                    |
| N | P0CG64 | CC | Ubiquitin exists either covalently attached to another protein, or free                                                                                                                                                                                                                                                                                                                                                                                                                                                                                                                                                                             |
| N | P0CG64 | CC | Linear polymer chains formed via attachment by the initiator Met lead to cell signaling                                                                                                                                                                                                                                                                                                                                                                                                                                                                                                                                                             |
| N | P0CG64 | CC | Polyubiquitin chains, when attached to a target protein, have different functions depending on the Lys residue of the ubiquitin that is linked: Lys-6-linked may be involved in DNA repair; Lys-11-linked is involved in ERAD (endoplasmic reticulum-associated degradation) and in cell-cycle regulation; Lys-29-linked is involved in lysosomal degradation; Lys-33-linked is involved in kinase modification; Lys-48-linked is involved in protein degradation via the proteasome; Lys-63-linked is involved in endocytosis, DNA-damage responses as well as in signaling processes leading to activation of the transcription factor NF-kappa-B |
| N | P0CG64 | CC | Ubiquitin is usually conjugated to Lys residues of target proteins, however, in rare cases, conjugation to Cys or Ser residues has been observed                                                                                                                                                                                                                                                                                                                                                                                                                                                                                                    |
| N | P0CG64 | CC | When covalently bound, it is conjugated to target proteins via an isopeptide bond either as a monomer (monoubiquitin), a polymer linked via different Lys residues of the ubiquitin (polyubiquitin chains) or a linear polymer linked via the initiator Met of the ubiquitin (linear polyubiquitin chains)                                                                                                                                                                                                                                                                                                                                          |
| N | P0CG64 | CC | When polyubiquitin is free (unanchored-polyubiquitin), it also has distinct roles, such as in activation of protein kinases, and in signaling (By similarity).                                                                                                                                                                                                                                                                                                                                                                                                                                                                                      |
| N | P0CG64 | DE | Polyubiquitin-C;                                                                                                                                                                                                                                                                                                                                                                                                                                                                                                                                                                                                                                    |
| N | P0CG64 | DE | Ubiquitin;                                                                                                                                                                                                                                                                                                                                                                                                                                                                                                                                                                                                                                          |
| N | P0CH25 | CC | Involved in oxygen transport from the lung to the various peripheral tissues (By similarity).                                                                                                                                                                                                                                                                                                                                                                                                                                                                                                                                                       |
| N | P0CH25 | DE | Alpha-1-globin;                                                                                                                                                                                                                                                                                                                                                                                                                                                                                                                                                                                                                                     |
| N | P0CH25 | DE | Hemoglobin alpha-1 chain;                                                                                                                                                                                                                                                                                                                                                                                                                                                                                                                                                                                                                           |
| N | P0CH25 | DE | Hemoglobin subunit alpha-1;                                                                                                                                                                                                                                                                                                                                                                                                                                                                                                                                                                                                                         |
| N | P0CH25 | DR | oxygen binding                                                                                                                                                                                                                                                                                                                                                                                                                                                                                                                                                                                                                                      |
| N | P0CH25 | DR | oxygen transporter activity                                                                                                                                                                                                                                                                                                                                                                                                                                                                                                                                                                                                                         |
| N | P0CI23 | CC | Inhibits the neuronal noradrenaline transporter (NET) (By similarity).                                                                                                                                                                                                                                                                                                                                                                                                                                                                                                                                                                              |
| N | P0CI23 | DE | Chi-conotoxin-like Ar1311;                                                                                                                                                                                                                                                                                                                                                                                                                                                                                                                                                                                                                          |
| N | P0CI41 | CC | Omega-conotoxin that blocks voltage-gated calcium channels                                                                                                                                                                                                                                                                                                                                                                                                                                                                                                                                                                                          |
| N | P0CI41 | CC | Does not modify the voltage dependency of activation nor of inactivation.                                                                                                                                                                                                                                                                                                                                                                                                                                                                                                                                                                           |
| N | P0CI41 | CC | Reversibly blocks calcium current in the dorsal-root ganglion neurons of the rat (high voltage-activated channels but not low voltage-activated channels)                                                                                                                                                                                                                                                                                                                                                                                                                                                                                           |
| N | P0CI41 | DE | Conotoxin CalTx;                                                                                                                                                                                                                                                                                                                                                                                                                                                                                                                                                                                                                                    |
| N | P0CI41 | DE | Omega-conotoxin CI15a;                                                                                                                                                                                                                                                                                                                                                                                                                                                                                                                                                                                                                              |
| N | P0CI41 | DE | Omega-conotoxin CI16a;                                                                                                                                                                                                                                                                                                                                                                                                                                                                                                                                                                                                                              |
| N | P0CI41 | DR | calcium channel inhibitor activity                                                                                                                                                                                                                                                                                                                                                                                                                                                                                                                                                                                                                  |
| N | P0CL23 | DE | Putative UPF0377 protein YIL175W;                                                                                                                                                                                                                                                                                                                                                                                                                                                                                                                                                                                                                   |
| N | P10219 | CC | Participates in the assembly of the infectious particles by decorating the outer surface of the capsid shell and thus forming a layer between the capsid and the tegument                                                                                                                                                                                                                                                                                                                                                                                                                                                                           |
| N | P10219 | CC | Complexes composed of the capsid protein VP5 and VP26 assemble together in the host cytoplasm and are translocated to the nucleus, where they accumulate and participate in capsid assembly.                                                                                                                                                                                                                                                                                                                                                                                                                                                        |
| N | P10219 | DE | Capsid protein VP26;                                                                                                                                                                                                                                                                                                                                                                                                                                                                                                                                                                                                                                |
| N | P10294 | CC | Inhibits trypsin.                                                                                                                                                                                                                                                                                                                                                                                                                                                                                                                                                                                                                                   |
| N | P10294 | DE | Trypsin inhibitor 1;                                                                                                                                                                                                                                                                                                                                                                                                                                                                                                                                                                                                                                |
| N | P10294 | DE | Trypsin inhibitor I;                                                                                                                                                                                                                                                                                                                                                                                                                                                                                                                                                                                                                                |

|   |        |    |                                                                                                                                                                                                                                              |
|---|--------|----|----------------------------------------------------------------------------------------------------------------------------------------------------------------------------------------------------------------------------------------------|
| N | P10294 | DR | serine-type endopeptidase inhibitor activity                                                                                                                                                                                                 |
| N | P10334 | CC | This protein is transferred from male to female during mating and may affect egg-laying and behavior after mating.                                                                                                                           |
| N | P10334 | DE | Accessory gland-specific peptide 26Ab;                                                                                                                                                                                                       |
| N | P10334 | DE | Male accessory gland secretory protein 355B;                                                                                                                                                                                                 |
| N | P10334 | DR | mating behavior                                                                                                                                                                                                                              |
| N | P10432 | DE | Putative uncharacterized immunity region protein 9;                                                                                                                                                                                          |
| N | P10493 | CC | Sulfated glycoprotein widely distributed in basement membranes and tightly associated with laminin                                                                                                                                           |
| N | P10493 | CC | Also binds to collagen IV and perlecan                                                                                                                                                                                                       |
| N | P10493 | CC | It probably has a role in cell- extracellular matrix interactions.                                                                                                                                                                           |
| N | P10493 | DR | bioluminescence                                                                                                                                                                                                                              |
| N | P10493 | DR | calcium ion binding                                                                                                                                                                                                                          |
| N | P10493 | DR | cell-matrix adhesion                                                                                                                                                                                                                         |
| N | P10493 | DR | protein binding                                                                                                                                                                                                                              |
| N | P10493 | DR | protein-chromophore linkage                                                                                                                                                                                                                  |
| N | P10630 | CC | ATP-dependent RNA helicase which is a subunit of the eIF4F complex involved in cap recognition and is required for mRNA binding to ribosome                                                                                                  |
| N | P10630 | CC | In the current model of translation initiation, eIF4A unwinds RNA secondary structures in the 5'-UTR of mRNAs which is necessary to allow efficient binding of the small ribosomal subunit, and subsequent scanning for the initiator codon. |
| N | P10630 | DE | ATP-dependent RNA helicase eIF4A-2;                                                                                                                                                                                                          |
| N | P10630 | DE | Eukaryotic initiation factor 4A-II;                                                                                                                                                                                                          |
| N | P10630 | DR | ATP-dependent helicase activity                                                                                                                                                                                                              |
| N | P10630 | DR | response to protein stimulus                                                                                                                                                                                                                 |
| N | P10630 | DR | translation initiation factor activity                                                                                                                                                                                                       |
| N | P10937 | CC | Converts noradrenaline to adrenaline.                                                                                                                                                                                                        |
| N | P10937 | DE | Noradrenaline N-methyltransferase;                                                                                                                                                                                                           |
| N | P10937 | DE | Phenylethanolamine N-methyltransferase;                                                                                                                                                                                                      |
| N | P10937 | DR | S-adenosylhomocysteine metabolic process                                                                                                                                                                                                     |
| N | P10937 | DR | S-adenosylmethionine metabolic process                                                                                                                                                                                                       |
| N | P10937 | DR | epinephrine biosynthetic process                                                                                                                                                                                                             |
| N | P10937 | DR | norepinephrine metabolic process                                                                                                                                                                                                             |
| N | P10937 | DR | phenylethanolamine N-methyltransferase activity                                                                                                                                                                                              |
| N | P11154 | CC | Pyruvate carboxylase catalyzes a 2-step reaction, involving the ATP-dependent carboxylation of the covalently attached biotin in the first step and the transfer of the carboxyl group to pyruvate in the second.                            |
| N | P11154 | DE | Pyruvate carboxylase 1;                                                                                                                                                                                                                      |
| N | P11154 | DE | Pyruvic carboxylase 1;                                                                                                                                                                                                                       |
| N | P11154 | DR | biotin carboxylase activity                                                                                                                                                                                                                  |
| N | P11154 | DR | gluconeogenesis                                                                                                                                                                                                                              |
| N | P11154 | DR | metal ion binding                                                                                                                                                                                                                            |
| N | P11154 | DR | protein binding                                                                                                                                                                                                                              |
| N | P11154 | DR | pyruvate carboxylase activity                                                                                                                                                                                                                |
| N | P11610 | CC | Antigen-presenting protein that binds self and non-self glycolipids and presents them to T-cell receptors on natural killer T-cells.                                                                                                         |
| N | P11610 | DE | Antigen-presenting glycoprotein CD1d2;                                                                                                                                                                                                       |
| N | P11610 | DE | CD1d.2;                                                                                                                                                                                                                                      |
| N | P11610 | DR | antigen processing and presentation                                                                                                                                                                                                          |
| N | P11610 | DR | innate immune response                                                                                                                                                                                                                       |
| N | P11610 | DR | positive regulation of NK T cell activation                                                                                                                                                                                                  |
| N | P11610 | DR | positive regulation of T cell mediated cytotoxicity                                                                                                                                                                                          |
| N | P11610 | DR | positive regulation of interleukin-2 biosynthetic process                                                                                                                                                                                    |
| N | P11610 | DR | positive regulation of interleukin-4 biosynthetic process                                                                                                                                                                                    |
| N | P11680 | CC | A positive regulator of the alternate pathway of complement                                                                                                                                                                                  |
| N | P11680 | CC | It binds to and stabilizes the C3- and C5-convertase enzyme complexes.                                                                                                                                                                       |
| N | P11680 | DE | Complement factor P;                                                                                                                                                                                                                         |
| N | P11680 | DR | complement activation, alternative pathway                                                                                                                                                                                                   |
| N | P11708 | DE | Cytosolic malate dehydrogenase;                                                                                                                                                                                                              |
| N | P11708 | DE | Malate dehydrogenase, cytoplasmic;                                                                                                                                                                                                           |
| N | P11708 | DR | L-malate dehydrogenase activity                                                                                                                                                                                                              |
| N | P11708 | DR | cellular carbohydrate metabolic process                                                                                                                                                                                                      |
| N | P11708 | DR | malate metabolic process                                                                                                                                                                                                                     |
| N | P11708 | DR | tricarboxylic acid cycle                                                                                                                                                                                                                     |
| N | P11894 | CC | Binds to the 23S rRNA (By similarity).                                                                                                                                                                                                       |

|   |        |    |                                                                                                                                                                                                                                                        |
|---|--------|----|--------------------------------------------------------------------------------------------------------------------------------------------------------------------------------------------------------------------------------------------------------|
| N | P11894 | DE | 50S ribosomal protein L9, chloroplastic;                                                                                                                                                                                                               |
| N | P11894 | DR | structural constituent of ribosome                                                                                                                                                                                                                     |
| N | P12004 | CC | This protein is an auxiliary protein of DNA polymerase delta and is involved in the control of eukaryotic DNA replication by increasing the polymerase's processibility during elongation of the leading strand                                        |
| N | P12004 | CC | Has to be loaded onto DNA in order to be able to stimulate APEX2.                                                                                                                                                                                      |
| N | P12004 | CC | induces a robust stimulatory effect on the 3'-5' exonuclease and 3'-phosphodiesterase, but not apurinic- apyrimidinic (AP) endonuclease, APEX2                                                                                                         |
| N | P12004 | DE | Proliferating cell nuclear antigen;                                                                                                                                                                                                                    |
| N | P12004 | DR | DNA polymerase processivity factor activity                                                                                                                                                                                                            |
| N | P12004 | DR | DNA strand elongation involved in DNA replication                                                                                                                                                                                                      |
| N | P12004 | DR | MutLalpha complex binding                                                                                                                                                                                                                              |
| N | P12004 | DR | S phase of mitotic cell cycle                                                                                                                                                                                                                          |
| N | P12004 | DR | cell proliferation                                                                                                                                                                                                                                     |
| N | P12004 | DR | dinucleotide insertion or deletion binding                                                                                                                                                                                                             |
| N | P12004 | DR | mismatch repair                                                                                                                                                                                                                                        |
| N | P12004 | DR | nucleotide-excision repair, DNA gap filling                                                                                                                                                                                                            |
| N | P12004 | DR | phosphatidylinositol-mediated signaling                                                                                                                                                                                                                |
| N | P12004 | DR | positive regulation of deoxyribonuclease activity                                                                                                                                                                                                      |
| N | P12004 | DR | purine-specific mismatch base pair DNA N-glycosylase activity                                                                                                                                                                                          |
| N | P12004 | DR | regulation of DNA replication                                                                                                                                                                                                                          |
| N | P12004 | DR | regulation of transcription involved in G1/S phase of mitotic cell cycle                                                                                                                                                                               |
| N | P12004 | DR | telomere maintenance via recombination                                                                                                                                                                                                                 |
| N | P12004 | DR | telomere maintenance via semi-conservative replication                                                                                                                                                                                                 |
| N | P12004 | DR | transcription-coupled nucleotide-excision repair                                                                                                                                                                                                       |
| N | P12004 | DR | translesion synthesis                                                                                                                                                                                                                                  |
| N | P12045 | CC | Catalyzes the AIR-dependent conversion of 5- aminoimidazole ribonucleotide (AIR) and HCO(3)(-) to N5- carboxyaminoimidazole ribonucleotide (N5-CAIR) (By similarity)                                                                                   |
| N | P12045 | DE | 5-(carboxyamino)imidazole ribonucleotide synthetase;                                                                                                                                                                                                   |
| N | P12045 | DE | N5-CAIR synthase;                                                                                                                                                                                                                                      |
| N | P12045 | DE | N5-carboxyaminoimidazole ribonucleotide synthase;                                                                                                                                                                                                      |
| N | P12045 | DR | 'de novo' IMP biosynthetic process                                                                                                                                                                                                                     |
| N | P12045 | DR | 5-(carboxyamino)imidazole ribonucleotide synthase activity                                                                                                                                                                                             |
| N | P12045 | DR | pentose-phosphate shunt                                                                                                                                                                                                                                |
| N | P12045 | DR | phosphogluconate dehydrogenase (decarboxylating) activity                                                                                                                                                                                              |
| N | P12045 | DR | phosphoribosylaminoimidazole carboxylase activity                                                                                                                                                                                                      |
| N | P12557 | CC | Attaches the virus to sialic acid-containing cell receptors and thereby inducing infection                                                                                                                                                             |
| N | P12557 | CC | Binding of HN protein to the receptor induces a conformational change that allows the F protein to trigger virion/cell membranes fusion (By similarity).                                                                                               |
| N | P12557 | DE | Hemagglutinin-neuraminidase;                                                                                                                                                                                                                           |
| N | P12557 | DR | exo-alpha-sialidase activity                                                                                                                                                                                                                           |
| N | P12557 | DR | host cell surface receptor binding                                                                                                                                                                                                                     |
| N | P12557 | DR | interspecies interaction between organisms                                                                                                                                                                                                             |
| N | P12557 | DR | viral infectious cycle                                                                                                                                                                                                                                 |
| N | P12583 | CC | Binds to sialic acid-containing receptors on the cell surface, bringing about the attachment of the virus particle to the cell                                                                                                                         |
| N | P12583 | CC | Class I viral fusion protein                                                                                                                                                                                                                           |
| N | P12583 | CC | Low pH in endosomes induces an irreversible conformational change in HA2, releasing the fusion hydrophobic peptide                                                                                                                                     |
| N | P12583 | CC | Plays a major role in the determination of host range restriction and virulence responsible for penetration of the virus into the cell cytoplasm by mediating the fusion of the membrane of the endocytosed virus particle with the endosomal membrane |
| N | P12583 | CC | Several trimers are required to form a competent fusion pore.                                                                                                                                                                                          |
| N | P12583 | CC | This attachment induces virion internalization of about two third of the virus particles through clathrin-dependent endocytosis and about one third through a clathrin- and caveolin- independent pathway                                              |
| N | P12583 | DE | Hemagglutinin HA1 chain;                                                                                                                                                                                                                               |
| N | P12583 | DE | Hemagglutinin HA2 chain;                                                                                                                                                                                                                               |
| N | P12583 | DE | Hemagglutinin;                                                                                                                                                                                                                                         |
| N | P12583 | DR | host cell surface receptor binding                                                                                                                                                                                                                     |
| N | P12583 | DR | viral envelope fusion with host membrane                                                                                                                                                                                                               |
| N | P12601 | CC | Binds and inhibits the ubiquitin-like protein G1P2/ISG15, which is an early antiviral protein                                                                                                                                                          |
| N | P12601 | CC | Also binds poly(A) and U6 snRNA                                                                                                                                                                                                                        |

|   |        |    |                                                                                                                                                                                                                                                                                                                                                      |
|---|--------|----|------------------------------------------------------------------------------------------------------------------------------------------------------------------------------------------------------------------------------------------------------------------------------------------------------------------------------------------------------|
| N | P12601 | CC | Inhibits IFN-beta promoter activation; this inhibition is not dsRNA-binding dependent Prevents EIF2AK2/PKR activation, either by binding double strand RNA or by interacting directly with EIF2AK2/PKR                                                                                                                                               |
| N | P12601 | CC | Inhibits IRF-3 nuclear translocation and activation                                                                                                                                                                                                                                                                                                  |
| N | P12601 | CC | Suppresses the RNA silencing-based antiviral response in Drosophila cells (By similarity).                                                                                                                                                                                                                                                           |
| N | P12601 | DE | Non-structural protein 1;                                                                                                                                                                                                                                                                                                                            |
| N | P12601 | DR | evasion by virus of host immune response                                                                                                                                                                                                                                                                                                             |
| N | P12879 | CC | One of the primary rRNA binding proteins, it binds directly to 16S rRNA central domain where it helps coordinate assembly of the platform of the 30S subunit (By similarity)                                                                                                                                                                         |
| N | P12879 | DE | 30S ribosomal protein S8;                                                                                                                                                                                                                                                                                                                            |
| N | P12879 | DR | structural constituent of ribosome                                                                                                                                                                                                                                                                                                                   |
| N | P13105 | CC | Binds to actin filaments in muscle and non-muscle cells                                                                                                                                                                                                                                                                                              |
| N | P13105 | CC | In non-muscle cells is implicated in stabilizing cytoskeleton actin filaments.                                                                                                                                                                                                                                                                       |
| N | P13105 | CC | Plays a central role, in association with the troponin complex, in the calcium dependent regulation of vertebrate striated muscle contraction                                                                                                                                                                                                        |
| N | P13105 | CC | Smooth muscle contraction is regulated by interaction with caldesmon                                                                                                                                                                                                                                                                                 |
| N | P13105 | DE | Alpha-tropomyosin;                                                                                                                                                                                                                                                                                                                                   |
| N | P13105 | DE | Tropomyosin alpha-1 chain;                                                                                                                                                                                                                                                                                                                           |
| N | P13105 | DE | Tropomyosin-1;                                                                                                                                                                                                                                                                                                                                       |
| N | P13105 | DR | actin binding                                                                                                                                                                                                                                                                                                                                        |
| N | P13179 | CC | Displays RNA-directed RNA polymerase, mRNA guanylyl transferase, mRNA (guanine-N(7)-)-methyltransferase and poly(A) synthetase activities                                                                                                                                                                                                            |
| N | P13179 | CC | Functions either as transcriptase or as replicase                                                                                                                                                                                                                                                                                                    |
| N | P13179 | CC | In this mode, the polymerase replicates the whole viral genome without recognizing the transcriptional signals (By similarity).                                                                                                                                                                                                                      |
| N | P13179 | CC | The replicase mode is dependent on intracellular N protein concentration                                                                                                                                                                                                                                                                             |
| N | P13179 | CC | The template is composed of the viral RNA genome encapsulated by the nucleoprotein (N)                                                                                                                                                                                                                                                               |
| N | P13179 | CC | The transcriptase synthesizes subsequently five subgenomic RNAs, assuring their capping and polyadenylation by a stuttering mechanism                                                                                                                                                                                                                |
| N | P13179 | CC | The viral mRNA guanylyl transferase displays a different biochemical reaction than the cellular enzyme                                                                                                                                                                                                                                               |
| N | P13179 | DE | Large structural protein;                                                                                                                                                                                                                                                                                                                            |
| N | P13179 | DE | RNA-directed RNA polymerase L;                                                                                                                                                                                                                                                                                                                       |
| N | P13179 | DE | RNA-directed RNA polymerase;                                                                                                                                                                                                                                                                                                                         |
| N | P13179 | DE | Transcriptase;                                                                                                                                                                                                                                                                                                                                       |
| N | P13179 | DE | mRNA (guanine-N(7)-)-methyltransferase;                                                                                                                                                                                                                                                                                                              |
| N | P13179 | DE | mRNA guanylyltransferase;                                                                                                                                                                                                                                                                                                                            |
| N | P13179 | DR | RNA-directed RNA polymerase activity                                                                                                                                                                                                                                                                                                                 |
| N | P13179 | DR | mRNA (guanine-N7-)-methyltransferase activity                                                                                                                                                                                                                                                                                                        |
| N | P13393 | CC | General transcription factor that functions at the core of the DNA-binding general transcription factor complex TFIID                                                                                                                                                                                                                                |
| N | P13393 | CC | Binding of TFIID to a promoter (with or without TATA element) is the initial step in preinitiation complex (PIC) formation                                                                                                                                                                                                                           |
| N | P13393 | CC | TFIID plays a key role in the regulation of gene expression by RNA polymerase II through different activities such as transcription activator interaction, core promoter recognition and selectivity, TFIIA and TFIIB interaction, chromatin modification (histone acetylation by TAFI), facilitation of DNA opening and initiation of transcription |
| N | P13393 | DE | TATA sequence-binding protein;                                                                                                                                                                                                                                                                                                                       |
| N | P13393 | DE | TATA-binding factor;                                                                                                                                                                                                                                                                                                                                 |
| N | P13393 | DE | TATA-box factor;                                                                                                                                                                                                                                                                                                                                     |
| N | P13393 | DE | TATA-box-binding protein;                                                                                                                                                                                                                                                                                                                            |
| N | P13393 | DE | Transcription factor D;                                                                                                                                                                                                                                                                                                                              |
| N | P13393 | DE | Transcription initiation factor TFIID TBP subunit;                                                                                                                                                                                                                                                                                                   |
| N | P13393 | DR | DNA bending activity                                                                                                                                                                                                                                                                                                                                 |
| N | P13393 | DR | RNA polymerase I transcription factor activity                                                                                                                                                                                                                                                                                                       |
| N | P13393 | DR | RNA polymerase II transcriptional preinitiation complex assembly                                                                                                                                                                                                                                                                                     |
| N | P13393 | DR | RNA polymerase III transcription factor activity                                                                                                                                                                                                                                                                                                     |
| N | P13393 | DR | RNA polymerase III transcriptional preinitiation complex assembly                                                                                                                                                                                                                                                                                    |
| N | P13393 | DR | chromatin binding                                                                                                                                                                                                                                                                                                                                    |
| N | P13393 | DR | general RNA polymerase II transcription factor activity                                                                                                                                                                                                                                                                                              |
| N | P13393 | DR | general transcription from RNA polymerase II promoter                                                                                                                                                                                                                                                                                                |
| N | P13393 | DR | promoter binding                                                                                                                                                                                                                                                                                                                                     |
| N | P13393 | DR | protein binding                                                                                                                                                                                                                                                                                                                                      |
| N | P13393 | DR | regulation of transcription, DNA-dependent                                                                                                                                                                                                                                                                                                           |



|   |        |    |                                                                                                                                                                                                                                                                    |
|---|--------|----|--------------------------------------------------------------------------------------------------------------------------------------------------------------------------------------------------------------------------------------------------------------------|
| N | P13393 | DR | transcription from RNA polymerase I promoter                                                                                                                                                                                                                       |
| N | P13393 | DR | transposon integration                                                                                                                                                                                                                                             |
| N | P13567 | CC | The UvrABC repair system catalyzes the recognition and processing of DNA lesions.                                                                                                                                                                                  |
| N | P13567 | CC | A damage recognition complex composed of 2 UvrA and 2 UvrB subunits scans DNA for abnormalities                                                                                                                                                                    |
| N | P13567 | CC | UvrA is an ATPase and a DNA-binding protein                                                                                                                                                                                                                        |
| N | P13567 | CC | When the presence of a lesion has been verified by UvrB, the UvrA molecules dissociate (By similarity).                                                                                                                                                            |
| N | P13567 | DE | Excinuclease ABC subunit A;                                                                                                                                                                                                                                        |
| N | P13567 | DE | UvrA protein;                                                                                                                                                                                                                                                      |
| N | P13567 | DE | UvrABC system protein A;                                                                                                                                                                                                                                           |
| N | P13567 | DR | ATPase activity                                                                                                                                                                                                                                                    |
| N | P13567 | DR | excinuclease ABC activity                                                                                                                                                                                                                                          |
| N | P13567 | DR | metal ion binding                                                                                                                                                                                                                                                  |
| N | P13567 | DR | nucleotide-excision repair                                                                                                                                                                                                                                         |
| N | P13674 | CC | Catalyzes the post-translational formation of 4- hydroxyproline in -Xaa-Pro-Gly- sequences in collagens and other proteins.                                                                                                                                        |
| N | P13674 | DE | 4-PH alpha-1;                                                                                                                                                                                                                                                      |
| N | P13674 | DE | Procollagen-proline,2-oxoglutarate-4-dioxygenase subunit alpha-1;                                                                                                                                                                                                  |
| N | P13674 | DE | Prolyl 4-hydroxylase subunit alpha-1;                                                                                                                                                                                                                              |
| N | P13674 | DR | L-ascorbic acid binding                                                                                                                                                                                                                                            |
| N | P13674 | DR | iron ion binding                                                                                                                                                                                                                                                   |
| N | P13674 | DR | oxidation-reduction process                                                                                                                                                                                                                                        |
| N | P13674 | DR | oxidoreductase activity, acting on single donors with incorporation of molecular oxygen, incorporation of two atoms of oxygen                                                                                                                                      |
| N | P13674 | DR | procollagen-proline 4-dioxygenase activity                                                                                                                                                                                                                         |
| N | P13726 | CC | Initiates blood coagulation by forming a complex with circulating factor VIII or VIIIa.                                                                                                                                                                            |
| N | P13726 | CC | TF plays a role in normal hemostasis by initiating the cell-surface assembly and propagation of the coagulation protease cascade.                                                                                                                                  |
| N | P13726 | CC | The [TF:VIIa] complex activates factors IX or X by specific limited proteolysis                                                                                                                                                                                    |
| N | P13726 | DE | CD142;                                                                                                                                                                                                                                                             |
| N | P13726 | DE | Coagulation factor III;                                                                                                                                                                                                                                            |
| N | P13726 | DE | Thromboplastin;                                                                                                                                                                                                                                                    |
| N | P13726 | DE | Tissue factor;                                                                                                                                                                                                                                                     |
| N | P13726 | DR | activation of blood coagulation via clotting cascade                                                                                                                                                                                                               |
| N | P13726 | DR | activation of caspase activity                                                                                                                                                                                                                                     |
| N | P13726 | DR | activation of plasma proteins involved in acute inflammatory response                                                                                                                                                                                              |
| N | P13726 | DR | anti-apoptosis                                                                                                                                                                                                                                                     |
| N | P13726 | DR | blood coagulation, extrinsic pathway                                                                                                                                                                                                                               |
| N | P13726 | DR | cell surface binding                                                                                                                                                                                                                                               |
| N | P13726 | DR | phospholipid binding                                                                                                                                                                                                                                               |
| N | P13726 | DR | positive regulation of angiogenesis                                                                                                                                                                                                                                |
| N | P13726 | DR | positive regulation of endothelial cell proliferation                                                                                                                                                                                                              |
| N | P13726 | DR | positive regulation of platelet-derived growth factor receptor signaling pathway                                                                                                                                                                                   |
| N | P13726 | DR | positive regulation of positive chemotaxis                                                                                                                                                                                                                         |
| N | P13726 | DR | positive regulation of protein kinase B signaling cascade                                                                                                                                                                                                          |
| N | P13726 | DR | protease binding                                                                                                                                                                                                                                                   |
| N | P13770 | CC | Catalyzes the recombination between the large inverted repetitions of the alpha2(I) collagen gene.                                                                                                                                                                 |
| N | P13770 | DE | Recombinase Flp protein;                                                                                                                                                                                                                                           |
| N | P13770 | DR | DNA integration                                                                                                                                                                                                                                                    |
| N | P13770 | DR | DNA recombination                                                                                                                                                                                                                                                  |
| N | P14106 | CC | C1q associates with the proenzymes C1r and C1s to yield C1, the first component of the serum complement system                                                                                                                                                     |
| N | P14106 | CC | The collagen-like regions of C1q interact with the Ca(2+)-dependent C1r(2)C1s(2) proenzyme complex, and efficient activation of C1 takes place on interaction of the globular heads of C1q with the Fc regions of IgG or IgM antibody present in immune complexes. |
| N | P14106 | DE | Complement C1q subcomponent subunit B;                                                                                                                                                                                                                             |
| N | P14106 | DR | complement activation, classical pathway                                                                                                                                                                                                                           |
| N | P14106 | DR | innate immune response                                                                                                                                                                                                                                             |
| N | P14106 | DR | protein homodimerization activity                                                                                                                                                                                                                                  |
| N | P14121 | CC | This is one of 5 proteins that mediate the attachment of the 5S rRNA onto the large ribosomal subunit, stabilizing the orientation of adjacent RNA domains.                                                                                                        |
| N | P14121 | DE | 50S ribosomal protein L30P;                                                                                                                                                                                                                                        |
| N | P14121 | DR | structural constituent of ribosome                                                                                                                                                                                                                                 |

|   |        |    |                                                                                                                                                                                                                        |
|---|--------|----|------------------------------------------------------------------------------------------------------------------------------------------------------------------------------------------------------------------------|
| N | P14132 | DE | 40S ribosomal protein 1024;                                                                                                                                                                                            |
| N | P14132 | DE | 40S ribosomal protein S9;                                                                                                                                                                                              |
| N | P14132 | DE | Vegetative-specific protein V12;                                                                                                                                                                                       |
| N | P14132 | DR | structural constituent of ribosome                                                                                                                                                                                     |
| N | P14247 | CC | DNA-dependent RNA polymerase catalyzes the transcription of DNA into RNA using the four ribonucleoside triphosphates as substrates.                                                                                    |
| N | P14247 | DE | DNA-directed RNA polymerase subunit A";                                                                                                                                                                                |
| N | P14247 | DR | DNA-directed RNA polymerase activity                                                                                                                                                                                   |
| N | P14269 | CC | The role of the precursor might be to condense the viral prochromatin for encapsidation by virtue of the two basic domains                                                                                             |
| N | P14269 | CC | Subsequent cleavage within the particle after residue 31 would release the cross-link and would prepare the viral chromatin for the relaxed conformation required during subsequent infection and uncoating            |
| N | P14269 | CC | The cleavage seems to be necessary for infectivity.                                                                                                                                                                    |
| N | P14269 | DE | 11 kDa core protein;                                                                                                                                                                                                   |
| N | P14269 | DE | Late L2 mu core protein;                                                                                                                                                                                               |
| N | P14329 | CC | Ribosomal protein that binds calmodulin.                                                                                                                                                                               |
| N | P14329 | DE | 22 kDa calmodulin-binding protein;                                                                                                                                                                                     |
| N | P14329 | DE | 60S ribosomal protein L19;                                                                                                                                                                                             |
| N | P14329 | DE | Vegetative-specific protein V14;                                                                                                                                                                                       |
| N | P14329 | DR | calmodulin binding                                                                                                                                                                                                     |
| N | P14329 | DR | structural constituent of ribosome                                                                                                                                                                                     |
| N | P14400 | DE | Electromotor neuron-associated protein 1;                                                                                                                                                                              |
| N | P14465 | CC | Fibrinogen has a double function: yielding monomers that polymerize into fibrin and acting as a cofactor in platelet aggregation.                                                                                      |
| N | P14465 | DE | Fibrinogen beta chain;                                                                                                                                                                                                 |
| N | P14465 | DE | Fibrinopeptide B;                                                                                                                                                                                                      |
| N | P14465 | DR | blood coagulation                                                                                                                                                                                                      |
| N | P14548 | CC | Component of the ubiquinol-cytochrome c reductase complex (complex III or cytochrome b-c1 complex), which is a respiratory chain that generates an electrochemical potential coupled to ATP synthesis (By similarity). |
| N | P14548 | DE | Complex III subunit 3;                                                                                                                                                                                                 |
| N | P14548 | DE | Complex III subunit III;                                                                                                                                                                                               |
| N | P14548 | DE | Cytochrome b-c1 complex subunit 3;                                                                                                                                                                                     |
| N | P14548 | DE | Cytochrome b;                                                                                                                                                                                                          |
| N | P14548 | DE | Ubiquinol-cytochrome-c reductase complex cytochrome b subunit;                                                                                                                                                         |
| N | P14548 | DR | electron carrier activity                                                                                                                                                                                              |
| N | P14548 | DR | metal ion binding                                                                                                                                                                                                      |
| N | P14548 | DR | oxidoreductase activity                                                                                                                                                                                                |
| N | P14548 | DR | respiratory electron transport chain                                                                                                                                                                                   |
| N | P14553 | CC | Capsid proteins VP1, VP2, and VP3 form a closed capsid enclosing the viral positive strand RNA genome                                                                                                                  |
| N | P14553 | CC | Protein 2C associates with and induces structural rearrangements of intracellular membranes                                                                                                                            |
| N | P14553 | CC | Protein 3B is covalently linked to the 5'-end of both the positive-strand and negative-strand genomic RNAs                                                                                                             |
| N | P14553 | CC | RNA-directed RNA polymerase 3D-POL replicates genomic and antigenomic RNA by recognizing replications specific signals (By similarity).                                                                                |
| N | P14553 | CC | The 3AB precursor interacts with the 3CD precursor and with RNA structures found at both the 5'- and 3'-termini of the viral genome                                                                                    |
| N | P14553 | CC | VP1-2A precursor is a component of immature procapsids and corresponds to an extended form of the structural protein VP1                                                                                               |
| N | P14553 | CC | All these proteins contain a beta-sheet structure called beta-barrel jelly roll                                                                                                                                        |
| N | P14553 | CC | It acts as a genome-linked replication primer (By similarity).                                                                                                                                                         |
| N | P14553 | CC | It displays RNA-binding, nucleotide binding and RNAase activities (By similarity)                                                                                                                                      |
| N | P14553 | CC | It is proteolytically removed from the precursor by a host protease and does not seem to be found in mature particles (By similarity).                                                                                 |
| N | P14553 | CC | Since the 3AB precursor contains the hydrophobic domain 3A, it probably anchors the whole viral replicase complex to intracellular membranes on which viral RNA synthesis occurs (By similarity).                      |
| N | P14553 | CC | The C-terminal domain of VP1-2A, protein 2A, acts as an assembly signal that allows multimerization of VP1-2A and formation of pentamers of VP1-VP2-VP3 trimers                                                        |
| N | P14553 | CC | The capsid interacts with HAVCR1 to provide virion attachment to target cell (By similarity).                                                                                                                          |

|   |        |    |                                                                                                                                                |
|---|--------|----|------------------------------------------------------------------------------------------------------------------------------------------------|
| N | P14553 | CC | Together they form an icosahedral capsid (T=3) composed of 60 copies of each VP1, VP2, and VP3, with a diameter of approximately 300 Angstroms |
| N | P14553 | CC | VP1 is situated at the 12 fivefold axes, whereas VP2 and VP3 are located at the quasi-sixfold axes                                             |
| N | P14553 | DE | Genome polyprotein;                                                                                                                            |
| N | P14553 | DE | Picornain 3C;                                                                                                                                  |
| N | P14553 | DE | Protease 3C;                                                                                                                                   |
| N | P14553 | DE | Protein 2A;                                                                                                                                    |
| N | P14553 | DE | Protein 2B;                                                                                                                                    |
| N | P14553 | DE | Protein 2BC;                                                                                                                                   |
| N | P14553 | DE | Protein 2C;                                                                                                                                    |
| N | P14553 | DE | Protein 3A;                                                                                                                                    |
| N | P14553 | DE | Protein 3AB;                                                                                                                                   |
| N | P14553 | DE | Protein 3ABC;                                                                                                                                  |
| N | P14553 | DE | Protein 3ABCD;                                                                                                                                 |
| N | P14553 | DE | Protein 3B;                                                                                                                                    |
| N | P14553 | DE | Protein 3CD;                                                                                                                                   |
| N | P14553 | DE | Protein VP0;                                                                                                                                   |
| N | P14553 | DE | Protein VP1-2A;                                                                                                                                |
| N | P14553 | DE | Protein VP1;                                                                                                                                   |
| N | P14553 | DE | Protein VP2;                                                                                                                                   |
| N | P14553 | DE | Protein VP3;                                                                                                                                   |
| N | P14553 | DE | Protein VP4;                                                                                                                                   |
| N | P14553 | DE | RNA-directed RNA polymerase 3D-POL;                                                                                                            |
| N | P14553 | DE | Virion protein 1;                                                                                                                              |
| N | P14553 | DE | Virion protein 2;                                                                                                                              |
| N | P14553 | DE | Virion protein 3;                                                                                                                              |
| N | P14553 | DE | Virion protein 4;                                                                                                                              |
| N | P14553 | DR | RNA helicase activity                                                                                                                          |
| N | P14553 | DR | RNA-directed RNA polymerase activity                                                                                                           |
| N | P14553 | DR | RNA-protein covalent cross-linking                                                                                                             |
| N | P14553 | DR | cysteine-type endopeptidase activity                                                                                                           |
| N | P14553 | DR | evasion by virus of host immune response                                                                                                       |
| N | P14553 | DR | structural molecule activity                                                                                                                   |
| N | P14553 | DR | viral genome replication                                                                                                                       |
| N | P14592 | DE | 24 kDa antigen;                                                                                                                                |
| N | P14669 | CC | Inhibitor of phospholipase A2, also possesses anti- coagulant properties.                                                                      |
| N | P14669 | DE | 35-alpha calcimedlin;                                                                                                                          |
| N | P14669 | DE | Annexin III;                                                                                                                                   |
| N | P14669 | DE | Lipocortin III;                                                                                                                                |
| N | P14669 | DE | Placental anticoagulant protein III;                                                                                                           |
| N | P14669 | DR | calcium ion binding                                                                                                                            |
| N | P14669 | DR | calcium-dependent phospholipid binding                                                                                                         |
| N | P14669 | DR | hippocampus development                                                                                                                        |
| N | P14669 | DR | organ regeneration                                                                                                                             |
| N | P14669 | DR | phospholipase A2 inhibitor activity                                                                                                            |
| N | P14669 | DR | positive regulation of DNA metabolic process                                                                                                   |
| N | P14669 | DR | response to glucocorticoid stimulus                                                                                                            |
| N | P14669 | DR | response to growth factor stimulus                                                                                                             |
| N | P14870 | CC | Recognizes the double-stranded sequences GGATG and CATCC and cleaves respectively 14 bases after G-1 and 13 bases before C- 1.                 |
| N | P14870 | DE | Endonuclease FokI;                                                                                                                             |
| N | P14870 | DE | Type II restriction enzyme FokI;                                                                                                               |
| N | P14870 | DE | Type IIS restriction enzyme FokI;                                                                                                              |
| N | P14870 | DE | Type-2 restriction enzyme FokI;                                                                                                                |
| N | P14870 | DR | DNA restriction-modification system                                                                                                            |
| N | P14870 | DR | Type II site-specific deoxyribonuclease activity                                                                                               |
| N | P14921 | CC | Transcription factor.                                                                                                                          |
| N | P14921 | DE | Protein C-ets-1;                                                                                                                               |
| N | P14921 | DR | PML body organization                                                                                                                          |
| N | P14921 | DR | RNA polymerase II transcription factor activity                                                                                                |
| N | P14921 | DR | cell motility                                                                                                                                  |
| N | P14921 | DR | immune response                                                                                                                                |
| N | P14921 | DR | induction of apoptosis                                                                                                                         |
| N | P14921 | DR | negative regulation of cell cycle                                                                                                              |

|   |        |    |                                                                                                                                                     |
|---|--------|----|-----------------------------------------------------------------------------------------------------------------------------------------------------|
| N | P14921 | DR | negative regulation of cell proliferation                                                                                                           |
| N | P14921 | DR | positive regulation of cellular component movement                                                                                                  |
| N | P14921 | DR | positive regulation of erythrocyte differentiation                                                                                                  |
| N | P14921 | DR | positive regulation of gene-specific transcription from RNA polymerase II promoter                                                                  |
| N | P14921 | DR | protein binding                                                                                                                                     |
| N | P14921 | DR | response to antibiotic                                                                                                                              |
| N | P14921 | DR | sequence-specific DNA binding                                                                                                                       |
| N | P14921 | DR | sequence-specific DNA binding transcription factor activity                                                                                         |
| N | P14921 | DR | transcription factor binding                                                                                                                        |
| N | P14921 | DR | transcription from RNA polymerase II promoter                                                                                                       |
| N | P15063 | CC | Seems to act as an inhibitor of cellular proliferation (By similarity).                                                                             |
| N | P15063 | DE | Protein B-Myc;                                                                                                                                      |
| N | P15063 | DR | regulation of transcription, DNA-dependent                                                                                                          |
| N | P15063 | DR | sequence-specific DNA binding transcription factor activity                                                                                         |
| N | P15067 | CC | Hydrolyzes the alpha-1,6-glucosidic linkages in glycogen which has first been partially depolymerized by phosphorylase                              |
| N | P15067 | CC | Shows only very little activity with native glycogen.                                                                                               |
| N | P15067 | DE | Glycogen debranching enzyme;                                                                                                                        |
| N | P15067 | DE | Glycogen operon protein GlgX;                                                                                                                       |
| N | P15067 | DR | cation binding                                                                                                                                      |
| N | P15067 | DR | glycogen catabolic process                                                                                                                          |
| N | P15067 | DR | glycogen debranching enzyme activity                                                                                                                |
| N | P15067 | DR | hydrolase activity, hydrolyzing O-glycosyl compounds                                                                                                |
| N | P15067 | DR | response to DNA damage stimulus                                                                                                                     |
| N | P15098 | CC | The three proteins TGB1, TGB2 and TGB3 are required for virus movement.                                                                             |
| N | P15098 | DE | 7 kDa protein;                                                                                                                                      |
| N | P15098 | DE | ORF4 protein;                                                                                                                                       |
| N | P15098 | DE | TGB3 protein;                                                                                                                                       |
| N | P15098 | DE | Triple gene block 3 protein;                                                                                                                        |
| N | P15098 | DR | spread of virus in host, cell to cell                                                                                                               |
| N | P15183 | CC | Capsid protein self-assembles to form an icosahedral capsid with a T=3 symmetry, about 32-35 nm in diameter, and consisting of 180 capsid proteins. |
| N | P15183 | DE | Capsid protein;                                                                                                                                     |
| N | P15183 | DE | Coat protein;                                                                                                                                       |
| N | P15183 | DR | structural molecule activity                                                                                                                        |
| N | P15406 | CC | Required for genome encapsidation                                                                                                                   |
| N | P15406 | CC | Forms ribonucleoprotein complexes along with TGB1 helicase and viral RNA.                                                                           |
| N | P15406 | DE | Capsid protein;                                                                                                                                     |
| N | P15406 | DE | Coat protein;                                                                                                                                       |
| N | P15406 | DR | structural molecule activity                                                                                                                        |
| N | P15570 | CC | Induces local and distal defense responses (incompatible hypersensitive reaction) in plants from the solanaceae and cruciferae families             |
| N | P15570 | CC | Elicits leaf necrosis and causes the accumulation of pathogenesis-related proteins                                                                  |
| N | P15570 | CC | Might interact with the lipidic molecules of the plasma membrane.                                                                                   |
| N | P15570 | DE | Beta-elicitin cryptogein;                                                                                                                           |
| N | P15570 | DR | defense response                                                                                                                                    |
| N | P15570 | DR | modulation by symbiont of host defense-related programmed cell death                                                                                |
| N | P15732 | CC | Catalyzes the covalent attachment of ubiquitin to other proteins                                                                                    |
| N | P15732 | CC | Mediates the selective degradation of short-lived and abnormal proteins.                                                                            |
| N | P15732 | DE | Ubiquitin carrier protein;                                                                                                                          |
| N | P15732 | DE | Ubiquitin-conjugating enzyme E2-16 kDa;                                                                                                             |
| N | P15732 | DE | Ubiquitin-protein ligase;                                                                                                                           |
| N | P15732 | DR | post-translational protein modification                                                                                                             |
| N | P15732 | DR | protein polyubiquitination                                                                                                                          |
| N | P15732 | DR | response to stress                                                                                                                                  |
| N | P15732 | DR | ubiquitin-protein ligase activity                                                                                                                   |
| N | P15777 | CC | S1 attaches the virion to the cell membrane by binding to 9-O-acetylated sialic acid containing proteins, initiating the infection (By similarity). |
| N | P15777 | DE | Peplomer protein;                                                                                                                                   |
| N | P15777 | DE | S glycoprotein;                                                                                                                                     |
| N | P15777 | DE | Spike glycoprotein;                                                                                                                                 |
| N | P15777 | DE | Spike protein S1;                                                                                                                                   |
| N | P15777 | DE | Spike protein S2;                                                                                                                                   |
| N | P15777 | DR | cellular membrane fusion                                                                                                                            |
| N | P15777 | DR | virion attachment, binding of host cell surface receptor                                                                                            |

|   |        |    |                                                                                                                                                                                                                              |
|---|--------|----|------------------------------------------------------------------------------------------------------------------------------------------------------------------------------------------------------------------------------|
| N | P15788 | CC | Ferredoxins are iron-sulfur proteins that transfer electrons in a wide variety of metabolic reactions.                                                                                                                       |
| N | P15788 | DR | 2 iron, 2 sulfur cluster binding                                                                                                                                                                                             |
| N | P15788 | DR | electron carrier activity                                                                                                                                                                                                    |
| N | P15788 | DR | electron transport chain                                                                                                                                                                                                     |
| N | P15788 | DR | metal ion binding                                                                                                                                                                                                            |
| N | P15992 | CC | Not known                                                                                                                                                                                                                    |
| N | P15992 | CC | One of the major polypeptides produced on heat shock.                                                                                                                                                                        |
| N | P15992 | DE | 26 kDa heat shock protein;                                                                                                                                                                                                   |
| N | P15992 | DE | Heat shock protein 26;                                                                                                                                                                                                       |
| N | P15992 | DR | protein folding                                                                                                                                                                                                              |
| N | P15992 | DR | response to stress                                                                                                                                                                                                           |
| N | P15992 | DR | unfolded protein binding                                                                                                                                                                                                     |
| N | P16079 | CC | This protein found in the seeds of many leguminous and non-leguminous plants is the source of sulfur-containing amino acids in seed meals.                                                                                   |
| N | P16079 | DE | Legumin type B acidic chain;                                                                                                                                                                                                 |
| N | P16079 | DE | Legumin type B alpha chain;                                                                                                                                                                                                  |
| N | P16079 | DE | Legumin type B basic chain;                                                                                                                                                                                                  |
| N | P16079 | DE | Legumin type B beta chain;                                                                                                                                                                                                   |
| N | P16079 | DE | Legumin type B;                                                                                                                                                                                                              |
| N | P16079 | DR | nutrient reservoir activity                                                                                                                                                                                                  |
| N | P16295 | CC | Factor IX is a vitamin K-dependent plasma protein that participates in the intrinsic pathway of blood coagulation by converting factor X to its active form in the presence of Ca(2+) ions, phospholipids, and factor VIIIa. |
| N | P16295 | DE | Christmas factor;                                                                                                                                                                                                            |
| N | P16295 | DE | Coagulation factor IX;                                                                                                                                                                                                       |
| N | P16295 | DR | blood coagulation                                                                                                                                                                                                            |
| N | P16295 | DR | serine-type endopeptidase activity                                                                                                                                                                                           |
| N | P16517 | DE | Early protein GP16.7;                                                                                                                                                                                                        |
| N | P16813 | DE | Uncharacterized protein UL39;                                                                                                                                                                                                |
| N | P17021 | CC | May be involved in transcriptional regulation.                                                                                                                                                                               |
| N | P17021 | DE | Zinc finger protein 17;                                                                                                                                                                                                      |
| N | P17021 | DE | Zinc finger protein HPF3;                                                                                                                                                                                                    |
| N | P17021 | DE | Zinc finger protein KOX10;                                                                                                                                                                                                   |
| N | P17021 | DR | regulation of transcription, DNA-dependent                                                                                                                                                                                   |
| N | P17021 | DR | zinc ion binding                                                                                                                                                                                                             |
| N | P17065 | CC | Guanine nucleotide exchange factor for SEC4, catalyzing the dissociation of GDP from SEC4 and also potently promoting binding of GTP                                                                                         |
| N | P17065 | CC | Activation of SEC4 by SEC2 is needed for the directed transport of vesicles to sites of exocytosis                                                                                                                           |
| N | P17065 | CC | Binds the Rab GTPase YPT32, but does not have exchange activity on YPT32.                                                                                                                                                    |
| N | P17065 | DE | GDP-GTP exchange factor SEC2;                                                                                                                                                                                                |
| N | P17065 | DE | Rab guanine nucleotide exchange factor SEC2;                                                                                                                                                                                 |
| N | P17065 | DR | guanyl-nucleotide exchange factor activity                                                                                                                                                                                   |
| N | P17065 | DR | protein transport                                                                                                                                                                                                            |
| N | P17178 | CC | Catalyzes the first step in the oxidation of the side chain of sterol intermediates; the 27-hydroxylation of 5-beta-cholestane-3-alpha,7-alpha,12-alpha-triol                                                                |
| N | P17178 | CC | Has also a vitamin D3-25-hydroxylase activity.                                                                                                                                                                               |
| N | P17178 | DE | 5-beta-cholestane-3-alpha,7-alpha,12-alpha-triol 27-hydroxylase;                                                                                                                                                             |
| N | P17178 | DE | Cytochrome P-450C27/25;                                                                                                                                                                                                      |
| N | P17178 | DE | Cytochrome P450 27;                                                                                                                                                                                                          |
| N | P17178 | DE | Sterol 26-hydroxylase, mitochondrial;                                                                                                                                                                                        |
| N | P17178 | DE | Sterol 27-hydroxylase;                                                                                                                                                                                                       |
| N | P17178 | DE | Vitamin D(3) 25-hydroxylase;                                                                                                                                                                                                 |
| N | P17178 | DR | cholestanetriol 26-monooxygenase activity                                                                                                                                                                                    |
| N | P17178 | DR | cholesterol 26-hydroxylase activity                                                                                                                                                                                          |
| N | P17178 | DR | cholesterol metabolic process                                                                                                                                                                                                |
| N | P17178 | DR | electron carrier activity                                                                                                                                                                                                    |
| N | P17178 | DR | oxidation-reduction process                                                                                                                                                                                                  |
| N | P17178 | DR | steroid catabolic process                                                                                                                                                                                                    |
| N | P17178 | DR | vitamin D3 25-hydroxylase activity                                                                                                                                                                                           |
| N | P17400 | CC | The large envelope protein exists in two topological conformations, one which is termed 'external' or Le-HBsAg and the other 'internal' or Li-HBsAg                                                                          |
| N | P17400 | CC | In its external conformation the protein attaches the virus to cell receptors and thereby initiating infection                                                                                                               |

|   |        |    |                                                                                                                                                                     |
|---|--------|----|---------------------------------------------------------------------------------------------------------------------------------------------------------------------|
| N | P17400 | CC | In its internal conformation the protein plays a role in virion morphogenesis and mediates the contact with the nucleocapsid like a matrix protein (By similarity). |
| N | P17400 | CC | The large envelope protein probably also assumes fusion between virion and host membranes                                                                           |
| N | P17400 | CC | This interaction determines the species specificity and liver tropism                                                                                               |
| N | P17400 | DE | L glycoprotein;                                                                                                                                                     |
| N | P17400 | DE | Large S protein;                                                                                                                                                    |
| N | P17400 | DE | Large envelope protein;                                                                                                                                             |
| N | P17400 | DE | Large surface protein;                                                                                                                                              |
| N | P17400 | DE | Major surface antigen;                                                                                                                                              |
| N | P17400 | DR | viral reproduction                                                                                                                                                  |
| N | P17553 | CC | Ligand for members of the frizzled family of seven transmembrane receptors                                                                                          |
| N | P17553 | CC | Wnt-3 and Wnt-3a play distinct roles in cell-cell signaling during morphogenesis of the developing neural tube.                                                     |
| N | P17553 | DE | Proto-oncogene Int-4;                                                                                                                                               |
| N | P17553 | DE | Proto-oncogene Wnt-3;                                                                                                                                               |
| N | P17553 | DR | Spemann organizer formation at the anterior end of the primitive streak                                                                                             |
| N | P17553 | DR | Wnt receptor signaling pathway, calcium modulating pathway                                                                                                          |
| N | P17553 | DR | anterior/posterior axis specification                                                                                                                               |
| N | P17553 | DR | axon guidance                                                                                                                                                       |
| N | P17553 | DR | dorsal/ventral axis specification                                                                                                                                   |
| N | P17553 | DR | embryonic forelimb morphogenesis                                                                                                                                    |
| N | P17553 | DR | embryonic hindlimb morphogenesis                                                                                                                                    |
| N | P17553 | DR | head morphogenesis                                                                                                                                                  |
| N | P17553 | DR | mesoderm formation                                                                                                                                                  |
| N | P17553 | DR | negative regulation of axon extension involved in axon guidance                                                                                                     |
| N | P17553 | DR | organ morphogenesis                                                                                                                                                 |
| N | P17553 | DR | positive regulation of collateral sprouting in absence of injury                                                                                                    |
| N | P17553 | DR | positive regulation of gene expression                                                                                                                              |
| N | P17553 | DR | protein domain specific binding                                                                                                                                     |
| N | P17553 | DR | signal transducer activity                                                                                                                                          |
| N | P17603 | CC | Flagellin is the subunit protein which polymerizes to form the filaments of archaeal flagella.                                                                      |
| N | P17603 | DE | 24 kDa flagellin;                                                                                                                                                   |
| N | P17603 | DR | cellular component movement                                                                                                                                         |
| N | P17603 | DR | structural molecule activity                                                                                                                                        |
| N | P17672 | CC | Implicated in the regulation of ecdysone-triggered gene hierarchies                                                                                                 |
| N | P17672 | CC | Probably plays a key role in mediating the regulation of the larval molt by 20-OH-ecdysone.                                                                         |
| N | P17672 | DE | Ecdysone-induced protein 75B, isoform A;                                                                                                                            |
| N | P17672 | DE | Nuclear receptor subfamily 1 group D member 3, isoform A;                                                                                                           |
| N | P17672 | DR | antimicrobial humoral response                                                                                                                                      |
| N | P17672 | DR | ecdysis, chitin-based cuticle                                                                                                                                       |
| N | P17672 | DR | ecdysone-mediated induction of salivary gland cell autophagic cell death                                                                                            |
| N | P17672 | DR | regulation of ecdysteroid metabolic process                                                                                                                         |
| N | P17672 | DR | regulation of transcription, DNA-dependent                                                                                                                          |
| N | P17672 | DR | sequence-specific DNA binding                                                                                                                                       |
| N | P17672 | DR | sequence-specific DNA binding transcription factor activity                                                                                                         |
| N | P17672 | DR | steroid hormone receptor activity                                                                                                                                   |
| N | P17672 | DR | thyroid hormone receptor activity                                                                                                                                   |
| N | P17672 | DR | zinc ion binding                                                                                                                                                    |
| N | P17676 | CC | Important transcriptional activator in the regulation of genes involved in immune and inflammatory responses                                                        |
| N | P17676 | CC | Functions in brown adipose tissue (BAT) differentiation (By similarity).                                                                                            |
| N | P17676 | CC | It probably plays a role in the regulation of acute-phase reaction, inflammation and hemopoiesis                                                                    |
| N | P17676 | CC | NF-IL6 also binds to regulatory regions of several acute-phase and cytokines genes                                                                                  |
| N | P17676 | CC | Specifically binds to an IL-1 response element in the IL-6 gene                                                                                                     |
| N | P17676 | CC | The consensus recognition site is 5'-T[TG]NNGNAA[TG]-3'                                                                                                             |
| N | P17676 | DE | C/EBP beta;                                                                                                                                                         |
| N | P17676 | DE | CCAAT/enhancer-binding protein beta;                                                                                                                                |
| N | P17676 | DE | Liver activator protein;                                                                                                                                            |
| N | P17676 | DE | Nuclear factor NF-IL6;                                                                                                                                              |
| N | P17676 | DE | Transcription factor 5;                                                                                                                                             |
| N | P17676 | DR | acute-phase response                                                                                                                                                |

|   |        |    |                                                                                                                                                                                                                                                  |
|---|--------|----|--------------------------------------------------------------------------------------------------------------------------------------------------------------------------------------------------------------------------------------------------|
| N | P17676 | DR | immune response                                                                                                                                                                                                                                  |
| N | P17676 | DR | sequence-specific enhancer binding RNA polymerase II transcription factor activity                                                                                                                                                               |
| N | P17677 | CC | This protein is associated with nerve growth                                                                                                                                                                                                     |
| N | P17677 | CC | It is a major component of the motile "growth cones" that form the tips of elongating axons.                                                                                                                                                     |
| N | P17677 | DE | Axonal membrane protein GAP-43;                                                                                                                                                                                                                  |
| N | P17677 | DE | Growth-associated protein 43;                                                                                                                                                                                                                    |
| N | P17677 | DE | Neural phosphoprotein B-50;                                                                                                                                                                                                                      |
| N | P17677 | DE | Neuromodulin;                                                                                                                                                                                                                                    |
| N | P17677 | DR | activation of protein kinase C activity by G-protein coupled receptor protein signaling pathway                                                                                                                                                  |
| N | P17677 | DR | calmodulin binding                                                                                                                                                                                                                               |
| N | P17677 | DR | cell differentiation                                                                                                                                                                                                                             |
| N | P17677 | DR | nervous system development                                                                                                                                                                                                                       |
| N | P17677 | DR | regulation of growth                                                                                                                                                                                                                             |
| N | P17677 | DR | response to wounding                                                                                                                                                                                                                             |
| N | P17684 | CC | Conantokins inhibit N-methyl-D-aspartate (NMDA) receptors                                                                                                                                                                                        |
| N | P17684 | CC | Induces sleep-like symptoms in young mice and hyperactivity in older mice.                                                                                                                                                                       |
| N | P17684 | CC | This toxin inhibits both NR2A and NR2B subunits of N- methyl-D-aspartate (NMDA) receptor-mediated calcium influx in central nervous system neurons                                                                                               |
| N | P17684 | DE | Conantokin-T;                                                                                                                                                                                                                                    |
| N | P17684 | DR | acetylcholine receptor inhibitor activity                                                                                                                                                                                                        |
| N | P17684 | DR | ion channel inhibitor activity                                                                                                                                                                                                                   |
| N | P17684 | DR | synaptic transmission                                                                                                                                                                                                                            |
| N | P17989 | DE | 1,3-1,4-beta-D-glucan 4-glucanohydrolase;                                                                                                                                                                                                        |
| N | P17989 | DE | Beta-glucanase;                                                                                                                                                                                                                                  |
| N | P17989 | DE | Endo-beta-1,3-1,4 glucanase;                                                                                                                                                                                                                     |
| N | P17989 | DE | Mixed linkage beta-glucanase;                                                                                                                                                                                                                    |
| N | P17989 | DR | carbohydrate metabolic process                                                                                                                                                                                                                   |
| N | P17989 | DR | licheninase activity                                                                                                                                                                                                                             |
| N | P18424 | CC | Central enzyme in the extracellular metabolism of plasma lipoproteins                                                                                                                                                                            |
| N | P18424 | CC | Also produced in the brain by primary astrocytes, and esterifies free cholesterol on nascent APOE-containing lipoproteins secreted from glia and influences cerebral spinal fluid (CSF) APOE- and APOA1 levels                                   |
| N | P18424 | CC | Has a preference for plasma 16:0-18:2 or 18:0-18:2 phosphatidylcholines.                                                                                                                                                                         |
| N | P18424 | CC | Required for remodeling high-density lipoprotein particles into their spherical forms (By similarity)                                                                                                                                            |
| N | P18424 | CC | Synthesized mainly in the liver and secreted into plasma where it converts cholesterol and phosphatidylcholines (lecithins) to cholesteryl esters and lysophosphatidylcholines on the surface of high and low density lipoproteins (HDL and LDL) |
| N | P18424 | CC | The cholesterol ester is then transported back to the liver                                                                                                                                                                                      |
| N | P18424 | CC | Together with APOE and the cholesterol transporter ABCA1, plays a key role in the maturation of glial-derived, nascent lipoproteins                                                                                                              |
| N | P18424 | DE | Lecithin-cholesterol acyltransferase;                                                                                                                                                                                                            |
| N | P18424 | DE | Phosphatidylcholine-sterol acyltransferase;                                                                                                                                                                                                      |
| N | P18424 | DE | Phospholipid-cholesterol acyltransferase;                                                                                                                                                                                                        |
| N | P18424 | DR | cholesterol metabolic process                                                                                                                                                                                                                    |
| N | P18424 | DR | phosphatidylcholine-sterol O-acyltransferase activity                                                                                                                                                                                            |
| N | P18424 | DR | phospholipase A2 activity                                                                                                                                                                                                                        |
| N | P18424 | DR | response to copper ion                                                                                                                                                                                                                           |
| N | P18424 | DR | response to glucocorticoid stimulus                                                                                                                                                                                                              |
| N | P18434 | DE | Gastric H(+)/K(+) ATPase subunit beta;                                                                                                                                                                                                           |
| N | P18434 | DE | Potassium-transporting ATPase subunit beta;                                                                                                                                                                                                      |
| N | P18434 | DE | Proton pump beta chain;                                                                                                                                                                                                                          |
| N | P18434 | DR | ATP biosynthetic process                                                                                                                                                                                                                         |
| N | P18434 | DR | proton transport                                                                                                                                                                                                                                 |
| N | P18434 | DR | sodium:potassium-exchanging ATPase activity                                                                                                                                                                                                      |
| N | P18801 | CC | Bypasses host T-cell signaling by inducing a transcriptional program nearly identical to that of anti-CD3 cell activation                                                                                                                        |
| N | P18801 | CC | Extracellular Nef protein targets CD4(+) T-lymphocytes for apoptosis by interacting with CXCR4 surface receptors (By similarity).                                                                                                                |
| N | P18801 | CC | Factor of infectivity and pathogenicity, required for optimal virus replication Alters numerous pathways of T- lymphocytes function and downregulates                                                                                            |
| N | P18801 | CC | immunity surface molecules in order to evade host defense and increase viral infectivity                                                                                                                                                         |

|   |        |    |                                                                                                                                                                               |
|---|--------|----|-------------------------------------------------------------------------------------------------------------------------------------------------------------------------------|
| N | P18801 | CC | Alters the functionality of other immunity cells, like dendritic cells, monocytes/macrophages and NK cells                                                                    |
| N | P18801 | CC | Increasing surface FasL molecules and decreasing surface MHC-I molecules on infected CD4(+) cells send attacking cytotoxic CD8+ T-lymphocytes into apoptosis (By similarity). |
| N | P18801 | CC | Interaction with TCR-zeta chain up-regulates the Fas ligand (FasL)                                                                                                            |
| N | P18801 | CC | One of the earliest and most abundantly expressed viral proteins (By similarity).                                                                                             |
| N | P18801 | DE | C-terminal core protein;                                                                                                                                                      |
| N | P18801 | DE | Negative factor;                                                                                                                                                              |
| N | P18801 | DE | Protein Nef;                                                                                                                                                                  |
| N | P18801 | DR | SH3 domain binding                                                                                                                                                            |
| N | P18801 | DR | evasion by virus of host immune response                                                                                                                                      |
| N | P18801 | DR | regulation of defense response to virus by virus                                                                                                                              |
| N | P19067 | CC | This molybdenum-iron protein is part of the nitrogenase complex that catalyzes the key enzymatic reactions in nitrogen fixation.                                              |
| N | P19067 | DE | Dinitrogenase;                                                                                                                                                                |
| N | P19067 | DE | Nitrogenase component I;                                                                                                                                                      |
| N | P19067 | DE | Nitrogenase molybdenum-iron protein beta chain;                                                                                                                               |
| N | P19067 | DR | iron-sulfur cluster binding                                                                                                                                                   |
| N | P19067 | DR | metal ion binding                                                                                                                                                             |
| N | P19067 | DR | nitrogen fixation                                                                                                                                                             |
| N | P19067 | DR | nitrogenase activity                                                                                                                                                          |
| N | P19067 | DR | oxidation-reduction process                                                                                                                                                   |
| N | P19132 | CC | Stores iron in a soluble, non-toxic, readily available form                                                                                                                   |
| N | P19132 | CC | Also plays a role in delivery of iron to cells                                                                                                                                |
| N | P19132 | CC | Has ferroxidase activity                                                                                                                                                      |
| N | P19132 | CC | Important for iron homeostasis                                                                                                                                                |
| N | P19132 | CC | iron is taken up in the ferrous form and deposited as ferric hydroxides after oxidation                                                                                       |
| N | P19132 | CC | Mediates iron uptake in capsule cells of the developing kidney (By similarity).                                                                                               |
| N | P19132 | DE | Ferritin H subunit;                                                                                                                                                           |
| N | P19132 | DE | Ferritin heavy chain;                                                                                                                                                         |
| N | P19132 | DR | cellular iron ion homeostasis                                                                                                                                                 |
| N | P19132 | DR | ferric iron binding                                                                                                                                                           |
| N | P19132 | DR | ferroxidase activity                                                                                                                                                          |
| N | P19132 | DR | immune response                                                                                                                                                               |
| N | P19132 | DR | iron ion transport                                                                                                                                                            |
| N | P19132 | DR | negative regulation of cell proliferation                                                                                                                                     |
| N | P19132 | DR | negative regulation of necrotic cell death                                                                                                                                    |
| N | P19132 | DR | oxidation-reduction process                                                                                                                                                   |
| N | P19132 | DR | protein binding                                                                                                                                                               |
| N | P19141 | CC | Crystallins are the dominant structural components of the vertebrate eye lens.                                                                                                |
| N | P19141 | DE | Beta-B3 crystallin;                                                                                                                                                           |
| N | P19141 | DE | Beta-crystallin B3;                                                                                                                                                           |
| N | P19141 | DR | structural constituent of eye lens                                                                                                                                            |
| N | P19170 | CC | Protein S19 forms a complex with S13 that binds strongly to the 16S ribosomal RNA (By similarity).                                                                            |
| N | P19170 | DE | 30S ribosomal protein S19, chloroplastic;                                                                                                                                     |
| N | P19170 | DR | structural constituent of ribosome                                                                                                                                            |
| N | P19205 | CC | This enzyme catalyzes the hydrolysis of the N-terminal peptide bond of an N-acetylated peptide to generate an N- acetylated amino acid and a peptide with a free N-terminus   |
| N | P19205 | CC | It preferentially cleaves off Ac-Ala, Ac-Met and Ac-Ser.                                                                                                                      |
| N | P19205 | DE | Acyl-peptide hydrolase;                                                                                                                                                       |
| N | P19205 | DE | Acylamino-acid-releasing enzyme;                                                                                                                                              |
| N | P19205 | DE | Acylaminoacyl-peptidase;                                                                                                                                                      |
| N | P19205 | DR | serine-type endopeptidase activity                                                                                                                                            |
| N | P19435 | DE | Uncharacterized 23.9 kDa protein in glnII region;                                                                                                                             |
| N | P19506 | CC | Counteracts the innate antiviral activity of APOBEC3G                                                                                                                         |
| N | P19506 | CC | Binds viral RNA and affects the stability of viral nucleoprotein core                                                                                                         |
| N | P19506 | CC | Forms a complex with host APOBEC3G thus preventing the entry of this lethally hypermutating enzyme into progeny virions                                                       |
| N | P19506 | CC | Functions as an adapter molecule, recruiting APOBEC3G to the ubiquitin-proteasome machinery                                                                                   |
| N | P19506 | CC | May play a role in viral morphology (By similarity).                                                                                                                          |
| N | P19506 | CC | Targets APOBEC3G for degradation through the assembly with elongin BC complex, CUL5 and RBX1                                                                                  |



|   |        |    |                                                                                                                                                                                                                                                                                    |
|---|--------|----|------------------------------------------------------------------------------------------------------------------------------------------------------------------------------------------------------------------------------------------------------------------------------------|
| N | P19506 | DE | SOR protein;                                                                                                                                                                                                                                                                       |
| N | P19506 | DE | Virion infectivity factor;                                                                                                                                                                                                                                                         |
| N | P19506 | DR | interspecies interaction between organisms                                                                                                                                                                                                                                         |
| N | P19506 | DR | viral infectious cycle                                                                                                                                                                                                                                                             |
| N | P19507 | CC | Nuclear transcriptional activator of viral gene expression, that is essential for viral transcription from the LTR promoter and replication                                                                                                                                        |
| N | P19507 | CC | Acts as a sequence-specific molecular adapter, directing components of the cellular transcription machinery to the viral RNA to promote processive transcription elongation by the RNA polymerase II (RNA pol II) complex, thereby increasing the level of full-length transcripts |
| N | P19507 | CC | In the absence of Tat, the RNA Pol II generates short or non-processive transcripts that terminate at approximately 60 bp from the initiation site                                                                                                                                 |
| N | P19507 | CC | Tat associates with the CCNT1/cyclin-T1 component of the P-TEFb complex (CDK9 and CCNT1), which promotes RNA chain elongation                                                                                                                                                      |
| N | P19507 | CC | The CDK9 component of P-TEFb and other Tat-activated kinases hyperphosphorylate the C-terminus of RNA Pol II that becomes stabilized and much more processive (By similarity).                                                                                                     |
| N | P19507 | CC | This binding increases Tat's affinity for a hairpin structure at the 5'-end of all nascent viral mRNAs referred to as the transactivation responsive RNA element (TAR RNA) and allows Tat/P-TEFb complex to bind cooperatively to TAR RNA                                          |
| N | P19507 | DE | Protein Tat;                                                                                                                                                                                                                                                                       |
| N | P19507 | DE | Transactivating regulatory protein;                                                                                                                                                                                                                                                |
| N | P19507 | DR | interspecies interaction between organisms                                                                                                                                                                                                                                         |
| N | P19507 | DR | regulation of transcription, DNA-dependent                                                                                                                                                                                                                                         |
| N | P19507 | DR | sequence-specific DNA binding transcription factor activity                                                                                                                                                                                                                        |
| N | P19532 | CC | Transcription factor that specifically recognizes and binds E-box sequences (3'-CANNTG-5')                                                                                                                                                                                         |
| N | P19532 | CC | Efficient DNA-binding requires dimerization with itself or with another Mit/TFE family member such as TFEB or MITF                                                                                                                                                                 |
| N | P19532 | CC | In association with TFEB, activates the expression of CD40L in T-cells, thereby playing a role in T- cell-dependent antibody responses in activated CD4(+) T-cells and thymus-dependent humoral immunity                                                                           |
| N | P19532 | CC | It also binds very well to a USF/MLTF site.                                                                                                                                                                                                                                        |
| N | P19532 | CC | Specifically recognizes the MUE3 box, a subset of E-boxes, present in the immunoglobulin enhancer                                                                                                                                                                                  |
| N | P19532 | DE | Class E basic helix-loop-helix protein 33;                                                                                                                                                                                                                                         |
| N | P19532 | DE | Transcription factor E3;                                                                                                                                                                                                                                                           |
| N | P19532 | DR | humoral immune response                                                                                                                                                                                                                                                            |
| N | P19532 | DR | positive regulation of gene-specific transcription from RNA polymerase II promoter                                                                                                                                                                                                 |
| N | P19532 | DR | promoter binding                                                                                                                                                                                                                                                                   |
| N | P19532 | DR | sequence-specific DNA binding transcription factor activity                                                                                                                                                                                                                        |
| N | P19532 | DR | transcription regulator activity                                                                                                                                                                                                                                                   |
| N | P19555 | CC | Involved in the transport of the viral pre-integration (PIC) complex to the nucleus during the early stages of the infection                                                                                                                                                       |
| N | P19555 | CC | May also act directly at the nuclear pore complex, by binding nucleoporins phenylalanine-glycine (FG)-repeat regions (By similarity).                                                                                                                                              |
| N | P19555 | CC | May interact with karyopherin alpha/KPNA1 and KPNA2 to increase their affinity for proteins containing basic-type nuclear localization signal, including the viral matrix protein MA, thus facilitating the translocation of the viral genome into the nucleus                     |
| N | P19555 | CC | This function is crucial for viral infection of non- dividing macrophages                                                                                                                                                                                                          |
| N | P19555 | DE | Protein Vpr;                                                                                                                                                                                                                                                                       |
| N | P19555 | DE | R ORF protein;                                                                                                                                                                                                                                                                     |
| N | P19555 | DE | Viral protein R;                                                                                                                                                                                                                                                                   |
| N | P19555 | DR | RNA-dependent DNA replication                                                                                                                                                                                                                                                      |
| N | P19555 | DR | entry into host cell                                                                                                                                                                                                                                                               |
| N | P19555 | DR | ion channel activity                                                                                                                                                                                                                                                               |
| N | P19555 | DR | provirus integration                                                                                                                                                                                                                                                               |
| N | P19555 | DR | uncoating of virus                                                                                                                                                                                                                                                                 |
| N | P19697 | CC | Binds to sialic acid-containing receptors on the cell surface, bringing about the attachment of the virus particle to the cell                                                                                                                                                     |
| N | P19697 | CC | Class I viral fusion protein                                                                                                                                                                                                                                                       |
| N | P19697 | CC | Low pH in endosomes induces an irreversible conformational change in HA2, releasing the fusion hydrophobic peptide                                                                                                                                                                 |
| N | P19697 | CC | Plays a major role in the determination of host range restriction and virulence                                                                                                                                                                                                    |

|   |        |    |                                                                                                                                                                                                                                                                                                                |
|---|--------|----|----------------------------------------------------------------------------------------------------------------------------------------------------------------------------------------------------------------------------------------------------------------------------------------------------------------|
| N | P19697 | CC | responsible for penetration of the virus into the cell cytoplasm by mediating the fusion of the membrane of the endocytosed virus particle with the endosomal membrane                                                                                                                                         |
| N | P19697 | CC | Several trimers are required to form a competent fusion pore.                                                                                                                                                                                                                                                  |
| N | P19697 | CC | This attachment induces virion internalization of about two third of the virus particles through clathrin-dependent endocytosis and about one third through a clathrin- and caveolin- independent pathway                                                                                                      |
| N | P19697 | DE | Hemagglutinin HA1 chain;                                                                                                                                                                                                                                                                                       |
| N | P19697 | DE | Hemagglutinin HA2 chain;                                                                                                                                                                                                                                                                                       |
| N | P19697 | DE | Hemagglutinin;                                                                                                                                                                                                                                                                                                 |
| N | P19697 | DR | host cell surface receptor binding                                                                                                                                                                                                                                                                             |
| N | P19697 | DR | viral envelope fusion with host membrane                                                                                                                                                                                                                                                                       |
| N | P20052 | CC | Cyclin partner of the cyclin-dependent kinase (CDK) PHO85                                                                                                                                                                                                                                                      |
| N | P20052 | CC | Negatively regulates the expression of phosphate- starvation-responsive genes under phosphate-rich conditions                                                                                                                                                                                                  |
| N | P20052 | CC | PHO80-PHO85 also phosphorylates and inactivates the calcineurin-responsive transcription factor CRZ1, linking PHO85 to calcium signaling.                                                                                                                                                                      |
| N | P20052 | CC | PHO80-PHO85 phosphorylates and inactivates protein kinase RIM15 by retaining it in the cytoplasm, antagonizing RIM15-induced entry into stationary phase                                                                                                                                                       |
| N | P20052 | CC | The PHO80-PHO85 cyclin-CDK holoenzyme phosphorylates and inactivates the transcription factor PHO4, by preventing its association with the transcription factor PHO2 and the nuclear import receptor PSE1, and by promoting association with the nuclear export receptor MSN5, excluding PHO4 from the nucleus |
| N | P20052 | DE | Aminoglycoside antibiotic sensitivity protein 3;                                                                                                                                                                                                                                                               |
| N | P20052 | DE | PHO85 cyclin PHO80;                                                                                                                                                                                                                                                                                            |
| N | P20052 | DE | Phosphate system cyclin PHO80;                                                                                                                                                                                                                                                                                 |
| N | P20052 | DR | cellular metal ion homeostasis                                                                                                                                                                                                                                                                                 |
| N | P20052 | DR | cyclin-dependent protein kinase regulator activity                                                                                                                                                                                                                                                             |
| N | P20052 | DR | negative regulation of calcium-mediated signaling                                                                                                                                                                                                                                                              |
| N | P20052 | DR | negative regulation of macroautophagy                                                                                                                                                                                                                                                                          |
| N | P20052 | DR | negative regulation of phosphate metabolic process                                                                                                                                                                                                                                                             |
| N | P20052 | DR | negative regulation of transcription from RNA polymerase II promoter                                                                                                                                                                                                                                           |
| N | P20052 | DR | regulation of cyclin-dependent protein kinase activity                                                                                                                                                                                                                                                         |
| N | P20052 | DR | regulation of protein localization                                                                                                                                                                                                                                                                             |
| N | P20059 | CC | Binds heme and transports it to the liver for breakdown and iron recovery, after which the free hemopexin returns to the circulation.                                                                                                                                                                          |
| N | P20059 | DR | metal ion binding                                                                                                                                                                                                                                                                                              |
| N | P20195 | CC | Essential for virus function.                                                                                                                                                                                                                                                                                  |
| N | P20195 | DE | Uncharacterized protein A-132;                                                                                                                                                                                                                                                                                 |
| N | P20432 | CC | Conjugation of reduced glutathione to a wide number of exogenous and endogenous hydrophobic electrophiles                                                                                                                                                                                                      |
| N | P20432 | CC | Has DDT dehydrochlorinase activity.                                                                                                                                                                                                                                                                            |
| N | P20432 | DE | DDT-dehydrochlorinase;                                                                                                                                                                                                                                                                                         |
| N | P20432 | DE | GST class-theta;                                                                                                                                                                                                                                                                                               |
| N | P20432 | DE | Glutathione S-transferase 1-1;                                                                                                                                                                                                                                                                                 |
| N | P20432 | DR | DDT-dehydrochlorinase activity                                                                                                                                                                                                                                                                                 |
| N | P20432 | DR | glutathione transferase activity                                                                                                                                                                                                                                                                               |
| N | P20432 | DR | protein binding                                                                                                                                                                                                                                                                                                |
| N | P20566 | DE | Uncharacterized 8.4 kDa protein;                                                                                                                                                                                                                                                                               |
| N | P20692 | DE | Prephenate dehydrogenase;                                                                                                                                                                                                                                                                                      |
| N | P20692 | DR | amino acid binding                                                                                                                                                                                                                                                                                             |
| N | P20692 | DR | oxidation-reduction process                                                                                                                                                                                                                                                                                    |
| N | P20692 | DR | prephenate dehydrogenase (NADP+) activity                                                                                                                                                                                                                                                                      |
| N | P20692 | DR | prephenate dehydrogenase activity                                                                                                                                                                                                                                                                              |
| N | P20692 | DR | tyrosine biosynthetic process                                                                                                                                                                                                                                                                                  |
| N | P20734 | CC | This enzyme is a serine protease capable of degrading the native triple helix of collagen                                                                                                                                                                                                                      |
| N | P20734 | DE | Collagenolytic protease 36 kDa C;                                                                                                                                                                                                                                                                              |
| N | P20734 | DR | collagen catabolic process                                                                                                                                                                                                                                                                                     |
| N | P20734 | DR | serine-type peptidase activity                                                                                                                                                                                                                                                                                 |
| N | P21342 | CC | The alpha subunit may be involved in the regulation of PFP by Fru-2,6-P.                                                                                                                                                                                                                                       |
| N | P21342 | DE | 6-phosphofructokinase, pyrophosphate dependent;                                                                                                                                                                                                                                                                |
| N | P21342 | DE | Pyrophosphate--fructose 6-phosphate 1-phosphotransferase subunit alpha;                                                                                                                                                                                                                                        |
| N | P21342 | DE | Pyrophosphate-dependent 6-phosphofructose-1-kinase;                                                                                                                                                                                                                                                            |
| N | P21342 | DR | 6-phosphofructokinase activity                                                                                                                                                                                                                                                                                 |
| N | P21342 | DR | diphosphate-fructose-6-phosphate 1-phosphotransferase activity                                                                                                                                                                                                                                                 |
| N | P21407 | DR | aspartic-type endopeptidase activity                                                                                                                                                                                                                                                                           |

|   |        |    |                                                                                                                                                                                                                                                        |
|---|--------|----|--------------------------------------------------------------------------------------------------------------------------------------------------------------------------------------------------------------------------------------------------------|
| N | P21407 | DR | dUTP metabolic process                                                                                                                                                                                                                                 |
| N | P21407 | DR | nucleic acid binding                                                                                                                                                                                                                                   |
| N | P21444 | CC | The surface protein (SU) attaches the virus to the host cell by binding to its receptor                                                                                                                                                                |
| N | P21444 | CC | Fusion occurs at the host cell plasma membrane (By similarity).                                                                                                                                                                                        |
| N | P21444 | CC | This interaction triggers the refolding of the transmembrane protein (TM) and is thought to activate its fusogenic potential by unmasking its fusion peptide                                                                                           |
| N | P21444 | DE | DE Flags: Precursor; Fragment;                                                                                                                                                                                                                         |
| N | P21444 | DE | Env polyprotein;                                                                                                                                                                                                                                       |
| N | P21444 | DE | Envelope glycoprotein;                                                                                                                                                                                                                                 |
| N | P21444 | DE | Glycoprotein 70;                                                                                                                                                                                                                                       |
| N | P21444 | DE | Surface protein;                                                                                                                                                                                                                                       |
| N | P21444 | DR | interspecies interaction between organisms                                                                                                                                                                                                             |
| N | P21444 | DR | structural molecule activity                                                                                                                                                                                                                           |
| N | P21444 | DR | viral infectious cycle                                                                                                                                                                                                                                 |
| N | P21768 | CC | Involved in oxygen transport from the lung to the various peripheral tissues.                                                                                                                                                                          |
| N | P21768 | DE | Alpha-1/2-globin;                                                                                                                                                                                                                                      |
| N | P21768 | DE | Hemoglobin alpha-1/2 chain;                                                                                                                                                                                                                            |
| N | P21768 | DE | Hemoglobin subunit alpha-1/2;                                                                                                                                                                                                                          |
| N | P21768 | DR | oxygen binding                                                                                                                                                                                                                                         |
| N | P21768 | DR | oxygen transporter activity                                                                                                                                                                                                                            |
| N | P21788 | CC | May play an important role in mitosis of sea urchin egg                                                                                                                                                                                                |
| N | P21788 | CC | may function as a Ca(2+)-dependent intracellular modulator of microtubule assembly                                                                                                                                                                     |
| N | P21788 | DE | 15 kDa calcium-binding protein;                                                                                                                                                                                                                        |
| N | P21788 | DR | calcium ion binding                                                                                                                                                                                                                                    |
| N | P22062 | CC | Catalyzes the methyl esterification of L-isoaspartyl and D-aspartyl residues in peptides and proteins that result from spontaneous decomposition of normal L-aspartyl and L-asparaginyl residues                                                       |
| N | P22062 | CC | Acts on microtubule-associated protein 2, cationic, clathrin light chains a and b, Ubiquitin carboxyl-terminal hydrolase isozyme L1, phosphatidylethanolamine-binding protein 1, stathmin, beta-synuclein and alpha-synuclein (By similarity)          |
| N | P22062 | CC | It plays a role in the repair and/or degradation of damaged proteins                                                                                                                                                                                   |
| N | P22062 | DE | L-isoaspartyl protein carboxyl methyltransferase;                                                                                                                                                                                                      |
| N | P22062 | DE | Protein L-isoaspartyl/D-aspartyl methyltransferase;                                                                                                                                                                                                    |
| N | P22062 | DE | Protein-L-isoaspartate(D-aspartate) O-methyltransferase;                                                                                                                                                                                               |
| N | P22062 | DE | Protein-beta-aspartate methyltransferase;                                                                                                                                                                                                              |
| N | P22062 | DR | S-adenosylhomocysteine metabolic process                                                                                                                                                                                                               |
| N | P22062 | DR | S-adenosylmethionine metabolic process                                                                                                                                                                                                                 |
| N | P22062 | DR | protein-L-isoaspartate (D-aspartate) O-methyltransferase activity                                                                                                                                                                                      |
| N | P22092 | CC | Binds to sialic acid-containing receptors on the cell surface, bringing about the attachment of the virus particle to the cell                                                                                                                         |
| N | P22092 | CC | Class I viral fusion protein                                                                                                                                                                                                                           |
| N | P22092 | CC | Low pH in endosomes induce an irreversible conformational change in HA2, releasing the fusion hydrophobic peptide                                                                                                                                      |
| N | P22092 | CC | Plays a major role in the determination of host range restriction and virulence responsible for penetration of the virus into the cell cytoplasm by mediating the fusion of the membrane of the endocytosed virus particle with the endosomal membrane |
| N | P22092 | CC | Several trimers are required to form a competent fusion pore.                                                                                                                                                                                          |
| N | P22092 | DE | Hemagglutinin HA1 chain;                                                                                                                                                                                                                               |
| N | P22092 | DE | Hemagglutinin HA2 chain;                                                                                                                                                                                                                               |
| N | P22092 | DE | Hemagglutinin;                                                                                                                                                                                                                                         |
| N | P22092 | DR | host cell surface receptor binding                                                                                                                                                                                                                     |
| N | P22092 | DR | viral envelope fusion with host membrane                                                                                                                                                                                                               |
| N | P22106 | DE | Asparagine synthetase B [glutamine-hydrolyzing];                                                                                                                                                                                                       |
| N | P22106 | DR | amino acid binding                                                                                                                                                                                                                                     |
| N | P22106 | DR | asparaginase activity                                                                                                                                                                                                                                  |
| N | P22106 | DR | asparagine biosynthetic process                                                                                                                                                                                                                        |
| N | P22106 | DR | asparagine synthase (glutamine-hydrolyzing) activity                                                                                                                                                                                                   |
| N | P22106 | DR | cellular amino acid catabolic process                                                                                                                                                                                                                  |
| N | P22106 | DR | glutamine metabolic process                                                                                                                                                                                                                            |
| N | P22220 | DE | Arginine decarboxylase;                                                                                                                                                                                                                                |
| N | P22220 | DR | arginine catabolic process                                                                                                                                                                                                                             |
| N | P22220 | DR | arginine decarboxylase activity                                                                                                                                                                                                                        |
| N | P22220 | DR | putrescine biosynthetic process                                                                                                                                                                                                                        |
| N | P22220 | DR | spermidine biosynthetic process                                                                                                                                                                                                                        |

|   |        |    |                                                                                                                                                                                                                                                                                    |
|---|--------|----|------------------------------------------------------------------------------------------------------------------------------------------------------------------------------------------------------------------------------------------------------------------------------------|
| N | P22760 | CC | Arylacetamide deacetylation is an important enzyme activity in the metabolic activation of arylamine substrates to ultimate carcinogens                                                                                                                                            |
| N | P22760 | CC | Displays cellular triglyceride lipase activity in liver                                                                                                                                                                                                                            |
| N | P22760 | CC | Displays major serine hydrolase activity in liver microsomes                                                                                                                                                                                                                       |
| N | P22760 | CC | Hydrolyzes also flutamide, which is an antiandrogen drug used for the treatment of prostate cancer that occasionally causes severe hepatotoxicity                                                                                                                                  |
| N | P22760 | CC | Increases intracellular fatty acids derived from hydrolysis of newly formed triglyceride stores.                                                                                                                                                                                   |
| N | P22760 | DE | Arylacetamide deacetylase;                                                                                                                                                                                                                                                         |
| N | P22760 | DR | deacetylase activity                                                                                                                                                                                                                                                               |
| N | P22760 | DR | positive regulation of triglyceride catabolic process                                                                                                                                                                                                                              |
| N | P22760 | DR | serine hydrolase activity                                                                                                                                                                                                                                                          |
| N | P22760 | DR | triglyceride lipase activity                                                                                                                                                                                                                                                       |
| N | P22792 | CC | The 83 kDa subunit binds and stabilizes the catalytic subunit at 37 degrees Celsius and keeps it in circulation                                                                                                                                                                    |
| N | P22792 | CC | Under some circumstances it may be an allosteric modulator of the catalytic subunit                                                                                                                                                                                                |
| N | P22792 | DE | Carboxypeptidase N 83 kDa chain;                                                                                                                                                                                                                                                   |
| N | P22792 | DE | Carboxypeptidase N large subunit;                                                                                                                                                                                                                                                  |
| N | P22792 | DE | Carboxypeptidase N polypeptide 2;                                                                                                                                                                                                                                                  |
| N | P22792 | DE | Carboxypeptidase N regulatory subunit;                                                                                                                                                                                                                                             |
| N | P22792 | DE | Carboxypeptidase N subunit 2;                                                                                                                                                                                                                                                      |
| N | P22792 | DR | enzyme regulator activity                                                                                                                                                                                                                                                          |
| N | P22792 | DR | protein stabilization                                                                                                                                                                                                                                                              |
| N | P22917 | DE | Uncharacterized 17.8 kDa protein in arn-motA intergenic region;                                                                                                                                                                                                                    |
| N | P23268 | CC | Odorant receptor (Potential).                                                                                                                                                                                                                                                      |
| N | P23268 | DE | Olfactory receptor 1082;                                                                                                                                                                                                                                                           |
| N | P23268 | DE | Olfactory receptor-like protein F12;                                                                                                                                                                                                                                               |
| N | P23275 | CC | Odorant receptor (Potential)                                                                                                                                                                                                                                                       |
| N | P23275 | CC | May be involved in the molecular processes underlying fasciculation and targeting of olfactory axons.                                                                                                                                                                              |
| N | P23275 | DE | Odorant receptor OR3;                                                                                                                                                                                                                                                              |
| N | P23275 | DE | Olfactory receptor 15;                                                                                                                                                                                                                                                             |
| N | P23275 | DE | Olfactory receptor 256-17;                                                                                                                                                                                                                                                         |
| N | P23275 | DR | olfactory receptor activity                                                                                                                                                                                                                                                        |
| N | P23275 | DR | sensory perception of smell                                                                                                                                                                                                                                                        |
| N | P23529 | CC | Mediates the binding, internalization, and catabolism of lipoprotein particles                                                                                                                                                                                                     |
| N | P23529 | CC | It can serve as a ligand for the LDL (apo B/E) receptor and for the specific apo-E receptor (chylomicron remnant) of hepatic tissues.                                                                                                                                              |
| N | P23529 | DE | Apolipoprotein E;                                                                                                                                                                                                                                                                  |
| N | P23529 | DR | heparin binding                                                                                                                                                                                                                                                                    |
| N | P23579 | CC | DNA-dependent RNA polymerase catalyzes the transcription of DNA into RNA using the four ribonucleoside triphosphates as substrates.                                                                                                                                                |
| N | P23579 | DE | DNA-directed RNA polymerase subunit beta;                                                                                                                                                                                                                                          |
| N | P23579 | DE | Plastid-encoded RNA polymerase subunit beta;                                                                                                                                                                                                                                       |
| N | P23579 | DE | RNA polymerase subunit beta;                                                                                                                                                                                                                                                       |
| N | P23579 | DR | DNA-directed RNA polymerase activity                                                                                                                                                                                                                                               |
| N | P23579 | DR | ribonucleoside binding                                                                                                                                                                                                                                                             |
| N | P23941 | CC | This methylase recognizes the double-stranded sequence GGATCC, causes specific methylation on C-5 on both strands, and protects the DNA from cleavage by the BamHI endonuclease.                                                                                                   |
| N | P23941 | DE | Modification methylase BamHI;                                                                                                                                                                                                                                                      |
| N | P23941 | DE | N(4)- cytosine-specific methyltransferase BamHI;                                                                                                                                                                                                                                   |
| N | P23941 | DR | DNA restriction-modification system                                                                                                                                                                                                                                                |
| N | P23941 | DR | N-methyltransferase activity                                                                                                                                                                                                                                                       |
| N | P23941 | DR | site-specific DNA-methyltransferase (cytosine-N4-specific) activity                                                                                                                                                                                                                |
| N | P24109 | CC | Nuclear transcriptional activator of viral gene expression, that is essential for viral transcription from the LTR promoter and replication                                                                                                                                        |
| N | P24109 | CC | Acts as a sequence-specific molecular adapter, directing components of the cellular transcription machinery to the viral RNA to promote processive transcription elongation by the RNA polymerase II (RNA pol II) complex, thereby increasing the level of full-length transcripts |
| N | P24109 | CC | In the absence of Tat, the RNA Pol II generates short or non-processive transcripts that terminate at approximately 60 bp from the initiation site                                                                                                                                 |
| N | P24109 | CC | Tat associates with the CCNT1/cyclin-T1 component of the P-TEFb complex (CDK9 and CCNT1), which promotes RNA chain elongation                                                                                                                                                      |

|   |        |    |                                                                                                                                                                                                                                                                                                                                                                                                                        |
|---|--------|----|------------------------------------------------------------------------------------------------------------------------------------------------------------------------------------------------------------------------------------------------------------------------------------------------------------------------------------------------------------------------------------------------------------------------|
| N | P24109 | CC | The CDK9 component of P-TEFb and other Tat-activated kinases hyperphosphorylate the C-terminus of RNA Pol II that becomes stabilized and much more processive (By similarity). This binding increases its affinity for a hairpin structure at the 3'-end of all nascent viral mRNAs referred to as the transactivation responsive RNA element (TAR RNA) and allows Tat/P-TEFb complex to bind cooperatively to TAR RNA |
| N | P24109 | CC | Protein Tat;                                                                                                                                                                                                                                                                                                                                                                                                           |
| N | P24109 | DE | Transactivating regulatory protein;                                                                                                                                                                                                                                                                                                                                                                                    |
| N | P24109 | DE | Transactivating regulatory protein;                                                                                                                                                                                                                                                                                                                                                                                    |
| N | P24109 | DR | interspecies interaction between organisms                                                                                                                                                                                                                                                                                                                                                                             |
| N | P24109 | DR | regulation of transcription, DNA-dependent                                                                                                                                                                                                                                                                                                                                                                             |
| N | P24109 | DR | sequence-specific DNA binding transcription factor activity                                                                                                                                                                                                                                                                                                                                                            |
| N | P24137 | CC | Component of the oligopeptide permease, a binding protein-dependent transport system                                                                                                                                                                                                                                                                                                                                   |
| N | P24137 | CC | Necessary for genetic competence but not sporulation                                                                                                                                                                                                                                                                                                                                                                   |
| N | P24137 | CC | Probably responsible for energy coupling to the transport system.                                                                                                                                                                                                                                                                                                                                                      |
| N | P24137 | DE | Oligopeptide transport ATP-binding protein OppF;                                                                                                                                                                                                                                                                                                                                                                       |
| N | P24137 | DE | Stage 0 sporulation protein KE;                                                                                                                                                                                                                                                                                                                                                                                        |
| N | P24137 | DR | ATPase activity                                                                                                                                                                                                                                                                                                                                                                                                        |
| N | P24137 | DR | establishment of competence for transformation                                                                                                                                                                                                                                                                                                                                                                         |
| N | P24137 | DR | peptide transport                                                                                                                                                                                                                                                                                                                                                                                                      |
| N | P24137 | DR | protein transport                                                                                                                                                                                                                                                                                                                                                                                                      |
| N | P24137 | DR | sporulation resulting in formation of a cellular spore                                                                                                                                                                                                                                                                                                                                                                 |
| N | P24186 | CC | Catalyzes the oxidation of 5,10- methylenetetrahydrofolate to 5,10-methenyltetrahydrofolate and then the hydrolysis of 5,10-methenyltetrahydrofolate to 10- formyltetrahydrofolate                                                                                                                                                                                                                                     |
| N | P24186 | CC | This enzyme is specific for NADP.                                                                                                                                                                                                                                                                                                                                                                                      |
| N | P24186 | DE | Bifunctional protein FOLD;                                                                                                                                                                                                                                                                                                                                                                                             |
| N | P24186 | DE | Methenyltetrahydrofolate cyclohydrolase;                                                                                                                                                                                                                                                                                                                                                                               |
| N | P24186 | DE | Methylenetetrahydrofolate dehydrogenase;                                                                                                                                                                                                                                                                                                                                                                               |
| N | P24186 | DR | folic acid-containing compound biosynthetic process                                                                                                                                                                                                                                                                                                                                                                    |
| N | P24186 | DR | histidine biosynthetic process                                                                                                                                                                                                                                                                                                                                                                                         |
| N | P24186 | DR | methenyltetrahydrofolate cyclohydrolase activity                                                                                                                                                                                                                                                                                                                                                                       |
| N | P24186 | DR | methionine biosynthetic process                                                                                                                                                                                                                                                                                                                                                                                        |
| N | P24186 | DR | methylenetetrahydrofolate dehydrogenase (NADP+) activity                                                                                                                                                                                                                                                                                                                                                               |
| N | P24186 | DR | one-carbon metabolic process                                                                                                                                                                                                                                                                                                                                                                                           |
| N | P24186 | DR | oxidation-reduction process                                                                                                                                                                                                                                                                                                                                                                                            |
| N | P24186 | DR | purine nucleotide biosynthetic process                                                                                                                                                                                                                                                                                                                                                                                 |
| N | P24219 | CC | Sigma factors are initiation factors that promote the attachment of RNA polymerase to specific initiation sites and are then released                                                                                                                                                                                                                                                                                  |
| N | P24219 | CC | The open complex (sigma-54 and core RNA polymerase) serves as the receptor for receipt of the melting signal from the remotely bound activator protein levR for the expression of the levanase operon.                                                                                                                                                                                                                 |
| N | P24219 | CC | This sigma factor is responsible for the expression of the levanase operon                                                                                                                                                                                                                                                                                                                                             |
| N | P24219 | DE | RNA polymerase sigma-54 factor;                                                                                                                                                                                                                                                                                                                                                                                        |
| N | P24219 | DR | DNA-directed RNA polymerase activity                                                                                                                                                                                                                                                                                                                                                                                   |
| N | P24219 | DR | regulation of transcription, DNA-dependent                                                                                                                                                                                                                                                                                                                                                                             |
| N | P24219 | DR | sequence-specific DNA binding transcription factor activity                                                                                                                                                                                                                                                                                                                                                            |
| N | P24219 | DR | sigma factor activity                                                                                                                                                                                                                                                                                                                                                                                                  |
| N | P24219 | DR | transcription initiation, DNA-dependent                                                                                                                                                                                                                                                                                                                                                                                |
| N | P24483 | CC | Adrenodoxin transfers electrons from adrenodoxin reductase to the cholesterol side chain cleavage cytochrome P450.                                                                                                                                                                                                                                                                                                     |
| N | P24483 | DE | Adrenal ferredoxin;                                                                                                                                                                                                                                                                                                                                                                                                    |
| N | P24483 | DE | Adrenodoxin, mitochondrial;                                                                                                                                                                                                                                                                                                                                                                                            |
| N | P24483 | DE | Ferredoxin-1;                                                                                                                                                                                                                                                                                                                                                                                                          |
| N | P24483 | DR | 2 iron, 2 sulfur cluster binding                                                                                                                                                                                                                                                                                                                                                                                       |
| N | P24483 | DR | NADPH oxidation                                                                                                                                                                                                                                                                                                                                                                                                        |
| N | P24483 | DR | adrenal gland development                                                                                                                                                                                                                                                                                                                                                                                              |
| N | P24483 | DR | cellular response to epinephrine stimulus                                                                                                                                                                                                                                                                                                                                                                              |
| N | P24483 | DR | cellular response to leptin stimulus                                                                                                                                                                                                                                                                                                                                                                                   |
| N | P24483 | DR | cellular response to organic cyclic compound                                                                                                                                                                                                                                                                                                                                                                           |
| N | P24483 | DR | electron carrier activity                                                                                                                                                                                                                                                                                                                                                                                              |
| N | P24483 | DR | electron transport chain                                                                                                                                                                                                                                                                                                                                                                                               |
| N | P24483 | DR | enzyme binding                                                                                                                                                                                                                                                                                                                                                                                                         |
| N | P24483 | DR | iron ion binding                                                                                                                                                                                                                                                                                                                                                                                                       |
| N | P24483 | DR | positive regulation of oxidoreductase activity                                                                                                                                                                                                                                                                                                                                                                         |
| N | P24483 | DR | response to gonadotropin stimulus                                                                                                                                                                                                                                                                                                                                                                                      |

|   |        |    |                                                                                                                                                                                                               |
|---|--------|----|---------------------------------------------------------------------------------------------------------------------------------------------------------------------------------------------------------------|
| N | P24517 | CC | May play a role in the repair of endogenous alkylation damage.                                                                                                                                                |
| N | P24517 | DE | DNA repair protein RadA;                                                                                                                                                                                      |
| N | P24517 | DE | DNA repair protein Sms;                                                                                                                                                                                       |
| N | P24517 | DR | ATP-dependent peptidase activity                                                                                                                                                                              |
| N | P24517 | DR | damaged DNA binding                                                                                                                                                                                           |
| N | P24517 | DR | metal ion binding                                                                                                                                                                                             |
| N | P24517 | DR | serine-type endopeptidase activity                                                                                                                                                                            |
| N | P24589 | CC | Involved in oxygen transport from the lung to the various peripheral tissues.                                                                                                                                 |
| N | P24589 | DE | Alpha-A-globin;                                                                                                                                                                                               |
| N | P24589 | DE | Hemoglobin alpha-A chain;                                                                                                                                                                                     |
| N | P24589 | DE | Hemoglobin subunit alpha-A;                                                                                                                                                                                   |
| N | P24589 | DR | oxygen binding                                                                                                                                                                                                |
| N | P24589 | DR | oxygen transporter activity                                                                                                                                                                                   |
| N | P24685 | CC | Usually encoded in the trnK tRNA gene intron                                                                                                                                                                  |
| N | P24685 | CC | probably assists in splicing its own and other chloroplast group II introns (By similarity)                                                                                                                   |
| N | P24685 | DE | Intron maturase;                                                                                                                                                                                              |
| N | P24685 | DR | mRNA processing                                                                                                                                                                                               |
| N | P24685 | DR | tRNA processing                                                                                                                                                                                               |
| N | P24723 | CC | This is calcium-independent, phospholipid-dependent, serine- and threonine-specific enzyme.                                                                                                                   |
| N | P24723 | DE | Protein kinase C eta type;                                                                                                                                                                                    |
| N | P24723 | DR | enzyme binding                                                                                                                                                                                                |
| N | P24723 | DR | intracellular signal transduction                                                                                                                                                                             |
| N | P24723 | DR | metal ion binding                                                                                                                                                                                             |
| N | P24723 | DR | platelet activation                                                                                                                                                                                           |
| N | P24723 | DR | protein kinase C activity                                                                                                                                                                                     |
| N | P24723 | DR | protein phosphorylation                                                                                                                                                                                       |
| N | P25050 | CC | Acts synergistically with Tip to stimulate NF-kappa-B activity and interleukin-2 gene expression by binding to host TRAF proteins                                                                             |
| N | P25050 | CC | Activation of NF-kappa-B protects lymphocytes from apoptosis, thereby facilitating viral induced cell transformation.                                                                                         |
| N | P25050 | DE | Collagen-like protein;                                                                                                                                                                                        |
| N | P25050 | DE | Saimiri transformation-associated protein;                                                                                                                                                                    |
| N | P25050 | DR | interspecies interaction between organisms                                                                                                                                                                    |
| N | P25229 | CC | Binds actin in a Ca(2+)-independent manner.                                                                                                                                                                   |
| N | P25229 | DE | Actin-binding protein chain A;                                                                                                                                                                                |
| N | P25229 | DE | F-actin-capping protein subunit alpha-1;                                                                                                                                                                      |
| N | P25229 | DR | actin binding                                                                                                                                                                                                 |
| N | P25229 | DR | actin cytoskeleton organization                                                                                                                                                                               |
| N | P25353 | CC | Mediates extracellular nucleotide derived phosphate hydrolysis along with NPP2 and PHO5.                                                                                                                      |
| N | P25353 | DE | Alkaline phosphodiesterase 1;                                                                                                                                                                                 |
| N | P25353 | DE | Ectonucleotide pyrophosphatase/phosphodiesterase 1;                                                                                                                                                           |
| N | P25353 | DE | Nucleotide pyrophosphatase;                                                                                                                                                                                   |
| N | P25353 | DR | cellular response to phosphate starvation                                                                                                                                                                     |
| N | P25353 | DR | nucleoside triphosphate metabolic process                                                                                                                                                                     |
| N | P25353 | DR | nucleoside-triphosphatase activity                                                                                                                                                                            |
| N | P25353 | DR | nucleoside-triphosphate diphosphatase activity                                                                                                                                                                |
| N | P25353 | DR | nucleotide diphosphatase activity                                                                                                                                                                             |
| N | P25353 | DR | phosphodiesterase I activity                                                                                                                                                                                  |
| N | P25402 | CC | Mediates assembly of pili by forming soluble multimeric complexes with pili subunits as an intermediate step in the assembly process                                                                          |
| N | P25402 | CC | This protein is involved in K99 pili assembly.                                                                                                                                                                |
| N | P25402 | DE | Chaperone protein fanE;                                                                                                                                                                                       |
| N | P25402 | DR | cellular cell wall organization                                                                                                                                                                               |
| N | P25669 | CC | Produces peripheral paralysis by blocking neuromuscular transmission at the postsynaptic site                                                                                                                 |
| N | P25669 | CC | Binds to muscular and neuronal (only alpha-7 alpha-8 alpha-9) nicotinic acetylcholine receptors (By similarity).                                                                                              |
| N | P25669 | DE | Long neurotoxin 2;                                                                                                                                                                                            |
| N | P25669 | DR | acetylcholine receptor inhibitor activity                                                                                                                                                                     |
| N | P25669 | DR | synaptic transmission                                                                                                                                                                                         |
| N | P25788 | CC | The proteasome is a multicatalytic proteinase complex which is characterized by its ability to cleave peptides with Arg, Phe, Tyr, Leu, and Glu adjacent to the leaving group at neutral or slightly basic pH |

|   |        |    |                                                                                                                                                                                                                                                                           |
|---|--------|----|---------------------------------------------------------------------------------------------------------------------------------------------------------------------------------------------------------------------------------------------------------------------------|
| N | P25788 | CC | Binds to the C-terminus of CDKN1A and thereby mediates its degradation                                                                                                                                                                                                    |
| N | P25788 | CC | Negatively regulates the membrane trafficking of the cell-surface thromboxane A2 receptor (TBXA2R) isoform 2.                                                                                                                                                             |
| N | P25788 | CC | The proteasome has an ATP-dependent proteolytic activity                                                                                                                                                                                                                  |
| N | P25788 | DE | Macropain subunit C8;                                                                                                                                                                                                                                                     |
| N | P25788 | DE | Multicatalytic endopeptidase complex subunit C8;                                                                                                                                                                                                                          |
| N | P25788 | DE | Proteasome component C8;                                                                                                                                                                                                                                                  |
| N | P25788 | DE | Proteasome subunit alpha type-3;                                                                                                                                                                                                                                          |
| N | P25788 | DR | DNA damage response, signal transduction by p53 class mediator resulting in cell cycle arrest                                                                                                                                                                             |
| N | P25788 | DR | G1/S transition of mitotic cell cycle                                                                                                                                                                                                                                     |
| N | P25788 | DR | M/G1 transition of mitotic cell cycle                                                                                                                                                                                                                                     |
| N | P25788 | DR | S phase of mitotic cell cycle                                                                                                                                                                                                                                             |
| N | P25788 | DR | anaphase-promoting complex-dependent proteasomal ubiquitin-dependent protein catabolic process                                                                                                                                                                            |
| N | P25788 | DR | interspecies interaction between organisms                                                                                                                                                                                                                                |
| N | P25788 | DR | mRNA metabolic process                                                                                                                                                                                                                                                    |
| N | P25788 | DR | negative regulation of ubiquitin-protein ligase activity involved in mitotic cell cycle                                                                                                                                                                                   |
| N | P25788 | DR | positive regulation of ubiquitin-protein ligase activity involved in mitotic cell cycle                                                                                                                                                                                   |
| N | P25788 | DR | protein binding                                                                                                                                                                                                                                                           |
| N | P25788 | DR | regulation of apoptosis                                                                                                                                                                                                                                                   |
| N | P25788 | DR | regulation of cellular amino acid metabolic process                                                                                                                                                                                                                       |
| N | P25788 | DR | threonine-type endopeptidase activity                                                                                                                                                                                                                                     |
| N | P25788 | DR | viral reproduction                                                                                                                                                                                                                                                        |
| N | P25811 | CC | Exhibits a very high intrinsic GTPase hydrolysis rate involved in the addition of a carboxymethylaminomethyl (cmnm) group at the wobble position (U34) of certain tRNAs, forming tRNA- cmnm(5)s(2)U34 (By similarity)                                                     |
| N | P25811 | CC | tRNA modification GTPase mnmE;                                                                                                                                                                                                                                            |
| N | P25811 | DR | GTPase activity                                                                                                                                                                                                                                                           |
| N | P25811 | DR | metal ion binding                                                                                                                                                                                                                                                         |
| N | P25811 | DR | small GTPase mediated signal transduction                                                                                                                                                                                                                                 |
| N | P25811 | DR | tRNA modification                                                                                                                                                                                                                                                         |
| N | P25874 | CC | UCP are mitochondrial transporter proteins that create proton leaks across the inner mitochondrial membrane, thus uncoupling oxidative phosphorylation from ATP synthesis                                                                                                 |
| N | P25874 | CC | As a result, energy is dissipated in the form of heat.                                                                                                                                                                                                                    |
| N | P25874 | DE | Mitochondrial brown fat uncoupling protein 1;                                                                                                                                                                                                                             |
| N | P25874 | DE | Solute carrier family 25 member 7;                                                                                                                                                                                                                                        |
| N | P25874 | DE | Thermogenin;                                                                                                                                                                                                                                                              |
| N | P25874 | DR | brown fat cell differentiation                                                                                                                                                                                                                                            |
| N | P25874 | DR | cellular lipid metabolic process                                                                                                                                                                                                                                          |
| N | P25874 | DR | respiratory electron transport chain                                                                                                                                                                                                                                      |
| N | P25934 | DE | Phosphopentokinase;                                                                                                                                                                                                                                                       |
| N | P25934 | DE | Phosphoribulokinase, 41 kDa subunit;                                                                                                                                                                                                                                      |
| N | P25934 | DR | phosphoribulokinase activity                                                                                                                                                                                                                                              |
| N | P25934 | DR | reductive pentose-phosphate cycle                                                                                                                                                                                                                                         |
| N | P25945 | CC | Interacts with outer membrane receptor proteins that carry out high-affinity binding and energy dependent uptake into the periplasmic space of specific substrates such as cobalamin, and various iron compounds (such as iron dicitrate, enterochelin, aerobactin, etc.) |
| N | P25945 | CC | In the absence of tonB these receptors bind their substrates but do not carry out active transport                                                                                                                                                                        |
| N | P25945 | CC | It could act to transduce energy from the cytoplasmic membrane to specific energy-requiring processes in the outer membrane, resulting in the release into the periplasm of ligands bound by these outer membrane proteins.                                               |
| N | P25945 | CC | TonB also interacts with some colicins and is involved in the energy- dependent, irreversible steps of bacteriophages phi 80 and T1 infection                                                                                                                             |
| N | P25945 | DE | Protein tonB;                                                                                                                                                                                                                                                             |
| N | P25945 | DR | bacteriocin transport                                                                                                                                                                                                                                                     |
| N | P25945 | DR | iron ion transmembrane transporter activity                                                                                                                                                                                                                               |
| N | P25945 | DR | protein transporter activity                                                                                                                                                                                                                                              |
| N | P26182 | CC | Actins are highly conserved proteins that are involved in various types of cell motility and are ubiquitously expressed in all eukaryotic cells.                                                                                                                          |
| N | P26267 | CC | The pyruvate dehydrogenase complex catalyzes the overall conversion of pyruvate to acetyl-CoA and CO(2)                                                                                                                                                                   |

|   |        |    |                                                                                                                                                                  |
|---|--------|----|------------------------------------------------------------------------------------------------------------------------------------------------------------------|
| N | P26267 | CC | it contains multiple copies of three enzymatic components: pyruvate dehydrogenase (E1), dihydrolipoamide acetyltransferase (E2) and lipoamide dehydrogenase (E3) |
| N | P26267 | DE | Pyruvate dehydrogenase E1 component subunit alpha type I, mitochondrial;                                                                                         |
| N | P26267 | DR | oxidation-reduction process                                                                                                                                      |
| N | P26267 | DR | pyruvate dehydrogenase (acetyl-transferring) activity                                                                                                            |
| N | P26767 | CC | Probably activates the RNA polymerase sigma-55 factor at the stage II of sporulation                                                                             |
| N | P26767 | DE | Putative sporulation sigma factor-processing peptidase;                                                                                                          |
| N | P26767 | DR | asexual sporulation                                                                                                                                              |
| N | P26767 | DR | aspartic-type endopeptidase activity                                                                                                                             |
| N | P26767 | DR | sporulation resulting in formation of a cellular spore                                                                                                           |
| N | P26772 | CC | Eukaryotic CPN10 homolog which is essential for mitochondrial protein biogenesis, together with CPN60                                                            |
| N | P26772 | CC | Binds to CPN60 in the presence of Mg-ATP and suppresses the ATPase activity of the latter.                                                                       |
| N | P26772 | DE | 10 kDa chaperonin;                                                                                                                                               |
| N | P26772 | DE | 10 kDa heat shock protein, mitochondrial;                                                                                                                        |
| N | P26772 | DE | Chaperonin 10;                                                                                                                                                   |
| N | P26772 | DR | chaperone binding                                                                                                                                                |
| N | P26772 | DR | protein folding                                                                                                                                                  |
| N | P26772 | DR | response to stress                                                                                                                                               |
| N | P26837 | DE | Uncharacterized protein in sul1 3'region;                                                                                                                        |
| N | P26929 | DE | Urea amidohydrolase subunit alpha;                                                                                                                               |
| N | P26929 | DE | Urease subunit alpha;                                                                                                                                            |
| N | P26929 | DR | nickel ion binding                                                                                                                                               |
| N | P26929 | DR | urea metabolic process                                                                                                                                           |
| N | P26929 | DR | urease activity                                                                                                                                                  |
| N | P26989 | DE | 1,4-alpha-D-glucan glucohydrolase;                                                                                                                               |
| N | P26989 | DE | Glucan 1,4-alpha-glucosidase;                                                                                                                                    |
| N | P26989 | DE | Glucoamylase GLA1;                                                                                                                                               |
| N | P26989 | DR | glucan 1,4-alpha-glucosidase activity                                                                                                                            |
| N | P26989 | DR | polysaccharide catabolic process                                                                                                                                 |
| N | P27054 | CC | Defense against chitin containing fungal pathogens.                                                                                                              |
| N | P27054 | DE | Endochitinase PR4;                                                                                                                                               |
| N | P27054 | DR | cell wall macromolecule catabolic process                                                                                                                        |
| N | P27054 | DR | chitin binding                                                                                                                                                   |
| N | P27054 | DR | chitin catabolic process                                                                                                                                         |
| N | P27054 | DR | chitinase activity                                                                                                                                               |
| N | P27054 | DR | defense response                                                                                                                                                 |
| N | P27061 | DE | Acid phosphatase 1;                                                                                                                                              |
| N | P27061 | DR | acid phosphatase activity                                                                                                                                        |
| N | P27075 | DE | 60S ribosomal protein L41;                                                                                                                                       |
| N | P27075 | DE | 60S ribosomal protein L44;                                                                                                                                       |
| N | P27075 | DR | response to antibiotic                                                                                                                                           |
| N | P27075 | DR | response to cycloheximide                                                                                                                                        |
| N | P27075 | DR | structural constituent of ribosome                                                                                                                               |
| N | P27282 | CC | P123 and P123' are short-lived polypeptides, accumulating during early stage of infection                                                                        |
| N | P27282 | CC | nsP2 has two separate domain with different biological activities                                                                                                |
| N | P27282 | CC | nsP4 is a RNA dependent RNA polymerase                                                                                                                           |
| N | P27282 | CC | After these early events, P123 and P123' are cleaved sequentially into nsP1, nsP2 and nsP3/nsP3'                                                                 |
| N | P27282 | CC | By interacting with nsP4, they start viral genome replication into antigenome                                                                                    |
| N | P27282 | CC | it replicates genomic and antigenomic RNA by recognizing replications specific signals                                                                           |
| N | P27282 | CC | P123 is directly translated from the genome, whereas P123' is a product of the cleavage of P1234                                                                 |
| N | P27282 | CC | The C-terminal section harbors a protease that specifically cleaves and releases the four mature proteins (By similarity).                                       |
| N | P27282 | CC | The N-terminal section is part of the RNA polymerase complex and has RNA trisphosphatase and RNA helicase activity                                               |
| N | P27282 | CC | They localize the viral replication complex to the cytoplasmic surface of modified endosomes and lysosomes                                                       |
| N | P27282 | CC | This 26S mRNA encodes for structural proteins                                                                                                                    |
| N | P27282 | CC | This sequence of delayed processing would allow correct assembly and membrane association of the RNA polymerase complex (By similarity).                         |
| N | P27282 | CC | Transcribes also a 26S subgenomic mRNA by initiating RNA synthesis internally on antigenomic RNA                                                                 |



|   |        |    |                                                                                                                                                                                                                                         |
|---|--------|----|-----------------------------------------------------------------------------------------------------------------------------------------------------------------------------------------------------------------------------------------|
| N | P27282 | CC | nsP4 is a short-lived protein regulated by several ways: the opal codon readthrough and degradation by ubiquitin pathway (By similarity).                                                                                               |
| N | P27282 | DE | Non-structural polyprotein;                                                                                                                                                                                                             |
| N | P27282 | DE | Non-structural protein 1;                                                                                                                                                                                                               |
| N | P27282 | DE | Non-structural protein 2;                                                                                                                                                                                                               |
| N | P27282 | DE | Non-structural protein 3';                                                                                                                                                                                                              |
| N | P27282 | DE | Non-structural protein 3;                                                                                                                                                                                                               |
| N | P27282 | DE | Non-structural protein 4;                                                                                                                                                                                                               |
| N | P27282 | DE | Polyprotein nsP1234;                                                                                                                                                                                                                    |
| N | P27282 | DE | Protease nsP2;                                                                                                                                                                                                                          |
| N | P27282 | DE | RNA-directed RNA polymerase nsP4;                                                                                                                                                                                                       |
| N | P27282 | DE | mRNA-capping enzyme nsP1;                                                                                                                                                                                                               |
| N | P27282 | DR | RNA-directed RNA polymerase activity                                                                                                                                                                                                    |
| N | P27282 | DR | cysteine-type endopeptidase activity                                                                                                                                                                                                    |
| N | P27282 | DR | helicase activity                                                                                                                                                                                                                       |
| N | P27282 | DR | methyltransferase activity                                                                                                                                                                                                              |
| N | P27282 | DR | polynucleotide 5'-phosphatase activity                                                                                                                                                                                                  |
| N | P27282 | DR | viral genome replication                                                                                                                                                                                                                |
| N | P27321 | CC | Specific inhibition of calpain (calcium-dependent cysteine protease)                                                                                                                                                                    |
| N | P27321 | CC | Plays a key role in postmortem tenderization of meat and have been proposed to be involved in muscle protein degradation in living tissue.                                                                                              |
| N | P27321 | DE | Calpain inhibitor;                                                                                                                                                                                                                      |
| N | P27321 | DE | Calpastatin;                                                                                                                                                                                                                            |
| N | P27321 | DR | calcium-dependent cysteine-type endopeptidase inhibitor activity                                                                                                                                                                        |
| N | P27599 | CC | The heterodimer glycoprotein H-glycoprotein L is required for the fusion of viral and plasma membranes leading to virus entry into the host cell                                                                                        |
| N | P27599 | CC | Membrane fusion is mediated by the fusion machinery composed at least of gB and the heterodimer gH/gL (By similarity).                                                                                                                  |
| N | P27599 | DE | Envelope glycoprotein H;                                                                                                                                                                                                                |
| N | P27621 | CC | Catalyzes the addition of a single glycerol-P residue to the prenolpyrophosphate-linked dissacharide, as a primer for polymerisation by tagF (Potential).                                                                               |
| N | P27621 | DE | Major teichoic acid biosynthesis protein B;                                                                                                                                                                                             |
| N | P27621 | DE | Putative CDP-glycerol:glycerophosphate glycerophosphotransferase;                                                                                                                                                                       |
| N | P27621 | DR | CDP-glycerol glycerophosphotransferase activity                                                                                                                                                                                         |
| N | P27621 | DR | cellular cell wall organization                                                                                                                                                                                                         |
| N | P27621 | DR | teichoic acid biosynthetic process                                                                                                                                                                                                      |
| N | P27621 | DR | transferase activity, transferring glycosyl groups                                                                                                                                                                                      |
| N | P27654 | CC | Seems to have esterase activity                                                                                                                                                                                                         |
| N | P27654 | CC | Prefers ester of fatty acids from 4 to 16 carbon atoms.                                                                                                                                                                                 |
| N | P27654 | DE | Temperature shock-inducible protein 1;                                                                                                                                                                                                  |
| N | P27654 | DR | fungal-type cell wall organization                                                                                                                                                                                                      |
| N | P27654 | DR | hydrolase activity                                                                                                                                                                                                                      |
| N | P27654 | DR | response to stress                                                                                                                                                                                                                      |
| N | P27654 | DR | structural constituent of cell wall                                                                                                                                                                                                     |
| N | P27661 | CC | variant histone H2A which replaces conventional H2A in a subset of nucleosomes                                                                                                                                                          |
| N | P27661 | CC | DNA accessibility is regulated via a complex set of post-translational modifications of histones, also called histone code, and nucleosome remodeling                                                                                   |
| N | P27661 | CC | Histones thereby play a central role in transcription regulation, DNA repair, DNA replication and chromosomal stability                                                                                                                 |
| N | P27661 | CC | Nucleosomes wrap and compact DNA into chromatin, limiting DNA accessibility to the cellular machineries which require DNA as a template                                                                                                 |
| N | P27661 | CC | Required for checkpoint-mediated arrest of cell cycle progression in response to low doses of ionizing radiation and for efficient repair of DNA double strand breaks (DSBs) specifically when modified by C- terminal phosphorylation. |
| N | P27661 | DE | Histone H2A.x;                                                                                                                                                                                                                          |
| N | P27661 | DR | damaged DNA binding                                                                                                                                                                                                                     |
| N | P27661 | DR | double-strand break repair via homologous recombination                                                                                                                                                                                 |
| N | P27661 | DR | nucleosome assembly                                                                                                                                                                                                                     |
| N | P27661 | DR | spermatogenesis                                                                                                                                                                                                                         |
| N | P27678 | CC | Shows particularly broad specificity; although bonds involving phenylalanine and leucine are preferred, many others are also cleaved to some extent.                                                                                    |
| N | P27678 | DE | Pepsin I/II;                                                                                                                                                                                                                            |
| N | P27678 | DR | aspartic-type endopeptidase activity                                                                                                                                                                                                    |
| N | P27761 | DE | Amb a 1.3;                                                                                                                                                                                                                              |
| N | P27761 | DE | Antigen Amb a I;                                                                                                                                                                                                                        |

|   |        |    |                                                                                                                                                                                                                                        |
|---|--------|----|----------------------------------------------------------------------------------------------------------------------------------------------------------------------------------------------------------------------------------------|
| N | P27761 | DE | Pollen allergen Amb a 1.3;                                                                                                                                                                                                             |
| N | P27835 | CC | Could be involved in ECA polysaccharide chain elongation.                                                                                                                                                                              |
| N | P27835 | DE | Putative ECA polymerase;                                                                                                                                                                                                               |
| N | P27835 | DR | enterobacterial common antigen biosynthetic process                                                                                                                                                                                    |
| N | P27882 | CC | FAD-dependent sulfhydryl oxidase that catalyzes disulfide bond formation                                                                                                                                                               |
| N | P27882 | CC | Forms a redox cycle with MIA40 that involves a disulfide relay system                                                                                                                                                                  |
| N | P27882 | CC | Important for maintaining the cysteine residues in MIA40 in an oxidized state                                                                                                                                                          |
| N | P27882 | CC | Reduced ERV1 is reoxidized by cytochrome c                                                                                                                                                                                             |
| N | P27882 | CC | Required for the import and folding of small cysteine-containing proteins in the mitochondrial intermembrane space (IMS)                                                                                                               |
| N | P27882 | CC | required for the maturation of cytoplasmic, but not of mitochondrial Fe/S proteins                                                                                                                                                     |
| N | P27882 | DE | 14 kDa regulatory protein;                                                                                                                                                                                                             |
| N | P27882 | DE | Essential for respiration and vegetative growth protein 1;                                                                                                                                                                             |
| N | P27882 | DE | Mitochondrial FAD-linked sulfhydryl oxidase ERV1;                                                                                                                                                                                      |
| N | P27882 | DR | cellular iron ion homeostasis                                                                                                                                                                                                          |
| N | P27882 | DR | cellular response to oxidative stress                                                                                                                                                                                                  |
| N | P27882 | DR | flavin-linked sulfhydryl oxidase activity                                                                                                                                                                                              |
| N | P27882 | DR | oxidation-reduction process                                                                                                                                                                                                            |
| N | P27882 | DR | protein import into mitochondrial intermembrane space                                                                                                                                                                                  |
| N | P27898 | CC | Transcription factor postulated to regulate the biosynthetic pathway of a flavonoid-derived pigment in certain floral tissues.                                                                                                         |
| N | P27898 | DE | Myb-related protein P;                                                                                                                                                                                                                 |
| N | P28147 | CC | General transcription factor that functions at the core of the DNA-binding multiprotein factor TFIID                                                                                                                                   |
| N | P28147 | CC | Binding of TFIID to the TATA box is the initial transcriptional step of the pre-initiation complex (PIC), playing a role in the activation of eukaryotic genes transcribed by RNA polymerase II.                                       |
| N | P28147 | DE | TATA sequence-binding protein 1;                                                                                                                                                                                                       |
| N | P28147 | DE | TATA-binding factor 1;                                                                                                                                                                                                                 |
| N | P28147 | DE | TATA-box factor 1;                                                                                                                                                                                                                     |
| N | P28147 | DE | TATA-box-binding protein 1;                                                                                                                                                                                                            |
| N | P28147 | DE | Transcription initiation factor TFIID TBP-1 subunit;                                                                                                                                                                                   |
| N | P28147 | DR | RNA polymerase II transcription factor activity                                                                                                                                                                                        |
| N | P28147 | DR | protein binding                                                                                                                                                                                                                        |
| N | P28147 | DR | regulation of transcription, DNA-dependent                                                                                                                                                                                             |
| N | P28147 | DR | transcription initiation from RNA polymerase II promoter                                                                                                                                                                               |
| N | P28219 | DE | Tyrosine-protein phosphatase 27;                                                                                                                                                                                                       |
| N | P28219 | DR | protein dephosphorylation                                                                                                                                                                                                              |
| N | P28219 | DR | protein tyrosine phosphatase activity                                                                                                                                                                                                  |
| N | P28229 | CC | One gap junction consists of a cluster of closely packed pairs of transmembrane channels, the connexons, through which materials of low MW diffuse from one cell to a neighboring cell.                                                |
| N | P28229 | DE | Connexin-45;                                                                                                                                                                                                                           |
| N | P28229 | DE | Gap junction alpha-7 protein;                                                                                                                                                                                                          |
| N | P28229 | DE | Gap junction gamma-1 protein;                                                                                                                                                                                                          |
| N | P28229 | DR | cardiac muscle tissue development                                                                                                                                                                                                      |
| N | P28229 | DR | cell development                                                                                                                                                                                                                       |
| N | P28229 | DR | protein binding                                                                                                                                                                                                                        |
| N | P28229 | DR | synaptic transmission                                                                                                                                                                                                                  |
| N | P28229 | DR | vasculogenesis                                                                                                                                                                                                                         |
| N | P28229 | DR | visual perception                                                                                                                                                                                                                      |
| N | P28355 | CC | Single-stranded-DNA-specific exonuclease                                                                                                                                                                                               |
| N | P28355 | CC | Required for many types of recombinational events, although the stringency of the requirement for recJ appears to vary with the type of recombinational event monitored and the other recombination gene products which are available. |
| N | P28355 | DE | Single-stranded-DNA-specific exonuclease recJ;                                                                                                                                                                                         |
| N | P28355 | DR | 5'-3' exonuclease activity                                                                                                                                                                                                             |
| N | P28355 | DR | DNA recombination                                                                                                                                                                                                                      |
| N | P28355 | DR | manganese ion binding                                                                                                                                                                                                                  |
| N | P28355 | DR | nucleic acid binding                                                                                                                                                                                                                   |
| N | P28386 | CC | RuBisCO catalyzes two reactions: the carboxylation of D- ribulose 1,5-bisphosphate, the primary event in carbon dioxide fixation, as well as the oxidative fragmentation of the pentose substrate in the photorespiration process      |
| N | P28386 | CC | Both reactions occur simultaneously and in competition at the same active site (By similarity).                                                                                                                                        |

|   |        |    |                                                                                                                                                                                                                                   |
|---|--------|----|-----------------------------------------------------------------------------------------------------------------------------------------------------------------------------------------------------------------------------------|
| N | P28386 | DE | Ribulose biphosphate carboxylase large chain;                                                                                                                                                                                     |
| N | P28386 | DE | RuBisCO large subunit;                                                                                                                                                                                                            |
| N | P28386 | DR | magnesium ion binding                                                                                                                                                                                                             |
| N | P28386 | DR | monooxygenase activity                                                                                                                                                                                                            |
| N | P28386 | DR | oxidation-reduction process                                                                                                                                                                                                       |
| N | P28386 | DR | photorespiration                                                                                                                                                                                                                  |
| N | P28386 | DR | reductive pentose-phosphate cycle                                                                                                                                                                                                 |
| N | P28386 | DR | ribulose-biphosphate carboxylase activity                                                                                                                                                                                         |
| N | P28419 | CC | RuBisCO catalyzes two reactions: the carboxylation of D- ribulose 1,5-bisphosphate, the primary event in carbon dioxide fixation, as well as the oxidative fragmentation of the pentose substrate in the photorespiration process |
| N | P28419 | CC | Both reactions occur simultaneously and in competition at the same active site (By similarity).                                                                                                                                   |
| N | P28419 | DE | Ribulose biphosphate carboxylase large chain;                                                                                                                                                                                     |
| N | P28419 | DE | RuBisCO large subunit;                                                                                                                                                                                                            |
| N | P28419 | DR | magnesium ion binding                                                                                                                                                                                                             |
| N | P28419 | DR | monooxygenase activity                                                                                                                                                                                                            |
| N | P28419 | DR | oxidation-reduction process                                                                                                                                                                                                       |
| N | P28419 | DR | photorespiration                                                                                                                                                                                                                  |
| N | P28419 | DR | reductive pentose-phosphate cycle                                                                                                                                                                                                 |
| N | P28419 | DR | ribulose-biphosphate carboxylase activity                                                                                                                                                                                         |
| N | P28504 | CC | Hirudin is a potent thrombin-specific protease inhibitor                                                                                                                                                                          |
| N | P28504 | CC | It forms a stable non-covalent complex with alpha- thrombin, thereby abolishing its ability to cleave fibrinogen.                                                                                                                 |
| N | P28504 | DR | serine-type endopeptidase inhibitor activity                                                                                                                                                                                      |
| N | P28609 | CC | Participates actively in the response to hyperosmotic and heat shock by preventing the aggregation of stress-denatured proteins, in association with dnaK and grpE                                                                |
| N | P28609 | CC | GrpE releases ADP from dnaK; ATP binding to dnaK triggers the release of the substrate protein, thus completing the reaction cycle                                                                                                |
| N | P28609 | CC | It is the nucleotide exchange factor for dnaK and may function as a thermosensor                                                                                                                                                  |
| N | P28609 | CC | Several rounds of ATP- dependent interactions between dnaJ, dnaK and grpE are required for fully efficient folding (By similarity).                                                                                               |
| N | P28609 | CC | Unfolded proteins bind initially to dnaJ; upon interaction with the dnaJ-bound protein, dnaK hydrolyzes its bound ATP, resulting in the formation of a stable complex                                                             |
| N | P28609 | DE | HSP-70 cofactor;                                                                                                                                                                                                                  |
| N | P28609 | DE | Protein grpE;                                                                                                                                                                                                                     |
| N | P28609 | DR | adenyl-nucleotide exchange factor activity                                                                                                                                                                                        |
| N | P28609 | DR | chaperone binding                                                                                                                                                                                                                 |
| N | P28609 | DR | protein folding                                                                                                                                                                                                                   |
| N | P28609 | DR | protein homodimerization activity                                                                                                                                                                                                 |
| N | P28609 | DR | response to stress                                                                                                                                                                                                                |
| N | P28734 | CC | Important for the metabolism of amino acids and Krebs- cycle related organic acids                                                                                                                                                |
| N | P28734 | CC | In plants, it is involved in nitrogen metabolism and in aspects of carbon and energy metabolism.                                                                                                                                  |
| N | P28734 | DE | Aspartate aminotransferase, cytoplasmic;                                                                                                                                                                                          |
| N | P28734 | DE | Transaminase A;                                                                                                                                                                                                                   |
| N | P28734 | DR | 2-oxoglutarate metabolic process                                                                                                                                                                                                  |
| N | P28734 | DR | L-aspartate:2-oxoglutarate aminotransferase activity                                                                                                                                                                              |
| N | P28734 | DR | aspartate metabolic process                                                                                                                                                                                                       |
| N | P28734 | DR | biosynthetic process                                                                                                                                                                                                              |
| N | P28734 | DR | glutamate metabolic process                                                                                                                                                                                                       |
| N | P28734 | DR | pyridoxal phosphate binding                                                                                                                                                                                                       |
| N | P28760 | CC | Destroys radicals which are normally produced within the cells and which are toxic to biological systems.                                                                                                                         |
| N | P28760 | DE | Superoxide dismutase [Mn];                                                                                                                                                                                                        |
| N | P28760 | DR | metal ion binding                                                                                                                                                                                                                 |
| N | P28760 | DR | oxidation-reduction process                                                                                                                                                                                                       |
| N | P28760 | DR | superoxide dismutase activity                                                                                                                                                                                                     |
| N | P28760 | DR | superoxide metabolic process                                                                                                                                                                                                      |
| N | P28879 | CC | Alpha-conotoxins act on postsynaptic membranes, they bind to the nicotinic acetylcholine receptors (nAChR) and thus inhibit them                                                                                                  |
| N | P28879 | CC | Has no effect on the release of catecholamines evoked by nicotine.                                                                                                                                                                |
| N | P28879 | DE | Alpha-conotoxin S2;                                                                                                                                                                                                               |
| N | P28879 | DE | Alpha-conotoxin SII;                                                                                                                                                                                                              |
| N | P28879 | DR | acetylcholine receptor inhibitor activity                                                                                                                                                                                         |

|   |        |    |                                                                                                                                                                                                                                                                                                  |
|---|--------|----|--------------------------------------------------------------------------------------------------------------------------------------------------------------------------------------------------------------------------------------------------------------------------------------------------|
| N | P28879 | DR | synaptic transmission                                                                                                                                                                                                                                                                            |
| N | P29110 | CC | May have a structural role to stabilize the lipid body during desiccation of the seed by preventing coalescence of the oil                                                                                                                                                                       |
| N | P29110 | CC | May also provide recognition signals for specific lipase anchorage in lipolysis during seedling growth.                                                                                                                                                                                          |
| N | P29110 | CC | Probably interacts with both lipid and phospholipid moieties of lipid bodies                                                                                                                                                                                                                     |
| N | P29110 | DE | Oleosin Bn-III;                                                                                                                                                                                                                                                                                  |
| N | P29244 | DE | Globin CTT-W;                                                                                                                                                                                                                                                                                    |
| N | P29244 | DR | oxygen binding                                                                                                                                                                                                                                                                                   |
| N | P29244 | DR | oxygen transporter activity                                                                                                                                                                                                                                                                      |
| N | P29398 | CC | DNA-dependent RNA polymerase catalyzes the transcription of DNA into RNA using the four ribonucleoside triphosphates as substrates.                                                                                                                                                              |
| N | P29398 | DE | DNA-directed RNA polymerase subunit beta;                                                                                                                                                                                                                                                        |
| N | P29398 | DE | RNA polymerase subunit beta;                                                                                                                                                                                                                                                                     |
| N | P29398 | DE | RNAP subunit beta;                                                                                                                                                                                                                                                                               |
| N | P29398 | DE | Transcriptase subunit beta;                                                                                                                                                                                                                                                                      |
| N | P29398 | DR | DNA-directed RNA polymerase activity                                                                                                                                                                                                                                                             |
| N | P29398 | DR | ribonucleoside binding                                                                                                                                                                                                                                                                           |
| N | P29422 | CC | Decomposes hydrogen peroxide into water and oxygen; serves to protect cells from the toxic effects of hydrogen peroxide.                                                                                                                                                                         |
| N | P29422 | DR | catalase activity                                                                                                                                                                                                                                                                                |
| N | P29422 | DR | hydrogen peroxide catabolic process                                                                                                                                                                                                                                                              |
| N | P29422 | DR | oxidation-reduction process                                                                                                                                                                                                                                                                      |
| N | P29521 | CC | This protein promotes the GTP-dependent binding of aminoacyl-tRNA to the A-site of ribosomes during protein biosynthesis.                                                                                                                                                                        |
| N | P29521 | DE | EF-1-alpha;                                                                                                                                                                                                                                                                                      |
| N | P29521 | DE | Elongation factor 1-alpha;                                                                                                                                                                                                                                                                       |
| N | P29521 | DR | GTPase activity                                                                                                                                                                                                                                                                                  |
| N | P29521 | DR | translation elongation factor activity                                                                                                                                                                                                                                                           |
| N | P29527 | CC | May have a structural role to stabilize the lipid body during desiccation of the seed by preventing coalescence of the oil                                                                                                                                                                       |
| N | P29527 | CC | May also provide recognition signals for specific lipase anchorage in lipolysis during seedling growth (By similarity).                                                                                                                                                                          |
| N | P29527 | CC | Probably interacts with both lipid and phospholipid moieties of lipid bodies                                                                                                                                                                                                                     |
| N | P29527 | DE | Oleosin 18.2 kDa;                                                                                                                                                                                                                                                                                |
| N | P29963 | CC | Required for the export of heme to the periplasm for the biogenesis of c-type cytochromes (Potential).                                                                                                                                                                                           |
| N | P29963 | DE | Cytochrome c-type biogenesis protein HcdD;                                                                                                                                                                                                                                                       |
| N | P29963 | DE | Heme exporter protein D;                                                                                                                                                                                                                                                                         |
| N | P29963 | DR | cytochrome complex assembly                                                                                                                                                                                                                                                                      |
| N | P29973 | CC | Visual signal transduction is mediated by a G-protein coupled cascade using cGMP as second messenger                                                                                                                                                                                             |
| N | P29973 | CC | This protein can be activated by cyclic GMP which leads to an opening of the cation channel and thereby causing a depolarization of rod photoreceptors.                                                                                                                                          |
| N | P29973 | DE | CNG channel alpha-1;                                                                                                                                                                                                                                                                             |
| N | P29973 | DE | Cyclic nucleotide-gated cation channel 1;                                                                                                                                                                                                                                                        |
| N | P29973 | DE | Cyclic nucleotide-gated channel alpha-1;                                                                                                                                                                                                                                                         |
| N | P29973 | DE | Cyclic nucleotide-gated channel, photoreceptor;                                                                                                                                                                                                                                                  |
| N | P29973 | DE | Rod photoreceptor cGMP-gated channel subunit alpha;                                                                                                                                                                                                                                              |
| N | P29973 | DE | cGMP-gated cation channel alpha-1;                                                                                                                                                                                                                                                               |
| N | P29973 | DR | ion channel activity                                                                                                                                                                                                                                                                             |
| N | P29973 | DR | response to stimulus                                                                                                                                                                                                                                                                             |
| N | P29973 | DR | visual perception                                                                                                                                                                                                                                                                                |
| N | P30160 | DE | Uncharacterized tatC-like protein ycf43;                                                                                                                                                                                                                                                         |
| N | P30557 | CC | Receptor for prostaglandin E2 (PGE2); the EP3 receptor may be involved in inhibition of gastric acid secretion, modulation of neurotransmitter release in central and peripheral neurons, inhibition of sodium and water reabsorption in kidney tubulus and contraction in uterine smooth muscle |
| N | P30557 | CC | The activity of this receptor can couple to both the inhibition of adenylate cyclase mediated by G(i) proteins, and to an elevation of intracellular calcium                                                                                                                                     |
| N | P30557 | CC | The various forms can interact with different second messenger systems.                                                                                                                                                                                                                          |
| N | P30557 | DE | PGE receptor EP3 subtype;                                                                                                                                                                                                                                                                        |
| N | P30557 | DE | PGE2 receptor EP3 subtype;                                                                                                                                                                                                                                                                       |
| N | P30557 | DE | Prostaglandin E2 receptor EP3 subtype;                                                                                                                                                                                                                                                           |
| N | P30557 | DE | Prostanoid EP3 receptor;                                                                                                                                                                                                                                                                         |

|   |        |    |                                                                                                                                                                                  |
|---|--------|----|----------------------------------------------------------------------------------------------------------------------------------------------------------------------------------|
| N | P30557 | DR | G-protein signaling, coupled to cAMP nucleotide second messenger                                                                                                                 |
| N | P30557 | DR | activation of phospholipase C activity by G-protein coupled receptor protein signaling pathway coupled to IP3 second messenger                                                   |
| N | P30557 | DR | bicarbonate transport                                                                                                                                                            |
| N | P30557 | DR | elevation of cytosolic calcium ion concentration                                                                                                                                 |
| N | P30557 | DR | fever generation                                                                                                                                                                 |
| N | P30557 | DR | positive regulation of fever generation                                                                                                                                          |
| N | P30557 | DR | prostaglandin E receptor activity                                                                                                                                                |
| N | P30557 | DR | protein binding                                                                                                                                                                  |
| N | P30713 | CC | Catalyzes the inactivation of reactive sulfate esters in carcinogenic arylmethanols                                                                                              |
| N | P30713 | CC | Highest activity towards ethacrynic acid and cumene hydroperoxide.                                                                                                               |
| N | P30713 | DE | GST class-theta-2;                                                                                                                                                               |
| N | P30713 | DE | Glutathione S-transferase 12;                                                                                                                                                    |
| N | P30713 | DE | Glutathione S-transferase Yrs-Yrs;                                                                                                                                               |
| N | P30713 | DE | Glutathione S-transferase theta-2;                                                                                                                                               |
| N | P30713 | DR | glutathione metabolic process                                                                                                                                                    |
| N | P30713 | DR | glutathione transferase activity                                                                                                                                                 |
| N | P31005 | DE | NAD-dependent methanol dehydrogenase;                                                                                                                                            |
| N | P31005 | DR | metal ion binding                                                                                                                                                                |
| N | P31005 | DR | methanol dehydrogenase activity                                                                                                                                                  |
| N | P31005 | DR | oxidation-reduction process                                                                                                                                                      |
| N | P31261 | CC | Sequence-specific transcription factor which is part of a developmental regulatory system that provides cells with specific positional identities on the anterior-posterior axis |
| N | P31261 | DE | Homeobox protein Hbox-2.8;                                                                                                                                                       |
| N | P31261 | DE | Homeobox protein Hox-A2;                                                                                                                                                         |
| N | P31261 | DE | NvHbox-2.8;                                                                                                                                                                      |
| N | P31261 | DR | multicellular organismal development                                                                                                                                             |
| N | P31261 | DR | regulation of transcription, DNA-dependent                                                                                                                                       |
| N | P31261 | DR | sequence-specific DNA binding                                                                                                                                                    |
| N | P31261 | DR | sequence-specific DNA binding transcription factor activity                                                                                                                      |
| N | P31261 | DR | transcription regulator activity                                                                                                                                                 |
| N | P31272 | CC | Sequence-specific transcription factor which is part of a developmental regulatory system that provides cells with specific positional identities on the anterior-posterior axis |
| N | P31272 | DE | Homeobox protein Hox-B9;                                                                                                                                                         |
| N | P31272 | DR | multicellular organismal development                                                                                                                                             |
| N | P31272 | DR | regulation of transcription, DNA-dependent                                                                                                                                       |
| N | P31272 | DR | sequence-specific DNA binding                                                                                                                                                    |
| N | P31272 | DR | sequence-specific DNA binding transcription factor activity                                                                                                                      |
| N | P31272 | DR | transcription activator activity                                                                                                                                                 |
| N | P31336 | CC | May be a component of the oxygen-evolving complex.                                                                                                                               |
| N | P31336 | DE | Light-regulated unknown 11 kDa protein;                                                                                                                                          |
| N | P31336 | DE | Photosystem II 5 kDa protein, chloroplastic;                                                                                                                                     |
| N | P31336 | DR | photosynthesis                                                                                                                                                                   |
| N | P31391 | CC | Receptor for somatostatin-14                                                                                                                                                     |
| N | P31391 | CC | It is functionally coupled not only to inhibition of adenylate cyclase, but also to activation of both arachidonate release and mitogen-activated protein (MAP) kinase cascade   |
| N | P31391 | CC | Mediates antiproliferative action of somatostatin in tumor cells.                                                                                                                |
| N | P31391 | CC | The activity of this receptor is mediated by G proteins which inhibit adenylate cyclase                                                                                          |
| N | P31391 | DE | Somatostatin receptor type 4;                                                                                                                                                    |
| N | P31391 | DR | G-protein signaling, coupled to cyclic nucleotide second messenger                                                                                                               |
| N | P31391 | DR | negative regulation of cell proliferation                                                                                                                                        |
| N | P31391 | DR | somatostatin receptor activity                                                                                                                                                   |
| N | P31423 | CC | Receptor for glutamate                                                                                                                                                           |
| N | P31423 | CC | The activity of this receptor is mediated by a G-protein that inhibits adenylate cyclase activity.                                                                               |
| N | P31423 | DE | Metabotropic glutamate receptor 4;                                                                                                                                               |
| N | P31423 | DR | G-protein coupled receptor activity                                                                                                                                              |
| N | P31423 | DR | gamma-aminobutyric acid secretion                                                                                                                                                |
| N | P31423 | DR | negative regulation of apoptosis                                                                                                                                                 |
| N | P31423 | DR | negative regulation of cell proliferation                                                                                                                                        |
| N | P31423 | DR | negative regulation of synaptic transmission                                                                                                                                     |
| N | P31423 | DR | neuron projection development                                                                                                                                                    |
| N | P31423 | DR | neuroprotection                                                                                                                                                                  |
| N | P31423 | DR | synaptic transmission, GABAergic                                                                                                                                                 |
| N | P31423 | DR | synaptic transmission, glutamatergic                                                                                                                                             |

|   |        |    |                                                                                                                                                                                                               |
|---|--------|----|---------------------------------------------------------------------------------------------------------------------------------------------------------------------------------------------------------------|
| N | P31433 | DE | Uncharacterized protein yicH;                                                                                                                                                                                 |
| N | P31494 | CC | Expression of the urease operon increases the likelihood of bacterial survival by contributing to acid resistance in vitro and in vivo in BALB/c mice                                                         |
| N | P31494 | CC | <i>Y. enterocolitica</i> enters the body via an oral path and must survive the acidic stomach before being able to colonize the intestinal mucosa (PubMed:7558281).                                           |
| N | P31494 | DE | Urea amidohydrolase subunit alpha;                                                                                                                                                                            |
| N | P31494 | DE | Urease subunit alpha;                                                                                                                                                                                         |
| N | P31494 | DR | nickel ion binding                                                                                                                                                                                            |
| N | P31494 | DR | urea metabolic process                                                                                                                                                                                        |
| N | P31494 | DR | urease activity                                                                                                                                                                                               |
| N | P31610 | CC | Probable component of the transcriptional machinery present in the inner capsid                                                                                                                               |
| N | P31610 | CC | Displays dsRNA binding activity and may play an important role in the sorting of viral RNA and virion assembly                                                                                                |
| N | P31610 | CC | Together with the RNA-directed RNA polymerase P1 and capping enzyme P5, forms an transcriptional complex positioned near the channels situated at each of the five-fold vertices of the core (By similarity). |
| N | P31610 | DE | 60 kDa core protein;                                                                                                                                                                                          |
| N | P31809 | CC | Unknown                                                                                                                                                                                                       |
| N | P31809 | CC | In case of murine coronavirus (MHV) infection, serves as receptor for MHV S1 spike glycoprotein.                                                                                                              |
| N | P31809 | DE | Biliary glycoprotein 1;                                                                                                                                                                                       |
| N | P31809 | DE | Biliary glycoprotein D;                                                                                                                                                                                       |
| N | P31809 | DE | CD66a;                                                                                                                                                                                                        |
| N | P31809 | DE | Carcinoembryonic antigen-related cell adhesion molecule 1;                                                                                                                                                    |
| N | P31809 | DE | Murine hepatitis virus receptor;                                                                                                                                                                              |
| N | P31809 | DR | interspecies interaction between organisms                                                                                                                                                                    |
| N | P31809 | DR | receptor activity                                                                                                                                                                                             |
| N | P31956 | DE | Penicillin G acylase subunit alpha;                                                                                                                                                                           |
| N | P31956 | DE | Penicillin G acylase subunit beta;                                                                                                                                                                            |
| N | P31956 | DE | Penicillin G acylase;                                                                                                                                                                                         |
| N | P31956 | DE | Penicillin G amidase;                                                                                                                                                                                         |
| N | P31956 | DE | Penicillin G amidohydrolase;                                                                                                                                                                                  |
| N | P31956 | DR | antibiotic biosynthetic process                                                                                                                                                                               |
| N | P31956 | DR | metal ion binding                                                                                                                                                                                             |
| N | P31956 | DR | penicillin amidase activity                                                                                                                                                                                   |
| N | P31956 | DR | response to antibiotic                                                                                                                                                                                        |
| N | P32162 | DE | UPF0381 protein yiiS;                                                                                                                                                                                         |
| N | P32247 | CC | Role in sperm cell division, maturation, or function                                                                                                                                                          |
| N | P32247 | CC | This receptor mediates its action by association with G proteins that activate a phosphatidylinositol-calcium second messenger system.                                                                        |
| N | P32247 | DE | Bombesin receptor subtype-3;                                                                                                                                                                                  |
| N | P32247 | DR | adult feeding behavior                                                                                                                                                                                        |
| N | P32247 | DR | bombesin receptor activity                                                                                                                                                                                    |
| N | P32247 | DR | glucose metabolic process                                                                                                                                                                                     |
| N | P32247 | DR | regulation of blood pressure                                                                                                                                                                                  |
| N | P32399 | DE | Uncharacterized protein yhgE;                                                                                                                                                                                 |
| N | P32486 | CC | Involved in the synthesis of (1->6)- and (1->3)-beta-D- glucan polymers of the yeast cell wall in vivo                                                                                                        |
| N | P32486 | CC | It is required for full activity of beta-glucan synthase in vitro                                                                                                                                             |
| N | P32486 | CC | May act as a transglucosidase and contribute to the construction of a protein-bound glucan-structure that acts as an acceptor site for the addition of (1->6)-beta-D-glucan at the cell surface.              |
| N | P32486 | CC | May be involved in the maturation and transport of cell wall proteins (CWP) to the cell wall                                                                                                                  |
| N | P32486 | DE | Beta-glucan synthesis-associated protein KRE6;                                                                                                                                                                |
| N | P32486 | DE | Killer toxin-resistance protein 6;                                                                                                                                                                            |
| N | P32486 | DR | 1,6-beta-glucan biosynthetic process                                                                                                                                                                          |
| N | P32486 | DR | fungal-type cell wall organization                                                                                                                                                                            |
| N | P32486 | DR | glucosidase activity                                                                                                                                                                                          |
| N | P32541 | CC | The surface protein (SU) attaches the virus to the host cell by binding to its receptor                                                                                                                       |
| N | P32541 | CC | Fusion occurs at the host cell plasma membrane (By similarity).                                                                                                                                               |
| N | P32541 | CC | This interaction triggers the refolding of the transmembrane protein (TM) and is thought to activate its fusogenic potential by unmasking its fusion peptide                                                  |
| N | P32541 | DE | Env polypeptide;                                                                                                                                                                                              |
| N | P32541 | DE | Envelope glycoprotein;                                                                                                                                                                                        |

|   |        |    |                                                                                                                                                                                                                                    |
|---|--------|----|------------------------------------------------------------------------------------------------------------------------------------------------------------------------------------------------------------------------------------|
| N | P32541 | DE | Glycoprotein 45;                                                                                                                                                                                                                   |
| N | P32541 | DE | Glycoprotein 90;                                                                                                                                                                                                                   |
| N | P32541 | DE | Surface protein;                                                                                                                                                                                                                   |
| N | P32541 | DE | Transmembrane protein;                                                                                                                                                                                                             |
| N | P32541 | DR | interspecies interaction between organisms                                                                                                                                                                                         |
| N | P32541 | DR | structural molecule activity                                                                                                                                                                                                       |
| N | P32638 | DE | Glyceraldehyde-3-phosphate dehydrogenase;                                                                                                                                                                                          |
| N | P32638 | DR | glyceraldehyde-3-phosphate dehydrogenase (NAD+) (phosphorylating) activity                                                                                                                                                         |
| N | P32638 | DR | oxidation-reduction process                                                                                                                                                                                                        |
| N | P32720 | CC | Part of the binding-protein-dependent transport system AlsBAC for D-allose; probably responsible for the translocation of the substrate across the membrane.                                                                       |
| N | P32720 | DE | D-allose transport system permease protein AlsC;                                                                                                                                                                                   |
| N | P32720 | DR | carbohydrate transport                                                                                                                                                                                                             |
| N | P32720 | DR | transporter activity                                                                                                                                                                                                               |
| N | P32772 | DE | Protein UGX2;                                                                                                                                                                                                                      |
| N | P32772 | DR | protein binding                                                                                                                                                                                                                    |
| N | P32847 | CC | Band 3 has two functional domains: its integral domain mediates a 1:1 exchange of inorganic anions across the membrane, whereas its cytoplasmic domain provides binding sites for cytoskeletal and other proteins (By similarity). |
| N | P32847 | DE | Anion exchange protein 1;                                                                                                                                                                                                          |
| N | P32847 | DE | Anion exchanger 1;                                                                                                                                                                                                                 |
| N | P32847 | DE | Band 3 anion exchange protein;                                                                                                                                                                                                     |
| N | P32847 | DE | Solute carrier family 4 member 1;                                                                                                                                                                                                  |
| N | P32847 | DR | inorganic anion exchanger activity                                                                                                                                                                                                 |
| N | P33150 | CC | Cadherins are calcium dependent cell adhesion proteins                                                                                                                                                                             |
| N | P33150 | CC | May act as a negative regulator of neural cell growth. They preferentially interact with themselves in a homophilic manner in connecting cells; cadherins may thus contribute to the sorting of heterogeneous cell types.          |
| N | P33150 | DE | Cadherin-13;                                                                                                                                                                                                                       |
| N | P33150 | DE | T-cadherin;                                                                                                                                                                                                                        |
| N | P33150 | DE | Truncated cadherin;                                                                                                                                                                                                                |
| N | P33150 | DR | calcium ion binding                                                                                                                                                                                                                |
| N | P33156 | CC | Can catalyze the hydrolysis of ATP in the presence of single-stranded DNA, the ATP-dependent uptake of single-stranded DNA by duplex DNA, and the ATP-dependent hybridization of homologous single-stranded DNAs                   |
| N | P33156 | CC | It interacts with LexA causing its activation and leading to its autocatalytic cleavage.                                                                                                                                           |
| N | P33156 | DE | Protein RecA;                                                                                                                                                                                                                      |
| N | P33156 | DE | Recombinase A;                                                                                                                                                                                                                     |
| N | P33156 | DR | DNA recombination                                                                                                                                                                                                                  |
| N | P33156 | DR | DNA-dependent ATPase activity                                                                                                                                                                                                      |
| N | P33156 | DR | single-stranded DNA binding                                                                                                                                                                                                        |
| N | P33197 | DE | Isocitrate dehydrogenase [NADP];                                                                                                                                                                                                   |
| N | P33197 | DE | NADP(+)-specific ICDH;                                                                                                                                                                                                             |
| N | P33197 | DE | Oxalosuccinate decarboxylase;                                                                                                                                                                                                      |
| N | P33197 | DR | glyoxylate cycle                                                                                                                                                                                                                   |
| N | P33197 | DR | isocitrate dehydrogenase (NADP+) activity                                                                                                                                                                                          |
| N | P33197 | DR | magnesium ion binding                                                                                                                                                                                                              |
| N | P33197 | DR | tricarboxylic acid cycle                                                                                                                                                                                                           |
| N | P33289 | CC | Involved in peroxisome biosynthesis                                                                                                                                                                                                |
| N | P33289 | CC | Essential for growth on oleic acid and methanol as sole carbon source.                                                                                                                                                             |
| N | P33289 | CC | Necessary for matrix peroxisomal proteins import                                                                                                                                                                                   |
| N | P33289 | DE | Peroxisomal biogenesis factor 6;                                                                                                                                                                                                   |
| N | P33289 | DE | Peroxisome biosynthesis protein PAS5;                                                                                                                                                                                              |
| N | P33289 | DR | nucleoside-triphosphatase activity                                                                                                                                                                                                 |
| N | P33289 | DR | peroxisome organization                                                                                                                                                                                                            |
| N | P33655 | CC | DNA primase is the polymerase that synthesizes small RNA primers for the Okazaki fragments on both template strands at replication forks during chromosomal DNA synthesis.                                                         |
| N | P33655 | DE | DNA primase;                                                                                                                                                                                                                       |
| N | P33655 | DR | DNA primase activity                                                                                                                                                                                                               |
| N | P33655 | DR | DNA replication, synthesis of RNA primer                                                                                                                                                                                           |
| N | P33655 | DR | zinc ion binding                                                                                                                                                                                                                   |
| N | P33663 | DE | UPF0124 protein PA4543;                                                                                                                                                                                                            |
| N | P33751 | CC | Confers resistance to cinnamic acid.                                                                                                                                                                                               |
| N | P33751 | DE | Phenylacrylic acid decarboxylase;                                                                                                                                                                                                  |

|   |        |    |                                                                                                          |
|---|--------|----|----------------------------------------------------------------------------------------------------------|
| N | P33751 | DR | carboxy-lyase activity                                                                                   |
| N | P33751 | DR | cinnamic acid catabolic process                                                                          |
| N | P33886 | CC | Dosage-dependent regulator of mitosis with serine/ threonine protein kinase activity                     |
| N | P33886 | CC | It may interact with cdc25, wee1 and win1                                                                |
| N | P33886 | CC | May activate sty1.                                                                                       |
| N | P33886 | CC | May play a role in the integration of nutritional sensing with the control over entry into mitosis       |
| N | P33886 | DE | Protein kinase sty2;                                                                                     |
| N | P33886 | DE | Protein kinase wis1;                                                                                     |
| N | P33886 | DR | G1 to G0 transition                                                                                      |
| N | P33886 | DR | MAP kinase kinase activity                                                                               |
| N | P33886 | DR | cell division                                                                                            |
| N | P33886 | DR | cellular response to hydrogen peroxide                                                                   |
| N | P33886 | DR | positive regulation of establishment of bipolar cell polarity resulting in cell shape                    |
| N | P33886 | DR | protein binding                                                                                          |
| N | P33886 | DR | protein phosphorylation                                                                                  |
| N | P33886 | DR | protein serine/threonine kinase activity                                                                 |
| N | P33886 | DR | regulation of mitotic cell cycle                                                                         |
| N | P33886 | DR | regulation of translation in response to stress                                                          |
| N | P33886 | DR | response to arsenic-containing substance                                                                 |
| N | P33886 | DR | response to osmotic stress                                                                               |
| N | P33886 | DR | stress-activated MAPK cascade                                                                            |
| N | P33898 | DE | Putative glyceraldehyde-3-phosphate dehydrogenase C;                                                     |
| N | P33898 | DR | glyceraldehyde-3-phosphate dehydrogenase (NAD+) (phosphorylating) activity                               |
| N | P33898 | DR | oxidation-reduction process                                                                              |
| N | P33909 | CC | Positive regulation of conjugal transfer of Ti plasmids.                                                 |
| N | P33909 | DE | Transcriptional activator protein traR;                                                                  |
| N | P33909 | DR | quorum sensing                                                                                           |
| N | P33909 | DR | regulation of transcription, DNA-dependent                                                               |
| N | P33909 | DR | sequence-specific DNA binding                                                                            |
| N | P33909 | DR | sequence-specific DNA binding transcription factor activity                                              |
| N | P33909 | DR | two-component response regulator activity                                                                |
| N | P34296 | DE | Uncharacterized protein C06E1.1;                                                                         |
| N | P34296 | DR | protein binding                                                                                          |
| N | P34306 | DE | Uncharacterized protein C06E1.11;                                                                        |
| N | P34610 | DE | Putative serine protease pcp-1;                                                                          |
| N | P34610 | DR | serine-type peptidase activity                                                                           |
| N | P34698 | DE | Uncharacterized protein in CYP107B1 3'region;                                                            |
| N | P34698 | DR | transmembrane transport                                                                                  |
| N | P34812 | CC | Light-harvesting photosynthetic one pigment-protein from the phycocyanin complex                         |
| N | P34812 | CC | Allophycocyanin has a maximum absorption at approximately 650 nanometers.                                |
| N | P34812 | DE | Allophycocyanin subunit B18;                                                                             |
| N | P34812 | DE | Allophycocyanin subunit beta-18;                                                                         |
| N | P34812 | DR | electron transport chain                                                                                 |
| N | P34812 | DR | photosynthesis                                                                                           |
| N | P34812 | DR | protein-chromophore linkage                                                                              |
| N | P34896 | CC | Interconversion of serine and glycine.                                                                   |
| N | P34896 | DE | Glycine hydroxymethyltransferase;                                                                        |
| N | P34896 | DE | Serine hydroxymethyltransferase, cytosolic;                                                              |
| N | P34896 | DE | Serine methylase;                                                                                        |
| N | P34896 | DR | L-serine catabolic process                                                                               |
| N | P34896 | DR | carnitine biosynthetic process                                                                           |
| N | P34896 | DR | folic acid metabolic process                                                                             |
| N | P34896 | DR | glycine hydroxymethyltransferase activity                                                                |
| N | P34896 | DR | one-carbon metabolic process                                                                             |
| N | P34896 | DR | protein homodimerization activity                                                                        |
| N | P34896 | DR | purine base biosynthetic process                                                                         |
| N | P34896 | DR | pyridoxal phosphate binding                                                                              |
| N | P34932 | DE | Heat shock 70 kDa protein 4;                                                                             |
| N | P34932 | DE | Heat shock 70-related protein APG-2;                                                                     |
| N | P34932 | DR | cellular chaperone-mediated protein complex assembly                                                     |
| N | P34932 | DR | protein import into mitochondrial outer membrane                                                         |
| N | P34932 | DR | response to unfolded protein                                                                             |
| N | P35309 | CC | Protamines substitute for histones in the chromatin of sperm during the haploid phase of spermatogenesis |



|   |        |    |                                                                                                                                                                                            |
|---|--------|----|--------------------------------------------------------------------------------------------------------------------------------------------------------------------------------------------|
| N | P35309 | CC | They compact sperm DNA into a highly condensed, stable and inactive complex.                                                                                                               |
| N | P35309 | DE | Cysteine-rich protamine;                                                                                                                                                                   |
| N | P35309 | DE | Sperm protamine P1;                                                                                                                                                                        |
| N | P35309 | DR | chromosome condensation                                                                                                                                                                    |
| N | P35309 | DR | multicellular organismal development                                                                                                                                                       |
| N | P35436 | CC | NMDA receptor subtype of glutamate-gated ion channels possesses high calcium permeability and voltage-dependent sensitivity to magnesium                                                   |
| N | P35436 | CC | Activation requires binding of agonist to both types of subunits.                                                                                                                          |
| N | P35436 | DE | Glutamate [NMDA] receptor subunit epsilon-1;                                                                                                                                               |
| N | P35436 | DE | N-methyl D-aspartate receptor subtype 2A;                                                                                                                                                  |
| N | P35436 | DR | N-methyl-D-aspartate selective glutamate receptor activity                                                                                                                                 |
| N | P35436 | DR | calcium channel activity                                                                                                                                                                   |
| N | P35436 | DR | directional locomotion                                                                                                                                                                     |
| N | P35436 | DR | dopamine metabolic process                                                                                                                                                                 |
| N | P35436 | DR | locomotory behavior                                                                                                                                                                        |
| N | P35436 | DR | negative regulation of protein catabolic process                                                                                                                                           |
| N | P35436 | DR | positive regulation of apoptosis                                                                                                                                                           |
| N | P35436 | DR | protein localization                                                                                                                                                                       |
| N | P35436 | DR | regulation of excitatory postsynaptic membrane potential                                                                                                                                   |
| N | P35436 | DR | regulation of sensory perception of pain                                                                                                                                                   |
| N | P35436 | DR | response to amphetamine                                                                                                                                                                    |
| N | P35436 | DR | response to drug                                                                                                                                                                           |
| N | P35436 | DR | response to ethanol                                                                                                                                                                        |
| N | P35436 | DR | response to wounding                                                                                                                                                                       |
| N | P35436 | DR | sensory perception of pain                                                                                                                                                                 |
| N | P35436 | DR | serotonin metabolic process                                                                                                                                                                |
| N | P35436 | DR | startle response                                                                                                                                                                           |
| N | P35436 | DR | visual learning                                                                                                                                                                            |
| N | P35436 | DR | zinc ion binding                                                                                                                                                                           |
| N | P35508 | CC | Casein kinases are operationally defined by their preferential utilization of acidic proteins such as caseins as substrates                                                                |
| N | P35508 | CC | It can phosphorylate a large number of proteins                                                                                                                                            |
| N | P35508 | CC | Participates in Wnt signaling (By similarity).                                                                                                                                             |
| N | P35508 | DE | Casein kinase I isoform delta;                                                                                                                                                             |
| N | P35508 | DR | Wnt receptor signaling pathway                                                                                                                                                             |
| N | P35508 | DR | circadian regulation of gene expression                                                                                                                                                    |
| N | P35508 | DR | positive regulation of proteasomal ubiquitin-dependent protein catabolic process                                                                                                           |
| N | P35508 | DR | protein phosphorylation                                                                                                                                                                    |
| N | P35508 | DR | protein serine/threonine kinase activity                                                                                                                                                   |
| N | P35508 | DR | regulation of circadian rhythm                                                                                                                                                             |
| N | P35510 | CC | This is a key enzyme of plant metabolism catalyzing the first reaction in the biosynthesis from L-phenylalanine of a wide variety of natural products based on the phenylpropane skeleton. |
| N | P35510 | DE | Phenylalanine ammonia-lyase 1;                                                                                                                                                             |
| N | P35510 | DR | L-phenylalanine catabolic process                                                                                                                                                          |
| N | P35510 | DR | biosynthetic process                                                                                                                                                                       |
| N | P35510 | DR | drought recovery                                                                                                                                                                           |
| N | P35510 | DR | lignin catabolic process                                                                                                                                                                   |
| N | P35510 | DR | phenylalanine ammonia-lyase activity                                                                                                                                                       |
| N | P35510 | DR | pollen development                                                                                                                                                                         |
| N | P35510 | DR | response to UV-B                                                                                                                                                                           |
| N | P35510 | DR | response to karrikin                                                                                                                                                                       |
| N | P35510 | DR | response to oxidative stress                                                                                                                                                               |
| N | P35510 | DR | salicylic acid catabolic process                                                                                                                                                           |
| N | P35567 | CC | Plays a key role in the control of the eukaryotic cell cycle                                                                                                                               |
| N | P35567 | CC | Component of the kinase complex that phosphorylates the repetitive C-terminus of RNA polymerase II (By similarity).                                                                        |
| N | P35567 | CC | It is required in higher cells for entry into S-phase and mitosis                                                                                                                          |
| N | P35567 | DE | Cell division control protein 2 homolog 1;                                                                                                                                                 |
| N | P35567 | DE | Cell division control protein 2-A;                                                                                                                                                         |
| N | P35567 | DE | Cell division protein kinase 1-A;                                                                                                                                                          |
| N | P35567 | DE | Cyclin-dependent kinase 1-A;                                                                                                                                                               |
| N | P35567 | DE | p34 protein kinase 1;                                                                                                                                                                      |
| N | P35567 | DR | RNA polymerase II carboxy-terminal domain kinase activity                                                                                                                                  |
| N | P35567 | DR | cell division                                                                                                                                                                              |

|   |        |    |                                                                                                                                                                                                                                                         |
|---|--------|----|---------------------------------------------------------------------------------------------------------------------------------------------------------------------------------------------------------------------------------------------------------|
| N | P35567 | DR | cyclin-dependent protein kinase activity                                                                                                                                                                                                                |
| N | P35567 | DR | protein binding                                                                                                                                                                                                                                         |
| N | P35567 | DR | protein phosphorylation                                                                                                                                                                                                                                 |
| N | P35833 | CC | Granulocyte/macrophage colony-stimulating factors are cytokines that act in hematopoiesis by controlling the production, differentiation, and function of 2 related white cell populations of the blood, the granulocytes and the monocytes-macrophages |
| N | P35833 | CC | This CSF induces granulocytes.                                                                                                                                                                                                                          |
| N | P35833 | DE | Granulocyte colony-stimulating factor;                                                                                                                                                                                                                  |
| N | P35833 | DR | cytokine activity                                                                                                                                                                                                                                       |
| N | P35833 | DR | growth factor activity                                                                                                                                                                                                                                  |
| N | P35833 | DR | immune response                                                                                                                                                                                                                                         |
| N | P35959 | CC | Bypasses host T-cell signaling by inducing a transcriptional program nearly identical to that of anti-CD3 cell activation                                                                                                                               |
| N | P35959 | CC | Extracellular Nef protein targets CD4(+) T-lymphocytes for apoptosis by interacting with CXCR4 surface receptors (By similarity).                                                                                                                       |
| N | P35959 | CC | Factor of infectivity and pathogenicity, required for optimal virus replication                                                                                                                                                                         |
| N | P35959 | CC | Alters numerous pathways of T-lymphocytes function and downregulates immunity surface molecules in order to evade host defense and increase viral infectivity                                                                                           |
| N | P35959 | CC | Alters the functionality of other immunity cells, like dendritic cells, monocytes/macrophages and NK cells                                                                                                                                              |
| N | P35959 | CC | Increasing surface FasL molecules and decreasing surface MHC-I molecules on infected CD4(+) cells send attacking cytotoxic CD8+ T-lymphocytes into apoptosis (By similarity).                                                                           |
| N | P35959 | CC | Interaction with TCR-zeta chain up-regulates the Fas ligand (FasL)                                                                                                                                                                                      |
| N | P35959 | CC | One of the earliest and most abundantly expressed viral proteins (By similarity).                                                                                                                                                                       |
| N | P35959 | DE | C-terminal core protein;                                                                                                                                                                                                                                |
| N | P35959 | DE | Negative factor;                                                                                                                                                                                                                                        |
| N | P35959 | DE | Protein Nef;                                                                                                                                                                                                                                            |
| N | P35959 | DR | SH3 domain binding                                                                                                                                                                                                                                      |
| N | P35959 | DR | evasion by virus of host immune response                                                                                                                                                                                                                |
| N | P35959 | DR | regulation of defense response to virus by virus                                                                                                                                                                                                        |
| N | P36026 | DE | Deubiquitinating enzyme 11;                                                                                                                                                                                                                             |
| N | P36026 | DE | Ubiquitin carboxyl-terminal hydrolase 11;                                                                                                                                                                                                               |
| N | P36026 | DE | Ubiquitin thiolesterase 11;                                                                                                                                                                                                                             |
| N | P36026 | DE | Ubiquitin-specific-processing protease 11;                                                                                                                                                                                                              |
| N | P36026 | DR | ubiquitin thiolesterase activity                                                                                                                                                                                                                        |
| N | P36026 | DR | ubiquitin-dependent protein catabolic process                                                                                                                                                                                                           |
| N | P36026 | DR | ubiquitin-specific protease activity                                                                                                                                                                                                                    |
| N | P36087 | DE | Uncharacterized protein YKL070W;                                                                                                                                                                                                                        |
| N | P36335 | CC | This protein is a cell adhesion molecule involved in neuron-neuron adhesion, neurite fasciculation, outgrowth of neurites, etc.                                                                                                                         |
| N | P36335 | DE | Neural cell adhesion molecule 1-B;                                                                                                                                                                                                                      |
| N | P36335 | DR | cell adhesion                                                                                                                                                                                                                                           |
| N | P36454 | CC | One of the primary rRNA binding proteins, it binds directly to 16S rRNA where it nucleates assembly of the body of the 30S subunit (By similarity).                                                                                                     |
| N | P36454 | DE | 30S ribosomal protein S4, chloroplastic;                                                                                                                                                                                                                |
| N | P36454 | DR | structural constituent of ribosome                                                                                                                                                                                                                      |
| N | P36787 | CC | E2 regulates viral transcription and DNA replication                                                                                                                                                                                                    |
| N | P36787 | CC | It binds to the E2RE response element (5'-ACNNNNNNNGGT-3') present in multiple copies in the regulatory region                                                                                                                                          |
| N | P36787 | CC | It can either activate or repress transcription depending on E2RE's position with regards to proximal promoter elements                                                                                                                                 |
| N | P36787 | CC | Repression occurs by sterically hindering the assembly of the transcription initiation complex                                                                                                                                                          |
| N | P36787 | CC | The E1-E2 complex binds to the origin of DNA replication.                                                                                                                                                                                               |
| N | P36787 | DE | Regulatory protein E2;                                                                                                                                                                                                                                  |
| N | P36787 | DR | DNA replication                                                                                                                                                                                                                                         |
| N | P36787 | DR | nucleotide binding                                                                                                                                                                                                                                      |
| N | P36787 | DR | regulation of DNA replication                                                                                                                                                                                                                           |
| N | P36787 | DR | regulation of transcription, DNA-dependent                                                                                                                                                                                                              |
| N | P36787 | DR | sequence-specific DNA binding transcription factor activity                                                                                                                                                                                             |
| N | P36787 | DR | viral reproduction                                                                                                                                                                                                                                      |
| N | P36821 | CC | E7 protein has both transforming and trans-activating activities                                                                                                                                                                                        |
| N | P36821 | CC | Disrupts the function of host retinoblastoma protein RB1/pRb, which is a key regulator of the cell cycle                                                                                                                                                |

|   |        |    |                                                                                                                                                                                  |
|---|--------|----|----------------------------------------------------------------------------------------------------------------------------------------------------------------------------------|
| N | P36821 | CC | inactivation or the ability of RB1 to arrest the cell cycle is critical for cellular transformation, uncontrolled cellular growth and proliferation induced by viral infection   |
| N | P36821 | CC | Induces the disassembly of the E2F1 transcription factors from RB1, with subsequent transcriptional activation of E2F1-regulated S-phase genes                                   |
| N | P36821 | CC | Interferes with histone deacetylation mediated by HDAC1 and HDAC2, leading to activation of transcription (By similarity).                                                       |
| N | P36821 | CC | Stimulation of progression from G1 to S phase allows the virus to efficiently use the cellular DNA replicating machinery to achieve viral genome replication                     |
| N | P36821 | DR | interspecies interaction between organisms                                                                                                                                       |
| N | P36821 | DR | metal ion binding                                                                                                                                                                |
| N | P36821 | DR | regulation of transcription, DNA-dependent                                                                                                                                       |
| N | P36821 | DR | sequence-specific DNA binding transcription factor activity                                                                                                                      |
| N | P36961 | CC | Kills Lactococci.                                                                                                                                                                |
| N | P36961 | DE | Bacteriocin lactococcin-G subunit alpha;                                                                                                                                         |
| N | P36961 | DR | defense response to bacterium                                                                                                                                                    |
| N | P36976 | CC | May play an important role in the synaptic function of specific neuronal systems                                                                                                 |
| N | P36976 | CC | Associates with proteins involved in vesicle docking and membrane fusion.                                                                                                        |
| N | P36976 | DE | Synaptosomal-associated 25 kDa protein;                                                                                                                                          |
| N | P36976 | DE | Synaptosomal-associated protein 25;                                                                                                                                              |
| N | P37417 | CC | Cell wall formation.                                                                                                                                                             |
| N | P37417 | DE | UDP-N-acetylenolpyruvoylglucosamine reductase;                                                                                                                                   |
| N | P37417 | DE | UDP-N-acetylmuramate dehydrogenase;                                                                                                                                              |
| N | P37417 | DR | UDP-N-acetylmuramate dehydrogenase activity                                                                                                                                      |
| N | P37417 | DR | cell division                                                                                                                                                                    |
| N | P37417 | DR | cellular cell wall organization                                                                                                                                                  |
| N | P37417 | DR | flavin adenine dinucleotide binding                                                                                                                                              |
| N | P37417 | DR | oxidation-reduction process                                                                                                                                                      |
| N | P37417 | DR | peptidoglycan biosynthetic process                                                                                                                                               |
| N | P37417 | DR | regulation of cell shape                                                                                                                                                         |
| N | P37538 | DE | Uncharacterized protein yaaQ;                                                                                                                                                    |
| N | P37640 | DE | Putative HTH-type transcriptional regulator yhjB;                                                                                                                                |
| N | P37640 | DR | protein binding                                                                                                                                                                  |
| N | P37640 | DR | regulation of transcription, DNA-dependent                                                                                                                                       |
| N | P37640 | DR | sequence-specific DNA binding                                                                                                                                                    |
| N | P37640 | DR | sequence-specific DNA binding transcription factor activity                                                                                                                      |
| N | P37640 | DR | two-component response regulator activity                                                                                                                                        |
| N | P37681 | DE | Putative outer membrane protein yiaT;                                                                                                                                            |
| N | P37685 | CC | Catalyzes the NADP-dependent oxidation of diverse aldehydes such as chloroacetaldehyde, acetaldehyde, propionaldehyde, benzaldehyde, mafosfamide, 4- hydroperoxycyclophosphamide |
| N | P37685 | CC | Its preferred substrates are acetaldehyde and chloroacetaldehyde.                                                                                                                |
| N | P37685 | DE | Aldehyde dehydrogenase B;                                                                                                                                                        |
| N | P37685 | DR | aldehyde dehydrogenase (NAD) activity                                                                                                                                            |
| N | P37685 | DR | oxidation-reduction process                                                                                                                                                      |
| N | P37685 | DR | protein binding                                                                                                                                                                  |
| N | P37685 | DR | response to DNA damage stimulus                                                                                                                                                  |
| N | P37685 | DR | response to ethanol                                                                                                                                                              |
| N | P37695 | CC | Probably activates the acyl carrier protein (ACP) domain or netM, by transferring the 4'-phosphopantetheinyl moiety of coenzyme A (CoA) to a serine residue                      |
| N | P37695 | CC | May be required for maintaining vegetative growth and probably acts via hetN to inhibit differentiation.                                                                         |
| N | P37695 | DE | 4'-phosphopantetheinyl transferase hetI;                                                                                                                                         |
| N | P37695 | DR | holo-[acyl-carrier-protein] synthase activity                                                                                                                                    |
| N | P37695 | DR | macromolecule biosynthetic process                                                                                                                                               |
| N | P37695 | DR | magnesium ion binding                                                                                                                                                            |
| N | P38061 | DE | 60S ribosomal protein L32;                                                                                                                                                       |
| N | P38061 | DR | structural constituent of ribosome                                                                                                                                               |
| N | P38076 | DE | Cysteine synthase;                                                                                                                                                               |
| N | P38076 | DE | O-acetylserine (thiol)-lyase;                                                                                                                                                    |
| N | P38076 | DE | O-acetylserine sulfhydrylase;                                                                                                                                                    |
| N | P38076 | DR | cysteine biosynthetic process from serine                                                                                                                                        |
| N | P38076 | DR | cysteine synthase activity                                                                                                                                                       |
| N | P38076 | DR | pyridoxal phosphate binding                                                                                                                                                      |
| N | P38076 | DR | transferase activity                                                                                                                                                             |
| N | P38079 | DE | Protein YRO2;                                                                                                                                                                    |

|   |        |    |                                                                                                                               |
|---|--------|----|-------------------------------------------------------------------------------------------------------------------------------|
| N | P38079 | DR | ion channel activity                                                                                                          |
| N | P38180 | DE | Uncharacterized protein YBL081W;                                                                                              |
| N | P38180 | DR | protein binding                                                                                                               |
| N | P38266 | DE | Altered inheritance of mitochondria protein 3;                                                                                |
| N | P38266 | DR | actin cortical patch assembly                                                                                                 |
| N | P38266 | DR | protein binding                                                                                                               |
| N | P38274 | CC | Involved in the control of the cell cycle at the G2/M (mitosis) transition                                                    |
| N | P38274 | CC | Acts as a negative regulator of the filamentous growth-signaling pathway through inhibition of STE20.                         |
| N | P38274 | CC | Cooperates with HSL1 to hyperphosphorylate SWE1, thereby targeting SWE1 for polyubiquitination and subsequent degradation     |
| N | P38274 | DE | Protein arginine N-methyltransferase HSL7;                                                                                    |
| N | P38274 | DR | G2/M transition of mitotic cell cycle                                                                                         |
| N | P38274 | DR | cell division                                                                                                                 |
| N | P38274 | DR | cell morphogenesis                                                                                                            |
| N | P38274 | DR | histone-arginine N-methyltransferase activity                                                                                 |
| N | P38274 | DR | identical protein binding                                                                                                     |
| N | P38274 | DR | positive regulation of mitosis                                                                                                |
| N | P38274 | DR | protein-arginine omega-N monomethyltransferase activity                                                                       |
| N | P38274 | DR | protein-arginine omega-N symmetric methyltransferase activity                                                                 |
| N | P38375 | CC | Involved in protein export                                                                                                    |
| N | P38375 | CC | Interacts with secA and secE to allow the translocation of proteins across the plasma membrane, by forming part of a channel. |
| N | P38375 | DE | Preprotein translocase subunit secY;                                                                                          |
| N | P38375 | DR | P-P-bond-hydrolysis-driven protein transmembrane transporter activity                                                         |
| N | P38511 | CC | This protein binds specifically to 23S rRNA; its binding is stimulated by other ribosomal proteins, e.g., L4, L17, and L20    |
| N | P38511 | CC | It is important during the early stages of 50S assembly                                                                       |
| N | P38511 | CC | It makes multiple contacts with different domains of the 23S rRNA in the assembled 50S subunit and ribosome (By similarity).  |
| N | P38511 | DE | 50S ribosomal protein L22;                                                                                                    |
| N | P38511 | DR | structural constituent of ribosome                                                                                            |
| N | P38891 | CC | Catalyzes the first reaction in the catabolism of the essential branched chain amino acids leucine, isoleucine, and valine    |
| N | P38891 | CC | Appears to be involved in the regulation of the transition from G1 to S phase in the cell cycle                               |
| N | P38891 | CC | High copy suppressor of a temperature-sensitive mutation in the ABC transporter, ATM1.                                        |
| N | P38891 | DE | Branched-chain-amino-acid aminotransferase, mitochondrial;                                                                    |
| N | P38891 | DE | Protein ECA39;                                                                                                                |
| N | P38891 | DE | Protein TWT1;                                                                                                                 |
| N | P38891 | DR | L-isoleucine transaminase activity                                                                                            |
| N | P38891 | DR | L-leucine transaminase activity                                                                                               |
| N | P38891 | DR | L-valine transaminase activity                                                                                                |
| N | P38891 | DR | branched chain family amino acid biosynthetic process                                                                         |
| N | P38891 | DR | branched chain family amino acid catabolic process                                                                            |
| N | P38891 | DR | cellular response to UV                                                                                                       |
| N | P38891 | DR | mitotic cell cycle G1/S transition DNA damage checkpoint                                                                      |
| N | P38958 | CC | Required for the biogenesis of cytochrome c oxidase                                                                           |
| N | P38958 | CC | Probably for its assembly into an active holoenzyme.                                                                          |
| N | P38958 | DE | Protein PET100, mitochondrial;                                                                                                |
| N | P38958 | DR | aerobic respiration                                                                                                           |
| N | P38958 | DR | mitochondrial respiratory chain complex IV assembly                                                                           |
| N | P38958 | DR | unfolded protein binding                                                                                                      |
| N | P39149 | CC | Catalyzes the conversion of uracil and 5-phospho-alpha- D-ribose 1-diphosphate (PRPP) to UMP and diphosphate (By similarity). |
| N | P39149 | DE | UMP pyrophosphorylase;                                                                                                        |
| N | P39149 | DE | Uracil phosphoribosyltransferase;                                                                                             |
| N | P39149 | DR | nucleoside metabolic process                                                                                                  |
| N | P39149 | DR | uracil phosphoribosyltransferase activity                                                                                     |
| N | P39149 | DR | uracil salvage                                                                                                                |
| N | P39151 | DE | Stage II sporulation protein R;                                                                                               |
| N | P39151 | DR | sporulation resulting in formation of a cellular spore                                                                        |
| N | P39434 | CC | Murein-degrading enzyme                                                                                                       |

|   |        |    |                                                                                                                                                                                                               |
|---|--------|----|---------------------------------------------------------------------------------------------------------------------------------------------------------------------------------------------------------------|
| N | P39434 | CC | Catalyzes the cleavage of the glycosidic bonds between N-acetylmuramic acid and N- acetylglucosamine residues in peptidoglycan                                                                                |
| N | P39434 | CC | May play a role in recycling of muopeptides during cell elongation and/or cell division (By similarity).                                                                                                      |
| N | P39434 | DE | Peptidoglycan lytic exotransglycosylase;                                                                                                                                                                      |
| N | P39434 | DE | Soluble lytic murein transglycosylase;                                                                                                                                                                        |
| N | P39434 | DR | carbon-oxygen lyase activity, acting on polysaccharides                                                                                                                                                       |
| N | P39434 | DR | cellular cell wall organization                                                                                                                                                                               |
| N | P39434 | DR | hydrolase activity, hydrolyzing O-glycosyl compounds                                                                                                                                                          |
| N | P39434 | DR | lytic transglycosylase activity                                                                                                                                                                               |
| N | P39434 | DR | peptidoglycan metabolic process                                                                                                                                                                               |
| N | P39514 | CC | This endonuclease is specific to the nrdB gene splice junction and is involved in intron homing (By similarity).                                                                                              |
| N | P39514 | DE | Defective intron-associated endonuclease 3;                                                                                                                                                                   |
| N | P39514 | DR | endonuclease activity                                                                                                                                                                                         |
| N | P39514 | DR | intron homing                                                                                                                                                                                                 |
| N | P39696 | CC | Dispensable for transformability                                                                                                                                                                              |
| N | P39696 | CC | Not known if it can act as a pyrroline-5-carboxylate reductase.                                                                                                                                               |
| N | P39696 | DE | ComE operon protein 4;                                                                                                                                                                                        |
| N | P39696 | DR | oxidation-reduction process                                                                                                                                                                                   |
| N | P39696 | DR | proline biosynthetic process                                                                                                                                                                                  |
| N | P39696 | DR | pyrroline-5-carboxylate reductase activity                                                                                                                                                                    |
| N | P39785 | CC | Functions as a terminase.                                                                                                                                                                                     |
| N | P39785 | DE | PBSX phage terminase small subunit;                                                                                                                                                                           |
| N | P39785 | DR | DNA packaging                                                                                                                                                                                                 |
| N | P39918 | DE | Replication-associated recombination protein A;                                                                                                                                                               |
| N | P39918 | DR | nucleoside-triphosphatase activity                                                                                                                                                                            |
| N | P40034 | CC | Histone demethylase that specifically demethylates 'Lys- 36' of histone H3, thereby playing a central role in histone code                                                                                    |
| N | P40034 | CC | Does not demethylate H3 'Lys-4' nor 'Lys-79'.                                                                                                                                                                 |
| N | P40034 | DE | JmjC domain-containing histone demethylation protein 1;                                                                                                                                                       |
| N | P40034 | DE | Jumonji/ARID domain-containing protein 1;                                                                                                                                                                     |
| N | P40034 | DE | [Histone-H3]-lysine-36 demethylase 1;                                                                                                                                                                         |
| N | P40034 | DR | histone demethylase activity (H3-K36 specific)                                                                                                                                                                |
| N | P40034 | DR | methylated histone residue binding                                                                                                                                                                            |
| N | P40034 | DR | oxidation-reduction process                                                                                                                                                                                   |
| N | P40034 | DR | oxidoreductase activity, acting on single donors with incorporation of molecular oxygen, incorporation of two atoms of oxygen                                                                                 |
| N | P40034 | DR | zinc ion binding                                                                                                                                                                                              |
| N | P40042 | CC | May be involved in the modulation of rDNA transcription.                                                                                                                                                      |
| N | P40042 | DE | Regulator of rDNA transcription protein 13;                                                                                                                                                                   |
| N | P40304 | CC | The proteasome is a multicatalytic proteinase complex which is characterized by its ability to cleave peptides with Arg, Phe, Tyr, Leu, and Glu adjacent to the leaving group at neutral or slightly basic pH |
| N | P40304 | CC | The proteasome has an ATP-dependent proteolytic activity.                                                                                                                                                     |
| N | P40304 | DE | Proteasome 26 kDa subunit;                                                                                                                                                                                    |
| N | P40304 | DE | Proteasome subunit beta type-1;                                                                                                                                                                               |
| N | P40304 | DR | protein binding                                                                                                                                                                                               |
| N | P40304 | DR | proteolysis involved in cellular protein catabolic process                                                                                                                                                    |
| N | P40304 | DR | threonine-type endopeptidase activity                                                                                                                                                                         |
| N | P40343 | CC | Component of the ESCRT-0 complex which is the sorting receptor for ubiquitinated cargo proteins at the multivesicular body (MVB) and recruits ESCRT-I to the MVB outer membrane                               |
| N | P40343 | CC | Allows VPS10 to return to the (trans-Golgi network) TGN from the PVC                                                                                                                                          |
| N | P40343 | CC | Controls exit from the prevacuolar compartment (PVC) in both the forward direction to the vacuole and the return to the Golgi                                                                                 |
| N | P40343 | CC | Might also function as an alternate adapter in the COPIb clathrin-like coat.                                                                                                                                  |
| N | P40343 | DE | Golgi retention defective protein 11;                                                                                                                                                                         |
| N | P40343 | DE | Vacuolar protein sorting-associated protein 27;                                                                                                                                                               |
| N | P40343 | DR | late endosome to vacuole transport                                                                                                                                                                            |
| N | P40343 | DR | phosphatidylinositol-3-phosphate binding                                                                                                                                                                      |
| N | P40343 | DR | protein retention in Golgi apparatus                                                                                                                                                                          |
| N | P40343 | DR | protein targeting to vacuole                                                                                                                                                                                  |
| N | P40343 | DR | ubiquitin binding                                                                                                                                                                                             |
| N | P40343 | DR | zinc ion binding                                                                                                                                                                                              |

|   |        |    |                                                                                                                                                                                               |
|---|--------|----|-----------------------------------------------------------------------------------------------------------------------------------------------------------------------------------------------|
| N | P40462 | CC | Putative zinc aminopeptidase which may be involved in ribosome biogenesis.                                                                                                                    |
| N | P40462 | DE | 108 kDa translation machinery-associated protein;                                                                                                                                             |
| N | P40462 | DE | Protein TMA108;                                                                                                                                                                               |
| N | P40462 | DR | aminopeptidase activity                                                                                                                                                                       |
| N | P40462 | DR | metallopeptidase activity                                                                                                                                                                     |
| N | P40462 | DR | ribosome biogenesis                                                                                                                                                                           |
| N | P40462 | DR | zinc ion binding                                                                                                                                                                              |
| N | P40536 | DE | Putative uncharacterized protein YIL032C;                                                                                                                                                     |
| N | P40653 | DE | SRY-related protein MG44;                                                                                                                                                                     |
| N | P40692 | CC | Heterodimerizes with PMS2 to form MutL alpha, a component of the post-replicative DNA mismatch repair system (MMR)                                                                            |
| N | P40692 | CC | Also implicated in DNA damage signaling, a process which induces cell cycle arrest and can lead to apoptosis in case of major DNA damages                                                     |
| N | P40692 | CC | Assembly of the MutL-MutS- heteroduplex ternary complex in presence of RFC and PCNA is sufficient to activate endonuclease activity of PMS2                                                   |
| N | P40692 | CC | DNA methylation would prevent cleavage and therefore assure that only the newly mutated DNA strand is going to be corrected                                                                   |
| N | P40692 | CC | DNA repair is initiated by MutS alpha (MSH2-MSH10) or MutS beta (MSH2-MSH6) binding to a dsDNA mismatch, then MutL alpha is recruited to the heteroduplex                                     |
| N | P40692 | CC | Heterodimerizes with MLH3 to form MutL gamma which plays a role in meiosis.                                                                                                                   |
| N | P40692 | CC | It introduces single-strand breaks near the mismatch and thus generates new entry points for the exonuclease EXO1 to degrade the strand containing the mismatch                               |
| N | P40692 | CC | MutL alpha (MLH1-PMS2) interacts physically with the clamp loader subunits of DNA polymerase III, suggesting that it may play a role to recruit the DNA polymerase III to the site of the MMR |
| N | P40692 | DE | DNA mismatch repair protein Mlh1;                                                                                                                                                             |
| N | P40692 | DE | MutL protein homolog 1;                                                                                                                                                                       |
| N | P40692 | DR | ATPase activity                                                                                                                                                                               |
| N | P40692 | DR | mismatch repair                                                                                                                                                                               |
| N | P40692 | DR | protein binding                                                                                                                                                                               |
| N | P40692 | DR | somatic hypermutation of immunoglobulin genes                                                                                                                                                 |
| N | P41016 | CC | Affects cell viability at low temperatures.                                                                                                                                                   |
| N | P41016 | DE | Cold shock protein CspB;                                                                                                                                                                      |
| N | P41016 | DR | regulation of transcription, DNA-dependent                                                                                                                                                    |
| N | P41016 | DR | response to stress                                                                                                                                                                            |
| N | P41067 | CC | Involved in F pilus assembly.                                                                                                                                                                 |
| N | P41067 | DE | Protein traB;                                                                                                                                                                                 |
| N | P41182 | CC | Transcriptional repressor which is required for germinal center formation and antibody affinity maturation                                                                                    |
| N | P41182 | CC | Probably plays an important role in lymphomagenesis.                                                                                                                                          |
| N | P41182 | DE | B-cell lymphoma 5 protein;                                                                                                                                                                    |
| N | P41182 | DE | B-cell lymphoma 6 protein;                                                                                                                                                                    |
| N | P41182 | DE | Protein LAZ-3;                                                                                                                                                                                |
| N | P41182 | DE | Zinc finger and BTB domain-containing protein 27;                                                                                                                                             |
| N | P41182 | DE | Zinc finger protein 51;                                                                                                                                                                       |
| N | P41182 | DR | chromatin binding                                                                                                                                                                             |
| N | P41182 | DR | negative regulation of B cell apoptosis                                                                                                                                                       |
| N | P41182 | DR | negative regulation of S phase of mitotic cell cycle                                                                                                                                          |
| N | P41182 | DR | negative regulation of cell growth                                                                                                                                                            |
| N | P41182 | DR | negative regulation of transcription from RNA polymerase II promoter                                                                                                                          |
| N | P41182 | DR | positive regulation of apoptosis                                                                                                                                                              |
| N | P41182 | DR | protein binding                                                                                                                                                                               |
| N | P41182 | DR | protein import into nucleus, translocation                                                                                                                                                    |
| N | P41182 | DR | regulation of germinal center formation                                                                                                                                                       |
| N | P41182 | DR | response to DNA damage stimulus                                                                                                                                                               |
| N | P41182 | DR | sequence-specific DNA binding                                                                                                                                                                 |
| N | P41182 | DR | sequence-specific DNA binding transcription factor activity                                                                                                                                   |
| N | P41182 | DR | transcription repressor activity                                                                                                                                                              |
| N | P41182 | DR | zinc ion binding                                                                                                                                                                              |
| N | P41262 | DE | Hemoglobin III;                                                                                                                                                                               |
| N | P41262 | DE | Hemoglobin-3;                                                                                                                                                                                 |
| N | P41262 | DR | oxygen binding                                                                                                                                                                                |
| N | P41262 | DR | oxygen transporter activity                                                                                                                                                                   |
| N | P41345 | CC | May play a key role in regulating the relative amounts of cyclic and non-cyclic electron flow to meet the demands of the plant for ATP and reducing power                                     |

|   |        |    |                                                                                                                                                                       |
|---|--------|----|-----------------------------------------------------------------------------------------------------------------------------------------------------------------------|
| N | P41345 | CC | Is involved in nitrate assimilation.                                                                                                                                  |
| N | P41345 | DE | Ferredoxin--NADP reductase, root isozyme, chloroplastic;                                                                                                              |
| N | P41345 | DR | electron transport chain                                                                                                                                              |
| N | P41345 | DR | ferredoxin-NADP+ reductase activity                                                                                                                                   |
| N | P41345 | DR | flavin adenine dinucleotide binding                                                                                                                                   |
| N | P41345 | DR | photosynthesis                                                                                                                                                        |
| N | P41352 | CC | Tubulin is the major constituent of microtubules                                                                                                                      |
| N | P41352 | CC | It binds two moles of GTP, one at an exchangeable site on the beta chain and one at a non-exchangeable site on the alpha-chain.                                       |
| N | P41352 | DE | Beta-tubulin;                                                                                                                                                         |
| N | P41352 | DE | Tubulin beta chain;                                                                                                                                                   |
| N | P41352 | DR | GTPase activity                                                                                                                                                       |
| N | P41352 | DR | microtubule-based movement                                                                                                                                            |
| N | P41352 | DR | protein polymerization                                                                                                                                                |
| N | P41352 | DR | structural molecule activity                                                                                                                                          |
| N | P41444 | DE | Fibroblast growth factor homolog;                                                                                                                                     |
| N | P41444 | DR | growth factor activity                                                                                                                                                |
| N | P41472 | DE | Uncharacterized 11.5 kDa protein in IAP2-VLF1 intergenic region;                                                                                                      |
| N | P41589 | DE | Melanotropin alpha;                                                                                                                                                   |
| N | P41589 | DR | hormone activity                                                                                                                                                      |
| N | P41767 | CC | Mitochondrial peptide chain release factor that directs the termination of translation in response to the peptide chain termination codons UAA and UAG.               |
| N | P41767 | DE | Peptide chain release factor 1, mitochondrial;                                                                                                                        |
| N | P41767 | DR | translation release factor activity, codon specific                                                                                                                   |
| N | P41863 | DE | CalliFMRFamide-8;                                                                                                                                                     |
| N | P41863 | DR | neuropeptide signaling pathway                                                                                                                                        |
| N | P41935 | DE | Homeobox protein ceh-10;                                                                                                                                              |
| N | P41935 | DR | cell fate specification                                                                                                                                               |
| N | P41935 | DR | neuron migration                                                                                                                                                      |
| N | P41935 | DR | regulation of cell migration                                                                                                                                          |
| N | P41935 | DR | regulation of transcription, DNA-dependent                                                                                                                            |
| N | P41935 | DR | sequence-specific DNA binding                                                                                                                                         |
| N | P41935 | DR | sequence-specific DNA binding transcription factor activity                                                                                                           |
| N | P41935 | DR | tail morphogenesis                                                                                                                                                    |
| N | P41935 | DR | transcription regulator activity                                                                                                                                      |
| N | P42306 | DE | Uncharacterized MFS-type transporter yxiO;                                                                                                                            |
| N | P42369 | CC | participates actively in the response to hyperosmotic and heat shock by preventing the aggregation of stress-denatured proteins, in association with dnaK and grpE    |
| N | P42369 | CC | GrpE releases ADP from dnaK; ATP binding to dnaK triggers the release of the substrate protein, thus completing the reaction cycle                                    |
| N | P42369 | CC | It is the nucleotide exchange factor for dnaK and may function as a thermosensor                                                                                      |
| N | P42369 | CC | Several rounds of ATP- dependent interactions between dnaJ, dnaK and grpE are required for fully efficient folding (By similarity).                                   |
| N | P42369 | CC | Unfolded proteins bind initially to dnaJ; upon interaction with the dnaJ-bound protein, dnaK hydrolyzes its bound ATP, resulting in the formation of a stable complex |
| N | P42369 | DE | HSP-70 cofactor;                                                                                                                                                      |
| N | P42369 | DE | Protein grpE;                                                                                                                                                         |
| N | P42369 | DR | adenyl-nucleotide exchange factor activity                                                                                                                            |
| N | P42369 | DR | chaperone binding                                                                                                                                                     |
| N | P42369 | DR | protein folding                                                                                                                                                       |
| N | P42369 | DR | protein homodimerization activity                                                                                                                                     |
| N | P42369 | DR | response to stress                                                                                                                                                    |
| N | P42516 | CC | Converts p-coumaric acid into p-coumaryl CoA                                                                                                                          |
| N | P42516 | CC | This is necessary for the activation of the photoactive yellow protein (PYP) chromophore.                                                                             |
| N | P42516 | DE | 4-coumarate--CoA ligase;                                                                                                                                              |
| N | P42516 | DE | 4-coumaroyl-CoA synthase;                                                                                                                                             |
| N | P42516 | DR | 4-coumarate-CoA ligase activity                                                                                                                                       |
| N | P42516 | DR | phenylpropanoid metabolic process                                                                                                                                     |
| N | P42675 | CC | Hydrolyzes oligopeptides such as neurotensin, bradykinin and dynorphin A (By similarity).                                                                             |
| N | P42675 | DE | Microsomal endopeptidase;                                                                                                                                             |
| N | P42675 | DE | Mitochondrial oligopeptidase M;                                                                                                                                       |
| N | P42675 | DE | Neurolysin, mitochondrial;                                                                                                                                            |
| N | P42675 | DE | Neurotensin endopeptidase;                                                                                                                                            |

|   |        |    |                                                                                                                                                                                                                                          |
|---|--------|----|------------------------------------------------------------------------------------------------------------------------------------------------------------------------------------------------------------------------------------------|
| N | P42675 | DR | metal ion binding                                                                                                                                                                                                                        |
| N | P42675 | DR | metalloendopeptidase activity                                                                                                                                                                                                            |
| N | P42689 | DE | Tyrosine-protein kinase SRK3;                                                                                                                                                                                                            |
| N | P42689 | DR | non-membrane spanning protein tyrosine kinase activity                                                                                                                                                                                   |
| N | P42689 | DR | protein phosphorylation                                                                                                                                                                                                                  |
| N | P42728 | CC | The actions of the proteins tfxB, tfxD and tfxF are implicated in the processing of the inactive trifolitoxin (tfxA) precursor into the active peptide.                                                                                  |
| N | P42728 | DE | Trifolitoxin-processing protein tfxF;                                                                                                                                                                                                    |
| N | P42783 | CC | may participate in wall plasticization and/or in susceptibility or in cell wall turnover                                                                                                                                                 |
| N | P42783 | DE | Wall-associated proteinase;                                                                                                                                                                                                              |
| N | P42783 | DR | serine-type peptidase activity                                                                                                                                                                                                           |
| N | P42881 | CC | Catalyzes the initial step in the synthesis of dolichol- P-P-oligosaccharides.                                                                                                                                                           |
| N | P42881 | DE | GlcNAc-1-P transferase;                                                                                                                                                                                                                  |
| N | P42881 | DE | N-acetylglucosamine-1-phosphate transferase;                                                                                                                                                                                             |
| N | P42881 | DE | UDP-N-acetylglucosamine--dolichyl-phosphate N-acetylglucosaminophosphotransferase;                                                                                                                                                       |
| N | P42881 | DR | UDP-N-acetylglucosamine-dolichyl-phosphate N-acetylglucosaminophosphotransferase activity                                                                                                                                                |
| N | P42881 | DR | phospho-N-acetylmuramoyl-pentapeptide-transferase activity                                                                                                                                                                               |
| N | P42881 | DR | protein N-linked glycosylation                                                                                                                                                                                                           |
| N | P42881 | DR | transferase activity, transferring glycosyl groups                                                                                                                                                                                       |
| N | P43053 | CC | DNA gyrase negatively supercoils closed circular double- stranded DNA in an ATP-dependent manner and also catalyzes the interconversion of other topological isomers of double-stranded DNA rings, including catenanes and knotted rings |
| N | P43053 | DE | DNA gyrase subunit B;                                                                                                                                                                                                                    |
| N | P43053 | DR | DNA topoisomerase (ATP-hydrolyzing) activity                                                                                                                                                                                             |
| N | P43053 | DR | DNA topological change                                                                                                                                                                                                                   |
| N | P43151 | CC | Guanine nucleotide-binding proteins (G proteins) are involved as modulators or transducers in various transmembrane signaling systems.                                                                                                   |
| N | P43151 | DE | Putative guanine nucleotide-binding protein subunit alpha;                                                                                                                                                                               |
| N | P43151 | DR | G-protein coupled receptor protein signaling pathway                                                                                                                                                                                     |
| N | P43151 | DR | aminoacyl-tRNA ligase activity                                                                                                                                                                                                           |
| N | P43151 | DR | signal transducer activity                                                                                                                                                                                                               |
| N | P43151 | DR | tRNA aminoacylation for protein translation                                                                                                                                                                                              |
| N | P43172 | DE | FMRFamide-like neuropeptide AF9;                                                                                                                                                                                                         |
| N | P43172 | DR | neuropeptide signaling pathway                                                                                                                                                                                                           |
| N | P43462 | CC | Probably involved in the positive regulation of the thc operon for the degradation of the thiocarbamate herbicide EPTC.                                                                                                                  |
| N | P43462 | DE | Probable thc operon regulatory protein;                                                                                                                                                                                                  |
| N | P43462 | DR | regulation of transcription, DNA-dependent                                                                                                                                                                                               |
| N | P43462 | DR | sequence-specific DNA binding                                                                                                                                                                                                            |
| N | P43462 | DR | sequence-specific DNA binding transcription factor activity                                                                                                                                                                              |
| N | P43810 | CC | involved in cell division, probably involved in intracellular septation (By similarity)                                                                                                                                                  |
| N | P43810 | DE | Probable intracellular septation protein;                                                                                                                                                                                                |
| N | P43810 | DR | barrier septum formation                                                                                                                                                                                                                 |
| N | P43852 | DE | AICAR transformylase;                                                                                                                                                                                                                    |
| N | P43852 | DE | Bifunctional purine biosynthesis protein purH;                                                                                                                                                                                           |
| N | P43852 | DE | IMP cyclohydrolase;                                                                                                                                                                                                                      |
| N | P43852 | DE | IMP synthase;                                                                                                                                                                                                                            |
| N | P43852 | DE | Inosinicase;                                                                                                                                                                                                                             |
| N | P43852 | DE | Phosphoribosylaminoimidazolecarboxamide formyltransferase;                                                                                                                                                                               |
| N | P43852 | DR | IMP biosynthetic process                                                                                                                                                                                                                 |
| N | P43852 | DR | IMP cyclohydrolase activity                                                                                                                                                                                                              |
| N | P43852 | DR | phosphoribosylaminoimidazolecarboxamide formyltransferase activity                                                                                                                                                                       |
| N | P43868 | CC | Catalyzes the ferrous insertion into protoporphyrin IX.                                                                                                                                                                                  |
| N | P43868 | DE | Ferrochelataase;                                                                                                                                                                                                                         |
| N | P43868 | DE | Heme synthase;                                                                                                                                                                                                                           |
| N | P43868 | DE | Protoheme ferro-lyase;                                                                                                                                                                                                                   |
| N | P43868 | DR | ferrochelataase activity                                                                                                                                                                                                                 |
| N | P43868 | DR | heme biosynthetic process                                                                                                                                                                                                                |
| N | P43868 | DR | metal ion binding                                                                                                                                                                                                                        |
| N | P44213 | DE | Putative uncharacterized protein HI_1486 in Mu-like prophage FluMu region;                                                                                                                                                               |
| N | P44373 | CC | One of the primary rRNA binding proteins, it binds directly to 16S rRNA where it nucleates assembly of the body of the 30S subunit (By similarity).                                                                                      |
| N | P44373 | DE | 30S ribosomal protein S4;                                                                                                                                                                                                                |
| N | P44373 | DR | structural constituent of ribosome                                                                                                                                                                                                       |



|   |        |    |                                                                                                                                                                                                                                     |
|---|--------|----|-------------------------------------------------------------------------------------------------------------------------------------------------------------------------------------------------------------------------------------|
| N | P44564 | CC | Negative regulator of replication initiation                                                                                                                                                                                        |
| N | P44564 | CC | Could block the allosteric transition of dnaA from an inactive form to an active form (By similarity).                                                                                                                              |
| N | P44564 | CC | Required for sequestration, a process that blocks secondary initiation events                                                                                                                                                       |
| N | P44564 | DE | Protein seqA homolog;                                                                                                                                                                                                               |
| N | P44564 | DR | negative regulation of DNA-dependent DNA replication initiation                                                                                                                                                                     |
| N | P44757 | DE | Uncharacterized HTH-type transcriptional regulator HI_0570;                                                                                                                                                                         |
| N | P44757 | DR | regulation of transcription, DNA-dependent                                                                                                                                                                                          |
| N | P44757 | DR | sequence-specific DNA binding transcription factor activity                                                                                                                                                                         |
| N | P44757 | DR | specific transcriptional repressor activity                                                                                                                                                                                         |
| N | P44940 | DE | Uncharacterized protein HI_0929;                                                                                                                                                                                                    |
| N | P44940 | DR | catalytic activity                                                                                                                                                                                                                  |
| N | P45107 | CC | Involved in acetate metabolism (By similarity).                                                                                                                                                                                     |
| N | P45107 | DE | Phosphate acetyltransferase;                                                                                                                                                                                                        |
| N | P45107 | DE | Phosphotransacetylase;                                                                                                                                                                                                              |
| N | P45107 | DR | phosphate acetyltransferase activity                                                                                                                                                                                                |
| N | P45291 | CC | Formation of pseudouridine at positions 38, 39 and 40 in the anticodon stem and loop of transfer RNAs (By similarity).                                                                                                              |
| N | P45291 | DE | tRNA pseudouridine synthase A;                                                                                                                                                                                                      |
| N | P45291 | DE | tRNA pseudouridylation synthase I;                                                                                                                                                                                                  |
| N | P45291 | DE | tRNA-uridine isomerase I;                                                                                                                                                                                                           |
| N | P45291 | DR | pseudouridine synthase activity                                                                                                                                                                                                     |
| N | P45291 | DR | pseudouridine synthesis                                                                                                                                                                                                             |
| N | P45291 | DR | tRNA processing                                                                                                                                                                                                                     |
| N | P45359 | DE | Acetoacetyl-CoA thiolase;                                                                                                                                                                                                           |
| N | P45359 | DE | Acetyl-CoA acetyltransferase;                                                                                                                                                                                                       |
| N | P45359 | DR | acetyl-CoA C-acetyltransferase activity                                                                                                                                                                                             |
| N | P45480 | DE | GSH synthetase;                                                                                                                                                                                                                     |
| N | P45480 | DE | Glutathione synthase;                                                                                                                                                                                                               |
| N | P45480 | DE | Glutathione synthetase;                                                                                                                                                                                                             |
| N | P45480 | DR | glutathione synthase activity                                                                                                                                                                                                       |
| N | P45480 | DR | metal ion binding                                                                                                                                                                                                                   |
| N | P45522 | CC | Transport system that facilitates potassium-efflux, possibly by potassium-proton antiport                                                                                                                                           |
| N | P45522 | DE | Glutathione-regulated potassium-efflux system protein kefB;                                                                                                                                                                         |
| N | P45522 | DE | K(+)/H(+) antiporter;                                                                                                                                                                                                               |
| N | P45522 | DE | NEM-activable K(+)/H(+) antiporter;                                                                                                                                                                                                 |
| N | P45522 | DR | catalytic activity                                                                                                                                                                                                                  |
| N | P45522 | DR | glutathione-regulated potassium exporter activity                                                                                                                                                                                   |
| N | P45522 | DR | solute:hydrogen antiporter activity                                                                                                                                                                                                 |
| N | P45663 | CC | Beta toxins bind voltage-independently at site-4 of sodium channels and shift the voltage of activation toward more negative potentials thereby affecting sodium channel activation and promoting spontaneous and repetitive firing |
| N | P45663 | CC | At high concentrations, it does displace the (beta) mammal-specific toxin Cn2 from rat brain synaptosomes.                                                                                                                          |
| N | P45663 | CC | This toxin is lethal to crustaceans (freshwater crayfish (Cambarellus montezumae spp.)), it provokes a reversible paralysis to insects (crickets (Achaeta spp.)), but is not toxic to mice                                          |
| N | P45663 | DE | Beta-toxin Cn5;                                                                                                                                                                                                                     |
| N | P45663 | DR | defense response                                                                                                                                                                                                                    |
| N | P45663 | DR | sodium channel inhibitor activity                                                                                                                                                                                                   |
| N | P45822 | CC | Produces ATP from ADP in the presence of a proton gradient across the membrane                                                                                                                                                      |
| N | P45822 | DE | ATP synthase F1 sector epsilon subunit;                                                                                                                                                                                             |
| N | P45822 | DE | ATP synthase epsilon chain;                                                                                                                                                                                                         |
| N | P45822 | DE | F-ATPase epsilon subunit;                                                                                                                                                                                                           |
| N | P45822 | DR | ATP synthesis coupled proton transport                                                                                                                                                                                              |
| N | P45822 | DR | hydrogen ion transporting ATP synthase activity, rotational mechanism                                                                                                                                                               |
| N | P45822 | DR | proton-transporting ATPase activity, rotational mechanism                                                                                                                                                                           |
| N | P45845 | CC | Responsible for the post-translational oxidative deamination of peptidyl lysine residues in precursors to fibrous collagen and elastin.                                                                                             |
| N | P45845 | DE | Lysyl oxidase;                                                                                                                                                                                                                      |
| N | P45845 | DE | Protein-lysine 6-oxidase;                                                                                                                                                                                                           |
| N | P45845 | DR | copper ion binding                                                                                                                                                                                                                  |
| N | P45845 | DR | oxidation-reduction process                                                                                                                                                                                                         |
| N | P45845 | DR | protein-lysine 6-oxidase activity                                                                                                                                                                                                   |
| N | P45919 | DE | Uncharacterized protein yqbC;                                                                                                                                                                                                       |

|   |        |    |                                                                                                                                                                                                                                                                                                                                                                                                     |
|---|--------|----|-----------------------------------------------------------------------------------------------------------------------------------------------------------------------------------------------------------------------------------------------------------------------------------------------------------------------------------------------------------------------------------------------------|
| N | P46024 | DE | 80 kDa D15 antigen;                                                                                                                                                                                                                                                                                                                                                                                 |
| N | P46024 | DE | Outer membrane protein D15;                                                                                                                                                                                                                                                                                                                                                                         |
| N | P46024 | DE | Protective surface antigen D15;                                                                                                                                                                                                                                                                                                                                                                     |
| N | P46079 | DE | Uncharacterized protein alr2393;                                                                                                                                                                                                                                                                                                                                                                    |
| N | P46085 | DE | Hemagglutinin component HA-22A;                                                                                                                                                                                                                                                                                                                                                                     |
| N | P46085 | DE | Hemagglutinin component HA-22B;                                                                                                                                                                                                                                                                                                                                                                     |
| N | P46085 | DE | Hemagglutinin component HA-23A;                                                                                                                                                                                                                                                                                                                                                                     |
| N | P46085 | DE | Hemagglutinin component HA-23B;                                                                                                                                                                                                                                                                                                                                                                     |
| N | P46085 | DE | Hemagglutinin component HA-53;                                                                                                                                                                                                                                                                                                                                                                      |
| N | P46085 | DE | Hemagglutinin components HA-22/23/53;                                                                                                                                                                                                                                                                                                                                                               |
| N | P46325 | DE | Uncharacterized protein yxbA;                                                                                                                                                                                                                                                                                                                                                                       |
| N | P46439 | CC | Conjugation of reduced glutathione to a wide number of exogenous and endogenous hydrophobic electrophiles.                                                                                                                                                                                                                                                                                          |
| N | P46439 | DE | GST class-mu 5;                                                                                                                                                                                                                                                                                                                                                                                     |
| N | P46439 | DE | Glutathione S-transferase Mu 5;                                                                                                                                                                                                                                                                                                                                                                     |
| N | P46439 | DR | glutathione transferase activity                                                                                                                                                                                                                                                                                                                                                                    |
| N | P46439 | DR | xenobiotic metabolic process                                                                                                                                                                                                                                                                                                                                                                        |
| N | P46555 | CC | Converts D-glucuronic acid residues adjacent to N- sulfate sugar residues to L-iduronic acids (By similarity).                                                                                                                                                                                                                                                                                      |
| N | P46555 | DE | D-glucuronyl C5-epimerase;                                                                                                                                                                                                                                                                                                                                                                          |
| N | P46555 | DE | Heparin/heparan sulfate:glucuronic acid C5-epimerase;                                                                                                                                                                                                                                                                                                                                               |
| N | P46555 | DR | glycosaminoglycan biosynthetic process                                                                                                                                                                                                                                                                                                                                                              |
| N | P46555 | DR | positive regulation of growth rate                                                                                                                                                                                                                                                                                                                                                                  |
| N | P46555 | DR | positive regulation of multicellular organism growth                                                                                                                                                                                                                                                                                                                                                |
| N | P46555 | DR | racemase and epimerase activity, acting on carbohydrates and derivatives<br>Activates, in anaerobic conditions, the transcription of the fermentative operons lctEP and alsDS, of the hmp gene encoding a flavohemoglobin-like protein, the nitrite reductase operon nasDE and the heme biosynthesis genes hemN and hem7                                                                            |
| N | P46910 | CC | Anaerobic respiration and fermentation modulator;                                                                                                                                                                                                                                                                                                                                                   |
| N | P46910 | DE | Probable transcription regulator ArfM;                                                                                                                                                                                                                                                                                                                                                              |
| N | P46924 | DE | Probable HTH-type transcriptional regulator leuO;                                                                                                                                                                                                                                                                                                                                                   |
| N | P46924 | DR | regulation of transcription, DNA-dependent                                                                                                                                                                                                                                                                                                                                                          |
| N | P46924 | DR | sequence-specific DNA binding transcription factor activity                                                                                                                                                                                                                                                                                                                                         |
| N | P47019 | CC | With ARX1, involved in proper assembly of pre-ribosomal particles during the biogenesis of the 60S ribosomal subunit                                                                                                                                                                                                                                                                                |
| N | P47019 | CC | Accompanies the pre-60S particles to the cytoplasm.                                                                                                                                                                                                                                                                                                                                                 |
| N | P47019 | DE | Ribosome biogenesis protein ALB1;                                                                                                                                                                                                                                                                                                                                                                   |
| N | P47019 | DR | protein binding                                                                                                                                                                                                                                                                                                                                                                                     |
| N | P47019 | DR | ribosomal large subunit biogenesis                                                                                                                                                                                                                                                                                                                                                                  |
| N | P47313 | DE | Uncharacterized lipoprotein MG067;                                                                                                                                                                                                                                                                                                                                                                  |
| N | P47313 | DR | RNA helicase activity                                                                                                                                                                                                                                                                                                                                                                               |
| N | P47331 | CC | Catalyzes the ATP- as well as the pyrophosphate- dependent phosphorylation of a specific serine residue in HPr, a phosphocarrier protein of the phosphoenolpyruvate-dependent sugar phosphotransferase system (PTS)<br>HprK/P also catalyzes the pyrophosphate-producing, inorganic phosphate-dependent dephosphorylation (phosphorolysis) of seryl-phosphorylated HPr (P-Ser-HPr) (By similarity). |
| N | P47331 | CC | HPr kinase/phosphorylase;                                                                                                                                                                                                                                                                                                                                                                           |
| N | P47331 | DE | HPr(Ser) kinase/phosphorylase;                                                                                                                                                                                                                                                                                                                                                                      |
| N | P47331 | DR | carbohydrate metabolic process                                                                                                                                                                                                                                                                                                                                                                      |
| N | P47331 | DR | metal ion binding                                                                                                                                                                                                                                                                                                                                                                                   |
| N | P47331 | DR | protein serine/threonine kinase activity                                                                                                                                                                                                                                                                                                                                                            |
| N | P47331 | DR | regulation of carbohydrate metabolic process                                                                                                                                                                                                                                                                                                                                                        |
| N | P47331 | DR | two-component sensor activity                                                                                                                                                                                                                                                                                                                                                                       |
| N | P47427 | DE | Uncharacterized protein MG181;                                                                                                                                                                                                                                                                                                                                                                      |
| N | P47427 | DR | cobalamin biosynthetic process                                                                                                                                                                                                                                                                                                                                                                      |
| N | P47427 | DR | cobalt ion transmembrane transporter activity                                                                                                                                                                                                                                                                                                                                                       |
| N | P47479 | DE | Uncharacterized protein MG237;                                                                                                                                                                                                                                                                                                                                                                      |
| N | P47497 | DE | Uncharacterized protein MG255;                                                                                                                                                                                                                                                                                                                                                                      |
| N | P47520 | CC | In eubacteria ppGpp (guanosine 3'-diphosphate 5'-diphosphate) is a mediator of the stringent response that coordinates a variety of cellular activities in response to changes in nutritional abundance                                                                                                                                                                                             |
| N | P47520 | CC | It may also be capable of catalyzing the synthesis of ppGpp (By similarity).                                                                                                                                                                                                                                                                                                                        |
| N | P47520 | CC | This enzyme catalyzes the degradation of ppGpp into GDP                                                                                                                                                                                                                                                                                                                                             |
| N | P47520 | DE | (ppGpp)ase;                                                                                                                                                                                                                                                                                                                                                                                         |

|   |        |    |                                                                                                                                                                                                                                                         |
|---|--------|----|---------------------------------------------------------------------------------------------------------------------------------------------------------------------------------------------------------------------------------------------------------|
| N | P47520 | DE | Penta-phosphate guanosine-3'-pyrophosphohydrolase;                                                                                                                                                                                                      |
| N | P47520 | DE | Probable guanosine-3',5'-bis(diphosphate) 3'-pyrophosphohydrolase;                                                                                                                                                                                      |
| N | P47520 | DR | guanosine tetraphosphate metabolic process                                                                                                                                                                                                              |
| N | P47520 | DR | guanosine-3',5'-bis(diphosphate) 3'-diphosphatase activity                                                                                                                                                                                              |
| N | P47583 | CC | DNA-dependent RNA polymerase catalyzes the transcription of DNA into RNA using the four ribonucleoside triphosphates as substrates.                                                                                                                     |
| N | P47583 | DE | DNA-directed RNA polymerase subunit beta;                                                                                                                                                                                                               |
| N | P47583 | DE | RNA polymerase subunit beta;                                                                                                                                                                                                                            |
| N | P47583 | DE | RNAP subunit beta;                                                                                                                                                                                                                                      |
| N | P47583 | DE | Transcriptase subunit beta;                                                                                                                                                                                                                             |
| N | P47583 | DR | DNA-directed RNA polymerase activity                                                                                                                                                                                                                    |
| N | P47583 | DR | ribonucleoside binding                                                                                                                                                                                                                                  |
| N | P47657 | CC | This protein is one of the early assembly proteins of the 50S ribosomal subunit, although it is not seen to bind rRNA by itself                                                                                                                         |
| N | P47657 | CC | It is important during the early stages of 50S assembly (By similarity).                                                                                                                                                                                |
| N | P47657 | DE | 50S ribosomal protein L13;                                                                                                                                                                                                                              |
| N | P47657 | DR | structural constituent of ribosome                                                                                                                                                                                                                      |
| N | P47662 | DE | Uncharacterized protein MG423;                                                                                                                                                                                                                          |
| N | P47662 | DR | hydrolase activity, acting on ester bonds                                                                                                                                                                                                               |
| N | P47662 | DR | metal ion binding                                                                                                                                                                                                                                       |
| N | P47691 | CC | May play a role in stationary phase survival (By similarity).                                                                                                                                                                                           |
| N | P47691 | DE | Alpha-D-glucosyl-1-phosphate uridylyltransferase;                                                                                                                                                                                                       |
| N | P47691 | DE | UDP-glucose pyrophosphorylase;                                                                                                                                                                                                                          |
| N | P47691 | DE | UTP--glucose-1-phosphate uridylyltransferase;                                                                                                                                                                                                           |
| N | P47691 | DE | Uridine diphosphoglucose pyrophosphorylase;                                                                                                                                                                                                             |
| N | P47691 | DR | UDP-glucose metabolic process                                                                                                                                                                                                                           |
| N | P47691 | DR | UTP:glucose-1-phosphate uridylyltransferase activity                                                                                                                                                                                                    |
| N | P47691 | DR | biosynthetic process                                                                                                                                                                                                                                    |
| N | P47872 | CC | This is a receptor for secretin                                                                                                                                                                                                                         |
| N | P47872 | CC | The activity of this receptor is mediated by G proteins which activate adenylate cyclase.                                                                                                                                                               |
| N | P47872 | DE | Secretin receptor;                                                                                                                                                                                                                                      |
| N | P47872 | DR | secretin receptor activity                                                                                                                                                                                                                              |
| N | P47938 | CC | Participates in various redox reactions through the reversible oxidation of its active center dithiol to a disulfide and catalyzes dithiol-disulfide exchange as a reducing substrate of peroxiredoxin 1, thioredoxin 2 is preferred over thioredoxin 1 |
| N | P47938 | CC | Required for female meiosis and early embryonic development.                                                                                                                                                                                            |
| N | P47938 | DE | Protein deadhead;                                                                                                                                                                                                                                       |
| N | P47938 | DE | Thioredoxin-1;                                                                                                                                                                                                                                          |
| N | P47938 | DR | cell redox homeostasis                                                                                                                                                                                                                                  |
| N | P47938 | DR | electron carrier activity                                                                                                                                                                                                                               |
| N | P47938 | DR | electron transport chain                                                                                                                                                                                                                                |
| N | P47938 | DR | glycerol ether metabolic process                                                                                                                                                                                                                        |
| N | P47938 | DR | protein binding                                                                                                                                                                                                                                         |
| N | P47938 | DR | protein disulfide oxidoreductase activity                                                                                                                                                                                                               |
| N | P47938 | DR | response to DNA damage stimulus                                                                                                                                                                                                                         |
| N | P48032 | CC | Complexes with metalloproteinases (such as collagenases) and irreversibly inactivates them by binding to their catalytic zinc cofactor                                                                                                                  |
| N | P48032 | CC | May form part of a tissue-specific acute response to remodeling stimuli.                                                                                                                                                                                |
| N | P48032 | DE | Metalloproteinase inhibitor 3;                                                                                                                                                                                                                          |
| N | P48032 | DE | Tissue inhibitor of metalloproteinases 3;                                                                                                                                                                                                               |
| N | P48032 | DR | central nervous system development                                                                                                                                                                                                                      |
| N | P48032 | DR | induction of apoptosis                                                                                                                                                                                                                                  |
| N | P48032 | DR | metal ion binding                                                                                                                                                                                                                                       |
| N | P48032 | DR | metalloendopeptidase inhibitor activity                                                                                                                                                                                                                 |
| N | P48032 | DR | response to amino acid stimulus                                                                                                                                                                                                                         |
| N | P48032 | DR | response to estrogen stimulus                                                                                                                                                                                                                           |
| N | P48032 | DR | response to folic acid                                                                                                                                                                                                                                  |
| N | P48032 | DR | response to mechanical stimulus                                                                                                                                                                                                                         |
| N | P48032 | DR | response to organic cyclic compound                                                                                                                                                                                                                     |
| N | P48032 | DR | tissue regeneration                                                                                                                                                                                                                                     |
| N | P48159 | DE | 60S ribosomal protein L23;                                                                                                                                                                                                                              |
| N | P48159 | DR | mitotic spindle elongation                                                                                                                                                                                                                              |
| N | P48159 | DR | protein binding                                                                                                                                                                                                                                         |
| N | P48159 | DR | structural constituent of ribosome                                                                                                                                                                                                                      |
| N | P48324 | DE | Uncharacterized 24.3 kDa protein in psbH-rpl11 intergenic region;                                                                                                                                                                                       |

|   |        |    |                                                                                                                                          |
|---|--------|----|------------------------------------------------------------------------------------------------------------------------------------------|
| N | P48374 | CC | Topoisomerase IV is essential for chromosome segregation                                                                                 |
| N | P48374 | CC | It relaxes supercoiled DNA                                                                                                               |
| N | P48374 | CC | Performs the decatenation events required during the replication of a circular DNA molecule (By similarity).                             |
| N | P48374 | DE | DNA topoisomerase 4 subunit A;                                                                                                           |
| N | P48374 | DE | Topoisomerase IV subunit A;                                                                                                              |
| N | P48374 | DR | DNA topoisomerase (ATP-hydrolyzing) activity                                                                                             |
| N | P48374 | DR | DNA topological change                                                                                                                   |
| N | P48374 | DR | regulation of transcription, DNA-dependent                                                                                               |
| N | P48374 | DR | sequence-specific DNA binding transcription factor activity                                                                              |
| N | P48453 | CC | Calcium-dependent, calmodulin-stimulated protein phosphatase                                                                             |
| N | P48453 | CC | This subunit may have a role in the calmodulin activation of calcineurin.                                                                |
| N | P48453 | DE | CAM-PRP catalytic subunit;                                                                                                               |
| N | P48453 | DE | Calmodulin-dependent calcineurin A subunit beta isoform;                                                                                 |
| N | P48453 | DE | Serine/threonine-protein phosphatase 2B catalytic subunit beta isoform;                                                                  |
| N | P48453 | DR | T cell differentiation                                                                                                                   |
| N | P48453 | DR | T cell homeostasis                                                                                                                       |
| N | P48453 | DR | calmodulin binding                                                                                                                       |
| N | P48453 | DR | heart development                                                                                                                        |
| N | P48453 | DR | metal ion binding                                                                                                                        |
| N | P48453 | DR | negative regulation of T cell mediated cytotoxicity                                                                                      |
| N | P48453 | DR | protein dephosphorylation                                                                                                                |
| N | P48453 | DR | protein serine/threonine phosphatase activity                                                                                            |
| N | P48453 | DR | regulation of gene expression                                                                                                            |
| N | P48453 | DR | response to cytokine stimulus                                                                                                            |
| N | P48556 | CC | Acts as a regulatory subunit of the 26S proteasome which is involved in the ATP-dependent degradation of ubiquitinated proteins          |
| N | P48556 | CC | Necessary for activation of the CDC28 kinase.                                                                                            |
| N | P48556 | DE | 26S proteasome non-ATPase regulatory subunit 8;                                                                                          |
| N | P48556 | DE | 26S proteasome regulatory subunit RPN12;                                                                                                 |
| N | P48556 | DE | 26S proteasome regulatory subunit S14;                                                                                                   |
| N | P48556 | DR | DNA damage response, signal transduction by p53 class mediator resulting in cell cycle arrest                                            |
| N | P48556 | DR | G1/S transition of mitotic cell cycle                                                                                                    |
| N | P48556 | DR | M/G1 transition of mitotic cell cycle                                                                                                    |
| N | P48556 | DR | S phase of mitotic cell cycle                                                                                                            |
| N | P48556 | DR | anaphase-promoting complex-dependent proteasomal ubiquitin-dependent protein catabolic process                                           |
| N | P48556 | DR | mRNA metabolic process                                                                                                                   |
| N | P48556 | DR | negative regulation of ubiquitin-protein ligase activity involved in mitotic cell cycle                                                  |
| N | P48556 | DR | positive regulation of ubiquitin-protein ligase activity involved in mitotic cell cycle                                                  |
| N | P48556 | DR | protein binding                                                                                                                          |
| N | P48556 | DR | regulation of apoptosis                                                                                                                  |
| N | P48556 | DR | regulation of cellular amino acid metabolic process                                                                                      |
| N | P48556 | DR | viral reproduction                                                                                                                       |
| N | P48573 | CC | Catalyzes the isomerization between 2-isopropylmalate and 3-isopropylmalate, via the formation of 2-isopropylmaleate.                    |
| N | P48573 | DE | 3-isopropylmalate dehydratase large subunit;                                                                                             |
| N | P48573 | DE | Alpha-IPM isomerase;                                                                                                                     |
| N | P48573 | DE | Isopropylmalate isomerase;                                                                                                               |
| N | P48573 | DR | 3-isopropylmalate dehydratase activity                                                                                                   |
| N | P48573 | DR | 4 iron, 4 sulfur cluster binding                                                                                                         |
| N | P48573 | DR | leucine biosynthetic process                                                                                                             |
| N | P48573 | DR | metal ion binding                                                                                                                        |
| N | P48763 | CC | Involved in pH regulation to eliminate acids generated by active metabolism or to counter adverse environmental conditions               |
| N | P48763 | CC | major proton extruding system driven by the inward sodium ion chemical gradient                                                          |
| N | P48763 | CC | Seems to play an important role in colonic sodium absorption.                                                                            |
| N | P48763 | DE | Na(+)/H(+) exchanger 2;                                                                                                                  |
| N | P48763 | DE | Sodium/hydrogen exchanger 2;                                                                                                             |
| N | P48763 | DE | Solute carrier family 9 member 2;                                                                                                        |
| N | P48763 | DR | sodium:hydrogen antiporter activity                                                                                                      |
| N | P48988 | CC | Interacts with centromeric heterochromatin in chromosomes and binds to a specific subset of alphoid satellite DNA, called the CENP-B box |

|   |        |    |                                                                                                                                                                                                                                                                          |
|---|--------|----|--------------------------------------------------------------------------------------------------------------------------------------------------------------------------------------------------------------------------------------------------------------------------|
| N | P48988 | CC | May organize arrays of centromere satellite DNA into a higher order structure which then directs centromere formation and kinetochore assembly in mammalian chromosomes (By similarity).                                                                                 |
| N | P48988 | DE | Centromere protein B;                                                                                                                                                                                                                                                    |
| N | P48988 | DE | Major centromere autoantigen B;                                                                                                                                                                                                                                          |
| N | P48988 | DR | chromatin binding                                                                                                                                                                                                                                                        |
| N | P49290 | CC | Mediates tyrosine nitration of secondary granule proteins in mature resting eosinophils (By similarity).                                                                                                                                                                 |
| N | P49290 | DE | Eosinophil peroxidase heavy chain;                                                                                                                                                                                                                                       |
| N | P49290 | DE | Eosinophil peroxidase light chain;                                                                                                                                                                                                                                       |
| N | P49290 | DE | Eosinophil peroxidase;                                                                                                                                                                                                                                                   |
| N | P49290 | DR | hydrogen peroxide catabolic process                                                                                                                                                                                                                                      |
| N | P49290 | DR | oxidation-reduction process                                                                                                                                                                                                                                              |
| N | P49290 | DR | peroxidase activity                                                                                                                                                                                                                                                      |
| N | P49599 | DE | Protein phosphatase 2C 57;                                                                                                                                                                                                                                               |
| N | P49599 | DE | Protein phosphatase 2C PPH1;                                                                                                                                                                                                                                             |
| N | P49599 | DR | metal ion binding                                                                                                                                                                                                                                                        |
| N | P49599 | DR | photosynthetic electron transport chain                                                                                                                                                                                                                                  |
| N | P49599 | DR | photosystem stoichiometry adjustment                                                                                                                                                                                                                                     |
| N | P49599 | DR | protein dephosphorylation                                                                                                                                                                                                                                                |
| N | P49599 | DR | protein serine/threonine phosphatase activity                                                                                                                                                                                                                            |
| N | P49626 | CC | Participates in the regulation of the accumulation of its own mRNA.                                                                                                                                                                                                      |
| N | P49626 | DE | 60S ribosomal protein L4-B;                                                                                                                                                                                                                                              |
| N | P49626 | DR | structural constituent of ribosome                                                                                                                                                                                                                                       |
| N | P49653 | CC | Binding of this ligand-gated ion channel to ATP mediates synaptic transmission between neurons and from neurons to smooth muscle.                                                                                                                                        |
| N | P49653 | DE | ATP receptor;                                                                                                                                                                                                                                                            |
| N | P49653 | DE | P2X purinoceptor 2;                                                                                                                                                                                                                                                      |
| N | P49653 | DE | Purinergic receptor;                                                                                                                                                                                                                                                     |
| N | P49653 | DR | cadmium ion binding                                                                                                                                                                                                                                                      |
| N | P49653 | DR | cobalt ion binding                                                                                                                                                                                                                                                       |
| N | P49653 | DR | copper ion binding                                                                                                                                                                                                                                                       |
| N | P49653 | DR | extracellular ATP-gated cation channel activity                                                                                                                                                                                                                          |
| N | P49653 | DR | identical protein binding                                                                                                                                                                                                                                                |
| N | P49653 | DR | mercury ion binding                                                                                                                                                                                                                                                      |
| N | P49653 | DR | nickel ion binding                                                                                                                                                                                                                                                       |
| N | P49653 | DR | phosphatidylinositol binding                                                                                                                                                                                                                                             |
| N | P49653 | DR | protein heterooligomerization                                                                                                                                                                                                                                            |
| N | P49653 | DR | protein homooligomerization                                                                                                                                                                                                                                              |
| N | P49653 | DR | receptor activity                                                                                                                                                                                                                                                        |
| N | P49653 | DR | regulation of action potential in neuron                                                                                                                                                                                                                                 |
| N | P49653 | DR | zinc ion binding                                                                                                                                                                                                                                                         |
| N | P49807 | CC | Inhibits signal transduction by increasing the GTPase activity of G protein alpha subunits thereby driving them into their inactive GDP-bound form.                                                                                                                      |
| N | P49807 | DE | Regulator of G-protein signaling 11;                                                                                                                                                                                                                                     |
| N | P49807 | DR | GTPase activator activity                                                                                                                                                                                                                                                |
| N | P49807 | DR | negative regulation of signal transduction                                                                                                                                                                                                                               |
| N | P49807 | DR | regulation of G-protein coupled receptor protein signaling pathway                                                                                                                                                                                                       |
| N | P49807 | DR | signal transducer activity                                                                                                                                                                                                                                               |
| N | P49851 | DE | Uncharacterized acyl-CoA thioester hydrolase YkhA;                                                                                                                                                                                                                       |
| N | P49851 | DR | hydrolase activity                                                                                                                                                                                                                                                       |
| N | P49875 | CC | Granulocyte/macrophage colony-stimulating factors are cytokines that act in hematopoiesis by controlling the production, differentiation, and function of 2 related white cell populations of the blood, the granulocytes and the monocytes-macrophages (By similarity). |
| N | P49875 | DE | Hematopoietic growth factor;                                                                                                                                                                                                                                             |
| N | P49875 | DE | Interleukin-3;                                                                                                                                                                                                                                                           |
| N | P49875 | DE | Mast cell growth factor;                                                                                                                                                                                                                                                 |
| N | P49875 | DE | Multipotential colony-stimulating factor;                                                                                                                                                                                                                                |
| N | P49875 | DE | P-cell-stimulating factor;                                                                                                                                                                                                                                               |
| N | P49875 | DR | cytokine activity                                                                                                                                                                                                                                                        |
| N | P49875 | DR | growth factor activity                                                                                                                                                                                                                                                   |
| N | P49875 | DR | immune response                                                                                                                                                                                                                                                          |
| N | P49875 | DR | interleukin-3 receptor binding                                                                                                                                                                                                                                           |
| N | P49875 | DR | positive regulation of cell proliferation                                                                                                                                                                                                                                |

|   |        |    |                                                                                                                                                                           |
|---|--------|----|---------------------------------------------------------------------------------------------------------------------------------------------------------------------------|
| N | P49875 | DR | positive regulation of survival gene product expression                                                                                                                   |
| N | P50167 | DE | D-arabinitol 2-dehydrogenase [ribulose-forming];                                                                                                                          |
| N | P50167 | DR | D-arabinitol 2-dehydrogenase activity                                                                                                                                     |
| N | P50167 | DR | carbohydrate metabolic process                                                                                                                                            |
| N | P50167 | DR | oxidation-reduction process                                                                                                                                               |
| N | P50212 | CC | Binds to one of the cis-acting domain of the insulin gene enhancer                                                                                                        |
| N | P50212 | CC | May be involved in subtype specialization of primary motoneurons.                                                                                                         |
| N | P50212 | DE | Insulin gene enhancer protein ISL-2B;                                                                                                                                     |
| N | P50212 | DR | multicellular organismal development                                                                                                                                      |
| N | P50212 | DR | regulation of transcription, DNA-dependent                                                                                                                                |
| N | P50212 | DR | sequence-specific DNA binding                                                                                                                                             |
| N | P50212 | DR | sequence-specific DNA binding transcription factor activity                                                                                                               |
| N | P50212 | DR | transcription regulator activity                                                                                                                                          |
| N | P50212 | DR | zinc ion binding                                                                                                                                                          |
| N | P50433 | CC | Interconversion of serine and glycine.                                                                                                                                    |
| N | P50433 | DE | Glycine hydroxymethyltransferase;                                                                                                                                         |
| N | P50433 | DE | Serine hydroxymethyltransferase, mitochondrial;                                                                                                                           |
| N | P50433 | DE | Serine methylase;                                                                                                                                                         |
| N | P50433 | DR | L-serine metabolic process                                                                                                                                                |
| N | P50433 | DR | glycine hydroxymethyltransferase activity                                                                                                                                 |
| N | P50433 | DR | glycine metabolic process                                                                                                                                                 |
| N | P50433 | DR | one-carbon metabolic process                                                                                                                                              |
| N | P50433 | DR | pyridoxal phosphate binding                                                                                                                                               |
| N | P50481 | CC | Binds to and activates the promoter of the alpha- glycoprotein gene, and synergistically enhances transcription from the prolactin promoter in cooperation with Dlx 1     |
| N | P50481 | DE | Homeobox protein LIM-3;                                                                                                                                                   |
| N | P50481 | DE | Homeobox protein P-LIM;                                                                                                                                                   |
| N | P50481 | DE | LIM homeobox protein 3;                                                                                                                                                   |
| N | P50481 | DE | LIM/homeobox protein Lhx3;                                                                                                                                                |
| N | P50481 | DR | dorsal/ventral pattern formation                                                                                                                                          |
| N | P50481 | DR | medial motor column neuron differentiation                                                                                                                                |
| N | P50481 | DR | motor axon guidance                                                                                                                                                       |
| N | P50481 | DR | negative regulation of apoptosis                                                                                                                                          |
| N | P50481 | DR | pituitary gland development                                                                                                                                               |
| N | P50481 | DR | positive regulation of transcription from RNA polymerase II promoter                                                                                                      |
| N | P50481 | DR | protein binding                                                                                                                                                           |
| N | P50481 | DR | protein binding transcription factor activity                                                                                                                             |
| N | P50481 | DR | sequence-specific DNA binding                                                                                                                                             |
| N | P50481 | DR | sequence-specific DNA binding transcription factor activity                                                                                                               |
| N | P50481 | DR | transcription regulator activity                                                                                                                                          |
| N | P50481 | DR | zinc ion binding                                                                                                                                                          |
| N | P50558 | CC | This is 1 of the proteins that binds and probably mediates the attachment of the 5S RNA into the large ribosomal subunit, where it forms part of the central protuberance |
| N | P50558 | CC | In the 70S ribosome it contacts protein S13 of the 30S subunit (bridge B1b), connecting the 2 subunits; this bridge is implicated in subunit movement                     |
| N | P50558 | CC | May contact the P site tRNA; the 5S rRNA and some of its associated proteins might help stabilize positioning of ribosome-bound tRNAs (By similarity).                    |
| N | P50558 | DE | 50S ribosomal protein L5P;                                                                                                                                                |
| N | P50558 | DR | structural constituent of ribosome                                                                                                                                        |
| N | P50583 | CC | Asymmetrically hydrolyzes Ap4A to yield AMP and ATP                                                                                                                       |
| N | P50583 | CC | Plays a major role in maintaining homeostasis.                                                                                                                            |
| N | P50583 | DE | Ap4A hydrolase;                                                                                                                                                           |
| N | P50583 | DE | Bis(5'-nucleosyl)-tetraphosphatase [asymmetrical];                                                                                                                        |
| N | P50583 | DE | Diadenosine 5',5'''-P1,P4-tetraphosphate asymmetrical hydrolase;                                                                                                          |
| N | P50583 | DE | Diadenosine tetraphosphatase;                                                                                                                                             |
| N | P50583 | DE | Nucleoside diphosphate-linked moiety X motif 2;                                                                                                                           |
| N | P50583 | DE | Nudix motif 2;                                                                                                                                                            |
| N | P50583 | DR | bis(5'-nucleosyl)-tetraphosphatase (asymmetrical) activity                                                                                                                |
| N | P50583 | DR | bis(5'-nucleosyl)-tetraphosphatase (symmetrical) activity                                                                                                                 |
| N | P50583 | DR | induction of apoptosis                                                                                                                                                    |
| N | P50583 | DR | nucleobase, nucleoside, nucleotide and nucleic acid metabolic process                                                                                                     |
| N | P50779 | CC | E7 protein has both transforming and trans-activating activities                                                                                                          |
| N | P50779 | CC | Disrupts the function of host retinoblastoma protein RB1/pRb, which is a key regulator of the cell cycle                                                                  |

|   |        |    |                                                                                                                                                                                                                                                        |
|---|--------|----|--------------------------------------------------------------------------------------------------------------------------------------------------------------------------------------------------------------------------------------------------------|
| N | P50779 | CC | inactivation of the ability of RB1 to arrest the cell cycle is critical for cellular transformation, uncontrolled cellular growth and proliferation induced by viral infection                                                                         |
| N | P50779 | CC | Induces the disassembly of the E2F1 transcription factors from RB1, with subsequent transcriptional activation of E2F1-regulated S-phase genes                                                                                                         |
| N | P50779 | CC | Interferes with histone deacetylation mediated by HDAC1 and HDAC2, leading to activation of transcription (By similarity).                                                                                                                             |
| N | P50779 | CC | Stimulation of progression from G1 to S phase allows the virus to efficiently use the cellular DNA replicating machinery to achieve viral genome replication                                                                                           |
| N | P50779 | DR | interspecies interaction between organisms                                                                                                                                                                                                             |
| N | P50779 | DR | metal ion binding                                                                                                                                                                                                                                      |
| N | P50779 | DR | regulation of transcription, DNA-dependent                                                                                                                                                                                                             |
| N | P50779 | DR | sequence-specific DNA binding transcription factor activity                                                                                                                                                                                            |
| N | P51083 | CC | The primary product of this enzyme is 4,2',4',6'- tetrahydroxychalcone (also termed naringenin-chalcone or chalcone) which can under specific conditions spontaneously isomerize into naringenin.                                                      |
| N | P51083 | DE | Chalcone synthase 1;                                                                                                                                                                                                                                   |
| N | P51083 | DE | Naringenin-chalcone synthase 1;                                                                                                                                                                                                                        |
| N | P51083 | DR | acyltransferase activity                                                                                                                                                                                                                               |
| N | P51083 | DR | flavonoid biosynthetic process                                                                                                                                                                                                                         |
| N | P51083 | DR | naringenin-chalcone synthase activity                                                                                                                                                                                                                  |
| N | P51191 | DE | Uncharacterized protein ycf37;                                                                                                                                                                                                                         |
| N | P51251 | CC | DNA-dependent RNA polymerase catalyzes the transcription of DNA into RNA using the four ribonucleoside triphosphates as substrates.                                                                                                                    |
| N | P51251 | DE | DNA-directed RNA polymerase subunit beta';                                                                                                                                                                                                             |
| N | P51251 | DE | Plastid-encoded RNA polymerase subunit beta';                                                                                                                                                                                                          |
| N | P51251 | DE | RNA polymerase subunit beta';                                                                                                                                                                                                                          |
| N | P51251 | DR | DNA-directed RNA polymerase activity                                                                                                                                                                                                                   |
| N | P51325 | DE | Photosystem II 10 kDa phosphoprotein;                                                                                                                                                                                                                  |
| N | P51325 | DE | Photosystem II reaction center protein H;                                                                                                                                                                                                              |
| N | P51325 | DR | phosphate binding                                                                                                                                                                                                                                      |
| N | P51325 | DR | photosynthesis                                                                                                                                                                                                                                         |
| N | P51325 | DR | protein stabilization                                                                                                                                                                                                                                  |
| N | P51367 | CC | Light-harvesting photosynthetic bile pigment-protein from the phycobiliprotein complex (By similarity).                                                                                                                                                |
| N | P51367 | DE | R-phycoerythrin beta chain;                                                                                                                                                                                                                            |
| N | P51367 | DR | electron transport chain                                                                                                                                                                                                                               |
| N | P51367 | DR | photosynthesis                                                                                                                                                                                                                                         |
| N | P51367 | DR | protein-chromophore linkage                                                                                                                                                                                                                            |
| N | P51413 | DE | 60S ribosomal protein L17-2;                                                                                                                                                                                                                           |
| N | P51413 | DR | structural constituent of ribosome                                                                                                                                                                                                                     |
| N | P51489 | CC | Photoreceptor required for image-forming vision at low light intensity<br>Light-induced isomerization of 11-cis to all-trans retinal triggers a conformational change leading to G-protein activation and release of all-trans retinal (By similarity) |
| N | P51489 | CC | Required for photoreceptor cell viability after birth                                                                                                                                                                                                  |
| N | P51489 | DR | G-protein coupled receptor activity                                                                                                                                                                                                                    |
| N | P51489 | DR | metal ion binding                                                                                                                                                                                                                                      |
| N | P51489 | DR | photoreceptor activity                                                                                                                                                                                                                                 |
| N | P51489 | DR | protein-chromophore linkage                                                                                                                                                                                                                            |
| N | P51489 | DR | rhodopsin mediated phototransduction                                                                                                                                                                                                                   |
| N | P51512 | CC | Endopeptidase that degrades various components of the extracellular matrix, such as collagen type III and fibronectin                                                                                                                                  |
| N | P51512 | CC | Activates progelatinase A                                                                                                                                                                                                                              |
| N | P51512 | CC | However, upon interaction with CSPG4, it may be involved in degradation and invasion of type I collagen by melanoma cells.                                                                                                                             |
| N | P51512 | CC | Involved in the matrix remodeling of blood vessels                                                                                                                                                                                                     |
| N | P51512 | CC | Isoform short cleaves fibronectin and also collagen type III, but at lower rate                                                                                                                                                                        |
| N | P51512 | CC | It has no effect on type I, II, IV and V collagen                                                                                                                                                                                                      |
| N | P51512 | DE | Matrix metalloproteinase-16;                                                                                                                                                                                                                           |
| N | P51512 | DE | Membrane-type matrix metalloproteinase 3;                                                                                                                                                                                                              |
| N | P51512 | DE | Membrane-type-3 matrix metalloproteinase;                                                                                                                                                                                                              |
| N | P51512 | DR | calcium ion binding                                                                                                                                                                                                                                    |
| N | P51512 | DR | collagen catabolic process                                                                                                                                                                                                                             |
| N | P51512 | DR | enzyme activator activity                                                                                                                                                                                                                              |
| N | P51512 | DR | metalloendopeptidase activity                                                                                                                                                                                                                          |
| N | P51512 | DR | zinc ion binding                                                                                                                                                                                                                                       |

|   |        |    |                                                                                                                                                                                                                                                                                                                    |
|---|--------|----|--------------------------------------------------------------------------------------------------------------------------------------------------------------------------------------------------------------------------------------------------------------------------------------------------------------------|
| N | P52242 | DR | serine-type endopeptidase inhibitor activity                                                                                                                                                                                                                                                                       |
| N | P52328 | CC | Sigma factors are initiation factors that promote the attachment of RNA polymerase to specific initiation sites and are then released                                                                                                                                                                              |
| N | P52328 | CC | This is the primary sigma factor of this bacterium (By similarity).                                                                                                                                                                                                                                                |
| N | P52328 | DE | RNA polymerase sigma factor rpoD;                                                                                                                                                                                                                                                                                  |
| N | P52328 | DR | regulation of transcription, DNA-dependent                                                                                                                                                                                                                                                                         |
| N | P52328 | DR | sequence-specific DNA binding transcription factor activity                                                                                                                                                                                                                                                        |
| N | P52328 | DR | sigma factor activity                                                                                                                                                                                                                                                                                              |
| N | P52328 | DR | transcription initiation, DNA-dependent                                                                                                                                                                                                                                                                            |
| N | P52328 | DR | transcription regulator activity                                                                                                                                                                                                                                                                                   |
| N | P52347 | CC | Major protein of the icosahedral capsid.                                                                                                                                                                                                                                                                           |
| N | P52347 | DE | Major capsid protein;                                                                                                                                                                                                                                                                                              |
| N | P52347 | DR | structural molecule activity                                                                                                                                                                                                                                                                                       |
| N | P52518 | DE | Uncharacterized protein U55B;                                                                                                                                                                                                                                                                                      |
| N | P52665 | CC | Regulator of the budABC operon for 2,3-butanediol synthesis (By similarity).                                                                                                                                                                                                                                       |
| N | P52665 | DE | Bud operon transcriptional regulator;                                                                                                                                                                                                                                                                              |
| N | P52665 | DE | HTH-type transcriptional regulator BudR;                                                                                                                                                                                                                                                                           |
| N | P52665 | DR | regulation of transcription, DNA-dependent                                                                                                                                                                                                                                                                         |
| N | P52665 | DR | sequence-specific DNA binding transcription factor activity                                                                                                                                                                                                                                                        |
| N | P53070 | CC | Involved in the 5-carboxymethylaminomethyl modification (mnm(5)s(2)U34) of the wobble uridine base in mitochondrial tRNAs.                                                                                                                                                                                         |
| N | P53070 | DE | Mitochondrial translation optimization protein 1;                                                                                                                                                                                                                                                                  |
| N | P53070 | DR | flavin adenine dinucleotide binding                                                                                                                                                                                                                                                                                |
| N | P53070 | DR | identical protein binding                                                                                                                                                                                                                                                                                          |
| N | P53070 | DR | mitochondrial tRNA wobble uridine modification                                                                                                                                                                                                                                                                     |
| N | P53093 | CC | May be involved in proper membrane localization of Rab GTPases.                                                                                                                                                                                                                                                    |
| N | P53093 | DE | Protein YIP4;                                                                                                                                                                                                                                                                                                      |
| N | P53093 | DE | YPT-interacting protein 4;                                                                                                                                                                                                                                                                                         |
| N | P53093 | DR | Rab GTPase binding                                                                                                                                                                                                                                                                                                 |
| N | P53093 | DR | identical protein binding                                                                                                                                                                                                                                                                                          |
| N | P53210 | DE | Uncharacterized protein YGR017W;                                                                                                                                                                                                                                                                                   |
| N | P53238 | CC | Required for polar bud growth and cell wall abscission.                                                                                                                                                                                                                                                            |
| N | P53238 | DE | Penta-EF hand domain-containing protein 1;                                                                                                                                                                                                                                                                         |
| N | P53238 | DR | axial cellular bud site selection                                                                                                                                                                                                                                                                                  |
| N | P53238 | DR | bipolar cellular bud site selection                                                                                                                                                                                                                                                                                |
| N | P53238 | DR | calcium ion binding                                                                                                                                                                                                                                                                                                |
| N | P53238 | DR | identical protein binding                                                                                                                                                                                                                                                                                          |
| N | P53238 | DR | zinc ion binding                                                                                                                                                                                                                                                                                                   |
| N | P53269 | DE | Putative uncharacterized protein YGR115C;                                                                                                                                                                                                                                                                          |
| N | P53277 | CC | Involved in pre-mRNA splicing and cell cycle control<br>As a component of the N1C complex (or PRP19-associated complex), associates to the spliceosome to mediate conformational rearrangement or to stabilize the structure of the spliceosome after U4 snRNA dissociation, which leads to spliceosome maturation |
| N | P53277 | CC | The cell cycle arrest of SYF2 defective cells may be due to the inefficient splicing of TUB1.                                                                                                                                                                                                                      |
| N | P53277 | DE | PRP19 complex protein 31;                                                                                                                                                                                                                                                                                          |
| N | P53277 | DE | Pre-mRNA-splicing factor SYF2;                                                                                                                                                                                                                                                                                     |
| N | P53277 | DE | Synthetic lethal with CDC40 protein 2;                                                                                                                                                                                                                                                                             |
| N | P53277 | DR | nuclear mRNA splicing, via spliceosome                                                                                                                                                                                                                                                                             |
| N | P53277 | DR | protein binding                                                                                                                                                                                                                                                                                                    |
| N | P53625 | CC | Involved in the maturation of Asn-linked oligosaccharides                                                                                                                                                                                                                                                          |
| N | P53625 | CC | Progressively trim alpha-1,2-linked mannose residues from Man(9)GlcNAc(2) to produce Man(5)GlcNAc(2).                                                                                                                                                                                                              |
| N | P53625 | DE | Man(9)-alpha-mannosidase;                                                                                                                                                                                                                                                                                          |
| N | P53625 | DE | Mannosidase-1;                                                                                                                                                                                                                                                                                                     |
| N | P53625 | DE | Mannosyl-oligosaccharide alpha-1,2-mannosidase isoform B;                                                                                                                                                                                                                                                          |
| N | P53625 | DR | calcium ion binding                                                                                                                                                                                                                                                                                                |
| N | P53625 | DR | determination of adult lifespan                                                                                                                                                                                                                                                                                    |
| N | P53625 | DR | mannosyl-oligosaccharide 1,2-alpha-mannosidase activity                                                                                                                                                                                                                                                            |
| N | P53625 | DR | response to anesthetic                                                                                                                                                                                                                                                                                             |
| N | P53685 | CC | NAD-dependent histone deacetylase involved in telomeric silencing                                                                                                                                                                                                                                                  |
| N | P53685 | CC | Acts as a sensor of NAD(+) levels and regulator of NAD(+) biosynthesis                                                                                                                                                                                                                                             |
| N | P53685 | CC | Histone deacetylase proteins act via the formation of large multiprotein complexes that are responsible for the deacetylation of lysine residues on the N-terminal part of the core histones (H2A, H2B, H3 and H4)                                                                                                 |



|   |        |    |                                                                                                                                                                                                                                       |
|---|--------|----|---------------------------------------------------------------------------------------------------------------------------------------------------------------------------------------------------------------------------------------|
| N | P53685 | CC | Histone deacetylation gives a tag for epigenetic repression and plays an important role in transcriptional regulation, cell cycle progression and developmental events                                                                |
| N | P53685 | CC | Regulates the gene expression of de novo NAD(+) biosynthesis genes.                                                                                                                                                                   |
| N | P53685 | CC | Required to repress middle sporulation genes during vegetative growth                                                                                                                                                                 |
| N | P53685 | CC | Restores silencing at HMR in SIR2 mutants when overexpressed                                                                                                                                                                          |
| N | P53685 | DE | Homologous to SIR2 protein 1;                                                                                                                                                                                                         |
| N | P53685 | DE | NAD-dependent deacetylase HST1;                                                                                                                                                                                                       |
| N | P53685 | DR | NAD-dependent histone deacetylase activity                                                                                                                                                                                            |
| N | P53685 | DR | NAD-independent histone deacetylase activity                                                                                                                                                                                          |
| N | P53685 | DR | chromatin silencing                                                                                                                                                                                                                   |
| N | P53685 | DR | histone deacetylation                                                                                                                                                                                                                 |
| N | P53685 | DR | negative regulation of mitotic recombination                                                                                                                                                                                          |
| N | P53685 | DR | protein binding                                                                                                                                                                                                                       |
| N | P53685 | DR | sporulation resulting in formation of a cellular spore                                                                                                                                                                                |
| N | P53685 | DR | zinc ion binding                                                                                                                                                                                                                      |
| N | P53735 | DE | Protein ZRG17;                                                                                                                                                                                                                        |
| N | P53735 | DE | Zinc-regulated gene 17 protein;                                                                                                                                                                                                       |
| N | P53735 | DR | protein binding                                                                                                                                                                                                                       |
| N | P53735 | DR | zinc ion transmembrane transporter activity                                                                                                                                                                                           |
| N | P53817 | CC | Tumor suppressor that may be involved in interferon- dependent cell death                                                                                                                                                             |
| N | P53817 | CC | Also has weak lysophospholipase activity (By similarity).                                                                                                                                                                             |
| N | P53817 | CC | Specifically catalyzes the release of fatty acids from phospholipids in adipose tissue.                                                                                                                                               |
| N | P53817 | DE | Group XVI phospholipase A2;                                                                                                                                                                                                           |
| N | P53817 | DE | H-rev 107 protein;                                                                                                                                                                                                                    |
| N | P53817 | DE | HRAS-like suppressor 3;                                                                                                                                                                                                               |
| N | P53817 | DR | lipid catabolic process                                                                                                                                                                                                               |
| N | P53817 | DR | negative regulation of cell cycle                                                                                                                                                                                                     |
| N | P53817 | DR | phospholipase A2 activity                                                                                                                                                                                                             |
| N | P53821 | DE | Putative UPF0320 protein YNL337W;                                                                                                                                                                                                     |
| N | P53967 | DE | Putative uncharacterized protein YNL028W;                                                                                                                                                                                             |
| N | P54022 | DE | 50S ribosomal protein L18e;                                                                                                                                                                                                           |
| N | P54022 | DR | structural constituent of ribosome                                                                                                                                                                                                    |
| N | P54273 | DE | Xylose isomerase;                                                                                                                                                                                                                     |
| N | P54273 | DR | D-xylose metabolic process                                                                                                                                                                                                            |
| N | P54273 | DR | metal ion binding                                                                                                                                                                                                                     |
| N | P54273 | DR | pentose-phosphate shunt                                                                                                                                                                                                               |
| N | P54273 | DR | xylose isomerase activity                                                                                                                                                                                                             |
| N | P54332 | DE | Phage-like element PBSX protein xkdM;                                                                                                                                                                                                 |
| N | P54368 | CC | Binds to, and destabilizes, ornithine decarboxylase which is then degraded                                                                                                                                                            |
| N | P54368 | CC | Also inhibits cellular uptake of polyamines by inactivating the polyamine uptake transporter                                                                                                                                          |
| N | P54368 | CC | SMAD1/OAZ1/PSMB4 complex mediates the degradation of the CREBBP/EP300 repressor SNIP1.                                                                                                                                                |
| N | P54368 | DE | Ornithine decarboxylase antizyme 1;                                                                                                                                                                                                   |
| N | P54368 | DR | ornithine decarboxylase inhibitor activity                                                                                                                                                                                            |
| N | P54368 | DR | polyamine biosynthetic process                                                                                                                                                                                                        |
| N | P54368 | DR | regulation of cellular amino acid metabolic process                                                                                                                                                                                   |
| N | P54377 | CC | The glycine cleavage system catalyzes the degradation of glycine                                                                                                                                                                      |
| N | P54377 | CC | The P protein binds the alpha-amino group of glycine through its pyridoxal phosphate cofactor; CO(2) is released and the remaining methylamine moiety is then transferred to the lipoamide cofactor of the H protein (By similarity). |
| N | P54377 | DE | Glycine cleavage system P-protein subunit 2;                                                                                                                                                                                          |
| N | P54377 | DE | Glycine decarboxylase subunit 2;                                                                                                                                                                                                      |
| N | P54377 | DE | Probable glycine dehydrogenase [decarboxylating] subunit 2;                                                                                                                                                                           |
| N | P54377 | DR | glycine dehydrogenase (decarboxylating) activity                                                                                                                                                                                      |
| N | P54377 | DR | oxidation-reduction process                                                                                                                                                                                                           |
| N | P54377 | DR | pyridoxal phosphate binding                                                                                                                                                                                                           |
| N | P54662 | CC | Regulating factor for the production of extracellular proteases                                                                                                                                                                       |
| N | P54662 | CC | The N-terminal region acts as an inhibitor, whereas the C-terminal region carries enhancing activity.                                                                                                                                 |
| N | P54662 | DE | Transcriptional regulatory protein degU;                                                                                                                                                                                              |
| N | P54662 | DR | regulation of transcription, DNA-dependent                                                                                                                                                                                            |
| N | P54662 | DR | sequence-specific DNA binding                                                                                                                                                                                                         |
| N | P54662 | DR | sequence-specific DNA binding transcription factor activity                                                                                                                                                                           |
| N | P54662 | DR | two-component response regulator activity                                                                                                                                                                                             |

|   |        |    |                                                                                                                                                                   |
|---|--------|----|-------------------------------------------------------------------------------------------------------------------------------------------------------------------|
| N | P54713 | CC | Accessory subunit of the mitochondrial membrane respiratory chain NADH dehydrogenase (Complex I), that is believed not to be involved in catalysis                |
| N | P54713 | CC | Complex I functions in the transfer of electrons from NADH to the respiratory chain                                                                               |
| N | P54713 | CC | The immediate electron acceptor for the enzyme is believed to be ubiquinone (By similarity).                                                                      |
| N | P54713 | DE | Complex I-42kD;                                                                                                                                                   |
| N | P54713 | DE | NADH dehydrogenase [ubiquinone] 1 alpha subcomplex subunit 10;                                                                                                    |
| N | P54713 | DE | NADH-ubiquinone oxidoreductase 42 kDa subunit;                                                                                                                    |
| N | P54713 | DR | electron transport chain                                                                                                                                          |
| N | P54956 | DE | Uncharacterized protein yxeQ;                                                                                                                                     |
| N | P54956 | DR | 2-methylcitrate dehydratase activity                                                                                                                              |
| N | P54956 | DR | propionate catabolic process                                                                                                                                      |
| N | P55024 | CC | This is a copper-containing oxidase that functions in the formation of pigments such as melanins and other polyphenolic compounds                                 |
| N | P55024 | CC | Catalyzes the rate-limiting conversions of tyrosine to DOPA, DOPA to DOPA-quinone and possibly 5,6-dihydroxyindole to indole-5,6 quinone.                         |
| N | P55024 | DE | Monophenol monooxygenase;                                                                                                                                         |
| N | P55024 | DR | melanin biosynthetic process                                                                                                                                      |
| N | P55024 | DR | monophenol monooxygenase activity                                                                                                                                 |
| N | P55024 | DR | oxidation-reduction process                                                                                                                                       |
| N | P55075 | CC | Stimulates growth of the cells in an autocrine manner                                                                                                             |
| N | P55075 | CC | Mediates hormonal action on the growth of cancer cells.                                                                                                           |
| N | P55075 | DE | Androgen-induced growth factor;                                                                                                                                   |
| N | P55075 | DE | Fibroblast growth factor 8;                                                                                                                                       |
| N | P55075 | DE | Heparin-binding growth factor 8;                                                                                                                                  |
| N | P55075 | DR | bone development                                                                                                                                                  |
| N | P55075 | DR | dopaminergic neuron differentiation                                                                                                                               |
| N | P55075 | DR | fibroblast growth factor receptor signaling pathway                                                                                                               |
| N | P55075 | DR | gonad development                                                                                                                                                 |
| N | P55075 | DR | growth factor activity                                                                                                                                            |
| N | P55075 | DR | insulin receptor signaling pathway                                                                                                                                |
| N | P55075 | DR | mesonephros development                                                                                                                                           |
| N | P55075 | DR | metanephros development                                                                                                                                           |
| N | P55075 | DR | neuroepithelial cell differentiation                                                                                                                              |
| N | P55075 | DR | odontogenesis                                                                                                                                                     |
| N | P55075 | DR | positive regulation of cell division                                                                                                                              |
| N | P55075 | DR | positive regulation of cell proliferation                                                                                                                         |
| N | P55075 | DR | type 1 fibroblast growth factor receptor binding                                                                                                                  |
| N | P55075 | DR | type 2 fibroblast growth factor receptor binding                                                                                                                  |
| N | P55089 | CC | Acts in vitro to stimulate the secretion of adrenocorticotrophic hormone (ACTH)                                                                                   |
| N | P55089 | CC | Binds with high affinity to CRF Receptor types 1, 2-alpha, and 2-beta.                                                                                            |
| N | P55089 | DR | neuropeptide hormone activity                                                                                                                                     |
| N | P55121 | CC | Involved in fatty acylation of the protoxin (lktA) at two internal lysine residues, thereby converting it to the active toxin                                     |
| N | P55121 | CC | The acyl donor is ACP (By similarity).                                                                                                                            |
| N | P55121 | DE | Leukotoxin C;                                                                                                                                                     |
| N | P55121 | DE | Leukotoxin-activating lysine-acyltransferase lktC serotype A11;                                                                                                   |
| N | P55121 | DE | Toxin-activating protein C;                                                                                                                                       |
| N | P55121 | DR | acyltransferase activity                                                                                                                                          |
| N | P55121 | DR | hemolysis in other organism                                                                                                                                       |
| N | P55121 | DR | toxin metabolic process                                                                                                                                           |
| N | P55289 | CC | Cadherins are calcium dependent cell adhesion proteins                                                                                                            |
| N | P55289 | CC | they preferentially interact with themselves in a homophilic manner in connecting cells; cadherins may thus contribute to the sorting of heterogeneous cell types |
| N | P55289 | DE | BR-cadherin;                                                                                                                                                      |
| N | P55289 | DE | Brain cadherin;                                                                                                                                                   |
| N | P55289 | DE | Cadherin-12;                                                                                                                                                      |
| N | P55289 | DE | N-cadherin 2;                                                                                                                                                     |
| N | P55289 | DE | Neural type cadherin 2;                                                                                                                                           |
| N | P55289 | DR | adherens junction organization                                                                                                                                    |
| N | P55289 | DR | calcium ion binding                                                                                                                                               |
| N | P55289 | DR | cell junction assembly                                                                                                                                            |
| N | P55289 | DR | homophilic cell adhesion                                                                                                                                          |
| N | P55505 | DE | Uncharacterized protein y4jE;                                                                                                                                     |
| N | P55507 | DE | Uncharacterized protein y4jG;                                                                                                                                     |

|   |        |    |                                                                                                                                                                                                      |
|---|--------|----|------------------------------------------------------------------------------------------------------------------------------------------------------------------------------------------------------|
| N | P55663 | DE | Uncharacterized hydrolase y4tI;                                                                                                                                                                      |
| N | P55663 | DR | hydrolase activity                                                                                                                                                                                   |
| N | P55691 | CC | Possible binding-protein with either a transport or enzymatic activity.                                                                                                                              |
| N | P55691 | DE | Uncharacterized protein y4wM;                                                                                                                                                                        |
| N | P55691 | DR | transporter activity                                                                                                                                                                                 |
| N | P55699 | DE | Uncharacterized protein y4xG;                                                                                                                                                                        |
| N | P55812 | DE | Ubiquitin-like protein FUBI;                                                                                                                                                                         |
| N | P55927 | CC | Potent inhibitor of the A-type voltage-gated potassium channels                                                                                                                                      |
| N | P55927 | CC | Most potent inhibitor of Kv1.2/KCNA2 channels                                                                                                                                                        |
| N | P55927 | CC | Reversibly block the Shaker B potassium-channels (Kv1.1 sub- family).                                                                                                                                |
| N | P55927 | DE | DE Flags: Precursor; Fragment;                                                                                                                                                                       |
| N | P55927 | DE | Pandinoxin-alpha;                                                                                                                                                                                    |
| N | P55927 | DE | Potassium channel toxin alpha-KTx 7.1;                                                                                                                                                               |
| N | P55927 | DE | Potassium channel-blocking toxin 2;                                                                                                                                                                  |
| N | P55927 | DE | Toxin PiTX-K-alpha;                                                                                                                                                                                  |
| N | P55927 | DR | potassium channel inhibitor activity                                                                                                                                                                 |
| N | P55946 | CC | The metallothioneins are involved in the cellular sequestration of toxic metal ions and regulation of essential trace elements.                                                                      |
| N | P55946 | DE | Metallothionein;                                                                                                                                                                                     |
| N | P55946 | DR | metal ion binding                                                                                                                                                                                    |
| N | P55975 | CC | Associates with the EF-Tu.GDP complex and induces the exchange of GDP to GTP                                                                                                                         |
| N | P55975 | CC | It remains bound to the aminoacyl-tRNA.EF-Tu.GTP complex up to the GTP hydrolysis stage on the ribosome.                                                                                             |
| N | P55975 | DE | Elongation factor Ts;                                                                                                                                                                                |
| N | P55975 | DR | translation elongation factor activity                                                                                                                                                               |
| N | P55985 | CC | Responsible for synthesis of pseudouridine from uracil- 13 in transfer RNAs (By similarity).                                                                                                         |
| N | P55985 | DE | tRNA pseudouridine synthase D;                                                                                                                                                                       |
| N | P55985 | DE | tRNA pseudouridylate synthase D;                                                                                                                                                                     |
| N | P55985 | DE | tRNA-uridine isomerase D;                                                                                                                                                                            |
| N | P55985 | DR | pseudouridine synthase activity                                                                                                                                                                      |
| N | P55985 | DR | pseudouridine synthesis                                                                                                                                                                              |
| N | P55985 | DR | tRNA processing                                                                                                                                                                                      |
| N | P56061 | CC | Catalyzes the condensation of pantoate with beta-alanine in an ATP-dependent reaction via a pantoate-adenylate intermediate (By similarity).                                                         |
| N | P56061 | DE | Pantoate--beta-alanine ligase;                                                                                                                                                                       |
| N | P56061 | DE | Pantoate-activating enzyme;                                                                                                                                                                          |
| N | P56061 | DE | Pantothenate synthetase;                                                                                                                                                                             |
| N | P56061 | DR | pantoate-beta-alanine ligase activity                                                                                                                                                                |
| N | P56061 | DR | pantothenate biosynthetic process                                                                                                                                                                    |
| N | P56069 | DE | Cystathionine gamma-synthase;                                                                                                                                                                        |
| N | P56069 | DE | O-succinylhomoserine (thiol)-lyase;                                                                                                                                                                  |
| N | P56069 | DR | cystathionine gamma-synthase activity                                                                                                                                                                |
| N | P56069 | DR | methionine biosynthetic process                                                                                                                                                                      |
| N | P56069 | DR | pyridoxal phosphate binding                                                                                                                                                                          |
| N | P56097 | CC | This protein is essential to the cell-division process                                                                                                                                               |
| N | P56097 | CC | Binds to and hydrolyzes GTP                                                                                                                                                                          |
| N | P56097 | CC | Involved in the synthesis of the septal peptidoglycan (By similarity).                                                                                                                               |
| N | P56097 | CC | It seems to assemble into a dynamic ring on the inner surface of the cytoplasmic membrane at the place where division will occur, and the formation of the ring is the signal for septation to begin |
| N | P56097 | DE | Cell division protein ftsZ;                                                                                                                                                                          |
| N | P56097 | DR | GTPase activity                                                                                                                                                                                      |
| N | P56097 | DR | barrier septum formation                                                                                                                                                                             |
| N | P56097 | DR | protein polymerization                                                                                                                                                                               |
| N | P56241 | CC | Antibacterial peptide, that adopts an alpha helical conformation which can disrupt bacterial membranes                                                                                               |
| N | P56241 | CC | Each caerin displays a different antimicrobial specificity.                                                                                                                                          |
| N | P56241 | DR | defense response to bacterium                                                                                                                                                                        |
| N | P56277 | DE | MTCP-1 type A;                                                                                                                                                                                       |
| N | P56277 | DE | Mature T-cell proliferation 1 neighbor protein;                                                                                                                                                      |
| N | P56277 | DE | Mature T-cell proliferation-1 type A;                                                                                                                                                                |
| N | P56277 | DE | Protein p8 MTCP-1;                                                                                                                                                                                   |
| N | P56277 | DR | cell proliferation                                                                                                                                                                                   |

|   |        |    |                                                                                                                                                                                          |
|---|--------|----|------------------------------------------------------------------------------------------------------------------------------------------------------------------------------------------|
| N | P56306 | CC | Component of the cytochrome b6-f complex, which mediates electron transfer between photosystem II (PSII) and photosystem I (PSI), cyclic electron flow around PSI, and state transitions |
| N | P56306 | CC | PetL is important for photoautotrophic growth as well as for electron transfer efficiency and stability of the cytochrome b6-f complex (By similarity).                                  |
| N | P56306 | DE | Cytochrome b6-f complex subunit 6;                                                                                                                                                       |
| N | P56306 | DE | Cytochrome b6-f complex subunit VI;                                                                                                                                                      |
| N | P56306 | DE | Cytochrome b6-f complex subunit petL;                                                                                                                                                    |
| N | P56306 | DR | electron carrier activity                                                                                                                                                                |
| N | P56306 | DR | electron transport chain                                                                                                                                                                 |
| N | P56306 | DR | photosynthesis                                                                                                                                                                           |
| N | P56325 | DE | Photosystem II reaction center protein M;                                                                                                                                                |
| N | P56325 | DR | photosynthesis, light reaction                                                                                                                                                           |
| N | P56348 | CC | This protein is a component of the reaction center of photosystem II.                                                                                                                    |
| N | P56348 | DE | Photosystem II reaction center protein K;                                                                                                                                                |
| N | P56348 | DR | photosynthesis                                                                                                                                                                           |
| N | P56425 | CC | Exerts a potent antimicrobial activity.                                                                                                                                                  |
| N | P56425 | DE | Antibacterial peptide BMAP-34;                                                                                                                                                           |
| N | P56425 | DE | Cathelicidin-7;                                                                                                                                                                          |
| N | P56425 | DR | defense response to bacterium                                                                                                                                                            |
| N | P56589 | CC | Involved in peroxisome biosynthesis and integrity                                                                                                                                        |
| N | P56589 | CC | As a docking factor for PEX19, is necessary for the import of peroxisomal membrane proteins in the peroxisomes.                                                                          |
| N | P56589 | CC | Assembles membrane vesicles before the matrix proteins are translocated                                                                                                                  |
| N | P56589 | DE | Peroxisomal assembly protein PEX3;                                                                                                                                                       |
| N | P56589 | DE | Peroxisomal biogenesis factor 3;                                                                                                                                                         |
| N | P56589 | DR | protein binding                                                                                                                                                                          |
| N | P56589 | DR | protein import into peroxisome membrane                                                                                                                                                  |
| N | P56589 | DR | transmembrane transport                                                                                                                                                                  |
| N | P56825 | CC | Hemocyanins are copper-containing oxygen carriers occurring freely dissolved in the hemolymph of many mollusks and arthropods.                                                           |
| N | P56825 | DE | Hemocyanin, units E and F;                                                                                                                                                               |
| N | P56825 | DR | metal ion binding                                                                                                                                                                        |
| N | P56825 | DR | oxidoreductase activity                                                                                                                                                                  |
| N | P56825 | DR | oxygen transporter activity                                                                                                                                                              |
| N | P56848 | CC | Catalyzes the phosphorylation of the position 2 hydroxy group of 4-diphosphocytidyl-2C-methyl-D-erythritol (By similarity).                                                              |
| N | P56848 | DE | 4-(cytidine-5'-diphospho)-2-C-methyl-D-erythritol kinase;                                                                                                                                |
| N | P56848 | DE | 4-diphosphocytidyl-2-C-methyl-D-erythritol kinase, chloroplastic;                                                                                                                        |
| N | P56848 | DR | 4-(cytidine 5'-diphospho)-2-C-methyl-D-erythritol kinase activity                                                                                                                        |
| N | P56848 | DR | terpenoid biosynthetic process                                                                                                                                                           |
| N | P57360 | CC | Binds tightly to ds-DNA, increases its thermal stability and inhibits transcription (By similarity).                                                                                     |
| N | P57360 | DE | DNA-binding protein H-NS homolog;                                                                                                                                                        |
| N | P57360 | DR | regulation of transcription, DNA-dependent                                                                                                                                               |
| N | P57460 | CC | Involved in protein export                                                                                                                                                               |
| N | P57460 | CC | Participates in an early event of protein translocation (By similarity).                                                                                                                 |
| N | P57460 | DE | Protein-export membrane protein secG;                                                                                                                                                    |
| N | P57460 | DR | P-P-bond-hydrolysis-driven protein transmembrane transporter activity                                                                                                                    |
| N | P57460 | DR | protein secretion                                                                                                                                                                        |
| N | P57484 | CC | Could accelerate the degradation of some genes transcripts potentially through selective RNA binding (By similarity).                                                                    |
| N | P57484 | DE | Carbon storage regulator homolog;                                                                                                                                                        |
| N | P57484 | DR | mRNA catabolic process                                                                                                                                                                   |
| N | P57484 | DR | regulation of carbohydrate metabolic process                                                                                                                                             |
| N | P57563 | CC | Removes the formyl group from the N-terminal Met of newly synthesized proteins                                                                                                           |
| N | P57563 | CC | N-terminal L-methionine is a prerequisite for activity but the enzyme has broad specificity at other positions (By similarity).                                                          |
| N | P57563 | CC | Requires at least a dipeptide for an efficient rate of reaction                                                                                                                          |
| N | P57563 | DE | Peptide deformylase;                                                                                                                                                                     |
| N | P57563 | DE | Polypeptide deformylase;                                                                                                                                                                 |
| N | P57563 | DR | iron ion binding                                                                                                                                                                         |
| N | P57563 | DR | peptide deformylase activity                                                                                                                                                             |
| N | P57591 | CC | One of the primary rRNA binding proteins, it binds directly near the 3'-end of the 23S rRNA, where it nucleates assembly of the 50S subunit (By similarity).                             |

|   |        |    |                                                                                                                                                                                                       |
|---|--------|----|-------------------------------------------------------------------------------------------------------------------------------------------------------------------------------------------------------|
| N | P57591 | DE | 50S ribosomal protein L3;                                                                                                                                                                             |
| N | P57591 | DR | structural constituent of ribosome                                                                                                                                                                    |
| N | P57667 | CC | 3'-to-5' exoribonuclease specific for small oligoribonucleotides.                                                                                                                                     |
| N | P57667 | DE | Oligoribonuclease;                                                                                                                                                                                    |
| N | P57667 | DR | exonuclease activity                                                                                                                                                                                  |
| N | P57667 | DR | nucleic acid binding                                                                                                                                                                                  |
| N | P57739 | CC | Plays a major role in tight junction-specific obliteration of the intercellular space, through calcium- independent cell-adhesion activity (By similarity).                                           |
| N | P57739 | DR | calcium-independent cell-cell adhesion                                                                                                                                                                |
| N | P57739 | DR | identical protein binding                                                                                                                                                                             |
| N | P57739 | DR | structural molecule activity                                                                                                                                                                          |
| N | P57828 | DE | AICAR transformylase;                                                                                                                                                                                 |
| N | P57828 | DE | Bifunctional purine biosynthesis protein purH;                                                                                                                                                        |
| N | P57828 | DE | IMP cyclohydrolase;                                                                                                                                                                                   |
| N | P57828 | DE | IMP synthase;                                                                                                                                                                                         |
| N | P57828 | DE | Inosinase;                                                                                                                                                                                            |
| N | P57828 | DE | Phosphoribosylaminoimidazolecarboxamide formyltransferase;                                                                                                                                            |
| N | P57828 | DR | IMP biosynthetic process                                                                                                                                                                              |
| N | P57828 | DR | IMP cyclohydrolase activity                                                                                                                                                                           |
| N | P57828 | DR | phosphoribosylaminoimidazolecarboxamide formyltransferase activity                                                                                                                                    |
| N | P57903 | CC | Catalyzes a trans-dehydration via an enolate intermediate (By similarity).                                                                                                                            |
| N | P57903 | DE | 3-dehydroquinase;                                                                                                                                                                                     |
| N | P57903 | DE | 3-dehydroquinase dehydratase;                                                                                                                                                                         |
| N | P57903 | DE | Type II DHQase;                                                                                                                                                                                       |
| N | P57903 | DR | 3-dehydroquinase dehydratase activity                                                                                                                                                                 |
| N | P57903 | DR | aromatic amino acid family biosynthetic process                                                                                                                                                       |
| N | P58017 | DE | UPF0147 protein SSO6503;                                                                                                                                                                              |
| N | P58160 | CC | Transfers 2-(5"-triphosphoribosyl)-3'- dephosphocoenzyme-A on a serine residue to the apo-acyl carrier protein (gamma chain) of the citrate lyase to yield holo-acyl carrier protein (By similarity). |
| N | P58160 | DE | Apo-ACP nucleodityltransferase;                                                                                                                                                                       |
| N | P58160 | DE | Holo-ACP synthase;                                                                                                                                                                                    |
| N | P58160 | DE | Holo-citrate lyase synthase;                                                                                                                                                                          |
| N | P58160 | DE | Probable apo-citrate lyase phosphoribosyl-dephospho-CoA transferase;                                                                                                                                  |
| N | P58160 | DR | holo-citrate lyase synthase activity                                                                                                                                                                  |
| N | P58160 | DR | prosthetic group biosynthetic process                                                                                                                                                                 |
| N | P58272 | CC | No specific function has so far been attributed to this initiation factor; however, it seems to stimulate more or less all the activities of the other two initiation factors, IF 2 and IF 3.         |
| N | P58272 | DE | Translation initiation factor IF-1, chloroplastic;                                                                                                                                                    |
| N | P58272 | DR | translation initiation factor activity                                                                                                                                                                |
| N | P58372 | DE | 60S ribosomal protein L30;                                                                                                                                                                            |
| N | P58372 | DR | structural constituent of ribosome                                                                                                                                                                    |
| N | P58478 | CC | Molecular chaperone                                                                                                                                                                                   |
| N | P58478 | CC | Has ATPase activity (By similarity).                                                                                                                                                                  |
| N | P58478 | DE | Chaperone protein htpG;                                                                                                                                                                               |
| N | P58478 | DE | Heat shock protein htpG;                                                                                                                                                                              |
| N | P58478 | DE | High temperature protein G;                                                                                                                                                                           |
| N | P58478 | DR | protein folding                                                                                                                                                                                       |
| N | P58478 | DR | response to stress                                                                                                                                                                                    |
| N | P58478 | DR | unfolded protein binding                                                                                                                                                                              |
| N | P58583 | DE | Photosystem I reaction center subunit Psak 1;                                                                                                                                                         |
| N | P58583 | DE | Photosystem I subunit X 1;                                                                                                                                                                            |
| N | P58583 | DR | photosynthesis                                                                                                                                                                                        |
| N | P58693 | DE | Asparagine--tRNA ligase;                                                                                                                                                                              |
| N | P58693 | DE | Asparaginyl-tRNA synthetase;                                                                                                                                                                          |
| N | P58693 | DR | asparagine-tRNA ligase activity                                                                                                                                                                       |
| N | P58693 | DR | asparaginyl-tRNA aminoacylation                                                                                                                                                                       |
| N | P58693 | DR | aspartate-tRNA ligase activity                                                                                                                                                                        |
| N | P58693 | DR | aspartyl-tRNA aminoacylation                                                                                                                                                                          |
| N | P58693 | DR | nucleic acid binding                                                                                                                                                                                  |
| N | P59204 | CC | Has a role in maltotetraose utilization.                                                                                                                                                              |
| N | P59204 | DE | Maltodextrose utilization protein malA;                                                                                                                                                               |
| N | P59362 | CC | Catalyzes the first step in hexosamine metabolism, converting fructose-6P into glucosamine-6P using glutamine as a nitrogen source (By similarity).                                                   |
| N | P59362 | DE | D-fructose-6-phosphate amidotransferase;                                                                                                                                                              |

|   |        |    |                                                                                                                                                                                                                                       |
|---|--------|----|---------------------------------------------------------------------------------------------------------------------------------------------------------------------------------------------------------------------------------------|
| N | P59362 | DE | Glucosamine--fructose-6-phosphate aminotransferase [isomerizing];                                                                                                                                                                     |
| N | P59362 | DE | Glucosamine-6-phosphate synthase;                                                                                                                                                                                                     |
| N | P59362 | DE | Hexosephosphate aminotransferase;                                                                                                                                                                                                     |
| N | P59362 | DE | L-glutamine-D-fructose-6-phosphate amidotransferase;                                                                                                                                                                                  |
| N | P59362 | DR | carbohydrate biosynthetic process                                                                                                                                                                                                     |
| N | P59362 | DR | glutamine metabolic process                                                                                                                                                                                                           |
| N | P59362 | DR | glutamine-fructose-6-phosphate transaminase (isomerizing) activity                                                                                                                                                                    |
| N | P59362 | DR | sugar binding                                                                                                                                                                                                                         |
| N | P59379 | CC | Located on the platform of the 30S subunit, it bridges several disparate RNA helices of the 16S rRNA                                                                                                                                  |
| N | P59379 | CC | Forms part of the Shine-Dalgarno cleft in the 70S ribosome (By similarity).                                                                                                                                                           |
| N | P59379 | DE | 30S ribosomal protein S11;                                                                                                                                                                                                            |
| N | P59379 | DR | structural constituent of ribosome                                                                                                                                                                                                    |
| N | P59416 | DE | 3-phosphoshikimate 1-carboxyvinyltransferase;                                                                                                                                                                                         |
| N | P59416 | DE | 5-enolpyruvylshikimate-3-phosphate synthase;                                                                                                                                                                                          |
| N | P59416 | DE | EPSP synthase;                                                                                                                                                                                                                        |
| N | P59416 | DR | 3-phosphoshikimate 1-carboxyvinyltransferase activity                                                                                                                                                                                 |
| N | P59416 | DR | aromatic amino acid family biosynthetic process                                                                                                                                                                                       |
| N | P59466 | DE | Tryptophan--tRNA ligase;                                                                                                                                                                                                              |
| N | P59466 | DE | Tryptophanyl-tRNA synthetase;                                                                                                                                                                                                         |
| N | P59466 | DR | tryptophan-tRNA ligase activity                                                                                                                                                                                                       |
| N | P59466 | DR | tryptophanyl-tRNA aminoacylation                                                                                                                                                                                                      |
| N | P59645 | CC | Induces a hyperpolarization-activated chloride current when expressed in <i>Xenopus</i> oocytes                                                                                                                                       |
| N | P59645 | CC | May be a modulator capable of activating endogenous oocyte channels.                                                                                                                                                                  |
| N | P59645 | DE | FXD domain-containing ion transport regulator 3;                                                                                                                                                                                      |
| N | P59645 | DR | ion channel activity                                                                                                                                                                                                                  |
| N | P59664 | DE | Phenylalanine--tRNA ligase beta chain;                                                                                                                                                                                                |
| N | P59664 | DE | Phenylalanyl-tRNA synthetase beta chain;                                                                                                                                                                                              |
| N | P59664 | DR | magnesium ion binding                                                                                                                                                                                                                 |
| N | P59664 | DR | phenylalanine-tRNA ligase activity                                                                                                                                                                                                    |
| N | P59664 | DR | phenylalanyl-tRNA aminoacylation                                                                                                                                                                                                      |
| N | P59664 | DR | tRNA processing                                                                                                                                                                                                                       |
| N | P59804 | DE | ESAT-6-like protein esxL;                                                                                                                                                                                                             |
| N | P59960 | DE | Protein dipZ;                                                                                                                                                                                                                         |
| N | P59960 | DR | antioxidant activity                                                                                                                                                                                                                  |
| N | P59960 | DR | cell redox homeostasis                                                                                                                                                                                                                |
| N | P59960 | DR | cytochrome complex assembly                                                                                                                                                                                                           |
| N | P59960 | DR | electron carrier activity                                                                                                                                                                                                             |
| N | P59960 | DR | glycerol ether metabolic process                                                                                                                                                                                                      |
| N | P59960 | DR | oxidation-reduction process                                                                                                                                                                                                           |
| N | P59960 | DR | protein disulfide oxidoreductase activity                                                                                                                                                                                             |
| N | P59994 | CC | Pore-forming (alpha) subunit of voltage-gated rapidly inactivating A-type potassium channels                                                                                                                                          |
| N | P59994 | CC | Channel properties are modulated by interactions with other alpha subunits and with regulatory subunits.                                                                                                                              |
| N | P59994 | CC | May contribute to I(To) current in heart and I(Sa) current in neurons                                                                                                                                                                 |
| N | P59994 | DE | Potassium voltage-gated channel subfamily D member 1;                                                                                                                                                                                 |
| N | P59994 | DE | Voltage-gated potassium channel subunit Kv4.1;                                                                                                                                                                                        |
| N | P59994 | DR | voltage-gated potassium channel activity                                                                                                                                                                                              |
| N | P60143 | CC | Required for PSII activity (By similarity).                                                                                                                                                                                           |
| N | P60143 | DE | PSII 5 kDa protein;                                                                                                                                                                                                                   |
| N | P60143 | DE | Photosystem II reaction center protein L;                                                                                                                                                                                             |
| N | P60143 | DR | photosynthesis                                                                                                                                                                                                                        |
| N | P60159 | CC | Core subunit of the mitochondrial membrane respiratory chain NADH dehydrogenase (Complex I) that is believed to belong to the minimal assembly required for catalysis in the transfer of electrons from NADH to the respiratory chain |
| N | P60159 | CC | The immediate electron acceptor for the enzyme is believed to be ubiquinone (By similarity).                                                                                                                                          |
| N | P60159 | DE | NADH dehydrogenase subunit 3;                                                                                                                                                                                                         |
| N | P60159 | DE | NADH-ubiquinone oxidoreductase chain 3;                                                                                                                                                                                               |
| N | P60159 | DR | NADH dehydrogenase (ubiquinone) activity                                                                                                                                                                                              |
| N | P60159 | DR | electron transport chain                                                                                                                                                                                                              |
| N | P60164 | CC | Binds and inhibits voltage-sensitive potassium channels                                                                                                                                                                               |
| N | P60164 | CC | inhibits the vertebrate potassium channels Kv1.1, Kv1.2 and Kv1.3 with low affinity.                                                                                                                                                  |

|   |        |    |                                                                                                                                                                                                                                                                                                                                                                         |
|---|--------|----|-------------------------------------------------------------------------------------------------------------------------------------------------------------------------------------------------------------------------------------------------------------------------------------------------------------------------------------------------------------------------|
| N | P60164 | DE | Parabutoxin-1;                                                                                                                                                                                                                                                                                                                                                          |
| N | P60164 | DE | Potassium channel toxin alpha-KTx 11.1;                                                                                                                                                                                                                                                                                                                                 |
| N | P60164 | DR | potassium channel inhibitor activity                                                                                                                                                                                                                                                                                                                                    |
| N | P60341 | CC | Responsible for synthesis of pseudouridine from uracil- 55 in the psi GC loop of transfer RNAs (By similarity).                                                                                                                                                                                                                                                         |
| N | P60341 | DE | Psi55 synthase;                                                                                                                                                                                                                                                                                                                                                         |
| N | P60341 | DE | tRNA pseudouridine 55 synthase;                                                                                                                                                                                                                                                                                                                                         |
| N | P60341 | DE | tRNA pseudouridine synthase B;                                                                                                                                                                                                                                                                                                                                          |
| N | P60341 | DE | tRNA pseudouridylate synthase;                                                                                                                                                                                                                                                                                                                                          |
| N | P60341 | DE | tRNA-uridine isomerase;                                                                                                                                                                                                                                                                                                                                                 |
| N | P60341 | DR | pseudouridine synthase activity                                                                                                                                                                                                                                                                                                                                         |
| N | P60341 | DR | pseudouridine synthesis                                                                                                                                                                                                                                                                                                                                                 |
| N | P60341 | DR | tRNA processing                                                                                                                                                                                                                                                                                                                                                         |
| N | P60356 | DE | UPF0297 protein lin1538;<br>In the hair cortex, hair keratin intermediate filaments are embedded in an interfilamentous matrix, consisting of hair keratin-associated proteins (KRTAP), which are essential for the formation of a rigid and resistant hair shaft through their extensive disulfide bond cross-linking with abundant cysteine residues of hair keratine |
| N | P60368 | CC | The matrix proteins include the high- sulfur and high-glycine-tyrosine keratins.                                                                                                                                                                                                                                                                                        |
| N | P60368 | CC | High sulfur keratin-associated protein 10.2;                                                                                                                                                                                                                                                                                                                            |
| N | P60368 | DE | Keratin-associated protein 10-2;                                                                                                                                                                                                                                                                                                                                        |
| N | P60368 | DE | Keratin-associated protein 10.2;                                                                                                                                                                                                                                                                                                                                        |
| N | P60368 | DE | Keratin-associated protein 18-2;                                                                                                                                                                                                                                                                                                                                        |
| N | P60368 | DE | Keratin-associated protein 18.2;                                                                                                                                                                                                                                                                                                                                        |
| N | P60383 | CC | Modulates transcription in response to changes in cellular NADH/NAD(+) redox state (By similarity).                                                                                                                                                                                                                                                                     |
| N | P60383 | DE | Redox-sensing transcriptional repressor rex;                                                                                                                                                                                                                                                                                                                            |
| N | P60383 | DR | catalytic activity                                                                                                                                                                                                                                                                                                                                                      |
| N | P60383 | DR | response to redox state                                                                                                                                                                                                                                                                                                                                                 |
| N | P60383 | DR | transcription repressor activity                                                                                                                                                                                                                                                                                                                                        |
| N | P60389 | CC | Modulates transcription in response to changes in cellular NADH/NAD(+) redox state (By similarity).                                                                                                                                                                                                                                                                     |
| N | P60389 | DE | Redox-sensing transcriptional repressor rex;                                                                                                                                                                                                                                                                                                                            |
| N | P60389 | DR | catalytic activity                                                                                                                                                                                                                                                                                                                                                      |
| N | P60389 | DR | response to redox state                                                                                                                                                                                                                                                                                                                                                 |
| N | P60389 | DR | transcription repressor activity                                                                                                                                                                                                                                                                                                                                        |
| N | P60422 | CC | One of the primary rRNA binding proteins                                                                                                                                                                                                                                                                                                                                |
| N | P60422 | CC | it has been suggested to have peptidyltransferase activity, this is highly controversial                                                                                                                                                                                                                                                                                |
| N | P60422 | CC | Located near the base of the L1 stalk, it is probably also mobile                                                                                                                                                                                                                                                                                                       |
| N | P60422 | CC | Required for association of the 30S and 50S subunits to form the 70S ribosome, for tRNA binding and peptide bond formation                                                                                                                                                                                                                                              |
| N | P60422 | DE | 50S ribosomal protein L2;                                                                                                                                                                                                                                                                                                                                               |
| N | P60422 | DR | protein binding                                                                                                                                                                                                                                                                                                                                                         |
| N | P60422 | DR | structural constituent of ribosome                                                                                                                                                                                                                                                                                                                                      |
| N | P60422 | DR | transferase activity                                                                                                                                                                                                                                                                                                                                                    |
| N | P60422 | DR | zinc ion binding                                                                                                                                                                                                                                                                                                                                                        |
| N | P60666 | CC | IGPS catalyzes the conversion of PRFAR and glutamine to IGP, AICAR and glutamate                                                                                                                                                                                                                                                                                        |
| N | P60666 | CC | The hisF subunit catalyzes the cyclization activity that produces IGP and AICAR from PRFAR using the ammonia provided by the hisH subunit (By similarity).                                                                                                                                                                                                              |
| N | P60666 | DE | IGP synthase cyclase subunit;                                                                                                                                                                                                                                                                                                                                           |
| N | P60666 | DE | IGP synthase subunit hisF;                                                                                                                                                                                                                                                                                                                                              |
| N | P60666 | DE | IGPS subunit hisF;                                                                                                                                                                                                                                                                                                                                                      |
| N | P60666 | DE | ImGP synthase subunit hisF;                                                                                                                                                                                                                                                                                                                                             |
| N | P60666 | DE | Imidazole glycerol phosphate synthase subunit hisF;                                                                                                                                                                                                                                                                                                                     |
| N | P60666 | DR | histidine biosynthetic process                                                                                                                                                                                                                                                                                                                                          |
| N | P60666 | DR | imidazoleglycerol-phosphate synthase activity                                                                                                                                                                                                                                                                                                                           |
| N | P60666 | DR | lyase activity                                                                                                                                                                                                                                                                                                                                                          |
| N | P60793 | CC | Required for accurate and efficient protein synthesis under certain stress conditions                                                                                                                                                                                                                                                                                   |
| N | P60793 | CC | Back- translocation proceeds from a post-translocation (POST) complex to a pre-translocation (PRE) complex, thus giving elongation factor G a second chance to translocate the tRNAs correctly                                                                                                                                                                          |
| N | P60793 | CC | Binds to ribosomes in a GTP-dependent manner (By similarity).                                                                                                                                                                                                                                                                                                           |
| N | P60793 | CC | May act as a fidelity factor of the translation reaction, by catalyzing a one-codon backward translocation of tRNAs on improperly translocated ribosomes                                                                                                                                                                                                                |
| N | P60793 | DE | Elongation factor 4;                                                                                                                                                                                                                                                                                                                                                    |

|   |        |    |                                                                                                                                                                                                                                                                                                                                                                                                 |
|---|--------|----|-------------------------------------------------------------------------------------------------------------------------------------------------------------------------------------------------------------------------------------------------------------------------------------------------------------------------------------------------------------------------------------------------|
| N | P60793 | DE | Ribosomal back-translocase LepA;                                                                                                                                                                                                                                                                                                                                                                |
| N | P60793 | DR | GTPase activity                                                                                                                                                                                                                                                                                                                                                                                 |
| N | P60859 | CC | Catalyzes the sequential NAD-dependent oxidations of L- histidinol to L-histidinaldehyde and then to L-histidine (By similarity).                                                                                                                                                                                                                                                               |
| N | P60859 | DE | Histidinol dehydrogenase;                                                                                                                                                                                                                                                                                                                                                                       |
| N | P60859 | DR | histidine biosynthetic process                                                                                                                                                                                                                                                                                                                                                                  |
| N | P60859 | DR | histidinol dehydrogenase activity                                                                                                                                                                                                                                                                                                                                                               |
| N | P60859 | DR | oxidation-reduction process                                                                                                                                                                                                                                                                                                                                                                     |
| N | P60859 | DR | zinc ion binding                                                                                                                                                                                                                                                                                                                                                                                |
| N | P60869 | DE | Putative transport protein YbjL;                                                                                                                                                                                                                                                                                                                                                                |
| N | P60869 | DR | cation transmembrane transporter activity                                                                                                                                                                                                                                                                                                                                                       |
| N | P60869 | DR | potassium ion transport                                                                                                                                                                                                                                                                                                                                                                         |
| N | P61017 | CC | Protein transport                                                                                                                                                                                                                                                                                                                                                                               |
| N | P61017 | CC | Probably involved in vesicular traffic (By similarity).                                                                                                                                                                                                                                                                                                                                         |
| N | P61017 | DE | Ras-related protein Rab-4B;                                                                                                                                                                                                                                                                                                                                                                     |
| N | P61017 | DR | protein transport                                                                                                                                                                                                                                                                                                                                                                               |
| N | P61017 | DR | small GTPase mediated signal transduction                                                                                                                                                                                                                                                                                                                                                       |
| N | P61039 | CC | Component of the cytochrome b6-f complex, which mediates electron transfer between photosystem II (PSII) and photosystem I (PSI), cyclic electron flow around PSI, and state transitions (By similarity).                                                                                                                                                                                       |
| N | P61039 | DE | Cytochrome b6-f complex subunit 8;                                                                                                                                                                                                                                                                                                                                                              |
| N | P61039 | DE | Cytochrome b6-f complex subunit VIII;                                                                                                                                                                                                                                                                                                                                                           |
| N | P61039 | DE | Cytochrome b6-f complex subunit petN;                                                                                                                                                                                                                                                                                                                                                           |
| N | P61039 | DR | cytochrome complex assembly                                                                                                                                                                                                                                                                                                                                                                     |
| N | P61039 | DR | electron transport chain                                                                                                                                                                                                                                                                                                                                                                        |
| N | P61039 | DR | electron transporter, transferring electrons within cytochrome b6/f complex of photosystem II activity                                                                                                                                                                                                                                                                                          |
| N | P61039 | DR | photosynthesis                                                                                                                                                                                                                                                                                                                                                                                  |
| N | P61216 | CC | TFIID beta-specific TAFII (By similarity).                                                                                                                                                                                                                                                                                                                                                      |
| N | P61216 | DE | Transcription initiation factor TFIID 18 kDa subunit;                                                                                                                                                                                                                                                                                                                                           |
| N | P61216 | DE | Transcription initiation factor TFIID subunit 13;                                                                                                                                                                                                                                                                                                                                               |
| N | P61216 | DR | RNA polymerase II transcription factor activity                                                                                                                                                                                                                                                                                                                                                 |
| N | P61216 | DR | transcription from RNA polymerase II promoter                                                                                                                                                                                                                                                                                                                                                   |
| N | P61239 | DE | 30S ribosomal protein S27ae;                                                                                                                                                                                                                                                                                                                                                                    |
| N | P61239 | DR | metal ion binding                                                                                                                                                                                                                                                                                                                                                                               |
| N | P61239 | DR | structural constituent of ribosome                                                                                                                                                                                                                                                                                                                                                              |
| N | P61326 | CC | Component of a splicing-dependent multiprotein exon junction complex (EJC) deposited at splice junction on mRNAs                                                                                                                                                                                                                                                                                |
| N | P61326 | CC | Core components of the EJC, that remains bound to spliced mRNAs throughout all stages of mRNA metabolism, functions to mark the position of the exon-exon junction in the mature mRNA and thereby influences downstream processes of gene expression including mRNA splicing, nuclear mRNA export, subcellular mRNA localization, translation efficiency and nonsense-mediated mRNA decay (NMD) |
| N | P61326 | CC | Remains associated with the mRNA after its export to the cytoplasm and require translation of the mRNA for removal                                                                                                                                                                                                                                                                              |
| N | P61326 | CC | The EJC is a dynamic structure consisting of a few core proteins and several more peripheral nuclear and cytoplasmic associated factors that join the complex only transiently either during EJC assembly or during subsequent mRNA metabolism                                                                                                                                                  |
| N | P61326 | CC | The heterodimer MAGOH-RBM8A interacts with PYM that function to enhance the translation of EJC-bearing spliced mRNAs by recruiting them to the ribosomal 48S preinitiation complex.                                                                                                                                                                                                             |
| N | P61326 | DE | Protein mago nashi homolog;                                                                                                                                                                                                                                                                                                                                                                     |
| N | P61326 | DR | mRNA 3'-end processing                                                                                                                                                                                                                                                                                                                                                                          |
| N | P61326 | DR | mRNA export from nucleus                                                                                                                                                                                                                                                                                                                                                                        |
| N | P61326 | DR | nuclear mRNA splicing, via spliceosome                                                                                                                                                                                                                                                                                                                                                          |
| N | P61326 | DR | nuclear-transcribed mRNA catabolic process, nonsense-mediated decay                                                                                                                                                                                                                                                                                                                             |
| N | P61326 | DR | protein binding                                                                                                                                                                                                                                                                                                                                                                                 |
| N | P61326 | DR | regulation of translation                                                                                                                                                                                                                                                                                                                                                                       |
| N | P61326 | DR | termination of RNA polymerase II transcription                                                                                                                                                                                                                                                                                                                                                  |
| N | P61508 | CC | Forms pore that permeabilize the cell membrane                                                                                                                                                                                                                                                                                                                                                  |
| N | P61508 | CC | May function both in the prey capture strategy as well as protection from infectious organisms arising from prey ingestion (By similarity).                                                                                                                                                                                                                                                     |
| N | P61508 | CC | Potently inhibits the growth of bacteria, yeast and Leishmania                                                                                                                                                                                                                                                                                                                                  |
| N | P61508 | CC | Promotes efflux of calcium from synaptosomes, causes hemolysis, and dissipates voltage gradients across muscle membrane                                                                                                                                                                                                                                                                         |



|   |        |    |                                                                                                                                                                                                                                                       |
|---|--------|----|-------------------------------------------------------------------------------------------------------------------------------------------------------------------------------------------------------------------------------------------------------|
| N | P61508 | DE | Lycotoxin II;                                                                                                                                                                                                                                         |
| N | P61508 | DE | Lycotoxin-2;                                                                                                                                                                                                                                          |
| N | P61508 | DE | M-LCTX-Hc2a;                                                                                                                                                                                                                                          |
| N | P61508 | DE | M-lycotoxin-Hc2a;                                                                                                                                                                                                                                     |
| N | P61508 | DR | defense response to bacterium                                                                                                                                                                                                                         |
| N | P61508 | DR | hemolysis in other organism                                                                                                                                                                                                                           |
| N | P61645 | CC | Catalyzes the polycondensation of alpha-2,8-linked sialic acid required for the synthesis of polysialic acid (PSA), which is present on the embryonic neural cell adhesion molecule (N-CAM), necessary for plasticity of neural cells (By similarity) |
| N | P61645 | DE | Alpha-2,8-sialyltransferase 8D;                                                                                                                                                                                                                       |
| N | P61645 | DE | CMP-N-acetylneuraminate-poly-alpha-2,8-sialyltransferase;                                                                                                                                                                                             |
| N | P61645 | DE | Polysialyltransferase-1;                                                                                                                                                                                                                              |
| N | P61645 | DE | Sialyltransferase 8D;                                                                                                                                                                                                                                 |
| N | P61645 | DE | Sialyltransferase St8Sia IV;                                                                                                                                                                                                                          |
| N | P61645 | DR | protein glycosylation                                                                                                                                                                                                                                 |
| N | P61662 | DE | Sugar fermentation stimulation protein homolog;<br>no specific function has so far been attributed to this initiation factor; however,                                                                                                                |
| N | P61688 | CC | it seems to stimulate more or less all the activities of the other two initiation factors IF-2 and IF-3                                                                                                                                               |
| N | P61688 | DE | Translation initiation factor IF-1;                                                                                                                                                                                                                   |
| N | P61688 | DR | translation initiation factor activity                                                                                                                                                                                                                |
| N | P62029 | CC | The glycine cleavage system catalyzes the degradation of glycine                                                                                                                                                                                      |
| N | P62029 | CC | The P protein binds the alpha-amino group of glycine through its pyridoxal phosphate cofactor; CO(2) is released and the remaining methylamine moiety is then transferred to the lipoamide cofactor of the H protein (By similarity).                 |
| N | P62029 | DE | Glycine cleavage system P-protein subunit 2;                                                                                                                                                                                                          |
| N | P62029 | DE | Glycine decarboxylase subunit 2;                                                                                                                                                                                                                      |
| N | P62029 | DE | Probable glycine dehydrogenase [decarboxylating] subunit 2;                                                                                                                                                                                           |
| N | P62029 | DR | glycine dehydrogenase (decarboxylating) activity                                                                                                                                                                                                      |
| N | P62029 | DR | oxidation-reduction process                                                                                                                                                                                                                           |
| N | P62029 | DR | pyridoxal phosphate binding                                                                                                                                                                                                                           |
| N | P62153 | CC | Calmodulin mediates the control of a large number of enzymes and other proteins by Ca(2+)                                                                                                                                                             |
| N | P62153 | CC | Among the enzymes to be stimulated by the calmodulin-Ca(2+) complex are a number of protein kinases and phosphatases.                                                                                                                                 |
| N | P62153 | DE | Calmodulin-A;                                                                                                                                                                                                                                         |
| N | P62153 | DR | calcium ion binding                                                                                                                                                                                                                                   |
| N | P62163 | CC | Calmodulin mediates the control of a large number of enzymes and other proteins by Ca(2+)                                                                                                                                                             |
| N | P62163 | CC | Among the enzymes to be stimulated by the calmodulin-Ca(2+) complex are a number of protein kinases and phosphatases.                                                                                                                                 |
| N | P62163 | DE | Calmodulin-2;                                                                                                                                                                                                                                         |
| N | P62163 | DR | calcium ion binding                                                                                                                                                                                                                                   |
| N | P62229 | DE | 30S ribosomal protein S16;                                                                                                                                                                                                                            |
| N | P62229 | DR | structural constituent of ribosome                                                                                                                                                                                                                    |
| N | P62369 | CC | Converts 4-diphosphocytidyl-2C-methyl-D-erythritol 2- phosphate into 2C-methyl-D-erythritol 2,4-cyclodiphosphate and CMP (By similarity).                                                                                                             |
| N | P62369 | DE | 2-C-methyl-D-erythritol 2,4-cyclodiphosphate synthase;                                                                                                                                                                                                |
| N | P62369 | DE | MECDP-synthase;                                                                                                                                                                                                                                       |
| N | P62369 | DR | 2-C-methyl-D-erythritol 2,4-cyclodiphosphate synthase activity                                                                                                                                                                                        |
| N | P62369 | DR | terpenoid biosynthetic process                                                                                                                                                                                                                        |
| N | P62742 | CC | Gamma chains make up the fetal hemoglobin F, in combination with alpha chains                                                                                                                                                                         |
| N | P62742 | DE | Gamma-2-globin;                                                                                                                                                                                                                                       |
| N | P62742 | DE | Hemoglobin gamma-2 chain;                                                                                                                                                                                                                             |
| N | P62742 | DE | Hemoglobin gamma-G chain;                                                                                                                                                                                                                             |
| N | P62742 | DE | Hemoglobin subunit gamma-2;                                                                                                                                                                                                                           |
| N | P62742 | DR | oxygen binding                                                                                                                                                                                                                                        |
| N | P62742 | DR | oxygen transporter activity                                                                                                                                                                                                                           |
| N | P62847 | CC | Required for processing of pre-rRNA and maturation of 40S ribosomal subunits.                                                                                                                                                                         |
| N | P62847 | DE | 40S ribosomal protein S24;                                                                                                                                                                                                                            |
| N | P62847 | DR | endocrine pancreas development                                                                                                                                                                                                                        |
| N | P62847 | DR | erythrocyte homeostasis                                                                                                                                                                                                                               |
| N | P62847 | DR | nucleotide binding                                                                                                                                                                                                                                    |
| N | P62847 | DR | rRNA processing                                                                                                                                                                                                                                       |
| N | P62847 | DR | ribosomal small subunit biogenesis                                                                                                                                                                                                                    |
| N | P62847 | DR | structural constituent of ribosome                                                                                                                                                                                                                    |

|   |        |    |                                                                                                                                                                                                                                                                     |
|---|--------|----|---------------------------------------------------------------------------------------------------------------------------------------------------------------------------------------------------------------------------------------------------------------------|
| N | P62847 | DR | translation initiation factor binding                                                                                                                                                                                                                               |
| N | P62847 | DR | translational elongation                                                                                                                                                                                                                                            |
| N | P62847 | DR | translational termination                                                                                                                                                                                                                                           |
| N | P62847 | DR | viral transcription                                                                                                                                                                                                                                                 |
| N | P62890 | DE | 60S ribosomal protein L30;                                                                                                                                                                                                                                          |
| N | P62890 | DR | structural constituent of ribosome                                                                                                                                                                                                                                  |
| N | P62924 | CC | mRNA-binding protein involved in translation elongation                                                                                                                                                                                                             |
| N | P62924 | CC | Functions as a regulator of apoptosis (By similarity).                                                                                                                                                                                                              |
| N | P62924 | CC | Has an important function at the level of mRNA turnover, probably acting downstream of decapping involved in actin dynamics and cell cycle progression, mRNA decay and probably in a pathway involved in stress response and maintenance of cell wall integrity.    |
| N | P62924 | DE | Eukaryotic translation initiation factor 5A;                                                                                                                                                                                                                        |
| N | P62924 | DR | peptidyl-lysine modification to hypusine                                                                                                                                                                                                                            |
| N | P62924 | DR | positive regulation of translational elongation                                                                                                                                                                                                                     |
| N | P62924 | DR | positive regulation of translational termination                                                                                                                                                                                                                    |
| N | P62924 | DR | ribosome binding                                                                                                                                                                                                                                                    |
| N | P62924 | DR | translation elongation factor activity                                                                                                                                                                                                                              |
| N | P62924 | DR | translational frameshifting                                                                                                                                                                                                                                         |
| N | P63028 | CC | Involved in calcium binding and microtubule stabilization (By similarity).                                                                                                                                                                                          |
| N | P63028 | DE | 21 kDa polypeptide;                                                                                                                                                                                                                                                 |
| N | P63028 | DE | Translationally-controlled tumor protein;                                                                                                                                                                                                                           |
| N | P63028 | DR | anti-apoptosis                                                                                                                                                                                                                                                      |
| N | P63028 | DR | stem cell maintenance                                                                                                                                                                                                                                               |
| N | P63028 | DR | transcription factor binding                                                                                                                                                                                                                                        |
| N | P63076 | CC | may be a signaling molecule in the induction and patterning of the embryonic brain                                                                                                                                                                                  |
| N | P63076 | DE | Fibroblast growth factor 17;                                                                                                                                                                                                                                        |
| N | P63076 | DR | growth factor activity                                                                                                                                                                                                                                              |
| N | P63259 | CC | Actins are highly conserved proteins that are involved in various types of cell motility and are ubiquitously expressed in all eukaryotic cells.                                                                                                                    |
| N | P63259 | DE | Actin, cytoplasmic 2, N-terminally processed;                                                                                                                                                                                                                       |
| N | P63259 | DE | Actin, cytoplasmic 2;                                                                                                                                                                                                                                               |
| N | P63259 | DE | Gamma-actin;                                                                                                                                                                                                                                                        |
| N | P63259 | DR | response to calcium ion                                                                                                                                                                                                                                             |
| N | P63427 | DE | Probable acyl-CoA dehydrogenase fadE25;                                                                                                                                                                                                                             |
| N | P63427 | DR | acyl-CoA dehydrogenase activity                                                                                                                                                                                                                                     |
| N | P63427 | DR | flavin adenine dinucleotide binding                                                                                                                                                                                                                                 |
| N | P63427 | DR | oxidation-reduction process                                                                                                                                                                                                                                         |
| N | P63550 | DE | Ribulokinase;                                                                                                                                                                                                                                                       |
| N | P63550 | DR | L-arabinose catabolic process                                                                                                                                                                                                                                       |
| N | P63550 | DR | ribulokinase activity                                                                                                                                                                                                                                               |
| N | P63552 | DE | Arginine deiminase;                                                                                                                                                                                                                                                 |
| N | P63552 | DE | Arginine dihydrolase;                                                                                                                                                                                                                                               |
| N | P63552 | DR | arginine catabolic process                                                                                                                                                                                                                                          |
| N | P63552 | DR | arginine deiminase activity                                                                                                                                                                                                                                         |
| N | P63602 | CC | Catalyzes the specific phosphorylation of the 3-hydroxyl group of shikimic acid using ATP as a cosubstrate (By similarity).                                                                                                                                         |
| N | P63602 | DE | Shikimate kinase 1;                                                                                                                                                                                                                                                 |
| N | P63602 | DR | aromatic amino acid family biosynthetic process                                                                                                                                                                                                                     |
| N | P63602 | DR | metal ion binding                                                                                                                                                                                                                                                   |
| N | P63602 | DR | shikimate kinase activity                                                                                                                                                                                                                                           |
| N | P63613 | DE | 5-enolpyruvylshikimate-3-phosphate phospholyase;                                                                                                                                                                                                                    |
| N | P63613 | DE | Chorismate synthase;                                                                                                                                                                                                                                                |
| N | P63613 | DR | aromatic amino acid family biosynthetic process                                                                                                                                                                                                                     |
| N | P63613 | DR | chorismate synthase activity                                                                                                                                                                                                                                        |
| N | P63658 | CC | F(1)F(0) ATP synthase produces ATP from ADP in the presence of a proton or sodium gradient during catalysis, ATP synthesis in the catalytic domain of F(1) is coupled via a rotary mechanism of the central stalk subunits to proton translocation (By similarity). |
| N | P63658 | CC | F-type ATPases consist of two structural domains, F(1) containing the extramembraneous catalytic core and F(0) containing the membrane proton channel, linked together by a central stalk and a peripheral stalk                                                    |
| N | P63658 | DE | ATP synthase F(1) sector subunit delta;                                                                                                                                                                                                                             |
| N | P63658 | DE | ATP synthase subunit delta;                                                                                                                                                                                                                                         |
| N | P63658 | DE | F-ATPase subunit delta;                                                                                                                                                                                                                                             |

|   |        |    |                                                                                                                                                                                  |
|---|--------|----|----------------------------------------------------------------------------------------------------------------------------------------------------------------------------------|
| N | P63658 | DE | F-type ATPase subunit delta;                                                                                                                                                     |
| N | P63658 | DR | ATP synthesis coupled proton transport                                                                                                                                           |
| N | P63658 | DR | hydrogen ion transporting ATP synthase activity, rotational mechanism                                                                                                            |
| N | P63701 | DE | Uncharacterized protein NMA0420;                                                                                                                                                 |
| N | P63725 | CC | Membrane-anchoring subunit of succinate dehydrogenase (SDH) (By similarity).                                                                                                     |
| N | P63725 | DE | Cytochrome b-556;                                                                                                                                                                |
| N | P63725 | DE | Succinate dehydrogenase cytochrome b556 subunit;                                                                                                                                 |
| N | P63725 | DR | electron carrier activity                                                                                                                                                        |
| N | P63725 | DR | electron transport chain                                                                                                                                                         |
| N | P63725 | DR | metal ion binding                                                                                                                                                                |
| N | P63725 | DR | succinate dehydrogenase activity                                                                                                                                                 |
| N | P63725 | DR | tricarboxylic acid cycle                                                                                                                                                         |
| N | P63843 | CC | DNA-binding protein that represses the expression of many genes that are induced as cells make the transition from rapid exponential growth to stationary phase (By similarity). |
| N | P63843 | CC | At low GTP concentration it no longer binds GTP and stop to act as a transcriptional repressor (By similarity).                                                                  |
| N | P63843 | CC | It is a GTP-binding protein that senses the intracellular GTP concentration as an indicator of nutritional limitations                                                           |
| N | P63843 | DE | GTP-sensing transcriptional pleiotropic repressor CodY;                                                                                                                          |
| N | P63843 | DR | regulation of transcription, DNA-dependent                                                                                                                                       |
| N | P63843 | DR | sequence-specific DNA binding transcription factor activity                                                                                                                      |
| N | P63843 | DR | transcription repressor activity                                                                                                                                                 |
| N | P63870 | DE | Cysteine synthase;                                                                                                                                                               |
| N | P63870 | DE | O-acetylserine (thiol)-lyase;                                                                                                                                                    |
| N | P63870 | DE | O-acetylserine sulfhydrylase;                                                                                                                                                    |
| N | P63870 | DR | cysteine biosynthetic process from serine                                                                                                                                        |
| N | P63870 | DR | cysteine synthase activity                                                                                                                                                       |
| N | P63870 | DR | pyridoxal phosphate binding                                                                                                                                                      |
| N | P63870 | DR | transferase activity                                                                                                                                                             |
| N | P63963 | CC | DNA primase is the polymerase that synthesizes small RNA primers for the Okazaki fragments on both template strands at replication forks during chromosomal DNA synthesis.       |
| N | P63963 | DE | DNA primase;                                                                                                                                                                     |
| N | P63963 | DR | DNA primase activity                                                                                                                                                             |
| N | P63963 | DR | DNA replication, synthesis of RNA primer                                                                                                                                         |
| N | P63963 | DR | zinc ion binding                                                                                                                                                                 |
| N | P64275 | CC | Necessary for efficient RNA polymerase transcription elongation past template-encoded arresting sites                                                                            |
| N | P64275 | CC | Cleavage of the nascent transcript by cleavage factors such as greA or greB allows the resumption of elongation from the new 3'terminus                                          |
| N | P64275 | CC | GreA releases sequences of 2 to 3 nucleotides (By similarity).                                                                                                                   |
| N | P64275 | CC | The arresting sites in DNA have the property of trapping a certain fraction of elongating RNA polymerases that pass through, resulting in locked ternary complexes               |
| N | P64275 | DE | Transcript cleavage factor greA;                                                                                                                                                 |
| N | P64275 | DE | Transcription elongation factor greA;                                                                                                                                            |
| N | P64275 | DR | transcription elongation regulator activity                                                                                                                                      |
| N | P64328 | CC | Catalyzes the NADPH-dependent reduction of glutamyl- tRNA(Glu) to glutamate 1-semialdehyde (GSA) (By similarity).                                                                |
| N | P64328 | DE | Glutamyl-tRNA reductase;                                                                                                                                                         |
| N | P64328 | DR | glutamyl-tRNA reductase activity                                                                                                                                                 |
| N | P64328 | DR | oxidation-reduction process                                                                                                                                                      |
| N | P64328 | DR | porphyrin biosynthetic process                                                                                                                                                   |
| N | P64328 | DR | shikimate 5-dehydrogenase activity                                                                                                                                               |
| N | P64728 | DE | Uncharacterized protein Mb0520;                                                                                                                                                  |
| N | P64954 | DE | Uncharacterized protein Mb2232;                                                                                                                                                  |
| N | P65030 | DE | Uncharacterized protein Mb2628;                                                                                                                                                  |
| N | P65098 | DE | Isocitrate dehydrogenase [NADP];                                                                                                                                                 |
| N | P65098 | DE | NADP(+)-specific ICDH;                                                                                                                                                           |
| N | P65098 | DE | Oxalosuccinate decarboxylase;                                                                                                                                                    |
| N | P65098 | DR | glyoxylate cycle                                                                                                                                                                 |
| N | P65098 | DR | isocitrate dehydrogenase (NADP+) activity                                                                                                                                        |
| N | P65098 | DR | isocitrate metabolic process                                                                                                                                                     |
| N | P65098 | DR | magnesium ion binding                                                                                                                                                            |
| N | P65098 | DR | tricarboxylic acid cycle                                                                                                                                                         |

|   |        |    |                                                                                                                                                                                                                                                                                                               |
|---|--------|----|---------------------------------------------------------------------------------------------------------------------------------------------------------------------------------------------------------------------------------------------------------------------------------------------------------------|
| N | P65110 | CC | no specific function has so far been attributed to this initiation factor; however, it seems to stimulate more or less all the activities of the other two initiation factors IF-2 and IF-3                                                                                                                   |
| N | P65110 | DE | Translation initiation factor IF-1;                                                                                                                                                                                                                                                                           |
| N | P65110 | DR | translation initiation factor activity                                                                                                                                                                                                                                                                        |
| N | P65416 | DE | Putative 3-methyladenine DNA glycosylase;                                                                                                                                                                                                                                                                     |
| N | P65416 | DR | alkylbase DNA N-glycosylase activity                                                                                                                                                                                                                                                                          |
| N | P65416 | DR | base-excision repair                                                                                                                                                                                                                                                                                          |
| N | P65439 | DE | Protein MraZ;                                                                                                                                                                                                                                                                                                 |
| N | P65462 | CC | Cell wall formation (By similarity).                                                                                                                                                                                                                                                                          |
| N | P65462 | DE | UDP-N-acetylenolpyruvoylglucosamine reductase;                                                                                                                                                                                                                                                                |
| N | P65462 | DE | UDP-N-acetylmuramate dehydrogenase;                                                                                                                                                                                                                                                                           |
| N | P65462 | DR | UDP-N-acetylmuramate dehydrogenase activity                                                                                                                                                                                                                                                                   |
| N | P65462 | DR | cell division                                                                                                                                                                                                                                                                                                 |
| N | P65462 | DR | cellular cell wall organization                                                                                                                                                                                                                                                                               |
| N | P65462 | DR | flavin adenine dinucleotide binding                                                                                                                                                                                                                                                                           |
| N | P65462 | DR | oxidation-reduction process                                                                                                                                                                                                                                                                                   |
| N | P65462 | DR | peptidoglycan biosynthetic process                                                                                                                                                                                                                                                                            |
| N | P65462 | DR | regulation of cell shape                                                                                                                                                                                                                                                                                      |
| N | P65483 | CC | Cell wall formation                                                                                                                                                                                                                                                                                           |
| N | P65483 | CC | Catalyzes the transfer of a GlcNAc subunit on undecaprenyl-pyrophosphoryl-MurNAc-pentapeptide (lipid intermediate I) to form undecaprenyl-pyrophosphoryl-MurNAc- (pentapeptide)GlcNAc (lipid intermediate II) (By similarity)                                                                                 |
| N | P65483 | DE | UDP-N-acetylglucosamine--N-acetylmuramyl-(pentapeptide) pyrophosphoryl-undecaprenol N-acetylglucosamine transferase;                                                                                                                                                                                          |
| N | P65483 | DE | Undecaprenyl-PP-MurNAc-pentapeptide-UDPGlcNAc GlcNAc transferase;                                                                                                                                                                                                                                             |
| N | P65483 | DR | UDP-N-acetyl-D-glucosamine:N-acetylmuramoyl-L-alanyl-D-glutamyl-meso-2,6-diaminopimelyl-D-alanyl-D-alanine-diphosphoundecaprenol 4-beta-N-acetylglucosaminyltransferase activity                                                                                                                              |
| N | P65483 | DR | UDP-N-acetylglactosamine biosynthetic process                                                                                                                                                                                                                                                                 |
| N | P65483 | DR | carbohydrate binding                                                                                                                                                                                                                                                                                          |
| N | P65483 | DR | cell division                                                                                                                                                                                                                                                                                                 |
| N | P65483 | DR | cellular cell wall organization                                                                                                                                                                                                                                                                               |
| N | P65483 | DR | lipid glycosylation                                                                                                                                                                                                                                                                                           |
| N | P65483 | DR | peptidoglycan biosynthetic process                                                                                                                                                                                                                                                                            |
| N | P65483 | DR | regulation of cell shape                                                                                                                                                                                                                                                                                      |
| N | P65483 | DR | undecaprenyldiphospho-muramoylpentapeptide beta-N-acetylglucosaminyltransferase activity                                                                                                                                                                                                                      |
| N | P65492 | CC | This protein is involved in the repair of mismatches in DNA                                                                                                                                                                                                                                                   |
| N | P65492 | CC | It is required for dam-dependent methyl-directed DNA mismatch repair may act as a 'molecular matchmaker', a protein that promotes the formation of a stable complex between two or more DNA-binding proteins in an ATP-dependent manner without itself being part of a final effector complex (By similarity) |
| N | P65492 | CC |                                                                                                                                                                                                                                                                                                               |
| N | P65492 | DE | DNA mismatch repair protein mutL;                                                                                                                                                                                                                                                                             |
| N | P65492 | DR | mismatch repair                                                                                                                                                                                                                                                                                               |
| N | P65492 | DR | mismatched DNA binding                                                                                                                                                                                                                                                                                        |
| N | P65621 | DE | Aspartate carbamoyltransferase;                                                                                                                                                                                                                                                                               |
| N | P65621 | DE | Aspartate transcarbamylase;                                                                                                                                                                                                                                                                                   |
| N | P65621 | DR | 'de novo' pyrimidine base biosynthetic process                                                                                                                                                                                                                                                                |
| N | P65621 | DR | amino acid binding                                                                                                                                                                                                                                                                                            |
| N | P65621 | DR | aspartate carbamoyltransferase activity                                                                                                                                                                                                                                                                       |
| N | P65621 | DR | cellular amino acid metabolic process                                                                                                                                                                                                                                                                         |
| N | P65621 | DR | pyrimidine nucleotide biosynthetic process                                                                                                                                                                                                                                                                    |
| N | P65840 | CC | Responsible for synthesis of pseudouridine from uracil- 516 in 16S ribosomal RNA (By similarity).                                                                                                                                                                                                             |
| N | P65840 | DE | 16S pseudouridine 516 synthase;                                                                                                                                                                                                                                                                               |
| N | P65840 | DE | 16S pseudouridylylate 516 synthase;                                                                                                                                                                                                                                                                           |
| N | P65840 | DE | Ribosomal small subunit pseudouridine synthase A;                                                                                                                                                                                                                                                             |
| N | P65840 | DE | rRNA pseudouridylylate synthase A;                                                                                                                                                                                                                                                                            |
| N | P65840 | DE | rRNA-uridine isomerase A;                                                                                                                                                                                                                                                                                     |
| N | P65840 | DR | pseudouridine synthase activity                                                                                                                                                                                                                                                                               |
| N | P65840 | DR | pseudouridine synthesis                                                                                                                                                                                                                                                                                       |
| N | P65840 | DR | rRNA processing                                                                                                                                                                                                                                                                                               |
| N | P65921 | CC | Catalyzes the ATP-dependent amination of UTP to CTP with either L-glutamine or ammonia as the source of nitrogen (By similarity).                                                                                                                                                                             |
| N | P65921 | DE | CTP synthase;                                                                                                                                                                                                                                                                                                 |

|   |        |    |                                                                                                                                                                                                               |
|---|--------|----|---------------------------------------------------------------------------------------------------------------------------------------------------------------------------------------------------------------|
| N | P65921 | DE | CTP synthetase;                                                                                                                                                                                               |
| N | P65921 | DE | UTP--ammonia ligase;                                                                                                                                                                                          |
| N | P65921 | DR | CTP synthase activity                                                                                                                                                                                         |
| N | P65921 | DR | glutamine metabolic process                                                                                                                                                                                   |
| N | P65921 | DR | pyrimidine nucleotide biosynthetic process                                                                                                                                                                    |
| N | P65948 | CC | Transfers and isomerizes the ribose moiety from AdoMet to the 7-aminomethyl group of 7-deazaguanine (preQ1-tRNA) to give epoxyqueuosine (oQ-tRNA) (By similarity).                                            |
| N | P65948 | DE | Queuosine biosynthesis protein queA;                                                                                                                                                                          |
| N | P65948 | DE | S-adenosylmethionine:tRNA ribosyltransferase-isomerase;                                                                                                                                                       |
| N | P65948 | DR | isomerase activity                                                                                                                                                                                            |
| N | P65948 | DR | queuosine biosynthetic process                                                                                                                                                                                |
| N | P65948 | DR | transferase activity                                                                                                                                                                                          |
| N | P66094 | CC | Binds directly to 23S rRNA                                                                                                                                                                                    |
| N | P66094 | CC | The L1 stalk is quite mobile in the ribosome, and is involved in E site tRNA release (By similarity).                                                                                                         |
| N | P66094 | DE | 50S ribosomal protein L1;                                                                                                                                                                                     |
| N | P66094 | DR | RNA processing                                                                                                                                                                                                |
| N | P66094 | DR | regulation of translation                                                                                                                                                                                     |
| N | P66094 | DR | structural constituent of ribosome                                                                                                                                                                            |
| N | P66099 | CC | Binds directly to 23S rRNA                                                                                                                                                                                    |
| N | P66099 | CC | The L1 stalk is quite mobile in the ribosome, and is involved in E site tRNA release (By similarity).                                                                                                         |
| N | P66099 | DE | 50S ribosomal protein L1;                                                                                                                                                                                     |
| N | P66099 | DR | RNA processing                                                                                                                                                                                                |
| N | P66099 | DR | regulation of translation                                                                                                                                                                                     |
| N | P66099 | DR | structural constituent of ribosome                                                                                                                                                                            |
| N | P66258 | DE | 50S ribosomal protein L34;                                                                                                                                                                                    |
| N | P66258 | DR | structural constituent of ribosome                                                                                                                                                                            |
| N | P66333 | CC | Involved in the binding of tRNA to the ribosomes (By similarity).                                                                                                                                             |
| N | P66333 | DE | 30S ribosomal protein S10;                                                                                                                                                                                    |
| N | P66333 | DR | structural constituent of ribosome                                                                                                                                                                            |
| N | P66361 | CC | Located on the platform of the 30S subunit, it bridges several disparate RNA helices of the 16S rRNA                                                                                                          |
| N | P66361 | CC | Forms part of the Shine-Dalgarno cleft in the 70S ribosome (By similarity).                                                                                                                                   |
| N | P66361 | DE | 30S ribosomal protein S11;                                                                                                                                                                                    |
| N | P66361 | DR | structural constituent of ribosome                                                                                                                                                                            |
| N | P66407 | CC | Binds 16S rRNA, required for the assembly of 50S particles and may also be responsible for determining the conformation of the 16S rRNA at the A site (By similarity).                                        |
| N | P66407 | DE | 30S ribosomal protein S14;                                                                                                                                                                                    |
| N | P66407 | DR | structural constituent of ribosome                                                                                                                                                                            |
| N | P66520 | DE | 30S ribosomal protein S21;                                                                                                                                                                                    |
| N | P66520 | DR | structural constituent of ribosome                                                                                                                                                                            |
| N | P66749 | CC | The ruvA-ruvB complex in the presence of ATP renatures cruciform structure in supercoiled DNA with palindromic sequence, indicating that it may promote strand exchange reactions in homologous recombination |
| N | P66749 | CC | RuvA stimulates, in the presence of DNA, the weak ATPase activity of ruvB (By similarity).                                                                                                                    |
| N | P66749 | CC | RuvAB is an helicase that mediates the Holliday junction migration by localized denaturation and reannealing                                                                                                  |
| N | P66749 | DE | Holliday junction ATP-dependent DNA helicase ruvA;                                                                                                                                                            |
| N | P66749 | DR | DNA recombination                                                                                                                                                                                             |
| N | P66749 | DR | four-way junction helicase activity                                                                                                                                                                           |
| N | P66764 | CC | Catalyzes the formation of S-adenosylmethionine from methionine and ATP                                                                                                                                       |
| N | P66764 | CC | The overall synthetic reaction is composed of two sequential steps, AdoMet formation and the subsequent triphosphatase hydrolysis which occurs prior to release of AdoMet from the enzyme (By similarity).    |
| N | P66764 | DE | AdoMet synthase;                                                                                                                                                                                              |
| N | P66764 | DE | Methionine adenosyltransferase;                                                                                                                                                                               |
| N | P66764 | DE | S-adenosylmethionine synthase;                                                                                                                                                                                |
| N | P66764 | DR | metal ion binding                                                                                                                                                                                             |
| N | P66764 | DR | methionine adenosyltransferase activity                                                                                                                                                                       |
| N | P66764 | DR | one-carbon metabolic process                                                                                                                                                                                  |
| N | P66810 | CC | Sigma factors are initiation factors that promote the attachment of RNA polymerase to specific initiation sites and are then released (By similarity).                                                        |
| N | P66810 | DE | Probable RNA polymerase sigma-C factor;                                                                                                                                                                       |

|   |        |    |                                                                                                                                                                                                     |
|---|--------|----|-----------------------------------------------------------------------------------------------------------------------------------------------------------------------------------------------------|
| N | P66810 | DR | regulation of transcription, DNA-dependent                                                                                                                                                          |
| N | P66810 | DR | sequence-specific DNA binding transcription factor activity                                                                                                                                         |
| N | P66810 | DR | sigma factor activity                                                                                                                                                                               |
| N | P66810 | DR | transcription initiation, DNA-dependent                                                                                                                                                             |
| N | P66858 | CC | Binds specifically to the ssrA RNA (tmRNA) and is required for stable association of ssrA with ribosomes (By similarity).                                                                           |
| N | P66858 | DE | SsrA-binding protein;                                                                                                                                                                               |
| N | P66889 | CC | Required for correct localization of precursor proteins bearing signal peptides with the twin arginine conserved motif S/T-R-R-X-F-L-K                                                              |
| N | P66889 | CC | This sec-independent pathway is termed TAT for twin-arginine translocation system                                                                                                                   |
| N | P66889 | CC | This system mainly transports proteins with bound cofactors that require folding prior to export (By similarity).                                                                                   |
| N | P66889 | DE | Sec-independent protein translocase protein tatA/E homolog;                                                                                                                                         |
| N | P66889 | DR | protein secretion                                                                                                                                                                                   |
| N | P66889 | DR | protein transporter activity                                                                                                                                                                        |
| N | P66889 | DR | transmembrane transport                                                                                                                                                                             |
| N | P67093 | DE | Universal stress protein G;                                                                                                                                                                         |
| N | P67093 | DR | response to stress                                                                                                                                                                                  |
| N | P67172 | DE | UPF0079 ATP-binding protein Mb3456c;                                                                                                                                                                |
| N | P67174 | DE | UPF0082 protein BR1717;                                                                                                                                                                             |
| N | P67216 | CC | Required for maturation of 30S ribosomal subunits (By similarity).                                                                                                                                  |
| N | P67216 | DE | Ribosome maturation factor rimP;                                                                                                                                                                    |
| N | P67216 | DR | ribosome biogenesis                                                                                                                                                                                 |
| N | P67220 | CC | Required for maturation of 30S ribosomal subunits (By similarity).                                                                                                                                  |
| N | P67220 | DE | Ribosome maturation factor rimP;                                                                                                                                                                    |
| N | P67220 | DR | ribosome biogenesis                                                                                                                                                                                 |
| N | P67399 | CC | Catalyzes the conversion of uracil and 5-phospho-alpha- D-ribose 1-diphosphate (PRPP) to UMP and diphosphate (By similarity).                                                                       |
| N | P67399 | DE | UMP pyrophosphorylase;                                                                                                                                                                              |
| N | P67399 | DE | Uracil phosphoribosyltransferase;                                                                                                                                                                   |
| N | P67399 | DR | nucleoside metabolic process                                                                                                                                                                        |
| N | P67399 | DR | uracil phosphoribosyltransferase activity                                                                                                                                                           |
| N | P67399 | DR | uracil salvage                                                                                                                                                                                      |
| N | P67591 | DE | Tryptophan--tRNA ligase;                                                                                                                                                                            |
| N | P67591 | DE | Tryptophanyl-tRNA synthetase;                                                                                                                                                                       |
| N | P67591 | DR | tryptophan-tRNA ligase activity                                                                                                                                                                     |
| N | P67591 | DR | tryptophanyl-tRNA aminoacylation                                                                                                                                                                    |
| N | P67595 | DE | Tryptophan--tRNA ligase;                                                                                                                                                                            |
| N | P67595 | DE | Tryptophanyl-tRNA synthetase;                                                                                                                                                                       |
| N | P67595 | DR | tryptophan-tRNA ligase activity                                                                                                                                                                     |
| N | P67595 | DR | tryptophanyl-tRNA aminoacylation                                                                                                                                                                    |
| N | P67640 | DE | UPF0735 ACT domain-containing protein SAV1643;                                                                                                                                                      |
| N | P67640 | DR | L-phenylalanine biosynthetic process                                                                                                                                                                |
| N | P67865 | CC | Plays critical roles in virus replication, from virus entry and uncoating to assembly and budding of the virus particle                                                                             |
| N | P67865 | CC | During virus entry into cell, the M2 ion channel acidifies the internal virion core, inducing M1 dissociation from the RNP                                                                          |
| N | P67865 | CC | Forms a continuous shell on the inner side of the lipid bilayer in virion, where it binds the RNP                                                                                                   |
| N | P67865 | CC | Interaction of viral NEP with M1-RNP is thought to promote nuclear export of the complex, which is targeted to the virion assembly site at the apical plasma membrane in polarized epithelial cells |
| N | P67865 | CC | Interactions with NA and PA may bring M1, a non-rant-associated protein, into viri binding to mononucleocapsids (RNPs) in nucleus seems to inhibit viral transcription                              |
| N | P67865 | CC | M1-free RNPs are transported to the nucleus, where viral transcription and replication can take place (By similarity).                                                                              |
| N | P67865 | DE | Matrix protein 1;                                                                                                                                                                                   |
| N | P67865 | DR | evasion by virus of host immune response                                                                                                                                                            |
| N | P67865 | DR | structural molecule activity                                                                                                                                                                        |
| N | P68193 | CC | Although this protein associates with the 30S subunit of the ribosome it is not considered to be a bona fide ribosomal protein (By similarity).                                                     |
| N | P68193 | DE | 30S ribosomal protein S22;                                                                                                                                                                          |
| N | P68193 | DE | Stationary-phase-induced ribosome-associated protein;                                                                                                                                               |
| N | P68193 | DR | structural constituent of ribosome                                                                                                                                                                  |

|   |        |    |                                                                                                                                                                                   |
|---|--------|----|-----------------------------------------------------------------------------------------------------------------------------------------------------------------------------------|
| N | P68248 | CC | Pancreatic hormone is synthesized in pancreatic islets of Langerhans and acts as a regulator of pancreatic and gastrointestinal functions.                                        |
| N | P68248 | DE | Pancreatic hormone;                                                                                                                                                               |
| N | P68248 | DE | Pancreatic polypeptide;                                                                                                                                                           |
| N | P68248 | DR | hormone activity                                                                                                                                                                  |
| N | P68302 | CC | metallothioneins have a high content of cysteine residues that bind various heavy metals; these proteins are transcriptionally regulated by both heavy metals and glucocorticoids |
| N | P68302 | DE | Metallothionein-2;                                                                                                                                                                |
| N | P68302 | DE | Metallothionein-II;                                                                                                                                                               |
| N | P68302 | DR | metal ion binding                                                                                                                                                                 |
| N | P68384 | DR | serine-type endopeptidase inhibitor activity                                                                                                                                      |
| N | P68531 | CC | Subunits I, II and III form the functional core of the enzyme complex.                                                                                                            |
| N | P68531 | DE | Cytochrome c oxidase polypeptide III;                                                                                                                                             |
| N | P68531 | DE | Cytochrome c oxidase subunit 3;                                                                                                                                                   |
| N | P68531 | DR | cytochrome-c oxidase activity                                                                                                                                                     |
| N | P68531 | DR | mitochondrial electron transport, cytochrome c to oxygen                                                                                                                          |
| N | P69148 | CC | Myoactive; cardioexcitatory substance                                                                                                                                             |
| N | P69148 | CC | Pharmacological activities include augmentation, induction, and regularization of cardiac contraction.                                                                            |
| N | P69148 | DR | neuropeptide signaling pathway                                                                                                                                                    |
| N | P69239 | CC | Core subunit of the mitochondrial membrane respiratory chain NADH dehydrogenase (Complex I) that is believed to belong to the minimal assembly                                    |
| N | P69239 | CC | Complex I participates in the transfer of electrons from NADH to the respiratory chain                                                                                            |
| N | P69239 | CC | The immediate electron acceptor for the enzyme is believed to be ubiquinone (By similarity).                                                                                      |
| N | P69239 | DE | NADH dehydrogenase subunit 4L;                                                                                                                                                    |
| N | P69239 | DE | NADH-ubiquinone oxidoreductase chain 4L;                                                                                                                                          |
| N | P69239 | DR | ATP synthesis coupled electron transport                                                                                                                                          |
| N | P69239 | DR | NADH dehydrogenase (ubiquinone) activity                                                                                                                                          |
| N | P69289 | CC | Encapsidates the negative strand viral RNA, protecting it from nucleases                                                                                                          |
| N | P69289 | CC | Dissociation of M1 from RNP unmask nucleoprotein's nuclear localization signals, targeting the RNP to the nucleus (By similarity).                                                |
| N | P69289 | CC | It is possible that the nucleoprotein binds directly exportin-1 (XPO1) and plays an active role in RNP nuclear export                                                             |
| N | P69289 | CC | Later in the infection, nucleus export of RNP are mediated through viral proteins                                                                                                 |
| N | P69289 | CC | NEP interacting with M1 which binds nucleoproteins                                                                                                                                |
| N | P69289 | CC | M1 interaction with RNP seems to hide nucleoprotein's nuclear localization                                                                                                        |
| N | P69289 | CC | RNP comprises at least 2 nuclear localization signals and is responsible for the active RNP import into the nucleus through the cellular importin alpha/beta pathway              |
| N | P69289 | CC | Soon after a virion infects a new cell, M1 dissociates from the RNP under acidification of the virion driven by M2 protein                                                        |
| N | P69289 | CC | The RNP needs to be localized in the nucleus to start an infectious cycle, but is too large to diffuse through the nuclear pore complex                                           |
| N | P69289 | CC | The encapsidated genomic RNA is termed the ribonucleoprotein (RNP) and serves as template for transcription and replication                                                       |
| N | P69289 | DE | Nucleocapsid protein;                                                                                                                                                             |
| N | P69289 | DE | Nucleoprotein;                                                                                                                                                                    |
| N | P69289 | DR | interspecies interaction between organisms                                                                                                                                        |
| N | P69289 | DR | structural molecule activity                                                                                                                                                      |
| N | P69361 | CC | The VP7 protein is one of the five proteins (with VP1, VP3, VP4, and VP6) which form the inner capsid of the virus.                                                               |
| N | P69361 | DE | Core protein VP7;                                                                                                                                                                 |
| N | P69361 | DR | host cell surface receptor binding                                                                                                                                                |
| N | P69361 | DR | structural molecule activity                                                                                                                                                      |
| N | P69361 | DR | viral envelope fusion with host membrane                                                                                                                                          |
| N | P69406 | CC | Positive regulator of capsular polysaccharide synthesis                                                                                                                           |
| N | P69406 | CC | RcsA and rcsB form a complex to promote transcription of the genes for capsule synthesis (By similarity).                                                                         |
| N | P69406 | DE | Colanic acid capsular biosynthesis activation protein A;                                                                                                                          |
| N | P69406 | DR | regulation of transcription, DNA-dependent                                                                                                                                        |
| N | P69406 | DR | sequence-specific DNA binding                                                                                                                                                     |
| N | P69406 | DR | sequence-specific DNA binding transcription factor activity                                                                                                                       |
| N | P69406 | DR | two-component response regulator activity                                                                                                                                         |
| N | P69423 | CC | Required for correct localization of precursor proteins bearing signal peptides with the twin arginine conserved motif S/T-R-R-X-F-L-K                                            |

|   |        |    |                                                                                                                                                                                                                                                          |
|---|--------|----|----------------------------------------------------------------------------------------------------------------------------------------------------------------------------------------------------------------------------------------------------------|
| N | P69423 | CC | This sec-independent pathway is termed TAT for twin-arginine translocation system                                                                                                                                                                        |
| N | P69423 | CC | This system mainly transports proteins with bound cofactors that require folding prior to export (By similarity).                                                                                                                                        |
| N | P69423 | DE | Sec-independent protein translocase protein tatC;                                                                                                                                                                                                        |
| N | P69423 | DR | intracellular protein transmembrane transport                                                                                                                                                                                                            |
| N | P69423 | DR | proton motive force dependent protein transmembrane transporter activity                                                                                                                                                                                 |
| N | P69475 | DE | Coat protein;                                                                                                                                                                                                                                            |
| N | P69475 | DR | structural molecule activity                                                                                                                                                                                                                             |
| N | P69505 | CC | Di-iron-containing protein involved in the repair of iron-sulfur clusters damaged by oxidative and nitrosative stress conditions (By similarity).                                                                                                        |
| N | P69505 | DE | Iron-sulfur cluster repair protein YtfE;                                                                                                                                                                                                                 |
| N | P69505 | DR | metal ion binding                                                                                                                                                                                                                                        |
| N | P69505 | DR | response to stress                                                                                                                                                                                                                                       |
| N | P69625 | DE | Uncharacterized 9.7 kDa protein in cox-rep intergenic region;                                                                                                                                                                                            |
| N | P69686 | CC | One of the two reaction center proteins of photosystem II (PSII), D2 is needed for assembly of a stable PSII complex (By similarity).                                                                                                                    |
| N | P69686 | DE | PSII D2 protein;                                                                                                                                                                                                                                         |
| N | P69686 | DE | Photosystem II D2 protein;                                                                                                                                                                                                                               |
| N | P69686 | DE | Photosystem Q(A) protein;                                                                                                                                                                                                                                |
| N | P69686 | DR | electron transporter, transferring electrons within the cyclic electron transport pathway of photosynthesis activity                                                                                                                                     |
| N | P69686 | DR | metal ion binding                                                                                                                                                                                                                                        |
| N | P69686 | DR | photosynthetic electron transport in photosystem II                                                                                                                                                                                                      |
| N | P69733 | CC | Escorts unspliced or incompletely spliced viral pre- mRNAs (late transcripts) out of the nucleus of infected cells                                                                                                                                       |
| N | P69733 | CC | These pre-mRNAs carry a recognition sequence called Rev responsive element (RRE) located in the env gene, that is not present in fully spliced viral mRNAs (early transcripts)                                                                           |
| N | P69733 | CC | This function is essential since most viral proteins are translated from unspliced or partially spliced pre-mRNAs which cannot exit the nucleus by the pathway used by fully processed cellular mRNAs (By similarity).                                   |
| N | P69733 | DE | Protein Rev;                                                                                                                                                                                                                                             |
| N | P69733 | DE | Regulator of expression of viral proteins;                                                                                                                                                                                                               |
| N | P69733 | DR | mRNA transport                                                                                                                                                                                                                                           |
| N | P69733 | DR | regulation of transcription, DNA-dependent                                                                                                                                                                                                               |
| N | P69733 | DR | sequence-specific DNA binding transcription factor activity                                                                                                                                                                                              |
| N | P69733 | DR | specific transcriptional repressor activity                                                                                                                                                                                                              |
| N | P69749 | CC | Delta-conotoxins bind to site 6 of voltage-gated sodium channels and inhibit the inactivation process (By similarity).                                                                                                                                   |
| N | P69749 | DE | Delta-BVIA;                                                                                                                                                                                                                                              |
| N | P69749 | DE | Delta-conotoxin-like BVIA;                                                                                                                                                                                                                               |
| N | P69749 | DR | sodium channel inhibitor activity                                                                                                                                                                                                                        |
| N | P69798 | CC | The phosphoenolpyruvate-dependent sugar phosphotransferase system (sugar PTS), a major carbohydrate active -transport system, catalyzes the phosphorylation of incoming sugar substrates concomitantly with their translocation across the cell membrane |
| N | P69798 | CC | This system is involved in mannose transport (By similarity).                                                                                                                                                                                            |
| N | P69798 | DE | Mannose-specific phosphotransferase enzyme IIA component;                                                                                                                                                                                                |
| N | P69798 | DE | Mannose-specific phosphotransferase enzyme IIB component;                                                                                                                                                                                                |
| N | P69798 | DE | PTS system mannose-specific EIIB component;                                                                                                                                                                                                              |
| N | P69798 | DE | PTS system mannose-specific EIIB component;                                                                                                                                                                                                              |
| N | P69798 | DE | PTS system mannose-specific EIIB component;                                                                                                                                                                                                              |
| N | P69798 | DR | kinase activity                                                                                                                                                                                                                                          |
| N | P69798 | DR | phosphoenolpyruvate-dependent sugar phosphotransferase system                                                                                                                                                                                            |
| N | P69798 | DR | protein-N(P)-phosphohistidine-sugar phosphotransferase activity                                                                                                                                                                                          |
| N | P69887 | DE | Triose-phosphate isomerase;                                                                                                                                                                                                                              |
| N | P69887 | DE | Triosephosphate isomerase;                                                                                                                                                                                                                               |
| N | P69887 | DR | gluconeogenesis                                                                                                                                                                                                                                          |
| N | P69887 | DR | pentose-phosphate shunt                                                                                                                                                                                                                                  |
| N | P69887 | DR | triose-phosphate isomerase activity                                                                                                                                                                                                                      |
| N | P69891 | CC | Gamma chains make up the beta hemoglobin F, in combination with alpha chains                                                                                                                                                                             |
| N | P69891 | DE | Gamma-1-globin;                                                                                                                                                                                                                                          |
| N | P69891 | DE | Hb F Agamma;                                                                                                                                                                                                                                             |
| N | P69891 | DE | Hemoglobin gamma-1 chain;                                                                                                                                                                                                                                |
| N | P69891 | DE | Hemoglobin gamma-A chain;                                                                                                                                                                                                                                |
| N | P69891 | DE | Hemoglobin subunit gamma-1;                                                                                                                                                                                                                              |
| N | P69891 | DR | blood coagulation                                                                                                                                                                                                                                        |



|   |        |    |                                                                                                                                                 |
|---|--------|----|-------------------------------------------------------------------------------------------------------------------------------------------------|
| N | P69891 | DR | oxygen binding                                                                                                                                  |
| N | P69891 | DR | oxygen transporter activity                                                                                                                     |
| N | P69891 | DR | protein binding                                                                                                                                 |
| N | P70182 | CC | Participates in the biosynthesis of phosphatidylinositol-4,5-bisphosphate                                                                       |
| N | P70182 | CC | Acts as an activator of TUT1 adenylyltransferase activity in nuclear speckles, thereby regulating mRNA polyadenylation of a select set of mRNAs |
| N | P70182 | CC | Contributes to the activation of PLD2.                                                                                                          |
| N | P70182 | CC | Mediates RAC1-dependent reorganization of actin filaments                                                                                       |
| N | P70182 | DE | 68 kDa type I phosphatidylinositol-4-phosphate 5-kinase;                                                                                        |
| N | P70182 | DE | PI4P5K1beta;                                                                                                                                    |
| N | P70182 | DE | PIP5K1-alpha;                                                                                                                                   |
| N | P70182 | DE | PIP5K1alpha;                                                                                                                                    |
| N | P70182 | DE | Phosphatidylinositol-4-phosphate 5-kinase type I alpha;                                                                                         |
| N | P70182 | DE | Phosphatidylinositol-4-phosphate 5-kinase type I beta;                                                                                          |
| N | P70182 | DE | Phosphatidylinositol-4-phosphate 5-kinase type-I alpha;                                                                                         |
| N | P70182 | DE | PtdIns(4)P-5-kinase 1 alpha;                                                                                                                    |
| N | P70182 | DR | 1-phosphatidylinositol-4-phosphate 5-kinase activity                                                                                            |
| N | P70182 | DR | fibroblast migration                                                                                                                            |
| N | P70423 | CC | Mediates the uptake of the cationic amino acids arginine, lysine and ornithine in a sodium-independent manner.                                  |
| N | P70423 | DE | Cationic amino acid transporter 3;                                                                                                              |
| N | P70423 | DE | Cationic amino acid transporter y+;                                                                                                             |
| N | P70423 | DE | Solute carrier family 7 member 3;                                                                                                               |
| N | P70423 | DR | L-lysine transmembrane transporter activity                                                                                                     |
| N | P70423 | DR | arginine transmembrane transporter activity                                                                                                     |
| N | P70423 | DR | cationic amino acid transmembrane transporter activity                                                                                          |
| N | P70668 | CC | Endogenous activator of intestinal guanylate cyclase                                                                                            |
| N | P70668 | CC | It stimulates this enzyme through the same receptor binding region as the heat-stable enterotoxins                                              |
| N | P70668 | CC | may be a potent physiological regulator of intestinal fluid and electrolyte transport                                                           |
| N | P70668 | CC | May be an autocrine/paracrine regulator of intestinal salt and water transport.                                                                 |
| N | P70668 | DE | Guanylate cyclase activator 2B;                                                                                                                 |
| N | P70668 | DE | Uroguanylin;                                                                                                                                    |
| N | P70668 | DR | enzyme activator activity                                                                                                                       |
| N | P70668 | DR | ion homeostasis                                                                                                                                 |
| N | P70668 | DR | regulation of cyclic nucleotide biosynthetic process                                                                                            |
| N | P70668 | DR | water homeostasis                                                                                                                               |
| N | P70901 | CC | The vlp and vsp proteins are antigenically distinct proteins, only one vlp or vsp gene is transcriptionally active at any one time              |
| N | P70901 | CC | Switching between these genes is a mechanism of host immune reponse evasion.                                                                    |
| N | P70901 | DE | Variable large protein 12;                                                                                                                      |
| N | P71381 | DE | Anthranilate synthase component II;                                                                                                             |
| N | P71381 | DE | Glutamine amido-transferase;                                                                                                                    |
| N | P71381 | DR | anthranilate synthase activity                                                                                                                  |
| N | P71381 | DR | glutamine metabolic process                                                                                                                     |
| N | P71381 | DR | tryptophan biosynthetic process                                                                                                                 |
| N | P71724 | DE | Phosphoglyceromutase;                                                                                                                           |
| N | P71724 | DE | Uncharacterized phosphoglycerate mutase family protein Rv2419c;                                                                                 |
| N | P71724 | DR | isomerase activity                                                                                                                              |
| N | P71955 | DE | Uncharacterized protein Rv2658c/MT2734.1;                                                                                                       |
| N | P72255 | DE | UPF0758 protein;                                                                                                                                |
| N | P72830 | DE | 6-phosphofructokinase 1;                                                                                                                        |
| N | P72830 | DE | Phosphofructokinase 1;                                                                                                                          |
| N | P72830 | DE | Phosphohexokinase 1;                                                                                                                            |
| N | P72830 | DR | 6-phosphofructokinase activity                                                                                                                  |
| N | P72830 | DR | fructose 6-phosphate metabolic process                                                                                                          |
| N | P72830 | DR | metal ion binding                                                                                                                               |
| N | P72848 | CC | Key enzyme in heme biosynthesis                                                                                                                 |
| N | P72848 | CC | Catalyzes the oxidative decarboxylation of propionic acid side chains of rings A and B of coproporphyrinogen III (By similarity).               |
| N | P72848 | DE | Coprogen oxidase;                                                                                                                               |
| N | P72848 | DE | Coproporphyrinogen-III oxidase, aerobic;                                                                                                        |
| N | P72848 | DE | Coproporphyrinogenase;                                                                                                                          |
| N | P72848 | DR | coproporphyrinogen oxidase activity                                                                                                             |
| N | P72848 | DR | oxidation-reduction process                                                                                                                     |

|   |        |    |                                                                                                                                                              |
|---|--------|----|--------------------------------------------------------------------------------------------------------------------------------------------------------------|
| N | P72848 | DR | porphyrin biosynthetic process                                                                                                                               |
| N | P72848 | DR | protein homodimerization activity                                                                                                                            |
| N | P73056 | DE | Uncharacterized monothiol glutaredoxin ycf64-like;                                                                                                           |
| N | P73056 | DR | 2 iron, 2 sulfur cluster binding                                                                                                                             |
| N | P73056 | DR | cell redox homeostasis                                                                                                                                       |
| N | P73056 | DR | electron carrier activity                                                                                                                                    |
| N | P73056 | DR | metal ion binding                                                                                                                                            |
| N | P73056 | DR | protein disulfide oxidoreductase activity                                                                                                                    |
| N | P73161 | CC | Catalyzes the formation of N(7)-methylguanine at position 46 (m7G46) in tRNA (By similarity).                                                                |
| N | P73161 | DE | tRNA (guanine-N(7)-)-methyltransferase;                                                                                                                      |
| N | P73161 | DE | tRNA(m7G46)-methyltransferase;                                                                                                                               |
| N | P73161 | DR | tRNA (guanine-N7-)-methyltransferase activity                                                                                                                |
| N | P73320 | CC | One of the primary rRNA binding proteins, it binds directly near the 3'-end of the 23S rRNA, where it nucleates assembly of the 50S subunit (By similarity). |
| N | P73320 | DE | 50S ribosomal protein L3;                                                                                                                                    |
| N | P73320 | DR | structural constituent of ribosome                                                                                                                           |
| N | P73859 | DE | KaiB-like protein 1;                                                                                                                                         |
| N | P73859 | DR | rhythmic process                                                                                                                                             |
| N | P74267 | DE | 50S ribosomal protein L27;                                                                                                                                   |
| N | P74267 | DR | structural constituent of ribosome                                                                                                                           |
| N | P74794 | DE | UPF0150 protein ssl0738;                                                                                                                                     |
| N | P74857 | DE | Probable secretion system apparatus ATP synthase SsaN;                                                                                                       |
| N | P74857 | DR | ATP biosynthetic process                                                                                                                                     |
| N | P74857 | DR | protein secretion by the type III secretion system                                                                                                           |
| N | P74857 | DR | proton-transporting ATPase activity, rotational mechanism                                                                                                    |
| N | P74921 | CC | Acts on leucine, isoleucine and valine (By similarity).                                                                                                      |
| N | P74921 | DE | Probable branched-chain-amino-acid aminotransferase;                                                                                                         |
| N | P74921 | DR | L-isoleucine transaminase activity                                                                                                                           |
| N | P74921 | DR | L-leucine transaminase activity                                                                                                                              |
| N | P74921 | DR | L-valine transaminase activity                                                                                                                               |
| N | P74921 | DR | branched chain family amino acid biosynthetic process                                                                                                        |
| N | P75084 | DE | Uncharacterized protein MG027 homolog;                                                                                                                       |
| N | P75084 | DR | regulation of transcription, DNA-dependent                                                                                                                   |
| N | P75150 | DE | Uncharacterized lipoprotein MG439 homolog 1;                                                                                                                 |
| N | P75452 | DE | Uncharacterized protein MPN_110;                                                                                                                             |
| N | P75452 | DR | hydrolase activity                                                                                                                                           |
| N | P75452 | DR | identical protein binding                                                                                                                                    |
| N | P75684 | DE | Uncharacterized protein yagP;                                                                                                                                |
| N | P75933 | CC | Involved in the assembly process of the P-ring formation                                                                                                     |
| N | P75933 | CC | It may associate with flgF on the rod constituting a structure essential for the P-ring assembly or may act as a modulator protein for the P-ring assembly.  |
| N | P75933 | DE | Flagella basal body P-ring formation protein flgA;                                                                                                           |
| N | P75933 | DR | ciliary or flagellar motility                                                                                                                                |
| N | P75933 | DR | flagellum organization                                                                                                                                       |
| N | P78406 | CC | Binds mRNA                                                                                                                                                   |
| N | P78406 | CC | May function in nucleocytoplasmic transport and in directly or indirectly attaching cytoplasmic mRNPs to the cytoskeleton.                                   |
| N | P78406 | DE | Rae1 protein homolog;                                                                                                                                        |
| N | P78406 | DE | mRNA export factor;                                                                                                                                          |
| N | P78406 | DE | mRNA-associated protein mrnp 41;                                                                                                                             |
| N | P78406 | DR | carbohydrate metabolic process                                                                                                                               |
| N | P78406 | DR | glucose transport                                                                                                                                            |
| N | P78406 | DR | mRNA export from nucleus                                                                                                                                     |
| N | P78406 | DR | microtubule binding                                                                                                                                          |
| N | P78406 | DR | regulation of glucose transport                                                                                                                              |
| N | P78406 | DR | transmembrane transport                                                                                                                                      |
| N | P78406 | DR | viral reproduction                                                                                                                                           |
| N | P78556 | CC | Chemotactic factor that attracts lymphocytes and, singly, neutrophils, but not monocytes                                                                     |
| N | P78556 | CC | C-terminal processed forms have been shown to be equally chemotactically active for leukocytes                                                               |
| N | P78556 | CC | Inhibits proliferation of myeloid progenitors in colony formation assays                                                                                     |
| N | P78556 | CC | May be involved in formation and function of the mucosal lymphoid tissues by attracting lymphocytes and dendritic cells towards epithelial cells             |
| N | P78556 | CC | Possesses antibacterial activity E.coli ATCC 25922 and S.aureus ATCC 29213.                                                                                  |

|   |        |    |                                                                                                                                              |
|---|--------|----|----------------------------------------------------------------------------------------------------------------------------------------------|
| N | P78556 | DE | Beta-chemokine exodus-1;                                                                                                                     |
| N | P78556 | DE | C-C motif chemokine 20;                                                                                                                      |
| N | P78556 | DE | CC chemokine LARC;                                                                                                                           |
| N | P78556 | DE | CCL20(1-64);                                                                                                                                 |
| N | P78556 | DE | CCL20(1-67);                                                                                                                                 |
| N | P78556 | DE | CCL20(2-70);                                                                                                                                 |
| N | P78556 | DE | Liver and activation-regulated chemokine;                                                                                                    |
| N | P78556 | DE | MIP-3-alpha;                                                                                                                                 |
| N | P78556 | DE | Macrophage inflammatory protein 3 alpha;                                                                                                     |
| N | P78556 | DE | Small-inducible cytokine A20;                                                                                                                |
| N | P78556 | DR | cell-cell signaling                                                                                                                          |
| N | P78556 | DR | chemokine activity                                                                                                                           |
| N | P78556 | DR | defense response to bacterium                                                                                                                |
| N | P78556 | DR | immune response                                                                                                                              |
| N | P78556 | DR | inflammatory response                                                                                                                        |
| N | P78556 | DR | signal transduction                                                                                                                          |
| N | P78763 | DE | Uncharacterized mitochondrial carrier C83.13;                                                                                                |
| N | P78763 | DR | mitochondrial transport                                                                                                                      |
| N | P78937 | CC | Catalyzes the first intracellular reaction of sulfate assimilation, forming adenosine-5'-phosphosulfate (APS) from inorganic sulfate and ATP |
| N | P78937 | CC | Plays an important role in sulfate activation as a component of the biosynthesis pathway of sulfur- containing amino acids (By similarity).  |
| N | P78937 | DE | ATP-sulfurylase;                                                                                                                             |
| N | P78937 | DE | Sulfate adenylate transferase;                                                                                                               |
| N | P78937 | DE | Sulfate adenyltransferase;                                                                                                                   |
| N | P78937 | DR | cysteine biosynthetic process                                                                                                                |
| N | P78937 | DR | methionine biosynthetic process                                                                                                              |
| N | P78937 | DR | sulfate adenyltransferase (ATP) activity                                                                                                     |
| N | P78937 | DR | sulfate assimilation                                                                                                                         |
| N | P79071 | DE | 60S ribosomal protein L6;                                                                                                                    |
| N | P79071 | DR | structural constituent of ribosome                                                                                                           |
| N | P79175 | CC | Receptor for the chemotactic and inflammatory peptide anaphylatoxin C5a                                                                      |
| N | P79175 | CC | This receptor stimulates chemotaxis, granule enzyme release and superoxide anion production.                                                 |
| N | P79175 | DE | C5a anaphylatoxin chemotactic receptor;                                                                                                      |
| N | P79175 | DR | C5a anaphylatoxin receptor activity                                                                                                          |
| N | P79339 | CC | participates in at least several B-cell activation processes as well as on other cell types                                                  |
| N | P79339 | CC | It also regulates the expression of the low affinity Fc receptor for IgE (CD23) on both lymphocytes and monocytes (By similarity).           |
| N | P79339 | CC | It enhances both secretion and cell surface expression of IgE and IgG1                                                                       |
| N | P79339 | CC | It induces the expression of class II MHC molecules on resting B-cells                                                                       |
| N | P79339 | CC | It is a costimulator of DNA-synthesis                                                                                                        |
| N | P79339 | DE | B-cell stimulatory factor 1;                                                                                                                 |
| N | P79339 | DE | Interleukin-4;                                                                                                                               |
| N | P79339 | DE | Lymphocyte stimulatory factor 1;                                                                                                             |
| N | P79339 | DR | B cell activation                                                                                                                            |
| N | P79339 | DR | cytokine activity                                                                                                                            |
| N | P79339 | DR | growth factor activity                                                                                                                       |
| N | P79339 | DR | immune response                                                                                                                              |
| N | P79339 | DR | interleukin-4 receptor binding                                                                                                               |
| N | P79339 | DR | negative regulation of apoptosis                                                                                                             |
| N | P79339 | DR | negative regulation of osteoclast differentiation                                                                                            |
| N | P79339 | DR | positive regulation of B cell proliferation                                                                                                  |
| N | P79339 | DR | positive regulation of MHC class II biosynthetic process                                                                                     |
| N | P79339 | DR | positive regulation of T cell proliferation                                                                                                  |
| N | P79339 | DR | positive regulation of isotype switching to IgE isotypes                                                                                     |
| N | P79339 | DR | positive regulation of isotype switching to IgG isotypes                                                                                     |
| N | P79339 | DR | positive regulation of transcription from RNA polymerase II promoter                                                                         |
| N | P79339 | DR | regulation of phosphorylation                                                                                                                |
| N | P79809 | CC | Visual pigments such as rhodopsin and porphyropsin are light-absorbing molecules that mediate vision                                         |
| N | P79809 | CC | Porphyropsin consists of opsin covalently linked to 11-cis 3,4- didehydroretinal.                                                            |
| N | P79809 | CC | Rhodopsin consists of an apoprotein, opsin, covalently linked to 11-cis-retinal                                                              |
| N | P79809 | CC | This receptor is coupled to the activation of phospholipase C                                                                                |
| N | P79809 | DR | G-protein coupled receptor activity                                                                                                          |

|   |        |    |                                                                                                                                                                                                                                                                                                                               |
|---|--------|----|-------------------------------------------------------------------------------------------------------------------------------------------------------------------------------------------------------------------------------------------------------------------------------------------------------------------------------|
| N | P79809 | DR | photoreceptor activity                                                                                                                                                                                                                                                                                                        |
| N | P79809 | DR | phototransduction                                                                                                                                                                                                                                                                                                             |
| N | P79809 | DR | protein-chromophore linkage                                                                                                                                                                                                                                                                                                   |
| N | P79809 | DR | visual perception                                                                                                                                                                                                                                                                                                             |
| N | P79944 | CC | Functions as a transcriptional activator playing a crucial role during development                                                                                                                                                                                                                                            |
| N | P79944 | CC | Activates wnt8, t/bra, chrd and mix-A/mix.1 expression.                                                                                                                                                                                                                                                                       |
| N | P79944 | CC | Functions in gastrulation, regulating mesoderm differentiation                                                                                                                                                                                                                                                                |
| N | P79944 | DE | Eomesodermin;                                                                                                                                                                                                                                                                                                                 |
| N | P79944 | DR | cell differentiation                                                                                                                                                                                                                                                                                                          |
| N | P79944 | DR | endoderm formation                                                                                                                                                                                                                                                                                                            |
| N | P79944 | DR | mesoderm formation                                                                                                                                                                                                                                                                                                            |
| N | P79944 | DR | regulation of transcription, DNA-dependent                                                                                                                                                                                                                                                                                    |
| N | P79944 | DR | sequence-specific DNA binding transcription factor activity                                                                                                                                                                                                                                                                   |
| N | P79944 | DR | transcription activator activity                                                                                                                                                                                                                                                                                              |
| N | P80288 | CC | Electron donor for nitrous-oxide reductase.                                                                                                                                                                                                                                                                                   |
| N | P80288 | DE | Cytochrome c-550;                                                                                                                                                                                                                                                                                                             |
| N | P80288 | DE | Cytochrome c550;                                                                                                                                                                                                                                                                                                              |
| N | P80288 | DR | electron carrier activity                                                                                                                                                                                                                                                                                                     |
| N | P80288 | DR | electron transport chain                                                                                                                                                                                                                                                                                                      |
| N | P80528 | CC | Thiol protease.                                                                                                                                                                                                                                                                                                               |
| N | P80528 | DE | Cathepsin L-like cysteine proteinase;                                                                                                                                                                                                                                                                                         |
| N | P80528 | DE | Newly excysted juvenile protein 4;                                                                                                                                                                                                                                                                                            |
| N | P80528 | DR | cysteine-type peptidase activity                                                                                                                                                                                                                                                                                              |
| N | P80682 | CC | Component of the cuticle of the larva of Tenebrio molitor.                                                                                                                                                                                                                                                                    |
| N | P80682 | DE | Larval cuticle protein A2B;                                                                                                                                                                                                                                                                                                   |
| N | P80682 | DR | structural constituent of cuticle                                                                                                                                                                                                                                                                                             |
| N | P80717 | DE | 1,4-beta-D-xylan xylanohydrolase B;                                                                                                                                                                                                                                                                                           |
| N | P80717 | DE | Endo-1,4-beta-xylanase B;                                                                                                                                                                                                                                                                                                     |
| N | P80717 | DE | Xylanase B;                                                                                                                                                                                                                                                                                                                   |
| N | P80717 | DR | endo-1,4-beta-xylanase activity                                                                                                                                                                                                                                                                                               |
| N | P80717 | DR | xylan catabolic process                                                                                                                                                                                                                                                                                                       |
| N | P81104 | CC | PPases accelerate the folding of proteins during protein synthesis.                                                                                                                                                                                                                                                           |
| N | P81104 | DE | 70 kDa peptidyl-prolyl isomerase;                                                                                                                                                                                                                                                                                             |
| N | P81104 | DE | Cyclophilin;                                                                                                                                                                                                                                                                                                                  |
| N | P81104 | DE | Peptidyl-prolyl cis-trans isomerase;                                                                                                                                                                                                                                                                                          |
| N | P81104 | DR | calmodulin binding                                                                                                                                                                                                                                                                                                            |
| N | P81104 | DR | peptidyl-prolyl cis-trans isomerase activity                                                                                                                                                                                                                                                                                  |
| N | P81104 | DR | protein folding                                                                                                                                                                                                                                                                                                               |
| N | P81162 | CC | Serine protease inhibitor.                                                                                                                                                                                                                                                                                                    |
| N | P81162 | DE | Protease inhibitor carrapatin;                                                                                                                                                                                                                                                                                                |
| N | P81162 | DR | serine-type endopeptidase inhibitor activity                                                                                                                                                                                                                                                                                  |
| N | P81240 | CC | Excitatory insect beta-toxins induce a spastic paralysis                                                                                                                                                                                                                                                                      |
| N | P81240 | CC | It is more similar to the excitatory toxins in its mode of action and the depressant toxins in its primary structure.                                                                                                                                                                                                         |
| N | P81240 | CC | It operates by inducing a fast contraction paralysis without depressant activity they bind voltage-independently at site-4 of sodium channels and shift the voltage of activation toward more negative potentials thereby affecting sodium channel activation and promoting spontaneous and repetitive firing (By similarite) |
| N | P81240 | CC | This toxin is active only on insects                                                                                                                                                                                                                                                                                          |
| N | P81240 | DE | Insect toxin LqhIT5;                                                                                                                                                                                                                                                                                                          |
| N | P81240 | DR | defense response                                                                                                                                                                                                                                                                                                              |
| N | P81240 | DR | sodium channel inhibitor activity                                                                                                                                                                                                                                                                                             |
| N | P81528 | CC | Hydrolyzes the cell walls of mycobacteria                                                                                                                                                                                                                                                                                     |
| N | P81528 | CC | May play an important role in cell wall growth and cell separation.                                                                                                                                                                                                                                                           |
| N | P81528 | DE | 38 kDa autolysin;                                                                                                                                                                                                                                                                                                             |
| N | P81528 | DE | Beta-glycosidase;                                                                                                                                                                                                                                                                                                             |
| N | P81528 | DE | Peptidoglycan hydrolase;                                                                                                                                                                                                                                                                                                      |
| N | P81528 | DR | barrier septum formation                                                                                                                                                                                                                                                                                                      |
| N | P81528 | DR | cellular cell wall organization                                                                                                                                                                                                                                                                                               |
| N | P81528 | DR | defense response to bacterium                                                                                                                                                                                                                                                                                                 |
| N | P81528 | DR | hydrolase activity, acting on glycosyl bonds                                                                                                                                                                                                                                                                                  |
| N | P81921 | CC | Complexes with Or83b to form odorant-sensing units, providing sensitive and prolonged odorant signaling and calcium permeability                                                                                                                                                                                              |
| N | P81921 | CC | They are necessary and sufficient to promote functional reconstruction of odor-evoked signaling in sensory neurons that normally respond only to carbon dioxide                                                                                                                                                               |

|   |        |    |                                                                                                                                                                              |
|---|--------|----|------------------------------------------------------------------------------------------------------------------------------------------------------------------------------|
| N | P81921 | DE | Odorant receptor 47a;                                                                                                                                                        |
| N | P81921 | DR | odorant binding                                                                                                                                                              |
| N | P81921 | DR | olfactory receptor activity                                                                                                                                                  |
| N | P81921 | DR | sensory perception of smell                                                                                                                                                  |
| N | P81988 | DE | Inorganic pyrophosphatase;                                                                                                                                                   |
| N | P81988 | DE | Pyrophosphate phospho-hydrolase;                                                                                                                                             |
| N | P81988 | DR | inorganic diphosphatase activity                                                                                                                                             |
| N | P82006 | CC | Structural component of the virion.                                                                                                                                          |
| N | P82006 | DE | 14.5 kDa structural polyprotein;                                                                                                                                             |
| N | P82166 | CC | Component of the cuticle of migratory locust which contains more than 100 different structural proteins.                                                                     |
| N | P82166 | DE | Cuticle protein 19.8;                                                                                                                                                        |
| N | P82166 | DR | structural constituent of cuticle                                                                                                                                            |
| N | P82291 | DE | Soluble cytochrome b558;                                                                                                                                                     |
| N | P82291 | DR | electron transport chain                                                                                                                                                     |
| N | P82610 | CC | Catalyzes the transfer of a methyl group from 5- methyltetrahydrofolate to homocysteine resulting in methionine formation.                                                   |
| N | P82610 | DE | 5-methyltetrahydropteroyltriglutamate--homocysteine methyltransferase;                                                                                                       |
| N | P82610 | DE | Cobalamin-independent methionine synthase;                                                                                                                                   |
| N | P82610 | DE | Methionine synthase, vitamin-B12 independent isozyme;                                                                                                                        |
| N | P82610 | DR | 5-methyltetrahydropteroyltriglutamate-homocysteine S-methyltransferase activity                                                                                              |
| N | P82610 | DR | induction by symbiont of host defense response                                                                                                                               |
| N | P82610 | DR | methionine biosynthetic process                                                                                                                                              |
| N | P82610 | DR | response to heat                                                                                                                                                             |
| N | P82610 | DR | zinc ion binding                                                                                                                                                             |
| N | P82837 | CC | Antibacterial activity against Gram-positive bacterium S.aureus and Gram-negative bacterium E.coli.                                                                          |
| N | P82837 | DE | Brevinin-1Be;                                                                                                                                                                |
| N | P82837 | DR | defense response to bacterium                                                                                                                                                |
| N | P82914 | DE | 28S ribosomal protein S15, mitochondrial;                                                                                                                                    |
| N | P82914 | DR | structural constituent of ribosome                                                                                                                                           |
| N | P83065 | CC | This is one of the proteins that binds and probably mediates the attachment of the 5S RNA into the large ribosomal subunit, where it forms part of the central protuberance. |
| N | P83065 | CC | Contacts the P site tRNA; the 5S rRNA and some of its associated proteins might help stabilize positioning of ribosome-bound tRNAs (By similarity).                          |
| N | P83065 | CC | In the 70S ribosome it contacts protein S13 of the 30S subunit (bridge B1b), connecting the two subunits; this bridge is implicated in subunit movement                      |
| N | P83065 | DE | 50S ribosomal protein L5;                                                                                                                                                    |
| N | P83143 | CC | Possesses antifungal activity against P.infestans but not F.graminearum.                                                                                                     |
| N | P83143 | DE | Antifungal protein 2 large subunit;                                                                                                                                          |
| N | P83143 | DR | defense response to bacterium                                                                                                                                                |
| N | P83143 | DR | defense response to fungus                                                                                                                                                   |
| N | P83143 | DR | killing of cells of other organism                                                                                                                                           |
| N | P83143 | DR | xenobiotic metabolic process                                                                                                                                                 |
| N | P83427 | CC | Has antibacterial activity, preferentially against Gram- negative bacteria.                                                                                                  |
| N | P83427 | DR | defense response to bacterium                                                                                                                                                |
| N | P83427 | DR | innate immune response                                                                                                                                                       |
| N | P83575 | DE | NADP phosphatase 1;                                                                                                                                                          |
| N | P83575 | DE | NADP phosphatase I;                                                                                                                                                          |
| N | P83575 | DR | hydrolase activity                                                                                                                                                           |
| N | P83627 | CC | Inhibits secondary vitellogenesis in females                                                                                                                                 |
| N | P83627 | CC | Has no hyperglycemic or molt-inhibiting activity.                                                                                                                            |
| N | P83627 | DE | Vitellogenesis-inhibiting hormone;                                                                                                                                           |
| N | P83627 | DR | neuropeptide hormone activity                                                                                                                                                |
| N | P83627 | DR | neuropeptide signaling pathway                                                                                                                                               |
| N | P83709 | CC | Acts as a chaperone (By similarity).                                                                                                                                         |
| N | P83709 | DE | Chaperone protein DnaK;                                                                                                                                                      |
| N | P83709 | DE | Heat shock 70 kDa protein;                                                                                                                                                   |
| N | P83709 | DE | Heat shock protein 70;                                                                                                                                                       |
| N | P83709 | DR | response to stress                                                                                                                                                           |
| N | P83749 | CC | Functional homolog of SRP receptor                                                                                                                                           |
| N | P83749 | CC | Probably involved in the reception and insertion of a subset of proteins at the cytoplasmic membrane (By similarity).                                                        |
| N | P83749 | DE | Cell division protein ftsY;                                                                                                                                                  |
| N | P83749 | DR | SRP-dependent cotranslational protein targeting to membrane                                                                                                                  |

|   |        |    |                                                                                                                                                                                                                              |
|---|--------|----|------------------------------------------------------------------------------------------------------------------------------------------------------------------------------------------------------------------------------|
| N | P83749 | DR | cell division                                                                                                                                                                                                                |
| N | P83749 | DR | nucleoside-triphosphatase activity                                                                                                                                                                                           |
| N | P83749 | DR | protein binding                                                                                                                                                                                                              |
| N | P83900 | CC | Guanine nucleotide exchange factor (GEF) for RAP1A, RAP2A and MRAS/M-Ras-GTP                                                                                                                                                 |
| N | P83900 | CC | Its association with MRAS inhibits Rap1 activation (By similarity).                                                                                                                                                          |
| N | P83900 | DE | M-Ras-regulated Rap GEF;                                                                                                                                                                                                     |
| N | P83900 | DE | Rap guanine nucleotide exchange factor 5;                                                                                                                                                                                    |
| N | P83900 | DR | guanyl-nucleotide exchange factor activity                                                                                                                                                                                   |
| N | P83900 | DR | regulation of small GTPase mediated signal transduction                                                                                                                                                                      |
| N | P83900 | DR | small GTPase mediated signal transduction                                                                                                                                                                                    |
| N | P83922 | CC | Mediates visceral muscle contractile activity (myotropic activity).                                                                                                                                                          |
| N | P83922 | DE | Periviscerokinin-1;                                                                                                                                                                                                          |
| N | P83922 | DR | neuropeptide signaling pathway                                                                                                                                                                                               |
| N | P84181 | CC | Probable role in the gustatory response (By similarity).                                                                                                                                                                     |
| N | P84181 | DE | Putative gustatory receptor 22d;                                                                                                                                                                                             |
| N | P84181 | DR | G-protein coupled receptor activity                                                                                                                                                                                          |
| N | P84181 | DR | sensory perception of taste                                                                                                                                                                                                  |
| N | P84182 | CC | Displays antimicrobial activity against E.coli, S.aureus and P.aeruginosa.                                                                                                                                                   |
| N | P84182 | DE | Antimicrobial peptide OEP3121;                                                                                                                                                                                               |
| N | P84182 | DR | defense response to bacterium                                                                                                                                                                                                |
| N | P84205 | CC | Involved in oxygen transport from gills to the various peripheral tissues.                                                                                                                                                   |
| N | P84205 | DE | Hemoglobin anodic alpha chain;                                                                                                                                                                                               |
| N | P84205 | DE | Hemoglobin anodic subunit alpha;                                                                                                                                                                                             |
| N | P84205 | DR | oxygen binding                                                                                                                                                                                                               |
| N | P84205 | DR | oxygen transporter activity                                                                                                                                                                                                  |
| N | P84439 | CC | Mediates visceral muscle contractile activity (myotropic activity).                                                                                                                                                          |
| N | P84439 | DE | Pea-PVK-2-like peptide;                                                                                                                                                                                                      |
| N | P84439 | DE | Periviscerokinin-2.1;                                                                                                                                                                                                        |
| N | P84439 | DE | Periviscerokinin-3;                                                                                                                                                                                                          |
| N | P84439 | DE | SheLa-PVK-3;                                                                                                                                                                                                                 |
| N | P84439 | DR | neuropeptide signaling pathway                                                                                                                                                                                               |
| N | P84452 | CC | Inhibits trypsin.                                                                                                                                                                                                            |
| N | P84452 | DE | Trypsin inhibitor 5;                                                                                                                                                                                                         |
| N | P84452 | DE | Trypsin inhibitor V;                                                                                                                                                                                                         |
| N | P84452 | DR | serine-type endopeptidase inhibitor activity                                                                                                                                                                                 |
| N | P84621 | CC | Has oxidoreductase activity                                                                                                                                                                                                  |
| N | P84621 | CC | The Hdl and Mvh subunits may together mediate electron transfer from hydrogen to an unidentified electron acceptor on the cytoplasmic side of the membrane.                                                                  |
| N | P84621 | DE | Heterodisulfide reductase subunit C-like protein;                                                                                                                                                                            |
| N | P84621 | DR | 4 iron, 4 sulfur cluster binding                                                                                                                                                                                             |
| N | P84621 | DR | electron carrier activity                                                                                                                                                                                                    |
| N | P84621 | DR | metal ion binding                                                                                                                                                                                                            |
| N | P84621 | DR | oxidation-reduction process                                                                                                                                                                                                  |
| N | P84621 | DR | oxidoreductase activity                                                                                                                                                                                                      |
| N | P84630 | CC | REVERSIBLY BLOCKS SHAKER B POTASSIUM CHANNELS, WITH A DISSOCIATION CONSTANT OF 200 nM                                                                                                                                        |
| N | P84630 | DE | Potassium channel toxin alpha-KTx 13.3;                                                                                                                                                                                      |
| N | P84630 | DR | potassium channel inhibitor activity                                                                                                                                                                                         |
| N | P84671 | CC | Myoactive (By similarity).                                                                                                                                                                                                   |
| N | P84671 | DE | DerVe-Capa-PK;                                                                                                                                                                                                               |
| N | P84671 | DE | Derve-PK-5;                                                                                                                                                                                                                  |
| N | P84671 | DE | FXPRL-amide;                                                                                                                                                                                                                 |
| N | P84671 | DE | Pyrokinin-5;                                                                                                                                                                                                                 |
| N | P84671 | DR | neuropeptide hormone activity                                                                                                                                                                                                |
| N | P84671 | DR | neuropeptide signaling pathway                                                                                                                                                                                               |
| N | P84797 | CC | Has antifungal activity against M.arachidicola with an IC(50) of 125 uM, but not against F.oxysporum                                                                                                                         |
| N | P84797 | CC | Has antibacterial activity against the Gram- negative bacterium P.fluorescens                                                                                                                                                |
| N | P84797 | CC | Has mitogenic activity towards murine splenocytes                                                                                                                                                                            |
| N | P84797 | CC | Inhibits human immunodeficiency virus-1 (HIV-1) reverse transcriptase with an IC(50) of 60 uM                                                                                                                                |
| N | P84797 | CC | Lacks antiproliferative activity towards HepG2 hepatoma cells                                                                                                                                                                |
| N | P84797 | CC | No antibacterial activity against the Gram-positive bacteria B.subtilis, B.cereus, B.megaterium, M.phei and S.aureus, or against the Gram-negative bacteria E.aerogenes, E.coli, P.aeruginosa, P.fluorescens and P.vulgaris. |

|   |        |    |                                                                                                                                                                                                           |
|---|--------|----|-----------------------------------------------------------------------------------------------------------------------------------------------------------------------------------------------------------|
| N | P84797 | DR | defense response to Gram-negative bacterium                                                                                                                                                               |
| N | P84797 | DR | defense response to fungus                                                                                                                                                                                |
| N | P84797 | DR | killing of cells of other organism                                                                                                                                                                        |
| N | P84797 | DR | positive regulation of cell division                                                                                                                                                                      |
| N | P84797 | DR | positive regulation of mitosis                                                                                                                                                                            |
| N | P84894 | CC | Produces in vitro relaxation of rat arterial smooth muscle and constriction of intestinal smooth muscle (By similarity).                                                                                  |
| N | P84894 | DE | [Val1,Thr6]-bradykinin;                                                                                                                                                                                   |
| N | P84894 | DR | defense response                                                                                                                                                                                          |
| N | P84976 | DE | Glycine-rich RNA-binding protein 2;                                                                                                                                                                       |
| N | P84976 | DR | nucleotide binding                                                                                                                                                                                        |
| N | P85354 | CC | May play a role in plant defense                                                                                                                                                                          |
| N | P85354 | CC | Probably has no oxalate oxidase activity even if the active site is conserved (By similarity).                                                                                                            |
| N | P85354 | DE | Germin-like protein 4;                                                                                                                                                                                    |
| N | P85354 | DR | metal ion binding                                                                                                                                                                                         |
| N | P85502 | CC | Structural protein.                                                                                                                                                                                       |
| N | P85502 | DE | ORF23 protein;                                                                                                                                                                                            |
| N | P85502 | DE | Structural protein 2;                                                                                                                                                                                     |
| N | P85548 | CC | Myoactive (By similarity).                                                                                                                                                                                |
| N | P85548 | DE | BlaDu-Capa-PKb;                                                                                                                                                                                           |
| N | P85548 | DE | FXPRL-amide;                                                                                                                                                                                              |
| N | P85548 | DE | Pyrokinin-5b;                                                                                                                                                                                             |
| N | P85548 | DR | neuropeptide hormone activity                                                                                                                                                                             |
| N | P85548 | DR | neuropeptide signaling pathway                                                                                                                                                                            |
| N | P85573 | CC | Mediates visceral muscle contractile activity (myotropic activity).                                                                                                                                       |
| N | P85573 | DE | CryKy-PVK-3;                                                                                                                                                                                              |
| N | P85573 | DE | Periviscerokinin-3;                                                                                                                                                                                       |
| N | P85573 | DR | neuropeptide signaling pathway                                                                                                                                                                            |
| N | P85840 | DE | Venom allergen 5;                                                                                                                                                                                         |
| N | P85929 | CC | Major role in the synthesis of nucleoside triphosphates other than ATP                                                                                                                                    |
| N | P85929 | CC | The ATP gamma phosphate is transferred to the NDP beta phosphate via a ping-pong mechanism, using a phosphorylated active-site intermediate.                                                              |
| N | P85929 | DE | NDP kinase I;                                                                                                                                                                                             |
| N | P85929 | DE | Nucleoside diphosphate kinase 1;                                                                                                                                                                          |
| N | P85929 | DE | Nucleoside diphosphate kinase I;                                                                                                                                                                          |
| N | P85929 | DR | metal ion binding                                                                                                                                                                                         |
| N | P85929 | DR | nucleoside diphosphate kinase activity                                                                                                                                                                    |
| N | P86017 | CC | Antimicrobial peptide (By similarity).                                                                                                                                                                    |
| N | P86017 | DE | Esculentin-2Ra;                                                                                                                                                                                           |
| N | P86017 | DR | defense response to bacterium                                                                                                                                                                             |
| N | P86018 | CC | Shows antibacterial activity against representative Gram-negative and Gram-positive bacterial species, and hemolytic activity (By similarity).                                                            |
| N | P86018 | DE | Esculentin-1R;                                                                                                                                                                                            |
| N | P86018 | DR | defense response to bacterium                                                                                                                                                                             |
| N | P86018 | DR | hemolysis in other organism                                                                                                                                                                               |
| N | P86049 | DE | Probable RNA-binding protein 46;                                                                                                                                                                          |
| N | P86049 | DE | RNA-binding motif protein 46;                                                                                                                                                                             |
| N | P86049 | DR | nucleotide binding                                                                                                                                                                                        |
| N | P86060 | DE | Unknown protein 2;                                                                                                                                                                                        |
| N | P86072 | DE | 1,4-alpha-D-glucan glucanohydrolase;                                                                                                                                                                      |
| N | P86072 | DE | Alpha-amylase 1;                                                                                                                                                                                          |
| N | P86072 | DR | alpha-amylase activity                                                                                                                                                                                    |
| N | P86072 | DR | carbohydrate metabolic process                                                                                                                                                                            |
| N | P86072 | DR | metal ion binding                                                                                                                                                                                         |
| N | P86135 | CC | Inhibits the formation of NO by neuronal nitric oxide synthase with an IC(50) of 81 ug/ml.                                                                                                                |
| N | P86135 | DE | Signiferin-3.1;                                                                                                                                                                                           |
| N | P86135 | DR | defense response                                                                                                                                                                                          |
| N | P86135 | DR | negative regulation of nitric-oxide synthase activity                                                                                                                                                     |
| N | P86168 | CC | Has antifungal activity against S.sclerotiorum (MIC=32.4 ug/ml after 288 hours) and B.cinerea (MIC=10.8 ug/ml after 288 hours), and weak antifungal activity against F.solani, A.fumigatus and G.candidum |
| N | P86168 | CC | Inhibits the production of interleukin-2 by activated CD4+ T-cells with an IC(50) of 167.3 nM                                                                                                             |

|   |        |    |                                                                                                                                                                                                                |
|---|--------|----|----------------------------------------------------------------------------------------------------------------------------------------------------------------------------------------------------------------|
| N | P86168 | CC | Lacks antifungal activity against <i>P.ultimum</i> , <i>T.viride</i> and <i>R.solani</i>                                                                                                                       |
| N | P86168 | CC | Lacks cytotoxic activity against human peripheral blood mononuclear cells.                                                                                                                                     |
| N | P86168 | DE | Colutellin-A;                                                                                                                                                                                                  |
| N | P86168 | DR | defense response to fungus                                                                                                                                                                                     |
| N | P86168 | DR | killing of cells of other organism                                                                                                                                                                             |
| N | P86168 | DR | negative regulation of interleukin-2 production                                                                                                                                                                |
| N | P86303 | DE | Tachykinin-like peptide-VI;                                                                                                                                                                                    |
| N | P86390 | CC | Involved in oxygen transport from the lung to the various peripheral tissues.                                                                                                                                  |
| N | P86390 | DE | Beta-2-globin;                                                                                                                                                                                                 |
| N | P86390 | DE | Hemoglobin beta-2 chain;                                                                                                                                                                                       |
| N | P86390 | DE | Hemoglobin beta-II chain;                                                                                                                                                                                      |
| N | P86390 | DE | Hemoglobin subunit beta-2;                                                                                                                                                                                     |
| N | P86390 | DR | oxygen binding                                                                                                                                                                                                 |
| N | P86390 | DR | oxygen transporter activity                                                                                                                                                                                    |
| N | P86391 | CC | Involved in oxygen transport from the lung to the various peripheral tissues.                                                                                                                                  |
| N | P86391 | DE | Beta-2-globin;                                                                                                                                                                                                 |
| N | P86391 | DE | Hemoglobin beta-2 chain;                                                                                                                                                                                       |
| N | P86391 | DE | Hemoglobin beta-II chain;                                                                                                                                                                                      |
| N | P86391 | DE | Hemoglobin subunit beta-2;                                                                                                                                                                                     |
| N | P86391 | DR | oxygen binding                                                                                                                                                                                                 |
| N | P86391 | DR | oxygen transporter activity                                                                                                                                                                                    |
| N | P86577 | DE | Tachykinin-related peptide 3;                                                                                                                                                                                  |
| N | P86577 | DR | neuropeptide signaling pathway                                                                                                                                                                                 |
| N | P86648 | CC | Mediates visceral muscle contractile activity (myotropic activity) (By similarity).                                                                                                                            |
| N | P86648 | DE | Periviscerokinin-1;                                                                                                                                                                                            |
| N | P86648 | DR | neuropeptide signaling pathway                                                                                                                                                                                 |
| N | P86778 | CC | In muscle, parvalbumin is thought to be involved in relaxation after contraction                                                                                                                               |
| N | P86778 | CC | It binds two calcium ions (By similarity).                                                                                                                                                                     |
| N | P86778 | DE | Parvalbumin beta 1;                                                                                                                                                                                            |
| N | P86778 | DR | calcium ion binding                                                                                                                                                                                            |
| N | P87023 | CC | Involved in the synthesis of (1->6)- and (1->3)-beta-D- glucan polymers of the yeast cell wall in vivo                                                                                                         |
| N | P87023 | CC | It is required for full activity of beta-glucan synthase in vitro                                                                                                                                              |
| N | P87023 | CC | it may be a beta- glucan synthase, part of a multiprotein glucan synthase or a modulator                                                                                                                       |
| N | P87023 | DE | Beta-glucan synthesis-associated protein KRE6;                                                                                                                                                                 |
| N | P87023 | DR | cellular cell wall organization                                                                                                                                                                                |
| N | P87220 | CC | Subunit of the peripheral V1 complex of vacuolar ATPase                                                                                                                                                        |
| N | P87220 | CC | V-ATPase is responsible for acidifying a variety of intracellular compartments in eukaryotic cells, thus providing most of the energy required for transport processes in the vacuolar system (By similarity). |
| N | P87220 | DE | V-ATPase subunit D;                                                                                                                                                                                            |
| N | P87220 | DE | V-type proton ATPase subunit D;                                                                                                                                                                                |
| N | P87220 | DE | Vacuolar proton pump subunit D;                                                                                                                                                                                |
| N | P87220 | DR | ATP hydrolysis coupled proton transport                                                                                                                                                                        |
| N | P87220 | DR | proton-transporting ATPase activity, rotational mechanism                                                                                                                                                      |
| N | P87228 | DE | Putative D-3-phosphoglycerate dehydrogenase;                                                                                                                                                                   |
| N | P87228 | DR | L-serine biosynthetic process                                                                                                                                                                                  |
| N | P87228 | DR | oxidation-reduction process                                                                                                                                                                                    |
| N | P87228 | DR | phosphoglycerate dehydrogenase activity                                                                                                                                                                        |
| N | P87238 | DE | CUE domain-containing protein 4, mitochondrial;                                                                                                                                                                |
| N | P87347 | DE | Oocyte maturation factor mos;                                                                                                                                                                                  |
| N | P87347 | DE | Serine/threonine-protein kinase mos;                                                                                                                                                                           |
| N | P87347 | DR | protein phosphorylation                                                                                                                                                                                        |
| N | P87347 | DR | protein serine/threonine kinase activity                                                                                                                                                                       |
| N | P87745 | CC | The large envelope protein exists in two topological conformations, one which is termed 'external' or Le-HBsAg and the other 'internal' or Li-HBsAg                                                            |
| N | P87745 | CC | In its external conformation the protein attaches the virus to cell receptors and thereby initiating infection                                                                                                 |
| N | P87745 | CC | In its internal conformation the protein plays a role in virion morphogenesis and mediates the contact with the nucleocapsid like a matrix protein (By similarity).                                            |
| N | P87745 | CC | The large envelope protein probably also assumes fusion between virion and host membranes                                                                                                                      |
| N | P87745 | CC | This interaction determines the species specificity and liver tropism                                                                                                                                          |
| N | P87745 | DE | L glycoprotein;                                                                                                                                                                                                |
| N | P87745 | DE | Large S protein;                                                                                                                                                                                               |



|   |        |    |                                                                                                                                                                                                                        |
|---|--------|----|------------------------------------------------------------------------------------------------------------------------------------------------------------------------------------------------------------------------|
| N | P87745 | DE | Large envelope protein;                                                                                                                                                                                                |
| N | P87745 | DE | Large surface protein;                                                                                                                                                                                                 |
| N | P87745 | DE | Major surface antigen;                                                                                                                                                                                                 |
| N | P87745 | DR | viral reproduction                                                                                                                                                                                                     |
| N | P92657 | CC | Component of the ubiquinol-cytochrome c reductase complex (complex III or cytochrome b-c1 complex), which is a respiratory chain that generates an electrochemical potential coupled to ATP synthesis (By similarity). |
| N | P92657 | DE | Complex III subunit 3;                                                                                                                                                                                                 |
| N | P92657 | DE | Complex III subunit III;                                                                                                                                                                                               |
| N | P92657 | DE | Cytochrome b-c1 complex subunit 3;                                                                                                                                                                                     |
| N | P92657 | DE | Cytochrome b;                                                                                                                                                                                                          |
| N | P92657 | DE | Ubiquinol-cytochrome-c reductase complex cytochrome b subunit;                                                                                                                                                         |
| N | P92657 | DR | electron carrier activity                                                                                                                                                                                              |
| N | P92657 | DR | metal ion binding                                                                                                                                                                                                      |
| N | P92657 | DR | oxidoreductase activity                                                                                                                                                                                                |
| N | P92657 | DR | respiratory electron transport chain                                                                                                                                                                                   |
| N | P92994 | CC | Controls carbon flux to pigments essential for photoprotection, to numerous phytoalexins synthesized by plants when challenged by pathogens, and to lignins                                                            |
| N | P92994 | DE | Cinnamic acid 4-hydroxylase;                                                                                                                                                                                           |
| N | P92994 | DE | Cytochrome P450 73;                                                                                                                                                                                                    |
| N | P92994 | DE | Cytochrome P450C4H;                                                                                                                                                                                                    |
| N | P92994 | DE | Trans-cinnamate 4-monooxygenase;                                                                                                                                                                                       |
| N | P92994 | DR | electron carrier activity                                                                                                                                                                                              |
| N | P92994 | DR | lignin metabolic process                                                                                                                                                                                               |
| N | P92994 | DR | oxidation-reduction process                                                                                                                                                                                            |
| N | P92994 | DR | pollen development                                                                                                                                                                                                     |
| N | P92994 | DR | response to karrikin                                                                                                                                                                                                   |
| N | P92994 | DR | trans-cinnamate 4-monooxygenase activity                                                                                                                                                                               |
| N | P93015 | CC | Trans-acting factor that binds specifically to the consensus nucleotide sequence 5'-TNCGTACAA-3' of AP1 promoter                                                                                                       |
| N | P93015 | CC | Binds specifically to the 5'-GTAC-3' core sequence                                                                                                                                                                     |
| N | P93015 | CC | Promotes both vegetative phase change and flowering                                                                                                                                                                    |
| N | P93015 | CC | Regulates phase-specific patterns of leaf epidermal differentiation and flowering time, but does not seem to affect leaf shape.                                                                                        |
| N | P93015 | DE | Squamosa promoter-binding-like protein 3;                                                                                                                                                                              |
| N | P93015 | DR | cell differentiation                                                                                                                                                                                                   |
| N | P93015 | DR | flower development                                                                                                                                                                                                     |
| N | P93015 | DR | inflorescence development                                                                                                                                                                                              |
| N | P93015 | DR | metal ion binding                                                                                                                                                                                                      |
| N | P93015 | DR | positive regulation of flower development                                                                                                                                                                              |
| N | P93015 | DR | regulation of vegetative phase change                                                                                                                                                                                  |
| N | P93015 | DR | sequence-specific DNA binding transcription factor activity                                                                                                                                                            |
| N | P94026 | CC | Methylates 'Lys-14' of the large subunit of RuBisCO.                                                                                                                                                                   |
| N | P94026 | DE | Ribulose-1,5 bisphosphate carboxylase/oxygenase large subunit N-methyltransferase, chloroplastic;                                                                                                                      |
| N | P94026 | DE | RuBisCO LSMT;                                                                                                                                                                                                          |
| N | P94026 | DE | RuBisCO methyltransferase;                                                                                                                                                                                             |
| N | P94026 | DE | [Ribulose-bisphosphate carboxylase]-lysine N-methyltransferase;                                                                                                                                                        |
| N | P94026 | DR | [ribulose-bisphosphate carboxylase]-lysine N-methyltransferase activity                                                                                                                                                |
| N | P94462 | CC | Removes the formyl group from the N-terminal Met of newly synthesized proteins                                                                                                                                         |
| N | P94462 | CC | N-terminal L-methionine is a prerequisite for activity but the enzyme has broad specificity at other positions (By similarity).                                                                                        |
| N | P94462 | CC | Requires at least a dipeptide for an efficient rate of reaction                                                                                                                                                        |
| N | P94462 | DE | Peptide deformylase 1;                                                                                                                                                                                                 |
| N | P94462 | DE | Polypeptide deformylase 1;                                                                                                                                                                                             |
| N | P94462 | DR | iron ion binding                                                                                                                                                                                                       |
| N | P94462 | DR | peptide deformylase activity                                                                                                                                                                                           |
| N | P94666 | CC | Can catalyze the hydrolysis of ATP in the presence of single-stranded DNA, the ATP-dependent uptake of single-stranded DNA by duplex DNA, and the ATP-dependent hybridization of homologous single-stranded DNAs       |
| N | P94666 | CC | It interacts with LexA causing its activation and leading to its autocatalytic cleavage                                                                                                                                |
| N | P94666 | DE | Protein RecA;                                                                                                                                                                                                          |
| N | P94666 | DE | Recombinase A;                                                                                                                                                                                                         |
| N | P94666 | DR | DNA recombination                                                                                                                                                                                                      |
| N | P94666 | DR | DNA-dependent ATPase activity                                                                                                                                                                                          |

|   |        |    |                                                                                                                                                                                                                                                                                                                  |
|---|--------|----|------------------------------------------------------------------------------------------------------------------------------------------------------------------------------------------------------------------------------------------------------------------------------------------------------------------|
| N | P94666 | DR | single-stranded DNA binding                                                                                                                                                                                                                                                                                      |
| N | P94907 | CC | Catalyzes the condensation of the acetyl group of acetyl-CoA with 3-methyl-2-oxobutanoate (2-oxoisovalerate) to form 3-carboxy-3-hydroxy-4-methylpentanoate (2-isopropylmalate) (By similarity).                                                                                                                 |
| N | P94907 | DE | 2-isopropylmalate synthase;                                                                                                                                                                                                                                                                                      |
| N | P94907 | DE | Alpha-IPM synthase;                                                                                                                                                                                                                                                                                              |
| N | P94907 | DE | Alpha-isopropylmalate synthase;                                                                                                                                                                                                                                                                                  |
| N | P94907 | DR | 2-isopropylmalate synthase activity                                                                                                                                                                                                                                                                              |
| N | P94907 | DR | leucine biosynthetic process                                                                                                                                                                                                                                                                                     |
| N | P95315 | DE | Uncharacterized PPE family protein PPE36;                                                                                                                                                                                                                                                                        |
| N | P95669 | CC | Binds and compact DNA (95 to 150 base pairs) to form nucleosome-like structures that contain positive DNA supercoils                                                                                                                                                                                             |
| N | P95669 | CC | Increases the resistance of DNA to thermal denaturation (By similarity).                                                                                                                                                                                                                                         |
| N | P95669 | DE | Archaeal histone HAN1 subunit A;                                                                                                                                                                                                                                                                                 |
| N | P95669 | DR | sequence-specific DNA binding                                                                                                                                                                                                                                                                                    |
| N | P96174 | DE | Aspartate carbamoyltransferase catalytic chain;                                                                                                                                                                                                                                                                  |
| N | P96174 | DE | Aspartate transcarbamylase;                                                                                                                                                                                                                                                                                      |
| N | P96174 | DR | 'de novo' pyrimidine base biosynthetic process                                                                                                                                                                                                                                                                   |
| N | P96174 | DR | amino acid binding                                                                                                                                                                                                                                                                                               |
| N | P96174 | DR | aspartate carbamoyltransferase activity                                                                                                                                                                                                                                                                          |
| N | P96174 | DR | cellular amino acid metabolic process                                                                                                                                                                                                                                                                            |
| N | P96174 | DR | pyrimidine nucleotide biosynthetic process                                                                                                                                                                                                                                                                       |
| N | P96581 | DE | Uncharacterized protein ydaH;                                                                                                                                                                                                                                                                                    |
| N | P96632 | DE | Uncharacterized protein ydcO;                                                                                                                                                                                                                                                                                    |
| N | P96686 | CC | Member of the two-component regulatory system ydfH/ydfI                                                                                                                                                                                                                                                          |
| N | P96686 | CC | Regulates the transcription of ydfJ by binding to its promoter region.                                                                                                                                                                                                                                           |
| N | P96686 | DE | Transcriptional regulatory protein ydfI;                                                                                                                                                                                                                                                                         |
| N | P96686 | DR | regulation of transcription, DNA-dependent                                                                                                                                                                                                                                                                       |
| N | P96686 | DR | sequence-specific DNA binding                                                                                                                                                                                                                                                                                    |
| N | P96686 | DR | sequence-specific DNA binding transcription factor activity                                                                                                                                                                                                                                                      |
| N | P96686 | DR | two-component response regulator activity                                                                                                                                                                                                                                                                        |
| N | P97028 | DE | Uncharacterized protein ygaN;                                                                                                                                                                                                                                                                                    |
| N | P97280 | CC | May act as a carrier of hyaluronan in serum or as a binding protein between hyaluronan and other matrix protein, including those on cell surfaces in tissues to regulate the localization, synthesis and degradation of hyaluronan which are essential to cells undergoing biological processes (By similarity). |
| N | P97280 | DE | ITI heavy chain H3;                                                                                                                                                                                                                                                                                              |
| N | P97280 | DE | Inter-alpha-inhibitor heavy chain 3;                                                                                                                                                                                                                                                                             |
| N | P97280 | DE | Inter-alpha-trypsin inhibitor heavy chain H3;                                                                                                                                                                                                                                                                    |
| N | P97280 | DR | hyaluronan metabolic process                                                                                                                                                                                                                                                                                     |
| N | P97280 | DR | serine-type endopeptidase inhibitor activity                                                                                                                                                                                                                                                                     |
| N | P97402 | CC | Branching enzyme that converts linear into branched poly-N-acetyllactosaminoglucans                                                                                                                                                                                                                              |
| N | P97402 | CC | Introduces the blood group I antigen during embryonic development                                                                                                                                                                                                                                                |
| N | P97402 | CC | It is closely associated with the development and maturation of erythroid cells.                                                                                                                                                                                                                                 |
| N | P97402 | DE | I-branching enzyme;                                                                                                                                                                                                                                                                                              |
| N | P97402 | DE | Large I antigen-forming beta-1,6-N-acetylglucosaminyltransferase;                                                                                                                                                                                                                                                |
| N | P97402 | DE | N-acetylglucosaminyltransferase;                                                                                                                                                                                                                                                                                 |
| N | P97402 | DE | N-acetyllactosaminide beta-1,6-N-acetylglucosaminyl-transferase;                                                                                                                                                                                                                                                 |
| N | P97402 | DR | N-acetyllactosaminide beta-1,6-N-acetylglucosaminyltransferase activity                                                                                                                                                                                                                                          |
| N | P97541 | DE | Heat shock 20 kDa-like protein p20;                                                                                                                                                                                                                                                                              |
| N | P97541 | DE | Heat shock protein beta-6;                                                                                                                                                                                                                                                                                       |
| N | P97541 | DR | protein homodimerization activity                                                                                                                                                                                                                                                                                |
| N | P97541 | DR | regulation of muscle contraction                                                                                                                                                                                                                                                                                 |
| N | P97541 | DR | response to heat                                                                                                                                                                                                                                                                                                 |
| N | P97541 | DR | structural constituent of eye lens                                                                                                                                                                                                                                                                               |
| N | P98044 | CC | Cytochrome c oxidase is the component of the respiratory chain that catalyzes the reduction of oxygen to water                                                                                                                                                                                                   |
| N | P98044 | CC | Subunit 2 transfers the electrons from cytochrome c via its binuclear copper A center to the bimetallic center of the catalytic subunit 1.                                                                                                                                                                       |
| N | P98044 | CC | Subunits 1- 3 form the functional core of the enzyme complex                                                                                                                                                                                                                                                     |
| N | P98044 | DE | Cytochrome c oxidase polypeptide II;                                                                                                                                                                                                                                                                             |
| N | P98044 | DE | Cytochrome c oxidase subunit 2;                                                                                                                                                                                                                                                                                  |
| N | P98044 | DR | copper ion binding                                                                                                                                                                                                                                                                                               |
| N | P98044 | DR | cytochrome-c oxidase activity                                                                                                                                                                                                                                                                                    |
| N | P98044 | DR | electron carrier activity                                                                                                                                                                                                                                                                                        |

|   |        |    |                                                                                                                                                                   |
|---|--------|----|-------------------------------------------------------------------------------------------------------------------------------------------------------------------|
| N | P98044 | DR | respiratory electron transport chain                                                                                                                              |
| N | P99159 | CC | Catalyzes the condensation reaction of fatty acid synthesis by the addition to an acyl acceptor of two carbons from malonyl-ACP                                   |
| N | P99159 | CC | Catalyzes the first condensation reaction which initiates fatty acid synthesis and may therefore play a role in governing the total rate of fatty acid production |
| N | P99159 | CC | Has some substrate preference for butyryl- and isobutyryl-CoA                                                                                                     |
| N | P99159 | CC | its substrate specificity determines the biosynthesis of branched-chain fatty acids                                                                               |
| N | P99159 | CC | Possesses both acetoacetyl-ACP synthase and acetyl transacylase activities                                                                                        |
| N | P99159 | DE | 3-oxoacyl-[acyl-carrier-protein] synthase 3;                                                                                                                      |
| N | P99159 | DE | 3-oxoacyl-[acyl-carrier-protein] synthase III;                                                                                                                    |
| N | P99159 | DE | Beta-ketoacyl-ACP synthase III;                                                                                                                                   |
| N | P99159 | DR | 3-oxoacyl-[acyl-carrier-protein] synthase activity                                                                                                                |
| N | P99159 | DR | beta-ketoacyl-acyl-carrier-protein synthase III activity                                                                                                          |
| N | P99159 | DR | fatty acid biosynthetic process                                                                                                                                   |
| N | Q00103 | DE | Uncharacterized protein ORF72;                                                                                                                                    |
| N | Q00103 | DR | zinc ion binding                                                                                                                                                  |
| N | Q00234 | CC | This is a copper-containing oxidase that functions in the formation of pigments such as melanins and other polyphenolic compounds.                                |
| N | Q00234 | DE | Monophenol monooxygenase;                                                                                                                                         |
| N | Q00234 | DR | melanin biosynthetic process                                                                                                                                      |
| N | Q00234 | DR | metal ion binding                                                                                                                                                 |
| N | Q00234 | DR | monophenol monooxygenase activity                                                                                                                                 |
| N | Q00234 | DR | oxidation-reduction process                                                                                                                                       |
| N | Q00651 | CC | Integrins alpha-4/beta-1 (VLA-4 or LPAM-2) and alpha- 4/beta-7 (LPAM-1) are receptors for fibronectin                                                             |
| N | Q00651 | CC | Integrin alpha- 4/beta-7 is also a receptor for MADCAM1                                                                                                           |
| N | Q00651 | CC | Integrin alpha-4/beta-1 recognizes the sequence Q-I-D-S in VCAM1                                                                                                  |
| N | Q00651 | CC | Integrin alpha-4/beta-7 is also a receptor for MADCAM1                                                                                                            |
| N | Q00651 | CC | It may also participate in cytolytic T-cell interactions with target cells                                                                                        |
| N | Q00651 | CC | It recognizes the sequence L-D-T in MADCAM1                                                                                                                       |
| N | Q00651 | CC | Mice homozygous for a null mutation of the alpha-4 subunit gene die by day E11-E14 from detachment and rupture of the epicardium and coronary arteries.           |
| N | Q00651 | CC | On activated endothelial cells integrin VLA-4 triggers homotypic aggregation for most VLA- 4-positive leukocyte cell lines                                        |
| N | Q00651 | CC | They are also receptors for VCAM1                                                                                                                                 |
| N | Q00651 | CC | They recognize one or more domains within the alternatively spliced CS-1 and CS-5 regions of fibronectin                                                          |
| N | Q00651 | DE | CD49 antigen-like family member D;                                                                                                                                |
| N | Q00651 | DE | CD49d;                                                                                                                                                            |
| N | Q00651 | DE | Integrin alpha-4;                                                                                                                                                 |
| N | Q00651 | DE | Integrin alpha-IV;                                                                                                                                                |
| N | Q00651 | DE | LPAM subunit alpha;                                                                                                                                               |
| N | Q00651 | DE | Lymphocyte Peyer patch adhesion molecules subunit alpha;                                                                                                          |
| N | Q00651 | DE | VLA-4 subunit alpha;                                                                                                                                              |
| N | Q00651 | DR | blood vessel remodeling                                                                                                                                           |
| N | Q00651 | DR | cell migration                                                                                                                                                    |
| N | Q00651 | DR | cell-matrix adhesion                                                                                                                                              |
| N | Q00651 | DR | chorio-allantoic fusion                                                                                                                                           |
| N | Q00651 | DR | face development                                                                                                                                                  |
| N | Q00651 | DR | fibronectin binding                                                                                                                                               |
| N | Q00651 | DR | heterophilic cell-cell adhesion                                                                                                                                   |
| N | Q00651 | DR | integrin-mediated signaling pathway                                                                                                                               |
| N | Q00651 | DR | leukocyte cell-cell adhesion                                                                                                                                      |
| N | Q00651 | DR | mesenchyme development                                                                                                                                            |
| N | Q00651 | DR | receptor activity                                                                                                                                                 |
| N | Q00651 | DR | visceral serous pericardium development                                                                                                                           |
| N | Q00747 | DE | Protein LE25;                                                                                                                                                     |
| N | Q00747 | DR | embryo development                                                                                                                                                |
| N | Q00970 | CC | Performs an essential function in the repair of oxidatively damaged mtDNA that is required for the maintenance of the mitochondrial genome                        |
| N | Q00970 | CC | Binds to DNA (By similarity).                                                                                                                                     |
| N | Q00970 | DE | Mitochondrial genome maintenance protein MGM101;                                                                                                                  |
| N | Q00970 | DR | mitochondrial genome maintenance                                                                                                                                  |
| N | Q00996 | DE | Surface glycoprotein CD59 homolog;                                                                                                                                |

|   |        |    |                                                                                                                                                                                                                                         |
|---|--------|----|-----------------------------------------------------------------------------------------------------------------------------------------------------------------------------------------------------------------------------------------|
| N | Q01020 | CC | Component of the molecular motor that translocates genomic DNA in empty capsid during DNA packaging                                                                                                                                     |
| N | Q01020 | CC | heterodimerizes with small terminase protein to be docked on capsid portal protein                                                                                                                                                      |
| N | Q01020 | CC | May have or induce an endonuclease activity to cleave the genome concatemer after encapsidation (By similarity).                                                                                                                        |
| N | Q01020 | CC | The latter forms a ring in which genomic DNA is translocated into the capsid                                                                                                                                                            |
| N | Q01020 | DE | DNA-packaging protein 29;                                                                                                                                                                                                               |
| N | Q01020 | DE | Terminase large subunit;                                                                                                                                                                                                                |
| N | Q01020 | DE | Tripartite terminase subunit UL15 homolog;                                                                                                                                                                                              |
| N | Q01020 | DR | DNA packaging                                                                                                                                                                                                                           |
| N | Q01229 | DE | Protein B11;                                                                                                                                                                                                                            |
| N | Q01327 | DE | Ornithine carbamoyltransferase;                                                                                                                                                                                                         |
| N | Q01327 | DR | amino acid binding                                                                                                                                                                                                                      |
| N | Q01327 | DR | arginine biosynthetic process                                                                                                                                                                                                           |
| N | Q01327 | DR | ornithine carbamoyltransferase activity                                                                                                                                                                                                 |
| N | Q01449 | DE | Myosin light chain 2a;                                                                                                                                                                                                                  |
| N | Q01449 | DE | Myosin regulatory light chain 2, atrial isoform;                                                                                                                                                                                        |
| N | Q01449 | DE | Myosin regulatory light chain 7;                                                                                                                                                                                                        |
| N | Q01449 | DR | ATPase activity, coupled                                                                                                                                                                                                                |
| N | Q01449 | DR | actin filament-based movement                                                                                                                                                                                                           |
| N | Q01449 | DR | calcium ion binding                                                                                                                                                                                                                     |
| N | Q01449 | DR | microfilament motor activity                                                                                                                                                                                                            |
| N | Q01449 | DR | smooth muscle contraction                                                                                                                                                                                                               |
| N | Q01457 | CC | Provides resistance to bacteriophage by abortive infection.                                                                                                                                                                             |
| N | Q01457 | DE | Abortive phage resistance protein AbiC;                                                                                                                                                                                                 |
| N | Q01550 | DR | structural molecule activity                                                                                                                                                                                                            |
| N | Q01769 | CC | essential component of the RNA polymerase transcription and replication complex                                                                                                                                                         |
| N | Q01769 | CC | Binds the viral ribonucleocapsid and positions the L polymerase on the template                                                                                                                                                         |
| N | Q01769 | CC | May acts as a chaperone for newly synthesized free N protein, so-called N(0)                                                                                                                                                            |
| N | Q01769 | CC | Plays a role in virion assembly (By similarity).                                                                                                                                                                                        |
| N | Q01769 | DE | Phosphoprotein;                                                                                                                                                                                                                         |
| N | Q01769 | DR | RNA-directed RNA polymerase activity                                                                                                                                                                                                    |
| N | Q01819 | CC | Cell adhesion protein involved in target recognition during neuromuscular development                                                                                                                                                   |
| N | Q01819 | CC | Mediates homophilic cellular adhesion.                                                                                                                                                                                                  |
| N | Q01819 | DR | axonal fasciculation                                                                                                                                                                                                                    |
| N | Q01819 | DR | homophilic cell adhesion                                                                                                                                                                                                                |
| N | Q01819 | DR | synaptic target attraction                                                                                                                                                                                                              |
| N | Q01980 | CC | Transcriptional activator of anaerobic gene expression                                                                                                                                                                                  |
| N | Q01980 | CC | Also required for the anaerobic degradation of benzoate.                                                                                                                                                                                |
| N | Q01980 | CC | For aromatic acid degradation                                                                                                                                                                                                           |
| N | Q01980 | DE | Anaerobic aromatic degradation regulator;                                                                                                                                                                                               |
| N | Q01980 | DE | Transcriptional activatory protein AadR;                                                                                                                                                                                                |
| N | Q01980 | DR | regulation of transcription, DNA-dependent                                                                                                                                                                                              |
| N | Q01980 | DR | sequence-specific DNA binding transcription factor activity                                                                                                                                                                             |
| N | Q01SK1 | DE | UPF0182 protein Acid_6445;                                                                                                                                                                                                              |
| N | Q01UN9 | CC | NDH-1 shuttles electrons from NADH, via FMN and iron- sulfur (Fe-S) centers, to quinones in the respiratory chain                                                                                                                       |
| N | Q01UN9 | CC | Couples the redox reaction to proton translocation (for every two electrons transferred, four hydrogen ions are translocated across the cytoplasmic membrane), and thus conserves the redox energy in a proton gradient (By similarity) |
| N | Q01UN9 | CC | The immediate electron acceptor for the enzyme in this species is believed to be ubiquinone                                                                                                                                             |
| N | Q01UN9 | DE | NADH dehydrogenase I subunit D 2;                                                                                                                                                                                                       |
| N | Q01UN9 | DE | NADH-quinone oxidoreductase subunit D 2;                                                                                                                                                                                                |
| N | Q01UN9 | DE | NDH-1 subunit D 2;                                                                                                                                                                                                                      |
| N | Q01UN9 | DR | NADH dehydrogenase (quinone) activity                                                                                                                                                                                                   |
| N | Q01UN9 | DR | oxidation-reduction process                                                                                                                                                                                                             |
| N | Q01UN9 | DR | quinone binding                                                                                                                                                                                                                         |
| N | Q01YD0 | CC | Catalyzes the interconversion of 2-phosphoglycerate and 3-phosphoglycerate (By similarity).                                                                                                                                             |
| N | Q01YD0 | DE | 2,3-bisphosphoglycerate-dependent phosphoglycerate mutase;                                                                                                                                                                              |
| N | Q01YD0 | DE | BPG-dependent PGAM;                                                                                                                                                                                                                     |
| N | Q01YD0 | DE | Phosphoglyceromutase;                                                                                                                                                                                                                   |
| N | Q01YD0 | DR | phosphoglycerate mutase activity                                                                                                                                                                                                        |

|   |        |    |                                                                                                                                                                                                                        |
|---|--------|----|------------------------------------------------------------------------------------------------------------------------------------------------------------------------------------------------------------------------|
| N | Q020J1 | CC | Responsible for the transport of dicarboxylates such as succinate, fumarate, and malate from the periplasm across the membrane (By similarity).                                                                        |
| N | Q020J1 | DE | C4-dicarboxylate transport protein;                                                                                                                                                                                    |
| N | Q020J1 | DR | carbohydrate transport                                                                                                                                                                                                 |
| N | Q020J1 | DR | sodium:dicarboxylate symporter activity                                                                                                                                                                                |
| N | Q02223 | CC | Receptor for TNFSF13B/BLyS/BAFF and TNFSF13/APRIL                                                                                                                                                                      |
| N | Q02223 | CC | Activates NF-kappa-B and JNK.                                                                                                                                                                                          |
| N | Q02223 | CC | Promotes B-cell survival and plays a role in the regulation of humoral immunity                                                                                                                                        |
| N | Q02223 | DE | B-cell maturation protein;                                                                                                                                                                                             |
| N | Q02223 | DE | CD269;                                                                                                                                                                                                                 |
| N | Q02223 | DE | Tumor necrosis factor receptor superfamily member 17;                                                                                                                                                                  |
| N | Q02223 | DR | cell proliferation                                                                                                                                                                                                     |
| N | Q02223 | DR | multicellular organismal development                                                                                                                                                                                   |
| N | Q02283 | CC | Probable transcription activator involved in leaf development                                                                                                                                                          |
| N | Q02283 | CC | Binds to the DNA sequence 5'-CAAT[AT]ATTG-3'.                                                                                                                                                                          |
| N | Q02283 | DE | HD-ZIP protein 5;                                                                                                                                                                                                      |
| N | Q02283 | DE | HD-ZIP protein ATHB-1;                                                                                                                                                                                                 |
| N | Q02283 | DE | Homeobox-leucine zipper protein HAT5;                                                                                                                                                                                  |
| N | Q02283 | DE | Homeodomain transcription factor ATHB-1;                                                                                                                                                                               |
| N | Q02283 | DE | Homeodomain-leucine zipper protein HAT5;                                                                                                                                                                               |
| N | Q02283 | DR | leaf morphogenesis                                                                                                                                                                                                     |
| N | Q02283 | DR | protein homodimerization activity                                                                                                                                                                                      |
| N | Q02283 | DR | regulation of transcription, DNA-dependent                                                                                                                                                                             |
| N | Q02283 | DR | response to blue light                                                                                                                                                                                                 |
| N | Q02283 | DR | response to salt stress                                                                                                                                                                                                |
| N | Q02283 | DR | sequence-specific DNA binding                                                                                                                                                                                          |
| N | Q02283 | DR | sequence-specific DNA binding transcription factor activity                                                                                                                                                            |
| N | Q02283 | DR | transcription activator activity                                                                                                                                                                                       |
| N | Q02586 | DE | Polyketide synthase CurC;                                                                                                                                                                                              |
| N | Q02586 | DR | antibiotic biosynthetic process                                                                                                                                                                                        |
| N | Q02655 | CC | Component of the ubiquinol-cytochrome c reductase complex (complex III or cytochrome b-c1 complex), which is a respiratory chain that generates an electrochemical potential coupled to ATP synthesis (By similarity). |
| N | Q02655 | DE | Complex III subunit 3;                                                                                                                                                                                                 |
| N | Q02655 | DE | Complex III subunit III;                                                                                                                                                                                               |
| N | Q02655 | DE | Cytochrome b-c1 complex subunit 3;                                                                                                                                                                                     |
| N | Q02655 | DE | Cytochrome b;                                                                                                                                                                                                          |
| N | Q02655 | DE | Ubiquinol-cytochrome-c reductase complex cytochrome b subunit;                                                                                                                                                         |
| N | Q02655 | DR | electron carrier activity                                                                                                                                                                                              |
| N | Q02655 | DR | metal ion binding                                                                                                                                                                                                      |
| N | Q02655 | DR | oxidoreductase activity                                                                                                                                                                                                |
| N | Q02655 | DR | respiratory electron transport chain                                                                                                                                                                                   |
| N | Q02831 | DE | Uncharacterized protein YPL077C;                                                                                                                                                                                       |
| N | Q02831 | DR | protein binding                                                                                                                                                                                                        |
| N | Q02843 | CC | Matrix protein p1 / targets Gag and Gag-Pro polypeptides to the plasma membrane via a multipartite membrane binding signal, that includes its unstructured N terminus                                                  |
| N | Q02843 | CC | Nucleocapsid protein p7 encapsulates and protects viral dimeric unspliced (genomic) RNA                                                                                                                                |
| N | Q02843 | CC | Also mediates nuclear localization of the preintegration complex                                                                                                                                                       |
| N | Q02843 | CC | Binds these RNAs through its zinc fingers (By similarity).                                                                                                                                                             |
| N | Q02843 | CC | Implicated in the release from host cell mediated by Vpu (By similarity).                                                                                                                                              |
| N | Q02843 | DE | Capsid protein p24;                                                                                                                                                                                                    |
| N | Q02843 | DE | Gag polyprotein;                                                                                                                                                                                                       |
| N | Q02843 | DE | Matrix protein p17;                                                                                                                                                                                                    |
| N | Q02843 | DE | Nucleocapsid protein p7;                                                                                                                                                                                               |
| N | Q02843 | DE | Spacer peptide p1;                                                                                                                                                                                                     |
| N | Q02843 | DE | Spacer peptide p2;                                                                                                                                                                                                     |
| N | Q02843 | DR | interspecies interaction between organisms                                                                                                                                                                             |
| N | Q02843 | DR | structural molecule activity                                                                                                                                                                                           |
| N | Q02843 | DR | viral reproduction                                                                                                                                                                                                     |
| N | Q02843 | DR | zinc ion binding                                                                                                                                                                                                       |
| N | Q02879 | CC | General transcription factor that functions at the core of the DNA-binding multiprotein factor TFIID                                                                                                                   |

|   |        |    |                                                                                                                                                                                                                                    |
|---|--------|----|------------------------------------------------------------------------------------------------------------------------------------------------------------------------------------------------------------------------------------|
| N | Q02879 | CC | Binding of TFIID to the TATA box is the initial transcriptional step of the pre-initiation complex (PIC), playing a role in the activation of eukaryotic genes transcribed by RNA polymerase II.                                   |
| N | Q02879 | DE | TATA sequence-binding protein 2;                                                                                                                                                                                                   |
| N | Q02879 | DE | TATA-binding factor 2;                                                                                                                                                                                                             |
| N | Q02879 | DE | TATA-box factor 2;                                                                                                                                                                                                                 |
| N | Q02879 | DE | TATA-box-binding protein 2;                                                                                                                                                                                                        |
| N | Q02879 | DE | Transcription initiation factor TFIID TBP-2 subunit;                                                                                                                                                                               |
| N | Q02879 | DR | RNA polymerase II transcription factor activity                                                                                                                                                                                    |
| N | Q02879 | DR | regulation of transcription, DNA-dependent                                                                                                                                                                                         |
| N | Q02879 | DR | transcription initiation from RNA polymerase II promoter                                                                                                                                                                           |
| N | Q02DL4 | DE | Homoserine kinase;                                                                                                                                                                                                                 |
| N | Q02DL4 | DR | homoserine kinase activity                                                                                                                                                                                                         |
| N | Q02DL4 | DR | threonine biosynthetic process                                                                                                                                                                                                     |
| N | Q02FV2 | DE | Sugar fermentation stimulation protein homolog;                                                                                                                                                                                    |
| N | Q02HR9 | CC | Required for accurate and efficient protein synthesis under certain stress conditions                                                                                                                                              |
| N | Q02HR9 | CC | Back- translocation proceeds from a post-translocation (POST) complex to a pre-translocation (PRE) complex, thus giving elongation factor G a second chance to translocate the tRNAs correctly                                     |
| N | Q02HR9 | CC | Binds to ribosomes in a GTP-dependent manner (By similarity).                                                                                                                                                                      |
| N | Q02HR9 | CC | May act as a fidelity factor of the translation reaction, by catalyzing a one-codon backward translocation of tRNAs on improperly translocated ribosomes                                                                           |
| N | Q02HR9 | DE | Elongation factor 4;                                                                                                                                                                                                               |
| N | Q02HR9 | DE | Ribosomal back-translocase LepA;                                                                                                                                                                                                   |
| N | Q02HR9 | DR | GTPase activity                                                                                                                                                                                                                    |
| N | Q02JE0 | DE | UPF0260 protein PA14_47410;                                                                                                                                                                                                        |
| N | Q02R72 | DE | 50S ribosomal protein L36 2;                                                                                                                                                                                                       |
| N | Q02R72 | DR | structural constituent of ribosome                                                                                                                                                                                                 |
| N | Q02TR5 | CC | Catalyzes the decarboxylative condensation of pimeloyl-CoA and L-alanine to produce 8-amino-7-oxononanoate (AON), coenzyme A, and carbon dioxide (By similarity)                                                                   |
| N | Q02TR5 | DE | 7-KAP synthase;                                                                                                                                                                                                                    |
| N | Q02TR5 | DE | 7-keto-8-amino-pelargonic acid synthase;                                                                                                                                                                                           |
| N | Q02TR5 | DE | 8-amino-7-ketopelargonate synthase;                                                                                                                                                                                                |
| N | Q02TR5 | DE | 8-amino-7-oxononanoate synthase;                                                                                                                                                                                                   |
| N | Q02TR5 | DE | KAPA synthase;                                                                                                                                                                                                                     |
| N | Q02TR5 | DE | L-alanine--pimeloyl-CoA ligase;                                                                                                                                                                                                    |
| N | Q02TR5 | DR | 8-amino-7-oxononanoate synthase activity                                                                                                                                                                                           |
| N | Q02TR5 | DR | biotin biosynthetic process                                                                                                                                                                                                        |
| N | Q02TR5 | DR | pyridoxal phosphate binding                                                                                                                                                                                                        |
| N | Q02TR5 | DR | transferase activity, transferring nitrogenous groups                                                                                                                                                                              |
| N | Q02ZY9 | CC | Specifically methylates the N4 position of cytidine in position 1402 (C1402) of 16S rRNA (By similarity).                                                                                                                          |
| N | Q02ZY9 | DE | 16S rRNA m(4)C1402 methyltransferase;                                                                                                                                                                                              |
| N | Q02ZY9 | DE | Ribosomal RNA small subunit methyltransferase H;                                                                                                                                                                                   |
| N | Q02ZY9 | DE | rRNA (cytosine-N(4)-)-methyltransferase RsmH;                                                                                                                                                                                      |
| N | Q02ZY9 | DR | methyltransferase activity                                                                                                                                                                                                         |
| N | Q02ZY9 | DR | rRNA processing                                                                                                                                                                                                                    |
| N | Q030Z9 | CC | Participates in both the initiation and recycling phases of transcription                                                                                                                                                          |
| N | Q030Z9 | CC | In the presence of the delta subunit, RNAP displays an increased specificity of transcription, a decreased affinity for nucleic acids, and an increased efficiency of RNA synthesis because of enhanced recycling (By similarity). |
| N | Q030Z9 | DE | Probable DNA-directed RNA polymerase subunit delta;                                                                                                                                                                                |
| N | Q030Z9 | DE | RNAP delta factor;                                                                                                                                                                                                                 |
| N | Q030Z9 | DR | DNA-directed RNA polymerase activity                                                                                                                                                                                               |
| N | Q03133 | DE | 6-deoxyerythronolide B synthase III;                                                                                                                                                                                               |
| N | Q03133 | DE | Erythronolide synthase, modules 5 and 6;                                                                                                                                                                                           |
| N | Q03133 | DR | acyl carrier activity                                                                                                                                                                                                              |
| N | Q03133 | DR | acyltransferase activity                                                                                                                                                                                                           |
| N | Q03133 | DR | antibiotic biosynthetic process                                                                                                                                                                                                    |
| N | Q03133 | DR | cofactor binding                                                                                                                                                                                                                   |
| N | Q03133 | DR | erythronolide synthase activity                                                                                                                                                                                                    |
| N | Q03133 | DR | hydrolase activity, acting on ester bonds                                                                                                                                                                                          |
| N | Q03133 | DR | oxidoreductase activity                                                                                                                                                                                                            |
| N | Q03133 | DR | phosphopantetheine binding                                                                                                                                                                                                         |
| N | Q03191 | CC | Involved in the maintenance and repair of the intestinal mucosa                                                                                                                                                                    |

|   |        |    |                                                                                                                                                                                                                          |
|---|--------|----|--------------------------------------------------------------------------------------------------------------------------------------------------------------------------------------------------------------------------|
| N | Q03191 | CC | promotes the mobility of epidermal cells in healing processes (motogen) (By similarity)                                                                                                                                  |
| N | Q03191 | DE | Intestinal trefoil factor;                                                                                                                                                                                               |
| N | Q03191 | DE | Polypeptide P1.B;                                                                                                                                                                                                        |
| N | Q03191 | DE | Trefoil factor 3;                                                                                                                                                                                                        |
| N | Q03191 | DR | response to peptide hormone stimulus                                                                                                                                                                                     |
| N | Q03191 | DR | wound healing                                                                                                                                                                                                            |
| N | Q03196 | DE | Cysteine proteinase inhibitor;                                                                                                                                                                                           |
| N | Q03196 | DR | cysteine-type endopeptidase inhibitor activity                                                                                                                                                                           |
| N | Q03196 | DR | response to stress                                                                                                                                                                                                       |
| N | Q03522 | CC | Cell wall formation                                                                                                                                                                                                      |
| N | Q03522 | CC | Catalyzes the addition of glutamate to the nucleotide precursor UDP-N-acetylmuramoyl-L-alanine (UMA) (By similarity).                                                                                                    |
| N | Q03522 | DE | D-glutamic acid-adding enzyme;                                                                                                                                                                                           |
| N | Q03522 | DE | UDP-N-acetylmuramoyl-L-alanyl-D-glutamate synthetase;                                                                                                                                                                    |
| N | Q03522 | DE | UDP-N-acetylmuramoylalanine--D-glutamate ligase;                                                                                                                                                                         |
| N | Q03522 | DR | UDP-N-acetylmuramoylalanine-D-glutamate ligase activity                                                                                                                                                                  |
| N | Q03522 | DR | cell division                                                                                                                                                                                                            |
| N | Q03522 | DR | cellular cell wall organization                                                                                                                                                                                          |
| N | Q03522 | DR | peptidoglycan biosynthetic process                                                                                                                                                                                       |
| N | Q03522 | DR | regulation of cell shape                                                                                                                                                                                                 |
| N | Q03E93 | CC | Catalyzes the hydrolysis of both 2',3'-cyclic AMP and 2',3'-cyclic GMP into 3'-AMP and 3'-GMP, respectively, at the 3'- terminal of RNA (By similarity).                                                                 |
| N | Q03E93 | DE | 2',3'-cyclic-nucleotide 2'-phosphodiesterase 2;                                                                                                                                                                          |
| N | Q03E93 | DR | 2',3'-cyclic-nucleotide 2'-phosphodiesterase activity                                                                                                                                                                    |
| N | Q03EB0 | CC | DNA-dependent RNA polymerase catalyzes the transcription of DNA into RNA using the four ribonucleoside triphosphates as substrates.                                                                                      |
| N | Q03EB0 | DE | DNA-directed RNA polymerase subunit beta';                                                                                                                                                                               |
| N | Q03EB0 | DE | RNA polymerase subunit beta';                                                                                                                                                                                            |
| N | Q03EB0 | DE | RNAP subunit beta';                                                                                                                                                                                                      |
| N | Q03EB0 | DE | Transcriptase subunit beta';                                                                                                                                                                                             |
| N | Q03EB0 | DR | DNA-directed RNA polymerase activity                                                                                                                                                                                     |
| N | Q03F22 | CC | One of the primary rRNA binding proteins, it binds directly to 16S rRNA where it helps nucleate assembly of the platform of the 30S subunit by binding and bridging several RNA helices of the 16S rRNA (By similarity). |
| N | Q03F22 | DE | 30S ribosomal protein S15;                                                                                                                                                                                               |
| N | Q03F22 | DR | structural constituent of ribosome                                                                                                                                                                                       |
| N | Q03F28 | CC | Necessary for normal cell division and for the maintenance of normal septation (By similarity).                                                                                                                          |
| N | Q03F28 | DE | Probable GTP-binding protein EngB;                                                                                                                                                                                       |
| N | Q03F28 | DR | barrier septum formation                                                                                                                                                                                                 |
| N | Q03FW3 | CC | Specifically methylates guanosine-37 in various tRNAs (By similarity).                                                                                                                                                   |
| N | Q03FW3 | DE | M1G-methyltransferase;                                                                                                                                                                                                   |
| N | Q03FW3 | DE | tRNA (guanine-N(1)-)-methyltransferase;                                                                                                                                                                                  |
| N | Q03FW3 | DE | tRNA [GM37] methyltransferase;                                                                                                                                                                                           |
| N | Q03FW3 | DR | tRNA (guanine-N1-)-methyltransferase activity                                                                                                                                                                            |
| N | Q03GC2 | CC | Involved in base excision repair of DNA damaged by oxidation or by mutagenic agents                                                                                                                                      |
| N | Q03GC2 | CC | Acts as DNA glycosylase that recognizes and removes damaged bases                                                                                                                                                        |
| N | Q03GC2 | CC | Cleaves the DNA backbone by beta-delta elimination to generate a single-strand break at the site of the removed base with both 3'- and 5'-phosphates (By similarity)                                                     |
| N | Q03GC2 | CC | Has AP (apurinic/apyrimidinic) lyase activity and introduces nicks in the DNA                                                                                                                                            |
| N | Q03GC2 | CC | Has a preference for oxidized purines, such as 7,8-dihydro-2-oxoguanine (8-oxo-dG)                                                                                                                                       |
| N | Q03GC2 | DE | AP lyase mutM;                                                                                                                                                                                                           |
| N | Q03GC2 | DE | DNA-(apurinic or apyrimidinic site) lyase mutM;                                                                                                                                                                          |
| N | Q03GC2 | DE | Fapy-DNA glycosylase;                                                                                                                                                                                                    |
| N | Q03GC2 | DE | Formamidopyrimidine-DNA glycosylase;                                                                                                                                                                                     |
| N | Q03GC2 | DR | base-excision repair                                                                                                                                                                                                     |
| N | Q03GC2 | DR | damaged DNA binding                                                                                                                                                                                                      |
| N | Q03GC2 | DR | nucleotide-excision repair                                                                                                                                                                                               |
| N | Q03GC2 | DR | oxidized purine base lesion DNA N-glycosylase activity                                                                                                                                                                   |
| N | Q03GC2 | DR | zinc ion binding                                                                                                                                                                                                         |
| N | Q03H06 | CC | Binds to Cpn60 in the presence of Mg-ATP and suppresses the ATPase activity of the latter.                                                                                                                               |
| N | Q03H06 | DE | 10 kDa chaperonin;                                                                                                                                                                                                       |
| N | Q03H06 | DE | GroES protein;                                                                                                                                                                                                           |
| N | Q03H06 | DE | Protein Cpn10;                                                                                                                                                                                                           |

|   |        |    |                                                                                                                                                                                                                                                                                    |
|---|--------|----|------------------------------------------------------------------------------------------------------------------------------------------------------------------------------------------------------------------------------------------------------------------------------------|
| N | Q03H06 | DR | protein folding                                                                                                                                                                                                                                                                    |
| N | Q03I91 | CC | Binds to the 23S rRNA (By similarity).                                                                                                                                                                                                                                             |
| N | Q03I91 | DE | 50S ribosomal protein L9;                                                                                                                                                                                                                                                          |
| N | Q03I91 | DR | structural constituent of ribosome<br>Allows the formation of correctly charged Asn-tRNA(Asn) or Gln-tRNA(Gln) through the transamidation of misacylated Asp- tRNA(Asn) or Glu-tRNA(Gln) in organisms which lack either or both of asparaginyl-tRNA or glutaminyl-tRNA synthetases |
| N | Q03J80 | CC | The reaction takes place in the presence of glutamine and ATP through an activated phospho-Asp-tRNA(Asn) or phospho-Glu-tRNA(Gln) (By similarity).                                                                                                                                 |
| N | Q03J80 | DE | Asp/Glu-ADT subunit C;                                                                                                                                                                                                                                                             |
| N | Q03J80 | DE | Aspartyl/glutamyl-tRNA(Asn/Gln) amidotransferase subunit C;                                                                                                                                                                                                                        |
| N | Q03J80 | DR | ligase activity                                                                                                                                                                                                                                                                    |
| N | Q03J80 | DR | regulation of translational fidelity                                                                                                                                                                                                                                               |
| N | Q03PV4 | CC | Catalyzes the GTP-dependent ribosomal translocation step during translation elongation                                                                                                                                                                                             |
| N | Q03PV4 | CC | Catalyzes the coordinated movement of the two tRNA molecules, the mRNA and conformational changes in the ribosome (By similarity).                                                                                                                                                 |
| N | Q03PV4 | CC | During this step, the ribosome changes from the pre-translocational (PRE) to the post- translocational (POST) state as the newly formed A-site-bound peptidyl-tRNA and P-site-bound deacylated tRNA move to the P and E sites, respectively                                        |
| N | Q03PV4 | DE | Elongation factor G;                                                                                                                                                                                                                                                               |
| N | Q03PV4 | DR | GTPase activity                                                                                                                                                                                                                                                                    |
| N | Q03PV4 | DR | translation elongation factor activity                                                                                                                                                                                                                                             |
| N | Q03S45 | DE | Formate--tetrahydrofolate ligase;                                                                                                                                                                                                                                                  |
| N | Q03S45 | DE | Formyltetrahydrofolate synthetase;                                                                                                                                                                                                                                                 |
| N | Q03S45 | DR | folic acid-containing compound biosynthetic process                                                                                                                                                                                                                                |
| N | Q03S45 | DR | formate-tetrahydrofolate ligase activity                                                                                                                                                                                                                                           |
| N | Q03S45 | DR | one-carbon metabolic process                                                                                                                                                                                                                                                       |
| N | Q03SR1 | CC | Modulates transcription in response to changes in cellular NADH/NAD(+) redox state (By similarity).                                                                                                                                                                                |
| N | Q03SR1 | DE | Redox-sensing transcriptional repressor rex;                                                                                                                                                                                                                                       |
| N | Q03SR1 | DR | catalytic activity                                                                                                                                                                                                                                                                 |
| N | Q03SR1 | DR | response to redox state                                                                                                                                                                                                                                                            |
| N | Q03SR1 | DR | transcription repressor activity                                                                                                                                                                                                                                                   |
| N | Q043R9 | CC | Endonuclease that specifically degrades the RNA of RNA- DNA hybrids (By similarity).                                                                                                                                                                                               |
| N | Q043R9 | DE | Ribonuclease HII;                                                                                                                                                                                                                                                                  |
| N | Q043R9 | DR | metal ion binding                                                                                                                                                                                                                                                                  |
| N | Q043R9 | DR | ribonuclease H activity                                                                                                                                                                                                                                                            |
| N | Q04418 | CC | Forms an interface between the RNA polymerase II enzyme and chaperone/scaffolding proteins, suggesting that it is required to connect RNA polymerase II to regulators of protein complex formation (By similarity).                                                                |
| N | Q04418 | DE | RNA polymerase II-associated protein RBA50;                                                                                                                                                                                                                                        |
| N | Q04418 | DE | RNA polymerase II-associated protein of 50 kDa;                                                                                                                                                                                                                                    |
| N | Q04418 | DR | protein binding                                                                                                                                                                                                                                                                    |
| N | Q04418 | DR | transcription from RNA polymerase II promoter                                                                                                                                                                                                                                      |
| N | Q04451 | CC | Catalyzes the attachment of glycine to tRNA(Gly)                                                                                                                                                                                                                                   |
| N | Q04451 | CC | Is also able produce diadenosine tetraphosphate (Ap4A), a universal pleiotropic signaling molecule needed for cell regulation pathways, by direct condensation of 2 ATPs (By similarity).                                                                                          |
| N | Q04451 | DE | AP-4-A synthetase;                                                                                                                                                                                                                                                                 |
| N | Q04451 | DE | Diadenosine tetraphosphate synthetase;                                                                                                                                                                                                                                             |
| N | Q04451 | DE | Glycine--tRNA ligase;                                                                                                                                                                                                                                                              |
| N | Q04451 | DE | Glycyl-tRNA synthetase;                                                                                                                                                                                                                                                            |
| N | Q04451 | DR | diadenosine tetraphosphate biosynthetic process                                                                                                                                                                                                                                    |
| N | Q04451 | DR | glycine-tRNA ligase activity                                                                                                                                                                                                                                                       |
| N | Q04451 | DR | glycyl-tRNA aminoacylation                                                                                                                                                                                                                                                         |
| N | Q04451 | DR | protein dimerization activity                                                                                                                                                                                                                                                      |
| N | Q046C2 | CC | One of the primary rRNA binding proteins                                                                                                                                                                                                                                           |
| N | Q046C2 | CC | It has been suggested to have peptidyltransferase activity; this is somewhat controversial                                                                                                                                                                                         |
| N | Q046C2 | CC | Makes several contacts with the 16S rRNA in the 70S ribosome (By similarity).                                                                                                                                                                                                      |
| N | Q046C2 | CC | Required for association of the 30S and 50S subunits to form the 70S ribosome, for tRNA binding and peptide bond formation                                                                                                                                                         |
| N | Q046C2 | DE | 50S ribosomal protein L2;                                                                                                                                                                                                                                                          |
| N | Q046C2 | DR | structural constituent of ribosome                                                                                                                                                                                                                                                 |
| N | Q046C2 | DR | transferase activity                                                                                                                                                                                                                                                               |



|   |        |    |                                                                                                                                                                                       |
|---|--------|----|---------------------------------------------------------------------------------------------------------------------------------------------------------------------------------------|
| N | Q04749 | CC | Component of TORC2, which regulates cell cycle-dependent polarization of the actin-cytoskeleton and cell wall integrity                                                               |
| N | Q04749 | CC | TORC2 controls polarity of the actin cytoskeleton, which is required for orienting the secretory pathway toward discrete growth sites, via the RHO1/PKC1/MAPK cell integrity pathway. |
| N | Q04749 | DE | Adheres voraciously to TOR2 protein 2;                                                                                                                                                |
| N | Q04749 | DE | TORC2 subunit AVO2;                                                                                                                                                                   |
| N | Q04749 | DE | Target of rapamycin complex 2 subunit AVO2;                                                                                                                                           |
| N | Q04749 | DR | TOR signaling cascade                                                                                                                                                                 |
| N | Q04749 | DR | establishment or maintenance of actin cytoskeleton polarity                                                                                                                           |
| N | Q04749 | DR | fungus-type cell wall organization                                                                                                                                                    |
| N | Q04749 | DR | protein binding                                                                                                                                                                       |
| N | Q04749 | DR | regulation of cell growth                                                                                                                                                             |
| N | Q04785 | CC | Gp-1b, a surface membrane protein of platelets, participates in the formation of platelet plugs by binding to von Willebrand factor, which is already bound to the subendothelium     |
| N | Q04785 | DE | Antigen CD42b-beta;                                                                                                                                                                   |
| N | Q04785 | DE | CD42c;                                                                                                                                                                                |
| N | Q04785 | DE | GP-1b beta;                                                                                                                                                                           |
| N | Q04785 | DE | Platelet glycoprotein Ib beta chain;                                                                                                                                                  |
| N | Q04785 | DR | blood coagulation                                                                                                                                                                     |
| N | Q04785 | DR | cell adhesion                                                                                                                                                                         |
| N | Q04851 | DE | Outer surface protein A;                                                                                                                                                              |
| N | Q04C21 | CC | DNA-dependent RNA polymerase catalyzes the transcription of DNA into RNA using the four ribonucleoside triphosphates as substrates.                                                   |
| N | Q04C21 | DE | DNA-directed RNA polymerase subunit beta';                                                                                                                                            |
| N | Q04C21 | DE | RNA polymerase subunit beta';                                                                                                                                                         |
| N | Q04C21 | DE | RNAP subunit beta';                                                                                                                                                                   |
| N | Q04C21 | DE | Transcriptase subunit beta';                                                                                                                                                          |
| N | Q04C21 | DR | DNA-directed RNA polymerase activity                                                                                                                                                  |
| N | Q04EG2 | DE | UPF0173 metal-dependent hydrolase OE0E_1287;                                                                                                                                          |
| N | Q04EG2 | DR | hydrolase activity                                                                                                                                                                    |
| N | Q04FP6 | CC | An accessory protein needed during the final step in the assembly of 30S ribosomal subunit, possibly for assembly of the head region                                                  |
| N | Q04FP6 | CC | Essential for efficient processing of 16S rRNA                                                                                                                                        |
| N | Q04FP6 | CC | It has affinity for free ribosomal 30S subunits but not for 70S ribosomes (by similarity)                                                                                             |
| N | Q04FP6 | CC | May be needed both before and after rbfA during the maturation of 16S rRNA                                                                                                            |
| N | Q04FP6 | CC | Probably interacts with S19                                                                                                                                                           |
| N | Q04FP6 | DE | Ribosome maturation factor rimM;                                                                                                                                                      |
| N | Q04FP6 | DR | rRNA processing                                                                                                                                                                       |
| N | Q04FP6 | DR | ribosome binding                                                                                                                                                                      |
| N | Q04GA9 | CC | May be required for sporulation (By similarity).                                                                                                                                      |
| N | Q04GA9 | DE | Putative sporulation transcription regulator whiA;                                                                                                                                    |
| N | Q04GM3 | CC | Catalyzes the attachment of serine to tRNA(Ser)                                                                                                                                       |
| N | Q04GM3 | CC | Is also able to aminoacylate tRNA(Sec) with serine, to form the misacylated tRNA L-seryl-tRNA(Sec), which will be further converted into selenocysteinyl-tRNA(Sec) (By similarity).   |
| N | Q04GM3 | DE | Serine--tRNA ligase;                                                                                                                                                                  |
| N | Q04GM3 | DE | Seryl-tRNA synthetase;                                                                                                                                                                |
| N | Q04GM3 | DE | Seryl-tRNA(Ser/Sec) synthetase;                                                                                                                                                       |
| N | Q04GM3 | DR | serine-tRNA ligase activity                                                                                                                                                           |
| N | Q04GM3 | DR | seryl-tRNA aminoacylation                                                                                                                                                             |
| N | Q04IN8 | CC | Sulfhydryl-activated toxin that causes cytolysis by forming pores in cholesterol containing host membranes                                                                            |
| N | Q04IN8 | CC | After binding to target membranes, the protein undergoes a major conformation change, leading to its insertion in the host membrane and formation of an oligomeric pore complex       |
| N | Q04IN8 | CC | Can be reversibly inactivated by oxidation (By similarity).                                                                                                                           |
| N | Q04IN8 | CC | Cholesterol may be required for binding to host membranes, membrane insertion and pore formation                                                                                      |
| N | Q04IN8 | DE | Pneumolysin;                                                                                                                                                                          |
| N | Q04IN8 | DE | Thiol-activated cytolysin;                                                                                                                                                            |
| N | Q04IN8 | DR | cholesterol binding                                                                                                                                                                   |
| N | Q04IN8 | DR | hemolysis in other organism                                                                                                                                                           |
| N | Q04M96 | DE | UPF0398 protein SPD_0338;                                                                                                                                                             |
| N | Q04ZG7 | DE | Threonine--tRNA ligase;                                                                                                                                                               |
| N | Q04ZG7 | DE | Threonyl-tRNA synthetase;                                                                                                                                                             |

|   |        |    |                                                                                                                                                                                                                                                                            |
|---|--------|----|----------------------------------------------------------------------------------------------------------------------------------------------------------------------------------------------------------------------------------------------------------------------------|
| N | Q04ZG7 | DR | metal ion binding                                                                                                                                                                                                                                                          |
| N | Q04ZG7 | DR | threonine-tRNA ligase activity                                                                                                                                                                                                                                             |
| N | Q04ZG7 | DR | threonyl-tRNA aminoacylation                                                                                                                                                                                                                                               |
| N | Q04ZS1 | CC | GTPase that plays an essential role in the late steps of ribosome biogenesis (By similarity).                                                                                                                                                                              |
| N | Q04ZS1 | DE | GTP-binding protein EngA;                                                                                                                                                                                                                                                  |
| N | Q04ZS1 | DR | ribosome biogenesis                                                                                                                                                                                                                                                        |
| N | Q05059 | CC | Envelope glycoprotein that binds to the potential host cell entry receptors TNFRSF14/HVEM, PVRL1 and 3-O-sulfated heparan sulfate                                                                                                                                          |
| N | Q05059 | CC | May trigger fusion with host membrane, by recruiting the fusion machinery composed of gB and gH/gL (By similarity).                                                                                                                                                        |
| N | Q05059 | DE | Envelope glycoprotein D;                                                                                                                                                                                                                                                   |
| N | Q05059 | DR | interspecies interaction between organisms                                                                                                                                                                                                                                 |
| N | Q05059 | DR | metal ion binding                                                                                                                                                                                                                                                          |
| N | Q05203 | CC | Flagellin is the subunit protein which polymerizes to form the filaments of bacterial flagella.                                                                                                                                                                            |
| N | Q05203 | DR | ciliary or flagellar motility                                                                                                                                                                                                                                              |
| N | Q05203 | DR | structural molecule activity                                                                                                                                                                                                                                               |
| N | Q05283 | DE | Gene 69 protein;                                                                                                                                                                                                                                                           |
| N | Q05291 | DE | Gene 76 protein;                                                                                                                                                                                                                                                           |
| N | Q05397 | CC | Non-receptor protein-tyrosine kinase implicated in signaling pathways involved in cell motility, proliferation and apoptosis                                                                                                                                               |
| N | Q05397 | CC | Activated by tyrosine-phosphorylation in response to either integrin clustering induced by cell adhesion or antibody cross-linking, or via G-protein coupled receptor (GPCR) occupancy by ligands such as bombesin or lysophosphatidic acid, or via LDL receptor occupancy |
| N | Q05397 | CC | Microtubule-induced dephosphorylation at Tyr- 397 is crucial for the induction of focal adhesion disassembly                                                                                                                                                               |
| N | Q05397 | CC | plays a potential role in oncogenic transformations resulting in increased kinase activity.                                                                                                                                                                                |
| N | Q05397 | DE | Focal adhesion kinase 1;                                                                                                                                                                                                                                                   |
| N | Q05397 | DE | Protein-tyrosine kinase 2;                                                                                                                                                                                                                                                 |
| N | Q05397 | DR | SH2 domain binding                                                                                                                                                                                                                                                         |
| N | Q05397 | DR | axon guidance                                                                                                                                                                                                                                                              |
| N | Q05397 | DR | blood coagulation                                                                                                                                                                                                                                                          |
| N | Q05397 | DR | cellular component disassembly involved in apoptosis                                                                                                                                                                                                                       |
| N | Q05397 | DR | integrin-mediated signaling pathway                                                                                                                                                                                                                                        |
| N | Q05397 | DR | non-membrane spanning protein tyrosine kinase activity                                                                                                                                                                                                                     |
| N | Q05397 | DR | protein phosphorylation                                                                                                                                                                                                                                                    |
| N | Q05397 | DR | signal complex assembly                                                                                                                                                                                                                                                    |
| N | Q05397 | DR | signal transducer activity                                                                                                                                                                                                                                                 |
| N | Q053M7 | CC | Catalyzes the attachment of proline to tRNA(Pro) in a two-step reaction: proline is first activated by ATP to form Pro- AMP and then transferred to the acceptor end of tRNA(Pro)                                                                                          |
| N | Q053M7 | CC | As ProRS can inadvertently accommodate and process non-cognate amino acids such as alanine and cysteine, to avoid such errors it has two additional distinct editing activities against alanine                                                                            |
| N | Q053M7 | CC | One activity is designated as 'pretransfer' editing and involves the tRNA(Pro)-independent hydrolysis of activated Ala-AMP                                                                                                                                                 |
| N | Q053M7 | CC | The misacylated Cys- tRNA(Pro) is not edited by ProRS (By similarity).                                                                                                                                                                                                     |
| N | Q053M7 | CC | The other activity is designated 'posttransfer' editing and involves deacylation of mischarged Ala-tRNA(Pro)                                                                                                                                                               |
| N | Q053M7 | DE | Proline--tRNA ligase;                                                                                                                                                                                                                                                      |
| N | Q053M7 | DE | Prolyl-tRNA synthetase;                                                                                                                                                                                                                                                    |
| N | Q053M7 | DR | proline-tRNA ligase activity                                                                                                                                                                                                                                               |
| N | Q053M7 | DR | prolyl-tRNA aminoacylation                                                                                                                                                                                                                                                 |
| N | Q057A7 | CC | One of the primary rRNA binding proteins                                                                                                                                                                                                                                   |
| N | Q057A7 | CC | it has been suggested to have peptidyltransferase activity; this is somewhat controversial                                                                                                                                                                                 |
| N | Q057A7 | CC | Makes several contacts with the 16S rRNA in the 70S ribosome (By similarity).                                                                                                                                                                                              |
| N | Q057A7 | CC | Required for association of the 30S and 50S subunits to form the 70S ribosome, for tRNA binding and peptide bond formation                                                                                                                                                 |
| N | Q057A7 | DE | 50S ribosomal protein L2;                                                                                                                                                                                                                                                  |
| N | Q057A7 | DR | structural constituent of ribosome                                                                                                                                                                                                                                         |
| N | Q057A7 | DR | transferase activity                                                                                                                                                                                                                                                       |

|   |        |    |                                                                                                                                                                                                                                   |
|---|--------|----|-----------------------------------------------------------------------------------------------------------------------------------------------------------------------------------------------------------------------------------|
| N | Q05800 | CC | RuBisCO catalyzes two reactions: the carboxylation of D- ribulose 1,5-bisphosphate, the primary event in carbon dioxide fixation, as well as the oxidative fragmentation of the pentose substrate in the photorespiration process |
| N | Q05800 | CC | Both reactions occur simultaneously and in competition at the same active site (By similarity).                                                                                                                                   |
| N | Q05800 | DE | Ribulose biphosphate carboxylase large chain;                                                                                                                                                                                     |
| N | Q05800 | DE | RuBisCO large subunit;                                                                                                                                                                                                            |
| N | Q05800 | DR | magnesium ion binding                                                                                                                                                                                                             |
| N | Q05800 | DR | monooxygenase activity                                                                                                                                                                                                            |
| N | Q05800 | DR | oxidation-reduction process                                                                                                                                                                                                       |
| N | Q05800 | DR | photorespiration                                                                                                                                                                                                                  |
| N | Q05800 | DR | reductive pentose-phosphate cycle                                                                                                                                                                                                 |
| N | Q05800 | DR | ribulose-bisphosphate carboxylase activity                                                                                                                                                                                        |
| N | Q05858 | CC | Is important for morphogenesis of limb and kidney and may be involved in determining dorsoventral neural tube polarity and motor neuron induction                                                                                 |
| N | Q05858 | CC | It may also have a function in differentiated cells or be involved in maintaining specific differentiated states.                                                                                                                 |
| N | Q05858 | DE | Limb deformity protein;                                                                                                                                                                                                           |
| N | Q05858 | DR | actin binding                                                                                                                                                                                                                     |
| N | Q05858 | DR | actin cytoskeleton organization                                                                                                                                                                                                   |
| N | Q05979 | CC | Catalyzes the cleavage of L-kynurenine (L-Kyn) and L-3- hydroxykynurenine (L-3OHKyn) into anthranilic acid (AA) and 3- hydroxyanthranilic acid (3-OHAA), respectively.                                                            |
| N | Q05979 | DE | Biosynthesis of nicotinic acid protein 5;                                                                                                                                                                                         |
| N | Q05979 | DE | Kynureninase;                                                                                                                                                                                                                     |
| N | Q05979 | DE | L-kynurenine hydrolase;                                                                                                                                                                                                           |
| N | Q05979 | DR | de novo NAD biosynthetic process from tryptophan                                                                                                                                                                                  |
| N | Q05979 | DR | kynureninase activity                                                                                                                                                                                                             |
| N | Q05979 | DR | protein binding                                                                                                                                                                                                                   |
| N | Q05979 | DR | pyridoxal phosphate binding                                                                                                                                                                                                       |
| N | Q05979 | DR | tryptophan catabolic process                                                                                                                                                                                                      |
| N | Q05985 | CC | RuBisCO catalyzes two reactions: the carboxylation of D- ribulose 1,5-bisphosphate, the primary event in carbon dioxide fixation, as well as the oxidative fragmentation of the pentose substrate in the photorespiration process |
| N | Q05985 | CC | Both reactions occur simultaneously and in competition at the same active site (By similarity).                                                                                                                                   |
| N | Q05985 | DE | Ribulose biphosphate carboxylase large chain;                                                                                                                                                                                     |
| N | Q05985 | DE | RuBisCO large subunit;                                                                                                                                                                                                            |
| N | Q05985 | DR | magnesium ion binding                                                                                                                                                                                                             |
| N | Q05985 | DR | monooxygenase activity                                                                                                                                                                                                            |
| N | Q05985 | DR | oxidation-reduction process                                                                                                                                                                                                       |
| N | Q05985 | DR | photorespiration                                                                                                                                                                                                                  |
| N | Q05985 | DR | reductive pentose-phosphate cycle                                                                                                                                                                                                 |
| N | Q05985 | DR | ribulose-bisphosphate carboxylase activity                                                                                                                                                                                        |
| N | Q06177 | DE | Translation machinery-associated protein 10;                                                                                                                                                                                      |
| N | Q06749 | CC | Depolymerizes alginate by cleaving the beta-1,4 glycosidic bond                                                                                                                                                                   |
| N | Q06749 | CC | May enhance the production of alginate by controlling the length of the polymer chain during export.                                                                                                                              |
| N | Q06749 | DE | Alginate lyase;                                                                                                                                                                                                                   |
| N | Q06749 | DE | Poly(beta-D-mannuronate) lyase;                                                                                                                                                                                                   |
| N | Q06749 | DE | Poly(mana) alginate lyase;                                                                                                                                                                                                        |
| N | Q06749 | DR | alginic acid catabolic process                                                                                                                                                                                                    |
| N | Q06749 | DR | poly(beta-D-mannuronate) lyase activity                                                                                                                                                                                           |
| N | Q06GM7 | DE | 30S ribosomal protein S11, chloroplastic;                                                                                                                                                                                         |
| N | Q06GM7 | DR | structural constituent of ribosome                                                                                                                                                                                                |
| N | Q06GR9 | CC | DNA-dependent RNA polymerase catalyzes the transcription of DNA into RNA using the four ribonucleoside triphosphates as substrates.                                                                                               |
| N | Q06GR9 | DE | DNA-directed RNA polymerase subunit beta';                                                                                                                                                                                        |
| N | Q06GR9 | DE | Plastid-encoded RNA polymerase subunit beta';                                                                                                                                                                                     |
| N | Q06GR9 | DE | RNA polymerase subunit beta';                                                                                                                                                                                                     |
| N | Q06GR9 | DR | DNA-directed RNA polymerase activity                                                                                                                                                                                              |
| N | Q06GT7 | CC | One of the primary rRNA binding proteins, it binds directly to 16S rRNA where it nucleates assembly of the head domain of the 30S subunit (By similarity).                                                                        |
| N | Q06GT7 | DE | 30S ribosomal protein S7, chloroplastic;                                                                                                                                                                                          |
| N | Q06GT7 | DR | structural constituent of ribosome                                                                                                                                                                                                |

|   |        |    |                                                                                                                                                                                                                                                           |
|---|--------|----|-----------------------------------------------------------------------------------------------------------------------------------------------------------------------------------------------------------------------------------------------------------|
| N | Q06R94 | DE | 50S ribosomal protein L16, chloroplastic;                                                                                                                                                                                                                 |
| N | Q06R94 | DR | structural constituent of ribosome                                                                                                                                                                                                                        |
| N | Q06RD2 | CC | PsaA and psaB bind P700, the primary electron donor of photosystem I (PSI), as well as the electron acceptors A0, A1 and FX                                                                                                                               |
| N | Q06RD2 | CC | Oxidized P700 is reduced on the lumenal side of the thylakoid membrane by PSII                                                                                                                                                                            |
| N | Q06RD2 | CC | PSI is a plastocyanin-ferredoxin oxidoreductase, converting photonic excitation into a charge separation, which transfers an electron from the donor P700 chlorophyll pair to the spectroscopically characterized acceptors A0, A1, FX, FA and FB in turn |
| N | Q06RD2 | DE | Photosystem I P700 chlorophyll a apoprotein A2;                                                                                                                                                                                                           |
| N | Q06RD2 | DR | 4 iron, 4 sulfur cluster binding                                                                                                                                                                                                                          |
| N | Q06RD2 | DR | chlorophyll binding                                                                                                                                                                                                                                       |
| N | Q06RD2 | DR | electron transport chain                                                                                                                                                                                                                                  |
| N | Q06RD2 | DR | metal ion binding                                                                                                                                                                                                                                         |
| N | Q06RD2 | DR | photosynthesis                                                                                                                                                                                                                                            |
| N | Q06RD2 | DR | protein-chromophore linkage                                                                                                                                                                                                                               |
| N | Q06RD6 | CC | One of the two reaction center proteins of photosystem II (PSII), D2 is needed for assembly of a stable PSII complex (By similarity).                                                                                                                     |
| N | Q06RD6 | DE | PSII D2 protein;                                                                                                                                                                                                                                          |
| N | Q06RD6 | DE | Photosystem II D2 protein;                                                                                                                                                                                                                                |
| N | Q06RD6 | DE | Photosystem Q(A) protein;                                                                                                                                                                                                                                 |
| N | Q06RD6 | DR | electron transporter, transferring electrons within the cyclic electron transport pathway of photosynthesis activity                                                                                                                                      |
| N | Q06RD6 | DR | metal ion binding                                                                                                                                                                                                                                         |
| N | Q06RD6 | DR | photosynthetic electron transport in photosystem II                                                                                                                                                                                                       |
| N | Q07251 | DE | L-lactate dehydrogenase;                                                                                                                                                                                                                                  |
| N | Q07251 | DR | L-lactate dehydrogenase activity                                                                                                                                                                                                                          |
| N | Q07251 | DR | oxidation-reduction process                                                                                                                                                                                                                               |
| N | Q07351 | DE | Zinc finger protein STP4;                                                                                                                                                                                                                                 |
| N | Q07351 | DR | sequence-specific DNA binding                                                                                                                                                                                                                             |
| N | Q07351 | DR | zinc ion binding                                                                                                                                                                                                                                          |
| N | Q07409 | CC | Contactins mediate cell surface interactions during nervous system development                                                                                                                                                                            |
| N | Q07409 | CC | Has some neurite outgrowth-promoting activity (By similarity).                                                                                                                                                                                            |
| N | Q07409 | DE | Brain-derived immunoglobulin superfamily protein 1;                                                                                                                                                                                                       |
| N | Q07409 | DE | Contactin-3;                                                                                                                                                                                                                                              |
| N | Q07409 | DE | Plasmacytoma-associated neuronal glycoprotein;                                                                                                                                                                                                            |
| N | Q07409 | DR | cell adhesion                                                                                                                                                                                                                                             |
| N | Q07590 | CC | Not yet known, shows ATPase activity.                                                                                                                                                                                                                     |
| N | Q07590 | DE | Protein SAV;                                                                                                                                                                                                                                              |
| N | Q07590 | DR | nucleoside-triphosphatase activity                                                                                                                                                                                                                        |
| N | Q07788 | DE | Protein COS7;                                                                                                                                                                                                                                             |
| N | Q07788 | DR | protein binding                                                                                                                                                                                                                                           |
| N | Q07788 | DR | receptor activity                                                                                                                                                                                                                                         |
| N | Q07DX6 | CC | Plays a central role during spermatogenesis by repressing transposable elements and prevent their mobilization, which is essential for the germline integrity                                                                                             |
| N | Q07DX6 | CC | Acts via the piRNA metabolic process, which mediates the repression of transposable elements during meiosis by forming complexes composed of piRNAs and Piwi proteins and govern the methylation and subsequent repression of transposons                 |
| N | Q07DX6 | CC | Its association with pi-bodies suggests a participation in the primary piRNAs metabolic process                                                                                                                                                           |
| N | Q07DX6 | CC | May act by mediating protein-protein interactions during germ cell maturation (By similarity).                                                                                                                                                            |
| N | Q07DX6 | CC | Required prior to the pachytene stage to facilitate the production of multiple types of piRNAs, including those associated with repeats involved in regulation of retrotransposons                                                                        |
| N | Q07DX6 | DE | Ankyrin repeat, SAM and basic leucine zipper domain-containing protein 1;                                                                                                                                                                                 |
| N | Q07DX6 | DE | Ceritin cer-specific ankyrin, SAM and basic leucine zipper domain-containing protein                                                                                                                                                                      |
| N | Q07DX6 | DR | DNA methylation involved in gamete generation                                                                                                                                                                                                             |
| N | Q07DX6 | DR | cell differentiation                                                                                                                                                                                                                                      |
| N | Q07DX6 | DR | gene silencing by RNA                                                                                                                                                                                                                                     |
| N | Q07DX6 | DR | multicellular organismal development                                                                                                                                                                                                                      |
| N | Q07DX6 | DR | piRNA metabolic process                                                                                                                                                                                                                                   |
| N | Q07DX6 | DR | spermatogenesis                                                                                                                                                                                                                                           |
| N | Q07TB7 | CC | Prevents misfolding and promotes the refolding and proper assembly of unfolded polypeptides generated under stress conditions (By similarity).                                                                                                            |
| N | Q07TB7 | DE | 60 kDa chaperonin 1;                                                                                                                                                                                                                                      |

|   |        |    |                                                                                                                                                                                                                          |
|---|--------|----|--------------------------------------------------------------------------------------------------------------------------------------------------------------------------------------------------------------------------|
| N | Q07TB7 | DE | GroEL protein 1;                                                                                                                                                                                                         |
| N | Q07TB7 | DE | Protein Cpn60 1;                                                                                                                                                                                                         |
| N | Q07TB7 | DR | protein refolding                                                                                                                                                                                                        |
| N | Q07Z00 | CC | Transfers the 4'-phosphopantetheine moiety from coenzyme A to a Ser of acyl-carrier-protein (By similarity).                                                                                                             |
| N | Q07Z00 | DE | 4'-phosphopantetheinyl transferase AcpS;                                                                                                                                                                                 |
| N | Q07Z00 | DE | Holo-ACP synthase;                                                                                                                                                                                                       |
| N | Q07Z00 | DE | Holo-[acyl-carrier-protein] synthase;                                                                                                                                                                                    |
| N | Q07Z00 | DR | fatty acid biosynthetic process                                                                                                                                                                                          |
| N | Q07Z00 | DR | holo-[acyl-carrier-protein] synthase activity                                                                                                                                                                            |
| N | Q07Z00 | DR | macromolecule biosynthetic process                                                                                                                                                                                       |
| N | Q07Z00 | DR | magnesium ion binding                                                                                                                                                                                                    |
| N | Q08094 | CC | Thin filament-associated protein that is implicated in the regulation and modulation of smooth muscle contraction                                                                                                        |
| N | Q08094 | CC | It is capable of binding to actin, calmodulin, troponin C and tropomyosin                                                                                                                                                |
| N | Q08094 | CC | The interaction of calponin with actin inhibits the actomyosin Mg-ATPase activity.                                                                                                                                       |
| N | Q08094 | DE | Calponin H2, smooth muscle;                                                                                                                                                                                              |
| N | Q08094 | DE | Neutral calponin;                                                                                                                                                                                                        |
| N | Q08094 | DR | actin binding                                                                                                                                                                                                            |
| N | Q08094 | DR | actomyosin structure organization                                                                                                                                                                                        |
| N | Q08094 | DR | calmodulin binding                                                                                                                                                                                                       |
| N | Q08143 | CC | Transcription factor that is required for post- fertilization events                                                                                                                                                     |
| N | Q08143 | CC | It is required for the developmental events that occur in the female organ after fertilization.                                                                                                                          |
| N | Q08143 | DE | Sporulation minus regulator 2;                                                                                                                                                                                           |
| N | Q08143 | DR | single fertilization                                                                                                                                                                                                     |
| N | Q08455 | CC | Plays an essential role for the viral pathogenicity.                                                                                                                                                                     |
| N | Q08455 | DE | Non-virion protein;                                                                                                                                                                                                      |
| N | Q08477 | CC | Cytochromes P450 are a group of heme-thiolate monooxygenases                                                                                                                                                             |
| N | Q08477 | CC | This enzyme requires molecular oxygen and NADPH for the omega-hydroxylation of LTB4, a potent chemoattractant for polymorphonuclear leukocytes                                                                           |
| N | Q08477 | DE | Cytochrome P450 4F3;                                                                                                                                                                                                     |
| N | Q08477 | DE | Cytochrome P450-LTB-omega;                                                                                                                                                                                               |
| N | Q08477 | DE | Leukotriene-B(4) 20-monooxygenase 2;                                                                                                                                                                                     |
| N | Q08477 | DE | Leukotriene-B(4) omega-hydroxylase 2;                                                                                                                                                                                    |
| N | Q08477 | DR | electron carrier activity                                                                                                                                                                                                |
| N | Q08477 | DR | leukotriene metabolic process                                                                                                                                                                                            |
| N | Q08477 | DR | leukotriene-B4 20-monooxygenase activity                                                                                                                                                                                 |
| N | Q08477 | DR | oxidation-reduction process                                                                                                                                                                                              |
| N | Q08477 | DR | oxygen binding                                                                                                                                                                                                           |
| N | Q08477 | DR | xenobiotic metabolic process                                                                                                                                                                                             |
| N | Q08585 | CC | The light-harvesting complex (LHC) functions as a light receptor, it captures and delivers excitation energy to photosystems with which it is closely associated                                                         |
| N | Q08585 | CC | Energy is transferred from the carotenoid and chlorophyll C (or B) to chlorophyll A and the photosynthetic reaction centers where it is used to synthesize ATP and reducing power.                                       |
| N | Q08585 | DE | Fucoxanthin-chlorophyll a-c binding protein B, chloroplastic;                                                                                                                                                            |
| N | Q08585 | DR | chlorophyll binding                                                                                                                                                                                                      |
| N | Q08585 | DR | photosynthesis                                                                                                                                                                                                           |
| N | Q08585 | DR | protein-chromophore linkage                                                                                                                                                                                              |
| N | Q086G9 | CC | One of the primary rRNA binding proteins, it binds directly to 16S rRNA where it helps nucleate assembly of the platform of the 30S subunit by binding and bridging several RNA helices of the 16S rRNA (By similarity). |
| N | Q086G9 | DE | 30S ribosomal protein S15;                                                                                                                                                                                               |
| N | Q086G9 | DR | structural constituent of ribosome                                                                                                                                                                                       |
| N | Q089N8 | CC | This is one of the proteins that binds and probably mediates the attachment of the 5S RNA into the large ribosomal subunit, where it forms part of the central protuberance (By similarity).                             |
| N | Q089N8 | DE | 50S ribosomal protein L18;                                                                                                                                                                                               |
| N | Q089N8 | DR | structural constituent of ribosome                                                                                                                                                                                       |
| N | Q08CA1 | DE | UPF0580 protein C15orf58 homolog;                                                                                                                                                                                        |
| N | Q08DM1 | CC | Actin-bundling protein                                                                                                                                                                                                   |
| N | Q08DM1 | CC | May function in mitogen- activated protein kinase pathway (By similarity).                                                                                                                                               |
| N | Q08DM1 | DE | Erythrocyte membrane protein band 4.9;                                                                                                                                                                                   |
| N | Q08DM1 | DR | actin binding                                                                                                                                                                                                            |

|   |        |    |                                                                                                                                                                                                                                                  |
|---|--------|----|--------------------------------------------------------------------------------------------------------------------------------------------------------------------------------------------------------------------------------------------------|
| N | Q08DM1 | DR | actin filament capping                                                                                                                                                                                                                           |
| N | Q08DM1 | DR | cytoskeleton organization                                                                                                                                                                                                                        |
| N | Q08DT6 | DE | 39S ribosomal protein L47, mitochondrial;                                                                                                                                                                                                        |
| N | Q08DT6 | DR | structural constituent of ribosome                                                                                                                                                                                                               |
| N | Q08HI0 | CC | Core subunit of the mitochondrial membrane respiratory chain NADH dehydrogenase (Complex I) that is believed to belong to the minimal assembly                                                                                                   |
| N | Q08HI0 | CC | Complex I functions in the transfer of electrons from NADH to the respiratory chain                                                                                                                                                              |
| N | Q08HI0 | CC | The immediate electron acceptor for the enzyme is believed to be ubiquinone (By similarity).                                                                                                                                                     |
| N | Q08HI0 | DE | NADH dehydrogenase subunit 4L;                                                                                                                                                                                                                   |
| N | Q08HI0 | DE | NADH-ubiquinone oxidoreductase chain 4L;                                                                                                                                                                                                         |
| N | Q08HI0 | DR | ATP synthesis coupled electron transport                                                                                                                                                                                                         |
| N | Q08HI0 | DR | NADH dehydrogenase (ubiquinone) activity                                                                                                                                                                                                         |
| N | Q09113 | CC | Spike-forming protein that mediates virion attachment to the host epithelial cell receptors and plays a major role in cell penetration, determination of host range restriction and virulence                                                    |
| N | Q09113 | CC | VP8* forms the head of the spikes                                                                                                                                                                                                                |
| N | Q09113 | CC | According to the considered strain, VP4 seems to essentially target sialic acid and/or the integrin heterodimer ITGA2/ITGB1 (By similarity).                                                                                                     |
| N | Q09113 | CC | In sialic acid-dependent strains, VP8* binds to host cell sialic acid, most probably a ganglioside, providing the initial contact (By similarity).                                                                                               |
| N | Q09113 | CC | It is the viral hemagglutinin and an important target of neutralizing antibodies                                                                                                                                                                 |
| N | Q09113 | CC | Rotavirus entry into the host cell probably involves multiple sequential contacts between the outer capsid proteins VP4 and VP7, and the cell receptors                                                                                          |
| N | Q09113 | DE | Hemagglutinin;                                                                                                                                                                                                                                   |
| N | Q09113 | DE | Outer capsid protein VP4;                                                                                                                                                                                                                        |
| N | Q09113 | DE | Outer capsid protein VP5*;                                                                                                                                                                                                                       |
| N | Q09113 | DE | Outer capsid protein VP8*;                                                                                                                                                                                                                       |
| N | Q09113 | DR | interspecies interaction between organisms                                                                                                                                                                                                       |
| N | Q09113 | DR | viral infectious cycle                                                                                                                                                                                                                           |
| N | Q09123 | DE | Fructokinase;                                                                                                                                                                                                                                    |
| N | Q09123 | DR | cellular carbohydrate catabolic process                                                                                                                                                                                                          |
| N | Q09123 | DR | fructokinase activity                                                                                                                                                                                                                            |
| N | Q09123 | DR | metal ion binding                                                                                                                                                                                                                                |
| N | Q09125 | CC | RuBisCO catalyzes two reactions: the carboxylation of D- ribulose 1,5-bisphosphate, the primary event in carbon dioxide fixation, as well as the oxidative fragmentation of the pentose substrate                                                |
| N | Q09125 | CC | Both reactions occur simultaneously and in competition at the same active site (By similarity).                                                                                                                                                  |
| N | Q09125 | DE | Ribulose bisphosphate carboxylase small chain;                                                                                                                                                                                                   |
| N | Q09125 | DE | RuBisCO small subunit;                                                                                                                                                                                                                           |
| N | Q09125 | DR | monooxygenase activity                                                                                                                                                                                                                           |
| N | Q09125 | DR | oxidation-reduction process                                                                                                                                                                                                                      |
| N | Q09125 | DR | photorespiration                                                                                                                                                                                                                                 |
| N | Q09125 | DR | reductive pentose-phosphate cycle                                                                                                                                                                                                                |
| N | Q09125 | DR | ribulose-bisphosphate carboxylase activity                                                                                                                                                                                                       |
| N | Q09248 | CC | Modulates cytoplasmic dynein binding to an organelle, and plays a role in prometaphase chromosome alignment and spindle organization during mitosis                                                                                              |
| N | Q09248 | CC | May play a role in synapse formation during brain development (By similarity).                                                                                                                                                                   |
| N | Q09248 | DE | Probable dynactin subunit 2;                                                                                                                                                                                                                     |
| N | Q09248 | DR | centrosomal and pronuclear rotation                                                                                                                                                                                                              |
| N | Q09248 | DR | chromosome segregation                                                                                                                                                                                                                           |
| N | Q09248 | DR | embryo development ending in birth or egg hatching                                                                                                                                                                                               |
| N | Q09248 | DR | establishment of mitotic spindle orientation                                                                                                                                                                                                     |
| N | Q09248 | DR | identical protein binding                                                                                                                                                                                                                        |
| N | Q09248 | DR | motor activity                                                                                                                                                                                                                                   |
| N | Q09248 | DR | pronuclear migration                                                                                                                                                                                                                             |
| N | Q09343 | DE | Uncharacterized protein W02B3.7;                                                                                                                                                                                                                 |
| N | Q09354 | DE | Uncharacterized protein T15H9.4;                                                                                                                                                                                                                 |
| N | Q09508 | CC | Flavoprotein (FP) subunit of succinate dehydrogenase (SDH) that is involved in complex II of the mitochondrial electron transport chain and is responsible for transferring electrons from succinate to ubiquinone (coenzyme Q) (By similarity). |
| N | Q09508 | DE | Flavoprotein subunit of complex II;                                                                                                                                                                                                              |
| N | Q09508 | DE | Succinate dehydrogenase [ubiquinone] flavoprotein subunit, mitochondrial;                                                                                                                                                                        |
| N | Q09508 | DR | body morphogenesis                                                                                                                                                                                                                               |

|   |        |    |                                                                                                                                                                                    |
|---|--------|----|------------------------------------------------------------------------------------------------------------------------------------------------------------------------------------|
| N | Q09508 | DR | electron carrier activity                                                                                                                                                          |
| N | Q09508 | DR | electron transport chain                                                                                                                                                           |
| N | Q09508 | DR | embryo development ending in birth or egg hatching                                                                                                                                 |
| N | Q09508 | DR | flavin adenine dinucleotide binding                                                                                                                                                |
| N | Q09508 | DR | positive regulation of growth rate                                                                                                                                                 |
| N | Q09508 | DR | succinate dehydrogenase (ubiquinone) activity                                                                                                                                      |
| N | Q09508 | DR | tricarboxylic acid cycle                                                                                                                                                           |
| N | Q09531 | CC | GTPase-activating protein for the ADP ribosylation factor family (Potential).                                                                                                      |
| N | Q09531 | DE | Uncharacterized protein F07F6.4;                                                                                                                                                   |
| N | Q09531 | DR | ARF GTPase activator activity                                                                                                                                                      |
| N | Q09531 | DR | regulation of ARF GTPase activity                                                                                                                                                  |
| N | Q09531 | DR | zinc ion binding                                                                                                                                                                   |
| N | Q09651 | DE | Coiled-coil domain-containing protein 130 homolog;                                                                                                                                 |
| N | Q09651 | DR | embryo development ending in birth or egg hatching                                                                                                                                 |
| N | Q09651 | DR | protein binding                                                                                                                                                                    |
| N | Q09675 | DE | Uncharacterized protein C5H10.02c;                                                                                                                                                 |
| N | Q09675 | DR | cellular response to oxidative stress                                                                                                                                              |
| N | Q09675 | DR | peptidase activity                                                                                                                                                                 |
| N | Q09898 | CC | Part of a signaling pathway                                                                                                                                                        |
| N | Q09898 | CC | Required for initiation of medial ring constriction and septation.                                                                                                                 |
| N | Q09898 | DE | Serine/threonine-protein kinase sid2;                                                                                                                                              |
| N | Q09898 | DR | maintenance of endoplasmic reticulum location involved in endoplasmic reticulum polarization at cell division site                                                                 |
| N | Q09898 | DR | protein binding                                                                                                                                                                    |
| N | Q09898 | DR | protein phosphorylation                                                                                                                                                            |
| N | Q09898 | DR | protein serine/threonine kinase activity                                                                                                                                           |
| N | Q09898 | DR | septation initiation signaling cascade                                                                                                                                             |
| N | Q09G39 | CC | PRODUCES ATP FROM ADP IN THE PRESENCE OF A PROTON GRADIENT ACROSS THE MEMBRANE.                                                                                                    |
| N | Q09G39 | CC | The catalytic sites are hosted primarily by the beta subunits (By similarity).                                                                                                     |
| N | Q09G39 | DE | ATP synthase F1 sector subunit beta;                                                                                                                                               |
| N | Q09G39 | DE | ATP synthase subunit beta, chloroplastic;                                                                                                                                          |
| N | Q09G39 | DE | F-ATPase subunit beta;                                                                                                                                                             |
| N | Q09G39 | DR | ATP hydrolysis coupled proton transport                                                                                                                                            |
| N | Q09G39 | DR | ATP synthesis coupled proton transport                                                                                                                                             |
| N | Q09G39 | DR | hydrogen ion transporting ATP synthase activity, rotational mechanism                                                                                                              |
| N | Q09G39 | DR | hydrogen-exporting ATPase activity, phosphorylative mechanism                                                                                                                      |
| N | Q09G39 | DR | proton-transporting ATPase activity, rotational mechanism                                                                                                                          |
| N | Q09MC9 | CC | NDH shuttles electrons from NAD(P)H:plastoquinone, via FMN and iron-sulfur (Fe-S) centers, to quinones in the photosynthetic chain and possibly in a chloroplast respiratory chain |
| N | Q09MC9 | CC | Couples the redox reaction to proton translocation, and thus conserves the redox energy in a proton gradient (By similarity).                                                      |
| N | Q09MC9 | CC | The immediate electron acceptor for the enzyme in this species is believed to be plastoquinone                                                                                     |
| N | Q09MC9 | DE | NAD(P)H dehydrogenase subunit 5;                                                                                                                                                   |
| N | Q09MC9 | DE | NAD(P)H-quinone oxidoreductase subunit 5, chloroplastic;                                                                                                                           |
| N | Q09MC9 | DE | NADH-plastoquinone oxidoreductase subunit 5;                                                                                                                                       |
| N | Q09MC9 | DR | ATP synthesis coupled electron transport                                                                                                                                           |
| N | Q09MC9 | DR | NADH dehydrogenase (ubiquinone) activity                                                                                                                                           |
| N | Q09MC9 | DR | quinone binding                                                                                                                                                                    |
| N | Q0A5S1 | DE | Dihydrodipicolinate synthase;                                                                                                                                                      |
| N | Q0A5S1 | DR | diaminopimelate biosynthetic process                                                                                                                                               |
| N | Q0A5S1 | DR | dihydrodipicolinate synthase activity                                                                                                                                              |
| N | Q0ABG4 | CC | One of two assembly initiator proteins, it binds directly to the 5'-end of the 23S rRNA, where it nucleates assembly of the 50S subunit (By similarity).                           |
| N | Q0ABG4 | DE | 50S ribosomal protein L24;                                                                                                                                                         |
| N | Q0ABG4 | DR | structural constituent of ribosome                                                                                                                                                 |
| N | Q0ADD7 | CC | Specifically methylates the N7 position of guanosine in position 527 of 16S rRNA (By similarity).                                                                                  |
| N | Q0ADD7 | DE | 16S rRNA 7-methylguanosine methyltransferase;                                                                                                                                      |
| N | Q0ADD7 | DE | 16S rRNA m7G methyltransferase;                                                                                                                                                    |
| N | Q0ADD7 | DE | Ribosomal RNA small subunit methyltransferase G;                                                                                                                                   |
| N | Q0ADD7 | DR | rRNA methyltransferase activity                                                                                                                                                    |
| N | Q0AGQ8 | CC | Specifically dimethylates two adjacent adenosines (A1518 and A1519) in the loop of a conserved hairpin near the 3'-end of 16S rRNA in the 30S particle                             |

|   |        |    |                                                                                                                                                                                                                                                                                                    |
|---|--------|----|----------------------------------------------------------------------------------------------------------------------------------------------------------------------------------------------------------------------------------------------------------------------------------------------------|
| N | Q0AGQ8 | CC | May play a critical role in biogenesis of 30S subunits (By similarity).                                                                                                                                                                                                                            |
| N | Q0AGQ8 | DE | 16S rRNA (adenine(1518)-N(6)/adenine(1519)-N(6))-dimethyltransferase;                                                                                                                                                                                                                              |
| N | Q0AGQ8 | DE | 16S rRNA dimethyladenosine transferase;                                                                                                                                                                                                                                                            |
| N | Q0AGQ8 | DE | 16S rRNA dimethylase;                                                                                                                                                                                                                                                                              |
| N | Q0AGQ8 | DE | Ribosomal RNA small subunit methyltransferase A;                                                                                                                                                                                                                                                   |
| N | Q0AGQ8 | DE | S-adenosylmethionine-6-N', N'-adenosyl(rRNA) dimethyltransferase;                                                                                                                                                                                                                                  |
| N | Q0AGQ8 | DR | rRNA (adenine-N6,N6-)-dimethyltransferase activity<br>This enzyme is involved in nucleotide metabolism: it produces dUMP, the immediate precursor of thymidine nucleotides and it decreases the intracellular concentration of dUTP so that uracil cannot be incorporated into DNA (By similarity) |
| N | Q0AHX8 | CC |                                                                                                                                                                                                                                                                                                    |
| N | Q0AHX8 | DE | Deoxyuridine 5'-triphosphate nucleotidohydrolase;                                                                                                                                                                                                                                                  |
| N | Q0AHX8 | DE | dUTP pyrophosphatase;                                                                                                                                                                                                                                                                              |
| N | Q0AHX8 | DR | dUTP diphosphatase activity                                                                                                                                                                                                                                                                        |
| N | Q0AHX8 | DR | dUTP metabolic process                                                                                                                                                                                                                                                                             |
| N | Q0AHX8 | DR | metal ion binding                                                                                                                                                                                                                                                                                  |
| N | Q0AIA2 | CC | One of the proteins required for the normal export of preproteins out of the cell cytoplasm                                                                                                                                                                                                        |
| N | Q0AIA2 | CC | It also specifically binds to its receptor secA (By similarity).                                                                                                                                                                                                                                   |
| N | Q0AIA2 | CC | It is a molecular chaperone that binds to a subset of precursor proteins, maintaining them in a translocation-competent state                                                                                                                                                                      |
| N | Q0AIA2 | DE | Protein-export protein secB;                                                                                                                                                                                                                                                                       |
| N | Q0AIA2 | DR | protein tetramerization                                                                                                                                                                                                                                                                            |
| N | Q0AIA2 | DR | protein transport                                                                                                                                                                                                                                                                                  |
| N | Q0AIA2 | DR | transmembrane transport                                                                                                                                                                                                                                                                            |
| N | Q0AIA2 | DR | unfolded protein binding<br>required for the formation of a threonylcarbamoyl group on adenosine at position 37 (t(6)A37) in tRNAs that read codons beginning with adenine (By similarity)                                                                                                         |
| N | Q0AJ91 | CC |                                                                                                                                                                                                                                                                                                    |
| N | Q0AJ91 | DE | Probable tRNA threonylcarbamoyladenine biosynthesis protein Gcp;                                                                                                                                                                                                                                   |
| N | Q0AJ91 | DE | t(6)A37 threonylcarbamoyladenine biosynthesis protein;                                                                                                                                                                                                                                             |
| N | Q0AJ91 | DR | metal ion binding                                                                                                                                                                                                                                                                                  |
| N | Q0AJ91 | DR | metalloendopeptidase activity                                                                                                                                                                                                                                                                      |
| N | Q0AWZ8 | CC | Involved in the modulation of the chemotaxis system; catalyzes the demethylation of specific methylglutamate residues introduced into the chemoreceptors (methyl-accepting chemotaxis proteins) by CheR (By similarity).                                                                           |
| N | Q0AWZ8 | DE | Chemotaxis response regulator protein-glutamate methyltransferase 3;                                                                                                                                                                                                                               |
| N | Q0AWZ8 | DR | protein-glutamate methyltransferase activity                                                                                                                                                                                                                                                       |
| N | Q0AWZ8 | DR | regulation of transcription, DNA-dependent                                                                                                                                                                                                                                                         |
| N | Q0AWZ8 | DR | two-component response regulator activity                                                                                                                                                                                                                                                          |
| N | Q0AZ84 | CC | Catalyzes the synthesis of the hydroxymethylpyrimidine phosphate (HMP-P) moiety of thiamine from aminoimidazole ribotide (AIR) in a radical S-adenosyl-L-methionine (SAM)-dependent reaction (By similarity).                                                                                      |
| N | Q0AZ84 | DE | HMP-P synthase;                                                                                                                                                                                                                                                                                    |
| N | Q0AZ84 | DE | HMP-phosphate synthase;                                                                                                                                                                                                                                                                            |
| N | Q0AZ84 | DE | HMPP synthase;                                                                                                                                                                                                                                                                                     |
| N | Q0AZ84 | DE | Hydroxymethylpyrimidine phosphate synthase;                                                                                                                                                                                                                                                        |
| N | Q0AZ84 | DE | Phosphomethylpyrimidine synthase;                                                                                                                                                                                                                                                                  |
| N | Q0AZ84 | DE | Thiamine biosynthesis protein thiC;                                                                                                                                                                                                                                                                |
| N | Q0AZ84 | DR | 4 iron, 4 sulfur cluster binding                                                                                                                                                                                                                                                                   |
| N | Q0AZ84 | DR | lyase activity                                                                                                                                                                                                                                                                                     |
| N | Q0AZ84 | DR | metal ion binding                                                                                                                                                                                                                                                                                  |
| N | Q0AZ84 | DR | thiamine biosynthetic process                                                                                                                                                                                                                                                                      |
| N | Q0BC36 | CC | Key enzyme in the regulation of glycerol uptake and metabolism.                                                                                                                                                                                                                                    |
| N | Q0BC36 | DE | ATP:glycerol 3-phosphotransferase;                                                                                                                                                                                                                                                                 |
| N | Q0BC36 | DE | Glycerokinase;                                                                                                                                                                                                                                                                                     |
| N | Q0BC36 | DE | Glycerol kinase;                                                                                                                                                                                                                                                                                   |
| N | Q0BC36 | DR | glycerol kinase activity                                                                                                                                                                                                                                                                           |
| N | Q0BC36 | DR | glycerol-3-phosphate metabolic process                                                                                                                                                                                                                                                             |
| N | Q0BED6 | CC | Catalyzes the formation of 4-diphosphocytidyl-2-C- methyl-D-erythritol from CTP and 2-C-methyl-D-erythritol 4- phosphate (MEP) (By similarity).                                                                                                                                                    |
| N | Q0BED6 | DE | 2-C-methyl-D-erythritol 4-phosphate cytidyltransferase;                                                                                                                                                                                                                                            |
| N | Q0BED6 | DE | 4-diphosphocytidyl-2C-methyl-D-erythritol synthase;                                                                                                                                                                                                                                                |
| N | Q0BED6 | DE | MEP cytidyltransferase;                                                                                                                                                                                                                                                                            |
| N | Q0BED6 | DR | 2-C-methyl-D-erythritol 4-phosphate cytidyltransferase activity                                                                                                                                                                                                                                    |
| N | Q0BED6 | DR | isoprenoid biosynthetic process                                                                                                                                                                                                                                                                    |
| N | Q0BEG9 | CC | Involved in cell division, probably involved in mitacental separation (By similarity)                                                                                                                                                                                                              |



|   |        |    |                                                                                                                                                                                 |
|---|--------|----|---------------------------------------------------------------------------------------------------------------------------------------------------------------------------------|
| N | Q0BEG9 | DE | Probable intracellular septation protein;                                                                                                                                       |
| N | Q0BEG9 | DR | barrier septum formation                                                                                                                                                        |
| N | Q0BH18 | CC | Catalyzes the reversible formation of acyl-phosphate (acyl-PO(4)) from acyl-[acyl-carrier-protein] (acyl-ACP)                                                                   |
| N | Q0BH18 | CC | This enzyme utilizes acyl-ACP as fatty acyl donor, but not acyl-CoA (By similarity)                                                                                             |
| N | Q0BH18 | DE | Acyl-ACP phosphotransacylase;                                                                                                                                                   |
| N | Q0BH18 | DE | Acyl-[acyl-carrier-protein]--phosphate acyltransferase;                                                                                                                         |
| N | Q0BH18 | DE | Phosphate acyltransferase;                                                                                                                                                      |
| N | Q0BH18 | DE | Phosphate-acyl-ACP acyltransferase;                                                                                                                                             |
| N | Q0BH18 | DR | fatty acid biosynthetic process                                                                                                                                                 |
| N | Q0BH18 | DR | phospholipid biosynthetic process                                                                                                                                               |
| N | Q0BH18 | DR | transferase activity, transferring acyl groups other than amino-acyl groups                                                                                                     |
| N | Q0BLS0 | DE | UPF0176 protein FTH_1091;                                                                                                                                                       |
| N | Q0BMM0 | CC | Provides the sole de novo source of dTMP for DNA biosynthesis (By similarity).                                                                                                  |
| N | Q0BMM0 | DE | Thymidylate synthase;                                                                                                                                                           |
| N | Q0BMM0 | DR | dTMP biosynthetic process                                                                                                                                                       |
| N | Q0BMM0 | DR | thymidylate synthase activity                                                                                                                                                   |
| N | Q0BNQ2 | DE | 50S ribosomal protein L17;                                                                                                                                                      |
| N | Q0BNQ2 | DR | structural constituent of ribosome                                                                                                                                              |
| N | Q0BNT0 | CC | One of the primary rRNA binding proteins, it binds directly to 16S rRNA where it nucleates assembly of the head domain of the 30S subunit                                       |
| N | Q0BNT0 | CC | Is located at the subunit interface close to the decoding center, probably blocks exit of the E-site tRNA (By similarity).                                                      |
| N | Q0BNT0 | DE | 30S ribosomal protein S7;                                                                                                                                                       |
| N | Q0BNT0 | DR | structural constituent of ribosome                                                                                                                                              |
| N | Q0BRE9 | CC | An essential GTPase which binds GTP, GDP and possibly (p)ppGpp with moderate affinity, with high nucleotide exchange rates and a fairly low GTP hydrolysis rate (By similarity) |
| N | Q0BRE9 | CC | It may play a role in control of the cell cycle, stress response, ribosome biogenesis and in those bacteria that undergo differentiation, in morphogenesis control (Potential)  |
| N | Q0BRE9 | DE | GTP-binding protein obg;                                                                                                                                                        |
| N | Q0BRE9 | DR | GTPase activity                                                                                                                                                                 |
| N | Q0BRE9 | DR | magnesium ion binding                                                                                                                                                           |
| N | Q0BTF8 | CC | May conjugate Arg from its aminoacyl-tRNA to the N- termini of proteins containing an N-terminal aspartate or glutamate (Potential).                                            |
| N | Q0BTF8 | DE | Arginyltransferase;                                                                                                                                                             |
| N | Q0BTF8 | DE | Putative arginyl-tRNA--protein transferase;                                                                                                                                     |
| N | Q0BTF8 | DE | R-transferase;                                                                                                                                                                  |
| N | Q0BTF8 | DR | acyltransferase activity                                                                                                                                                        |
| N | Q0BTF8 | DR | arginyltransferase activity                                                                                                                                                     |
| N | Q0BTF8 | DR | protein arginylation                                                                                                                                                            |
| N | Q0C9R3 | CC | Component of the EKC/KEOPS complex which promotes both telomere uncapping and telomere elongation (By similarity)                                                               |
| N | Q0C9R3 | CC | The complex is required for efficient recruitment of transcriptional coactivators (By similarity).                                                                              |
| N | Q0C9R3 | DE | Protein cgi121;                                                                                                                                                                 |
| N | Q0CVW0 | CC | Modulates the mitochondrial matrix zinc pool (By similarity).                                                                                                                   |
| N | Q0CVW0 | DE | Mitochondrial zinc maintenance protein 1, mitochondrial;                                                                                                                        |
| N | Q0CY48 | CC | ATP-binding RNA nuclease involved in the biogenesis of 60S ribosomal subunits and is required for the normal formation of 25S and 5.8S rRNAs (By similarity)                    |
| N | Q0CY48 | DE | ATP-dependent RNA helicase dbp9;                                                                                                                                                |
| N | Q0CY48 | DR | ATP-dependent helicase activity                                                                                                                                                 |
| N | Q0CY48 | DR | rRNA processing                                                                                                                                                                 |
| N | Q0G9X7 | CC | Produces ATP from ADP in the presence of a proton gradient across the membrane                                                                                                  |
| N | Q0G9X7 | CC | The alpha chain is a regulatory subunit (By similarity).                                                                                                                        |
| N | Q0G9X7 | DE | ATP synthase F1 sector subunit alpha;                                                                                                                                           |
| N | Q0G9X7 | DE | ATP synthase subunit alpha, chloroplastic;                                                                                                                                      |
| N | Q0G9X7 | DE | F-ATPase subunit alpha;                                                                                                                                                         |
| N | Q0G9X7 | DR | ATP hydrolysis coupled proton transport                                                                                                                                         |
| N | Q0G9X7 | DR | ATP synthesis coupled proton transport                                                                                                                                          |
| N | Q0G9X7 | DR | hydrogen ion transporting ATP synthase activity, rotational mechanism                                                                                                           |
| N | Q0G9X7 | DR | proton-transporting ATPase activity, rotational mechanism                                                                                                                       |
| N | Q0G9X9 | CC | This protein is a component of the reaction center of photosystem II.                                                                                                           |
| N | Q0G9X9 | DE | Photosystem II reaction center protein K;                                                                                                                                       |
| N | Q0G9X9 | DR | photosynthesis                                                                                                                                                                  |

|   |        |    |                                                                                                                                                                           |
|---|--------|----|---------------------------------------------------------------------------------------------------------------------------------------------------------------------------|
| N | Q0H8Z0 | DE | Ribosomal protein S3, mitochondrial;                                                                                                                                      |
| N | Q0H8Z0 | DR | structural constituent of ribosome                                                                                                                                        |
| N | Q0HG53 | DE | Glutamate-1-semialdehyde 2,1-aminomutase;                                                                                                                                 |
| N | Q0HG53 | DE | Glutamate-1-semialdehyde aminotransferase;                                                                                                                                |
| N | Q0HG53 | DR | glutamate-1-semialdehyde 2,1-aminomutase activity                                                                                                                         |
| N | Q0HG53 | DR | porphyrin biosynthetic process                                                                                                                                            |
| N | Q0HG53 | DR | pyridoxal phosphate binding                                                                                                                                               |
| N | Q0HG53 | DR | transaminase activity                                                                                                                                                     |
| N | Q0HJ42 | CC | Activates KDO (a required 8-carbon sugar) for incorporation into bacterial lipopolysaccharide in Gram-negative bacteria (By similarity).                                  |
| N | Q0HJ42 | DE | 3-deoxy-manno-octulosonate cytidyltransferase;                                                                                                                            |
| N | Q0HJ42 | DE | CMP-2-keto-3-deoxyoctulosonic acid synthase;                                                                                                                              |
| N | Q0HJ42 | DE | CMP-KDO synthase;                                                                                                                                                         |
| N | Q0HJ42 | DR | 3-deoxy-manno-octulosonate cytidyltransferase activity                                                                                                                    |
| N | Q0HJ42 | DR | lipopolysaccharide biosynthetic process                                                                                                                                   |
| N | Q0HPG0 | CC | Produces ATP from ADP in the presence of a proton gradient across the membrane.                                                                                           |
| N | Q0HPG0 | CC | The gamma chain is believed to be important in regulating ATPase activity and the flow of protons through the CF(0) complex (By similarity).                              |
| N | Q0HPG0 | DE | ATP synthase F1 sector gamma subunit;                                                                                                                                     |
| N | Q0HPG0 | DE | ATP synthase gamma chain;                                                                                                                                                 |
| N | Q0HPG0 | DE | F-ATPase gamma subunit;                                                                                                                                                   |
| N | Q0HPG0 | DR | ATP synthesis coupled proton transport                                                                                                                                    |
| N | Q0HPG0 | DR | hydrogen ion transporting ATP synthase activity, rotational mechanism                                                                                                     |
| N | Q0HPG0 | DR | proton-transporting ATPase activity, rotational mechanism                                                                                                                 |
| N | Q0HQI7 | CC | Tetrapolymerization of the monopyrrole PBG into the hydroxymethylbilane pre-uroporphyrinogen in several discrete steps.                                                   |
| N | Q0HQI7 | DE | Hydroxymethylbilane synthase;                                                                                                                                             |
| N | Q0HQI7 | DE | Porphobilinogen deaminase;                                                                                                                                                |
| N | Q0HQI7 | DE | Pre-uroporphyrinogen synthase;                                                                                                                                            |
| N | Q0HQI7 | DR | hydroxymethylbilane synthase activity                                                                                                                                     |
| N | Q0HQI7 | DR | peptidyl-pyrromethane cofactor linkage                                                                                                                                    |
| N | Q0HQI7 | DR | porphyrin biosynthetic process                                                                                                                                            |
| N | Q0HS05 | DE | Protein ApaG;                                                                                                                                                             |
| N | Q0HVA7 | CC | Required for the thiolation of cytidine in position 32 of tRNA, to form 2-thiocytidine (s(2)C32) (By similarity).                                                         |
| N | Q0HVA7 | DE | tRNA 2-thiocytidine biosynthesis protein TtcA;                                                                                                                            |
| N | Q0HVA7 | DR | tRNA processing                                                                                                                                                           |
| N | Q0HXU4 | DE | Leucine--tRNA ligase;                                                                                                                                                     |
| N | Q0HXU4 | DE | Leucyl-tRNA synthetase;                                                                                                                                                   |
| N | Q0HXU4 | DR | leucine-tRNA ligase activity                                                                                                                                              |
| N | Q0HXU4 | DR | leucyl-tRNA aminoacylation                                                                                                                                                |
| N | Q0HYV7 | DE | PKHD-type hydroxylase Shewmr7_0698;                                                                                                                                       |
| N | Q0HYV7 | DR | L-ascorbic acid binding                                                                                                                                                   |
| N | Q0HYV7 | DR | iron ion binding                                                                                                                                                          |
| N | Q0HYV7 | DR | oxidation-reduction process                                                                                                                                               |
| N | Q0HYV7 | DR | oxidoreductase activity, acting on paired donors, with incorporation or reduction of molecular oxygen                                                                     |
| N | Q0HYV7 | DR | oxidoreductase activity, acting on single donors with incorporation of molecular oxygen, incorporation of two atoms of oxygen                                             |
| N | Q0I1Z1 | CC | Catalyzes the reversible conversion of 2-phosphoglycerate into phosphoenolpyruvate.                                                                                       |
| N | Q0I1Z1 | CC | It is essential for the degradation of carbohydrates via glycolysis (By similarity).                                                                                      |
| N | Q0I1Z1 | DE | 2-phospho-D-glycerate hydro-lyase;                                                                                                                                        |
| N | Q0I1Z1 | DE | 2-phosphoglycerate dehydratase;                                                                                                                                           |
| N | Q0I1Z1 | DR | magnesium ion binding                                                                                                                                                     |
| N | Q0I1Z1 | DR | phosphopyruvate hydratase activity                                                                                                                                        |
| N | Q0I5V1 | DE | D-serine deaminase;                                                                                                                                                       |
| N | Q0I5V1 | DE | Probable D-serine dehydratase;                                                                                                                                            |
| N | Q0I5V1 | DR | D-amino acid metabolic process                                                                                                                                            |
| N | Q0I5V1 | DR | D-serine ammonia-lyase activity                                                                                                                                           |
| N | Q0I5V1 | DR | pyridoxal phosphate binding                                                                                                                                               |
| N | Q0I891 | CC | Converts heme B (protoneme 1A) to heme O by substitution of the vinyl group on carbon 2 of heme B porphyrin ring with a hydroxyethyl farnesyl side group (By similarity). |
| N | Q0I891 | DE | Heme B farnesyltransferase;                                                                                                                                               |
| N | Q0I891 | DE | Heme O synthase;                                                                                                                                                          |
| N | Q0I891 | DE | Protoheme IX farnesyltransferase;                                                                                                                                         |

|   |        |    |                                                                                                                                                                                                   |
|---|--------|----|---------------------------------------------------------------------------------------------------------------------------------------------------------------------------------------------------|
| N | Q0I891 | DR | heme O biosynthetic process                                                                                                                                                                       |
| N | Q0I891 | DR | protoheme IX farnesyltransferase activity                                                                                                                                                         |
| N | Q0ICR3 | CC | Seems to play a role in the dimerization of PSII (By similarity).                                                                                                                                 |
| N | Q0ICR3 | DE | Photosystem II reaction center protein T;                                                                                                                                                         |
| N | Q0ICR3 | DR | photosynthesis                                                                                                                                                                                    |
| N | Q0ID56 | CC | With S4 and S5 plays an important role in translational accuracy (By similarity).                                                                                                                 |
| N | Q0ID56 | DE | 30S ribosomal protein S12;                                                                                                                                                                        |
| N | Q0ID56 | DR | structural constituent of ribosome                                                                                                                                                                |
| N | Q0IIH8 | CC | May have pro-apoptotic function (By similarity).                                                                                                                                                  |
| N | Q0IIH8 | DE | Protein CARP;                                                                                                                                                                                     |
| N | Q0IIH8 | DE | Protein FAM188A;                                                                                                                                                                                  |
| N | Q0IIH8 | DR | calcium ion binding                                                                                                                                                                               |
| N | Q0INY7 | CC | RuBisCO catalyzes two reactions: the carboxylation of D- ribulose 1,5-bisphosphate, the primary event in carbon dioxide fixation, as well as the oxidative fragmentation of the pentose substrate |
| N | Q0INY7 | CC | Both reactions occur simultaneously and in competition at the same active site (By similarity).                                                                                                   |
| N | Q0INY7 | DE | Ribulose bisphosphate carboxylase small chain C;                                                                                                                                                  |
| N | Q0INY7 | DE | Ribulose bisphosphate carboxylase small chain, chloroplastic;                                                                                                                                     |
| N | Q0INY7 | DE | RuBisCO small subunit C;                                                                                                                                                                          |
| N | Q0INY7 | DE | RuBisCO small subunit;                                                                                                                                                                            |
| N | Q0INY7 | DR | monooxygenase activity                                                                                                                                                                            |
| N | Q0INY7 | DR | oxidation-reduction process                                                                                                                                                                       |
| N | Q0INY7 | DR | photorespiration                                                                                                                                                                                  |
| N | Q0INY7 | DR | reductive pentose-phosphate cycle                                                                                                                                                                 |
| N | Q0INY7 | DR | ribulose-bisphosphate carboxylase activity                                                                                                                                                        |
| N | Q0ITW7 | DE | Alcohol dehydrogenase 2;                                                                                                                                                                          |
| N | Q0ITW7 | DR | alcohol dehydrogenase (NAD) activity                                                                                                                                                              |
| N | Q0ITW7 | DR | oxidation-reduction process                                                                                                                                                                       |
| N | Q0ITW7 | DR | zinc ion binding                                                                                                                                                                                  |
| N | Q0J0N4 | DE | Beta-glucosidase 30;                                                                                                                                                                              |
| N | Q0J0N4 | DR | beta-glucosidase activity                                                                                                                                                                         |
| N | Q0J0N4 | DR | carbohydrate metabolic process                                                                                                                                                                    |
| N | Q0J0N4 | DR | cation binding                                                                                                                                                                                    |
| N | Q0J361 | CC | Mediates both low-affinity uptake and efflux of sugar across the plasma membrane (By similarity).                                                                                                 |
| N | Q0J361 | DE | Bidirectional sugar transporter SWEET7a;                                                                                                                                                          |
| N | Q0J361 | DR | sugar transmembrane transporter activity                                                                                                                                                          |
| N | Q0KA17 | CC | Associates with the EF-Tu.GDP complex and induces the exchange of GDP to GTP                                                                                                                      |
| N | Q0KA17 | CC | It remains bound to the aminoacyl-tRNA.EF- Tu.GTP complex up to the GTP hydrolysis stage on the ribosome.                                                                                         |
| N | Q0KA17 | DE | Elongation factor Ts;                                                                                                                                                                             |
| N | Q0KA17 | DR | translation elongation factor activity                                                                                                                                                            |
| N | Q0MQH3 | CC | Accessory subunit of the mitochondrial membrane respiratory chain NADH dehydrogenase (Complex I), that is believed not to be involved in catalysis                                                |
| N | Q0MQH3 | CC | Complex I functions in the transfer of electrons from NADH to the respiratory chain                                                                                                               |
| N | Q0MQH3 | CC | The immediate electron acceptor for the enzyme is believed to be ubiquinone (By similarity).                                                                                                      |
| N | Q0MQH3 | DE | Complex I-15 kDa;                                                                                                                                                                                 |
| N | Q0MQH3 | DE | NADH dehydrogenase [ubiquinone] iron-sulfur protein 5;                                                                                                                                            |
| N | Q0MQH3 | DE | NADH-ubiquinone oxidoreductase 15 kDa subunit;                                                                                                                                                    |
| N | Q0MQH3 | DR | electron transport chain                                                                                                                                                                          |
| N | Q0MQH3 | DR | mitochondrial respiratory chain complex I assembly                                                                                                                                                |
| N | Q0Q472 | CC | Component of the viral envelope that plays a central role in virus morphogenesis and assembly via its interactions with other viral proteins (By similarity).                                     |
| N | Q0Q472 | DE | E1 glycoprotein;                                                                                                                                                                                  |
| N | Q0Q472 | DE | Matrix glycoprotein;                                                                                                                                                                              |
| N | Q0Q472 | DE | Membrane glycoprotein;                                                                                                                                                                            |
| N | Q0Q472 | DE | Membrane protein;                                                                                                                                                                                 |
| N | Q0Q472 | DR | evasion by virus of host immune response                                                                                                                                                          |
| N | Q0Q472 | DR | viral infectious cycle                                                                                                                                                                            |
| N | Q0RBC4 | CC | Acts as a chaperone (By similarity).                                                                                                                                                              |
| N | Q0RBC4 | DE | Chaperone protein DnaK;                                                                                                                                                                           |
| N | Q0RBC4 | DE | Heat shock 70 kDa protein;                                                                                                                                                                        |
| N | Q0RBC4 | DE | Heat shock protein 70;                                                                                                                                                                            |

|   |        |    |                                                                                                                                                                                                       |
|---|--------|----|-------------------------------------------------------------------------------------------------------------------------------------------------------------------------------------------------------|
| N | Q0RBC4 | DR | protein folding                                                                                                                                                                                       |
| N | Q0RBC4 | DR | response to stress                                                                                                                                                                                    |
| N | Q0RBC4 | DR | unfolded protein binding                                                                                                                                                                              |
| N | Q0RF89 | CC | provides the free amino group of the aminoacyl moiety of methionyl-tRNA (Met-tRNA)                                                                                                                    |
| N | Q0RF89 | CC | The formyl group appears to play a dual role in the initiator identity of N-formylmethionyl-tRNA by: (I) promoting its recognition by IF2 and (II) impairing its binding to EFTu-GTP (By similarity). |
| N | Q0RF89 | DE | Methionyl-tRNA formyltransferase;                                                                                                                                                                     |
| N | Q0RF89 | DR | methionyl-tRNA formyltransferase activity                                                                                                                                                             |
| N | Q0RF89 | DR | methyltransferase activity                                                                                                                                                                            |
| N | Q0RJJ1 | CC | Catalyzes the dephosphorylation of undecaprenyl diphosphate (UPP)                                                                                                                                     |
| N | Q0RJJ1 | CC | Confers resistance to bacitracin (By similarity).                                                                                                                                                     |
| N | Q0RJJ1 | DE | Bacitracin resistance protein 2;                                                                                                                                                                      |
| N | Q0RJJ1 | DE | Undecaprenyl pyrophosphate phosphatase 2;                                                                                                                                                             |
| N | Q0RJJ1 | DE | Undecaprenyl-diphosphatase 2;                                                                                                                                                                         |
| N | Q0RJJ1 | DR | cellular cell wall organization                                                                                                                                                                       |
| N | Q0RJJ1 | DR | dephosphorylation                                                                                                                                                                                     |
| N | Q0RJJ1 | DR | peptidoglycan biosynthetic process                                                                                                                                                                    |
| N | Q0RJJ1 | DR | regulation of cell shape                                                                                                                                                                              |
| N | Q0RJJ1 | DR | response to antibiotic                                                                                                                                                                                |
| N | Q0RJJ1 | DR | undecaprenyl-diphosphatase activity                                                                                                                                                                   |
| N | Q0S275 | CC | Catalyzes the NADP-dependent rearrangement and reduction of 1-deoxy-D-xylulose-5-phosphate (DXP) to 2-C-methyl-D-erythritol 4-phosphate (MEP) (By similarity)                                         |
| N | Q0S275 | DE | 1-deoxy-D-xylulose 5-phosphate reductoisomerase;                                                                                                                                                      |
| N | Q0S275 | DE | 1-deoxyxylulose-5-phosphate reductoisomerase;                                                                                                                                                         |
| N | Q0S275 | DE | 2-C-methyl-D-erythritol 4-phosphate synthase;                                                                                                                                                         |
| N | Q0S275 | DE | DXP reductoisomerase;                                                                                                                                                                                 |
| N | Q0S275 | DR | 1-deoxy-D-xylulose-5-phosphate reductoisomerase activity                                                                                                                                              |
| N | Q0S275 | DR | isoprenoid biosynthetic process                                                                                                                                                                       |
| N | Q0S275 | DR | metal ion binding                                                                                                                                                                                     |
| N | Q0S275 | DR | oxidation-reduction process                                                                                                                                                                           |
| N | Q0S2D6 | DE | Acylphosphatase;                                                                                                                                                                                      |
| N | Q0S2D6 | DE | Acylphosphate phosphohydrolase;                                                                                                                                                                       |
| N | Q0S2D6 | DR | acylphosphatase activity                                                                                                                                                                              |
| N | Q0S3E6 | DE | 50S ribosomal protein L17;                                                                                                                                                                            |
| N | Q0S3E6 | DR | structural constituent of ribosome                                                                                                                                                                    |
| N | Q0SI81 | DE | CMP kinase;                                                                                                                                                                                           |
| N | Q0SI81 | DE | Cytidine monophosphate kinase;                                                                                                                                                                        |
| N | Q0SI81 | DE | Cytidylate kinase;                                                                                                                                                                                    |
| N | Q0SI81 | DR | cytidylate kinase activity                                                                                                                                                                            |
| N | Q0SQE8 | CC | Protein S19 forms a complex with S13 that binds strongly to the 16S ribosomal RNA (By similarity).                                                                                                    |
| N | Q0SQE8 | DE | 30S ribosomal protein S19;                                                                                                                                                                            |
| N | Q0SQE8 | DR | structural constituent of ribosome                                                                                                                                                                    |
| N | Q0SRD5 | CC | Initiates the rapid degradation of small, acid-soluble proteins during spore germination (By similarity).                                                                                             |
| N | Q0SRD5 | DE | GPR endopeptidase;                                                                                                                                                                                    |
| N | Q0SRD5 | DE | Germination protease;                                                                                                                                                                                 |
| N | Q0SRD5 | DE | Germination proteinase;                                                                                                                                                                               |
| N | Q0SRD5 | DE | Spore protease;                                                                                                                                                                                       |
| N | Q0SRD5 | DR | peptidase activity                                                                                                                                                                                    |
| N | Q0SRD5 | DR | spore germination                                                                                                                                                                                     |
| N | Q0SS42 | CC | Catalyzes the attachment of alanine to tRNA(Ala) in a two-step reaction: alanine is first activated by ATP to form Ala- AMP and then transferred to the acceptor end of tRNA(Ala)                     |
| N | Q0SS42 | CC | Also edits incorrectly charged Ser-tRNA(Ala) and Gly-tRNA(Ala) via its editing domain (By similarity).                                                                                                |
| N | Q0SS42 | DE | Alanine--tRNA ligase;                                                                                                                                                                                 |
| N | Q0SS42 | DE | Alanyl-tRNA synthetase;                                                                                                                                                                               |
| N | Q0SS42 | DR | alanine-tRNA ligase activity                                                                                                                                                                          |
| N | Q0SS42 | DR | alanyl-tRNA aminoacylation                                                                                                                                                                            |
| N | Q0SS42 | DR | metal ion binding                                                                                                                                                                                     |
| N | Q0SXB9 | DE | Phosphatidylserine decarboxylase alpha chain;                                                                                                                                                         |
| N | Q0SXB9 | DE | Phosphatidylserine decarboxylase beta chain;                                                                                                                                                          |
| N | Q0SXB9 | DE | Phosphatidylserine decarboxylase proenzyme;                                                                                                                                                           |

|   |        |    |                                                                                                                                                                                   |
|---|--------|----|-----------------------------------------------------------------------------------------------------------------------------------------------------------------------------------|
| N | Q0SXB9 | DR | phosphatidylserine decarboxylase activity                                                                                                                                         |
| N | Q0SXB9 | DR | phospholipid biosynthetic process                                                                                                                                                 |
| N | Q0SXC1 | DE | Uncharacterized protein YjeA;                                                                                                                                                     |
| N | Q0SXC1 | DR | lysine-tRNA ligase activity                                                                                                                                                       |
| N | Q0SXC1 | DR | lysyl-tRNA aminoacylation                                                                                                                                                         |
| N | Q0T0S8 | CC | Catalyzes the formation of N(7)-methylguanine at position 46 (m7G46) in tRNA (By similarity).                                                                                     |
| N | Q0T0S8 | DE | tRNA (guanine-N(7)-)-methyltransferase;                                                                                                                                           |
| N | Q0T0S8 | DE | tRNA(m7G46)-methyltransferase;                                                                                                                                                    |
| N | Q0T0S8 | DR | tRNA (guanine-N7-)-methyltransferase activity                                                                                                                                     |
| N | Q0T0U3 | CC | Could be a nuclease that resolves Holliday junction intermediates in genetic recombination.                                                                                       |
| N | Q0T0U3 | DE | Putative Holliday junction resolvase;                                                                                                                                             |
| N | Q0T0U3 | DR | DNA recombination                                                                                                                                                                 |
| N | Q0T0U3 | DR | nuclease activity                                                                                                                                                                 |
| N | Q0T0U3 | DR | nucleic acid binding                                                                                                                                                              |
| N | Q0T3U0 | DE | Aspartate--tRNA ligase;                                                                                                                                                           |
| N | Q0T3U0 | DE | Aspartyl-tRNA synthetase;                                                                                                                                                         |
| N | Q0T3U0 | DR | aspartate-tRNA ligase activity                                                                                                                                                    |
| N | Q0T3U0 | DR | aspartyl-tRNA aminoacylation                                                                                                                                                      |
| N | Q0T3U0 | DR | nucleic acid binding                                                                                                                                                              |
| N | Q0T4Y5 | DE | Peptide methionine sulfoxide reductase MsrB;                                                                                                                                      |
| N | Q0T4Y5 | DE | Peptide-methionine (R)-S-oxide reductase;                                                                                                                                         |
| N | Q0T4Y5 | DR | metal ion binding                                                                                                                                                                 |
| N | Q0T4Y5 | DR | oxidation-reduction process                                                                                                                                                       |
| N | Q0T4Y5 | DR | peptide-methionine (R)-S-oxide reductase activity                                                                                                                                 |
| N | Q0T4Y5 | DR | peptide-methionine-(S)-S-oxide reductase activity                                                                                                                                 |
| N | Q0T7D7 | CC | Catalyzes the hydrolysis of 4-amino-2-methyl-5- hydroxymethylpyrimidine pyrophosphate (HMP-PP) to 4-amino-2- methyl-5-hydroxymethylpyrimidine phosphate (HMP-P) (By similarity).  |
| N | Q0T7D7 | DE | HMP-PP phosphatase;                                                                                                                                                               |
| N | Q0T7D7 | DR | hydrolase activity                                                                                                                                                                |
| N | Q0TCW1 | DE | UPF0102 protein yraN;                                                                                                                                                             |
| N | Q0TCW1 | DR | nuclease activity                                                                                                                                                                 |
| N | Q0TEI3 | CC | Catalyzes the attachment of alanine to tRNA(Ala) in a two-step reaction: alanine is first activated by ATP to form Ala- AMP and then transferred to the acceptor end of tRNA(Ala) |
| N | Q0TEI3 | CC | Also edits incorrectly charged Ser-tRNA(Ala) and Gly-tRNA(Ala) via its editing domain (By similarity).                                                                            |
| N | Q0TEI3 | DE | Alanine--tRNA ligase;                                                                                                                                                             |
| N | Q0TEI3 | DE | Alanyl-tRNA synthetase;                                                                                                                                                           |
| N | Q0TEI3 | DR | alanine-tRNA ligase activity                                                                                                                                                      |
| N | Q0TEI3 | DR | alanyl-tRNA aminoacylation                                                                                                                                                        |
| N | Q0TEI3 | DR | metal ion binding                                                                                                                                                                 |
| N | Q0TF48 | CC | Phosphorylates B6 vitamers; functions in a salvage pathway                                                                                                                        |
| N | Q0TF48 | CC | Uses pyridoxal, pyridoxine, and pyridoxamine as substrates (By similarity).                                                                                                       |
| N | Q0TF48 | DE | PN/PL/PM kinase;                                                                                                                                                                  |
| N | Q0TF48 | DE | Pyridoxal kinase;                                                                                                                                                                 |
| N | Q0TF48 | DE | Pyridoxamine kinase;                                                                                                                                                              |
| N | Q0TF48 | DE | Pyridoxine kinase;                                                                                                                                                                |
| N | Q0TF48 | DE | Vitamin B6 kinase;                                                                                                                                                                |
| N | Q0TF48 | DR | metal ion binding                                                                                                                                                                 |
| N | Q0TF48 | DR | pyridoxal kinase activity                                                                                                                                                         |
| N | Q0TF48 | DR | pyridoxine biosynthetic process                                                                                                                                                   |
| N | Q0TIF9 | CC | Peptide chain release factor 1 directs the termination of translation in response to the peptide chain termination codons UAG and UAA (By similarity).                            |
| N | Q0TIF9 | DE | Peptide chain release factor 1;                                                                                                                                                   |
| N | Q0TIF9 | DR | translation release factor activity, codon specific                                                                                                                               |
| N | Q0TIY4 | CC | Catalyzes the reversible formation of acyl-phosphate (acyl-PO(4)) from acyl-[acyl-carrier-protein] (acyl-ACP)                                                                     |
| N | Q0TIY4 | CC | This enzyme utilizes acyl-ACP as fatty acyl donor, but not acyl-CoA (By similarity).                                                                                              |
| N | Q0TIY4 | DE | Acyl-ACP phosphotransacylase;                                                                                                                                                     |
| N | Q0TIY4 | DE | Acyl-[acyl-carrier-protein]-phosphate acyltransferase;                                                                                                                            |
| N | Q0TIY4 | DE | Phosphate acyltransferase;                                                                                                                                                        |
| N | Q0TIY4 | DE | Phosphate-acyl-ACP acyltransferase;                                                                                                                                               |

|   |        |    |                                                                                                                                                                      |
|---|--------|----|----------------------------------------------------------------------------------------------------------------------------------------------------------------------|
| N | Q0TIY4 | DR | fatty acid biosynthetic process                                                                                                                                      |
| N | Q0TIY4 | DR | phospholipid biosynthetic process                                                                                                                                    |
| N | Q0TIY4 | DR | transferase activity, transferring acyl groups other than amino-acyl groups                                                                                          |
| N | Q0TK32 | CC | Together with lptD, is involved in the assembly of LPS in the outer leaflet of the outer membrane (By similarity).                                                   |
| N | Q0TK32 | DE | LPS-assembly lipoprotein lptE;                                                                                                                                       |
| N | Q0TK32 | DR | Gram-negative-bacterium-type cell outer membrane assembly                                                                                                            |
| N | Q0TL85 | CC | Proof-reading, error-prone DNA polymerase involved in untargeted mutagenesis                                                                                         |
| N | Q0TL85 | CC | Copies undamaged DNA at stalled replication forks, which arise in vivo from mismatched or misaligned primer ends                                                     |
| N | Q0TL85 | CC | Exhibits no 3'-5' exonuclease (proofreading) activity                                                                                                                |
| N | Q0TL85 | CC | May be involved in translesional synthesis, in conjunction with the beta clamp from polIII (By similarity).                                                          |
| N | Q0TL85 | CC | These misaligned primers can be extended by polIV                                                                                                                    |
| N | Q0TL85 | DE | DNA polymerase IV;                                                                                                                                                   |
| N | Q0TL85 | DR | DNA replication                                                                                                                                                      |
| N | Q0TL85 | DR | DNA-directed DNA polymerase activity                                                                                                                                 |
| N | Q0TL85 | DR | damaged DNA binding                                                                                                                                                  |
| N | Q0TL85 | DR | metal ion binding                                                                                                                                                    |
| N | Q0TLC3 | CC | Endonuclease that specifically degrades the RNA of RNA- DNA hybrids (By similarity).                                                                                 |
| N | Q0TLC3 | DE | Ribonuclease H;                                                                                                                                                      |
| N | Q0TLC3 | DR | metal ion binding                                                                                                                                                    |
| N | Q0TLC3 | DR | nucleic acid binding                                                                                                                                                 |
| N | Q0TLC3 | DR | ribonuclease H activity                                                                                                                                              |
| N | Q0TP38 | CC | Modulates recA activity (By similarity).                                                                                                                             |
| N | Q0TP38 | DE | Regulatory protein recX;                                                                                                                                             |
| N | Q0TP38 | DR | regulation of DNA repair                                                                                                                                             |
| N | Q0TPT1 | CC | Catalyzes the hydrolysis of both 2',3'-cyclic AMP and 2',3'-cyclic GMP into 3'-AMP and 3'-GMP, respectively, at the 3'- terminal of RNA (By similarity).             |
| N | Q0TPT1 | DE | 2',3'-cyclic-nucleotide 2'-phosphodiesterase;                                                                                                                        |
| N | Q0TPT1 | DR | 2',3'-cyclic-nucleotide 2'-phosphodiesterase activity                                                                                                                |
| N | Q0TQZ6 | CC | Binds specifically to the ssrA RNA (tmRNA) and is required for stable association of ssrA with ribosomes (By similarity).                                            |
| N | Q0TQZ6 | DE | SsrA-binding protein;                                                                                                                                                |
| N | Q0TR61 | CC | may catalyze the methylation of C-1 in cobalt-precorrin-5 and the subsequent extrusion of acetic acid from the resulting intermediate to form cobalt-precorrin-6A    |
| N | Q0TR61 | DE | Putative cobalt-precorrin-6A synthase [deacetylating];                                                                                                               |
| N | Q0TR61 | DR | cobalamin biosynthetic process                                                                                                                                       |
| N | Q0TR61 | DR | transferase activity                                                                                                                                                 |
| N | Q0TT99 | DE | 3-phosphoshikimate 1-carboxyvinyltransferase;                                                                                                                        |
| N | Q0TT99 | DE | 5-enolpyruvylshikimate-3-phosphate synthase;                                                                                                                         |
| N | Q0TT99 | DE | EPSP synthase;                                                                                                                                                       |
| N | Q0TT99 | DR | 3-phosphoshikimate 1-carboxyvinyltransferase activity                                                                                                                |
| N | Q0TT99 | DR | aromatic amino acid family biosynthetic process                                                                                                                      |
| N | Q0TUD0 | CC | The UvrABC repair system catalyzes the recognition and processing of DNA lesions                                                                                     |
| N | Q0TUD0 | CC | A damage recognition complex composed of 2 uvrA and 2 uvrB subunits scans DNA for abnormalities                                                                      |
| N | Q0TUD0 | CC | DNA wrap is dependent on ATR binding by uvrB and probably causes local melting of the DNA helix, facilitating insertion of uvrB beta-hairpin between the DNA strands |
| N | Q0TUD0 | CC | If a lesion is found the uvrA subunits dissociate and the uvrB-DNA preincision complex is formed                                                                     |
| N | Q0TUD0 | CC | If no lesion is found, the DNA wraps around the other uvrB subunit that will check the other stand for damage (By similarity).                                       |
| N | Q0TUD0 | CC | Then uvrB probes one DNA strand for the presence of a lesion                                                                                                         |
| N | Q0TUD0 | CC | This complex is subsequently bound by uvrC and the second uvrB is released                                                                                           |
| N | Q0TUD0 | CC | Upon binding of the uvrA(2)B(2) complex to a putative damaged site, the DNA wraps around one uvrB monomer                                                            |
| N | Q0TUD0 | DE | Excinuclease ABC subunit B;                                                                                                                                          |
| N | Q0TUD0 | DE | Protein uvrB;                                                                                                                                                        |
| N | Q0TUD0 | DE | UvrABC system protein B;                                                                                                                                             |
| N | Q0TUD0 | DR | excinuclease ABC activity                                                                                                                                            |
| N | Q0TUD0 | DR | helicase activity                                                                                                                                                    |
| N | Q0TUD0 | DR | nucleotide-excision repair                                                                                                                                           |

|   |        |    |                                                                                                                                                                                         |
|---|--------|----|-----------------------------------------------------------------------------------------------------------------------------------------------------------------------------------------|
| N | Q0UUN6 | CC | Catalyzes the dehydration of methylthioribulose-1- phosphate (MTRu-1-P) into 2,3-diketo-5-methylthiopentyl-1- phosphate (DK-MTP-1-P) (By similarity).                                   |
| N | Q0UUN6 | DE | MTRu-1-P dehydratase;                                                                                                                                                                   |
| N | Q0UUN6 | DE | Methylthioribulose-1-phosphate dehydratase;                                                                                                                                             |
| N | Q0UUN6 | DR | L-methionine salvage                                                                                                                                                                    |
| N | Q0UUN6 | DR | metal ion binding                                                                                                                                                                       |
| N | Q0UUN6 | DR | methylthioribulose 1-phosphate dehydratase activity                                                                                                                                     |
| N | Q0V8N6 | CC | The ubiquitous expression and the conservation of the sequence in distant animal species suggest that the gene codes for a protein with housekeeping functions (By similarity).         |
| N | Q0V8N6 | DE | Solute carrier family 10 member 3;                                                                                                                                                      |
| N | Q0V8N6 | DR | bile acid:sodium symporter activity                                                                                                                                                     |
| N | Q0V8N6 | DR | organic anion transport                                                                                                                                                                 |
| N | Q0V9P1 | CC | Inactivates histamine by N-methylation                                                                                                                                                  |
| N | Q0V9P1 | CC | Plays an important role in degrading histamine and in regulating the airway response to histamine (By similarity).                                                                      |
| N | Q0V9P1 | DE | Histamine N-methyltransferase;                                                                                                                                                          |
| N | Q0V9P1 | DR | histamine N-methyltransferase activity                                                                                                                                                  |
| N | Q0VC58 | CC | Monovalent cation channel required for maintenance of rapid intracellular calcium release                                                                                               |
| N | Q0VC58 | CC | May act as a potassium counter-ion channel that functions in synchronization with calcium release from intracellular stores (By similarity).                                            |
| N | Q0VC58 | DE | Transmembrane protein 38B;                                                                                                                                                              |
| N | Q0VC58 | DE | Trimeric intracellular cation channel type B;                                                                                                                                           |
| N | Q0VC58 | DR | potassium channel activity                                                                                                                                                              |
| N | Q0VCL3 | CC | E2-like enzyme involved in autophagy and mitochondrial homeostasis                                                                                                                      |
| N | Q0VCL3 | CC | ATG7 (E1-like enzyme) facilitates this reaction by forming an E1- E2 complex with ATG3 (By similarity).                                                                                 |
| N | Q0VCL3 | CC | Also acts as an autocatalytic E2-like enzyme, catalyzing the conjugation of ATG12 to itself, ATG12 conjugation to ATG3 playing a role in mitochondrial homeostasis but not in autophagy |
| N | Q0VCL3 | CC | Catalyzes the conjugation of ATG8-like proteins (GABARAP, GABARAPL1, GABARAPL2 or MAP1LC3A) to phosphatidylethanolamine (PE)                                                            |
| N | Q0VCL3 | CC | PE-conjugation to ATG8-like proteins is essential for autophagy                                                                                                                         |
| N | Q0VCL3 | CC | Preferred substrate is MAP1LC3A                                                                                                                                                         |
| N | Q0VCL3 | DE | Autophagy-related protein 3;                                                                                                                                                            |
| N | Q0VCL3 | DE | Ubiquitin-like-conjugating enzyme ATG3;                                                                                                                                                 |
| N | Q0VCL3 | DR | Atg12 ligase activity                                                                                                                                                                   |
| N | Q0VCL3 | DR | Atg8 ligase activity                                                                                                                                                                    |
| N | Q0VCL3 | DR | autophagic vacuole assembly                                                                                                                                                             |
| N | Q0VCL3 | DR | mitochondrial fragmentation involved in apoptosis                                                                                                                                       |
| N | Q0VCL3 | DR | protein transport                                                                                                                                                                       |
| N | Q0VL48 | CC | Necessary for normal cell division and for the maintenance of normal septation (By similarity).                                                                                         |
| N | Q0VL48 | DE | Probable GTP-binding protein EngB;                                                                                                                                                      |
| N | Q0VL48 | DR | barrier septum formation                                                                                                                                                                |
| N | Q0VP77 | DE | AIR synthase;                                                                                                                                                                           |
| N | Q0VP77 | DE | Phosphoribosyl-aminoimidazole synthetase;                                                                                                                                               |
| N | Q0VP77 | DE | Phosphoribosylformylglycinamide cyclo-ligase;                                                                                                                                           |
| N | Q0VP77 | DR | 'de novo' IMP biosynthetic process                                                                                                                                                      |
| N | Q0VP77 | DR | phosphoribosylformylglycinamide cyclo-ligase activity                                                                                                                                   |
| N | Q0VQG9 | DE | UPF0341 protein ABO_1131;                                                                                                                                                               |
| N | Q0VTN6 | DE | UPF0391 membrane protein ABO_0024;                                                                                                                                                      |
| N | Q0WJT1 | CC | Nitric oxide-sensitive repressor of genes involved in protecting the cell against nitrosative stress                                                                                    |
| N | Q0WJT1 | CC | May require iron for activity (By similarity).                                                                                                                                          |
| N | Q0WJT1 | DE | HTH-type transcriptional repressor nsrR;                                                                                                                                                |
| N | Q0WJT1 | DR | 2 iron, 2 sulfur cluster binding                                                                                                                                                        |
| N | Q0WJT1 | DR | metal ion binding                                                                                                                                                                       |
| N | Q0WRJ7 | CC | PPases accelerate the folding of proteins                                                                                                                                               |
| N | Q0WRJ7 | CC | Involved in the accumulation of the PSII complex.                                                                                                                                       |
| N | Q0WRJ7 | CC | It catalyzes the cis-trans isomerization of proline imide peptide bonds in oligopeptides.                                                                                               |
| N | Q0WRJ7 | DE | FKBP-type peptidyl-prolyl cis-trans isomerase 6, chloroplastic;                                                                                                                         |
| N | Q0WRJ7 | DR | oxidoreductase activity                                                                                                                                                                 |
| N | Q0WRJ7 | DR | peptidyl-prolyl cis-trans isomerase activity                                                                                                                                            |
| N | Q0WRJ7 | DR | photosystem II assembly                                                                                                                                                                 |

|   |        |    |                                                                                                                                                                                                                                  |
|---|--------|----|----------------------------------------------------------------------------------------------------------------------------------------------------------------------------------------------------------------------------------|
| N | Q0WRJ7 | DR | protein binding                                                                                                                                                                                                                  |
| N | Q0WRJ7 | DR | protein folding                                                                                                                                                                                                                  |
| N | Q0WVN5 | CC | Thought to be a Golgi-localized beta-glycan synthase that polymerize the backbones of noncellulosic polysaccharides (hemicelluloses) of plant cell wall.                                                                         |
| N | Q0WVN5 | DE | Cellulose synthase-like protein G3;                                                                                                                                                                                              |
| N | Q0WVN5 | DR | cellular cell wall organization                                                                                                                                                                                                  |
| N | Q0WVN5 | DR | cellulose biosynthetic process                                                                                                                                                                                                   |
| N | Q0WVN5 | DR | cellulose synthase (UDP-forming) activity                                                                                                                                                                                        |
| N | Q10222 | CC | Component of the cleavage and polyadenylation factor (CPF) complex, which plays a key role in polyadenylation-dependent pre-mRNA 3'-end formation and cooperates with cleavage factors including the CFIA complex and NAB4/CFIB. |
| N | Q10222 | DE | mRNA cleavage and polyadenylation specificity factor complex subunit pta1;                                                                                                                                                       |
| N | Q10222 | DR | mRNA processing                                                                                                                                                                                                                  |
| N | Q10926 | DE | Uncharacterized protein B0302.2;                                                                                                                                                                                                 |
| N | Q10QL5 | CC | May play a role in responses to biotic and abiotic stresses (By similarity).                                                                                                                                                     |
| N | Q10QL5 | DE | BTH-induced protein phosphatase 2C 1;                                                                                                                                                                                            |
| N | Q10QL5 | DE | Probable protein phosphatase 2C BIPP2C1;                                                                                                                                                                                         |
| N | Q10QL5 | DR | metal ion binding                                                                                                                                                                                                                |
| N | Q10QL5 | DR | phosphoprotein phosphatase activity                                                                                                                                                                                              |
| N | Q10UY0 | CC | The glycine cleavage system catalyzes the degradation of glycine                                                                                                                                                                 |
| N | Q10UY0 | CC | The H protein shuttles the methylamine group of glycine from the P protein to the T protein (By similarity).                                                                                                                     |
| N | Q10UY0 | DE | Glycine cleavage system H protein;                                                                                                                                                                                               |
| N | Q10UY0 | DR | glycine decarboxylation via glycine cleavage system                                                                                                                                                                              |
| N | Q10Y25 | CC | Component of the kaiABC clock protein complex, which constitutes the main circadian regulator in cyanobacteria                                                                                                                   |
| N | Q10Y25 | CC | In the complex, it decreases the phosphorylation status of kaiC                                                                                                                                                                  |
| N | Q10Y25 | CC | It has no effect on kaiC by itself, but instead needs the presence of both kaiA and kaiC, suggesting that it acts by antagonizing the interaction between kaiA and kaiC (By similarity).                                         |
| N | Q10Y25 | CC | The kaiABC complex may act as a promoter-non-specific transcription regulator that represses transcription, possibly by acting on the state of chromosome compaction                                                             |
| N | Q10Y25 | DE | Circadian clock protein kaiB;                                                                                                                                                                                                    |
| N | Q10Y25 | DR | circadian rhythm                                                                                                                                                                                                                 |
| N | Q10YG4 | CC | This protein is involved in the repair of mismatches in DNA                                                                                                                                                                      |
| N | Q10YG4 | CC | It is possible that it carries out the mismatch recognition step                                                                                                                                                                 |
| N | Q10YG4 | CC | This protein has a weak ATPase activity (By similarity).                                                                                                                                                                         |
| N | Q10YG4 | DE | DNA mismatch repair protein mutS;                                                                                                                                                                                                |
| N | Q10YG4 | DR | mismatch repair                                                                                                                                                                                                                  |
| N | Q10YG4 | DR | mismatched DNA binding                                                                                                                                                                                                           |
| N | Q10YS9 | CC | This D-type cytochrome is tightly associated with the reaction center of photosystem II and possibly is part of the water-oxidation complex (By similarity)                                                                      |
| N | Q10YS9 | DE | Cytochrome b559 subunit beta;                                                                                                                                                                                                    |
| N | Q10YS9 | DE | PSII reaction center subunit VI;                                                                                                                                                                                                 |
| N | Q10YS9 | DR | photosynthetic electron transport chain                                                                                                                                                                                          |
| N | Q11097 | DE | Uncharacterized protein C02B8.7;                                                                                                                                                                                                 |
| N | Q11113 | DE | Uncharacterized protein C03B1.6;                                                                                                                                                                                                 |
| N | Q116J4 | DE | UPF0367 protein Tery_1229;                                                                                                                                                                                                       |
| N | Q118J2 | CC | Zinc phosphodiesterase, which displays some tRNA 5'-processing endonuclease activity.                                                                                                                                            |
| N | Q118J2 | CC | Probably involved in tRNA maturation, by removing a 3'-trailer from precursor tRNA (By similarity).                                                                                                                              |
| N | Q118J2 | DE | Ribonuclease Z;                                                                                                                                                                                                                  |
| N | Q118J2 | DE | tRNA 3' endonuclease;                                                                                                                                                                                                            |
| N | Q118J2 | DR | endoribonuclease activity, producing 5'-phosphomonoesters                                                                                                                                                                        |
| N | Q118J2 | DR | metal ion binding                                                                                                                                                                                                                |
| N | Q118J2 | DR | tRNA 3'-trailer cleavage                                                                                                                                                                                                         |
| N | Q11CB5 | CC | Catalyzes the interconversion of 2-phosphoglycerate and 3-phosphoglycerate (By similarity).                                                                                                                                      |
| N | Q11CB5 | DE | 2,3-bisphosphoglycerate-dependent phosphoglycerate mutase;                                                                                                                                                                       |
| N | Q11CB5 | DE | BPG-dependent PGAM;                                                                                                                                                                                                              |
| N | Q11CB5 | DE | Phosphoglyceromutase;                                                                                                                                                                                                            |
| N | Q11CB5 | DR | phosphoglycerate mutase activity                                                                                                                                                                                                 |
| N | Q11CL2 | CC | Protease subunit of a proteasome-like degradation complex believed to be a general protein degrading machinery (By similarity).                                                                                                  |
| N | Q11CL2 | DE | ATP-dependent protease subunit HslV;                                                                                                                                                                                             |



|   |        |    |                                                                                                                                                                                                                                                                       |
|---|--------|----|-----------------------------------------------------------------------------------------------------------------------------------------------------------------------------------------------------------------------------------------------------------------------|
| N | Q11CL2 | DR | metal ion binding                                                                                                                                                                                                                                                     |
| N | Q11CL2 | DR | proteolysis involved in cellular protein catabolic process                                                                                                                                                                                                            |
| N | Q11CL2 | DR | threonine-type endopeptidase activity                                                                                                                                                                                                                                 |
| N | Q11HC6 | CC | Required for correct localization of precursor proteins bearing signal peptides with the twin arginine conserved motif S/T-R-R-X-F-L-K                                                                                                                                |
| N | Q11HC6 | CC | This sec-independent pathway is termed TAT for twin-arginine translocation system                                                                                                                                                                                     |
| N | Q11HC6 | CC | This system mainly transports proteins with bound cofactors that require folding prior to export (By similarity).                                                                                                                                                     |
| N | Q11HC6 | DE | Sec-independent protein translocase protein tatB homolog;                                                                                                                                                                                                             |
| N | Q11HC6 | DR | protein secretion                                                                                                                                                                                                                                                     |
| N | Q11HC6 | DR | protein transport by the Tat complex                                                                                                                                                                                                                                  |
| N | Q11HC6 | DR | protein transporter activity                                                                                                                                                                                                                                          |
| N | Q11IE7 | DE | Putative 3-methyladenine DNA glycosylase;                                                                                                                                                                                                                             |
| N | Q11IE7 | DR | alkylbase DNA N-glycosylase activity                                                                                                                                                                                                                                  |
| N | Q11IE7 | DR | base-excision repair                                                                                                                                                                                                                                                  |
| N | Q11QA3 | DE | 50S ribosomal protein L10;                                                                                                                                                                                                                                            |
| N | Q11QA3 | DR | ribosome biogenesis                                                                                                                                                                                                                                                   |
| N | Q11QA3 | DR | structural constituent of ribosome                                                                                                                                                                                                                                    |
| N | Q11QA6 | CC | DNA-dependent RNA polymerase catalyzes the transcription of DNA into RNA using the four ribonucleoside triphosphates as substrates.                                                                                                                                   |
| N | Q11QA6 | DE | DNA-directed RNA polymerase subunit beta';                                                                                                                                                                                                                            |
| N | Q11QA6 | DE | RNA polymerase subunit beta';                                                                                                                                                                                                                                         |
| N | Q11QA6 | DE | RNAP subunit beta';                                                                                                                                                                                                                                                   |
| N | Q11QA6 | DE | Transcriptase subunit beta';                                                                                                                                                                                                                                          |
| N | Q11QA6 | DR | DNA-directed RNA polymerase activity                                                                                                                                                                                                                                  |
| N | Q11QC7 | CC | This protein binds to the 23S rRNA, and is important in its secondary structure                                                                                                                                                                                       |
| N | Q11QC7 | CC | It is located near the subunit interface in the base of the L7/L12 stalk, and near the tRNA binding site of the peptidyltransferase center (By similarity).                                                                                                           |
| N | Q11QC7 | DE | 50S ribosomal protein L6;                                                                                                                                                                                                                                             |
| N | Q11QC7 | DR | structural constituent of ribosome                                                                                                                                                                                                                                    |
| N | Q11R71 | CC | Activates KDO (a required 8-carbon sugar) for incorporation into bacterial lipopolysaccharide in Gram-negative bacteria (By similarity).                                                                                                                              |
| N | Q11R71 | DE | 3-deoxy-manno-octulosonate cytidylyltransferase;                                                                                                                                                                                                                      |
| N | Q11R71 | DE | CMP-2-keto-3-deoxyoctulosonic acid synthase;                                                                                                                                                                                                                          |
| N | Q11R71 | DE | CMP-KDO synthase;                                                                                                                                                                                                                                                     |
| N | Q11R71 | DR | 3-deoxy-manno-octulosonate cytidylyltransferase activity                                                                                                                                                                                                              |
| N | Q11R71 | DR | lipopolysaccharide biosynthetic process                                                                                                                                                                                                                               |
| N | Q12348 | CC | Component of the COP9 signalosome (CSN) complex that acts as an regulator of the ubiquitin (Ubl) conjugation pathway by mediating the deneddylation of the cullin subunit of SCF-type E3 ubiquitin-protein ligase complexes                                           |
| N | Q12348 | CC | The CSN complex is involved in the regulation of the mating pheromone response                                                                                                                                                                                        |
| N | Q12348 | DE | COP9 signalosome complex subunit 10;                                                                                                                                                                                                                                  |
| N | Q12348 | DR | adaptation of signaling pathway by response to pheromone involved in conjugation with cellular fusion                                                                                                                                                                 |
| N | Q12348 | DR | cullin deneddylation                                                                                                                                                                                                                                                  |
| N | Q12348 | DR | protein binding                                                                                                                                                                                                                                                       |
| N | Q12425 | CC | Involved in the assembly of mitochondrial and cytoplasmic iron-sulfur proteins                                                                                                                                                                                        |
| N | Q12425 | CC | Probably involved in the binding of an intermediate of Fe/S cluster assembly.                                                                                                                                                                                         |
| N | Q12425 | DE | Iron-sulfur assembly protein 2;                                                                                                                                                                                                                                       |
| N | Q12425 | DR | biotin biosynthetic process                                                                                                                                                                                                                                           |
| N | Q12425 | DR | iron-sulfur cluster assembly                                                                                                                                                                                                                                          |
| N | Q12425 | DR | iron-sulfur cluster binding                                                                                                                                                                                                                                           |
| N | Q12425 | DR | protein maturation                                                                                                                                                                                                                                                    |
| N | Q12425 | DR | structural molecule activity                                                                                                                                                                                                                                          |
| N | Q12493 | CC | Component of the central kinetochore, which mediates the attachment of the centromere to the mitotic spindle by forming essential interactions between the microtubule-associated outer kinetochore proteins and the centromere-associated inner kinetochore proteins |
| N | Q12493 | CC | Required for establishing bipolar spindle- microtubule attachments and proper chromosome segregation.                                                                                                                                                                 |
| N | Q12493 | DE | Central kinetochore subunit NKP1;                                                                                                                                                                                                                                     |
| N | Q12493 | DE | Non-essential kinetochore protein 1;                                                                                                                                                                                                                                  |
| N | Q12493 | DR | cell division                                                                                                                                                                                                                                                         |
| N | Q12493 | DR | protein binding                                                                                                                                                                                                                                                       |

|   |        |    |                                                                                                                                                                                  |
|---|--------|----|----------------------------------------------------------------------------------------------------------------------------------------------------------------------------------|
| N | Q12530 | CC | Functions as part of ribonuclease MRP (RNase MRP), which is involved in rRNA processing in mitochondria.                                                                         |
| N | Q12530 | DE | RNA-processing protein RMP1;                                                                                                                                                     |
| N | Q12530 | DE | RNase MRP 23.6 kDa subunit;                                                                                                                                                      |
| N | Q12530 | DE | Ribonuclease MRP protein subunit RMP1;                                                                                                                                           |
| N | Q12530 | DR | mRNA cleavage                                                                                                                                                                    |
| N | Q12530 | DR | maturation of 5.8S rRNA from tricistronic rRNA transcript (SSU-rRNA, 5.8S rRNA, LSU-rRNA)                                                                                        |
| N | Q12545 | CC | Catalyzes the oxidation of 3-carboxy-2-hydroxy-4- methylpentanoate (3-isopropylmalate) to 3-carboxy-4-methyl-2- oxopentanoate                                                    |
| N | Q12545 | CC | The product decarboxylates to 4-methyl-2 oxopentanoate.                                                                                                                          |
| N | Q12545 | DE | 3-isopropylmalate dehydrogenase;                                                                                                                                                 |
| N | Q12545 | DE | Beta-IPM dehydrogenase;                                                                                                                                                          |
| N | Q12545 | DR | 3-isopropylmalate dehydrogenase activity                                                                                                                                         |
| N | Q12545 | DR | leucine biosynthetic process                                                                                                                                                     |
| N | Q12545 | DR | magnesium ion binding                                                                                                                                                            |
| N | Q12545 | DR | oxidation-reduction process                                                                                                                                                      |
| N | Q12578 | DE | Imidazoleglycerol-phosphate dehydratase;                                                                                                                                         |
| N | Q12578 | DR | histidine biosynthetic process                                                                                                                                                   |
| N | Q12578 | DR | imidazoleglycerol-phosphate dehydratase activity                                                                                                                                 |
| N | Q12609 | CC | may be involved in the hydroxylation of averanun to form 5 -hydroxyaveranun, oxidation of averufin to 1- hydroxyversicolorone and its oxidation to versiconal hemiacetal acetate |
| N | Q12609 | DE | Cytochrome P450 6A2;                                                                                                                                                             |
| N | Q12609 | DE | Probable sterigmatocystin biosynthesis P450 monooxygenase stcF;                                                                                                                  |
| N | Q12609 | DR | electron carrier activity                                                                                                                                                        |
| N | Q12609 | DR | monooxygenase activity                                                                                                                                                           |
| N | Q12609 | DR | oxidation-reduction process                                                                                                                                                      |
| N | Q126J2 | CC | Carrier of the growing fatty acid chain in fatty acid biosynthesis (By similarity).                                                                                              |
| N | Q126J2 | DE | Acyl carrier protein;                                                                                                                                                            |
| N | Q126J2 | DR | acyl carrier activity                                                                                                                                                            |
| N | Q126J2 | DR | cofactor binding                                                                                                                                                                 |
| N | Q126J2 | DR | fatty acid biosynthetic process                                                                                                                                                  |
| N | Q126J2 | DR | phosphopantetheine binding                                                                                                                                                       |
| N | Q12765 | CC | Regulates exocytosis in mast cells                                                                                                                                               |
| N | Q12765 | CC | Increases both the extent of secretion and the sensitivity of mast cells to stimulation with calcium (By similarity).                                                            |
| N | Q12765 | DR | dipeptidase activity                                                                                                                                                             |
| N | Q12887 | CC | Converts protoheme IX and farnesyl diphosphate to heme O (By similarity).                                                                                                        |
| N | Q12887 | DE | Heme O synthase;                                                                                                                                                                 |
| N | Q12887 | DE | Protoheme IX farnesyltransferase, mitochondrial;                                                                                                                                 |
| N | Q12887 | DR | heme O biosynthetic process                                                                                                                                                      |
| N | Q12887 | DR | heme a biosynthetic process                                                                                                                                                      |
| N | Q12887 | DR | mitochondrial electron transport, cytochrome c to oxygen                                                                                                                         |
| N | Q12887 | DR | protoheme IX farnesyltransferase activity                                                                                                                                        |
| N | Q12887 | DR | respiratory chain complex IV assembly                                                                                                                                            |
| N | Q12950 | DE | Forkhead box protein D4;                                                                                                                                                         |
| N | Q12950 | DE | Forkhead-related protein FKHL9;                                                                                                                                                  |
| N | Q12950 | DE | Forkhead-related transcription factor 5;                                                                                                                                         |
| N | Q12950 | DE | Myeloid factor-alpha;                                                                                                                                                            |
| N | Q12950 | DR | DNA bending activity                                                                                                                                                             |
| N | Q12950 | DR | axon extension involved in axon guidance                                                                                                                                         |
| N | Q12950 | DR | cartilage development                                                                                                                                                            |
| N | Q12950 | DR | dichotomous subdivision of terminal units involved in ureteric bud branching                                                                                                     |
| N | Q12950 | DR | double-stranded DNA binding                                                                                                                                                      |
| N | Q12950 | DR | embryo development                                                                                                                                                               |
| N | Q12950 | DR | enteric nervous system development                                                                                                                                               |
| N | Q12950 | DR | iridophore differentiation                                                                                                                                                       |
| N | Q12950 | DR | lateral line nerve glial cell development                                                                                                                                        |
| N | Q12950 | DR | melanocyte differentiation                                                                                                                                                       |
| N | Q12950 | DR | negative regulation of gene-specific transcription from RNA polymerase II promoter                                                                                               |
| N | Q12950 | DR | neural crest cell migration                                                                                                                                                      |
| N | Q12950 | DR | pattern specification process                                                                                                                                                    |
| N | Q12950 | DR | peripheral nervous system development                                                                                                                                            |
| N | Q12950 | DR | positive regulation of BMP signaling pathway                                                                                                                                     |
| N | Q12950 | DR | positive regulation of kidney development                                                                                                                                        |

|   |        |    |                                                                                                                                                                            |
|---|--------|----|----------------------------------------------------------------------------------------------------------------------------------------------------------------------------|
| N | Q12950 | DR | positive regulation of transcription from RNA polymerase II promoter                                                                                                       |
| N | Q12950 | DR | promoter binding                                                                                                                                                           |
| N | Q12950 | DR | regulation of sequence-specific DNA binding transcription factor activity                                                                                                  |
| N | Q12950 | DR | sequence-specific enhancer binding RNA polymerase II transcription factor activity                                                                                         |
| N | Q12950 | DR | specific RNA polymerase II transcription factor activity                                                                                                                   |
| N | Q12950 | DR | specific transcriptional repressor activity                                                                                                                                |
| N | Q12950 | DR | sympathetic nervous system development                                                                                                                                     |
| N | Q12950 | DR | transcription activator activity                                                                                                                                           |
| N | Q12950 | DR | transcription factor binding                                                                                                                                               |
| N | Q12GX1 | CC | One of the primary rRNA binding proteins, it binds directly near the 3'-end of the 23S rRNA, where it nucleates assembly of the 50S subunit (By similarity).               |
| N | Q12GX1 | DE | 50S ribosomal protein L3;                                                                                                                                                  |
| N | Q12GX1 | DR | structural constituent of ribosome                                                                                                                                         |
| N | Q12PA3 | CC | The UvrABC repair system catalyzes the recognition and processing of DNA lesions                                                                                           |
| N | Q12PA3 | CC | The N-terminal half is responsible for the 3' incision and the C-terminal half is responsible for the 5' incision (By similarity).                                         |
| N | Q12PA3 | CC | UvrC both incises the 5' and 3' sides of the lesion                                                                                                                        |
| N | Q12PA3 | DE | Excinuclease ABC subunit C;                                                                                                                                                |
| N | Q12PA3 | DE | Protein uvrC;                                                                                                                                                              |
| N | Q12PA3 | DE | UvrABC system protein C;                                                                                                                                                   |
| N | Q12PA3 | DR | excinuclease ABC activity                                                                                                                                                  |
| N | Q12PA3 | DR | nucleotide-excision repair                                                                                                                                                 |
| N | Q12QK6 | CC | NQR complex catalyzes the reduction of ubiquinone-1 to ubiquinol by two successive reactions, coupled with the transport of Na(+) ions from the cytoplasm to the periplasm |
| N | Q12QK6 | CC | NqrA to nqrE are probably involved in the second step, the conversion of ubisemiquinone to ubiquinol (By similarity).                                                      |
| N | Q12QK6 | DE | NQR complex subunit A;                                                                                                                                                     |
| N | Q12QK6 | DE | NQR-1 subunit A;                                                                                                                                                           |
| N | Q12QK6 | DE | Na(+)-NQR subunit A;                                                                                                                                                       |
| N | Q12QK6 | DE | Na(+)-translocating NADH-quinone reductase subunit A;                                                                                                                      |
| N | Q12QK6 | DE | Na(+)-translocating NQR subunit A;                                                                                                                                         |
| N | Q12QK6 | DR | oxidation-reduction process                                                                                                                                                |
| N | Q12QK6 | DR | oxidoreductase activity, acting on NADH or NADPH, quinone or similar compound as acceptor                                                                                  |
| N | Q12QK6 | DR | sodium ion transport                                                                                                                                                       |
| N | Q12R24 | CC | Involved in rRNA and/or ribosome maturation and assembly                                                                                                                   |
| N | Q12R24 | CC | May have metal-dependent hydrolase activity (By similarity).                                                                                                               |
| N | Q12R24 | CC | Required for normal 5' and 3' processing of 16S, 23S and 5S rRNAs                                                                                                          |
| N | Q12R24 | DE | Probable rRNA maturation factor;                                                                                                                                           |
| N | Q12R24 | DR | metal ion binding                                                                                                                                                          |
| N | Q12R24 | DR | metalloendopeptidase activity                                                                                                                                              |
| N | Q12R24 | DR | rRNA processing                                                                                                                                                            |
| N | Q12S01 | CC | Synthesis of 3-octaprenyl-4-hydroxybenzoate (By similarity).                                                                                                               |
| N | Q12S01 | DE | 4-HB polyprenyltransferase;                                                                                                                                                |
| N | Q12S01 | DE | 4-hydroxybenzoate octaprenyltransferase;                                                                                                                                   |
| N | Q12S01 | DR | prenyltransferase activity                                                                                                                                                 |
| N | Q12S01 | DR | ubiquinone biosynthetic process                                                                                                                                            |
| N | Q12SW9 | CC | Binds directly to 23S rRNA                                                                                                                                                 |
| N | Q12SW9 | CC | The L1 stalk is quite mobile in the ribosome, and is involved in E site tRNA release (By similarity).                                                                      |
| N | Q12SW9 | DE | 50S ribosomal protein L1;                                                                                                                                                  |
| N | Q12SW9 | DR | RNA processing                                                                                                                                                             |
| N | Q12SW9 | DR | regulation of translation                                                                                                                                                  |
| N | Q12SW9 | DR | structural constituent of ribosome                                                                                                                                         |
| N | Q12VF1 | CC | Specifically catalyzes the NAD or NADP-dependent dehydrogenation of L-aspartate to iminoaspartate (By similarity).                                                         |
| N | Q12VF1 | DE | Probable L-aspartate dehydrogenase;                                                                                                                                        |
| N | Q12VF1 | DR | NAD biosynthetic process                                                                                                                                                   |
| N | Q12VF1 | DR | NADP catabolic process                                                                                                                                                     |
| N | Q12VF1 | DR | aspartate dehydrogenase activity                                                                                                                                           |
| N | Q12VF1 | DR | oxidation-reduction process                                                                                                                                                |
| N | Q12ZG1 | DE | Dihydrodipicolinate reductase;                                                                                                                                             |
| N | Q12ZG1 | DR | diaminopimelate biosynthetic process                                                                                                                                       |
| N | Q12ZG1 | DR | dihydrodipicolinate reductase activity                                                                                                                                     |
| N | Q12ZG1 | DR | oxidation-reduction process                                                                                                                                                |

|   |        |    |                                                                                                                                                                        |
|---|--------|----|------------------------------------------------------------------------------------------------------------------------------------------------------------------------|
| N | Q12ZT1 | CC | with S4 and S12 plays an important role in translational accuracy (By similarity)                                                                                      |
| N | Q12ZT1 | DE | 30S ribosomal protein S5P;                                                                                                                                             |
| N | Q12ZT1 | DR | structural constituent of ribosome                                                                                                                                     |
| N | Q13045 | CC | May play a role as coactivator in transcriptional activation by hormone-activated nuclear receptors (NR) and acts in cooperation with NCOA2 and CARM1                  |
| N | Q13045 | CC | Involved in early embryonic development (By similarity)                                                                                                                |
| N | Q13045 | CC | Involved in estrogen hormone signaling                                                                                                                                 |
| N | Q13045 | CC | May play a role in regulation of cytoskeletal rearrangements involved in cytokinesis and cell migration.                                                               |
| N | Q13045 | DE | Protein flightless-1 homolog;                                                                                                                                          |
| N | Q13045 | DR | actin binding                                                                                                                                                          |
| N | Q13045 | DR | multicellular organismal development                                                                                                                                   |
| N | Q13045 | DR | muscle contraction                                                                                                                                                     |
| N | Q13445 | CC | Potential role in protein trafficking.                                                                                                                                 |
| N | Q13445 | DE | Interleukin-1 receptor-like 1 ligand;                                                                                                                                  |
| N | Q13445 | DE | Putative T1/ST2 receptor-binding protein;                                                                                                                              |
| N | Q13445 | DE | Transmembrane emp24 domain-containing protein 1;                                                                                                                       |
| N | Q13445 | DR | cell-cell signaling                                                                                                                                                    |
| N | Q13445 | DR | receptor binding                                                                                                                                                       |
| N | Q13445 | DR | signal transduction                                                                                                                                                    |
| N | Q13465 | DE | MDS1 and EVI1 complex locus protein MDS1;                                                                                                                              |
| N | Q13465 | DE | Myelodysplasia syndrome 1 protein;                                                                                                                                     |
| N | Q13465 | DE | Myelodysplasia syndrome-associated protein 1;                                                                                                                          |
| N | Q13465 | DR | sequence-specific DNA binding transcription factor activity                                                                                                            |
| N | Q13541 | CC | Regulates eIF4E activity by preventing its assembly into the eIF4F complex                                                                                             |
| N | Q13541 | CC | Mediates the regulation of protein translation by hormones, growth factors and other stimuli that signal through the MAP kinase and mTORC1 pathways.                   |
| N | Q13541 | DE | Eukaryotic translation initiation factor 4E-binding protein 1;                                                                                                         |
| N | Q13541 | DE | Phosphorylated heat- and acid-stable protein regulated by insulin 1;                                                                                                   |
| N | Q13541 | DE | eIF4E-binding protein 1;                                                                                                                                               |
| N | Q13541 | DR | G1/S transition of mitotic cell cycle                                                                                                                                  |
| N | Q13541 | DR | TOR signaling cascade                                                                                                                                                  |
| N | Q13541 | DR | insulin receptor signaling pathway                                                                                                                                     |
| N | Q13541 | DR | positive regulation of mitotic cell cycle                                                                                                                              |
| N | Q13547 | CC | Responsible for the deacetylation of lysine residues on the N-terminal part of the core histones (H2A, H2B, H3 and H4)                                                 |
| N | Q13547 | CC | Component of the BRG1-RB1-HDAC1 complex, which negatively regulates the CREST- mediated transcription in resting neurons                                               |
| N | Q13547 | CC | Deacetylates 'Lys-310' in RELA and thereby inhibits the transcriptional activity of NF-kappa-B.                                                                        |
| N | Q13547 | CC | Deacetylates SP proteins, SP1 and SP3, and regulates their function                                                                                                    |
| N | Q13547 | CC | Deacetylates TSHZ3 and regulates its transcriptional repressor activity                                                                                                |
| N | Q13547 | CC | Histone deacetylases act via the formation of large multiprotein complexes                                                                                             |
| N | Q13547 | CC | Histone deacetylation gives a tag for epigenetic repression and plays an important role in transcriptional regulation, cell cycle progression and developmental events |
| N | Q13547 | CC | Upon calcium stimulation, HDAC1 is released from the complex and CREBBP is recruited, which facilitates transcriptional activation                                     |
| N | Q13547 | DE | Histone deacetylase 1;                                                                                                                                                 |
| N | Q13547 | DR | NAD-dependent histone deacetylase activity (H3-K14 specific)                                                                                                           |
| N | Q13547 | DR | NAD-dependent histone deacetylase activity (H3-K9 specific)                                                                                                            |
| N | Q13547 | DR | NAD-dependent histone deacetylase activity (H4-K16 specific)                                                                                                           |
| N | Q13547 | DR | anti-apoptosis                                                                                                                                                         |
| N | Q13547 | DR | blood coagulation                                                                                                                                                      |
| N | Q13547 | DR | chromatin remodeling                                                                                                                                                   |
| N | Q13547 | DR | embryonic digit morphogenesis                                                                                                                                          |
| N | Q13547 | DR | epidermal cell differentiation                                                                                                                                         |
| N | Q13547 | DR | eyelid development in camera-type eye                                                                                                                                  |
| N | Q13547 | DR | fungiform papilla formation                                                                                                                                            |
| N | Q13547 | DR | hair follicle placode formation                                                                                                                                        |
| N | Q13547 | DR | histone H3 deacetylation                                                                                                                                               |
| N | Q13547 | DR | histone H4 deacetylation                                                                                                                                               |
| N | Q13547 | DR | histone deacetylase activity (H3-K16 specific)                                                                                                                         |
| N | Q13547 | DR | histone deacetylase binding                                                                                                                                            |
| N | Q13547 | DR | identical protein binding                                                                                                                                              |
| N | Q13547 | DR | negative regulation by host of viral transcription                                                                                                                     |

|   |        |    |                                                                                                                                                                                              |
|---|--------|----|----------------------------------------------------------------------------------------------------------------------------------------------------------------------------------------------|
| N | Q13547 | DR | negative regulation of cell cycle                                                                                                                                                            |
| N | Q13547 | DR | negative regulation of gene-specific transcription from RNA polymerase II promoter                                                                                                           |
| N | Q13547 | DR | nerve growth factor receptor signaling pathway                                                                                                                                               |
| N | Q13547 | DR | odontogenesis of dentine-containing tooth                                                                                                                                                    |
| N | Q13547 | DR | positive regulation of cell proliferation                                                                                                                                                    |
| N | Q13547 | DR | positive regulation of gene-specific transcription from RNA polymerase II promoter                                                                                                           |
| N | Q13547 | DR | positive regulation of receptor biosynthetic process                                                                                                                                         |
| N | Q13547 | DR | sequence-specific DNA binding transcription factor activity                                                                                                                                  |
| N | Q13547 | DR | specific transcriptional repressor activity                                                                                                                                                  |
| N | Q13547 | DR | transcription activator activity                                                                                                                                                             |
| N | Q13547 | DR | transcription factor binding                                                                                                                                                                 |
| N | Q136H4 | CC | Catalyzes the attachment of serine to tRNA(Ser)                                                                                                                                              |
| N | Q136H4 | CC | Is also able to aminoacylate tRNA(Sec) with serine, to form the misacylated tRNA L-seryl-tRNA(Sec), which will be further converted into selenocysteinyl-tRNA(Sec) (By similarity).          |
| N | Q136H4 | DE | Serine--tRNA ligase;                                                                                                                                                                         |
| N | Q136H4 | DE | Seryl-tRNA synthetase;                                                                                                                                                                       |
| N | Q136H4 | DE | Seryl-tRNA(Ser/Sec) synthetase;                                                                                                                                                              |
| N | Q136H4 | DR | serine-tRNA ligase activity                                                                                                                                                                  |
| N | Q136H4 | DR | seryl-tRNA aminoacylation                                                                                                                                                                    |
| N | Q136W1 | CC | Transfers the 4'-phosphopantetheine moiety from coenzyme A to a Ser of acyl-carrier-protein (By similarity).                                                                                 |
| N | Q136W1 | DE | 4'-phosphopantetheinyl transferase AcpS;                                                                                                                                                     |
| N | Q136W1 | DE | Holo-ACP synthase;                                                                                                                                                                           |
| N | Q136W1 | DE | Holo-[acyl-carrier-protein] synthase;                                                                                                                                                        |
| N | Q136W1 | DR | fatty acid biosynthetic process                                                                                                                                                              |
| N | Q136W1 | DR | holo-[acyl-carrier-protein] synthase activity                                                                                                                                                |
| N | Q136W1 | DR | macromolecule biosynthetic process                                                                                                                                                           |
| N | Q136W1 | DR | magnesium ion binding                                                                                                                                                                        |
| N | Q13829 | CC | Substrate-specific adapter of a BCR (BTB-CUL3-RBX1) E3 ubiquitin-protein ligase complex involved in regulation of cytoskeleton structure                                                     |
| N | Q13829 | CC | Its interaction with RHOB may regulate apoptosis                                                                                                                                             |
| N | Q13829 | CC | May enhance the PCNA-dependent DNA polymerase delta activity.                                                                                                                                |
| N | Q13829 | CC | The BCR(BACURD2) E3 ubiquitin ligase complex mediates the ubiquitination of RHOA, leading to its degradation by the proteasome, thereby regulating the actin cytoskeleton and cell migration |
| N | Q13829 | DE | BTB/POZ domain-containing adapter for CUL3-mediated RHOA degradation                                                                                                                         |
| N | Q13829 | DE | BTB/POZ domain-containing protein TNFAIP1;                                                                                                                                                   |
| N | Q13829 | DE | Protein B12;                                                                                                                                                                                 |
| N | Q13829 | DE | Tumor necrosis factor, alpha-induced protein 1, endothelial;                                                                                                                                 |
| N | Q13829 | DR | DNA replication                                                                                                                                                                              |
| N | Q13829 | DR | GTP-Rho binding                                                                                                                                                                              |
| N | Q13829 | DR | cell migration                                                                                                                                                                               |
| N | Q13829 | DR | embryo development                                                                                                                                                                           |
| N | Q13829 | DR | immune response                                                                                                                                                                              |
| N | Q13829 | DR | negative regulation of Rho protein signal transduction                                                                                                                                       |
| N | Q13829 | DR | proteasomal ubiquitin-dependent protein catabolic process                                                                                                                                    |
| N | Q13829 | DR | protein ubiquitination                                                                                                                                                                       |
| N | Q13829 | DR | stress fiber assembly                                                                                                                                                                        |
| N | Q13829 | DR | voltage-gated potassium channel activity                                                                                                                                                     |
| N | Q13885 | CC | Tubulin is the major constituent of microtubules                                                                                                                                             |
| N | Q13885 | CC | It binds two moles of GTP, one at an exchangeable site on the beta chain and one at a non-exchangeable site on the alpha-chain (By similarity).                                              |
| N | Q13885 | DE | Tubulin beta-2A chain;                                                                                                                                                                       |
| N | Q13885 | DR | 'de novo' posttranslational protein folding                                                                                                                                                  |
| N | Q13885 | DR | GTPase activity                                                                                                                                                                              |
| N | Q13885 | DR | microtubule-based movement                                                                                                                                                                   |
| N | Q13885 | DR | protein binding                                                                                                                                                                              |
| N | Q13885 | DR | protein polymerization                                                                                                                                                                       |
| N | Q13885 | DR | structural molecule activity                                                                                                                                                                 |
| N | Q13EL3 | CC | Catalyzes the formation of N(7)-methylguanine at position 46 (m7G46) in tRNA (By similarity).                                                                                                |
| N | Q13EL3 | DE | tRNA (guanine-N(7)-)-methyltransferase;                                                                                                                                                      |
| N | Q13EL3 | DE | tRNA(m7G46)-methyltransferase;                                                                                                                                                               |
| N | Q13EL3 | DR | tRNA (guanine-N7-)-methyltransferase activity                                                                                                                                                |

|   |        |    |                                                                                                                                                                                                     |
|---|--------|----|-----------------------------------------------------------------------------------------------------------------------------------------------------------------------------------------------------|
| N | Q13TI6 | CC | This is one of the proteins that binds and probably mediates the attachment of the 5S RNA into the large ribosomal subunit, where it forms part of the central protuberance (By similarity).        |
| N | Q13TI6 | DE | 50S ribosomal protein L18;                                                                                                                                                                          |
| N | Q13TI6 | DR | structural constituent of ribosome                                                                                                                                                                  |
| N | Q13TY3 | DE | Protein MraZ;                                                                                                                                                                                       |
| N | Q13W50 | CC | Catalyzes the conversion of glucosamine-6-phosphate to glucosamine-1-phosphate (By similarity).                                                                                                     |
| N | Q13W50 | DE | Phosphoglucosamine mutase;                                                                                                                                                                          |
| N | Q13W50 | DR | carbohydrate metabolic process                                                                                                                                                                      |
| N | Q13W50 | DR | magnesium ion binding                                                                                                                                                                               |
| N | Q13W50 | DR | phosphoglucosamine mutase activity                                                                                                                                                                  |
| N | Q14119 | CC | Possible transcription factor                                                                                                                                                                       |
| N | Q14119 | CC | Specifically binds to the CT/GC-rich region of the interleukin-3 promoter and mediates tax transactivation of IL-3.                                                                                 |
| N | Q14119 | DE | Putative transcription factor DB1;                                                                                                                                                                  |
| N | Q14119 | DE | Vascular endothelial zinc finger 1;                                                                                                                                                                 |
| N | Q14119 | DE | Zinc finger protein 161;                                                                                                                                                                            |
| N | Q14119 | DR | cellular defense response                                                                                                                                                                           |
| N | Q14119 | DR | regulation of transcription from RNA polymerase II promoter                                                                                                                                         |
| N | Q14119 | DR | specific RNA polymerase II transcription factor activity                                                                                                                                            |
| N | Q14119 | DR | zinc ion binding                                                                                                                                                                                    |
| N | Q142T1 | CC | Removes the pyruvyl group from chorismate, with concomitant aromatization of the ring, to provide 4- hydroxybenzoate (4HB) for the ubiquinone pathway (By similarity)                               |
| N | Q142T1 | DE | Probable chorismate--pyruvate lyase;                                                                                                                                                                |
| N | Q142T1 | DR | chorismate lyase activity                                                                                                                                                                           |
| N | Q142T1 | DR | ubiquinone biosynthetic process                                                                                                                                                                     |
| N | Q14439 | CC | Orphan receptor.                                                                                                                                                                                    |
| N | Q14439 | DE | Probable G-protein coupled receptor 176;                                                                                                                                                            |
| N | Q14439 | DR | G-protein coupled receptor activity                                                                                                                                                                 |
| N | Q14439 | DR | synaptic transmission                                                                                                                                                                               |
| N | Q14865 | CC | DNA-binding protein that binds to the 5'-AATA[CT]-3' core sequence                                                                                                                                  |
| N | Q14865 | CC | May be involved in lipid stores. Overexpression leads to induction of smooth muscle marker genes, suggesting that it may act as a regulator of smooth muscle cell differentiation and proliferation |
| N | Q14865 | CC | Probably acts as a transcription regulator                                                                                                                                                          |
| N | Q14865 | CC | Represses the cytomegalovirus enhancer                                                                                                                                                              |
| N | Q14865 | DE | ARID domain-containing protein 5B;                                                                                                                                                                  |
| N | Q14865 | DE | AT-rich interactive domain-containing protein 5B;                                                                                                                                                   |
| N | Q14865 | DE | MRF1-like protein;                                                                                                                                                                                  |
| N | Q14865 | DE | Modulator recognition factor 2;                                                                                                                                                                     |
| N | Q14865 | DR | negative regulation of transcription, DNA-dependent                                                                                                                                                 |
| N | Q14865 | DR | transcription repressor activity                                                                                                                                                                    |
| N | Q148G4 | CC | Putative deoxyribonuclease (By similarity).                                                                                                                                                         |
| N | Q148G4 | DE | Putative deoxyribonuclease TATDN1;                                                                                                                                                                  |
| N | Q148G4 | DR | endodeoxyribonuclease activity, producing 5'-phosphomonoesters                                                                                                                                      |
| N | Q14CN4 | CC | Has a role in hair formation                                                                                                                                                                        |
| N | Q14CN4 | CC | Specific component of keratin intermediate filaments in the inner root sheath (IRS) of the hair follicle (Probable).                                                                                |
| N | Q14CN4 | DE | Cytokeratin-72;                                                                                                                                                                                     |
| N | Q14CN4 | DE | Keratin, type II cytoskeletal 72;                                                                                                                                                                   |
| N | Q14CN4 | DE | Type II inner root sheath-specific keratin-K6irs2;                                                                                                                                                  |
| N | Q14CN4 | DE | Type-II keratin Kb35;                                                                                                                                                                               |
| N | Q14CN4 | DR | structural molecule activity                                                                                                                                                                        |
| N | Q14D33 | DE | Uncharacterized protein C2orf85;                                                                                                                                                                    |
| N | Q14FG6 | CC | DNA-dependent RNA polymerase catalyzes the transcription of DNA into RNA using the four ribonucleoside triphosphates as substrates.                                                                 |
| N | Q14FG6 | DE | DNA-directed RNA polymerase subunit beta';                                                                                                                                                          |
| N | Q14FG6 | DE | Plastid-encoded RNA polymerase subunit beta';                                                                                                                                                       |
| N | Q14FG6 | DE | RNA polymerase subunit beta';                                                                                                                                                                       |
| N | Q14FG6 | DR | DNA-directed RNA polymerase activity                                                                                                                                                                |
| N | Q14FH0 | CC | F(1)F(0) ATP synthase produces ATP from ADP in the presence of a proton or sodium gradient                                                                                                          |
| N | Q14FH0 | CC | During catalysis, ATP synthesis in the catalytic domain of F(1) is coupled via a rotary mechanism of the central stalk subunits to proton translocation (By similarity)                             |

|   |        |    |                                                                                                                                                                                                                  |
|---|--------|----|------------------------------------------------------------------------------------------------------------------------------------------------------------------------------------------------------------------|
| N | Q14FH0 | CC | F-type ATPases consist of two structural domains, F(1) containing the extramembraneous catalytic core and F(0) containing the membrane proton channel, linked together by a central stalk and a peripheral stalk |
| N | Q14FH0 | DE | ATP synthase F(0) sector subunit c;                                                                                                                                                                              |
| N | Q14FH0 | DE | ATP synthase subunit c, chloroplastic;                                                                                                                                                                           |
| N | Q14FH0 | DE | ATPase subunit III;                                                                                                                                                                                              |
| N | Q14FH0 | DE | F-ATPase subunit c;                                                                                                                                                                                              |
| N | Q14FH0 | DE | F-type ATPase subunit c;                                                                                                                                                                                         |
| N | Q14FH0 | DE | Lipid-binding protein;                                                                                                                                                                                           |
| N | Q14FH0 | DR | ATP hydrolysis coupled proton transport                                                                                                                                                                          |
| N | Q14FH0 | DR | ATP synthesis coupled proton transport                                                                                                                                                                           |
| N | Q14FH0 | DR | hydrogen ion transmembrane transporter activity                                                                                                                                                                  |
| N | Q14FH0 | DR | lipid binding                                                                                                                                                                                                    |
| N | Q14GK9 | CC | Catalyzes the pyruvoyl-dependent decarboxylation of aspartate to produce beta-alanine (By similarity).                                                                                                           |
| N | Q14GK9 | DE | Aspartate 1-decarboxylase alpha chain;                                                                                                                                                                           |
| N | Q14GK9 | DE | Aspartate 1-decarboxylase beta chain;                                                                                                                                                                            |
| N | Q14GK9 | DE | Aspartate 1-decarboxylase;                                                                                                                                                                                       |
| N | Q14GK9 | DE | Aspartate alpha-decarboxylase;                                                                                                                                                                                   |
| N | Q14GK9 | DR | alanine biosynthetic process                                                                                                                                                                                     |
| N | Q14GK9 | DR | aspartate 1-decarboxylase activity                                                                                                                                                                               |
| N | Q14GK9 | DR | pantothenate biosynthetic process                                                                                                                                                                                |
| N | Q14GR4 | CC | Catalyzes the interconversion of 2-phosphoglycerate and 3-phosphoglycerate (By similarity).                                                                                                                      |
| N | Q14GR4 | DE | 2,3-bisphosphoglycerate-independent phosphoglycerate mutase;                                                                                                                                                     |
| N | Q14GR4 | DE | BPG-independent PGAM;                                                                                                                                                                                            |
| N | Q14GR4 | DE | Phosphoglyceromutase;                                                                                                                                                                                            |
| N | Q14GR4 | DR | manganese ion binding                                                                                                                                                                                            |
| N | Q14GR4 | DR | phosphoglycerate mutase activity                                                                                                                                                                                 |
| N | Q14GX0 | CC | Participates actively in the response to hyperosmotic and heat shock by preventing the aggregation of stress-denatured proteins and by disaggregating proteins, also in an autonomous, dnaK-independent fashion  |
| N | Q14GX0 | CC | Also involved, together with dnaK and grpE, in the DNA replication of plasmids through activation of initiation proteins (By similarity).                                                                        |
| N | Q14GX0 | CC | GrpE releases ADP from dnaK; ATP binding to dnaK triggers the release of the substrate protein, thus completing the reaction cycle                                                                               |
| N | Q14GX0 | CC | Several rounds of ATP-dependent interactions between dnaJ, dnaK and grpE are required for fully efficient folding                                                                                                |
| N | Q14GX0 | CC | Unfolded proteins bind initially to dnaJ; upon interaction with the dnaJ-bound protein, dnaK hydrolyzes its bound ATP, resulting in the formation of a stable complex                                            |
| N | Q14GX0 | DE | Chaperone protein dnaJ;                                                                                                                                                                                          |
| N | Q14GX0 | DR | DNA replication                                                                                                                                                                                                  |
| N | Q14GX0 | DR | heat shock protein binding                                                                                                                                                                                       |
| N | Q14GX0 | DR | metal ion binding                                                                                                                                                                                                |
| N | Q14GX0 | DR | protein folding                                                                                                                                                                                                  |
| N | Q14GX0 | DR | response to heat                                                                                                                                                                                                 |
| N | Q14GX0 | DR | unfolded protein binding                                                                                                                                                                                         |
| N | Q14J06 | CC | First step of the lipid cycle reactions in the biosynthesis of the cell wall peptidoglycan (By similarity).                                                                                                      |
| N | Q14J06 | DE | Phospho-N-acetylmuramoyl-pentapeptide-transferase;                                                                                                                                                               |
| N | Q14J06 | DE | UDP-MurNAc-pentapeptide phosphotransferase;                                                                                                                                                                      |
| N | Q14J06 | DR | UDP-N-acetylmuramoyl-L-alanyl-D-glutamyl-meso-2,6-diaminopimelyl-D-alanyl-D-alanine:undecaprenyl-phosphate transferase activity                                                                                  |
| N | Q14J06 | DR | cell division                                                                                                                                                                                                    |
| N | Q14J06 | DR | cellular cell wall organization                                                                                                                                                                                  |
| N | Q14J06 | DR | peptidoglycan biosynthetic process                                                                                                                                                                               |
| N | Q14J06 | DR | phospho-N-acetylmuramoyl-pentapeptide-transferase activity                                                                                                                                                       |
| N | Q14J06 | DR | regulation of cell shape                                                                                                                                                                                         |
| N | Q15262 | CC | Regulation of processes involving cell contact and adhesion such as growth control, tumor invasion, and metastasis                                                                                               |
| N | Q15262 | CC | Beta-catenin may be a substrate for the catalytic activity of PTP- kappa.                                                                                                                                        |
| N | Q15262 | CC | Forms complexes with beta-catenin and gamma-catenin/plakoglobin                                                                                                                                                  |
| N | Q15262 | DE | Protein-tyrosine phosphatase kappa;                                                                                                                                                                              |
| N | Q15262 | DE | R-PTP-kappa;                                                                                                                                                                                                     |
| N | Q15262 | DE | Receptor-type tyrosine-protein phosphatase kappa;                                                                                                                                                                |

|   |        |    |                                                                                                                                                                                                                                             |
|---|--------|----|---------------------------------------------------------------------------------------------------------------------------------------------------------------------------------------------------------------------------------------------|
| N | Q15262 | DR | beta-catenin binding                                                                                                                                                                                                                        |
| N | Q15262 | DR | cell migration                                                                                                                                                                                                                              |
| N | Q15262 | DR | cellular response to UV                                                                                                                                                                                                                     |
| N | Q15262 | DR | cellular response to reactive oxygen species                                                                                                                                                                                                |
| N | Q15262 | DR | focal adhesion assembly                                                                                                                                                                                                                     |
| N | Q15262 | DR | gamma-catenin binding                                                                                                                                                                                                                       |
| N | Q15262 | DR | negative regulation of cell cycle                                                                                                                                                                                                           |
| N | Q15262 | DR | negative regulation of cell migration                                                                                                                                                                                                       |
| N | Q15262 | DR | negative regulation of keratinocyte proliferation                                                                                                                                                                                           |
| N | Q15262 | DR | protein dephosphorylation                                                                                                                                                                                                                   |
| N | Q15262 | DR | protein kinase binding                                                                                                                                                                                                                      |
| N | Q15262 | DR | protein localization at cell surface                                                                                                                                                                                                        |
| N | Q15262 | DR | transforming growth factor beta receptor signaling pathway                                                                                                                                                                                  |
| N | Q15262 | DR | transmembrane receptor protein tyrosine phosphatase activity                                                                                                                                                                                |
| N | Q15434 | DE | RNA-binding motif, single-stranded-interacting protein 2;                                                                                                                                                                                   |
| N | Q15434 | DE | Suppressor of CDC2 with RNA-binding motif 3;                                                                                                                                                                                                |
| N | Q15434 | DR | RNA processing                                                                                                                                                                                                                              |
| N | Q15434 | DR | nucleotide binding                                                                                                                                                                                                                          |
| N | Q15569 | CC | Dual specificity protein kinase activity catalyzing autophosphorylation and phosphorylation of exogenous substrates on both serine/threonine and tyrosine residues                                                                          |
| N | Q15569 | CC | Probably plays a central role at and after the meiotic phase of spermatogenesis (By similarity).                                                                                                                                            |
| N | Q15569 | DE | Dual specificity testis-specific protein kinase 1;                                                                                                                                                                                          |
| N | Q15569 | DE | Testicular protein kinase 1;                                                                                                                                                                                                                |
| N | Q15569 | DR | cell junction assembly                                                                                                                                                                                                                      |
| N | Q15569 | DR | metal ion binding                                                                                                                                                                                                                           |
| N | Q15569 | DR | protein binding                                                                                                                                                                                                                             |
| N | Q15569 | DR | protein phosphorylation                                                                                                                                                                                                                     |
| N | Q15569 | DR | protein serine/threonine kinase activity                                                                                                                                                                                                    |
| N | Q15569 | DR | protein tyrosine kinase activity                                                                                                                                                                                                            |
| N | Q15569 | DR | spermatogenesis                                                                                                                                                                                                                             |
| N | Q15NA2 | DE | UPF0391 membrane protein Pat1_4137;                                                                                                                                                                                                         |
| N | Q15P51 | CC | Provides the sole de novo source of dTMP for DNA biosynthesis (By similarity).                                                                                                                                                              |
| N | Q15P51 | DE | Thymidylate synthase;                                                                                                                                                                                                                       |
| N | Q15P51 | DR | dTMP biosynthetic process                                                                                                                                                                                                                   |
| N | Q15P51 | DR | thymidylate synthase activity                                                                                                                                                                                                               |
| N | Q15TR4 | CC | Catalyzes the methylthiolation of N6- (dimethylallyl)adenosine (i(6)A), leading to the formation of 2- methylthio-N6-(dimethylallyl)adenosine (ms(2)i(6)A) at position 37 in tRNAs that read codons beginning with uridine (By similarity). |
| N | Q15TR4 | DE | (Dimethylallyl)adenosine tRNA methylthiotransferase miaB;                                                                                                                                                                                   |
| N | Q15TR4 | DE | tRNA-i(6)A37 methylthiotransferase;                                                                                                                                                                                                         |
| N | Q15TR4 | DR | 4 iron, 4 sulfur cluster binding                                                                                                                                                                                                            |
| N | Q15TR4 | DR | metal ion binding                                                                                                                                                                                                                           |
| N | Q15TR4 | DR | tRNA modification                                                                                                                                                                                                                           |
| N | Q15TR4 | DR | transferase activity                                                                                                                                                                                                                        |
| N | Q15Z11 | DE | Protein CyaY;                                                                                                                                                                                                                               |
| N | Q164Y5 | CC | Part of the ABC transporter complex UgpABCE involved in sn-glycerol-3-phosphate import                                                                                                                                                      |
| N | Q164Y5 | CC | Responsible for energy coupling to the transport system (By similarity).                                                                                                                                                                    |
| N | Q164Y5 | DE | sn-glycerol-3-phosphate import ATP-binding protein UgpC;                                                                                                                                                                                    |
| N | Q164Y5 | DR | glycerol-3-phosphate-transporting ATPase activity                                                                                                                                                                                           |
| N | Q165U5 | CC | Catalyzes the attachment of alanine to tRNA(Ala) in a two-step reaction: alanine is first activated by ATP to form Ala- AMP and then transferred to the acceptor end of tRNA(Ala)                                                           |
| N | Q165U5 | CC | Also edits incorrectly charged Ser-tRNA(Ala) and Gly-tRNA(Ala) via its editing domain (By similarity).                                                                                                                                      |
| N | Q165U5 | DE | Alanine--tRNA ligase;                                                                                                                                                                                                                       |
| N | Q165U5 | DE | Alanyl-tRNA synthetase;                                                                                                                                                                                                                     |
| N | Q165U5 | DR | alanine-tRNA ligase activity                                                                                                                                                                                                                |
| N | Q165U5 | DR | alanyl-tRNA aminoacylation                                                                                                                                                                                                                  |
| N | Q165U5 | DR | metal ion binding                                                                                                                                                                                                                           |
| N | Q16982 | DE | Neurocalcin;                                                                                                                                                                                                                                |
| N | Q16982 | DR | calcium ion binding                                                                                                                                                                                                                         |
| N | Q16AD2 | CC | This is one of the proteins that binds and probably mediates the attachment of the 5S RNA into the large ribosomal subunit, where it forms part of the central protuberance                                                                 |



|   |        |    |                                                                                                                                                                                                                                                                                                                                           |
|---|--------|----|-------------------------------------------------------------------------------------------------------------------------------------------------------------------------------------------------------------------------------------------------------------------------------------------------------------------------------------------|
| N | Q16AD2 | CC | Contacts the P site tRNA; the 5S rRNA and some of its associated proteins might help stabilize positioning of ribosome-bound tRNAs (By similarity).                                                                                                                                                                                       |
| N | Q16AD2 | CC | In the 70S ribosome it contacts protein S13 of the 30S subunit (bridge B1b), connecting the 2 subunits; this bridge is implicated in subunit movement                                                                                                                                                                                     |
| N | Q16AD2 | DE | 50S ribosomal protein L5;                                                                                                                                                                                                                                                                                                                 |
| N | Q16AD2 | DR | structural constituent of ribosome                                                                                                                                                                                                                                                                                                        |
| N | Q16CZ1 | DE | Maf-like protein RD1_0437;                                                                                                                                                                                                                                                                                                                |
| N | Q17027 | CC | responsible for the anti Gram-positive activity of immune nematophyll (By similarity)                                                                                                                                                                                                                                                     |
| N | Q17027 | DR | defense response to bacterium                                                                                                                                                                                                                                                                                                             |
| N | Q17027 | DR | innate immune response                                                                                                                                                                                                                                                                                                                    |
| N | Q17QM9 | CC | Suppresses cannabinoid receptor CNR1-mediated tonic inhibition of voltage-gated calcium channels (By similarity).                                                                                                                                                                                                                         |
| N | Q17QM9 | DE | CB1 cannabinoid receptor-interacting protein 1;                                                                                                                                                                                                                                                                                           |
| N | Q17WI2 | CC | Nuclease that resolves Holliday junction intermediates in genetic recombination Cleaves the cruciform structure in supercoiled DNA by nicking to strands with the same polarity at sites symmetrically opposed at the junction in the homologous arms and leaves a 5'-terminal phosphate and a 3'-terminal hydroxyl group (By similarity) |
| N | Q17WI2 | CC |                                                                                                                                                                                                                                                                                                                                           |
| N | Q17WI2 | DE | Crossover junction endodeoxyribonuclease ruvC;                                                                                                                                                                                                                                                                                            |
| N | Q17WI2 | DE | Holliday junction nuclease ruvC;                                                                                                                                                                                                                                                                                                          |
| N | Q17WI2 | DE | Holliday junction resolvase ruvC;                                                                                                                                                                                                                                                                                                         |
| N | Q17WI2 | DR | DNA recombination                                                                                                                                                                                                                                                                                                                         |
| N | Q17WI2 | DR | crossover junction endodeoxyribonuclease activity                                                                                                                                                                                                                                                                                         |
| N | Q17WI2 | DR | metal ion binding                                                                                                                                                                                                                                                                                                                         |
| N | Q17WI2 | DR | nucleic acid binding                                                                                                                                                                                                                                                                                                                      |
| N | Q181G8 | CC | Catalyzes the phosphorylation of the position 2 hydroxy group of 4-diphosphocytidyl-2C-methyl-D-erythritol (By similarity).                                                                                                                                                                                                               |
| N | Q181G8 | DE | 4-(cytidine-5'-diphospho)-2-C-methyl-D-erythritol kinase;                                                                                                                                                                                                                                                                                 |
| N | Q181G8 | DE | 4-diphosphocytidyl-2-C-methyl-D-erythritol kinase;                                                                                                                                                                                                                                                                                        |
| N | Q181G8 | DR | 4-(cytidine 5'-diphospho)-2-C-methyl-D-erythritol kinase activity                                                                                                                                                                                                                                                                         |
| N | Q181G8 | DR | homoserine kinase activity                                                                                                                                                                                                                                                                                                                |
| N | Q181G8 | DR | terpenoid biosynthetic process                                                                                                                                                                                                                                                                                                            |
| N | Q181G8 | DR | threonine metabolic process                                                                                                                                                                                                                                                                                                               |
| N | Q182C0 | CC | Involved in DNA repair and recF pathway recombination (By similarity).                                                                                                                                                                                                                                                                    |
| N | Q182C0 | DE | DNA repair protein recO;                                                                                                                                                                                                                                                                                                                  |
| N | Q182C0 | DE | Recombination protein O;                                                                                                                                                                                                                                                                                                                  |
| N | Q182C0 | DR | ARF GTPase activator activity                                                                                                                                                                                                                                                                                                             |
| N | Q182C0 | DR | DNA recombination                                                                                                                                                                                                                                                                                                                         |
| N | Q182C0 | DR | regulation of ARF GTPase activity                                                                                                                                                                                                                                                                                                         |
| N | Q182C0 | DR | zinc ion binding                                                                                                                                                                                                                                                                                                                          |
| N | Q187P6 | CC | Component of the acetyl coenzyme A carboxylase (ACC) complex                                                                                                                                                                                                                                                                              |
| N | Q187P6 | CC | Biotin carboxylase (BC) catalyzes the carboxylation of biotin on its carrier protein (BCCP) and then the CO(2) group is transferred by the transcarboxylase to acetyl-CoA to form malonyl- CoA (By similarity).                                                                                                                           |
| N | Q187P6 | DE | ACCase subunit beta;                                                                                                                                                                                                                                                                                                                      |
| N | Q187P6 | DE | Acetyl-CoA carboxylase carboxyltransferase subunit beta;                                                                                                                                                                                                                                                                                  |
| N | Q187P6 | DE | Acetyl-coenzyme A carboxylase carboxyl transferase subunit beta;                                                                                                                                                                                                                                                                          |
| N | Q187P6 | DR | acetyl-CoA carboxylase activity                                                                                                                                                                                                                                                                                                           |
| N | Q187P6 | DR | fatty acid biosynthetic process                                                                                                                                                                                                                                                                                                           |
| N | Q187P6 | DR | metal ion binding                                                                                                                                                                                                                                                                                                                         |
| N | Q18CH5 | CC | This protein binds to the 23S rRNA, and is important in its secondary structure                                                                                                                                                                                                                                                           |
| N | Q18CH5 | CC | It is located near the subunit interface in the base of the L7/L12 stalk, and near the tRNA binding site of the peptidyltransferase center (By similarity).                                                                                                                                                                               |
| N | Q18CH5 | DE | 50S ribosomal protein L6;                                                                                                                                                                                                                                                                                                                 |
| N | Q18CH5 | DR | structural constituent of ribosome                                                                                                                                                                                                                                                                                                        |
| N | Q18PF5 | CC | Functions as an ammonia transporter                                                                                                                                                                                                                                                                                                       |
| N | Q18PF5 | CC | May play a role in the elimination of ammonia in the gill.                                                                                                                                                                                                                                                                                |
| N | Q18PF5 | DE | Ammonium transporter Rh type C 1;                                                                                                                                                                                                                                                                                                         |
| N | Q18PF5 | DE | Rh family type C glycoprotein 1;                                                                                                                                                                                                                                                                                                          |
| N | Q18PF5 | DE | Rh type C glycoprotein 1;                                                                                                                                                                                                                                                                                                                 |
| N | Q18PF5 | DE | Rhesus blood group family type C glycoprotein 1;                                                                                                                                                                                                                                                                                          |
| N | Q18PF5 | DR | ammonium transmembrane transporter activity                                                                                                                                                                                                                                                                                               |
| N | Q1AWG4 | DE | Threonine--tRNA ligase;                                                                                                                                                                                                                                                                                                                   |
| N | Q1AWG4 | DE | Threonyl-tRNA synthetase;                                                                                                                                                                                                                                                                                                                 |
| N | Q1AWG4 | DR | metal ion binding                                                                                                                                                                                                                                                                                                                         |
| N | Q1AWG4 | DR | threonine-tRNA ligase activity                                                                                                                                                                                                                                                                                                            |

|   |        |    |                                                                                                                                                                                                                                   |
|---|--------|----|-----------------------------------------------------------------------------------------------------------------------------------------------------------------------------------------------------------------------------------|
| N | Q1AWG4 | DR | threonyl-tRNA aminoacylation                                                                                                                                                                                                      |
| N | Q1AYN2 | DE | Protein CrcB homolog 1;                                                                                                                                                                                                           |
| N | Q1BD76 | CC | EXHIBITS S-adenosyl-L-methionine-dependent methyltransferase activity (By similarity)                                                                                                                                             |
| N | Q1BD76 | DE | Putative S-adenosyl-L-methionine-dependent methyltransferase Mmcs_1044;                                                                                                                                                           |
| N | Q1BD76 | DR | methyltransferase activity                                                                                                                                                                                                        |
| N | Q1BNL1 | CC | NO SPECIFIC FUNCTION HAS SO FAR BEEN ATTRIBUTED TO THIS INITIATION FACTOR; HOWEVER, IT SEEMS TO STIMULATE MORE OR LESS ALL THE ACTIVITIES OF THE OTHER TWO INITIATION FACTORS, IF-1 AND IF-2                                      |
| N | Q1BNL1 | DE | Translation initiation factor IF-1 2;                                                                                                                                                                                             |
| N | Q1BNL1 | DR | translation initiation factor activity                                                                                                                                                                                            |
| N | Q1BWA2 | CC | may catalyze the methylation of C-1 in cobalt-precorrin-5 and the subsequent extrusion of acetic acid from the resulting intermediate to form cobalt-precorrin-6A                                                                 |
| N | Q1BWA2 | DE | Putative cobalt-precorrin-6A synthase [deacetylating];                                                                                                                                                                            |
| N | Q1BWA2 | DR | cobalamin biosynthetic process                                                                                                                                                                                                    |
| N | Q1BWA2 | DR | transferase activity                                                                                                                                                                                                              |
| N | Q1BWM2 | CC | Functions in the N-end rule pathway of protein degradation where it conjugates Leu, Phe and, less efficiently, Met from aminoacyl-tRNAs to the N-termini of proteins containing an N-terminal arginine or lysine (By similarity). |
| N | Q1BWM2 | DE | L/F-transferase;                                                                                                                                                                                                                  |
| N | Q1BWM2 | DE | Leucyl/phenylalanyl-tRNA--protein transferase;                                                                                                                                                                                    |
| N | Q1BWM2 | DE | Leucyltransferase;                                                                                                                                                                                                                |
| N | Q1BWM2 | DE | Phenylalanyltransferase;                                                                                                                                                                                                          |
| N | Q1BWM2 | DR | acyltransferase activity                                                                                                                                                                                                          |
| N | Q1BWM2 | DR | leucyltransferase activity                                                                                                                                                                                                        |
| N | Q1BWM2 | DR | protein catabolic process                                                                                                                                                                                                         |
| N | Q1BY04 | DE | 30S ribosomal protein S16;                                                                                                                                                                                                        |
| N | Q1BY04 | DR | structural constituent of ribosome                                                                                                                                                                                                |
| N | Q1BY28 | DE | 3-phosphoshikimate 1-carboxyvinyltransferase;                                                                                                                                                                                     |
| N | Q1BY28 | DE | 5-enolpyruvylshikimate-3-phosphate synthase;                                                                                                                                                                                      |
| N | Q1BY28 | DE | EPSP synthase;                                                                                                                                                                                                                    |
| N | Q1BY28 | DR | 3-phosphoshikimate 1-carboxyvinyltransferase activity                                                                                                                                                                             |
| N | Q1BY28 | DR | aromatic amino acid family biosynthetic process                                                                                                                                                                                   |
| N | Q1C475 | CC | Nucleotidase with a broad substrate specificity as it can dephosphorylate various ribo- and deoxyribonucleoside 5'- monophosphates and ribonucleoside 3'- monophosphates with highest affinity to 3'-AMP                          |
| N | Q1C475 | CC | Also hydrolyzes polyphosphate (exopolyphosphatase activity) with the preference for short-chain- length substrates (P20-25)                                                                                                       |
| N | Q1C475 | CC | Might be involved in the regulation of dNTP and NTP pools, and in the turnover of 3'-mononucleotides produced by numerous intracellular RNases (T1, T2, and F) during the degradation of various RNAs (By similarity).            |
| N | Q1C475 | DE | 5'/3'-nucleotidase;                                                                                                                                                                                                               |
| N | Q1C475 | DE | Exopolyphosphatase;                                                                                                                                                                                                               |
| N | Q1C475 | DE | Multifunctional protein surE;                                                                                                                                                                                                     |
| N | Q1C475 | DE | Nucleoside monophosphate phosphohydrolase;                                                                                                                                                                                        |
| N | Q1C475 | DR | 3'-nucleotidase activity                                                                                                                                                                                                          |
| N | Q1C475 | DR | 5'-nucleotidase activity                                                                                                                                                                                                          |
| N | Q1C475 | DR | exopolyphosphatase activity                                                                                                                                                                                                       |
| N | Q1C475 | DR | metal ion binding                                                                                                                                                                                                                 |
| N | Q1C475 | DR | nucleotide binding                                                                                                                                                                                                                |
| N | Q1C479 | CC | Required for the cell division process (By similarity).                                                                                                                                                                           |
| N | Q1C479 | DE | Cell division protein ftsB homolog;                                                                                                                                                                                               |
| N | Q1C479 | DR | cell division                                                                                                                                                                                                                     |
| N | Q1C5J6 | CC | Catalyzes the synthesis of GMP from XMP (By similarity).                                                                                                                                                                          |
| N | Q1C5J6 | DE | GMP synthase [glutamine-hydrolyzing];                                                                                                                                                                                             |
| N | Q1C5J6 | DE | GMP synthetase;                                                                                                                                                                                                                   |
| N | Q1C5J6 | DE | Glutamine amidotransferase;                                                                                                                                                                                                       |
| N | Q1C5J6 | DR | GMP biosynthetic process                                                                                                                                                                                                          |
| N | Q1C5J6 | DR | GMP synthase (glutamine-hydrolyzing) activity                                                                                                                                                                                     |
| N | Q1C5J6 | DR | glutamine metabolic process                                                                                                                                                                                                       |
| N | Q1C7J3 | CC | Catalyzes the conversion of L-arabinose to L-ribulose (By similarity).                                                                                                                                                            |
| N | Q1C7J3 | DE | L-arabinose isomerase;                                                                                                                                                                                                            |
| N | Q1C7J3 | DR | L-arabinose isomerase activity                                                                                                                                                                                                    |
| N | Q1C7J3 | DR | L-fucose isomerase activity                                                                                                                                                                                                       |
| N | Q1C7J3 | DR | arabinose catabolic process                                                                                                                                                                                                       |
| N | Q1C7J3 | DR | fucose metabolic process                                                                                                                                                                                                          |
| N | Q1C7J3 | DR | metal ion binding                                                                                                                                                                                                                 |

|   |        |    |                                                                                                                                                                                                                                          |
|---|--------|----|------------------------------------------------------------------------------------------------------------------------------------------------------------------------------------------------------------------------------------------|
| N | Q1C8A7 | CC | Transforms N(2)-succinylglutamate into succinate and glutamate.                                                                                                                                                                          |
| N | Q1C8A7 | DE | Succinylglutamate desuccinylase;                                                                                                                                                                                                         |
| N | Q1C8A7 | DR | arginine catabolic process to glutamate                                                                                                                                                                                                  |
| N | Q1C8A7 | DR | hydrolase activity, acting on ester bonds                                                                                                                                                                                                |
| N | Q1C8A7 | DR | succinylglutamate desuccinylase activity                                                                                                                                                                                                 |
| N | Q1C8A7 | DR | zinc ion binding                                                                                                                                                                                                                         |
| N | Q1C9V1 | CC | Part of the ABC transporter complex MglABC involved in galactose/methyl galactoside import                                                                                                                                               |
| N | Q1C9V1 | CC | Responsible for energy coupling to the transport system (By similarity).                                                                                                                                                                 |
| N | Q1C9V1 | DE | Galactose/methyl galactoside import ATP-binding protein MglA;                                                                                                                                                                            |
| N | Q1C9V1 | DR | monosaccharide-transporting ATPase activity                                                                                                                                                                                              |
| N | Q1CEC9 | CC | Involved in resistance toward heavy metals (By similarity).                                                                                                                                                                              |
| N | Q1CEC9 | DE | Divalent-cation tolerance protein CutA;                                                                                                                                                                                                  |
| N | Q1CEC9 | DR | metal ion binding                                                                                                                                                                                                                        |
| N | Q1CEC9 | DR | response to metal ion                                                                                                                                                                                                                    |
| N | Q1CFE4 | CC | Modifies, by uridylylation or deuridylylation the PII (glnB) regulatory protein (By similarity).                                                                                                                                         |
| N | Q1CFE4 | DE | PII uridylyl-transferase;                                                                                                                                                                                                                |
| N | Q1CFE4 | DE | Uridylyl-removing enzyme;                                                                                                                                                                                                                |
| N | Q1CFE4 | DE | [Protein-PII] uridylyltransferase;                                                                                                                                                                                                       |
| N | Q1CFE4 | DR | [protein-PII] uridylyltransferase activity                                                                                                                                                                                               |
| N | Q1CFE4 | DR | amino acid binding                                                                                                                                                                                                                       |
| N | Q1CFE4 | DR | nitrogen compound metabolic process                                                                                                                                                                                                      |
| N | Q1CGL5 | DE | UPF0319 protein YPN_2537;                                                                                                                                                                                                                |
| N | Q1CHR3 | CC | NDH-1 shuttles electrons from NADH, via FMN and iron- sulfur (Fe-S) centers, to quinones in the respiratory chain                                                                                                                        |
| N | Q1CHR3 | CC | Couples the redox reaction to proton translocation (for every two electrons transferred, four hydrogen ions are translocated across the cytoplasmic membrane), and thus conserves the redox energy in a proton gradient (By similarity). |
| N | Q1CHR3 | CC | The immediate electron acceptor for the enzyme in this species is believed to be ubiquinone                                                                                                                                              |
| N | Q1CHR3 | DE | NADH dehydrogenase I subunit N;                                                                                                                                                                                                          |
| N | Q1CHR3 | DE | NADH-quinone oxidoreductase subunit N;                                                                                                                                                                                                   |
| N | Q1CHR3 | DE | NDH-1 subunit N;                                                                                                                                                                                                                         |
| N | Q1CHR3 | DR | ATP synthesis coupled electron transport                                                                                                                                                                                                 |
| N | Q1CHR3 | DR | NADH dehydrogenase (ubiquinone) activity                                                                                                                                                                                                 |
| N | Q1CHR3 | DR | quinone binding                                                                                                                                                                                                                          |
| N | Q1CN19 | CC | Could be involved in the degradation of phospho-AI-2 (By similarity).                                                                                                                                                                    |
| N | Q1CN19 | DE | Uncharacterized aldolase IsrF;                                                                                                                                                                                                           |
| N | Q1CN19 | DR | lyase activity                                                                                                                                                                                                                           |
| N | Q1CN78 | CC | DNA-dependent RNA polymerase catalyzes the transcription of DNA into RNA using the four ribonucleoside triphosphates as substrates.                                                                                                      |
| N | Q1CN78 | DE | DNA-directed RNA polymerase subunit beta;                                                                                                                                                                                                |
| N | Q1CN78 | DE | RNA polymerase subunit beta;                                                                                                                                                                                                             |
| N | Q1CN78 | DE | RNAP subunit beta;                                                                                                                                                                                                                       |
| N | Q1CN78 | DE | Transcriptase subunit beta;                                                                                                                                                                                                              |
| N | Q1CN78 | DR | DNA-directed RNA polymerase activity                                                                                                                                                                                                     |
| N | Q1CN78 | DR | ribonucleoside binding                                                                                                                                                                                                                   |
| N | Q1CZH6 | DE | Anthranilate phosphoribosyltransferase;                                                                                                                                                                                                  |
| N | Q1CZH6 | DR | anthranilate phosphoribosyltransferase activity                                                                                                                                                                                          |
| N | Q1CZH6 | DR | tryptophan biosynthetic process                                                                                                                                                                                                          |
| N | Q1D375 | CC | Involved in rRNA and/or ribosome maturation and assembly                                                                                                                                                                                 |
| N | Q1D375 | CC | May have metal-dependent hydrolase activity (By similarity).                                                                                                                                                                             |
| N | Q1D375 | CC | Required for normal 5' and 3' processing of 16S, 23S and 5S rRNAs                                                                                                                                                                        |
| N | Q1D375 | DE | Probable rRNA maturation factor;                                                                                                                                                                                                         |
| N | Q1D375 | DR | metal ion binding                                                                                                                                                                                                                        |
| N | Q1D375 | DR | metalloendopeptidase activity                                                                                                                                                                                                            |
| N | Q1D375 | DR | rRNA processing                                                                                                                                                                                                                          |
| N | Q1DI07 | CC | ATP-binding RNA helicase involved in transcription elongation and required for the export of mRNA out of the nucleus                                                                                                                     |
| N | Q1DI07 | CC | May be involved in rDNA and telomeric silencing, and maintenance of genome integrity (By similarity).                                                                                                                                    |
| N | Q1DI07 | CC | SUB2 plays also a role in pre-mRNA splicing and spliceosome assembly                                                                                                                                                                     |
| N | Q1DI07 | DE | ATP-dependent RNA helicase SUB2;                                                                                                                                                                                                         |
| N | Q1DI07 | DR | ATP-dependent helicase activity                                                                                                                                                                                                          |

|   |        |    |                                                                                                                                                                                                |
|---|--------|----|------------------------------------------------------------------------------------------------------------------------------------------------------------------------------------------------|
| N | Q1DI07 | DR | mRNA processing                                                                                                                                                                                |
| N | Q1DI07 | DR | mRNA transport                                                                                                                                                                                 |
| N | Q1DTG2 | CC | Variant histone H2A which can replace H2A in some nucleosomes                                                                                                                                  |
| N | Q1DTG2 | CC | DNA accessibility is regulated via a complex set of post-translational modifications of histones, also called histone code, and nucleosome remodeling                                          |
| N | Q1DTG2 | CC | Histones thereby play a central role in transcription regulation, DNA repair, DNA replication and chromosomal stability                                                                        |
| N | Q1DTG2 | CC | Involved in chromosome stability (By similarity).                                                                                                                                              |
| N | Q1DTG2 | CC | Near telomeres, it may counteract gene silencing caused by the spread of heterochromatin proteins                                                                                              |
| N | Q1DTG2 | CC | Nucleosomes wrap and compact DNA into chromatin, limiting DNA accessibility to the cellular machineries which require DNA as a template                                                        |
| N | Q1DTG2 | CC | Required for the RNA polymerase II and SP113/157 recruitment to the target genes                                                                                                               |
| N | Q1DTG2 | CC | This variant is enriched at promoters, it may keep them in a repressed state until the appropriate activation signal is received                                                               |
| N | Q1DTG2 | DE | Histone H2A.Z;                                                                                                                                                                                 |
| N | Q1DTG2 | DR | nucleosome assembly                                                                                                                                                                            |
| N | Q1G948 | DE | UPF0297 protein Ldb1606;                                                                                                                                                                       |
| N | Q1G9L4 | CC | Specifically methylates guanosine-37 in various tRNAs (By similarity).                                                                                                                         |
| N | Q1G9L4 | DE | M1G-methyltransferase;                                                                                                                                                                         |
| N | Q1G9L4 | DE | tRNA (guanine-N(1)-)-methyltransferase;                                                                                                                                                        |
| N | Q1G9L4 | DE | tRNA [GM37] methyltransferase;                                                                                                                                                                 |
| N | Q1G9L4 | DR | tRNA (guanine-N1-)-methyltransferase activity                                                                                                                                                  |
| N | Q1G9L7 | CC | This protein is located at the 50S-50S ribosomal subunit interface and may play a role in the structure and function of the aminoacyl-tRNA binding site (By similarity)                        |
| N | Q1G9L7 | DE | 50S ribosomal protein L19;                                                                                                                                                                     |
| N | Q1G9L7 | DR | structural constituent of ribosome                                                                                                                                                             |
| N | Q1GAQ4 | CC | Binds directly to 16S ribosomal RNA (By similarity).                                                                                                                                           |
| N | Q1GAQ4 | DE | 30S ribosomal protein S20;                                                                                                                                                                     |
| N | Q1GAQ4 | DR | structural constituent of ribosome                                                                                                                                                             |
| N | Q1GBK5 | CC | Binds 16S rRNA, required for the assembly of 50S particles and may also be responsible for determining the conformation of the 16S rRNA at the A site (By similarity)                          |
| N | Q1GBK5 | DE | 30S ribosomal protein S14 type Z;                                                                                                                                                              |
| N | Q1GBK5 | DR | metal ion binding                                                                                                                                                                              |
| N | Q1GBK5 | DR | structural constituent of ribosome                                                                                                                                                             |
| N | Q1GHL5 | DE | FGAM synthase II;                                                                                                                                                                              |
| N | Q1GHL5 | DE | Phosphoribosylformylglycinamidine synthase 2;                                                                                                                                                  |
| N | Q1GHL5 | DE | Phosphoribosylformylglycinamidine synthase II;                                                                                                                                                 |
| N | Q1GHL5 | DR | 'de novo' IMP biosynthetic process                                                                                                                                                             |
| N | Q1GHL5 | DR | phosphoribosylformylglycinamidine synthase activity                                                                                                                                            |
| N | Q1GIV5 | CC | Required for accurate and efficient protein synthesis under certain stress conditions                                                                                                          |
| N | Q1GIV5 | CC | Back- translocation proceeds from a post-translocation (POST) complex to a pre-translocation (PRE) complex, thus giving elongation factor G a second chance to translocate the tRNAs correctly |
| N | Q1GIV5 | CC | Binds to ribosomes in a GTP-dependent manner (By similarity).                                                                                                                                  |
| N | Q1GIV5 | CC | May act as a fidelity factor of the translation reaction, by catalyzing a one-codon backward translocation of tRNAs on improperly translocated ribosomes                                       |
| N | Q1GIV5 | DE | Elongation factor 4;                                                                                                                                                                           |
| N | Q1GIV5 | DE | Ribosomal back-translocase LepA;                                                                                                                                                               |
| N | Q1GIV5 | DR | GTPase activity                                                                                                                                                                                |
| N | Q1GPA3 | CC | Protein S19 forms a complex with S13 that binds strongly to the 16S ribosomal RNA (By similarity).                                                                                             |
| N | Q1GPA3 | DE | 30S ribosomal protein S19;                                                                                                                                                                     |
| N | Q1GPA3 | DR | structural constituent of ribosome                                                                                                                                                             |
| N | Q1GPB4 | CC | This protein binds to the 23S rRNA, and is important in its secondary structure                                                                                                                |
| N | Q1GPB4 | CC | It is located near the subunit interface in the base of the L7/L12 stalk, and near the tRNA binding site of the peptidyltransferase center (By similarity).                                    |
| N | Q1GPB4 | DE | 50S ribosomal protein L6;                                                                                                                                                                      |
| N | Q1GPB4 | DR | structural constituent of ribosome                                                                                                                                                             |
| N | Q1GRR0 | CC | Involved in saturated fatty acids biosynthesis.                                                                                                                                                |
| N | Q1GRR0 | DE | (3R)-hydroxymyristoyl ACP dehydrase;                                                                                                                                                           |
| N | Q1GRR0 | DE | (3R)-hydroxymyristoyl-[acyl-carrier-protein] dehydratase;                                                                                                                                      |
| N | Q1GRR0 | DR | fatty acid biosynthetic process                                                                                                                                                                |
| N | Q1GRR0 | DR | hydro-lyase activity                                                                                                                                                                           |
| N | Q1GRR0 | DR | lipid A biosynthetic process                                                                                                                                                                   |

|   |        |    |                                                                                                                                                                                                                                         |
|---|--------|----|-----------------------------------------------------------------------------------------------------------------------------------------------------------------------------------------------------------------------------------------|
| N | Q1GSP2 | CC | This is one of the proteins that binds to the 5S RNA in the ribosome where it forms part of the central protuberance (By similarity).                                                                                                   |
| N | Q1GSP2 | DE | 50S ribosomal protein L25;                                                                                                                                                                                                              |
| N | Q1GSP2 | DE | General stress protein CTC;                                                                                                                                                                                                             |
| N | Q1GSP2 | DR | 5S rRNA binding                                                                                                                                                                                                                         |
| N | Q1GSP2 | DR | structural constituent of ribosome                                                                                                                                                                                                      |
| N | Q1H042 | CC | involved in cell division; probably involved in intracellular septation (By similarity)                                                                                                                                                 |
| N | Q1H042 | DE | Probable intracellular septation protein;                                                                                                                                                                                               |
| N | Q1H042 | DR | barrier septum formation                                                                                                                                                                                                                |
| N | Q1H1K6 | DE | UPF0059 membrane protein Mfla_1363;                                                                                                                                                                                                     |
| N | Q1H1T1 | DE | 50S ribosomal protein L36 2;                                                                                                                                                                                                            |
| N | Q1H1T1 | DR | structural constituent of ribosome                                                                                                                                                                                                      |
| N | Q1H4X6 | DE | Protein smg homolog;                                                                                                                                                                                                                    |
| N | Q1HK80 | CC | Core subunit of the mitochondrial membrane respiratory chain NADH dehydrogenase (Complex I) that is believed to belong to the minimal assembly                                                                                          |
| N | Q1HK80 | CC | Complex I participates in the transfer of electrons from NADH to the respiratory chain                                                                                                                                                  |
| N | Q1HK80 | CC | The immediate electron acceptor for the enzyme is believed to be ubiquinone (By similarity).                                                                                                                                            |
| N | Q1HK80 | DE | NADH dehydrogenase subunit 5;                                                                                                                                                                                                           |
| N | Q1HK80 | DE | NADH-ubiquinone oxidoreductase chain 5;                                                                                                                                                                                                 |
| N | Q1HK80 | DR | ATP synthesis coupled electron transport                                                                                                                                                                                                |
| N | Q1HK80 | DR | NADH dehydrogenase (ubiquinone) activity                                                                                                                                                                                                |
| N | Q1I2I2 | CC | F(1)F(0) ATP synthase produces ATP from ADP in the presence of a proton or sodium gradient                                                                                                                                              |
| N | Q1I2I2 | CC | During catalysis, ATP synthesis in the catalytic domain of F(1) is coupled via a rotary mechanism of the central stalk subunits to proton translocation (By similarity)                                                                 |
| N | Q1I2I2 | CC | F-type ATPases consist of two structural domains, F(1) containing the extramembraneous catalytic core and F(0) containing the membrane proton channel, linked together by a central stalk and a peripheral stalk                        |
| N | Q1I2I2 | DE | ATP synthase F(0) sector subunit c;                                                                                                                                                                                                     |
| N | Q1I2I2 | DE | ATP synthase subunit c;                                                                                                                                                                                                                 |
| N | Q1I2I2 | DE | F-ATPase subunit c;                                                                                                                                                                                                                     |
| N | Q1I2I2 | DE | F-type ATPase subunit c;                                                                                                                                                                                                                |
| N | Q1I2I2 | DE | Lipid-binding protein;                                                                                                                                                                                                                  |
| N | Q1I2I2 | DR | ATP hydrolysis coupled proton transport                                                                                                                                                                                                 |
| N | Q1I2I2 | DR | ATP synthesis coupled proton transport                                                                                                                                                                                                  |
| N | Q1I2I2 | DR | hydrogen ion transmembrane transporter activity                                                                                                                                                                                         |
| N | Q1I2I2 | DR | lipid binding                                                                                                                                                                                                                           |
| N | Q1I2I4 | CC | F(1)F(0) ATP synthase produces ATP from ADP in the presence of a proton or sodium gradient                                                                                                                                              |
| N | Q1I2I4 | CC | During catalysis, ATP synthesis in the catalytic domain of F(1) is coupled via a rotary mechanism of the central stalk subunits to proton translocation (By similarity)                                                                 |
| N | Q1I2I4 | CC | F-type ATPases consist of two structural domains, F(1) containing the extramembraneous catalytic core and F(0) containing the membrane proton channel, linked together by a central stalk and a peripheral stalk                        |
| N | Q1I2I4 | DE | ATP synthase F(1) sector subunit delta;                                                                                                                                                                                                 |
| N | Q1I2I4 | DE | ATP synthase subunit delta;                                                                                                                                                                                                             |
| N | Q1I2I4 | DE | F-ATPase subunit delta;                                                                                                                                                                                                                 |
| N | Q1I2I4 | DE | F-type ATPase subunit delta;                                                                                                                                                                                                            |
| N | Q1I2I4 | DR | ATP synthesis coupled proton transport                                                                                                                                                                                                  |
| N | Q1I2I4 | DR | hydrogen ion transporting ATP synthase activity, rotational mechanism                                                                                                                                                                   |
| N | Q1I7P1 | CC | One of the components of the high-affinity ATP-driven potassium transport (or KDP) system, which catalyzes the hydrolysis of ATP coupled with the exchange of hydrogen and potassium ions                                               |
| N | Q1I7P1 | CC | The C subunit may be involved in assembly of the KDP complex (By similarity).                                                                                                                                                           |
| N | Q1I7P1 | DE | ATP phosphohydrolase [potassium-transporting] C chain;                                                                                                                                                                                  |
| N | Q1I7P1 | DE | Potassium-binding and translocating subunit C;                                                                                                                                                                                          |
| N | Q1I7P1 | DE | Potassium-translocating ATPase C chain;                                                                                                                                                                                                 |
| N | Q1I7P1 | DE | Potassium-transporting ATPase C chain;                                                                                                                                                                                                  |
| N | Q1I7P1 | DR | potassium-transporting ATPase activity                                                                                                                                                                                                  |
| N | Q1I7Z8 | CC | NDH-1 shuttles electrons from NADH, via FMN and iron- sulfur (Fe-S) centers, to quinones in the respiratory chain                                                                                                                       |
| N | Q1I7Z8 | CC | Couples the redox reaction to proton translocation (for every two electrons transferred, four hydrogen ions are translocated across the cytoplasmic membrane), and thus conserves the redox energy in a proton gradient (By similarity) |

|   |        |    |                                                                                                                                                                                                                                         |
|---|--------|----|-----------------------------------------------------------------------------------------------------------------------------------------------------------------------------------------------------------------------------------------|
| N | Q1I7Z8 | CC | The immediate electron acceptor for the enzyme in this species is believed to be ubiquinone                                                                                                                                             |
| N | Q1I7Z8 | DE | NADH dehydrogenase I subunit C/D;                                                                                                                                                                                                       |
| N | Q1I7Z8 | DE | NADH-quinone oxidoreductase subunit C/D;                                                                                                                                                                                                |
| N | Q1I7Z8 | DE | NDH-1 subunit C/D;                                                                                                                                                                                                                      |
| N | Q1I7Z8 | DR | NADH dehydrogenase (ubiquinone) activity                                                                                                                                                                                                |
| N | Q1I7Z8 | DR | oxidation-reduction process                                                                                                                                                                                                             |
| N | Q1I7Z8 | DR | quinone binding                                                                                                                                                                                                                         |
| N | Q1IC11 | DE | Phenylalanine--tRNA ligase alpha chain;                                                                                                                                                                                                 |
| N | Q1IC11 | DE | Phenylalanyl-tRNA synthetase alpha chain;                                                                                                                                                                                               |
| N | Q1IC11 | DR | metal ion binding                                                                                                                                                                                                                       |
| N | Q1IC11 | DR | phenylalanine-tRNA ligase activity                                                                                                                                                                                                      |
| N | Q1IC11 | DR | phenylalanyl-tRNA aminoacylation                                                                                                                                                                                                        |
| N | Q1IDA4 | CC | Catalyzes the interconversion of methylthioribose-1- phosphate (MTR-1-P) into methylthioribulose-1-phosphate (MTRu-1-P) (By similarity).                                                                                                |
| N | Q1IDA4 | DE | MTR-1-P isomerase;                                                                                                                                                                                                                      |
| N | Q1IDA4 | DE | Methylthioribose-1-phosphate isomerase;                                                                                                                                                                                                 |
| N | Q1IDA4 | DE | S-methyl-5-thioribose-1-phosphate isomerase;                                                                                                                                                                                            |
| N | Q1IDA4 | DR | S-methyl-5-thioribose-1-phosphate isomerase activity                                                                                                                                                                                    |
| N | Q1IDA4 | DR | methionine biosynthetic process                                                                                                                                                                                                         |
| N | Q1IHW2 | CC | The natural substrate for this enzyme may be peptidyl- tRNAs which drop off the ribosome during protein synthesis (By similarity).                                                                                                      |
| N | Q1IHW2 | DE | Peptidyl-tRNA hydrolase;                                                                                                                                                                                                                |
| N | Q1IHW2 | DR | aminoacyl-tRNA hydrolase activity                                                                                                                                                                                                       |
| N | Q1IL91 | CC | NDH-1 shuttles electrons from NADH, via FMN and iron- sulfur (Fe-S) centers, to quinones in the respiratory chain                                                                                                                       |
| N | Q1IL91 | CC | Couples the redox reaction to proton translocation (for every two electrons transferred, four hydrogen ions are translocated across the cytoplasmic membrane), and thus conserves the redox energy in a proton gradient (By similarity) |
| N | Q1IL91 | CC | The immediate electron acceptor for the enzyme in this species is believed to be ubiquinone                                                                                                                                             |
| N | Q1IL91 | DE | NADH dehydrogenase I subunit B 2;                                                                                                                                                                                                       |
| N | Q1IL91 | DE | NADH-quinone oxidoreductase subunit B 2;                                                                                                                                                                                                |
| N | Q1IL91 | DE | NDH-1 subunit B 2;                                                                                                                                                                                                                      |
| N | Q1IL91 | DR | 4 iron, 4 sulfur cluster binding                                                                                                                                                                                                        |
| N | Q1IL91 | DR | NADH dehydrogenase (ubiquinone) activity                                                                                                                                                                                                |
| N | Q1IL91 | DR | metal ion binding                                                                                                                                                                                                                       |
| N | Q1IL91 | DR | oxidation-reduction process                                                                                                                                                                                                             |
| N | Q1IL91 | DR | quinone binding                                                                                                                                                                                                                         |
| N | Q1J7K5 | DE | Asparagine--tRNA ligase;                                                                                                                                                                                                                |
| N | Q1J7K5 | DE | Asparaginyl-tRNA synthetase;                                                                                                                                                                                                            |
| N | Q1J7K5 | DR | asparagine-tRNA ligase activity                                                                                                                                                                                                         |
| N | Q1J7K5 | DR | asparaginyl-tRNA aminoacylation                                                                                                                                                                                                         |
| N | Q1J7K5 | DR | aspartate-tRNA ligase activity                                                                                                                                                                                                          |
| N | Q1J7K5 | DR | aspartyl-tRNA aminoacylation                                                                                                                                                                                                            |
| N | Q1J7K5 | DR | nucleic acid binding                                                                                                                                                                                                                    |
| N | Q1J7Q5 | CC | Transfers the N-acyl diglyceride group on what will become the N-terminal cysteine of membrane lipoproteins (By similarity).                                                                                                            |
| N | Q1J7Q5 | DE | Prolipoprotein diacylglyceryl transferase;                                                                                                                                                                                              |
| N | Q1J7Q5 | DR | lipoprotein biosynthetic process                                                                                                                                                                                                        |
| N | Q1J7Q5 | DR | protein lipoylation                                                                                                                                                                                                                     |
| N | Q1J7Q5 | DR | transferase activity, transferring glycosyl groups                                                                                                                                                                                      |
| N | Q1JAI0 | CC | Endonuclease that resolves Holliday junction intermediates in genetic recombination                                                                                                                                                     |
| N | Q1JAI0 | CC | Creates non-crossover four-strand junctions by introducing symmetrical nicks in paired strands                                                                                                                                          |
| N | Q1JAI0 | CC | Promotes annealing of linear ssDNA with homologous dsDNA                                                                                                                                                                                |
| N | Q1JAI0 | CC | Required for DNA repair, homologous recombination and chromosome segregation (By similarity).                                                                                                                                           |
| N | Q1JAI0 | DE | Holliday junction resolvase recU;                                                                                                                                                                                                       |
| N | Q1JAI0 | DE | Recombination protein U homolog;                                                                                                                                                                                                        |
| N | Q1JAI0 | DR | DNA recombination                                                                                                                                                                                                                       |
| N | Q1JAI0 | DR | endonuclease activity                                                                                                                                                                                                                   |
| N | Q1JAI0 | DR | metal ion binding                                                                                                                                                                                                                       |
| N | Q1JAR2 | DE | Arginine deiminase;                                                                                                                                                                                                                     |
| N | Q1JAR2 | DE | Arginine dihydrolase;                                                                                                                                                                                                                   |
| N | Q1JAR2 | DR | arginine catabolic process                                                                                                                                                                                                              |

|   |        |    |                                                                                                                                                                                                                                                           |
|---|--------|----|-----------------------------------------------------------------------------------------------------------------------------------------------------------------------------------------------------------------------------------------------------------|
| N | Q1JAR2 | DR | arginine deiminase activity                                                                                                                                                                                                                               |
| N | Q1JFE2 | CC | Component of the acetyl coenzyme A carboxylase (ACC) complex                                                                                                                                                                                              |
| N | Q1JFE2 | CC | Biotin carboxylase (BC) catalyzes the carboxylation of biotin on its carrier protein (BCCP) and then the CO(2) group is transferred by the transcarboxylase to acetyl-CoA to form malonyl- CoA (By similarity).                                           |
| N | Q1JFE2 | DE | ACCase subunit beta;                                                                                                                                                                                                                                      |
| N | Q1JFE2 | DE | Acetyl-CoA carboxylase carboxyltransferase subunit beta;                                                                                                                                                                                                  |
| N | Q1JFE2 | DE | Acetyl-coenzyme A carboxylase carboxyl transferase subunit beta;                                                                                                                                                                                          |
| N | Q1JFE2 | DR | acetyl-CoA carboxylase activity                                                                                                                                                                                                                           |
| N | Q1JFE2 | DR | fatty acid biosynthetic process                                                                                                                                                                                                                           |
| N | Q1JFE2 | DR | metal ion binding                                                                                                                                                                                                                                         |
| N | Q1JH90 | CC | Catalyzes the transfer of a dimethylallyl group onto the adenine at position 37 in tRNAs that read codons beginning with uridine, leading to the formation of N6-(dimethylallyl)adenosine (i(6)A) (By similarity).                                        |
| N | Q1JH90 | DE | DMAPP:tRNA dimethylallyltransferase;                                                                                                                                                                                                                      |
| N | Q1JH90 | DE | Dimethylallyl diphosphate:tRNA dimethylallyltransferase;                                                                                                                                                                                                  |
| N | Q1JH90 | DE | IPP transferase;                                                                                                                                                                                                                                          |
| N | Q1JH90 | DE | Isopentenyl-diphosphate:tRNA isopentenyltransferase;                                                                                                                                                                                                      |
| N | Q1JH90 | DE | tRNA dimethylallyltransferase;                                                                                                                                                                                                                            |
| N | Q1JH90 | DR | tRNA dimethylallyltransferase activity                                                                                                                                                                                                                    |
| N | Q1JH90 | DR | tRNA processing                                                                                                                                                                                                                                           |
| N | Q1JNZ9 | DE | 50S ribosomal protein L30;                                                                                                                                                                                                                                |
| N | Q1JNZ9 | DR | structural constituent of ribosome                                                                                                                                                                                                                        |
| N | Q1JP18 | CC | Involved in the binding of tRNA to the ribosomes (By similarity).                                                                                                                                                                                         |
| N | Q1JP18 | DE | 30S ribosomal protein S10;                                                                                                                                                                                                                                |
| N | Q1JP18 | DR | structural constituent of ribosome                                                                                                                                                                                                                        |
| N | Q1KVT9 | CC | Binds 16S rRNA, required for the assembly of 30S particles (By similarity).                                                                                                                                                                               |
| N | Q1KVT9 | DE | 30S ribosomal protein S14, chloroplastic;                                                                                                                                                                                                                 |
| N | Q1KVT9 | DR | structural constituent of ribosome                                                                                                                                                                                                                        |
| N | Q1KXQ4 | CC | Apoprotein for the two 4Fe-4S centers FA and FB of photosystem I (PSI); essential for photochemical activity                                                                                                                                              |
| N | Q1KXQ4 | CC | FB is the terminal electron acceptor of PSI, donating electrons to ferredoxin                                                                                                                                                                             |
| N | Q1KXQ4 | CC | PSI is a plastocyanin-ferredoxin oxidoreductase, converting photonic excitation into a charge separation, which transfers an electron from the donor P700 chlorophyll pair to the spectroscopically characterized acceptors A0, A1, FX, FA and FB in turn |
| N | Q1KXQ4 | CC | Required for binding of psaD and psaE to PSI                                                                                                                                                                                                              |
| N | Q1KXQ4 | CC | The C-terminus interacts with psaA/B/D and helps assemble the protein into the PSI complex                                                                                                                                                                |
| N | Q1KXQ4 | DE | 9 kDa polypeptide;                                                                                                                                                                                                                                        |
| N | Q1KXQ4 | DE | Photosystem I iron-sulfur center;                                                                                                                                                                                                                         |
| N | Q1KXQ4 | DE | Photosystem I subunit VII;                                                                                                                                                                                                                                |
| N | Q1KXQ4 | DR | 4 iron, 4 sulfur cluster binding                                                                                                                                                                                                                          |
| N | Q1KXQ4 | DR | electron carrier activity                                                                                                                                                                                                                                 |
| N | Q1KXQ4 | DR | metal ion binding                                                                                                                                                                                                                                         |
| N | Q1KXQ4 | DR | photosynthetic electron transport in photosystem I                                                                                                                                                                                                        |
| N | Q1L8D2 | DE | Glycoprotein endo-alpha-1,2-mannosidase-like protein;                                                                                                                                                                                                     |
| N | Q1L8D2 | DR | hydrolase activity                                                                                                                                                                                                                                        |
| N | Q1L8F9 | DE | UPF0536 protein C12orf66 homolog;                                                                                                                                                                                                                         |
| N | Q1LKM2 | CC | Carrier of the growing fatty acid chain in fatty acid biosynthesis (By similarity).                                                                                                                                                                       |
| N | Q1LKM2 | DE | Acyl carrier protein;                                                                                                                                                                                                                                     |
| N | Q1LKM2 | DR | acyl carrier activity                                                                                                                                                                                                                                     |
| N | Q1LKM2 | DR | cofactor binding                                                                                                                                                                                                                                          |
| N | Q1LKM2 | DR | fatty acid biosynthetic process                                                                                                                                                                                                                           |
| N | Q1LKM2 | DR | phosphopantetheine binding                                                                                                                                                                                                                                |
| N | Q1LP27 | DE | Dihydroorotate dehydrogenase;                                                                                                                                                                                                                             |
| N | Q1LP27 | DE | Dihydroorotate oxidase;                                                                                                                                                                                                                                   |
| N | Q1LP27 | DR | 'de novo' pyrimidine base biosynthetic process                                                                                                                                                                                                            |
| N | Q1LP27 | DR | UMP biosynthetic process                                                                                                                                                                                                                                  |
| N | Q1LP27 | DR | dihydroorotate oxidase activity                                                                                                                                                                                                                           |
| N | Q1LP27 | DR | oxidation-reduction process                                                                                                                                                                                                                               |
| N | Q1LPG5 | CC | This protein is involved in the repair of mismatches in DNA                                                                                                                                                                                               |
| N | Q1LPG5 | CC | It is possible that it carries out the mismatch recognition step                                                                                                                                                                                          |
| N | Q1LPG5 | CC | This protein has a weak ATPase activity (By similarity).                                                                                                                                                                                                  |
| N | Q1LPG5 | DE | DNA mismatch repair protein mutS;                                                                                                                                                                                                                         |
| N | Q1LPG5 | DR | mismatch repair                                                                                                                                                                                                                                           |

|   |        |    |                                                                                                                                                                                                                                                                                                                                                                   |
|---|--------|----|-------------------------------------------------------------------------------------------------------------------------------------------------------------------------------------------------------------------------------------------------------------------------------------------------------------------------------------------------------------------|
| N | Q1LPG5 | DR | mismatched DNA binding                                                                                                                                                                                                                                                                                                                                            |
| N | Q1LQ15 | DE | D-fructose-1,6-bisphosphate 1-phosphohydrolase class 1 1;                                                                                                                                                                                                                                                                                                         |
| N | Q1LQ15 | DE | FBPase class 1 1;                                                                                                                                                                                                                                                                                                                                                 |
| N | Q1LQ15 | DE | Fructose-1,6-bisphosphatase class 1 1;                                                                                                                                                                                                                                                                                                                            |
| N | Q1LQ15 | DR | carbohydrate metabolic process                                                                                                                                                                                                                                                                                                                                    |
| N | Q1LQ15 | DR | fructose 1,6-bisphosphate 1-phosphatase activity                                                                                                                                                                                                                                                                                                                  |
| N | Q1LQ15 | DR | metal ion binding                                                                                                                                                                                                                                                                                                                                                 |
| N | Q1LSJ9 | CC | An essential GTPase which binds GTP, GDP and possibly (p)ppGpp with moderate affinity, with high nucleotide exchange rates and a fairly low GTP hydrolysis rate (By similarity)<br>it may play a role in control of the cell cycle, stress response, ribosome biogenesis and in those bacteria that undergo differentiation, in morphogenesis control (Potential) |
| N | Q1LSJ9 | CC |                                                                                                                                                                                                                                                                                                                                                                   |
| N | Q1LSJ9 | DE | GTP-binding protein obg;                                                                                                                                                                                                                                                                                                                                          |
| N | Q1LSJ9 | DR | GTPase activity                                                                                                                                                                                                                                                                                                                                                   |
| N | Q1LSJ9 | DR | magnesium ion binding                                                                                                                                                                                                                                                                                                                                             |
| N | Q1LT98 | CC | NDH-1 shuttles electrons from NADH, via FMN and iron- sulfur (Fe-S) centers, to quinones in the respiratory chain<br>Couple the redox reaction to proton translocation (for every two electrons transferred, four hydrogen ions are translocated across the cytoplasmic membrane), and thus conserves the redox energy in a proton gradient (By similarity)       |
| N | Q1LT98 | CC |                                                                                                                                                                                                                                                                                                                                                                   |
| N | Q1LT98 | CC | The immediate electron acceptor for the enzyme in this species is believed to be ubiquinone                                                                                                                                                                                                                                                                       |
| N | Q1LT98 | DE | NADH dehydrogenase I subunit K;                                                                                                                                                                                                                                                                                                                                   |
| N | Q1LT98 | DE | NADH-quinone oxidoreductase subunit K;                                                                                                                                                                                                                                                                                                                            |
| N | Q1LT98 | DE | NDH-1 subunit K;                                                                                                                                                                                                                                                                                                                                                  |
| N | Q1LT98 | DR | ATP synthesis coupled electron transport                                                                                                                                                                                                                                                                                                                          |
| N | Q1LT98 | DR | NADH dehydrogenase (quinone) activity                                                                                                                                                                                                                                                                                                                             |
| N | Q1LT98 | DR | quinone binding                                                                                                                                                                                                                                                                                                                                                   |
| N | Q1LTI6 | CC | Transfers the 4'-phosphopantetheine moiety from coenzyme A to a Ser of acyl-carrier-protein (By similarity).                                                                                                                                                                                                                                                      |
| N | Q1LTI6 | DE | 4'-phosphopantetheinyl transferase AcpS;                                                                                                                                                                                                                                                                                                                          |
| N | Q1LTI6 | DE | Holo-ACP synthase;                                                                                                                                                                                                                                                                                                                                                |
| N | Q1LTI6 | DE | Holo-[acyl-carrier-protein] synthase;                                                                                                                                                                                                                                                                                                                             |
| N | Q1LTI6 | DR | fatty acid biosynthetic process                                                                                                                                                                                                                                                                                                                                   |
| N | Q1LTI6 | DR | holo-[acyl-carrier-protein] synthase activity                                                                                                                                                                                                                                                                                                                     |
| N | Q1LTI6 | DR | macromolecule biosynthetic process                                                                                                                                                                                                                                                                                                                                |
| N | Q1LTI6 | DR | magnesium ion binding                                                                                                                                                                                                                                                                                                                                             |
| N | Q1LTK8 | DE | UPF0434 protein BCI_0256;                                                                                                                                                                                                                                                                                                                                         |
| N | Q1LTL2 | CC | Catalyzes the reversible conversion of 3- phosphohydroxypyruvate to phosphoserine and of 3-hydroxy-2-oxo-4- phosphonoxybutanoate to phosphohydroxythreonine (By similarity).                                                                                                                                                                                      |
| N | Q1LTL2 | DE | Phosphohydroxythreonine aminotransferase;                                                                                                                                                                                                                                                                                                                         |
| N | Q1LTL2 | DE | Phosphoserine aminotransferase;                                                                                                                                                                                                                                                                                                                                   |
| N | Q1LTL2 | DR | L-serine biosynthetic process                                                                                                                                                                                                                                                                                                                                     |
| N | Q1LTL2 | DR | O-phospho-L-serine:2-oxoglutarate aminotransferase activity                                                                                                                                                                                                                                                                                                       |
| N | Q1LTL2 | DR | pyridoxal phosphate binding                                                                                                                                                                                                                                                                                                                                       |
| N | Q1LTL2 | DR | pyridoxine biosynthetic process                                                                                                                                                                                                                                                                                                                                   |
| N | Q1LUD1 | DE | Transmembrane protein 168-A;                                                                                                                                                                                                                                                                                                                                      |
| N | Q1LWG3 | CC | Component of the large subunit of the mitochondrial ribosome (Potential).                                                                                                                                                                                                                                                                                         |
| N | Q1LWG3 | DE | 39S ribosomal protein L36, mitochondrial;                                                                                                                                                                                                                                                                                                                         |
| N | Q1LWG3 | DR | structural constituent of ribosome                                                                                                                                                                                                                                                                                                                                |
| N | Q1MAK5 | DE | 30S ribosomal protein S16;                                                                                                                                                                                                                                                                                                                                        |
| N | Q1MAK5 | DR | structural constituent of ribosome                                                                                                                                                                                                                                                                                                                                |
| N | Q1MCN6 | CC | Part of the ABC transporter complex UgpABCE involved in sn-glycerol-3-phosphate import                                                                                                                                                                                                                                                                            |
| N | Q1MCN6 | CC | Responsible for energy coupling to the transport system (By similarity).                                                                                                                                                                                                                                                                                          |
| N | Q1MCN6 | DE | sn-glycerol-3-phosphate import ATP-binding protein UgpC 1;                                                                                                                                                                                                                                                                                                        |
| N | Q1MCN6 | DR | glycerol-3-phosphate-transporting ATPase activity                                                                                                                                                                                                                                                                                                                 |
| N | Q1MH54 | DE | 30S ribosomal protein S2;                                                                                                                                                                                                                                                                                                                                         |
| N | Q1MH54 | DR | structural constituent of ribosome                                                                                                                                                                                                                                                                                                                                |
| N | Q1MPZ8 | CC | Catalyzes the oxidation of 5,10- methylenetetrahydrofolate to 5,10-methenyltetrahydrofolate and then the hydrolysis of 5,10-methenyltetrahydrofolate to 10- formyltetrahydrofolate (By similarity).                                                                                                                                                               |
| N | Q1MPZ8 | DE | Bifunctional protein FOLD;                                                                                                                                                                                                                                                                                                                                        |
| N | Q1MPZ8 | DE | Methenyltetrahydrofolate cyclohydrolase;                                                                                                                                                                                                                                                                                                                          |



|   |        |    |                                                                                                                                                                                                                                              |
|---|--------|----|----------------------------------------------------------------------------------------------------------------------------------------------------------------------------------------------------------------------------------------------|
| N | Q1MPZ8 | DE | Methylenetetrahydrofolate dehydrogenase;                                                                                                                                                                                                     |
| N | Q1MPZ8 | DR | folic acid-containing compound biosynthetic process                                                                                                                                                                                          |
| N | Q1MPZ8 | DR | histidine biosynthetic process                                                                                                                                                                                                               |
| N | Q1MPZ8 | DR | methylenetetrahydrofolate cyclohydrolase activity                                                                                                                                                                                            |
| N | Q1MPZ8 | DR | methionine biosynthetic process                                                                                                                                                                                                              |
| N | Q1MPZ8 | DR | methylenetetrahydrofolate dehydrogenase (NADP+) activity                                                                                                                                                                                     |
| N | Q1MPZ8 | DR | one-carbon metabolic process                                                                                                                                                                                                                 |
| N | Q1MPZ8 | DR | oxidation-reduction process                                                                                                                                                                                                                  |
| N | Q1MPZ8 | DR | purine nucleotide biosynthetic process                                                                                                                                                                                                       |
| N | Q1MTQ7 | CC | Probable plus-end-directed motor enzyme involved in cytoskeleton movements (By similarity).                                                                                                                                                  |
| N | Q1MTQ7 | DE | Kinesin-like motor protein C15D4.01c;                                                                                                                                                                                                        |
| N | Q1MTQ7 | DR | ATPase activity                                                                                                                                                                                                                              |
| N | Q1MTQ7 | DR | microtubule motor activity                                                                                                                                                                                                                   |
| N | Q1MTQ7 | DR | microtubule sliding                                                                                                                                                                                                                          |
| N | Q1MTQ7 | DR | mitotic anaphase B                                                                                                                                                                                                                           |
| N | Q1MTQ7 | DR | protein binding                                                                                                                                                                                                                              |
| N | Q1MTQ7 | DR | spindle elongation                                                                                                                                                                                                                           |
| N | Q1PEF6 | CC | Involved in ubiquitination and subsequent proteasomal degradation of target proteins                                                                                                                                                         |
| N | Q1PEF6 | CC | In the SCF complex, it serves as an adapter that links the F-box protein to CUL1 (By similarity).                                                                                                                                            |
| N | Q1PEF6 | CC | The functional specificity of this complex depends of the type of F- box protein                                                                                                                                                             |
| N | Q1PEF6 | CC | Together with CUL1, RBX1 and a F- box protein, it forms a SCF E3 ubiquitin ligase complex                                                                                                                                                    |
| N | Q1PEF6 | DE | SKP1-like protein 6;                                                                                                                                                                                                                         |
| N | Q1PEF6 | DR | ubiquitin-dependent protein catabolic process                                                                                                                                                                                                |
| N | Q1PFI4 | DE | F-box protein At1g60400;                                                                                                                                                                                                                     |
| N | Q1QL34 | CC | Allows the formation of correctly charged Asn-tRNA(Asn) or Gln-tRNA(Gln) through the transamidation of misacylated Asp- tRNA(Asn) or Glu-tRNA(Gln) in organisms which lack either or both of asparaginyl-tRNA or glutaminyl-tRNA synthetases |
| N | Q1QL34 | CC | The reaction takes place in the presence of glutamine and ATP through an activated phospho-Asp-tRNA(Asn) or phospho-Glu-tRNA(Gln) (By similarity).                                                                                           |
| N | Q1QL34 | DE | Asp/Glu-ADT subunit B;                                                                                                                                                                                                                       |
| N | Q1QL34 | DE | Aspartyl/glutamyl-tRNA(Asn/Gln) amidotransferase subunit B;                                                                                                                                                                                  |
| N | Q1QL34 | DR | carbon-nitrogen ligase activity, with glutamine as amido-N-donor                                                                                                                                                                             |
| N | Q1QN82 | DE | Phosphatidylserine decarboxylase alpha chain;                                                                                                                                                                                                |
| N | Q1QN82 | DE | Phosphatidylserine decarboxylase beta chain;                                                                                                                                                                                                 |
| N | Q1QN82 | DE | Phosphatidylserine decarboxylase proenzyme;                                                                                                                                                                                                  |
| N | Q1QN82 | DR | cofactor binding                                                                                                                                                                                                                             |
| N | Q1QN82 | DR | phosphatidylethanolamine biosynthetic process                                                                                                                                                                                                |
| N | Q1QN82 | DR | phosphatidylserine decarboxylase activity                                                                                                                                                                                                    |
| N | Q1QR47 | CC | Part of the ABC transporter complex CcmAB involved in the biogenesis of c-type cytochromes; once thought to export heme, this seems not to be the case, but its exact role is uncertain                                                      |
| N | Q1QR47 | CC | Responsible for energy coupling to the transport system (By similarity).                                                                                                                                                                     |
| N | Q1QR47 | DE | Cytochrome c biogenesis ATP-binding export protein CcmA;                                                                                                                                                                                     |
| N | Q1QR47 | DE | Heme exporter protein A;                                                                                                                                                                                                                     |
| N | Q1QR47 | DR | cytochrome complex assembly                                                                                                                                                                                                                  |
| N | Q1QR47 | DR | heme-transporting ATPase activity                                                                                                                                                                                                            |
| N | Q1QSZ3 | CC | One of the primary rRNA binding proteins, it binds directly to 16S rRNA where it helps nucleate assembly of the platform of the 30S subunit by binding and bridging several RNA helices of the 16S rRNA (By similarity).                     |
| N | Q1QSZ3 | DE | 30S ribosomal protein S15;                                                                                                                                                                                                                   |
| N | Q1QSZ3 | DR | structural constituent of ribosome                                                                                                                                                                                                           |
| N | Q1QX69 | CC | Involved in lipid A export and possibly also in glycerophospholipid export and for biogenesis of the outer membrane                                                                                                                          |
| N | Q1QX69 | CC | Transmembrane domains (TMD) form a pore in the inner membrane and the ATP-binding domain (NBD) is responsible for energy generation (By similarity).                                                                                         |
| N | Q1QX69 | DE | Lipid A export ATP-binding/permease protein MsbA;                                                                                                                                                                                            |
| N | Q1QX69 | DR | ATPase activity, coupled to transmembrane movement of substances                                                                                                                                                                             |
| N | Q1QX69 | DR | lipid transport                                                                                                                                                                                                                              |
| N | Q1R0G5 | CC | Binds to 23S rRNA                                                                                                                                                                                                                            |
| N | Q1R0G5 | CC | Forms part of two intersubunit bridges in the 70S ribosome (By similarity).                                                                                                                                                                  |
| N | Q1R0G5 | DE | 50S ribosomal protein L14;                                                                                                                                                                                                                   |
| N | Q1R0G5 | DR | structural constituent of ribosome                                                                                                                                                                                                           |

|   |        |    |                                                                                                                                                   |
|---|--------|----|---------------------------------------------------------------------------------------------------------------------------------------------------|
| N | Q1R420 | CC | Necessary for formate dehydrogenase activity (By similarity).                                                                                     |
| N | Q1R420 | DE | Protein FdhD;                                                                                                                                     |
| N | Q1R420 | DR | formate dehydrogenase (NAD <sup>+</sup> ) activity                                                                                                |
| N | Q1R7C6 | CC | The glycine cleavage system catalyzes the degradation of glycine (By similarity).                                                                 |
| N | Q1R7C6 | DE | Aminomethyltransferase;                                                                                                                           |
| N | Q1R7C6 | DE | Glycine cleavage system T protein;                                                                                                                |
| N | Q1R7C6 | DR | aminomethyltransferase activity                                                                                                                   |
| N | Q1R7C6 | DR | glycine catabolic process                                                                                                                         |
| N | Q1R7C6 | DR | transaminase activity                                                                                                                             |
| N | Q1R824 | CC | Probably involved in ribonucleotide reductase function (By similarity).                                                                           |
| N | Q1R824 | DE | Protein nrdI;                                                                                                                                     |
| N | Q1R8A9 | CC | Catalyzes the phosphorylation of NAD to NADP                                                                                                      |
| N | Q1R8A9 | CC | Utilizes ATP and other nucleoside triphosphates as well as inorganic polyphosphate as a source of phosphorus (By similarity).                     |
| N | Q1R8A9 | DE | Poly(P)/ATP NAD kinase;                                                                                                                           |
| N | Q1R8A9 | DE | Probable inorganic polyphosphate/ATP-NAD kinase;                                                                                                  |
| N | Q1R8A9 | DR | NAD <sup>+</sup> kinase activity                                                                                                                  |
| N | Q1R984 | CC | Involved in the removal of murein from the sacculus<br>may also facilitate integration of nascent murein strands into the sacculus by             |
| N | Q1R984 | CC | cleaving the peptide bonds between neighboring strands in mature murein (By similarity)                                                           |
| N | Q1R984 | DE | D-alanyl-D-alanine-endopeptidase;                                                                                                                 |
| N | Q1R984 | DE | DD-endopeptidase;                                                                                                                                 |
| N | Q1R984 | DE | Penicillin-insensitive murein endopeptidase;                                                                                                      |
| N | Q1R984 | DR | metal ion binding                                                                                                                                 |
| N | Q1R984 | DR | metallopeptidase activity                                                                                                                         |
| N | Q1R984 | DR | serine-type endopeptidase activity                                                                                                                |
| N | Q1RBN8 | DE | UPF0056 inner membrane protein marC;                                                                                                              |
| N | Q1REK9 | CC | Involved in base excision repair of DNA damaged by oxidation or by mutagenic agents                                                               |
| N | Q1REK9 | CC | Acts as DNA glycosylase that recognizes and removes damaged bases<br>cleaves the DNA backbone by beta-eta elimination to generate a single-strand |
| N | Q1REK9 | CC | break at the site of the removed base with both 3'- and 5'- phosphates (By                                                                        |
| N | Q1REK9 | CC | flap/AP <sup>1</sup> (apurinic/apyrimidinic) lyase activity and introduces nicks in the DNA strand                                                |
| N | Q1REK9 | CC | Has a preference for oxidized pyrimidines, such as thymine glycol, 5,6-dihydrouracil and 5,6-dihydrothymine                                       |
| N | Q1REK9 | DE | DNA glycosylase/AP lyase Nei;                                                                                                                     |
| N | Q1REK9 | DE | DNA-(apurinic or apyrimidinic site) lyase Nei;                                                                                                    |
| N | Q1REK9 | DE | Endonuclease 8;                                                                                                                                   |
| N | Q1REK9 | DE | Endonuclease VIII;                                                                                                                                |
| N | Q1REK9 | DR | DNA-(apurinic or apyrimidinic site) lyase activity                                                                                                |
| N | Q1REK9 | DR | base-excision repair                                                                                                                              |
| N | Q1REK9 | DR | damaged DNA binding                                                                                                                               |
| N | Q1REK9 | DR | hydrolase activity, hydrolyzing N-glycosyl compounds                                                                                              |
| N | Q1REK9 | DR | nucleotide-excision repair                                                                                                                        |
| N | Q1REK9 | DR | zinc ion binding                                                                                                                                  |
| N | Q1RG44 | CC | Probable regulatory factor involved in maltose metabolism (By similarity).                                                                        |
| N | Q1RG44 | DE | Sugar fermentation stimulation protein A;                                                                                                         |
| N | Q1RHG2 | DE | UPF0416 protein RBE_1121;                                                                                                                         |
| N | Q1RJD8 | DE | Thioredoxin reductase;                                                                                                                            |
| N | Q1RJD8 | DR | flavin adenine dinucleotide binding                                                                                                               |
| N | Q1RJD8 | DR | oxidation-reduction process                                                                                                                       |
| N | Q1RJD8 | DR | removal of superoxide radicals                                                                                                                    |
| N | Q1RJD8 | DR | thioredoxin-disulfide reductase activity                                                                                                          |
| N | Q1RMH4 | CC | General Rab protein regulator required for vesicle formation from the Golgi complex                                                               |
| N | Q1RMH4 | CC | In addition it inhibits the removal of Rab GTPases from the membrane by GDI1 (By similarity).                                                     |
| N | Q1RMH4 | CC | May control vesicle docking and fusion by mediating the action of Rab GTPases to the SNARE complexes                                              |
| N | Q1RMH4 | DE | PRA1 family protein 1;                                                                                                                            |
| N | Q1RMH4 | DE | Prenylated Rab acceptor protein 1;                                                                                                                |
| N | Q1WRR6 | CC | Catalyzes the NADPH dependent reduction of L-gamma- glutamyl 5-phosphate into L-glutamate 5-semialdehyde and phosphate                            |
| N | Q1WRR6 | CC | The product spontaneously undergoes cyclization to form 1-pyrroline-5-carboxylate                                                                 |
| N | Q1WRR6 | DE | GSA dehydrogenase;                                                                                                                                |
| N | Q1WRR6 | DE | Gamma-glutamyl phosphate reductase;                                                                                                               |
| N | Q1WRR6 | DE | Glutamate-5-semialdehyde dehydrogenase;                                                                                                           |

|   |        |    |                                                                                                                                                                                                                         |
|---|--------|----|-------------------------------------------------------------------------------------------------------------------------------------------------------------------------------------------------------------------------|
| N | Q1WRR6 | DE | Glutamyl-gamma-semialdehyde dehydrogenase;                                                                                                                                                                              |
| N | Q1WRR6 | DR | glutamate-5-semialdehyde dehydrogenase activity                                                                                                                                                                         |
| N | Q1WRR6 | DR | oxidation-reduction process                                                                                                                                                                                             |
| N | Q1WRR6 | DR | proline biosynthetic process                                                                                                                                                                                            |
| N | Q1X711 | CC | Promotes the survival of neuronal populations that are all located either in the central nervous system or directly connected to it (By similarity).                                                                    |
| N | Q1X711 | DE | Brain-derived neurotrophic factor;                                                                                                                                                                                      |
| N | Q1X711 | DE | DE Flags: Precursor; Fragment;                                                                                                                                                                                          |
| N | Q1X711 | DR | growth factor activity                                                                                                                                                                                                  |
| N | Q1XDE8 | DE | 50S ribosomal protein L12, chloroplastic;                                                                                                                                                                               |
| N | Q1XDE8 | DR | structural constituent of ribosome                                                                                                                                                                                      |
| N | Q1XDN4 | CC | Binds directly to 16S ribosomal RNA (By similarity).                                                                                                                                                                    |
| N | Q1XDN4 | DE | 30S ribosomal protein S20, chloroplastic;                                                                                                                                                                               |
| N | Q1XDN4 | DR | structural constituent of ribosome                                                                                                                                                                                      |
| N | Q1XFL1 | DE | ZAR1-like protein;                                                                                                                                                                                                      |
| N | Q1XFL1 | DR | bile acid:sodium symporter activity                                                                                                                                                                                     |
| N | Q1ZXE6 | CC | Component of the anaphase promoting complex/cyclosome (APC/C), a cell cycle-regulated E3 ubiquitin-protein ligase complex that controls progression through mitosis and the G1 phase of the cell cycle (By similarity). |
| N | Q1ZXE6 | DE | Anaphase-promoting complex subunit 6;                                                                                                                                                                                   |
| N | Q1ZXE6 | DE | Cell division cycle protein 16 homolog;                                                                                                                                                                                 |
| N | Q1ZXE6 | DR | cell division                                                                                                                                                                                                           |
| N | Q1ZXI3 | DE | Putative uncharacterized protein DDB_G0278881;                                                                                                                                                                          |
| N | Q20459 | CC | Probable metalloprotease (By similarity).                                                                                                                                                                               |
| N | Q20459 | DE | Nematode astacin 25;                                                                                                                                                                                                    |
| N | Q20459 | DE | Zinc metalloproteinase nas-25;                                                                                                                                                                                          |
| N | Q20459 | DR | metalloendopeptidase activity                                                                                                                                                                                           |
| N | Q20459 | DR | zinc ion binding                                                                                                                                                                                                        |
| N | Q20F03 | DE | 30S ribosomal protein S11, chloroplastic;                                                                                                                                                                               |
| N | Q20F03 | DR | structural constituent of ribosome                                                                                                                                                                                      |
| N | Q20FQ1 | CC | Component of the ubiquinol-cytochrome c reductase complex (complex III or cytochrome b-c1 complex), which is a respiratory chain that generates an electrochemical potential coupled to ATP synthesis (By similarity).  |
| N | Q20FQ1 | DE | Complex III subunit 3;                                                                                                                                                                                                  |
| N | Q20FQ1 | DE | Complex III subunit III;                                                                                                                                                                                                |
| N | Q20FQ1 | DE | Cytochrome b-c1 complex subunit 3;                                                                                                                                                                                      |
| N | Q20FQ1 | DE | Cytochrome b;                                                                                                                                                                                                           |
| N | Q20FQ1 | DE | Ubiquinol-cytochrome-c reductase complex cytochrome b subunit;                                                                                                                                                          |
| N | Q20FQ1 | DR | electron carrier activity                                                                                                                                                                                               |
| N | Q20FQ1 | DR | metal ion binding                                                                                                                                                                                                       |
| N | Q20FQ1 | DR | oxidoreductase activity                                                                                                                                                                                                 |
| N | Q20FQ1 | DR | respiratory electron transport chain                                                                                                                                                                                    |
| N | Q20NV4 | CC | Implicated in endonuclease cleavage of capped RNA primers                                                                                                                                                               |
| N | Q20NV4 | CC | Dispensable for viral transcription, but not replication (By similarity).                                                                                                                                               |
| N | Q20NV4 | CC | Displays an elongation factor activity in viral RNA synthesis                                                                                                                                                           |
| N | Q20NV4 | DE | Polymerase acidic protein;                                                                                                                                                                                              |
| N | Q20NV4 | DE | RNA-directed RNA polymerase subunit P2;                                                                                                                                                                                 |
| N | Q20NV4 | DR | RNA-directed RNA polymerase activity                                                                                                                                                                                    |
| N | Q210F5 | DE | Urea amidohydrolase subunit gamma;                                                                                                                                                                                      |
| N | Q210F5 | DE | Urease subunit gamma;                                                                                                                                                                                                   |
| N | Q210F5 | DR | nickel ion binding                                                                                                                                                                                                      |
| N | Q210F5 | DR | urea metabolic process                                                                                                                                                                                                  |
| N | Q210F5 | DR | urease activity                                                                                                                                                                                                         |
| N | Q213W6 | CC | Catalyzes the folate-dependent formation of 5-methyl- uridine at position 54 (M-5-U54) in all tRNAs (By similarity).                                                                                                    |
| N | Q213W6 | DE | Folate-dependent tRNA (uracil-5-)-methyltransferase;                                                                                                                                                                    |
| N | Q213W6 | DE | Folate-dependent tRNA(M-5-U54)-methyltransferase;                                                                                                                                                                       |
| N | Q213W6 | DE | Methylenetetrahydrofolate--tRNA-(uracil-5-)-methyltransferase TrmFO;                                                                                                                                                    |
| N | Q213W6 | DR | flavin adenine dinucleotide binding                                                                                                                                                                                     |
| N | Q213W6 | DR | methylenetetrahydrofolate-tRNA-(uracil-5-)-methyltransferase (FADH2-oxidizing) activity                                                                                                                                 |
| N | Q213W6 | DR | tRNA processing                                                                                                                                                                                                         |
| N | Q21407 | DE | Putative glycerophosphocholine phosphodiesterase GPCPD1 homolog K10B3.6;                                                                                                                                                |
| N | Q21407 | DR | carbohydrate binding                                                                                                                                                                                                    |
| N | Q21407 | DR | glycerol metabolic process                                                                                                                                                                                              |

|   |        |    |                                                                                                                                                               |
|---|--------|----|---------------------------------------------------------------------------------------------------------------------------------------------------------------|
| N | Q21407 | DR | glycerophosphodiester phosphodiesterase activity                                                                                                              |
| N | Q21407 | DR | lipid metabolic process                                                                                                                                       |
| N | Q214R5 | DE | Putative 3-methyladenine DNA glycosylase;                                                                                                                     |
| N | Q214R5 | DR | alkylbase DNA N-glycosylase activity                                                                                                                          |
| N | Q214R5 | DR | base-excision repair                                                                                                                                          |
| N | Q215B8 | DE | Anthranilate phosphoribosyltransferase;                                                                                                                       |
| N | Q215B8 | DR | anthranilate phosphoribosyltransferase activity                                                                                                               |
| N | Q215B8 | DR | tryptophan biosynthetic process                                                                                                                               |
| N | Q215E3 | CC | Catalyzes the NADP-dependent rearrangement and reduction of 1-deoxy-D-xylulose-5-phosphate (DXP) to 2-C-methyl-D-erythritol 4-phosphate (MEP) (By similarity) |
| N | Q215E3 | DE | 1-deoxy-D-xylulose 5-phosphate reductoisomerase;                                                                                                              |
| N | Q215E3 | DE | 1-deoxyxylulose-5-phosphate reductoisomerase;                                                                                                                 |
| N | Q215E3 | DE | 2-C-methyl-D-erythritol 4-phosphate synthase;                                                                                                                 |
| N | Q215E3 | DE | DXP reductoisomerase;                                                                                                                                         |
| N | Q215E3 | DR | 1-deoxy-D-xylulose-5-phosphate reductoisomerase activity                                                                                                      |
| N | Q215E3 | DR | isoprenoid biosynthetic process                                                                                                                               |
| N | Q215E3 | DR | metal ion binding                                                                                                                                             |
| N | Q215E3 | DR | oxidation-reduction process                                                                                                                                   |
| N | Q215E6 | CC | Responsible for the release of ribosomes from messenger RNA at the termination of protein biosynthesis                                                        |
| N | Q215E6 | CC | May increase the efficiency of translation by recycling ribosomes from one round of translation to another (By similarity).                                   |
| N | Q215E6 | DE | Ribosome-recycling factor;                                                                                                                                    |
| N | Q215E6 | DE | Ribosome-releasing factor;                                                                                                                                    |
| N | Q21890 | DE | Uncharacterized protein R102.4;                                                                                                                               |
| N | Q21890 | DR | cellular amino acid metabolic process                                                                                                                         |
| N | Q21890 | DR | lyase activity                                                                                                                                                |
| N | Q21890 | DR | pyridoxal phosphate binding                                                                                                                                   |
| N | Q219R0 | CC | Uses Mg-ATP and reduced ferredoxin to reduce ring D of protochlorophyllide (Pchlde) to form chlorophyllide a (Chlide) (By similarity)                         |
| N | Q219R0 | CC | This reaction is light-independent.                                                                                                                           |
| N | Q219R0 | DE | DPOR subunit B;                                                                                                                                               |
| N | Q219R0 | DE | LI-POR subunit B;                                                                                                                                             |
| N | Q219R0 | DE | Light-independent protochlorophyllide reductase subunit B;                                                                                                    |
| N | Q219R0 | DR | bacteriochlorophyll biosynthetic process                                                                                                                      |
| N | Q219R0 | DR | oxidation-reduction process                                                                                                                                   |
| N | Q219R0 | DR | oxidoreductase activity, acting on iron-sulfur proteins as donors                                                                                             |
| N | Q219R0 | DR | photosynthesis, dark reaction                                                                                                                                 |
| N | Q21DY7 | CC | Synthesis of 3-octaprenyl-4-hydroxybenzoate (By similarity).                                                                                                  |
| N | Q21DY7 | DE | 4-HB polyprenyltransferase;                                                                                                                                   |
| N | Q21DY7 | DE | 4-hydroxybenzoate octaprenyltransferase;                                                                                                                      |
| N | Q21DY7 | DR | prenyltransferase activity                                                                                                                                    |
| N | Q21DY7 | DR | ubiquinone biosynthetic process                                                                                                                               |
| N | Q21FH2 | CC | Involved in rRNA and/or ribosome maturation and assembly                                                                                                      |
| N | Q21FH2 | CC | May have metal-dependent hydrolase activity (By similarity).                                                                                                  |
| N | Q21FH2 | CC | Required for normal 5' and 3' processing of 16S, 23S and 5S rRNAs                                                                                             |
| N | Q21FH2 | DE | Probable rRNA maturation factor;                                                                                                                              |
| N | Q21FH2 | DR | metal ion binding                                                                                                                                             |
| N | Q21FH2 | DR | metalloendopeptidase activity                                                                                                                                 |
| N | Q21FH2 | DR | rRNA processing                                                                                                                                               |
| N | Q21H92 | CC | May play a role in 30S ribosomal subunit biogenesis                                                                                                           |
| N | Q21H92 | CC | Unusual circularly permuted GTPase that catalyzes rapid hydrolysis of GTP with a slow catalytic turnover (By similarity).                                     |
| N | Q21H92 | DE | Putative ribosome biogenesis GTPase RsgA;                                                                                                                     |
| N | Q21H92 | DR | GTPase activity                                                                                                                                               |
| N | Q21H92 | DR | metal ion binding                                                                                                                                             |
| N | Q21LV8 | CC | Binds to the 23S rRNA (By similarity).                                                                                                                        |
| N | Q21LV8 | DE | 50S ribosomal protein L9;                                                                                                                                     |
| N | Q21LV8 | DR | structural constituent of ribosome                                                                                                                            |
| N | Q21M35 | CC | Located on the platform of the 30S subunit, it bridges several disparate RNA helices of the 16S rRNA                                                          |
| N | Q21M35 | CC | Forms part of the Shine-Dalgarno cleft in the 70S ribosome (By similarity).                                                                                   |
| N | Q21M35 | DE | 30S ribosomal protein S11;                                                                                                                                    |
| N | Q21M35 | DR | structural constituent of ribosome                                                                                                                            |
| N | Q21MA4 | DE | Aspartate--tRNA ligase;                                                                                                                                       |

|   |        |    |                                                                                                                                                                                                                                                                                                            |
|---|--------|----|------------------------------------------------------------------------------------------------------------------------------------------------------------------------------------------------------------------------------------------------------------------------------------------------------------|
| N | Q21MA4 | DE | Aspartyl-tRNA synthetase;                                                                                                                                                                                                                                                                                  |
| N | Q21MA4 | DR | aspartate-tRNA ligase activity                                                                                                                                                                                                                                                                             |
| N | Q21MA4 | DR | aspartyl-tRNA aminoacylation                                                                                                                                                                                                                                                                               |
| N | Q21MA4 | DR | nucleic acid binding                                                                                                                                                                                                                                                                                       |
| N | Q21MZ8 | DE | Phosphoribosylaminoimidazole-succinocarboxamide synthase;                                                                                                                                                                                                                                                  |
| N | Q21MZ8 | DE | SAICAR synthetase;                                                                                                                                                                                                                                                                                         |
| N | Q21MZ8 | DR | phosphoribosylaminoimidazolesuccinocarboxamide synthase activity                                                                                                                                                                                                                                           |
| N | Q21MZ8 | DR | purine nucleotide biosynthetic process                                                                                                                                                                                                                                                                     |
| N | Q21U91 | CC | IGPS catalyzes the conversion of PRFAR and glutamine to IGP, AICAR and glutamate.                                                                                                                                                                                                                          |
| N | Q21U91 | CC | The hisF subunit catalyzes the cyclization activity that produces IGP and AICAR from PRFAR using the ammonia provided by the hisH subunit (By similarity).                                                                                                                                                 |
| N | Q21U91 | DE | IGP synthase cyclase subunit;                                                                                                                                                                                                                                                                              |
| N | Q21U91 | DE | IGP synthase subunit hisF;                                                                                                                                                                                                                                                                                 |
| N | Q21U91 | DE | IGPS subunit hisF;                                                                                                                                                                                                                                                                                         |
| N | Q21U91 | DE | ImGP synthase subunit hisF;                                                                                                                                                                                                                                                                                |
| N | Q21U91 | DE | Imidazole glycerol phosphate synthase subunit hisF;                                                                                                                                                                                                                                                        |
| N | Q21U91 | DR | histidine biosynthetic process                                                                                                                                                                                                                                                                             |
| N | Q21U91 | DR | imidazoleglycerol-phosphate synthase activity                                                                                                                                                                                                                                                              |
| N | Q21U91 | DR | lyase activity                                                                                                                                                                                                                                                                                             |
| N | Q21X08 | CC | Participates actively in the response to hyperosmotic and heat shock by preventing the aggregation of stress-denatured proteins, in association with dnaK and dnaE.                                                                                                                                        |
| N | Q21X08 | CC | GrpE releases ADP from dnaK; ATP binding to dnaK triggers the release of the substrate protein, thus completing the reaction cycle                                                                                                                                                                         |
| N | Q21X08 | CC | It is the nucleotide exchange factor for dnaK and may function as a thermosensor                                                                                                                                                                                                                           |
| N | Q21X08 | CC | Several rounds of ATP- dependent interactions between dnaJ, dnaK and grpE are required for fully efficient folding (By similarity). Unfolded proteins bind initially to dnaJ; upon interaction with the dnaJ-bound protein, dnaK hydrolyzes its bound ATP, resulting in the formation of a stable complex. |
| N | Q21X08 | DE | HSP-70 cofactor;                                                                                                                                                                                                                                                                                           |
| N | Q21X08 | DE | Protein grpE;                                                                                                                                                                                                                                                                                              |
| N | Q21X08 | DR | adenyl-nucleotide exchange factor activity                                                                                                                                                                                                                                                                 |
| N | Q21X08 | DR | chaperone binding                                                                                                                                                                                                                                                                                          |
| N | Q21X08 | DR | protein folding                                                                                                                                                                                                                                                                                            |
| N | Q21X08 | DR | protein homodimerization activity                                                                                                                                                                                                                                                                          |
| N | Q21X08 | DR | response to stress                                                                                                                                                                                                                                                                                         |
| N | Q22000 | DE | Probable 3',5'-cyclic phosphodiesterase pde-4;                                                                                                                                                                                                                                                             |
| N | Q22000 | DR | 3',5'-cyclic-nucleotide phosphodiesterase activity                                                                                                                                                                                                                                                         |
| N | Q22000 | DR | metal ion binding                                                                                                                                                                                                                                                                                          |
| N | Q22000 | DR | negative regulation of cAMP-mediated signaling                                                                                                                                                                                                                                                             |
| N | Q22000 | DR | negative regulation of locomotion                                                                                                                                                                                                                                                                          |
| N | Q22000 | DR | signal transduction                                                                                                                                                                                                                                                                                        |
| N | Q23469 | DE | UPF0392 protein ZK381.2;                                                                                                                                                                                                                                                                                   |
| N | Q23946 | CC | Sequence-specific transcription factor which is part of a developmental regulatory system that provides cells with specific positional identities on the anterior-posterior axis.                                                                                                                          |
| N | Q23946 | CC | Binds the consensus region 5'-TTAAT[GT][GA]-3'                                                                                                                                                                                                                                                             |
| N | Q23946 | CC | It activates the synthesis of the decapentaplegic (Dpp) growth factor (By similarity).                                                                                                                                                                                                                     |
| N | Q23946 | CC | This homeotic protein controls development of the cells in the posterior thoracic and first abdominal segments                                                                                                                                                                                             |
| N | Q23946 | DE | Homeotic protein ultrabithorax;                                                                                                                                                                                                                                                                            |
| N | Q23946 | DR | multicellular organismal development                                                                                                                                                                                                                                                                       |
| N | Q23946 | DR | regulation of transcription, DNA-dependent                                                                                                                                                                                                                                                                 |
| N | Q23946 | DR | sequence-specific DNA binding transcription factor activity                                                                                                                                                                                                                                                |
| N | Q23949 | CC | Member of the regulatory pathway controlling female somatic sexual differentiation, regulated by Sxl                                                                                                                                                                                                       |
| N | Q23949 | CC | Activates dsx female-specific splicing by promoting the formation of a splicing enhancer complex which consists of tra, tra2 and sr proteins.                                                                                                                                                              |
| N | Q23949 | DE | Female-specific protein transformer;                                                                                                                                                                                                                                                                       |
| N | Q23949 | DR | cell differentiation                                                                                                                                                                                                                                                                                       |
| N | Q23949 | DR | female sex differentiation                                                                                                                                                                                                                                                                                 |
| N | Q23949 | DR | mRNA processing                                                                                                                                                                                                                                                                                            |
| N | Q24118 | DE | Protein linotte;                                                                                                                                                                                                                                                                                           |
| N | Q24118 | DE | Protein pigeon;                                                                                                                                                                                                                                                                                            |
| N | Q24337 | CC | Acts as an enhancer of the rudimentary gene                                                                                                                                                                                                                                                                |
| N | Q24337 | CC | Has a role in pyrimidine biosynthesis and the cell cycle.                                                                                                                                                                                                                                                  |
| N | Q24337 | DE | Protein enhancer of rudimentary;                                                                                                                                                                                                                                                                           |

|   |        |    |                                                                                                                                                                                                               |
|---|--------|----|---------------------------------------------------------------------------------------------------------------------------------------------------------------------------------------------------------------|
| N | Q24337 | DR | protein binding                                                                                                                                                                                               |
| N | Q24337 | DR | pyrimidine nucleotide biosynthetic process                                                                                                                                                                    |
| N | Q24472 | CC | Functions in cell cycle regulation                                                                                                                                                                            |
| N | Q24472 | CC | Component of the DREAM complex, a multiprotein complex that can both act as a transcription activator or repressor depending on the context                                                                   |
| N | Q24472 | CC | During development, the complex represses transcription of developmentally controlled E2F target genes.                                                                                                       |
| N | Q24472 | CC | In follicle cells, the complex plays a central role in the site- specific DNA replication at the chorion loci                                                                                                 |
| N | Q24472 | DE | Retinoblastoma family protein;                                                                                                                                                                                |
| N | Q24472 | DR | DNA endoreduplication                                                                                                                                                                                         |
| N | Q24472 | DR | G1 phase of mitotic cell cycle                                                                                                                                                                                |
| N | Q24472 | DR | eggshell chorion gene amplification                                                                                                                                                                           |
| N | Q24472 | DR | endomitotic cell cycle                                                                                                                                                                                        |
| N | Q24472 | DR | negative regulation of DNA replication                                                                                                                                                                        |
| N | Q24472 | DR | negative regulation of S phase of mitotic cell cycle                                                                                                                                                          |
| N | Q24472 | DR | negative regulation of apoptosis                                                                                                                                                                              |
| N | Q24472 | DR | negative regulation of cell proliferation                                                                                                                                                                     |
| N | Q24472 | DR | negative regulation of transcription from RNA polymerase II promoter                                                                                                                                          |
| N | Q24472 | DR | promoter binding                                                                                                                                                                                              |
| N | Q24472 | DR | regulation of DNA binding                                                                                                                                                                                     |
| N | Q24472 | DR | transcription factor binding                                                                                                                                                                                  |
| N | Q24509 | CC | Mediates endoplasmic reticulum to Golgi transport (By similarity).                                                                                                                                            |
| N | Q24509 | DE | Sed5 protein;                                                                                                                                                                                                 |
| N | Q24509 | DR | SNAP receptor activity                                                                                                                                                                                        |
| N | Q24509 | DR | intracellular protein transport                                                                                                                                                                               |
| N | Q24509 | DR | neurotransmitter secretion                                                                                                                                                                                    |
| N | Q24509 | DR | phagocytosis, engulfment                                                                                                                                                                                      |
| N | Q24509 | DR | protein homodimerization activity                                                                                                                                                                             |
| N | Q24817 | DE | DE Flags: Precursor; Fragment;                                                                                                                                                                                |
| N | Q24817 | DE | Rho-related protein racD;                                                                                                                                                                                     |
| N | Q24817 | DR | small GTPase mediated signal transduction                                                                                                                                                                     |
| N | Q24JP1 | DE | Protein alcS;                                                                                                                                                                                                 |
| N | Q24PG6 | DE | Sugar fermentation stimulation protein homolog;                                                                                                                                                               |
| N | Q24QI7 | CC | Required for the first step of histidine biosynthesis                                                                                                                                                         |
| N | Q24QI7 | CC | May allow the feedback regulation of ATP phosphoribosyltransferase activity by histidine (By similarity).                                                                                                     |
| N | Q24QI7 | DE | ATP phosphoribosyltransferase regulatory subunit;                                                                                                                                                             |
| N | Q24QI7 | DR | histidine biosynthetic process                                                                                                                                                                                |
| N | Q24QI7 | DR | histidine-tRNA ligase activity                                                                                                                                                                                |
| N | Q24QI7 | DR | histidyl-tRNA aminoacylation                                                                                                                                                                                  |
| N | Q24UY9 | CC | Involved in the transcription termination process (By similarity).                                                                                                                                            |
| N | Q24UY9 | DE | N utilization substance protein B homolog;                                                                                                                                                                    |
| N | Q24UY9 | DE | Protein nusB;                                                                                                                                                                                                 |
| N | Q24UY9 | DR | regulation of transcription, DNA-dependent                                                                                                                                                                    |
| N | Q24UY9 | DR | transcription termination factor activity                                                                                                                                                                     |
| N | Q250M9 | CC | One of the primary rRNA binding proteins                                                                                                                                                                      |
| N | Q250M9 | CC | it has been suggested to have peptidyltransferase activity; this is somewhat controversial                                                                                                                    |
| N | Q250M9 | CC | Makes several contacts with the 16S rRNA in the 70S ribosome (By similarity).                                                                                                                                 |
| N | Q250M9 | CC | Required for association of the 30S and 50S subunits to form the 70S ribosome, for tRNA binding and peptide bond formation                                                                                    |
| N | Q250M9 | DE | 50S ribosomal protein L2;                                                                                                                                                                                     |
| N | Q250M9 | DR | structural constituent of ribosome                                                                                                                                                                            |
| N | Q250M9 | DR | transferase activity                                                                                                                                                                                          |
| N | Q27562 | CC | The proteasome is a multicatalytic proteinase complex which is characterized by its ability to cleave peptides with Arg, Phe, Tyr, Leu, and Glu adjacent to the leaving group at neutral or slightly basic pH |
| N | Q27562 | CC | The proteasome has an ATP-dependent proteolytic activity.                                                                                                                                                     |
| N | Q27562 | DE | Proteasome subunit C2;                                                                                                                                                                                        |
| N | Q27562 | DE | Proteasome subunit alpha type-1;                                                                                                                                                                              |
| N | Q27562 | DR | threonine-type endopeptidase activity                                                                                                                                                                         |
| N | Q27562 | DR | ubiquitin-dependent protein catabolic process                                                                                                                                                                 |
| N | Q27U48 | CC | Tubulin is the major constituent of microtubules                                                                                                                                                              |
| N | Q27U48 | CC | It binds two moles of GTP, one at an exchangeable site on the beta chain and one at a non-exchangeable site on the alpha-chain (By similarity).                                                               |

|   |        |    |                                                                                                                                                                              |
|---|--------|----|------------------------------------------------------------------------------------------------------------------------------------------------------------------------------|
| N | Q27U48 | DE | Beta-1-tubulin;                                                                                                                                                              |
| N | Q27U48 | DE | Tubulin beta-1 chain;                                                                                                                                                        |
| N | Q27U48 | DR | GTPase activity                                                                                                                                                              |
| N | Q27U48 | DR | microtubule-based movement                                                                                                                                                   |
| N | Q27U48 | DR | protein polymerization                                                                                                                                                       |
| N | Q27U48 | DR | structural molecule activity                                                                                                                                                 |
| N | Q28066 | CC | Controls the classical pathway of complement activation                                                                                                                      |
| N | Q28066 | CC | It also accelerates the degradation of the C4bC2a complex (C3 convertase) by dissociating the complement fragment C2a                                                        |
| N | Q28066 | CC | It also interacts with serum amyloid P component.                                                                                                                            |
| N | Q28066 | CC | It binds as a cofactor to C3b/C4b inactivator (C3bINA), which then hydrolyzes the complement fragment C4b                                                                    |
| N | Q28066 | DE | C4b-binding protein beta chain;                                                                                                                                              |
| N | Q28066 | DR | complement activation, classical pathway                                                                                                                                     |
| N | Q28066 | DR | innate immune response                                                                                                                                                       |
| N | Q28224 | CC | May mediate the control of various cellular processes by insulin                                                                                                             |
| N | Q28224 | CC | Activates phosphatidylinositol 3-kinase when bound to the regulatory p85 subunit (By similarity).                                                                            |
| N | Q28224 | CC | when phosphorylated by the insulin receptor binds specifically to various cellular proteins containing SH2 domains such as phosphatidylinositol 3-kinase p85 subunit or GPR2 |
| N | Q28224 | DE | Insulin receptor substrate 1;                                                                                                                                                |
| N | Q28224 | DR | SH2 domain binding                                                                                                                                                           |
| N | Q28224 | DR | insulin receptor binding                                                                                                                                                     |
| N | Q28224 | DR | insulin receptor signaling pathway                                                                                                                                           |
| N | Q28224 | DR | insulin-like growth factor receptor binding                                                                                                                                  |
| N | Q28224 | DR | insulin-like growth factor receptor signaling pathway                                                                                                                        |
| N | Q28224 | DR | phosphatidylinositol 3-kinase binding                                                                                                                                        |
| N | Q28224 | DR | signal transducer activity                                                                                                                                                   |
| N | Q28566 | CC | Participates in the regulation of gene transcription                                                                                                                         |
| N | Q28566 | CC | Binds DNA in a non-specific manner, yet also specifically recognizes the core sequence 5'-CAC[GA]TG-3'                                                                       |
| N | Q28566 | CC | Seems to activate the transcription of growth-related genes (By similarity).                                                                                                 |
| N | Q28566 | DE | Myc proto-oncogene protein;                                                                                                                                                  |
| N | Q28566 | DE | Proto-oncogene c-Myc;                                                                                                                                                        |
| N | Q28566 | DE | Transcription factor p64;                                                                                                                                                    |
| N | Q28566 | DR | DNA fragmentation involved in apoptotic nuclear change                                                                                                                       |
| N | Q28566 | DR | activation of caspase activity                                                                                                                                               |
| N | Q28566 | DR | activation of pro-apoptotic gene products                                                                                                                                    |
| N | Q28566 | DR | induction of apoptosis by intracellular signals                                                                                                                              |
| N | Q28566 | DR | negative regulation of survival gene product expression                                                                                                                      |
| N | Q28566 | DR | positive regulation of cell proliferation                                                                                                                                    |
| N | Q28566 | DR | regulation of transcription, DNA-dependent                                                                                                                                   |
| N | Q28566 | DR | release of cytochrome c from mitochondria                                                                                                                                    |
| N | Q28566 | DR | response to radiation                                                                                                                                                        |
| N | Q28566 | DR | sequence-specific DNA binding transcription factor activity                                                                                                                  |
| N | Q28566 | DR | transcription activator activity                                                                                                                                             |
| N | Q28806 | CC | ICAM proteins are ligands for the leukocyte adhesion protein LFA-1 (integrin alpha-L/beta-2)                                                                                 |
| N | Q28806 | CC | During leukocyte trans- endothelial migration, ICAM1 engagement promotes the assembly of endothelial apical cups through ARHGEF26/SGEF and RHOG activation (By similarity).  |
| N | Q28806 | DE | Intercellular adhesion molecule 1;                                                                                                                                           |
| N | Q28896 | CC | May play a role in carrying and orienting carbohydrate, as well as having a more specific role.                                                                              |
| N | Q28896 | DE | CAMPATH-1 antigen;                                                                                                                                                           |
| N | Q28896 | DE | Epididymal secretory protein E5;                                                                                                                                             |
| N | Q28FQ5 | CC | DNA repair enzyme that can remove a variety of covalent adducts from DNA through hydrolysis of a 5'-phosphodiester bond, giving rise to DNA with a free 5' phosphate         |
| N | Q28FQ5 | CC | Catalyzes the hydrolysis of dead-end complexes between DNA and the topoisomerase 2 (top2) active site tyrosine residue                                                       |
| N | Q28FQ5 | CC | Hydrolyzes 5'- phosphoglycolates on protruding 5' ends on DNA double-strand breaks (DSBs) due to DNA damage by radiation and free radicals (By similarity).                  |
| N | Q28FQ5 | DE | 5'-Tyr-DNA phosphodiesterase;                                                                                                                                                |
| N | Q28FQ5 | DE | 5'-tyrosyl-DNA phosphodiesterase;                                                                                                                                            |
| N | Q28FQ5 | DE | TRAF and TNF receptor-associated protein homolog;                                                                                                                            |

|   |        |    |                                                                                                                                                                                                                                              |
|---|--------|----|----------------------------------------------------------------------------------------------------------------------------------------------------------------------------------------------------------------------------------------------|
| N | Q28FQ5 | DE | Tyr-DNA phosphodiesterase 2;                                                                                                                                                                                                                 |
| N | Q28FQ5 | DE | Tyrosyl-DNA phosphodiesterase 2;                                                                                                                                                                                                             |
| N | Q28FQ5 | DR | 5'-tyrosyl-DNA phosphodiesterase activity                                                                                                                                                                                                    |
| N | Q28FQ5 | DR | double-strand break repair                                                                                                                                                                                                                   |
| N | Q28FQ5 | DR | metal ion binding                                                                                                                                                                                                                            |
| N | Q28FQ5 | DR | nuclease activity                                                                                                                                                                                                                            |
| N | Q28FQ5 | DR | receptor activity                                                                                                                                                                                                                            |
| N | Q28H04 | CC | Ubiquitin-like protein that can be covalently attached to proteins as a monomer or as a lysine-linked polymer                                                                                                                                |
| N | Q28H04 | CC | Covalent attachment via an isopeptide bond to its substrates requires prior activation by the E1 complex sae1-sae2 and linkage to the E2 enzyme ube2i, and can be promoted by an E3 ligase such as pias1-4                                   |
| N | Q28H04 | CC | polymeric sumo2 chains are also susceptible to polyubiquitination which functions as a signal for proteasomal degradation of modified proteins (By similarity)                                                                               |
| N | Q28H04 | CC | This post-translational modification on lysine residues of proteins plays a crucial role in a number of cellular processes such as nuclear transport, DNA replication and repair, mitosis and signal transduction                            |
| N | Q28H04 | DE | Small ubiquitin-related modifier 2;                                                                                                                                                                                                          |
| N | Q28HC9 | DE | Protein FAM103A1;                                                                                                                                                                                                                            |
| N | Q28IL7 | DE | Oligosaccharyltransferase complex subunit oste;                                                                                                                                                                                              |
| N | Q28N58 | CC | Catalyzes amidations at positions D, D, E, and G on adenosinecytosine A,C- diamide                                                                                                                                                           |
| N | Q28N58 | CC | NH(2) groups are provided by glutamine, and one molecule of ATP is hydrogenolyzed for each amidation (By similarity).                                                                                                                        |
| N | Q28N58 | DE | Cobyric acid synthase;                                                                                                                                                                                                                       |
| N | Q28N58 | DR | catalytic activity                                                                                                                                                                                                                           |
| N | Q28N58 | DR | cobalamin biosynthetic process                                                                                                                                                                                                               |
| N | Q28N58 | DR | glutamine metabolic process                                                                                                                                                                                                                  |
| N | Q28U74 | DE | Succinyl-CoA ligase [ADP-forming] subunit beta;                                                                                                                                                                                              |
| N | Q28U74 | DE | Succinyl-CoA synthetase subunit beta;                                                                                                                                                                                                        |
| N | Q28U74 | DR | metal ion binding                                                                                                                                                                                                                            |
| N | Q28U74 | DR | succinate-CoA ligase (ADP-forming) activity                                                                                                                                                                                                  |
| N | Q28U74 | DR | tricarboxylic acid cycle                                                                                                                                                                                                                     |
| N | Q28UJ8 | CC | Catalyzes the methylthiolation of N6- (dimethylallyl)adenosine (i(6)A), leading to the formation of 2- methylthio-N6-(dimethylallyl)adenosine (ms(2)i(6)A) at position 37 in tRNAs that read codons beginning with uridine (By similarity).  |
| N | Q28UJ8 | DE | (Dimethylallyl)adenosine tRNA methylthiotransferase miaB;                                                                                                                                                                                    |
| N | Q28UJ8 | DE | tRNA-i(6)A37 methylthiotransferase;                                                                                                                                                                                                          |
| N | Q28UJ8 | DR | 4 iron, 4 sulfur cluster binding                                                                                                                                                                                                             |
| N | Q28UJ8 | DR | metal ion binding                                                                                                                                                                                                                            |
| N | Q28UJ8 | DR | tRNA modification                                                                                                                                                                                                                            |
| N | Q28UJ8 | DR | transferase activity                                                                                                                                                                                                                         |
| N | Q28UW8 | CC | Catalyzes the GTP-dependent ribosomal translocation step during translation elongation                                                                                                                                                       |
| N | Q28UW8 | CC | Catalyzes the coordinated movement of the two tRNA molecules, the mRNA and conformational changes in the ribosome (By similarity).                                                                                                           |
| N | Q28UW8 | CC | During this step, the ribosome changes from the pre-translocational (PRE) to the post- translocational (POST) state as the newly formed A-site-bound peptidyl- tRNA and P-site-bound deacylated tRNA move to the P and E sites, respectively |
| N | Q28UW8 | DE | Elongation factor G;                                                                                                                                                                                                                         |
| N | Q28UW8 | DR | GTPase activity                                                                                                                                                                                                                              |
| N | Q28UW8 | DR | translation elongation factor activity                                                                                                                                                                                                       |
| N | Q28XT3 | CC | Catalyzes the cofactor-independent reversible oxidation of gamma- hydroxybutyrate (GHB) to succinic semialdehyde (SSA) coupled to reduction of 2-ketoglutarate (2-KG) to D-2- hydroxyglutarate (D-2-HG)                                      |
| N | Q28XT3 | CC | L-3-hydroxybutyrate (L-3-OHB) is also a substrate for HOT when using 2-KG as hydrogen acceptor, resulting in the formation of D-2-HG (By similarity).                                                                                        |
| N | Q28XT3 | DE | Probable hydroxyacid-oxoacid transhydrogenase, mitochondrial;                                                                                                                                                                                |
| N | Q28XT3 | DR | hydroxyacid-oxoacid transhydrogenase activity                                                                                                                                                                                                |
| N | Q28XT3 | DR | metal ion binding                                                                                                                                                                                                                            |
| N | Q28XT3 | DR | molecular hydrogen transport                                                                                                                                                                                                                 |
| N | Q28XT3 | DR | oxidation-reduction process                                                                                                                                                                                                                  |
| N | Q29865 | CC | Involved in the presentation of foreign antigens to the immune system.                                                                                                                                                                       |
| N | Q29865 | DE | HLA class I histocompatibility antigen, Cw-18 alpha chain;                                                                                                                                                                                   |
| N | Q29865 | DE | MHC class I antigen Cw*18;                                                                                                                                                                                                                   |
| N | Q29865 | DR | antigen processing and presentation of peptide antigen via MHC class I                                                                                                                                                                       |
| N | Q29865 | DR | immune response                                                                                                                                                                                                                              |



|   |        |    |                                                                                                                                                                                                              |
|---|--------|----|--------------------------------------------------------------------------------------------------------------------------------------------------------------------------------------------------------------|
| N | Q29865 | DR | interspecies interaction between organisms                                                                                                                                                                   |
| N | Q299E6 | CC | A humoral factor that may play a role in stress tolerance (By similarity).                                                                                                                                   |
| N | Q299E6 | DE | Protein Turandot X;                                                                                                                                                                                          |
| N | Q299E6 | DR | innate immune response                                                                                                                                                                                       |
| N | Q299E6 | DR | response to bacterium                                                                                                                                                                                        |
| N | Q299E6 | DR | response to heat                                                                                                                                                                                             |
| N | Q299E6 | DR | response to oxidative stress                                                                                                                                                                                 |
| N | Q29JX6 | CC | Mediates response to the active Hedgehog (Hh) protein signal in embryos, functioning upstream or at the level of patched (ptc) (By similarity).                                                              |
| N | Q29JX6 | DE | Interference hedgehog;                                                                                                                                                                                       |
| N | Q29JX6 | DR | heparin binding                                                                                                                                                                                              |
| N | Q29JX6 | DR | protein homodimerization activity                                                                                                                                                                            |
| N | Q29JX6 | DR | smoothened signaling pathway                                                                                                                                                                                 |
| N | Q29L58 | CC | Required for polyglutamylation of axonemal tubulin in sensory cilia (By similarity).                                                                                                                         |
| N | Q29L58 | CC | Plays a role in anterograde intraflagellar transport (IFT), the process by which cilia precursors are transported from the base of the cilium to the site of their incorporation at the tip (By similarity). |
| N | Q29L58 | DE | TPR repeat protein 30 homolog;                                                                                                                                                                               |
| N | Q29L58 | DE | Tetratricopeptide repeat protein 30 homolog;                                                                                                                                                                 |
| N | Q29L58 | DR | intraflagellar transport                                                                                                                                                                                     |
| N | Q29L58 | DR | protein polyglutamylation                                                                                                                                                                                    |
| N | Q29L58 | DR | transporter activity                                                                                                                                                                                         |
| N | Q2A167 | CC | Plays an important role in the de novo pathway of purine nucleotide biosynthesis                                                                                                                             |
| N | Q2A167 | CC | Catalyzes the first committed step in the biosynthesis of AMP from IMP (By similarity).                                                                                                                      |
| N | Q2A167 | DE | Adenylosuccinate synthetase;                                                                                                                                                                                 |
| N | Q2A167 | DE | IMP--aspartate ligase;                                                                                                                                                                                       |
| N | Q2A167 | DR | adenylosuccinate synthase activity                                                                                                                                                                           |
| N | Q2A167 | DR | magnesium ion binding                                                                                                                                                                                        |
| N | Q2A167 | DR | purine nucleotide biosynthetic process                                                                                                                                                                       |
| N | Q2A1N3 | DE | 30S ribosomal protein S16;                                                                                                                                                                                   |
| N | Q2A1N3 | DR | structural constituent of ribosome                                                                                                                                                                           |
| N | Q2ES50 | CC | Serine protease inhibitor (By similarity).                                                                                                                                                                   |
| N | Q2ES50 | DE | Kunitz protease inhibitor 1;                                                                                                                                                                                 |
| N | Q2ES50 | DE | Kunitz protease inhibitor I;                                                                                                                                                                                 |
| N | Q2ES50 | DR | serine-type endopeptidase inhibitor activity                                                                                                                                                                 |
| N | Q2FET8 | DE | Galactose-6-phosphate isomerase subunit lacB;                                                                                                                                                                |
| N | Q2FET8 | DR | galactose-6-phosphate isomerase activity                                                                                                                                                                     |
| N | Q2FET8 | DR | lactose catabolic process                                                                                                                                                                                    |
| N | Q2FF22 | CC | Produces ATP from ADP in the presence of a proton gradient across the membrane.                                                                                                                              |
| N | Q2FF22 | CC | The alpha chain is a regulatory subunit (By similarity).                                                                                                                                                     |
| N | Q2FF22 | DE | ATP synthase F1 sector subunit alpha;                                                                                                                                                                        |
| N | Q2FF22 | DE | ATP synthase subunit alpha;                                                                                                                                                                                  |
| N | Q2FF22 | DE | F-ATPase subunit alpha;                                                                                                                                                                                      |
| N | Q2FF22 | DR | ATP hydrolysis coupled proton transport                                                                                                                                                                      |
| N | Q2FF22 | DR | ATP synthesis coupled proton transport                                                                                                                                                                       |
| N | Q2FF22 | DR | hydrogen ion transporting ATP synthase activity, rotational mechanism                                                                                                                                        |
| N | Q2FF22 | DR | proton-transporting ATPase activity, rotational mechanism                                                                                                                                                    |
| N | Q2FF35 | CC | Condenses 4-methyl-5-(beta-hydroxyethyl)thiazole monophosphate (THZ-P) and 2-methyl-4-amino-5-hydroxymethyl pyrimidine pyrophosphate (HMP-PP) to form thiamine monophosphate (TMP) (By similarity).          |
| N | Q2FF35 | DE | TMP pyrophosphorylase;                                                                                                                                                                                       |
| N | Q2FF35 | DE | Thiamine-phosphate pyrophosphorylase;                                                                                                                                                                        |
| N | Q2FF35 | DE | Thiamine-phosphate synthase;                                                                                                                                                                                 |
| N | Q2FF35 | DR | metal ion binding                                                                                                                                                                                            |
| N | Q2FF35 | DR | thiamine biosynthetic process                                                                                                                                                                                |
| N | Q2FF35 | DR | thiamine-phosphate diphosphorylase activity                                                                                                                                                                  |
| N | Q2FF62 | DE | Protein sprT-like;                                                                                                                                                                                           |
| N | Q2FF62 | DR | metal ion binding                                                                                                                                                                                            |
| N | Q2FFT2 | DE | Serine protease splD;                                                                                                                                                                                        |
| N | Q2FFT2 | DR | serine-type endopeptidase activity                                                                                                                                                                           |
| N | Q2FH42 | DE | Dihydrodipicolinate reductase;                                                                                                                                                                               |
| N | Q2FH42 | DR | diaminopimelate biosynthetic process                                                                                                                                                                         |
| N | Q2FH42 | DR | dihydrodipicolinate reductase activity                                                                                                                                                                       |
| N | Q2FH42 | DR | oxidation-reduction process                                                                                                                                                                                  |

|   |        |    |                                                                                                                                                                                                                          |
|---|--------|----|--------------------------------------------------------------------------------------------------------------------------------------------------------------------------------------------------------------------------|
| N | Q2FH63 | CC | The alpha subunit is responsible for the aldol cleavage of indoleglycerol phosphate to indole and glyceraldehyde 3- phosphate.                                                                                           |
| N | Q2FH63 | DE | Tryptophan synthase alpha chain;                                                                                                                                                                                         |
| N | Q2FH63 | DR | tryptophan synthase activity                                                                                                                                                                                             |
| N | Q2FHQ9 | DE | Protein MraZ;                                                                                                                                                                                                            |
| N | Q2FKN8 | CC | member of the two-component regulatory system waiK/waiR that regulates genes involved in autolysis, biofilm formation and cell wall metabolism (By similarity)                                                           |
| N | Q2FKN8 | DE | Transcriptional regulatory protein waiR;                                                                                                                                                                                 |
| N | Q2FKN8 | DR | regulation of transcription, DNA-dependent                                                                                                                                                                               |
| N | Q2FKN8 | DR | two-component response regulator activity                                                                                                                                                                                |
| N | Q2FPK3 | DE | Threonine--tRNA ligase;                                                                                                                                                                                                  |
| N | Q2FPK3 | DE | Threonyl-tRNA synthetase;                                                                                                                                                                                                |
| N | Q2FPK3 | DR | threonine-tRNA ligase activity                                                                                                                                                                                           |
| N | Q2FPK3 | DR | threonyl-tRNA aminoacylation                                                                                                                                                                                             |
| N | Q2FPK3 | DR | zinc ion binding                                                                                                                                                                                                         |
| N | Q2FQU2 | CC | Involved in the modulation of the chemotaxis system; catalyzes the demethylation of specific methylglutamate residues introduced into the chemoreceptors (methyl-accepting chemotaxis proteins) by CheR (By similarity). |
| N | Q2FQU2 | DE | Chemotaxis response regulator protein-glutamate methylesterase 2;                                                                                                                                                        |
| N | Q2FQU2 | DR | protein-glutamate methylesterase activity                                                                                                                                                                                |
| N | Q2FQU2 | DR | regulation of transcription, DNA-dependent                                                                                                                                                                               |
| N | Q2FQU2 | DR | two-component response regulator activity                                                                                                                                                                                |
| N | Q2FTS5 | DE | Putative thymidine phosphorylase;                                                                                                                                                                                        |
| N | Q2FTS5 | DR | pyrimidine base metabolic process                                                                                                                                                                                        |
| N | Q2FTS5 | DR | pyrimidine nucleoside metabolic process                                                                                                                                                                                  |
| N | Q2FTS5 | DR | thymidine phosphorylase activity                                                                                                                                                                                         |
| N | Q2FVN1 | CC | Probably required for nitrate uptake under anoxic conditions                                                                                                                                                             |
| N | Q2FVN1 | CC | Also possibly involved in excretion of nitrite produced by the dissimilatory reduction of nitrate (By similarity).                                                                                                       |
| N | Q2FVN1 | DE | Probable nitrate transporter narT;                                                                                                                                                                                       |
| N | Q2FVN1 | DR | nitrate assimilation                                                                                                                                                                                                     |
| N | Q2FVN1 | DR | transmembrane transport                                                                                                                                                                                                  |
| N | Q2FW10 | CC | Protein S19 forms a complex with S13 that binds strongly to the 16S ribosomal RNA (By similarity).                                                                                                                       |
| N | Q2FW10 | DE | 30S ribosomal protein S19;                                                                                                                                                                                               |
| N | Q2FW10 | DR | structural constituent of ribosome                                                                                                                                                                                       |
| N | Q2FX12 | CC | Dephosphorylates the phosphotyrosine-containing proteins (By similarity).                                                                                                                                                |
| N | Q2FX12 | DE | Low molecular weight protein-tyrosine-phosphatase ptpA;                                                                                                                                                                  |
| N | Q2FX12 | DE | Phosphotyrosine phosphatase A;                                                                                                                                                                                           |
| N | Q2FX12 | DR | protein dephosphorylation                                                                                                                                                                                                |
| N | Q2FX12 | DR | protein tyrosine phosphatase activity                                                                                                                                                                                    |
| N | Q2FYK3 | CC | Required for hemolysin production                                                                                                                                                                                        |
| N | Q2FYK3 | CC | Contributes to virulence in both silkworm-infection model and mice.                                                                                                                                                      |
| N | Q2FYK3 | DE | Conserved virulence factor C;                                                                                                                                                                                            |
| N | Q2FYK3 | DR | iron ion binding                                                                                                                                                                                                         |
| N | Q2FZ29 | CC | Protease subunit of a proteasome-like degradation complex believed to be a general protein degrading machinery (By similarity).                                                                                          |
| N | Q2FZ29 | DE | ATP-dependent protease subunit HsIV;                                                                                                                                                                                     |
| N | Q2FZ29 | DR | metal ion binding                                                                                                                                                                                                        |
| N | Q2FZ29 | DR | proteolysis involved in cellular protein catabolic process                                                                                                                                                               |
| N | Q2FZ29 | DR | response to stress                                                                                                                                                                                                       |
| N | Q2FZ29 | DR | threonine-type endopeptidase activity                                                                                                                                                                                    |
| N | Q2FZD3 | DE | MutS2 protein;                                                                                                                                                                                                           |
| N | Q2FZD3 | DR | damaged DNA binding                                                                                                                                                                                                      |
| N | Q2FZD3 | DR | maintenance of fidelity involved in DNA-dependent DNA replication                                                                                                                                                        |
| N | Q2FZD3 | DR | mismatch repair                                                                                                                                                                                                          |
| N | Q2FZD3 | DR | mismatched DNA binding                                                                                                                                                                                                   |
| N | Q2G0Q0 | CC | Involved in the hydrolysis of glutamine to glutamate and ammonia                                                                                                                                                         |
| N | Q2G0Q0 | CC | Channels an ammonia molecule to pdxS (By similarity).                                                                                                                                                                    |
| N | Q2G0Q0 | DE | Glutamine amidotransferase glutaminase subunit pdxT;                                                                                                                                                                     |
| N | Q2G0Q0 | DE | Glutamine amidotransferase subunit pdxT;                                                                                                                                                                                 |
| N | Q2G0Q0 | DR | glutamine metabolic process                                                                                                                                                                                              |
| N | Q2G0Q0 | DR | transferase activity                                                                                                                                                                                                     |

|   |        |    |                                                                                                                                                                                                                                                                                                                |
|---|--------|----|----------------------------------------------------------------------------------------------------------------------------------------------------------------------------------------------------------------------------------------------------------------------------------------------------------------|
| N | Q2G7S5 | CC | Catalyzes the formation of the alpha-1,6-glucosidic linkages in glycogen by scission of a 1,4-alpha-linked oligosaccharide from growing alpha-1,4-glucan chains and the subsequent attachment of the oligosaccharide to the alpha-1,6 position (By similarity)                                                 |
| N | Q2G7S5 | DE | 1,4-alpha-D-glucan:1,4-alpha-D-glucan 6-glucosyl-transferase;                                                                                                                                                                                                                                                  |
| N | Q2G7S5 | DE | 1,4-alpha-glucan-branching enzyme;                                                                                                                                                                                                                                                                             |
| N | Q2G7S5 | DE | Glycogen-branching enzyme;                                                                                                                                                                                                                                                                                     |
| N | Q2G7S5 | DR | 1,4-alpha-glucan branching enzyme activity                                                                                                                                                                                                                                                                     |
| N | Q2G7S5 | DR | cation binding                                                                                                                                                                                                                                                                                                 |
| N | Q2G7S5 | DR | glycogen biosynthetic process                                                                                                                                                                                                                                                                                  |
| N | Q2G7S5 | DR | hydrolase activity, hydrolyzing O-glycosyl compounds                                                                                                                                                                                                                                                           |
| N | Q2GE40 | CC | Catalyzes the attachment of proline to tRNA(Pro) in a two-step reaction: proline is first activated by ATP to form Pro- AMP and then transferred to the acceptor end of tRNA(Pro) (By similarity).                                                                                                             |
| N | Q2GE40 | DE | Proline--tRNA ligase;                                                                                                                                                                                                                                                                                          |
| N | Q2GE40 | DE | Prolyl-tRNA synthetase;                                                                                                                                                                                                                                                                                        |
| N | Q2GE40 | DR | proline-tRNA ligase activity                                                                                                                                                                                                                                                                                   |
| N | Q2GE40 | DR | prolyl-tRNA aminoacylation                                                                                                                                                                                                                                                                                     |
| N | Q2GEF4 | DE | Phosphatidylserine decarboxylase alpha chain;                                                                                                                                                                                                                                                                  |
| N | Q2GEF4 | DE | Phosphatidylserine decarboxylase beta chain;                                                                                                                                                                                                                                                                   |
| N | Q2GEF4 | DE | Phosphatidylserine decarboxylase proenzyme;                                                                                                                                                                                                                                                                    |
| N | Q2GEF4 | DR | cofactor binding                                                                                                                                                                                                                                                                                               |
| N | Q2GEF4 | DR | phosphatidylethanolamine biosynthetic process                                                                                                                                                                                                                                                                  |
| N | Q2GEF4 | DR | phosphatidylserine decarboxylase activity                                                                                                                                                                                                                                                                      |
| N | Q2GFV4 | CC | This protein is involved in the repair of mismatches in DNA                                                                                                                                                                                                                                                    |
| N | Q2GFV4 | CC | It is required for dam-dependent methyl-directed DNA mismatch repair. May act as a 'molecular matchmaker', a protein that promotes the formation of a stable complex between two or more DNA-binding proteins in an ATP-dependent manner without itself being part of a final effector complex (By similarity) |
| N | Q2GFV4 | CC | DNA mismatch repair protein mutL;                                                                                                                                                                                                                                                                              |
| N | Q2GFV4 | DE | mismatch repair                                                                                                                                                                                                                                                                                                |
| N | Q2GFV4 | DR | mismatched DNA binding                                                                                                                                                                                                                                                                                         |
| N | Q2GJF3 | DE | 50S ribosomal protein L33;                                                                                                                                                                                                                                                                                     |
| N | Q2GJF3 | DR | structural constituent of ribosome                                                                                                                                                                                                                                                                             |
| N | Q2GLH3 | CC | Interconversion of serine and glycine.                                                                                                                                                                                                                                                                         |
| N | Q2GLH3 | DE | Serine hydroxymethyltransferase;                                                                                                                                                                                                                                                                               |
| N | Q2GLH3 | DE | Serine methylase;                                                                                                                                                                                                                                                                                              |
| N | Q2GLH3 | DR | L-serine metabolic process                                                                                                                                                                                                                                                                                     |
| N | Q2GLH3 | DR | glycine hydroxymethyltransferase activity                                                                                                                                                                                                                                                                      |
| N | Q2GLH3 | DR | glycine metabolic process                                                                                                                                                                                                                                                                                      |
| N | Q2GLH3 | DR | one-carbon metabolic process                                                                                                                                                                                                                                                                                   |
| N | Q2GLH3 | DR | pyridoxal phosphate binding                                                                                                                                                                                                                                                                                    |
| N | Q2HDP2 | CC | Catalyzes the synthesis of dihydrouridine, a modified base found in the D-loop of most tRNAs                                                                                                                                                                                                                   |
| N | Q2HDP2 | CC | Specifically modifies U47 in cytoplasmic tRNAs (By similarity).                                                                                                                                                                                                                                                |
| N | Q2HDP2 | DE | tRNA-dihydrouridine synthase 3;                                                                                                                                                                                                                                                                                |
| N | Q2HDP2 | DR | flavin adenine dinucleotide binding                                                                                                                                                                                                                                                                            |
| N | Q2HDP2 | DR | metal ion binding                                                                                                                                                                                                                                                                                              |
| N | Q2HDP2 | DR | oxidation-reduction process                                                                                                                                                                                                                                                                                    |
| N | Q2HDP2 | DR | tRNA dihydrouridine synthase activity                                                                                                                                                                                                                                                                          |
| N | Q2HDP2 | DR | tRNA processing                                                                                                                                                                                                                                                                                                |
| N | Q2HE94 | CC | Component of the eukaryotic translation initiation factor 3 (eIF-3) complex, which is involved in protein synthesis and, together with other initiation factors, stimulates binding of mRNA and methionyl-tRNAi to the 40S ribosome (By similarity)                                                            |
| N | Q2HE94 | DE | Eukaryotic translation initiation factor 3 subunit M;                                                                                                                                                                                                                                                          |
| N | Q2HE94 | DR | translation initiation factor activity                                                                                                                                                                                                                                                                         |
| N | Q2HJH3 | CC | EXHIBITS ESTER HYDROLASE ACTIVITY ON THE SUBSTRATE p- MUPROPHENYL ACETATE (By similarity)                                                                                                                                                                                                                      |
| N | Q2HJH3 | DE | Ester hydrolase C11orf54 homolog;                                                                                                                                                                                                                                                                              |
| N | Q2HJH3 | DR | hydrolase activity, acting on ester bonds                                                                                                                                                                                                                                                                      |
| N | Q2HJH3 | DR | zinc ion binding                                                                                                                                                                                                                                                                                               |
| N | Q2IHV2 | CC | Catalyzes the oxidation of either pyridoxine 5'-phosphate (PNP) or pyridoxamine 5'-phosphate (PMP) into pyridoxal 5'-phosphate (PLP) (By similarity)                                                                                                                                                           |
| N | Q2IHV2 | DE | PNP/PMP oxidase;                                                                                                                                                                                                                                                                                               |
| N | Q2IHV2 | DE | Pyridoxal 5'-phosphate synthase;                                                                                                                                                                                                                                                                               |
| N | Q2IHV2 | DE | Pyridoxine/pyridoxamine 5'-phosphate oxidase;                                                                                                                                                                                                                                                                  |
| N | Q2IHV2 | DR | oxidation-reduction process                                                                                                                                                                                                                                                                                    |

|   |        |    |                                                                                                                                                                                                                                         |
|---|--------|----|-----------------------------------------------------------------------------------------------------------------------------------------------------------------------------------------------------------------------------------------|
| N | Q2IHV2 | DR | pyridoxamine-phosphate oxidase activity                                                                                                                                                                                                 |
| N | Q2IHV2 | DR | pyridoxine biosynthetic process                                                                                                                                                                                                         |
| N | Q2IL06 | CC | NDH-1 shuttles electrons from NADH, via FMN and iron- sulfur (Fe-S) centers, to quinones in the respiratory chain                                                                                                                       |
| N | Q2IL06 | CC | Couples the redox reaction to proton translocation (for every two electrons transferred, four hydrogen ions are translocated across the cytoplasmic membrane), and thus conserves the redox energy in a proton gradient (By similarity) |
| N | Q2IL06 | CC | The immediate electron acceptor for the enzyme in this species is believed to be ubiquinone                                                                                                                                             |
| N | Q2IL06 | DE | NADH dehydrogenase I subunit D 1;                                                                                                                                                                                                       |
| N | Q2IL06 | DE | NADH-quinone oxidoreductase subunit D 1;                                                                                                                                                                                                |
| N | Q2IL06 | DE | NDH-1 subunit D 1;                                                                                                                                                                                                                      |
| N | Q2IL06 | DR | NADH dehydrogenase (quinone) activity                                                                                                                                                                                                   |
| N | Q2IL06 | DR | oxidation-reduction process                                                                                                                                                                                                             |
| N | Q2IL06 | DR | quinone binding                                                                                                                                                                                                                         |
| N | Q2INW2 | DE | 1-(5-phosphoribosyl)-5-[(5-phosphoribosylamino)methylideneamino] imidazole-4-carboxamide isomerase;                                                                                                                                     |
| N | Q2INW2 | DE | Phosphoribosylformimino-5-aminoimidazole carboxamide ribotide isomerase;                                                                                                                                                                |
| N | Q2INW2 | DR | 1-(5-phosphoribosyl)-5-[(5-phosphoribosylamino)methylideneamino]imidazole-4-carboxamide isomerase activity                                                                                                                              |
| N | Q2INW2 | DR | histidine biosynthetic process                                                                                                                                                                                                          |
| N | Q2ISF7 | CC | This is one of the proteins that binds to the 5S RNA in the ribosome where it forms part of the central protuberance (By similarity).                                                                                                   |
| N | Q2ISF7 | DE | 50S ribosomal protein L25;                                                                                                                                                                                                              |
| N | Q2ISF7 | DE | General stress protein CTC;                                                                                                                                                                                                             |
| N | Q2ISF7 | DR | 5S rRNA binding                                                                                                                                                                                                                         |
| N | Q2ISF7 | DR | structural constituent of ribosome                                                                                                                                                                                                      |
| N | Q2IUB0 | DE | UPF0260 protein RPB_3505;                                                                                                                                                                                                               |
| N | Q2IUG5 | CC | Heme chaperone required for the biogenesis of c-type cytochromes                                                                                                                                                                        |
| N | Q2IUG5 | CC | Transiently binds heme delivered by CcmC and transfers the heme to apo-cytochromes in a process facilitated by CcmF and CcmH (By similarity).                                                                                           |
| N | Q2IUG5 | DE | Cytochrome c maturation protein E;                                                                                                                                                                                                      |
| N | Q2IUG5 | DE | Cytochrome c-type biogenesis protein CcmE;                                                                                                                                                                                              |
| N | Q2IUG5 | DE | Heme chaperone CcmE;                                                                                                                                                                                                                    |
| N | Q2IUG5 | DR | cytochrome complex assembly                                                                                                                                                                                                             |
| N | Q2IUG5 | DR | metal ion binding                                                                                                                                                                                                                       |
| N | Q2IUG5 | DR | protein-heme linkage                                                                                                                                                                                                                    |
| N | Q2J2D8 | CC | Catalyzes the dephosphorylation of undecaprenyl diphosphate (UPP)                                                                                                                                                                       |
| N | Q2J2D8 | CC | Confers resistance to bacitracin (By similarity).                                                                                                                                                                                       |
| N | Q2J2D8 | DE | Bacitracin resistance protein;                                                                                                                                                                                                          |
| N | Q2J2D8 | DE | Undecaprenyl pyrophosphate phosphatase;                                                                                                                                                                                                 |
| N | Q2J2D8 | DE | Undecaprenyl-diphosphatase;                                                                                                                                                                                                             |
| N | Q2J2D8 | DR | cellular cell wall organization                                                                                                                                                                                                         |
| N | Q2J2D8 | DR | dephosphorylation                                                                                                                                                                                                                       |
| N | Q2J2D8 | DR | peptidoglycan biosynthetic process                                                                                                                                                                                                      |
| N | Q2J2D8 | DR | regulation of cell shape                                                                                                                                                                                                                |
| N | Q2J2D8 | DR | response to antibiotic                                                                                                                                                                                                                  |
| N | Q2J2D8 | DR | undecaprenyl-diphosphatase activity                                                                                                                                                                                                     |
| N | Q2J734 | CC | One of the primary rRNA binding proteins, it binds directly to 16S rRNA where it helps nucleate assembly of the platform of the 30S subunit by binding and bridging several RNA helices of the 16S rRNA (By similarity).                |
| N | Q2J734 | DE | 30S ribosomal protein S15;                                                                                                                                                                                                              |
| N | Q2J734 | DR | structural constituent of ribosome                                                                                                                                                                                                      |
| N | Q2JFG6 | CC | Binds to 23S rRNA                                                                                                                                                                                                                       |
| N | Q2JFG6 | CC | Forms part of two intersubunit bridges in the 70S ribosome (By similarity).                                                                                                                                                             |
| N | Q2JFG6 | DE | 50S ribosomal protein L14;                                                                                                                                                                                                              |
| N | Q2JFG6 | DR | structural constituent of ribosome                                                                                                                                                                                                      |
| N | Q2JIL0 | CC | Binds to the 23S rRNA (By similarity).                                                                                                                                                                                                  |
| N | Q2JIL0 | DE | 50S ribosomal protein L15;                                                                                                                                                                                                              |
| N | Q2JIL0 | DR | structural constituent of ribosome                                                                                                                                                                                                      |
| N | Q2JJ68 | CC | NDH-1 shuttles electrons from an unknown electron donor, via FMN and iron-sulfur (Fe-S) centers, to quinones in the respiratory and/or the photosynthetic chain                                                                         |
| N | Q2JJ68 | CC | Couples the redox reaction to proton translocation, and thus conserves the redox energy in a proton gradient                                                                                                                            |

|   |        |    |                                                                                                                                                                                                                                   |
|---|--------|----|-----------------------------------------------------------------------------------------------------------------------------------------------------------------------------------------------------------------------------------|
| N | Q2JJ68 | CC | Cyanobacterial NDH-1 also plays a role in inorganic carbon- concentration (By similarity).                                                                                                                                        |
| N | Q2JJ68 | CC | The immediate electron acceptor for the enzyme in this species is believed to be plastoquinone                                                                                                                                    |
| N | Q2JJ68 | DE | NAD(P)H dehydrogenase I subunit L;                                                                                                                                                                                                |
| N | Q2JJ68 | DE | NAD(P)H-quinone oxidoreductase subunit L;                                                                                                                                                                                         |
| N | Q2JJ68 | DE | NDH-1 subunit L;                                                                                                                                                                                                                  |
| N | Q2JJ68 | DR | oxidation-reduction process                                                                                                                                                                                                       |
| N | Q2JJ68 | DR | oxidoreductase activity, acting on NADH or NADPH, quinone or similar compound as acceptor                                                                                                                                         |
| N | Q2JJ68 | DR | quinone binding                                                                                                                                                                                                                   |
| N | Q2JJR4 | CC | Cell wall formation                                                                                                                                                                                                               |
| N | Q2JJR4 | CC | Catalyzes the transfer of a GlcNAc subunit on undecaprenyl-pyrophosphoryl-MurNAc-pentapeptide (lipid intermediate I) to form undecaprenyl-pyrophosphoryl-MurNAc- (pentapeptide)GlcNAc (lipid intermediate II) (By similarity)     |
| N | Q2JJR4 | DE | UDP-N-acetylglucosamine--N-acetylmuramyl-(pentapeptide) pyrophosphoryl-undecaprenol N-acetylglucosamine transferase;                                                                                                              |
| N | Q2JJR4 | DE | Undecaprenyl-PP-MurNAc-pentapeptide-UDPGlcNAc GlcNAc transferase;                                                                                                                                                                 |
| N | Q2JJR4 | DR | UDP-N-acetyl-D-glucosamine:N-acetylmuramoyl-L-alanyl-D-glutamyl-meso-2,6-diaminopimelyl-D-alanyl-D-alanine-diphosphoundecaprenol 4-beta-N-acetylglucosaminyltransferase activity                                                  |
| N | Q2JJR4 | DR | UDP-N-acetylglactosamine biosynthetic process                                                                                                                                                                                     |
| N | Q2JJR4 | DR | carbohydrate binding                                                                                                                                                                                                              |
| N | Q2JJR4 | DR | cell division                                                                                                                                                                                                                     |
| N | Q2JJR4 | DR | cellular cell wall organization                                                                                                                                                                                                   |
| N | Q2JJR4 | DR | lipid glycosylation                                                                                                                                                                                                               |
| N | Q2JJR4 | DR | peptidoglycan biosynthetic process                                                                                                                                                                                                |
| N | Q2JJR4 | DR | regulation of cell shape                                                                                                                                                                                                          |
| N | Q2JJR4 | DR | undecaprenyldiphospho-muramoylpentapeptide beta-N-acetylglucosaminyltransferase activity                                                                                                                                          |
| N | Q2JMZ3 | CC | Functions in the N-end rule pathway of protein degradation where it conjugates Leu, Phe and, less efficiently, Met from aminoacyl-tRNAs to the N-termini of proteins containing an N-terminal arginine or lysine (By similarity). |
| N | Q2JMZ3 | DE | L/F-transferase;                                                                                                                                                                                                                  |
| N | Q2JMZ3 | DE | Leucyl/phenylalanyl-tRNA--protein transferase;                                                                                                                                                                                    |
| N | Q2JMZ3 | DE | Leucyltransferase;                                                                                                                                                                                                                |
| N | Q2JMZ3 | DE | Phenylalanyltransferase;                                                                                                                                                                                                          |
| N | Q2JMZ3 | DR | acyltransferase activity                                                                                                                                                                                                          |
| N | Q2JMZ3 | DR | leucyltransferase activity                                                                                                                                                                                                        |
| N | Q2JMZ3 | DR | protein catabolic process                                                                                                                                                                                                         |
| N | Q2JNH4 | DE | Maf-like protein CYB_0709;                                                                                                                                                                                                        |
| N | Q2JQ65 | DE | Anthranilate phosphoribosyltransferase;                                                                                                                                                                                           |
| N | Q2JQ65 | DR | anthranilate phosphoribosyltransferase activity                                                                                                                                                                                   |
| N | Q2JQ65 | DR | tryptophan biosynthetic process                                                                                                                                                                                                   |
| N | Q2JR49 | CC | Binds directly to 23S ribosomal RNA and is necessary for the in vitro assembly process of the 50S ribosomal subunit                                                                                                               |
| N | Q2JR49 | CC | It is not involved in the protein synthesizing functions of that subunit (By similarity)                                                                                                                                          |
| N | Q2JR49 | DE | 50S ribosomal protein L20;                                                                                                                                                                                                        |
| N | Q2JR49 | DR | structural constituent of ribosome                                                                                                                                                                                                |
| N | Q2JTW6 | CC | Catalyzes the decarboxylation of orotidine 5'- monophosphate (OMP) to uridine 5'-monophosphate (UMP) (By similarity).                                                                                                             |
| N | Q2JTW6 | DE | OMP decarboxylase;                                                                                                                                                                                                                |
| N | Q2JTW6 | DE | Orotidine 5'-phosphate decarboxylase;                                                                                                                                                                                             |
| N | Q2JTW6 | DR | 'de novo' UMP biosynthetic process                                                                                                                                                                                                |
| N | Q2JTW6 | DR | 'de novo' pyrimidine base biosynthetic process                                                                                                                                                                                    |
| N | Q2JTW6 | DR | orotidine-5'-phosphate decarboxylase activity                                                                                                                                                                                     |
| N | Q2JV84 | CC | One of the primary rRNA binding proteins                                                                                                                                                                                          |
| N | Q2JV84 | CC | It has been suggested to have peptidyltransferase activity; this is somewhat controversial                                                                                                                                        |
| N | Q2JV84 | CC | Makes several contacts with the 16S rRNA in the 70S ribosome (By similarity).                                                                                                                                                     |
| N | Q2JV84 | CC | Required for association of the 30S and 50S subunits to form the 70S ribosome, for tRNA binding and peptide bond formation                                                                                                        |
| N | Q2JV84 | DE | 50S ribosomal protein L2;                                                                                                                                                                                                         |
| N | Q2JV84 | DR | structural constituent of ribosome                                                                                                                                                                                                |
| N | Q2JV84 | DR | transferase activity                                                                                                                                                                                                              |
| N | Q2K2Y1 | CC | This protein binds to 23S rRNA in the presence of protein L20 (By similarity).                                                                                                                                                    |

|   |        |    |                                                                                                                                                                                                                       |
|---|--------|----|-----------------------------------------------------------------------------------------------------------------------------------------------------------------------------------------------------------------------|
| N | Q2K2Y1 | DE | 50S ribosomal protein L21;                                                                                                                                                                                            |
| N | Q2K2Y1 | DR | structural constituent of ribosome                                                                                                                                                                                    |
| N | Q2K302 | CC | Involved in peptide bond synthesis probably functions indirectly by altering the affinity of the ribosome for aminoacyl-tRNA, thus increasing their reactivity as acceptors for peptidyl transferase (By similarity). |
| N | Q2K302 | CC | Stimulates efficient translation and peptide-bond synthesis on native or reconstituted 70S ribosomes in vitro                                                                                                         |
| N | Q2K302 | DE | Elongation factor P;                                                                                                                                                                                                  |
| N | Q2K302 | DR | peptide biosynthetic process                                                                                                                                                                                          |
| N | Q2K302 | DR | translation elongation factor activity                                                                                                                                                                                |
| N | Q2K433 | DE | Xylose isomerase;                                                                                                                                                                                                     |
| N | Q2K433 | DR | D-xylose metabolic process                                                                                                                                                                                            |
| N | Q2K433 | DR | metal ion binding                                                                                                                                                                                                     |
| N | Q2K433 | DR | pentose-phosphate shunt                                                                                                                                                                                               |
| N | Q2K433 | DR | xylose isomerase activity                                                                                                                                                                                             |
| N | Q2K4E6 | DE | TPR repeat-containing protein RHE_CH03534.1;                                                                                                                                                                          |
| N | Q2K7G6 | CC | Catalyzes the synthesis of alpha-ribazole-5'-phosphate from nicotinate mononucleotide (NAMN) and 5,6- dimethylbenzimidazole (DMB).                                                                                    |
| N | Q2K7G6 | DE | N(1)-alpha-phosphoribosyltransferase;                                                                                                                                                                                 |
| N | Q2K7G6 | DE | NN:DBI PRT;                                                                                                                                                                                                           |
| N | Q2K7G6 | DE | Nicotinate-nucleotide--dimethylbenzimidazole phosphoribosyltransferase;                                                                                                                                               |
| N | Q2K7G6 | DR | cobalamin biosynthetic process                                                                                                                                                                                        |
| N | Q2K7G6 | DR | nicotinate-nucleotide-dimethylbenzimidazole phosphoribosyltransferase activity                                                                                                                                        |
| N | Q2K7G6 | DR | nucleoside biosynthetic process                                                                                                                                                                                       |
| N | Q2K9W4 | DE | 30S ribosomal protein S9;                                                                                                                                                                                             |
| N | Q2K9W4 | DR | structural constituent of ribosome                                                                                                                                                                                    |
| N | Q2KA54 | CC | The UvrABC repair system catalyzes the recognition and processing of DNA lesions. The N-terminal half is responsible for the 3' incision and the C-terminal half is responsible for the 5' incision (By similarity).  |
| N | Q2KA54 | CC | UvrC both incises the 5' and 3' sides of the lesion                                                                                                                                                                   |
| N | Q2KA54 | DE | Excinuclease ABC subunit C;                                                                                                                                                                                           |
| N | Q2KA54 | DE | Protein uvrC;                                                                                                                                                                                                         |
| N | Q2KA54 | DE | UvrABC system protein C;                                                                                                                                                                                              |
| N | Q2KA54 | DR | excinuclease ABC activity                                                                                                                                                                                             |
| N | Q2KA54 | DR | nucleotide-excision repair                                                                                                                                                                                            |
| N | Q2KCH7 | CC | Putative member of a two-component regulatory system.                                                                                                                                                                 |
| N | Q2KCH7 | DE | Probable chemotaxis protein CheY;                                                                                                                                                                                     |
| N | Q2KCH7 | DR | regulation of transcription, DNA-dependent                                                                                                                                                                            |
| N | Q2KCH7 | DR | two-component response regulator activity                                                                                                                                                                             |
| N | Q2KW23 | CC | No specific function has so far been attributed to this initiation factor; however, it seems to stimulate more or less all the activities of the other two initiation factors, IF 2 and IF 3.                         |
| N | Q2KW23 | DE | Translation initiation factor IF-1 2;                                                                                                                                                                                 |
| N | Q2KW23 | DR | translation initiation factor activity                                                                                                                                                                                |
| N | Q2KYQ6 | CC | Could be a mediator in iron transactions between iron acquisition and iron-requiring processes, such as synthesis and/or repair of Fe-S clusters in biosynthetic enzymes (By similarity).                             |
| N | Q2KYQ6 | DE | Probable Fe(2+)-trafficking protein;                                                                                                                                                                                  |
| N | Q2KYQ6 | DR | iron ion binding                                                                                                                                                                                                      |
| N | Q2L0A9 | CC | One of the proteins required for the normal export of preproteins out of the cell cytoplasm                                                                                                                           |
| N | Q2L0A9 | CC | It also specifically binds to its receptor secA (By similarity).                                                                                                                                                      |
| N | Q2L0A9 | CC | It is a molecular chaperone that binds to a subset of precursor proteins, maintaining them in a translocation-competent state                                                                                         |
| N | Q2L0A9 | DE | Protein-export protein secB;                                                                                                                                                                                          |
| N | Q2L0A9 | DR | protein tetramerization                                                                                                                                                                                               |
| N | Q2L0A9 | DR | protein transport                                                                                                                                                                                                     |
| N | Q2L0A9 | DR | transmembrane transport                                                                                                                                                                                               |
| N | Q2L0A9 | DR | unfolded protein binding                                                                                                                                                                                              |
| N | Q2L937 | DE | 30S ribosomal protein S11, chloroplastic;                                                                                                                                                                             |
| N | Q2L937 | DR | structural constituent of ribosome                                                                                                                                                                                    |
| N | Q2L957 | CC | NDH shuttles electrons from NAD(P)H:plastoquinone, via FMN and iron-sulfur (Fe-S) centers, to quinones in the photosynthetic chain and possibly in a chloroplast respiratory chain                                    |
| N | Q2L957 | CC | Couples the redox reaction to proton translocation, and thus conserves the redox energy in a proton gradient (By similarity).                                                                                         |

|   |        |    |                                                                                                                                                                                                                |
|---|--------|----|----------------------------------------------------------------------------------------------------------------------------------------------------------------------------------------------------------------|
| N | Q2L957 | CC | The immediate electron acceptor for the enzyme in this species is believed to be plastoquinone                                                                                                                 |
| N | Q2L957 | DE | NAD(P)H dehydrogenase subunit 4L;                                                                                                                                                                              |
| N | Q2L957 | DE | NAD(P)H-quinone oxidoreductase subunit 4L, chloroplastic;                                                                                                                                                      |
| N | Q2L957 | DE | NADH-plastoquinone oxidoreductase subunit 4L;                                                                                                                                                                  |
| N | Q2L957 | DR | ATP synthesis coupled electron transport                                                                                                                                                                       |
| N | Q2L957 | DR | oxidoreductase activity, acting on NADH or NADPH                                                                                                                                                               |
| N | Q2L957 | DR | quinone binding                                                                                                                                                                                                |
| N | Q2LR03 | CC | Necessary for efficient RNA polymerase transcription elongation past template-encoded arresting sites                                                                                                          |
| N | Q2LR03 | CC | Cleavage of the nascent transcript by cleavage factors such as greA or greB allows the resumption of elongation from the new 3'terminus                                                                        |
| N | Q2LR03 | CC | GreA releases sequences of 2 to 3 nucleotides (By similarity).                                                                                                                                                 |
| N | Q2LR03 | CC | The arresting sites in DNA have the property of trapping a certain fraction of elongating RNA polymerases that pass through, resulting in locked ternary complexes                                             |
| N | Q2LR03 | DE | Transcript cleavage factor greA;                                                                                                                                                                               |
| N | Q2LR03 | DE | Transcription elongation factor greA;                                                                                                                                                                          |
| N | Q2LR03 | DR | transcription elongation regulator activity                                                                                                                                                                    |
| N | Q2LUS9 | CC | Catalyzes the formation of 4-diphosphocytidyl-2-C- methyl-D-erythritol from CTP and 2-C-methyl-D-erythritol 4- phosphate (MEP) (By similarity).                                                                |
| N | Q2LUS9 | DE | 2-C-methyl-D-erythritol 4-phosphate cytidyltransferase;                                                                                                                                                        |
| N | Q2LUS9 | DE | 4-diphosphocytidyl-2C-methyl-D-erythritol synthase;                                                                                                                                                            |
| N | Q2LUS9 | DE | MEP cytidyltransferase;                                                                                                                                                                                        |
| N | Q2LUS9 | DR | 2-C-methyl-D-erythritol 4-phosphate cytidyltransferase activity                                                                                                                                                |
| N | Q2LUS9 | DR | isoprenoid biosynthetic process                                                                                                                                                                                |
| N | Q2LVI9 | DE | Glycine--tRNA ligase beta subunit;                                                                                                                                                                             |
| N | Q2LVI9 | DE | Glycyl-tRNA synthetase beta subunit;                                                                                                                                                                           |
| N | Q2LVI9 | DR | arginine-tRNA ligase activity                                                                                                                                                                                  |
| N | Q2LVI9 | DR | arginyl-tRNA aminoacylation                                                                                                                                                                                    |
| N | Q2LVI9 | DR | glycine-tRNA ligase activity                                                                                                                                                                                   |
| N | Q2LVI9 | DR | glycyl-tRNA aminoacylation                                                                                                                                                                                     |
| N | Q2LVL0 | CC | Involved in lipid A export and possibly also in glycerophospholipid export and for biogenesis of the outer membrane                                                                                            |
| N | Q2LVL0 | CC | Transmembrane domains (TMD) form a pore in the inner membrane and the ATP-binding domain (NBD) is responsible for energy generation (By similarity).                                                           |
| N | Q2LVL0 | DE | Lipid A export ATP-binding/permease protein MsbA;                                                                                                                                                              |
| N | Q2LVL0 | DR | ATPase activity, coupled to transmembrane movement of substances                                                                                                                                               |
| N | Q2LVL0 | DR | lipid transport                                                                                                                                                                                                |
| N | Q2LWC5 | CC | Increases the formation of ribosomal termination complexes and stimulates activities of RF-1 and RF-2                                                                                                          |
| N | Q2LWC5 | CC | It binds guanine nucleotides and has strong preference for UGA stop codons                                                                                                                                     |
| N | Q2LWC5 | CC | It may interact directly with the ribosome                                                                                                                                                                     |
| N | Q2LWC5 | CC | The stimulation of RF- 1 and RF-2 is significantly reduced by GTP and GDP, but not by GMP (By similarity).                                                                                                     |
| N | Q2LWC5 | DE | Peptide chain release factor 3;                                                                                                                                                                                |
| N | Q2LWC5 | DR | GTPase activity                                                                                                                                                                                                |
| N | Q2LWC5 | DR | translation release factor activity, codon specific                                                                                                                                                            |
| N | Q2M389 | CC | Component of the WASH complex, a complex present at the surface of endosomes that recruits and activates the Arp2/3 complex to induce actin polymerization                                                     |
| N | Q2M389 | CC | The WASH complex plays a key role in the fission of tubules that serve as transport intermediates during endosome sorting (By similarity).                                                                     |
| N | Q2M389 | DE | WASH complex subunit 7;                                                                                                                                                                                        |
| N | Q2M389 | DR | endosome transport                                                                                                                                                                                             |
| N | Q2MI88 | CC | May be involved in proton extrusion                                                                                                                                                                            |
| N | Q2MI88 | CC | Indirectly promotes efficient inorganic carbon uptake into chloroplasts (By similarity)                                                                                                                        |
| N | Q2MI88 | DE | Chloroplast envelope membrane protein;                                                                                                                                                                         |
| N | Q2MI88 | DR | proton transport                                                                                                                                                                                               |
| N | Q2MI91 | CC | Component of the acetyl coenzyme A carboxylase (ACC) complex                                                                                                                                                   |
| N | Q2MI91 | CC | Biotin carboxylase (BC) catalyzes the carboxylation of biotin on its carrier protein (BCCP) and then the CO(2) group is transferred by the transcarboxylase to acetyl-CoA to form malonyl- CoA (By similarity) |
| N | Q2MI91 | CC | is up-regulated upon chloroplast differentiation, presumably for fatty acid biosynthesis                                                                                                                       |
| N | Q2MI91 | DE | ACCase subunit beta;                                                                                                                                                                                           |
| N | Q2MI91 | DE | Acetyl-CoA carboxylase carboxyltransferase subunit beta;                                                                                                                                                       |
| N | Q2MI91 | DE | Acetyl-coenzyme A carboxylase carboxyl transferase subunit beta, chloroplastic;                                                                                                                                |

|   |        |    |                                                                                                                                                                                                                                            |
|---|--------|----|--------------------------------------------------------------------------------------------------------------------------------------------------------------------------------------------------------------------------------------------|
| N | Q2MI91 | DR | acetyl-CoA carboxylase activity                                                                                                                                                                                                            |
| N | Q2MI91 | DR | fatty acid biosynthetic process                                                                                                                                                                                                            |
| N | Q2MI91 | DR | metal ion binding                                                                                                                                                                                                                          |
| N | Q2MIK8 | CC | With S4 and S5 plays an important role in translational accuracy                                                                                                                                                                           |
| N | Q2MIK8 | CC | Located at the interface of the 30S and 50S subunits (By similarity).                                                                                                                                                                      |
| N | Q2MIK8 | DE | 30S ribosomal protein S12, chloroplastic;                                                                                                                                                                                                  |
| N | Q2MIK8 | DR | structural constituent of ribosome                                                                                                                                                                                                         |
| N | Q2N5Q5 | CC | DNA-dependent RNA polymerase catalyzes the transcription of DNA into RNA using the four ribonucleoside triphosphates as substrates (By similarity).                                                                                        |
| N | Q2N5Q5 | DE | DNA-directed RNA polymerase subunit beta';                                                                                                                                                                                                 |
| N | Q2N5Q5 | DE | RNA polymerase subunit beta';                                                                                                                                                                                                              |
| N | Q2N5Q5 | DE | RNAP subunit beta';                                                                                                                                                                                                                        |
| N | Q2N5Q5 | DE | Transcriptase subunit beta';                                                                                                                                                                                                               |
| N | Q2N5Q5 | DR | DNA-directed RNA polymerase activity                                                                                                                                                                                                       |
| N | Q2N659 | CC | Catalyzes the condensation of pantoate with beta-alanine in an ATP-dependent reaction via a pantoyl-adenylate intermediate (By similarity).                                                                                                |
| N | Q2N659 | DE | Pantoate--beta-alanine ligase;                                                                                                                                                                                                             |
| N | Q2N659 | DE | Pantoate-activating enzyme;                                                                                                                                                                                                                |
| N | Q2N659 | DE | Pantothenate synthetase;                                                                                                                                                                                                                   |
| N | Q2N659 | DR | pantoate-beta-alanine ligase activity                                                                                                                                                                                                      |
| N | Q2N659 | DR | pantothenate biosynthetic process                                                                                                                                                                                                          |
| N | Q2N9B2 | CC | One of the primary rRNA binding proteins, this protein initially binds near the 5'-end of the 23S rRNA                                                                                                                                     |
| N | Q2N9B2 | CC | It is important during the early stages of 50S assembly                                                                                                                                                                                    |
| N | Q2N9B2 | CC | It makes multiple contacts with different domains of the 23S rRNA in the assembled 50S subunit and ribosome (By similarity).                                                                                                               |
| N | Q2N9B2 | DE | 50S ribosomal protein L4;                                                                                                                                                                                                                  |
| N | Q2N9B2 | DR | structural constituent of ribosome                                                                                                                                                                                                         |
| N | Q2NF86 | CC | Produces ATP from ADP in the presence of a proton gradient across the membrane                                                                                                                                                             |
| N | Q2NF86 | DE | V-ATPase subunit F;                                                                                                                                                                                                                        |
| N | Q2NF86 | DE | V-type ATP synthase subunit F;                                                                                                                                                                                                             |
| N | Q2NF86 | DR | ATP biosynthetic process                                                                                                                                                                                                                   |
| N | Q2NF86 | DR | ATP hydrolysis coupled proton transport                                                                                                                                                                                                    |
| N | Q2NF86 | DR | hydrogen ion transporting ATP synthase activity, rotational mechanism                                                                                                                                                                      |
| N | Q2NF86 | DR | proton-transporting ATPase activity, rotational mechanism                                                                                                                                                                                  |
| N | Q2NHU7 | DE | UPF0219 protein Msp_0117;                                                                                                                                                                                                                  |
| N | Q2NHU7 | DR | hydroxymethylglutaryl-CoA synthase activity                                                                                                                                                                                                |
| N | Q2NHU7 | DR | isoprenoid biosynthetic process                                                                                                                                                                                                            |
| N | Q2NHU7 | DR | transferase activity, transferring acyl groups other than amino-acyl groups required for the formation of a threonylcarbamoyl group on adenosine at position 37 (t(6)A37) in tRNAs that read codons beginning with adenine (By similarity) |
| N | Q2NIA4 | CC | Probable bifunctional tRNA threonylcarbamoyladenine biosynthesis protein; produces tRNA threonylcarbamoyladenine biosynthesis protein KAE1 homolog                                                                                         |
| N | Q2NIA4 | DE | Probable bifunctional tRNA threonylcarbamoyladenine biosynthesis protein; produces tRNA threonylcarbamoyladenine biosynthesis protein KAE1 homolog                                                                                         |
| N | Q2NIA4 | DE | Probable serine/threonine-protein kinase BUD32 homolog; produces tRNA threonylcarbamoyladenine biosynthesis protein KAE1 homolog                                                                                                           |
| N | Q2NIA4 | DE | t(6)A37 threonylcarbamoyladenine biosynthesis protein KAE1 homolog;                                                                                                                                                                        |
| N | Q2NIA4 | DR | metalloendopeptidase activity                                                                                                                                                                                                              |
| N | Q2NIA4 | DR | protein phosphorylation                                                                                                                                                                                                                    |
| N | Q2NIA4 | DR | protein tyrosine kinase activity                                                                                                                                                                                                           |
| N | Q2NIA4 | DR | zinc ion binding                                                                                                                                                                                                                           |
| N | Q2NIN4 | CC | Ligates lysine onto the cytidine present at position 34 of the AUA codon-specific tRNA(Ile) that contains the anticodon CAU, in an ATP-dependent manner                                                                                    |
| N | Q2NIN4 | CC | Cytidine is converted to lysidine, thus changing the amino acid specificity of the tRNA from methionine to isoleucine (By similarity).                                                                                                     |
| N | Q2NIN4 | DE | tRNA(Ile)-2-lysyl-cytidine synthase;                                                                                                                                                                                                       |
| N | Q2NIN4 | DE | tRNA(Ile)-lysidine synthase;                                                                                                                                                                                                               |
| N | Q2NIN4 | DE | tRNA(Ile)-lysidine synthetase;                                                                                                                                                                                                             |
| N | Q2NIN4 | DR | ligase activity, forming carbon-nitrogen bonds                                                                                                                                                                                             |
| N | Q2NIN4 | DR | tRNA processing                                                                                                                                                                                                                            |
| N | Q2NTA8 | CC | Provides the D-alanine required for cell wall biosynthesis (By similarity).                                                                                                                                                                |
| N | Q2NTA8 | DE | Alanine racemase;                                                                                                                                                                                                                          |
| N | Q2NTA8 | DR | alanine metabolic process                                                                                                                                                                                                                  |
| N | Q2NTA8 | DR | alanine racemase activity                                                                                                                                                                                                                  |
| N | Q2NTA8 | DR | cellular cell wall organization                                                                                                                                                                                                            |
| N | Q2NTA8 | DR | peptidoglycan biosynthetic process                                                                                                                                                                                                         |
| N | Q2NTA8 | DR | regulation of cell shape                                                                                                                                                                                                                   |



|   |        |    |                                                                                                                                                                                                                  |
|---|--------|----|------------------------------------------------------------------------------------------------------------------------------------------------------------------------------------------------------------------|
| N | Q2NW08 | CC | Increases the formation of ribosomal termination complexes and stimulates activities of RF-1 and RF-2                                                                                                            |
| N | Q2NW08 | CC | It binds guanine nucleotides and has strong preference for UGA stop codons                                                                                                                                       |
| N | Q2NW08 | CC | It may interact directly with the ribosome                                                                                                                                                                       |
| N | Q2NW08 | CC | The stimulation of RF- 1 and RF-2 is significantly reduced by GTP and GDP, but not by GMP (By similarity).                                                                                                       |
| N | Q2NW08 | DE | Peptide chain release factor 3;                                                                                                                                                                                  |
| N | Q2NW08 | DR | GTPase activity                                                                                                                                                                                                  |
| N | Q2NW08 | DR | translation release factor activity, codon specific                                                                                                                                                              |
| N | Q2NY86 | DE | UPF0391 membrane protein XOO3986;                                                                                                                                                                                |
| N | Q2P5W1 | DE | Aspartate carbamoyltransferase;                                                                                                                                                                                  |
| N | Q2P5W1 | DE | Aspartate transcarbamylase;                                                                                                                                                                                      |
| N | Q2P5W1 | DR | 'de novo' pyrimidine base biosynthetic process                                                                                                                                                                   |
| N | Q2P5W1 | DR | amino acid binding                                                                                                                                                                                               |
| N | Q2P5W1 | DR | aspartate carbamoyltransferase activity                                                                                                                                                                          |
| N | Q2P5W1 | DR | cellular amino acid metabolic process                                                                                                                                                                            |
| N | Q2P5W1 | DR | pyrimidine nucleotide biosynthetic process                                                                                                                                                                       |
| N | Q2P6P9 | DE | Phosphoriboisomerase A;                                                                                                                                                                                          |
| N | Q2P6P9 | DE | Ribose-5-phosphate isomerase A;                                                                                                                                                                                  |
| N | Q2P6P9 | DR | pentose-phosphate shunt, non-oxidative branch                                                                                                                                                                    |
| N | Q2P6P9 | DR | ribose-5-phosphate isomerase activity                                                                                                                                                                            |
| N | Q2P7Q7 | CC | F(1)F(0) ATP synthase produces ATP from ADP in the presence of a proton or sodium gradient                                                                                                                       |
| N | Q2P7Q7 | CC | During catalysis, ATP synthesis in the catalytic domain of F(1) is coupled via a rotary mechanism of the central stalk subunits to proton translocation (By similarity)                                          |
| N | Q2P7Q7 | CC | F-type ATPases consist of two structural domains, F(1) containing the extramembraneous catalytic core and F(0) containing the membrane proton channel, linked together by a central stalk and a peripheral stalk |
| N | Q2P7Q7 | DE | ATP synthase F(1) sector subunit delta;                                                                                                                                                                          |
| N | Q2P7Q7 | DE | ATP synthase subunit delta;                                                                                                                                                                                      |
| N | Q2P7Q7 | DE | F-ATPase subunit delta;                                                                                                                                                                                          |
| N | Q2P7Q7 | DE | F-type ATPase subunit delta;                                                                                                                                                                                     |
| N | Q2P7Q7 | DR | ATP synthesis coupled proton transport                                                                                                                                                                           |
| N | Q2P7Q7 | DR | hydrogen ion transporting ATP synthase activity, rotational mechanism                                                                                                                                            |
| N | Q2PMN2 | DE | NAD(P)H dehydrogenase, chain 4;                                                                                                                                                                                  |
| N | Q2PMN2 | DE | NAD(P)H-quinone oxidoreductase chain 4, chloroplastic;                                                                                                                                                           |
| N | Q2PMN2 | DE | NADH-plastoquinone oxidoreductase chain 4;                                                                                                                                                                       |
| N | Q2PMN2 | DR | ATP synthesis coupled electron transport                                                                                                                                                                         |
| N | Q2PMN2 | DR | NADH dehydrogenase (ubiquinone) activity                                                                                                                                                                         |
| N | Q2PMN2 | DR | quinone binding                                                                                                                                                                                                  |
| N | Q2QD64 | CC | Cleaves peptides in various proteins in a process that requires ATP hydrolysis                                                                                                                                   |
| N | Q2QD64 | CC | Has a chymotrypsin-like activity                                                                                                                                                                                 |
| N | Q2QD64 | CC | Plays a major role in the degradation of misfolded proteins (By similarity).                                                                                                                                     |
| N | Q2QD64 | DE | ATP-dependent Clp protease proteolytic subunit;                                                                                                                                                                  |
| N | Q2QD64 | DE | Endopeptidase Clp;                                                                                                                                                                                               |
| N | Q2QD64 | DR | serine-type endopeptidase activity                                                                                                                                                                               |
| N | Q2QLG6 | CC | Involved in the costimulatory signal essential for T- cell receptor (TCR)-mediated T-cell activation                                                                                                             |
| N | Q2QLG6 | CC | Forms a stable heterooligomeric complex with CAV2 that targets to lipid rafts and drives caveolae formation                                                                                                      |
| N | Q2QLG6 | CC | Interacts directly with G- protein alpha subunits and can functionally regulate their activity                                                                                                                   |
| N | Q2QLG6 | CC | Its binding to DPP4 induces T-cell proliferation and NF-kappa-B activation in a T-cell receptor/CD3-dependent manner                                                                                             |
| N | Q2QLG6 | CC | May act as a scaffolding protein within caveolar membranes                                                                                                                                                       |
| N | Q2QLG6 | CC | Recruits CTNNB1 to caveolar membranes and may regulate CTNNB1-mediated signaling through the Wnt pathway (By similarity).                                                                                        |
| N | Q2QLG6 | DR | T cell costimulation                                                                                                                                                                                             |
| N | Q2R483 | DE | 2,3-diketo-5-methylthio-1-phosphopentane phosphatase;                                                                                                                                                            |
| N | Q2R483 | DE | Enolase-phosphatase E1;                                                                                                                                                                                          |
| N | Q2R483 | DE | MTRu-1-P dehydratase;                                                                                                                                                                                            |
| N | Q2R483 | DE | Methylthioribulose-1-phosphate dehydratase;                                                                                                                                                                      |
| N | Q2R483 | DE | Probable bifunctional methylthioribulose-1-phosphate dehydratase/enolase-phosphatase E1;                                                                                                                         |
| N | Q2R483 | DR | L-methionine salvage from methylthioadenosine                                                                                                                                                                    |

|   |        |    |                                                                                                                                                                                                                                                                       |
|---|--------|----|-----------------------------------------------------------------------------------------------------------------------------------------------------------------------------------------------------------------------------------------------------------------------|
| N | Q2R483 | DR | acireductone synthase activity                                                                                                                                                                                                                                        |
| N | Q2R483 | DR | metal ion binding                                                                                                                                                                                                                                                     |
| N | Q2R483 | DR | methylthioribulose 1-phosphate dehydratase activity                                                                                                                                                                                                                   |
| N | Q2R483 | DR | phosphoglycolate phosphatase activity                                                                                                                                                                                                                                 |
| N | Q2RHM6 | CC | Catalyzes the radical-mediated insertion of two sulfur atoms into the C-6 and C-8 positions of the octanoyl moiety bound to the lipoyl domains of lipoate-dependent enzymes, thereby converting the octanoylated domains into lipoylated derivatives (By similarity). |
| N | Q2RHM6 | DE | Lipoate synthase;                                                                                                                                                                                                                                                     |
| N | Q2RHM6 | DE | Lipoic acid synthase;                                                                                                                                                                                                                                                 |
| N | Q2RHM6 | DE | Lipoyl synthase;                                                                                                                                                                                                                                                      |
| N | Q2RHM6 | DE | Sulfur insertion protein lipA;                                                                                                                                                                                                                                        |
| N | Q2RHM6 | DR | 4 iron, 4 sulfur cluster binding                                                                                                                                                                                                                                      |
| N | Q2RHM6 | DR | lipoate biosynthetic process                                                                                                                                                                                                                                          |
| N | Q2RHM6 | DR | lipoate synthase activity                                                                                                                                                                                                                                             |
| N | Q2RHM6 | DR | metal ion binding                                                                                                                                                                                                                                                     |
| N | Q2RHR4 | CC | Catalyzes the synthesis of the hydroxymethylpyrimidine phosphate (HMP-P) moiety of thiamine from aminoimidazole ribotide (AIR) in a radical S-adenosyl-L-methionine (SAM)-dependent reaction (By similarity).                                                         |
| N | Q2RHR4 | DE | HMP-P synthase 3;                                                                                                                                                                                                                                                     |
| N | Q2RHR4 | DE | HMP-phosphate synthase 3;                                                                                                                                                                                                                                             |
| N | Q2RHR4 | DE | HMPP synthase 3;                                                                                                                                                                                                                                                      |
| N | Q2RHR4 | DE | Hydroxymethylpyrimidine phosphate synthase 3;                                                                                                                                                                                                                         |
| N | Q2RHR4 | DE | Phosphomethylpyrimidine synthase 3;                                                                                                                                                                                                                                   |
| N | Q2RHR4 | DE | Thiamine biosynthesis protein thiC 3;                                                                                                                                                                                                                                 |
| N | Q2RHR4 | DR | 4 iron, 4 sulfur cluster binding                                                                                                                                                                                                                                      |
| N | Q2RHR4 | DR | lyase activity                                                                                                                                                                                                                                                        |
| N | Q2RHR4 | DR | metal ion binding                                                                                                                                                                                                                                                     |
| N | Q2RHR4 | DR | thiamine biosynthetic process                                                                                                                                                                                                                                         |
| N | Q2RP10 | DE | Acetylglutamate kinase;                                                                                                                                                                                                                                               |
| N | Q2RP10 | DE | N-acetyl-L-glutamate 5-phosphotransferase;                                                                                                                                                                                                                            |
| N | Q2RP10 | DR | acetylglutamate kinase activity                                                                                                                                                                                                                                       |
| N | Q2RP10 | DR | arginine biosynthetic process                                                                                                                                                                                                                                         |
| N | Q2RP10 | DR | glutamate 5-kinase activity                                                                                                                                                                                                                                           |
| N | Q2RP10 | DR | proline biosynthetic process                                                                                                                                                                                                                                          |
| N | Q2RQV5 | CC | With S4 and S5 plays an important role in translational accuracy (By similarity).                                                                                                                                                                                     |
| N | Q2RQV5 | DE | 30S ribosomal protein S12;                                                                                                                                                                                                                                            |
| N | Q2RQV5 | DR | structural constituent of ribosome                                                                                                                                                                                                                                    |
| N | Q2RQW2 | CC | One of the early assembly proteins it binds 23S rRNA                                                                                                                                                                                                                  |
| N | Q2RQW2 | CC | forms the main docking site for trigger factor binding to the ribosome (By similarity)                                                                                                                                                                                |
| N | Q2RQW2 | CC | One of the proteins that surrounds the polypeptide exit tunnel on the outside of the ribosome                                                                                                                                                                         |
| N | Q2RQW2 | DE | 50S ribosomal protein L23;                                                                                                                                                                                                                                            |
| N | Q2RQW2 | DR | nucleotide binding                                                                                                                                                                                                                                                    |
| N | Q2RQW2 | DR | structural constituent of ribosome                                                                                                                                                                                                                                    |
| N | Q2RS50 | CC | Synthesizes alpha-1,4-glucan chains using ADP-glucose.                                                                                                                                                                                                                |
| N | Q2RS50 | DE | Glycogen synthase;                                                                                                                                                                                                                                                    |
| N | Q2RS50 | DE | Starch [bacterial glycogen] synthase;                                                                                                                                                                                                                                 |
| N | Q2RS50 | DR | glycogen biosynthetic process                                                                                                                                                                                                                                         |
| N | Q2RS50 | DR | starch synthase activity                                                                                                                                                                                                                                              |
| N | Q2RS75 | CC | The UvrABC repair system catalyzes the recognition and processing of DNA lesions                                                                                                                                                                                      |
| N | Q2RS75 | CC | The N-terminal half is responsible for the 3' incision and the C-terminal half is responsible for the 5' incision (By similarity).                                                                                                                                    |
| N | Q2RS75 | CC | UvrC both incises the 5' and 3' sides of the lesion                                                                                                                                                                                                                   |
| N | Q2RS75 | DE | Excinuclease ABC subunit C;                                                                                                                                                                                                                                           |
| N | Q2RS75 | DE | Protein uvrC;                                                                                                                                                                                                                                                         |
| N | Q2RS75 | DE | UvrABC system protein C;                                                                                                                                                                                                                                              |
| N | Q2RS75 | DR | excinuclease ABC activity                                                                                                                                                                                                                                             |
| N | Q2RS75 | DR | nucleotide-excision repair                                                                                                                                                                                                                                            |
| N | Q2RTE2 | CC | Catalyzes the dephosphorylation of undecaprenyl diphosphate (UPP)                                                                                                                                                                                                     |
| N | Q2RTE2 | CC | Confers resistance to bacitracin (By similarity).                                                                                                                                                                                                                     |
| N | Q2RTE2 | DE | Bacitracin resistance protein 2;                                                                                                                                                                                                                                      |
| N | Q2RTE2 | DE | Undecaprenyl pyrophosphate phosphatase 2;                                                                                                                                                                                                                             |
| N | Q2RTE2 | DE | Undecaprenyl-diphosphatase 2;                                                                                                                                                                                                                                         |
| N | Q2RTE2 | DR | cellular cell wall organization                                                                                                                                                                                                                                       |

|   |        |    |                                                                                                                                                |
|---|--------|----|------------------------------------------------------------------------------------------------------------------------------------------------|
| N | Q2RTE2 | DR | dephosphorylation                                                                                                                              |
| N | Q2RTE2 | DR | peptidoglycan biosynthetic process                                                                                                             |
| N | Q2RTE2 | DR | regulation of cell shape                                                                                                                       |
| N | Q2RTE2 | DR | response to antibiotic                                                                                                                         |
| N | Q2RTE2 | DR | undecaprenyl-diphosphatase activity                                                                                                            |
| N | Q2RWE3 | DE | Histidine--tRNA ligase;                                                                                                                        |
| N | Q2RWE3 | DE | Histidyl-tRNA synthetase;                                                                                                                      |
| N | Q2RWE3 | DR | histidine-tRNA ligase activity                                                                                                                 |
| N | Q2RWE3 | DR | histidyl-tRNA aminoacylation                                                                                                                   |
| N | Q2S1Q6 | CC | DNA-dependent RNA polymerase catalyzes the transcription of DNA into RNA using the four ribonucleoside triphosphates as substrates.            |
| N | Q2S1Q6 | DE | DNA-directed RNA polymerase subunit beta';                                                                                                     |
| N | Q2S1Q6 | DE | RNA polymerase subunit beta';                                                                                                                  |
| N | Q2S1Q6 | DE | RNAP subunit beta';                                                                                                                            |
| N | Q2S1Q6 | DE | Transcriptase subunit beta';                                                                                                                   |
| N | Q2S1Q6 | DR | DNA-directed RNA polymerase activity                                                                                                           |
| N | Q2S919 | CC | Binds 23S rRNA and is also seen to make contacts with the A and possibly P site tRNAs (By similarity).                                         |
| N | Q2S919 | DE | 50S ribosomal protein L16;                                                                                                                     |
| N | Q2S919 | DR | structural constituent of ribosome                                                                                                             |
| N | Q2SJB9 | DE | Protein CrcB homolog;                                                                                                                          |
| N | Q2SMB5 | DE | Imidazoleglycerol-phosphate dehydratase;                                                                                                       |
| N | Q2SMB5 | DR | histidine biosynthetic process                                                                                                                 |
| N | Q2SMB5 | DR | imidazoleglycerol-phosphate dehydratase activity                                                                                               |
| N | Q2SML5 | CC | Required for maturation of 30S ribosomal subunits (By similarity).                                                                             |
| N | Q2SML5 | DE | Ribosome maturation factor rimP;                                                                                                               |
| N | Q2SML5 | DR | ribosome biogenesis                                                                                                                            |
| N | Q2ST53 | CC | This protein binds directly to 23S ribosomal RNA (By similarity).                                                                              |
| N | Q2ST53 | DE | 50S ribosomal protein L11;                                                                                                                     |
| N | Q2ST53 | DR | structural constituent of ribosome                                                                                                             |
| N | Q2SU20 | CC | DNA-dependent RNA polymerase catalyzes the transcription of DNA into RNA using the four ribonucleoside triphosphates as substrates.            |
| N | Q2SU20 | DE | DNA-directed RNA polymerase subunit beta';                                                                                                     |
| N | Q2SU20 | DE | RNA polymerase subunit beta';                                                                                                                  |
| N | Q2SU20 | DE | RNAP subunit beta';                                                                                                                            |
| N | Q2SU20 | DE | Transcriptase subunit beta';                                                                                                                   |
| N | Q2SU20 | DR | DNA-directed RNA polymerase activity                                                                                                           |
| N | Q2SWZ7 | CC | Associates with the EF-Tu.GDP complex and induces the exchange of GDP to GTP                                                                   |
| N | Q2SWZ7 | CC | It remains bound to the aminoacyl-tRNA.EF- Tu.GTP complex up to the GTP hydrolysis stage on the ribosome.                                      |
| N | Q2SWZ7 | DE | Elongation factor Ts;                                                                                                                          |
| N | Q2SWZ7 | DR | translation elongation factor activity                                                                                                         |
| N | Q2SYJ5 | CC | Prevents misfolding and promotes the refolding and proper assembly of unfolded polypeptides generated under stress conditions (By similarity). |
| N | Q2SYJ5 | DE | 60 kDa chaperonin 1;                                                                                                                           |
| N | Q2SYJ5 | DE | GroEL protein 1;                                                                                                                               |
| N | Q2SYJ5 | DE | Protein Cpn60 1;                                                                                                                               |
| N | Q2SYJ5 | DR | protein refolding                                                                                                                              |
| N | Q2SYS4 | CC | Interconversion of serine and glycine.                                                                                                         |
| N | Q2SYS4 | DE | Serine hydroxymethyltransferase 1;                                                                                                             |
| N | Q2SYS4 | DE | Serine methylase 1;                                                                                                                            |
| N | Q2SYS4 | DR | L-serine metabolic process                                                                                                                     |
| N | Q2SYS4 | DR | glycine hydroxymethyltransferase activity                                                                                                      |
| N | Q2SYS4 | DR | glycine metabolic process                                                                                                                      |
| N | Q2SYS4 | DR | one-carbon metabolic process                                                                                                                   |
| N | Q2SYS4 | DR | pyridoxal phosphate binding                                                                                                                    |
| N | Q2T096 | CC | Catalyzes the pyruvoyl-dependent decarboxylation of aspartate to produce beta-alanine (By similarity).                                         |
| N | Q2T096 | DE | Aspartate 1-decarboxylase alpha chain;                                                                                                         |
| N | Q2T096 | DE | Aspartate 1-decarboxylase beta chain;                                                                                                          |
| N | Q2T096 | DE | Aspartate 1-decarboxylase;                                                                                                                     |
| N | Q2T096 | DE | Aspartate alpha-decarboxylase;                                                                                                                 |
| N | Q2T096 | DR | alanine biosynthetic process                                                                                                                   |
| N | Q2T096 | DR | aspartate 1-decarboxylase activity                                                                                                             |
| N | Q2T096 | DR | pantothenate biosynthetic process                                                                                                              |

|   |        |    |                                                                                                                                                                                                                                                  |
|---|--------|----|--------------------------------------------------------------------------------------------------------------------------------------------------------------------------------------------------------------------------------------------------|
| N | Q2T8T6 | CC | Part of the ABC transporter complex RbsABCD involved in ribose import                                                                                                                                                                            |
| N | Q2T8T6 | CC | Responsible for energy coupling to the transport system (By similarity).                                                                                                                                                                         |
| N | Q2T8T6 | DE | Ribose import ATP-binding protein RbsA 2;                                                                                                                                                                                                        |
| N | Q2T8T6 | DR | monosaccharide-transporting ATPase activity                                                                                                                                                                                                      |
| N | Q2TA14 | CC | Cleaves C-terminal amino acids linked to proline in peptides such as angiotensin II, III and des-Arg9-bradykinin                                                                                                                                 |
| N | Q2TA14 | CC | This cleavage occurs at acidic pH, but enzymatic activity is retained with some substrates at neutral pH (By similarity).                                                                                                                        |
| N | Q2TA14 | DE | Lysosomal Pro-X carboxypeptidase;                                                                                                                                                                                                                |
| N | Q2TA14 | DE | Proline carboxypeptidase;                                                                                                                                                                                                                        |
| N | Q2TA14 | DE | Prolylcarboxypeptidase;                                                                                                                                                                                                                          |
| N | Q2TA14 | DR | carboxypeptidase activity                                                                                                                                                                                                                        |
| N | Q2TA14 | DR | serine-type peptidase activity                                                                                                                                                                                                                   |
| N | Q2U561 | CC | plays a role in maintenance of chromatin structure during RNA polymerase II transcription elongation thereby repressing transcription initiation from cryptic promoters                                                                          |
| N | Q2U561 | CC | Mediates the reassembly of nucleosomes onto the promoters of at least a selected set of genes during repression; the nucleosome reassembly is essential for transcriptional repression (By similarity).                                          |
| N | Q2U561 | DE | Chromatin elongation factor spt6;                                                                                                                                                                                                                |
| N | Q2U561 | DE | Transcription elongation factor spt6;                                                                                                                                                                                                            |
| N | Q2U561 | DR | regulation of transcription from RNA polymerase II promoter                                                                                                                                                                                      |
| N | Q2U561 | DR | transcription elongation regulator activity                                                                                                                                                                                                      |
| N | Q2U9E7 | CC | Component of the Mediator complex, a coactivator involved in the regulated transcription of nearly all RNA polymerase II-dependent genes                                                                                                         |
| N | Q2U9E7 | CC | Mediator functions as a bridge to convey information from gene-specific regulatory proteins to the basal RNA polymerase II transcription machinery                                                                                               |
| N | Q2U9E7 | CC | Mediator is recruited to promoters by direct interactions with regulatory proteins and serves as a scaffold for the assembly of a functional preinitiation complex with RNA polymerase II and the general transcription factors (By similarity). |
| N | Q2U9E7 | DE | Mediator complex subunit 6;                                                                                                                                                                                                                      |
| N | Q2U9E7 | DE | Mediator of RNA polymerase II transcription subunit 6;                                                                                                                                                                                           |
| N | Q2U9E7 | DR | RNA polymerase II transcription mediator activity                                                                                                                                                                                                |
| N | Q2U9E7 | DR | regulation of transcription from RNA polymerase II promoter                                                                                                                                                                                      |
| N | Q2UKT0 | CC | ATPase required for the post-translational delivery of tail-anchored (TA) proteins to the endoplasmic reticulum                                                                                                                                  |
| N | Q2UKT0 | CC | ATP binding drives the homodimer towards the closed dimer state, facilitating recognition of newly synthesized TA membrane proteins                                                                                                              |
| N | Q2UKT0 | CC | ATP hydrolysis is required for insertion                                                                                                                                                                                                         |
| N | Q2UKT0 | CC | Recognizes and selectively binds the transmembrane domain of TA proteins in the cytosol                                                                                                                                                          |
| N | Q2UKT0 | CC | Subsequently, the homodimer reverts towards the open dimer state, lowering its affinity for the membrane-bound receptor, and returning it to the cytosol to initiate a new round of targeting (By similarity).                                   |
| N | Q2UKT0 | CC | This complex then targets to the endoplasmic reticulum by membrane-bound receptors, where the tail-anchored protein is released for insertion                                                                                                    |
| N | Q2UKT0 | CC | This process is regulated by ATP binding and hydrolysis                                                                                                                                                                                          |
| N | Q2UKT0 | DE | ATPase get3;                                                                                                                                                                                                                                     |
| N | Q2UKT0 | DE | Arsenical pump-driving ATPase;                                                                                                                                                                                                                   |
| N | Q2UKT0 | DE | Arsenite-stimulated ATPase;                                                                                                                                                                                                                      |
| N | Q2UKT0 | DE | Golgi to ER traffic protein 3;                                                                                                                                                                                                                   |
| N | Q2UKT0 | DE | Guided entry of tail-anchored proteins 3;                                                                                                                                                                                                        |
| N | Q2UKT0 | DR | cellular metal ion homeostasis                                                                                                                                                                                                                   |
| N | Q2UKT0 | DR | hydrolase activity                                                                                                                                                                                                                               |
| N | Q2UKT0 | DR | metal ion binding                                                                                                                                                                                                                                |
| N | Q2UMX6 | CC | Involved in degradation of plant cell walls                                                                                                                                                                                                      |
| N | Q2UMX6 | CC | Hydrolyzes of the feruloyl-arabinose ester bond in arabinoxylans as well as the feruloyl-galactose and feruloyl-arabinose ester bonds in pectin (By similarity).                                                                                 |
| N | Q2UMX6 | DE | Ferulic acid esterase B-2;                                                                                                                                                                                                                       |
| N | Q2UMX6 | DE | Probable feruloyl esterase B-2;                                                                                                                                                                                                                  |
| N | Q2UMX6 | DR | feruloyl esterase activity                                                                                                                                                                                                                       |
| N | Q2UMX6 | DR | xylan catabolic process                                                                                                                                                                                                                          |
| N | Q2UTN6 | CC | Histone methyltransferase that methylates histone H3 to form H3K36me involved in transcription elongation as well as in transcription repression (By similarity)                                                                                 |
| N | Q2UTN6 | CC |                                                                                                                                                                                                                                                  |
| N | Q2UTN6 | DE | Histone-lysine N-methyltransferase, H3 lysine-36 specific;                                                                                                                                                                                       |
| N | Q2UTN6 | DE | SET domain-containing protein 2;                                                                                                                                                                                                                 |

|   |        |    |                                                                                                                                                                                                                                         |
|---|--------|----|-----------------------------------------------------------------------------------------------------------------------------------------------------------------------------------------------------------------------------------------|
| N | Q2UTN6 | DR | histone-lysine N-methyltransferase activity                                                                                                                                                                                             |
| N | Q2UTN6 | DR | regulation of transcription, DNA-dependent                                                                                                                                                                                              |
| N | Q2V460 | DE | Putative defensin-like protein 39;                                                                                                                                                                                                      |
| N | Q2V460 | DR | defense response to fungus                                                                                                                                                                                                              |
| N | Q2V460 | DR | killing of cells of other organism                                                                                                                                                                                                      |
| N | Q2VEH9 | CC | Controls the interaction of photosystem II (PSII) cores with the light-harvesting antenna (By similarity).                                                                                                                              |
| N | Q2VEH9 | DE | Photosystem II reaction center protein Z;                                                                                                                                                                                               |
| N | Q2VEH9 | DR | photosynthesis                                                                                                                                                                                                                          |
| N | Q2VEH9 | DR | photosystem II stabilization                                                                                                                                                                                                            |
| N | Q2VPM4 | CC | Transcriptional corepressor which does not bind directly to DNA and may regulate transcription through recruitment of histone deacetylases to gene promoters                                                                            |
| N | Q2VPM4 | CC | May be required for segmental gene expression during hindbrain development (By similarity).                                                                                                                                             |
| N | Q2VPM4 | CC | Regulates cell adhesion, migration and proliferation                                                                                                                                                                                    |
| N | Q2VPM4 | DE | Zinc finger protein 703-B;                                                                                                                                                                                                              |
| N | Q2VPM4 | DR | adherens junction assembly                                                                                                                                                                                                              |
| N | Q2VPM4 | DR | negative regulation of homotypic cell-cell adhesion                                                                                                                                                                                     |
| N | Q2VPM4 | DR | nucleic acid binding                                                                                                                                                                                                                    |
| N | Q2VPM4 | DR | positive regulation of cell migration                                                                                                                                                                                                   |
| N | Q2VPM4 | DR | regulation of canonical Wnt receptor signaling pathway                                                                                                                                                                                  |
| N | Q2VPM4 | DR | regulation of cell cycle                                                                                                                                                                                                                |
| N | Q2VPM4 | DR | regulation of transforming growth factor beta receptor signaling pathway                                                                                                                                                                |
| N | Q2VPM4 | DR | specific transcriptional repressor activity                                                                                                                                                                                             |
| N | Q2VPM4 | DR | zinc ion binding                                                                                                                                                                                                                        |
| N | Q2VZN3 | CC | Produces ATP from ADP in the presence of a proton gradient across the membrane                                                                                                                                                          |
| N | Q2VZN3 | DE | ATP synthase F1 sector epsilon subunit;                                                                                                                                                                                                 |
| N | Q2VZN3 | DE | ATP synthase epsilon chain;                                                                                                                                                                                                             |
| N | Q2VZN3 | DE | F-ATPase epsilon subunit;                                                                                                                                                                                                               |
| N | Q2VZN3 | DR | ATP synthesis coupled proton transport                                                                                                                                                                                                  |
| N | Q2VZN3 | DR | hydrogen ion transporting ATP synthase activity, rotational mechanism                                                                                                                                                                   |
| N | Q2VZN3 | DR | proton-transporting ATPase activity, rotational mechanism                                                                                                                                                                               |
| N | Q2W000 | CC | Catalyzes the ATP-dependent conversion of 7-carboxy-7- deazaguanine (CDG) to 7-cyano-7-deazaguanine (preQ(0)) (By similarity).                                                                                                          |
| N | Q2W000 | DE | 7-cyano-7-carbaguanine synthase;                                                                                                                                                                                                        |
| N | Q2W000 | DE | 7-cyano-7-deazaguanine synthase;                                                                                                                                                                                                        |
| N | Q2W000 | DE | PreQ(0) synthase;                                                                                                                                                                                                                       |
| N | Q2W000 | DE | Queuosine biosynthesis protein queC;                                                                                                                                                                                                    |
| N | Q2W000 | DR | ligase activity                                                                                                                                                                                                                         |
| N | Q2W000 | DR | metal ion binding                                                                                                                                                                                                                       |
| N | Q2W000 | DR | queuosine biosynthetic process                                                                                                                                                                                                          |
| N | Q2XXP2 | CC | Blocks ryanodine receptors, and potassium channels (By similarity).                                                                                                                                                                     |
| N | Q2XXP2 | DE | CRISP-VAR10;                                                                                                                                                                                                                            |
| N | Q2XXP2 | DE | Cysteine-rich secretory protein VAR10;                                                                                                                                                                                                  |
| N | Q2XXP2 | DE | DE Flags: Precursor; Fragment;                                                                                                                                                                                                          |
| N | Q2XXP2 | DR | calcium channel inhibitor activity                                                                                                                                                                                                      |
| N | Q2XXP2 | DR | potassium channel inhibitor activity                                                                                                                                                                                                    |
| N | Q2Y8G6 | CC | Key component of the proton channel; it plays a direct role in the translocation of protons across the membrane (By similarity).                                                                                                        |
| N | Q2Y8G6 | DE | ATP synthase F0 sector subunit a;                                                                                                                                                                                                       |
| N | Q2Y8G6 | DE | ATP synthase subunit a;                                                                                                                                                                                                                 |
| N | Q2Y8G6 | DE | F-ATPase subunit 6;                                                                                                                                                                                                                     |
| N | Q2Y8G6 | DR | ATP synthesis coupled proton transport                                                                                                                                                                                                  |
| N | Q2Y8G6 | DR | hydrogen ion transmembrane transporter activity                                                                                                                                                                                         |
| N | Q2Y8V8 | DE | UPF0061 protein Nmul_A1510;                                                                                                                                                                                                             |
| N | Q2YAA4 | CC | NDH-1 shuttles electrons from NADH, via FMN and iron- sulfur (Fe-S) centers, to quinones in the respiratory chain                                                                                                                       |
| N | Q2YAA4 | CC | Couples the redox reaction to proton translocation (for every two electrons transferred, four hydrogen ions are translocated across the cytoplasmic membrane), and thus conserves the redox energy in a proton gradient (By similarity) |
| N | Q2YAA4 | CC | The immediate electron acceptor for the enzyme in this species is believed to be ubiquinone                                                                                                                                             |
| N | Q2YAA4 | DE | NADH dehydrogenase I subunit B 1;                                                                                                                                                                                                       |
| N | Q2YAA4 | DE | NADH-quinone oxidoreductase subunit B 1;                                                                                                                                                                                                |
| N | Q2YAA4 | DE | NDH-1 subunit B 1;                                                                                                                                                                                                                      |

|   |        |    |                                                                                                                                                                                                                                              |
|---|--------|----|----------------------------------------------------------------------------------------------------------------------------------------------------------------------------------------------------------------------------------------------|
| N | Q2YAA4 | DR | 4 iron, 4 sulfur cluster binding                                                                                                                                                                                                             |
| N | Q2YAA4 | DR | NADH dehydrogenase (ubiquinone) activity                                                                                                                                                                                                     |
| N | Q2YAA4 | DR | metal ion binding                                                                                                                                                                                                                            |
| N | Q2YAA4 | DR | oxidation-reduction process                                                                                                                                                                                                                  |
| N | Q2YAA4 | DR | quinone binding                                                                                                                                                                                                                              |
| N | Q2YD57 | CC | Negatively regulates transcription of bacterial ribonucleotide reductase nrd genes and operons by binding to NrdR- boxes (By similarity).                                                                                                    |
| N | Q2YD57 | DE | Transcriptional repressor NrdR;                                                                                                                                                                                                              |
| N | Q2YD57 | DR | transcription repressor activity                                                                                                                                                                                                             |
| N | Q2YD57 | DR | zinc ion binding                                                                                                                                                                                                                             |
| N | Q2YDF6 | DE | 28S ribosomal protein S28, mitochondrial;                                                                                                                                                                                                    |
| N | Q2YDF6 | DE | 28S ribosomal protein S35, mitochondrial;                                                                                                                                                                                                    |
| N | Q2YDJ4 | CC | Hydrolyzes phosphoramidate and acyl-adenylate substrates.                                                                                                                                                                                    |
| N | Q2YDJ4 | DE | Histidine triad nucleotide-binding protein 3;                                                                                                                                                                                                |
| N | Q2YDJ4 | DR | hydrolase activity                                                                                                                                                                                                                           |
| N | Q2YHT5 | DE | CD200 cell surface glycoprotein receptor 1-B;                                                                                                                                                                                                |
| N | Q2YHT5 | DE | Cell surface glycoprotein CD200 receptor 1-B;                                                                                                                                                                                                |
| N | Q2YHT5 | DE | Cell surface glycoprotein OX2 receptor 1-B;                                                                                                                                                                                                  |
| N | Q2YHT5 | DR | receptor activity                                                                                                                                                                                                                            |
| N | Q2YJQ3 | CC | mediates the free amino group of the aminoacyl moiety of methionyl-tRNA (Met-tRNA)                                                                                                                                                           |
| N | Q2YJQ3 | CC | The formyl group appears to play a dual role in the initiator identity of N-formylmethionyl-tRNA by: (I) promoting its recognition by IF2 and (II) impairing its binding to EFTu-GTP (By similarity).                                        |
| N | Q2YJQ3 | DE | Methionyl-tRNA formyltransferase;                                                                                                                                                                                                            |
| N | Q2YJQ3 | DR | methionyl-tRNA formyltransferase activity                                                                                                                                                                                                    |
| N | Q2YJQ3 | DR | methyltransferase activity                                                                                                                                                                                                                   |
| N | Q2YKK2 | CC | Catalyzes the last two sequential reactions in the de novo biosynthetic pathway for UDP-GlcNAc                                                                                                                                               |
| N | Q2YKK2 | CC | responsible for the acetylation of Glc-N-1-P to give GlcNAc-1-P and for the uridyl transfer from UTP to GlcNAc-1-P which produces UDP-GlcNAc (By similarity)                                                                                 |
| N | Q2YKK2 | DE | Bifunctional protein glmU;                                                                                                                                                                                                                   |
| N | Q2YKK2 | DE | Glucosamine-1-phosphate N-acetyltransferase;                                                                                                                                                                                                 |
| N | Q2YKK2 | DE | N-acetylglucosamine-1-phosphate uridyltransferase;                                                                                                                                                                                           |
| N | Q2YKK2 | DE | UDP-N-acetylglucosamine pyrophosphorylase;                                                                                                                                                                                                   |
| N | Q2YKK2 | DR | UDP-N-acetylglucosamine diphosphorylase activity                                                                                                                                                                                             |
| N | Q2YKK2 | DR | cell morphogenesis                                                                                                                                                                                                                           |
| N | Q2YKK2 | DR | cellular cell wall organization                                                                                                                                                                                                              |
| N | Q2YKK2 | DR | glucosamine-1-phosphate N-acetyltransferase activity                                                                                                                                                                                         |
| N | Q2YKK2 | DR | lipopolysaccharide biosynthetic process                                                                                                                                                                                                      |
| N | Q2YKK2 | DR | magnesium ion binding                                                                                                                                                                                                                        |
| N | Q2YKK2 | DR | peptidoglycan biosynthetic process                                                                                                                                                                                                           |
| N | Q2YKK2 | DR | regulation of cell shape                                                                                                                                                                                                                     |
| N | Q2YKL4 | CC | Allows the formation of correctly charged Asn-tRNA(Asn) or Gln-tRNA(Gln) through the transamidation of misacylated Asp- tRNA(Asn) or Glu-tRNA(Gln) in organisms which lack either or both of asparaginyl-tRNA or glutaminyl-tRNA synthetases |
| N | Q2YKL4 | CC | The reaction takes place in the presence of glutamine and ATP through an activated phospho-Asp-tRNA(Asn) or phospho-Glu-tRNA(Gln) (By similarity).                                                                                           |
| N | Q2YKL4 | DE | Asp/Glu-ADT subunit C;                                                                                                                                                                                                                       |
| N | Q2YKL4 | DE | Aspartyl/glutamyl-tRNA(Asn/Gln) amidotransferase subunit C;                                                                                                                                                                                  |
| N | Q2YKL4 | DR | ligase activity                                                                                                                                                                                                                              |
| N | Q2YKL4 | DR | regulation of translational fidelity                                                                                                                                                                                                         |
| N | Q2YLH0 | DE | AICAR transformylase;                                                                                                                                                                                                                        |
| N | Q2YLH0 | DE | Bifunctional purine biosynthesis protein purH;                                                                                                                                                                                               |
| N | Q2YLH0 | DE | IMP cyclohydrolase;                                                                                                                                                                                                                          |
| N | Q2YLH0 | DE | IMP synthase;                                                                                                                                                                                                                                |
| N | Q2YLH0 | DE | Inosinase;                                                                                                                                                                                                                                   |
| N | Q2YLH0 | DE | Phosphoribosylaminoimidazolecarboxamide formyltransferase;                                                                                                                                                                                   |
| N | Q2YLH0 | DR | IMP biosynthetic process                                                                                                                                                                                                                     |
| N | Q2YLH0 | DR | IMP cyclohydrolase activity                                                                                                                                                                                                                  |
| N | Q2YLH0 | DR | phosphoribosylaminoimidazolecarboxamide formyltransferase activity                                                                                                                                                                           |
| N | Q2YLM3 | CC | Catalyzes the transfer of a phosphate group to glutamate to form glutamate 5-phosphate which rapidly cyclizes to 5- oxoproline.                                                                                                              |
| N | Q2YLM3 | DE | Gamma-glutamyl kinase;                                                                                                                                                                                                                       |
| N | Q2YLM3 | DE | Glutamate 5-kinase;                                                                                                                                                                                                                          |
| N | Q2YLM3 | DR | glutamate 5-kinase activity                                                                                                                                                                                                                  |

|   |        |    |                                                                                                                                                                                                                                                     |
|---|--------|----|-----------------------------------------------------------------------------------------------------------------------------------------------------------------------------------------------------------------------------------------------------|
| N | Q2YLM3 | DR | proline biosynthetic process                                                                                                                                                                                                                        |
| N | Q2YLS2 | CC | The 2-oxoglutarate dehydrogenase complex catalyzes the overall conversion of 2-oxoglutarate to succinyl-CoA and CO(2)                                                                                                                               |
| N | Q2YLS2 | CC | It contains multiple copies of three enzymatic components: 2- oxoglutarate dehydrogenase (E1), dihydrolipoamide succinyltransferase (E2) and lipoamide dehydrogenase (E3) (By similarity).                                                          |
| N | Q2YLS2 | DE | 2-oxoglutarate dehydrogenase E1 component;                                                                                                                                                                                                          |
| N | Q2YLS2 | DE | Alpha-ketoglutarate dehydrogenase;                                                                                                                                                                                                                  |
| N | Q2YLS2 | DR | oxidation-reduction process                                                                                                                                                                                                                         |
| N | Q2YLS2 | DR | oxoglutarate dehydrogenase (succinyl-transferring) activity                                                                                                                                                                                         |
| N | Q2YLS2 | DR | thiamine pyrophosphate binding                                                                                                                                                                                                                      |
| N | Q2YNJ9 | DE | Arginine--tRNA ligase;                                                                                                                                                                                                                              |
| N | Q2YNJ9 | DE | Arginyl-tRNA synthetase;                                                                                                                                                                                                                            |
| N | Q2YNJ9 | DR | arginine-tRNA ligase activity                                                                                                                                                                                                                       |
| N | Q2YNJ9 | DR | arginyl-tRNA aminoacylation                                                                                                                                                                                                                         |
| N | Q2YQY9 | DE | 1-(5-phosphoribosyl)-5-[(5-phosphoribosylamino)methylideneamino] imidazole-4-carboxamide isomerase;                                                                                                                                                 |
| N | Q2YQY9 | DE | Phosphoribosylformimino-5-aminoimidazole carboxamide ribotide isomerase;                                                                                                                                                                            |
| N | Q2YQY9 | DR | 1-(5-phosphoribosyl)-5-[(5-phosphoribosylamino)methylideneamino]imidazole-4-carboxamide isomerase activity                                                                                                                                          |
| N | Q2YQY9 | DR | histidine biosynthetic process                                                                                                                                                                                                                      |
| N | Q2YR96 | CC | Catalyzes the ATP-dependent conversion of 7-carboxy-7- deazaguanine (CDG) to 7-cyano-7-deazaguanine (preQ(0)) (By similarity).                                                                                                                      |
| N | Q2YR96 | DE | 7-cyano-7-carbaguanine synthase;                                                                                                                                                                                                                    |
| N | Q2YR96 | DE | 7-cyano-7-deazaguanine synthase;                                                                                                                                                                                                                    |
| N | Q2YR96 | DE | PreQ(0) synthase;                                                                                                                                                                                                                                   |
| N | Q2YR96 | DE | Queuosine biosynthesis protein queC;                                                                                                                                                                                                                |
| N | Q2YR96 | DR | ligase activity                                                                                                                                                                                                                                     |
| N | Q2YR96 | DR | metal ion binding                                                                                                                                                                                                                                   |
| N | Q2YR96 | DR | queuosine biosynthetic process                                                                                                                                                                                                                      |
| N | Q2YSD7 | DE | Putative ATP:guanido phosphotransferase SAB0474;                                                                                                                                                                                                    |
| N | Q2YSD7 | DR | kinase activity                                                                                                                                                                                                                                     |
| N | Q2YTA9 | CC | IF-3 binds to the 30S ribosomal subunit and shifts the equilibrium between 30S ribosomes and their 50S and 30S subunits in favor of the free subunits, thus enhancing the availability of 30S subunits on which protein synthesis initiation begins |
| N | Q2YTA9 | DE | Translation initiation factor IF-3;                                                                                                                                                                                                                 |
| N | Q2YTA9 | DR | translation initiation factor activity                                                                                                                                                                                                              |
| N | Q2YTB5 | CC | ATP-dependent specificity component of the Clp protease                                                                                                                                                                                             |
| N | Q2YTB5 | CC | Can perform chaperone functions in the absence of ClpP (By similarity).                                                                                                                                                                             |
| N | Q2YTB5 | CC | It directs the protease to specific substrates                                                                                                                                                                                                      |
| N | Q2YTB5 | DE | ATP-dependent Clp protease ATP-binding subunit ClpX;                                                                                                                                                                                                |
| N | Q2YTB5 | DR | ATPase activity                                                                                                                                                                                                                                     |
| N | Q2YTB5 | DR | protein dimerization activity                                                                                                                                                                                                                       |
| N | Q2YTB5 | DR | protein folding                                                                                                                                                                                                                                     |
| N | Q2YTB5 | DR | unfolded protein binding                                                                                                                                                                                                                            |
| N | Q2YTB5 | DR | zinc ion binding                                                                                                                                                                                                                                    |
| N | Q2YU22 | DE | Glutamate-1-semialdehyde 2,1-aminomutase 2;                                                                                                                                                                                                         |
| N | Q2YU22 | DE | Glutamate-1-semialdehyde aminotransferase 2;                                                                                                                                                                                                        |
| N | Q2YU22 | DR | glutamate-1-semialdehyde 2,1-aminomutase activity                                                                                                                                                                                                   |
| N | Q2YU22 | DR | porphyrin biosynthetic process                                                                                                                                                                                                                      |
| N | Q2YU22 | DR | pyridoxal phosphate binding                                                                                                                                                                                                                         |
| N | Q2YU22 | DR | transaminase activity                                                                                                                                                                                                                               |
| N | Q2YUH3 | DE | Probable DEAD-box ATP-dependent RNA helicase SAB1965c;                                                                                                                                                                                              |
| N | Q2YUH3 | DR | ATP-dependent helicase activity                                                                                                                                                                                                                     |
| N | Q2YW62 | CC | Promotes bacterial attachment to multiple substrates, such as fibronectin (Fn), fibrinogen (Fg), elastin peptides and tropoelastin                                                                                                                  |
| N | Q2YW62 | CC | Promotes adherence to and aggregation of activated platelets (By similarity).                                                                                                                                                                       |
| N | Q2YW62 | CC | This confers to S.aureus the ability to invade endothelial cells                                                                                                                                                                                    |
| N | Q2YW62 | DE | Fibronectin-binding protein A;                                                                                                                                                                                                                      |
| N | Q2YW62 | DR | cell adhesion                                                                                                                                                                                                                                       |
| N | Q2YXG5 | DE | Carbamoyl-phosphate synthase large chain;                                                                                                                                                                                                           |
| N | Q2YXG5 | DE | Carbamoyl-phosphate synthetase ammonia chain;                                                                                                                                                                                                       |
| N | Q2YXG5 | DR | arginine biosynthetic process                                                                                                                                                                                                                       |
| N | Q2YXG5 | DR | carbamoyl-phosphate synthase (glutamine-hydrolyzing) activity                                                                                                                                                                                       |
| N | Q2YXG5 | DR | metal ion binding                                                                                                                                                                                                                                   |

|   |        |    |                                                                                                                                                                                                                                              |
|---|--------|----|----------------------------------------------------------------------------------------------------------------------------------------------------------------------------------------------------------------------------------------------|
| N | Q2YXG5 | DR | pyrimidine nucleotide biosynthetic process                                                                                                                                                                                                   |
| N | Q2YY45 | CC | Muticidrug efflux pump that acts independently of <i>norA</i> and is one of the factors that confers resistance against diverse quinolones and chemical compounds (By similarity)                                                            |
| N | Q2YY45 | DE | Quinolone resistance protein <i>norB</i> ;                                                                                                                                                                                                   |
| N | Q2YY45 | DR | response to antibiotic                                                                                                                                                                                                                       |
| N | Q2YY45 | DR | transmembrane transport                                                                                                                                                                                                                      |
| N | Q30QX0 | CC | Allows the formation of correctly charged Asn-tRNA(Asn) or Gln-tRNA(Gln) through the transamidation of misacylated Asp- tRNA(Asn) or Glu-tRNA(Gln) in organisms which lack either or both of asparaginyl-tRNA or glutaminyl-tRNA synthetases |
| N | Q30QX0 | CC | The reaction takes place in the presence of glutamine and ATP through an activated phospho-Asp-tRNA(Asn) or phospho-Glu-tRNA(Gln) (By similarity).                                                                                           |
| N | Q30QX0 | DE | Asp/Glu-ADT subunit B;                                                                                                                                                                                                                       |
| N | Q30QX0 | DE | Aspartyl/glutamyl-tRNA(Asn/Gln) amidotransferase subunit B;                                                                                                                                                                                  |
| N | Q30QX0 | DR | carbon-nitrogen ligase activity, with glutamine as amido-N-donor                                                                                                                                                                             |
| N | Q30T61 | DE | Acetohydroxy-acid isomeroreductase;                                                                                                                                                                                                          |
| N | Q30T61 | DE | Alpha-keto-beta-hydroxylacil reductoisomerase;                                                                                                                                                                                               |
| N | Q30T61 | DE | Ketol-acid reductoisomerase;                                                                                                                                                                                                                 |
| N | Q30T61 | DR | branched chain family amino acid biosynthetic process                                                                                                                                                                                        |
| N | Q30T61 | DR | coenzyme binding                                                                                                                                                                                                                             |
| N | Q30T61 | DR | ketol-acid reductoisomerase activity                                                                                                                                                                                                         |
| N | Q30T61 | DR | oxidation-reduction process                                                                                                                                                                                                                  |
| N | Q30WM4 | DE | Branched-chain carboxylic acid kinase;                                                                                                                                                                                                       |
| N | Q30WM4 | DE | Probable butyrate kinase;                                                                                                                                                                                                                    |
| N | Q30WM4 | DR | butyrate kinase activity                                                                                                                                                                                                                     |
| N | Q30YX6 | CC | The <i>ruvA-ruvB</i> complex in the presence of ATP renatures cruciform structure in supercoiled DNA with palindromic sequence, indicating that it may promote strand exchange reactions in homologous recombination                         |
| N | Q30YX6 | CC | <i>RuvA</i> stimulates, in the presence of DNA, the weak ATPase activity of <i>ruvB</i> (By similarity).                                                                                                                                     |
| N | Q30YX6 | CC | <i>RuvAB</i> is an helicase that mediates the Holliday junction migration by localized denaturation and reannealing                                                                                                                          |
| N | Q30YX6 | DE | Holliday junction ATP-dependent DNA helicase <i>ruvA</i> ;                                                                                                                                                                                   |
| N | Q30YX6 | DR | DNA recombination                                                                                                                                                                                                                            |
| N | Q30YX6 | DR | four-way junction helicase activity                                                                                                                                                                                                          |
| N | Q30ZT5 | CC | ATPase subunit of a proteasome-like degradation complex; this subunit has chaperone activity                                                                                                                                                 |
| N | Q30ZT5 | CC | HslU recognizes the N-terminal part of its protein substrates and unfolds these before they are guided to HslV for hydrolysis (By similarity).                                                                                               |
| N | Q30ZT5 | CC | The binding of ATP and its subsequent hydrolysis by HslU are essential for unfolding of protein substrates subsequently hydrolyzed by HslV                                                                                                   |
| N | Q30ZT5 | DE | ATP-dependent protease ATPase subunit HslU;                                                                                                                                                                                                  |
| N | Q30ZT5 | DE | Unfoldase HslU;                                                                                                                                                                                                                              |
| N | Q30ZT5 | DR | ATPase activity                                                                                                                                                                                                                              |
| N | Q30ZT5 | DR | peptidase activity, acting on L-amino acid peptides                                                                                                                                                                                          |
| N | Q30ZT5 | DR | response to stress                                                                                                                                                                                                                           |
| N | Q314N8 | DE | UPF0597 protein Dde_0807;                                                                                                                                                                                                                    |
| N | Q318J4 | CC | Binds to 23S rRNA                                                                                                                                                                                                                            |
| N | Q318J4 | CC | Forms part of two intersubunit bridges in the 70S ribosome (By similarity).                                                                                                                                                                  |
| N | Q318J4 | DE | 50S ribosomal protein L14;                                                                                                                                                                                                                   |
| N | Q318J4 | DR | structural constituent of ribosome                                                                                                                                                                                                           |
| N | Q318Q5 | CC | Binds directly to 16S ribosomal RNA (By similarity).                                                                                                                                                                                         |
| N | Q318Q5 | DE | 30S ribosomal protein S20;                                                                                                                                                                                                                   |
| N | Q318Q5 | DR | structural constituent of ribosome                                                                                                                                                                                                           |
| N | Q319M2 | CC | Catalyzes the phosphorylation of NAD to NADP                                                                                                                                                                                                 |
| N | Q319M2 | CC | Utilizes ATP and other nucleoside triphosphates as well as inorganic polyphosphate as a source of phosphorus (By similarity).                                                                                                                |
| N | Q319M2 | DE | Poly(P)/ATP NAD kinase 2;                                                                                                                                                                                                                    |
| N | Q319M2 | DE | Probable inorganic polyphosphate/ATP-NAD kinase 2;                                                                                                                                                                                           |
| N | Q319M2 | DR | NAD+ kinase activity                                                                                                                                                                                                                         |
| N | Q319X7 | CC | Catalyzes amidations at positions B, D, E, and G on adenosylcyclic A,C-G dinucleosides                                                                                                                                                       |
| N | Q319X7 | CC | NH(2) groups are provided by glutamine, and one molecule of ATP is hydrogenolyzed for each amidation (By similarity).                                                                                                                        |
| N | Q319X7 | DE | Cobyrinic acid synthase;                                                                                                                                                                                                                     |
| N | Q319X7 | DR | catalytic activity                                                                                                                                                                                                                           |
| N | Q319X7 | DR | cobalamin biosynthetic process                                                                                                                                                                                                               |



|   |        |    |                                                                                                                                                                                                                        |
|---|--------|----|------------------------------------------------------------------------------------------------------------------------------------------------------------------------------------------------------------------------|
| N | Q319X7 | DR | glutamine metabolic process                                                                                                                                                                                            |
| N | Q31BZ1 | CC | Uses Mg-ATP and reduced ferredoxin to reduce ring D of protochlorophyllide (Pchl) to form chlorophyllide a (Chl) (By similarity)                                                                                       |
| N | Q31BZ1 | CC | This reaction is light-independent.                                                                                                                                                                                    |
| N | Q31BZ1 | DE | DPOR subunit L;                                                                                                                                                                                                        |
| N | Q31BZ1 | DE | LI-POR subunit L;                                                                                                                                                                                                      |
| N | Q31BZ1 | DE | Light-independent protochlorophyllide reductase iron-sulfur ATP-binding protein                                                                                                                                        |
| N | Q31BZ1 | DR | 4 iron, 4 sulfur cluster binding                                                                                                                                                                                       |
| N | Q31BZ1 | DR | chlorophyll biosynthetic process                                                                                                                                                                                       |
| N | Q31BZ1 | DR | metal ion binding                                                                                                                                                                                                      |
| N | Q31BZ1 | DR | oxidation-reduction process                                                                                                                                                                                            |
| N | Q31BZ1 | DR | oxidoreductase activity, acting on iron-sulfur proteins as donors                                                                                                                                                      |
| N | Q31BZ1 | DR | photosynthesis, dark reaction                                                                                                                                                                                          |
| N | Q31C13 | CC | Responsible for the release of ribosomes from messenger RNA at the termination of protein biosynthesis                                                                                                                 |
| N | Q31C13 | CC | May increase the efficiency of translation by recycling ribosomes from one round of translation to another (By similarity).                                                                                            |
| N | Q31C13 | DE | Ribosome-recycling factor;                                                                                                                                                                                             |
| N | Q31C13 | DE | Ribosome-releasing factor;                                                                                                                                                                                             |
| N | Q31HI0 | CC | Catalyzes the oxidation of 3-carboxy-2-hydroxy-4- methylpentanoate (3-isopropylmalate) to 3-carboxy-4-methyl-2- oxopentanoate                                                                                          |
| N | Q31HI0 | CC | The product decarboxylates to 4-methyl-2 oxopentanoate (By similarity).                                                                                                                                                |
| N | Q31HI0 | DE | 3-isopropylmalate dehydrogenase;                                                                                                                                                                                       |
| N | Q31HI0 | DE | Beta-IPM dehydrogenase;                                                                                                                                                                                                |
| N | Q31HI0 | DR | 3-isopropylmalate dehydrogenase activity                                                                                                                                                                               |
| N | Q31HI0 | DR | leucine biosynthetic process                                                                                                                                                                                           |
| N | Q31HI0 | DR | magnesium ion binding                                                                                                                                                                                                  |
| N | Q31HI0 | DR | oxidation-reduction process                                                                                                                                                                                            |
| N | Q31IW7 | CC | This protein binds to the 23S rRNA, and is important in its secondary structure                                                                                                                                        |
| N | Q31IW7 | CC | It is located near the subunit interface in the base of the L7/L12 stalk, and near the tRNA binding site of the peptidyltransferase center (By similarity).                                                            |
| N | Q31IW7 | DE | 50S ribosomal protein L6;                                                                                                                                                                                              |
| N | Q31IW7 | DR | structural constituent of ribosome                                                                                                                                                                                     |
| N | Q31TI1 | DE | Aspartate carbamoyltransferase;                                                                                                                                                                                        |
| N | Q31TI1 | DE | Aspartate transcarbamylase;                                                                                                                                                                                            |
| N | Q31TI1 | DR | 'de novo' pyrimidine base biosynthetic process                                                                                                                                                                         |
| N | Q31TI1 | DR | amino acid binding                                                                                                                                                                                                     |
| N | Q31TI1 | DR | aspartate carbamoyltransferase activity                                                                                                                                                                                |
| N | Q31TI1 | DR | cellular amino acid metabolic process                                                                                                                                                                                  |
| N | Q31TI1 | DR | pyrimidine nucleotide biosynthetic process                                                                                                                                                                             |
| N | Q31WA8 | CC | Efflux pump whose substrates are p-hydroxybenzoic acid (pHBA), 6-hydroxy-2-naphthoic and 2-hydroxycinnamate                                                                                                            |
| N | Q31WA8 | CC | Could function as a metabolic relief valve, allowing to eliminate certain compounds when they accumulate to high levels in the cell (By similarity).                                                                   |
| N | Q31WA8 | DE | p-hydroxybenzoic acid efflux pump subunit AaeB;                                                                                                                                                                        |
| N | Q31WA8 | DE | pHBA efflux pump protein B;                                                                                                                                                                                            |
| N | Q31XA6 | CC | Nucleotidase with a broad substrate specificity as it can dephosphorylate various ribo- and deoxyribonucleoside 5'- monophosphates and ribonucleoside 3'- monophosphates with highest affinity to 3'-AMP               |
| N | Q31XA6 | CC | Also hydrolyzes polyphosphate (exopolyphosphatase activity) with the preference for short-chain- length substrates (P20-25)                                                                                            |
| N | Q31XA6 | CC | Might be involved in the regulation of dNTP and NTP pools, and in the turnover of 3'-mononucleotides produced by numerous intracellular RNases (T1, T2, and F) during the degradation of various RNAs (By similarity). |
| N | Q31XA6 | DE | 5'/3'-nucleotidase;                                                                                                                                                                                                    |
| N | Q31XA6 | DE | Exopolyphosphatase;                                                                                                                                                                                                    |
| N | Q31XA6 | DE | Multifunctional protein surE;                                                                                                                                                                                          |
| N | Q31XA6 | DE | Nucleoside monophosphate phosphohydrolase;                                                                                                                                                                             |
| N | Q31XA6 | DR | 3'-nucleotidase activity                                                                                                                                                                                               |
| N | Q31XA6 | DR | 5'-nucleotidase activity                                                                                                                                                                                               |
| N | Q31XA6 | DR | exopolyphosphatase activity                                                                                                                                                                                            |
| N | Q31XA6 | DR | metal ion binding                                                                                                                                                                                                      |
| N | Q31XA6 | DR | nucleotide binding                                                                                                                                                                                                     |

|   |        |    |                                                                                                                                                                                                          |
|---|--------|----|----------------------------------------------------------------------------------------------------------------------------------------------------------------------------------------------------------|
| N | Q31Y68 | CC | DNA ligase that catalyzes the formation of phosphodiester linkages between 5'-phosphoryl and 3'-hydroxyl groups in double-stranded DNA using NAD as a coenzyme and as the energy source for the reaction |
| N | Q31Y68 | CC | It is essential for DNA replication and repair of damaged DNA (By similarity).                                                                                                                           |
| N | Q31Y68 | DE | Polydeoxyribonucleotide synthase [NAD+];                                                                                                                                                                 |
| N | Q31Y68 | DR | DNA ligase (NAD+) activity                                                                                                                                                                               |
| N | Q31Y68 | DR | DNA replication                                                                                                                                                                                          |
| N | Q31Y68 | DR | metal ion binding                                                                                                                                                                                        |
| N | Q321N6 | CC | Transforms N(2)-succinylglutamate into succinate and glutamate.                                                                                                                                          |
| N | Q321N6 | DE | Succinylglutamate desuccinylase;                                                                                                                                                                         |
| N | Q321N6 | DR | arginine catabolic process to glutamate                                                                                                                                                                  |
| N | Q321N6 | DR | hydrolase activity, acting on ester bonds                                                                                                                                                                |
| N | Q321N6 | DR | succinylglutamate desuccinylase activity                                                                                                                                                                 |
| N | Q321N6 | DR | zinc ion binding                                                                                                                                                                                         |
| N | Q325G3 | CC | ATP-dependent specificity component of the Clp protease                                                                                                                                                  |
| N | Q325G3 | CC | Can perform chaperone functions in the absence of ClpP (By similarity).                                                                                                                                  |
| N | Q325G3 | CC | It directs the protease to specific substrates                                                                                                                                                           |
| N | Q325G3 | DE | ATP-dependent Clp protease ATP-binding subunit ClpX;                                                                                                                                                     |
| N | Q325G3 | DR | ATPase activity                                                                                                                                                                                          |
| N | Q325G3 | DR | protein dimerization activity                                                                                                                                                                            |
| N | Q325G3 | DR | protein folding                                                                                                                                                                                          |
| N | Q325G3 | DR | unfolded protein binding                                                                                                                                                                                 |
| N | Q325G3 | DR | zinc ion binding                                                                                                                                                                                         |
| N | Q328K0 | CC | Catalyzes the isomerization of L-ribulose 5-phosphate to D-xylulose 5-phosphate                                                                                                                          |
| N | Q328K0 | CC | Is involved in the anaerobic L-ascorbate utilization (By similarity).                                                                                                                                    |
| N | Q328K0 | DE | L-ascorbate utilization protein F;                                                                                                                                                                       |
| N | Q328K0 | DE | L-ribulose-5-phosphate 4-epimerase UlaF;                                                                                                                                                                 |
| N | Q328K0 | DE | Phosphoribulose isomerase;                                                                                                                                                                               |
| N | Q328K0 | DR | L-ribulose-phosphate 4-epimerase activity                                                                                                                                                                |
| N | Q328K0 | DR | metal ion binding                                                                                                                                                                                        |
| N | Q329T3 | DE | Asparagine synthetase A;                                                                                                                                                                                 |
| N | Q329T3 | DE | Aspartate--ammonia ligase;                                                                                                                                                                               |
| N | Q329T3 | DR | aminoacyl-tRNA ligase activity                                                                                                                                                                           |
| N | Q329T3 | DR | asparagine biosynthetic process                                                                                                                                                                          |
| N | Q329T3 | DR | aspartate-ammonia ligase activity                                                                                                                                                                        |
| N | Q329T3 | DR | tRNA aminoacylation for protein translation                                                                                                                                                              |
| N | Q32B33 | CC | One of the early assembly proteins it binds 23S rRNA                                                                                                                                                     |
| N | Q32B33 | CC | forms the main docking site for trigger factor binding to the ribosome (By similarity)                                                                                                                   |
| N | Q32B33 | CC | One of the proteins that surrounds the polypeptide exit tunnel on the outside of the ribosome                                                                                                            |
| N | Q32B33 | DE | 50S ribosomal protein L23;                                                                                                                                                                               |
| N | Q32B33 | DR | nucleotide binding                                                                                                                                                                                       |
| N | Q32B33 | DR | structural constituent of ribosome                                                                                                                                                                       |
| N | Q32BX2 | CC | Activator of cell division through the inhibition of FtsZ GTPase activity, therefore promoting FtsZ assembly into bundles of protofilaments necessary for the formation of the division Z ring           |
| N | Q32BX2 | CC | it is recruited early at mid-cell but it is not essential for cell division (By similarity)                                                                                                              |
| N | Q32BX2 | DE | Cell division protein ZapA;                                                                                                                                                                              |
| N | Q32BX2 | DE | Z ring-associated protein ZapA;                                                                                                                                                                          |
| N | Q32BX2 | DR | barrier septum formation                                                                                                                                                                                 |
| N | Q32CG5 | CC | Reduction of activated sulfate into sulfite.                                                                                                                                                             |
| N | Q32CG5 | DE | 3'-phosphoadenylylsulfate reductase;                                                                                                                                                                     |
| N | Q32CG5 | DE | PAPS reductase, thioredoxin dependent;                                                                                                                                                                   |
| N | Q32CG5 | DE | PAPS sulfotransferase;                                                                                                                                                                                   |
| N | Q32CG5 | DE | PAdoPS reductase;                                                                                                                                                                                        |
| N | Q32CG5 | DE | Phosphoadenosine phosphosulfate reductase;                                                                                                                                                               |
| N | Q32CG5 | DR | cysteine biosynthetic process                                                                                                                                                                            |
| N | Q32CG5 | DR | phosphoadenylyl-sulfate reductase (thioredoxin) activity                                                                                                                                                 |
| N | Q32CG5 | DR | sulfate assimilation, phosphoadenylyl sulfate reduction by phosphoadenylyl-sulfate reductase (thioredoxin)                                                                                               |
| N | Q32FI6 | DE | Phenylalanine--tRNA ligase beta chain;                                                                                                                                                                   |
| N | Q32FI6 | DE | Phenylalanyl-tRNA synthetase beta chain;                                                                                                                                                                 |
| N | Q32FI6 | DR | magnesium ion binding                                                                                                                                                                                    |
| N | Q32FI6 | DR | phenylalanine-tRNA ligase activity                                                                                                                                                                       |
| N | Q32FI6 | DR | phenylalanyl-tRNA aminoacylation                                                                                                                                                                         |

|   |        |    |                                                                                                                                                                                                                                                           |
|---|--------|----|-----------------------------------------------------------------------------------------------------------------------------------------------------------------------------------------------------------------------------------------------------------|
| N | Q32FI6 | DR | tRNA processing                                                                                                                                                                                                                                           |
| N | Q32GS9 | CC | The beta subunit is responsible for the synthesis of L- tryptophan from indole and L-serine.                                                                                                                                                              |
| N | Q32GS9 | DE | Tryptophan synthase beta chain;                                                                                                                                                                                                                           |
| N | Q32GS9 | DR | pyridoxal phosphate binding                                                                                                                                                                                                                               |
| N | Q32GS9 | DR | tryptophan synthase activity                                                                                                                                                                                                                              |
| N | Q32J26 | CC | Catalyzes the transfer of a phosphate group to glutamate to form glutamate 5-phosphate which rapidly cyclizes to 5- oxoproline.                                                                                                                           |
| N | Q32J26 | DE | Gamma-glutamyl kinase;                                                                                                                                                                                                                                    |
| N | Q32J26 | DE | Glutamate 5-kinase;                                                                                                                                                                                                                                       |
| N | Q32J26 | DR | glutamate 5-kinase activity                                                                                                                                                                                                                               |
| N | Q32J26 | DR | proline biosynthetic process                                                                                                                                                                                                                              |
| N | Q32K67 | CC | Hydrolyzes both purine and pyrimidine ribonucleosides with a broad-substrate specificity (By similarity).                                                                                                                                                 |
| N | Q32K67 | DE | Non-specific ribonucleoside hydrolase rihC;                                                                                                                                                                                                               |
| N | Q32K67 | DE | Purine/pyrimidine ribonucleoside hydrolase;                                                                                                                                                                                                               |
| N | Q32K67 | DR | hydrolase activity, hydrolyzing N-glycosyl compounds                                                                                                                                                                                                      |
| N | Q32KN8 | CC | Tubulin is the major constituent of microtubules                                                                                                                                                                                                          |
| N | Q32KN8 | CC | It binds two moles of GTP, one at an exchangeable site on the beta chain and one at a non-exchangeable site on the alpha-chain (By similarity).                                                                                                           |
| N | Q32KN8 | DE | Alpha-tubulin 3;                                                                                                                                                                                                                                          |
| N | Q32KN8 | DE | Tubulin alpha-3 chain;                                                                                                                                                                                                                                    |
| N | Q32KN8 | DR | GTPase activity                                                                                                                                                                                                                                           |
| N | Q32KN8 | DR | microtubule-based movement                                                                                                                                                                                                                                |
| N | Q32KN8 | DR | protein polymerization                                                                                                                                                                                                                                    |
| N | Q32KN8 | DR | structural molecule activity                                                                                                                                                                                                                              |
| N | Q32LA4 | DE | Uracil phosphoribosyltransferase homolog;                                                                                                                                                                                                                 |
| N | Q32LA4 | DR | nucleoside metabolic process                                                                                                                                                                                                                              |
| N | Q32LB9 | DE | Uncharacterized protein C4orf14 homolog;                                                                                                                                                                                                                  |
| N | Q32LZ8 | CC | Lipid hydrolase (By similarity).                                                                                                                                                                                                                          |
| N | Q32LZ8 | DE | Patatin-like phospholipase domain-containing protein 5;                                                                                                                                                                                                   |
| N | Q32LZ8 | DR | hydrolase activity                                                                                                                                                                                                                                        |
| N | Q32LZ8 | DR | lipid catabolic process                                                                                                                                                                                                                                   |
| N | Q32NI8 | CC | Condensing enzyme that catalyzes the synthesis of very long chain fatty acids (By similarity).                                                                                                                                                            |
| N | Q32NI8 | DE | 3-keto acyl-CoA synthase elovl5;                                                                                                                                                                                                                          |
| N | Q32NI8 | DE | Elongation of very long chain fatty acids protein 5;                                                                                                                                                                                                      |
| N | Q32NI8 | DR | fatty acid elongase activity                                                                                                                                                                                                                              |
| N | Q32NI8 | DR | very long-chain fatty acid biosynthetic process                                                                                                                                                                                                           |
| N | Q32NX4 | DE | Na(+)/K(+)-transporting ATPase subunit beta-1-interacting protein 4;                                                                                                                                                                                      |
| N | Q32NX4 | DE | Sodium/potassium-transporting ATPase subunit beta-1-interacting protein 4;                                                                                                                                                                                |
| N | Q32PG7 | DE | Transmembrane protein 175;                                                                                                                                                                                                                                |
| N | Q32RJ3 | CC | Component of the cytochrome b6-f complex, which mediates electron transfer between photosystem II (PSII) and photosystem I (PSI), cyclic electron flow around PSI, and state transitions (By similarity).                                                 |
| N | Q32RJ3 | DE | Apocytochrome f;                                                                                                                                                                                                                                          |
| N | Q32RJ3 | DR | electron carrier activity                                                                                                                                                                                                                                 |
| N | Q32RJ3 | DR | electron transport chain                                                                                                                                                                                                                                  |
| N | Q32RJ3 | DR | photosynthesis                                                                                                                                                                                                                                            |
| N | Q32RK6 | CC | Uses Mg-ATP and reduced ferredoxin to reduce ring D of protochlorophyllide (Pchl) to form chlorophyllide a (Chl) (By similarity)                                                                                                                          |
| N | Q32RK6 | CC | This reaction is light-independent.                                                                                                                                                                                                                       |
| N | Q32RK6 | DE | DPOR subunit N;                                                                                                                                                                                                                                           |
| N | Q32RK6 | DE | LI-POR subunit N;                                                                                                                                                                                                                                         |
| N | Q32RK6 | DE | Light-independent protochlorophyllide reductase subunit N;                                                                                                                                                                                                |
| N | Q32RK6 | DR | chlorophyll biosynthetic process                                                                                                                                                                                                                          |
| N | Q32RK6 | DR | oxidation-reduction process                                                                                                                                                                                                                               |
| N | Q32RK6 | DR | oxidoreductase activity, acting on iron-sulfur proteins as donors                                                                                                                                                                                         |
| N | Q32RK6 | DR | photosynthesis, dark reaction                                                                                                                                                                                                                             |
| N | Q32RM0 | CC | Apoprotein for the two 4Fe-4S centers FA and FB of photosystem I (PSI); essential for photochemical activity                                                                                                                                              |
| N | Q32RM0 | CC | FB is the terminal electron acceptor of PSI, donating electrons to ferredoxin                                                                                                                                                                             |
| N | Q32RM0 | CC | PSI is a plastocyanin-ferredoxin oxidoreductase, converting photonic excitation into a charge separation, which transfers an electron from the donor P700 chlorophyll pair to the spectroscopically characterized acceptors A0, A1, FX, FA and FB in turn |

|   |        |    |                                                                                                                                                                                                                                   |
|---|--------|----|-----------------------------------------------------------------------------------------------------------------------------------------------------------------------------------------------------------------------------------|
| N | Q32RM0 | CC | Required for binding of psaD and psaE to PSI                                                                                                                                                                                      |
| N | Q32RM0 | CC | The C-terminus interacts with psaA/B/D and helps assemble the protein into the PSI complex                                                                                                                                        |
| N | Q32RM0 | DE | 9 kDa polypeptide;                                                                                                                                                                                                                |
| N | Q32RM0 | DE | Photosystem I iron-sulfur center;                                                                                                                                                                                                 |
| N | Q32RM0 | DE | Photosystem I subunit VII;                                                                                                                                                                                                        |
| N | Q32RM0 | DR | 4 iron, 4 sulfur cluster binding                                                                                                                                                                                                  |
| N | Q32RM0 | DR | electron carrier activity                                                                                                                                                                                                         |
| N | Q32RM0 | DR | metal ion binding                                                                                                                                                                                                                 |
| N | Q32RM0 | DR | photosynthetic electron transport in photosystem I                                                                                                                                                                                |
| N | Q32RT0 | CC | One of the two reaction center proteins of photosystem II (PSII), D2 is needed for assembly of a stable PSII complex (By similarity).                                                                                             |
| N | Q32RT0 | DE | PSII D2 protein;                                                                                                                                                                                                                  |
| N | Q32RT0 | DE | Photosystem II D2 protein;                                                                                                                                                                                                        |
| N | Q32RT0 | DE | Photosystem Q(A) protein;                                                                                                                                                                                                         |
| N | Q32RT0 | DR | electron transporter, transferring electrons within the cyclic electron transport pathway of photosynthesis activity                                                                                                              |
| N | Q32RT0 | DR | metal ion binding                                                                                                                                                                                                                 |
| N | Q32RT0 | DR | photosynthetic electron transport in photosystem II                                                                                                                                                                               |
| N | Q32RY5 | CC | seems to be required for the assembly of the photosystem I complex (By similarity)                                                                                                                                                |
| N | Q32RY5 | DE | Photosystem I assembly protein ycf3;                                                                                                                                                                                              |
| N | Q32RY5 | DR | photosynthesis                                                                                                                                                                                                                    |
| N | Q32S05 | CC | NDH shuttles electrons from NAD(P)H:plastoquinone, via FMN and iron-sulfur (Fe-S) centers, to quinones in the photosynthetic chain and possibly in a chloroplast respiratory chain                                                |
| N | Q32S05 | CC | Couples the redox reaction to proton translocation, and thus conserves the redox energy in a proton gradient (By similarity).                                                                                                     |
| N | Q32S05 | CC | The immediate electron acceptor for the enzyme in this species is believed to be plastoquinone                                                                                                                                    |
| N | Q32S05 | DE | NAD(P)H dehydrogenase subunit 4L;                                                                                                                                                                                                 |
| N | Q32S05 | DE | NAD(P)H-quinone oxidoreductase subunit 4L, chloroplastic;                                                                                                                                                                         |
| N | Q32S05 | DE | NADH-plastoquinone oxidoreductase subunit 4L;                                                                                                                                                                                     |
| N | Q32S05 | DR | ATP synthesis coupled electron transport                                                                                                                                                                                          |
| N | Q32S05 | DR | oxidoreductase activity, acting on NADH or NADPH                                                                                                                                                                                  |
| N | Q32S05 | DR | quinone binding                                                                                                                                                                                                                   |
| N | Q332R6 | CC | Binds to 23S rRNA (By similarity).                                                                                                                                                                                                |
| N | Q332R6 | DE | 50S ribosomal protein L23, chloroplastic;                                                                                                                                                                                         |
| N | Q332R6 | DR | nucleotide binding                                                                                                                                                                                                                |
| N | Q332R6 | DR | structural constituent of ribosome                                                                                                                                                                                                |
| N | Q33528 | CC | RuBisCO catalyzes two reactions: the carboxylation of D- ribulose 1,5-bisphosphate, the primary event in carbon dioxide fixation, as well as the oxidative fragmentation of the pentose substrate in the photorespiration process |
| N | Q33528 | CC | Both reactions occur simultaneously and in competition at the same active site (By similarity).                                                                                                                                   |
| N | Q33528 | DE | Ribulose biphosphate carboxylase large chain;                                                                                                                                                                                     |
| N | Q33528 | DE | RuBisCO large subunit;                                                                                                                                                                                                            |
| N | Q33528 | DR | magnesium ion binding                                                                                                                                                                                                             |
| N | Q33528 | DR | monooxygenase activity                                                                                                                                                                                                            |
| N | Q33528 | DR | oxidation-reduction process                                                                                                                                                                                                       |
| N | Q33528 | DR | photorespiration                                                                                                                                                                                                                  |
| N | Q33528 | DR | reductive pentose-phosphate cycle                                                                                                                                                                                                 |
| N | Q33528 | DR | ribulose-bisphosphate carboxylase activity                                                                                                                                                                                        |
| N | Q33820 | CC | Cytochrome c oxidase is the component of the respiratory chain that catalyzes the reduction of oxygen to water                                                                                                                    |
| N | Q33820 | CC | CO I is the catalytic subunit of the enzyme                                                                                                                                                                                       |
| N | Q33820 | CC | Electrons originating in cytochrome c are transferred via the copper A center of subunit 2 and heme A of subunit 1 to the bimetallic center formed by heme A3 and copper B                                                        |
| N | Q33820 | CC | Subunits 1- 3 form the functional core of the enzyme complex                                                                                                                                                                      |
| N | Q33820 | DE | Cytochrome c oxidase polypeptide I;                                                                                                                                                                                               |
| N | Q33820 | DE | Cytochrome c oxidase subunit 1;                                                                                                                                                                                                   |
| N | Q33820 | DR | aerobic respiration                                                                                                                                                                                                               |
| N | Q33820 | DR | cytochrome-c oxidase activity                                                                                                                                                                                                     |
| N | Q33820 | DR | electron carrier activity                                                                                                                                                                                                         |
| N | Q33820 | DR | electron transport chain                                                                                                                                                                                                          |
| N | Q33BZ0 | DE | 50S ribosomal protein L2, chloroplastic;                                                                                                                                                                                          |

|   |        |    |                                                                                                                                                                                                                                     |
|---|--------|----|-------------------------------------------------------------------------------------------------------------------------------------------------------------------------------------------------------------------------------------|
| N | Q33BZ0 | DR | structural constituent of ribosome                                                                                                                                                                                                  |
| N | Q33BZ0 | DR | transferase activity                                                                                                                                                                                                                |
| N | Q34941 | CC | Cytochrome c oxidase is the component of the respiratory chain that catalyzes the reduction of oxygen to water                                                                                                                      |
| N | Q34941 | CC | CO I is the catalytic subunit of the enzyme                                                                                                                                                                                         |
| N | Q34941 | CC | Electrons originating in cytochrome c are transferred via the copper A center of subunit 2 and heme A of subunit 1 to the bimetallic center formed by heme A3 and copper B                                                          |
| N | Q34941 | CC | Subunits 1- 3 form the functional core of the enzyme complex                                                                                                                                                                        |
| N | Q34941 | DE | Cytochrome c oxidase polypeptide I;                                                                                                                                                                                                 |
| N | Q34941 | DE | Cytochrome c oxidase subunit 1;                                                                                                                                                                                                     |
| N | Q34941 | DR | aerobic respiration                                                                                                                                                                                                                 |
| N | Q34941 | DR | cytochrome-c oxidase activity                                                                                                                                                                                                       |
| N | Q34941 | DR | electron carrier activity                                                                                                                                                                                                           |
| N | Q34941 | DR | electron transport chain                                                                                                                                                                                                            |
| N | Q36610 | CC | RuBisCO catalyzes two reactions: the carboxylation of D- ribulose 1,5-bisphosphate, the primary event in carbon dioxide fixation, as well as the oxidative fragmentation of the pentose substrate in the photorespiration process   |
| N | Q36610 | CC | Both reactions occur simultaneously and in competition at the same active site (By similarity).                                                                                                                                     |
| N | Q36610 | DE | Ribulose biphosphate carboxylase large chain;                                                                                                                                                                                       |
| N | Q36610 | DE | RuBisCO large subunit;                                                                                                                                                                                                              |
| N | Q36610 | DR | magnesium ion binding                                                                                                                                                                                                               |
| N | Q36610 | DR | monooxygenase activity                                                                                                                                                                                                              |
| N | Q36610 | DR | oxidation-reduction process                                                                                                                                                                                                         |
| N | Q36610 | DR | photorespiration                                                                                                                                                                                                                    |
| N | Q36610 | DR | reductive pentose-phosphate cycle                                                                                                                                                                                                   |
| N | Q36610 | DR | ribulose-bisphosphate carboxylase activity                                                                                                                                                                                          |
| N | Q36852 | CC | Mitochondrial membrane ATP synthase (F(1)F(0) ATP synthase or Complex V) produces ATP from ADP in the presence of a proton gradient across the membrane which is generated by electron transport complexes of the respiratory chain |
| N | Q36852 | CC | A nonameric c-ring of probably 10 subunits is part of the complex rotary element                                                                                                                                                    |
| N | Q36852 | CC | During catalysis, ATP synthesis in the catalytic domain of F(1) is coupled via a rotary mechanism of the central stalk subunits to proton translocation                                                                             |
| N | Q36852 | CC | F-type ATPases consist of two structural domains, F(1) - containing the extramembraneous catalytic core and F(0) - containing the membrane proton channel, linked together by a central stalk and a peripheral stalk                |
| N | Q36852 | CC | Part of the complex F(0) domain                                                                                                                                                                                                     |
| N | Q36852 | DE | ATP synthase subunit 9, mitochondrial;                                                                                                                                                                                              |
| N | Q36852 | DE | Lipid-binding protein;                                                                                                                                                                                                              |
| N | Q36852 | DR | ATP hydrolysis coupled proton transport                                                                                                                                                                                             |
| N | Q36852 | DR | ATP synthesis coupled proton transport                                                                                                                                                                                              |
| N | Q36852 | DR | hydrogen ion transmembrane transporter activity                                                                                                                                                                                     |
| N | Q36852 | DR | lipid binding                                                                                                                                                                                                                       |
| N | Q36907 | DE | Uncharacterized protein ycf73;                                                                                                                                                                                                      |
| N | Q37717 | CC | Core subunit of the mitochondrial membrane respiratory chain NADH dehydrogenase (Complex I) that is believed to belong to the minimal assembly                                                                                      |
| N | Q37717 | CC | Complex for catalysis in the transfer of electrons from NADH to the respiratory chain                                                                                                                                               |
| N | Q37717 | CC | The immediate electron acceptor for the enzyme is believed to be ubiquinone (By similarity).                                                                                                                                        |
| N | Q37717 | DE | NADH dehydrogenase subunit 1;                                                                                                                                                                                                       |
| N | Q37717 | DE | NADH-ubiquinone oxidoreductase chain 1;                                                                                                                                                                                             |
| N | Q37717 | DR | NADH dehydrogenase (ubiquinone) activity                                                                                                                                                                                            |
| N | Q37717 | DR | electron transport chain                                                                                                                                                                                                            |
| N | Q37787 | CC | Core subunit of the mitochondrial membrane respiratory chain NADH dehydrogenase (Complex I) that is believed to belong to the minimal assembly                                                                                      |
| N | Q37787 | CC | Complex for catalysis in the transfer of electrons from NADH to the respiratory chain                                                                                                                                               |
| N | Q37787 | CC | The immediate electron acceptor for the enzyme is believed to be ubiquinone (By similarity).                                                                                                                                        |
| N | Q37787 | DE | Complex I-27kD;                                                                                                                                                                                                                     |
| N | Q37787 | DE | NADH dehydrogenase subunit 9;                                                                                                                                                                                                       |
| N | Q37787 | DE | NADH-ubiquinone oxidoreductase 27 kDa subunit;                                                                                                                                                                                      |
| N | Q37787 | DR | NADH dehydrogenase (ubiquinone) activity                                                                                                                                                                                            |
| N | Q37787 | DR | electron transport chain                                                                                                                                                                                                            |
| N | Q38680 | CC | Non-catalytic subunit of the peripheral V1 complex of vacuolar ATPase                                                                                                                                                               |

|   |        |    |                                                                                                                                                                                                                                         |
|---|--------|----|-----------------------------------------------------------------------------------------------------------------------------------------------------------------------------------------------------------------------------------------|
| N | Q38680 | CC | V-ATPase is responsible for acidifying a variety of intracellular compartments in eukaryotic cells.                                                                                                                                     |
| N | Q38680 | DE | V-ATPase subunit B 2;                                                                                                                                                                                                                   |
| N | Q38680 | DE | V-type proton ATPase subunit B 2;                                                                                                                                                                                                       |
| N | Q38680 | DE | Vacuolar proton pump subunit B 2;                                                                                                                                                                                                       |
| N | Q38680 | DR | ATP hydrolysis coupled proton transport                                                                                                                                                                                                 |
| N | Q38680 | DR | hydrogen ion transporting ATP synthase activity, rotational mechanism                                                                                                                                                                   |
| N | Q38680 | DR | proton-transporting ATPase activity, rotational mechanism                                                                                                                                                                               |
| N | Q38869 | CC | May play a role in signal transduction pathways that involve calcium as a second messenger                                                                                                                                              |
| N | Q38869 | CC | functions as regulator of the calcium-mediated abscisic acid (ABA) signaling pathway                                                                                                                                                    |
| N | Q38869 | CC | Phosphorylates ABA-responsive transcription factors ABF1 and ABF4 in vitro                                                                                                                                                              |
| N | Q38869 | CC | Phosphorylates the nuclear zinc finger Di19 in vitro.                                                                                                                                                                                   |
| N | Q38869 | DE | Calcium-dependent protein kinase 4;                                                                                                                                                                                                     |
| N | Q38869 | DE | Calmodulin-domain protein kinase CDPK isoform 4;                                                                                                                                                                                        |
| N | Q38869 | DR | calcium ion binding                                                                                                                                                                                                                     |
| N | Q38869 | DR | positive regulation of abscisic acid mediated signaling pathway                                                                                                                                                                         |
| N | Q38869 | DR | protein binding                                                                                                                                                                                                                         |
| N | Q38869 | DR | protein phosphorylation                                                                                                                                                                                                                 |
| N | Q38869 | DR | protein serine/threonine kinase activity                                                                                                                                                                                                |
| N | Q38UV3 | CC | Formation of pseudouridine at positions 38, 39 and 40 in the anticodon stem and loop of transfer RNAs (By similarity).                                                                                                                  |
| N | Q38UV3 | DE | tRNA pseudouridine synthase A;                                                                                                                                                                                                          |
| N | Q38UV3 | DE | tRNA pseudouridylate synthase I;                                                                                                                                                                                                        |
| N | Q38UV3 | DE | tRNA-uridine isomerase I;                                                                                                                                                                                                               |
| N | Q38UV3 | DR | pseudouridine synthase activity                                                                                                                                                                                                         |
| N | Q38UV3 | DR | pseudouridine synthesis                                                                                                                                                                                                                 |
| N | Q38UV3 | DR | tRNA processing                                                                                                                                                                                                                         |
| N | Q38ZE2 | DE | Pantothenate kinase;                                                                                                                                                                                                                    |
| N | Q38ZE2 | DE | Pantothenic acid kinase;                                                                                                                                                                                                                |
| N | Q38ZE2 | DR | coenzyme A biosynthetic process                                                                                                                                                                                                         |
| N | Q38ZE2 | DR | pantothenate kinase activity                                                                                                                                                                                                            |
| N | Q39027 | DE | MAP kinase 7;                                                                                                                                                                                                                           |
| N | Q39027 | DE | Mitogen-activated protein kinase 7;                                                                                                                                                                                                     |
| N | Q39027 | DR | MAP kinase activity                                                                                                                                                                                                                     |
| N | Q39027 | DR | protein binding                                                                                                                                                                                                                         |
| N | Q39027 | DR | protein phosphorylation                                                                                                                                                                                                                 |
| N | Q39027 | DR | response to hydrogen peroxide                                                                                                                                                                                                           |
| N | Q39445 | CC | Tubulin is the major constituent of microtubules                                                                                                                                                                                        |
| N | Q39445 | CC | It binds two moles of GTP, one at an exchangeable site on the beta chain and one at a non-exchangeable site on the alpha-chain.                                                                                                         |
| N | Q39445 | DE | Beta-tubulin;                                                                                                                                                                                                                           |
| N | Q39445 | DE | Tubulin beta chain;                                                                                                                                                                                                                     |
| N | Q39445 | DR | GTPase activity                                                                                                                                                                                                                         |
| N | Q39445 | DR | microtubule-based movement                                                                                                                                                                                                              |
| N | Q39445 | DR | protein polymerization                                                                                                                                                                                                                  |
| N | Q39445 | DR | structural molecule activity                                                                                                                                                                                                            |
| N | Q39769 | DE | Glyceraldehyde-3-phosphate dehydrogenase, cytosolic;                                                                                                                                                                                    |
| N | Q39769 | DR | glyceraldehyde-3-phosphate dehydrogenase (NAD+) (phosphorylating) activity                                                                                                                                                              |
| N | Q39769 | DR | oxidation-reduction process                                                                                                                                                                                                             |
| N | Q39BG3 | DE | UPF0502 protein Bcep18194_B0081;                                                                                                                                                                                                        |
| N | Q39EE7 | CC | NDH-1 shuttles electrons from NADH, via FMN and iron- sulfur (Fe-S) centers, to quinones in the respiratory chain                                                                                                                       |
| N | Q39EE7 | CC | Couples the redox reaction to proton translocation (for every two electrons transferred, four hydrogen ions are translocated across the cytoplasmic membrane), and thus conserves the redox energy in a proton gradient (By similarity) |
| N | Q39EE7 | CC | The immediate electron acceptor for the enzyme in this species is believed to be ubiquinone                                                                                                                                             |
| N | Q39EE7 | DE | NADH dehydrogenase I subunit C;                                                                                                                                                                                                         |
| N | Q39EE7 | DE | NADH-quinone oxidoreductase subunit C;                                                                                                                                                                                                  |
| N | Q39EE7 | DE | NDH-1 subunit C;                                                                                                                                                                                                                        |
| N | Q39EE7 | DR | NADH dehydrogenase (ubiquinone) activity                                                                                                                                                                                                |
| N | Q39EE7 | DR | oxidation-reduction process                                                                                                                                                                                                             |
| N | Q39EE7 | DR | quinone binding                                                                                                                                                                                                                         |

|   |        |    |                                                                                                                                                                                                                                         |
|---|--------|----|-----------------------------------------------------------------------------------------------------------------------------------------------------------------------------------------------------------------------------------------|
| N | Q39GT3 | CC | Represses a number of genes involved in the response to DNA damage (SOS response), including recA and lexA                                                                                                                              |
| N | Q39GT3 | CC | In the presence of single-stranded DNA, recA interacts with lexA causing an autocatalytic cleavage which disrupts the DNA-binding part of lexA, leading to derepression of the SOS regulon and eventually DNA repair (By similarity).   |
| N | Q39GT3 | DE | LexA repressor;                                                                                                                                                                                                                         |
| N | Q39GT3 | DR | DNA replication                                                                                                                                                                                                                         |
| N | Q39GT3 | DR | serine-type endopeptidase activity                                                                                                                                                                                                      |
| N | Q39JR1 | CC | Part of the ABC transporter complex AraFGH involved in arabinose import                                                                                                                                                                 |
| N | Q39JR1 | CC | Responsible for energy coupling to the transport system (By similarity).                                                                                                                                                                |
| N | Q39JR1 | DE | Arabinose import ATP-binding protein AraG 1;                                                                                                                                                                                            |
| N | Q39JR1 | DR | L-arabinose transport                                                                                                                                                                                                                   |
| N | Q39JR1 | DR | L-arabinose-importing ATPase activity                                                                                                                                                                                                   |
| N | Q39KC4 | DE | 3-dehydroquinate synthase;                                                                                                                                                                                                              |
| N | Q39KC4 | DR | 3-dehydroquinate synthase activity                                                                                                                                                                                                      |
| N | Q39KC4 | DR | aromatic amino acid family biosynthetic process                                                                                                                                                                                         |
| N | Q39KF0 | CC | With S4 and S12 plays an important role in translational accuracy (By similarity)                                                                                                                                                       |
| N | Q39KF0 | DE | 30S ribosomal protein S5;                                                                                                                                                                                                               |
| N | Q39KF0 | DR | structural constituent of ribosome                                                                                                                                                                                                      |
| N | Q39UF9 | CC | Catalyzes the conversion of glucosamine-6-phosphate to glucosamine-1-phosphate (By similarity).                                                                                                                                         |
| N | Q39UF9 | DE | Phosphoglucosamine mutase;                                                                                                                                                                                                              |
| N | Q39UF9 | DR | carbohydrate metabolic process                                                                                                                                                                                                          |
| N | Q39UF9 | DR | magnesium ion binding                                                                                                                                                                                                                   |
| N | Q39UF9 | DR | phosphoglucosamine mutase activity                                                                                                                                                                                                      |
| N | Q39VA3 | CC | Responsible for synthesis of pseudouridine from uracil- 55 in the psi GC loop of transfer RNAs (By similarity).                                                                                                                         |
| N | Q39VA3 | DE | Psi55 synthase;                                                                                                                                                                                                                         |
| N | Q39VA3 | DE | tRNA pseudouridine 55 synthase;                                                                                                                                                                                                         |
| N | Q39VA3 | DE | tRNA pseudouridine synthase B;                                                                                                                                                                                                          |
| N | Q39VA3 | DE | tRNA pseudouridylate synthase;                                                                                                                                                                                                          |
| N | Q39VA3 | DE | tRNA-uridine isomerase;                                                                                                                                                                                                                 |
| N | Q39VA3 | DR | pseudouridine synthase activity                                                                                                                                                                                                         |
| N | Q39VA3 | DR | pseudouridine synthesis                                                                                                                                                                                                                 |
| N | Q39VA3 | DR | tRNA processing                                                                                                                                                                                                                         |
| N | Q39VY5 | CC | Catalyzes the decarboxylation of orotidine 5'- monophosphate (OMP) to uridine 5'-monophosphate (UMP) (By similarity).                                                                                                                   |
| N | Q39VY5 | DE | OMP decarboxylase;                                                                                                                                                                                                                      |
| N | Q39VY5 | DE | Orotidine 5'-phosphate decarboxylase;                                                                                                                                                                                                   |
| N | Q39VY5 | DR | 'de novo' UMP biosynthetic process                                                                                                                                                                                                      |
| N | Q39VY5 | DR | 'de novo' pyrimidine base biosynthetic process                                                                                                                                                                                          |
| N | Q39VY5 | DR | orotidine-5'-phosphate decarboxylase activity                                                                                                                                                                                           |
| N | Q39W87 | CC | Associates with the EF-Tu.GDP complex and induces the exchange of GDP to GTP                                                                                                                                                            |
| N | Q39W87 | CC | It remains bound to the aminoacyl-tRNA.EF- Tu.GTP complex up to the GTP hydrolysis stage on the ribosome.                                                                                                                               |
| N | Q39W87 | DE | Elongation factor Ts;                                                                                                                                                                                                                   |
| N | Q39W87 | DR | translation elongation factor activity                                                                                                                                                                                                  |
| N | Q39ZB0 | CC | NDH-1 shuttles electrons from NADH, via FMN and iron- sulfur (Fe-S) centers, to quinones in the respiratory chain                                                                                                                       |
| N | Q39ZB0 | CC | Couples the redox reaction to proton translocation (for every two electrons transferred, four hydrogen ions are translocated across the cytoplasmic membrane), and thus conserves the redox energy in a proton gradient (By similarity) |
| N | Q39ZB0 | CC | The immediate electron acceptor for the enzyme in this species is believed to be ubiquinone                                                                                                                                             |
| N | Q39ZB0 | DE | NADH dehydrogenase I subunit K 1;                                                                                                                                                                                                       |
| N | Q39ZB0 | DE | NADH-quinone oxidoreductase subunit K 1;                                                                                                                                                                                                |
| N | Q39ZB0 | DE | NDH-1 subunit K 1;                                                                                                                                                                                                                      |
| N | Q39ZB0 | DR | ATP synthesis coupled electron transport                                                                                                                                                                                                |
| N | Q39ZB0 | DR | NADH dehydrogenase (quinone) activity                                                                                                                                                                                                   |
| N | Q39ZB0 | DR | quinone binding                                                                                                                                                                                                                         |
| N | Q3A4N9 | DE | Phenylalanine--tRNA ligase alpha chain;                                                                                                                                                                                                 |
| N | Q3A4N9 | DE | Phenylalanyl-tRNA synthetase alpha chain;                                                                                                                                                                                               |
| N | Q3A4N9 | DR | metal ion binding                                                                                                                                                                                                                       |
| N | Q3A4N9 | DR | phenylalanine-tRNA ligase activity                                                                                                                                                                                                      |
| N | Q3A4N9 | DR | phenylalanyl-tRNA aminoacylation                                                                                                                                                                                                        |

|   |        |    |                                                                                                                                                                                                                  |
|---|--------|----|------------------------------------------------------------------------------------------------------------------------------------------------------------------------------------------------------------------|
| N | Q3A6R6 | CC | Catalyzes the attachment of proline to tRNA(Pro) in a two-step reaction: proline is first activated by ATP to form Pro- AMP and then transferred to the acceptor end of tRNA(Pro)                                |
| N | Q3A6R6 | CC | As ProRS can inadvertently accommodate and process non-cognate amino acids such as alanine and cysteine, to avoid such errors it has two additional distinct editing activities against alanine                  |
| N | Q3A6R6 | CC | One activity is designated as 'pretransfer' editing and involves the tRNA(Pro)-independent hydrolysis of activated Ala-AMP                                                                                       |
| N | Q3A6R6 | CC | The misacylated Cys- tRNA(Pro) is not edited by ProRS (By similarity).                                                                                                                                           |
| N | Q3A6R6 | CC | The other activity is designated 'posttransfer' editing and involves deacylation of mischarged Ala-tRNA(Pro)                                                                                                     |
| N | Q3A6R6 | DE | Proline--tRNA ligase;                                                                                                                                                                                            |
| N | Q3A6R6 | DE | Prolyl-tRNA synthetase;                                                                                                                                                                                          |
| N | Q3A6R6 | DR | proline-tRNA ligase activity                                                                                                                                                                                     |
| N | Q3A6R6 | DR | prolyl-tRNA aminoacylation                                                                                                                                                                                       |
| N | Q3ABS6 | DE | Threonine--tRNA ligase;                                                                                                                                                                                          |
| N | Q3ABS6 | DE | Threonyl-tRNA synthetase;                                                                                                                                                                                        |
| N | Q3ABS6 | DR | metal ion binding                                                                                                                                                                                                |
| N | Q3ABS6 | DR | threonine-tRNA ligase activity                                                                                                                                                                                   |
| N | Q3ABS6 | DR | threonyl-tRNA aminoacylation                                                                                                                                                                                     |
| N | Q3AC47 | DE | Acetate kinase;                                                                                                                                                                                                  |
| N | Q3AC47 | DE | Acetokinase;                                                                                                                                                                                                     |
| N | Q3AC47 | DR | acetate kinase activity                                                                                                                                                                                          |
| N | Q3AC47 | DR | organic acid metabolic process                                                                                                                                                                                   |
| N | Q3AFM4 | CC | Catalyzes the phosphorylation of the position 2 hydroxy group of 4-diphosphocytidyl-2C-methyl-D-erythritol (By similarity).                                                                                      |
| N | Q3AFM4 | DE | 4-(cytidine-5'-diphospho)-2-C-methyl-D-erythritol kinase;                                                                                                                                                        |
| N | Q3AFM4 | DE | 4-diphosphocytidyl-2-C-methyl-D-erythritol kinase;                                                                                                                                                               |
| N | Q3AFM4 | DR | 4-(cytidine 5'-diphospho)-2-C-methyl-D-erythritol kinase activity                                                                                                                                                |
| N | Q3AFM4 | DR | terpenoid biosynthetic process                                                                                                                                                                                   |
| N | Q3AHR1 | DE | UPF0082 protein Sync9605_2132;                                                                                                                                                                                   |
| N | Q3AIH3 | DE | UDP-3-O-[3-hydroxymyristoyl] glucosamine N-acyltransferase;                                                                                                                                                      |
| N | Q3AIH3 | DR | acyltransferase activity                                                                                                                                                                                         |
| N | Q3AIH3 | DR | lipid A biosynthetic process                                                                                                                                                                                     |
| N | Q3ALS4 | DE | Acetylglutamate kinase;                                                                                                                                                                                          |
| N | Q3ALS4 | DE | N-acetyl-L-glutamate 5-phosphotransferase;                                                                                                                                                                       |
| N | Q3ALS4 | DR | acetylglutamate kinase activity                                                                                                                                                                                  |
| N | Q3ALS4 | DR | arginine biosynthetic process                                                                                                                                                                                    |
| N | Q3ALS4 | DR | glutamate 5-kinase activity                                                                                                                                                                                      |
| N | Q3ALS4 | DR | proline biosynthetic process                                                                                                                                                                                     |
| N | Q3AN03 | CC | Interconversion of serine and glycine.                                                                                                                                                                           |
| N | Q3AN03 | DE | Serine hydroxymethyltransferase;                                                                                                                                                                                 |
| N | Q3AN03 | DE | Serine methylase;                                                                                                                                                                                                |
| N | Q3AN03 | DR | L-serine metabolic process                                                                                                                                                                                       |
| N | Q3AN03 | DR | glycine hydroxymethyltransferase activity                                                                                                                                                                        |
| N | Q3AN03 | DR | glycine metabolic process                                                                                                                                                                                        |
| N | Q3AN03 | DR | one-carbon metabolic process                                                                                                                                                                                     |
| N | Q3AN03 | DR | pyridoxal phosphate binding                                                                                                                                                                                      |
| N | Q3AS97 | DE | 50S ribosomal protein L27;                                                                                                                                                                                       |
| N | Q3AS97 | DR | structural constituent of ribosome                                                                                                                                                                               |
| N | Q3AT62 | DE | 1-(5-phosphoribosyl)-5-[(5-phosphoribosylamino)methylideneamino] imidazole-4-carboxamide isomerase;                                                                                                              |
| N | Q3AT62 | DE | Phosphoribosylformimino-5-aminoimidazole carboxamide ribotide isomerase;                                                                                                                                         |
| N | Q3AT62 | DR | 1-(5-phosphoribosyl)-5-[(5-phosphoribosylamino)methylideneamino]imidazole-4-carboxamide isomerase activity                                                                                                       |
| N | Q3AT62 | DR | histidine biosynthetic process                                                                                                                                                                                   |
| N | Q3AZM2 | CC | F(1)F(0) ATP synthase produces ATP from ADP in the presence of a proton or sodium gradient                                                                                                                       |
| N | Q3AZM2 | CC | During catalysis, ATP synthesis in the catalytic domain of F(1) is coupled via a rotary mechanism of the central stalk subunits to proton translocation (By similarity)                                          |
| N | Q3AZM2 | CC | F-type ATPases consist of two structural domains, F(1) containing the extramembraneous catalytic core and F(0) containing the membrane proton channel, linked together by a central stalk and a peripheral stalk |
| N | Q3AZM2 | DE | ATP synthase F(1) sector subunit delta;                                                                                                                                                                          |
| N | Q3AZM2 | DE | ATP synthase subunit delta;                                                                                                                                                                                      |



|   |        |    |                                                                                                                                                                                                                 |
|---|--------|----|-----------------------------------------------------------------------------------------------------------------------------------------------------------------------------------------------------------------|
| N | Q3AZM2 | DE | F-ATPase subunit delta;                                                                                                                                                                                         |
| N | Q3AZM2 | DE | F-type ATPase subunit delta;                                                                                                                                                                                    |
| N | Q3AZM2 | DR | ATP synthesis coupled proton transport                                                                                                                                                                          |
| N | Q3AZM2 | DR | hydrogen ion transporting ATP synthase activity, rotational mechanism                                                                                                                                           |
| N | Q3B1H3 | CC | This protein binds directly to 23S ribosomal RNA (By similarity).                                                                                                                                               |
| N | Q3B1H3 | DE | 50S ribosomal protein L11;                                                                                                                                                                                      |
| N | Q3B1H3 | DR | structural constituent of ribosome                                                                                                                                                                              |
| N | Q3B213 | CC | Catalyzes the 1,3-allylic rearrangement of the homoallylic substrate isopentenyl (IPP) to its allylic isomer, dimethylallyl diphosphate (DMAPP) (By similarity).                                                |
| N | Q3B213 | DE | IPP isomerase;                                                                                                                                                                                                  |
| N | Q3B213 | DE | Isopentenyl pyrophosphate isomerase;                                                                                                                                                                            |
| N | Q3B213 | DE | Isopentenyl-diphosphate delta-isomerase;                                                                                                                                                                        |
| N | Q3B213 | DR | isopentenyl-diphosphate delta-isomerase activity                                                                                                                                                                |
| N | Q3B213 | DR | isoprenoid biosynthetic process                                                                                                                                                                                 |
| N | Q3B213 | DR | oxidoreductase activity                                                                                                                                                                                         |
| N | Q3B2T5 | CC | Participates actively in the response to hyperosmotic and heat shock by preventing the aggregation of stress-denatured proteins and by disaggregating proteins, also in an autonomous, dnaK-independent fashion |
| N | Q3B2T5 | CC | Also involved, together with dnaK and grpE, in the DNA replication of plasmids through activation of initiation proteins (By similarity).                                                                       |
| N | Q3B2T5 | CC | GrpE releases ADP from dnaK; ATP binding to dnaK triggers the release of the substrate protein, thus completing the reaction cycle                                                                              |
| N | Q3B2T5 | CC | Several rounds of ATP-dependent interactions between dnaJ, dnaK and grpE are required for fully efficient folding                                                                                               |
| N | Q3B2T5 | CC | Unfolded proteins bind initially to dnaJ; upon interaction with the dnaJ-bound protein, dnaK hydrolyzes its bound ATP, resulting in the formation of a stable complex                                           |
| N | Q3B2T5 | DE | Chaperone protein dnaJ;                                                                                                                                                                                         |
| N | Q3B2T5 | DR | DNA replication                                                                                                                                                                                                 |
| N | Q3B2T5 | DR | heat shock protein binding                                                                                                                                                                                      |
| N | Q3B2T5 | DR | metal ion binding                                                                                                                                                                                               |
| N | Q3B2T5 | DR | protein folding                                                                                                                                                                                                 |
| N | Q3B2T5 | DR | response to heat                                                                                                                                                                                                |
| N | Q3B2T5 | DR | unfolded protein binding                                                                                                                                                                                        |
| N | Q3B4B5 | CC | Presumably involved in the processing and regular turnover of intracellular proteins                                                                                                                            |
| N | Q3B4B5 | CC | Catalyzes the removal of unsubstituted N-terminal amino acids from various peptides (By similarity).                                                                                                            |
| N | Q3B4B5 | DE | Leucine aminopeptidase;                                                                                                                                                                                         |
| N | Q3B4B5 | DE | Leucyl aminopeptidase;                                                                                                                                                                                          |
| N | Q3B4B5 | DE | Probable cytosol aminopeptidase;                                                                                                                                                                                |
| N | Q3B4B5 | DR | aminopeptidase activity                                                                                                                                                                                         |
| N | Q3B4B5 | DR | manganese ion binding                                                                                                                                                                                           |
| N | Q3B4B5 | DR | metalloexopeptidase activity                                                                                                                                                                                    |
| N | Q3B5J2 | CC | Catalyzes the interconversion of 2-phosphoglycerate and 3-phosphoglycerate (By similarity).                                                                                                                     |
| N | Q3B5J2 | DE | 2,3-bisphosphoglycerate-dependent phosphoglycerate mutase;                                                                                                                                                      |
| N | Q3B5J2 | DE | BPG-dependent PGAM;                                                                                                                                                                                             |
| N | Q3B5J2 | DE | Phosphoglyceromutase;                                                                                                                                                                                           |
| N | Q3B5J2 | DR | phosphoglycerate mutase activity                                                                                                                                                                                |
| N | Q3BAR4 | CC | This is one of the two reaction center proteins of photosystem II (By similarity).                                                                                                                              |
| N | Q3BAR4 | DE | 32 kDa thylakoid membrane protein;                                                                                                                                                                              |
| N | Q3BAR4 | DE | Photosystem II protein D1;                                                                                                                                                                                      |
| N | Q3BAR4 | DE | Photosystem Q(B) protein;                                                                                                                                                                                       |
| N | Q3BAR4 | DR | electron transporter, transferring electrons within the cyclic electron transport pathway of photosynthesis activity                                                                                            |
| N | Q3BAR4 | DR | metal ion binding                                                                                                                                                                                               |
| N | Q3BAR4 | DR | photosynthetic electron transport in photosystem II                                                                                                                                                             |
| N | Q3BAR4 | DR | response to herbicide                                                                                                                                                                                           |
| N | Q3BRK2 | DE | Phosphatidylserine decarboxylase alpha chain;                                                                                                                                                                   |
| N | Q3BRK2 | DE | Phosphatidylserine decarboxylase beta chain;                                                                                                                                                                    |
| N | Q3BRK2 | DE | Phosphatidylserine decarboxylase proenzyme;                                                                                                                                                                     |
| N | Q3BRK2 | DR | phosphatidylserine decarboxylase activity                                                                                                                                                                       |
| N | Q3BRK2 | DR | phospholipid biosynthetic process                                                                                                                                                                               |
| N | Q3BRL8 | CC | Component of the acetyl coenzyme A carboxylase (ACC) complex                                                                                                                                                    |

|   |        |    |                                                                                                                                                                                                                |
|---|--------|----|----------------------------------------------------------------------------------------------------------------------------------------------------------------------------------------------------------------|
| N | Q3BRL8 | CC | Biotin carboxylase (BC) catalyzes the carboxylation of biotin on its carrier protein (BCCP) and then the CO(2) group is transferred by the transcarboxylase to acetyl-CoA to form malonyl-CoA (By similarity). |
| N | Q3BRL8 | DE | ACCase subunit beta;                                                                                                                                                                                           |
| N | Q3BRL8 | DE | Acetyl-CoA carboxylase carboxyltransferase subunit beta;                                                                                                                                                       |
| N | Q3BRL8 | DE | Acetyl-coenzyme A carboxylase carboxyl transferase subunit beta;                                                                                                                                               |
| N | Q3BRL8 | DR | acetyl-CoA carboxylase activity                                                                                                                                                                                |
| N | Q3BRL8 | DR | fatty acid biosynthetic process                                                                                                                                                                                |
| N | Q3BRL8 | DR | metal ion binding                                                                                                                                                                                              |
| N | Q3BUF6 | DE | Histidinol-phosphate aminotransferase;                                                                                                                                                                         |
| N | Q3BUF6 | DE | Imidazole acetol-phosphate transaminase;                                                                                                                                                                       |
| N | Q3BUF6 | DR | histidine biosynthetic process                                                                                                                                                                                 |
| N | Q3BUF6 | DR | histidinol-phosphate transaminase activity                                                                                                                                                                     |
| N | Q3BUF6 | DR | pyridoxal phosphate binding                                                                                                                                                                                    |
| N | Q3BXC4 | CC | Forms oxaloacetate, a four-carbon dicarboxylic acid source for the tricarboxylic acid cycle.                                                                                                                   |
| N | Q3BXC4 | DE | Phosphoenolpyruvate carboxylase;                                                                                                                                                                               |
| N | Q3BXC4 | DR | carbon fixation                                                                                                                                                                                                |
| N | Q3BXC4 | DR | phosphoenolpyruvate carboxylase activity                                                                                                                                                                       |
| N | Q3BXC4 | DR | tricarboxylic acid cycle                                                                                                                                                                                       |
| N | Q3BYD2 | DE | Phosphoribosylaminoimidazole-succinocarboxamide synthase;                                                                                                                                                      |
| N | Q3BYD2 | DE | SAICAR synthetase;                                                                                                                                                                                             |
| N | Q3BYD2 | DR | phosphoribosylaminoimidazolesuccinocarboxamide synthase activity                                                                                                                                               |
| N | Q3BYD2 | DR | purine nucleotide biosynthetic process                                                                                                                                                                         |
| N | Q3E740 | DE | Uncharacterized protein YGL258W-A;                                                                                                                                                                             |
| N | Q3E740 | DR | aspartic-type endopeptidase activity                                                                                                                                                                           |
| N | Q3EDD7 | DE | Probable protein cornichon homolog 2;                                                                                                                                                                          |
| N | Q3EDD7 | DR | intracellular signal transduction                                                                                                                                                                              |
| N | Q3HM41 | CC | Involved in transcription initiation and cap-stealing mechanism, in which cellular capped pre-mRNA are used to generate primers for viral transcription                                                        |
| N | Q3HM41 | CC | Binds the cap of the target pre- RNA which is subsequently cleaved by PB1                                                                                                                                      |
| N | Q3HM41 | CC | May play a role in genome replication (By similarity).                                                                                                                                                         |
| N | Q3HM41 | DE | Polymerase basic protein 2;                                                                                                                                                                                    |
| N | Q3HM41 | DE | RNA-directed RNA polymerase subunit P3;                                                                                                                                                                        |
| N | Q3HM41 | DR | RNA-directed RNA polymerase activity                                                                                                                                                                           |
| N | Q3IFT7 | CC | Catalyzes the NAD-dependent reduction of succinylglutamate semialdehyde into succinylglutamate (By similarity).                                                                                                |
| N | Q3IFT7 | DE | N-succinylglutamate 5-semialdehyde dehydrogenase 1;                                                                                                                                                            |
| N | Q3IFT7 | DE | Succinylglutamic semialdehyde dehydrogenase 1;                                                                                                                                                                 |
| N | Q3IFT7 | DR | arginine catabolic process                                                                                                                                                                                     |
| N | Q3IFT7 | DR | oxidation-reduction process                                                                                                                                                                                    |
| N | Q3IFT7 | DR | succinylglutamate-semialdehyde dehydrogenase activity                                                                                                                                                          |
| N | Q3IHN9 | CC | NQR complex catalyzes the reduction of ubiquinone-1 to ubiquinol by two successive reactions, coupled with the transport of Na(+) ions from the cytoplasm to the periplasm.                                    |
| N | Q3IHN9 | CC | NqrA to nqrE are probably involved in the second step, the conversion of ubisemiquinone to ubiquinol (By similarity).                                                                                          |
| N | Q3IHN9 | DE | NQR complex subunit E;                                                                                                                                                                                         |
| N | Q3IHN9 | DE | NQR-1 subunit E;                                                                                                                                                                                               |
| N | Q3IHN9 | DE | Na(+)-NQR subunit E;                                                                                                                                                                                           |
| N | Q3IHN9 | DE | Na(+)-translocating NADH-quinone reductase subunit E;                                                                                                                                                          |
| N | Q3IHN9 | DE | Na(+)-translocating NQR subunit E;                                                                                                                                                                             |
| N | Q3IHN9 | DR | oxidoreductase activity, acting on NADH or NADPH, quinone or similar compound as acceptor                                                                                                                      |
| N | Q3IHN9 | DR | respiratory electron transport chain                                                                                                                                                                           |
| N | Q3IHN9 | DR | sodium ion transport                                                                                                                                                                                           |
| N | Q3II81 | CC | Binds as a heterodimer with protein S6 to the central domain of the 16S rRNA, where it helps stabilize the platform of the 30S subunit (By similarity).                                                        |
| N | Q3II81 | DE | 30S ribosomal protein S18;                                                                                                                                                                                     |
| N | Q3II81 | DR | structural constituent of ribosome                                                                                                                                                                             |
| N | Q3IJS5 | CC | Catalyzes the isomerization between 2-isopropylmalate and 3-isopropylmalate, via the formation of 2-isopropylmaleate.                                                                                          |
| N | Q3IJS5 | DE | 3-isopropylmalate dehydratase small subunit;                                                                                                                                                                   |
| N | Q3IJS5 | DE | Alpha-IPM isomerase;                                                                                                                                                                                           |
| N | Q3IJS5 | DE | Isopropylmalate isomerase;                                                                                                                                                                                     |
| N | Q3IJS5 | DR | 3-isopropylmalate dehydratase activity                                                                                                                                                                         |

|   |        |    |                                                                                                                                                                      |
|---|--------|----|----------------------------------------------------------------------------------------------------------------------------------------------------------------------|
| N | Q3IJS5 | DR | leucine biosynthetic process                                                                                                                                         |
| N | Q3IKE8 | CC | Catalyzes the ATP-dependent conversion of 7-carboxy-7- deazaguanine (CDG) to 7-cyano-7-deazaguanine (preQ(0)) (By similarity).                                       |
| N | Q3IKE8 | DE | 7-cyano-7-carbaguanine synthase;                                                                                                                                     |
| N | Q3IKE8 | DE | 7-cyano-7-deazaguanine synthase;                                                                                                                                     |
| N | Q3IKE8 | DE | PreQ(0) synthase;                                                                                                                                                    |
| N | Q3IKE8 | DE | Queuosine biosynthesis protein queC;                                                                                                                                 |
| N | Q3IKE8 | DR | ligase activity                                                                                                                                                      |
| N | Q3IKE8 | DR | metal ion binding                                                                                                                                                    |
| N | Q3IKE8 | DR | queuosine biosynthetic process                                                                                                                                       |
| N | Q3IKQ1 | CC | Catalyzes the reversible transfer of the terminal phosphate group between ATP and AMP                                                                                |
| N | Q3IKQ1 | CC | This small ubiquitous enzyme involved in the energy metabolism and nucleotide synthesis, is essential for maintenance and cell growth (By similarity).               |
| N | Q3IKQ1 | DE | ATP-AMP transphosphorylase;                                                                                                                                          |
| N | Q3IKQ1 | DE | Adenylate kinase;                                                                                                                                                    |
| N | Q3IKQ1 | DR | adenylate kinase activity                                                                                                                                            |
| N | Q3IKQ1 | DR | nucleotide biosynthetic process                                                                                                                                      |
| N | Q3IMV8 | DE | CMP kinase;                                                                                                                                                          |
| N | Q3IMV8 | DE | Cytidine monophosphate kinase;                                                                                                                                       |
| N | Q3IMV8 | DE | Cytidylate kinase;                                                                                                                                                   |
| N | Q3IMV8 | DR | cytidylate kinase activity                                                                                                                                           |
| N | Q3IMV8 | DR | shikimate kinase activity                                                                                                                                            |
| N | Q3IZG8 | CC | Binds specifically to the ssrA RNA (tmRNA) and is required for stable association of ssrA with ribosomes (By similarity).                                            |
| N | Q3IZG8 | DE | SsrA-binding protein;                                                                                                                                                |
| N | Q3J2B9 | CC | Specifically dimethylates two adjacent adenosines (A1518 and A1519) in the loop of a conserved hairpin near the 3'-end of 16S rRNA in the 30S particle               |
| N | Q3J2B9 | CC | May play a critical role in biogenesis of 30S subunits (By similarity).                                                                                              |
| N | Q3J2B9 | DE | 16S rRNA (adenine(1518)-N(6)/adenine(1519)-N(6))-dimethyltransferase;                                                                                                |
| N | Q3J2B9 | DE | 16S rRNA dimethyladenosine transferase;                                                                                                                              |
| N | Q3J2B9 | DE | 16S rRNA dimethylase;                                                                                                                                                |
| N | Q3J2B9 | DE | Ribosomal RNA small subunit methyltransferase A;                                                                                                                     |
| N | Q3J2B9 | DE | S-adenosylmethionine-6-N', N'-adenosyl(rRNA) dimethyltransferase;                                                                                                    |
| N | Q3J2B9 | DR | rRNA (adenine-N6,N6-)-dimethyltransferase activity                                                                                                                   |
| N | Q3J5R9 | CC | One of the primary rRNA binding proteins                                                                                                                             |
| N | Q3J5R9 | CC | it has been suggested to have peptidyl transferase activity, this is somewhat controversial                                                                          |
| N | Q3J5R9 | CC | Makes several contacts with the 16S rRNA in the 70S ribosome (By similarity).                                                                                        |
| N | Q3J5R9 | CC | Required for association of the 30S and 50S subunits to form the 70S ribosome, for tRNA binding and peptide bond formation                                           |
| N | Q3J5R9 | DE | 50S ribosomal protein L2;                                                                                                                                            |
| N | Q3J5R9 | DR | structural constituent of ribosome                                                                                                                                   |
| N | Q3J5R9 | DR | transferase activity                                                                                                                                                 |
| N | Q3J787 | CC | Cell wall formation                                                                                                                                                  |
| N | Q3J787 | CC | Catalyzes the addition of glutamate to the nucleotide precursor UDP-N-acetylmuramoyl-L-alanine (UMA) (By similarity).                                                |
| N | Q3J787 | DE | D-glutamic acid-adding enzyme;                                                                                                                                       |
| N | Q3J787 | DE | UDP-N-acetylmuramoyl-L-alanyl-D-glutamate synthetase;                                                                                                                |
| N | Q3J787 | DE | UDP-N-acetylmuramoylalanine--D-glutamate ligase;                                                                                                                     |
| N | Q3J787 | DR | UDP-N-acetylmuramoylalanine-D-glutamate ligase activity                                                                                                              |
| N | Q3J787 | DR | cell division                                                                                                                                                        |
| N | Q3J787 | DR | cellular cell wall organization                                                                                                                                      |
| N | Q3J787 | DR | peptidoglycan biosynthetic process                                                                                                                                   |
| N | Q3J787 | DR | regulation of cell shape                                                                                                                                             |
| N | Q3J7D1 | CC | Catalyzes the conversion of 5-methoxyuridine (mo5U) to uridine-5-oxyacetic acid (cmo5U) at position 34 in tRNA                                                       |
| N | Q3J7D1 | CC | May also participate in the methylation of uridine-5-oxyacetic acid (cmo5U) to uridine-5-oxyacetic acid methyl ester (mcmo5U) (By similarity).                       |
| N | Q3J7D1 | DE | tRNA (cmo5U34)-methyltransferase;                                                                                                                                    |
| N | Q3J7D1 | DR | tRNA (uracil) methyltransferase activity                                                                                                                             |
| N | Q3J7D1 | DR | tRNA wobble uridine modification                                                                                                                                     |
| N | Q3J7H0 | CC | Catalyzes the condensation of ATP and 5-phosphoribose 1- diphosphate to form N'-(5'-phosphoribosyl)-ATP (PR-ATP)                                                     |
| N | Q3J7H0 | CC | has a crucial role in the pathway because the rate of misuine biosynthesis seems to be controlled primarily by regulation of hisG enzymatic activity (By similarity) |

|   |        |    |                                                                                                                                                                                                                                 |
|---|--------|----|---------------------------------------------------------------------------------------------------------------------------------------------------------------------------------------------------------------------------------|
| N | Q3J7H0 | DE | ATP phosphoribosyltransferase;                                                                                                                                                                                                  |
| N | Q3J7H0 | DE | ATP-PRTase;                                                                                                                                                                                                                     |
| N | Q3J7H0 | DR | ATP phosphoribosyltransferase activity                                                                                                                                                                                          |
| N | Q3J7H0 | DR | histidine biosynthetic process                                                                                                                                                                                                  |
| N | Q3J7H2 | DE | Histidinol-phosphate aminotransferase 2;                                                                                                                                                                                        |
| N | Q3J7H2 | DE | Imidazole acetol-phosphate transaminase 2;                                                                                                                                                                                      |
| N | Q3J7H2 | DR | histidine biosynthetic process                                                                                                                                                                                                  |
| N | Q3J7H2 | DR | histidinol-phosphate transaminase activity                                                                                                                                                                                      |
| N | Q3J7H2 | DR | pyridoxal phosphate binding                                                                                                                                                                                                     |
| N | Q3J7W3 | CC | Catalyzes the transfer of endogenously produced octanoic acid from octanoyl-acyl-carrier-protein onto the lipoyl domains of lipoate-dependent enzymes                                                                           |
| N | Q3J7W3 | CC | Lipoyl-ACP can also act as a substrate although octanoyl-ACP is likely to be the physiological substrate (By similarity).                                                                                                       |
| N | Q3J7W3 | DE | Lipoate-protein ligase B;                                                                                                                                                                                                       |
| N | Q3J7W3 | DE | Lipoyl/octanoyl transferase;                                                                                                                                                                                                    |
| N | Q3J7W3 | DE | Octanoyl-[acyl-carrier-protein]-protein N-octanoyltransferase;                                                                                                                                                                  |
| N | Q3J7W3 | DE | Octanoyltransferase;                                                                                                                                                                                                            |
| N | Q3J7W3 | DR | lipoate biosynthetic process                                                                                                                                                                                                    |
| N | Q3J7W3 | DR | lipoyl(octanoyl) transferase activity                                                                                                                                                                                           |
| N | Q3J7W3 | DR | octanoyltransferase activity                                                                                                                                                                                                    |
| N | Q3J7W3 | DR | protein modification process                                                                                                                                                                                                    |
| N | Q3J869 | DE | Dihydrodipicolinate synthase;                                                                                                                                                                                                   |
| N | Q3J869 | DR | diaminopimelate biosynthetic process                                                                                                                                                                                            |
| N | Q3J869 | DR | dihydrodipicolinate synthase activity                                                                                                                                                                                           |
| N | Q3JCZ3 | CC | Catalyzes the methyl esterification of L-isoaspartyl residues in peptides and proteins that result from spontaneous decomposition of normal L-aspartyl and L-isoaspartyl residues                                               |
| N | Q3JCZ3 | CC | It plays a role in the repair and/or degradation of damaged proteins (By similarity)                                                                                                                                            |
| N | Q3JCZ3 | DE | L-isoaspartyl protein carboxyl methyltransferase 1;                                                                                                                                                                             |
| N | Q3JCZ3 | DE | Protein L-isoaspartyl methyltransferase 1;                                                                                                                                                                                      |
| N | Q3JCZ3 | DE | Protein-L-isoaspartate O-methyltransferase 1;                                                                                                                                                                                   |
| N | Q3JCZ3 | DE | Protein-beta-aspartate methyltransferase 1;                                                                                                                                                                                     |
| N | Q3JCZ3 | DR | protein-L-isoaspartate (D-aspartate) O-methyltransferase activity                                                                                                                                                               |
| N | Q3JST3 | DE | Phosphoriboisomerase A;                                                                                                                                                                                                         |
| N | Q3JST3 | DE | Ribose-5-phosphate isomerase A;                                                                                                                                                                                                 |
| N | Q3JST3 | DR | pentose-phosphate shunt, non-oxidative branch                                                                                                                                                                                   |
| N | Q3JST3 | DR | ribose-5-phosphate isomerase activity                                                                                                                                                                                           |
| N | Q3JUJ4 | CC | Catalyzes two reactions: the first one is the production of beta-formyl glycine from formate, ATP and beta-GAR; the second, a side reaction, is the production of acetyl phosphate and ADP from acetate and ATP (By similarity) |
| N | Q3JUJ4 | DE | 5'-phosphoribosylglycinamide transformylase 2;                                                                                                                                                                                  |
| N | Q3JUJ4 | DE | Formate-dependent GAR transformylase;                                                                                                                                                                                           |
| N | Q3JUJ4 | DE | GAR transformylase 2;                                                                                                                                                                                                           |
| N | Q3JUJ4 | DE | Phosphoribosylglycinamide formyltransferase 2;                                                                                                                                                                                  |
| N | Q3JUJ4 | DR | hydroxymethyl-, formyl- and related transferase activity                                                                                                                                                                        |
| N | Q3JUJ4 | DR | ligase activity                                                                                                                                                                                                                 |
| N | Q3JUJ4 | DR | magnesium ion binding                                                                                                                                                                                                           |
| N | Q3JUJ4 | DR | purine ribonucleotide biosynthetic process                                                                                                                                                                                      |
| N | Q3JUY1 | CC | Is required not only for elongation of protein synthesis but also for the initiation of all mRNA translation through initiator tRNA(fMet) aminoacylation (By similarity)                                                        |
| N | Q3JUY1 | DE | Methionine--tRNA ligase;                                                                                                                                                                                                        |
| N | Q3JUY1 | DE | Methionyl-tRNA synthetase;                                                                                                                                                                                                      |
| N | Q3JUY1 | DR | metal ion binding                                                                                                                                                                                                               |
| N | Q3JUY1 | DR | methionine-tRNA ligase activity                                                                                                                                                                                                 |
| N | Q3JUY1 | DR | methionyl-tRNA aminoacylation                                                                                                                                                                                                   |
| N | Q3JXS3 | CC | ATP-dependent carboxylate-amine ligase (By similarity).                                                                                                                                                                         |
| N | Q3JXS3 | DE | Carboxylate-amine ligase BURPS1710b_0214;                                                                                                                                                                                       |
| N | Q3JXS3 | DR | glutamate-cysteine ligase activity                                                                                                                                                                                              |
| N | Q3JXS3 | DR | glutathione biosynthetic process                                                                                                                                                                                                |
| N | Q3K0Y6 | CC | Part of the ABC transporter complex PotABCD involved in spermidine/putrescine import                                                                                                                                            |
| N | Q3K0Y6 | CC | Responsible for energy coupling to the transport system (By similarity).                                                                                                                                                        |
| N | Q3K0Y6 | DE | Spermidine/putrescine import ATP-binding protein PotA;                                                                                                                                                                          |
| N | Q3K0Y6 | DR | polyamine-transporting ATPase activity                                                                                                                                                                                          |
| N | Q3K1B8 | CC | Catalyzes the folate-dependent formation of 5-methyl-uridine at position 54 (M5-U54) in all tRNAs (By similarity).                                                                                                              |

|   |        |    |                                                                                                                                                                                                                                                                                                                                             |
|---|--------|----|---------------------------------------------------------------------------------------------------------------------------------------------------------------------------------------------------------------------------------------------------------------------------------------------------------------------------------------------|
| N | Q3K1B8 | DE | Folate-dependent tRNA (uracil-5-)-methyltransferase;                                                                                                                                                                                                                                                                                        |
| N | Q3K1B8 | DE | Folate-dependent tRNA(M-5-U54)-methyltransferase;                                                                                                                                                                                                                                                                                           |
| N | Q3K1B8 | DE | Methylenetetrahydrofolate--tRNA-(uracil-5-)-methyltransferase TrmFO;                                                                                                                                                                                                                                                                        |
| N | Q3K1B8 | DR | flavin adenine dinucleotide binding                                                                                                                                                                                                                                                                                                         |
| N | Q3K1B8 | DR | methylenetetrahydrofolate-tRNA-(uracil-5-)-methyltransferase (FADH2-oxidizing) activity                                                                                                                                                                                                                                                     |
| N | Q3K1B8 | DR | tRNA processing                                                                                                                                                                                                                                                                                                                             |
| N | Q3K1L5 | CC | Cell wall formation                                                                                                                                                                                                                                                                                                                         |
| N | Q3K1L5 | CC | Adds enolpyruvyl to UDP-N- acetylglucosamine (By similarity).                                                                                                                                                                                                                                                                               |
| N | Q3K1L5 | DE | Enolpyruvate transferase 1;                                                                                                                                                                                                                                                                                                                 |
| N | Q3K1L5 | DE | UDP-N-acetylglucosamine 1-carboxyvinyltransferase 1;                                                                                                                                                                                                                                                                                        |
| N | Q3K1L5 | DE | UDP-N-acetylglucosamine enolpyruvyl transferase 1;                                                                                                                                                                                                                                                                                          |
| N | Q3K1L5 | DR | UDP-N-acetylgalactosamine biosynthetic process                                                                                                                                                                                                                                                                                              |
| N | Q3K1L5 | DR | UDP-N-acetylglucosamine 1-carboxyvinyltransferase activity                                                                                                                                                                                                                                                                                  |
| N | Q3K1L5 | DR | cell division                                                                                                                                                                                                                                                                                                                               |
| N | Q3K1L5 | DR | cellular cell wall organization                                                                                                                                                                                                                                                                                                             |
| N | Q3K1L5 | DR | peptidoglycan biosynthetic process                                                                                                                                                                                                                                                                                                          |
| N | Q3K1L5 | DR | regulation of cell shape                                                                                                                                                                                                                                                                                                                    |
| N | Q3K4M8 | DE | UPF0758 protein Pfl01_5539;                                                                                                                                                                                                                                                                                                                 |
| N | Q3K5T0 | CC | hydrolyzes diadenosine 5',5''-P1,P4-tetraphosphate to yield ADP (By similarity)                                                                                                                                                                                                                                                             |
| N | Q3K5T0 | DE | Ap4A hydrolase;                                                                                                                                                                                                                                                                                                                             |
| N | Q3K5T0 | DE | Bis(5'-nucleosyl)-tetraphosphatase, symmetrical;                                                                                                                                                                                                                                                                                            |
| N | Q3K5T0 | DE | Diadenosine 5',5'''-P1,P4-tetraphosphate pyrophosphohydrolase;                                                                                                                                                                                                                                                                              |
| N | Q3K5T0 | DE | Diadenosine tetraphosphatase;                                                                                                                                                                                                                                                                                                               |
| N | Q3K5T0 | DR | bis(5'-nucleosyl)-tetraphosphatase (symmetrical) activity                                                                                                                                                                                                                                                                                   |
| N | Q3K6W5 | CC | Catalyzes the phosphorylation of the position 2 hydroxy group of 4-diphosphocytidyl-2C-methyl-D-erythritol (By similarity).                                                                                                                                                                                                                 |
| N | Q3K6W5 | DE | 4-(cytidine-5'-diphospho)-2-C-methyl-D-erythritol kinase;                                                                                                                                                                                                                                                                                   |
| N | Q3K6W5 | DE | 4-diphosphocytidyl-2-C-methyl-D-erythritol kinase;                                                                                                                                                                                                                                                                                          |
| N | Q3K6W5 | DR | 4-(cytidine 5'-diphospho)-2-C-methyl-D-erythritol kinase activity                                                                                                                                                                                                                                                                           |
| N | Q3K6W5 | DR | terpenoid biosynthetic process                                                                                                                                                                                                                                                                                                              |
| N | Q3KF35 | CC | Catalyzes the attachment of glutamate to tRNA(Glu) in a two-step reaction: glutamate is first activated by ATP to form Glu-AMP and then transferred to the acceptor end of tRNA(Glu) (By similarity).                                                                                                                                       |
| N | Q3KF35 | DE | Glutamate--tRNA ligase;                                                                                                                                                                                                                                                                                                                     |
| N | Q3KF35 | DE | Glutamyl-tRNA synthetase;                                                                                                                                                                                                                                                                                                                   |
| N | Q3KF35 | DR | glutamate-tRNA ligase activity                                                                                                                                                                                                                                                                                                              |
| N | Q3KF35 | DR | glutamyl-tRNA aminoacylation                                                                                                                                                                                                                                                                                                                |
| N | Q3KHY6 | DE | ATP-sulfurylase small subunit;                                                                                                                                                                                                                                                                                                              |
| N | Q3KHY6 | DE | Sulfate adenylate transferase;                                                                                                                                                                                                                                                                                                              |
| N | Q3KHY6 | DE | Sulfate adenyltransferase subunit 2;                                                                                                                                                                                                                                                                                                        |
| N | Q3KHY6 | DR | sulfate adenyltransferase (ATP) activity                                                                                                                                                                                                                                                                                                    |
| N | Q3KHY6 | DR | sulfate reduction                                                                                                                                                                                                                                                                                                                           |
| N | Q3KIX5 | CC | Binds to the 23S rRNA (By similarity).                                                                                                                                                                                                                                                                                                      |
| N | Q3KIX5 | DE | 50S ribosomal protein L9;                                                                                                                                                                                                                                                                                                                   |
| N | Q3KIX5 | DR | structural constituent of ribosome                                                                                                                                                                                                                                                                                                          |
| N | Q3LHN0 | CC | In the hair cortex, hair keratin intermediate filaments are embedded in an interfilamentous matrix, consisting of hair keratin-associated proteins (KRTAP), which are essential for the formation of a rigid and resistant hair shaft through their extensive disulfide bond cross-linking with abundant cysteine residues of hair keratine |
| N | Q3LHN0 | CC | The matrix proteins include the high- sulfur and high-glycine-tyrosine keratins (By similarity).                                                                                                                                                                                                                                            |
| N | Q3LHN0 | DE | Keratin-associated protein 25-1;                                                                                                                                                                                                                                                                                                            |
| N | Q3MA96 | CC | This protein specifically catalyzes the removal of signal peptides from prolipoproteins (By similarity).                                                                                                                                                                                                                                    |
| N | Q3MA96 | DE | Lipoprotein signal peptidase;                                                                                                                                                                                                                                                                                                               |
| N | Q3MA96 | DE | Prolipoprotein signal peptidase;                                                                                                                                                                                                                                                                                                            |
| N | Q3MA96 | DE | Signal peptidase II;                                                                                                                                                                                                                                                                                                                        |
| N | Q3MA96 | DR | aspartic-type endopeptidase activity                                                                                                                                                                                                                                                                                                        |
| N | Q3MBQ2 | CC | Phosphorylation of dTMP to form dTDP in both de novo and salvage pathways of dTTP synthesis (By similarity).                                                                                                                                                                                                                                |
| N | Q3MBQ2 | DE | Thymidylate kinase;                                                                                                                                                                                                                                                                                                                         |
| N | Q3MBQ2 | DE | dTMP kinase;                                                                                                                                                                                                                                                                                                                                |
| N | Q3MBQ2 | DR | dTDP biosynthetic process                                                                                                                                                                                                                                                                                                                   |
| N | Q3MBQ2 | DR | thymidylate kinase activity                                                                                                                                                                                                                                                                                                                 |

|   |        |    |                                                                                                                                                                                                                                         |
|---|--------|----|-----------------------------------------------------------------------------------------------------------------------------------------------------------------------------------------------------------------------------------------|
| N | Q3MGE7 | CC | DNA ligase that catalyzes the formation of phosphodiester linkages between 5'-phosphoryl and 3'-hydroxyl groups in double-stranded DNA using NAD as a coenzyme and as the energy source for the reaction                                |
| N | Q3MGE7 | CC | It is essential for DNA replication and repair of damaged DNA (By similarity).                                                                                                                                                          |
| N | Q3MGE7 | DE | Polydeoxyribonucleotide synthase [NAD+];                                                                                                                                                                                                |
| N | Q3MGE7 | DR | DNA ligase (NAD+) activity                                                                                                                                                                                                              |
| N | Q3MGE7 | DR | DNA replication                                                                                                                                                                                                                         |
| N | Q3MGE7 | DR | metal ion binding                                                                                                                                                                                                                       |
| N | Q3MHG7 | CC | Catalyzes the oxidation of uric acid to 5- hydroxyisourate, which is further processed to form (S)-allantoin (By similarity).                                                                                                           |
| N | Q3MHG7 | DE | Urate oxidase;                                                                                                                                                                                                                          |
| N | Q3MHG7 | DR | oxidation-reduction process                                                                                                                                                                                                             |
| N | Q3MHG7 | DR | purine base metabolic process                                                                                                                                                                                                           |
| N | Q3MHG7 | DR | urate oxidase activity                                                                                                                                                                                                                  |
| N | Q3MIF2 | CC | Putative Polycomb group (PcG) protein                                                                                                                                                                                                   |
| N | Q3MIF2 | CC | Binds histone H3 peptides that are monomethylated or dimethylated on 'Lys-4', 'Lys-9' or 'Lys-27' (By similarity).                                                                                                                      |
| N | Q3MIF2 | CC | Binds to monomethylated and dimethylated 'Lys-20' on histone H4                                                                                                                                                                         |
| N | Q3MIF2 | CC | Its association with a chromatin-remodeling complex suggests that it may contribute to prevent expression of genes that trigger the cell into mitosis                                                                                   |
| N | Q3MIF2 | CC | PcG proteins maintain the transcriptionally repressive state of genes, probably via a modification of chromatin, rendering it heritably changed in its expressibility                                                                   |
| N | Q3MIF2 | DE | L(3)mbt-like protein 2;                                                                                                                                                                                                                 |
| N | Q3MIF2 | DE | Lethal(3)malignant brain tumor-like protein 2;                                                                                                                                                                                          |
| N | Q3MIF2 | DR | chromatin modification                                                                                                                                                                                                                  |
| N | Q3MIF2 | DR | methylated histone residue binding                                                                                                                                                                                                      |
| N | Q3MIF2 | DR | zinc ion binding                                                                                                                                                                                                                        |
| N | Q3SJP4 | CC | NDH-1 shuttles electrons from NADH, via FMN and iron- sulfur (Fe-S) centers, to quinones in the respiratory chain                                                                                                                       |
| N | Q3SJP4 | CC | Couples the redox reaction to proton translocation (for every two electrons transferred, four hydrogen ions are translocated across the cytoplasmic membrane), and thus conserves the redox energy in a proton gradient (By similarity) |
| N | Q3SJP4 | CC | The immediate electron acceptor for the enzyme in this species is believed to be ubiquinone                                                                                                                                             |
| N | Q3SJP4 | DE | NADH dehydrogenase I subunit N;                                                                                                                                                                                                         |
| N | Q3SJP4 | DE | NADH-quinone oxidoreductase subunit N;                                                                                                                                                                                                  |
| N | Q3SJP4 | DE | NDH-1 subunit N;                                                                                                                                                                                                                        |
| N | Q3SJP4 | DR | ATP synthesis coupled electron transport                                                                                                                                                                                                |
| N | Q3SJP4 | DR | NADH dehydrogenase (ubiquinone) activity                                                                                                                                                                                                |
| N | Q3SJP4 | DR | quinone binding                                                                                                                                                                                                                         |
| N | Q3SK65 | DE | Glucose-6-phosphate isomerase 1;                                                                                                                                                                                                        |
| N | Q3SK65 | DE | Phosphoglucose isomerase 1;                                                                                                                                                                                                             |
| N | Q3SK65 | DE | Phosphohexose isomerase 1;                                                                                                                                                                                                              |
| N | Q3SK65 | DR | gluconeogenesis                                                                                                                                                                                                                         |
| N | Q3SK65 | DR | glucose-6-phosphate isomerase activity                                                                                                                                                                                                  |
| N | Q3SKN6 | CC | Responsible for the release of ribosomes from messenger RNA at the termination of protein biosynthesis                                                                                                                                  |
| N | Q3SKN6 | CC | May increase the efficiency of translation by recycling ribosomes from one round of translation to another (By similarity).                                                                                                             |
| N | Q3SKN6 | DE | Ribosome-recycling factor;                                                                                                                                                                                                              |
| N | Q3SKN6 | DE | Ribosome-releasing factor;                                                                                                                                                                                                              |
| N | Q3SLP9 | CC | One of the primary rRNA binding proteins, it binds directly near the 3'-end of the 23S rRNA, where it nucleates assembly of the 50S subunit (By similarity).                                                                            |
| N | Q3SLP9 | DE | 50S ribosomal protein L3;                                                                                                                                                                                                               |
| N | Q3SLP9 | DR | structural constituent of ribosome                                                                                                                                                                                                      |
| N | Q3SQN5 | DE | UPF0178 protein Nwi_2152;                                                                                                                                                                                                               |
| N | Q3SSR2 | CC | Catalyzes the oxidation of the C8 methyl side group on heme O porphyrin ring into a formyl group (By similarity).                                                                                                                       |
| N | Q3SSR2 | DE | Cytochrome aa3-controlling protein;                                                                                                                                                                                                     |
| N | Q3SSR2 | DE | Heme A synthase;                                                                                                                                                                                                                        |
| N | Q3SSR2 | DR | heme biosynthetic process                                                                                                                                                                                                               |
| N | Q3SSR2 | DR | oxidation-reduction process                                                                                                                                                                                                             |
| N | Q3SSR2 | DR | oxidoreductase activity                                                                                                                                                                                                                 |
| N | Q3SSR2 | DR | protein complex assembly                                                                                                                                                                                                                |

|   |        |    |                                                                                                                                                                                                                                                                                                                                                                                                                                                                                                                                                                                                                                                                                        |
|---|--------|----|----------------------------------------------------------------------------------------------------------------------------------------------------------------------------------------------------------------------------------------------------------------------------------------------------------------------------------------------------------------------------------------------------------------------------------------------------------------------------------------------------------------------------------------------------------------------------------------------------------------------------------------------------------------------------------------|
| N | Q3SWX8 | CC | Core histone-binding subunit that may target chromatin remodeling factors, histone acetyltransferases and histone deacetylases to their histone substrates in a manner that is regulated by nucleosomal DNA                                                                                                                                                                                                                                                                                                                                                                                                                                                                            |
| N | Q3SWX8 | CC | Component of several complexes which regulate chromatin metabolism. These include the type B histone acetyltransferase (HAT) complex, which is required for chromatin assembly following DNA replication; the core histone deacetylase (HDAC) complex, which promotes histone deacetylation and consequent transcriptional repression; the nucleosome remodeling and histone deacetylase complex (the NuRD complex), which promotes transcriptional repression by histone deacetylation and nucleosome remodeling; and the PRC2/EED-EZH2 complex, which promotes repression of homeotic genes during development; and the NURF (nucleosome remodeling factor) complex (Bv similarity). |
| N | Q3SWX8 | CC |                                                                                                                                                                                                                                                                                                                                                                                                                                                                                                                                                                                                                                                                                        |
| N | Q3SWX8 | DE | Histone-binding protein RBBP7;                                                                                                                                                                                                                                                                                                                                                                                                                                                                                                                                                                                                                                                         |
| N | Q3SWX8 | DE | Nucleosome-remodeling factor subunit RBAP46;                                                                                                                                                                                                                                                                                                                                                                                                                                                                                                                                                                                                                                           |
| N | Q3SWX8 | DE | Retinoblastoma-binding protein 7;                                                                                                                                                                                                                                                                                                                                                                                                                                                                                                                                                                                                                                                      |
| N | Q3SWX8 | DR | DNA replication                                                                                                                                                                                                                                                                                                                                                                                                                                                                                                                                                                                                                                                                        |
| N | Q3SWX8 | DR | cellular heat acclimation                                                                                                                                                                                                                                                                                                                                                                                                                                                                                                                                                                                                                                                              |
| N | Q3SWX8 | DR | chromatin modification                                                                                                                                                                                                                                                                                                                                                                                                                                                                                                                                                                                                                                                                 |
| N | Q3SWX8 | DR | negative regulation of cell growth                                                                                                                                                                                                                                                                                                                                                                                                                                                                                                                                                                                                                                                     |
| N | Q3T003 | DE | 60S ribosomal protein L18a;                                                                                                                                                                                                                                                                                                                                                                                                                                                                                                                                                                                                                                                            |
| N | Q3T003 | DR | structural constituent of ribosome                                                                                                                                                                                                                                                                                                                                                                                                                                                                                                                                                                                                                                                     |
| N | Q3T0X6 | DE | 40S ribosomal protein S16;                                                                                                                                                                                                                                                                                                                                                                                                                                                                                                                                                                                                                                                             |
| N | Q3T0X6 | DR | structural constituent of ribosome                                                                                                                                                                                                                                                                                                                                                                                                                                                                                                                                                                                                                                                     |
| N | Q3T0Z2 | CC | Ileal protein which stimulates gastric acid and pepsinogen secretion                                                                                                                                                                                                                                                                                                                                                                                                                                                                                                                                                                                                                   |
| N | Q3T0Z2 | CC | Seems to be able to bind to bile salts and bilirubins (By similarity).                                                                                                                                                                                                                                                                                                                                                                                                                                                                                                                                                                                                                 |
| N | Q3T0Z2 | DE | Fatty acid-binding protein 6;                                                                                                                                                                                                                                                                                                                                                                                                                                                                                                                                                                                                                                                          |
| N | Q3T0Z2 | DE | Gastrotropin;                                                                                                                                                                                                                                                                                                                                                                                                                                                                                                                                                                                                                                                                          |
| N | Q3T0Z2 | DE | Ileal lipid-binding protein;                                                                                                                                                                                                                                                                                                                                                                                                                                                                                                                                                                                                                                                           |
| N | Q3T0Z2 | DR | lipid binding                                                                                                                                                                                                                                                                                                                                                                                                                                                                                                                                                                                                                                                                          |
| N | Q3T0Z2 | DR | transporter activity                                                                                                                                                                                                                                                                                                                                                                                                                                                                                                                                                                                                                                                                   |
| N | Q3TFQ1 | DE | CLL deletion region gene 6 protein homolog;                                                                                                                                                                                                                                                                                                                                                                                                                                                                                                                                                                                                                                            |
| N | Q3TFQ1 | DE | Chronic lymphocytic leukemia deletion region gene 6 protein homolog;                                                                                                                                                                                                                                                                                                                                                                                                                                                                                                                                                                                                                   |
| N | Q3TPR7 | CC | Possible tumor suppressor which may play a role in cell growth (By similarity).                                                                                                                                                                                                                                                                                                                                                                                                                                                                                                                                                                                                        |
| N | Q3TPR7 | DE | Transmembrane protein 184C;                                                                                                                                                                                                                                                                                                                                                                                                                                                                                                                                                                                                                                                            |
| N | Q3TPR7 | DE | Transmembrane protein 34;                                                                                                                                                                                                                                                                                                                                                                                                                                                                                                                                                                                                                                                              |
| N | Q3U4B4 | CC | Plays a highly specific role in the last step of keratinocyte differentiation                                                                                                                                                                                                                                                                                                                                                                                                                                                                                                                                                                                                          |
| N | Q3U4B4 | CC | May have an essential function in lipid metabolism of the most differentiated epidermal layers (By similarity).                                                                                                                                                                                                                                                                                                                                                                                                                                                                                                                                                                        |
| N | Q3U4B4 | DE | Lipase member N;                                                                                                                                                                                                                                                                                                                                                                                                                                                                                                                                                                                                                                                                       |
| N | Q3U4B4 | DE | Lipase-like abhydrolase domain-containing protein 4;                                                                                                                                                                                                                                                                                                                                                                                                                                                                                                                                                                                                                                   |
| N | Q3U4B4 | DR | hydrolase activity                                                                                                                                                                                                                                                                                                                                                                                                                                                                                                                                                                                                                                                                     |
| N | Q3U4B4 | DR | lipid catabolic process                                                                                                                                                                                                                                                                                                                                                                                                                                                                                                                                                                                                                                                                |
| N | Q3U4G3 | DE | Uncharacterized protein C3orf21 homolog;                                                                                                                                                                                                                                                                                                                                                                                                                                                                                                                                                                                                                                               |
| N | Q3U4G3 | DR | transferase activity, transferring glycosyl groups                                                                                                                                                                                                                                                                                                                                                                                                                                                                                                                                                                                                                                     |
| N | Q3V2K1 | DE | Uncharacterized protein CXorf65 homolog;                                                                                                                                                                                                                                                                                                                                                                                                                                                                                                                                                                                                                                               |
| N | Q3V4S8 | DE | Uncharacterized protein ORF82;                                                                                                                                                                                                                                                                                                                                                                                                                                                                                                                                                                                                                                                         |
| N | Q3V7G2 | CC | Cell wall formation (By similarity).                                                                                                                                                                                                                                                                                                                                                                                                                                                                                                                                                                                                                                                   |
| N | Q3V7G2 | DE | Monofunctional TGase;                                                                                                                                                                                                                                                                                                                                                                                                                                                                                                                                                                                                                                                                  |
| N | Q3V7G2 | DE | Monofunctional biosynthetic peptidoglycan transglycosylase;                                                                                                                                                                                                                                                                                                                                                                                                                                                                                                                                                                                                                            |
| N | Q3V7G2 | DR | cellular cell wall organization                                                                                                                                                                                                                                                                                                                                                                                                                                                                                                                                                                                                                                                        |
| N | Q3V7G2 | DR | peptidoglycan biosynthetic process                                                                                                                                                                                                                                                                                                                                                                                                                                                                                                                                                                                                                                                     |
| N | Q3V7G2 | DR | regulation of cell shape                                                                                                                                                                                                                                                                                                                                                                                                                                                                                                                                                                                                                                                               |
| N | Q3V7G2 | DR | transferase activity, transferring pentosyl groups                                                                                                                                                                                                                                                                                                                                                                                                                                                                                                                                                                                                                                     |
| N | Q3YQX7 | CC | Digests double-stranded RNA                                                                                                                                                                                                                                                                                                                                                                                                                                                                                                                                                                                                                                                            |
| N | Q3YQX7 | CC | Involved in the processing of ribosomal RNA precursors and of some mRNAs (By similarity).                                                                                                                                                                                                                                                                                                                                                                                                                                                                                                                                                                                              |
| N | Q3YQX7 | DE | Ribonuclease 3;                                                                                                                                                                                                                                                                                                                                                                                                                                                                                                                                                                                                                                                                        |
| N | Q3YQX7 | DE | Ribonuclease III;                                                                                                                                                                                                                                                                                                                                                                                                                                                                                                                                                                                                                                                                      |
| N | Q3YQX7 | DR | RNA processing                                                                                                                                                                                                                                                                                                                                                                                                                                                                                                                                                                                                                                                                         |
| N | Q3YQX7 | DR | double-stranded RNA binding                                                                                                                                                                                                                                                                                                                                                                                                                                                                                                                                                                                                                                                            |
| N | Q3YQX7 | DR | rRNA catabolic process                                                                                                                                                                                                                                                                                                                                                                                                                                                                                                                                                                                                                                                                 |
| N | Q3YQX7 | DR | ribonuclease III activity                                                                                                                                                                                                                                                                                                                                                                                                                                                                                                                                                                                                                                                              |
| N | Q3YU12 | CC | Catalyzes a reversible aldol reaction between acetaldehyde and D-glyceraldehyde 3-phosphate to generate 2-deoxy- D-ribose 5-phosphate (By similarity)                                                                                                                                                                                                                                                                                                                                                                                                                                                                                                                                  |
| N | Q3YU12 | DE | 2-deoxy-D-ribose 5-phosphate aldolase;                                                                                                                                                                                                                                                                                                                                                                                                                                                                                                                                                                                                                                                 |

|   |        |    |                                                                                                                                                                                                                                         |
|---|--------|----|-----------------------------------------------------------------------------------------------------------------------------------------------------------------------------------------------------------------------------------------|
| N | Q3YU12 | DE | Deoxyriboaldolase;                                                                                                                                                                                                                      |
| N | Q3YU12 | DE | Deoxyribose-phosphate aldolase;                                                                                                                                                                                                         |
| N | Q3YU12 | DE | Phosphodeoxyriboaldolase;                                                                                                                                                                                                               |
| N | Q3YU12 | DR | deoxyribonucleotide catabolic process                                                                                                                                                                                                   |
| N | Q3YU12 | DR | deoxyribose-phosphate aldolase activity                                                                                                                                                                                                 |
| N | Q3YUE4 | CC | Binds to the 23S rRNA (By similarity).                                                                                                                                                                                                  |
| N | Q3YUE4 | DE | 50S ribosomal protein L9;                                                                                                                                                                                                               |
| N | Q3YUE4 | DR | structural constituent of ribosome                                                                                                                                                                                                      |
| N | Q3YV72 | DE | Rhamnulokinase;                                                                                                                                                                                                                         |
| N | Q3YV72 | DE | Rhamnulose kinase;                                                                                                                                                                                                                      |
| N | Q3YV72 | DR | rhamnose catabolic process                                                                                                                                                                                                              |
| N | Q3YV72 | DR | rhamnulokinase activity                                                                                                                                                                                                                 |
| N | Q3YWA3 | CC | Catalyzes, although with low efficiency, the sulfur transfer reaction from thiosulfate to cyanide (By similarity).                                                                                                                      |
| N | Q3YWA3 | DE | Thiosulfate sulfurtransferase glpE;                                                                                                                                                                                                     |
| N | Q3YWA3 | DR | glycerol metabolic process                                                                                                                                                                                                              |
| N | Q3YWA3 | DR | thiosulfate sulfurtransferase activity                                                                                                                                                                                                  |
| N | Q3Z0G5 | CC | Catalyzes the sequential NAD-dependent oxidations of L- histidinol to L- histidinaldehyde and then to L-histidine (By similarity).                                                                                                      |
| N | Q3Z0G5 | DE | Histidinol dehydrogenase;                                                                                                                                                                                                               |
| N | Q3Z0G5 | DR | histidine biosynthetic process                                                                                                                                                                                                          |
| N | Q3Z0G5 | DR | histidinol dehydrogenase activity                                                                                                                                                                                                       |
| N | Q3Z0G5 | DR | oxidation-reduction process                                                                                                                                                                                                             |
| N | Q3Z0G5 | DR | zinc ion binding                                                                                                                                                                                                                        |
| N | Q3Z146 | CC | Involved in the breakdown of putrescine via hydrolysis of the gamma-glutamyl linkage of gamma-glutamyl-gamma- aminobutyrate (By similarity).                                                                                            |
| N | Q3Z146 | DE | Gamma-Glu-GABA hydrolase;                                                                                                                                                                                                               |
| N | Q3Z146 | DE | Gamma-glutamyl-gamma-aminobutyrate hydrolase;                                                                                                                                                                                           |
| N | Q3Z146 | DR | gamma-glutamyl-gamma-aminobutyrate hydrolase activity                                                                                                                                                                                   |
| N | Q3Z146 | DR | glutamine metabolic process                                                                                                                                                                                                             |
| N | Q3Z3L1 | DE | CMP kinase;                                                                                                                                                                                                                             |
| N | Q3Z3L1 | DE | Cytidine monophosphate kinase;                                                                                                                                                                                                          |
| N | Q3Z3L1 | DE | Cytidylate kinase;                                                                                                                                                                                                                      |
| N | Q3Z3L1 | DR | cytidylate kinase activity                                                                                                                                                                                                              |
| N | Q3Z4T0 | CC | Catalyzes a salvage reaction resulting in the formation of AMP, that is energetically less costly than de novo synthesis (By similarity).                                                                                               |
| N | Q3Z4T0 | DE | Adenine phosphoribosyltransferase;                                                                                                                                                                                                      |
| N | Q3Z4T0 | DR | adenine phosphoribosyltransferase activity                                                                                                                                                                                              |
| N | Q3Z4T0 | DR | adenine salvage                                                                                                                                                                                                                         |
| N | Q3Z4T0 | DR | purine ribonucleoside salvage                                                                                                                                                                                                           |
| N | Q3Z5H3 | CC | Component of the acetyl coenzyme A carboxylase (ACC) complex                                                                                                                                                                            |
| N | Q3Z5H3 | CC | First, biotin carboxylase catalyzes the carboxylation of biotin on its carrier protein (BCCP) and then the CO(2) group is transferred by the carboxyltransferase to acetyl-CoA to form malonyl-CoA (By similarity).                     |
| N | Q3Z5H3 | DE | ACCase subunit alpha;                                                                                                                                                                                                                   |
| N | Q3Z5H3 | DE | Acetyl-CoA carboxylase carboxyltransferase subunit alpha;                                                                                                                                                                               |
| N | Q3Z5H3 | DE | Acetyl-coenzyme A carboxylase carboxyl transferase subunit alpha;                                                                                                                                                                       |
| N | Q3Z5H3 | DR | acetyl-CoA carboxylase activity                                                                                                                                                                                                         |
| N | Q3Z5H3 | DR | fatty acid biosynthetic process                                                                                                                                                                                                         |
| N | Q3Z7Z8 | CC | NDH-1 shuttles electrons from NADH, via FMN and iron- sulfur (Fe-S) centers, to quinones in the respiratory chain                                                                                                                       |
| N | Q3Z7Z8 | CC | Couples the redox reaction to proton translocation (for every two electrons transferred, four hydrogen ions are translocated across the cytoplasmic membrane), and thus conserves the redox energy in a proton gradient (By similarity) |
| N | Q3Z7Z8 | CC | The immediate electron acceptor for the enzyme in this species is believed to be ubiquinone                                                                                                                                             |
| N | Q3Z7Z8 | DE | NADH dehydrogenase I subunit D;                                                                                                                                                                                                         |
| N | Q3Z7Z8 | DE | NADH-quinone oxidoreductase subunit D;                                                                                                                                                                                                  |
| N | Q3Z7Z8 | DE | NDH-1 subunit D;                                                                                                                                                                                                                        |
| N | Q3Z7Z8 | DR | NADH dehydrogenase (quinone) activity                                                                                                                                                                                                   |
| N | Q3Z7Z8 | DR | oxidation-reduction process                                                                                                                                                                                                             |
| N | Q3Z7Z8 | DR | quinone binding                                                                                                                                                                                                                         |
| N | Q3Z8X7 | CC | Involved in DNA repair and recF pathway recombination (By similarity).                                                                                                                                                                  |
| N | Q3Z8X7 | DE | DNA repair protein recO;                                                                                                                                                                                                                |
| N | Q3Z8X7 | DE | Recombination protein O;                                                                                                                                                                                                                |



|   |        |    |                                                                                                                                                                        |
|---|--------|----|------------------------------------------------------------------------------------------------------------------------------------------------------------------------|
| N | Q3Z8X7 | DR | ARF GTPase activator activity                                                                                                                                          |
| N | Q3Z8X7 | DR | DNA recombination                                                                                                                                                      |
| N | Q3Z8X7 | DR | regulation of ARF GTPase activity                                                                                                                                      |
| N | Q3Z8X7 | DR | zinc ion binding<br>is required not only for elongation of protein synthesis but also for the initiation                                                               |
| N | Q3Z9G6 | CC | of all mRNA translation through initiator tRNA(fMet) aminoacylation (By similarity)                                                                                    |
| N | Q3Z9G6 | DE | Methionine--tRNA ligase;                                                                                                                                               |
| N | Q3Z9G6 | DE | Methionyl-tRNA synthetase;                                                                                                                                             |
| N | Q3Z9G6 | DR | metal ion binding                                                                                                                                                      |
| N | Q3Z9G6 | DR | methionine-tRNA ligase activity                                                                                                                                        |
| N | Q3Z9G6 | DR | methionyl-tRNA aminoacylation<br>This protein is located at the 50S-50S ribosomal subunit interface and may play                                                       |
| N | Q3Z9L4 | CC | a role in the structure and function of the aminoacyl-tRNA binding site (By similarity)                                                                                |
| N | Q3Z9L4 | DE | 50S ribosomal protein L19;                                                                                                                                             |
| N | Q3Z9L4 | DR | structural constituent of ribosome                                                                                                                                     |
| N | Q3ZBK5 | CC | Acts as a negative regulator of innate and adaptive immunity by maintaining immune homeostasis                                                                         |
| N | Q3ZBK5 | CC | Inhibits JUN/AP1 and NF-kappa-B activation                                                                                                                             |
| N | Q3ZBK5 | CC | Negative regulator of Toll-like receptor and T-cell receptor function                                                                                                  |
| N | Q3ZBK5 | CC | prevents hyperresponsiveness of the immune system and maintains immune homeostasis                                                                                     |
| N | Q3ZBK5 | CC | Promotes Fas-induced apoptosis (By similarity).                                                                                                                        |
| N | Q3ZBK5 | DE | TNF alpha-induced protein 8-like protein 2;                                                                                                                            |
| N | Q3ZBK5 | DE | TNFAIP8-like protein 2;                                                                                                                                                |
| N | Q3ZBK5 | DE | Tumor necrosis factor alpha-induced protein 8-like protein 2;                                                                                                          |
| N | Q3ZBK5 | DR | innate immune response                                                                                                                                                 |
| N | Q3ZCB6 | CC | Probable regulator of exocrine pancreas development (By similarity).                                                                                                   |
| N | Q3ZCB6 | DE | Exocrine differentiation and proliferation factor;                                                                                                                     |
| N | Q3ZCB6 | DE | Pancreatic progenitor cell differentiation and proliferation factor;                                                                                                   |
| N | Q3ZCB6 | DR | cell differentiation                                                                                                                                                   |
| N | Q3ZCB6 | DR | multicellular organismal development                                                                                                                                   |
| N | Q3ZCT8 | DE | Kelch domain-containing protein 6;                                                                                                                                     |
| N | Q3ZCT8 | DE | Kelch repeat and BTB domain-containing protein 12;                                                                                                                     |
| N | Q3ZJ19 | CC | This protein is a component of the reaction center of photosystem II.                                                                                                  |
| N | Q3ZJ19 | DE | Photosystem II reaction center protein J;                                                                                                                              |
| N | Q3ZJ19 | DR | photosynthesis                                                                                                                                                         |
| N | Q3ZXEO | CC | specifically methylates the N7 position of a guanosine in 16S rRNA (By similarity)                                                                                     |
| N | Q3ZXEO | DE | 16S rRNA 7-methylguanosine methyltransferase;                                                                                                                          |
| N | Q3ZXEO | DE | 16S rRNA m7G methyltransferase;                                                                                                                                        |
| N | Q3ZXEO | DE | Ribosomal RNA small subunit methyltransferase G;                                                                                                                       |
| N | Q3ZXEO | DR | rRNA methyltransferase activity                                                                                                                                        |
| N | Q3ZXU3 | CC | One of the essential components for the initiation of protein synthesis                                                                                                |
| N | Q3ZXU3 | CC | Also involved in the hydrolysis of GTP during the formation of the 70S ribosomal complex (By similarity).                                                              |
| N | Q3ZXU3 | CC | Protects formylmethionyl-tRNA from spontaneous hydrolysis and promotes its binding to the 30S ribosomal subunits                                                       |
| N | Q3ZXU3 | DE | Translation initiation factor IF-2;                                                                                                                                    |
| N | Q3ZXU3 | DR | GTPase activity                                                                                                                                                        |
| N | Q3ZXU3 | DR | translation initiation factor activity                                                                                                                                 |
| N | Q40392 | CC | Disease resistance protein                                                                                                                                             |
| N | Q40392 | CC | Resistance proteins guard the plant against pathogens that contain an appropriate avirulence protein via a direct or indirect interaction with this avirulence protein |
| N | Q40392 | CC | That triggers a defense system including the hypersensitive response, which restricts the pathogen growth.                                                             |
| N | Q40392 | DE | TMV resistance protein N;                                                                                                                                              |
| N | Q40392 | DR | plant-type hypersensitive response                                                                                                                                     |
| N | Q40392 | DR | transmembrane receptor activity                                                                                                                                        |
| N | Q42328 | DE | Defensin-like protein 195;                                                                                                                                             |
| N | Q42328 | DE | Trypsin inhibitor ATTI-1;                                                                                                                                              |
| N | Q42328 | DR | defense response to fungus                                                                                                                                             |
| N | Q42328 | DR | ion channel inhibitor activity                                                                                                                                         |
| N | Q42328 | DR | killing of cells of other organism                                                                                                                                     |
| N | Q42569 | DE | Cytochrome P450 90A1;                                                                                                                                                  |
| N | Q42569 | DR | brassinosteroid biosynthetic process                                                                                                                                   |
| N | Q42569 | DR | brassinosteroid homeostasis                                                                                                                                            |
| N | Q42569 | DR | electron carrier activity                                                                                                                                              |

|   |        |    |                                                                                                                                                                                                           |
|---|--------|----|-----------------------------------------------------------------------------------------------------------------------------------------------------------------------------------------------------------|
| N | Q42569 | DR | monooxygenase activity                                                                                                                                                                                    |
| N | Q42569 | DR | oxidation-reduction process                                                                                                                                                                               |
| N | Q42569 | DR | pollen exine formation                                                                                                                                                                                    |
| N | Q42569 | DR | positive regulation of flower development                                                                                                                                                                 |
| N | Q42569 | DR | response to UV-B                                                                                                                                                                                          |
| N | Q42569 | DR | tapetal cell differentiation                                                                                                                                                                              |
| N | Q42602 | DE | Cytochrome P450 89A2;                                                                                                                                                                                     |
| N | Q42602 | DR | electron carrier activity                                                                                                                                                                                 |
| N | Q42602 | DR | monooxygenase activity                                                                                                                                                                                    |
| N | Q42602 | DR | oxidation-reduction process                                                                                                                                                                               |
| N | Q42870 | CC | Converts lysophosphatidic acid (LPA) into phosphatidic acid by incorporating acyl moiety at the 2 position                                                                                                |
| N | Q42870 | CC | This enzyme uses erucoyl-CoA as an acyl donor.                                                                                                                                                            |
| N | Q42870 | DE | 1-AGP acyltransferase;                                                                                                                                                                                    |
| N | Q42870 | DE | 1-acyl-sn-glycerol-3-phosphate acyltransferase;                                                                                                                                                           |
| N | Q42870 | DE | Lysophosphatidic acid acyltransferase;                                                                                                                                                                    |
| N | Q42870 | DR | 1-acylglycerol-3-phosphate O-acyltransferase activity                                                                                                                                                     |
| N | Q42870 | DR | phospholipid biosynthetic process                                                                                                                                                                         |
| N | Q42908 | CC | Catalyzes the interconversion of 2-phosphoglycerate and 3-phosphoglycerate (By similarity).                                                                                                               |
| N | Q42908 | DE | 2,3-bisphosphoglycerate-independent phosphoglycerate mutase;                                                                                                                                              |
| N | Q42908 | DE | BPG-independent PGAM;                                                                                                                                                                                     |
| N | Q42908 | DE | Phosphoglyceromutase;                                                                                                                                                                                     |
| N | Q42908 | DR | manganese ion binding                                                                                                                                                                                     |
| N | Q42908 | DR | phosphoglycerate mutase activity                                                                                                                                                                          |
| N | Q42908 | DR | response to stress                                                                                                                                                                                        |
| N | Q43495 | DE | Protein 108;                                                                                                                                                                                              |
| N | Q43922 | CC | Converts dehydroshikimate to protocatechuate.                                                                                                                                                             |
| N | Q43922 | DE | 3-DHS dehydratase;                                                                                                                                                                                        |
| N | Q43922 | DE | 3-dehydroshikimate dehydratase;                                                                                                                                                                           |
| N | Q43922 | DR | lyase activity                                                                                                                                                                                            |
| N | Q43922 | DR | quinate metabolic process                                                                                                                                                                                 |
| N | Q44297 | CC | In the forward direction acts also on secondary amine dicarboxylates such as N-(1-carboxyethyl)methionine and N-(1-carboxyethyl)phenylalanine                                                             |
| N | Q44297 | CC | in the reverse direction, the enzyme also acts on neutral amino acids as an amino donor                                                                                                                   |
| N | Q44297 | CC | They include L-amino acids such as 2-aminopentanoic acid, 2-aminobutyric acid, 2-aminohexanoic acid, 3-chloroalanine, O-acetylserine, methionine, isoleucine, valine, phenylalanine, leucine and alanine. |
| N | Q44297 | DE | N-(1-D-carboxyethyl)-L-norvaline dehydrogenase;                                                                                                                                                           |
| N | Q44297 | DE | Opine dehydrogenase;                                                                                                                                                                                      |
| N | Q44297 | DR | glycerol-3-phosphate catabolic process                                                                                                                                                                    |
| N | Q44297 | DR | opine dehydrogenase activity                                                                                                                                                                              |
| N | Q44297 | DR | oxidation-reduction process                                                                                                                                                                               |
| N | Q44297 | DR | oxidoreductase activity, acting on the CH-OH group of donors, NAD or NADP as acceptor                                                                                                                     |
| N | Q44586 | CC | Component of the NCC cation-efflux system that confers resistance to nickel, cobalt and cadmium                                                                                                           |
| N | Q44586 | CC | May form a membrane tunnel, which allows ion transport across the membrane.                                                                                                                               |
| N | Q44586 | DE | Nickel-cobalt-cadmium resistance protein NccA;                                                                                                                                                            |
| N | Q44586 | DR | cation transmembrane transporter activity                                                                                                                                                                 |
| N | Q44586 | DR | response to cadmium ion                                                                                                                                                                                   |
| N | Q45618 | CC | Involved in the transposition of the insertion sequence (By similarity).                                                                                                                                  |
| N | Q45618 | DE | Putative transposase for insertion sequence element IS5376;                                                                                                                                               |
| N | Q45618 | DR | DNA integration                                                                                                                                                                                           |
| N | Q45618 | DR | DNA recombination                                                                                                                                                                                         |
| N | Q45618 | DR | recombinase activity                                                                                                                                                                                      |
| N | Q45618 | DR | transposition                                                                                                                                                                                             |
| N | Q45747 | CC | Promotes colloidosmotic lysis by binding to the midgut epithelial cells of insects.                                                                                                                       |
| N | Q45747 | DE | 131 kDa crystal protein;                                                                                                                                                                                  |
| N | Q45747 | DE | Crystalline entomocidal protoxin;                                                                                                                                                                         |
| N | Q45747 | DE | Insecticidal delta-endotoxin CryID(b);                                                                                                                                                                    |
| N | Q45747 | DE | Pesticidal crystal protein cryIDb;                                                                                                                                                                        |
| N | Q45747 | DR | defense response                                                                                                                                                                                          |
| N | Q45747 | DR | receptor binding                                                                                                                                                                                          |
| N | Q45747 | DR | sporulation resulting in formation of a cellular spore                                                                                                                                                    |

|   |        |    |                                                                                                                                                                                               |
|---|--------|----|-----------------------------------------------------------------------------------------------------------------------------------------------------------------------------------------------|
| N | Q45983 | CC | Required for biosynthesis of LAH modification in the post-translational modification of Campylobacter coli flagellin.                                                                         |
| N | Q45983 | DE | Post-translational flagellin modification protein A;                                                                                                                                          |
| N | Q45983 | DR | oxidation-reduction process                                                                                                                                                                   |
| N | Q45983 | DR | oxidoreductase activity                                                                                                                                                                       |
| N | Q45UF8 | CC | Spike-forming protein that mediates virion attachment to the host epithelial cell receptors and plays a major role in cell penetration, determination of host range restriction and virulence |
| N | Q45UF8 | CC | VP8* forms the head of the spikes (By similarity).                                                                                                                                            |
| N | Q45UF8 | CC | Kotavirus entry into the host cell probably involves multiple sequential contacts between the outer capsid proteins VP4 and VP7, and the cell receptors (By similarity)                       |
| N | Q45UF8 | DE | Hemagglutinin;                                                                                                                                                                                |
| N | Q45UF8 | DE | Outer capsid protein VP4;                                                                                                                                                                     |
| N | Q45UF8 | DE | Outer capsid protein VP5*;                                                                                                                                                                    |
| N | Q45UF8 | DE | Outer capsid protein VP8*;                                                                                                                                                                    |
| N | Q45UF8 | DR | interspecies interaction between organisms                                                                                                                                                    |
| N | Q45UF8 | DR | viral infectious cycle                                                                                                                                                                        |
| N | Q46036 | CC | Involved in the storage or transport of lipids necessary for membrane maintenance under stressful conditions                                                                                  |
| N | Q46036 | CC | Displays a binding preference for lysophospholipids (By similarity).                                                                                                                          |
| N | Q46036 | DE | Outer membrane lipoprotein blc;                                                                                                                                                               |
| N | Q46036 | DR | lipid binding                                                                                                                                                                                 |
| N | Q46036 | DR | transporter activity                                                                                                                                                                          |
| N | Q46403 | DE | Late transcription unit A protein;                                                                                                                                                            |
| N | Q464Z5 | CC | Involved in the binding of tRNA to the ribosomes (By similarity).                                                                                                                             |
| N | Q464Z5 | DE | 30S ribosomal protein S10P;                                                                                                                                                                   |
| N | Q464Z5 | DR | structural constituent of ribosome                                                                                                                                                            |
| N | Q465V4 | DE | 30S ribosomal protein S8e;                                                                                                                                                                    |
| N | Q465V4 | DR | structural constituent of ribosome                                                                                                                                                            |
| N | Q465Y5 | CC | Participates actively in the response to hyperosmotic and heat shock by preventing the aggregation of stress-denatured proteins, in association with dnaK and grpE                            |
| N | Q465Y5 | CC | GrpE releases ADP from dnaK; ATP binding to dnaK triggers the release of the substrate protein, thus completing the reaction cycle                                                            |
| N | Q465Y5 | CC | It is the nucleotide exchange factor for dnaK and may function as a thermosensor                                                                                                              |
| N | Q465Y5 | CC | Several rounds of ATP- dependent interactions between dnaJ, dnaK and grpE are required for fully efficient folding (By similarity).                                                           |
| N | Q465Y5 | CC | Unfolded proteins bind initially to dnaJ; upon interaction with the dnaJ-bound protein, dnaK hydrolyzes its bound ATP, resulting in the formation of a stable complex                         |
| N | Q465Y5 | DE | HSP-70 cofactor;                                                                                                                                                                              |
| N | Q465Y5 | DE | Protein grpE;                                                                                                                                                                                 |
| N | Q465Y5 | DR | adenyl-nucleotide exchange factor activity                                                                                                                                                    |
| N | Q465Y5 | DR | chaperone binding                                                                                                                                                                             |
| N | Q465Y5 | DR | protein folding                                                                                                                                                                               |
| N | Q465Y5 | DR | protein homodimerization activity                                                                                                                                                             |
| N | Q465Y5 | DR | response to stress                                                                                                                                                                            |
| N | Q46E46 | DE | Histidinol-phosphate aminotransferase;                                                                                                                                                        |
| N | Q46E46 | DE | Imidazole acetol-phosphate transaminase;                                                                                                                                                      |
| N | Q46E46 | DR | histidine biosynthetic process                                                                                                                                                                |
| N | Q46E46 | DR | histidinol-phosphate transaminase activity                                                                                                                                                    |
| N | Q46E46 | DR | pyridoxal phosphate binding                                                                                                                                                                   |
| N | Q46FV4 | CC | Catalyzes the reversible reduction of methylene-H(4)MPT to methyl-H(4)MPT (By similarity).                                                                                                    |
| N | Q46FV4 | DE | 5,10-methylenetetrahydromethanopterin reductase;                                                                                                                                              |
| N | Q46FV4 | DE | Coenzyme F420-dependent N(5),N(10)-methyleneetrahydromethanopterin reductase;                                                                                                                 |
| N | Q46FV4 | DE | Methylene-H(4)MPT reductase;                                                                                                                                                                  |
| N | Q46FV4 | DR | coenzyme F420-dependent N(5),N(10)-methyleneetrahydromethanopterin reductase activity                                                                                                         |
| N | Q46FV4 | DR | methanogenesis                                                                                                                                                                                |
| N | Q46FV4 | DR | one-carbon metabolic process                                                                                                                                                                  |
| N | Q46GB9 | CC | Catalyzes the reversible transfer of the terminal phosphate group between ATP and AMP                                                                                                         |
| N | Q46GB9 | CC | This small ubiquitous enzyme involved in the energy metabolism and nucleotide synthesis, is essential for maintenance and cell growth (By similarity).                                        |
| N | Q46GB9 | DE | ATP-AMP transphosphorylase;                                                                                                                                                                   |
| N | Q46GB9 | DE | Adenylate kinase;                                                                                                                                                                             |
| N | Q46GB9 | DR | adenylate kinase activity                                                                                                                                                                     |

|   |        |    |                                                                                                                                                                                                                                               |
|---|--------|----|-----------------------------------------------------------------------------------------------------------------------------------------------------------------------------------------------------------------------------------------------|
| N | Q46GB9 | DR | nucleotide biosynthetic process                                                                                                                                                                                                               |
| N | Q46L08 | CC | The UvrABC repair system catalyzes the recognition and processing of DNA lesions.                                                                                                                                                             |
| N | Q46L08 | CC | The N-terminal half is responsible for the 3' incision and the C-terminal half is responsible for the 5' incision (By similarity).                                                                                                            |
| N | Q46L08 | CC | UvrC both incises the 5' and 3' sides of the lesion                                                                                                                                                                                           |
| N | Q46L08 | DE | Excinuclease ABC subunit C;                                                                                                                                                                                                                   |
| N | Q46L08 | DE | Protein uvrC;                                                                                                                                                                                                                                 |
| N | Q46L08 | DE | UvrABC system protein C;                                                                                                                                                                                                                      |
| N | Q46L08 | DR | excinuclease ABC activity                                                                                                                                                                                                                     |
| N | Q46L08 | DR | nucleotide-excision repair                                                                                                                                                                                                                    |
| N | Q46L27 | CC | Part of the ABC transporter complex PstSACB involved in phosphate import                                                                                                                                                                      |
| N | Q46L27 | CC | Responsible for energy coupling to the transport system (By similarity).                                                                                                                                                                      |
| N | Q46L27 | DE | ABC phosphate transporter;                                                                                                                                                                                                                    |
| N | Q46L27 | DE | Phosphate import ATP-binding protein PstB;                                                                                                                                                                                                    |
| N | Q46L27 | DE | Phosphate-transporting ATPase;                                                                                                                                                                                                                |
| N | Q46L27 | DR | inorganic phosphate transmembrane transporter activity                                                                                                                                                                                        |
| N | Q46L27 | DR | phosphate transmembrane-transporting ATPase activity                                                                                                                                                                                          |
| N | Q470E8 | CC | Involved in saturated fatty acids biosynthesis.                                                                                                                                                                                               |
| N | Q470E8 | DE | (3R)-hydroxymyristoyl ACP dehydratase;                                                                                                                                                                                                        |
| N | Q470E8 | DE | (3R)-hydroxymyristoyl-[acyl-carrier-protein] dehydratase;                                                                                                                                                                                     |
| N | Q470E8 | DR | fatty acid biosynthetic process                                                                                                                                                                                                               |
| N | Q470E8 | DR | hydro-lyase activity                                                                                                                                                                                                                          |
| N | Q470E8 | DR | lipid A biosynthetic process                                                                                                                                                                                                                  |
| N | Q47CN0 | CC | This protein is one of the two subunits of integration host factor, a specific DNA-binding protein that functions in genetic recombination as well as in transcriptional and translational control (By similarity).                           |
| N | Q47CN0 | DE | IHF-alpha 2;                                                                                                                                                                                                                                  |
| N | Q47CN0 | DE | Integration host factor subunit alpha 2;                                                                                                                                                                                                      |
| N | Q47CN0 | DR | DNA recombination                                                                                                                                                                                                                             |
| N | Q47CN0 | DR | regulation of transcription, DNA-dependent                                                                                                                                                                                                    |
| N | Q47CN0 | DR | regulation of translation                                                                                                                                                                                                                     |
| N | Q47GC1 | CC | Catalyzes the cleavage of the C5-C6 bond of 2-hydroxy-6-oxononadienedioate and 2-hydroxy-6-oxononatrienedioate, a dienol ring fission product of the bacterial meta-cleavage pathway for degradation of phenylpropionic acid (By similarity). |
| N | Q47GC1 | DE | 2-hydroxy-6-ketono-2,4-diene-1,9-dioic acid 5,6-hydrolase 2;                                                                                                                                                                                  |
| N | Q47GC1 | DE | 2-hydroxy-6-oxonon-2,4,7-triene-1,9-dioic acid 5,6-hydrolase 2;                                                                                                                                                                               |
| N | Q47GC1 | DE | 2-hydroxy-6-oxonon-2,4-diene-1,9-dioic acid 5,6-hydrolase 2;                                                                                                                                                                                  |
| N | Q47GC1 | DE | 2-hydroxy-6-oxononadienedioate/2-hydroxy-6-oxononatrienedioate hydrolase 2;                                                                                                                                                                   |
| N | Q47GC1 | DR | aromatic compound catabolic process                                                                                                                                                                                                           |
| N | Q47GC1 | DR | hydrolase activity, acting on acid carbon-carbon bonds, in ketonic substances                                                                                                                                                                 |
| N | Q47K71 | CC | Plays an important role in the initiation and regulation of chromosomal replication.                                                                                                                                                          |
| N | Q47K71 | CC | Binds to the origin of replication; it binds specifically double-stranded DNA at a 9 bp consensus (dnaA box): 5'-TTATC[CA]A[CA]A-3'                                                                                                           |
| N | Q47K71 | CC | DnaA binds to ATP and to acidic phospholipids (By similarity).                                                                                                                                                                                |
| N | Q47K71 | DE | Chromosomal replication initiator protein DnaA;                                                                                                                                                                                               |
| N | Q47K71 | DR | DNA replication origin binding                                                                                                                                                                                                                |
| N | Q47K71 | DR | DNA-dependent DNA replication initiation                                                                                                                                                                                                      |
| N | Q47K71 | DR | nucleoside-triphosphatase activity                                                                                                                                                                                                            |
| N | Q47K71 | DR | regulation of DNA replication                                                                                                                                                                                                                 |
| N | Q47KV5 | CC | Catalyzes the condensation of pantoate with beta-alanine in an ATP-dependent reaction via a pantoal-adenylate intermediate (By similarity).                                                                                                   |
| N | Q47KV5 | DE | Pantoate--beta-alanine ligase;                                                                                                                                                                                                                |
| N | Q47KV5 | DE | Pantoate-activating enzyme;                                                                                                                                                                                                                   |
| N | Q47KV5 | DE | Pantothenate synthetase;                                                                                                                                                                                                                      |
| N | Q47KV5 | DR | pantoate-beta-alanine ligase activity                                                                                                                                                                                                         |
| N | Q47KV5 | DR | pantothenate biosynthetic process                                                                                                                                                                                                             |
| N | Q47N84 | DE | Argininosuccinate synthase;                                                                                                                                                                                                                   |
| N | Q47N84 | DE | Citrulline--aspartate ligase;                                                                                                                                                                                                                 |
| N | Q47N84 | DR | arginine biosynthetic process                                                                                                                                                                                                                 |
| N | Q47N84 | DR | argininosuccinate synthase activity                                                                                                                                                                                                           |
| N | Q47VS4 | CC | Catalyzes the phosphorylation of the 3'-hydroxyl group of dephosphocoenzyme A to form coenzyme A (By similarity).                                                                                                                             |
| N | Q47VS4 | DE | Dephospho-CoA kinase;                                                                                                                                                                                                                         |
| N | Q47VS4 | DE | Dephosphocoenzyme A kinase;                                                                                                                                                                                                                   |
| N | Q47VS4 | DR | coenzyme A biosynthetic process                                                                                                                                                                                                               |

|   |        |    |                                                                                                                                                                                                                                       |
|---|--------|----|---------------------------------------------------------------------------------------------------------------------------------------------------------------------------------------------------------------------------------------|
| N | Q47VS4 | DR | dephospho-CoA kinase activity                                                                                                                                                                                                         |
| N | Q47W35 | CC | Required for the formation of a threonylcarbamoyl group on adenosine at position 37 (t(6)A37) in tRNAs that read codons beginning with adenine (By similarity)                                                                        |
| N | Q47W35 | DE | Probable tRNA threonylcarbamoyladenine biosynthesis protein Gcp;                                                                                                                                                                      |
| N | Q47W35 | DE | t(6)A37 threonylcarbamoyladenine biosynthesis protein;                                                                                                                                                                                |
| N | Q47W35 | DR | metal ion binding                                                                                                                                                                                                                     |
| N | Q47W35 | DR | metalloendopeptidase activity                                                                                                                                                                                                         |
| N | Q47WD4 | DE | UPF0061 protein CPS_4238;                                                                                                                                                                                                             |
| N | Q48456 | CC | May function as a transporter.                                                                                                                                                                                                        |
| N | Q48456 | DE | Uncharacterized 49.5 kDa protein in cps region;                                                                                                                                                                                       |
| N | Q488Z2 | DE | 50S ribosomal protein L36;                                                                                                                                                                                                            |
| N | Q488Z2 | DR | structural constituent of ribosome                                                                                                                                                                                                    |
| N | Q48AB7 | CC | Converts heme B (prothemin IX) to heme O by substitution of the vinyl group on carbon 2 of heme B porphyrin ring with a hydroxyethyl farnesyl side group (By similarity)                                                              |
| N | Q48AB7 | DE | Heme B farnesyltransferase;                                                                                                                                                                                                           |
| N | Q48AB7 | DE | Heme O synthase;                                                                                                                                                                                                                      |
| N | Q48AB7 | DE | Protoheme IX farnesyltransferase;                                                                                                                                                                                                     |
| N | Q48AB7 | DR | heme O biosynthetic process                                                                                                                                                                                                           |
| N | Q48AB7 | DR | protoheme IX farnesyltransferase activity                                                                                                                                                                                             |
| N | Q48HL2 | CC | Part of the ABC transporter complex PhnCDE involved in phosphonates import                                                                                                                                                            |
| N | Q48HL2 | CC | Responsible for energy coupling to the transport system (By similarity).                                                                                                                                                              |
| N | Q48HL2 | DE | Phosphonates import ATP-binding protein PhnC 2;                                                                                                                                                                                       |
| N | Q48HL2 | DR | phosphonate transmembrane-transporting ATPase activity                                                                                                                                                                                |
| N | Q48KP5 | CC | Catalyzes the decarboxylation of orotidine 5'- monophosphate (OMP) to uridine 5'-monophosphate (UMP) (By similarity).                                                                                                                 |
| N | Q48KP5 | DE | OMP decarboxylase;                                                                                                                                                                                                                    |
| N | Q48KP5 | DE | Orotidine 5'-phosphate decarboxylase;                                                                                                                                                                                                 |
| N | Q48KP5 | DR | 'de novo' UMP biosynthetic process                                                                                                                                                                                                    |
| N | Q48KP5 | DR | 'de novo' pyrimidine base biosynthetic process                                                                                                                                                                                        |
| N | Q48KP5 | DR | orotidine-5'-phosphate decarboxylase activity                                                                                                                                                                                         |
| N | Q48SU8 | CC | Cell wall formation                                                                                                                                                                                                                   |
| N | Q48SU8 | CC | Adds enolpyruvyl to UDP-N- acetylglucosamine (By similarity).                                                                                                                                                                         |
| N | Q48SU8 | DE | Enolpyruvate transferase 2;                                                                                                                                                                                                           |
| N | Q48SU8 | DE | UDP-N-acetylglucosamine 1-carboxyvinyltransferase 2;                                                                                                                                                                                  |
| N | Q48SU8 | DE | UDP-N-acetylglucosamine enolpyruvyl transferase 2;                                                                                                                                                                                    |
| N | Q48SU8 | DR | UDP-N-acetylglucosamine biosynthetic process                                                                                                                                                                                          |
| N | Q48SU8 | DR | UDP-N-acetylglucosamine 1-carboxyvinyltransferase activity                                                                                                                                                                            |
| N | Q48SU8 | DR | cell division                                                                                                                                                                                                                         |
| N | Q48SU8 | DR | cellular cell wall organization                                                                                                                                                                                                       |
| N | Q48SU8 | DR | peptidoglycan biosynthetic process                                                                                                                                                                                                    |
| N | Q48SU8 | DR | regulation of cell shape                                                                                                                                                                                                              |
| N | Q48TZ6 | DE | UPF0176 protein M28_Spy0697;                                                                                                                                                                                                          |
| N | Q49184 | CC | DHPS catalyzes the formation of the immediate precursor of folic acid                                                                                                                                                                 |
| N | Q49184 | CC | Implicated in resistance to sulfonamide.                                                                                                                                                                                              |
| N | Q49184 | CC | The type II enzyme is stable whereas type I DHPS loses its activity rapidly (By similarity)                                                                                                                                           |
| N | Q49184 | DE | Dihydropteroate pyrophosphorylase type I;                                                                                                                                                                                             |
| N | Q49184 | DE | Dihydropteroate synthase type I;                                                                                                                                                                                                      |
| N | Q49184 | DE | Dihydropteroate synthase type-I;                                                                                                                                                                                                      |
| N | Q49184 | DR | dihydropteroate synthase activity                                                                                                                                                                                                     |
| N | Q49184 | DR | folic acid biosynthetic process                                                                                                                                                                                                       |
| N | Q49184 | DR | metal ion binding                                                                                                                                                                                                                     |
| N | Q49184 | DR | response to antibiotic                                                                                                                                                                                                                |
| N | Q491Y3 | DE | Triose-phosphate isomerase;                                                                                                                                                                                                           |
| N | Q491Y3 | DE | Triosephosphate isomerase;                                                                                                                                                                                                            |
| N | Q491Y3 | DR | gluconeogenesis                                                                                                                                                                                                                       |
| N | Q491Y3 | DR | pentose-phosphate shunt                                                                                                                                                                                                               |
| N | Q491Y3 | DR | triose-phosphate isomerase activity                                                                                                                                                                                                   |
| N | Q492A5 | DE | 3-dehydroquinate synthase;                                                                                                                                                                                                            |
| N | Q492A5 | DR | 3-dehydroquinate synthase activity                                                                                                                                                                                                    |
| N | Q492A5 | DR | aromatic amino acid family biosynthetic process                                                                                                                                                                                       |
| N | Q49329 | DE | Uncharacterized protein MG269.1;                                                                                                                                                                                                      |
| N | Q493D9 | CC | Accelerates the degradation of transcripts by removing pyrophosphate from the 5'-end of triphosphorylated RNA, leading to a more labile monophosphorylated state that can stimulate subsequent ribonuclease cleavage (By similarity). |

|   |        |    |                                                                                                                                                                                                                                     |
|---|--------|----|-------------------------------------------------------------------------------------------------------------------------------------------------------------------------------------------------------------------------------------|
| N | Q493D9 | DE | (Di)nucleoside polyphosphate hydrolase;                                                                                                                                                                                             |
| N | Q493D9 | DE | RNA pyrophosphohydrolase;                                                                                                                                                                                                           |
| N | Q493D9 | DR | hydrolase activity                                                                                                                                                                                                                  |
| N | Q493I5 | CC | One of the primary rRNA binding proteins, it binds directly to 16S rRNA where it nucleates assembly of the body of the 30S subunit (By similarity).                                                                                 |
| N | Q493I5 | DE | 30S ribosomal protein S4;                                                                                                                                                                                                           |
| N | Q493I5 | DR | structural constituent of ribosome                                                                                                                                                                                                  |
| N | Q493K9 | CC | Involved in the binding of tRNA to the ribosomes (By similarity).                                                                                                                                                                   |
| N | Q493K9 | DE | 30S ribosomal protein S10;                                                                                                                                                                                                          |
| N | Q493K9 | DR | structural constituent of ribosome                                                                                                                                                                                                  |
| N | Q494E6 | CC | Riboflavin synthase is a bifunctional enzyme complex catalyzing the formation of riboflavin from 5-amino-6-(1'-D)- ribityl-amino-2,4(1H,3H)-pyrimidinedione and L-3,4-dihydroxy-2- butanone-4-phosphate via 6,7-dimethyl-8-lumazine |
| N | Q494E6 | CC | The beta subunit catalyzes the condensation of 5-amino-6-(1'-D)-ribityl-amino-2,4(1H,3H)-pyrimidinedione with L-3,4-dihydroxy-2-butanone-4- phosphate yielding 6,7-dimethyl-8-lumazine (By similarity).                             |
| N | Q494E6 | DE | 6,7-dimethyl-8-ribityllumazine synthase;                                                                                                                                                                                            |
| N | Q494E6 | DE | DMRL synthase;                                                                                                                                                                                                                      |
| N | Q494E6 | DE | Lumazine synthase;                                                                                                                                                                                                                  |
| N | Q494E6 | DE | Riboflavin synthase beta chain;                                                                                                                                                                                                     |
| N | Q494E6 | DR | riboflavin biosynthetic process                                                                                                                                                                                                     |
| N | Q494E6 | DR | riboflavin synthase activity                                                                                                                                                                                                        |
| N | Q49536 | CC | Responsible for the antigenic diversity for host adaptation.                                                                                                                                                                        |
| N | Q49536 | DE | Variant surface antigen D;                                                                                                                                                                                                          |
| N | Q49536 | DE | VlpD prolipoprotein;                                                                                                                                                                                                                |
| N | Q498L2 | CC | May act as a general inhibitor of transcription (By similarity).                                                                                                                                                                    |
| N | Q498L2 | DE | SAFB-like transcription modulator;                                                                                                                                                                                                  |
| N | Q498L2 | DR | nucleotide binding                                                                                                                                                                                                                  |
| N | Q49AH0 | CC | Trophic factor for dopamine neurons                                                                                                                                                                                                 |
| N | Q49AH0 | CC | Prevents the 6- hydroxydopamine (6-OHDA)-induced degeneration of dopaminergic neurons                                                                                                                                               |
| N | Q49AH0 | CC | When administered after 6-OHDA-lesioning, restores the dopaminergic function and prevents the degeneration of dopaminergic neurons in substantia nigra (By similarity)                                                              |
| N | Q49AH0 | DE | ARMET-like protein 1;                                                                                                                                                                                                               |
| N | Q49AH0 | DE | Cerebral dopamine neurotrophic factor;                                                                                                                                                                                              |
| N | Q49AH0 | DE | Conserved dopamine neurotrophic factor;                                                                                                                                                                                             |
| N | Q49AH0 | DR | growth factor activity                                                                                                                                                                                                              |
| N | Q49YJ6 | CC | Riboflavin synthase is a bifunctional enzyme complex catalyzing the formation of riboflavin from 5-amino-6-(1'-D)- ribityl-amino-2,4(1H,3H)-pyrimidinedione and L-3,4-dihydroxy-2- butanone-4-phosphate via 6,7-dimethyl-8-lumazine |
| N | Q49YJ6 | CC | The beta subunit catalyzes the condensation of 5-amino-6-(1'-D)-ribityl-amino-2,4(1H,3H)-pyrimidinedione with L-3,4-dihydroxy-2-butanone-4- phosphate yielding 6,7-dimethyl-8-lumazine (By similarity).                             |
| N | Q49YJ6 | DE | 6,7-dimethyl-8-ribityllumazine synthase;                                                                                                                                                                                            |
| N | Q49YJ6 | DE | DMRL synthase;                                                                                                                                                                                                                      |
| N | Q49YJ6 | DE | Lumazine synthase;                                                                                                                                                                                                                  |
| N | Q49YJ6 | DE | Riboflavin synthase beta chain;                                                                                                                                                                                                     |
| N | Q49YJ6 | DR | riboflavin biosynthetic process                                                                                                                                                                                                     |
| N | Q49YJ6 | DR | riboflavin synthase activity                                                                                                                                                                                                        |
| N | Q49ZE2 | CC | DNA-dependent RNA polymerase catalyzes the transcription of DNA into RNA using the four ribonucleoside triphosphates as substrates.                                                                                                 |
| N | Q49ZE2 | DE | DNA-directed RNA polymerase subunit alpha;                                                                                                                                                                                          |
| N | Q49ZE2 | DE | RNA polymerase subunit alpha;                                                                                                                                                                                                       |
| N | Q49ZE2 | DE | RNAP subunit alpha;                                                                                                                                                                                                                 |
| N | Q49ZE2 | DE | Transcriptase subunit alpha;                                                                                                                                                                                                        |
| N | Q49ZE2 | DR | DNA-directed RNA polymerase activity                                                                                                                                                                                                |
| N | Q49ZE2 | DR | protein dimerization activity                                                                                                                                                                                                       |
| N | Q49ZG7 | CC | One of the primary rRNA binding proteins, this protein initially binds near the 5'-end of the 23S rRNA                                                                                                                              |
| N | Q49ZG7 | CC | It is important during the early stages of 50S assembly                                                                                                                                                                             |
| N | Q49ZG7 | CC | It makes multiple contacts with different domains of the 23S rRNA in the assembled 50S subunit and ribosome (By similarity).                                                                                                        |
| N | Q49ZG7 | DE | 50S ribosomal protein L4;                                                                                                                                                                                                           |
| N | Q49ZG7 | DR | structural constituent of ribosome                                                                                                                                                                                                  |
| N | Q49ZR0 | DE | Lysostaphin resistance protein A;                                                                                                                                                                                                   |

|   |        |    |                                                                                                                                                                                                                                                                                                                   |
|---|--------|----|-------------------------------------------------------------------------------------------------------------------------------------------------------------------------------------------------------------------------------------------------------------------------------------------------------------------|
| N | Q49ZU9 | DE | Fd-NADP+ reductase;                                                                                                                                                                                                                                                                                               |
| N | Q49ZU9 | DE | Ferredoxin--NADP reductase;                                                                                                                                                                                                                                                                                       |
| N | Q49ZU9 | DR | ferredoxin-NADP+ reductase activity                                                                                                                                                                                                                                                                               |
| N | Q49ZU9 | DR | flavin adenine dinucleotide binding                                                                                                                                                                                                                                                                               |
| N | Q49ZU9 | DR | oxidation-reduction process                                                                                                                                                                                                                                                                                       |
| N | Q4A180 | CC | plays an important role in the initiation and regulation of chromosomal replication                                                                                                                                                                                                                               |
| N | Q4A180 | CC | Binds to the origin of replication; it binds specifically double-stranded DNA at a 9 bp consensus (dnaA box): 5'-TTATC[CA]A[CA]A-3'                                                                                                                                                                               |
| N | Q4A180 | CC | DnaA binds to ATP and to acidic phospholipids (By similarity).                                                                                                                                                                                                                                                    |
| N | Q4A180 | DE | Chromosomal replication initiator protein DnaA;                                                                                                                                                                                                                                                                   |
| N | Q4A180 | DR | DNA replication origin binding                                                                                                                                                                                                                                                                                    |
| N | Q4A180 | DR | DNA-dependent DNA replication initiation                                                                                                                                                                                                                                                                          |
| N | Q4A180 | DR | nucleoside-triphosphatase activity                                                                                                                                                                                                                                                                                |
| N | Q4A180 | DR | regulation of DNA replication                                                                                                                                                                                                                                                                                     |
| N | Q4A8K7 | CC | Involved in rRNA and/or ribosome maturation and assembly                                                                                                                                                                                                                                                          |
| N | Q4A8K7 | CC | May have metal-dependent hydrolase activity (By similarity).                                                                                                                                                                                                                                                      |
| N | Q4A8K7 | CC | Required for normal 5' and 3' processing of 16S, 23S and 5S rRNAs                                                                                                                                                                                                                                                 |
| N | Q4A8K7 | DE | Probable rRNA maturation factor;                                                                                                                                                                                                                                                                                  |
| N | Q4A8K7 | DR | metal ion binding                                                                                                                                                                                                                                                                                                 |
| N | Q4A8K7 | DR | metalloendopeptidase activity                                                                                                                                                                                                                                                                                     |
| N | Q4A8K7 | DR | rRNA processing                                                                                                                                                                                                                                                                                                   |
| N | Q4FNA5 | CC | Part of the Sec protein translocase complex                                                                                                                                                                                                                                                                       |
| N | Q4FNA5 | CC | Has a central role in coupling the hydrolysis of ATP to the transfer of proteins into and across the cell membrane, serving both as a receptor for the preprotein-secB complex and as an ATP-driven molecular motor driving the stepwise translocation of polypeptide chains across the membrane (By similarity). |
| N | Q4FNA5 | CC | Interacts with the secYEG preprotein conducting channel                                                                                                                                                                                                                                                           |
| N | Q4FNA5 | DE | Protein translocase subunit secA;                                                                                                                                                                                                                                                                                 |
| N | Q4FNA5 | DR | protein import                                                                                                                                                                                                                                                                                                    |
| N | Q4FNA5 | DR | protein targeting                                                                                                                                                                                                                                                                                                 |
| N | Q4FNA5 | DR | transmembrane transport                                                                                                                                                                                                                                                                                           |
| N | Q4FRX3 | DE | NAD-dependent malic enzyme;                                                                                                                                                                                                                                                                                       |
| N | Q4FRX3 | DR | malate dehydrogenase (oxaloacetate-decarboxylating) activity                                                                                                                                                                                                                                                      |
| N | Q4FRX3 | DR | malate metabolic process                                                                                                                                                                                                                                                                                          |
| N | Q4FRX3 | DR | metal ion binding                                                                                                                                                                                                                                                                                                 |
| N | Q4FRX3 | DR | oxidation-reduction process                                                                                                                                                                                                                                                                                       |
| N | Q4FZF3 | DE | DEAD box protein 49;                                                                                                                                                                                                                                                                                              |
| N | Q4FZF3 | DE | Probable ATP-dependent RNA helicase DDX49;                                                                                                                                                                                                                                                                        |
| N | Q4FZF3 | DR | ATP-dependent helicase activity                                                                                                                                                                                                                                                                                   |
| N | Q4FZU3 | DE | Coiled-coil domain-containing protein 55;                                                                                                                                                                                                                                                                         |
| N | Q4G0G2 | DE | Putative uncharacterized protein C3orf47;                                                                                                                                                                                                                                                                         |
| N | Q4G3D9 | DE | 30S ribosomal protein S18, chloroplastic;                                                                                                                                                                                                                                                                         |
| N | Q4G3D9 | DR | structural constituent of ribosome                                                                                                                                                                                                                                                                                |
| N | Q4I7S1 | CC | Component of the SWR1 complex which mediates the ATP- dependent exchange of histone H2A for the H2A variant HZT1 leading to transcriptional regulation of selected genes by chromatin remodeling                                                                                                                  |
| N | Q4I7S1 | CC | Component of the NuA4 histone acetyltransferase complex which is involved in transcriptional activation of selected genes principally by acetylation of nucleosomal histones H4 and H2A                                                                                                                           |
| N | Q4I7S1 | CC | The NuA4 complex is also involved in DNA repair                                                                                                                                                                                                                                                                   |
| N | Q4I7S1 | CC | Yaf9 may also be required for viability in conditions in which the structural integrity of the spindle is compromised (By similarity).                                                                                                                                                                            |
| N | Q4I7S1 | DE | Protein AF-9 homolog;                                                                                                                                                                                                                                                                                             |
| N | Q4I7S1 | DR | chromatin modification                                                                                                                                                                                                                                                                                            |
| N | Q4I7S1 | DR | regulation of transcription, DNA-dependent                                                                                                                                                                                                                                                                        |
| N | Q4I830 | CC | ATP-binding RNA helicase involved in ribosome assembly (By similarity).                                                                                                                                                                                                                                           |
| N | Q4I830 | DE | ATP-dependent RNA helicase DRS1;                                                                                                                                                                                                                                                                                  |
| N | Q4I830 | DR | ATP-dependent helicase activity                                                                                                                                                                                                                                                                                   |
| N | Q4I830 | DR | ribosome biogenesis                                                                                                                                                                                                                                                                                               |
| N | Q4J8I5 | CC | IGPS catalyzes the conversion of PRFAR and glutamine to IGF, AICAR and the msH subunit provides the glutamine amidotransferase activity that produces the ammonia necessary to hisF for the synthesis of IGP and AICAR (By similarity)                                                                            |
| N | Q4J8I5 | CC |                                                                                                                                                                                                                                                                                                                   |
| N | Q4J8I5 | DE | IGP synthase glutamine amidotransferase subunit;                                                                                                                                                                                                                                                                  |
| N | Q4J8I5 | DE | IGP synthase subunit hisH;                                                                                                                                                                                                                                                                                        |
| N | Q4J8I5 | DE | IGPS subunit hisH;                                                                                                                                                                                                                                                                                                |

|   |        |    |                                                                                                                                                                                                                                     |
|---|--------|----|-------------------------------------------------------------------------------------------------------------------------------------------------------------------------------------------------------------------------------------|
| N | Q4J8I5 | DE | ImGP synthase subunit hisH;                                                                                                                                                                                                         |
| N | Q4J8I5 | DE | Imidazole glycerol phosphate synthase subunit hisH;                                                                                                                                                                                 |
| N | Q4J8I5 | DR | glutamine metabolic process                                                                                                                                                                                                         |
| N | Q4J8I5 | DR | histidine biosynthetic process                                                                                                                                                                                                      |
| N | Q4J8I5 | DR | transferase activity, transferring pentosyl groups<br>required for the formation of a threonylcarbamoyl group on adenosine at<br>position 37 (t(6)A37) in tRNAs that read codons beginning with adenine (By<br>similarity)          |
| N | Q4JAG1 | CC | Probable tRNA threonylcarbamoyladenine biosynthesis protein KAE1<br>homolog;                                                                                                                                                        |
| N | Q4JAG1 | DE | t(6)A37 threonylcarbamoyladenine biosynthesis protein KAE1 homolog;                                                                                                                                                                 |
| N | Q4JAG1 | DR | metal ion binding                                                                                                                                                                                                                   |
| N | Q4JAG1 | DR | metalloendopeptidase activity                                                                                                                                                                                                       |
| N | Q4JC76 | DE | 3-dehydroquinate synthase;                                                                                                                                                                                                          |
| N | Q4JC76 | DR | 3-dehydroquinate synthase activity                                                                                                                                                                                                  |
| N | Q4JC76 | DR | aromatic amino acid family biosynthetic process                                                                                                                                                                                     |
| N | Q4JIM4 | CC | Probable catalytic subunit of the gamma-secretase complex, an endoprotease<br>complex that catalyzes the intramembrane cleavage of integral membrane<br>proteins such as Notch receptors and APP (beta-amyloid precursor protein)   |
| N | Q4JIM4 | CC | May also play a role in hematopoiesis (By similarity).                                                                                                                                                                              |
| N | Q4JIM4 | CC | May play a role in intracellular signaling and gene expression or in linking<br>chromatin to the nuclear membrane                                                                                                                   |
| N | Q4JIM4 | CC | Requires the other members of the gamma-secretase complex to have a protease<br>activity                                                                                                                                            |
| N | Q4JIM4 | CC | Stimulates cell-cell adhesion through its association with the E-cadherin/catenin<br>complex                                                                                                                                        |
| N | Q4JIM4 | CC | Under conditions of apoptosis or calcium influx, cleaves E-cadherin promoting<br>the disassembly of the E-cadherin/catenin complex and increasing the pool of<br>cytoplasmic beta-catenin, thus negatively regulating Wnt signaling |
| N | Q4JIM4 | DE | Presenilin-1 CTF subunit;                                                                                                                                                                                                           |
| N | Q4JIM4 | DE | Presenilin-1 NTF subunit;                                                                                                                                                                                                           |
| N | Q4JIM4 | DE | Presenilin-1;                                                                                                                                                                                                                       |
| N | Q4JIM4 | DR | Notch receptor processing                                                                                                                                                                                                           |
| N | Q4JIM4 | DR | Notch signaling pathway                                                                                                                                                                                                             |
| N | Q4JIM4 | DR | amyloid precursor protein catabolic process                                                                                                                                                                                         |
| N | Q4JIM4 | DR | anti-apoptosis                                                                                                                                                                                                                      |
| N | Q4JIM4 | DR | beta-amyloid metabolic process                                                                                                                                                                                                      |
| N | Q4JIM4 | DR | cadherin binding                                                                                                                                                                                                                    |
| N | Q4JIM4 | DR | endopeptidase activity                                                                                                                                                                                                              |
| N | Q4JIM4 | DR | membrane protein ectodomain proteolysis                                                                                                                                                                                             |
| N | Q4JIM4 | DR | smooth endoplasmic reticulum calcium ion homeostasis                                                                                                                                                                                |
| N | Q4JQW5 | CC | Transcriptional activator of immediate-early (IE) gene products (alpha genes)                                                                                                                                                       |
| N | Q4JQW5 | CC | Acts as a key activator of lytic infection by initiating the lytic program through<br>the assembly of the transcriptional regulatory VP16-induced complex composed<br>of VP16 and two cellular factors, HCFC1 and POU2F 1           |
| N | Q4JQW5 | CC | VP16-induced complex represents a regulatory switch: when it is on, it promotes<br>IE-gene expression and thus lytic infection, and when it is off, it limits IE-gene<br>transcription favoring latent infection (By similarity).   |
| N | Q4JQW5 | DE | Alpha trans-inducing protein;                                                                                                                                                                                                       |
| N | Q4JQW5 | DE | ORF10 protein;                                                                                                                                                                                                                      |
| N | Q4JQW5 | DE | Tegument protein 10;                                                                                                                                                                                                                |
| N | Q4JQW5 | DE | Tegument protein VP16 homolog;                                                                                                                                                                                                      |
| N | Q4JQW5 | DR | regulation of transcription, DNA-dependent                                                                                                                                                                                          |
| N | Q4JTF1 | CC | Binds to Cpn60 in the presence of Mg-ATP and suppresses the ATPase activity<br>of the latter.                                                                                                                                       |
| N | Q4JTF1 | DE | 10 kDa chaperonin;                                                                                                                                                                                                                  |
| N | Q4JTF1 | DE | GroES protein;                                                                                                                                                                                                                      |
| N | Q4JTF1 | DE | Protein Cpn10;                                                                                                                                                                                                                      |
| N | Q4JTF1 | DR | protein folding                                                                                                                                                                                                                     |
| N | Q4JUI9 | CC | Peptide chain release factor 1 directs the termination of translation in response to<br>the peptide chain termination codons UAG and UAA (By similarity).                                                                           |
| N | Q4JUI9 | DE | Peptide chain release factor 1;                                                                                                                                                                                                     |
| N | Q4JUI9 | DR | translation release factor activity, codon specific                                                                                                                                                                                 |
| N | Q4JUL8 | CC | DNA ligase that catalyzes the formation of phosphodiester linkages between 5'-<br>phosphoryl and 3'-hydroxyl groups in double-stranded DNA using NAD as a<br>coenzyme and as the energy source for the reaction                     |
| N | Q4JUL8 | CC | It is essential for DNA replication and repair of damaged DNA (By similarity).                                                                                                                                                      |
| N | Q4JUL8 | DE | Polydeoxyribonucleotide synthase [NAD+];                                                                                                                                                                                            |
| N | Q4JUL8 | DR | DNA ligase (NAD+) activity                                                                                                                                                                                                          |



|   |        |    |                                                                                                                                                                                                                                                                                                                   |
|---|--------|----|-------------------------------------------------------------------------------------------------------------------------------------------------------------------------------------------------------------------------------------------------------------------------------------------------------------------|
| N | Q4JUL8 | DR | DNA replication                                                                                                                                                                                                                                                                                                   |
| N | Q4JUL8 | DR | metal ion binding                                                                                                                                                                                                                                                                                                 |
| N | Q4JVU1 | CC | Part of the Sec protein translocase complex<br>Has a central role in coupling the hydrolysis of ATP to the transfer of proteins<br>into and across the cell membrane, serving as an ATP-driven molecular motor<br>driving the stepwise translocation of polypeptide chains across the membrane (By<br>similarity) |
| N | Q4JVU1 | CC |                                                                                                                                                                                                                                                                                                                   |
| N | Q4JVU1 | CC | Interacts with the secYEG preprotein conducting channel                                                                                                                                                                                                                                                           |
| N | Q4JVU1 | DE | Protein translocase subunit secA 2;                                                                                                                                                                                                                                                                               |
| N | Q4JVU1 | DR | protein import                                                                                                                                                                                                                                                                                                    |
| N | Q4JVU1 | DR | protein targeting                                                                                                                                                                                                                                                                                                 |
| N | Q4JVU1 | DR | transmembrane transport                                                                                                                                                                                                                                                                                           |
| N | Q4JX93 | DE | UPF0271 protein jk0407;                                                                                                                                                                                                                                                                                           |
| N | Q4JX93 | DR | carbohydrate metabolic process                                                                                                                                                                                                                                                                                    |
| N | Q4JX93 | DR | catalytic activity                                                                                                                                                                                                                                                                                                |
| N | Q4K898 | CC | Catalyzes the formation of 5-methyl-uridine at position 1939 (M-5-U1939) in<br>23S rRNA (By similarity).                                                                                                                                                                                                          |
| N | Q4K898 | DE | 23S rRNA (uracil-5-)-methyltransferase RumA;                                                                                                                                                                                                                                                                      |
| N | Q4K898 | DE | 23S rRNA(M-5-U1939)-methyltransferase;                                                                                                                                                                                                                                                                            |
| N | Q4K898 | DR | 4 iron, 4 sulfur cluster binding                                                                                                                                                                                                                                                                                  |
| N | Q4K898 | DR | RNA methyltransferase activity                                                                                                                                                                                                                                                                                    |
| N | Q4K898 | DR | metal ion binding                                                                                                                                                                                                                                                                                                 |
| N | Q4K898 | DR | rRNA processing                                                                                                                                                                                                                                                                                                   |
| N | Q4KHT3 | CC | Required for accurate and efficient protein synthesis under certain stress<br>conditions                                                                                                                                                                                                                          |
| N | Q4KHT3 | CC | Back- translocation proceeds from a post-translocation (POST) complex to a pre-<br>translocation (PRE) complex, thus giving elongation factor G a second chance to<br>translocate the tRNAs correctly                                                                                                             |
| N | Q4KHT3 | CC | Binds to ribosomes in a GTP-dependent manner (By similarity).                                                                                                                                                                                                                                                     |
| N | Q4KHT3 | CC | May act as a fidelity factor of the translation reaction, by catalyzing a one-codon<br>backward translocation of tRNAs on improperly translocated ribosomes                                                                                                                                                       |
| N | Q4KHT3 | DE | Elongation factor 4;                                                                                                                                                                                                                                                                                              |
| N | Q4KHT3 | DE | Ribosomal back-translocase LepA;                                                                                                                                                                                                                                                                                  |
| N | Q4KHT3 | DR | GTPase activity                                                                                                                                                                                                                                                                                                   |
| N | Q4KWH8 | CC | The production of the second messenger molecules diacylglycerol (DAG) and<br>inositol 1,4,5-trisphosphate (IP3) is mediated by calcium-activated<br>phosphatidylinositol-specific phospholipase C enzymes.                                                                                                        |
| N | Q4KWH8 | DE | 1-phosphatidylinositol-4,5-bisphosphate phosphodiesterase eta-1;                                                                                                                                                                                                                                                  |
| N | Q4KWH8 | DE | Phosphoinositide phospholipase C-eta-1;                                                                                                                                                                                                                                                                           |
| N | Q4KWH8 | DE | Phospholipase C-eta-1;                                                                                                                                                                                                                                                                                            |
| N | Q4KWH8 | DE | Phospholipase C-like protein 3;                                                                                                                                                                                                                                                                                   |
| N | Q4KWH8 | DR | calcium ion binding                                                                                                                                                                                                                                                                                               |
| N | Q4KWH8 | DR | calcium-dependent phospholipase C activity                                                                                                                                                                                                                                                                        |
| N | Q4KWH8 | DR | lipid catabolic process                                                                                                                                                                                                                                                                                           |
| N | Q4KWH8 | DR | phosphatidylinositol phospholipase C activity                                                                                                                                                                                                                                                                     |
| N | Q4KWH8 | DR | phosphatidylinositol-mediated signaling                                                                                                                                                                                                                                                                           |
| N | Q4KWH8 | DR | signal transducer activity                                                                                                                                                                                                                                                                                        |
| N | Q4L3G8 | CC | Acts as a processive, ATP-dependent zinc metallopeptidase for both cytoplasmic<br>and membrane proteins                                                                                                                                                                                                           |
| N | Q4L3G8 | CC | Plays a role in the quality control of integral membrane proteins (By similarity).                                                                                                                                                                                                                                |
| N | Q4L3G8 | DE | ATP-dependent zinc metalloprotease FtsH;                                                                                                                                                                                                                                                                          |
| N | Q4L3G8 | DR | metalloendopeptidase activity                                                                                                                                                                                                                                                                                     |
| N | Q4L3G8 | DR | nucleoside-triphosphatase activity                                                                                                                                                                                                                                                                                |
| N | Q4L3G8 | DR | protein catabolic process                                                                                                                                                                                                                                                                                         |
| N | Q4L3G8 | DR | zinc ion binding                                                                                                                                                                                                                                                                                                  |
| N | Q4L6T4 | CC | Required for accurate and efficient protein synthesis under certain stress<br>conditions                                                                                                                                                                                                                          |
| N | Q4L6T4 | CC | Back- translocation proceeds from a post-translocation (POST) complex to a pre-<br>translocation (PRE) complex, thus giving elongation factor G a second chance to<br>translocate the tRNAs correctly                                                                                                             |
| N | Q4L6T4 | CC | Binds to ribosomes in a GTP-dependent manner (By similarity).                                                                                                                                                                                                                                                     |
| N | Q4L6T4 | CC | May act as a fidelity factor of the translation reaction, by catalyzing a one-codon<br>backward translocation of tRNAs on improperly translocated ribosomes                                                                                                                                                       |
| N | Q4L6T4 | DE | Elongation factor 4;                                                                                                                                                                                                                                                                                              |
| N | Q4L6T4 | DE | Ribosomal back-translocase LepA;                                                                                                                                                                                                                                                                                  |
| N | Q4L6T4 | DR | GTPase activity                                                                                                                                                                                                                                                                                                   |
| N | Q4L6W8 | CC | Catalyzes the 2-thiolation of uridine at the wobble position (U34) of tRNA,<br>leading to the formation of s(2)U34 (By similarity).                                                                                                                                                                               |

|   |        |    |                                                                                                                                                                                                                                                                                            |
|---|--------|----|--------------------------------------------------------------------------------------------------------------------------------------------------------------------------------------------------------------------------------------------------------------------------------------------|
| N | Q4L6W8 | DE | tRNA-specific 2-thiouridylase mnmA;                                                                                                                                                                                                                                                        |
| N | Q4L6W8 | DR | tRNA processing                                                                                                                                                                                                                                                                            |
| N | Q4L6W8 | DR | transferase activity                                                                                                                                                                                                                                                                       |
| N | Q4L7I0 | CC | Involved in the biosynthesis of cell wall peptidoglycan                                                                                                                                                                                                                                    |
| N | Q4L7I0 | CC | Responsible for the elongation of the glycan strands using lipid- linked disaccharide-pentapeptide as the substrate (By similarity).                                                                                                                                                       |
| N | Q4L7I0 | DE | Monofunctional glycosyltransferase;                                                                                                                                                                                                                                                        |
| N | Q4L7I0 | DE | Peptidoglycan TGase;                                                                                                                                                                                                                                                                       |
| N | Q4L7I0 | DR | cellular cell wall organization                                                                                                                                                                                                                                                            |
| N | Q4L7I0 | DR | peptidoglycan biosynthetic process                                                                                                                                                                                                                                                         |
| N | Q4L7I0 | DR | regulation of cell shape                                                                                                                                                                                                                                                                   |
| N | Q4L7I0 | DR | transferase activity, transferring glycosyl groups                                                                                                                                                                                                                                         |
| N | Q4L7K3 | DE | UPF0421 protein SH1063;                                                                                                                                                                                                                                                                    |
| N | Q4N3P0 | DE | 40S ribosomal protein S8;                                                                                                                                                                                                                                                                  |
| N | Q4N3P0 | DR | structural constituent of ribosome                                                                                                                                                                                                                                                         |
| N | Q4P5F5 | CC | Essential component of the cytosolic iron-sulfur (Fe/S) protein assembly machinery                                                                                                                                                                                                         |
| N | Q4P5F5 | CC | Required for the maturation of extramitochondrial Fe/S proteins (By similarity).                                                                                                                                                                                                           |
| N | Q4P5F5 | DE | Probable cytosolic iron-sulfur protein assembly protein 1;                                                                                                                                                                                                                                 |
| N | Q4PDF6 | CC | Catalytic subunit of the SLX1-SLX4 structure-specific endonuclease that resolves DNA secondary structures generated during DNA repair and recombination                                                                                                                                    |
| N | Q4PDF6 | CC | Has endonuclease activity towards branched DNA substrates, introducing single-strand cuts in duplex DNA close to junctions with ss-DNA (By similarity).                                                                                                                                    |
| N | Q4PDF6 | DE | Structure-specific endonuclease subunit SLX1;                                                                                                                                                                                                                                              |
| N | Q4PDF6 | DR | DNA recombination                                                                                                                                                                                                                                                                          |
| N | Q4PDF6 | DR | endonuclease activity                                                                                                                                                                                                                                                                      |
| N | Q4QM29 | DE | 50S ribosomal protein L27;                                                                                                                                                                                                                                                                 |
| N | Q4QM29 | DR | structural constituent of ribosome                                                                                                                                                                                                                                                         |
| N | Q4QMA9 | CC | This is 1 of the proteins that binds and probably mediates the attachment of the 5S rRNA into the large ribosomal subunit, where it forms part of the central protuberance                                                                                                                 |
| N | Q4QMA9 | CC | Contacts the P site tRNA; the 5S rRNA and some of its associated proteins might help stabilize positioning of ribosome-bound tRNAs (By similarity).                                                                                                                                        |
| N | Q4QMA9 | CC | In the 70S ribosome it contacts protein S13 of the 30S subunit (bridge B1b), connecting the 2 subunits; this bridge is implicated in subunit movement                                                                                                                                      |
| N | Q4QMA9 | DE | 50S ribosomal protein L5;                                                                                                                                                                                                                                                                  |
| N | Q4QMA9 | DR | structural constituent of ribosome                                                                                                                                                                                                                                                         |
| N | Q4QMZ9 | CC | Specifically dimethylates two adjacent adenosines (A1518 and A1519) in the loop of a conserved hairpin near the 3'-end of 16S rRNA in the 30S particle                                                                                                                                     |
| N | Q4QMZ9 | CC | May play a critical role in biogenesis of 30S subunits (By similarity).                                                                                                                                                                                                                    |
| N | Q4QMZ9 | DE | 16S rRNA (adenine(1518)-N(6)/adenine(1519)-N(6))-dimethyltransferase;                                                                                                                                                                                                                      |
| N | Q4QMZ9 | DE | 16S rRNA dimethyladenosine transferase;                                                                                                                                                                                                                                                    |
| N | Q4QMZ9 | DE | 16S rRNA dimethylase;                                                                                                                                                                                                                                                                      |
| N | Q4QMZ9 | DE | Ribosomal RNA small subunit methyltransferase A;                                                                                                                                                                                                                                           |
| N | Q4QMZ9 | DE | S-adenosylmethionine-6-N', N'-adenosyl(rRNA) dimethyltransferase;                                                                                                                                                                                                                          |
| N | Q4QMZ9 | DR | rRNA (adenine-N6,N6-)-dimethyltransferase activity                                                                                                                                                                                                                                         |
| N | Q4QP20 | CC | NQR complex catalyzes the reduction of ubiquinone-1 to ubiquinol by two successive reactions, coupled with the transport of Na(+) ions from the cytoplasm to the periplasm                                                                                                                 |
| N | Q4QP20 | CC | NqrA to nqrE are probably involved in the second step, the conversion of ubisemiquinone to ubiquinol (By similarity).                                                                                                                                                                      |
| N | Q4QP20 | DE | NQR complex subunit E;                                                                                                                                                                                                                                                                     |
| N | Q4QP20 | DE | NQR-1 subunit E;                                                                                                                                                                                                                                                                           |
| N | Q4QP20 | DE | Na(+)-NQR subunit E;                                                                                                                                                                                                                                                                       |
| N | Q4QP20 | DE | Na(+)-translocating NADH-quinone reductase subunit E;                                                                                                                                                                                                                                      |
| N | Q4QP20 | DE | Na(+)-translocating NQR subunit E;                                                                                                                                                                                                                                                         |
| N | Q4QP20 | DR | oxidoreductase activity, acting on NADH or NADPH, quinone or similar compound as acceptor                                                                                                                                                                                                  |
| N | Q4QP20 | DR | respiratory electron transport chain                                                                                                                                                                                                                                                       |
| N | Q4QP20 | DR | sodium ion transport                                                                                                                                                                                                                                                                       |
| N | Q4QR85 | CC | Non-catalytic component of the 20S PRMT5-containing methyltransferase complex, which modifies specific arginines to dimethylarginines in several cellularosomal Sm proteins                                                                                                                |
| N | Q4QR85 | CC | Might play a role in transcription regulation                                                                                                                                                                                                                                              |
| N | Q4QR85 | CC | The 20S PRMT5-containing methyltransferase complex also methylates the Piwi proteins (PIWIL1, PIWIL2 and PIWIL4), methylation of Piwi proteins being required for the interaction with Tudor domain- containing proteins and subsequent localization to the meiotic nuage (By similarity). |

|   |        |    |                                                                                                                                                                                                                        |
|---|--------|----|------------------------------------------------------------------------------------------------------------------------------------------------------------------------------------------------------------------------|
| N | Q4QR85 | CC | This modification targets Sm proteins to the survival of motor neurons (SMN) complex for assembly into small nuclear ribonucleoprotein core particles                                                                  |
| N | Q4QR85 | DE | Methylosome protein 50;                                                                                                                                                                                                |
| N | Q4QR85 | DE | WD repeat-containing protein 77;                                                                                                                                                                                       |
| N | Q4R6B2 | CC | probably involved in sperm cell hyperactivation via its association with CATSPER1                                                                                                                                      |
| N | Q4R6B2 | CC | Sperm cell hyperactivation is needed for sperm motility which is essential late in the preparation of sperm for fertilization (By similarity).                                                                         |
| N | Q4R6B2 | DE | Cation channel sperm-associated protein subunit gamma;                                                                                                                                                                 |
| N | Q4R6B2 | DR | cell differentiation                                                                                                                                                                                                   |
| N | Q4R6B2 | DR | multicellular organismal development                                                                                                                                                                                   |
| N | Q4R6B2 | DR | spermatogenesis                                                                                                                                                                                                        |
| N | Q4R6Y6 | CC | Part of the SNAPc complex required for the transcription of both RNA polymerase II and III small-nuclear RNA genes                                                                                                     |
| N | Q4R6Y6 | CC | Binds to the proximal sequence element (PSE), a non-TATA-box basal promoter element common to these 2 types of genes                                                                                                   |
| N | Q4R6Y6 | CC | Recruits TBP and BRF2 to the U6 snRNA TATA box (By similarity).                                                                                                                                                        |
| N | Q4R6Y6 | DE | SNAPc subunit 3;                                                                                                                                                                                                       |
| N | Q4R6Y6 | DE | Small nuclear RNA-activating complex polypeptide 3;                                                                                                                                                                    |
| N | Q4R6Y6 | DE | snRNA-activating protein complex subunit 3;                                                                                                                                                                            |
| N | Q4R998 | DE | MAGE-B18 antigen;                                                                                                                                                                                                      |
| N | Q4R998 | DE | Melanoma-associated antigen B18;                                                                                                                                                                                       |
| N | Q4R9D1 | CC | Accepts ubiquitin from the E1 complex and catalyzes its covalent attachment to other proteins                                                                                                                          |
| N | Q4R9D1 | CC | Acts as an essential factor of the anaphase promoting complex/cyclosome (APC/C), a cell cycle-regulated ubiquitin ligase that controls progression through mitosis                                                     |
| N | Q4R9D1 | CC | Acts by initiating 'Lys-11'-linked polyubiquitin chains on APC/C substrates, leading to the degradation of APC/C substrates by the proteasome and promoting mitotic exit (By similarity).                              |
| N | Q4R9D1 | CC | In vitro catalyzes 'Lys-11'- and 'Lys-48'-linked polyubiquitination                                                                                                                                                    |
| N | Q4R9D1 | DE | Ubiquitin carrier protein C;                                                                                                                                                                                           |
| N | Q4R9D1 | DE | Ubiquitin-conjugating enzyme E2 C;                                                                                                                                                                                     |
| N | Q4R9D1 | DE | Ubiquitin-protein ligase C;                                                                                                                                                                                            |
| N | Q4R9D1 | DR | anaphase-promoting complex-dependent proteasomal ubiquitin-dependent protein catabolic process                                                                                                                         |
| N | Q4R9D1 | DR | cell division                                                                                                                                                                                                          |
| N | Q4R9D1 | DR | exit from mitosis                                                                                                                                                                                                      |
| N | Q4R9D1 | DR | free ubiquitin chain polymerization                                                                                                                                                                                    |
| N | Q4R9D1 | DR | post-translational protein modification                                                                                                                                                                                |
| N | Q4R9D1 | DR | protein K11-linked ubiquitination                                                                                                                                                                                      |
| N | Q4R9D1 | DR | protein K48-linked ubiquitination                                                                                                                                                                                      |
| N | Q4R9D1 | DR | ubiquitin-protein ligase activity                                                                                                                                                                                      |
| N | Q4TWH8 | CC | Non-structural polyprotein 1AB contains the viral protease participating in the cleavage of the polyprotein into functional products                                                                                   |
| N | Q4TWH8 | CC | It contains also the activities necessary for replication of genomic RNA, as well as transcription of subgenomic mRNA (By similarity).                                                                                 |
| N | Q4TWH8 | DE | Non-structural polyprotein 1AB;                                                                                                                                                                                        |
| N | Q4TWH8 | DE | Protein p19;                                                                                                                                                                                                           |
| N | Q4TWH8 | DE | Protein p20;                                                                                                                                                                                                           |
| N | Q4TWH8 | DE | RNA-directed RNA polymerase p57;                                                                                                                                                                                       |
| N | Q4TWH8 | DE | Serine protease p27;                                                                                                                                                                                                   |
| N | Q4TWH8 | DE | Transmembrane protein 1A;                                                                                                                                                                                              |
| N | Q4TWH8 | DR | RNA-directed RNA polymerase activity                                                                                                                                                                                   |
| N | Q4TWH8 | DR | cysteine-type peptidase activity                                                                                                                                                                                       |
| N | Q4TWH8 | DR | serine-type endopeptidase activity                                                                                                                                                                                     |
| N | Q4TWH8 | DR | serine-type exopeptidase activity                                                                                                                                                                                      |
| N | Q4TWH8 | DR | viral genome replication                                                                                                                                                                                               |
| N | Q4UJM4 | CC | Component of the ubiquinol-cytochrome c reductase complex (complex III or cytochrome b-c1 complex), which is a respiratory chain that generates an electrochemical potential coupled to ATP synthesis (By similarity). |
| N | Q4UJM4 | DE | Cytochrome b;                                                                                                                                                                                                          |
| N | Q4UJM4 | DR | electron carrier activity                                                                                                                                                                                              |
| N | Q4UJM4 | DR | metal ion binding                                                                                                                                                                                                      |
| N | Q4UJM4 | DR | oxidoreductase activity                                                                                                                                                                                                |
| N | Q4UJM4 | DR | respiratory electron transport chain                                                                                                                                                                                   |

|   |        |    |                                                                                                                                                                                     |
|---|--------|----|-------------------------------------------------------------------------------------------------------------------------------------------------------------------------------------|
| N | Q4ULR1 | CC | Binds specifically to the ssrA RNA (tmRNA) and is required for stable association of ssrA with ribosomes (By similarity).                                                           |
| N | Q4ULR1 | DE | SsrA-binding protein;                                                                                                                                                               |
| N | Q4UMZ7 | CC | Part of the ABC transporter complex LolCDE involved in the translocation of mature outer membrane-directed lipoproteins, from the inner membrane to the periplasmic chaperone, LolA |
| N | Q4UMZ7 | CC | Responsible for the formation of the LolA-lipoprotein complex in an ATP-dependent manner (By similarity).                                                                           |
| N | Q4UMZ7 | DE | Lipoprotein-releasing system ATP-binding protein LolD;                                                                                                                              |
| N | Q4UMZ7 | DR | ATPase activity                                                                                                                                                                     |
| N | Q4UMZ7 | DR | lipoprotein transporter activity                                                                                                                                                    |
| N | Q4UN32 | DE | SURF1-like protein;                                                                                                                                                                 |
| N | Q4UPQ3 | CC | Catalyzes the transfer of a ribosyl phosphate group from 5-phosphoribose 1-diphosphate to orotate, leading to the formation of orotidine monophosphate (OMP) (By similarity).       |
| N | Q4UPQ3 | DE | Orotate phosphoribosyltransferase;                                                                                                                                                  |
| N | Q4UPQ3 | DR | nucleoside metabolic process                                                                                                                                                        |
| N | Q4UPQ3 | DR | orotate phosphoribosyltransferase activity                                                                                                                                          |
| N | Q4UPQ3 | DR | pyrimidine nucleotide biosynthetic process                                                                                                                                          |
| N | Q4UPU5 | CC | Required for the formation of a threonylcarbamoyl group on adenosine at position 37 (t(6)A37) in tRNAs that read codons beginning with adenine (By similarity).                     |
| N | Q4UPU5 | DE | Probable tRNA threonylcarbamoyladenine biosynthesis protein Gcp;                                                                                                                    |
| N | Q4UPU5 | DE | t(6)A37 threonylcarbamoyladenine biosynthesis protein;                                                                                                                              |
| N | Q4UPU5 | DR | metal ion binding                                                                                                                                                                   |
| N | Q4UPU5 | DR | metalloendopeptidase activity                                                                                                                                                       |
| N | Q4UQT7 | CC | Negatively regulates transcription of bacterial ribonucleotide reductase nrd genes and operons by binding to NrdR- boxes (By similarity).                                           |
| N | Q4UQT7 | DE | Transcriptional repressor NrdR;                                                                                                                                                     |
| N | Q4UQT7 | DR | transcription repressor activity                                                                                                                                                    |
| N | Q4UQT7 | DR | zinc ion binding                                                                                                                                                                    |
| N | Q4UTC7 | CC | Is probably involved in the electron transfer between its heme and the molybdenum cofactor of the reductase catalytic subunit yedY (By similarity).                                 |
| N | Q4UTC7 | DE | Flavocytochrome yedZ;                                                                                                                                                               |
| N | Q4UTC7 | DE | Sulfoxide reductase heme-binding subunit yedZ;                                                                                                                                      |
| N | Q4UTC7 | DR | electron carrier activity                                                                                                                                                           |
| N | Q4UTC7 | DR | electron transport chain                                                                                                                                                            |
| N | Q4UTC7 | DR | flavin adenine dinucleotide binding                                                                                                                                                 |
| N | Q4UTC7 | DR | iron ion binding                                                                                                                                                                    |
| N | Q4UTC7 | DR | oxidoreductase activity                                                                                                                                                             |
| N | Q4UWY7 | DE | Aspartate carbamoyltransferase;                                                                                                                                                     |
| N | Q4UWY7 | DE | Aspartate transcarbamylase;                                                                                                                                                         |
| N | Q4UWY7 | DR | 'de novo' pyrimidine base biosynthetic process                                                                                                                                      |
| N | Q4UWY7 | DR | amino acid binding                                                                                                                                                                  |
| N | Q4UWY7 | DR | aspartate carbamoyltransferase activity                                                                                                                                             |
| N | Q4UWY7 | DR | cellular amino acid metabolic process                                                                                                                                               |
| N | Q4UWY7 | DR | pyrimidine nucleotide biosynthetic process                                                                                                                                          |
| N | Q4UY06 | DE | ATP-sulfurylase small subunit;                                                                                                                                                      |
| N | Q4UY06 | DE | Sulfate adenylate transferase;                                                                                                                                                      |
| N | Q4UY06 | DE | Sulfate adenyltransferase subunit 2;                                                                                                                                                |
| N | Q4UY06 | DR | sulfate adenyltransferase (ATP) activity                                                                                                                                            |
| N | Q4UY06 | DR | sulfate reduction                                                                                                                                                                   |
| N | Q4V7C1 | CC | Required for anchoring microtubules to the centrosomes (By similarity).                                                                                                             |
| N | Q4V7C1 | DE | FGFR1 oncogene partner;                                                                                                                                                             |
| N | Q4V7C1 | DR | microtubule anchoring                                                                                                                                                               |
| N | Q4VYA5 | CC | Catalyzes the hydrolysis of 5-hydroxyisourate (HIU) to 2-oxo-4-hydroxy-4-carboxy-5-ureidoimidazole (OHCU).                                                                          |
| N | Q4VYA5 | DE | 5-hydroxyisourate hydrolase;                                                                                                                                                        |
| N | Q4VYA5 | DE | HIU hydrolase;                                                                                                                                                                      |
| N | Q4VYA5 | DE | Transthyretin-like protein;                                                                                                                                                         |
| N | Q4VYA5 | DE | Transthyretin-related protein;                                                                                                                                                      |
| N | Q4VYA5 | DR | hydroxyisourate hydrolase activity                                                                                                                                                  |
| N | Q4VYA5 | DR | purine base metabolic process                                                                                                                                                       |
| N | Q4WDD0 | CC | Involved in pre-mRNA splicing                                                                                                                                                       |
| N | Q4WDD0 | CC | May do so by stabilizing the catalytic center or the position of the RNA substrate (By similarity).                                                                                 |

|   |        |    |                                                                                                                                                                                                                                         |
|---|--------|----|-----------------------------------------------------------------------------------------------------------------------------------------------------------------------------------------------------------------------------------------|
| N | Q4WDD0 | CC | May function at or prior to the first catalytic step of splicing at the catalytic center of the spliceosome                                                                                                                             |
| N | Q4WDD0 | DE | Pre-mRNA-splicing factor cwc21;                                                                                                                                                                                                         |
| N | Q4WDD0 | DR | mRNA processing                                                                                                                                                                                                                         |
| N | Q4WDE0 | CC | Component of theERMES/MDM complex, which serves as a molecular tether to connect the endoplasmic reticulum and mitochondria                                                                                                             |
| N | Q4WDE0 | CC | Components of this complex are involved in the control of mitochondrial shape and protein biogenesis and may function in phospholipid exchange                                                                                          |
| N | Q4WDE0 | CC | Essential for establishing and maintaining the structure of mitochondria and maintenance of mtDNA nucleoids (By similarity).                                                                                                            |
| N | Q4WDE0 | CC | The mdm10-mdm12-mmm1 subcomplex further acts in the TOM40-specific pathway after the action of the mdm12-mmm1 complex                                                                                                                   |
| N | Q4WDE0 | CC | The mdm12-mmm1 subcomplex functions in the major beta-barrel assembly pathway that is responsible for biogenesis of all outer membrane beta-barrel proteins, and acts in a late step after the SAM complex                              |
| N | Q4WDE0 | DE | Maintenance of mitochondrial morphology protein 1;                                                                                                                                                                                      |
| N | Q4WEU2 | CC | DNA-dependent RNA polymerase catalyzes the transcription of DNA into RNA using the four ribonucleoside triphosphates as substrates                                                                                                      |
| N | Q4WEU2 | CC | Specific core component of RNA polymerase III which synthesizes small RNAs, such as 5S rRNA and tRNAs (By similarity).                                                                                                                  |
| N | Q4WEU2 | DE | DNA-directed RNA polymerase III subunit rpc3;                                                                                                                                                                                           |
| N | Q4WEU2 | DE | RNA polymerase III subunit C3;                                                                                                                                                                                                          |
| N | Q4WEU2 | DR | DNA-directed RNA polymerase activity                                                                                                                                                                                                    |
| N | Q4WKH9 | CC | DNA helicase which participates in several chromatin remodeling complexes, including the SWR1 and the INO80 complexes                                                                                                                   |
| N | Q4WKH9 | CC | Also involved in pre-rRNA processing (By similarity).                                                                                                                                                                                   |
| N | Q4WKH9 | CC | The INO80 complex remodels chromatin by shifting nucleosomes and is involved in DNA repair                                                                                                                                              |
| N | Q4WKH9 | CC | The SWR1 complex mediates the ATP-dependent exchange of histone H2A for the H2A variant HZT1 leading to transcriptional regulation of selected genes by chromatin remodeling                                                            |
| N | Q4WKH9 | DE | RuvB-like helicase 2;                                                                                                                                                                                                                   |
| N | Q4WKH9 | DR | DNA helicase activity                                                                                                                                                                                                                   |
| N | Q4WKH9 | DR | chromatin modification                                                                                                                                                                                                                  |
| N | Q4WKH9 | DR | rRNA processing                                                                                                                                                                                                                         |
| N | Q4WT68 | CC | May be involved in mitochondrial DNA stability (By similarity).                                                                                                                                                                         |
| N | Q4WT68 | DE | Mitochondrial outer membrane protein iml2;                                                                                                                                                                                              |
| N | Q4WXX5 | CC | Histone chaperone that facilitates histone deposition and histone exchange and removal during nucleosome assembly and disassembly (By similarity).                                                                                      |
| N | Q4WXX5 | DE | Anti-silencing function protein 1;                                                                                                                                                                                                      |
| N | Q4WXX5 | DE | Histone chaperone asf1;                                                                                                                                                                                                                 |
| N | Q4WXX5 | DR | chromatin assembly or disassembly                                                                                                                                                                                                       |
| N | Q4WXX5 | DR | chromatin modification                                                                                                                                                                                                                  |
| N | Q4X0I8 | CC | Has a role in mitochondrial fission                                                                                                                                                                                                     |
| N | Q4X0I8 | CC | Has a role in outer membrane fission but not matrix separation (By similarity).                                                                                                                                                         |
| N | Q4X0I8 | DE | Mitochondria fission 1 protein;                                                                                                                                                                                                         |
| N | Q4X2S8 | CC | Plays an important role in the salvage pathway for purine nucleotide biosynthesis                                                                                                                                                       |
| N | Q4X2S8 | CC | Catalyzes the first committed step in the biosynthesis of AMP from IMP (By similarity)                                                                                                                                                  |
| N | Q4X2S8 | DE | Adenylosuccinate synthetase;                                                                                                                                                                                                            |
| N | Q4X2S8 | DE | IMP--aspartate ligase;                                                                                                                                                                                                                  |
| N | Q4X2S8 | DR | adenylosuccinate synthase activity                                                                                                                                                                                                      |
| N | Q4X2S8 | DR | magnesium ion binding                                                                                                                                                                                                                   |
| N | Q4X2S8 | DR | purine nucleotide biosynthetic process                                                                                                                                                                                                  |
| N | Q4ZQ90 | DE | 3,4-dihydroxy-5-hexaprenylbenzoate methyltransferase;                                                                                                                                                                                   |
| N | Q4ZQ90 | DE | 3-demethylubiquinone-9 3-methyltransferase;                                                                                                                                                                                             |
| N | Q4ZQ90 | DE | DHHB methyltransferase;                                                                                                                                                                                                                 |
| N | Q4ZQ90 | DR | 2-polyprenyl-6-methoxy-1,4-benzoquinone methyltransferase activity                                                                                                                                                                      |
| N | Q4ZQ90 | DR | 3-demethylubiquinone-9 3-O-methyltransferase activity                                                                                                                                                                                   |
| N | Q4ZQ90 | DR | ubiquinone biosynthetic process                                                                                                                                                                                                         |
| N | Q4ZRI4 | CC | NDH-1 shuttles electrons from NADH, via FMN and iron- sulfur (Fe-S) centers, to quinones in the respiratory chain                                                                                                                       |
| N | Q4ZRI4 | CC | Couples the redox reaction to proton translocation (for every two electrons transferred, four hydrogen ions are translocated across the cytoplasmic membrane), and thus conserves the redox energy in a proton gradient (By similarity) |

|   |        |    |                                                                                                                                                                                                                                                                                                                                           |
|---|--------|----|-------------------------------------------------------------------------------------------------------------------------------------------------------------------------------------------------------------------------------------------------------------------------------------------------------------------------------------------|
| N | Q4ZRI4 | CC | The immediate electron acceptor for the enzyme in this species is believed to be ubiquinone                                                                                                                                                                                                                                               |
| N | Q4ZRI4 | DE | NADH dehydrogenase I subunit K;                                                                                                                                                                                                                                                                                                           |
| N | Q4ZRI4 | DE | NADH-quinone oxidoreductase subunit K;                                                                                                                                                                                                                                                                                                    |
| N | Q4ZRI4 | DE | NDH-1 subunit K;                                                                                                                                                                                                                                                                                                                          |
| N | Q4ZRI4 | DR | ATP synthesis coupled electron transport                                                                                                                                                                                                                                                                                                  |
| N | Q4ZRI4 | DR | NADH dehydrogenase (quinone) activity                                                                                                                                                                                                                                                                                                     |
| N | Q4ZRI4 | DR | quinone binding                                                                                                                                                                                                                                                                                                                           |
| N | Q4ZSF3 | CC | Part of the ABC transporter complex XylFGH involved in xylose import                                                                                                                                                                                                                                                                      |
| N | Q4ZSF3 | CC | Responsible for energy coupling to the transport system (By similarity).                                                                                                                                                                                                                                                                  |
| N | Q4ZSF3 | DE | Xylose import ATP-binding protein XylG;                                                                                                                                                                                                                                                                                                   |
| N | Q4ZSF3 | DR | D-xylose-importing ATPase activity                                                                                                                                                                                                                                                                                                        |
| N | Q4ZSF5 | DE | Xylose isomerase;                                                                                                                                                                                                                                                                                                                         |
| N | Q4ZSF5 | DR | D-xylose metabolic process                                                                                                                                                                                                                                                                                                                |
| N | Q4ZSF5 | DR | metal ion binding                                                                                                                                                                                                                                                                                                                         |
| N | Q4ZSF5 | DR | pentose-phosphate shunt                                                                                                                                                                                                                                                                                                                   |
| N | Q4ZSF5 | DR | xylose isomerase activity                                                                                                                                                                                                                                                                                                                 |
| N | Q4ZVL1 | CC | Endonuclease that specifically degrades the RNA of RNA- DNA hybrids (By similarity).                                                                                                                                                                                                                                                      |
| N | Q4ZVL1 | DE | Ribonuclease H;                                                                                                                                                                                                                                                                                                                           |
| N | Q4ZVL1 | DR | metal ion binding                                                                                                                                                                                                                                                                                                                         |
| N | Q4ZVL1 | DR | nucleic acid binding                                                                                                                                                                                                                                                                                                                      |
| N | Q4ZVL1 | DR | ribonuclease H activity                                                                                                                                                                                                                                                                                                                   |
| N | Q4ZWL3 | CC | Nuclease that resolves Holliday junction intermediates in genetic recombination Cleaves the cruciform structure in supercoiled DNA by nicking to strands with the same polarity at sites symmetrically opposed at the junction in the homologous arms and leaves a 5'-terminal phosphate and a 3'-terminal hydroxyl group (By similarity) |
| N | Q4ZWL3 | CC |                                                                                                                                                                                                                                                                                                                                           |
| N | Q4ZWL3 | DE | Crossover junction endodeoxyribonuclease ruvC;                                                                                                                                                                                                                                                                                            |
| N | Q4ZWL3 | DE | Holliday junction nuclease ruvC;                                                                                                                                                                                                                                                                                                          |
| N | Q4ZWL3 | DE | Holliday junction resolvase ruvC;                                                                                                                                                                                                                                                                                                         |
| N | Q4ZWL3 | DR | DNA recombination                                                                                                                                                                                                                                                                                                                         |
| N | Q4ZWL3 | DR | crossover junction endodeoxyribonuclease activity                                                                                                                                                                                                                                                                                         |
| N | Q4ZWL3 | DR | metal ion binding                                                                                                                                                                                                                                                                                                                         |
| N | Q4ZWL3 | DR | nucleic acid binding                                                                                                                                                                                                                                                                                                                      |
| N | Q4ZWV3 | CC | Forms oxaloacetate, a four-carbon dicarboxylic acid source for the tricarboxylic acid cycle.                                                                                                                                                                                                                                              |
| N | Q4ZWV3 | DE | Phosphoenolpyruvate carboxylase;                                                                                                                                                                                                                                                                                                          |
| N | Q4ZWV3 | DR | carbon fixation                                                                                                                                                                                                                                                                                                                           |
| N | Q4ZWV3 | DR | phosphoenolpyruvate carboxylase activity                                                                                                                                                                                                                                                                                                  |
| N | Q4ZWV3 | DR | tricarboxylic acid cycle                                                                                                                                                                                                                                                                                                                  |
| N | Q4ZX15 | CC | Catalyzes the decarboxylation of oxaloacetate into pyruvate                                                                                                                                                                                                                                                                               |
| N | Q4ZX15 | CC | Seems to play a role in maintaining cellular concentrations of bicarbonate and pyruvate (By similarity).                                                                                                                                                                                                                                  |
| N | Q4ZX15 | DE | Oxaloacetate decarboxylase;                                                                                                                                                                                                                                                                                                               |
| N | Q4ZX15 | DR | metal ion binding                                                                                                                                                                                                                                                                                                                         |
| N | Q4ZX15 | DR | oxaloacetate decarboxylase activity                                                                                                                                                                                                                                                                                                       |
| N | Q4ZZU5 | DE | Amino-acid acetyltransferase;                                                                                                                                                                                                                                                                                                             |
| N | Q4ZZU5 | DE | N-acetylglutamate synthase;                                                                                                                                                                                                                                                                                                               |
| N | Q4ZZU5 | DR | acetyl-CoA:L-glutamate N-acetyltransferase activity                                                                                                                                                                                                                                                                                       |
| N | Q4ZZU5 | DR | arginine biosynthetic process                                                                                                                                                                                                                                                                                                             |
| N | Q50192 | DE | Leucine--tRNA ligase;                                                                                                                                                                                                                                                                                                                     |
| N | Q50192 | DE | Leucyl-tRNA synthetase;                                                                                                                                                                                                                                                                                                                   |
| N | Q50192 | DR | leucine-tRNA ligase activity                                                                                                                                                                                                                                                                                                              |
| N | Q50192 | DR | leucyl-tRNA aminoacylation                                                                                                                                                                                                                                                                                                                |
| N | Q503I8 | CC | Specifically deglycosylates the denatured form of N- linked glycoproteins in the cytoplasm and assists their proteasome-mediated degradation                                                                                                                                                                                              |
| N | Q503I8 | CC | Can recognize misfolded proteins in the endoplasmic reticulum that are exported in the cytosol to be destroyed and deglycosylate them, while it has no activity toward native proteins                                                                                                                                                    |
| N | Q503I8 | CC | Cleaves the beta-aspartyl- glucosamine (GlcNAc) of the glycan and the amide side chain of Asn, converting Asn to Asp                                                                                                                                                                                                                      |
| N | Q503I8 | CC | Deglycosylation is prerequisite for subsequent proteasome-mediated degradation of some, but not all, misfolded glycoproteins (By similarity).                                                                                                                                                                                             |
| N | Q503I8 | CC | Prefers proteins containing high- mannose over those bearing complex type oligosaccharides                                                                                                                                                                                                                                                |

|   |        |    |                                                                                                                                                                                                                     |
|---|--------|----|---------------------------------------------------------------------------------------------------------------------------------------------------------------------------------------------------------------------|
| N | Q503I8 | DE | N-glycanase 1;                                                                                                                                                                                                      |
| N | Q503I8 | DE | Peptide-N(4)-(N-acetyl-beta-glucosaminy)asparagine amidase;                                                                                                                                                         |
| N | Q503I8 | DE | Peptide:N-glycanase;                                                                                                                                                                                                |
| N | Q503I8 | DR | glycoprotein catabolic process                                                                                                                                                                                      |
| N | Q503I8 | DR | metal ion binding                                                                                                                                                                                                   |
| N | Q503I8 | DR | peptide-N4-(N-acetyl-beta-glucosaminy)asparagine amidase activity                                                                                                                                                   |
| N | Q503R4 | CC | Probable substrate-specific adapter of an E3 ubiquitin- protein ligase complex which mediates the ubiquitination and subsequent proteasomal degradation of target proteins (By similarity).                         |
| N | Q503R4 | DE | Kelch-like protein 36;                                                                                                                                                                                              |
| N | Q503U1 | DE | LYR motif-containing protein 5A;                                                                                                                                                                                    |
| N | Q50400 | CC | Probable electron acceptor for methylamine dehydrogenase.                                                                                                                                                           |
| N | Q50400 | DR | copper ion binding                                                                                                                                                                                                  |
| N | Q50400 | DR | electron carrier activity                                                                                                                                                                                           |
| N | Q50400 | DR | electron transport chain                                                                                                                                                                                            |
| N | Q50KA9 | CC | Major role in the synthesis of nucleoside triphosphates other than ATP                                                                                                                                              |
| N | Q50KA9 | CC | Involved in cell proliferation, differentiation and development, signal transduction, G protein- coupled receptor endocytosis, and gene expression                                                                  |
| N | Q50KA9 | CC | Possesses nucleoside-diphosphate kinase, serine/threonine-specific protein kinase, geranyl and farnesyl pyrophosphate kinase, histidine protein kinase and 3'-5' exonuclease activities                             |
| N | Q50KA9 | CC | Required for neural development including neural patterning and cell fate determination (By similarity).                                                                                                            |
| N | Q50KA9 | CC | The ATP gamma phosphate is transferred to the NDP beta phosphate via a ping-pong mechanism, using a phosphorylated active-site intermediate                                                                         |
| N | Q50KA9 | DE | NDP kinase A;                                                                                                                                                                                                       |
| N | Q50KA9 | DE | Nucleoside diphosphate kinase A;                                                                                                                                                                                    |
| N | Q50KA9 | DR | CTP biosynthetic process                                                                                                                                                                                            |
| N | Q50KA9 | DR | GTP biosynthetic process                                                                                                                                                                                            |
| N | Q50KA9 | DR | UTP biosynthetic process                                                                                                                                                                                            |
| N | Q50KA9 | DR | cell differentiation                                                                                                                                                                                                |
| N | Q50KA9 | DR | nervous system development                                                                                                                                                                                          |
| N | Q50KA9 | DR | nucleoside diphosphate kinase activity                                                                                                                                                                              |
| N | Q51473 | CC | This protein is one of the two subunits of integration host factor, a specific DNA-binding protein that functions in genetic recombination as well as in transcriptional and translational control (By similarity). |
| N | Q51473 | DE | Integration host factor subunit beta;                                                                                                                                                                               |
| N | Q51473 | DR | DNA recombination                                                                                                                                                                                                   |
| N | Q51473 | DR | regulation of transcription, DNA-dependent                                                                                                                                                                          |
| N | Q51473 | DR | regulation of translation                                                                                                                                                                                           |
| N | Q52086 | CC | Catalyzes the hydrolytic dehalogenation of small (R)-2- haloalkanoic acids to yield the corresponding (S)-2- hydroxyalkanoic acids                                                                                  |
| N | Q52086 | CC | Acts on acids of short chain lengths, C(2) to C(4), with inversion of configuration at C-2                                                                                                                          |
| N | Q52086 | DE | (R)-2-haloacid dehalogenase;                                                                                                                                                                                        |
| N | Q52086 | DE | D-2-haloacid dehalogenase;                                                                                                                                                                                          |
| N | Q52086 | DR | (R)-2-haloacid dehalogenase activity                                                                                                                                                                                |
| N | Q52R90 | CC | Indispensable for the control of thyroid structure and metabolism (By similarity).                                                                                                                                  |
| N | Q52R90 | DE | Thyroid-stimulating hormone subunit beta;                                                                                                                                                                           |
| N | Q52R90 | DE | Thyrotropin beta chain;                                                                                                                                                                                             |
| N | Q52R90 | DE | Thyrotropin subunit beta;                                                                                                                                                                                           |
| N | Q52R90 | DR | hormone activity                                                                                                                                                                                                    |
| N | Q53120 | CC | This photoactive protein is a photoreceptor with kinetics similar to that of rhodopsin                                                                                                                              |
| N | Q53120 | DE | Photoactive yellow protein;                                                                                                                                                                                         |
| N | Q53120 | DR | photoreceptor activity                                                                                                                                                                                              |
| N | Q53120 | DR | phototransduction                                                                                                                                                                                                   |
| N | Q53120 | DR | protein-chromophore linkage                                                                                                                                                                                         |
| N | Q53120 | DR | regulation of transcription, DNA-dependent                                                                                                                                                                          |
| N | Q53B56 | CC | This three-finger toxin produces peripheral paralysis by blocking neuromuscular transmission at the postsynaptic site                                                                                               |
| N | Q53B56 | CC | Binds to muscular and neuronal (only alpha-7 alpha-8 alpha-9) nicotinic acetylcholine receptors (By similarity).                                                                                                    |
| N | Q53B56 | DE | Long neurotoxin OH-57;                                                                                                                                                                                              |
| N | Q53B56 | DR | acetylcholine receptor inhibitor activity                                                                                                                                                                           |
| N | Q53B56 | DR | synaptic transmission                                                                                                                                                                                               |
| N | Q53LU4 | CC | Lignin degradation and detoxification of lignin-derived products (By similarity).                                                                                                                                   |

|   |        |    |                                                                                                                                                                                                                                |
|---|--------|----|--------------------------------------------------------------------------------------------------------------------------------------------------------------------------------------------------------------------------------|
| N | Q53LU4 | DE | Benzenediol:oxygen oxidoreductase 18;                                                                                                                                                                                          |
| N | Q53LU4 | DE | Diphenol oxidase 18;                                                                                                                                                                                                           |
| N | Q53LU4 | DE | Urishiol oxidase 18;                                                                                                                                                                                                           |
| N | Q53LU4 | DR | copper ion binding                                                                                                                                                                                                             |
| N | Q53LU4 | DR | laccase activity                                                                                                                                                                                                               |
| N | Q53LU4 | DR | lignin catabolic process                                                                                                                                                                                                       |
| N | Q53LU4 | DR | oxidation-reduction process                                                                                                                                                                                                    |
| N | Q53RY4 | DE | Keratinocyte-associated protein 3;                                                                                                                                                                                             |
| N | Q54450 | CC | Can bind free heme and also acquire it from hemoglobin                                                                                                                                                                         |
| N | Q54450 | CC | Conveys heme from hemoglobin to the HasR receptor which releases it into the bacterium                                                                                                                                         |
| N | Q54450 | CC | HasR alone can take up heme but the synergy between HasA and HasR increases heme uptake 100-fold.                                                                                                                              |
| N | Q54450 | DE | Heme acquisition system protein A;                                                                                                                                                                                             |
| N | Q54450 | DE | Hemophore HasA;                                                                                                                                                                                                                |
| N | Q54450 | DR | metal ion binding                                                                                                                                                                                                              |
| N | Q54CB2 | CC | Probably mediates the nuclear export of actin and profilin-actin complexes (By similarity).                                                                                                                                    |
| N | Q54CB2 | DR | protein transport                                                                                                                                                                                                              |
| N | Q54CH1 | DE | Arrestin domain-containing protein A;                                                                                                                                                                                          |
| N | Q54CH1 | DR | signal transduction                                                                                                                                                                                                            |
| N | Q54CH1 | DR | zinc ion binding                                                                                                                                                                                                               |
| N | Q54DR7 | DE | Putative uncharacterized protein DDB_G0292176;                                                                                                                                                                                 |
| N | Q54DX7 | CC | Acyltransferase which mediates the conversion of 1-acyl- sn-glycero-3-phosphocholine (LPC) into phosphatidylcholine (PC)                                                                                                       |
| N | Q54DX7 | CC | Involved in the remodeling of the acyl groups of cardiolipin in the mitochondrial inner membrane, which affects the assembly and stability of respiratory chain complex IV and its supercomplex forms (By similarity).         |
| N | Q54DX7 | CC | Required for normal phospholipid content of mitochondrial membranes                                                                                                                                                            |
| N | Q54DX7 | DE | 1-acylglycerophosphocholine O-acyltransferase;                                                                                                                                                                                 |
| N | Q54DX7 | DE | Putative lysophosphatidylcholine acyltransferase;                                                                                                                                                                              |
| N | Q54DX7 | DE | Tafazzin homolog;                                                                                                                                                                                                              |
| N | Q54DX7 | DR | 1-acylglycerophosphocholine O-acyltransferase activity                                                                                                                                                                         |
| N | Q54IC9 | CC | May be involved in the degradation process of specific misfolded endoplasmic reticulum (ER) luminal proteins (By similarity).                                                                                                  |
| N | Q54IC9 | DE | Probable derlin-1 homolog;                                                                                                                                                                                                     |
| N | Q54IC9 | DR | response to unfolded protein                                                                                                                                                                                                   |
| N | Q54J77 | DE | Frizzled and smoothened-like protein F;                                                                                                                                                                                        |
| N | Q54JB3 | CC | Converts protoheme IX and farnesyl diphosphate to heme O (By similarity).                                                                                                                                                      |
| N | Q54JB3 | DE | Heme O synthase;                                                                                                                                                                                                               |
| N | Q54JB3 | DE | Probable protoheme IX farnesyltransferase, mitochondrial;                                                                                                                                                                      |
| N | Q54JB3 | DR | heme biosynthetic process                                                                                                                                                                                                      |
| N | Q54JB3 | DR | protoheme IX farnesyltransferase activity                                                                                                                                                                                      |
| N | Q54NK8 | DE | ATP-binding domain 1 family member C homolog;                                                                                                                                                                                  |
| N | Q54NK8 | DE | GPN-loop GTPase 3 homolog;                                                                                                                                                                                                     |
| N | Q54NZ4 | CC | Part of the AP-4 complex, an adaptor-related complex which might be implicated in vesicular transport between intracellular compartments appearing upon cell differentiation such as prespore vesicles (PSVs) (By similarity). |
| N | Q54NZ4 | DE | AP-4 adapter complex subunit sigma;                                                                                                                                                                                            |
| N | Q54NZ4 | DE | AP-4 complex subunit sigma;                                                                                                                                                                                                    |
| N | Q54NZ4 | DE | Adapter-related protein complex 4 subunit sigma;                                                                                                                                                                               |
| N | Q54NZ4 | DE | Sigma subunit of AP-4;                                                                                                                                                                                                         |
| N | Q54NZ4 | DE | Sigma4-adaptin;                                                                                                                                                                                                                |
| N | Q54NZ4 | DR | protein transporter activity                                                                                                                                                                                                   |
| N | Q54Q02 | DE | Putative uncharacterized protein DDB_G0284297;                                                                                                                                                                                 |
| N | Q54Q40 | CC | May be a zinc metalloprotease that specifically cleaves ubiquitin chains (By similarity).                                                                                                                                      |
| N | Q54Q40 | DE | Developmental gene 1039 protein;                                                                                                                                                                                               |
| N | Q54Q40 | DE | Probable ubiquitin thiolesterase DG1039;                                                                                                                                                                                       |
| N | Q54Q40 | DR | metal ion binding                                                                                                                                                                                                              |
| N | Q54Q40 | DR | metallopeptidase activity                                                                                                                                                                                                      |
| N | Q54Q92 | DE | LMBR1 domain-containing protein 2 homolog A;                                                                                                                                                                                   |
| N | Q54QS0 | CC | E3 UFM1-protein ligase that mediates ubiquitination of target proteins (By similarity).                                                                                                                                        |
| N | Q54QS0 | DE | E3 UFM1-protein ligase 1 homolog;                                                                                                                                                                                              |
| N | Q54QS0 | DR | ligase activity                                                                                                                                                                                                                |
| N | Q54QU3 | DE | Uncharacterized protein DDB_G0283639;                                                                                                                                                                                          |



|   |        |    |                                                                                                                                                                                                                                             |
|---|--------|----|---------------------------------------------------------------------------------------------------------------------------------------------------------------------------------------------------------------------------------------------|
| N | Q54SG3 | DE | Uncharacterized transmembrane protein DDB_G0282483;                                                                                                                                                                                         |
| N | Q54SR6 | DE | Putative uncharacterized protein DDB_G0282269;                                                                                                                                                                                              |
| N | Q54TF8 | CC | ATP-binding RNA helicase required for normal differentiation and development.                                                                                                                                                               |
| N | Q54TF8 | DE | ATP-dependent RNA helicase ddx19;                                                                                                                                                                                                           |
| N | Q54TF8 | DE | ATP-dependent RNA helicase helC;                                                                                                                                                                                                            |
| N | Q54TF8 | DE | DEAD box protein 19;                                                                                                                                                                                                                        |
| N | Q54TF8 | DR | ATP-dependent helicase activity                                                                                                                                                                                                             |
| N | Q54TF8 | DR | multicellular organismal development                                                                                                                                                                                                        |
| N | Q54VG1 | CC | Guanine nucleotide-binding proteins (G proteins) are involved as modulators or transducers in various transmembrane signaling systems.                                                                                                      |
| N | Q54VG1 | DE | G alpha-12;                                                                                                                                                                                                                                 |
| N | Q54VG1 | DE | Guanine nucleotide-binding protein alpha-12 subunit;                                                                                                                                                                                        |
| N | Q54VG1 | DR | G-protein coupled receptor protein signaling pathway                                                                                                                                                                                        |
| N | Q54VG1 | DR | signal transducer activity                                                                                                                                                                                                                  |
| N | Q54W16 | DE | UPF0406 protein;                                                                                                                                                                                                                            |
| N | Q54X53 | DE | 60S ribosomal protein L21;                                                                                                                                                                                                                  |
| N | Q54X53 | DR | response to bacterium                                                                                                                                                                                                                       |
| N | Q54X53 | DR | structural constituent of ribosome                                                                                                                                                                                                          |
| N | Q54XM0 | DE | Uncharacterized CDP-alcohol phosphatidyltransferase class-I family protein 2;                                                                                                                                                               |
| N | Q54XM0 | DR | phospholipid biosynthetic process                                                                                                                                                                                                           |
| N | Q54XM0 | DR | phosphotransferase activity, for other substituted phosphate groups                                                                                                                                                                         |
| N | Q54YB7 | DE | Myb-like protein F;                                                                                                                                                                                                                         |
| N | Q54ZS8 | CC | involved in the 5'-end formation of mRNA precursors (pre-mRNA) by the addition of a poly(A) tail of 200-250 nt to the upstream cleavage product (By similarity)                                                                             |
| N | Q54ZS8 | DE | Poly(A)-binding protein 2;                                                                                                                                                                                                                  |
| N | Q54ZS8 | DE | Poly(A)-binding protein II;                                                                                                                                                                                                                 |
| N | Q54ZS8 | DE | Polyadenylate-binding protein 2;                                                                                                                                                                                                            |
| N | Q54ZS8 | DR | mRNA polyadenylation                                                                                                                                                                                                                        |
| N | Q54ZS8 | DR | nucleotide binding                                                                                                                                                                                                                          |
| N | Q54ZS8 | DR | poly(A) RNA binding                                                                                                                                                                                                                         |
| N | Q55332 | CC | stabilizes the structure of photosystem II oxygen-evolving complex (OEC), the ion environment of oxygen evolution and protects the OEC against heat-induced inactivation                                                                    |
| N | Q55332 | CC | May modulate the Cl(-) requirement for oxygen evolution.                                                                                                                                                                                    |
| N | Q55332 | DE | PS II complex 12 kDa extrinsic protein;                                                                                                                                                                                                     |
| N | Q55332 | DE | Photosystem II 12 kDa extrinsic protein;                                                                                                                                                                                                    |
| N | Q55332 | DR | electron transport chain                                                                                                                                                                                                                    |
| N | Q55332 | DR | photosynthesis                                                                                                                                                                                                                              |
| N | Q55332 | DR | photosystem II stabilization                                                                                                                                                                                                                |
| N | Q559T8 | DE | Probable serine/threonine-protein kinase DDB_G0272282;                                                                                                                                                                                      |
| N | Q559T8 | DR | cell communication                                                                                                                                                                                                                          |
| N | Q559T8 | DR | phosphatidylinositol binding                                                                                                                                                                                                                |
| N | Q559T8 | DR | protein phosphorylation                                                                                                                                                                                                                     |
| N | Q559T8 | DR | protein serine/threonine kinase activity                                                                                                                                                                                                    |
| N | Q559W3 | DE | Uncharacterized protein DDB_G0272420;                                                                                                                                                                                                       |
| N | Q559W3 | DR | nucleic acid binding                                                                                                                                                                                                                        |
| N | Q559W3 | DR | zinc ion binding                                                                                                                                                                                                                            |
| N | Q55BZ5 | DE | Acid ceramidase-like protein A;                                                                                                                                                                                                             |
| N | Q55BZ5 | DE | Protein dcd1A;                                                                                                                                                                                                                              |
| N | Q55C57 | DE | Glycogen synthase kinase-like kinase A;                                                                                                                                                                                                     |
| N | Q55C57 | DE | Probable serine/threonine-protein kinase glkA;                                                                                                                                                                                              |
| N | Q55C57 | DR | protein phosphorylation                                                                                                                                                                                                                     |
| N | Q55C57 | DR | protein serine/threonine kinase activity                                                                                                                                                                                                    |
| N | Q55C57 | DR | protein tyrosine kinase activity                                                                                                                                                                                                            |
| N | Q55C57 | DR | tau-protein kinase activity                                                                                                                                                                                                                 |
| N | Q55E94 | CC | Mitochondrial GTPase that catalyzes the GTP-dependent ribosomal translocation step during translation elongation                                                                                                                            |
| N | Q55E94 | CC | Catalyzes the coordinated movement of the two tRNA molecules, the mRNA and conformational changes in the ribosome (By similarity).                                                                                                          |
| N | Q55E94 | CC | During this step, the ribosome changes from the pre-translocational (PRE) to the post-translocational (POST) state as the newly formed A- site-bound peptidyl-tRNA and P-site-bound deacylated tRNA move to the P and E sites, respectively |
| N | Q55E94 | DE | Elongation factor G 1, mitochondrial;                                                                                                                                                                                                       |
| N | Q55E94 | DE | Elongation factor G, mitochondrial;                                                                                                                                                                                                         |
| N | Q55E94 | DE | Elongation factor G1;                                                                                                                                                                                                                       |
| N | Q55E94 | DR | GTPase activity                                                                                                                                                                                                                             |

|   |        |    |                                                                                                                                                                                                                                            |
|---|--------|----|--------------------------------------------------------------------------------------------------------------------------------------------------------------------------------------------------------------------------------------------|
| N | Q55E94 | DR | translation elongation factor activity                                                                                                                                                                                                     |
| N | Q55EF8 | DE | Transmembrane protein DDB_G0269096;                                                                                                                                                                                                        |
| N | Q55FF3 | CC | Conjugation of reduced glutathione to a wide number of exogenous and endogenous hydrophobic electrophiles (By similarity).                                                                                                                 |
| N | Q55FF3 | DE | GST class-alpha 1;                                                                                                                                                                                                                         |
| N | Q55FF3 | DE | Putative glutathione S-transferase alpha-1;                                                                                                                                                                                                |
| N | Q55FF3 | DR | glutathione transferase activity                                                                                                                                                                                                           |
| N | Q56214 | CC | The ruvA-ruvB complex in the presence of ATP renatures cruciform structure in supercoiled DNA with palindromic sequence, indicating that it may promote strand exchange reactions in homologous recombination                              |
| N | Q56214 | CC | It can promote Holliday junction migration alone.                                                                                                                                                                                          |
| N | Q56214 | CC | RuvAB is an helicase that mediates the Holliday junction migration by localized denaturation and reannealing                                                                                                                               |
| N | Q56214 | CC | RuvB is a Mg(2+)-dependent, DNA-dependent ATPase with an equal preference for supercoiled and linear duplex DNA                                                                                                                            |
| N | Q56214 | DE | Holliday junction ATP-dependent DNA helicase ruvB;                                                                                                                                                                                         |
| N | Q56214 | DR | DNA recombination                                                                                                                                                                                                                          |
| N | Q56214 | DR | four-way junction helicase activity                                                                                                                                                                                                        |
| N | Q56316 | DE | Pyruvate oxidoreductase delta chain;                                                                                                                                                                                                       |
| N | Q56316 | DE | Pyruvate synthase subunit porD;                                                                                                                                                                                                            |
| N | Q56316 | DE | Pyruvic-ferredoxin oxidoreductase subunit delta;                                                                                                                                                                                           |
| N | Q56316 | DR | 4 iron, 4 sulfur cluster binding                                                                                                                                                                                                           |
| N | Q56316 | DR | electron carrier activity                                                                                                                                                                                                                  |
| N | Q56316 | DR | electron transport chain                                                                                                                                                                                                                   |
| N | Q56316 | DR | metal ion binding                                                                                                                                                                                                                          |
| N | Q56316 | DR | oxidoreductase activity, acting on the aldehyde or oxo group of donors, iron-sulfur protein as acceptor                                                                                                                                    |
| N | Q56425 | CC | Required for maturation of 30S ribosomal subunits (By similarity).                                                                                                                                                                         |
| N | Q56425 | DE | Ribosome maturation factor rimP;                                                                                                                                                                                                           |
| N | Q56425 | DR | ribosome biogenesis                                                                                                                                                                                                                        |
| N | Q56694 | CC | Catalyzes the oxidation of long-chain aliphatic aldehydes to acids                                                                                                                                                                         |
| N | Q56694 | CC | May be implicated in controlling luminescence as it catalyzes the oxidation of the fatty aldehyde substrate for the light-emitting reaction.                                                                                               |
| N | Q56694 | DE | NADP-dependent fatty aldehyde dehydrogenase;                                                                                                                                                                                               |
| N | Q56694 | DR | aldehyde dehydrogenase (NADP+) activity                                                                                                                                                                                                    |
| N | Q56694 | DR | oxidation-reduction process                                                                                                                                                                                                                |
| N | Q56715 | CC | This protein binds to the 23S rRNA, and is important in its secondary structure                                                                                                                                                            |
| N | Q56715 | CC | It is located near the subunit interface in the base of the L7/L12 stalk, and near the tRNA binding site of the peptidyltransferase center (By similarity).                                                                                |
| N | Q56715 | DE | 50S ribosomal protein L6;                                                                                                                                                                                                                  |
| N | Q57624 | CC | Allows the formation of correctly charged Asn-tRNA(Asn) or Gln-tRNA(Gln) through the transamidation of misacylated Asp- tRNA(Asn) or Glu-tRNA(Gln) in organisms which lack either or both of asparaginyl-tRNA or glutaminytRNA synthetases |
| N | Q57624 | CC | The reaction takes place in the presence of glutamine and ATP through an activated phospho-Asp-tRNA(Asn) or phospho-Glu-tRNA(Gln) (By similarity).                                                                                         |
| N | Q57624 | DE | Asp/Glu-ADT subunit B;                                                                                                                                                                                                                     |
| N | Q57624 | DE | Aspartyl/glutamyl-tRNA(Asn/Gln) amidotransferase subunit B;                                                                                                                                                                                |
| N | Q57624 | DR | carbon-nitrogen ligase activity, with glutamine as amido-N-donor                                                                                                                                                                           |
| N | Q57673 | CC | Produces ATP from ADP in the presence of a proton gradient across the membrane                                                                                                                                                             |
| N | Q57673 | DE | V-ATPase subunit E;                                                                                                                                                                                                                        |
| N | Q57673 | DE | V-type ATP synthase subunit E;                                                                                                                                                                                                             |
| N | Q57673 | DR | ATP biosynthetic process                                                                                                                                                                                                                   |
| N | Q57673 | DR | ATP hydrolysis coupled proton transport                                                                                                                                                                                                    |
| N | Q57673 | DR | proton-transporting ATPase activity, rotational mechanism                                                                                                                                                                                  |
| N | Q57727 | CC | Prenyltransferase that catalyzes the transfer of the geranylgeranyl moiety of geranylgeranyl diphosphate (GGPP) to the C2 hydroxyl of (S)-3-O-geranylgeranylglyceryl phosphate (GGGP)                                                      |
| N | Q57727 | CC | This reaction is the second ether-bond-formation step in the biosynthesis of archaeal membrane lipids (By similarity).                                                                                                                     |
| N | Q57727 | DE | (S)-2,3-di-O-geranylgeranylglyceryl phosphate synthase;                                                                                                                                                                                    |
| N | Q57727 | DE | DGGGP synthase;                                                                                                                                                                                                                            |
| N | Q57727 | DE | Digeranylgeranylglyceryl phosphate synthase;                                                                                                                                                                                               |
| N | Q57727 | DE | Geranylgeranylglycerol-phosphate geranylgeranyltransferase;                                                                                                                                                                                |
| N | Q57727 | DR | geranylgeranylglycerol-phosphate geranylgeranyltransferase activity                                                                                                                                                                        |
| N | Q57727 | DR | magnesium ion binding                                                                                                                                                                                                                      |

|   |        |    |                                                                                                                                                                                                          |
|---|--------|----|----------------------------------------------------------------------------------------------------------------------------------------------------------------------------------------------------------|
| N | Q57727 | DR | phospholipid biosynthetic process                                                                                                                                                                        |
| N | Q57727 | DR | prenyltransferase activity                                                                                                                                                                               |
| N | Q57842 | DE | Probable phosphomannomutase;                                                                                                                                                                             |
| N | Q57842 | DR | carbohydrate metabolic process                                                                                                                                                                           |
| N | Q57842 | DR | magnesium ion binding                                                                                                                                                                                    |
| N | Q57842 | DR | phosphomannomutase activity                                                                                                                                                                              |
| N | Q57866 | DE | Uncharacterized ATP-binding protein MJ0423;                                                                                                                                                              |
| N | Q57889 | DE | Uncharacterized protein MJ0447;                                                                                                                                                                          |
| N | Q57950 | DE | Uncharacterized ZPR1-like protein MJ0530;                                                                                                                                                                |
| N | Q57950 | DR | zinc ion binding                                                                                                                                                                                         |
| N | Q57C89 | CC | DNA ligase that catalyzes the formation of phosphodiester linkages between 5'-phosphoryl and 3'-hydroxyl groups in double-stranded DNA using NAD as a coenzyme and as the energy source for the reaction |
| N | Q57C89 | CC | It is essential for DNA replication and repair of damaged DNA (By similarity).                                                                                                                           |
| N | Q57C89 | DE | Polydeoxyribonucleotide synthase [NAD+];                                                                                                                                                                 |
| N | Q57C89 | DR | DNA ligase (NAD+) activity                                                                                                                                                                               |
| N | Q57C89 | DR | DNA replication                                                                                                                                                                                          |
| N | Q57C89 | DR | metal ion binding                                                                                                                                                                                        |
| N | Q57CZ9 | DE | Anthranilate phosphoribosyltransferase;                                                                                                                                                                  |
| N | Q57CZ9 | DR | anthranilate phosphoribosyltransferase activity                                                                                                                                                          |
| N | Q57CZ9 | DR | tryptophan biosynthetic process                                                                                                                                                                          |
| N | Q57D97 | DE | UPF0283 membrane protein BruAb1_1038;                                                                                                                                                                    |
| N | Q57DG3 | CC | Together with moaC, is involved in the conversion of a guanosine derivative (5'-GTP) into molybdopterin precursor Z (By similarity).                                                                     |
| N | Q57DG3 | DE | Molybdenum cofactor biosynthesis protein A;                                                                                                                                                              |
| N | Q57DG3 | DR | 4 iron, 4 sulfur cluster binding                                                                                                                                                                         |
| N | Q57DG3 | DR | Mo-molybdopterin cofactor biosynthetic process                                                                                                                                                           |
| N | Q57DG3 | DR | catalytic activity                                                                                                                                                                                       |
| N | Q57DG3 | DR | metal ion binding                                                                                                                                                                                        |
| N | Q57DZ4 | CC | May conjugate Arg from its aminoacyl-tRNA to the N- termini of proteins containing an N-terminal aspartate or glutamate (Potential).                                                                     |
| N | Q57DZ4 | DE | Arginyltransferase;                                                                                                                                                                                      |
| N | Q57DZ4 | DE | Putative arginyl-tRNA--protein transferase;                                                                                                                                                              |
| N | Q57DZ4 | DE | R-transferase;                                                                                                                                                                                           |
| N | Q57DZ4 | DR | acyltransferase activity                                                                                                                                                                                 |
| N | Q57DZ4 | DR | arginyltransferase activity                                                                                                                                                                              |
| N | Q57DZ4 | DR | protein arginylation                                                                                                                                                                                     |
| N | Q57F30 | CC | Catalyzes the condensation of pantoate with beta-alanine in an ATP-dependent reaction via a pantoyl-adenylate intermediate (By similarity).                                                              |
| N | Q57F30 | DE | Pantoate--beta-alanine ligase;                                                                                                                                                                           |
| N | Q57F30 | DE | Pantoate-activating enzyme;                                                                                                                                                                              |
| N | Q57F30 | DE | Pantothenate synthetase;                                                                                                                                                                                 |
| N | Q57F30 | DR | pantoate-beta-alanine ligase activity                                                                                                                                                                    |
| N | Q57F30 | DR | pantothenate biosynthetic process                                                                                                                                                                        |
| N | Q57HF3 | DE | 6-phosphofructokinase;                                                                                                                                                                                   |
| N | Q57HF3 | DE | Phosphofructokinase;                                                                                                                                                                                     |
| N | Q57HF3 | DE | Phosphohexokinase;                                                                                                                                                                                       |
| N | Q57HF3 | DR | 6-phosphofructokinase activity                                                                                                                                                                           |
| N | Q57HF3 | DR | fructose 6-phosphate metabolic process                                                                                                                                                                   |
| N | Q57HF3 | DR | metal ion binding                                                                                                                                                                                        |
| N | Q57IG5 | DE | Glycine--tRNA ligase alpha subunit;                                                                                                                                                                      |
| N | Q57IG5 | DE | Glycyl-tRNA synthetase alpha subunit;                                                                                                                                                                    |
| N | Q57IG5 | DR | glycine-tRNA ligase activity                                                                                                                                                                             |
| N | Q57IG5 | DR | glycyl-tRNA aminoacylation                                                                                                                                                                               |
| N | Q57L18 | CC | Binds specifically to the ssrA RNA (tmRNA) and is required for stable association of ssrA with ribosomes (By similarity).                                                                                |
| N | Q57L18 | DE | SsrA-binding protein;                                                                                                                                                                                    |
| N | Q58004 | DE | UPF0718 protein MJ0584;                                                                                                                                                                                  |
| N | Q58059 | DE | Uncharacterized protein MJ0642;                                                                                                                                                                          |
| N | Q58059 | DR | high-affinity iron ion transport                                                                                                                                                                         |
| N | Q58059 | DR | iron ion transmembrane transporter activity                                                                                                                                                              |
| N | Q58112 | DE | Uncharacterized protein MJ0701;                                                                                                                                                                          |
| N | Q58112 | DR | DNA primase activity                                                                                                                                                                                     |
| N | Q58112 | DR | DNA replication, synthesis of RNA primer                                                                                                                                                                 |
| N | Q58217 | DE | Uncharacterized protein MJ0807;                                                                                                                                                                          |

|   |        |    |                                                                                                                                                                                                                                      |
|---|--------|----|--------------------------------------------------------------------------------------------------------------------------------------------------------------------------------------------------------------------------------------|
| N | Q58217 | DR | lyase activity                                                                                                                                                                                                                       |
| N | Q58299 | DE | Uncharacterized protein MJ0889;                                                                                                                                                                                                      |
| N | Q58342 | CC | Binds and compact DNA (95 to 150 base pairs) to form nucleosome-like structures that contain positive DNA supercoils                                                                                                                 |
| N | Q58342 | CC | Increases the resistance of DNA to thermal denaturation (By similarity).                                                                                                                                                             |
| N | Q58342 | DE | Probable archaeal histone 2;                                                                                                                                                                                                         |
| N | Q58342 | DR | sequence-specific DNA binding                                                                                                                                                                                                        |
| N | Q58606 | CC | This methylase recognizes the double-stranded sequence CCGG, causes specific methylation on C-? on both strands, and protects the DNA from cleavage by the MjaVI endonuclease (Potential).                                           |
| N | Q58606 | DE | Modification methylase MjaVI;                                                                                                                                                                                                        |
| N | Q58606 | DE | N-4 cytosine-specific methyltransferase MjaVI;                                                                                                                                                                                       |
| N | Q58606 | DR | DNA restriction-modification system                                                                                                                                                                                                  |
| N | Q58606 | DR | N-methyltransferase activity                                                                                                                                                                                                         |
| N | Q58606 | DR | site-specific DNA-methyltransferase (cytosine-N4-specific) activity                                                                                                                                                                  |
| N | Q58610 | DE | Uncharacterized protein MJ1213;                                                                                                                                                                                                      |
| N | Q58933 | CC | Specifically phosphorylates seryl-tRNA(Sec) to O- phosphoseryl-tRNA(Sec), an activated intermediate for selenocysteine biosynthesis.                                                                                                 |
| N | Q58933 | DE | L-seryl-tRNA(Sec) kinase;                                                                                                                                                                                                            |
| N | Q58933 | DE | O-phosphoseryl-tRNA(Sec) kinase;                                                                                                                                                                                                     |
| N | Q58933 | DR | kinase activity                                                                                                                                                                                                                      |
| N | Q58933 | DR | phosphotransferase activity, alcohol group as acceptor                                                                                                                                                                               |
| N | Q589R5 | DE | Triose-phosphate isomerase;                                                                                                                                                                                                          |
| N | Q589R5 | DE | Triosephosphate isomerase;                                                                                                                                                                                                           |
| N | Q589R5 | DR | fatty acid biosynthetic process                                                                                                                                                                                                      |
| N | Q589R5 | DR | gluconeogenesis                                                                                                                                                                                                                      |
| N | Q589R5 | DR | pentose-phosphate shunt                                                                                                                                                                                                              |
| N | Q589R5 | DR | triose-phosphate isomerase activity                                                                                                                                                                                                  |
| N | Q58FF8 | CC | Molecular chaperone                                                                                                                                                                                                                  |
| N | Q58FF8 | CC | Has ATPase activity (By similarity).                                                                                                                                                                                                 |
| N | Q58FF8 | DE | Heat shock protein 90-beta b;                                                                                                                                                                                                        |
| N | Q58FF8 | DE | Heat shock protein 90Bb;                                                                                                                                                                                                             |
| N | Q58FF8 | DE | Putative heat shock protein HSP 90-beta 2;                                                                                                                                                                                           |
| N | Q58FF8 | DR | protein folding                                                                                                                                                                                                                      |
| N | Q58FF8 | DR | response to stress                                                                                                                                                                                                                   |
| N | Q58FF8 | DR | unfolded protein binding                                                                                                                                                                                                             |
| N | Q59024 | CC | Possesses two activities: a DNA synthesis (polymerase) and an exonucleolytic activity that degrades single stranded DNA in the 3'- to 5'-direction                                                                                   |
| N | Q59024 | CC | Has a template-primer preference which is characteristic of a replicative DNA polymerase.                                                                                                                                            |
| N | Q59024 | DE | DNA polymerase II large subunit;                                                                                                                                                                                                     |
| N | Q59024 | DR | DNA catabolic process                                                                                                                                                                                                                |
| N | Q59024 | DR | DNA replication                                                                                                                                                                                                                      |
| N | Q59024 | DR | DNA-directed DNA polymerase activity                                                                                                                                                                                                 |
| N | Q59024 | DR | exonuclease activity                                                                                                                                                                                                                 |
| N | Q591M6 | CC | Core subunit of the mitochondrial membrane respiratory chain NADH dehydrogenase (Complex I) that is believed to belong to the minimal assembly complex for catalysis in the transfer of electrons from NADH to the respiratory chain |
| N | Q591M6 | CC | The immediate electron acceptor for the enzyme is believed to be ubiquinone (By similarity).                                                                                                                                         |
| N | Q591M6 | DE | NADH dehydrogenase subunit 4L;                                                                                                                                                                                                       |
| N | Q591M6 | DE | NADH-ubiquinone oxidoreductase chain 4L;                                                                                                                                                                                             |
| N | Q591M6 | DR | ATP synthesis coupled electron transport                                                                                                                                                                                             |
| N | Q591M6 | DR | NADH dehydrogenase (ubiquinone) activity                                                                                                                                                                                             |
| N | Q59284 | DE | SDAP desuccinylase;                                                                                                                                                                                                                  |
| N | Q59284 | DE | Succinyl-diaminopimelate desuccinylase;                                                                                                                                                                                              |
| N | Q59284 | DR | diaminopimelate biosynthetic process                                                                                                                                                                                                 |
| N | Q59284 | DR | metal ion binding                                                                                                                                                                                                                    |
| N | Q59284 | DR | metallopeptidase activity                                                                                                                                                                                                            |
| N | Q59284 | DR | succinyl-diaminopimelate desuccinylase activity                                                                                                                                                                                      |
| N | Q59334 | CC | Catalyzes an early step in the biosynthesis of tetrapyrroles                                                                                                                                                                         |
| N | Q59334 | CC | Binds two molecules of 5-aminolevulinate per subunit, each at a distinct site, and catalyzes their condensation to form porphobilinogen.                                                                                             |
| N | Q59334 | DE | Delta-aminolevulinic acid dehydratase;                                                                                                                                                                                               |
| N | Q59334 | DE | Porphobilinogen synthase;                                                                                                                                                                                                            |

|   |        |    |                                                                                                                                                                                                                    |
|---|--------|----|--------------------------------------------------------------------------------------------------------------------------------------------------------------------------------------------------------------------|
| N | Q59334 | DR | heme biosynthetic process                                                                                                                                                                                          |
| N | Q59334 | DR | metal ion binding                                                                                                                                                                                                  |
| N | Q59334 | DR | porphobilinogen synthase activity                                                                                                                                                                                  |
| N | Q59478 | CC | Degrades alginates that contain guluronic acid.                                                                                                                                                                    |
| N | Q59478 | DE | Alginate lyase;                                                                                                                                                                                                    |
| N | Q59478 | DE | Poly(beta-D-mannuronate) lyase;                                                                                                                                                                                    |
| N | Q59478 | DE | Poly(mana) alginate lyase;                                                                                                                                                                                         |
| N | Q59478 | DR | poly(beta-D-mannuronate) lyase activity                                                                                                                                                                            |
| N | Q59K14 | CC | DNA helicase component of the INO80 complex which remodels chromatin by shifting nucleosomes and is involved in DNA repair (By similarity).                                                                        |
| N | Q59K14 | DE | Putative DNA helicase INO80;                                                                                                                                                                                       |
| N | Q59K14 | DR | chromatin modification                                                                                                                                                                                             |
| N | Q59K14 | DR | helicase activity                                                                                                                                                                                                  |
| N | Q59ZB1 | DE | Adenosine aminohydrolase;                                                                                                                                                                                          |
| N | Q59ZB1 | DE | Adenosine deaminase;                                                                                                                                                                                               |
| N | Q59ZB1 | DR | adenosine deaminase activity                                                                                                                                                                                       |
| N | Q59ZB1 | DR | metal ion binding                                                                                                                                                                                                  |
| N | Q59ZB1 | DR | purine ribonucleoside monophosphate biosynthetic process                                                                                                                                                           |
| N | Q5B0C0 | CC | Involved in osmoadaptation.                                                                                                                                                                                        |
| N | Q5B0C0 | DE | Heat shock 70 kDa protein;                                                                                                                                                                                         |
| N | Q5B0C0 | DR | protein folding                                                                                                                                                                                                    |
| N | Q5B0C0 | DR | response to stress                                                                                                                                                                                                 |
| N | Q5B0C0 | DR | unfolded protein binding                                                                                                                                                                                           |
| N | Q5B3X3 | CC | Component of the coenzyme Q biosynthetic pathway                                                                                                                                                                   |
| N | Q5B3X3 | CC | May play a role in organizing a multi-subunit COQ enzyme complex required for coenzyme Q biosynthesis                                                                                                              |
| N | Q5B3X3 | CC | Required for steady-state levels of other COQ polypeptides (By similarity).                                                                                                                                        |
| N | Q5B3X3 | DE | Coenzyme Q biosynthesis protein 4;                                                                                                                                                                                 |
| N | Q5B3X3 | DE | Ubiquinone biosynthesis protein coq4, mitochondrial;                                                                                                                                                               |
| N | Q5B3X3 | DR | ubiquinone biosynthetic process                                                                                                                                                                                    |
| N | Q5B538 | CC | Required for the post-translational delivery of tail- anchored (TA) proteins to the endoplasmic reticulum                                                                                                          |
| N | Q5B538 | CC | Acts as a membrane receptor for soluble get3, which recognizes and selectively binds the transmembrane domain of TA proteins in the cytosol (By similarity).                                                       |
| N | Q5B538 | DE | Guided entry of tail-anchored proteins 1;                                                                                                                                                                          |
| N | Q5B538 | DE | Protein get1;                                                                                                                                                                                                      |
| N | Q5B8X0 | CC | Catalyzes the formation of N(1)-methylguanine at position 9 (m1G9) in cytoplasmic tRNAs (By similarity).                                                                                                           |
| N | Q5B8X0 | DE | tRNA (guanine-N(1)-)-methyltransferase;                                                                                                                                                                            |
| N | Q5B8X0 | DE | tRNA methyltransferase 10;                                                                                                                                                                                         |
| N | Q5B8X0 | DR | tRNA (guanine-N1-)-methyltransferase activity                                                                                                                                                                      |
| N | Q5BCU8 | CC | Serine/threonine protein kinase probably involved in the cytoplasm to vacuole transport (Cvt) and in autophagy, where it may be required for the formation of autophagosomes (By similarity).                      |
| N | Q5BCU8 | DE | Autophagy-related protein 1;                                                                                                                                                                                       |
| N | Q5BCU8 | DE | Serine/threonine-protein kinase atg1;                                                                                                                                                                              |
| N | Q5BCU8 | DR | protein phosphorylation                                                                                                                                                                                            |
| N | Q5BCU8 | DR | protein serine/threonine kinase activity                                                                                                                                                                           |
| N | Q5BCU8 | DR | protein transport                                                                                                                                                                                                  |
| N | Q5BKF8 | CC | Transcriptional regulator which participates in regulating the pre-mRNA splicing process (By similarity).                                                                                                          |
| N | Q5BS23 | DE | Uncharacterized protein SJCHGC06711;                                                                                                                                                                               |
| N | Q5DTT8 | DE | Paraneoplastic antigen-like protein 5;                                                                                                                                                                             |
| N | Q5E2C7 | CC | Catalyzes the transfer of a dimethylallyl group onto the adenine at position 37 in tRNAs that read codons beginning with uridine, leading to the formation of N6-(dimethylallyl)adenosine (i(6)A) (By similarity). |
| N | Q5E2C7 | DE | DMAPP:tRNA dimethylallyltransferase;                                                                                                                                                                               |
| N | Q5E2C7 | DE | Dimethylallyl diphosphate:tRNA dimethylallyltransferase;                                                                                                                                                           |
| N | Q5E2C7 | DE | IPP transferase;                                                                                                                                                                                                   |
| N | Q5E2C7 | DE | Isopentenyl-diphosphate:tRNA isopentenyltransferase;                                                                                                                                                               |
| N | Q5E2C7 | DE | tRNA dimethylallyltransferase;                                                                                                                                                                                     |
| N | Q5E2C7 | DR | tRNA dimethylallyltransferase activity                                                                                                                                                                             |
| N | Q5E2C7 | DR | tRNA processing                                                                                                                                                                                                    |
| N | Q5E491 | DE | UPF0260 protein VF_1660;                                                                                                                                                                                           |

|   |        |    |                                                                                                                                                                                                                                                  |
|---|--------|----|--------------------------------------------------------------------------------------------------------------------------------------------------------------------------------------------------------------------------------------------------|
| N | Q5E4P6 | CC | Specifically methylates the cytosine at position 1962 (m5C1962) of 23S rRNA (By similarity).                                                                                                                                                     |
| N | Q5E4P6 | DE | 23S rRNA m5C1962 methyltransferase;                                                                                                                                                                                                              |
| N | Q5E4P6 | DE | Ribosomal RNA large subunit methyltransferase I;                                                                                                                                                                                                 |
| N | Q5E4P6 | DE | rRNA (cytosine-C(5)-)-methyltransferase RlmI;                                                                                                                                                                                                    |
| N | Q5E4P6 | DR | rRNA methyltransferase activity                                                                                                                                                                                                                  |
| N | Q5E839 | CC | Reduction of activated sulfate into sulfite.                                                                                                                                                                                                     |
| N | Q5E839 | DE | 3'-phosphoadenylylsulfate reductase;                                                                                                                                                                                                             |
| N | Q5E839 | DE | PAPS reductase, thioredoxin dependent;                                                                                                                                                                                                           |
| N | Q5E839 | DE | PAPS sulfotransferase;                                                                                                                                                                                                                           |
| N | Q5E839 | DE | PAdoPS reductase;                                                                                                                                                                                                                                |
| N | Q5E839 | DE | Phosphoadenosine phosphosulfate reductase;                                                                                                                                                                                                       |
| N | Q5E839 | DR | cysteine biosynthetic process                                                                                                                                                                                                                    |
| N | Q5E839 | DR | phosphoadenylyl-sulfate reductase (thioredoxin) activity                                                                                                                                                                                         |
| N | Q5E839 | DR | sulfate assimilation, phosphoadenylyl sulfate reduction by phosphoadenylyl-sulfate reductase (thioredoxin)                                                                                                                                       |
| N | Q5E887 | DE | D-fructose-1,6-bisphosphate 1-phosphohydrolase class 1;                                                                                                                                                                                          |
| N | Q5E887 | DE | FBPase class 1;                                                                                                                                                                                                                                  |
| N | Q5E887 | DE | Fructose-1,6-bisphosphatase class 1;                                                                                                                                                                                                             |
| N | Q5E887 | DR | carbohydrate metabolic process                                                                                                                                                                                                                   |
| N | Q5E887 | DR | fructose 1,6-bisphosphate 1-phosphatase activity                                                                                                                                                                                                 |
| N | Q5E887 | DR | metal ion binding                                                                                                                                                                                                                                |
| N | Q5E9C8 | CC | May be involved in the binding and intracellular trafficking of cobalamin (vitamin B12) (By similarity).                                                                                                                                         |
| N | Q5E9C8 | DE | Methylmalonic aciduria and homocystinuria type C protein homolog;                                                                                                                                                                                |
| N | Q5E9C8 | DR | cobalamin binding                                                                                                                                                                                                                                |
| N | Q5E9Z9 | CC | Seems to be involved in cell adhesion through trans- homophilic and - heterophilic interactions, the latter including specifically interactions with PVRL2/nectin-1 (By similarity).                                                             |
| N | Q5E9Z9 | DE | Poliovirus receptor-related protein 4;                                                                                                                                                                                                           |
| N | Q5E9Z9 | DR | cell adhesion                                                                                                                                                                                                                                    |
| N | Q5EFR1 | CC | Suppresses the host immune response through NF-kappa-B inactivation                                                                                                                                                                              |
| N | Q5EFR1 | CC | Possesses ankyrin repeat domains required for NF- kappa-B binding but lacks the regulatory regions required for dissociation from NF-kappa-B and degradation thereof, prevents host NF-kappa-B release and subsequent activation (By similarity) |
| N | Q5EFR1 | CC | I-Kappa-B like protein I1;                                                                                                                                                                                                                       |
| N | Q5EFR1 | DE | I-Kappa-B like protein I1;                                                                                                                                                                                                                       |
| N | Q5EFR1 | DR | interspecies interaction between organisms                                                                                                                                                                                                       |
| N | Q5F5C2 | CC | Condenses 4-methyl-5-(beta-hydroxyethyl)thiazole monophosphate (THZ-P) and 2-methyl-4-amino-5-hydroxymethyl pyrimidine pyrophosphate (HMP-PP) to form thiamine monophosphate (TMP) (By similarity).                                              |
| N | Q5F5C2 | DE | TMP pyrophosphorylase;                                                                                                                                                                                                                           |
| N | Q5F5C2 | DE | Thiamine-phosphate pyrophosphorylase;                                                                                                                                                                                                            |
| N | Q5F5C2 | DE | Thiamine-phosphate synthase;                                                                                                                                                                                                                     |
| N | Q5F5C2 | DR | metal ion binding                                                                                                                                                                                                                                |
| N | Q5F5C2 | DR | thiamine biosynthetic process                                                                                                                                                                                                                    |
| N | Q5F5C2 | DR | thiamine-phosphate diphosphorylase activity                                                                                                                                                                                                      |
| N | Q5F7V9 | CC | Nucleotidase that shows phosphatase activity on nucleoside 5'-monophosphates (By similarity).                                                                                                                                                    |
| N | Q5F7V9 | DE | 5'-nucleotidase surE;                                                                                                                                                                                                                            |
| N | Q5F7V9 | DE | Nucleoside 5'-monophosphate phosphohydrolase;                                                                                                                                                                                                    |
| N | Q5F7V9 | DR | 5'-nucleotidase activity                                                                                                                                                                                                                         |
| N | Q5F7V9 | DR | metal ion binding                                                                                                                                                                                                                                |
| N | Q5F7V9 | DR | nucleotide binding                                                                                                                                                                                                                               |
| N | Q5FAC7 | CC | Cell wall formation                                                                                                                                                                                                                              |
| N | Q5FAC7 | CC | Essential for cell wall synthesis.                                                                                                                                                                                                               |
| N | Q5FAC7 | CC | Synthesis of cross-linked peptidoglycan from the lipid intermediates                                                                                                                                                                             |
| N | Q5FAC7 | CC | The enzyme has a penicillin-insensitive transglycosylase N-terminal domain (formation of linear glycan strands) and a penicillin-sensitive transpeptidase C-terminal domain (cross-linking of the peptide subunits) (By similarity)              |
| N | Q5FAC7 | DE | DD-transpeptidase;                                                                                                                                                                                                                               |
| N | Q5FAC7 | DE | Penicillin-binding protein 1A;                                                                                                                                                                                                                   |
| N | Q5FAC7 | DE | Penicillin-insensitive transglycosylase;                                                                                                                                                                                                         |
| N | Q5FAC7 | DE | Penicillin-sensitive transpeptidase;                                                                                                                                                                                                             |
| N | Q5FAC7 | DE | Peptidoglycan TGase;                                                                                                                                                                                                                             |
| N | Q5FAC7 | DR | cellular cell wall organization                                                                                                                                                                                                                  |

|   |        |    |                                                                                                                                                                                                                                                                              |
|---|--------|----|------------------------------------------------------------------------------------------------------------------------------------------------------------------------------------------------------------------------------------------------------------------------------|
| N | Q5FAC7 | DR | penicillin binding                                                                                                                                                                                                                                                           |
| N | Q5FAC7 | DR | peptidase activity                                                                                                                                                                                                                                                           |
| N | Q5FAC7 | DR | peptidoglycan biosynthetic process                                                                                                                                                                                                                                           |
| N | Q5FAC7 | DR | regulation of cell shape                                                                                                                                                                                                                                                     |
| N | Q5FAC7 | DR | response to antibiotic                                                                                                                                                                                                                                                       |
| N | Q5FAC7 | DR | transferase activity, transferring pentosyl groups                                                                                                                                                                                                                           |
| N | Q5FB95 | DE | ERGIC53-like protein;                                                                                                                                                                                                                                                        |
| N | Q5FB95 | DE | LMAN1-like protein;                                                                                                                                                                                                                                                          |
| N | Q5FB95 | DE | Lectin mannose-binding 1-like;                                                                                                                                                                                                                                               |
| N | Q5FB95 | DE | Protein ERGIC-53-like;                                                                                                                                                                                                                                                       |
| N | Q5FB95 | DE | Sublingual acinar membrane protein;                                                                                                                                                                                                                                          |
| N | Q5FB95 | DR | sugar binding                                                                                                                                                                                                                                                                |
| N | Q5FG20 | CC | DNA ligase that catalyzes the formation of phosphodiester linkages between 5'-phosphoryl and 3'-hydroxyl groups in double-stranded DNA using NAD as a coenzyme and as the energy source for the reaction                                                                     |
| N | Q5FG20 | CC | It is essential for DNA replication and repair of damaged DNA (By similarity).                                                                                                                                                                                               |
| N | Q5FG20 | DE | Polydeoxyribonucleotide synthase [NAD+];                                                                                                                                                                                                                                     |
| N | Q5FG20 | DR | DNA ligase (NAD+) activity                                                                                                                                                                                                                                                   |
| N | Q5FG20 | DR | DNA replication                                                                                                                                                                                                                                                              |
| N | Q5FG20 | DR | metal ion binding                                                                                                                                                                                                                                                            |
| N | Q5FGQ8 | CC | Participates actively in the response to hyperosmotic and heat shock by preventing the aggregation of stress-denatured proteins and by disaggregating proteins, also in an autonomous, dnaK-independent fashion                                                              |
| N | Q5FGQ8 | CC | Also involved, together with dnaK and grpE, in the DNA replication of plasmids through activation of initiation proteins (By similarity).                                                                                                                                    |
| N | Q5FGQ8 | CC | GrpE releases ADP from dnaK; ATP binding to dnaK triggers the release of the substrate protein, thus completing the reaction cycle                                                                                                                                           |
| N | Q5FGQ8 | CC | Several rounds of ATP-dependent interactions between dnaJ, dnaK and grpE are required for fully efficient folding                                                                                                                                                            |
| N | Q5FGQ8 | CC | Unfolded proteins bind mutually to dnaJ; upon interaction with the dnaJ-bound protein, dnaK hydrolyzes its bound ATP, resulting in the formation of a stable complex                                                                                                         |
| N | Q5FGQ8 | DE | Chaperone protein dnaJ;                                                                                                                                                                                                                                                      |
| N | Q5FGQ8 | DR | DNA replication                                                                                                                                                                                                                                                              |
| N | Q5FGQ8 | DR | heat shock protein binding                                                                                                                                                                                                                                                   |
| N | Q5FGQ8 | DR | metal ion binding                                                                                                                                                                                                                                                            |
| N | Q5FGQ8 | DR | protein folding                                                                                                                                                                                                                                                              |
| N | Q5FGQ8 | DR | response to heat                                                                                                                                                                                                                                                             |
| N | Q5FGQ8 | DR | unfolded protein binding                                                                                                                                                                                                                                                     |
| N | Q5FKD1 | DE | Protein CrcB homolog 2;                                                                                                                                                                                                                                                      |
| N | Q5FNS2 | CC | Catalyzes the complicated ring closure reaction between the two acyclic compounds 1-deoxy-D-xylulose-5-phosphate (DXP) and 3-amino-2-oxopropyl phosphate (1-amino-acetone-3-phosphate or AAP) to form pyridoxine 5'-phosphate (PNP) and inorganic phosphate (By similarity). |
| N | Q5FNS2 | DE | PNP synthase;                                                                                                                                                                                                                                                                |
| N | Q5FNS2 | DE | Pyridoxine 5'-phosphate synthase;                                                                                                                                                                                                                                            |
| N | Q5FNS2 | DR | pyridoxine 5'-phosphate synthase activity                                                                                                                                                                                                                                    |
| N | Q5FNS2 | DR | pyridoxine biosynthetic process                                                                                                                                                                                                                                              |
| N | Q5FNY6 | CC | Produces ATP from ADP in the presence of a proton gradient across the membrane                                                                                                                                                                                               |
| N | Q5FNY6 | CC | The alpha chain is a regulatory subunit (By similarity).                                                                                                                                                                                                                     |
| N | Q5FNY6 | DE | ATP synthase F1 sector subunit alpha 2;                                                                                                                                                                                                                                      |
| N | Q5FNY6 | DE | ATP synthase subunit alpha 2;                                                                                                                                                                                                                                                |
| N | Q5FNY6 | DE | F-ATPase subunit alpha 2;                                                                                                                                                                                                                                                    |
| N | Q5FNY6 | DR | ATP hydrolysis coupled proton transport                                                                                                                                                                                                                                      |
| N | Q5FNY6 | DR | ATP synthesis coupled proton transport                                                                                                                                                                                                                                       |
| N | Q5FNY6 | DR | hydrogen ion transporting ATP synthase activity, rotational mechanism                                                                                                                                                                                                        |
| N | Q5FNY6 | DR | proton-transporting ATPase activity, rotational mechanism                                                                                                                                                                                                                    |
| N | Q5FUJ7 | CC | Cell wall formation                                                                                                                                                                                                                                                          |
| N | Q5FUJ7 | CC | Catalyzes the addition of glutamate to the nucleotide precursor UDP-N-acetylmuramoyl-L-alanine (UMA) (By similarity).                                                                                                                                                        |
| N | Q5FUJ7 | DE | D-glutamic acid-adding enzyme;                                                                                                                                                                                                                                               |
| N | Q5FUJ7 | DE | UDP-N-acetylmuramoyl-L-alanyl-D-glutamate synthetase;                                                                                                                                                                                                                        |
| N | Q5FUJ7 | DE | UDP-N-acetylmuramoylalanine--D-glutamate ligase;                                                                                                                                                                                                                             |
| N | Q5FUJ7 | DR | UDP-N-acetylmuramoylalanine-D-glutamate ligase activity                                                                                                                                                                                                                      |
| N | Q5FUJ7 | DR | cell division                                                                                                                                                                                                                                                                |
| N | Q5FUJ7 | DR | cellular cell wall organization                                                                                                                                                                                                                                              |

|   |        |    |                                                                                                                                                                                                                                                                |
|---|--------|----|----------------------------------------------------------------------------------------------------------------------------------------------------------------------------------------------------------------------------------------------------------------|
| N | Q5FUJ7 | DR | peptidoglycan biosynthetic process                                                                                                                                                                                                                             |
| N | Q5FUJ7 | DR | regulation of cell shape                                                                                                                                                                                                                                       |
| N | Q5FWT5 | DE | Glutamyl-tRNA synthase-like protein 1;                                                                                                                                                                                                                         |
| N | Q5FWT5 | DE | Glutamyl-tRNA(Gln) amidotransferase subunit A homolog;                                                                                                                                                                                                         |
| N | Q5FWT5 | DR | carbon-nitrogen ligase activity, with glutamine as amido-N-donor                                                                                                                                                                                               |
| N | Q5GC92 | CC | Maximin-S1 has no antimicrobial activity                                                                                                                                                                                                                       |
| N | Q5GC92 | CC | Maximin-S3 has an activity against mycoplasma but has no activity against common Gram-positive and Gram-negative bacteria nor fungi                                                                                                                            |
| N | Q5GC92 | CC | Maximin-S5 has an activity against mycoplasma but has no activity against common Gram-positive and Gram-negative bacteria nor fungi                                                                                                                            |
| N | Q5GC92 | CC | Has no hemolytic activity (By similarity).                                                                                                                                                                                                                     |
| N | Q5GC92 | CC | Has no hemolytic activity.                                                                                                                                                                                                                                     |
| N | Q5GC92 | DE | Maximin-S1;                                                                                                                                                                                                                                                    |
| N | Q5GC92 | DE | Maximin-S2;                                                                                                                                                                                                                                                    |
| N | Q5GC92 | DE | Maximin-S3;                                                                                                                                                                                                                                                    |
| N | Q5GC92 | DE | Maximin-S4;                                                                                                                                                                                                                                                    |
| N | Q5GC92 | DE | Maximin-S5;                                                                                                                                                                                                                                                    |
| N | Q5GC92 | DE | Maximins-S type B/C;                                                                                                                                                                                                                                           |
| N | Q5GC92 | DR | defense response to bacterium                                                                                                                                                                                                                                  |
| N | Q5GWT3 | CC | One of the primary rRNA binding proteins, it binds directly near the 3'-end of the 23S rRNA, where it nucleates assembly of the 50S subunit (By similarity).                                                                                                   |
| N | Q5GWT3 | DE | 50S ribosomal protein L3;                                                                                                                                                                                                                                      |
| N | Q5GWT3 | DR | structural constituent of ribosome                                                                                                                                                                                                                             |
| N | Q5H2R3 | CC | Catalyzes the attachment of glutamate to tRNA(Glu) in a two-step reaction: glutamate is first activated by ATP to form Glu-AMP and then transferred to the acceptor end of tRNA(Glu) (By similarity).                                                          |
| N | Q5H2R3 | DE | Glutamate--tRNA ligase;                                                                                                                                                                                                                                        |
| N | Q5H2R3 | DE | Glutamyl-tRNA synthetase;                                                                                                                                                                                                                                      |
| N | Q5H2R3 | DR | glutamate-tRNA ligase activity                                                                                                                                                                                                                                 |
| N | Q5H2R3 | DR | glutamyl-tRNA aminoacylation                                                                                                                                                                                                                                   |
| N | Q5H4J1 | DE | Maf-like protein XO00876;                                                                                                                                                                                                                                      |
| N | Q5H6Q3 | CC | Catalyzes the formation of the alpha-1,6-glycosidic linkages in glycogen by scission of a 1,4-alpha-linked oligosaccharide from growing alpha-1,4-glucan chains and the subsequent attachment of the oligosaccharide to the alpha-1,6 position (By similarity) |
| N | Q5H6Q3 | DE | 1,4-alpha-D-glucan:1,4-alpha-D-glucan 6-glucosyl-transferase 2;                                                                                                                                                                                                |
| N | Q5H6Q3 | DE | 1,4-alpha-glucan-branching enzyme 2;                                                                                                                                                                                                                           |
| N | Q5H6Q3 | DE | Glycogen-branching enzyme 2;                                                                                                                                                                                                                                   |
| N | Q5H6Q3 | DR | 1,4-alpha-glucan branching enzyme activity                                                                                                                                                                                                                     |
| N | Q5H6Q3 | DR | cation binding                                                                                                                                                                                                                                                 |
| N | Q5H6Q3 | DR | glycogen biosynthetic process                                                                                                                                                                                                                                  |
| N | Q5H6Q3 | DR | hydrolase activity, hydrolyzing O-glycosyl compounds                                                                                                                                                                                                           |
| N | Q5H9J7 | DE | Brain-expressed X-linked protein 5;                                                                                                                                                                                                                            |
| N | Q5H9J7 | DE | NGFRAP1-like protein 1;                                                                                                                                                                                                                                        |
| N | Q5H9J7 | DE | Nerve growth factor receptor-associated protein 2;                                                                                                                                                                                                             |
| N | Q5H9J7 | DE | Protein BEX5;                                                                                                                                                                                                                                                  |
| N | Q5HAN4 | CC | NAD-binding protein involved in the addition of a carboxymethylaminomethyl (cmnm) group at the wobble position (U34) of certain tRNAs, forming tRNA-cmnm(5)s(2)U34 (By similarity).                                                                            |
| N | Q5HAN4 | DE | Glucose-inhibited division protein A;                                                                                                                                                                                                                          |
| N | Q5HAN4 | DE | tRNA uridine 5-carboxymethylaminomethyl modification enzyme MnmG;                                                                                                                                                                                              |
| N | Q5HAN4 | DR | flavin adenine dinucleotide binding                                                                                                                                                                                                                            |
| N | Q5HAN4 | DR | tRNA wobble uridine modification                                                                                                                                                                                                                               |
| N | Q5HBC6 | CC | Specifically dimethylates two adjacent adenosines (A1518 and A1519) in the loop of a conserved hairpin near the 3'-end of 16S rRNA in the 30S particle                                                                                                         |
| N | Q5HBC6 | CC | May play a critical role in biogenesis of 30S subunits (By similarity).                                                                                                                                                                                        |
| N | Q5HBC6 | DE | 16S rRNA (adenine(1518)-N(6)/adenine(1519)-N(6))-dimethyltransferase;                                                                                                                                                                                          |
| N | Q5HBC6 | DE | 16S rRNA dimethyladenosine transferase;                                                                                                                                                                                                                        |
| N | Q5HBC6 | DE | 16S rRNA dimethylase;                                                                                                                                                                                                                                          |
| N | Q5HBC6 | DE | Ribosomal RNA small subunit methyltransferase A;                                                                                                                                                                                                               |
| N | Q5HBC6 | DE | S-adenosylmethionine-6-N', N'-adenosyl(rRNA) dimethyltransferase;                                                                                                                                                                                              |
| N | Q5HBC6 | DR | rRNA (adenine-N6,N6-)-dimethyltransferase activity                                                                                                                                                                                                             |
| N | Q5HCL3 | CC | Probably part of an ABC transporter complex                                                                                                                                                                                                                    |
| N | Q5HCL3 | CC | Responsible for energy coupling to the transport system (By similarity).                                                                                                                                                                                       |
| N | Q5HCL3 | DE | Putative ABC transporter ATP-binding protein SACOL2708;                                                                                                                                                                                                        |
| N | Q5HCL3 | DR | ATPase activity                                                                                                                                                                                                                                                |



|   |        |    |                                                                                                                                                                                                               |
|---|--------|----|---------------------------------------------------------------------------------------------------------------------------------------------------------------------------------------------------------------|
| N | Q5HCL3 | DR | hydrolase activity, acting on acid anhydrides, catalyzing transmembrane movement of substances                                                                                                                |
| N | Q5HDD1 | CC | Transforms pimelate into pimeloyl-CoA (By similarity).                                                                                                                                                        |
| N | Q5HDD1 | DE | 6-carboxyhexanoate--CoA ligase;                                                                                                                                                                               |
| N | Q5HDD1 | DE | Pimeloyl-CoA synthase;                                                                                                                                                                                        |
| N | Q5HDD1 | DR | 6-carboxyhexanoate-CoA ligase activity                                                                                                                                                                        |
| N | Q5HDD1 | DR | biotin biosynthetic process                                                                                                                                                                                   |
| N | Q5HF34 | CC | Cell wall formation (By similarity).                                                                                                                                                                          |
| N | Q5HF34 | DE | UDP-N-acetylmuramate--L-alanine ligase;                                                                                                                                                                       |
| N | Q5HF34 | DE | UDP-N-acetylmuramoyl-L-alanine synthetase;                                                                                                                                                                    |
| N | Q5HF34 | DR | UDP-N-acetylmuramate-L-alanine ligase activity                                                                                                                                                                |
| N | Q5HF34 | DR | cell division                                                                                                                                                                                                 |
| N | Q5HF34 | DR | cellular cell wall organization                                                                                                                                                                               |
| N | Q5HF34 | DR | peptidoglycan biosynthetic process                                                                                                                                                                            |
| N | Q5HF34 | DR | regulation of cell shape                                                                                                                                                                                      |
| N | Q5HFM1 | CC | Catalyzes the specific phosphorylation of the 3-hydroxyl group of shikimic acid using ATP as a cosubstrate (By similarity).                                                                                   |
| N | Q5HFM1 | DE | Shikimate kinase;                                                                                                                                                                                             |
| N | Q5HFM1 | DR | aromatic amino acid family biosynthetic process                                                                                                                                                               |
| N | Q5HFM1 | DR | metal ion binding                                                                                                                                                                                             |
| N | Q5HFM1 | DR | shikimate kinase activity                                                                                                                                                                                     |
| N | Q5HKN9 | DE | Imidazoleglycerol-phosphate dehydratase;                                                                                                                                                                      |
| N | Q5HKN9 | DR | histidine biosynthetic process                                                                                                                                                                                |
| N | Q5HKN9 | DR | imidazoleglycerol-phosphate dehydratase activity                                                                                                                                                              |
| N | Q5HLW3 | DE | Urea amidohydrolase subunit gamma;                                                                                                                                                                            |
| N | Q5HLW3 | DE | Urease subunit gamma;                                                                                                                                                                                         |
| N | Q5HLW3 | DR | nickel ion binding                                                                                                                                                                                            |
| N | Q5HLW3 | DR | urea metabolic process                                                                                                                                                                                        |
| N | Q5HLW3 | DR | urease activity                                                                                                                                                                                               |
| N | Q5HMG7 | CC | Required for the formation of a threonylcarbamoyl group on adenosine at position 37 (t(6)A37) in tRNAs that read codons beginning with adenine (By similarity).                                               |
| N | Q5HMG7 | CC | Critical mediator involved in the modification of cell wall peptidoglycan synthesis and/or cell division                                                                                                      |
| N | Q5HMG7 | CC | Essential for cell viability (By similarity).                                                                                                                                                                 |
| N | Q5HMG7 | DE | Probable tRNA threonylcarbamoyladenosine biosynthesis protein Gcp;                                                                                                                                            |
| N | Q5HMG7 | DE | t(6)A37 threonylcarbamoyladenosine biosynthesis protein;                                                                                                                                                      |
| N | Q5HMG7 | DR | metal ion binding                                                                                                                                                                                             |
| N | Q5HMG7 | DR | metalloendopeptidase activity                                                                                                                                                                                 |
| N | Q5HNR0 | CC | The ruvA-ruvB complex in the presence of ATP renatures cruciform structure in supercoiled DNA with palindromic sequence, indicating that it may promote strand exchange reactions in homologous recombination |
| N | Q5HNR0 | CC | RuvAB is an helicase that mediates the Holliday junction migration by localized denaturation and reannealing (By similarity).                                                                                 |
| N | Q5HNR0 | DE | Holliday junction ATP-dependent DNA helicase ruvB;                                                                                                                                                            |
| N | Q5HNR0 | DR | DNA recombination                                                                                                                                                                                             |
| N | Q5HNR0 | DR | four-way junction helicase activity                                                                                                                                                                           |
| N | Q5HNW1 | CC | Binds directly to 16S ribosomal RNA (By similarity).                                                                                                                                                          |
| N | Q5HNW1 | DE | 30S ribosomal protein S20;                                                                                                                                                                                    |
| N | Q5HNW1 | DR | structural constituent of ribosome                                                                                                                                                                            |
| N | Q5HPK8 | CC | Decomposes hydrogen peroxide into water and oxygen; serves to protect cells from the toxic effects of hydrogen peroxide (By similarity).                                                                      |
| N | Q5HPK8 | DR | catalase activity                                                                                                                                                                                             |
| N | Q5HPK8 | DR | hydrogen peroxide catabolic process                                                                                                                                                                           |
| N | Q5HPK8 | DR | oxidation-reduction process                                                                                                                                                                                   |
| N | Q5HPL2 | CC | Catalyzes the ATP-dependent phosphorylation of L- homoserine to L- homoserine phosphate (By similarity).                                                                                                      |
| N | Q5HPL2 | DE | Homoserine kinase;                                                                                                                                                                                            |
| N | Q5HPL2 | DR | homoserine kinase activity                                                                                                                                                                                    |
| N | Q5HPL2 | DR | threonine biosynthetic process                                                                                                                                                                                |
| N | Q5HQ78 | CC | Removes the formyl group from the N-terminal Met of newly synthesized proteins                                                                                                                                |
| N | Q5HQ78 | CC | N-terminal L-methionine is a prerequisite for activity but the enzyme has broad specificity at other positions (By similarity).                                                                               |
| N | Q5HQ78 | CC | Requires at least a dipeptide for an efficient rate of reaction                                                                                                                                               |
| N | Q5HQ78 | DE | Peptide deformylase;                                                                                                                                                                                          |
| N | Q5HQ78 | DE | Polypeptide deformylase;                                                                                                                                                                                      |

|   |        |    |                                                                                                                                                                                                                                                                       |
|---|--------|----|-----------------------------------------------------------------------------------------------------------------------------------------------------------------------------------------------------------------------------------------------------------------------|
| N | Q5HQ78 | DR | iron ion binding                                                                                                                                                                                                                                                      |
| N | Q5HQ78 | DR | peptide deformylase activity                                                                                                                                                                                                                                          |
| N | Q5HQG8 | DE | UPF0413 protein SERP0581;                                                                                                                                                                                                                                             |
| N | Q5HZL1 | DE | ERI1 exoribonuclease 2;                                                                                                                                                                                                                                               |
| N | Q5HZL1 | DE | Exonuclease domain-containing protein 1;                                                                                                                                                                                                                              |
| N | Q5HZL1 | DR | exonuclease activity                                                                                                                                                                                                                                                  |
| N | Q5HZL1 | DR | nucleic acid binding                                                                                                                                                                                                                                                  |
| N | Q5HZL1 | DR | zinc ion binding                                                                                                                                                                                                                                                      |
| N | Q5I6M2 | CC | Mitogen-activated protein kinase involved in a signal transduction pathway that is activated by changes in the osmolarity of the extracellular environment                                                                                                            |
| N | Q5I6M2 | CC | Controls osmotic regulation of transcription of target genes (By similarity).                                                                                                                                                                                         |
| N | Q5I6M2 | DE | MAP kinase HOG1;                                                                                                                                                                                                                                                      |
| N | Q5I6M2 | DE | MAP kinase STK1;                                                                                                                                                                                                                                                      |
| N | Q5I6M2 | DE | Mitogen-activated protein kinase HOG1;                                                                                                                                                                                                                                |
| N | Q5I6M2 | DR | MAP kinase activity                                                                                                                                                                                                                                                   |
| N | Q5I6M2 | DR | protein phosphorylation                                                                                                                                                                                                                                               |
| N | Q5J3Q5 | CC | Probable transcription factor (By similarity).                                                                                                                                                                                                                        |
| N | Q5J3Q5 | DE | Forkhead box protein E1;                                                                                                                                                                                                                                              |
| N | Q5J3Q5 | DR | regulation of transcription, DNA-dependent                                                                                                                                                                                                                            |
| N | Q5J3Q5 | DR | sequence-specific DNA binding                                                                                                                                                                                                                                         |
| N | Q5J3Q5 | DR | sequence-specific DNA binding transcription factor activity                                                                                                                                                                                                           |
| N | Q5JH81 | CC | relaxes both positive and negative supercoils and exhibits a strong decatenase activity.                                                                                                                                                                              |
| N | Q5JH81 | CC | The B subunit binds ATP (By similarity).                                                                                                                                                                                                                              |
| N | Q5JH81 | DE | Type 2 DNA topoisomerase 6 subunit B;                                                                                                                                                                                                                                 |
| N | Q5JH81 | DE | Type II DNA topoisomerase VI subunit B;                                                                                                                                                                                                                               |
| N | Q5JH81 | DR | DNA topoisomerase (ATP-hydrolyzing) activity                                                                                                                                                                                                                          |
| N | Q5JH81 | DR | DNA topological change                                                                                                                                                                                                                                                |
| N | Q5JG3  | CC | One of the primary rRNA binding proteins, it binds directly to 16S rRNA central domain where it helps coordinate assembly of the platform of the 30S subunit (By similarity).                                                                                         |
| N | Q5JG3  | DE | 30S ribosomal protein S8P;                                                                                                                                                                                                                                            |
| N | Q5JG3  | DR | structural constituent of ribosome                                                                                                                                                                                                                                    |
| N | Q5JPB2 | DE | Zinc finger protein 831;                                                                                                                                                                                                                                              |
| N | Q5JPB2 | DR | nucleic acid binding                                                                                                                                                                                                                                                  |
| N | Q5JPB2 | DR | zinc ion binding                                                                                                                                                                                                                                                      |
| N | Q5K654 | CC | Involved in pre-mRNA splicing and cell cycle progression                                                                                                                                                                                                              |
| N | Q5K654 | CC | Required for the spliceosome assembly and initiation of the DNA replication (By similarity).                                                                                                                                                                          |
| N | Q5K654 | DE | Pre-mRNA-splicing factor CLF1;                                                                                                                                                                                                                                        |
| N | Q5K654 | DR | mRNA processing                                                                                                                                                                                                                                                       |
| N | Q5KB85 | CC | Component of the cytosolic Fe/S protein assembly machinery                                                                                                                                                                                                            |
| N | Q5KB85 | CC | May play a role in the transfer of pre-assembled Fe/S clusters to target apoproteins (By similarity).                                                                                                                                                                 |
| N | Q5KB85 | CC | Required for maturation of extramitochondrial Fe/S proteins                                                                                                                                                                                                           |
| N | Q5KB85 | DE | Cytosolic Fe-S cluster assembly factor NAR1;                                                                                                                                                                                                                          |
| N | Q5KB85 | DE | Nuclear architecture-related protein 1;                                                                                                                                                                                                                               |
| N | Q5KB85 | DR | 4 iron, 4 sulfur cluster binding                                                                                                                                                                                                                                      |
| N | Q5KB85 | DR | iron-sulfur cluster assembly                                                                                                                                                                                                                                          |
| N | Q5KB85 | DR | metal ion binding                                                                                                                                                                                                                                                     |
| N | Q5KFI6 | CC | involved in the import of GDP-mannose from the cytoplasm into the Golgi lumen                                                                                                                                                                                         |
| N | Q5KFI6 | CC | Involved in capsule synthesis.                                                                                                                                                                                                                                        |
| N | Q5KFI6 | DE | GDP-mannose transporter 1;                                                                                                                                                                                                                                            |
| N | Q5KFI6 | DR | nucleotide-sugar transmembrane transporter activity                                                                                                                                                                                                                   |
| N | Q5KN36 | CC | ATP-binding RNA helicase involved in translation initiation                                                                                                                                                                                                           |
| N | Q5KN36 | CC | Remodels RNA in response to ADP and ATP concentrations by facilitating disruption, but also formation of RNA duplexes (By similarity).                                                                                                                                |
| N | Q5KN36 | DE | ATP-dependent RNA helicase ded1;                                                                                                                                                                                                                                      |
| N | Q5KN36 | DR | ATP-dependent helicase activity                                                                                                                                                                                                                                       |
| N | Q5KN36 | DR | translation initiation factor activity                                                                                                                                                                                                                                |
| N | Q5KVM7 | CC | Catalyzes the radical-mediated insertion of two sulfur atoms into the C-6 and C-8 positions of the octanoyl moiety bound to the lipoyl domains of lipoate-dependent enzymes, thereby converting the octanoylated domains into lipoylated derivatives (By similarity). |
| N | Q5KVM7 | DE | Lipoate synthase;                                                                                                                                                                                                                                                     |
| N | Q5KVM7 | DE | Lipoic acid synthase;                                                                                                                                                                                                                                                 |
| N | Q5KVM7 | DE | Lipoyl synthase;                                                                                                                                                                                                                                                      |

|   |        |    |                                                                                                                                                                                                                  |
|---|--------|----|------------------------------------------------------------------------------------------------------------------------------------------------------------------------------------------------------------------|
| N | Q5KVM7 | DE | Sulfur insertion protein lipA;                                                                                                                                                                                   |
| N | Q5KVM7 | DR | 4 iron, 4 sulfur cluster binding                                                                                                                                                                                 |
| N | Q5KVM7 | DR | lipoate biosynthetic process                                                                                                                                                                                     |
| N | Q5KVM7 | DR | lipoate synthase activity                                                                                                                                                                                        |
| N | Q5KVM7 | DR | metal ion binding                                                                                                                                                                                                |
| N | Q5KWR3 | CC | Transfers and isomerizes the ribose moiety from AdoMet to the 7-aminomethyl group of 7-deazaguanine (preQ1-tRNA) to give epoxyqueuosine (oQ-tRNA) (By similarity).                                               |
| N | Q5KWR3 | DE | Queuosine biosynthesis protein queA;                                                                                                                                                                             |
| N | Q5KWR3 | DE | S-adenosylmethionine:tRNA ribosyltransferase-isomerase;                                                                                                                                                          |
| N | Q5KWR3 | DR | isomerase activity                                                                                                                                                                                               |
| N | Q5KWR3 | DR | queuosine biosynthetic process                                                                                                                                                                                   |
| N | Q5KWR3 | DR | transferase activity                                                                                                                                                                                             |
| N | Q5L407 | CC | Seems to be the binding site for several of the factors involved in protein synthesis and appears to be essential for accurate translation (By similarity).                                                      |
| N | Q5L407 | DE | 50S ribosomal protein L7/L12;                                                                                                                                                                                    |
| N | Q5L407 | DR | structural constituent of ribosome                                                                                                                                                                               |
| N | Q5L4W6 | CC | ATP-dependent specificity component of the Clp protease                                                                                                                                                          |
| N | Q5L4W6 | CC | Can perform chaperone functions in the absence of ClpP (By similarity).                                                                                                                                          |
| N | Q5L4W6 | CC | It directs the protease to specific substrates                                                                                                                                                                   |
| N | Q5L4W6 | DE | ATP-dependent Clp protease ATP-binding subunit ClpX;                                                                                                                                                             |
| N | Q5L4W6 | DR | ATPase activity                                                                                                                                                                                                  |
| N | Q5L4W6 | DR | protein dimerization activity                                                                                                                                                                                    |
| N | Q5L4W6 | DR | protein folding                                                                                                                                                                                                  |
| N | Q5L4W6 | DR | unfolded protein binding                                                                                                                                                                                         |
| N | Q5L4W6 | DR | zinc ion binding                                                                                                                                                                                                 |
| N | Q5L588 | CC | Catalyzes the conversion of glucosamine-6-phosphate to glucosamine-1-phosphate (By similarity).                                                                                                                  |
| N | Q5L588 | DE | Phosphoglucosamine mutase;                                                                                                                                                                                       |
| N | Q5L588 | DR | carbohydrate metabolic process                                                                                                                                                                                   |
| N | Q5L588 | DR | magnesium ion binding                                                                                                                                                                                            |
| N | Q5L588 | DR | phosphoglucosamine mutase activity                                                                                                                                                                               |
| N | Q5L627 | CC | One of the essential components for the initiation of protein synthesis                                                                                                                                          |
| N | Q5L627 | CC | Also involved in the hydrolysis of GTP during the formation of the 70S ribosomal complex (By similarity).                                                                                                        |
| N | Q5L627 | CC | Protects formylmethionyl-tRNA from spontaneous hydrolysis and promotes its binding to the 30S ribosomal subunits                                                                                                 |
| N | Q5L627 | DE | Translation initiation factor IF-2;                                                                                                                                                                              |
| N | Q5L627 | DR | GTPase activity                                                                                                                                                                                                  |
| N | Q5L627 | DR | translation initiation factor activity                                                                                                                                                                           |
| N | Q5LNH0 | CC | F(1)F(0) ATP synthase produces ATP from ADP in the presence of a proton or sodium gradient                                                                                                                       |
| N | Q5LNH0 | CC | During catalysis, ATP synthesis in the catalytic domain of F(1) is coupled via a rotary mechanism of the central stalk subunits to proton translocation (By similarity).                                         |
| N | Q5LNH0 | CC | F-type ATPases consist of two structural domains, F(1) containing the extramembraneous catalytic core and F(0) containing the membrane proton channel, linked together by a central stalk and a peripheral stalk |
| N | Q5LNH0 | DE | ATP synthase F(0) sector subunit c;                                                                                                                                                                              |
| N | Q5LNH0 | DE | ATP synthase subunit c;                                                                                                                                                                                          |
| N | Q5LNH0 | DE | F-ATPase subunit c;                                                                                                                                                                                              |
| N | Q5LNH0 | DE | F-type ATPase subunit c;                                                                                                                                                                                         |
| N | Q5LNH0 | DE | Lipid-binding protein;                                                                                                                                                                                           |
| N | Q5LNH0 | DR | ATP hydrolysis coupled proton transport                                                                                                                                                                          |
| N | Q5LNH0 | DR | ATP synthesis coupled proton transport                                                                                                                                                                           |
| N | Q5LNH0 | DR | hydrogen ion transmembrane transporter activity                                                                                                                                                                  |
| N | Q5LNH0 | DR | lipid binding                                                                                                                                                                                                    |
| N | Q5LW59 | CC | One of the primary rRNA binding proteins                                                                                                                                                                         |
| N | Q5LW59 | CC | It has been suggested to have peptidyltransferase activity, this is somewhat controversial                                                                                                                       |
| N | Q5LW59 | CC | Makes several contacts with the 16S rRNA in the 70S ribosome (By similarity).                                                                                                                                    |
| N | Q5LW59 | CC | Required for association of the 30S and 50S subunits to form the 70S ribosome, for tRNA binding and peptide bond formation                                                                                       |
| N | Q5LW59 | DE | 50S ribosomal protein L2;                                                                                                                                                                                        |
| N | Q5LW59 | DR | structural constituent of ribosome                                                                                                                                                                               |
| N | Q5LW59 | DR | transferase activity                                                                                                                                                                                             |
| N | Q5LXR5 | CC | Protein S19 forms a complex with S13 that binds strongly to the 16S ribosomal RNA (By similarity).                                                                                                               |

|   |        |    |                                                                                                                                                                                         |
|---|--------|----|-----------------------------------------------------------------------------------------------------------------------------------------------------------------------------------------|
| N | Q5LXR5 | DE | 30S ribosomal protein S19;                                                                                                                                                              |
| N | Q5LXR5 | DR | structural constituent of ribosome                                                                                                                                                      |
| N | Q5M0X5 | CC | This protein specifically catalyzes the removal of signal peptides from prolipoproteins (By similarity).                                                                                |
| N | Q5M0X5 | DE | Lipoprotein signal peptidase;                                                                                                                                                           |
| N | Q5M0X5 | DE | Prolipoprotein signal peptidase;                                                                                                                                                        |
| N | Q5M0X5 | DE | Signal peptidase II;                                                                                                                                                                    |
| N | Q5M0X5 | DR | aspartic-type endopeptidase activity                                                                                                                                                    |
| N | Q5M117 | CC | Catalyzes the ATP-dependent phosphorylation of L- homoserine to L- homoserine phosphate (By similarity).                                                                                |
| N | Q5M117 | DE | Homoserine kinase;                                                                                                                                                                      |
| N | Q5M117 | DR | homoserine kinase activity                                                                                                                                                              |
| N | Q5M117 | DR | threonine biosynthetic process                                                                                                                                                          |
| N | Q5M376 | CC | Cell wall formation                                                                                                                                                                     |
| N | Q5M376 | CC | Adds enolpyruvyl to UDP-N- acetylglucosamine (By similarity).                                                                                                                           |
| N | Q5M376 | DE | Enolpyruvate transferase 2;                                                                                                                                                             |
| N | Q5M376 | DE | UDP-N-acetylglucosamine 1-carboxyvinyltransferase 2;                                                                                                                                    |
| N | Q5M376 | DE | UDP-N-acetylglucosamine enolpyruvyl transferase 2;                                                                                                                                      |
| N | Q5M376 | DR | UDP-N-acetylglucosamine biosynthetic process                                                                                                                                            |
| N | Q5M376 | DR | UDP-N-acetylglucosamine 1-carboxyvinyltransferase activity                                                                                                                              |
| N | Q5M376 | DR | cell division                                                                                                                                                                           |
| N | Q5M376 | DR | cellular cell wall organization                                                                                                                                                         |
| N | Q5M376 | DR | peptidoglycan biosynthetic process                                                                                                                                                      |
| N | Q5M376 | DR | regulation of cell shape                                                                                                                                                                |
| N | Q5M782 | CC | Mediates the import of RPA complex into the nucleus, via its interaction with importin beta (By similarity).                                                                            |
| N | Q5M782 | DE | RPA-interacting protein B;                                                                                                                                                              |
| N | Q5M782 | DR | metal ion binding                                                                                                                                                                       |
| N | Q5M9G5 | DE | Coiled-coil domain-containing protein 117;                                                                                                                                              |
| N | Q5MBK3 | CC | Pectinolytic enzymes consist of four classes of enzymes: pectine lyase, polygalacturonase, pectin methylesterase and rhamnogalacturonase                                                |
| N | Q5MBK3 | CC | Among pectinolytic enzymes, pectine lyase is the most important in depolymerization of pectin, since it cleaves internal glycosidic bonds of highly methylated pectins (By similarity). |
| N | Q5MBK3 | DE | Probable pectin lyase C;                                                                                                                                                                |
| N | Q5MBK3 | DR | cellular cell wall organization                                                                                                                                                         |
| N | Q5MBK3 | DR | pectin catabolic process                                                                                                                                                                |
| N | Q5MBK3 | DR | pectin lyase activity                                                                                                                                                                   |
| N | Q5MZB9 | DE | Photosystem II 13 kDa protein;                                                                                                                                                          |
| N | Q5MZB9 | DE | Photosystem II reaction center Psb28 protein;                                                                                                                                           |
| N | Q5MZB9 | DE | Photosystem II reaction center W protein;                                                                                                                                               |
| N | Q5MZB9 | DR | photosynthesis                                                                                                                                                                          |
| N | Q5N1P1 | CC | Synthesizes alpha-1,4-glucan chains using ADP-glucose.                                                                                                                                  |
| N | Q5N1P1 | DE | Glycogen synthase;                                                                                                                                                                      |
| N | Q5N1P1 | DE | Starch [bacterial glycogen] synthase;                                                                                                                                                   |
| N | Q5N1P1 | DR | glycogen biosynthetic process                                                                                                                                                           |
| N | Q5N1P1 | DR | starch synthase activity                                                                                                                                                                |
| N | Q5N1P5 | CC | Involved in protein export                                                                                                                                                              |
| N | Q5N1P5 | CC | Acts as a chaperone by maintaining the newly synthesized protein in an open conformation (By similarity).                                                                               |
| N | Q5N1P5 | DE | Trigger factor;                                                                                                                                                                         |
| N | Q5N1P5 | DR | cell division                                                                                                                                                                           |
| N | Q5N1P5 | DR | peptidyl-prolyl cis-trans isomerase activity                                                                                                                                            |
| N | Q5N1P5 | DR | protein folding                                                                                                                                                                         |
| N | Q5N1P5 | DR | protein transport                                                                                                                                                                       |
| N | Q5N3H1 | CC | The UVABC repair system catalyzes the recognition and processing of DNA lesions                                                                                                         |
| N | Q5N3H1 | CC | A damage recognition complex composed of 2 uvrA and 2 uvrB subunits scans DNA for abnormalities                                                                                         |
| N | Q5N3H1 | CC | DNA wrap is dependent on ATP binding by uvrB and probably causes local melting of the DNA helix, facilitating insertion of uvrB beta-hairpin between the DNA strands                    |
| N | Q5N3H1 | CC | If a lesion is found the uvrA subunits dissociate and the uvrB-DNA preincision complex is formed                                                                                        |
| N | Q5N3H1 | CC | If no lesion is found, the DNA wraps around the other uvrB subunit that will check the other stand for damage (By similarity).                                                          |
| N | Q5N3H1 | CC | Then uvrB probes one DNA strand for the presence of a lesion                                                                                                                            |

|   |        |    |                                                                                                                                                                                                                                                                                                                                                                                                                                    |
|---|--------|----|------------------------------------------------------------------------------------------------------------------------------------------------------------------------------------------------------------------------------------------------------------------------------------------------------------------------------------------------------------------------------------------------------------------------------------|
| N | Q5N3H1 | CC | This complex is subsequently bound by uvrC and the second uvrB is released                                                                                                                                                                                                                                                                                                                                                         |
| N | Q5N3H1 | CC | Upon binding of the uvrA(2)B(2) complex to a putative damaged site, the DNA wraps around one uvrB monomer                                                                                                                                                                                                                                                                                                                          |
| N | Q5N3H1 | DE | Excinuclease ABC subunit B;                                                                                                                                                                                                                                                                                                                                                                                                        |
| N | Q5N3H1 | DE | Protein uvrB;                                                                                                                                                                                                                                                                                                                                                                                                                      |
| N | Q5N3H1 | DE | UvrABC system protein B;                                                                                                                                                                                                                                                                                                                                                                                                           |
| N | Q5N3H1 | DR | excinuclease ABC activity                                                                                                                                                                                                                                                                                                                                                                                                          |
| N | Q5N3H1 | DR | helicase activity                                                                                                                                                                                                                                                                                                                                                                                                                  |
| N | Q5N3H1 | DR | nucleotide-excision repair                                                                                                                                                                                                                                                                                                                                                                                                         |
| N | Q5N643 | DE | Arginine--tRNA ligase;                                                                                                                                                                                                                                                                                                                                                                                                             |
| N | Q5N643 | DE | Arginyl-tRNA synthetase;                                                                                                                                                                                                                                                                                                                                                                                                           |
| N | Q5N643 | DR | arginine-tRNA ligase activity                                                                                                                                                                                                                                                                                                                                                                                                      |
| N | Q5N643 | DR | arginyl-tRNA aminoacylation                                                                                                                                                                                                                                                                                                                                                                                                        |
| N | Q5NA06 | CC | The coatomer is a cytosolic protein complex that binds to dilysine motifs and reversibly associates with Golgi non- clathrin-coated vesicles, which further mediate biosynthetic protein transport from the ER, via the Golgi up to the trans Golgi network. Coatomer complex is required for budding from Golgi membranes, and is essential for the retrograde Golgi-to-ER transport of dilysine-tagged proteins (By similarity). |
| N | Q5NA06 | CC | Coatomer subunit zeta-3;                                                                                                                                                                                                                                                                                                                                                                                                           |
| N | Q5NA06 | DE | Zeta-3-coat protein;                                                                                                                                                                                                                                                                                                                                                                                                               |
| N | Q5NA06 | DR | protein transport                                                                                                                                                                                                                                                                                                                                                                                                                  |
| N | Q5NA06 | DR | vesicle-mediated transport                                                                                                                                                                                                                                                                                                                                                                                                         |
| N | Q5NAV3 | DE | Zinc finger CCCH domain-containing protein 5;                                                                                                                                                                                                                                                                                                                                                                                      |
| N | Q5NAV3 | DE | Zinc finger CCCH domain-containing protein ZFN-like 3;                                                                                                                                                                                                                                                                                                                                                                             |
| N | Q5NAV3 | DR | zinc ion binding                                                                                                                                                                                                                                                                                                                                                                                                                   |
| N | Q5NFT3 | CC | Catalyzes the ferrous insertion into protoporphyrin IX.                                                                                                                                                                                                                                                                                                                                                                            |
| N | Q5NFT3 | DE | Ferrochelataase;                                                                                                                                                                                                                                                                                                                                                                                                                   |
| N | Q5NFT3 | DE | Heme synthase;                                                                                                                                                                                                                                                                                                                                                                                                                     |
| N | Q5NFT3 | DE | Protoheme ferro-lyase;                                                                                                                                                                                                                                                                                                                                                                                                             |
| N | Q5NFT3 | DR | ferrochelataase activity                                                                                                                                                                                                                                                                                                                                                                                                           |
| N | Q5NFT3 | DR | heme biosynthetic process                                                                                                                                                                                                                                                                                                                                                                                                          |
| N | Q5NFT3 | DR | metal ion binding                                                                                                                                                                                                                                                                                                                                                                                                                  |
| N | Q5NHX1 | CC | One of the primary rRNA binding proteins, it binds directly to 16S rRNA where it nucleates assembly of the head domain of the 30S subunit                                                                                                                                                                                                                                                                                          |
| N | Q5NHX1 | CC | Is located at the subunit interface close to the decoding center, probably blocks exit of the E-site tRNA (By similarity).                                                                                                                                                                                                                                                                                                         |
| N | Q5NHX1 | DE | 30S ribosomal protein S7;                                                                                                                                                                                                                                                                                                                                                                                                          |
| N | Q5NHX1 | DR | structural constituent of ribosome                                                                                                                                                                                                                                                                                                                                                                                                 |
| N | Q5NID1 | CC | DNA-dependent RNA polymerase catalyzes the transcription of DNA into RNA using the four ribonucleoside triphosphates as substrates.                                                                                                                                                                                                                                                                                                |
| N | Q5NID1 | DE | DNA-directed RNA polymerase subunit beta';                                                                                                                                                                                                                                                                                                                                                                                         |
| N | Q5NID1 | DE | RNA polymerase subunit beta';                                                                                                                                                                                                                                                                                                                                                                                                      |
| N | Q5NID1 | DE | RNAP subunit beta';                                                                                                                                                                                                                                                                                                                                                                                                                |
| N | Q5NID1 | DE | Transcriptase subunit beta';                                                                                                                                                                                                                                                                                                                                                                                                       |
| N | Q5NID1 | DR | DNA-directed RNA polymerase activity                                                                                                                                                                                                                                                                                                                                                                                               |
| N | Q5NQN1 | DE | UPF0301 protein ZMO0349;                                                                                                                                                                                                                                                                                                                                                                                                           |
| N | Q5NR81 | CC | Catalyzes the formation of N(7)-methylguanine at position 46 (m7G46) in tRNA (By similarity).                                                                                                                                                                                                                                                                                                                                      |
| N | Q5NR81 | DE | tRNA (guanine-N(7)-)-methyltransferase;                                                                                                                                                                                                                                                                                                                                                                                            |
| N | Q5NR81 | DE | tRNA(m7G46)-methyltransferase;                                                                                                                                                                                                                                                                                                                                                                                                     |
| N | Q5NR81 | DR | tRNA (guanine-N7-)-methyltransferase activity                                                                                                                                                                                                                                                                                                                                                                                      |
| N | Q5P4P5 | CC | Exhibits a very high intrinsic GTPase hydrolysis rate involved in the addition of a carboxymethylaminomethyl (cmnm) group at the wobble position (U34) of certain tRNAs, forming tRNA- cmnm(5)s(2)U34 (By similarity).                                                                                                                                                                                                             |
| N | Q5P4P5 | CC | tRNA modification GTPase mnmE;                                                                                                                                                                                                                                                                                                                                                                                                     |
| N | Q5P4P5 | DE | GTPase activity                                                                                                                                                                                                                                                                                                                                                                                                                    |
| N | Q5P4P5 | DR | metal ion binding                                                                                                                                                                                                                                                                                                                                                                                                                  |
| N | Q5P4P5 | DR | tRNA modification                                                                                                                                                                                                                                                                                                                                                                                                                  |
| N | Q5P7Z5 | DE | 50S ribosomal protein L27;                                                                                                                                                                                                                                                                                                                                                                                                         |
| N | Q5P7Z5 | DR | structural constituent of ribosome                                                                                                                                                                                                                                                                                                                                                                                                 |
| N | Q5P9A5 | CC | This is one of the proteins that binds to the 5S RNA in the ribosome where it forms part of the central protuberance (By similarity).                                                                                                                                                                                                                                                                                              |
| N | Q5P9A5 | DE | 50S ribosomal protein L25;                                                                                                                                                                                                                                                                                                                                                                                                         |
| N | Q5P9A5 | DE | General stress protein CTC;                                                                                                                                                                                                                                                                                                                                                                                                        |
| N | Q5P9A5 | DR | 5S rRNA binding                                                                                                                                                                                                                                                                                                                                                                                                                    |

|   |        |    |                                                                                                                                                                                                                                           |
|---|--------|----|-------------------------------------------------------------------------------------------------------------------------------------------------------------------------------------------------------------------------------------------|
| N | Q5P9A5 | DR | structural constituent of ribosome                                                                                                                                                                                                        |
| N | Q5PA96 | DE | 50S ribosomal protein L32;                                                                                                                                                                                                                |
| N | Q5PA96 | DR | structural constituent of ribosome                                                                                                                                                                                                        |
| N | Q5PBR8 | CC | One of the proteins required for the normal export of preproteins out of the cell cytoplasm                                                                                                                                               |
| N | Q5PBR8 | CC | It also specifically binds to its receptor secA (By similarity).                                                                                                                                                                          |
| N | Q5PBR8 | CC | It is a molecular chaperone that binds to a subset of precursor proteins, maintaining them in a translocation-competent state                                                                                                             |
| N | Q5PBR8 | DE | Protein-export protein secB;                                                                                                                                                                                                              |
| N | Q5PBR8 | DR | protein tetramerization                                                                                                                                                                                                                   |
| N | Q5PBR8 | DR | protein transport                                                                                                                                                                                                                         |
| N | Q5PBR8 | DR | transmembrane transport                                                                                                                                                                                                                   |
| N | Q5PBR8 | DR | unfolded protein binding                                                                                                                                                                                                                  |
| N | Q5PCF3 | CC | Catalyzes the hydrolysis of the pyrophosphate bond of UDP-2,3-diacylglycerolglucosamine to yield 2,3-diacylglycerolglucosamine 1-phosphate (lipid X) and <del>UMP (By similarity)</del>                                                   |
| N | Q5PCF3 | DE | UDP-2,3-diacylglycerolglucosamine hydrolase;                                                                                                                                                                                              |
| N | Q5PCF3 | DR | lipid A biosynthetic process                                                                                                                                                                                                              |
| N | Q5PCF3 | DR | pyrophosphatase activity                                                                                                                                                                                                                  |
| N | Q5PDA1 | CC | Catalyzes the decarboxylation of S-adenosylmethionine to S-adenosylmethioninamine (dcAdoMet), the propylamine donor required for the synthesis of the polyamines spermine and spermidine from the diamine putrescine (By similarity)      |
| N | Q5PDA1 | DE | S-adenosylmethionine decarboxylase alpha chain;                                                                                                                                                                                           |
| N | Q5PDA1 | DE | S-adenosylmethionine decarboxylase beta chain;                                                                                                                                                                                            |
| N | Q5PDA1 | DE | S-adenosylmethionine decarboxylase proenzyme;                                                                                                                                                                                             |
| N | Q5PDA1 | DR | adenosylmethionine decarboxylase activity                                                                                                                                                                                                 |
| N | Q5PDA1 | DR | spermidine biosynthetic process                                                                                                                                                                                                           |
| N | Q5PEN3 | CC | Accelerates the degradation of transcripts by removing pyrophosphate from the 5'-end of triphosphorylated RNA, leading to a more labile monophosphorylated state that can stimulate subsequent ribonuclease cleavage (By similarity).     |
| N | Q5PEN3 | DE | (Di)nucleoside polyphosphate hydrolase;                                                                                                                                                                                                   |
| N | Q5PEN3 | DE | RNA pyrophosphohydrolase;                                                                                                                                                                                                                 |
| N | Q5PEN3 | DR | hydrolase activity                                                                                                                                                                                                                        |
| N | Q5PFV0 | CC | Inhibits RpoS proteolysis by regulating RssB activity, thereby increasing the stability of the sigma stress factor RpoS especially during phosphate and magnesium starvation, but also in stationary phase and during nitrogen starvation |
| N | Q5PFV0 | CC | Its effect on RpoS stability is due to its interaction with RssB, which probably blocks the interaction of RssB with RpoS, and the consequent delivery of the RssB-RpoS complex to the ClpXP protein degradation pathway (By similarity). |
| N | Q5PFV0 | DE | Anti-adaptor protein iraP;                                                                                                                                                                                                                |
| N | Q5PFV0 | DR | response to stress                                                                                                                                                                                                                        |
| N | Q5PLF2 | CC | Catalyzes the phosphorylation of N-acetylmannosamine (ManNAc) to ManNAc-6-P (By similarity).                                                                                                                                              |
| N | Q5PLF2 | DE | ManNAc kinase;                                                                                                                                                                                                                            |
| N | Q5PLF2 | DE | N-acetyl-D-mannosamine kinase;                                                                                                                                                                                                            |
| N | Q5PLF2 | DE | N-acetylmannosamine kinase;                                                                                                                                                                                                               |
| N | Q5PLF2 | DR | N-acylmannosamine kinase activity                                                                                                                                                                                                         |
| N | Q5PLF2 | DR | metal ion binding                                                                                                                                                                                                                         |
| N | Q5PNG3 | CC | Catalyzes the formation of 2'O-methylated cytidine (Cm32) or 2'O-methylated uridine (Um32) at position 32 in tRNA (By similarity).                                                                                                        |
| N | Q5PNG3 | DE | tRNA (cytidine/uridine-2'-O-)-methyltransferase TrmJ;                                                                                                                                                                                     |
| N | Q5PNG3 | DE | tRNA Cm32/Um32 methyltransferase;                                                                                                                                                                                                         |
| N | Q5PNG3 | DR | RNA methyltransferase activity                                                                                                                                                                                                            |
| N | Q5PNG3 | DR | tRNA processing                                                                                                                                                                                                                           |
| N | Q5QQ52 | CC | Catalyzes the first step in biosynthesis of glycosaminoglycan                                                                                                                                                                             |
| N | Q5QQ52 | CC | Initial enzyme in the biosynthesis of chondroitin sulfate and dermatan sulfate proteoglycans in fibroblasts and chondrocytes (By similarity).                                                                                             |
| N | Q5QQ52 | CC | Transfers D-xylose from UDP-D-xylose to specific serine residues of the core protein                                                                                                                                                      |
| N | Q5QQ52 | DE | Peptide O-xylosyltransferase;                                                                                                                                                                                                             |
| N | Q5QQ52 | DE | Squashed vulva protein 6;                                                                                                                                                                                                                 |
| N | Q5QQ52 | DE | Xylosyltransferase sqv-6;                                                                                                                                                                                                                 |
| N | Q5QQ52 | DR | acetylglucosaminyltransferase activity                                                                                                                                                                                                    |
| N | Q5QQ52 | DR | protein xylosyltransferase activity                                                                                                                                                                                                       |
| N | Q5QTZ0 | CC | Responsible for synthesis of pseudouridine from uracil- 55 in the psi GC loop of transfer RNAs (By similarity).                                                                                                                           |
| N | Q5QTZ0 | DE | Psi55 synthase;                                                                                                                                                                                                                           |

|   |        |    |                                                                                                                                                                                                                                                                                                                                                                                           |
|---|--------|----|-------------------------------------------------------------------------------------------------------------------------------------------------------------------------------------------------------------------------------------------------------------------------------------------------------------------------------------------------------------------------------------------|
| N | Q5QTZ0 | DE | tRNA pseudouridine 55 synthase;                                                                                                                                                                                                                                                                                                                                                           |
| N | Q5QTZ0 | DE | tRNA pseudouridine synthase B;                                                                                                                                                                                                                                                                                                                                                            |
| N | Q5QTZ0 | DE | tRNA pseudouridyate synthase;                                                                                                                                                                                                                                                                                                                                                             |
| N | Q5QTZ0 | DE | tRNA-uridine isomerase;                                                                                                                                                                                                                                                                                                                                                                   |
| N | Q5QTZ0 | DR | pseudouridine synthase activity                                                                                                                                                                                                                                                                                                                                                           |
| N | Q5QTZ0 | DR | pseudouridine synthesis                                                                                                                                                                                                                                                                                                                                                                   |
| N | Q5QTZ0 | DR | tRNA processing                                                                                                                                                                                                                                                                                                                                                                           |
| N | Q5QVT8 | CC | Involved in peptide bond synthesis<br>probably functions indirectly by altering the affinity of the ribosome for<br>aminoacyl-tRNA, thus increasing their reactivity as acceptors for peptidyl<br>transferase (By similarity).                                                                                                                                                            |
| N | Q5QVT8 | CC | Stimulates efficient translation and peptide-bond synthesis on native or<br>reconstituted 70S ribosomes in vitro                                                                                                                                                                                                                                                                          |
| N | Q5QVT8 | DE | Elongation factor P;                                                                                                                                                                                                                                                                                                                                                                      |
| N | Q5QVT8 | DR | peptide biosynthetic process                                                                                                                                                                                                                                                                                                                                                              |
| N | Q5QVT8 | DR | translation elongation factor activity                                                                                                                                                                                                                                                                                                                                                    |
| N | Q5QVT9 | CC | Methylates ribosomal protein L11 (By similarity).                                                                                                                                                                                                                                                                                                                                         |
| N | Q5QVT9 | DE | Ribosomal protein L11 methyltransferase;                                                                                                                                                                                                                                                                                                                                                  |
| N | Q5QVT9 | DR | protein methyltransferase activity                                                                                                                                                                                                                                                                                                                                                        |
| N | Q5QW47 | CC | Binds specifically to the ssrA RNA (tmRNA) and is required for stable<br>association of ssrA with ribosomes (By similarity).                                                                                                                                                                                                                                                              |
| N | Q5QW47 | DE | SsrA-binding protein;                                                                                                                                                                                                                                                                                                                                                                     |
| N | Q5R461 | DE | Oligodendrocytic myelin paranodal and inner loop protein;                                                                                                                                                                                                                                                                                                                                 |
| N | Q5R461 | DE | Transmembrane protein 10;                                                                                                                                                                                                                                                                                                                                                                 |
| N | Q5R4G5 | CC | Involved in membrane protein trafficking at the base of the ciliary organelle                                                                                                                                                                                                                                                                                                             |
| N | Q5R4G5 | CC | May be required for proper retinal function and organization (By similarity).                                                                                                                                                                                                                                                                                                             |
| N | Q5R4G5 | CC | May regulate cilia assembly and disassembly and subsequent ciliary signaling<br>events such as the Wnt signaling cascade                                                                                                                                                                                                                                                                  |
| N | Q5R4G5 | CC | Mediates recruitment onto plasma membrane of the BBSome complex which<br>would constitute a coat complex required for sorting of specific membrane<br>proteins to the primary cilia                                                                                                                                                                                                       |
| N | Q5R4G5 | DE | ADP-ribosylation factor-like protein 6;                                                                                                                                                                                                                                                                                                                                                   |
| N | Q5R4G5 | DR | cell projection organization                                                                                                                                                                                                                                                                                                                                                              |
| N | Q5R4G5 | DR | metal ion binding                                                                                                                                                                                                                                                                                                                                                                         |
| N | Q5R4G5 | DR | small GTPase mediated signal transduction                                                                                                                                                                                                                                                                                                                                                 |
| N | Q5R4K3 | CC | Serine/threonine kinase required for the mitogen or stress-induced<br>phosphorylation of the transcription factors CREB (cAMP response element-<br>binding protein) and ATF1 (activating transcription factor-1)                                                                                                                                                                          |
| N | Q5R4K3 | CC | Directly represses transcription via phosphorylation of 'Ser-1' of histone H2A                                                                                                                                                                                                                                                                                                            |
| N | Q5R4K3 | CC | Essential role in the control of RELA transcriptional activity in response to TNF                                                                                                                                                                                                                                                                                                         |
| N | Q5R4K3 | CC | May also phosphorylate 'Ser-28' of histone H3                                                                                                                                                                                                                                                                                                                                             |
| N | Q5R4K3 | CC | Mediates the mitogen- and stress-induced phosphorylation of high mobility group<br>protein 14 (HMG-14) (By similarity).<br>Phosphorylates Ser-10 of histone H3 in response to mitogenics, stress stimuli<br>and epidermal growth-factor (EGF), which results in the transcriptional activation<br>of several immediate early genes, including proto-oncogenes c-fos/FOS and c-<br>jun/JUN |
| N | Q5R4K3 | DE | Ribosomal protein S6 kinase alpha-5;                                                                                                                                                                                                                                                                                                                                                      |
| N | Q5R4K3 | DE | S6K-alpha-5;                                                                                                                                                                                                                                                                                                                                                                              |
| N | Q5R4K3 | DR | magnesium ion binding                                                                                                                                                                                                                                                                                                                                                                     |
| N | Q5R4K3 | DR | protein serine/threonine kinase activity                                                                                                                                                                                                                                                                                                                                                  |
| N | Q5R537 | CC | Thrombin, which cleaves bonds after Arg and Lys, converts prothrombin to thrombin<br>and activates factors V, VII, VIII, XIII, and, in complex with thrombomodulin,<br>protein C                                                                                                                                                                                                          |
| N | Q5R537 | CC | Functions in blood homeostasis, inflammation and wound healing (By similarity).                                                                                                                                                                                                                                                                                                           |
| N | Q5R537 | DE | Activation peptide fragment 1;                                                                                                                                                                                                                                                                                                                                                            |
| N | Q5R537 | DE | Activation peptide fragment 2;                                                                                                                                                                                                                                                                                                                                                            |
| N | Q5R537 | DE | Coagulation factor II;                                                                                                                                                                                                                                                                                                                                                                    |
| N | Q5R537 | DE | Prothrombin;                                                                                                                                                                                                                                                                                                                                                                              |
| N | Q5R537 | DE | Thrombin heavy chain;                                                                                                                                                                                                                                                                                                                                                                     |
| N | Q5R537 | DE | Thrombin light chain;                                                                                                                                                                                                                                                                                                                                                                     |
| N | Q5R537 | DR | acute-phase response                                                                                                                                                                                                                                                                                                                                                                      |
| N | Q5R537 | DR | calcium ion binding                                                                                                                                                                                                                                                                                                                                                                       |
| N | Q5R5J8 | CC | The ZDHHC9-GOLGA7 complex is a palmitoyltransferase specific for HRAS<br>and NRAS (By similarity).                                                                                                                                                                                                                                                                                        |
| N | Q5R5J8 | DE | Palmitoyltransferase ZDHHC9;                                                                                                                                                                                                                                                                                                                                                              |
| N | Q5R5J8 | DE | Zinc finger DHHC domain-containing protein 9;                                                                                                                                                                                                                                                                                                                                             |
| N | Q5R5J8 | DR | acyltransferase activity                                                                                                                                                                                                                                                                                                                                                                  |

|   |        |    |                                                                                                                                                          |
|---|--------|----|----------------------------------------------------------------------------------------------------------------------------------------------------------|
| N | Q5R5J8 | DR | zinc ion binding                                                                                                                                         |
| N | Q5R637 | CC | Molecular chaperone; assists the folding of proteins upon ATP hydrolysis                                                                                 |
| N | Q5R637 | CC | As part of the BBS/CCT complex may play a role in the assembly of BBSome, a complex involved in ciliogenesis regulating transports vesicles to the cilia |
| N | Q5R637 | CC | Known to play a role, in vitro, in the folding of actin and tubulin (By similarity).                                                                     |
| N | Q5R637 | DE | T-complex protein 1 subunit delta;                                                                                                                       |
| N | Q5R637 | DE | TCP-1-delta;                                                                                                                                             |
| N | Q5R637 | DR | protein folding                                                                                                                                          |
| N | Q5R637 | DR | unfolded protein binding                                                                                                                                 |
| N | Q5R6B5 | CC | ALDHs play a major role in the detoxification of alcohol-derived acetaldehyde                                                                            |
| N | Q5R6B5 | CC | They are involved in the metabolism of corticosteroids, biogenic amines, neurotransmitters, and lipid peroxidation (By similarity).                      |
| N | Q5R6B5 | DE | Aldehyde dehydrogenase X, mitochondrial;                                                                                                                 |
| N | Q5R6B5 | DE | Aldehyde dehydrogenase family 1 member B1;                                                                                                               |
| N | Q5R6B5 | DR | aldehyde dehydrogenase (NAD) activity                                                                                                                    |
| N | Q5R6B5 | DR | oxidation-reduction process                                                                                                                              |
| N | Q5R947 | CC | Component of the 60-80S U3 small nucleolar ribonucleoprotein (U3 snoRNP)                                                                                 |
| N | Q5R947 | CC | Required for the early cleavages during pre-18S ribosomal RNA processing (By similarity).                                                                |
| N | Q5R947 | DE | U3 small nucleolar ribonucleoprotein protein IMP4;                                                                                                       |
| N | Q5R947 | DE | U3 snoRNP protein IMP4;                                                                                                                                  |
| N | Q5R947 | DR | aminoacyl-tRNA ligase activity                                                                                                                           |
| N | Q5R947 | DR | rRNA processing                                                                                                                                          |
| N | Q5R9H0 | CC | Transfers the glycosyl residue from UDP-Glc to the non- reducing end of alpha-1,4-glucan (By similarity).                                                |
| N | Q5R9H0 | DE | Glycogen [starch] synthase, muscle;                                                                                                                      |
| N | Q5R9H0 | DR | glycogen (starch) synthase activity                                                                                                                      |
| N | Q5R9H0 | DR | glycogen biosynthetic process                                                                                                                            |
| N | Q5R9M7 | CC | Modulates endosomal trafficking                                                                                                                          |
| N | Q5R9M7 | CC | Acts as a major regulator of membrane delivery during cytokinesis (By similarity)                                                                        |
| N | Q5R9M7 | DE | Ras-related protein Rab-11A;                                                                                                                             |
| N | Q5R9M7 | DR | GTPase activity                                                                                                                                          |
| N | Q5R9M7 | DR | protein transport                                                                                                                                        |
| N | Q5R9M7 | DR | small GTPase mediated signal transduction                                                                                                                |
| N | Q5RAP3 | DE | Tetraspanin-4;                                                                                                                                           |
| N | Q5RAT9 | CC | Cell surface proteoglycan that bears heparan sulfate (By similarity).                                                                                    |
| N | Q5RAT9 | DR | cytoskeletal protein binding                                                                                                                             |
| N | Q5RBC3 | CC | Glycosyltransferase required for the biosynthesis of heparan-sulfate                                                                                     |
| N | Q5RBC3 | CC | The EXT1/EXT2 complex possesses substantially higher glycosyltransferase activity than EXT1 or EXT2 alone (By similarity).                               |
| N | Q5RBC3 | DE | Exostosin-1;                                                                                                                                             |
| N | Q5RBC3 | DE | Glucuronosyl-N-acetylglucosaminyl-proteoglycan/N-acetylglucosaminyl-proteoglycan 4-alpha-N-acetylglucosaminyltransferase;                                |
| N | Q5RBC3 | DE | Multiple exostosins protein 1 homolog;                                                                                                                   |
| N | Q5RBC3 | DR | N-acetylglucosaminyl-proteoglycan 4-beta-glucuronosyltransferase activity                                                                                |
| N | Q5RBC3 | DR | glucuronosyl-N-acetylglucosaminyl-proteoglycan 4-alpha-N-acetylglucosaminyltransferase activity                                                          |
| N | Q5RBM8 | DE | RNA-binding motif protein 12;                                                                                                                            |
| N | Q5RBM8 | DE | RNA-binding protein 12;                                                                                                                                  |
| N | Q5RBM8 | DR | nucleotide binding                                                                                                                                       |
| N | Q5RBU7 | CC | Cleaves C-terminal amino acids linked to proline in peptides such as angiotensin II, III and des-Arg9-bradykinin                                         |
| N | Q5RBU7 | CC | This cleavage occurs at acidic pH, but enzymatic activity is retained with some substrates at neutral pH (By similarity).                                |
| N | Q5RBU7 | DE | Lysosomal Pro-X carboxypeptidase;                                                                                                                        |
| N | Q5RBU7 | DE | Proline carboxypeptidase;                                                                                                                                |
| N | Q5RBU7 | DE | Prolylcarboxypeptidase;                                                                                                                                  |
| N | Q5RBU7 | DR | carboxypeptidase activity                                                                                                                                |
| N | Q5RBU7 | DR | serine-type peptidase activity                                                                                                                           |
| N | Q5RBU8 | CC | Involved with pre-mRNA processing                                                                                                                        |
| N | Q5RBU8 | CC | Forms complexes (ribonucleosomes) with at least 20 other different hnRNP and heterogeneous nuclear RNA in the nucleous (By similarity).                  |
| N | Q5RBU8 | DE | Heterogeneous nuclear ribonucleoproteins A2/B1;                                                                                                          |
| N | Q5RBU8 | DE | hnRNP A2/B1;                                                                                                                                             |
| N | Q5RBU8 | DR | mRNA processing                                                                                                                                          |



|   |        |    |                                                                                                                                                                                     |
|---|--------|----|-------------------------------------------------------------------------------------------------------------------------------------------------------------------------------------|
| N | Q5RBU8 | DR | nucleotide binding                                                                                                                                                                  |
| N | Q5RBZ8 | DE | Transmembrane protein 41B;                                                                                                                                                          |
| N | Q5RCG1 | DE | Transmembrane protein 192;                                                                                                                                                          |
| N | Q5RD60 | CC | Functions as a coactivator for aryl hydrocarbon and nuclear receptors (NR)                                                                                                          |
| N | Q5RD60 | CC | Coactivator function for nuclear receptors and LEF1/CTNNB1 involves differential utilization of two different activation regions (By similarity).                                   |
| N | Q5RD60 | CC | During ER-activation acts synergistically in combination with other NCOA2-binding proteins, such as EP300, CREBBP and CARM1                                                         |
| N | Q5RD60 | CC | Functions as a secondary coactivator in LEF1- mediated transcriptional activation via its interaction with CTNNB1                                                                   |
| N | Q5RD60 | CC | Involved in the transcriptional activation of target genes in the Wnt/CTNNB1 pathway                                                                                                |
| N | Q5RD60 | CC | Recruited to promoters through its contact with the N-terminal basic helix-loop-helix-Per-Arnt-Sim (PAS) domain of transcription factors or coactivators, such as NCOA2             |
| N | Q5RD60 | DE | Calcium-binding and coiled-coil domain-containing protein 1;                                                                                                                        |
| N | Q5RD60 | DR | Wnt receptor signaling pathway                                                                                                                                                      |
|   |        |    | Antiporter transporting nucleotide sugars such as UDP-N- acetylglucosamine (UDP-GlcNAc), UDP-glucose (UDP-Glc) and GDP- mannose (GDP-Man)                                           |
| N | Q5RDC9 | CC | pooled in the cytosol into the lumen of the Golgi in exchange for the corresponding nucleosides monophosphates (UMP for UDP-sugars and GMP for GDP-mannose)                         |
| N | Q5RDC9 | CC | May take part in heparan sulfate synthesis by supplying UDP-Glc-Nac, the donor substrate, and thus be involved in growth factor signaling (By similarity).                          |
| N | Q5RDC9 | DE | Solute carrier family 35 member D2;                                                                                                                                                 |
| N | Q5RDC9 | DE | UDP-N-acetylglucosamine/UDP-glucose/GDP-mannose transporter;                                                                                                                        |
| N | Q5RDC9 | DR | carbohydrate transport                                                                                                                                                              |
| N | Q5RDD3 | CC | Accepts electrons from ETF and reduces ubiquinone (By similarity).                                                                                                                  |
| N | Q5RDD3 | DE | ETF dehydrogenase;                                                                                                                                                                  |
| N | Q5RDD3 | DE | ETF-ubiquinone oxidoreductase;                                                                                                                                                      |
| N | Q5RDD3 | DE | Electron transfer flavoprotein-ubiquinone oxidoreductase, mitochondrial;                                                                                                            |
| N | Q5RDD3 | DE | Electron-transferring-flavoprotein dehydrogenase;                                                                                                                                   |
| N | Q5RDD3 | DR | 4 iron, 4 sulfur cluster binding                                                                                                                                                    |
| N | Q5RDD3 | DR | electron transport chain                                                                                                                                                            |
| N | Q5RDD3 | DR | electron-transferring-flavoprotein dehydrogenase activity                                                                                                                           |
| N | Q5RDD3 | DR | metal ion binding                                                                                                                                                                   |
| N | Q5REI9 | DE | Tumor protein p53-inducible protein 11;                                                                                                                                             |
| N | Q5REI9 | DE | p53-induced gene 11 protein;                                                                                                                                                        |
| N | Q5REY3 | CC | Involved in redox regulation of the cell                                                                                                                                            |
| N | Q5REY3 | CC | Protects radical-sensitive enzymes from oxidative damage by a radical-generating system (By similarity).                                                                            |
| N | Q5REY3 | DE | Peroxiredoxin-3;                                                                                                                                                                    |
| N | Q5REY3 | DE | Thioredoxin-dependent peroxide reductase, mitochondrial;                                                                                                                            |
| N | Q5REY3 | DR | cell redox homeostasis                                                                                                                                                              |
| N | Q5REY3 | DR | oxidation-reduction process                                                                                                                                                         |
| N | Q5REY3 | DR | peroxidase activity                                                                                                                                                                 |
| N | Q5REY3 | DR | peroxiredoxin activity                                                                                                                                                              |
| N | Q5REY6 | CC | Regulates a signal transduction pathway linking plasma membrane receptors to the assembly of focal adhesions and actin stress fibers                                                |
| N | Q5REY6 | CC | Activated by ARHGEF2, which promotes the exchange of GDP for GTP                                                                                                                    |
| N | Q5REY6 | CC | Essential for the SPATA13-mediated regulation of cell migration and adhesion assembly and disassembly (By similarity).                                                              |
| N | Q5REY6 | CC | May be an activator of PLCE1                                                                                                                                                        |
| N | Q5REY6 | DE | Transforming protein RhoA;                                                                                                                                                          |
| N | Q5REY6 | DR | small GTPase mediated signal transduction                                                                                                                                           |
| N | Q5RGJ8 | CC | Catalyzes the formation of mannose 6-phosphate (M6P) markers on high mannose type oligosaccharides in the Golgi apparatus                                                           |
|   |        |    | M6P residues are required to bind to the M6P receptors (MPR), which mediate the vesicular transport of lysosomal enzymes to the endosomal/prelysosomal compartment (By similarity). |
| N | Q5RGJ8 | DE | GlcNAc-1-phosphotransferase subunits alpha/beta;                                                                                                                                    |
| N | Q5RGJ8 | DE | N-acetylglucosamine-1-phosphotransferase subunit alpha;                                                                                                                             |
| N | Q5RGJ8 | DE | N-acetylglucosamine-1-phosphotransferase subunit beta;                                                                                                                              |
| N | Q5RGJ8 | DE | N-acetylglucosamine-1-phosphotransferase subunits alpha/beta;                                                                                                                       |
| N | Q5RGJ8 | DE | Stealth protein gnptab;                                                                                                                                                             |
| N | Q5RGJ8 | DE | UDP-N-acetylglucosamine-1-phosphotransferase subunits alpha/beta;                                                                                                                   |
| N | Q5RGJ8 | DR | UDP-N-acetylglucosamine-lysosomal-enzyme N-acetylglucosaminophosphotransferase activity                                                                                             |

|   |        |    |                                                                                                                                                                                                                                      |
|---|--------|----|--------------------------------------------------------------------------------------------------------------------------------------------------------------------------------------------------------------------------------------|
| N | Q5RGJ8 | DR | chondrocyte development                                                                                                                                                                                                              |
| N | Q5RGJ8 | DR | embryonic cranial skeleton morphogenesis                                                                                                                                                                                             |
| N | Q5RGJ8 | DR | metal ion binding                                                                                                                                                                                                                    |
| N | Q5RGJ8 | DR | transcription factor binding                                                                                                                                                                                                         |
| N | Q5RKI9 | CC | Responsible for the release of ribosomes from messenger RNA at the termination of protein biosynthesis                                                                                                                               |
| N | Q5RKI9 | CC | May increase the efficiency of translation by recycling ribosomes from one round of translation to another (By similarity).                                                                                                          |
| N | Q5RKI9 | DE | Ribosome-recycling factor, mitochondrial;                                                                                                                                                                                            |
| N | Q5RKI9 | DE | Ribosome-releasing factor, mitochondrial;                                                                                                                                                                                            |
| N | Q5RKI9 | DR | regulation of transcription, DNA-dependent                                                                                                                                                                                           |
| N | Q5RKI9 | DR | sequence-specific DNA binding transcription factor activity                                                                                                                                                                          |
| N | Q5SHG2 | CC | Component of the acetyl coenzyme A carboxylase (ACC) complex                                                                                                                                                                         |
| N | Q5SHG2 | CC | Biotin carboxylase (BC) catalyzes the carboxylation of biotin on its carrier protein (BCCP) and then the CO(2) group is transferred by the transcarboxylase to acetyl-CoA to form malonyl- CoA (By similarity).                      |
| N | Q5SHG2 | DE | ACCase subunit beta;                                                                                                                                                                                                                 |
| N | Q5SHG2 | DE | Acetyl-CoA carboxylase carboxyltransferase subunit beta;                                                                                                                                                                             |
| N | Q5SHG2 | DE | Acetyl-coenzyme A carboxylase carboxyl transferase subunit beta;                                                                                                                                                                     |
| N | Q5SHG2 | DR | acetyl-CoA carboxylase activity                                                                                                                                                                                                      |
| N | Q5SHG2 | DR | fatty acid biosynthetic process                                                                                                                                                                                                      |
| N | Q5SHG2 | DR | metal ion binding                                                                                                                                                                                                                    |
| N | Q5SLS1 | CC | Plays an important role in the de novo pathway of purine nucleotide biosynthesis                                                                                                                                                     |
| N | Q5SLS1 | CC | Catalyzes the first committed step in the biosynthesis of AMP from IMP (By similarity)                                                                                                                                               |
| N | Q5SLS1 | DE | Adenylosuccinate synthetase;                                                                                                                                                                                                         |
| N | Q5SLS1 | DE | IMP--aspartate ligase;                                                                                                                                                                                                               |
| N | Q5SLS1 | DR | adenylosuccinate synthase activity                                                                                                                                                                                                   |
| N | Q5SLS1 | DR | magnesium ion binding                                                                                                                                                                                                                |
| N | Q5SLS1 | DR | purine nucleotide biosynthetic process                                                                                                                                                                                               |
| N | Q5SV42 | CC | Regulates the activity of the neutrophil proteases (By similarity).                                                                                                                                                                  |
| N | Q5SV42 | DE | Leukocyte elastase inhibitor C;                                                                                                                                                                                                      |
| N | Q5SV42 | DE | Serine protease inhibitor EIC;                                                                                                                                                                                                       |
| N | Q5SV42 | DR | serine-type endopeptidase inhibitor activity                                                                                                                                                                                         |
| N | Q5SYB0 | CC | Stabilizes membrane-bound GEFM1, and thereby promotes its interaction with GNAI1                                                                                                                                                     |
| N | Q5SYB0 | DE | FERM and PDZ domain-containing protein 1;                                                                                                                                                                                            |
| N | Q5SYB0 | DE | FERM domain-containing protein 2;                                                                                                                                                                                                    |
| N | Q5T230 | CC | Acts as a transcriptional coactivator of ATF2.                                                                                                                                                                                       |
| N | Q5T230 | DE | Undifferentiated embryonic cell transcription factor 1;                                                                                                                                                                              |
| N | Q5T230 | DR | RNA polymerase II transcription factor activity                                                                                                                                                                                      |
| N | Q5T230 | DR | male gonad development                                                                                                                                                                                                               |
| N | Q5T230 | DR | positive regulation of transcription from RNA polymerase II promoter                                                                                                                                                                 |
| N | Q5T230 | DR | protein binding                                                                                                                                                                                                                      |
| N | Q5T230 | DR | transcription coactivator activity                                                                                                                                                                                                   |
| N | Q5T7P6 | DE | Transmembrane protein 78;                                                                                                                                                                                                            |
| N | Q5T9G4 | DE | Uncharacterized protein C6orf81;                                                                                                                                                                                                     |
| N | Q5TBC7 | DE | Bcl-2-like protein 15;                                                                                                                                                                                                               |
| N | Q5U2V9 | DE | Transmembrane protein 39A;                                                                                                                                                                                                           |
| N | Q5U7I5 | CC | Thyroid hormone-binding protein                                                                                                                                                                                                      |
| N | Q5U7I5 | CC | Probably transports thyroxine from the bloodstream to the brain (By similarity).                                                                                                                                                     |
| N | Q5U7I5 | DE | Transthyretin;                                                                                                                                                                                                                       |
| N | Q5U7I5 | DR | hormone activity                                                                                                                                                                                                                     |
| N | Q5UP83 | DE | Putative Kila-N domain-containing protein L4;                                                                                                                                                                                        |
| N | Q5UPE0 | DE | Uncharacterized protein L65;                                                                                                                                                                                                         |
| N | Q5UPX7 | CC | DNA-dependent RNA polymerase catalyzes the transcription of DNA into RNA using the four ribonucleoside triphosphates as substrates (By similarity).                                                                                  |
| N | Q5UPX7 | DE | DNA-directed RNA polymerase subunit 5;                                                                                                                                                                                               |
| N | Q5UPX7 | DR | DNA-directed RNA polymerase activity                                                                                                                                                                                                 |
| N | Q5UPZ5 | DE | Uncharacterized protein L309;                                                                                                                                                                                                        |
| N | Q5UQK8 | DE | Uncharacterized protein L412;                                                                                                                                                                                                        |
| N | Q5UQK8 | DR | nucleic acid binding                                                                                                                                                                                                                 |
| N | Q5UQK8 | DR | zinc ion binding                                                                                                                                                                                                                     |
| N | Q5UQU8 | DE | Uncharacterized protein L357;                                                                                                                                                                                                        |
| N | Q5UQU8 | DE | Catalyzes the radical-mediated transfer of the hydroxybenzyl group from 4-hydroxyphenylpyruvate (HPP) to 5-amino- 6-ribitylamino-2,4(1H,3H)-pyrimidinedione to form 7,8-didemethyl- 8-hydroxy-5-deazariboflavin (FO) (By similarity) |
| N | Q5UXN1 | CC |                                                                                                                                                                                                                                      |

|   |        |    |                                                                                                                                                                                                                  |
|---|--------|----|------------------------------------------------------------------------------------------------------------------------------------------------------------------------------------------------------------------|
| N | Q5UXN1 | DE | 7,8-didemethyl-8-hydroxy-5-deazariboflavin synthase subunit 2;                                                                                                                                                   |
| N | Q5UXN1 | DE | FO synthase subunit 2;                                                                                                                                                                                           |
| N | Q5UXN1 | DR | 4 iron, 4 sulfur cluster binding                                                                                                                                                                                 |
| N | Q5UXN1 | DR | metal ion binding                                                                                                                                                                                                |
| N | Q5UXN1 | DR | transferase activity, transferring alkyl or aryl (other than methyl) groups                                                                                                                                      |
| N | Q5VU97 | CC | May regulate voltage-dependent calcium channels (By similarity).                                                                                                                                                 |
| N | Q5VU97 | DE | Cache domain-containing protein 1;                                                                                                                                                                               |
| N | Q5VU97 | DE | VWFA and cache domain-containing protein 1;                                                                                                                                                                      |
| N | Q5VU97 | DR | calcium ion transport                                                                                                                                                                                            |
| N | Q5WFK7 | CC | modifies the free amino group of the aminoacyl moiety of methionyl-tRNA (EMBL)                                                                                                                                   |
| N | Q5WFK7 | CC | The formyl group appears to play a dual role in the initiator identity of N-formylmethionyl-tRNA by: (I) promoting its recognition by IF2 and (II) impairing its binding to EFTu-GTP (By similarity).            |
| N | Q5WFK7 | DE | Methionyl-tRNA formyltransferase;                                                                                                                                                                                |
| N | Q5WFK7 | DR | methionyl-tRNA formyltransferase activity                                                                                                                                                                        |
| N | Q5WFK7 | DR | methyltransferase activity                                                                                                                                                                                       |
| N | Q5WFX1 | CC | Can catalyze the hydrolysis of ATP in the presence of single-stranded DNA, the ATP-dependent uptake of single-stranded DNA by duplex DNA, and the ATP-dependent hybridization of homologous single-stranded DNAs |
| N | Q5WFX1 | CC | It interacts with LexA causing its activation and leading to its autocatalytic cleavage (By similarity).                                                                                                         |
| N | Q5WFX1 | DE | Protein RecA;                                                                                                                                                                                                    |
| N | Q5WFX1 | DE | Recombinase A;                                                                                                                                                                                                   |
| N | Q5WFX1 | DR | DNA recombination                                                                                                                                                                                                |
| N | Q5WFX1 | DR | DNA-dependent ATPase activity                                                                                                                                                                                    |
| N | Q5WFX1 | DR | single-stranded DNA binding                                                                                                                                                                                      |
| N | Q5WGA5 | CC | Catalyzes the pyruvoyl-dependent decarboxylation of aspartate to produce beta-alanine (By similarity).                                                                                                           |
| N | Q5WGA5 | DE | Aspartate 1-decarboxylase alpha chain;                                                                                                                                                                           |
| N | Q5WGA5 | DE | Aspartate 1-decarboxylase beta chain;                                                                                                                                                                            |
| N | Q5WGA5 | DE | Aspartate 1-decarboxylase;                                                                                                                                                                                       |
| N | Q5WGA5 | DE | Aspartate alpha-decarboxylase;                                                                                                                                                                                   |
| N | Q5WGA5 | DR | alanine biosynthetic process                                                                                                                                                                                     |
| N | Q5WGA5 | DR | aspartate 1-decarboxylase activity                                                                                                                                                                               |
| N | Q5WGA5 | DR | pantothenate biosynthetic process                                                                                                                                                                                |
| N | Q5WQ00 | CC | This protein is essential for plasmid replication; it is involved in copy control functions (By similarity).                                                                                                     |
| N | Q5WQ00 | DE | Probable replication-associated protein repA1;                                                                                                                                                                   |
| N | Q5WQ00 | DR | DNA replication                                                                                                                                                                                                  |
| N | Q5WQ00 | DR | plasmid maintenance                                                                                                                                                                                              |
| N | Q5WXF0 | CC | Part of the ABC transporter complex PotABCD involved in spermidine/putrescine import                                                                                                                             |
| N | Q5WXF0 | CC | Responsible for energy coupling to the transport system (By similarity).                                                                                                                                         |
| N | Q5WXF0 | DE | Spermidine/putrescine import ATP-binding protein PotA;                                                                                                                                                           |
| N | Q5WXF0 | DR | polyamine-transporting ATPase activity                                                                                                                                                                           |
| N | Q5X3K0 | CC | Catalyzes the 1,3-allylic rearrangement of the homoallylic substrate isopentenyl (IPP) to its allylic isomer, dimethylallyl diphosphate (DMAPP) (By similarity).                                                 |
| N | Q5X3K0 | DE | IPP isomerase;                                                                                                                                                                                                   |
| N | Q5X3K0 | DE | Isopentenyl pyrophosphate isomerase;                                                                                                                                                                             |
| N | Q5X3K0 | DE | Isopentenyl-diphosphate delta-isomerase;                                                                                                                                                                         |
| N | Q5X3K0 | DR | isopentenyl-diphosphate delta-isomerase activity                                                                                                                                                                 |
| N | Q5X3K0 | DR | isoprenoid biosynthetic process                                                                                                                                                                                  |
| N | Q5X3K0 | DR | oxidoreductase activity                                                                                                                                                                                          |
| N | Q5XA26 | CC | required for the formation of a threonylcarbamoyl group on adenosine at position 37 (t(6)A37) in tRNAs that read codons beginning with adenine (By similarity)                                                   |
| N | Q5XA26 | DE | Probable tRNA threonylcarbamoyladenine biosynthesis protein Gcp;                                                                                                                                                 |
| N | Q5XA26 | DE | t(6)A37 threonylcarbamoyladenine biosynthesis protein;                                                                                                                                                           |
| N | Q5XA26 | DR | metal ion binding                                                                                                                                                                                                |
| N | Q5XA26 | DR | metalloendopeptidase activity                                                                                                                                                                                    |
| N | Q5XAP1 | CC | Essential for recycling GMP and indirectly, cGMP (By similarity).                                                                                                                                                |
| N | Q5XAP1 | DE | Guanylate kinase;                                                                                                                                                                                                |
| N | Q5XAP1 | DR | guanylate kinase activity                                                                                                                                                                                        |
| N | Q5XAP1 | DR | purine nucleotide metabolic process                                                                                                                                                                              |
| N | Q5XCA6 | DE | 2-amino-4-hydroxy-6-hydroxymethyl-dihydropteridine pyrophosphokinase;                                                                                                                                            |
| N | Q5XCA6 | DE | 6-hydroxymethyl-7,8-dihydropterin pyrophosphokinase;                                                                                                                                                             |

|   |        |    |                                                                                                                                                                                                                        |
|---|--------|----|------------------------------------------------------------------------------------------------------------------------------------------------------------------------------------------------------------------------|
| N | Q5XCA6 | DE | 7,8-dihydro-6-hydroxymethylpterin-pyrophosphokinase;                                                                                                                                                                   |
| N | Q5XCA6 | DR | 2-amino-4-hydroxy-6-hydroxymethyldihydropteridine diphosphokinase activity                                                                                                                                             |
| N | Q5XCA6 | DR | folic acid biosynthetic process                                                                                                                                                                                        |
| N | Q5XCA6 | DR | kinase activity                                                                                                                                                                                                        |
| N | Q5XFN2 | CC | Desmin are class-III intermediate filaments found in muscle cells in adult striated muscle they form a fibrous network connecting myofibrils to each other and to the plasma membrane from the periphery of the Z-line |
| N | Q5XFN2 | DR | structural molecule activity                                                                                                                                                                                           |
| N | Q5XGY9 | CC | Required for proper homologous chromosome pairing and efficient cross-over and intragenic recombination during meiosis                                                                                                 |
| N | Q5XGY9 | CC | Stimulates both dmc1- and rad51-mediated homologous strand assimilation, which is required for the resolution of meiotic double-strand breaks (By similarity)                                                          |
| N | Q5XGY9 | DE | Meiotic nuclear division protein 1 homolog;                                                                                                                                                                            |
| N | Q5XGY9 | DR | DNA recombination                                                                                                                                                                                                      |
| N | Q5XH36 | CC | Possible role in neuronal acetylcholine receptor transport (By similarity).                                                                                                                                            |
| N | Q5XH36 | DE | Cysteine-rich with EGF-like domain protein 2-A;                                                                                                                                                                        |
| N | Q5XH36 | DR | calcium ion binding                                                                                                                                                                                                    |
| N | Q5XIF4 | CC | Ubiquitin-like protein which can be covalently attached to target lysines either as a monomer or as a lysine-linked polymer                                                                                            |
| N | Q5XIF4 | CC | Covalent attachment to its substrates requires prior activation by the E1 complex SAE1-SAE2 and linkage to the E2 enzyme UBE2I, and can be promoted by an E3 ligase such as PIAS1-4, RANBP2 or CBX4 (By similarity).   |
| N | Q5XIF4 | CC | Does not seem to be involved in protein degradation and may function as an antagonist of ubiquitin in the degradation process                                                                                          |
| N | Q5XIF4 | CC | Plays a role in a number of cellular processes such as nuclear transport, DNA replication and repair, mitosis and signal transduction                                                                                  |
| N | Q5XIF4 | DE | Small ubiquitin-related modifier 3;                                                                                                                                                                                    |
| N | Q5XIP1 | CC | Required for normal chromosome segregation during cell division and genomic stability (By similarity)                                                                                                                  |
| N | Q5XIP1 | CC | May function in recognizing stalled ribosomes and triggering endonucleolytic cleavage of the mRNA, a mechanism to release non-functional ribosomes and degrade damaged mRNAs                                           |
| N | Q5XIP1 | CC | May have ribonuclease activity (Potential).                                                                                                                                                                            |
| N | Q5XIP1 | DE | Protein pelota homolog;                                                                                                                                                                                                |
| N | Q5XIP1 | DR | cell division                                                                                                                                                                                                          |
| N | Q5XIP1 | DR | endonuclease activity                                                                                                                                                                                                  |
| N | Q5XIP1 | DR | metal ion binding                                                                                                                                                                                                      |
| N | Q5Y4X0 | CC | Insect active toxin causing rapid but reversible paralysis in crickets                                                                                                                                                 |
| N | Q5Y4X0 | CC | Does not show effect on mammalian voltage-gated calcium channels (By similarity)                                                                                                                                       |
| N | Q5Y4X0 | CC | No activity shown in mammals                                                                                                                                                                                           |
| N | Q5Y4X0 | DE | U2-AGTX-Ao1p;                                                                                                                                                                                                          |
| N | Q5Y4X0 | DE | U2-agatoxin-Ao1p;                                                                                                                                                                                                      |
| N | Q5YJU0 | CC | Usually encoded in the trnK tRNA gene intron                                                                                                                                                                           |
| N | Q5YJU0 | CC | probably assists in splicing its own and other chloroplast group II introns (By similarity)                                                                                                                            |
| N | Q5YJU0 | DE | Intron maturase;                                                                                                                                                                                                       |
| N | Q5YJU0 | DR | mRNA processing                                                                                                                                                                                                        |
| N | Q5YJU0 | DR | tRNA processing                                                                                                                                                                                                        |
| N | Q5YNA5 | CC | Catalyzes the formation of N(7)-methylguanine at position 46 (m7G46) in tRNA (By similarity).                                                                                                                          |
| N | Q5YNA5 | DE | tRNA (guanine-N(7)-)-methyltransferase;                                                                                                                                                                                |
| N | Q5YNA5 | DE | tRNA(m7G46)-methyltransferase;                                                                                                                                                                                         |
| N | Q5YNA5 | DR | tRNA (guanine-N7-)-methyltransferase activity                                                                                                                                                                          |
| N | Q5YS38 | CC | Specifically methylates guanosine-37 in various tRNAs (By similarity).                                                                                                                                                 |
| N | Q5YS38 | DE | M1G-methyltransferase;                                                                                                                                                                                                 |
| N | Q5YS38 | DE | tRNA (guanine-N(1)-)-methyltransferase;                                                                                                                                                                                |
| N | Q5YS38 | DE | tRNA [GM37] methyltransferase;                                                                                                                                                                                         |
| N | Q5YS38 | DR | tRNA (guanine-N1-)-methyltransferase activity                                                                                                                                                                          |
| N | Q5ZID0 | CC | Redox sensor protein                                                                                                                                                                                                   |
| N | Q5ZID0 | CC | Undergoes restructuring and subcellular redistribution in response to changes in intracellular NADPH/NADP(+) levels (By similarity).                                                                                   |
| N | Q5ZID0 | DE | NmrA-like family domain-containing protein 1;                                                                                                                                                                          |
| N | Q5ZID0 | DR | catalytic activity                                                                                                                                                                                                     |
| N | Q5ZJL4 | CC | Polynucleotide kinase that can phosphorylate the 5'- hydroxyl groups of double-stranded RNA (dsRNA), single-stranded RNA (ssRNA), double stranded DNA (dsDNA) and double-stranded DNA:RNA hybrids                      |

|   |        |    |                                                                                                                                                                                                                                                                                                |
|---|--------|----|------------------------------------------------------------------------------------------------------------------------------------------------------------------------------------------------------------------------------------------------------------------------------------------------|
| N | Q5ZJL4 | CC | Also phosphorylates the 5'-terminus of exogenously introduced short interfering RNAs (siRNAs), which is a necessary prerequisite for their incorporation into the RNA- induced silencing complex (RISC)                                                                                        |
| N | Q5ZJL4 | CC | Appears to have roles in both tRNA splicing and mRNA 3'-end formation                                                                                                                                                                                                                          |
| N | Q5ZJL4 | CC | Component of the pre-mRNA cleavage complex II (CF-II), which seems to be required for mRNA 3'-end formation                                                                                                                                                                                    |
| N | Q5ZJL4 | CC | Component of the tRNA splicing endonuclease complex                                                                                                                                                                                                                                            |
| N | Q5ZJL4 | CC | However endogenous siRNAs and microRNAs (miRNAs) that are produced by the cleavage of dsRNA precursors by DICER1 already contain a 5'-phosphate group, so this protein may be dispensible for normal RNA-mediated gene silencing (By similarity)                                               |
| N | Q5ZJL4 | CC | Phosphorylates the 5'-terminus of the tRNA 3'-exon during tRNA splicing; this phosphorylation event is a prerequisite for the subsequent ligation of the two exon halves and the production of a mature tRNA                                                                                   |
| N | Q5ZJL4 | CC | ASKNA is phosphorylated more efficiently than ASBNA, and the RNA component of a DNA:RNA hybrid is phosphorylated more efficiently than the DNA component                                                                                                                                       |
| N | Q5ZJL4 | DE | Polynucleotide kinase Clp1;                                                                                                                                                                                                                                                                    |
| N | Q5ZJL4 | DE | Polyribonucleotide 5'-hydroxyl-kinase Clp1;                                                                                                                                                                                                                                                    |
| N | Q5ZJL4 | DE | Pre-mRNA cleavage complex II protein Clp1;                                                                                                                                                                                                                                                     |
| N | Q5ZJL4 | DR | ATP-dependent polydeoxyribonucleotide 5'-hydroxyl-kinase activity                                                                                                                                                                                                                              |
| N | Q5ZJL4 | DR | ATP-dependent polyribonucleotide 5'-hydroxyl-kinase activity                                                                                                                                                                                                                                   |
| N | Q5ZJL4 | DR | mRNA processing                                                                                                                                                                                                                                                                                |
| N | Q5ZJL4 | DR | siRNA loading onto RISC involved in RNA interference                                                                                                                                                                                                                                           |
| N | Q5ZJL4 | DR | tRNA splicing, via endonucleolytic cleavage and ligation                                                                                                                                                                                                                                       |
| N | Q5ZJL4 | DR | targeting of mRNA for destruction involved in RNA interference                                                                                                                                                                                                                                 |
| N | Q5ZL55 | CC | Probable core component of the endosomal sorting required for transport complex III (ESCRT-III) which is involved in multivesicular bodies (MVBs) formation and sorting of endosomal cargo proteins into MVBs                                                                                  |
| N | Q5ZL55 | CC | In the ESCRT-III complex, it probably serves as an acceptor for the ESCRT-II complex on endosomal membranes (By similarity).                                                                                                                                                                   |
| N | Q5ZL55 | CC | MVBs contain intraluminal vesicles (ILVs) that are generated by invagination and scission from the limiting membrane of the endosome and mostly are delivered to lysosomes enabling degradation of membrane proteins, such as stimulated growth factor receptors, lysosomal enzymes and lipids |
| N | Q5ZL55 | DE | Charged multivesicular body protein 6;                                                                                                                                                                                                                                                         |
| N | Q5ZL55 | DE | Chromatin-modifying protein 6;                                                                                                                                                                                                                                                                 |
| N | Q5ZL55 | DR | protein transport                                                                                                                                                                                                                                                                              |
| N | Q5ZLC7 | CC | May be involved in microtubule polymerization, and spindle function by stabilizing microtubules and anchoring them at centrosomes (By similarity).                                                                                                                                             |
| N | Q5ZLC7 | DE | Microtubule-associated protein RP/EB family member 1;                                                                                                                                                                                                                                          |
| N | Q5ZLC7 | DR | cell division                                                                                                                                                                                                                                                                                  |
| N | Q5ZLC7 | DR | microtubule plus-end binding                                                                                                                                                                                                                                                                   |
| N | Q5ZLC7 | DR | negative regulation of microtubule polymerization                                                                                                                                                                                                                                              |
| N | Q5ZLC7 | DR | protein localization to microtubule                                                                                                                                                                                                                                                            |
| N | Q5ZM25 | CC | Hydrolyzes ATP, and can also hydrolyze GTP with lower efficiency                                                                                                                                                                                                                               |
| N | Q5ZM25 | CC | Has lower affinity for GTP (By similarity).                                                                                                                                                                                                                                                    |
| N | Q5ZM25 | DE | Obg-like ATPase 1;                                                                                                                                                                                                                                                                             |
| N | Q5ZM25 | DR | hydrolase activity                                                                                                                                                                                                                                                                             |
| N | Q5ZM73 | CC | Mitochondrial GTPase involved in mitochondrial trafficking                                                                                                                                                                                                                                     |
| N | Q5ZM73 | CC | Probably involved in control of anterograde transport of mitochondria and their subcellular distribution (By similarity).                                                                                                                                                                      |
| N | Q5ZM73 | DE | Mitochondrial Rho GTPase 1;                                                                                                                                                                                                                                                                    |
| N | Q5ZM73 | DE | Ras homolog gene family member T1;                                                                                                                                                                                                                                                             |
| N | Q5ZM73 | DR | calcium ion binding                                                                                                                                                                                                                                                                            |
| N | Q5ZM73 | DR | cellular homeostasis                                                                                                                                                                                                                                                                           |
| N | Q5ZM73 | DR | hydrolase activity                                                                                                                                                                                                                                                                             |
| N | Q5ZM73 | DR | mitochondrion transport along microtubule                                                                                                                                                                                                                                                      |
| N | Q5ZM73 | DR | small GTPase mediated signal transduction                                                                                                                                                                                                                                                      |
| N | Q5ZWN7 | CC | produces ATP from ADP in the presence of a proton gradient across the membrane                                                                                                                                                                                                                 |
| N | Q5ZWN7 | CC | The alpha chain is a regulatory subunit (By similarity).                                                                                                                                                                                                                                       |
| N | Q5ZWN7 | DE | ATP synthase F1 sector subunit alpha 1;                                                                                                                                                                                                                                                        |
| N | Q5ZWN7 | DE | ATP synthase subunit alpha 1;                                                                                                                                                                                                                                                                  |
| N | Q5ZWN7 | DE | F-ATPase subunit alpha 1;                                                                                                                                                                                                                                                                      |
| N | Q5ZWN7 | DR | ATP hydrolysis coupled proton transport                                                                                                                                                                                                                                                        |
| N | Q5ZWN7 | DR | ATP synthesis coupled proton transport                                                                                                                                                                                                                                                         |
| N | Q5ZWN7 | DR | hydrogen ion transporting ATP synthase activity, rotational mechanism                                                                                                                                                                                                                          |

|   |        |    |                                                                                                                                                               |
|---|--------|----|---------------------------------------------------------------------------------------------------------------------------------------------------------------|
| N | Q5ZWN7 | DR | proton-transporting ATPase activity, rotational mechanism                                                                                                     |
| N | Q5ZX60 | CC | Increases the formation of ribosomal termination complexes and stimulates activities of RF-1 and RF-2                                                         |
| N | Q5ZX60 | CC | It binds guanine nucleotides and has strong preference for UGA stop codons                                                                                    |
| N | Q5ZX60 | CC | It may interact directly with the ribosome                                                                                                                    |
| N | Q5ZX60 | CC | The stimulation of RF- 1 and RF-2 is significantly reduced by GTP and GDP, but not by GMP (By similarity).                                                    |
| N | Q5ZX60 | DE | Peptide chain release factor 3;                                                                                                                               |
| N | Q5ZX60 | DR | GTPase activity                                                                                                                                               |
| N | Q5ZX60 | DR | translation release factor activity, codon specific                                                                                                           |
| N | Q5ZYQ1 | CC | Seems to be the binding site for several of the factors involved in protein synthesis and appears to be essential for accurate translation (By similarity).   |
| N | Q5ZYQ1 | DE | 50S ribosomal protein L7/L12;                                                                                                                                 |
| N | Q5ZYQ1 | DR | structural constituent of ribosome                                                                                                                            |
| N | Q600A8 | DE | Glucose-6-phosphate isomerase;                                                                                                                                |
| N | Q600A8 | DE | Phosphoglucose isomerase;                                                                                                                                     |
| N | Q600A8 | DE | Phosphohexose isomerase;                                                                                                                                      |
| N | Q600A8 | DR | gluconeogenesis                                                                                                                                               |
| N | Q600A8 | DR | glucose-6-phosphate isomerase activity                                                                                                                        |
| N | Q601J0 | CC | Located on the platform of the 30S subunit, it bridges several disparate RNA helices of the 16S rRNA                                                          |
| N | Q601J0 | CC | Forms part of the Shine-Dalgarno cleft in the 70S ribosome (By similarity).                                                                                   |
| N | Q601J0 | DE | 30S ribosomal protein S11;                                                                                                                                    |
| N | Q601J0 | DR | structural constituent of ribosome                                                                                                                            |
| N | Q60276 | DE | Uncharacterized protein MJECL14;                                                                                                                              |
| N | Q605D1 | CC | Binds to the 23S rRNA (By similarity).                                                                                                                        |
| N | Q605D1 | DE | 50S ribosomal protein L15;                                                                                                                                    |
| N | Q605D1 | DR | structural constituent of ribosome                                                                                                                            |
| N | Q606K9 | DE | Maf-like protein MCA2007;                                                                                                                                     |
| N | Q60841 | CC | Extracellular matrix serine protease that plays a role in layering of neurons in the cerebral cortex and cerebellum                                           |
| N | Q60841 | CC | Affects migration of sympathetic preganglionic neurons in the spinal cord, where it seems to act as a barrier to neuronal migration                           |
| N | Q60841 | CC | Binding to the extracellular domains of lipoprotein receptors VLDLR and ApoER2 induces tyrosine phosphorylation of Dab1 and modulation of Tau phosphorylation |
| N | Q60841 | CC | Enzymatic activity is important for the modulation of cell adhesion                                                                                           |
| N | Q60841 | CC | Regulates microtubule function in neurons and neuronal migration                                                                                              |
| N | Q60841 | DE | Reeler protein;                                                                                                                                               |
| N | Q60841 | DR | axon guidance                                                                                                                                                 |
| N | Q60841 | DR | cell adhesion                                                                                                                                                 |
| N | Q60841 | DR | cerebral cortex tangential migration                                                                                                                          |
| N | Q60841 | DR | dendrite development                                                                                                                                          |
| N | Q60841 | DR | glial cell differentiation                                                                                                                                    |
| N | Q60841 | DR | metal ion binding                                                                                                                                             |
| N | Q60841 | DR | neuron migration                                                                                                                                              |
| N | Q60841 | DR | peptidyl-tyrosine phosphorylation                                                                                                                             |
| N | Q60841 | DR | positive regulation of protein kinase activity                                                                                                                |
| N | Q60841 | DR | positive regulation of small GTPase mediated signal transduction                                                                                              |
| N | Q60841 | DR | protein serine/threonine/tyrosine kinase activity                                                                                                             |
| N | Q60841 | DR | response to pain                                                                                                                                              |
| N | Q60841 | DR | serine-type peptidase activity                                                                                                                                |
| N | Q60841 | DR | spinal cord patterning                                                                                                                                        |
| N | Q61062 | CC | may play a role in the signal transduction pathway mediated by multiple wnt receptors                                                                         |
| N | Q61062 | DE | DSH homolog 3;                                                                                                                                                |
| N | Q61062 | DE | Dishevelled-3;                                                                                                                                                |
| N | Q61062 | DE | Segment polarity protein dishevelled homolog DVL-3;                                                                                                           |
| N | Q61062 | DR | cochlea morphogenesis                                                                                                                                         |
| N | Q61062 | DR | intracellular signal transduction                                                                                                                             |
| N | Q61062 | DR | outflow tract septum morphogenesis                                                                                                                            |
| N | Q61062 | DR | planar cell polarity pathway involved in neural tube closure                                                                                                  |
| N | Q61062 | DR | signal transducer activity                                                                                                                                    |
| N | Q61194 | CC | Phosphorylates PtdIns, PtdIns4P and PtdIns(4,5)P2                                                                                                             |
| N | Q61194 | CC | May be a downstream effector in insulin signaling cascade.                                                                                                    |
| N | Q61194 | CC | May be involved in mitosis and UV-induced damage response (By similarity)                                                                                     |
| N | Q61194 | CC | may play a role in clathrin-coated endocytic vesicle formation and EGF signaling cascade                                                                      |

|   |        |    |                                                                                                                                                                                                                                                                   |
|---|--------|----|-------------------------------------------------------------------------------------------------------------------------------------------------------------------------------------------------------------------------------------------------------------------|
| N | Q61194 | DE | PI3K-C2-alpha;                                                                                                                                                                                                                                                    |
| N | Q61194 | DE | Phosphatidylinositol-4-phosphate 3-kinase C2 domain-containing subunit alpha;                                                                                                                                                                                     |
| N | Q61194 | DE | Phosphoinositide 3-kinase-C2-alpha;                                                                                                                                                                                                                               |
| N | Q61194 | DE | PtdIns-3-kinase C2 subunit alpha;                                                                                                                                                                                                                                 |
| N | Q61194 | DR | 1-phosphatidylinositol-3-kinase activity                                                                                                                                                                                                                          |
| N | Q61194 | DR | cell communication                                                                                                                                                                                                                                                |
| N | Q61194 | DR | phosphatidylinositol binding                                                                                                                                                                                                                                      |
| N | Q61194 | DR | phosphatidylinositol-4-phosphate 3-kinase activity                                                                                                                                                                                                                |
| N | Q61194 | DR | phosphatidylinositol-mediated signaling                                                                                                                                                                                                                           |
| N | Q61458 | CC | Regulates CDK7, the catalytic subunit of the CDK- activating kinase (CAK) enzymatic complex                                                                                                                                                                       |
| N | Q61458 | CC | CAK activates the cyclin-associated kinases CDK1, CDK2, CDK4 and CDK6 by threonine phosphorylation                                                                                                                                                                |
| N | Q61458 | CC | CAK complexed to the core-TFIIF basal transcription factor activates RNA polymerase II by serine phosphorylation of the repetitive C-terminus domain (CTD) of its large subunit (POLR2A), allowing its escape from the promoter and elongation of the transcripts |
| N | Q61458 | CC | Involved in cell cycle control and in RNA transcription by RNA polymerase II                                                                                                                                                                                      |
| N | Q61458 | CC | Its expression and activity are constant throughout the cell cycle.                                                                                                                                                                                               |
| N | Q61458 | DR | transcription from RNA polymerase II promoter                                                                                                                                                                                                                     |
| N | Q61R02 | CC | Probable ATP-binding RNA helicase.                                                                                                                                                                                                                                |
| N | Q61R02 | DE | DEAD box protein 55;                                                                                                                                                                                                                                              |
| N | Q61R02 | DE | Probable ATP-dependent RNA helicase DDX55 homolog;                                                                                                                                                                                                                |
| N | Q61R02 | DR | ATP-dependent helicase activity                                                                                                                                                                                                                                   |
| N | Q626H5 | CC | Involved as a receptor for mab-20/sema-2a in the formation or stabilization of cell-cell contacts at several stages of epithelial morphogenesis                                                                                                                   |
| N | Q626H5 | CC | During male tail morphogenesis, involved in precursor cell sorting and in the formation of distinct sensory rays (By similarity).                                                                                                                                 |
| N | Q626H5 | CC | in early embryonic development, required for proper ventral closure of the notochord                                                                                                                                                                              |
| N | Q626H5 | DR | cell differentiation                                                                                                                                                                                                                                              |
| N | Q626H5 | DR | multicellular organismal development                                                                                                                                                                                                                              |
| N | Q626H5 | DR | receptor activity                                                                                                                                                                                                                                                 |
| N | Q62909 | CC | Promotes ATP-dependent removal of tubulin dimers from microtubules                                                                                                                                                                                                |
| N | Q62909 | CC | Regulates the turnover of microtubules at the kinetochore and functions in chromosome segregation during mitosis (By similarity).                                                                                                                                 |
| N | Q62909 | DE | Kinesin-like protein KIF2C;                                                                                                                                                                                                                                       |
| N | Q62909 | DE | Kinesin-related protein 2;                                                                                                                                                                                                                                        |
| N | Q62909 | DE | Mitotic centromere-associated kinesin;                                                                                                                                                                                                                            |
| N | Q62909 | DR | cell division                                                                                                                                                                                                                                                     |
| N | Q62909 | DR | chromosome segregation                                                                                                                                                                                                                                            |
| N | Q62909 | DR | microtubule motor activity                                                                                                                                                                                                                                        |
| N | Q62909 | DR | microtubule plus-end binding                                                                                                                                                                                                                                      |
| N | Q62909 | DR | microtubule-based movement                                                                                                                                                                                                                                        |
| N | Q62J08 | CC | Catalyzes the ATP-dependent amination of UTP to CTP with either L-glutamine or ammonia as the source of nitrogen (By similarity).                                                                                                                                 |
| N | Q62J08 | DE | CTP synthase;                                                                                                                                                                                                                                                     |
| N | Q62J08 | DE | CTP synthetase;                                                                                                                                                                                                                                                   |
| N | Q62J08 | DE | UTP--ammonia ligase;                                                                                                                                                                                                                                              |
| N | Q62J08 | DR | CTP synthase activity                                                                                                                                                                                                                                             |
| N | Q62J08 | DR | glutamine metabolic process                                                                                                                                                                                                                                       |
| N | Q62J08 | DR | pyrimidine nucleotide biosynthetic process                                                                                                                                                                                                                        |
| N | Q62LW6 | CC | Multidrug efflux pump (By similarity).                                                                                                                                                                                                                            |
| N | Q62LW6 | DE | Multidrug-efflux transporter;                                                                                                                                                                                                                                     |
| N | Q62LW6 | DE | Probable multidrug resistance protein norM;                                                                                                                                                                                                                       |
| N | Q62LW6 | DR | antiporter activity                                                                                                                                                                                                                                               |
| N | Q62LW6 | DR | drug transmembrane transporter activity                                                                                                                                                                                                                           |
| N | Q62LW6 | DR | ion transport                                                                                                                                                                                                                                                     |
| N | Q62MR4 | CC | Furnishes a means for formation of correctly charged Gln-tRNA(Gln) through the transamidation of misacylated Glu- tRNA(Gln) in organisms which lack glutaminyl-tRNA synthetase                                                                                    |
| N | Q62MR4 | CC | The reaction takes place in the presence of glutamine and ATP through an activated gamma-phospho-Glu-tRNA(Gln) (By similarity).                                                                                                                                   |
| N | Q62MR4 | DE | Glu-ADT subunit A;                                                                                                                                                                                                                                                |
| N | Q62MR4 | DE | Glutamyl-tRNA(Gln) amidotransferase subunit A;                                                                                                                                                                                                                    |
| N | Q62MR4 | DR | carbon-nitrogen ligase activity, with glutamine as amido-N-donor                                                                                                                                                                                                  |

|   |        |    |                                                                                                                                                                                                       |
|---|--------|----|-------------------------------------------------------------------------------------------------------------------------------------------------------------------------------------------------------|
| N | Q635P2 | CC | Dephosphorylates 2-hydroxy-3-keto-5-methylthiopentenyl-1-phosphate (HK-MTPenyl-1-P) yielding 1,2-dihydroxy-3-keto-5-methylthiopentene (DHK-MTP <sub>Dana</sub> ) (By similarity).                     |
| N | Q635P2 | DE | 2-hydroxy-3-keto-5-methylthiopentenyl-1-phosphate phosphatase;                                                                                                                                        |
| N | Q635P2 | DE | HK-MTPenyl-1-P phosphatase;                                                                                                                                                                           |
| N | Q635P2 | DR | L-methionine salvage                                                                                                                                                                                  |
| N | Q635P2 | DR | phosphatase activity                                                                                                                                                                                  |
| N | Q635S6 | CC | Catalyzes the transfer of a methyl group from 5-methyltetrahydrofolate to homocysteine resulting in methionine formation (By similarity).                                                             |
| N | Q635S6 | DE | 5-methyltetrahydropteroyltriglutamate--homocysteine methyltransferase;                                                                                                                                |
| N | Q635S6 | DE | Cobalamin-independent methionine synthase;                                                                                                                                                            |
| N | Q635S6 | DE | Methionine synthase, vitamin-B12 independent isozyme;                                                                                                                                                 |
| N | Q635S6 | DR | 5-methyltetrahydropteroyltriglutamate-homocysteine S-methyltransferase activity                                                                                                                       |
| N | Q635S6 | DR | methionine biosynthetic process                                                                                                                                                                       |
| N | Q635S6 | DR | zinc ion binding                                                                                                                                                                                      |
| N | Q63802 | CC | May act as a negative regulator of entry into mitosis (G2 to M transition) by protecting the nucleus from cytoplasmically activated cyclin B1-complexed CDK1 before the onset of mitosis              |
| N | Q63802 | CC | A correlated decrease in protein level occurs at M/G1 phase, probably due to its degradation                                                                                                          |
| N | Q63802 | CC | Its activity increases during S and G2 phases and decreases at M phase when it is hyperphosphorylated                                                                                                 |
| N | Q63802 | CC | Phosphorylation of cyclin B1-CDK1 occurs exclusively on 'Tyr-15' and phosphorylation of monomeric CDK1 does not occur (By similarity).                                                                |
| N | Q63802 | CC | Specifically phosphorylates and inactivates cyclin B1-complexed CDK1 reaching a maximum during G2 phase and a minimum as cells enter M phase                                                          |
| N | Q63802 | DE | Wee1-like protein kinase;                                                                                                                                                                             |
| N | Q63802 | DE | Wee1A kinase;                                                                                                                                                                                         |
| N | Q63802 | DR | cell division                                                                                                                                                                                         |
| N | Q63802 | DR | magnesium ion binding                                                                                                                                                                                 |
| N | Q63802 | DR | non-membrane spanning protein tyrosine kinase activity                                                                                                                                                |
| N | Q63802 | DR | protein phosphorylation                                                                                                                                                                               |
| N | Q63802 | DR | protein serine/threonine kinase activity                                                                                                                                                              |
| N | Q63CR4 | DE | UPF0291 protein BCE33L1708;                                                                                                                                                                           |
| N | Q63GI2 | CC | Catalyzes the attachment of proline to tRNA(Pro) in a two-step reaction: proline is first activated by ATP to form Pro-AMP and then transferred to the acceptor end of tRNA(Pro) (By similarity).     |
| N | Q63GI2 | DE | Proline--tRNA ligase 2;                                                                                                                                                                               |
| N | Q63GI2 | DE | Prolyl-tRNA synthetase 2;                                                                                                                                                                             |
| N | Q63GI2 | DR | proline-tRNA ligase activity                                                                                                                                                                          |
| N | Q63GI2 | DR | prolyl-tRNA aminoacylation                                                                                                                                                                            |
| N | Q63S99 | CC | Transfers the 4'-phosphopantetheine moiety from coenzyme A to a Ser of acyl-carrier-protein (By similarity).                                                                                          |
| N | Q63S99 | DE | 4'-phosphopantetheinyl transferase AcpS;                                                                                                                                                              |
| N | Q63S99 | DE | Holo-ACP synthase;                                                                                                                                                                                    |
| N | Q63S99 | DE | Holo-[acyl-carrier-protein] synthase;                                                                                                                                                                 |
| N | Q63S99 | DR | fatty acid biosynthetic process                                                                                                                                                                       |
| N | Q63S99 | DR | holo-[acyl-carrier-protein] synthase activity                                                                                                                                                         |
| N | Q63S99 | DR | macromolecule biosynthetic process                                                                                                                                                                    |
| N | Q63S99 | DR | magnesium ion binding                                                                                                                                                                                 |
| N | Q63SP8 | CC | Catalyzes the ATP-dependent amination of UTP to CTP with either L-glutamine or ammonia as the source of nitrogen (By similarity).                                                                     |
| N | Q63SP8 | DE | CTP synthase;                                                                                                                                                                                         |
| N | Q63SP8 | DE | CTP synthetase;                                                                                                                                                                                       |
| N | Q63SP8 | DE | UTP--ammonia ligase;                                                                                                                                                                                  |
| N | Q63SP8 | DR | CTP synthase activity                                                                                                                                                                                 |
| N | Q63SP8 | DR | glutamine metabolic process                                                                                                                                                                           |
| N | Q63SP8 | DR | pyrimidine nucleotide biosynthetic process                                                                                                                                                            |
| N | Q63SX4 | CC | Catalyzes the attachment of glutamate to tRNA(Glu) in a two-step reaction: glutamate is first activated by ATP to form Glu-AMP and then transferred to the acceptor end of tRNA(Glu) (By similarity). |
| N | Q63SX4 | DE | Glutamate--tRNA ligase;                                                                                                                                                                               |
| N | Q63SX4 | DE | Glutamyl-tRNA synthetase;                                                                                                                                                                             |
| N | Q63SX4 | DR | glutamate-tRNA ligase activity                                                                                                                                                                        |
| N | Q63SX4 | DR | glutamyl-tRNA aminoacylation                                                                                                                                                                          |
| N | Q63V40 | CC | ATP-dependent specificity component of the Clp protease                                                                                                                                               |



|   |        |    |                                                                                                                                                                                                   |
|---|--------|----|---------------------------------------------------------------------------------------------------------------------------------------------------------------------------------------------------|
| N | Q63V40 | CC | Can perform chaperone functions in the absence of ClpP (By similarity).                                                                                                                           |
| N | Q63V40 | CC | It directs the protease to specific substrates                                                                                                                                                    |
| N | Q63V40 | DE | ATP-dependent Clp protease ATP-binding subunit ClpX;                                                                                                                                              |
| N | Q63V40 | DR | ATPase activity                                                                                                                                                                                   |
| N | Q63V40 | DR | protein dimerization activity                                                                                                                                                                     |
| N | Q63V40 | DR | protein folding                                                                                                                                                                                   |
| N | Q63V40 | DR | unfolded protein binding                                                                                                                                                                          |
| N | Q63V40 | DR | zinc ion binding                                                                                                                                                                                  |
| N | Q64261 | CC | Probably involved in the control of the cell cycle                                                                                                                                                |
| N | Q64261 | CC | Interacts with D-type G1 cyclins (By similarity).                                                                                                                                                 |
| N | Q64261 | DE | Cell division protein kinase 6;                                                                                                                                                                   |
| N | Q64261 | DE | Cyclin-dependent kinase 6;                                                                                                                                                                        |
| N | Q64261 | DE | Serine/threonine-protein kinase PLSTIRE;                                                                                                                                                          |
| N | Q64261 | DR | cell division                                                                                                                                                                                     |
| N | Q64261 | DR | cyclin-dependent protein kinase activity                                                                                                                                                          |
| N | Q64261 | DR | protein phosphorylation                                                                                                                                                                           |
| N | Q64408 | CC | Has steroid 11-beta-hydroxylase activity<br>in addition to this activity, the 18 or 19-hydroxylation of steroids and the<br>aromatization of androstendione to estrone have also been ascribed to |
| N | Q64408 | CC | Cytochrome P450 XTP                                                                                                                                                                               |
| N | Q64408 | DE | Aldosterone synthase;                                                                                                                                                                             |
| N | Q64408 | DE | Cytochrome P450 11B1, mitochondrial;                                                                                                                                                              |
| N | Q64408 | DE | Cytochrome P450C11;                                                                                                                                                                               |
| N | Q64408 | DE | Steroid 11-beta-hydroxylase;                                                                                                                                                                      |
| N | Q64408 | DR | electron carrier activity                                                                                                                                                                         |
| N | Q64408 | DR | oxidation-reduction process                                                                                                                                                                       |
| N | Q64408 | DR | steroid 11-beta-monooxygenase activity                                                                                                                                                            |
| N | Q64408 | DR | steroid biosynthetic process                                                                                                                                                                      |
| N | Q64437 | CC | Could function in retinol oxidation for the synthesis of retinoic acid, a hormone<br>important for cellular differentiation.                                                                      |
| N | Q64437 | DE | Alcohol dehydrogenase 7;                                                                                                                                                                          |
| N | Q64437 | DE | Alcohol dehydrogenase class 4 mu/sigma chain;                                                                                                                                                     |
| N | Q64437 | DE | Alcohol dehydrogenase class IV mu/sigma chain;                                                                                                                                                    |
| N | Q64437 | DE | Gastric alcohol dehydrogenase;                                                                                                                                                                    |
| N | Q64437 | DE | Retinol dehydrogenase;                                                                                                                                                                            |
| N | Q64437 | DR | ethanol catabolic process                                                                                                                                                                         |
| N | Q64437 | DR | retinoic acid metabolic process                                                                                                                                                                   |
| N | Q64437 | DR | retinol dehydrogenase activity                                                                                                                                                                    |
| N | Q64437 | DR | retinol metabolic process                                                                                                                                                                         |
| N | Q64475 | CC | Core component of nucleosome                                                                                                                                                                      |
| N | Q64475 | CC | DNA accessibility is regulated via a complex set of post-translational<br>modifications of histones, also called histone code, and nucleosome remodeling.                                         |
| N | Q64475 | CC | Histones thereby play a central role in transcription regulation, DNA repair, DNA<br>replication and chromosomal stability                                                                        |
| N | Q64475 | CC | Nucleosomes wrap and compact DNA into chromatin, limiting DNA accessibility<br>to the cellular machineries which require DNA as a template                                                        |
| N | Q64475 | DE | Histone H2B type 1-B;                                                                                                                                                                             |
| N | Q64475 | DR | nucleosome assembly                                                                                                                                                                               |
| N | Q64525 | CC | Core component of nucleosome                                                                                                                                                                      |
| N | Q64525 | CC | DNA accessibility is regulated via a complex set of post-translational<br>modifications of histones, also called histone code, and nucleosome remodeling.                                         |
| N | Q64525 | CC | Histones thereby play a central role in transcription regulation, DNA repair, DNA<br>replication and chromosomal stability                                                                        |
| N | Q64525 | CC | Nucleosomes wrap and compact DNA into chromatin, limiting DNA accessibility<br>to the cellular machineries which require DNA as a template                                                        |
| N | Q64525 | DE | Histone H2B type 2-B;                                                                                                                                                                             |
| N | Q64525 | DR | nucleosome assembly                                                                                                                                                                               |
| N | Q645T6 | CC | Receptor that may play a role in the perception of bitterness and is gustducin-<br>linked                                                                                                         |
| N | Q645T6 | CC | may play a role in sensing the chemical composition of the gastrointestinal<br>content                                                                                                            |
| N | Q645T6 | CC | The activity of this receptor may stimulate alpha gustducin, mediate PLC-beta-2<br>activation and lead to the gating of TRPM5 (By similarity).                                                    |
| N | Q645T6 | DE | Taste receptor type 2 member 50;                                                                                                                                                                  |
| N | Q645T6 | DR | G-protein coupled receptor activity                                                                                                                                                               |
| N | Q645T6 | DR | sensory perception of taste                                                                                                                                                                       |
| N | Q645Y8 | CC | Gustducin-coupled receptor implicated in the perception of bitter compounds in<br>the oral cavity and the gastrointestinal tract                                                                  |

|   |        |    |                                                                                                                                                                                                                                                      |
|---|--------|----|------------------------------------------------------------------------------------------------------------------------------------------------------------------------------------------------------------------------------------------------------|
| N | Q645Y8 | CC | In airway epithelial cells, binding of denatonium increases the intracellular calcium ion concentration and stimulates ciliary beat frequency (By similarity). Signals through rLCB2 and the calcium-regulated cation channel TRPM5 (By similarity). |
| N | Q645Y8 | CC |                                                                                                                                                                                                                                                      |
| N | Q645Y8 | DE | Taste receptor type 2 member 4;                                                                                                                                                                                                                      |
| N | Q645Y8 | DR | G-protein coupled receptor activity                                                                                                                                                                                                                  |
| N | Q645Y8 | DR | sensory perception of taste                                                                                                                                                                                                                          |
| N | Q64634 | CC | UDPGT is of major importance in the conjugation and subsequent elimination of potentially toxic xenobiotics and endogenous compounds.                                                                                                                |
| N | Q64634 | DE | UDP-glucuronosyltransferase 1-8;                                                                                                                                                                                                                     |
| N | Q64634 | DR | 4-chlorobiphenyl metabolic process                                                                                                                                                                                                                   |
| N | Q64634 | DR | bilirubin conjugation                                                                                                                                                                                                                                |
| N | Q64634 | DR | biphenyl catabolic process                                                                                                                                                                                                                           |
| N | Q64634 | DR | cellular response to ethanol                                                                                                                                                                                                                         |
| N | Q64634 | DR | cellular response to glucocorticoid stimulus                                                                                                                                                                                                         |
| N | Q64634 | DR | cellular response to organic cyclic compound                                                                                                                                                                                                         |
| N | Q64634 | DR | coumarin catabolic process                                                                                                                                                                                                                           |
| N | Q64634 | DR | enzyme binding                                                                                                                                                                                                                                       |
| N | Q64634 | DR | estrogen catabolic process                                                                                                                                                                                                                           |
| N | Q64634 | DR | glucuronosyltransferase activity                                                                                                                                                                                                                     |
| N | Q64634 | DR | liver development                                                                                                                                                                                                                                    |
| N | Q64634 | DR | organ regeneration                                                                                                                                                                                                                                   |
| N | Q64634 | DR | protein glucuronidation                                                                                                                                                                                                                              |
| N | Q64634 | DR | response to drug                                                                                                                                                                                                                                     |
| N | Q64634 | DR | response to lipopolysaccharide                                                                                                                                                                                                                       |
| N | Q64634 | DR | response to nutrient                                                                                                                                                                                                                                 |
| N | Q64634 | DR | response to peptide hormone stimulus                                                                                                                                                                                                                 |
| N | Q64634 | DR | response to starvation                                                                                                                                                                                                                               |
| N | Q64770 | CC | Early protein essential for viral replication                                                                                                                                                                                                        |
| N | Q64770 | CC | Activates transcription by blocking host retinoblastoma protein (RB) and inhibiting the SUMO pathway                                                                                                                                                 |
| N | Q64770 | CC | Blocks the SUMO pathway by targeting the E1 enzyme (SAE1/UBA2 heterodimer) to the ubiquitin-proteasome machinery                                                                                                                                     |
| N | Q64770 | CC | Inhibition of host RB leads to the activation of E2F1-dependent transcription and, in particular, of E2F1-regulated S-phase genes                                                                                                                    |
| N | Q64770 | CC | Inhibits HDAC1 sumoylation, thereby interfering with histone deacetylation mediated by HDAC1, leading to activation of transcription                                                                                                                 |
| N | Q64770 | CC | Mediates SAE1 degradation possibly through the formation of complexes with either CUL2-elongin BC complex-RBX1 or CUL5-elongin BC complex-RBX1                                                                                                       |
| N | Q64770 | CC | Mediates induction of heat-shock response                                                                                                                                                                                                            |
| N | Q64770 | CC | Seems to have an antiapoptotic function.                                                                                                                                                                                                             |
| N | Q64770 | CC | Stimulation of progression from G1 to S phase allows the virus to efficiently use the cellular DNA replicating machinery to achieve viral genome replication                                                                                         |
| N | Q64770 | CC | Strong and global transcriptional activator of both viral and cellular genes                                                                                                                                                                         |
| N | Q64770 | CC | The degradation of UBA2 is probably a consequent effect of SAE1 transactivation                                                                                                                                                                      |
| N | Q64770 | DE | Gallus-anti morte protein;                                                                                                                                                                                                                           |
| N | Q64770 | DE | Protein GAM-1;                                                                                                                                                                                                                                       |
| N | Q64770 | DR | interspecies interaction between organisms                                                                                                                                                                                                           |
| N | Q64LH1 | CC | Binds to actin and affects the structure of the cytoskeleton                                                                                                                                                                                         |
| N | Q64LH1 | CC | At high concentrations, profilin prevents the polymerization of actin, whereas it enhances it at low concentrations                                                                                                                                  |
| N | Q64LH1 | CC | By binding to PIP2, it inhibits the formation of IP3 and DG (By similarity).                                                                                                                                                                         |
| N | Q64LH1 | DE | Amb a 8;                                                                                                                                                                                                                                             |
| N | Q64LH1 | DE | Pollen allergen Amb a 8;                                                                                                                                                                                                                             |
| N | Q64LH1 | DR | actin binding                                                                                                                                                                                                                                        |
| N | Q64LH1 | DR | actin cytoskeleton organization                                                                                                                                                                                                                      |
| N | Q64NF1 | DE | Insertion sequence IS21-like putative ATP-binding protein;                                                                                                                                                                                           |
| N | Q64NF1 | DR | regulation of transcription, DNA-dependent                                                                                                                                                                                                           |
| N | Q64NF1 | DR | transcription factor binding                                                                                                                                                                                                                         |
| N | Q64PM4 | DE | Asparagine synthetase A;                                                                                                                                                                                                                             |
| N | Q64PM4 | DE | Aspartate--ammonia ligase;                                                                                                                                                                                                                           |
| N | Q64PM4 | DR | aminoacyl-tRNA ligase activity                                                                                                                                                                                                                       |
| N | Q64PM4 | DR | asparagine biosynthetic process                                                                                                                                                                                                                      |
| N | Q64PM4 | DR | aspartate-ammonia ligase activity                                                                                                                                                                                                                    |
| N | Q64PM4 | DR | tRNA aminoacylation for protein translation                                                                                                                                                                                                          |
| N | Q64TK0 | DE | CinA-like protein;                                                                                                                                                                                                                                   |

|   |        |    |                                                                                                                                                                                 |
|---|--------|----|---------------------------------------------------------------------------------------------------------------------------------------------------------------------------------|
| N | Q64TK0 | DR | Mo-molybdopterin cofactor biosynthetic process                                                                                                                                  |
| N | Q64VI6 | CC | Participates actively in the response to hyperosmotic and heat shock by preventing the aggregation of stress-denatured proteins, in association with dnaK and grpE              |
| N | Q64VI6 | CC | GrpE releases ADP from dnaK; ATP binding to dnaK triggers the release of the substrate protein, thus completing the reaction cycle                                              |
| N | Q64VI6 | CC | It is the nucleotide exchange factor for dnaK and may function as a thermosensor                                                                                                |
| N | Q64VI6 | CC | Several rounds of ATP- dependent interactions between dnaJ, dnaK and grpE are required for fully efficient folding (By similarity).                                             |
| N | Q64VI6 | CC | Unfolded proteins bind initially to dnaJ; upon interaction with the dnaJ-bound protein, dnaK hydrolyzes its bound ATP, resulting in the formation of a stable complex           |
| N | Q64VI6 | DE | HSP-70 cofactor;                                                                                                                                                                |
| N | Q64VI6 | DE | Protein grpE;                                                                                                                                                                   |
| N | Q64VI6 | DR | adenyl-nucleotide exchange factor activity                                                                                                                                      |
| N | Q64VI6 | DR | chaperone binding                                                                                                                                                               |
| N | Q64VI6 | DR | protein folding                                                                                                                                                                 |
| N | Q64VI6 | DR | protein homodimerization activity                                                                                                                                               |
| N | Q64VI6 | DR | response to stress                                                                                                                                                              |
| N | Q64WC2 | CC | Catalyzes the oxidation of either pyridoxine 5'-phosphate (PNP) or pyridoxamine 5'-phosphate (PMP) into pyridoxal 5'-phosphate (PLP) (By similarity)                            |
| N | Q64WC2 | DE | PNP/PMP oxidase;                                                                                                                                                                |
| N | Q64WC2 | DE | Pyridoxal 5'-phosphate synthase;                                                                                                                                                |
| N | Q64WC2 | DE | Pyridoxine/pyridoxamine 5'-phosphate oxidase;                                                                                                                                   |
| N | Q64WC2 | DR | oxidation-reduction process                                                                                                                                                     |
| N | Q64WC2 | DR | pyridoxamine-phosphate oxidase activity                                                                                                                                         |
| N | Q64WC2 | DR | pyridoxine biosynthetic process                                                                                                                                                 |
| N | Q650H8 | CC | Hydrolyzes D-tyrosyl-tRNA(Tyr) into D-tyrosine and free tRNA(Tyr)                                                                                                               |
| N | Q650H8 | CC | Could be a defense mechanism against a harmful effect of D-tyrosine (By similarity)                                                                                             |
| N | Q650H8 | DE | D-tyrosyl-tRNA(Tyr) deacylase;                                                                                                                                                  |
| N | Q650H8 | DR | D-amino acid catabolic process                                                                                                                                                  |
| N | Q650H8 | DR | hydrolase activity, acting on ester bonds                                                                                                                                       |
| N | Q65139 | DE | Uncharacterized protein A118R;                                                                                                                                                  |
| N | Q65192 | DE | NifS-like protein;                                                                                                                                                              |
| N | Q65192 | DR | catalytic activity                                                                                                                                                              |
| N | Q65192 | DR | pyridoxal phosphate binding                                                                                                                                                     |
| N | Q65729 | CC | Nuclear inclusion protein B is a RNA-dependent RNA polymerase that plays an essential role in the virus replication (By similarity).                                            |
| N | Q65729 | DE | 49 kDa proteinase;                                                                                                                                                              |
| N | Q65729 | DE | 49 kDa-Pro;                                                                                                                                                                     |
| N | Q65729 | DE | Capsid protein;                                                                                                                                                                 |
| N | Q65729 | DE | Coat protein;                                                                                                                                                                   |
| N | Q65729 | DE | Genome polyprotein;                                                                                                                                                             |
| N | Q65729 | DE | Nuclear inclusion protein A;                                                                                                                                                    |
| N | Q65729 | DE | Nuclear inclusion protein B;                                                                                                                                                    |
| N | Q65729 | DE | RNA-directed RNA polymerase;                                                                                                                                                    |
| N | Q65729 | DR | RNA-directed RNA polymerase activity                                                                                                                                            |
| N | Q65729 | DR | cysteine-type peptidase activity                                                                                                                                                |
| N | Q65729 | DR | nucleotide binding                                                                                                                                                              |
| N | Q65729 | DR | viral genome replication                                                                                                                                                        |
| N | Q65QT7 | CC | Involved in the transport of maltose and maltodextrins (By similarity).                                                                                                         |
| N | Q65QT7 | DE | Maltose-inducible porin;                                                                                                                                                        |
| N | Q65QT7 | DR | porin activity                                                                                                                                                                  |
| N | Q65QT7 | DR | sugar:hydrogen symporter activity                                                                                                                                               |
| N | Q65R93 | DE | UPF0352 protein MS1910;                                                                                                                                                         |
| N | Q65RC3 | CC | Catalyzes the conversion of uracil and 5-phospho-alpha- D-ribose 1-diphosphate (PRPP) to UMP and diphosphate (By similarity).                                                   |
| N | Q65RC3 | DE | UMP pyrophosphorylase;                                                                                                                                                          |
| N | Q65RC3 | DE | Uracil phosphoribosyltransferase;                                                                                                                                               |
| N | Q65RC3 | DR | nucleoside metabolic process                                                                                                                                                    |
| N | Q65RC3 | DR | uracil phosphoribosyltransferase activity                                                                                                                                       |
| N | Q65RC3 | DR | uracil salvage                                                                                                                                                                  |
| N | Q65S59 | CC | An essential GTPase which binds GTP, GDP and possibly (p)ppGpp with moderate affinity, with high nucleotide exchange rates and a fairly low GTP hydrolysis rate (By similarity) |
| N | Q65S59 | CC | It may play a role in control of the cell cycle, stress response, ribosome biogenesis and in those bacteria that undergo differentiation, in morphogenesis control (Potential)  |

|   |        |    |                                                                                                                                                                                                               |
|---|--------|----|---------------------------------------------------------------------------------------------------------------------------------------------------------------------------------------------------------------|
| N | Q65S59 | DE | GTP-binding protein obg;                                                                                                                                                                                      |
| N | Q65S59 | DR | GTPase activity                                                                                                                                                                                               |
| N | Q65S59 | DR | magnesium ion binding                                                                                                                                                                                         |
| N | Q65SS8 | CC | Negatively regulates transcription of bacterial ribonucleotide reductase nrd genes and operons by binding to NrdR- boxes (By similarity).                                                                     |
| N | Q65SS8 | DE | Transcriptional repressor NrdR;                                                                                                                                                                               |
| N | Q65SS8 | DR | transcription repressor activity                                                                                                                                                                              |
| N | Q65SS8 | DR | zinc ion binding                                                                                                                                                                                              |
| N | Q65UK6 | CC | Specifically methylates the guanosine in position 2445 (m2G2445) of 23S rRNA (By similarity).                                                                                                                 |
| N | Q65UK6 | DE | 23S rRNA m2G2445 methyltransferase;                                                                                                                                                                           |
| N | Q65UK6 | DE | Ribosomal RNA large subunit methyltransferase L;                                                                                                                                                              |
| N | Q65UK6 | DE | rRNA (guanine-N(2)-)-methyltransferase rmlL;                                                                                                                                                                  |
| N | Q65UK6 | DR | rRNA (guanine-N2-)-methyltransferase activity                                                                                                                                                                 |
| N | Q65UP1 | CC | The ruvA-ruvB complex in the presence of ATP renatures cruciform structure in supercoiled DNA with palindromic sequence, indicating that it may promote strand exchange reactions in homologous recombination |
| N | Q65UP1 | CC | RuvA stimulates, in the presence of DNA, the weak ATPase activity of ruvB (By similarity).                                                                                                                    |
| N | Q65UP1 | CC | RuvAB is an helicase that mediates the Holliday junction migration by localized denaturation and reannealing                                                                                                  |
| N | Q65UP1 | DE | Holliday junction ATP-dependent DNA helicase ruvA;                                                                                                                                                            |
| N | Q65UP1 | DR | DNA recombination                                                                                                                                                                                             |
| N | Q65UP1 | DR | four-way junction helicase activity                                                                                                                                                                           |
| N | Q660T5 | CC | is required not only for elongation of protein synthesis but also for the initiation of all mRNA translation through initiator tRNA(fMet) aminoacylation (By similarity)                                      |
| N | Q660T5 | DE | Methionine--tRNA ligase;                                                                                                                                                                                      |
| N | Q660T5 | DE | Methionyl-tRNA synthetase;                                                                                                                                                                                    |
| N | Q660T5 | DR | metal ion binding                                                                                                                                                                                             |
| N | Q660T5 | DR | methionine-tRNA ligase activity                                                                                                                                                                               |
| N | Q660T5 | DR | methionyl-tRNA aminoacylation                                                                                                                                                                                 |
| N | Q66117 | CC | RNA-dependent RNA polymerase which replicates the viral genome composed of 3 RNA segments, RNA1, RNA2 and RNA3 (Potential).                                                                                   |
| N | Q66117 | DE | RNA-directed RNA polymerase 2a;                                                                                                                                                                               |
| N | Q66117 | DE | protein 2a;                                                                                                                                                                                                   |
| N | Q66117 | DR | RNA-directed RNA polymerase activity                                                                                                                                                                          |
| N | Q66117 | DR | nucleotide binding                                                                                                                                                                                            |
| N | Q66117 | DR | viral genome replication                                                                                                                                                                                      |
| N | Q661F0 | CC | This protein specifically catalyzes the removal of signal peptides from prolipoproteins (By similarity).                                                                                                      |
| N | Q661F0 | DE | Lipoprotein signal peptidase;                                                                                                                                                                                 |
| N | Q661F0 | DE | Prolipoprotein signal peptidase;                                                                                                                                                                              |
| N | Q661F0 | DE | Signal peptidase II;                                                                                                                                                                                          |
| N | Q661F0 | DR | aspartic-type endopeptidase activity                                                                                                                                                                          |
| N | Q661P9 | CC | Catalyzes the attachment of tyrosine to tRNA(Tyr) in a two-step reaction: tyrosine is first activated by ATP to form Tyr- AMP and then transferred to the acceptor end of tRNA(Tyr) (By similarity).          |
| N | Q661P9 | DE | Tyrosine--tRNA ligase;                                                                                                                                                                                        |
| N | Q661P9 | DE | Tyrosyl-tRNA synthetase;                                                                                                                                                                                      |
| N | Q661P9 | DR | tyrosine-tRNA ligase activity                                                                                                                                                                                 |
| N | Q661P9 | DR | tyrosyl-tRNA aminoacylation                                                                                                                                                                                   |
| N | Q662P0 | CC | Associates with the EF-Tu.GDP complex and induces the exchange of GDP to GTP                                                                                                                                  |
| N | Q662P0 | CC | It remains bound to the aminoacyl-tRNA.EF- Tu.GTP complex up to the GTP hydrolysis stage on the ribosome.                                                                                                     |
| N | Q662P0 | DE | Elongation factor Ts;                                                                                                                                                                                         |
| N | Q662P0 | DR | translation elongation factor activity                                                                                                                                                                        |
| N | Q66647 | CC | This protein may be an helicase and is required for replication of viral DNA (By similarity).                                                                                                                 |
| N | Q66647 | DE | Probable ATP-dependent helicase 44;                                                                                                                                                                           |
| N | Q66647 | DR | DNA replication                                                                                                                                                                                               |
| N | Q66647 | DR | helicase activity                                                                                                                                                                                             |
| N | Q66647 | DR | viral genome replication                                                                                                                                                                                      |
| N | Q66AS1 | CC | Prevents the cell division inhibition by proteins minC and minD at internal division sites while permitting inhibition at polar sites                                                                         |

|   |        |    |                                                                                                                                                                                                                                                                                                                                           |
|---|--------|----|-------------------------------------------------------------------------------------------------------------------------------------------------------------------------------------------------------------------------------------------------------------------------------------------------------------------------------------------|
| N | Q66AS1 | CC | This ensures cell division at the proper site by restricting the formation of a division septum at the midpoint of the long axis of the cell (By similarity).                                                                                                                                                                             |
| N | Q66AS1 | DE | Cell division topological specificity factor;                                                                                                                                                                                                                                                                                             |
| N | Q66AS1 | DR | cell division                                                                                                                                                                                                                                                                                                                             |
| N | Q66AS1 | DR | regulation of barrier septum formation                                                                                                                                                                                                                                                                                                    |
| N | Q66H24 | DE | Uncharacterized protein C9orf40 homolog;                                                                                                                                                                                                                                                                                                  |
| N | Q66HC7 | CC | Required for MAP kinase p38 (MAPK11, MAPK12, MAPK13 and/or MAPK14) activation during gastrulation                                                                                                                                                                                                                                         |
| N | Q66HC7 | CC | Required for down- regulation of E-cadherin during gastrulation by regulating E-cadherin protein level downstream from NCK-interacting kinase (NIK) and independently of the regulation of transcription by Fgf signaling and Snail required for starvation-induced ATG9A trafficking during autophagy (By similarity)                    |
| N | Q66HC7 | CC | Protein FAM48A;                                                                                                                                                                                                                                                                                                                           |
| N | Q66HC7 | DE |                                                                                                                                                                                                                                                                                                                                           |
| N | Q66HE2 | CC | Proton-linked monocarboxylate transporter                                                                                                                                                                                                                                                                                                 |
| N | Q66HE2 | CC | Catalyzes the rapid transport across the plasma membrane of many monocarboxylates (By similarity).                                                                                                                                                                                                                                        |
| N | Q66HE2 | DE | Monocarboxylate transporter 13;                                                                                                                                                                                                                                                                                                           |
| N | Q66HE2 | DE | Solute carrier family 16 member 13;                                                                                                                                                                                                                                                                                                       |
| N | Q66HE2 | DR | symporter activity                                                                                                                                                                                                                                                                                                                        |
| N | Q66I12 | DE | Coiled-coil domain-containing protein 47;                                                                                                                                                                                                                                                                                                 |
| N | Q66J36 | CC | May act as a transcriptional regulator of a number of proteins of the circadian clock (By similarity).                                                                                                                                                                                                                                    |
| N | Q66J36 | DE | Nuclear factor interleukin-3-regulated protein;                                                                                                                                                                                                                                                                                           |
| N | Q66J36 | DR | circadian rhythm                                                                                                                                                                                                                                                                                                                          |
| N | Q66J36 | DR | protein dimerization activity                                                                                                                                                                                                                                                                                                             |
| N | Q66J36 | DR | regulation of transcription, DNA-dependent                                                                                                                                                                                                                                                                                                |
| N | Q66J36 | DR | sequence-specific DNA binding                                                                                                                                                                                                                                                                                                             |
| N | Q66J36 | DR | sequence-specific DNA binding transcription factor activity                                                                                                                                                                                                                                                                               |
| N | Q66J36 | DR | transcription regulator activity                                                                                                                                                                                                                                                                                                          |
| N | Q67HX4 | DE | Protein psbN;                                                                                                                                                                                                                                                                                                                             |
| N | Q67HX4 | DR | photosynthesis                                                                                                                                                                                                                                                                                                                            |
| N | Q67N73 | CC | DNA polymerase involved in damage-induced mutagenesis and translesion synthesis (TLS)                                                                                                                                                                                                                                                     |
| N | Q67N73 | CC | It is not the major replicative DNA polymerase (By similarity).                                                                                                                                                                                                                                                                           |
| N | Q67N73 | DE | Error-prone DNA polymerase;                                                                                                                                                                                                                                                                                                               |
| N | Q67N73 | DR | 3'-5' exonuclease activity                                                                                                                                                                                                                                                                                                                |
| N | Q67N73 | DR | DNA replication                                                                                                                                                                                                                                                                                                                           |
| N | Q67N73 | DR | DNA-directed DNA polymerase activity                                                                                                                                                                                                                                                                                                      |
| N | Q67Q99 | CC | Nuclease that resolves Holliday junction intermediates in genetic recombination Cleaves the cruciform structure in supercoiled DNA by nicking to strands with the same polarity at sites symmetrically opposed at the junction in the homologous arms and leaves a 5'-terminal phosphate and a 3'-terminal hydroxyl group (By similarity) |
| N | Q67Q99 | CC |                                                                                                                                                                                                                                                                                                                                           |
| N | Q67Q99 | DE | Crossover junction endodeoxyribonuclease ruvC;                                                                                                                                                                                                                                                                                            |
| N | Q67Q99 | DE | Holliday junction nuclease ruvC;                                                                                                                                                                                                                                                                                                          |
| N | Q67Q99 | DE | Holliday junction resolvase ruvC;                                                                                                                                                                                                                                                                                                         |
| N | Q67Q99 | DR | DNA recombination                                                                                                                                                                                                                                                                                                                         |
| N | Q67Q99 | DR | crossover junction endodeoxyribonuclease activity                                                                                                                                                                                                                                                                                         |
| N | Q67Q99 | DR | metal ion binding                                                                                                                                                                                                                                                                                                                         |
| N | Q67Q99 | DR | nucleic acid binding                                                                                                                                                                                                                                                                                                                      |
| N | Q67QZ4 | CC | Cleaves peptides in various proteins in a process that requires ATP hydrolysis                                                                                                                                                                                                                                                            |
| N | Q67QZ4 | CC | Has a chymotrypsin-like activity                                                                                                                                                                                                                                                                                                          |
| N | Q67QZ4 | CC | Plays a major role in the degradation of misfolded proteins (By similarity).                                                                                                                                                                                                                                                              |
| N | Q67QZ4 | DE | ATP-dependent Clp protease proteolytic subunit 2;                                                                                                                                                                                                                                                                                         |
| N | Q67QZ4 | DE | Endopeptidase Clp 2;                                                                                                                                                                                                                                                                                                                      |
| N | Q67QZ4 | DR | serine-type endopeptidase activity                                                                                                                                                                                                                                                                                                        |
| N | Q67SJ9 | CC | ATP-dependent specificity component of the Clp protease                                                                                                                                                                                                                                                                                   |
| N | Q67SJ9 | CC | Can perform chaperone functions in the absence of ClpP (By similarity).                                                                                                                                                                                                                                                                   |
| N | Q67SJ9 | CC | It directs the protease to specific substrates                                                                                                                                                                                                                                                                                            |
| N | Q67SJ9 | DE | ATP-dependent Clp protease ATP-binding subunit ClpX;                                                                                                                                                                                                                                                                                      |
| N | Q67SJ9 | DR | ATPase activity                                                                                                                                                                                                                                                                                                                           |
| N | Q67SJ9 | DR | protein dimerization activity                                                                                                                                                                                                                                                                                                             |
| N | Q67SJ9 | DR | protein folding                                                                                                                                                                                                                                                                                                                           |
| N | Q67SJ9 | DR | unfolded protein binding                                                                                                                                                                                                                                                                                                                  |
| N | Q67SJ9 | DR | zinc ion binding                                                                                                                                                                                                                                                                                                                          |

|   |        |    |                                                                                                                                                                                                                           |
|---|--------|----|---------------------------------------------------------------------------------------------------------------------------------------------------------------------------------------------------------------------------|
| N | Q67XZ3 | CC | 6-fructan exohydrolase that can use phlein, levan, neokestose, levanbiose, 6-kestose, and 1-kestose as substrates.                                                                                                        |
| N | Q67XZ3 | DE | 6-fructan exohydrolase;                                                                                                                                                                                                   |
| N | Q67XZ3 | DE | Beta-fructofuranosidase 5;                                                                                                                                                                                                |
| N | Q67XZ3 | DE | Beta-fructofuranosidase, insoluble isoenzyme CWINV3;                                                                                                                                                                      |
| N | Q67XZ3 | DE | Cell wall beta-fructosidase 3;                                                                                                                                                                                            |
| N | Q67XZ3 | DE | Cell wall invertase 3;                                                                                                                                                                                                    |
| N | Q67XZ3 | DE | Sucrose hydrolase 3;                                                                                                                                                                                                      |
| N | Q67XZ3 | DR | carbohydrate metabolic process                                                                                                                                                                                            |
| N | Q67XZ3 | DR | fructan beta-fructosidase activity                                                                                                                                                                                        |
| N | Q67YC0 | CC | Catalyzes the specific cleavage of pyrophosphate.                                                                                                                                                                         |
| N | Q67YC0 | DE | AtPPsPase1;                                                                                                                                                                                                               |
| N | Q67YC0 | DE | Inorganic pyrophosphatase 1;                                                                                                                                                                                              |
| N | Q67YC0 | DE | PPi phosphatase 1;                                                                                                                                                                                                        |
| N | Q67YC0 | DE | Protein PHOSPHATE STARVATION-INDUCED GENE 2;                                                                                                                                                                              |
| N | Q67YC0 | DE | Pyrophosphate-specific phosphatase 1;                                                                                                                                                                                     |
| N | Q67YC0 | DR | cellular response to phosphate starvation                                                                                                                                                                                 |
| N | Q67YC0 | DR | inorganic diphosphatase activity                                                                                                                                                                                          |
| N | Q67YC0 | DR | metal ion binding                                                                                                                                                                                                         |
| N | Q67YC0 | DR | phosphatase activity                                                                                                                                                                                                      |
| N | Q67YC0 | DR | protein tetramerization                                                                                                                                                                                                   |
| N | Q68WD3 | CC | This is one of the proteins that binds to the 5S RNA in the ribosome where it forms part of the central protuberance (By similarity).                                                                                     |
| N | Q68WD3 | DE | 50S ribosomal protein L25;                                                                                                                                                                                                |
| N | Q68WD3 | DE | General stress protein CTC;                                                                                                                                                                                               |
| N | Q68WD3 | DR | 5S rRNA binding                                                                                                                                                                                                           |
| N | Q68WD3 | DR | structural constituent of ribosome                                                                                                                                                                                        |
| N | Q68WK6 | CC | The pyruvate dehydrogenase complex catalyzes the overall conversion of pyruvate to acetyl-CoA and CO(2)                                                                                                                   |
| N | Q68WK6 | CC | It contains multiple copies of three enzymatic components: pyruvate dehydrogenase (E1), dihydrolipoamide acetyltransferase (E2) and lipoamide dehydrogenase (E3) (By similarity).                                         |
| N | Q68WK6 | DE | Dihydrolipoamide acetyltransferase component of pyruvate dehydrogenase complex;                                                                                                                                           |
| N | Q68WK6 | DE | Dihydrolipoyllysine-residue acetyltransferase component of pyruvate dehydrogenase complex;                                                                                                                                |
| N | Q68WK6 | DR | dihydrolipoyllysine-residue acetyltransferase activity                                                                                                                                                                    |
| N | Q68WK6 | DR | pyruvate metabolic process                                                                                                                                                                                                |
| N | Q68XJ4 | CC | Necessary for efficient export of extracytoplasmic proteins                                                                                                                                                               |
| N | Q68XJ4 | CC | Binds to the signal sequence when it emerges from the ribosomes (By similarity).                                                                                                                                          |
| N | Q68XJ4 | DE | Fifty-four homolog;                                                                                                                                                                                                       |
| N | Q68XJ4 | DE | Signal recognition particle protein;                                                                                                                                                                                      |
| N | Q68XJ4 | DR | 7S RNA binding                                                                                                                                                                                                            |
| N | Q68XJ4 | DR | SRP-dependent cotranslational protein targeting to membrane                                                                                                                                                               |
| N | Q68XJ4 | DR | nucleoside-triphosphatase activity                                                                                                                                                                                        |
| N | Q68XX7 | DE | Phosphate acetyltransferase;                                                                                                                                                                                              |
| N | Q68XX7 | DE | Phosphotransacetylase;                                                                                                                                                                                                    |
| N | Q68XX7 | DR | phosphate acetyltransferase activity                                                                                                                                                                                      |
| N | Q69ZB0 | CC | Required for the organization of the mitotic spindle                                                                                                                                                                      |
| N | Q69ZB0 | CC | Maintains the structural integrity of centrosomes during mitosis (By similarity).                                                                                                                                         |
| N | Q69ZB0 | DE | Leucine-rich repeat and coiled-coil domain-containing protein 1;                                                                                                                                                          |
| N | Q69ZB0 | DR | cell division                                                                                                                                                                                                             |
| N | Q69ZI1 | CC | Acts as a scaffold protein, contributes to Rac-induced signal transduction such as JNKs (MAPK8 and MAPK9) activation and induces apoptosis                                                                                |
| N | Q69ZI1 | CC | In fibroblasts, induces apoptosis.                                                                                                                                                                                        |
| N | Q69ZI1 | CC | Within a signaling complex, it probably recruits protein kinases such as MAP3K10 or MAP3K11 which are in turn activated leading to the sequential activation of MAP2K4, MAP2K7 and JNKs (MAPK8 and MAPK9) (By similarity) |
| N | Q69ZI1 | DE | Plenty of SH3s;                                                                                                                                                                                                           |
| N | Q69ZI1 | DE | Protein POSH;                                                                                                                                                                                                             |
| N | Q69ZI1 | DE | Putative E3 ubiquitin-protein ligase SH3RF1;                                                                                                                                                                              |
| N | Q69ZI1 | DE | SH3 domain-containing RING finger protein 1;                                                                                                                                                                              |
| N | Q69ZI1 | DE | SH3 multiple domains protein 2;                                                                                                                                                                                           |
| N | Q69ZI1 | DR | MAP-kinase scaffold activity                                                                                                                                                                                              |
| N | Q69ZI1 | DR | ligase activity                                                                                                                                                                                                           |
| N | Q69ZI1 | DR | regulation of JNK cascade                                                                                                                                                                                                 |

|   |        |    |                                                                                                                                                                                                                                                                                                          |
|---|--------|----|----------------------------------------------------------------------------------------------------------------------------------------------------------------------------------------------------------------------------------------------------------------------------------------------------------|
| N | Q69ZI1 | DR | zinc ion binding                                                                                                                                                                                                                                                                                         |
| N | Q69ZN7 | CC | Calcium/phospholipid-binding protein that plays a role in the plasmalemma repair mechanism of endothelial cells that permits rapid resealing of membranes disrupted by mechanical stress                                                                                                                 |
| N | Q69ZN7 | CC | implicated in VEGF signal transduction by regulating the levels of the receptor VEGFR                                                                                                                                                                                                                    |
| N | Q69ZN7 | CC | Involved in endocytic recycling                                                                                                                                                                                                                                                                          |
| N | Q69ZN7 | DE | Fer-1-like protein 3;                                                                                                                                                                                                                                                                                    |
| N | Q69ZN7 | DR | cellular response to heat                                                                                                                                                                                                                                                                                |
| N | Q69ZN7 | DR | phospholipid binding                                                                                                                                                                                                                                                                                     |
| N | Q69ZN7 | DR | plasma membrane repair                                                                                                                                                                                                                                                                                   |
| N | Q69ZN7 | DR | protein binding                                                                                                                                                                                                                                                                                          |
| N | Q69ZN7 | DR | regulation of vascular endothelial growth factor receptor signaling pathway                                                                                                                                                                                                                              |
| N | Q6A902 | CC | Can catalyze the hydrolysis of ATP in the presence of single-stranded DNA, the ATP-dependent uptake of single-stranded DNA by duplex DNA, and the ATP-dependent hybridization of homologous single-stranded DNAs                                                                                         |
| N | Q6A902 | CC | It interacts with LexA causing its activation and leading to its autocatalytic cleavage (By similarity).                                                                                                                                                                                                 |
| N | Q6A902 | DE | Protein RecA;                                                                                                                                                                                                                                                                                            |
| N | Q6A902 | DE | Recombinase A;                                                                                                                                                                                                                                                                                           |
| N | Q6A902 | DR | DNA recombination                                                                                                                                                                                                                                                                                        |
| N | Q6A902 | DR | DNA-dependent ATPase activity                                                                                                                                                                                                                                                                            |
| N | Q6A902 | DR | single-stranded DNA binding                                                                                                                                                                                                                                                                              |
| N | Q6A9C3 | DE | L-lactate dehydrogenase;                                                                                                                                                                                                                                                                                 |
| N | Q6A9C3 | DR | L-lactate dehydrogenase activity                                                                                                                                                                                                                                                                         |
| N | Q6A9C3 | DR | oxidation-reduction process                                                                                                                                                                                                                                                                              |
| N | Q6AB49 | CC | Ligates lysine onto the cytidine present at position 34 of the AUA codon-specific tRNA(Ile) that contains the anticodon CAU, in an ATP-dependent manner                                                                                                                                                  |
| N | Q6AB49 | CC | Cytidine is converted to lysidine, thus changing the amino acid specificity of the tRNA from methionine to isoleucine (By similarity).                                                                                                                                                                   |
| N | Q6AB49 | DE | tRNA(Ile)-2-lysyl-cytidine synthase;                                                                                                                                                                                                                                                                     |
| N | Q6AB49 | DE | tRNA(Ile)-lysidine synthase;                                                                                                                                                                                                                                                                             |
| N | Q6AB49 | DE | tRNA(Ile)-lysidine synthetase;                                                                                                                                                                                                                                                                           |
| N | Q6AB49 | DR | ligase activity, forming carbon-nitrogen bonds                                                                                                                                                                                                                                                           |
| N | Q6AB49 | DR | tRNA processing                                                                                                                                                                                                                                                                                          |
| N | Q6ADB9 | DE | Homoserine O-acetyltransferase;                                                                                                                                                                                                                                                                          |
| N | Q6ADB9 | DE | Homoserine O-trans-acetylase;                                                                                                                                                                                                                                                                            |
| N | Q6ADB9 | DE | Homoserine transacetylase;                                                                                                                                                                                                                                                                               |
| N | Q6ADB9 | DR | homoserine O-acetyltransferase activity                                                                                                                                                                                                                                                                  |
| N | Q6ADB9 | DR | methionine biosynthetic process                                                                                                                                                                                                                                                                          |
| N | Q6ADQ8 | CC | The natural substrate for this enzyme may be peptidyl- tRNAs which drop off the ribosome during protein synthesis (By similarity).                                                                                                                                                                       |
| N | Q6ADQ8 | DE | Peptidyl-tRNA hydrolase;                                                                                                                                                                                                                                                                                 |
| N | Q6ADQ8 | DR | aminoacyl-tRNA hydrolase activity                                                                                                                                                                                                                                                                        |
| N | Q6AEE4 | CC | Catalyzes the 2-thiolation of uridine at the wobble position (U34) of tRNA, leading to the formation of s(2)U34 (By similarity).                                                                                                                                                                         |
| N | Q6AEE4 | DE | tRNA-specific 2-thiouridylase mnmA;                                                                                                                                                                                                                                                                      |
| N | Q6AEE4 | DR | tRNA processing                                                                                                                                                                                                                                                                                          |
| N | Q6AEE4 | DR | transferase activity                                                                                                                                                                                                                                                                                     |
| N | Q6AGI2 | CC | Part of the Sec protein translocase complex<br>Has a central role in coupling the hydrolysis of ATP to the transfer of proteins into and across the cell membrane, serving as an ATP-driven molecular motor driving the stepwise translocation of polypeptide chains across the membrane (By similarity) |
| N | Q6AGI2 | CC | Interacts with the secYEG preprotein conducting channel                                                                                                                                                                                                                                                  |
| N | Q6AGI2 | DE | Protein translocase subunit secA;                                                                                                                                                                                                                                                                        |
| N | Q6AGI2 | DR | protein import                                                                                                                                                                                                                                                                                           |
| N | Q6AGI2 | DR | protein targeting                                                                                                                                                                                                                                                                                        |
| N | Q6AGI2 | DR | transmembrane transport                                                                                                                                                                                                                                                                                  |
| N | Q6AHC2 | CC | Catalyzes the thiamine diphosphate-dependent decarboxylation of 2-oxoglutarate and the subsequent addition of the resulting succinic semialdehyde-thiamine pyrophosphate anion to isochorismate to yield 2-succinyl-5-enolpyruvyl-6-hydroxy-3- cyclohexene-1-carboxylate (SEPHCHC) (By similarity).      |
| N | Q6AHC2 | DE | 2-succinyl-5-enolpyruvyl-6-hydroxy-3-cyclohexene-1-carboxylate synthase;                                                                                                                                                                                                                                 |
| N | Q6AHC2 | DE | Menaquinone biosynthesis protein menD;                                                                                                                                                                                                                                                                   |
| N | Q6AHC2 | DE | SEPHCHC synthase;                                                                                                                                                                                                                                                                                        |
| N | Q6AHC2 | DR | 2-succinyl-5-enolpyruvyl-6-hydroxy-3-cyclohexene-1-carboxylate synthase activity                                                                                                                                                                                                                         |

|   |        |    |                                                                                                                                                                                                                                                                                                                                      |
|---|--------|----|--------------------------------------------------------------------------------------------------------------------------------------------------------------------------------------------------------------------------------------------------------------------------------------------------------------------------------------|
| N | Q6AHC2 | DR | menaquinone biosynthetic process                                                                                                                                                                                                                                                                                                     |
| N | Q6AHC2 | DR | metal ion binding                                                                                                                                                                                                                                                                                                                    |
| N | Q6AHC2 | DR | thiamine pyrophosphate binding                                                                                                                                                                                                                                                                                                       |
| N | Q6APL9 | DE | Uncharacterized transporter DP0976;                                                                                                                                                                                                                                                                                                  |
| N | Q6APL9 | DR | cation transmembrane transporter activity                                                                                                                                                                                                                                                                                            |
| N | Q6APL9 | DR | potassium ion transport                                                                                                                                                                                                                                                                                                              |
| N | Q6APZ3 | CC | Transfers the N-acyl diglyceride group on what will become the N-terminal cysteine of membrane lipoproteins (By similarity).                                                                                                                                                                                                         |
| N | Q6APZ3 | DE | Prolipoprotein diacylglyceryl transferase;                                                                                                                                                                                                                                                                                           |
| N | Q6APZ3 | DR | lipoprotein biosynthetic process                                                                                                                                                                                                                                                                                                     |
| N | Q6APZ3 | DR | protein lipoylation                                                                                                                                                                                                                                                                                                                  |
| N | Q6APZ3 | DR | transferase activity, transferring glycosyl groups                                                                                                                                                                                                                                                                                   |
| N | Q6AT25 | DE | Zinc finger CCCH domain-containing protein 34;                                                                                                                                                                                                                                                                                       |
| N | Q6AT25 | DR | zinc ion binding                                                                                                                                                                                                                                                                                                                     |
| N | Q6AXU3 | CC | 3'-> 5'-exoribonuclease involved in ribosome biogenesis in the processing of the 12S pre-rRNA                                                                                                                                                                                                                                        |
| N | Q6AXU3 | CC | Displays a strong specificity for a 5'-end containing a free hydroxyl group (By similarity)                                                                                                                                                                                                                                          |
| N | Q6AXU3 | DE | Interferon-stimulated 20 kDa exonuclease-like 2;                                                                                                                                                                                                                                                                                     |
| N | Q6AXU3 | DR | exonuclease activity                                                                                                                                                                                                                                                                                                                 |
| N | Q6AXU3 | DR | nucleic acid binding                                                                                                                                                                                                                                                                                                                 |
| N | Q6AXU3 | DR | ribosome biogenesis                                                                                                                                                                                                                                                                                                                  |
| N | Q6AYG7 | CC | Plays a role in the inducible expression of cytokine genes in T-cells, especially by increasing NFAT-driven IL-4 production (By similarity).                                                                                                                                                                                         |
| N | Q6AYG7 | DE | NFATC2-interacting protein;                                                                                                                                                                                                                                                                                                          |
| N | Q6AYG7 | DE | Nuclear factor of activated T-cells, cytoplasmic 2-interacting protein;                                                                                                                                                                                                                                                              |
| N | Q6AYH2 | DE | Coiled-coil domain-containing protein 95;                                                                                                                                                                                                                                                                                            |
| N | Q6AYH2 | DE | INO80 complex subunit E;                                                                                                                                                                                                                                                                                                             |
| N | Q6AYH6 | DE | UPF0510 protein INM02;                                                                                                                                                                                                                                                                                                               |
| N | Q6B0Y1 | DE | Putative uncharacterized protein YML009W-B;                                                                                                                                                                                                                                                                                          |
| N | Q6B2U8 | DE | Uncharacterized protein YAL064C-A;                                                                                                                                                                                                                                                                                                   |
| N | Q6BQR8 | CC | DNA polymerase II participates in chromosomal DNA replication.                                                                                                                                                                                                                                                                       |
| N | Q6BQR8 | DE | DNA polymerase II subunit 2;                                                                                                                                                                                                                                                                                                         |
| N | Q6BQR8 | DE | DNA polymerase epsilon subunit B;                                                                                                                                                                                                                                                                                                    |
| N | Q6BQR8 | DR | DNA replication                                                                                                                                                                                                                                                                                                                      |
| N | Q6BQR8 | DR | DNA-directed DNA polymerase activity                                                                                                                                                                                                                                                                                                 |
| N | Q6BRA6 | CC | Involved in cytoplasm to vacuole transport (Cvt) and pexophagy (By similarity).                                                                                                                                                                                                                                                      |
| N | Q6BRA6 | DE | Autophagy-related protein 11;                                                                                                                                                                                                                                                                                                        |
| N | Q6BRA6 | DR | protein transport                                                                                                                                                                                                                                                                                                                    |
| N | Q6BUT3 | CC | May act as a negative regulator of salt tolerance (By similarity).                                                                                                                                                                                                                                                                   |
| N | Q6BUT3 | DE | Stress response protein NST1;                                                                                                                                                                                                                                                                                                        |
| N | Q6BUT3 | DR | response to stress                                                                                                                                                                                                                                                                                                                   |
| N | Q6BX45 | CC | PPIases accelerate the folding of proteins                                                                                                                                                                                                                                                                                           |
| N | Q6BX45 | CC | It catalyzes the cis-trans isomerization of proline imidic peptide bonds in oligopeptides (By similarity).                                                                                                                                                                                                                           |
| N | Q6BX45 | DE | FK506-binding protein 1;                                                                                                                                                                                                                                                                                                             |
| N | Q6BX45 | DE | Peptidyl-prolyl cis-trans isomerase;                                                                                                                                                                                                                                                                                                 |
| N | Q6BX45 | DE | Rapamycin-binding protein;                                                                                                                                                                                                                                                                                                           |
| N | Q6BX45 | DR | peptidyl-prolyl cis-trans isomerase activity                                                                                                                                                                                                                                                                                         |
| N | Q6BX45 | DR | protein folding                                                                                                                                                                                                                                                                                                                      |
| N | Q6BXC7 | CC | Bifunctional enzyme that catalyzes the enolization of 2,3-diketo-5-methylthiopentyl-1-phosphate (DK-MTP-1-P) into the intermediate 2-hydroxy-3-keto-5-methylthiopentenyl-1-phosphate (HK-MTPenyl-1-P), which is then dephosphorylated to form the acireductone 1,2-dihydroxy-3-keto-5-methylthiopentane (DHK-MTPene) (By similarity) |
| N | Q6BXC7 | DE | 2,3-diketo-5-methylthio-1-phosphopentane phosphatase;                                                                                                                                                                                                                                                                                |
| N | Q6BXC7 | DE | Enolase-phosphatase E1;                                                                                                                                                                                                                                                                                                              |
| N | Q6BXC7 | DR | L-methionine salvage from methylthioadenosine                                                                                                                                                                                                                                                                                        |
| N | Q6BXC7 | DR | acireductone synthase activity                                                                                                                                                                                                                                                                                                       |
| N | Q6BXC7 | DR | metal ion binding                                                                                                                                                                                                                                                                                                                    |
| N | Q6C6Y4 | CC | r-actin-capping proteins bind in a Ca(2+)-independent manner to the fast growing ends of actin filaments (barbed end) thereby blocking the exchange of subunits at these ends                                                                                                                                                        |
| N | Q6C6Y4 | CC | Unlike other capping proteins (such as gelsolin and severin), these proteins do not sever actin filaments (By similarity).                                                                                                                                                                                                           |
| N | Q6C6Y4 | DE | F-actin-capping protein subunit alpha;                                                                                                                                                                                                                                                                                               |
| N | Q6C6Y4 | DR | actin binding                                                                                                                                                                                                                                                                                                                        |
| N | Q6C6Y4 | DR | actin cytoskeleton organization                                                                                                                                                                                                                                                                                                      |



|   |        |    |                                                                                                                                                                                        |
|---|--------|----|----------------------------------------------------------------------------------------------------------------------------------------------------------------------------------------|
| N | Q6C6Y4 | DR | actin filament capping                                                                                                                                                                 |
| N | Q6CCU3 | CC | Involved in cell wall synthesis where it is required for glycosylation                                                                                                                 |
| N | Q6CCU3 | CC | Involved in cell cycle progression through cell- size checkpoint (By similarity).                                                                                                      |
| N | Q6CCU3 | DE | GDP-mannose pyrophosphorylase;                                                                                                                                                         |
| N | Q6CCU3 | DE | GTP-mannose-1-phosphate guanylyltransferase;                                                                                                                                           |
| N | Q6CCU3 | DE | Mannose-1-phosphate guanylyltransferase;                                                                                                                                               |
| N | Q6CCU3 | DR | biosynthetic process                                                                                                                                                                   |
| N | Q6CCU3 | DR | mannose-1-phosphate guanylyltransferase activity                                                                                                                                       |
| N | Q6CCU8 | CC | Required for multiple vacuole delivery pathways including the cytoplasm to vacuole transport (Cvt), autophagy, pexophagy and endocytosis (By similarity).                              |
| N | Q6CCU8 | DE | Vacuolar fusion protein MON1;                                                                                                                                                          |
| N | Q6CCU8 | DR | protein transport                                                                                                                                                                      |
| N | Q6CFD2 | CC | Catalyzes the first intracellular reaction of sulfate assimilation, forming adenosine-5'-phosphosulfate (APS) from inorganic sulfate and ATP                                           |
| N | Q6CFD2 | CC | Plays an important role in sulfate activation as a component of the biosynthesis pathway of sulfur- containing amino acids (By similarity).                                            |
| N | Q6CFD2 | DE | ATP-sulfurylase;                                                                                                                                                                       |
| N | Q6CFD2 | DE | Sulfate adenylate transferase;                                                                                                                                                         |
| N | Q6CFD2 | DE | Sulfate adenyltransferase;                                                                                                                                                             |
| N | Q6CFD2 | DR | cysteine biosynthetic process                                                                                                                                                          |
| N | Q6CFD2 | DR | kinase activity                                                                                                                                                                        |
| N | Q6CFD2 | DR | methionine biosynthetic process                                                                                                                                                        |
| N | Q6CFD2 | DR | sulfate adenyltransferase (ATP) activity                                                                                                                                               |
| N | Q6CFD2 | DR | sulfate assimilation                                                                                                                                                                   |
| N | Q6CFR3 | CC | Component of the cytosolic Fe/S protein assembly machinery                                                                                                                             |
| N | Q6CFR3 | CC | May play a role in the transfer of pre-assembled Fe/S clusters to target apoproteins (By similarity).                                                                                  |
| N | Q6CFR3 | CC | Required for maturation of extramitochondrial Fe/S proteins                                                                                                                            |
| N | Q6CFR3 | DE | Cytosolic Fe-S cluster assembly factor NAR1;                                                                                                                                           |
| N | Q6CFR3 | DE | Nuclear architecture-related protein 1;                                                                                                                                                |
| N | Q6CFR3 | DR | 4 iron, 4 sulfur cluster binding                                                                                                                                                       |
| N | Q6CFR3 | DR | iron-sulfur cluster assembly                                                                                                                                                           |
| N | Q6CFR3 | DR | metal ion binding                                                                                                                                                                      |
| N | Q6CHP5 | DE | Guanine nucleotide-binding protein subunit gamma;                                                                                                                                      |
| N | Q6CHP5 | DR | G-protein coupled receptor protein signaling pathway                                                                                                                                   |
| N | Q6CHP5 | DR | signal transducer activity                                                                                                                                                             |
| N | Q6CKY3 | CC | Required for the proteolytic cleavage of the transcription factor RIM101 in response to alkaline ambient pH (By similarity).                                                           |
| N | Q6CKY3 | DE | Calpain-like protease palB/RIM13;                                                                                                                                                      |
| N | Q6CKY3 | DE | Cysteine protease RIM13;                                                                                                                                                               |
| N | Q6CKY3 | DR | calcium-dependent cysteine-type endopeptidase activity                                                                                                                                 |
| N | Q6CND0 | CC | involved in deacetylation of histones, chromatin assembly and chromosome segregation                                                                                                   |
| N | Q6CND0 | CC | Component of the NuA4 histone acetyltransferase complex which is involved in transcriptional activation of selected genes principally by acetylation of nucleosomal histone H4 and H2A |
| N | Q6CND0 | CC | May act as a transcriptional oscillator, directing histone deacetylases to specific chromosomal domains                                                                                |
| N | Q6CND0 | CC | The NuA4 complex is also involved in DNA repair (By similarity).                                                                                                                       |
| N | Q6CND0 | DE | Chromatin modification-related protein EAF3;                                                                                                                                           |
| N | Q6CND0 | DR | chromatin assembly or disassembly                                                                                                                                                      |
| N | Q6CND0 | DR | chromatin binding                                                                                                                                                                      |
| N | Q6CND0 | DR | chromatin modification                                                                                                                                                                 |
| N | Q6CQL7 | DE | 1-(5-phosphoribosyl)-5-[(5-phosphoribosylamino)methylideneamino] imidazole-4-carboxamide isomerase;                                                                                    |
| N | Q6CQL7 | DE | 5-proFAR isomerase;                                                                                                                                                                    |
| N | Q6CQL7 | DE | Phosphoribosylformimino-5-aminoimidazole carboxamide ribotide isomerase;                                                                                                               |
| N | Q6CQL7 | DR | 1-(5-phosphoribosyl)-5-[(5-phosphoribosylamino)methylideneamino]imidazole-4-carboxamide isomerase activity                                                                             |
| N | Q6CQL7 | DR | histidine biosynthetic process                                                                                                                                                         |
| N | Q6CSP9 | CC | GTPase that associates with pre-60S ribosomal subunits in the nucleolus and is required for their nuclear export and maturation (By similarity).                                       |
| N | Q6CSP9 | DE | Nucleolar GTP-binding protein 2;                                                                                                                                                       |
| N | Q6CSP9 | DR | ribosome biogenesis                                                                                                                                                                    |
| N | Q6CU61 | CC | Involved in the partitioning of the mitochondrial organelle and mitochondrial DNA (mtDNA) inheritance (By similarity).                                                                 |

|   |        |    |                                                                                                                                                        |
|---|--------|----|--------------------------------------------------------------------------------------------------------------------------------------------------------|
| N | Q6CU61 | DE | Protein DML1;                                                                                                                                          |
| N | Q6CU61 | DR | protein polymerization                                                                                                                                 |
| N | Q6CVX2 | DE | Altered inheritance of mitochondria protein 39, mitochondrial;                                                                                         |
| N | Q6CW75 | CC | Adds a GMP to the 5'-end of tRNA(His) after transcription and RNase P cleavage (By similarity).                                                        |
| N | Q6CW75 | DE | tRNA(His) guanylyltransferase;                                                                                                                         |
| N | Q6CW75 | DE | tRNA-histidine guanylyltransferase;                                                                                                                    |
| N | Q6CW75 | DR | tRNA guanylyltransferase activity                                                                                                                      |
| N | Q6CW75 | DR | tRNA modification                                                                                                                                      |
| N | Q6CWW7 | CC | Constituent of COPII-coated endoplasmic reticulum- derived transport vesicles                                                                          |
| N | Q6CWW7 | CC | Facilitates retrograde transport from the Golgi to the endoplasmic reticulum (By similarity).                                                          |
| N | Q6CWW7 | CC | Required for efficient transport of a subset of secretory proteins to the Golgi                                                                        |
| N | Q6CWW7 | DE | Endoplasmic reticulum vesicle protein 25;                                                                                                              |
| N | Q6CWW7 | DR | protein transport                                                                                                                                      |
| N | Q6CWW7 | DR | vesicle-mediated transport                                                                                                                             |
| N | Q6CXB9 | CC | Component of the EKC/KEOPS complex which promotes both telomere uncapping and telomere elongation (By similarity)                                      |
| N | Q6CXB9 | CC | Important for bud site selection (By similarity).                                                                                                      |
| N | Q6CXB9 | CC | The complex is required for efficient recruitment of transcriptional coactivators                                                                      |
| N | Q6CXB9 | DE | Serine/threonine-protein kinase BUD32;                                                                                                                 |
| N | Q6CXB9 | DR | lipopolysaccharide biosynthetic process                                                                                                                |
| N | Q6CXB9 | DR | protein phosphorylation                                                                                                                                |
| N | Q6CXB9 | DR | protein serine/threonine kinase activity                                                                                                               |
| N | Q6CXB9 | DR | protein tyrosine kinase activity                                                                                                                       |
| N | Q6CZW6 | CC | This protein promotes the GTP-dependent binding of aminoacyl-tRNA to the A-site of ribosomes during protein biosynthesis (By similarity).              |
| N | Q6CZW6 | DE | Elongation factor Tu;                                                                                                                                  |
| N | Q6CZW6 | DR | GTPase activity                                                                                                                                        |
| N | Q6CZW6 | DR | translation elongation factor activity                                                                                                                 |
| N | Q6D035 | DE | Phosphatidylserine decarboxylase alpha chain;                                                                                                          |
| N | Q6D035 | DE | Phosphatidylserine decarboxylase beta chain;                                                                                                           |
| N | Q6D035 | DE | Phosphatidylserine decarboxylase proenzyme;                                                                                                            |
| N | Q6D035 | DR | phosphatidylserine decarboxylase activity                                                                                                              |
| N | Q6D035 | DR | phospholipid biosynthetic process                                                                                                                      |
| N | Q6D0E0 | CC | Specifically dimethylates two adjacent adenosines (A1518 and A1519) in the loop of a conserved hairpin near the 3'-end of 16S rRNA in the 30S particle |
| N | Q6D0E0 | CC | May play a critical role in biogenesis of 30S subunits (By similarity).                                                                                |
| N | Q6D0E0 | DE | 16S rRNA (adenine(1518)-N(6)/adenine(1519)-N(6))-dimethyltransferase;                                                                                  |
| N | Q6D0E0 | DE | 16S rRNA dimethyladenosine transferase;                                                                                                                |
| N | Q6D0E0 | DE | 16S rRNA dimethylase;                                                                                                                                  |
| N | Q6D0E0 | DE | Ribosomal RNA small subunit methyltransferase A;                                                                                                       |
| N | Q6D0E0 | DE | S-adenosylmethionine-6-N', N'-adenosyl(rRNA) dimethyltransferase;                                                                                      |
| N | Q6D0E0 | DR | rRNA (adenine-N6,N6-)-dimethyltransferase activity                                                                                                     |
| N | Q6D0G7 | CC | Catalyzes the oxidation of 3-carboxy-2-hydroxy-4- methylpentanoate (3-isopropylmalate) to 3-carboxy-4-methyl-2- oxopentanoate                          |
| N | Q6D0G7 | CC | The product decarboxylates to 4-methyl-2 oxopentanoate.                                                                                                |
| N | Q6D0G7 | DE | 3-isopropylmalate dehydrogenase;                                                                                                                       |
| N | Q6D0G7 | DE | Beta-IPM dehydrogenase;                                                                                                                                |
| N | Q6D0G7 | DR | 3-isopropylmalate dehydrogenase activity                                                                                                               |
| N | Q6D0G7 | DR | leucine biosynthetic process                                                                                                                           |
| N | Q6D0G7 | DR | magnesium ion binding                                                                                                                                  |
| N | Q6D0G7 | DR | oxidation-reduction process                                                                                                                            |
| N | Q6D1A3 | CC | Reduction of activated sulfate into sulfite.                                                                                                           |
| N | Q6D1A3 | DE | 3'-phosphoadenylylsulfate reductase;                                                                                                                   |
| N | Q6D1A3 | DE | PAPS reductase, thioredoxin dependent;                                                                                                                 |
| N | Q6D1A3 | DE | PAPS sulfotransferase;                                                                                                                                 |
| N | Q6D1A3 | DE | PAdoPS reductase;                                                                                                                                      |
| N | Q6D1A3 | DE | Phosphoadenosine phosphosulfate reductase;                                                                                                             |
| N | Q6D1A3 | DR | cysteine biosynthetic process                                                                                                                          |
| N | Q6D1A3 | DR | phosphoadenylyl-sulfate reductase (thioredoxin) activity                                                                                               |
| N | Q6D1A3 | DR | sulfate assimilation, phosphoadenylyl sulfate reduction by phosphoadenylyl-sulfate reductase (thioredoxin)                                             |
| N | Q6D808 | DE | 50S ribosomal protein L36 2;                                                                                                                           |
| N | Q6D808 | DR | structural constituent of ribosome                                                                                                                     |

|   |        |    |                                                                                                                                                                                                       |
|---|--------|----|-------------------------------------------------------------------------------------------------------------------------------------------------------------------------------------------------------|
| N | Q6D8C9 | CC | Endonuclease that specifically degrades the RNA of RNA- DNA hybrids (By similarity).                                                                                                                  |
| N | Q6D8C9 | DE | Ribonuclease HII;                                                                                                                                                                                     |
| N | Q6D8C9 | DR | metal ion binding                                                                                                                                                                                     |
| N | Q6D8C9 | DR | ribonuclease H activity                                                                                                                                                                               |
| N | Q6D9C5 | DE | 50S ribosomal protein L27;                                                                                                                                                                            |
| N | Q6D9C5 | DR | structural constituent of ribosome                                                                                                                                                                    |
| N | Q6DCX2 | CC | Required for RNA-mediated gene silencing (RNAi) by the RNA-induced silencing complex (RISC)                                                                                                           |
| N | Q6DCX2 | CC | Binding of RISC to a partially complementary mRNA results in silencing through inhibition of translation, and this is independent of endonuclease activity                                            |
| N | Q6DCX2 | CC | Binding of RISC to a perfectly complementary mRNA generally results in silencing due to endonucleolytic cleavage of the mRNA specifically by eif2c2/ago2                                              |
| N | Q6DCX2 | CC | The 'minimal RISC' appears to include eif2c2/ago2 bound to a short guide RNA such as a microRNA (miRNA) or short interfering RNA (siRNA)                                                              |
| N | Q6DCX2 | CC | The inhibition of translational initiation leads to the accumulation of the affected mRNA in cytoplasmic processing bodies (P-bodies), where mRNA degradation may subsequently occur (By similarity). |
| N | Q6DCX2 | CC | The precise mechanism of gene silencing depends on the degree of complementarity between the miRNA or siRNA and its target                                                                            |
| N | Q6DCX2 | CC | These guide RNAs direct RISC to complementary mRNAs that are targets for RISC- mediated gene silencing                                                                                                |
| N | Q6DCX2 | DE | Argonaute2;                                                                                                                                                                                           |
| N | Q6DCX2 | DE | Eukaryotic translation initiation factor 2C 2;                                                                                                                                                        |
| N | Q6DCX2 | DE | Protein argonaute-2;                                                                                                                                                                                  |
| N | Q6DCX2 | DE | Protein slicer;                                                                                                                                                                                       |
| N | Q6DCX2 | DR | RNA 7-methylguanosine cap binding                                                                                                                                                                     |
| N | Q6DCX2 | DR | endoribonuclease activity, cleaving siRNA-paired mRNA                                                                                                                                                 |
| N | Q6DCX2 | DR | mRNA cleavage involved in gene silencing by miRNA                                                                                                                                                     |
| N | Q6DCX2 | DR | metal ion binding                                                                                                                                                                                     |
| N | Q6DCX2 | DR | negative regulation of translation involved in gene silencing by miRNA                                                                                                                                |
| N | Q6DCX2 | DR | negative regulation of translational initiation                                                                                                                                                       |
| N | Q6DCX2 | DR | pre-microRNA processing                                                                                                                                                                               |
| N | Q6DCX2 | DR | siRNA binding                                                                                                                                                                                         |
| N | Q6DD06 | CC | Protects drg1 from proteolytic degradation (By similarity).                                                                                                                                           |
| N | Q6DD06 | DE | DRG family-regulatory protein 1;                                                                                                                                                                      |
| N | Q6DD06 | DE | Zinc finger CCCH domain-containing protein 15;                                                                                                                                                        |
| N | Q6DD06 | DR | nucleic acid binding                                                                                                                                                                                  |
| N | Q6DD06 | DR | zinc ion binding                                                                                                                                                                                      |
| N | Q6DER2 | DE | 60S ribosomal protein L36;                                                                                                                                                                            |
| N | Q6DER2 | DR | structural constituent of ribosome                                                                                                                                                                    |
| N | Q6DIP9 | DE | WASH complex subunit strumpellin;                                                                                                                                                                     |
| N | Q6DPE5 | CC | Encapsidates the negative strand viral RNA, protecting it from nucleases                                                                                                                              |
| N | Q6DPE5 | CC | Dissociation of M1 from RNP unmask nucleoprotein's nuclear localization signals, targeting the RNP to the nucleus (By similarity).                                                                    |
| N | Q6DPE5 | CC | It is possible that the nucleoprotein binds directly exportin-1 (XPO1) and plays an active role in RNP nuclear export                                                                                 |
| N | Q6DPE5 | CC | Later in the infection, nucleus export of RNP are mediated through viral proteins                                                                                                                     |
| N | Q6DPE5 | CC | NEP interacting with M1 which binds nucleoproteins                                                                                                                                                    |
| N | Q6DPE5 | CC | M1 interaction with NEP seems to mediate nucleoprotein's nuclear localization                                                                                                                         |
| N | Q6DPE5 | CC | NEP comprises at least 2 nuclear localization signals and is responsible of the active RNP import into the nucleus through the cellular importin alpha/beta pathway                                   |
| N | Q6DPE5 | CC | Soon after a virion infects a new cell, M1 dissociates from the RNP under acidification of the virion driven by M2 protein                                                                            |
| N | Q6DPE5 | CC | The RNP needs to be localized in the nucleus to start an infectious cycle, but is too large to diffuse through the nuclear pore complex                                                               |
| N | Q6DPE5 | CC | The encapsidated genomic RNA is termed the ribonucleoprotein (RNP) and serves as template for transcription and replication                                                                           |
| N | Q6DPE5 | DE | Nucleoprotein;                                                                                                                                                                                        |
| N | Q6DPE5 | DR | interspecies interaction between organisms                                                                                                                                                            |
| N | Q6DPE5 | DR | structural molecule activity                                                                                                                                                                          |
| N | Q6DPT9 | CC | Forms a proton-selective ion channel that is necessary for the efficient release of the viral genome during virus entry                                                                               |
| N | Q6DPT9 | CC | Acidification of the endosome triggers M2 ion channel activity                                                                                                                                        |
| N | Q6DPT9 | CC | After attaching to the cell surface, the virion enters the cell by endocytosis                                                                                                                        |

|   |        |    |                                                                                                                                                                                                                                                                                                                                                                         |
|---|--------|----|-------------------------------------------------------------------------------------------------------------------------------------------------------------------------------------------------------------------------------------------------------------------------------------------------------------------------------------------------------------------------|
| N | Q6DPT9 | CC | Also plays a role in viral proteins secretory pathway                                                                                                                                                                                                                                                                                                                   |
| N | Q6DPT9 | CC | Elevates the intravesicular pH of normally acidic compartments, such as trans-Golgi network, preventing newly formed hemagglutinin from premature switching to the fusion-active conformation (By similarity).                                                                                                                                                          |
| N | Q6DPT9 | CC | The influx of protons into virion interior is believed to disrupt interactions between the viral ribonucleoprotein (RNP), matrix protein 1 (M1), and lipid bilayers, thereby freeing the viral genome from interaction with viral proteins and enabling RNA segments to migrate to the host cell nucleus, where influenza virus RNA transcription and replication occur |
| N | Q6DPT9 | DE | Matrix protein 2;                                                                                                                                                                                                                                                                                                                                                       |
| N | Q6DPT9 | DE | Proton channel protein M2;                                                                                                                                                                                                                                                                                                                                              |
| N | Q6DPT9 | DR | hydrogen ion transmembrane transporter activity                                                                                                                                                                                                                                                                                                                         |
| N | Q6DPT9 | DR | interspecies interaction between organisms                                                                                                                                                                                                                                                                                                                              |
| N | Q6DPT9 | DR | ion channel activity                                                                                                                                                                                                                                                                                                                                                    |
| N | Q6DT45 | CC | Hydrolyzes semenogelin-1 thus leading to the liquefaction of the seminal coagulum (By similarity).                                                                                                                                                                                                                                                                      |
| N | Q6DT45 | DE | Kallikrein-3;                                                                                                                                                                                                                                                                                                                                                           |
| N | Q6DT45 | DE | Prostate-specific antigen;                                                                                                                                                                                                                                                                                                                                              |
| N | Q6DT45 | DE | Semenogelase;                                                                                                                                                                                                                                                                                                                                                           |
| N | Q6DT45 | DR | serine-type endopeptidase activity                                                                                                                                                                                                                                                                                                                                      |
| N | Q6EIJ3 | CC | Usually encoded in the trnK tRNA gene intron                                                                                                                                                                                                                                                                                                                            |
| N | Q6EIJ3 | CC | probably assists in splicing its own and other chloroplast group II introns (By similarity)                                                                                                                                                                                                                                                                             |
| N | Q6EIJ3 | DE | Intron maturase;                                                                                                                                                                                                                                                                                                                                                        |
| N | Q6EIJ3 | DR | mRNA processing                                                                                                                                                                                                                                                                                                                                                         |
| N | Q6EIJ3 | DR | tRNA processing                                                                                                                                                                                                                                                                                                                                                         |
| N | Q6ENP4 | CC | NDH shuttles electrons from NAD(P)H:plastoquinone, via FMN and iron-sulfur (Fe-S) centers, to quinones in the photosynthetic chain and possibly in a chloroplast respiratory chain                                                                                                                                                                                      |
| N | Q6ENP4 | CC | Couples the redox reaction to proton translocation, and thus conserves the redox energy in a proton gradient (By similarity).                                                                                                                                                                                                                                           |
| N | Q6ENP4 | CC | The immediate electron acceptor for the enzyme in this species is believed to be plastoquinone                                                                                                                                                                                                                                                                          |
| N | Q6ENP4 | DE | NAD(P)H dehydrogenase subunit 6;                                                                                                                                                                                                                                                                                                                                        |
| N | Q6ENP4 | DE | NAD(P)H-quinone oxidoreductase subunit 6, chloroplastic;                                                                                                                                                                                                                                                                                                                |
| N | Q6ENP4 | DE | NADH-plastoquinone oxidoreductase subunit 6;                                                                                                                                                                                                                                                                                                                            |
| N | Q6ENP4 | DR | NADH dehydrogenase (ubiquinone) activity                                                                                                                                                                                                                                                                                                                                |
| N | Q6ENP4 | DR | oxidation-reduction process                                                                                                                                                                                                                                                                                                                                             |
| N | Q6ENP4 | DR | quinone binding                                                                                                                                                                                                                                                                                                                                                         |
| N | Q6EV77 | CC | Catalyzes the addition of fucose in alpha 1-6 linkage to the first GlcNAc residue, next to the peptide chains in N-glycans (By similarity).                                                                                                                                                                                                                             |
| N | Q6EV77 | DE | Alpha-(1,6)-fucosyltransferase;                                                                                                                                                                                                                                                                                                                                         |
| N | Q6EV77 | DE | Fucosyltransferase 8;                                                                                                                                                                                                                                                                                                                                                   |
| N | Q6EV77 | DE | GDP-L-Fuc:N-acetyl-beta-D-glucosaminide alpha1,6-fucosyltransferase;                                                                                                                                                                                                                                                                                                    |
| N | Q6EV77 | DE | GDP-fucose--glycoprotein fucosyltransferase;                                                                                                                                                                                                                                                                                                                            |
| N | Q6EV77 | DE | Glycoprotein 6-alpha-L-fucosyltransferase;                                                                                                                                                                                                                                                                                                                              |
| N | Q6EV77 | DE | alpha1-6FucT;                                                                                                                                                                                                                                                                                                                                                           |
| N | Q6EV77 | DR | SH3 domain binding                                                                                                                                                                                                                                                                                                                                                      |
| N | Q6EV77 | DR | glycoprotein 6-alpha-L-fucosyltransferase activity                                                                                                                                                                                                                                                                                                                      |
| N | Q6EV77 | DR | protein glycosylation in Golgi                                                                                                                                                                                                                                                                                                                                          |
| N | Q6EW16 | CC | One of the primary rRNA binding proteins, it binds directly to 16S rRNA central domain where it helps coordinate assembly of the platform of the 30S subunit (By similarity)                                                                                                                                                                                            |
| N | Q6EW16 | DE | 30S ribosomal protein S8, chloroplastic;                                                                                                                                                                                                                                                                                                                                |
| N | Q6EW16 | DR | structural constituent of ribosome                                                                                                                                                                                                                                                                                                                                      |
| N | Q6EWG8 | CC | The movement protein is assembled into tubules that allow the transport of virions from cell to cell (By similarity).                                                                                                                                                                                                                                                   |
| N | Q6EWG8 | DE | Capsid protein VP20;                                                                                                                                                                                                                                                                                                                                                    |
| N | Q6EWG8 | DE | Capsid protein VP24;                                                                                                                                                                                                                                                                                                                                                    |
| N | Q6EWG8 | DE | Capsid protein VP25;                                                                                                                                                                                                                                                                                                                                                    |
| N | Q6EWG8 | DE | Movement protein;                                                                                                                                                                                                                                                                                                                                                       |
| N | Q6EWG8 | DE | RNA2 polyprotein;                                                                                                                                                                                                                                                                                                                                                       |
| N | Q6EWG8 | DR | spread of virus in host, cell to cell                                                                                                                                                                                                                                                                                                                                   |
| N | Q6EYJ5 | CC | Seems to play a role in the dimerization of PSII (By similarity).                                                                                                                                                                                                                                                                                                       |
| N | Q6EYJ5 | DE | Photosystem II reaction center protein T;                                                                                                                                                                                                                                                                                                                               |
| N | Q6EYJ5 | DR | photosynthesis                                                                                                                                                                                                                                                                                                                                                          |
| N | Q6F147 | CC | Negative regulator of class I heat shock genes (gipe- uhaK-uhaJ and groEL3 operon)                                                                                                                                                                                                                                                                                      |

|   |        |    |                                                                                                                                                                                                                                                      |
|---|--------|----|------------------------------------------------------------------------------------------------------------------------------------------------------------------------------------------------------------------------------------------------------|
| N | Q6F147 | CC | Prevents heat-shock induction of these operons (By similarity).                                                                                                                                                                                      |
| N | Q6F147 | DE | Heat-inducible transcription repressor hrcA;                                                                                                                                                                                                         |
| N | Q6F147 | DR | regulation of transcription, DNA-dependent                                                                                                                                                                                                           |
| N | Q6F147 | DR | response to stress                                                                                                                                                                                                                                   |
| N | Q6F705 | CC | Cell wall formation (By similarity).                                                                                                                                                                                                                 |
| N | Q6F705 | DE | D-Ala-D-Ala ligase;                                                                                                                                                                                                                                  |
| N | Q6F705 | DE | D-alanine--D-alanine ligase;                                                                                                                                                                                                                         |
| N | Q6F705 | DE | D-alanylalanine synthetase;                                                                                                                                                                                                                          |
| N | Q6F705 | DR | D-alanine-D-alanine ligase activity                                                                                                                                                                                                                  |
| N | Q6F705 | DR | cellular cell wall organization                                                                                                                                                                                                                      |
| N | Q6F705 | DR | metal ion binding                                                                                                                                                                                                                                    |
| N | Q6F705 | DR | peptidoglycan biosynthetic process                                                                                                                                                                                                                   |
| N | Q6F705 | DR | regulation of cell shape                                                                                                                                                                                                                             |
| N | Q6FCI6 | DE | Phosphoriboisomerase A;                                                                                                                                                                                                                              |
| N | Q6FCI6 | DE | Ribose-5-phosphate isomerase A;                                                                                                                                                                                                                      |
| N | Q6FCI6 | DR | pentose-phosphate shunt, non-oxidative branch                                                                                                                                                                                                        |
| N | Q6FCI6 | DR | ribose-5-phosphate isomerase activity<br>required for the formation of a threonylcarbamoyl group on adenosine at<br>position 37 (t(6)A37) in tRNAs that read codons beginning with adenine (By<br>similarity)                                        |
| N | Q6FFH9 | CC |                                                                                                                                                                                                                                                      |
| N | Q6FFH9 | DE | t(6)A37 threonylcarbamoyladenine biosynthesis protein RimN;                                                                                                                                                                                          |
| N | Q6FFH9 | DE | tRNA threonylcarbamoyladenine biosynthesis protein RimN;                                                                                                                                                                                             |
| N | Q6FFH9 | DR | tRNA processing                                                                                                                                                                                                                                      |
| N | Q6FUJ7 | CC | Involved in pre-mRNA splicing and cell cycle progression (By similarity).                                                                                                                                                                            |
| N | Q6FUJ7 | DE | Pre-mRNA-splicing factor SYF1;                                                                                                                                                                                                                       |
| N | Q6FUJ7 | DR | mRNA processing                                                                                                                                                                                                                                      |
| N | Q6FX63 | CC | Required for proper assembly of pre-ribosomal particles during the biogenesis of<br>the 60S ribosomal subunit (By similarity).                                                                                                                       |
| N | Q6FX63 | DE | 2'-O-ribose RNA methyltransferase;                                                                                                                                                                                                                   |
| N | Q6FX63 | DE | AdoMet-dependent rRNA methyltransferase SPB1;                                                                                                                                                                                                        |
| N | Q6FX63 | DE | S-adenosyl-L-methionine-dependent methyltransferase;                                                                                                                                                                                                 |
| N | Q6FX63 | DR | methyltransferase activity                                                                                                                                                                                                                           |
| N | Q6FX63 | DR | nucleic acid binding                                                                                                                                                                                                                                 |
| N | Q6FX63 | DR | rRNA methylation                                                                                                                                                                                                                                     |
| N | Q6FZ21 | DE | UPF0102 protein BQ09720;                                                                                                                                                                                                                             |
| N | Q6FZ21 | DR | nuclease activity                                                                                                                                                                                                                                    |
| N | Q6FZD8 | CC | This is one of the proteins that binds and probably mediates the attachment of<br>the 5S RNA into the large ribosomal subunit, where it forms part of the central<br>protuberance (By similarity).                                                   |
| N | Q6FZD8 | DE | 50S ribosomal protein L18;                                                                                                                                                                                                                           |
| N | Q6FZD8 | DR | structural constituent of ribosome                                                                                                                                                                                                                   |
| N | Q6FZK7 | CC | Allows the formation of correctly charged Asn-tRNA(Asn) or Gln-tRNA(Gln)<br>through the transamidation of misacylated Asp- tRNA(Asn) or Glu-tRNA(Gln) in<br>organisms which lack either or both of asparaginyl-tRNA or glutaminy-tRNA<br>synthetases |
| N | Q6FZK7 | CC | The reaction takes place in the presence of glutamine and ATP through an<br>activated phospho-Asp-tRNA(Asn) or phospho-Glu-tRNA(Gln) (By similarity).                                                                                                |
| N | Q6FZK7 | DE | Asp/Glu-ADT subunit B;                                                                                                                                                                                                                               |
| N | Q6FZK7 | DE | Aspartyl/glutamyl-tRNA(Asn/Gln) amidotransferase subunit B;                                                                                                                                                                                          |
| N | Q6FZK7 | DR | carbon-nitrogen ligase activity, with glutamine as amido-N-donor                                                                                                                                                                                     |
| N | Q6FZU8 | CC | Phosphorylation of dTMP to form dTDP in both de novo and salvage pathways<br>of dTTP synthesis (By similarity).                                                                                                                                      |
| N | Q6FZU8 | DE | Thymidylate kinase;                                                                                                                                                                                                                                  |
| N | Q6FZU8 | DE | dTMP kinase;                                                                                                                                                                                                                                         |
| N | Q6FZU8 | DR | dTDP biosynthetic process                                                                                                                                                                                                                            |
| N | Q6FZU8 | DR | thymidylate kinase activity                                                                                                                                                                                                                          |
| N | Q6G0F8 | CC | This is one of the proteins that binds to the 5S RNA in the ribosome where it<br>forms part of the central protuberance (By similarity).                                                                                                             |
| N | Q6G0F8 | DE | 50S ribosomal protein L25;                                                                                                                                                                                                                           |
| N | Q6G0F8 | DE | General stress protein CTC;                                                                                                                                                                                                                          |
| N | Q6G0F8 | DR | 5S rRNA binding                                                                                                                                                                                                                                      |
| N | Q6G0F8 | DR | structural constituent of ribosome                                                                                                                                                                                                                   |
| N | Q6G5R1 | CC | The ruvA-ruvB complex in the presence of ATP renatures cruciform structure in<br>supercoiled DNA with palindromic sequence, indicating that it may promote<br>strand exchange reactions in homologous recombination                                  |
| N | Q6G5R1 | CC | RuvAB is an helicase that mediates the Holliday junction migration by localized<br>denaturation and reannealing (By similarity).                                                                                                                     |

|   |        |    |                                                                                                                                                                                                                  |
|---|--------|----|------------------------------------------------------------------------------------------------------------------------------------------------------------------------------------------------------------------|
| N | Q6G5R1 | DE | Holliday junction ATP-dependent DNA helicase ruvB;                                                                                                                                                               |
| N | Q6G5R1 | DR | DNA recombination                                                                                                                                                                                                |
| N | Q6G5R1 | DR | four-way junction helicase activity                                                                                                                                                                              |
| N | Q6G5Z1 | CC | Probably part of an ABC transporter complex                                                                                                                                                                      |
| N | Q6G5Z1 | CC | Responsible for energy coupling to the transport system (By similarity).                                                                                                                                         |
| N | Q6G5Z1 | DE | Putative ABC transporter ATP-binding protein SAS2569;                                                                                                                                                            |
| N | Q6G5Z1 | DR | ATPase activity                                                                                                                                                                                                  |
| N | Q6G5Z1 | DR | hydrolase activity, acting on acid anhydrides, catalyzing transmembrane movement of substances                                                                                                                   |
| N | Q6G625 | CC | Part of the Sec protein translocase complex has a central role in coupling the hydrolysis of ATP to the transfer of proteins into and across the cell membrane, serving as an ATP-driven molecular motor         |
| N | Q6G625 | CC | driving the stepwise translocation of polypeptide chains across the membrane (By similarity)                                                                                                                     |
| N | Q6G625 | CC | Interacts with the secYEG preprotein conducting channel                                                                                                                                                          |
| N | Q6G625 | DE | Protein translocase subunit secA 2;                                                                                                                                                                              |
| N | Q6G625 | DR | P-P-bond-hydrolysis-driven protein transmembrane transporter activity                                                                                                                                            |
| N | Q6G625 | DR | protein import                                                                                                                                                                                                   |
| N | Q6G625 | DR | protein targeting                                                                                                                                                                                                |
| N | Q6G773 | CC | One of the early assembly proteins it binds 23S rRNA                                                                                                                                                             |
| N | Q6G773 | CC | forms the main docking site for trigger factor binding to the ribosome (By similarity)                                                                                                                           |
| N | Q6G773 | CC | One of the proteins that surrounds the polypeptide exit tunnel on the outside of the ribosome                                                                                                                    |
| N | Q6G773 | DE | 50S ribosomal protein L23;                                                                                                                                                                                       |
| N | Q6G773 | DR | nucleotide binding                                                                                                                                                                                               |
| N | Q6G773 | DR | structural constituent of ribosome                                                                                                                                                                               |
| N | Q6G7J2 | CC | Peptide chain release factor 1 directs the termination of translation in response to the peptide chain termination codons UAG and UAA (By similarity).                                                           |
| N | Q6G7J2 | DE | Peptide chain release factor 1;                                                                                                                                                                                  |
| N | Q6G7J2 | DR | translation release factor activity, codon specific                                                                                                                                                              |
| N | Q6G8P0 | CC | Negatively regulates transcription of bacterial ribonucleotide reductase nrd genes and operons by binding to NrdR- boxes (By similarity).                                                                        |
| N | Q6G8P0 | DE | Transcriptional repressor NrdR;                                                                                                                                                                                  |
| N | Q6G8P0 | DR | transcription repressor activity                                                                                                                                                                                 |
| N | Q6G8P0 | DR | zinc ion binding                                                                                                                                                                                                 |
| N | Q6GB63 | CC | May be required for sporulation (By similarity).                                                                                                                                                                 |
| N | Q6GB63 | DE | Putative sporulation transcription regulator whiA;                                                                                                                                                               |
| N | Q6GBK3 | DE | Mrp complex subunit E2;                                                                                                                                                                                          |
| N | Q6GBK3 | DE | Putative NADH-ubiquinone oxidoreductase subunit mnhE2;                                                                                                                                                           |
| N | Q6GBK3 | DE | Putative antiporter subunit mnhE2;                                                                                                                                                                               |
| N | Q6GBK3 | DR | antiporter activity                                                                                                                                                                                              |
| N | Q6GBK3 | DR | cation transmembrane transporter activity                                                                                                                                                                        |
| N | Q6GBZ0 | CC | Could be involved in septation (By similarity).                                                                                                                                                                  |
| N | Q6GBZ0 | DE | Putative septation protein spoVG;                                                                                                                                                                                |
| N | Q6GBZ0 | DR | barrier septum formation                                                                                                                                                                                         |
| N | Q6GBZ0 | DR | sporulation resulting in formation of a cellular spore                                                                                                                                                           |
| N | Q6GDK4 | CC | Catalyzes the reversible reaction in which hydroxymethyl group from 5,10-methylenetetrahydrofolate is transferred onto alpha-ketoisovalerate to form ketopantoate (By similarity).                               |
| N | Q6GDK4 | DE | 3-methyl-2-oxobutanoate hydroxymethyltransferase;                                                                                                                                                                |
| N | Q6GDK4 | DE | Ketopantoate hydroxymethyltransferase;                                                                                                                                                                           |
| N | Q6GDK4 | DR | 3-methyl-2-oxobutanoate hydroxymethyltransferase activity                                                                                                                                                        |
| N | Q6GDK4 | DR | metal ion binding                                                                                                                                                                                                |
| N | Q6GDK4 | DR | methyltransferase activity                                                                                                                                                                                       |
| N | Q6GDK4 | DR | pantothenate biosynthetic process                                                                                                                                                                                |
| N | Q6GEN5 | DE | Galactose-6-phosphate isomerase subunit lacB;                                                                                                                                                                    |
| N | Q6GEN5 | DR | galactose-6-phosphate isomerase activity                                                                                                                                                                         |
| N | Q6GEN5 | DR | lactose catabolic process                                                                                                                                                                                        |
| N | Q6GEW8 | CC | F(1)F(0) ATP synthase produces ATP from ADP in the presence of a proton or sodium gradient                                                                                                                       |
| N | Q6GEW8 | CC | During catalysis, ATP synthesis in the catalytic domain of F(1) is coupled via a rotary mechanism of the central stalk subunits to proton translocation (By similarity)                                          |
| N | Q6GEW8 | CC | F-type ATPases consist of two structural domains, F(1) containing the extramembraneous catalytic core and F(0) containing the membrane proton channel, linked together by a central stalk and a peripheral stalk |
| N | Q6GEW8 | DE | ATP synthase F(0) sector subunit b;                                                                                                                                                                              |

|   |        |    |                                                                                                                                                                                                                                                                                                                                                                   |
|---|--------|----|-------------------------------------------------------------------------------------------------------------------------------------------------------------------------------------------------------------------------------------------------------------------------------------------------------------------------------------------------------------------|
| N | Q6GEW8 | DE | ATP synthase subunit b;                                                                                                                                                                                                                                                                                                                                           |
| N | Q6GEW8 | DE | ATPase subunit I;                                                                                                                                                                                                                                                                                                                                                 |
| N | Q6GEW8 | DE | F-ATPase subunit b;                                                                                                                                                                                                                                                                                                                                               |
| N | Q6GEW8 | DE | F-type ATPase subunit b;                                                                                                                                                                                                                                                                                                                                          |
| N | Q6GEW8 | DR | ATP synthesis coupled proton transport                                                                                                                                                                                                                                                                                                                            |
| N | Q6GEW8 | DR | hydrogen ion transmembrane transporter activity                                                                                                                                                                                                                                                                                                                   |
| N | Q6GFH7 | DE | UPF0435 protein SAR1970;                                                                                                                                                                                                                                                                                                                                          |
| N | Q6GFX9 | CC | Catalyzes the attachment of tyrosine to tRNA(Tyr) in a two-step reaction: tyrosine is first activated by ATP to form Tyr- AMP and then transferred to the acceptor end of tRNA(Tyr) (By similarity).                                                                                                                                                              |
| N | Q6GFX9 | DE | Tyrosine--tRNA ligase;                                                                                                                                                                                                                                                                                                                                            |
| N | Q6GFX9 | DE | Tyrosyl-tRNA synthetase;                                                                                                                                                                                                                                                                                                                                          |
| N | Q6GFX9 | DR | tyrosine-tRNA ligase activity                                                                                                                                                                                                                                                                                                                                     |
| N | Q6GFX9 | DR | tyrosyl-tRNA aminoacylation                                                                                                                                                                                                                                                                                                                                       |
| N | Q6GG60 | CC | An essential GTPase which binds GTP, GDP and possibly (p)ppGpp with moderate affinity, with high nucleotide exchange rates and a fairly low GTP hydrolysis rate (By similarity)<br>it may play a role in control of the cell cycle, stress response, ribosome biogenesis and in those bacteria that undergo differentiation, in morphogenesis control (Potential) |
| N | Q6GG60 | CC | GTP-binding protein obg;                                                                                                                                                                                                                                                                                                                                          |
| N | Q6GG60 | DE | GTPase activity                                                                                                                                                                                                                                                                                                                                                   |
| N | Q6GG60 | DR | GTPase activity                                                                                                                                                                                                                                                                                                                                                   |
| N | Q6GG60 | DR | magnesium ion binding                                                                                                                                                                                                                                                                                                                                             |
| N | Q6GHJ0 | DE | Succinyl-CoA ligase [ADP-forming] subunit beta;                                                                                                                                                                                                                                                                                                                   |
| N | Q6GHJ0 | DE | Succinyl-CoA synthetase subunit beta;                                                                                                                                                                                                                                                                                                                             |
| N | Q6GHJ0 | DR | metal ion binding                                                                                                                                                                                                                                                                                                                                                 |
| N | Q6GHJ0 | DR | succinate-CoA ligase (ADP-forming) activity                                                                                                                                                                                                                                                                                                                       |
| N | Q6GHJ0 | DR | tricarboxylic acid cycle                                                                                                                                                                                                                                                                                                                                          |
| N | Q6GHN0 | CC | Catalyzes the transfer of a ribosyl pnospnate group from 5-phosphoribose 1-diphosphate to orotate, leading to the formation of orotidine monophosphate (OMP) (By similarity).                                                                                                                                                                                     |
| N | Q6GHN0 | DE | Orotate phosphoribosyltransferase;                                                                                                                                                                                                                                                                                                                                |
| N | Q6GHN0 | DR | nucleoside metabolic process                                                                                                                                                                                                                                                                                                                                      |
| N | Q6GHN0 | DR | orotate phosphoribosyltransferase activity                                                                                                                                                                                                                                                                                                                        |
| N | Q6GHN0 | DR | pyrimidine nucleotide biosynthetic process                                                                                                                                                                                                                                                                                                                        |
| N | Q6GI10 | DE | Glycinamide ribonucleotide synthetase;                                                                                                                                                                                                                                                                                                                            |
| N | Q6GI10 | DE | Phosphoribosylamine--glycine ligase;                                                                                                                                                                                                                                                                                                                              |
| N | Q6GI10 | DE | Phosphoribosylglycinamide synthetase;                                                                                                                                                                                                                                                                                                                             |
| N | Q6GI10 | DR | metal ion binding                                                                                                                                                                                                                                                                                                                                                 |
| N | Q6GI10 | DR | phosphoribosylamine-glycine ligase activity                                                                                                                                                                                                                                                                                                                       |
| N | Q6GI10 | DR | purine base biosynthetic process                                                                                                                                                                                                                                                                                                                                  |
| N | Q6GI10 | DR | purine nucleotide biosynthetic process                                                                                                                                                                                                                                                                                                                            |
| N | Q6GJI5 | CC | Involved in initiation control of chromosome replication (By similarity).                                                                                                                                                                                                                                                                                         |
| N | Q6GJI5 | DE | Initiation-control protein yabA;                                                                                                                                                                                                                                                                                                                                  |
| N | Q6GJI5 | DR | DNA replication                                                                                                                                                                                                                                                                                                                                                   |
| N | Q6GK90 | DE | Formate acetyltransferase;                                                                                                                                                                                                                                                                                                                                        |
| N | Q6GK90 | DE | Pyruvate formate-lyase;                                                                                                                                                                                                                                                                                                                                           |
| N | Q6GK90 | DR | formate C-acetyltransferase activity                                                                                                                                                                                                                                                                                                                              |
| N | Q6GK90 | DR | glucose metabolic process                                                                                                                                                                                                                                                                                                                                         |
| N | Q6GKC4 | DE | Acetylglutamate kinase;                                                                                                                                                                                                                                                                                                                                           |
| N | Q6GKC4 | DE | N-acetyl-L-glutamate 5-phosphotransferase;                                                                                                                                                                                                                                                                                                                        |
| N | Q6GKC4 | DR | acetylglutamate kinase activity                                                                                                                                                                                                                                                                                                                                   |
| N | Q6GKC4 | DR | arginine biosynthetic process                                                                                                                                                                                                                                                                                                                                     |
| N | Q6GKH9 | CC | Catalyzes the irreversible reduction of 2,3-butanediol to (S)-acetoin in the presence of NADH (By similarity).                                                                                                                                                                                                                                                    |
| N | Q6GKH9 | DE | Acetoin(diacetyl) reductase;                                                                                                                                                                                                                                                                                                                                      |
| N | Q6GKH9 | DE | Diacetyl reductase [(S)-acetoin forming];                                                                                                                                                                                                                                                                                                                         |
| N | Q6GKH9 | DE | Meso-2,3-butanediol dehydrogenase;                                                                                                                                                                                                                                                                                                                                |
| N | Q6GKH9 | DR | acetoin catabolic process                                                                                                                                                                                                                                                                                                                                         |
| N | Q6GKH9 | DR | diacetyl reductase ((S)-acetoin forming) activity                                                                                                                                                                                                                                                                                                                 |
| N | Q6GKH9 | DR | oxidation-reduction process                                                                                                                                                                                                                                                                                                                                       |
| N | Q6GKS1 | CC | Specifically methylates the pseudouridine at position 1915 (m3Psi1915) in 23S rRNA (By similarity).                                                                                                                                                                                                                                                               |
| N | Q6GKS1 | DE | 23S rRNA m3Psi1915 methyltransferase;                                                                                                                                                                                                                                                                                                                             |
| N | Q6GKS1 | DE | Ribosomal RNA large subunit methyltransferase H;                                                                                                                                                                                                                                                                                                                  |
| N | Q6GKS1 | DE | rRNA (pseudouridine-N3-)-methyltransferase rlmH;                                                                                                                                                                                                                                                                                                                  |
| N | Q6GKS1 | DR | methyltransferase activity                                                                                                                                                                                                                                                                                                                                        |

|   |        |    |                                                                                                                                                                                                                                 |
|---|--------|----|---------------------------------------------------------------------------------------------------------------------------------------------------------------------------------------------------------------------------------|
| N | Q6GKS1 | DR | rRNA methylation                                                                                                                                                                                                                |
| N | Q6GL44 | CC | May play a role as regulator of the innate immune system                                                                                                                                                                        |
| N | Q6GL44 | CC | Has deubiquitinating activity that is directed towards 'Lys-63'-linked polyubiquitin chains (By similarity).                                                                                                                    |
| N | Q6GL44 | DE | Deubiquitinating enzyme A;                                                                                                                                                                                                      |
| N | Q6GL44 | DE | OTU domain-containing protein 5;                                                                                                                                                                                                |
| N | Q6GL44 | DR | cysteine-type peptidase activity                                                                                                                                                                                                |
| N | Q6GMF8 | CC | Not expected to have protease activity (By similarity).                                                                                                                                                                         |
| N | Q6GMF8 | DE | Rhomboid family member 1;                                                                                                                                                                                                       |
| N | Q6GMF8 | DR | serine-type endopeptidase activity                                                                                                                                                                                              |
| N | Q6GMG8 | CC | Probable role in regulating transcription of specific genes (By similarity).                                                                                                                                                    |
| N | Q6GMG8 | DE | LPS-induced TNF-alpha factor homolog;                                                                                                                                                                                           |
| N | Q6GMG8 | DE | Lipopolysaccharide-induced tumor necrosis factor-alpha factor homolog;                                                                                                                                                          |
| N | Q6GPP1 | CC | May be involved in telomere length regulation Promotes assembly, stabilizes and maintains the activity of TORC complexes, which regulate cell growth and survival in response to nutrient and hormonal signals (By similarity). |
| N | Q6GPP1 | DE | Telomere length regulation protein TEL2 homolog;                                                                                                                                                                                |
| N | Q6GUR1 | CC | Cytochromes P450 are a group of heme-thiolate monooxygenases                                                                                                                                                                    |
| N | Q6GUR1 | CC | In liver microsomes, this enzyme is involved in an NADPH-dependent electron transport pathway                                                                                                                                   |
| N | Q6GUR1 | CC | It oxidizes a variety of structurally unrelated compounds, including steroids, fatty acids, and xenobiotics.                                                                                                                    |
| N | Q6GUR1 | DE | Cytochrome P450 1A1;                                                                                                                                                                                                            |
| N | Q6GUR1 | DR | aromatase activity                                                                                                                                                                                                              |
| N | Q6GUR1 | DR | electron carrier activity                                                                                                                                                                                                       |
| N | Q6GUR1 | DR | oxidation-reduction process                                                                                                                                                                                                     |
| N | Q6GV10 | CC | Catalyzes the formation of S-adenosylmethionine from methionine and ATP                                                                                                                                                         |
| N | Q6GV10 | CC | The overall synthetic reaction is composed of two sequential steps, AdoMet formation and the subsequent tripolyphosphate hydrolysis which occurs prior to release of AdoMet from the enzyme (By similarity).                    |
| N | Q6GV10 | DE | AdoMet synthase;                                                                                                                                                                                                                |
| N | Q6GV10 | DE | Methionine adenosyltransferase;                                                                                                                                                                                                 |
| N | Q6GV10 | DE | S-adenosylmethionine synthase;                                                                                                                                                                                                  |
| N | Q6GV10 | DR | metal ion binding                                                                                                                                                                                                               |
| N | Q6GV10 | DR | methionine adenosyltransferase activity                                                                                                                                                                                         |
| N | Q6GV10 | DR | one-carbon metabolic process                                                                                                                                                                                                    |
| N | Q6HAW8 | DE | UPF0340 protein BT9727_4999;                                                                                                                                                                                                    |
| N | Q6HBF3 | CC | Catalyzes the reversible conversion of 2- phosphoglycerate into phosphoenolpyruvate                                                                                                                                             |
| N | Q6HBF3 | CC | It is essential for the degradation of carbohydrates via glycolysis (By similarity).                                                                                                                                            |
| N | Q6HBF3 | DE | 2-phospho-D-glycerate hydro-lyase;                                                                                                                                                                                              |
| N | Q6HBF3 | DE | 2-phosphoglycerate dehydratase;                                                                                                                                                                                                 |
| N | Q6HBF3 | DR | magnesium ion binding                                                                                                                                                                                                           |
| N | Q6HBF3 | DR | phosphopyruvate hydratase activity                                                                                                                                                                                              |
| N | Q6HER5 | CC | Cell division protein that is part of the divisome complex and is recruited early to the Z-ring                                                                                                                                 |
| N | Q6HER5 | CC | Its function overlaps with ftsA (By similarity).                                                                                                                                                                                |
| N | Q6HER5 | CC | Probably stimulates Z-ring formation, perhaps through the cross-linking of ftsZ protofilaments                                                                                                                                  |
| N | Q6HER5 | DE | Cell division protein sepF;                                                                                                                                                                                                     |
| N | Q6HER5 | DR | barrier septum formation                                                                                                                                                                                                        |
| N | Q6IF99 | CC | Odorant receptor (Potential).                                                                                                                                                                                                   |
| N | Q6IF99 | DE | Olfactory receptor 10K2;                                                                                                                                                                                                        |
| N | Q6IF99 | DE | Olfactory receptor OR1-4;                                                                                                                                                                                                       |
| N | Q6IF99 | DR | olfactory receptor activity                                                                                                                                                                                                     |
| N | Q6IF99 | DR | sensory perception of smell                                                                                                                                                                                                     |
| N | Q6IG03 | CC | Has a role in hair formation                                                                                                                                                                                                    |
| N | Q6IG03 | CC | Specific component of keratin intermediate filaments in the inner root sheath (IRS) of the hair follicle (By similarity).                                                                                                       |
| N | Q6IG03 | DE | Cytokeratin-73;                                                                                                                                                                                                                 |
| N | Q6IG03 | DE | Keratin, type II cytoskeletal 73;                                                                                                                                                                                               |
| N | Q6IG03 | DE | Type II inner root sheath-specific keratin-K6irs3;                                                                                                                                                                              |
| N | Q6IG03 | DE | Type-II keratin Kb36;                                                                                                                                                                                                           |
| N | Q6IG03 | DR | structural molecule activity                                                                                                                                                                                                    |
| N | Q6IPR1 | DE | LYR motif-containing protein 5;                                                                                                                                                                                                 |
| N | Q6ITB0 | CC | Serine protease inhibitor (Potential).                                                                                                                                                                                          |



|   |        |    |                                                                                                                                                                                                                          |
|---|--------|----|--------------------------------------------------------------------------------------------------------------------------------------------------------------------------------------------------------------------------|
| N | Q6ITB0 | DE | Carinatin-1;                                                                                                                                                                                                             |
| N | Q6ITB0 | DR | serine-type endopeptidase inhibitor activity                                                                                                                                                                             |
| N | Q6K0P9 | CC | Major mediator of the tumor suppressor activity of IFN in breast cancer cells                                                                                                                                            |
| N | Q6K0P9 | CC | Promotes ubiquitination and subsequent degradation of HDAC1, which in turn enhances maspin expression, and impairs invasive activity of cancer cells.                                                                    |
| N | Q6K0P9 | CC | Promotes ubiquitination and subsequent degradation of MDM2, which leads to p53/TP53 stabilization                                                                                                                        |
| N | Q6K0P9 | DE | Interferon-inducible protein X;                                                                                                                                                                                          |
| N | Q6K0P9 | DE | Pyrin and HIN domain-containing protein 1;                                                                                                                                                                               |
| N | Q6K6N7 | DE | Probable protein phosphatase 2C 14;                                                                                                                                                                                      |
| N | Q6K6N7 | DR | metal ion binding                                                                                                                                                                                                        |
| N | Q6K6N7 | DR | phosphoprotein phosphatase activity                                                                                                                                                                                      |
| N | Q6K953 | CC | Has a glutathione-disulfide oxidoreductase activity in the presence of NADPH and glutathione reductase                                                                                                                   |
| N | Q6K953 | CC | Reduces low molecular weight disulfides and proteins (By similarity).                                                                                                                                                    |
| N | Q6K953 | DE | Glutaredoxin-C2 homolog 2;                                                                                                                                                                                               |
| N | Q6K953 | DE | Glutaredoxin-C4, chloroplastic;                                                                                                                                                                                          |
| N | Q6K953 | DR | cell redox homeostasis                                                                                                                                                                                                   |
| N | Q6K953 | DR | electron carrier activity                                                                                                                                                                                                |
| N | Q6K953 | DR | electron transport chain                                                                                                                                                                                                 |
| N | Q6K953 | DR | protein disulfide oxidoreductase activity                                                                                                                                                                                |
| N | Q6KHH5 | CC | One of the primary rRNA binding proteins, it binds directly to 16S rRNA where it helps nucleate assembly of the platform of the 30S subunit by binding and bridging several RNA helices of the 16S rRNA (By similarity). |
| N | Q6KHH5 | DE | 30S ribosomal protein S15;                                                                                                                                                                                               |
| N | Q6KHH5 | DR | structural constituent of ribosome                                                                                                                                                                                       |
| N | Q6KI81 | CC | produces ATP from ADP in the presence of a proton gradient across the membrane                                                                                                                                           |
| N | Q6KI81 | CC | The gamma chain is believed to be important in regulating ATPase activity and the flow of protons through the CF(0) complex.                                                                                             |
| N | Q6KI81 | DE | ATP synthase F1 sector gamma subunit;                                                                                                                                                                                    |
| N | Q6KI81 | DE | ATP synthase gamma chain;                                                                                                                                                                                                |
| N | Q6KI81 | DE | F-ATPase gamma subunit;                                                                                                                                                                                                  |
| N | Q6KI81 | DR | ATP synthesis coupled proton transport                                                                                                                                                                                   |
| N | Q6KI81 | DR | hydrogen ion transporting ATP synthase activity, rotational mechanism                                                                                                                                                    |
| N | Q6KI81 | DR | proton-transporting ATPase activity, rotational mechanism                                                                                                                                                                |
| N | Q6L0L2 | DE | UPF0215 protein PTO0905;                                                                                                                                                                                                 |
| N | Q6L0R4 | CC | With S4 and S5 plays an important role in translational accuracy                                                                                                                                                         |
| N | Q6L0R4 | CC | Located at the interface of the 30S and 50S subunits (By similarity).                                                                                                                                                    |
| N | Q6L0R4 | DE | 30S ribosomal protein S12P;                                                                                                                                                                                              |
| N | Q6L0R4 | DR | structural constituent of ribosome                                                                                                                                                                                       |
| N | Q6L708 | CC | Plays a major role in tight junction-specific obliteration of the intercellular space, through calcium- independent cell-adhesion activity (By similarity).                                                              |
| N | Q6L708 | DR | calcium-independent cell-cell adhesion                                                                                                                                                                                   |
| N | Q6L708 | DR | identical protein binding                                                                                                                                                                                                |
| N | Q6L708 | DR | structural molecule activity                                                                                                                                                                                             |
| N | Q6LFS0 | CC | Catalyzes the oxidation of either pyridoxine 5'-phosphate (PNP) or pyridoxamine 5'-phosphate (PMP) into pyridoxal 5'-phosphate (PLP) (By similarity)                                                                     |
| N | Q6LFS0 | DE | PNP/PMP oxidase;                                                                                                                                                                                                         |
| N | Q6LFS0 | DE | Pyridoxal 5'-phosphate synthase;                                                                                                                                                                                         |
| N | Q6LFS0 | DE | Pyridoxine/pyridoxamine 5'-phosphate oxidase;                                                                                                                                                                            |
| N | Q6LFS0 | DR | oxidation-reduction process                                                                                                                                                                                              |
| N | Q6LFS0 | DR | pyridoxamine-phosphate oxidase activity                                                                                                                                                                                  |
| N | Q6LFS0 | DR | pyridoxine biosynthetic process                                                                                                                                                                                          |
| N | Q6LLT9 | CC | Conversion of NADPH, generated by peripheral catabolic pathways, to NADH, which can enter the respiratory chain for energy generation (By similarity).                                                                   |
| N | Q6LLT9 | DE | NAD(P)(+) transhydrogenase [B-specific];                                                                                                                                                                                 |
| N | Q6LLT9 | DE | Soluble pyridine nucleotide transhydrogenase;                                                                                                                                                                            |
| N | Q6LLT9 | DR | NAD(P)+ transhydrogenase (B-specific) activity                                                                                                                                                                           |
| N | Q6LLT9 | DR | cell redox homeostasis                                                                                                                                                                                                   |
| N | Q6LLT9 | DR | flavin adenine dinucleotide binding                                                                                                                                                                                      |
| N | Q6LLT9 | DR | oxidation-reduction process                                                                                                                                                                                              |
| N | Q6LMV7 | DE | 30S ribosomal protein S16;                                                                                                                                                                                               |
| N | Q6LMV7 | DR | structural constituent of ribosome                                                                                                                                                                                       |
| N | Q6LN41 | CC | Ligates lysine onto the cytidine present at position 34 of the AUA codon-specific tRNA(Ile) that contains the anticodon CAU, in an ATP-dependent manner                                                                  |

|   |        |    |                                                                                                                                                                                                                                                         |
|---|--------|----|---------------------------------------------------------------------------------------------------------------------------------------------------------------------------------------------------------------------------------------------------------|
| N | Q6LN41 | CC | Cytidine is converted to lysidine, thus changing the amino acid specificity of the tRNA from methionine to isoleucine (By similarity).                                                                                                                  |
| N | Q6LN41 | DE | tRNA(Ile)-2-lysyl-cytidine synthase;                                                                                                                                                                                                                    |
| N | Q6LN41 | DE | tRNA(Ile)-lysidine synthase;                                                                                                                                                                                                                            |
| N | Q6LN41 | DE | tRNA(Ile)-lysidine synthetase;                                                                                                                                                                                                                          |
| N | Q6LN41 | DR | ligase activity, forming carbon-nitrogen bonds                                                                                                                                                                                                          |
| N | Q6LN41 | DR | tRNA processing                                                                                                                                                                                                                                         |
| N | Q6LQ38 | DE | Acylphosphatase;                                                                                                                                                                                                                                        |
| N | Q6LQ38 | DE | Acylphosphate phosphohydrolase;                                                                                                                                                                                                                         |
| N | Q6LQ38 | DR | acylphosphatase activity                                                                                                                                                                                                                                |
| N | Q6LU16 | CC | Negatively regulates transcription of bacterial ribonucleotide reductase nrd genes and operons by binding to NrdR- boxes (By similarity).                                                                                                               |
| N | Q6LU16 | DE | Transcriptional repressor NrdR;                                                                                                                                                                                                                         |
| N | Q6LU16 | DR | transcription repressor activity                                                                                                                                                                                                                        |
| N | Q6LU16 | DR | zinc ion binding                                                                                                                                                                                                                                        |
| N | Q6LWJ8 | CC | Sliding clamp subunit                                                                                                                                                                                                                                   |
| N | Q6LWJ8 | CC | Responsible for tethering the catalytic subunit of DNA polymerase to DNA during high-speed replication (By similarity).                                                                                                                                 |
| N | Q6LWJ8 | DE | DNA polymerase sliding clamp;                                                                                                                                                                                                                           |
| N | Q6LWJ8 | DE | Proliferating cell nuclear antigen homolog;                                                                                                                                                                                                             |
| N | Q6LWJ8 | DR | DNA polymerase processivity factor activity                                                                                                                                                                                                             |
| N | Q6LWJ8 | DR | DNA replication                                                                                                                                                                                                                                         |
| N | Q6LWJ8 | DR | regulation of DNA replication                                                                                                                                                                                                                           |
| N | Q6LX61 | CC | Catalyzes the deamination of 5-methylthioadenosine and S-adenosyl-L-homocysteine into 5-methylthioinosine and S-inosyl-L-homocysteine, respectively.                                                                                                    |
| N | Q6LX61 | CC | Is also able to deaminate adenosine (By similarity).                                                                                                                                                                                                    |
| N | Q6LX61 | DE | 5-methylthioadenosine/S-adenosylhomocysteine deaminase;                                                                                                                                                                                                 |
| N | Q6LX61 | DE | MTA/SAH deaminase;                                                                                                                                                                                                                                      |
| N | Q6LX61 | DR | S-adenosylhomocysteine deaminase activity                                                                                                                                                                                                               |
| N | Q6LX61 | DR | metal ion binding                                                                                                                                                                                                                                       |
| N | Q6LXW0 | DE | UPF0280 protein MMP1236;                                                                                                                                                                                                                                |
| N | Q6LXW0 | DR | thiamine biosynthetic process                                                                                                                                                                                                                           |
| N | Q6M116 | CC | Catalyzes the methyl esterification of L-isoaspartyl residues in peptides and proteins that result from spontaneous decomposition of normal L-aspartyl and L-asparaginyl residues in the repair and/or degradation of damaged proteins (By similarity). |
| N | Q6M116 | CC | L-isoaspartyl protein carboxyl methyltransferase;                                                                                                                                                                                                       |
| N | Q6M116 | DE | Protein L-isoaspartyl methyltransferase;                                                                                                                                                                                                                |
| N | Q6M116 | DE | Protein-L-isoaspartate O-methyltransferase;                                                                                                                                                                                                             |
| N | Q6M116 | DE | Protein-beta-aspartate methyltransferase;                                                                                                                                                                                                               |
| N | Q6M116 | DR | protein-L-isoaspartate (D-aspartate) O-methyltransferase activity                                                                                                                                                                                       |
| N | Q6MB12 | CC | Catalyzes the decarboxylation of four acetate groups of uroporphyrinogen-III to yield coproporphyrinogen-III (By similarity).                                                                                                                           |
| N | Q6MB12 | DE | Uroporphyrinogen decarboxylase;                                                                                                                                                                                                                         |
| N | Q6MB12 | DR | porphyrin biosynthetic process                                                                                                                                                                                                                          |
| N | Q6MB12 | DR | uroporphyrinogen decarboxylase activity                                                                                                                                                                                                                 |
| N | Q6MVL6 | DE | Putative uncharacterized protein B8J22.070;                                                                                                                                                                                                             |
| N | Q6N4Q4 | CC | This protein promotes the GTP-dependent binding of aminoacyl-tRNA to the A-site of ribosomes during protein biosynthesis (By similarity).                                                                                                               |
| N | Q6N4Q4 | DE | Elongation factor Tu;                                                                                                                                                                                                                                   |
| N | Q6N4Q4 | DR | GTPase activity                                                                                                                                                                                                                                         |
| N | Q6N4Q4 | DR | translation elongation factor activity                                                                                                                                                                                                                  |
| N | Q6N693 | CC | Interconversion of serine and glycine.                                                                                                                                                                                                                  |
| N | Q6N693 | DE | Serine hydroxymethyltransferase 1;                                                                                                                                                                                                                      |
| N | Q6N693 | DE | Serine methylase 1;                                                                                                                                                                                                                                     |
| N | Q6N693 | DR | L-serine metabolic process                                                                                                                                                                                                                              |
| N | Q6N693 | DR | glycine hydroxymethyltransferase activity                                                                                                                                                                                                               |
| N | Q6N693 | DR | glycine metabolic process                                                                                                                                                                                                                               |
| N | Q6N693 | DR | one-carbon metabolic process                                                                                                                                                                                                                            |
| N | Q6N693 | DR | pyridoxal phosphate binding                                                                                                                                                                                                                             |
| N | Q6NBF3 | CC | Catalyzes the ferrous insertion into protoporphyrin IX.                                                                                                                                                                                                 |
| N | Q6NBF3 | DE | Ferrochelatase;                                                                                                                                                                                                                                         |
| N | Q6NBF3 | DE | Heme synthase;                                                                                                                                                                                                                                          |
| N | Q6NBF3 | DE | Protoheme ferro-lyase;                                                                                                                                                                                                                                  |
| N | Q6NBF3 | DR | ferrochelatase activity                                                                                                                                                                                                                                 |
| N | Q6NBF3 | DR | heme biosynthetic process                                                                                                                                                                                                                               |

|   |        |    |                                                                                                                                                                                                                                                                                                                 |
|---|--------|----|-----------------------------------------------------------------------------------------------------------------------------------------------------------------------------------------------------------------------------------------------------------------------------------------------------------------|
| N | Q6NBF3 | DR | metal ion binding                                                                                                                                                                                                                                                                                               |
| N | Q6NDM1 | CC | involved in base excision repair of DNA damaged by oxidation or by mutagenic agents                                                                                                                                                                                                                             |
| N | Q6NDM1 | CC | Acts as DNA glycosylase that recognizes and removes damaged bases                                                                                                                                                                                                                                               |
| N | Q6NDM1 | CC | Cleaves the DNA backbone by beta-delta elimination to generate a single-strand break at the site of the removed base with both 3'- and 5'-phosphates (By similarity)                                                                                                                                            |
| N | Q6NDM1 | CC | Has AP (apurinic/apyrimidinic) lyase activity and introduces nicks in the DNA                                                                                                                                                                                                                                   |
| N | Q6NDM1 | CC | Has a preference for oxidized purines, such as 7,8-dihydro-8-oxoguanine (8-oxo-dG)                                                                                                                                                                                                                              |
| N | Q6NDM1 | DE | AP lyase mutM;                                                                                                                                                                                                                                                                                                  |
| N | Q6NDM1 | DE | DNA-(apurinic or apyrimidinic site) lyase mutM;                                                                                                                                                                                                                                                                 |
| N | Q6NDM1 | DE | Fapy-DNA glycosylase;                                                                                                                                                                                                                                                                                           |
| N | Q6NDM1 | DE | Formamidopyrimidine-DNA glycosylase;                                                                                                                                                                                                                                                                            |
| N | Q6NDM1 | DR | base-excision repair                                                                                                                                                                                                                                                                                            |
| N | Q6NDM1 | DR | damaged DNA binding                                                                                                                                                                                                                                                                                             |
| N | Q6NDM1 | DR | nucleotide-excision repair                                                                                                                                                                                                                                                                                      |
| N | Q6NDM1 | DR | oxidized purine base lesion DNA N-glycosylase activity                                                                                                                                                                                                                                                          |
| N | Q6NDM1 | DR | zinc ion binding                                                                                                                                                                                                                                                                                                |
| N | Q6NDM2 | CC | Methyltransferase required for the conversion of dimethylmenaquinone (DMKH2) to menaquinone (MKH2) and the conversion of 2-polyprenyl-6-methoxy-1,4-benzoquinol (DDMQH2) to 2-polyprenyl-3-methyl-6-methoxy-1,4-benzoquinol (DMQH2) (By similarity).                                                            |
| N | Q6NDM2 | DE | Ubiquinone/menaquinone biosynthesis methyltransferase ubiE;                                                                                                                                                                                                                                                     |
| N | Q6NDM2 | DR | menaquinone biosynthetic process                                                                                                                                                                                                                                                                                |
| N | Q6NDM2 | DR | methyltransferase activity                                                                                                                                                                                                                                                                                      |
| N | Q6NDM2 | DR | ubiquinone biosynthetic process                                                                                                                                                                                                                                                                                 |
| N | Q6NGI5 | CC | Specifically methylates guanosine-37 in various tRNAs (By similarity).                                                                                                                                                                                                                                          |
| N | Q6NGI5 | DE | M1G-methyltransferase;                                                                                                                                                                                                                                                                                          |
| N | Q6NGI5 | DE | tRNA (guanine-N(1)-)-methyltransferase;                                                                                                                                                                                                                                                                         |
| N | Q6NGI5 | DE | tRNA [GM37] methyltransferase;                                                                                                                                                                                                                                                                                  |
| N | Q6NGI5 | DR | tRNA (guanine-N1-)-methyltransferase activity                                                                                                                                                                                                                                                                   |
| N | Q6NGR0 | CC | Catalyzes the methylthiolation of N6- (dimethylallyl)adenosine (i(6)A), leading to the formation of 2- methylthio-N6-(dimethylallyl)adenosine (ms(2)i(6)A) at position 37 in tRNAs that read codons beginning with uridine (By similarity).                                                                     |
| N | Q6NGR0 | DE | (Dimethylallyl)adenosine tRNA methylthiotransferase miaB;                                                                                                                                                                                                                                                       |
| N | Q6NGR0 | DE | tRNA-i(6)A37 methylthiotransferase;                                                                                                                                                                                                                                                                             |
| N | Q6NGR0 | DR | 4 iron, 4 sulfur cluster binding                                                                                                                                                                                                                                                                                |
| N | Q6NGR0 | DR | metal ion binding                                                                                                                                                                                                                                                                                               |
| N | Q6NGR0 | DR | tRNA modification                                                                                                                                                                                                                                                                                               |
| N | Q6NGR0 | DR | transferase activity                                                                                                                                                                                                                                                                                            |
| N | Q6NHG5 | CC | Regulates arginine biosynthesis genes (By similarity).                                                                                                                                                                                                                                                          |
| N | Q6NHG5 | DE | Arginine repressor;                                                                                                                                                                                                                                                                                             |
| N | Q6NHG5 | DR | arginine biosynthetic process                                                                                                                                                                                                                                                                                   |
| N | Q6NHG5 | DR | regulation of transcription, DNA-dependent                                                                                                                                                                                                                                                                      |
| N | Q6NHG5 | DR | sequence-specific DNA binding transcription factor activity                                                                                                                                                                                                                                                     |
| N | Q6NPT8 | CC | Component of SCF(ASK-cullin-F-box) E3 ubiquitin ligase complexes, which may mediate the ubiquitination and subsequent proteasomal degradation of target proteins (By similarity).                                                                                                                               |
| N | Q6NPT8 | DE | F-box protein PP2-B1;                                                                                                                                                                                                                                                                                           |
| N | Q6NPT8 | DE | Protein PHLOEM PROTEIN 2-LIKE B1;                                                                                                                                                                                                                                                                               |
| N | Q6NPT8 | DE | SKP1-interacting partner 21;                                                                                                                                                                                                                                                                                    |
| N | Q6NUD8 | CC | Probable peripherally associated component of the endosomal sorting required for transport complex III (ESCRT-III) which is involved in multivesicular bodies (MVBs) formation and sorting of endosomal cargo proteins into MVBs                                                                                |
| N | Q6NUD8 | CC | MVBs contain intraluminal vesicles (ILVs) that are generated by invagination and scission from the limiting membrane of the endosome and mostly are delivered to lysosomes enabling degradation of membrane proteins, such as stimulated growth factor receptors, lysosomal enzymes and lipids (By similarity). |
| N | Q6NUD8 | DE | Charged multivesicular body protein 1a;                                                                                                                                                                                                                                                                         |
| N | Q6NUD8 | DE | Chromatin-modifying protein 1a;                                                                                                                                                                                                                                                                                 |
| N | Q6NUD8 | DR | protein transport                                                                                                                                                                                                                                                                                               |
| N | Q6NV72 | DE | WD repeat-containing protein C2orf44 homolog;                                                                                                                                                                                                                                                                   |
| N | Q6NXR2 | DE | STAG3-like protein 1;                                                                                                                                                                                                                                                                                           |
| N | Q6NXR2 | DE | STAG3-like protein 2;                                                                                                                                                                                                                                                                                           |
| N | Q6NXR2 | DE | STAG3-like protein 3;                                                                                                                                                                                                                                                                                           |
| N | Q6NXR2 | DE | Stromal antigen 3-like protein 1;                                                                                                                                                                                                                                                                               |
| N | Q6NXR2 | DE | Stromal antigen 3-like protein 2;                                                                                                                                                                                                                                                                               |

|   |        |    |                                                                                                                                                                                                                                                     |
|---|--------|----|-----------------------------------------------------------------------------------------------------------------------------------------------------------------------------------------------------------------------------------------------------|
| N | Q6NXR2 | DE | Stromal antigen 3-like protein 3;                                                                                                                                                                                                                   |
| N | Q6NYZ4 | CC | Hydrolyzes the ester bond at the sn-1 position of glycerophospholipids and produces 2-acyl lysophospholipids (By similarity).                                                                                                                       |
| N | Q6NYZ4 | DE | Phospholipase A1 member A;                                                                                                                                                                                                                          |
| N | Q6NYZ4 | DR | hydrolase activity                                                                                                                                                                                                                                  |
| N | Q6NYZ4 | DR | lipid catabolic process                                                                                                                                                                                                                             |
| N | Q6P0H6 | CC | Component of the COP9 signalosome complex (CSN), a complex involved in various cellular and developmental processes                                                                                                                                 |
| N | Q6P0H6 | CC | The CSN complex is an essential regulator of the ubiquitin (Ubl) conjugation pathway by mediating the deneddylation of the cullin subunits of E3 ligase complexes, leading to modify the Ubl ligase activity (By similarity).                       |
| N | Q6P0H6 | DE | COP9 signalosome complex subunit 4;                                                                                                                                                                                                                 |
| N | Q6P0H6 | DE | Signalosome subunit 4;                                                                                                                                                                                                                              |
| N | Q6P1V3 | CC | Probable substrate-recognition component of a SCF-like E3 (Elongin-Cullin-SOCS-box protein) E3 ubiquitin-protein ligase complex which mediates the ubiquitination and subsequent proteasomal degradation of target proteins (By similarity)         |
| N | Q6P1V3 | DE | WD repeat and SOCS box-containing protein 1;                                                                                                                                                                                                        |
| N | Q6P1V3 | DR | intracellular signal transduction                                                                                                                                                                                                                   |
| N | Q6P3V2 | CC | May be involved in transcriptional regulation.                                                                                                                                                                                                      |
| N | Q6P3V2 | DE | Zinc finger protein 585A;                                                                                                                                                                                                                           |
| N | Q6P3V2 | DR | nucleic acid binding                                                                                                                                                                                                                                |
| N | Q6P3V2 | DR | regulation of transcription, DNA-dependent                                                                                                                                                                                                          |
| N | Q6P3V2 | DR | zinc ion binding                                                                                                                                                                                                                                    |
| N | Q6P7L9 | CC | Component of the eukaryotic translation initiation factor 3 (eIF-3) complex, which is involved in protein synthesis and, together with other initiation factors, stimulates binding of mRNA and methionyl-tRNAi to the 40S ribosome (By similarity) |
| N | Q6P7L9 | DE | Eukaryotic translation initiation factor 3 subunit 6;                                                                                                                                                                                               |
| N | Q6P7L9 | DE | Eukaryotic translation initiation factor 3 subunit E;                                                                                                                                                                                               |
| N | Q6P7L9 | DR | translation initiation factor activity                                                                                                                                                                                                              |
| N | Q6P9B6 | DE | TLD domain-containing protein KIAA1609;                                                                                                                                                                                                             |
| N | Q6P9B6 | DR | protein binding                                                                                                                                                                                                                                     |
| N | Q6P9V9 | CC | Tubulin is the major constituent of microtubules                                                                                                                                                                                                    |
| N | Q6P9V9 | CC | It binds two moles of GTP, one at an exchangeable site on the beta chain and one at a non-exchangeable site on the alpha-chain.                                                                                                                     |
| N | Q6P9V9 | DE | Alpha-tubulin 2;                                                                                                                                                                                                                                    |
| N | Q6P9V9 | DE | Tubulin alpha-1B chain;                                                                                                                                                                                                                             |
| N | Q6P9V9 | DE | Tubulin alpha-2 chain;                                                                                                                                                                                                                              |
| N | Q6P9V9 | DR | GTPase activity                                                                                                                                                                                                                                     |
| N | Q6P9V9 | DR | microtubule-based movement                                                                                                                                                                                                                          |
| N | Q6P9V9 | DR | protein polymerization                                                                                                                                                                                                                              |
| N | Q6P9V9 | DR | structural molecule activity                                                                                                                                                                                                                        |
| N | Q6PA35 | CC | May be required for the assembly pathway of mitochondrial outer membrane proteins (By similarity).                                                                                                                                                  |
| N | Q6PA35 | DE | Sorting and assembly machinery component 50 homolog B;                                                                                                                                                                                              |
| N | Q6PA79 | CC | Phosphorylates uridine and cytidine to uridine monophosphate and cytidine monophosphate                                                                                                                                                             |
| N | Q6PA79 | CC | Can use ATP or GTP as a phosphate donor (By similarity).                                                                                                                                                                                            |
| N | Q6PA79 | CC | Does not phosphorylate deoxyribonucleosides or purine ribonucleosides                                                                                                                                                                               |
| N | Q6PA79 | DE | Cytidine monophosphokinase 1-A;                                                                                                                                                                                                                     |
| N | Q6PA79 | DE | Uridine monophosphokinase 1-A;                                                                                                                                                                                                                      |
| N | Q6PA79 | DE | Uridine-cytidine kinase 1-A;                                                                                                                                                                                                                        |
| N | Q6PA79 | DR | phosphotransferase activity, alcohol group as acceptor                                                                                                                                                                                              |
| N | Q6PA79 | DR | uridine kinase activity                                                                                                                                                                                                                             |
| N | Q6PAM0 | CC | AMPK is responsible for the regulation of fatty acid synthesis by phosphorylation of acetyl-CoA carboxylase                                                                                                                                         |
| N | Q6PAM0 | CC | Also regulates cholesterol synthesis via phosphorylation and inactivation of hydroxymethylglutaryl-CoA reductase and hormone- sensitive lipase                                                                                                      |
| N | Q6PAM0 | CC | It may also serve as an adapter molecule for the catalytic alpha-subunit (By similarity)                                                                                                                                                            |
| N | Q6PAM0 | CC | This is a regulatory subunit, may be a positive regulator of AMPK activity                                                                                                                                                                          |
| N | Q6PAM0 | DE | 5'-AMP-activated protein kinase subunit beta-2;                                                                                                                                                                                                     |
| N | Q6PAM0 | DE | AMPK subunit beta-2;                                                                                                                                                                                                                                |
| N | Q6PAM0 | DR | AMP-activated protein kinase activity                                                                                                                                                                                                               |
| N | Q6PAM0 | DR | fatty acid biosynthetic process                                                                                                                                                                                                                     |
| N | Q6PAM0 | DR | response to stress                                                                                                                                                                                                                                  |
| N | Q6PB06 | DE | Aminoglycoside phosphotransferase domain-containing protein 1;                                                                                                                                                                                      |

|   |        |    |                                                                                                                                                                                                                |
|---|--------|----|----------------------------------------------------------------------------------------------------------------------------------------------------------------------------------------------------------------|
| N | Q6PB06 | DR | kinase activity                                                                                                                                                                                                |
| N | Q6PBJ2 | DE | UPF0468 protein C16orf80 homolog;                                                                                                                                                                              |
| N | Q6PEW1 | CC | Transcriptional coactivator in the bone morphogenetic protein (BMP)-signaling pathway                                                                                                                          |
| N | Q6PEW1 | CC | It contributes to the BMP-induced enhancement of cholinergic-neuron-specific gene expression (By similarity).                                                                                                  |
| N | Q6PEW1 | CC | It positively modulates BMP signaling by interacting with SMAD1 and associating with CBP in the transcription complex                                                                                          |
| N | Q6PEW1 | DE | Smad-interacting zinc finger protein 1;                                                                                                                                                                        |
| N | Q6PEW1 | DE | Zinc finger CCHC domain-containing protein 12;                                                                                                                                                                 |
| N | Q6PEW1 | DR | nucleic acid binding                                                                                                                                                                                           |
| N | Q6PEW1 | DR | zinc ion binding                                                                                                                                                                                               |
| N | Q6PFH3 | CC | May be involved in ubiquitination and degradation through a DBB1-CUL4 E3 protein-ubiquitin ligase (By similarity).                                                                                             |
| N | Q6PFH3 | DE | DDB1- and CUL4-associated factor 15;                                                                                                                                                                           |
| N | Q6PIU2 | CC | Hydrolyzes 2-acetyl monoalkylglycerol ether, the penultimate precursor of the pathway for de novo synthesis of platelet-activating factor                                                                      |
| N | Q6PIU2 | CC | Also involved in organ detoxification by hydrolyzing exogenous organophosphorus compounds                                                                                                                      |
| N | Q6PIU2 | CC | May be responsible for cholesterol ester hydrolysis in macrophages, thereby contributing to the development of atherosclerosis                                                                                 |
| N | Q6PIU2 | CC | May contribute to cancer pathogenesis by promoting tumor cell migration.                                                                                                                                       |
| N | Q6PIU2 | DE | Arylacetamide deacetylase-like 1;                                                                                                                                                                              |
| N | Q6PIU2 | DE | Neutral cholesterol ester hydrolase 1;                                                                                                                                                                         |
| N | Q6PIU2 | DR | carboxylesterase activity                                                                                                                                                                                      |
| N | Q6PIU2 | DR | lipid catabolic process                                                                                                                                                                                        |
| N | Q6PIJ2 | DE | Uncharacterized protein C14orf43;                                                                                                                                                                              |
| N | Q6PTD4 | CC | Alpha-conotoxins act on postsynaptic membranes, they bind to the nicotinic acetylcholine receptors (nAChR) and thus inhibit them (By similarity).                                                              |
| N | Q6PTD4 | DE | Alpha-conotoxin-like Lp1.2;                                                                                                                                                                                    |
| N | Q6PTD4 | DR | acetylcholine receptor inhibitor activity                                                                                                                                                                      |
| N | Q6PTD4 | DR | synaptic transmission                                                                                                                                                                                          |
| N | Q6Q2J0 | CC | Catalyzes the oxidative deamination of biogenic and xenobiotic amines and has important functions in the metabolism of neuroactive and vasoactive amines in the central nervous system and peripheral tissues  |
| N | Q6Q2J0 | CC | MAOA preferentially oxidizes biogenic amines such as 5-hydroxytryptamine (5-HT), norepinephrine and epinephrine (By similarity).                                                                               |
| N | Q6Q2J0 | DE | Amine oxidase [flavin-containing] A;                                                                                                                                                                           |
| N | Q6Q2J0 | DE | Monoamine oxidase type A;                                                                                                                                                                                      |
| N | Q6Q2J0 | DR | neurotransmitter catabolic process                                                                                                                                                                             |
| N | Q6Q2J0 | DR | oxidation-reduction process                                                                                                                                                                                    |
| N | Q6Q2J0 | DR | oxidoreductase activity                                                                                                                                                                                        |
| N | Q6QLQ5 | CC | Binds bacterial lipopolysaccharide (LPS)                                                                                                                                                                       |
| N | Q6QLQ5 | CC | Has hemolytic activity (in vitro)                                                                                                                                                                              |
| N | Q6QLQ5 | CC | Has potent antimicrobial activity against Gram-positive and Gram-negative bacteria (in vitro)                                                                                                                  |
| N | Q6QLQ5 | CC | May play a role in the innate immune response.                                                                                                                                                                 |
| N | Q6QLQ5 | DE | Cathelicidin-1;                                                                                                                                                                                                |
| N | Q6QLQ5 | DE | Fowlicidin-1;                                                                                                                                                                                                  |
| N | Q6QLQ5 | DR | defense response to bacterium                                                                                                                                                                                  |
| N | Q6QLQ5 | DR | innate immune response                                                                                                                                                                                         |
| N | Q6RY07 | CC | Degrades chitin and chitotriose                                                                                                                                                                                |
| N | Q6RY07 | CC | Contributes to the response to IL-13 and inflammation in response to IL-13                                                                                                                                     |
| N | Q6RY07 | CC | Its function in the inflammatory response and in protecting cells against apoptosis is inhibited by allosamidin, suggesting that the function of this protein depends on carbohydrate binding (By similarity). |
| N | Q6RY07 | CC | May participate in the defense against nematodes, fungi and other pathogens                                                                                                                                    |
| N | Q6RY07 | CC | Plays a role in T helper cell type 2 (Th2) immune response                                                                                                                                                     |
| N | Q6RY07 | CC | Protects lung epithelial cells against apoptosis and promotes phosphorylation of AET1                                                                                                                          |
| N | Q6RY07 | CC | Stimulates chemokine production by pulmonary epithelial cells                                                                                                                                                  |
| N | Q6RY07 | DE | Acidic mammalian chitinase;                                                                                                                                                                                    |
| N | Q6RY07 | DR | cation binding                                                                                                                                                                                                 |
| N | Q6RY07 | DR | chitin binding                                                                                                                                                                                                 |
| N | Q6RY07 | DR | chitin catabolic process                                                                                                                                                                                       |
| N | Q6RY07 | DR | chitinase activity                                                                                                                                                                                             |
| N | Q6RY07 | DR | positive regulation of chemokine secretion                                                                                                                                                                     |

|   |        |    |                                                                                                                                                        |
|---|--------|----|--------------------------------------------------------------------------------------------------------------------------------------------------------|
| N | Q6RY07 | DR | production of molecular mediator involved in inflammatory response                                                                                     |
| N | Q6S001 | CC | microtubule-associated force-producing protein that plays a role in organelle movement                                                                 |
| N | Q6S001 | CC | Its motor activity is directed toward the microtubule's plus end (By similarity).                                                                      |
| N | Q6S001 | DE | Kinesin family member 11;                                                                                                                              |
| N | Q6S001 | DE | Kinesin-related protein 11;                                                                                                                            |
| N | Q6S001 | DR | microtubule motor activity                                                                                                                             |
| N | Q6S001 | DR | microtubule-based movement                                                                                                                             |
| N | Q6TND0 | CC | Usually encoded in the trnK tRNA gene intron                                                                                                           |
| N | Q6TND0 | CC | probably assists in splicing its own and other chloroplast group II introns (By similarity)                                                            |
| N | Q6TND0 | DE | Intron maturase;                                                                                                                                       |
| N | Q6TND0 | DR | mRNA processing                                                                                                                                        |
| N | Q6TND0 | DR | tRNA processing                                                                                                                                        |
| N | Q6UVK1 | CC | Proteoglycan playing a role in cell proliferation and migration which stimulates endothelial cells motility during microvascular morphogenesis         |
| N | Q6UVK1 | CC | Binds through its extracellular N- terminus growth factors, extracellular matrix proteases modulating their activity                                   |
| N | Q6UVK1 | CC | Cell surface receptor for collagen alpha 2(VI) which may confer cells ability to migrate on that substrate                                             |
| N | Q6UVK1 | CC | Functions also as a signal transducing protein by binding through its cytoplasmic C-terminus scaffolding and signaling proteins                        |
| N | Q6UVK1 | CC | May activate FAK and ERK1/ERK2 signaling cascades.                                                                                                     |
| N | Q6UVK1 | CC | May also inhibit neurite outgrowth and growth cone collapse during axon regeneration                                                                   |
| N | Q6UVK1 | CC | May modulate the plasminogen system by enhancing plasminogen activation and inhibiting angiostatin                                                     |
| N | Q6UVK1 | CC | May promote retraction fiber formation and cell polarization through Rho GTPase activation                                                             |
| N | Q6UVK1 | CC | May regulate MMP16-dependent degradation and invasion of type I collagen participating in melanoma cells invasion properties                           |
| N | Q6UVK1 | CC | May stimulate alpha-4, beta-1 integrin- mediated adhesion and spreading by recruiting and activating a signaling cascade through CDC42, ACK1 and BCAR1 |
| N | Q6UVK1 | DE | Chondroitin sulfate proteoglycan 4;                                                                                                                    |
| N | Q6UVK1 | DE | Chondroitin sulfate proteoglycan NG2;                                                                                                                  |
| N | Q6UVK1 | DE | Melanoma chondroitin sulfate proteoglycan;                                                                                                             |
| N | Q6UVK1 | DE | Melanoma-associated chondroitin sulfate proteoglycan;                                                                                                  |
| N | Q6UVK1 | DR | cell differentiation                                                                                                                                   |
| N | Q6UVK1 | DR | intracellular signal transduction                                                                                                                      |
| N | Q6UVK1 | DR | positive regulation of peptidyl-tyrosine phosphorylation                                                                                               |
| N | Q6UVK1 | DR | protein kinase binding                                                                                                                                 |
| N | Q6UVK1 | DR | signal transducer activity                                                                                                                             |
| N | Q6UVK1 | DR | tissue remodeling                                                                                                                                      |
| N | Q6UXK2 | CC | Required for axon extension during neural development (By similarity).                                                                                 |
| N | Q6UXK2 | DE | Immunoglobulin superfamily containing leucine-rich repeat protein 2;                                                                                   |
| N | Q6UXK2 | DE | Leucine-rich repeat domain and immunoglobulin domain-containing axon extension protein;                                                                |
| N | Q6UXK2 | DR | positive regulation of axon extension                                                                                                                  |
| N | Q6W8Q2 | CC | Antioxidant protein that seems to contribute to the inhibition of germination during stress (By similarity).                                           |
| N | Q6W8Q2 | DE | 1-Cys peroxiredoxin PER1;                                                                                                                              |
| N | Q6W8Q2 | DE | Rehydrin homolog;                                                                                                                                      |
| N | Q6W8Q2 | DE | Thioredoxin peroxidase;                                                                                                                                |
| N | Q6W8Q2 | DR | cell redox homeostasis                                                                                                                                 |
| N | Q6W8Q2 | DR | oxidation-reduction process                                                                                                                            |
| N | Q6W8Q2 | DR | peroxidase activity                                                                                                                                    |
| N | Q6W8Q2 | DR | peroxiredoxin activity                                                                                                                                 |
| N | Q6X7S9 | CC | Interacts with EP300 and acts as a repressor of MYOD- dependent transcription and muscle differentiation                                               |
| N | Q6X7S9 | CC | Acts as a repressor of TGFB/SMAD transcriptional responses                                                                                             |
| N | Q6X7S9 | CC | Inhibits EP300 histone acetyltransferase activity                                                                                                      |
| N | Q6X7S9 | CC | May act as a repressor of the TGFB/SMAD3-dependent signaling by selectively blocking formation of TGFB-induced SMAD3-SMAD4 complex (By similarity).    |
| N | Q6X7S9 | DE | CREBBP/EP300 inhibitor 2;                                                                                                                              |
| N | Q6X7S9 | DE | EID-1-like inhibitor of differentiation 2;                                                                                                             |
| N | Q6X7S9 | DE | EP300-interacting inhibitor of differentiation 2;                                                                                                      |
| N | Q6X7S9 | DR | SMAD protein complex assembly                                                                                                                          |
| N | Q6X7S9 | DR | cell differentiation                                                                                                                                   |

|   |        |    |                                                                                                                                                                                                                                                                                                 |
|---|--------|----|-------------------------------------------------------------------------------------------------------------------------------------------------------------------------------------------------------------------------------------------------------------------------------------------------|
| N | Q6X7S9 | DR | muscle organ development                                                                                                                                                                                                                                                                        |
| N | Q6X7S9 | DR | negative regulation of transforming growth factor beta receptor signaling pathway                                                                                                                                                                                                               |
| N | Q6X7S9 | DR | regulation of cell proliferation                                                                                                                                                                                                                                                                |
| N | Q6X7S9 | DR | transforming growth factor beta receptor complex assembly                                                                                                                                                                                                                                       |
| N | Q6XTD8 | CC | Inhibits post-transcriptional processing of cellular pre-mRNA, by binding and inhibiting two cellular proteins that are required for the 3'-end processing of cellular pre-mRNAs: the 30 kDa cleavage and polyadenylation specificity factor (CPSF4) and the poly(A)-binding protein 2 (PABPN1) |
| N | Q6XTD8 | CC | Cellular protein synthesis is thereby shut off very early after virus infection                                                                                                                                                                                                                 |
| N | Q6XTD8 | CC | This results in the accumulation of unprocessed 3' end pre-mRNAs which can't be exported from the nucleus                                                                                                                                                                                       |
| N | Q6XTD8 | CC | Viral protein synthesis is not affected by the inhibition of the cellular 3' end processing machinery because the poly(A) tails of viral mRNAs are produced by the viral polymerase through a stuttering mechanism (By similarity).                                                             |
| N | Q6XTD8 | DE | Non-structural protein 1;                                                                                                                                                                                                                                                                       |
| N | Q6XTD8 | DR | evasion by virus of host immune response                                                                                                                                                                                                                                                        |
| N | Q6XTK0 | CC | Inhibits post-transcriptional processing of cellular pre-mRNA, by binding and inhibiting two cellular proteins that are required for the 3'-end processing of cellular pre-mRNAs: the 30 kDa cleavage and polyadenylation specificity factor (CPSF4) and the poly(A)-binding protein 2 (PABPN1) |
| N | Q6XTK0 | CC | Cellular protein synthesis is thereby shut off very early after virus infection                                                                                                                                                                                                                 |
| N | Q6XTK0 | CC | This results in the accumulation of unprocessed 3' end pre-mRNAs which can't be exported from the nucleus                                                                                                                                                                                       |
| N | Q6XTK0 | CC | Viral protein synthesis is not affected by the inhibition of the cellular 3' end processing machinery because the poly(A) tails of viral mRNAs are produced by the viral polymerase through a stuttering mechanism (By similarity).                                                             |
| N | Q6XTK0 | DE | Non-structural protein 1;                                                                                                                                                                                                                                                                       |
| N | Q6XTK0 | DR | evasion by virus of host immune response                                                                                                                                                                                                                                                        |
| N | Q6YK37 | CC | Catalyzes the depolymerization of methylglucuronoxylan (MeGAXn)                                                                                                                                                                                                                                 |
| N | Q6YK37 | CC | It cleaves the beta-1,4-xylosidic bond penultimate to that linking carbon one of the xylose residue substituted with alpha-1,2-linked 4-O-methyl-D-glucuronate (MeGA) (By similarity).                                                                                                          |
| N | Q6YK37 | DE | Endoxylanase xynC;                                                                                                                                                                                                                                                                              |
| N | Q6YK37 | DE | Glucuronoxylan xylanohydrolase;                                                                                                                                                                                                                                                                 |
| N | Q6YK37 | DE | Glucuronoxylanase xynC;                                                                                                                                                                                                                                                                         |
| N | Q6YK37 | DR | cation binding                                                                                                                                                                                                                                                                                  |
| N | Q6YK37 | DR | glucosylceramidase activity                                                                                                                                                                                                                                                                     |
| N | Q6YK37 | DR | glucuronoarabinoxylan endo-1,4-beta-xylanase activity                                                                                                                                                                                                                                           |
| N | Q6YK37 | DR | lysosome organization                                                                                                                                                                                                                                                                           |
| N | Q6YK37 | DR | sphingolipid metabolic process                                                                                                                                                                                                                                                                  |
| N | Q6YK37 | DR | xylan catabolic process                                                                                                                                                                                                                                                                         |
| N | Q6YPX7 | DE | Phenylalanine--tRNA ligase beta chain;                                                                                                                                                                                                                                                          |
| N | Q6YPX7 | DE | Phenylalanyl-tRNA synthetase beta chain;                                                                                                                                                                                                                                                        |
| N | Q6YPX7 | DR | magnesium ion binding                                                                                                                                                                                                                                                                           |
| N | Q6YPX7 | DR | phenylalanine-tRNA ligase activity                                                                                                                                                                                                                                                              |
| N | Q6YPX7 | DR | phenylalanyl-tRNA aminoacylation                                                                                                                                                                                                                                                                |
| N | Q6YPX7 | DR | tRNA processing                                                                                                                                                                                                                                                                                 |
| N | Q6YXP2 | CC | Seems to be required for the assembly of the photosystem I complex (By similarity)                                                                                                                                                                                                              |
| N | Q6YXP2 | DE | Photosystem I assembly protein ycf3;                                                                                                                                                                                                                                                            |
| N | Q6YXP2 | DR | photosynthesis                                                                                                                                                                                                                                                                                  |
| N | Q6Z3L4 | CC | Transcription factor which may be involved in developmental processes (By similarity)                                                                                                                                                                                                           |
| N | Q6Z3L4 | DE | Protein WOX11/12;                                                                                                                                                                                                                                                                               |
| N | Q6Z3L4 | DE | WUSCHEL-related homeobox 10;                                                                                                                                                                                                                                                                    |
| N | Q6Z3L4 | DR | multicellular organismal development                                                                                                                                                                                                                                                            |
| N | Q6Z3L4 | DR | regulation of transcription, DNA-dependent                                                                                                                                                                                                                                                      |
| N | Q6Z3L4 | DR | sequence-specific DNA binding                                                                                                                                                                                                                                                                   |
| N | Q6Z3L4 | DR | sequence-specific DNA binding transcription factor activity                                                                                                                                                                                                                                     |
| N | Q6ZMM2 | DE | ADAMTS-like protein 5;                                                                                                                                                                                                                                                                          |
| N | Q6ZMM2 | DE | Thrombospondin type-1 domain-containing protein 6;                                                                                                                                                                                                                                              |
| N | Q6ZMM2 | DR | metalloendopeptidase activity                                                                                                                                                                                                                                                                   |
| N | Q6ZMM2 | DR | zinc ion binding                                                                                                                                                                                                                                                                                |
| N | Q6ZVW7 | DE | IL-17 receptor E-like;                                                                                                                                                                                                                                                                          |
| N | Q6ZVW7 | DE | IL-17RE-like;                                                                                                                                                                                                                                                                                   |
| N | Q6ZVW7 | DE | Putative interleukin-17 receptor E-like;                                                                                                                                                                                                                                                        |
| N | Q6ZW76 | DE | Ankyrin repeat and SAM domain-containing protein 3;                                                                                                                                                                                                                                             |

|   |        |    |                                                                                                                                                                                                                               |
|---|--------|----|-------------------------------------------------------------------------------------------------------------------------------------------------------------------------------------------------------------------------------|
| N | Q71DC3 | DE | Neuropeptide-like 3;                                                                                                                                                                                                          |
| N | Q71DC3 | DE | SHA-peptide;                                                                                                                                                                                                                  |
| N | Q71DC3 | DE | VVI-amide peptide;                                                                                                                                                                                                            |
| N | Q71DC3 | DR | neuropeptide signaling pathway                                                                                                                                                                                                |
| N | Q71RU5 | CC | Core subunit of the mitochondrial membrane respiratory chain NADH dehydrogenase (Complex I) that is believed to belong to the minimal assembly                                                                                |
| N | Q71RU5 | CC | Complex I functions in the transfer of electrons from NADH to the respiratory chain                                                                                                                                           |
| N | Q71RU5 | CC | The immediate electron acceptor for the enzyme is believed to be ubiquinone (By similarity).                                                                                                                                  |
| N | Q71RU5 | DE | NADH dehydrogenase subunit 4L;                                                                                                                                                                                                |
| N | Q71RU5 | DE | NADH-ubiquinone oxidoreductase chain 4L;                                                                                                                                                                                      |
| N | Q71RU5 | DR | ATP synthesis coupled electron transport                                                                                                                                                                                      |
| N | Q71RU5 | DR | NADH dehydrogenase (ubiquinone) activity                                                                                                                                                                                      |
| N | Q71WG1 | CC | This protein binds to the 23S rRNA, and is important in its secondary structure                                                                                                                                               |
| N | Q71WG1 | CC | It is located near the subunit interface in the base of the L7/L12 stalk, and near the tRNA binding site of the peptidyltransferase center (By similarity).                                                                   |
| N | Q71WG1 | DE | 50S ribosomal protein L6;                                                                                                                                                                                                     |
| N | Q71WG1 | DR | structural constituent of ribosome                                                                                                                                                                                            |
| N | Q71XV0 | CC | Channel that opens in response to stretch forces in the membrane lipid bilayer                                                                                                                                                |
| N | Q71XV0 | CC | May participate in the regulation of osmotic pressure changes within the cell (By similarity).                                                                                                                                |
| N | Q71XV0 | DE | Large-conductance mechanosensitive channel;                                                                                                                                                                                   |
| N | Q71XV0 | DR | ion channel activity                                                                                                                                                                                                          |
| N | Q71Y27 | CC | Catalyzes a reversible aldol reaction between acetaldehyde and D-glyceraldehyde 3-phosphate to generate 2-deoxy- D-ribose 5-phosphate (By similarity)                                                                         |
| N | Q71Y27 | DE | 2-deoxy-D-ribose 5-phosphate aldolase;                                                                                                                                                                                        |
| N | Q71Y27 | DE | Deoxyriboaldolase;                                                                                                                                                                                                            |
| N | Q71Y27 | DE | Deoxyribose-phosphate aldolase;                                                                                                                                                                                               |
| N | Q71Y27 | DE | Phosphodeoxyriboaldolase;                                                                                                                                                                                                     |
| N | Q71Y27 | DR | deoxyribonucleotide catabolic process                                                                                                                                                                                         |
| N | Q71Y27 | DR | deoxyribose-phosphate aldolase activity                                                                                                                                                                                       |
| N | Q71Z52 | CC | Catalyzes the formation of N(7)-methylguanine at position 46 (m7G46) in tRNA (By similarity).                                                                                                                                 |
| N | Q71Z52 | DE | tRNA (guanine-N(7)-)-methyltransferase;                                                                                                                                                                                       |
| N | Q71Z52 | DE | tRNA(m7G46)-methyltransferase;                                                                                                                                                                                                |
| N | Q71Z52 | DR | tRNA (guanine-N7-)-methyltransferase activity                                                                                                                                                                                 |
| N | Q71ZH3 | DE | Cytidine monophosphokinase;                                                                                                                                                                                                   |
| N | Q71ZH3 | DE | Uridine kinase;                                                                                                                                                                                                               |
| N | Q71ZH3 | DE | Uridine monophosphokinase;                                                                                                                                                                                                    |
| N | Q71ZH3 | DR | phosphotransferase activity, alcohol group as acceptor                                                                                                                                                                        |
| N | Q71ZH3 | DR | uridine kinase activity                                                                                                                                                                                                       |
| N | Q721J0 | DE | Phosphoriboisomerase A;                                                                                                                                                                                                       |
| N | Q721J0 | DE | Ribose-5-phosphate isomerase A;                                                                                                                                                                                               |
| N | Q721J0 | DR | pentose-phosphate shunt, non-oxidative branch                                                                                                                                                                                 |
| N | Q721J0 | DR | ribose-5-phosphate isomerase activity                                                                                                                                                                                         |
| N | Q728U8 | CC | Cell wall formation                                                                                                                                                                                                           |
| N | Q728U8 | CC | Catalyzes the transfer of a GlcNAc subunit on undecaprenyl-pyrophosphoryl-MurNAc-pentapeptide (lipid intermediate I) to form undecaprenyl-pyrophosphoryl-MurNAc- (pentapeptide)GlcNAc (lipid intermediate II) (By similarity) |
| N | Q728U8 | DE | UDP-N-acetylglucosamine--N-acetylmuramyl-(pentapeptide) pyrophosphoryl-undecaprenol N-acetylglucosamine transferase;                                                                                                          |
| N | Q728U8 | DE | Undecaprenyl-PP-MurNAc-pentapeptide-UDPGlcNAc GlcNAc transferase;                                                                                                                                                             |
| N | Q728U8 | DR | UDP-N-acetyl-D-glucosamine:N-acetylmuramoyl-L-alanyl-D-glutamyl-meso-2,6-diaminopimelyl-D-alanyl-D-alanine-diphosphoundecaprenol 4-beta-N-acetylglucosaminyltransferase activity                                              |
| N | Q728U8 | DR | UDP-N-acetylgalactosamine biosynthetic process                                                                                                                                                                                |
| N | Q728U8 | DR | carbohydrate binding                                                                                                                                                                                                          |
| N | Q728U8 | DR | cell division                                                                                                                                                                                                                 |
| N | Q728U8 | DR | cellular cell wall organization                                                                                                                                                                                               |
| N | Q728U8 | DR | lipid glycosylation                                                                                                                                                                                                           |
| N | Q728U8 | DR | peptidoglycan biosynthetic process                                                                                                                                                                                            |
| N | Q728U8 | DR | regulation of cell shape                                                                                                                                                                                                      |
| N | Q728U8 | DR | undecaprenyldiphospho-muramoylpentapeptide beta-N-acetylglucosaminyltransferase activity                                                                                                                                      |



|   |        |    |                                                                                                                                                                                                           |
|---|--------|----|-----------------------------------------------------------------------------------------------------------------------------------------------------------------------------------------------------------|
| N | Q72BL2 | CC | Catalyzes the ATP-dependent amination of UTP to CTP with either L-glutamine or ammonia as the source of nitrogen (By similarity).                                                                         |
| N | Q72BL2 | DE | CTP synthase;                                                                                                                                                                                             |
| N | Q72BL2 | DE | CTP synthetase;                                                                                                                                                                                           |
| N | Q72BL2 | DE | UTP--ammonia ligase;                                                                                                                                                                                      |
| N | Q72BL2 | DR | CTP synthase activity                                                                                                                                                                                     |
| N | Q72BL2 | DR | glutamine metabolic process                                                                                                                                                                               |
| N | Q72BL2 | DR | pyrimidine nucleotide biosynthetic process                                                                                                                                                                |
| N | Q72C17 | CC | ATPase subunit of a proteasome-like degradation complex; this subunit has chaperone activity                                                                                                              |
| N | Q72C17 | CC | HslU recognizes the N-terminal part of its protein substrates and unfolds these before they are guided to HslV for hydrolysis (By similarity).                                                            |
| N | Q72C17 | CC | The binding of ATP and its subsequent hydrolysis by HslU are essential for unfolding of protein substrates subsequently hydrolyzed by HslV                                                                |
| N | Q72C17 | DE | ATP-dependent protease ATPase subunit HslU;                                                                                                                                                               |
| N | Q72C17 | DE | Unfoldase HslU;                                                                                                                                                                                           |
| N | Q72C17 | DR | ATPase activity                                                                                                                                                                                           |
| N | Q72C17 | DR | peptidase activity, acting on L-amino acid peptides                                                                                                                                                       |
| N | Q72CF5 | CC | One of the primary rRNA binding proteins, it binds directly to 16S rRNA where it nucleates assembly of the body of the 30S subunit (By similarity).                                                       |
| N | Q72CF5 | DE | 30S ribosomal protein S4;                                                                                                                                                                                 |
| N | Q72CF5 | DR | structural constituent of ribosome                                                                                                                                                                        |
| N | Q72CG2 | DE | 50S ribosomal protein L30;                                                                                                                                                                                |
| N | Q72CG2 | DR | structural constituent of ribosome                                                                                                                                                                        |
| N | Q72I05 | CC | One of the primary rRNA binding proteins, this protein initially binds near the 5'-end of the 23S rRNA                                                                                                    |
| N | Q72I05 | CC | It is important during the early stages of 50S assembly                                                                                                                                                   |
| N | Q72I05 | CC | It makes multiple contacts with different domains of the 23S rRNA in the assembled 50S subunit and ribosome (By similarity).                                                                              |
| N | Q72I05 | DE | 50S ribosomal protein L4;                                                                                                                                                                                 |
| N | Q72I05 | DR | structural constituent of ribosome                                                                                                                                                                        |
| N | Q72JR1 | CC | Catalyzes the interconversion of methylthioribose-1- phosphate (MTR-1-P) into methylthioribulose-1-phosphate (MTRu-1-P) (By similarity).                                                                  |
| N | Q72JR1 | DE | MTR-1-P isomerase;                                                                                                                                                                                        |
| N | Q72JR1 | DE | Methylthioribose-1-phosphate isomerase;                                                                                                                                                                   |
| N | Q72JR1 | DE | S-methyl-5-thioribose-1-phosphate isomerase;                                                                                                                                                              |
| N | Q72JR1 | DR | S-methyl-5-thioribose-1-phosphate isomerase activity                                                                                                                                                      |
| N | Q72JR1 | DR | methionine biosynthetic process                                                                                                                                                                           |
| N | Q72NP0 | CC | Catalyzes the phosphorylation of pantothenate (Pan), the first step in CoA biosynthesis (By similarity).                                                                                                  |
| N | Q72NP0 | DE | Pantothenic acid kinase;                                                                                                                                                                                  |
| N | Q72NP0 | DE | Type III pantothenate kinase;                                                                                                                                                                             |
| N | Q72NP0 | DR | coenzyme A biosynthetic process                                                                                                                                                                           |
| N | Q72NP0 | DR | metal ion binding                                                                                                                                                                                         |
| N | Q72NP0 | DR | pantothenate kinase activity                                                                                                                                                                              |
| N | Q72NP0 | DR | transcription activator activity                                                                                                                                                                          |
| N | Q72PR5 | DE | FGAM synthase II;                                                                                                                                                                                         |
| N | Q72PR5 | DE | Phosphoribosylformylglycinamide synthase 2;                                                                                                                                                               |
| N | Q72PR5 | DE | Phosphoribosylformylglycinamide synthase II;                                                                                                                                                              |
| N | Q72PR5 | DR | 'de novo' IMP biosynthetic process                                                                                                                                                                        |
| N | Q72PR5 | DR | phosphoribosylformylglycinamide synthase activity                                                                                                                                                         |
| N | Q72R81 | CC | Catalyzes the addition of meso-diaminopimelic acid to the nucleotide precursor UDP-N-acetylmuramoyl-L-alanyl-D-glutamate (UMAG) in the biosynthesis of bacterial cell-wall peptidoglycan (By similarity). |
| N | Q72R81 | DE | Meso-A2pm-adding enzyme;                                                                                                                                                                                  |
| N | Q72R81 | DE | Meso-diaminopimelate-adding enzyme;                                                                                                                                                                       |
| N | Q72R81 | DE | UDP-MurNAc-L-Ala-D-Glu:meso-diaminopimelate ligase;                                                                                                                                                       |
| N | Q72R81 | DE | UDP-MurNAc-tripeptide synthetase;                                                                                                                                                                         |
| N | Q72R81 | DE | UDP-N-acetylmuramoyl-L-alanyl-D-glutamate--2,6-diaminopimelate ligase;                                                                                                                                    |
| N | Q72R81 | DE | UDP-N-acetylmuramyl-tripeptide synthetase;                                                                                                                                                                |
| N | Q72R81 | DR | UDP-N-acetylmuramoylalanyl-D-glutamate-2,6-diaminopimelate ligase activity                                                                                                                                |
| N | Q72R81 | DR | cell division                                                                                                                                                                                             |
| N | Q72R81 | DR | cellular cell wall organization                                                                                                                                                                           |
| N | Q72R81 | DR | peptidoglycan biosynthetic process                                                                                                                                                                        |
| N | Q72R81 | DR | regulation of cell shape                                                                                                                                                                                  |

|   |        |    |                                                                                                                                                                      |
|---|--------|----|----------------------------------------------------------------------------------------------------------------------------------------------------------------------|
| N | Q72RH7 | CC | Catalyzes the oxidation of 3-carboxy-2-hydroxy-4- methylpentanoate (3-isopropylmalate) to 3-carboxy-4-methyl-2- oxopentanoate                                        |
| N | Q72RH7 | CC | The product decarboxylates to 4-methyl-2 oxopentanoate.                                                                                                              |
| N | Q72RH7 | DE | 3-isopropylmalate dehydrogenase;                                                                                                                                     |
| N | Q72RH7 | DE | Beta-IPM dehydrogenase;                                                                                                                                              |
| N | Q72RH7 | DR | 3-isopropylmalate dehydrogenase activity                                                                                                                             |
| N | Q72RH7 | DR | leucine biosynthetic process                                                                                                                                         |
| N | Q72RH7 | DR | magnesium ion binding                                                                                                                                                |
| N | Q72RH7 | DR | oxidation-reduction process                                                                                                                                          |
| N | Q72ZC1 | DE | UPF0173 metal-dependent hydrolase BCE_4747;                                                                                                                          |
| N | Q72ZC1 | DR | hydrolase activity                                                                                                                                                   |
| N | Q730M0 | CC | Participates actively in the response to hyperosmotic and heat shock by preventing the aggregation of stress-denatured proteins, in association with dnaK and grpE   |
| N | Q730M0 | CC | GrpE releases ADP from dnaK; ATP binding to dnaK triggers the release of the substrate protein, thus completing the reaction cycle                                   |
| N | Q730M0 | CC | It is the nucleotide exchange factor for dnaK and may function as a thermosensor                                                                                     |
| N | Q730M0 | CC | Several rounds of ATP- dependent interactions between dnaJ, dnaK and grpE are required for fully efficient folding (By similarity).                                  |
| N | Q730M0 | CC | Unfolded proteins bind mutually to dnaJ; upon interaction with the dnaJ-bound protein, dnaK hydrolyzes its bound ATP, resulting in the formation of a stable complex |
| N | Q730M0 | DE | HSP-70 cofactor;                                                                                                                                                     |
| N | Q730M0 | DE | Protein grpE;                                                                                                                                                        |
| N | Q730M0 | DR | adenyl-nucleotide exchange factor activity                                                                                                                           |
| N | Q730M0 | DR | chaperone binding                                                                                                                                                    |
| N | Q730M0 | DR | protein folding                                                                                                                                                      |
| N | Q730M0 | DR | protein homodimerization activity                                                                                                                                    |
| N | Q730M0 | DR | response to stress                                                                                                                                                   |
| N | Q734S7 | DE | Putative regulator of ribonuclease activity;                                                                                                                         |
| N | Q734S7 | DR | regulation of RNA metabolic process                                                                                                                                  |
| N | Q734S7 | DR | ribonuclease inhibitor activity                                                                                                                                      |
| N | Q73AY2 | CC | Methyltransferase required for the conversion of dimethylmenaquinone (DMKH2) to menaquinone (MKH2) (By similarity).                                                  |
| N | Q73AY2 | DE | Menaquinone biosynthesis methyltransferase ubiE;                                                                                                                     |
| N | Q73AY2 | DR | menaquinone biosynthetic process                                                                                                                                     |
| N | Q73AY2 | DR | methyltransferase activity                                                                                                                                           |
| N | Q73FJ4 | CC | Involved in the hydrolysis of glutamine to glutamate and ammonia                                                                                                     |
| N | Q73FJ4 | CC | Channels an ammonia molecule to pdxS (By similarity).                                                                                                                |
| N | Q73FJ4 | DE | Glutamine amidotransferase glutaminase subunit pdxT;                                                                                                                 |
| N | Q73FJ4 | DE | Glutamine amidotransferase subunit pdxT;                                                                                                                             |
| N | Q73FJ4 | DR | glutamine metabolic process                                                                                                                                          |
| N | Q73FJ4 | DR | transferase activity                                                                                                                                                 |
| N | Q73HS5 | CC | Catalyzes the ATP-dependent amination of UTP to CTP with either L-glutamine or ammonia as the source of nitrogen (By similarity).                                    |
| N | Q73HS5 | DE | CTP synthase;                                                                                                                                                        |
| N | Q73HS5 | DE | CTP synthetase;                                                                                                                                                      |
| N | Q73HS5 | DE | UTP--ammonia ligase;                                                                                                                                                 |
| N | Q73HS5 | DR | CTP synthase activity                                                                                                                                                |
| N | Q73HS5 | DR | glutamine metabolic process                                                                                                                                          |
| N | Q73HS5 | DR | pyrimidine nucleotide biosynthetic process                                                                                                                           |
| N | Q73J84 | CC | Catalyzes the ATP-dependent amination of UTP to CTP with either L-glutamine or ammonia as the source of nitrogen (By similarity).                                    |
| N | Q73J84 | DE | CTP synthase;                                                                                                                                                        |
| N | Q73J84 | DE | CTP synthetase;                                                                                                                                                      |
| N | Q73J84 | DE | UTP--ammonia ligase;                                                                                                                                                 |
| N | Q73J84 | DR | CTP synthase activity                                                                                                                                                |
| N | Q73J84 | DR | glutamine metabolic process                                                                                                                                          |
| N | Q73J84 | DR | pyrimidine nucleotide biosynthetic process                                                                                                                           |
| N | Q73JG0 | CC | This protein specifically catalyzes the removal of signal peptides from prolipoproteins (By similarity).                                                             |
| N | Q73JG0 | DE | Lipoprotein signal peptidase;                                                                                                                                        |
| N | Q73JG0 | DE | Prolipoprotein signal peptidase;                                                                                                                                     |
| N | Q73JG0 | DE | Signal peptidase II;                                                                                                                                                 |
| N | Q73JG0 | DR | aspartic-type endopeptidase activity                                                                                                                                 |
| N | Q73JJ8 | CC | DNA-dependent RNA polymerase catalyzes the transcription of DNA into RNA using the four ribonucleoside triphosphates as substrates.                                  |

|   |        |    |                                                                                                                                                                                                          |
|---|--------|----|----------------------------------------------------------------------------------------------------------------------------------------------------------------------------------------------------------|
| N | Q73JJ8 | DE | DNA-directed RNA polymerase subunit beta';                                                                                                                                                               |
| N | Q73JJ8 | DE | RNA polymerase subunit beta';                                                                                                                                                                            |
| N | Q73JJ8 | DE | RNAP subunit beta';                                                                                                                                                                                      |
| N | Q73JJ8 | DE | Transcriptase subunit beta';                                                                                                                                                                             |
| N | Q73JJ8 | DR | DNA-directed RNA polymerase activity                                                                                                                                                                     |
| N | Q73MH0 | CC | DNA ligase that catalyzes the formation of phosphodiester linkages between 5'-phosphoryl and 3'-hydroxyl groups in double-stranded DNA using NAD as a coenzyme and as the energy source for the reaction |
| N | Q73MH0 | CC | It is essential for DNA replication and repair of damaged DNA (By similarity).                                                                                                                           |
| N | Q73MH0 | DE | Polydeoxyribonucleotide synthase [NAD+];                                                                                                                                                                 |
| N | Q73MH0 | DR | DNA ligase (NAD+) activity                                                                                                                                                                               |
| N | Q73MH0 | DR | DNA replication                                                                                                                                                                                          |
| N | Q73MH0 | DR | metal ion binding                                                                                                                                                                                        |
| N | Q73SG5 | DE | UPF0336 protein MAP_4109;                                                                                                                                                                                |
| N | Q73SG5 | DR | oxidoreductase activity                                                                                                                                                                                  |
| N | Q73UI3 | CC | EXHIBITS S-adenosyl-L-methionine-dependent methyltransferase activity (By similarity)                                                                                                                    |
| N | Q73UI3 | DE | Putative S-adenosyl-L-methionine-dependent methyltransferase MAP_3385;                                                                                                                                   |
| N | Q73UI3 | DR | methyltransferase activity                                                                                                                                                                               |
| N | Q73XR5 | CC | Catalyzes the reversible adenylation of nicotinate mononucleotide (NaMN) to nicotinic acid adenine dinucleotide (NaAD) (By similarity).                                                                  |
| N | Q73XR5 | DE | Deamido-NAD(+) diphosphorylase;                                                                                                                                                                          |
| N | Q73XR5 | DE | Deamido-NAD(+) pyrophosphorylase;                                                                                                                                                                        |
| N | Q73XR5 | DE | NaMN adenylyltransferase;                                                                                                                                                                                |
| N | Q73XR5 | DE | Nicotinate mononucleotide adenylyltransferase;                                                                                                                                                           |
| N | Q73XR5 | DE | Probable nicotinate-nucleotide adenylyltransferase;                                                                                                                                                      |
| N | Q73XR5 | DR | NAD biosynthetic process                                                                                                                                                                                 |
| N | Q73XR5 | DR | nicotinate-nucleotide adenylyltransferase activity                                                                                                                                                       |
| N | Q73ZR2 | CC | The glycine cleavage system catalyzes the degradation of glycine                                                                                                                                         |
| N | Q73ZR2 | CC | The H protein shuttles the methylamine group of glycine from the P protein to the T protein (By similarity).                                                                                             |
| N | Q73ZR2 | DE | Glycine cleavage system H protein;                                                                                                                                                                       |
| N | Q73ZR2 | DR | glycine decarboxylation via glycine cleavage system                                                                                                                                                      |
| N | Q741F1 | CC | Catalyzes the conversion of D-ribulose 5-phosphate to formate and 3,4-dihydroxy-2-butanone 4-phosphate (By similarity).                                                                                  |
| N | Q741F1 | DE | 3,4-dihydroxy-2-butanone 4-phosphate synthase;                                                                                                                                                           |
| N | Q741F1 | DE | DHBP synthase;                                                                                                                                                                                           |
| N | Q741F1 | DE | GTP cyclohydrolase II;                                                                                                                                                                                   |
| N | Q741F1 | DE | GTP cyclohydrolase-2;                                                                                                                                                                                    |
| N | Q741F1 | DE | Riboflavin biosynthesis protein ribBA;                                                                                                                                                                   |
| N | Q741F1 | DR | 3,4-dihydroxy-2-butanone-4-phosphate synthase activity                                                                                                                                                   |
| N | Q741F1 | DR | GTP cyclohydrolase II activity                                                                                                                                                                           |
| N | Q741F1 | DR | metal ion binding                                                                                                                                                                                        |
| N | Q741F1 | DR | riboflavin biosynthetic process                                                                                                                                                                          |
| N | Q748Y5 | CC | Seems to be the binding site for several of the factors involved in protein synthesis and appears to be essential for accurate translation (By similarity).                                              |
| N | Q748Y5 | DE | 50S ribosomal protein L7/L12;                                                                                                                                                                            |
| N | Q748Y5 | DR | structural constituent of ribosome                                                                                                                                                                       |
| N | Q74JJ0 | DE | UPF0324 membrane protein LJ_1117;                                                                                                                                                                        |
| N | Q74MR6 | CC | This protein binds to the 23S rRNA, and is important in its secondary structure                                                                                                                          |
| N | Q74MR6 | CC | It is located near the subunit interface in the base of the L7/L12 stalk, and near the tRNA binding site of the peptidyltransferase center (By similarity).                                              |
| N | Q74MR6 | DE | 50S ribosomal protein L6P;                                                                                                                                                                               |
| N | Q74MR6 | DR | structural constituent of ribosome                                                                                                                                                                       |
| N | Q751Z4 | CC | May be involved in decane metabolism and autophagy                                                                                                                                                       |
| N | Q751Z4 | CC | Involved in the biosynthesis of sterol glucoside (By similarity).                                                                                                                                        |
| N | Q751Z4 | DE | Autophagy-related protein 26;                                                                                                                                                                            |
| N | Q751Z4 | DE | Sterol 3-beta-glucosyltransferase;                                                                                                                                                                       |
| N | Q751Z4 | DR | lipid glycosylation                                                                                                                                                                                      |
| N | Q751Z4 | DR | protein transport                                                                                                                                                                                        |
| N | Q751Z4 | DR | sterol 3-beta-glucosyltransferase activity                                                                                                                                                               |
| N | Q751Z4 | DR | sterol biosynthetic process                                                                                                                                                                              |
| N | Q753I0 | CC | The GINS complex plays an essential role in the initiation of DNA replication                                                                                                                            |
| N | Q753I0 | CC | Has a role in chromosome segregation (By similarity).                                                                                                                                                    |
| N | Q753I0 | DE | DNA replication complex GINS protein SLD5;                                                                                                                                                               |
| N | Q753I0 | DR | DNA replication                                                                                                                                                                                          |

|   |        |    |                                                                                                                                                                                                                                           |
|---|--------|----|-------------------------------------------------------------------------------------------------------------------------------------------------------------------------------------------------------------------------------------------|
| N | Q753I0 | DR | chromosome segregation                                                                                                                                                                                                                    |
| N | Q755C8 | CC | Formation of pseudouridine at positions 27 and 28 in the anticodon stem and loop of transfer RNAs; at positions 34 and 36 of intron-containing precursor tRNA(Ile) and at position 35 in the intron-containing tRNA(Tyr) (By similarity). |
| N | Q755C8 | DE | tRNA pseudouridine synthase 1;                                                                                                                                                                                                            |
| N | Q755C8 | DE | tRNA pseudouridylylase synthase 1;                                                                                                                                                                                                        |
| N | Q755C8 | DE | tRNA-uridine isomerase 1;                                                                                                                                                                                                                 |
| N | Q755C8 | DR | metal ion binding                                                                                                                                                                                                                         |
| N | Q755C8 | DR | pseudouridine synthase activity                                                                                                                                                                                                           |
| N | Q755C8 | DR | pseudouridine synthesis                                                                                                                                                                                                                   |
| N | Q755C8 | DR | tRNA processing                                                                                                                                                                                                                           |
| N | Q755G5 | CC | DNA helicase which participates in several chromatin remodeling complexes, including the SWR1 and the INO80 complexes                                                                                                                     |
| N | Q755G5 | CC | Also involved in pre-rRNA processing (By similarity).                                                                                                                                                                                     |
| N | Q755G5 | CC | The INO80 complex remodels chromatin by shifting nucleosomes and is involved in DNA repair                                                                                                                                                |
| N | Q755G5 | CC | The SWR1 complex mediates the ATP-dependent exchange of histone H2A for the H2A variant HZT1 leading to transcriptional regulation of selected genes by chromatin remodeling                                                              |
| N | Q755G5 | DE | RuvB-like helicase 2;                                                                                                                                                                                                                     |
| N | Q755G5 | DR | DNA helicase activity                                                                                                                                                                                                                     |
| N | Q755G5 | DR | chromatin modification                                                                                                                                                                                                                    |
| N | Q755G5 | DR | rRNA processing                                                                                                                                                                                                                           |
| N | Q756C4 | DE | Protein EFR3;                                                                                                                                                                                                                             |
| N | Q75AX7 | CC | Component of the SRB8-11 complex                                                                                                                                                                                                          |
| N | Q75AX7 | CC | It may inhibit the association of the Mediator complex with RNA polymerase II to form the holoenzyme complex                                                                                                                              |
| N | Q75AX7 | CC | The SRB8-11 complex is a regulatory module of the mediator complex which is itself involved in regulation of basal and activated RNA polymerase II-dependent transcription                                                                |
| N | Q75AX7 | CC | The SRB8-11 complex may be involved in the transcriptional repression of a subset of genes regulated by Mediator                                                                                                                          |
| N | Q75AX7 | CC | The SRB8-11 complex phosphorylates the C-terminal domain (CTD) of the largest subunit of RNA polymerase II (By similarity).                                                                                                               |
| N | Q75AX7 | DE | RNA polymerase II holoenzyme cyclin-like subunit;                                                                                                                                                                                         |
| N | Q75BH9 | CC | GDP-GTP exchange factor component of the mitotic exit network (MEN)                                                                                                                                                                       |
| N | Q75BH9 | CC | Fine-tunes the timing of the mitotic exit and couples this event with cytokinesis                                                                                                                                                         |
| N | Q75BH9 | CC | may also be involved in proprotein-processing in the secretory pathway (By similarity)                                                                                                                                                    |
| N | Q75BH9 | DE | Guanine nucleotide exchange factor LTE1;                                                                                                                                                                                                  |
| N | Q75BH9 | DR | cell division                                                                                                                                                                                                                             |
| N | Q75BH9 | DR | guanyl-nucleotide exchange factor activity                                                                                                                                                                                                |
| N | Q75BH9 | DR | regulation of small GTPase mediated signal transduction                                                                                                                                                                                   |
| N | Q75BH9 | DR | small GTPase mediated signal transduction                                                                                                                                                                                                 |
| N | Q75DY0 | CC | Tetrapolymerization of the monopyrrole PBG into the hydroxymethylbilane pre-uroporphyrinogen in several discrete steps (By similarity).                                                                                                   |
| N | Q75DY0 | DE | Hydroxymethylbilane synthase;                                                                                                                                                                                                             |
| N | Q75DY0 | DE | Porphobilinogen deaminase;                                                                                                                                                                                                                |
| N | Q75DY0 | DE | Pre-uroporphyrinogen synthase;                                                                                                                                                                                                            |
| N | Q75DY0 | DR | heme biosynthetic process                                                                                                                                                                                                                 |
| N | Q75DY0 | DR | hydroxymethylbilane synthase activity                                                                                                                                                                                                     |
| N | Q75DY0 | DR | peptidyl-pyrromethane cofactor linkage                                                                                                                                                                                                    |
| N | Q75FW3 | DE | 3-dehydroquinate synthase;                                                                                                                                                                                                                |
| N | Q75FW3 | DR | 3-dehydroquinate synthase activity                                                                                                                                                                                                        |
| N | Q75FW3 | DR | aromatic amino acid family biosynthetic process                                                                                                                                                                                           |
| N | Q75ZQ2 | CC | Required for maturation of urease via the functional incorporation of the urease nickel metallocenter (By similarity).                                                                                                                    |
| N | Q75ZQ2 | DE | Urease accessory protein ureD;                                                                                                                                                                                                            |
| N | Q75ZQ2 | DR | nickel ion binding                                                                                                                                                                                                                        |
| N | Q75ZQ2 | DR | nitrogen compound metabolic process                                                                                                                                                                                                       |
| N | Q788J2 | DE | Polyprotein p42;                                                                                                                                                                                                                          |
| N | Q788J2 | DE | Protein CM2;                                                                                                                                                                                                                              |
| N | Q788J2 | DE | Protein M1';                                                                                                                                                                                                                              |
| N | Q7A0D7 | CC | Toxic component of a toxin-antitoxin (TA) module                                                                                                                                                                                          |
| N | Q7A0D7 | CC | Cleavages occur preferentially in a U-rich region with a consensus sequence of 5'-[ACG]UU[ACG]-3' in single-stranded RNA (By similarity).                                                                                                 |

|   |        |    |                                                                                                                                                                                               |
|---|--------|----|-----------------------------------------------------------------------------------------------------------------------------------------------------------------------------------------------|
| N | Q7A0D7 | CC | Ribosome-independent, sequence-specific endoribonuclease that cleaves mRNA, thus inhibiting protein synthesis and inducing bacterial stasis                                                   |
| N | Q7A0D7 | DE | Endoribonuclease MazF;                                                                                                                                                                        |
| N | Q7A0D7 | DE | mRNA interferase MazF;                                                                                                                                                                        |
| N | Q7A0D7 | DR | endonuclease activity                                                                                                                                                                         |
| N | Q7A150 | CC | Involved in heme (porphyrin) scavenging                                                                                                                                                       |
| N | Q7A150 | CC | Binds Fe(2+) and Fe(3+) heme but the largest fraction is Fe(2+) heme                                                                                                                          |
| N | Q7A150 | CC | Functions as a high-affinity heme binding protein and probably has a role in relaying heme-iron from cell wall-anchored isd proteins receptors to the putative probable isdF (By similarity). |
| N | Q7A150 | DE | High-affinity heme uptake system protein isdE;                                                                                                                                                |
| N | Q7A150 | DE | Iron-regulated surface determinant protein E;                                                                                                                                                 |
| N | Q7A150 | DE | Staphylococcal iron-regulated protein F;                                                                                                                                                      |
| N | Q7A150 | DR | high-affinity iron ion transport                                                                                                                                                              |
| N | Q7A150 | DR | iron ion transmembrane transporter activity                                                                                                                                                   |
| N | Q7A150 | DR | metal ion binding                                                                                                                                                                             |
| N | Q7A3I5 | DE | D-fructose-1,6-bisphosphate 1-phosphohydrolase class 3;                                                                                                                                       |
| N | Q7A3I5 | DE | FBPase class 3;                                                                                                                                                                               |
| N | Q7A3I5 | DE | Fructose-1,6-bisphosphatase class 3;                                                                                                                                                          |
| N | Q7A3I5 | DR | fructose 1,6-bisphosphate 1-phosphatase activity                                                                                                                                              |
| N | Q7A3I5 | DR | gluconeogenesis                                                                                                                                                                               |
| N | Q7A551 | DE | Putative universal stress protein SA1532;                                                                                                                                                     |
| N | Q7A551 | DR | response to stress                                                                                                                                                                            |
| N | Q7A6M9 | DE | Organic hydroperoxide resistance protein-like;                                                                                                                                                |
| N | Q7A6M9 | DR | response to stress                                                                                                                                                                            |
| N | Q7BWI3 | CC | May be involved in signal transduction                                                                                                                                                        |
| N | Q7BWI3 | CC | Participates in the kaiABC clock protein complex, which constitutes the main circadian regulator in cyanobacteria, via its interaction with kaiC                                              |
| N | Q7BWI3 | CC | Required for robustness of the circadian rhythm of gene expression and is involved in clock outputs (By similarity).                                                                          |
| N | Q7BWI3 | DE | Adaptive-response sensory-kinase sasA;                                                                                                                                                        |
| N | Q7BWI3 | DR | peptidyl-histidine phosphorylation                                                                                                                                                            |
| N | Q7BWI3 | DR | rhythmic process                                                                                                                                                                              |
| N | Q7BWI3 | DR | two-component sensor activity                                                                                                                                                                 |
| N | Q7CQK1 | CC | Catalyzes the excretion of spermidine (By similarity).                                                                                                                                        |
| N | Q7CQK1 | DE | Spermidine export protein mdtJ;                                                                                                                                                               |
| N | Q7CR64 | DE | UPF0325 protein yaeH;                                                                                                                                                                         |
| N | Q7EZW6 | CC | Thought to be a Golgi-localized beta-glycan synthase that polymerize the backbones of noncellulosic polysaccharides (hemicelluloses) of plant cell wall.                                      |
| N | Q7EZW6 | DE | Cellulose synthase-like protein D3;                                                                                                                                                           |
| N | Q7EZW6 | DR | cellular cell wall organization                                                                                                                                                               |
| N | Q7EZW6 | DR | cellulose biosynthetic process                                                                                                                                                                |
| N | Q7EZW6 | DR | cellulose synthase (UDP-forming) activity                                                                                                                                                     |
| N | Q7FAT5 | DE | Cyclin-P2-1;                                                                                                                                                                                  |
| N | Q7FAT5 | DR | cell division                                                                                                                                                                                 |
| N | Q7G9E7 | DE | Putative F-box protein At1g52480;                                                                                                                                                             |
| N | Q7GZA1 | DE | Protein psbN;                                                                                                                                                                                 |
| N | Q7GZA1 | DR | photosynthesis                                                                                                                                                                                |
| N | Q7IS11 | CC | Usually encoded in the trnK tRNA gene intron                                                                                                                                                  |
| N | Q7IS11 | CC | probably assists in splicing its own and other chloroplast group II introns (By similarity)                                                                                                   |
| N | Q7IS11 | DE | Intron maturase;                                                                                                                                                                              |
| N | Q7IS11 | DR | mRNA processing                                                                                                                                                                               |
| N | Q7IS11 | DR | tRNA processing                                                                                                                                                                               |
| N | Q7J189 | CC | Seems to play a role in the dimerization of PSII (By similarity).                                                                                                                             |
| N | Q7J189 | DE | Photosystem II reaction center protein T;                                                                                                                                                     |
| N | Q7J189 | DR | photosynthesis                                                                                                                                                                                |
| N | Q7J1C3 | CC | Required for PSII activity (By similarity).                                                                                                                                                   |
| N | Q7J1C3 | DE | PSII 5 kDa protein;                                                                                                                                                                           |
| N | Q7J1C3 | DE | Photosystem II reaction center protein L;                                                                                                                                                     |
| N | Q7J1C3 | DR | photosynthesis                                                                                                                                                                                |
| N | Q7K2Y9 | CC | Mediates the side-chain deamidation of N-terminal glutamine residues to glutamate, an important step in N-end rule pathway of protein degradation                                             |
| N | Q7K2Y9 | CC | Conversion of the resulting N- terminal glutamine to glutamate renders the protein susceptible to arginylation, polyubiquitination and degradation as specified by the N-end rule             |

|   |        |    |                                                                                                                                                                                                                                                                              |
|---|--------|----|------------------------------------------------------------------------------------------------------------------------------------------------------------------------------------------------------------------------------------------------------------------------------|
| N | Q7K2Y9 | CC | Does not act on substrates with internal or C- terminal glutamine and does not act on non-glutamine residues in any position (By similarity).                                                                                                                                |
| N | Q7K2Y9 | DE | N-terminal Gln amidase;                                                                                                                                                                                                                                                      |
| N | Q7K2Y9 | DE | Nt(Q)-amidase;                                                                                                                                                                                                                                                               |
| N | Q7K2Y9 | DE | Protein N-terminal glutamine amidohydrolase;                                                                                                                                                                                                                                 |
| N | Q7K2Y9 | DE | Protein NH2-terminal glutamine deamidase;                                                                                                                                                                                                                                    |
| N | Q7K2Y9 | DE | Protein tungus;                                                                                                                                                                                                                                                              |
| N | Q7K2Y9 | DR | hydrolase activity, acting on carbon-nitrogen (but not peptide) bonds, in linear amides                                                                                                                                                                                      |
| N | Q7K2Y9 | DR | olfactory learning                                                                                                                                                                                                                                                           |
| N | Q7K2Y9 | DR | protein binding                                                                                                                                                                                                                                                              |
| N | Q7LZI6 | CC | This platelet antagonist specifically and reversibly binds to a site on platelet GPIb close to or identical with the site for vWF binding                                                                                                                                    |
| N | Q7LZI6 | CC | It inhibits the binding of vWF to platelets.                                                                                                                                                                                                                                 |
| N | Q7LZI6 | DE | Tokaracetin subunit beta;                                                                                                                                                                                                                                                    |
| N | Q7LZI6 | DR | sugar binding                                                                                                                                                                                                                                                                |
| N | Q7M459 | CC | Water-borne pheromone that attract the marine mollusk Aplysia into breeding aggregations and coordinate male and female reproductive behavior within the aggregation (By similarity).                                                                                        |
| N | Q7M459 | DR | mating pheromone activity                                                                                                                                                                                                                                                    |
| N | Q7M459 | DR | sexual reproduction                                                                                                                                                                                                                                                          |
| N | Q7M4F3 | CC | Component of the abdominal endocuticle.                                                                                                                                                                                                                                      |
| N | Q7M4F3 | DE | Endocuticle structural glycoprotein SgAbd-2;                                                                                                                                                                                                                                 |
| N | Q7M4F3 | DR | structural constituent of cuticle                                                                                                                                                                                                                                            |
| N | Q7M8E0 | CC | Binds the lower part of the 30S subunit head                                                                                                                                                                                                                                 |
| N | Q7M8E0 | CC | Binds mRNA in the 70S ribosome, positioning it for translation (By similarity).                                                                                                                                                                                              |
| N | Q7M8E0 | DE | 30S ribosomal protein S3;                                                                                                                                                                                                                                                    |
| N | Q7M8E0 | DR | structural constituent of ribosome                                                                                                                                                                                                                                           |
| N | Q7M936 | CC | Catalyzes the conversion of D-ribose 5-phosphate to formate and 3,4-dihydroxy-2-butanone 4-phosphate (By similarity).                                                                                                                                                        |
| N | Q7M936 | DE | 3,4-dihydroxy-2-butanone 4-phosphate synthase;                                                                                                                                                                                                                               |
| N | Q7M936 | DE | DHBP synthase;                                                                                                                                                                                                                                                               |
| N | Q7M936 | DR | 3,4-dihydroxy-2-butanone-4-phosphate synthase activity                                                                                                                                                                                                                       |
| N | Q7M936 | DR | GTP cyclohydrolase II activity                                                                                                                                                                                                                                               |
| N | Q7M936 | DR | metal ion binding                                                                                                                                                                                                                                                            |
| N | Q7M936 | DR | riboflavin biosynthetic process                                                                                                                                                                                                                                              |
| N | Q7MF12 | CC | Can catalyze the oxidation of choline to betaine aldehyde and betaine aldehyde to glycine betaine (By similarity).                                                                                                                                                           |
| N | Q7MF12 | DE | Choline dehydrogenase;                                                                                                                                                                                                                                                       |
| N | Q7MF12 | DR | choline dehydrogenase activity                                                                                                                                                                                                                                               |
| N | Q7MF12 | DR | flavin adenine dinucleotide binding                                                                                                                                                                                                                                          |
| N | Q7MF12 | DR | glycine betaine biosynthetic process from choline                                                                                                                                                                                                                            |
| N | Q7MF12 | DR | oxidation-reduction process                                                                                                                                                                                                                                                  |
| N | Q7MGH6 | CC | F(1)F(0) ATP synthase produces ATP from ADP in the presence of a proton or sodium gradient                                                                                                                                                                                   |
| N | Q7MGH6 | CC | During catalysis, ATP synthesis in the catalytic domain of F(1) is coupled via a rotary mechanism of the central stalk subunits to proton translocation (By similarity)                                                                                                      |
| N | Q7MGH6 | CC | F-type ATPases consist of two structural domains, F(1) containing the extramembraneous catalytic core and F(0) containing the membrane proton channel, linked together by a central stalk and a peripheral stalk                                                             |
| N | Q7MGH6 | DE | ATP synthase F(0) sector subunit b;                                                                                                                                                                                                                                          |
| N | Q7MGH6 | DE | ATP synthase subunit b;                                                                                                                                                                                                                                                      |
| N | Q7MGH6 | DE | ATPase subunit I;                                                                                                                                                                                                                                                            |
| N | Q7MGH6 | DE | F-ATPase subunit b;                                                                                                                                                                                                                                                          |
| N | Q7MGH6 | DE | F-type ATPase subunit b;                                                                                                                                                                                                                                                     |
| N | Q7MGH6 | DR | ATP synthesis coupled proton transport                                                                                                                                                                                                                                       |
| N | Q7MGH6 | DR | hydrogen ion transmembrane transporter activity                                                                                                                                                                                                                              |
| N | Q7MHP1 | CC | Catalyzes the complicated ring closure reaction between the two acyclic compounds 1-deoxy-D-xylulose-5-phosphate (DXP) and 3-amino-2-oxopropyl phosphate (1-amino-acetone-3-phosphate or AAP) to form pyridoxine 5'-phosphate (PNP) and inorganic phosphate (By similarity). |
| N | Q7MHP1 | DE | PNP synthase;                                                                                                                                                                                                                                                                |
| N | Q7MHP1 | DE | Pyridoxine 5'-phosphate synthase;                                                                                                                                                                                                                                            |
| N | Q7MHP1 | DR | pyridoxine 5'-phosphate synthase activity                                                                                                                                                                                                                                    |
| N | Q7MHP1 | DR | pyridoxine biosynthetic process                                                                                                                                                                                                                                              |
| N | Q7MNP1 | CC | Sequence-specific endonuclease that cleaves unmethylated GATC sequences                                                                                                                                                                                                      |

|   |        |    |                                                                                                                                                                                                                                                                                                              |
|---|--------|----|--------------------------------------------------------------------------------------------------------------------------------------------------------------------------------------------------------------------------------------------------------------------------------------------------------------|
| N | Q7MNP1 | CC | It is involved in DNA mismatch repair (By similarity).                                                                                                                                                                                                                                                       |
| N | Q7MNP1 | DE | DNA mismatch repair protein mutH;                                                                                                                                                                                                                                                                            |
| N | Q7MNP1 | DE | Methyl-directed mismatch repair protein;                                                                                                                                                                                                                                                                     |
| N | Q7MNP1 | DR | DNA modification                                                                                                                                                                                                                                                                                             |
| N | Q7MNP1 | DR | endonuclease activity                                                                                                                                                                                                                                                                                        |
| N | Q7MPY4 | CC | Involved in iron-sulfur cluster biogenesis                                                                                                                                                                                                                                                                   |
| N | Q7MPY4 | CC | Binds a 4Fe- 4S cluster, can transfer this cluster to apoproteins, and thereby intervenes in the maturation of Fe/S proteins                                                                                                                                                                                 |
| N | Q7MPY4 | CC | Could also act as a scaffold/chaperone for damaged Fe/S proteins (By similarity).                                                                                                                                                                                                                            |
| N | Q7MPY4 | DE | Fe/S biogenesis protein nfuA;                                                                                                                                                                                                                                                                                |
| N | Q7MPY4 | DR | 4 iron, 4 sulfur cluster binding                                                                                                                                                                                                                                                                             |
| N | Q7MPY4 | DR | iron ion binding                                                                                                                                                                                                                                                                                             |
| N | Q7MPY4 | DR | iron-sulfur cluster assembly                                                                                                                                                                                                                                                                                 |
| N | Q7MPY4 | DR | protein maturation                                                                                                                                                                                                                                                                                           |
| N | Q7MU43 | CC | Binds directly to 16S ribosomal RNA (By similarity).                                                                                                                                                                                                                                                         |
| N | Q7MU43 | DE | 30S ribosomal protein S20;                                                                                                                                                                                                                                                                                   |
| N | Q7MU43 | DR | structural constituent of ribosome                                                                                                                                                                                                                                                                           |
| N | Q7MVD7 | CC | Catalyzes the attachment of valine to tRNA(Val)<br>As valKS can inadvertently accommodate and process structurally similar amino acids such as threonine, to avoid such errors, it has a "posttransfer" editing activity that hydrolyzes mischarged Thr-tRNA(Val) in a tRNA-dependent manner (By similarity) |
| N | Q7MVD7 | CC | Valine--tRNA ligase;                                                                                                                                                                                                                                                                                         |
| N | Q7MVD7 | DE | Valyl-tRNA synthetase;                                                                                                                                                                                                                                                                                       |
| N | Q7MVD7 | DR | valine-tRNA ligase activity                                                                                                                                                                                                                                                                                  |
| N | Q7MVD7 | DR | valyl-tRNA aminoacylation                                                                                                                                                                                                                                                                                    |
| N | Q7MXM0 | DE | Aspartate--tRNA ligase;                                                                                                                                                                                                                                                                                      |
| N | Q7MXM0 | DE | Aspartyl-tRNA synthetase;                                                                                                                                                                                                                                                                                    |
| N | Q7MXM0 | DR | aspartate-tRNA ligase activity                                                                                                                                                                                                                                                                               |
| N | Q7MXM0 | DR | aspartyl-tRNA aminoacylation                                                                                                                                                                                                                                                                                 |
| N | Q7MXM0 | DR | nucleic acid binding                                                                                                                                                                                                                                                                                         |
| N | Q7MXZ1 | CC | Plays an important role in the initiation and regulation of chromosomal replication                                                                                                                                                                                                                          |
| N | Q7MXZ1 | CC | Binds to the origin of replication; it binds specifically double-stranded DNA at a 9 bp consensus (dnaA box): 5'-TTATC[CA]A[CA]A-3'                                                                                                                                                                          |
| N | Q7MXZ1 | CC | DnaA binds to ATP and to acidic phospholipids (By similarity).                                                                                                                                                                                                                                               |
| N | Q7MXZ1 | DE | Chromosomal replication initiator protein DnaA;                                                                                                                                                                                                                                                              |
| N | Q7MXZ1 | DR | DNA replication origin binding                                                                                                                                                                                                                                                                               |
| N | Q7MXZ1 | DR | DNA-dependent DNA replication initiation                                                                                                                                                                                                                                                                     |
| N | Q7MXZ1 | DR | nucleoside-triphosphatase activity                                                                                                                                                                                                                                                                           |
| N | Q7MXZ1 | DR | regulation of DNA replication                                                                                                                                                                                                                                                                                |
| N | Q7MYY7 | CC | One of the essential components for the initiation of protein synthesis                                                                                                                                                                                                                                      |
| N | Q7MYY7 | CC | Also involved in the hydrolysis of GTP during the formation of the 70S ribosomal complex (By similarity).                                                                                                                                                                                                    |
| N | Q7MYY7 | CC | Protects formylmethionyl-tRNA from spontaneous hydrolysis and promotes its binding to the 30S ribosomal subunits                                                                                                                                                                                             |
| N | Q7MYY7 | DE | Translation initiation factor IF-2;                                                                                                                                                                                                                                                                          |
| N | Q7MYY7 | DR | GTPase activity                                                                                                                                                                                                                                                                                              |
| N | Q7MYY7 | DR | translation initiation factor activity                                                                                                                                                                                                                                                                       |
| N | Q7N2H0 | CC | Catalyzes the hydrolysis of N(2)-succinylarginine into N(2)-succinylornithine, ammonia and CO(2) (By similarity).                                                                                                                                                                                            |
| N | Q7N2H0 | DE | N-succinylarginine dihydrolase;                                                                                                                                                                                                                                                                              |
| N | Q7N2H0 | DR | N-succinylarginine dihydrolase activity                                                                                                                                                                                                                                                                      |
| N | Q7N2H0 | DR | arginine metabolic process                                                                                                                                                                                                                                                                                   |
| N | Q7N2U4 | CC | Catalyzes the synthesis of alpha-ribazole-5'-phosphate from nicotinate mononucleotide (NAMN) and 5,6- dimethylbenzimidazole (DMB).                                                                                                                                                                           |
| N | Q7N2U4 | DE | N(1)-alpha-phosphoribosyltransferase;                                                                                                                                                                                                                                                                        |
| N | Q7N2U4 | DE | NN:DBI PRT;                                                                                                                                                                                                                                                                                                  |
| N | Q7N2U4 | DE | Nicotinate-nucleotide--dimethylbenzimidazole phosphoribosyltransferase;                                                                                                                                                                                                                                      |
| N | Q7N2U4 | DR | cobalamin biosynthetic process                                                                                                                                                                                                                                                                               |
| N | Q7N2U4 | DR | nicotinate-nucleotide-dimethylbenzimidazole phosphoribosyltransferase activity                                                                                                                                                                                                                               |
| N | Q7N2U4 | DR | nucleoside biosynthetic process                                                                                                                                                                                                                                                                              |
| N | Q7N8N7 | DE | UDP-3-O-[3-hydroxymyristoyl] glucosamine N-acyltransferase;                                                                                                                                                                                                                                                  |
| N | Q7N8N7 | DR | acyltransferase activity                                                                                                                                                                                                                                                                                     |
| N | Q7N8N7 | DR | lipid A biosynthetic process                                                                                                                                                                                                                                                                                 |

|   |        |    |                                                                                                                                                                                                                                                                |
|---|--------|----|----------------------------------------------------------------------------------------------------------------------------------------------------------------------------------------------------------------------------------------------------------------|
| N | Q7N8N8 | CC | Molecular chaperone that interacts specifically with outer membrane proteins, thus maintaining the solubility of early folding intermediates during passage through the periplasm (By similarity).                                                             |
| N | Q7N8N8 | DE | Chaperone protein skp;                                                                                                                                                                                                                                         |
| N | Q7N8N8 | DR | unfolded protein binding                                                                                                                                                                                                                                       |
| N | Q7NB34 | DE | 50S ribosomal protein L33 1;                                                                                                                                                                                                                                   |
| N | Q7NB34 | DR | structural constituent of ribosome                                                                                                                                                                                                                             |
| N | Q7NBP5 | CC | Catalyzes the attachment of proline to tRNA(Pro) in a two-step reaction: proline is first activated by ATP to form Pro- AMP and then transferred to the acceptor end of tRNA(Pro) (By similarity).                                                             |
| N | Q7NBP5 | DE | Proline--tRNA ligase;                                                                                                                                                                                                                                          |
| N | Q7NBP5 | DE | Prolyl-tRNA synthetase;                                                                                                                                                                                                                                        |
| N | Q7NBP5 | DR | proline-tRNA ligase activity                                                                                                                                                                                                                                   |
| N | Q7NBP5 | DR | prolyl-tRNA aminoacylation                                                                                                                                                                                                                                     |
| N | Q7NDU3 | DE | UPF0284 protein glr4139;                                                                                                                                                                                                                                       |
| N | Q7NDU3 | DR | cobalamin biosynthetic process                                                                                                                                                                                                                                 |
| N | Q7NDU3 | DR | nicotinate-nucleotide-dimethylbenzimidazole phosphoribosyltransferase activity                                                                                                                                                                                 |
| N | Q7NEW2 | CC | Cleaves peptides in various proteins in a process that requires ATP hydrolysis                                                                                                                                                                                 |
| N | Q7NEW2 | CC | Has a chymotrypsin-like activity                                                                                                                                                                                                                               |
| N | Q7NEW2 | CC | Plays a major role in the degradation of misfolded proteins (By similarity).                                                                                                                                                                                   |
| N | Q7NEW2 | DE | ATP-dependent Clp protease proteolytic subunit 1;                                                                                                                                                                                                              |
| N | Q7NEW2 | DE | Endopeptidase Clp 1;                                                                                                                                                                                                                                           |
| N | Q7NEW2 | DR | serine-type endopeptidase activity                                                                                                                                                                                                                             |
| N | Q7NFA4 | CC | Converts 2C-methyl-D-erythritol 2,4-cyclodiphosphate (ME-2,4cPP) into 1-hydroxy-2-methyl-2-(E)-butenyl 4-diphosphate (By similarity).                                                                                                                          |
| N | Q7NFA4 | DE | 1-hydroxy-2-methyl-2-(E)-butenyl 4-diphosphate synthase;                                                                                                                                                                                                       |
| N | Q7NFA4 | DE | 4-hydroxy-3-methylbut-2-en-1-yl diphosphate synthase;                                                                                                                                                                                                          |
| N | Q7NFA4 | DR | 4 iron, 4 sulfur cluster binding                                                                                                                                                                                                                               |
| N | Q7NFA4 | DR | 4-hydroxy-3-methylbut-2-en-1-yl diphosphate synthase activity                                                                                                                                                                                                  |
| N | Q7NFA4 | DR | iron ion binding                                                                                                                                                                                                                                               |
| N | Q7NFA4 | DR | oxidation-reduction process                                                                                                                                                                                                                                    |
| N | Q7NFA4 | DR | terpenoid biosynthetic process                                                                                                                                                                                                                                 |
| N | Q7NFM6 | DE | UPF0133 protein glr3498;                                                                                                                                                                                                                                       |
| N | Q7NGV3 | CC | Binds directly to 23S ribosomal RNA and is necessary for the in vitro assembly process of the 50S ribosomal subunit<br>it is not involved in the protein synthesizing functions of that subunit (By similarity)                                                |
| N | Q7NGV3 | CC |                                                                                                                                                                                                                                                                |
| N | Q7NGV3 | DE | 50S ribosomal protein L20;                                                                                                                                                                                                                                     |
| N | Q7NGV3 | DR | structural constituent of ribosome                                                                                                                                                                                                                             |
| N | Q7NNG8 | CC | Catalyzes the last two sequential reactions in the de novo biosynthetic pathway for UDP-GlcNAc<br>responsible for the acetylation of Glc-N-1-P to give GlcNAc-1-P and for the uridyl transfer from UTP to GlcNAc-1-P which produces UDP-GlcNAc (By similarity) |
| N | Q7NNG8 | CC |                                                                                                                                                                                                                                                                |
| N | Q7NNG8 | DE | Bifunctional protein glmU;                                                                                                                                                                                                                                     |
| N | Q7NNG8 | DE | Glucosamine-1-phosphate N-acetyltransferase;                                                                                                                                                                                                                   |
| N | Q7NNG8 | DE | N-acetylglucosamine-1-phosphate uridyltransferase;                                                                                                                                                                                                             |
| N | Q7NNG8 | DE | UDP-N-acetylglucosamine pyrophosphorylase;                                                                                                                                                                                                                     |
| N | Q7NNG8 | DR | UDP-N-acetylglucosamine diphosphorylase activity                                                                                                                                                                                                               |
| N | Q7NNG8 | DR | cell morphogenesis                                                                                                                                                                                                                                             |
| N | Q7NNG8 | DR | cellular cell wall organization                                                                                                                                                                                                                                |
| N | Q7NNG8 | DR | glucosamine-1-phosphate N-acetyltransferase activity                                                                                                                                                                                                           |
| N | Q7NNG8 | DR | lipopolysaccharide biosynthetic process                                                                                                                                                                                                                        |
| N | Q7NNG8 | DR | magnesium ion binding                                                                                                                                                                                                                                          |
| N | Q7NNG8 | DR | peptidoglycan biosynthetic process                                                                                                                                                                                                                             |
| N | Q7NNG8 | DR | regulation of cell shape                                                                                                                                                                                                                                       |
| N | Q7NZD3 | CC | Methyltransferase required for the conversion of dimethylmenaquinone (DMKH2) to menaquinone (MKH2) and the conversion of 2-polyprenyl-6-methoxy-1,4-benzoquinol (DDMQH2) to 2-polyprenyl-3-methyl-6-methoxy-1,4-benzoquinol (DMQH2) (By similarity).           |
| N | Q7NZD3 | DE | Ubiquinone/menaquinone biosynthesis methyltransferase ubiE;                                                                                                                                                                                                    |
| N | Q7NZD3 | DR | menaquinone biosynthetic process                                                                                                                                                                                                                               |
| N | Q7NZD3 | DR | methyltransferase activity                                                                                                                                                                                                                                     |
| N | Q7NZD3 | DR | ubiquinone biosynthetic process                                                                                                                                                                                                                                |
| N | Q7PRA4 | CC | Required for polyglutamylation of axonemal tubulin in sensory cilia (By similarity)                                                                                                                                                                            |



|   |        |    |                                                                                                                                                                                                                                                                       |
|---|--------|----|-----------------------------------------------------------------------------------------------------------------------------------------------------------------------------------------------------------------------------------------------------------------------|
| N | Q7PRA4 | CC | Plays a role in anterograde intraflagellar transport (IFT), the process by which cilia precursors are transported from the base of the cilium to the site of their incorporation at the tip (By similarity).                                                          |
| N | Q7PRA4 | DE | TPR repeat protein 30 homolog;                                                                                                                                                                                                                                        |
| N | Q7PRA4 | DE | Tetratricopeptide repeat protein 30 homolog;                                                                                                                                                                                                                          |
| N | Q7PRA4 | DR | intraflagellar transport                                                                                                                                                                                                                                              |
| N | Q7PRA4 | DR | protein polyglutamylation                                                                                                                                                                                                                                             |
| N | Q7PRA4 | DR | transporter activity                                                                                                                                                                                                                                                  |
| N | Q7SAC2 | CC | Probable mitochondrial mRNA stabilization factor (By similarity).                                                                                                                                                                                                     |
| N | Q7SAC2 | DE | ATPase synthesis protein 25, mitochondrial;                                                                                                                                                                                                                           |
| N | Q7SAK5 | CC | Involved in pre-mRNA splicing and cell cycle progression (By similarity).                                                                                                                                                                                             |
| N | Q7SAK5 | DE | Pre-mRNA-splicing factor syf-1;                                                                                                                                                                                                                                       |
| N | Q7SAK5 | DR | mRNA processing                                                                                                                                                                                                                                                       |
| N | Q7T3N6 | DE | 60S ribosomal protein L15;                                                                                                                                                                                                                                            |
| N | Q7T3N6 | DR | structural constituent of ribosome                                                                                                                                                                                                                                    |
| N | Q7TMQ7 | DE | WD repeat-containing protein 91;                                                                                                                                                                                                                                      |
| N | Q7TNV9 | CC | Has antibacterial activity (By similarity).                                                                                                                                                                                                                           |
| N | Q7TNV9 | DE | Beta-defensin 14;                                                                                                                                                                                                                                                     |
| N | Q7TNV9 | DE | Defensin, beta 14;                                                                                                                                                                                                                                                    |
| N | Q7TNV9 | DR | defense response to bacterium                                                                                                                                                                                                                                         |
| N | Q7TUZ8 | CC | Binds as a heterodimer with protein S6 to the central domain of the 16S rRNA, where it helps stabilize the platform of the 30S subunit (By similarity).                                                                                                               |
| N | Q7TUZ8 | DE | 30S ribosomal protein S18;                                                                                                                                                                                                                                            |
| N | Q7TUZ8 | DR | structural constituent of ribosome                                                                                                                                                                                                                                    |
| N | Q7TZ12 | CC | Protein modifier that is covalently attached to lysine residues of substrate proteins, thereby targeting them for proteasomal degradation                                                                                                                             |
| N | Q7TZ12 | CC | The tagging system is termed pupylation (By similarity).                                                                                                                                                                                                              |
| N | Q7TZ12 | DE | Bacterial ubiquitin-like modifier;                                                                                                                                                                                                                                    |
| N | Q7TZ12 | DE | Prokaryotic ubiquitin-like protein Pup;                                                                                                                                                                                                                               |
| N | Q7U2U1 | CC | Converts the D-glycero-alpha-D-manno-heptose 1,7- bisphosphate intermediate into D-glycero-alpha-D-manno-heptose 1- phosphate by removing the phosphate group at the C-7 position (By similarity).                                                                    |
| N | Q7U2U1 | DE | D,D-heptose 1,7-bisphosphate phosphatase;                                                                                                                                                                                                                             |
| N | Q7U2U1 | DE | D-glycero-D-manno-heptose 1,7-bisphosphate phosphatase;                                                                                                                                                                                                               |
| N | Q7U2U1 | DR | carbohydrate metabolic process                                                                                                                                                                                                                                        |
| N | Q7U2U1 | DR | phosphatase activity                                                                                                                                                                                                                                                  |
| N | Q7U437 | CC | Phosphorylation of dTMP to form dTDP in both de novo and salvage pathways of dTTP synthesis (By similarity).                                                                                                                                                          |
| N | Q7U437 | DE | Thymidylate kinase;                                                                                                                                                                                                                                                   |
| N | Q7U437 | DE | dTMP kinase;                                                                                                                                                                                                                                                          |
| N | Q7U437 | DR | dTDP biosynthetic process                                                                                                                                                                                                                                             |
| N | Q7U437 | DR | thymidylate kinase activity                                                                                                                                                                                                                                           |
| N | Q7U4D9 | CC | Catalyzes the radical-mediated insertion of two sulfur atoms into the C-6 and C-8 positions of the octanoyl moiety bound to the lipoyl domains of lipoate-dependent enzymes, thereby converting the octanoylated domains into lipoylated derivatives (By similarity). |
| N | Q7U4D9 | DE | Lipoate synthase 1;                                                                                                                                                                                                                                                   |
| N | Q7U4D9 | DE | Lipoic acid synthase 1;                                                                                                                                                                                                                                               |
| N | Q7U4D9 | DE | Lipoyl synthase 1;                                                                                                                                                                                                                                                    |
| N | Q7U4D9 | DE | Sulfur insertion protein lipA1;                                                                                                                                                                                                                                       |
| N | Q7U4D9 | DR | 4 iron, 4 sulfur cluster binding                                                                                                                                                                                                                                      |
| N | Q7U4D9 | DR | lipoate biosynthetic process                                                                                                                                                                                                                                          |
| N | Q7U4D9 | DR | lipoate synthase activity                                                                                                                                                                                                                                             |
| N | Q7U4D9 | DR | metal ion binding                                                                                                                                                                                                                                                     |
| N | Q7U4J9 | CC | One of the primary rRNA binding proteins, this protein initially binds near the 5'-end of the 23S rRNA                                                                                                                                                                |
| N | Q7U4J9 | CC | It is important during the early stages of 50S assembly                                                                                                                                                                                                               |
| N | Q7U4J9 | CC | It makes multiple contacts with different domains of the 23S rRNA in the assembled 50S subunit and ribosome (By similarity).                                                                                                                                          |
| N | Q7U4J9 | DE | 50S ribosomal protein L4;                                                                                                                                                                                                                                             |
| N | Q7U4J9 | DR | structural constituent of ribosome                                                                                                                                                                                                                                    |
| N | Q7U4P7 | CC | Catalyzes the two-electron reduction of biliverdin IX- alpha at the C15 methine bridge (By similarity).                                                                                                                                                               |
| N | Q7U4P7 | DE | 15,16-dihydrobiliverdin:ferredoxin oxidoreductase;                                                                                                                                                                                                                    |
| N | Q7U4P7 | DR | 15,16-dihydrobiliverdin:ferredoxin oxidoreductase activity                                                                                                                                                                                                            |

|   |        |    |                                                                                                                                                                                                                                   |
|---|--------|----|-----------------------------------------------------------------------------------------------------------------------------------------------------------------------------------------------------------------------------------|
| N | Q7U4P7 | DR | cobalt ion binding                                                                                                                                                                                                                |
| N | Q7U4P7 | DR | oxidation-reduction process                                                                                                                                                                                                       |
| N | Q7U4P7 | DR | phytochromobilin biosynthetic process                                                                                                                                                                                             |
| N | Q7U8W4 | CC | produces ATR from ALR in the presence of a proton gradient across the membrane                                                                                                                                                    |
| N | Q7U8W4 | CC | The gamma chain is believed to be important in regulating ATPase activity and the flow of protons through the CF(0) complex.                                                                                                      |
| N | Q7U8W4 | DE | ATP synthase F1 sector gamma subunit;                                                                                                                                                                                             |
| N | Q7U8W4 | DE | ATP synthase gamma chain;                                                                                                                                                                                                         |
| N | Q7U8W4 | DE | F-ATPase gamma subunit;                                                                                                                                                                                                           |
| N | Q7U8W4 | DR | ATP synthesis coupled proton transport                                                                                                                                                                                            |
| N | Q7U8W4 | DR | hydrogen ion transporting ATP synthase activity, rotational mechanism                                                                                                                                                             |
| N | Q7U8W4 | DR | proton-transporting ATPase activity, rotational mechanism                                                                                                                                                                         |
| N | Q7UDG0 | DE | Putative protein hokF;                                                                                                                                                                                                            |
| N | Q7UJK0 | CC | Has an important function as a repair enzyme for proteins that have been inactivated by oxidation                                                                                                                                 |
| N | Q7UJK0 | CC | Catalyzes the reversible oxidation-reduction of methionine sulfoxide in proteins to methionine (By similarity).                                                                                                                   |
| N | Q7UJK0 | DE | Peptide Met(O) reductase 1;                                                                                                                                                                                                       |
| N | Q7UJK0 | DE | Peptide methionine sulfoxide reductase MsrA 1;                                                                                                                                                                                    |
| N | Q7UJK0 | DE | Peptide-methionine (S)-S-oxide reductase 1;                                                                                                                                                                                       |
| N | Q7UJK0 | DE | Protein-methionine-S-oxide reductase 1;                                                                                                                                                                                           |
| N | Q7UJK0 | DR | oxidation-reduction process                                                                                                                                                                                                       |
| N | Q7UJK0 | DR | peptide-methionine-(S)-S-oxide reductase activity                                                                                                                                                                                 |
| N | Q7UJK0 | DR | protein metabolic process                                                                                                                                                                                                         |
| N | Q7UQJ2 | DE | UPF0365 protein RB6291;                                                                                                                                                                                                           |
| N | Q7UR95 | CC | Involved in mRNA degradation                                                                                                                                                                                                      |
| N | Q7UR95 | CC | Hydrolyzes single-stranded polyribonucleotides processively in the 3'- to 5'-direction (By similarity).                                                                                                                           |
| N | Q7UR95 | DE | Polynucleotide phosphorylase;                                                                                                                                                                                                     |
| N | Q7UR95 | DE | Polyribonucleotide nucleotidyltransferase;                                                                                                                                                                                        |
| N | Q7UR95 | DR | 3'-5'-exoribonuclease activity                                                                                                                                                                                                    |
| N | Q7UR95 | DR | RNA processing                                                                                                                                                                                                                    |
| N | Q7UR95 | DR | mRNA catabolic process                                                                                                                                                                                                            |
| N | Q7UR95 | DR | polyribonucleotide nucleotidyltransferase activity                                                                                                                                                                                |
| N | Q7V1V0 | DE | 30S ribosomal protein S2;                                                                                                                                                                                                         |
| N | Q7V1V0 | DR | structural constituent of ribosome                                                                                                                                                                                                |
| N | Q7V2D0 | CC | RuBisCO catalyzes two reactions: the carboxylation of D- ribulose 1,5-bisphosphate, the primary event in carbon dioxide fixation, as well as the oxidative fragmentation of the pentose substrate in the photorespiration process |
| N | Q7V2D0 | CC | Both reactions occur simultaneously and in competition at the same active site (By similarity).                                                                                                                                   |
| N | Q7V2D0 | DE | Ribulose biphosphate carboxylase large chain;                                                                                                                                                                                     |
| N | Q7V2D0 | DE | RuBisCO large subunit;                                                                                                                                                                                                            |
| N | Q7V2D0 | DR | magnesium ion binding                                                                                                                                                                                                             |
| N | Q7V2D0 | DR | monooxygenase activity                                                                                                                                                                                                            |
| N | Q7V2D0 | DR | oxidation-reduction process                                                                                                                                                                                                       |
| N | Q7V2D0 | DR | photorespiration                                                                                                                                                                                                                  |
| N | Q7V2D0 | DR | reductive pentose-phosphate cycle                                                                                                                                                                                                 |
| N | Q7V2D0 | DR | ribulose-bisphosphate carboxylase activity                                                                                                                                                                                        |
| N | Q7V3M9 | CC | Catalyzes the biosynthesis of agmatine from arginine (By similarity).                                                                                                                                                             |
| N | Q7V3M9 | DE | Biosynthetic arginine decarboxylase;                                                                                                                                                                                              |
| N | Q7V3M9 | DR | arginine catabolic process                                                                                                                                                                                                        |
| N | Q7V3M9 | DR | arginine decarboxylase activity                                                                                                                                                                                                   |
| N | Q7V3M9 | DR | metal ion binding                                                                                                                                                                                                                 |
| N | Q7V3M9 | DR | spermidine biosynthetic process                                                                                                                                                                                                   |
| N | Q7V3T5 | CC | Acts as a chaperone (By similarity).                                                                                                                                                                                              |
| N | Q7V3T5 | DE | Chaperone protein dnaK2;                                                                                                                                                                                                          |
| N | Q7V3T5 | DE | Heat shock 70 kDa protein 2;                                                                                                                                                                                                      |
| N | Q7V3T5 | DE | Heat shock protein 70-2;                                                                                                                                                                                                          |
| N | Q7V3T5 | DR | protein folding                                                                                                                                                                                                                   |
| N | Q7V3T5 | DR | response to stress                                                                                                                                                                                                                |
| N | Q7V3T5 | DR | unfolded protein binding                                                                                                                                                                                                          |
| N | Q7V531 | CC | This protein binds to the 23S rRNA, and is important in its secondary structure                                                                                                                                                   |
| N | Q7V531 | CC | It is located near the subunit interface in the base of the L7/L12 stalk, and near the tRNA binding site of the peptidyltransferase center (By similarity).                                                                       |

|   |        |    |                                                                                                                                                                                       |
|---|--------|----|---------------------------------------------------------------------------------------------------------------------------------------------------------------------------------------|
| N | Q7V531 | DE | 50S ribosomal protein L6;                                                                                                                                                             |
| N | Q7V531 | DR | structural constituent of ribosome                                                                                                                                                    |
| N | Q7V7L7 | CC | The UvrABC repair system catalyzes the recognition and processing of DNA lesions.                                                                                                     |
| N | Q7V7L7 | CC | The N-terminal half is responsible for the 3' incision and the C-terminal half is responsible for the 5' incision (By similarity).                                                    |
| N | Q7V7L7 | CC | UvrC both incises the 5' and 3' sides of the lesion                                                                                                                                   |
| N | Q7V7L7 | DE | Excinuclease ABC subunit C;                                                                                                                                                           |
| N | Q7V7L7 | DE | Protein uvrC;                                                                                                                                                                         |
| N | Q7V7L7 | DE | UvrABC system protein C;                                                                                                                                                              |
| N | Q7V7L7 | DR | excinuclease ABC activity                                                                                                                                                             |
| N | Q7V7L7 | DR | nucleotide-excision repair                                                                                                                                                            |
| N | Q7V926 | CC | May play a key role in the regulation of the intracellular concentration of adenosylhomocysteine (By similarity).                                                                     |
| N | Q7V926 | DE | Adenosylhomocysteinase;                                                                                                                                                               |
| N | Q7V926 | DE | S-adenosyl-L-homocysteine hydrolase;                                                                                                                                                  |
| N | Q7V926 | DR | adenosylhomocysteinase activity                                                                                                                                                       |
| N | Q7V926 | DR | one-carbon metabolic process                                                                                                                                                          |
| N | Q7VEU0 | CC | Catalyzes the 1,3-allylic rearrangement of the homoallylic substrate isopentenyl (IPP) to its highly electrophilic allylic isomer, dimethylallyl diphosphate (DMAPP) (By similarity). |
| N | Q7VEU0 | DE | IPP isomerase;                                                                                                                                                                        |
| N | Q7VEU0 | DE | IPP:DMAPP isomerase;                                                                                                                                                                  |
| N | Q7VEU0 | DE | Isopentenyl pyrophosphate isomerase;                                                                                                                                                  |
| N | Q7VEU0 | DE | Isopentenyl-diphosphate Delta-isomerase;                                                                                                                                              |
| N | Q7VEU0 | DR | hydrolase activity                                                                                                                                                                    |
| N | Q7VEU0 | DR | isopentenyl-diphosphate delta-isomerase activity                                                                                                                                      |
| N | Q7VEU0 | DR | isoprenoid biosynthetic process                                                                                                                                                       |
| N | Q7VEU0 | DR | metal ion binding                                                                                                                                                                     |
| N | Q7VFL1 | CC | Interconversion of serine and glycine.                                                                                                                                                |
| N | Q7VFL1 | DE | Serine hydroxymethyltransferase;                                                                                                                                                      |
| N | Q7VFL1 | DE | Serine methylase;                                                                                                                                                                     |
| N | Q7VFL1 | DR | L-serine metabolic process                                                                                                                                                            |
| N | Q7VFL1 | DR | glycine hydroxymethyltransferase activity                                                                                                                                             |
| N | Q7VFL1 | DR | glycine metabolic process                                                                                                                                                             |
| N | Q7VFL1 | DR | one-carbon metabolic process                                                                                                                                                          |
| N | Q7VFL1 | DR | pyridoxal phosphate binding                                                                                                                                                           |
| N | Q7VH68 | DE | UDP-3-O-[3-hydroxymyristoyl] glucosamine N-acyltransferase;                                                                                                                           |
| N | Q7VH68 | DR | acyltransferase activity                                                                                                                                                              |
| N | Q7VH68 | DR | lipid A biosynthetic process                                                                                                                                                          |
| N | Q7VIA7 | CC | Furnishes a means for formation of correctly charged Gln-tRNA(Gln) through the transamidation of misacylated Glu- tRNA(Gln) in organisms which lack glutaminyl-tRNA synthetase        |
| N | Q7VIA7 | CC | The reaction takes place in the presence of glutamine and ATP through an activated gamma-phospho-Glu-tRNA(Gln) (By similarity).                                                       |
| N | Q7VIA7 | DE | Glu-ADT subunit A;                                                                                                                                                                    |
| N | Q7VIA7 | DE | Glutamyl-tRNA(Gln) amidotransferase subunit A;                                                                                                                                        |
| N | Q7VIA7 | DR | carbon-nitrogen ligase activity, with glutamine as amido-N-donor                                                                                                                      |
| N | Q7VIS3 | DE | Glycine--tRNA ligase alpha subunit;                                                                                                                                                   |
| N | Q7VIS3 | DE | Glycyl-tRNA synthetase alpha subunit;                                                                                                                                                 |
| N | Q7VIS3 | DR | glycine-tRNA ligase activity                                                                                                                                                          |
| N | Q7VIS3 | DR | glycyl-tRNA aminoacylation                                                                                                                                                            |
| N | Q7VJ81 | CC | Seems to be the binding site for several of the factors involved in protein synthesis and appears to be essential for accurate translation (By similarity).                           |
| N | Q7VJ81 | DE | 50S ribosomal protein L7/L12;                                                                                                                                                         |
| N | Q7VJ81 | DR | structural constituent of ribosome                                                                                                                                                    |
| N | Q7VMB7 | CC | Participates actively in the response to hyperosmotic and heat shock by preventing the aggregation of stress-denatured proteins, in association with dnaK and grpE                    |
| N | Q7VMB7 | CC | GrpE releases ADP from dnaK; ATP binding to dnaK triggers the release of the substrate protein, thus completing the reaction cycle                                                    |
| N | Q7VMB7 | CC | It is the nucleotide exchange factor for dnaK and may function as a thermosensor                                                                                                      |
| N | Q7VMB7 | CC | Several rounds of ATP- dependent interactions between dnaJ, dnaK and grpE are required for fully efficient folding (By similarity).                                                   |
| N | Q7VMB7 | CC | Unfolded proteins bind initially to dnaJ; upon interaction with the dnaJ-bound protein, dnaK hydrolyzes its bound ATP, resulting in the formation of a stable complex                 |
| N | Q7VMB7 | DE | HSP-70 cofactor;                                                                                                                                                                      |
| N | Q7VMB7 | DE | Protein grpE;                                                                                                                                                                         |

|   |        |    |                                                                                                                                                                                                                                         |
|---|--------|----|-----------------------------------------------------------------------------------------------------------------------------------------------------------------------------------------------------------------------------------------|
| N | Q7VMB7 | DR | adenyl-nucleotide exchange factor activity                                                                                                                                                                                              |
| N | Q7VMB7 | DR | chaperone binding                                                                                                                                                                                                                       |
| N | Q7VMB7 | DR | protein folding                                                                                                                                                                                                                         |
| N | Q7VMB7 | DR | protein homodimerization activity                                                                                                                                                                                                       |
| N | Q7VMB7 | DR | response to stress                                                                                                                                                                                                                      |
| N | Q7VMZ4 | CC | Required to facilitate the formation of correct disulfide bonds in some periplasmic proteins and for the assembly of the periplasmic c-type cytochromes                                                                                 |
| N | Q7VMZ4 | CC | Acts by transferring electrons from cytoplasmic thioredoxin to the periplasm                                                                                                                                                            |
| N | Q7VMZ4 | CC | This transfer involves a cascade of disulfide bond formation and reduction steps (By similarity).                                                                                                                                       |
| N | Q7VMZ4 | DE | Disulfide reductase;                                                                                                                                                                                                                    |
| N | Q7VMZ4 | DE | Protein-disulfide reductase;                                                                                                                                                                                                            |
| N | Q7VMZ4 | DE | Thiol:disulfide interchange protein DsbD;                                                                                                                                                                                               |
| N | Q7VMZ4 | DR | cell redox homeostasis                                                                                                                                                                                                                  |
| N | Q7VMZ4 | DR | cytochrome complex assembly                                                                                                                                                                                                             |
| N | Q7VMZ4 | DR | electron carrier activity                                                                                                                                                                                                               |
| N | Q7VMZ4 | DR | electron transport chain                                                                                                                                                                                                                |
| N | Q7VMZ4 | DR | glycerol ether metabolic process                                                                                                                                                                                                        |
| N | Q7VMZ4 | DR | protein disulfide oxidoreductase activity                                                                                                                                                                                               |
| N | Q7VMZ4 | DR | protein-disulfide reductase activity                                                                                                                                                                                                    |
| N | Q7VPN5 | CC | Methylates ribosomal protein L11 (By similarity).                                                                                                                                                                                       |
| N | Q7VPN5 | DE | Ribosomal protein L11 methyltransferase;                                                                                                                                                                                                |
| N | Q7VPN5 | DR | protein methyltransferase activity                                                                                                                                                                                                      |
| N | Q7VQD8 | CC | Binds to 23S rRNA                                                                                                                                                                                                                       |
| N | Q7VQD8 | CC | Forms part of two intersubunit bridges in the 70S ribosome (By similarity).                                                                                                                                                             |
| N | Q7VQD8 | DE | 50S ribosomal protein L14;                                                                                                                                                                                                              |
| N | Q7VQD8 | DR | structural constituent of ribosome                                                                                                                                                                                                      |
| N | Q7VQN2 | CC | This protein binds to 23S rRNA in the presence of protein L20 (By similarity).                                                                                                                                                          |
| N | Q7VQN2 | DE | 50S ribosomal protein L21;                                                                                                                                                                                                              |
| N | Q7VQN2 | DR | structural constituent of ribosome                                                                                                                                                                                                      |
| N | Q7VQR0 | DE | 30S ribosomal protein S21;                                                                                                                                                                                                              |
| N | Q7VQR0 | DR | structural constituent of ribosome                                                                                                                                                                                                      |
| N | Q7VRE2 | CC | Catalyzes the NADPr-dependent rearrangement and reduction of 1-deoxy-D-xylulose-5-phosphate (DXP) to 2-C-methyl-D-erythritol 4-phosphate (MEP) (By similarity)                                                                          |
| N | Q7VRE2 | DE | 1-deoxy-D-xylulose 5-phosphate reductoisomerase;                                                                                                                                                                                        |
| N | Q7VRE2 | DE | 1-deoxyxylulose-5-phosphate reductoisomerase;                                                                                                                                                                                           |
| N | Q7VRE2 | DE | 2-C-methyl-D-erythritol 4-phosphate synthase;                                                                                                                                                                                           |
| N | Q7VRE2 | DE | DXP reductoisomerase;                                                                                                                                                                                                                   |
| N | Q7VRE2 | DR | 1-deoxy-D-xylulose-5-phosphate reductoisomerase activity                                                                                                                                                                                |
| N | Q7VRE2 | DR | isoprenoid biosynthetic process                                                                                                                                                                                                         |
| N | Q7VRE2 | DR | metal ion binding                                                                                                                                                                                                                       |
| N | Q7VRE2 | DR | oxidation-reduction process                                                                                                                                                                                                             |
| N | Q7VRV2 | CC | NDH-1 shuttles electrons from NADH, via FMN and iron- sulfur (Fe-S) centers, to quinones in the respiratory chain                                                                                                                       |
| N | Q7VRV2 | CC | Couples the redox reaction to proton translocation (for every two electrons transferred, four hydrogen ions are translocated across the cytoplasmic membrane), and thus conserves the redox energy in a proton gradient (By similarity) |
| N | Q7VRV2 | CC | The immediate electron acceptor for the enzyme in this species is believed to be ubiquinone                                                                                                                                             |
| N | Q7VRV2 | DE | NADH dehydrogenase I subunit A;                                                                                                                                                                                                         |
| N | Q7VRV2 | DE | NADH-quinone oxidoreductase subunit A;                                                                                                                                                                                                  |
| N | Q7VRV2 | DE | NDH-1 subunit A;                                                                                                                                                                                                                        |
| N | Q7VRV2 | DR | NADH dehydrogenase (ubiquinone) activity                                                                                                                                                                                                |
| N | Q7VRV2 | DR | oxidation-reduction process                                                                                                                                                                                                             |
| N | Q7VRV2 | DR | quinone binding                                                                                                                                                                                                                         |
| N | Q7VRY3 | CC | Catalyzes the NADPH-dependent reduction of glutamyl- tRNA(Glu) to glutamate 1-semialdehyde (GSA) (By similarity).                                                                                                                       |
| N | Q7VRY3 | DE | Glutamyl-tRNA reductase;                                                                                                                                                                                                                |
| N | Q7VRY3 | DR | glutamyl-tRNA reductase activity                                                                                                                                                                                                        |
| N | Q7VRY3 | DR | oxidation-reduction process                                                                                                                                                                                                             |
| N | Q7VRY3 | DR | porphyrin biosynthetic process                                                                                                                                                                                                          |
| N | Q7VRY3 | DR | shikimate 5-dehydrogenase activity                                                                                                                                                                                                      |
| N | Q7VUS7 | CC | Catalyzes a trans-dehydration via an enolate intermediate (By similarity).                                                                                                                                                              |
| N | Q7VUS7 | DE | 3-dehydroquinase;                                                                                                                                                                                                                       |
| N | Q7VUS7 | DE | 3-dehydroquinase dehydratase;                                                                                                                                                                                                           |

|   |        |    |                                                                                                                                                                                                                         |
|---|--------|----|-------------------------------------------------------------------------------------------------------------------------------------------------------------------------------------------------------------------------|
| N | Q7VUS7 | DE | Type II DHQase;                                                                                                                                                                                                         |
| N | Q7VUS7 | DR | 3-dehydroquinase dehydratase activity                                                                                                                                                                                   |
| N | Q7VUS7 | DR | aromatic amino acid family biosynthetic process<br>required for the formation of a threonylcarbamoyl group on adenosine at<br>position 37 (t(6)A37) in tRNAs that read codons beginning with adenine (By<br>similarity) |
| N | Q7VXN4 | CC |                                                                                                                                                                                                                         |
| N | Q7VXN4 | DE | Probable tRNA threonylcarbamoyladenine biosynthesis protein Gcp;                                                                                                                                                        |
| N | Q7VXN4 | DE | t(6)A37 threonylcarbamoyladenine biosynthesis protein;                                                                                                                                                                  |
| N | Q7VXN4 | DR | metal ion binding                                                                                                                                                                                                       |
| N | Q7VXN4 | DR | metalloendopeptidase activity                                                                                                                                                                                           |
| N | Q7W179 | CC | The natural substrate for this enzyme may be peptidyl- tRNAs which drop off<br>the ribosome during protein synthesis (By similarity).                                                                                   |
| N | Q7W179 | DE | Peptidyl-tRNA hydrolase;                                                                                                                                                                                                |
| N | Q7W179 | DR | aminoacyl-tRNA hydrolase activity                                                                                                                                                                                       |
| N | Q7W2B6 | DE | 3-dehydroquinase synthase;                                                                                                                                                                                              |
| N | Q7W2B6 | DR | 3-dehydroquinase synthase activity                                                                                                                                                                                      |
| N | Q7W2B6 | DR | aromatic amino acid family biosynthetic process                                                                                                                                                                         |
| N | Q7W2B7 | CC | Catalyzes the specific phosphorylation of the 3-hydroxyl group of shikimic acid<br>using ATP as a cosubstrate (By similarity).                                                                                          |
| N | Q7W2B7 | DE | Shikimate kinase;                                                                                                                                                                                                       |
| N | Q7W2B7 | DR | aromatic amino acid family biosynthetic process                                                                                                                                                                         |
| N | Q7W2B7 | DR | metal ion binding                                                                                                                                                                                                       |
| N | Q7W2B7 | DR | shikimate kinase activity                                                                                                                                                                                               |
| N | Q7W2D9 | CC | This is one of the proteins that binds and probably mediates the attachment of<br>the 5S RNA into the large ribosomal subunit, where it forms part of the central<br>protuberance (By similarity).                      |
| N | Q7W2D9 | DE | 50S ribosomal protein L18;                                                                                                                                                                                              |
| N | Q7W2D9 | DR | structural constituent of ribosome                                                                                                                                                                                      |
| N | Q7W2F2 | CC | Protein S19 forms a complex with S13 that binds strongly to the 16S ribosomal<br>RNA (By similarity).                                                                                                                   |
| N | Q7W2F2 | DE | 30S ribosomal protein S19;                                                                                                                                                                                              |
| N | Q7W2F2 | DR | structural constituent of ribosome                                                                                                                                                                                      |
| N | Q7W9J5 | CC | Cleaves GlcNAc linked beta-1,4 to MurNAc tripeptides (By similarity).                                                                                                                                                   |
| N | Q7W9J5 | DE | Beta-N-acetylhexosaminidase;                                                                                                                                                                                            |
| N | Q7W9J5 | DE | Beta-hexosaminidase;                                                                                                                                                                                                    |
| N | Q7W9J5 | DE | N-acetyl-beta-glucosaminidase;                                                                                                                                                                                          |
| N | Q7W9J5 | DR | beta-N-acetylhexosaminidase activity                                                                                                                                                                                    |
| N | Q7W9J5 | DR | cell division                                                                                                                                                                                                           |
| N | Q7W9J5 | DR | cellular cell wall organization                                                                                                                                                                                         |
| N | Q7W9J5 | DR | peptidoglycan biosynthetic process                                                                                                                                                                                      |
| N | Q7W9J5 | DR | regulation of cell shape                                                                                                                                                                                                |
| N | Q7WBA1 | CC | Necessary for formate dehydrogenase activity (By similarity).                                                                                                                                                           |
| N | Q7WBA1 | DE | Protein FdhD homolog;                                                                                                                                                                                                   |
| N | Q7WBA1 | DR | formate dehydrogenase (NAD+) activity                                                                                                                                                                                   |
| N | Q7WD94 | CC | Catalyzes the reversible oxidation of malate to oxaloacetate (By similarity).                                                                                                                                           |
| N | Q7WD94 | DE | Malate dehydrogenase;                                                                                                                                                                                                   |
| N | Q7WD94 | DR | L-malate dehydrogenase activity                                                                                                                                                                                         |
| N | Q7WD94 | DR | cellular carbohydrate metabolic process                                                                                                                                                                                 |
| N | Q7WD94 | DR | malate metabolic process                                                                                                                                                                                                |
| N | Q7WD94 | DR | tricarboxylic acid cycle                                                                                                                                                                                                |
| N | Q7WGH4 | CC | Cell wall formation (By similarity).                                                                                                                                                                                    |
| N | Q7WGH4 | DE | UDP-N-acetylenolpyruvoylglucosamine reductase;                                                                                                                                                                          |
| N | Q7WGH4 | DE | UDP-N-acetylmuramate dehydrogenase;                                                                                                                                                                                     |
| N | Q7WGH4 | DR | UDP-N-acetylmuramate dehydrogenase activity                                                                                                                                                                             |
| N | Q7WGH4 | DR | cell division                                                                                                                                                                                                           |
| N | Q7WGH4 | DR | cellular cell wall organization                                                                                                                                                                                         |
| N | Q7WGH4 | DR | flavin adenine dinucleotide binding                                                                                                                                                                                     |
| N | Q7WGH4 | DR | oxidation-reduction process                                                                                                                                                                                             |
| N | Q7WGH4 | DR | peptidoglycan biosynthetic process                                                                                                                                                                                      |
| N | Q7WGH4 | DR | regulation of cell shape                                                                                                                                                                                                |
| N | Q7WGH9 | CC | Negative regulator of class I heat shock genes (grpe- unak-unaJ and groEL5<br>operon)                                                                                                                                   |
| N | Q7WGH9 | CC | Prevents heat-shock induction of these operons (By similarity).                                                                                                                                                         |
| N | Q7WGH9 | DE | Heat-inducible transcription repressor hrcA;                                                                                                                                                                            |
| N | Q7WGH9 | DR | regulation of transcription, DNA-dependent                                                                                                                                                                              |
| N | Q7WGH9 | DR | response to stress                                                                                                                                                                                                      |
| N | Q7WGX3 | CC | 3'-to-5' exonuclease specific for small oligoribonucleotides (By similarity).                                                                                                                                           |

|   |        |    |                                                                                                                                                                                                                                      |
|---|--------|----|--------------------------------------------------------------------------------------------------------------------------------------------------------------------------------------------------------------------------------------|
| N | Q7WGX3 | DE | Oligoribonuclease;                                                                                                                                                                                                                   |
| N | Q7WGX3 | DR | exonuclease activity                                                                                                                                                                                                                 |
| N | Q7WGX3 | DR | nucleic acid binding                                                                                                                                                                                                                 |
| N | Q7WUM8 | CC | Is involved in NO detoxification in an aerobic process, termed nitric oxide dioxygenase (NOD) reaction that utilizes O(2) and NAD(P)H to convert NO to nitrate, which protects the bacterium from various noxious nitrogen compounds |
| N | Q7WUM8 | CC | Therefore, plays a central role in the inducible response to nitrosative stress (By similarity).                                                                                                                                     |
| N | Q7WUM8 | DE | Flavo-hemoglobin;                                                                                                                                                                                                                    |
| N | Q7WUM8 | DE | Flavo-hemoprotein;                                                                                                                                                                                                                   |
| N | Q7WUM8 | DE | Hemoglobin-like protein;                                                                                                                                                                                                             |
| N | Q7WUM8 | DE | NO oxygenase;                                                                                                                                                                                                                        |
| N | Q7WUM8 | DE | Nitric oxide dioxygenase;                                                                                                                                                                                                            |
| N | Q7WUM8 | DR | nitric oxide dioxygenase activity                                                                                                                                                                                                    |
| N | Q7WUM8 | DR | oxidation-reduction process                                                                                                                                                                                                          |
| N | Q7WUM8 | DR | oxygen binding                                                                                                                                                                                                                       |
| N | Q7WUM8 | DR | oxygen transporter activity                                                                                                                                                                                                          |
| N | Q7WUM8 | DR | response to toxin                                                                                                                                                                                                                    |
| N | Q7WXC1 | CC | Part of the ABC transporter complex CcmAB involved in the biogenesis of c-type cytochromes; once thought to export heme, this seems not to be the case, but its exact role is uncertain                                              |
| N | Q7WXC1 | CC | Responsible for energy coupling to the transport system (By similarity).                                                                                                                                                             |
| N | Q7WXC1 | DE | Cytochrome c biogenesis ATP-binding export protein CcmA;                                                                                                                                                                             |
| N | Q7WXC1 | DE | Heme exporter protein A;                                                                                                                                                                                                             |
| N | Q7WXC1 | DR | cytochrome complex assembly                                                                                                                                                                                                          |
| N | Q7WXC1 | DR | heme-transporting ATPase activity                                                                                                                                                                                                    |
| N | Q7X9H9 | CC | Probable transcription factor (By similarity).                                                                                                                                                                                       |
| N | Q7X9H9 | DE | Agamous-like MADS-box protein AGL93;                                                                                                                                                                                                 |
| N | Q7X9H9 | DR | protein binding                                                                                                                                                                                                                      |
| N | Q7X9H9 | DR | regulation of transcription, DNA-dependent                                                                                                                                                                                           |
| N | Q7X9H9 | DR | sequence-specific DNA binding                                                                                                                                                                                                        |
| N | Q7X9H9 | DR | sequence-specific DNA binding transcription factor activity                                                                                                                                                                          |
| N | Q7XLY8 | CC | Possesses E3 ubiquitin-protein ligase in vitro.                                                                                                                                                                                      |
| N | Q7XLY8 | DE | E3 ubiquitin-protein ligase Os04g0590900;                                                                                                                                                                                            |
| N | Q7XLY8 | DE | RING-H2 finger protein Os04g0590900;                                                                                                                                                                                                 |
| N | Q7XLY8 | DR | ubiquitin-protein ligase activity                                                                                                                                                                                                    |
| N | Q7XLY8 | DR | zinc ion binding                                                                                                                                                                                                                     |
| N | Q7Y201 | CC | Acts in the modification of cell walls via demethylesterification of cell wall pectin (By similarity).                                                                                                                               |
| N | Q7Y201 | DE | Pectin methylesterase 13;                                                                                                                                                                                                            |
| N | Q7Y201 | DE | Pectin methylesterase inhibitor 13;                                                                                                                                                                                                  |
| N | Q7Y201 | DE | Pectinesterase 13;                                                                                                                                                                                                                   |
| N | Q7Y201 | DE | Pectinesterase inhibitor 13;                                                                                                                                                                                                         |
| N | Q7Y201 | DE | Probable pectinesterase/pectinesterase inhibitor 13;                                                                                                                                                                                 |
| N | Q7Y201 | DR | aspartyl esterase activity                                                                                                                                                                                                           |
| N | Q7Y201 | DR | cell wall modification                                                                                                                                                                                                               |
| N | Q7Y201 | DR | enzyme inhibitor activity                                                                                                                                                                                                            |
| N | Q7Y201 | DR | pectinesterase activity                                                                                                                                                                                                              |
| N | Q7YJV7 | CC | Component of the cytochrome b6-f complex, which mediates electron transfer between photosystem II (PSII) and photosystem I (PSI), cyclic electron flow around PSI, and state transitions                                             |
| N | Q7YJV7 | CC | PetL is important for photoautotrophic growth as well as for electron transfer efficiency and stability of the cytochrome b6-f complex (By similarity).                                                                              |
| N | Q7YJV7 | DE | Cytochrome b6-f complex subunit 6;                                                                                                                                                                                                   |
| N | Q7YJV7 | DE | Cytochrome b6-f complex subunit VI;                                                                                                                                                                                                  |
| N | Q7YJV7 | DE | Cytochrome b6-f complex subunit petL;                                                                                                                                                                                                |
| N | Q7YJV7 | DR | electron carrier activity                                                                                                                                                                                                            |
| N | Q7YJV7 | DR | electron transport chain                                                                                                                                                                                                             |
| N | Q7YJV7 | DR | photosynthesis                                                                                                                                                                                                                       |
| N | Q7YJW0 | CC | Component of the cytochrome b6-f complex, which mediates electron transfer between photosystem II (PSII) and photosystem I (PSI), cyclic electron flow around PSI, and state transitions (By similarity).                            |
| N | Q7YJW0 | DE | Apocytochrome f;                                                                                                                                                                                                                     |
| N | Q7YJW0 | DR | electron carrier activity                                                                                                                                                                                                            |
| N | Q7YJW0 | DR | electron transport chain                                                                                                                                                                                                             |

|   |        |    |                                                                                                                                                                                                                 |
|---|--------|----|-----------------------------------------------------------------------------------------------------------------------------------------------------------------------------------------------------------------|
| N | Q7YJW0 | DR | photosynthesis                                                                                                                                                                                                  |
| N | Q7YJY8 | CC | This is one of the two reaction center proteins of photosystem II (By similarity).                                                                                                                              |
| N | Q7YJY8 | DE | 32 kDa thylakoid membrane protein;                                                                                                                                                                              |
| N | Q7YJY8 | DE | Photosystem II protein D1;                                                                                                                                                                                      |
| N | Q7YJY8 | DE | Photosystem Q(B) protein;                                                                                                                                                                                       |
| N | Q7YJY8 | DR | electron transporter, transferring electrons within the cyclic electron transport pathway of photosynthesis activity                                                                                            |
| N | Q7YJY8 | DR | metal ion binding                                                                                                                                                                                               |
| N | Q7YJY8 | DR | photosynthetic electron transport in photosystem II                                                                                                                                                             |
| N | Q7YJY8 | DR | response to herbicide                                                                                                                                                                                           |
| N | Q7YRH1 | DE | Ribonuclease-like protein 9;                                                                                                                                                                                    |
| N | Q7YRH1 | DR | nucleic acid binding                                                                                                                                                                                            |
| N | Q7YRH1 | DR | pancreatic ribonuclease activity                                                                                                                                                                                |
| N | Q7YZT6 | CC | Catalyzes the production of trehalose from glucose-6- phosphate and UDP-glucose in a 2 step process.                                                                                                            |
| N | Q7YZT6 | DE | Alpha,alpha-trehalose-phosphate synthase [UDP-forming] 1;                                                                                                                                                       |
| N | Q7YZT6 | DE | Trehalose-6-phosphate synthase 1;                                                                                                                                                                               |
| N | Q7YZT6 | DE | UDP-glucose-glucosephosphate glucosyltransferase 1;                                                                                                                                                             |
| N | Q7YZT6 | DR | alpha,alpha-trehalose-phosphate synthase (UDP-forming) activity                                                                                                                                                 |
| N | Q7YZT6 | DR | determination of adult lifespan                                                                                                                                                                                 |
| N | Q7YZT6 | DR | trehalose biosynthetic process                                                                                                                                                                                  |
| N | Q7Z6G3 | DE | EF-hand calcium-binding protein 2;                                                                                                                                                                              |
| N | Q7Z6G3 | DE | N-terminal EF-hand calcium-binding protein 2;                                                                                                                                                                   |
| N | Q7Z6G3 | DE | Neuronal calcium-binding protein 2;                                                                                                                                                                             |
| N | Q7Z6G3 | DE | Synaptotagmin-interacting protein 2;                                                                                                                                                                            |
| N | Q7Z6G3 | DR | antibiotic biosynthetic process                                                                                                                                                                                 |
| N | Q7Z6G3 | DR | calcium ion binding                                                                                                                                                                                             |
| N | Q7Z6G3 | DR | oxidoreductase activity                                                                                                                                                                                         |
| N | Q7Z6G3 | DR | protein binding                                                                                                                                                                                                 |
| N | Q7ZV50 | DE | Magnesium transporter protein 1;                                                                                                                                                                                |
| N | Q7ZV50 | DR | cell redox homeostasis                                                                                                                                                                                          |
| N | Q7ZV50 | DR | magnesium ion transport                                                                                                                                                                                         |
| N | Q7ZWG6 | CC | Has been shown to act both as an intestinal proton- coupled high-affinity folate transporter and as an intestinal heme transporter which mediates heme uptake from the gut lumen into duodenal epithelial cells |
| N | Q7ZWG6 | CC | Shows a higher affinity for folate than heme (By similarity).                                                                                                                                                   |
| N | Q7ZWG6 | DE | Heme carrier protein 1;                                                                                                                                                                                         |
| N | Q7ZWG6 | DE | Proton-coupled folate transporter;                                                                                                                                                                              |
| N | Q7ZWG6 | DE | Solute carrier family 46 member 1;                                                                                                                                                                              |
| N | Q7ZWG6 | DR | folic acid binding                                                                                                                                                                                              |
| N | Q7ZWG6 | DR | transmembrane transport                                                                                                                                                                                         |
| N | Q7ZWU7 | CC | May play a role as calcium-regulated intrinsic membrane protein (By similarity).                                                                                                                                |
| N | Q7ZWU7 | DE | Extended synaptotagmin-2-B;                                                                                                                                                                                     |
| N | Q7ZXV5 | CC | Protein-lysine N-methyltransferase that methylates both histones and non-histone proteins                                                                                                                       |
| N | Q7ZXV5 | CC | Has also methyltransferase activity toward non-histone proteins such as p53/TP53 and RB1 (By similarity).                                                                                                       |
| N | Q7ZXV5 | CC | Specifically methylates histone H3 'Lys-4' (H3K4me) and dimethylates histone H3 'Lys-36' (H3K36me2)                                                                                                             |
| N | Q7ZXV5 | DE | Histone methyltransferase SMYD2-A;                                                                                                                                                                              |
| N | Q7ZXV5 | DE | N-lysine methyltransferase SMYD2-A;                                                                                                                                                                             |
| N | Q7ZXV5 | DE | SET and MYND domain-containing protein 2A;                                                                                                                                                                      |
| N | Q7ZXV5 | DR | RNA polymerase II core binding                                                                                                                                                                                  |
| N | Q7ZXV5 | DR | histone methyltransferase activity (H3-K36 specific)                                                                                                                                                            |
| N | Q7ZXV5 | DR | negative regulation of cell proliferation                                                                                                                                                                       |
| N | Q7ZXV5 | DR | negative regulation of gene-specific transcription from RNA polymerase II promoter                                                                                                                              |
| N | Q7ZXV5 | DR | peptidyl-lysine dimethylation                                                                                                                                                                                   |
| N | Q7ZXV5 | DR | peptidyl-lysine monomethylation                                                                                                                                                                                 |
| N | Q7ZXV5 | DR | regulation of DNA damage response, signal transduction by p53 class mediator                                                                                                                                    |
| N | Q7ZXV5 | DR | zinc ion binding                                                                                                                                                                                                |
| N | Q7ZY11 | CC | functions in the early steps of protein synthesis of a small number of specific mRNAs                                                                                                                           |
| N | Q7ZY11 | CC | Acts by directing the binding of methionyl-tRNAi to 40S ribosomal subunits                                                                                                                                      |
| N | Q7ZY11 | CC | In contrast to the eIF- 2 complex, it binds methionyl-tRNAi to 40 S subunits in a codon- dependent manner, whereas the eIF-2 complex binds methionyl-tRNAi to 40 S subunits in a GTP-dependent manner           |

|   |        |    |                                                                                                                                                                                                                 |
|---|--------|----|-----------------------------------------------------------------------------------------------------------------------------------------------------------------------------------------------------------------|
| N | Q7ZY11 | CC | May act by impinging the expression of specific proteins (By similarity).                                                                                                                                       |
| N | Q7ZY11 | DE | Eukaryotic translation initiation factor 2A;                                                                                                                                                                    |
| N | Q7ZY11 | DR | regulation of translation                                                                                                                                                                                       |
| N | Q7ZY11 | DR | translation initiation factor activity                                                                                                                                                                          |
| N | Q803A7 | CC | Converts O-phosphoseryl-tRNA(Sec) to selenocysteinyl- tRNA(Sec) required for selenoprotein biosynthesis (By similarity).                                                                                        |
| N | Q803A7 | DE | O-phosphoseryl-tRNA(Sec) selenium transferase;                                                                                                                                                                  |
| N | Q803A7 | DE | Sec synthase;                                                                                                                                                                                                   |
| N | Q803A7 | DE | Selenocysteine synthase;                                                                                                                                                                                        |
| N | Q803A7 | DE | Selenocysteinyl-tRNA(Sec) synthase;                                                                                                                                                                             |
| N | Q803A7 | DE | Sep-tRNA:Sec-tRNA synthase;                                                                                                                                                                                     |
| N | Q803A7 | DE | Soluble liver antigen/liver pancreas antigen-like;                                                                                                                                                              |
| N | Q803A7 | DE | UGA suppressor tRNA-associated protein homolog;                                                                                                                                                                 |
| N | Q803A7 | DR | pyridoxal phosphate binding                                                                                                                                                                                     |
| N | Q803A7 | DR | transferase activity, transferring selenium-containing groups                                                                                                                                                   |
| N | Q803Q4 | DE | DEP domain-containing protein 1A;                                                                                                                                                                               |
| N | Q803Q4 | DR | GTPase activator activity                                                                                                                                                                                       |
| N | Q803Q4 | DR | intracellular signal transduction                                                                                                                                                                               |
| N | Q80WG5 | CC | Involved in B-cell development                                                                                                                                                                                  |
| N | Q80WG5 | CC | Required for the pro-B cell to pre-B cell transition.                                                                                                                                                           |
| N | Q80WG5 | DE | Leucine-rich repeat-containing protein 8A;                                                                                                                                                                      |
| N | Q80WG5 | DR | pre-B cell differentiation                                                                                                                                                                                      |
| N | Q80XN0 | DE | 3-hydroxybutyrate dehydrogenase;                                                                                                                                                                                |
| N | Q80XN0 | DE | D-beta-hydroxybutyrate dehydrogenase, mitochondrial;                                                                                                                                                            |
| N | Q80XN0 | DR | 3-hydroxybutyrate dehydrogenase activity                                                                                                                                                                        |
| N | Q80XN0 | DR | oxidation-reduction process                                                                                                                                                                                     |
| N | Q80XU8 | CC | Promotes neurite outgrowth in hippocampal neurons                                                                                                                                                               |
| N | Q80XU8 | CC | May play a role in redistributing DLG4 to the cell periphery.                                                                                                                                                   |
| N | Q80XU8 | DE | Leucine-rich repeat and fibronectin type-III domain-containing protein 4;                                                                                                                                       |
| N | Q80YS6 | CC | Can cross-link actin filaments into both network and bundle structures                                                                                                                                          |
| N | Q80YS6 | CC | May function as an adapter molecule that links other proteins, such as SRC and PKC to the actin cytoskeleton (By similarity).                                                                                   |
| N | Q80YS6 | CC | may modulate changes in actin filament integrity and induce lamellipodia formation                                                                                                                              |
| N | Q80YS6 | DE | 110 kDa actin filament-associated protein;                                                                                                                                                                      |
| N | Q80YS6 | DE | Actin filament-associated protein 1;                                                                                                                                                                            |
| N | Q80YS6 | DR | SH3 domain binding                                                                                                                                                                                              |
| N | Q80YS6 | DR | actin binding                                                                                                                                                                                                   |
| N | Q814F6 | CC | Exhibits a very high intrinsic GTPase hydrolysis rate                                                                                                                                                           |
| N | Q814F6 | CC | involved in the addition of a carboxymethylaminomethyl (cmnm) group at the wobble position (U34) of certain tRNAs, forming tRNA- cmnm(5)s(2)U34 (By similarity)                                                 |
| N | Q814F6 | DE | tRNA modification GTPase mnmE;                                                                                                                                                                                  |
| N | Q814F6 | DR | GTPase activity                                                                                                                                                                                                 |
| N | Q814F6 | DR | metal ion binding                                                                                                                                                                                               |
| N | Q814F6 | DR | tRNA modification                                                                                                                                                                                               |
| N | Q814F6 | DR | Catalyzes the production of spermidine from putrescine and decarboxylated S-adenosylmethionine (dcSAM), which serves as an aminopropyl donor (By similarity)                                                    |
| N | Q814Q1 | CC | Putrescine aminopropyltransferase 1;                                                                                                                                                                            |
| N | Q814Q1 | DE | Spermidine synthase 1;                                                                                                                                                                                          |
| N | Q814Q1 | DR | spermidine biosynthetic process                                                                                                                                                                                 |
| N | Q814Q1 | DR | spermidine synthase activity                                                                                                                                                                                    |
| N | Q81835 | CC | Promotes both transcription and replication of genomic RNA                                                                                                                                                      |
| N | Q81835 | CC | Following virus entry into host cell, provides nuclear import of HDV RNPs thanks to its nuclear localization signal                                                                                             |
| N | Q81835 | CC | May interact with host RNA polymerase II thereby changing its template requirement from DNA to RNA                                                                                                              |
| N | Q81835 | CC | RNA pol II complex would then acts as a RNA-directed RNA polymerase, and transcribe and replicate HDV genome (By similarity).                                                                                   |
| N | Q81835 | DE | Small delta antigen;                                                                                                                                                                                            |
| N | Q81835 | DR | interspecies interaction between organisms                                                                                                                                                                      |
| N | Q818F0 | CC | Participates actively in the response to hyperosmotic and heat shock by preventing the aggregation of stress-denatured proteins and by disaggregating proteins, also in an autonomous, dnaK-independent fashion |
| N | Q818F0 | CC | Also involved, together with dnaK and grpE, in the DNA replication of plasmids through activation of initiation proteins (By similarity).                                                                       |



|   |        |    |                                                                                                                                                                       |
|---|--------|----|-----------------------------------------------------------------------------------------------------------------------------------------------------------------------|
| N | Q818F0 | CC | GrpE releases ADP from dnaK; ATP binding to dnaK triggers the release of the substrate protein, thus completing the reaction cycle                                    |
| N | Q818F0 | CC | Several rounds of ATP-dependent interactions between dnaJ, dnaK and grpE are required for fully efficient folding                                                     |
| N | Q818F0 | CC | Unfolded proteins bind initially to dnaJ; upon interaction with the dnaJ-bound protein, dnaK hydrolyzes its bound ATP, resulting in the formation of a stable complex |
| N | Q818F0 | DE | Chaperone protein dnaJ;                                                                                                                                               |
| N | Q818F0 | DR | DNA replication                                                                                                                                                       |
| N | Q818F0 | DR | heat shock protein binding                                                                                                                                            |
| N | Q818F0 | DR | metal ion binding                                                                                                                                                     |
| N | Q818F0 | DR | protein folding                                                                                                                                                       |
| N | Q818F0 | DR | response to heat                                                                                                                                                      |
| N | Q818F0 | DR | unfolded protein binding                                                                                                                                              |
| N | Q818W3 | DE | Ornithine carbamoyltransferase;                                                                                                                                       |
| N | Q818W3 | DR | amino acid binding                                                                                                                                                    |
| N | Q818W3 | DR | arginine biosynthetic process                                                                                                                                         |
| N | Q818W3 | DR | ornithine carbamoyltransferase activity                                                                                                                               |
| N | Q819E7 | CC | Dephosphorylates 2-hydroxy-3-keto-5-methylthiopentenyl-1-phosphate (HK-MTPenyl-1-P) yielding 1,2-dihydroxy-3-keto-5-methylthiopentene (DHK-MTPenyl) (By similarity)   |
| N | Q819E7 | DE | 2-hydroxy-3-keto-5-methylthiopentenyl-1-phosphate phosphatase;                                                                                                        |
| N | Q819E7 | DE | HK-MTPenyl-1-P phosphatase;                                                                                                                                           |
| N | Q819E7 | DR | L-methionine salvage                                                                                                                                                  |
| N | Q819E7 | DR | phosphatase activity                                                                                                                                                  |
| N | Q819V8 | CC | Digests double-stranded RNA                                                                                                                                           |
| N | Q819V8 | CC | Involved in the processing of ribosomal RNA precursors and of some mRNAs (By similarity).                                                                             |
| N | Q819V8 | DE | Ribonuclease 3;                                                                                                                                                       |
| N | Q819V8 | DE | Ribonuclease III;                                                                                                                                                     |
| N | Q819V8 | DR | RNA processing                                                                                                                                                        |
| N | Q819V8 | DR | double-stranded RNA binding                                                                                                                                           |
| N | Q819V8 | DR | rRNA catabolic process                                                                                                                                                |
| N | Q819V8 | DR | ribonuclease III activity                                                                                                                                             |
| N | Q81G41 | CC | Involved in the biosynthesis of D-alanyl-lipoteichoic acid (LTA)                                                                                                      |
| N | Q81G41 | CC | Activated D-alanyl-Dcp donates its D-alanyl substituent to membrane-associated LTA (By similarity).                                                                   |
| N | Q81G41 | DE | D-alanine--poly(phosphoribitol) ligase subunit 2;                                                                                                                     |
| N | Q81G41 | DE | D-alanyl carrier protein;                                                                                                                                             |
| N | Q81G41 | DR | D-alanine-poly(phosphoribitol) ligase activity                                                                                                                        |
| N | Q81G41 | DR | acyl carrier activity                                                                                                                                                 |
| N | Q81G41 | DR | cellular cell wall organization                                                                                                                                       |
| N | Q81G41 | DR | cofactor binding                                                                                                                                                      |
| N | Q81G41 | DR | teichoic acid biosynthetic process                                                                                                                                    |
| N | Q81JY5 | CC | Catalyzes the conversion of uracil and 5-phospho-alpha-D-ribose 1-diphosphate (PRPP) to UMP and diphosphate (By similarity).                                          |
| N | Q81JY5 | DE | UMP pyrophosphorylase;                                                                                                                                                |
| N | Q81JY5 | DE | Uracil phosphoribosyltransferase;                                                                                                                                     |
| N | Q81JY5 | DR | nucleoside metabolic process                                                                                                                                          |
| N | Q81JY5 | DR | uracil phosphoribosyltransferase activity                                                                                                                             |
| N | Q81JY5 | DR | uracil salvage                                                                                                                                                        |
| N | Q81LC2 | CC | Necessary for normal cell division and for the maintenance of normal septation (By similarity).                                                                       |
| N | Q81LC2 | DE | Probable GTP-binding protein EngB;                                                                                                                                    |
| N | Q81LC2 | DR | barrier septum formation                                                                                                                                              |
| N | Q81LT9 | CC | Involved in DNA repair and recF pathway recombination (By similarity).                                                                                                |
| N | Q81LT9 | DE | DNA repair protein recO;                                                                                                                                              |
| N | Q81LT9 | DE | Recombination protein O;                                                                                                                                              |
| N | Q81LT9 | DR | ARF GTPase activator activity                                                                                                                                         |
| N | Q81LT9 | DR | DNA recombination                                                                                                                                                     |
| N | Q81LT9 | DR | regulation of ARF GTPase activity                                                                                                                                     |
| N | Q81LT9 | DR | zinc ion binding                                                                                                                                                      |
| N | Q81PP9 | CC | Catalyzes the hydrolysis of N-formyl-L-kynurenine to L-kynurenine (By similarity)                                                                                     |
| N | Q81PP9 | DE | Kynurenine formamidase;                                                                                                                                               |
| N | Q81PP9 | DE | N-formylkynurenine formamidase;                                                                                                                                       |
| N | Q81PP9 | DR | anthranilate metabolic process                                                                                                                                        |
| N | Q81PP9 | DR | arylformamidase activity                                                                                                                                              |

|   |        |    |                                                                                                                                                                                                                 |
|---|--------|----|-----------------------------------------------------------------------------------------------------------------------------------------------------------------------------------------------------------------|
| N | Q81PP9 | DR | formamidase activity                                                                                                                                                                                            |
| N | Q81PP9 | DR | tryptophan catabolic process to kynurenine                                                                                                                                                                      |
| N | Q81V80 | CC | Catalyzes the decarboxylative condensation of pimeloyl- CoA and L-alanine to produce 8-amino-7-oxononanoate (AON), coenzyme A and/or converts 2-amino-3-ketobutyrate to glycine and acetyl-CoA (By similarity). |
| N | Q81V80 | DE | 7-KAP synthase 1;                                                                                                                                                                                               |
| N | Q81V80 | DE | 7-keto-8-amino-pelargonic acid synthase 1;                                                                                                                                                                      |
| N | Q81V80 | DE | 8-amino-7-ketopelargonate synthase 1;                                                                                                                                                                           |
| N | Q81V80 | DE | AONS/AKB ligase 1;                                                                                                                                                                                              |
| N | Q81V80 | DE | Alpha-oxoamine synthase 1;                                                                                                                                                                                      |
| N | Q81V80 | DE | KAPA synthase 1;                                                                                                                                                                                                |
| N | Q81V80 | DE | L-alanine--pimeloyl-CoA ligase 1;                                                                                                                                                                               |
| N | Q81V80 | DE | putative 8-amino-7-oxononanoate synthase/2-amino-3-ketobutyrate coenzyme A ligase 1;                                                                                                                            |
| N | Q81V80 | DR | 8-amino-7-oxononanoate synthase activity                                                                                                                                                                        |
| N | Q81V80 | DR | biosynthetic process                                                                                                                                                                                            |
| N | Q81V80 | DR | glycine C-acetyltransferase activity                                                                                                                                                                            |
| N | Q81V80 | DR | pyridoxal phosphate binding                                                                                                                                                                                     |
| N | Q81V80 | DR | transferase activity, transferring nitrogenous groups                                                                                                                                                           |
| N | Q81VT4 | CC | One of the primary rRNA binding proteins, it binds directly to 16S rRNA where it nucleates assembly of the head domain of the 30S subunit                                                                       |
| N | Q81VT4 | CC | Is located at the subunit interface close to the decoding center, probably blocks exit of the E-site tRNA (By similarity).                                                                                      |
| N | Q81VT4 | DE | 30S ribosomal protein S7;                                                                                                                                                                                       |
| N | Q81VT4 | DR | structural constituent of ribosome                                                                                                                                                                              |
| N | Q81WH2 | CC | modifies the free amino group of the aminoacyl moiety of methionyl-tRNA (Met-tRNA)                                                                                                                              |
| N | Q81WH2 | CC | The formyl group appears to play a dual role in the initiator identity of N-formylmethionyl-tRNA by: (I) promoting its recognition by IF2 and (II) impairing its binding to EFTu-GTP (By similarity).           |
| N | Q81WH2 | DE | Methionyl-tRNA formyltransferase;                                                                                                                                                                               |
| N | Q81WH2 | DR | methionyl-tRNA formyltransferase activity                                                                                                                                                                       |
| N | Q81WH2 | DR | methyltransferase activity                                                                                                                                                                                      |
| N | Q81XB6 | DE | Protein psiE homolog;                                                                                                                                                                                           |
| N | Q81XB6 | DR | cellular response to phosphate starvation                                                                                                                                                                       |
| N | Q81YW4 | CC | Modulates recA activity (By similarity).                                                                                                                                                                        |
| N | Q81YW4 | DE | Regulatory protein recX;                                                                                                                                                                                        |
| N | Q81YW4 | DR | regulation of DNA repair                                                                                                                                                                                        |
| N | Q81ZF8 | DE | 1-pyrroline-5-carboxylate dehydrogenase;                                                                                                                                                                        |
| N | Q81ZF8 | DE | P5C dehydrogenase;                                                                                                                                                                                              |
| N | Q81ZF8 | DR | 1-pyrroline-5-carboxylate dehydrogenase activity                                                                                                                                                                |
| N | Q81ZF8 | DR | oxidation-reduction process                                                                                                                                                                                     |
| N | Q81ZF8 | DR | proline biosynthetic process                                                                                                                                                                                    |
| N | Q820S3 | CC | The ruvA-ruvB complex in the presence of ATP renatures cruciform structure in supercoiled DNA with palindromic sequence, indicating that it may promote strand exchange reactions in homologous recombination   |
| N | Q820S3 | CC | RuvA stimulates, in the presence of DNA, the weak ATPase activity of ruvB (By similarity).                                                                                                                      |
| N | Q820S3 | CC | RuvAB is an helicase that mediates the Holliday junction migration by localized denaturation and reannealing                                                                                                    |
| N | Q820S3 | DE | Holliday junction ATP-dependent DNA helicase ruvA;                                                                                                                                                              |
| N | Q820S3 | DR | DNA recombination                                                                                                                                                                                               |
| N | Q820S3 | DR | four-way junction helicase activity                                                                                                                                                                             |
| N | Q824N5 | CC | with S4 and S12 plays an important role in translational accuracy (By similarity)                                                                                                                               |
| N | Q824N5 | DE | 30S ribosomal protein S5;                                                                                                                                                                                       |
| N | Q824N5 | DR | structural constituent of ribosome                                                                                                                                                                              |
| N | Q827G1 | CC | Key enzyme in the regulation of glycerol uptake and metabolism.                                                                                                                                                 |
| N | Q827G1 | DE | ATP:glycerol 3-phosphotransferase 2;                                                                                                                                                                            |
| N | Q827G1 | DE | Glycerokinase 2;                                                                                                                                                                                                |
| N | Q827G1 | DE | Glycerol kinase 2;                                                                                                                                                                                              |
| N | Q827G1 | DR | glycerol kinase activity                                                                                                                                                                                        |
| N | Q827G1 | DR | glycerol-3-phosphate metabolic process                                                                                                                                                                          |
| N | Q82AP6 | CC | Catalyzes the transfer of endogenously produced octanoic acid from octanoyl-acyl-carrier-protein onto the lipoyl domains of lipoate-dependent enzymes                                                           |
| N | Q82AP6 | CC | Lipoyl-ACP can also act as a substrate although octanoyl-ACP is likely to be the physiological substrate (By similarity).                                                                                       |
| N | Q82AP6 | DE | Lipoate-protein ligase B;                                                                                                                                                                                       |

|   |        |    |                                                                                                                                                                               |
|---|--------|----|-------------------------------------------------------------------------------------------------------------------------------------------------------------------------------|
| N | Q82AP6 | DE | Lipoyl/octanoyl transferase;                                                                                                                                                  |
| N | Q82AP6 | DE | Octanoyl-[acyl-carrier-protein]-protein N-octanoyltransferase;                                                                                                                |
| N | Q82AP6 | DE | Octanoyltransferase;                                                                                                                                                          |
| N | Q82AP6 | DR | lipoate biosynthetic process                                                                                                                                                  |
| N | Q82AP6 | DR | lipoyl(octanoyl) transferase activity                                                                                                                                         |
| N | Q82AP6 | DR | octanoyltransferase activity                                                                                                                                                  |
| N | Q82AP6 | DR | protein modification process                                                                                                                                                  |
| N | Q82AY2 | DE | Uncharacterized lipoprotein SAV_5923;                                                                                                                                         |
| N | Q82FW3 | DE | FGAM synthase I;                                                                                                                                                              |
| N | Q82FW3 | DE | Phosphoribosylformylglycinamide synthase 1;                                                                                                                                   |
| N | Q82FW3 | DE | Phosphoribosylformylglycinamide synthase I;                                                                                                                                   |
| N | Q82FW3 | DR | 'de novo' IMP biosynthetic process                                                                                                                                            |
| N | Q82FW3 | DR | cobalamin biosynthetic process                                                                                                                                                |
| N | Q82FW3 | DR | glutamine metabolic process                                                                                                                                                   |
| N | Q82FW3 | DR | phosphoribosylformylglycinamide synthase activity                                                                                                                             |
| N | Q82M40 | CC | Catalyzes the transfer of the CoA moiety from formyl-CoA to oxalate (By similarity)                                                                                           |
| N | Q82M40 | DE | Formyl-CoA transferase;                                                                                                                                                       |
| N | Q82M40 | DE | Formyl-coenzyme A transferase;                                                                                                                                                |
| N | Q82M40 | DR | formyl-CoA transferase activity                                                                                                                                               |
| N | Q82ML4 | CC | Catalyzes the acyloin condensation reaction between C atoms 2 and 3 of pyruvate and glyceraldehyde 3-phosphate to yield 1-deoxy-D-xylulose-5-phosphate (DXP) (By similarity). |
| N | Q82ML4 | DE | 1-deoxy-D-xylulose-5-phosphate synthase 1;                                                                                                                                    |
| N | Q82ML4 | DE | 1-deoxyxylulose-5-phosphate synthase 1;                                                                                                                                       |
| N | Q82ML4 | DE | DXP synthase 1;                                                                                                                                                               |
| N | Q82ML4 | DR | 1-deoxy-D-xylulose-5-phosphate synthase activity                                                                                                                              |
| N | Q82ML4 | DR | oxidoreductase activity, acting on the aldehyde or oxo group of donors, disulfide as acceptor                                                                                 |
| N | Q82ML4 | DR | terpenoid biosynthetic process                                                                                                                                                |
| N | Q82ML4 | DR | thiamine biosynthetic process                                                                                                                                                 |
| N | Q82NZ4 | CC | Cleaves peptides in various proteins in a process that requires ATP hydrolysis                                                                                                |
| N | Q82NZ4 | CC | Has a chymotrypsin-like activity                                                                                                                                              |
| N | Q82NZ4 | CC | Plays a major role in the degradation of misfolded proteins (By similarity).                                                                                                  |
| N | Q82NZ4 | DE | ATP-dependent Clp protease proteolytic subunit 1;                                                                                                                             |
| N | Q82NZ4 | DE | Endopeptidase Clp 1;                                                                                                                                                          |
| N | Q82NZ4 | DR | serine-type endopeptidase activity                                                                                                                                            |
| N | Q82VV9 | CC | Nucleotidase that shows phosphatase activity on nucleoside 5'-monophosphates (By similarity).                                                                                 |
| N | Q82VV9 | DE | 5'-nucleotidase surE;                                                                                                                                                         |
| N | Q82VV9 | DE | Nucleoside 5'-monophosphate phosphohydrolase;                                                                                                                                 |
| N | Q82VV9 | DR | 5'-nucleotidase activity                                                                                                                                                      |
| N | Q82VV9 | DR | metal ion binding                                                                                                                                                             |
| N | Q82VV9 | DR | nucleotide binding                                                                                                                                                            |
| N | Q831A5 | CC | Produces ATP from ADP in the presence of a proton gradient across the membrane                                                                                                |
| N | Q831A5 | CC | The catalytic sites are hosted primarily by the beta subunits (By similarity).                                                                                                |
| N | Q831A5 | DE | ATP synthase F1 sector subunit beta;                                                                                                                                          |
| N | Q831A5 | DE | ATP synthase subunit beta;                                                                                                                                                    |
| N | Q831A5 | DE | F-ATPase subunit beta;                                                                                                                                                        |
| N | Q831A5 | DR | ATP hydrolysis coupled proton transport                                                                                                                                       |
| N | Q831A5 | DR | ATP synthesis coupled proton transport                                                                                                                                        |
| N | Q831A5 | DR | hydrogen ion transporting ATP synthase activity, rotational mechanism                                                                                                         |
| N | Q831A5 | DR | hydrogen-exporting ATPase activity, phosphorylative mechanism                                                                                                                 |
| N | Q831A5 | DR | proton-transporting ATPase activity, rotational mechanism                                                                                                                     |
| N | Q831F5 | DE | Thymidine kinase;                                                                                                                                                             |
| N | Q831F5 | DR | DNA replication                                                                                                                                                               |
| N | Q831F5 | DR | metal ion binding                                                                                                                                                             |
| N | Q831F5 | DR | thymidine kinase activity                                                                                                                                                     |
| N | Q83262 | CC | RNA-dependent RNA polymerase which replicates the viral genome composed of 3 RNA segments, RNA1, RNA2 and RNA3 (Potential).                                                   |
| N | Q83262 | DE | RNA-directed RNA polymerase 2a;                                                                                                                                               |
| N | Q83262 | DE | protein 2a;                                                                                                                                                                   |
| N | Q83262 | DR | RNA-directed RNA polymerase activity                                                                                                                                          |
| N | Q83262 | DR | nucleotide binding                                                                                                                                                            |
| N | Q83262 | DR | viral genome replication                                                                                                                                                      |
| N | Q834G2 | CC | Zinc phosphodiesterase, which displays some RNA 5'-processing endonuclease activity.                                                                                          |

|   |        |    |                                                                                                                                                                                                               |
|---|--------|----|---------------------------------------------------------------------------------------------------------------------------------------------------------------------------------------------------------------|
| N | Q834G2 | CC | Probably involved in tRNA maturation, by removing a 3'-trailer from precursor tRNA (By similarity).                                                                                                           |
| N | Q834G2 | DE | Ribonuclease Z;                                                                                                                                                                                               |
| N | Q834G2 | DE | tRNA 3' endonuclease;                                                                                                                                                                                         |
| N | Q834G2 | DR | endoribonuclease activity, producing 5'-phosphomonoesters                                                                                                                                                     |
| N | Q834G2 | DR | metal ion binding                                                                                                                                                                                             |
| N | Q834G2 | DR | tRNA 3'-trailer cleavage                                                                                                                                                                                      |
| N | Q835X3 | DE | UPF0756 membrane protein EF_1246;                                                                                                                                                                             |
| N | Q839E3 | CC | Catalyzes the reversible transfer of the terminal phosphate group between ATP and AMP                                                                                                                         |
| N | Q839E3 | CC | This small ubiquitous enzyme involved in the energy metabolism and nucleotide synthesis, is essential for maintenance and cell growth (By similarity).                                                        |
| N | Q839E3 | DE | ATP-AMP transphosphorylase;                                                                                                                                                                                   |
| N | Q839E3 | DE | Adenylate kinase;                                                                                                                                                                                             |
| N | Q839E3 | DR | adenylate kinase activity                                                                                                                                                                                     |
| N | Q83BE2 | CC | The ruvA-ruvB complex in the presence of ATP renatures cruciform structure in supercoiled DNA with palindromic sequence, indicating that it may promote strand exchange reactions in homologous recombination |
| N | Q83BE2 | CC | RuvA stimulates, in the presence of DNA, the weak ATPase activity of ruvB (By similarity).                                                                                                                    |
| N | Q83BE2 | CC | RuvAB is an helicase that mediates the Holliday junction migration by localized denaturation and reannealing                                                                                                  |
| N | Q83BE2 | DE | Holliday junction ATP-dependent DNA helicase ruvA;                                                                                                                                                            |
| N | Q83BE2 | DR | DNA recombination                                                                                                                                                                                             |
| N | Q83BE2 | DR | four-way junction helicase activity                                                                                                                                                                           |
| N | Q83BM9 | CC | Furnishes a means for formation of correctly charged Gln-tRNA(Gln) through the transamidation of misacylated Glu- tRNA(Gln) in organisms which lack glutaminyl-tRNA synthetase                                |
| N | Q83BM9 | CC | The reaction takes place in the presence of glutamine and ATP through an activated gamma-phospho-Glu-tRNA(Gln) (By similarity).                                                                               |
| N | Q83BM9 | DE | Glu-ADT subunit A;                                                                                                                                                                                            |
| N | Q83BM9 | DE | Glutamyl-tRNA(Gln) amidotransferase subunit A;                                                                                                                                                                |
| N | Q83BM9 | DR | carbon-nitrogen ligase activity, with glutamine as amido-N-donor                                                                                                                                              |
| N | Q83G46 | CC | Catalyzes the acyloin condensation reaction between C atoms 2 and 3 of pyruvate and glyceraldehyde 3-phosphate to yield 1-deoxy-D-xylulose-5-phosphate (DXP) (By similarity).                                 |
| N | Q83G46 | DE | 1-deoxy-D-xylulose-5-phosphate synthase;                                                                                                                                                                      |
| N | Q83G46 | DE | 1-deoxyxylulose-5-phosphate synthase;                                                                                                                                                                         |
| N | Q83G46 | DE | DXP synthase;                                                                                                                                                                                                 |
| N | Q83G46 | DR | 1-deoxy-D-xylulose-5-phosphate synthase activity                                                                                                                                                              |
| N | Q83G46 | DR | terpenoid biosynthetic process                                                                                                                                                                                |
| N | Q83G46 | DR | thiamine biosynthetic process                                                                                                                                                                                 |
| N | Q83HK9 | CC | Endonuclease that specifically degrades the RNA of RNA- DNA hybrids (By similarity).                                                                                                                          |
| N | Q83HK9 | DE | Ribonuclease H;                                                                                                                                                                                               |
| N | Q83HK9 | DR | metal ion binding                                                                                                                                                                                             |
| N | Q83HK9 | DR | nucleic acid binding                                                                                                                                                                                          |
| N | Q83HK9 | DR | ribonuclease H activity                                                                                                                                                                                       |
| N | Q83HW9 | CC | 3'-to-5' exoribonuclease specific for small oligoribonucleotides (By similarity).                                                                                                                             |
| N | Q83HW9 | DE | Oligoribonuclease;                                                                                                                                                                                            |
| N | Q83HW9 | DR | exonuclease activity                                                                                                                                                                                          |
| N | Q83HW9 | DR | nucleic acid binding                                                                                                                                                                                          |
| N | Q83JD1 | CC | Required for the formation of a threonylcarbamoyl group on adenosine at position 37 (t(6)A37) in tRNAs that read codons beginning with adenine (By similarity)                                                |
| N | Q83JD1 | DE | t(6)A37 threonylcarbamoyladenine biosynthesis protein RimN;                                                                                                                                                   |
| N | Q83JD1 | DE | tRNA threonylcarbamoyladenine biosynthesis protein RimN;                                                                                                                                                      |
| N | Q83JD1 | DR | tRNA processing                                                                                                                                                                                               |
| N | Q83LP3 | CC | Catalyzes the reversible conversion of 3- phosphohydroxypyruvate to phosphoserine and of 3-hydroxy-2-oxo-4- phosphonoxybutanoate to phosphohydroxythreonine (By similarity).                                  |
| N | Q83LP3 | DE | Phosphohydroxythreonine aminotransferase;                                                                                                                                                                     |
| N | Q83LP3 | DE | Phosphoserine aminotransferase;                                                                                                                                                                               |
| N | Q83LP3 | DR | L-serine biosynthetic process                                                                                                                                                                                 |
| N | Q83LP3 | DR | O-phospho-L-serine:2-oxoglutarate aminotransferase activity                                                                                                                                                   |
| N | Q83LP3 | DR | pyridoxal phosphate binding                                                                                                                                                                                   |

|   |        |    |                                                                                                                                                                                                                                 |
|---|--------|----|---------------------------------------------------------------------------------------------------------------------------------------------------------------------------------------------------------------------------------|
| N | Q83LP3 | DR | pyridoxine biosynthetic process                                                                                                                                                                                                 |
| N | Q83MK8 | DE | D-serine deaminase;                                                                                                                                                                                                             |
| N | Q83MK8 | DE | D-serine dehydratase;                                                                                                                                                                                                           |
| N | Q83MK8 | DR | D-amino acid metabolic process                                                                                                                                                                                                  |
| N | Q83MK8 | DR | D-serine ammonia-lyase activity                                                                                                                                                                                                 |
| N | Q83MK8 | DR | pyridoxal phosphate binding                                                                                                                                                                                                     |
| N | Q83S42 | CC | The UvrABC repair system catalyzes the recognition and processing of DNA lesions.                                                                                                                                               |
| N | Q83S42 | CC | A damage recognition complex composed of 2 uvrA and 2 uvrB subunits scans DNA for abnormalities.                                                                                                                                |
| N | Q83S42 | CC | DNA wrap is dependent on ATP binding by uvrB and probably causes local melting of the DNA helix, facilitating insertion of uvrB beta-hairpin between the DNA strands.                                                           |
| N | Q83S42 | CC | If a lesion is found the uvrA subunits dissociate and the uvrB-DNA preincision complex is formed.                                                                                                                               |
| N | Q83S42 | CC | If no lesion is found, the DNA wraps around the other uvrB subunit that will check the other stand for damage (By similarity).                                                                                                  |
| N | Q83S42 | CC | Then uvrB probes one DNA strand for the presence of a lesion.                                                                                                                                                                   |
| N | Q83S42 | CC | This complex is subsequently bound by uvrC and the second uvrB is released.                                                                                                                                                     |
| N | Q83S42 | CC | Upon binding of the uvrA(2)B(2) complex to a putative damaged site, the DNA wraps around one uvrB monomer.                                                                                                                      |
| N | Q83S42 | DE | Excinuclease ABC subunit B;                                                                                                                                                                                                     |
| N | Q83S42 | DE | Protein uvrB;                                                                                                                                                                                                                   |
| N | Q83S42 | DE | UvrABC system protein B;                                                                                                                                                                                                        |
| N | Q83S42 | DR | excinuclease ABC activity                                                                                                                                                                                                       |
| N | Q83S42 | DR | helicase activity                                                                                                                                                                                                               |
| N | Q83S42 | DR | nucleotide-excision repair                                                                                                                                                                                                      |
| N | Q83SQ8 | CC | Overproduction of CaiE stimulates the activity of CaiB and CaiD (By similarity).                                                                                                                                                |
| N | Q83SQ8 | DE | Carnitine operon protein CaiE;                                                                                                                                                                                                  |
| N | Q83SQ8 | DR | transferase activity                                                                                                                                                                                                            |
| N | Q84BL4 | CC | Binds directly to 23S ribosomal RNA and is necessary for the in vitro assembly process of the 50S ribosomal subunit.                                                                                                            |
| N | Q84BL4 | CC | It is not involved in the protein synthesizing functions of that subunit (By similarity).                                                                                                                                       |
| N | Q84BL4 | DE | 50S ribosomal protein L20;                                                                                                                                                                                                      |
| N | Q84BL4 | DR | structural constituent of ribosome                                                                                                                                                                                              |
| N | Q84G06 | CC | Hydrolyzes phosphonopyruvate.                                                                                                                                                                                                   |
| N | Q84G06 | CC | Not active towards phosphoenolpyruvate, glycerophosphate, phospho-L-serine or phosphoglycolic acid.                                                                                                                             |
| N | Q84G06 | DE | Phosphonopyruvate hydrolase;                                                                                                                                                                                                    |
| N | Q84G06 | DR | metal ion binding                                                                                                                                                                                                               |
| N | Q84G06 | DR | phosphonopyruvate hydrolase activity                                                                                                                                                                                            |
| N | Q84JG2 | CC | Component of a multiprotein complex equivalent of the SWI/SNF complex, an ATP-dependent chromatin-remodeling complex, which is required for the positive and negative regulation of gene expression of a large number of genes. |
| N | Q84JG2 | CC | It changes chromatin structure by altering DNA-histone contacts within a nucleosome, leading eventually to a change in nucleosome position, thus facilitating or repressing binding of gene-specific transcription factors.     |
| N | Q84JG2 | CC | May be a positive regulator of ABA signaling.                                                                                                                                                                                   |
| N | Q84JG2 | CC | May play an essential role in the transition from the vegetative to the reproductive phase of development.                                                                                                                      |
| N | Q84JG2 | DE | SWI/SNF complex subunit SWI3B;                                                                                                                                                                                                  |
| N | Q84JG2 | DE | Transcription regulatory protein SWI3B;                                                                                                                                                                                         |
| N | Q84JG2 | DR | chromatin modification                                                                                                                                                                                                          |
| N | Q84JG2 | DR | identical protein binding                                                                                                                                                                                                       |
| N | Q84JG2 | DR | multicellular organismal development                                                                                                                                                                                            |
| N | Q84N48 | CC | Required for the splicing of group IIB introns in chloroplasts.                                                                                                                                                                 |
| N | Q84N48 | CC | Forms splicing particles with CRS2.                                                                                                                                                                                             |
| N | Q84N48 | CC | Interacts with RNA and confers intron specificity of the splicing particles.                                                                                                                                                    |
| N | Q84N48 | DE | CRS2-associated factor 2, chloroplastic;                                                                                                                                                                                        |
| N | Q84N48 | DE | Chloroplastic group IIA intron splicing facilitator CRS2-associated factor 2;                                                                                                                                                   |
| N | Q84N48 | DR | mRNA processing                                                                                                                                                                                                                 |
| N | Q84QC0 | CC | Mediates resistance to sphinganine-analog mycotoxins (SAMs) by restoring the sphingolipid biosynthesis.                                                                                                                         |
| N | Q84QC0 | CC | Could salvage the transport of GPI-anchored proteins from the endoplasmic reticulum to the Golgi apparatus in ceramides-depleted cells after SAM exposure (By similarity).                                                      |
| N | Q84QC0 | DE | ASC1-like protein 3;                                                                                                                                                                                                            |
| N | Q84QC0 | DE | Alternaria stem canker resistance-like protein 3;                                                                                                                                                                               |

|   |        |    |                                                                                                                                                                                                                                       |
|---|--------|----|---------------------------------------------------------------------------------------------------------------------------------------------------------------------------------------------------------------------------------------|
| N | Q84QC0 | DR | lipid biosynthetic process                                                                                                                                                                                                            |
| N | Q84WV9 | CC | Converts glutamine and N-terminal glutamyl residues in peptides to 5-oxoproline and 5-oxoproline residues                                                                                                                             |
| N | Q84WV9 | CC | Not involved in the major pathway for 5-oxoproline production.                                                                                                                                                                        |
| N | Q84WV9 | DE | Glutaminyl cyclase;                                                                                                                                                                                                                   |
| N | Q84WV9 | DE | Glutaminyl-peptide cyclotransferase;                                                                                                                                                                                                  |
| N | Q84WV9 | DR | acyltransferase activity                                                                                                                                                                                                              |
| N | Q84WV9 | DR | glutaminyl-peptide cyclotransferase activity                                                                                                                                                                                          |
| N | Q84WV9 | DR | peptidyl-pyroglutamic acid biosynthetic process, using glutaminyl-peptide cyclotransferase                                                                                                                                            |
| N | Q84ZX5 | DE | Art v 1;                                                                                                                                                                                                                              |
| N | Q84ZX5 | DE | Defensin-like protein 1;                                                                                                                                                                                                              |
| N | Q84ZX5 | DE | Major pollen allergen Art v 1;                                                                                                                                                                                                        |
| N | Q84ZX5 | DR | defense response                                                                                                                                                                                                                      |
| N | Q851L5 | CC | Hydrolyzes certain amino acid conjugates of the plant growth regulator indole-3-acetic acid (IAA) (By similarity).                                                                                                                    |
| N | Q851L5 | DE | IAA-amino acid hydrolase ILR1-like 3;                                                                                                                                                                                                 |
| N | Q851L5 | DR | hydrolase activity                                                                                                                                                                                                                    |
| N | Q85FX0 | CC | Component of the cytochrome b6-f complex, which mediates electron transfer between photosystem II (PSII) and photosystem I (PSI), cyclic electron flow around PSI, and state transitions (By similarity).                             |
| N | Q85FX0 | DE | Apocytochrome f;                                                                                                                                                                                                                      |
| N | Q85FX0 | DR | electron carrier activity                                                                                                                                                                                                             |
| N | Q85FX0 | DR | electron transport chain                                                                                                                                                                                                              |
| N | Q85FX0 | DR | photosynthesis                                                                                                                                                                                                                        |
| N | Q85FX8 | CC | Component of the cytochrome b6-f complex, which mediates electron transfer between photosystem II (PSII) and photosystem I (PSI), cyclic electron flow around PSI, and state transitions (By similarity).                             |
| N | Q85FX8 | DE | Cytochrome b6-f complex subunit 7;                                                                                                                                                                                                    |
| N | Q85FX8 | DE | Cytochrome b6-f complex subunit VII;                                                                                                                                                                                                  |
| N | Q85FX8 | DE | Cytochrome b6-f complex subunit petM;                                                                                                                                                                                                 |
| N | Q85FX8 | DR | electron transport chain                                                                                                                                                                                                              |
| N | Q85FX8 | DR | photosynthesis                                                                                                                                                                                                                        |
| N | Q85PQ7 | CC | Core subunit of the mitochondrial membrane respiratory chain NADH dehydrogenase (Complex I) that is believed to belong to the minimal assembly required for functions in the transfer of electrons from NADH to the respiratory chain |
| N | Q85PQ7 | CC | The immediate electron acceptor for the enzyme is believed to be ubiquinone (By similarity).                                                                                                                                          |
| N | Q85PQ7 | DE | NADH dehydrogenase subunit 2;                                                                                                                                                                                                         |
| N | Q85PQ7 | DE | NADH-ubiquinone oxidoreductase chain 2;                                                                                                                                                                                               |
| N | Q85PQ7 | DR | NADH dehydrogenase (ubiquinone) activity                                                                                                                                                                                              |
| N | Q85PQ7 | DR | mitochondrial electron transport, NADH to ubiquinone                                                                                                                                                                                  |
| N | Q85RV3 | CC | Component of the ubiquinol-cytochrome c reductase complex (complex III or cytochrome b-c1 complex), which is a respiratory chain that generates an electrochemical potential coupled to ATP synthesis (By similarity).                |
| N | Q85RV3 | DE | Complex III subunit 3;                                                                                                                                                                                                                |
| N | Q85RV3 | DE | Complex III subunit III;                                                                                                                                                                                                              |
| N | Q85RV3 | DE | Cytochrome b-c1 complex subunit 3;                                                                                                                                                                                                    |
| N | Q85RV3 | DE | Cytochrome b;                                                                                                                                                                                                                         |
| N | Q85RV3 | DE | Ubiquinol-cytochrome-c reductase complex cytochrome b subunit;                                                                                                                                                                        |
| N | Q85RV3 | DR | electron carrier activity                                                                                                                                                                                                             |
| N | Q85RV3 | DR | metal ion binding                                                                                                                                                                                                                     |
| N | Q85RV3 | DR | oxidoreductase activity                                                                                                                                                                                                               |
| N | Q85RV3 | DR | respiratory electron transport chain                                                                                                                                                                                                  |
| N | Q86A14 | DE | Probable splicing factor 3A subunit 1;                                                                                                                                                                                                |
| N | Q86A14 | DR | nuclear mRNA splicing, via spliceosome                                                                                                                                                                                                |
| N | Q86CR6 | CC | Ubiquitin-like protein involved in autophagy vesicles formation                                                                                                                                                                       |
| N | Q86CR6 | CC | Conjugated to atg5 through an ubiquitin-like conjugating system involving also atg7 as an E1-like activating enzyme is essential for its function (By similarity).                                                                    |
| N | Q86CR6 | CC | Required for atg8 association to the vesicle membranes                                                                                                                                                                                |
| N | Q86CR6 | DE | APG12-like;                                                                                                                                                                                                                           |
| N | Q86CR6 | DE | Autophagy-related protein 12;                                                                                                                                                                                                         |
| N | Q86CR6 | DE | Ubiquitin-like protein atg12;                                                                                                                                                                                                         |
| N | Q86CR6 | DR | autophagic vacuole assembly                                                                                                                                                                                                           |
| N | Q86CR6 | DR | protein transport                                                                                                                                                                                                                     |

|   |        |    |                                                                                                                                                                                                                                                  |
|---|--------|----|--------------------------------------------------------------------------------------------------------------------------------------------------------------------------------------------------------------------------------------------------|
| N | Q86HS8 | CC | Component of the Mediator complex, a coactivator involved in the regulated transcription of nearly all RNA polymerase II-dependent genes                                                                                                         |
| N | Q86HS8 | CC | Mediator functions as a bridge to convey information from gene-specific regulatory proteins to the basal RNA polymerase II transcription machinery                                                                                               |
| N | Q86HS8 | CC | Mediator is recruited to promoters by direct interactions with regulatory proteins and serves as a scaffold for the assembly of a functional preinitiation complex with RNA polymerase II and the general transcription factors (By similarity). |
| N | Q86HS8 | DE | Mediator complex subunit 30;                                                                                                                                                                                                                     |
| N | Q86HS8 | DE | Putative mediator of RNA polymerase II transcription subunit 30;                                                                                                                                                                                 |
| N | Q86JM7 | CC | P2X receptors are ATP-gated ion channels that play a role in intracellular calcium signaling                                                                                                                                                     |
| N | Q86JM7 | CC | Exclusively selective for ATP over other nucleotides                                                                                                                                                                                             |
| N | Q86JM7 | CC | Found to be permeable to chloride ions                                                                                                                                                                                                           |
| N | Q86JM7 | CC | Inhibited by copper and sodium ions.                                                                                                                                                                                                             |
| N | Q86JM7 | CC | insensitive to P2 receptor antagonists PPADS, suramin and 2,3-O-(2,4,6-trinitrophenyl)-ATP but inhibited by nanomolar concentrations of copper and sodium ion                                                                                    |
| N | Q86JM7 | CC | Inward currents evoked by intracellular ATP and ATP analogs                                                                                                                                                                                      |
| N | Q86JM7 | CC | It has been reported that p2xA is not essential for osmoregulation (PubMed:19833731), however this information is in contradiction with another source (PubMed:17625565) which indicates that p2xA is required for osmoregulation                |
| N | Q86JM7 | CC | More permeable to ammonium than either sodium or potassium ions and less permeable to choline                                                                                                                                                    |
| N | Q86JM7 | CC | Not required for the purinergic response to extracellular nucleotides                                                                                                                                                                            |
| N | Q86JM7 | DE | P2X receptor A;                                                                                                                                                                                                                                  |
| N | Q86JM7 | DR | cellular water homeostasis                                                                                                                                                                                                                       |
| N | Q86JM7 | DR | hypotonic response                                                                                                                                                                                                                               |
| N | Q86JM7 | DR | ligand-gated ion channel activity                                                                                                                                                                                                                |
| N | Q86JM7 | DR | receptor activity                                                                                                                                                                                                                                |
| N | Q86JM7 | DR | regulation of calcium-mediated signaling                                                                                                                                                                                                         |
| N | Q86L05 | DE | 60S ribosomal protein L10a;                                                                                                                                                                                                                      |
| N | Q86L05 | DR | RNA processing                                                                                                                                                                                                                                   |
| N | Q86L05 | DR | structural constituent of ribosome                                                                                                                                                                                                               |
| N | Q86TS7 | DE | UPF0730 protein CS0DE013YM09;                                                                                                                                                                                                                    |
| N | Q86V97 | DE | Kelch repeat and BTB domain-containing protein 6;                                                                                                                                                                                                |
| N | Q86V97 | DR | protein binding                                                                                                                                                                                                                                  |
| N | Q86XA9 | DE | HEAT repeat-containing protein 5A;                                                                                                                                                                                                               |
| N | Q86YN6 | CC | Plays a role of stimulator of transcription factors and nuclear receptors activities                                                                                                                                                             |
| N | Q86YN6 | CC | Activates transcriptional activity of estrogen receptor alpha, nuclear respiratory factor 1 (NRF1) and glucocorticoid receptor in the presence of glucocorticoids                                                                                |
| N | Q86YN6 | CC | May be involved in fat oxidation and non-oxidative glucose metabolism and in the regulation of energy expenditure.                                                                                                                               |
| N | Q86YN6 | CC | May play a role in constitutive non-adrenergic-mediated mitochondrial biogenesis as suggested by increased basal oxygen consumption and mitochondrial number when overexpressed                                                                  |
| N | Q86YN6 | DE | PGC-1-beta;                                                                                                                                                                                                                                      |
| N | Q86YN6 | DE | PGC-1-related estrogen receptor alpha coactivator;                                                                                                                                                                                               |
| N | Q86YN6 | DE | PPAR-gamma coactivator 1-beta;                                                                                                                                                                                                                   |
| N | Q86YN6 | DE | PPARGC-1-beta;                                                                                                                                                                                                                                   |
| N | Q86YN6 | DE | Peroxisome proliferator-activated receptor gamma coactivator 1-beta;                                                                                                                                                                             |
| N | Q86YN6 | DR | AF-2 domain binding                                                                                                                                                                                                                              |
| N | Q86YN6 | DR | RNA polymerase II transcription mediator activity                                                                                                                                                                                                |
| N | Q86YN6 | DR | estrogen receptor binding                                                                                                                                                                                                                        |
| N | Q86YN6 | DR | estrogen receptor signaling pathway                                                                                                                                                                                                              |
| N | Q86YN6 | DR | ligand-dependent nuclear receptor transcription coactivator activity                                                                                                                                                                             |
| N | Q86YN6 | DR | nucleotide binding                                                                                                                                                                                                                               |
| N | Q86YN6 | DR | positive regulation of transcription from RNA polymerase II promoter                                                                                                                                                                             |
| N | Q86YN6 | DR | receptor activator activity                                                                                                                                                                                                                      |
| N | Q874J6 | CC | Histone H3-like variant which exclusively replaces conventional H3 in the nucleosome core of centromeric chromatin at the inner plate of the kinetochore                                                                                         |
| N | Q874J6 | CC | May serve as an epigenetic mark that propagates centromere identity through replication and cell division (By similarity).                                                                                                                       |
| N | Q874J6 | CC | Required for recruitment and assembly of kinetochore proteins, mitotic progression and chromosome segregation                                                                                                                                    |
| N | Q874J6 | DE | CENP-A homolog;                                                                                                                                                                                                                                  |
| N | Q874J6 | DE | Histone H3-like centromeric protein CSE4;                                                                                                                                                                                                        |

|   |        |    |                                                                                                                                                                                                                                                                                                                                                                                           |
|---|--------|----|-------------------------------------------------------------------------------------------------------------------------------------------------------------------------------------------------------------------------------------------------------------------------------------------------------------------------------------------------------------------------------------------|
| N | Q874J6 | DR | nucleosome assembly                                                                                                                                                                                                                                                                                                                                                                       |
| N | Q87D63 | DE | GTP cyclohydrolase 1;                                                                                                                                                                                                                                                                                                                                                                     |
| N | Q87D63 | DE | GTP cyclohydrolase I;                                                                                                                                                                                                                                                                                                                                                                     |
| N | Q87D63 | DR | GTP cyclohydrolase I activity                                                                                                                                                                                                                                                                                                                                                             |
| N | Q87D63 | DR | metal ion binding                                                                                                                                                                                                                                                                                                                                                                         |
| N | Q87D63 | DR | one-carbon metabolic process                                                                                                                                                                                                                                                                                                                                                              |
| N | Q87D63 | DR | tetrahydrofolate biosynthetic process                                                                                                                                                                                                                                                                                                                                                     |
| N | Q87D75 | DE | Putative fis-like DNA-binding protein;                                                                                                                                                                                                                                                                                                                                                    |
| N | Q87D75 | DR | regulation of transcription, DNA-dependent                                                                                                                                                                                                                                                                                                                                                |
| N | Q87D75 | DR | sequence-specific DNA binding transcription factor activity                                                                                                                                                                                                                                                                                                                               |
| N | Q87DY8 | CC | Catalyzes the ATP-dependent amination of UTP to CTP with either L-glutamine or ammonia as the source of nitrogen (By similarity).                                                                                                                                                                                                                                                         |
| N | Q87DY8 | DE | CTP synthase;                                                                                                                                                                                                                                                                                                                                                                             |
| N | Q87DY8 | DE | CTP synthetase;                                                                                                                                                                                                                                                                                                                                                                           |
| N | Q87DY8 | DE | UTP--ammonia ligase;                                                                                                                                                                                                                                                                                                                                                                      |
| N | Q87DY8 | DR | CTP synthase activity                                                                                                                                                                                                                                                                                                                                                                     |
| N | Q87DY8 | DR | glutamine metabolic process                                                                                                                                                                                                                                                                                                                                                               |
| N | Q87DY8 | DR | pyrimidine nucleotide biosynthetic process                                                                                                                                                                                                                                                                                                                                                |
| N | Q87E50 | CC | ATP-dependent specificity component of the Clp protease                                                                                                                                                                                                                                                                                                                                   |
| N | Q87E50 | CC | Can perform chaperone functions in the absence of ClpP (By similarity).                                                                                                                                                                                                                                                                                                                   |
| N | Q87E50 | CC | It directs the protease to specific substrates                                                                                                                                                                                                                                                                                                                                            |
| N | Q87E50 | DE | ATP-dependent Clp protease ATP-binding subunit ClpX;                                                                                                                                                                                                                                                                                                                                      |
| N | Q87E50 | DR | ATPase activity                                                                                                                                                                                                                                                                                                                                                                           |
| N | Q87E50 | DR | protein dimerization activity                                                                                                                                                                                                                                                                                                                                                             |
| N | Q87E50 | DR | protein folding                                                                                                                                                                                                                                                                                                                                                                           |
| N | Q87E50 | DR | unfolded protein binding                                                                                                                                                                                                                                                                                                                                                                  |
| N | Q87E50 | DR | zinc ion binding                                                                                                                                                                                                                                                                                                                                                                          |
| N | Q87E51 | CC | Cleaves peptides in various proteins in a process that requires ATP hydrolysis                                                                                                                                                                                                                                                                                                            |
| N | Q87E51 | CC | Has a chymotrypsin-like activity                                                                                                                                                                                                                                                                                                                                                          |
| N | Q87E51 | CC | Plays a major role in the degradation of misfolded proteins (By similarity).                                                                                                                                                                                                                                                                                                              |
| N | Q87E51 | DE | ATP-dependent Clp protease proteolytic subunit;                                                                                                                                                                                                                                                                                                                                           |
| N | Q87E51 | DE | Endopeptidase Clp;                                                                                                                                                                                                                                                                                                                                                                        |
| N | Q87E51 | DR | serine-type endopeptidase activity                                                                                                                                                                                                                                                                                                                                                        |
| N | Q87FD6 | CC | Specifically catalyzes the cleavage of the D-lactyl ether substituent of MurNAc 6-phosphate, producing GlcNAc 6-phosphate and D-lactate<br>1 together with AnmK, is also required for the utilization of anhydoro-N-acetylmuramic acid (anhMurNAc) either imported from the medium or derived from its own cell wall murein, and thus plays a role in cell wall recycling (By similarity) |
| N | Q87FD6 | CC |                                                                                                                                                                                                                                                                                                                                                                                           |
| N | Q87FD6 | DE | MurNAc-6-P etherase 2;                                                                                                                                                                                                                                                                                                                                                                    |
| N | Q87FD6 | DE | N-acetylmuramic acid 6-phosphate etherase 2;                                                                                                                                                                                                                                                                                                                                              |
| N | Q87FD6 | DE | N-acetylmuramic acid 6-phosphate hydrolase 2;                                                                                                                                                                                                                                                                                                                                             |
| N | Q87FD6 | DE | N-acetylmuramic acid 6-phosphate lyase 2;                                                                                                                                                                                                                                                                                                                                                 |
| N | Q87FD6 | DR | amino sugar catabolic process                                                                                                                                                                                                                                                                                                                                                             |
| N | Q87FD6 | DR | hydro-lyase activity                                                                                                                                                                                                                                                                                                                                                                      |
| N | Q87FD6 | DR | sugar binding                                                                                                                                                                                                                                                                                                                                                                             |
| N | Q87KM9 | CC | Synthesis of 3-octaprenyl-4-hydroxybenzoate (By similarity).                                                                                                                                                                                                                                                                                                                              |
| N | Q87KM9 | DE | 4-HB polyprenyltransferase;                                                                                                                                                                                                                                                                                                                                                               |
| N | Q87KM9 | DE | 4-hydroxybenzoate octaprenyltransferase;                                                                                                                                                                                                                                                                                                                                                  |
| N | Q87KM9 | DR | prenyltransferase activity                                                                                                                                                                                                                                                                                                                                                                |
| N | Q87KM9 | DR | ubiquinone biosynthetic process                                                                                                                                                                                                                                                                                                                                                           |
| N | Q87LT0 | CC | Specifically methylates guanosine-37 in various tRNAs (By similarity).                                                                                                                                                                                                                                                                                                                    |
| N | Q87LT0 | DE | M1G-methyltransferase;                                                                                                                                                                                                                                                                                                                                                                    |
| N | Q87LT0 | DE | tRNA (guanine-N(1)-)-methyltransferase;                                                                                                                                                                                                                                                                                                                                                   |
| N | Q87LT0 | DE | tRNA [GM37] methyltransferase;                                                                                                                                                                                                                                                                                                                                                            |
| N | Q87LT0 | DR | tRNA (guanine-N1-)-methyltransferase activity                                                                                                                                                                                                                                                                                                                                             |
| N | Q87M23 | CC | The enzymes which catalyze the reversible phosphorolysis of pyrimidine nucleosides are involved in the degradation of these compounds and in their utilization as carbon and energy sources, or in the rescue of pyrimidine bases for nucleotide synthesis (By similarity).                                                                                                               |
| N | Q87M23 | DE | Thymidine phosphorylase;                                                                                                                                                                                                                                                                                                                                                                  |
| N | Q87M23 | DR | pyrimidine base metabolic process                                                                                                                                                                                                                                                                                                                                                         |
| N | Q87M23 | DR | pyrimidine nucleoside metabolic process                                                                                                                                                                                                                                                                                                                                                   |
| N | Q87M23 | DR | pyrimidine-nucleoside phosphorylase activity                                                                                                                                                                                                                                                                                                                                              |
| N | Q87M23 | DR | thymidine phosphorylase activity                                                                                                                                                                                                                                                                                                                                                          |



|   |        |    |                                                                                                                                                                               |
|---|--------|----|-------------------------------------------------------------------------------------------------------------------------------------------------------------------------------|
| N | Q87MD6 | CC | Modifies, by uridylylation or deuridylylation the PII (glnB) regulatory protein (By similarity).                                                                              |
| N | Q87MD6 | DE | PII uridylyl-transferase;                                                                                                                                                     |
| N | Q87MD6 | DE | Uridylyl-removing enzyme;                                                                                                                                                     |
| N | Q87MD6 | DE | [Protein-PII] uridylyltransferase;                                                                                                                                            |
| N | Q87MD6 | DR | [protein-PII] uridylyltransferase activity                                                                                                                                    |
| N | Q87MD6 | DR | amino acid binding                                                                                                                                                            |
| N | Q87MD6 | DR | nitrogen compound metabolic process                                                                                                                                           |
| N | Q87QM0 | DE | High frequency lysogenization protein hflD homolog;                                                                                                                           |
| N | Q87R80 | CC | Cleaves peptides in various proteins in a process that requires ATP hydrolysis                                                                                                |
| N | Q87R80 | CC | Has a chymotrypsin-like activity                                                                                                                                              |
| N | Q87R80 | CC | Plays a major role in the degradation of misfolded proteins (By similarity).                                                                                                  |
| N | Q87R80 | DE | ATP-dependent Clp protease proteolytic subunit;                                                                                                                               |
| N | Q87R80 | DE | Endopeptidase Clp;                                                                                                                                                            |
| N | Q87R80 | DR | serine-type endopeptidase activity                                                                                                                                            |
| N | Q87TB0 | CC | Promotes RNA polymerase assembly                                                                                                                                              |
| N | Q87TB0 | CC | Latches the N- and C- terminal regions of the beta' subunit thereby facilitating its interaction with the beta and alpha subunits (By similarity).                            |
| N | Q87TB0 | DE | DNA-directed RNA polymerase subunit omega;                                                                                                                                    |
| N | Q87TB0 | DE | RNA polymerase omega subunit;                                                                                                                                                 |
| N | Q87TB0 | DE | RNAP omega subunit;                                                                                                                                                           |
| N | Q87TB0 | DE | Transcriptase subunit omega;                                                                                                                                                  |
| N | Q87TB0 | DR | DNA-directed RNA polymerase activity                                                                                                                                          |
| N | Q87V59 | CC | Transfers 2-(5-triphosphoribosyl)-5-dephosphocoenzyme-A to the apo-[acyl-carrier-protein] of the malonate decarboxylase to yield holo-[acyl-carrier-protein] (By similarity). |
| N | Q87V59 | DE | Holo-ACP synthase;                                                                                                                                                            |
| N | Q87V59 | DE | Malonate decarboxylase holo-[acyl-carrier-protein] synthase;                                                                                                                  |
| N | Q87V59 | DE | Phosphoribosyl-dephospho-CoA transferase;                                                                                                                                     |
| N | Q87V59 | DR | nucleotidyltransferase activity                                                                                                                                               |
| N | Q87YG5 | CC | Catalyzes the reversible formation of acyl-phosphate (acyl-PO(4)) from acyl-[acyl-carrier-protein] (acyl-ACP)                                                                 |
| N | Q87YG5 | CC | This enzyme utilizes acyl-ACP as fatty acyl donor, but not acyl-CoA (By similarity).                                                                                          |
| N | Q87YG5 | DE | Acyl-ACP phosphotransacylase;                                                                                                                                                 |
| N | Q87YG5 | DE | Acyl-[acyl-carrier-protein]--phosphate acyltransferase;                                                                                                                       |
| N | Q87YG5 | DE | Phosphate acyltransferase;                                                                                                                                                    |
| N | Q87YG5 | DE | Phosphate-acyl-ACP acyltransferase;                                                                                                                                           |
| N | Q87YG5 | DR | fatty acid biosynthetic process                                                                                                                                               |
| N | Q87YG5 | DR | phospholipid biosynthetic process                                                                                                                                             |
| N | Q87YG5 | DR | transferase activity, transferring acyl groups other than amino-acyl groups                                                                                                   |
| N | Q88421 | DE | Uncharacterized protein ORF12;                                                                                                                                                |
| N | Q885T7 | CC | Catalyzes the interconversion of methylthioribose-1-phosphate (MTR-1-P) into methylthioribulose-1-phosphate (MTRu-1-P) (By similarity).                                       |
| N | Q885T7 | DE | MTR-1-P isomerase;                                                                                                                                                            |
| N | Q885T7 | DE | Methylthioribose-1-phosphate isomerase;                                                                                                                                       |
| N | Q885T7 | DE | S-methyl-5-thioribose-1-phosphate isomerase;                                                                                                                                  |
| N | Q885T7 | DR | S-methyl-5-thioribose-1-phosphate isomerase activity                                                                                                                          |
| N | Q885T7 | DR | methionine biosynthetic process                                                                                                                                               |
| N | Q889F0 | CC | Catalyzes the transfer of a phosphate group to glutamate to form glutamate 5-phosphate which rapidly cyclizes to 5-oxoproline.                                                |
| N | Q889F0 | DE | Gamma-glutamyl kinase;                                                                                                                                                        |
| N | Q889F0 | DE | Glutamate 5-kinase;                                                                                                                                                           |
| N | Q889F0 | DR | glutamate 5-kinase activity                                                                                                                                                   |
| N | Q889F0 | DR | proline biosynthetic process                                                                                                                                                  |
| N | Q88BD7 | CC | Catalyzes the transfer of a ribosyl phosphate group from 5-phosphoribose 1-diphosphate to orotate, leading to the formation of orotidine monophosphate (OMP) (By similarity). |
| N | Q88BD7 | DE | Orotate phosphoribosyltransferase;                                                                                                                                            |
| N | Q88BD7 | DR | nucleoside metabolic process                                                                                                                                                  |
| N | Q88BD7 | DR | orotate phosphoribosyltransferase activity                                                                                                                                    |
| N | Q88BD7 | DR | pyrimidine nucleotide biosynthetic process                                                                                                                                    |
| N | Q88EA1 | CC | Bifunctional enzyme which can phosphorylate or dephosphorylate isocitrate dehydrogenase (IDH) on a specific serine residue                                                    |
| N | Q88EA1 | CC | This is a regulatory mechanism which enables bacteria to bypass the Krebs cycle via the glyoxylate shunt in response to the source of carbon                                  |

|   |        |    |                                                                                                                                                                                                                    |
|---|--------|----|--------------------------------------------------------------------------------------------------------------------------------------------------------------------------------------------------------------------|
| N | Q88EA1 | CC | When bacteria are grown on glucose, IDH is fully active and unphosphorylated, but when grown on acetate or ethanol, the activity of IDH declines drastically concomitant with its phosphorylation (By similarity). |
| N | Q88EA1 | DE | IDH kinase/phosphatase;                                                                                                                                                                                            |
| N | Q88EA1 | DE | Isocitrate dehydrogenase kinase/phosphatase;                                                                                                                                                                       |
| N | Q88EA1 | DR | [isocitrate dehydrogenase (NADP+)] kinase activity                                                                                                                                                                 |
| N | Q88EA1 | DR | glucose metabolic process                                                                                                                                                                                          |
| N | Q88EA1 | DR | glyoxylate cycle                                                                                                                                                                                                   |
| N | Q88EA1 | DR | phosphoprotein phosphatase activity                                                                                                                                                                                |
| N | Q88EA1 | DR | tricarboxylic acid cycle                                                                                                                                                                                           |
| N | Q88EI4 | CC | Catalyzes the NAD-dependent reduction of succinylglutamate semialdehyde into succinylglutamate (By similarity).                                                                                                    |
| N | Q88EI4 | DE | N-succinylglutamate 5-semialdehyde dehydrogenase;                                                                                                                                                                  |
| N | Q88EI4 | DE | Succinylglutamic semialdehyde dehydrogenase;                                                                                                                                                                       |
| N | Q88EI4 | DR | arginine catabolic process                                                                                                                                                                                         |
| N | Q88EI4 | DR | oxidation-reduction process                                                                                                                                                                                        |
| N | Q88EI4 | DR | succinylglutamate-semialdehyde dehydrogenase activity                                                                                                                                                              |
| N | Q88PK5 | CC | Co-chaperone involved in the maturation of iron-sulfur cluster-containing proteins                                                                                                                                 |
| N | Q88PK5 | CC | Seems to help targeting proteins to be folded toward hscA (By similarity).                                                                                                                                         |
| N | Q88PK5 | DE | Co-chaperone protein hscB homolog;                                                                                                                                                                                 |
| N | Q88PK5 | DR | chaperone binding                                                                                                                                                                                                  |
| N | Q88PK5 | DR | heat shock protein binding                                                                                                                                                                                         |
| N | Q88PK5 | DR | protein folding                                                                                                                                                                                                    |
| N | Q88QH1 | CC | Catalyzes the conversion of GTP to 2,5-diamino-6- ribosylamino-4(3H)-pyrimidinone 5'-phosphate (DARP), formate and pyrophosphate (By similarity).                                                                  |
| N | Q88QH1 | DE | GTP cyclohydrolase II;                                                                                                                                                                                             |
| N | Q88QH1 | DE | GTP cyclohydrolase-2;                                                                                                                                                                                              |
| N | Q88QH1 | DR | GTP cyclohydrolase II activity                                                                                                                                                                                     |
| N | Q88QH1 | DR | metal ion binding                                                                                                                                                                                                  |
| N | Q88QH1 | DR | riboflavin biosynthetic process                                                                                                                                                                                    |
| N | Q88R93 | CC | Part of the ABC transporter complex SsuABC involved in aliphatic sulfonates import                                                                                                                                 |
| N | Q88R93 | CC | Responsible for energy coupling to the transport system (By similarity).                                                                                                                                           |
| N | Q88R93 | DE | Aliphatic sulfonates import ATP-binding protein SsuB;                                                                                                                                                              |
| N | Q88R93 | DR | ATPase activity                                                                                                                                                                                                    |
| N | Q88R93 | DR | transporter activity                                                                                                                                                                                               |
| N | Q88S50 | CC | Involved in the anomeric conversion of L-rhamnose (By similarity).                                                                                                                                                 |
| N | Q88S50 | DE | L-rhamnose mutarotase;                                                                                                                                                                                             |
| N | Q88S50 | DE | Rhamnose 1-epimerase;                                                                                                                                                                                              |
| N | Q88S50 | DE | Type-3 mutarotase;                                                                                                                                                                                                 |
| N | Q88S50 | DR | racemase and epimerase activity, acting on carbohydrates and derivatives                                                                                                                                           |
| N | Q88S50 | DR | rhamnose metabolic process                                                                                                                                                                                         |
| N | Q88VC8 | CC | Reversibly transfers an adenylyl group from ATP to 4'- phosphopantetheine, yielding dephospho-CoA (dPCoA) and pyrophosphate (By similarity).                                                                       |
| N | Q88VC8 | DE | Dephospho-CoA pyrophosphorylase;                                                                                                                                                                                   |
| N | Q88VC8 | DE | Pantetheine-phosphate adenylyltransferase;                                                                                                                                                                         |
| N | Q88VC8 | DE | Phosphopantetheine adenylyltransferase;                                                                                                                                                                            |
| N | Q88VC8 | DR | coenzyme A biosynthetic process                                                                                                                                                                                    |
| N | Q88VC8 | DR | pantetheine-phosphate adenylyltransferase activity                                                                                                                                                                 |
| N | Q88WL3 | CC | Initiates the free amino group of the aminoacyl moiety of methionyl-tRNA (Met-tRNA)                                                                                                                                |
| N | Q88WL3 | CC | The formyl group appears to play a dual role in the initiator identity of N-formylmethionyl-tRNA by: (I) promoting its recognition by IF2 and (II) impairing its binding to EFTu-GTP (By similarity).              |
| N | Q88WL3 | DE | Methionyl-tRNA formyltransferase;                                                                                                                                                                                  |
| N | Q88WL3 | DR | methionyl-tRNA formyltransferase activity                                                                                                                                                                          |
| N | Q88WL3 | DR | methyltransferase activity                                                                                                                                                                                         |
| N | Q892S8 | DE | Deoxyguanosinetriphosphate triphosphohydrolase-like protein;                                                                                                                                                       |
| N | Q892S8 | DR | GTP metabolic process                                                                                                                                                                                              |
| N | Q892S8 | DR | dGTPase activity                                                                                                                                                                                                   |
| N | Q892S8 | DR | magnesium ion binding                                                                                                                                                                                              |
| N | Q892Z2 | DE | Uncharacterized RNA methyltransferase CTC_01941;                                                                                                                                                                   |
| N | Q892Z2 | DR | 4 iron, 4 sulfur cluster binding                                                                                                                                                                                   |
| N | Q892Z2 | DR | RNA methyltransferase activity                                                                                                                                                                                     |
| N | Q892Z2 | DR | RNA processing                                                                                                                                                                                                     |
| N | Q892Z2 | DR | metal ion binding                                                                                                                                                                                                  |
| N | Q89420 | CC | E2 regulates viral transcription and DNA replication                                                                                                                                                               |

|   |        |    |                                                                                                                                                                                                                                     |
|---|--------|----|-------------------------------------------------------------------------------------------------------------------------------------------------------------------------------------------------------------------------------------|
| N | Q89420 | CC | It binds to the E2RE response element (5'-ACCNNNNNNGGT-3') present in multiple copies in the regulatory region                                                                                                                      |
| N | Q89420 | CC | It can either activate or repress transcription depending on E2RE's position with regards to proximal promoter elements                                                                                                             |
| N | Q89420 | CC | Repression occurs by sterically hindering the assembly of the transcription initiation complex                                                                                                                                      |
| N | Q89420 | CC | The E1-E2 complex binds to the origin of DNA replication.                                                                                                                                                                           |
| N | Q89420 | DE | Regulatory protein E2;                                                                                                                                                                                                              |
| N | Q89420 | DR | DNA replication                                                                                                                                                                                                                     |
| N | Q89420 | DR | nucleotide binding                                                                                                                                                                                                                  |
| N | Q89420 | DR | regulation of DNA replication                                                                                                                                                                                                       |
| N | Q89420 | DR | regulation of transcription, DNA-dependent                                                                                                                                                                                          |
| N | Q89420 | DR | sequence-specific DNA binding transcription factor activity                                                                                                                                                                         |
| N | Q89420 | DR | viral reproduction                                                                                                                                                                                                                  |
| N | Q899S0 | CC | Specifically methylates the m7 position of a guanosine in 16S rRNA (By similarity)                                                                                                                                                  |
| N | Q899S0 | DE | 16S rRNA 7-methylguanosine methyltransferase;                                                                                                                                                                                       |
| N | Q899S0 | DE | 16S rRNA m7G methyltransferase;                                                                                                                                                                                                     |
| N | Q899S0 | DE | Ribosomal RNA small subunit methyltransferase G;                                                                                                                                                                                    |
| N | Q899S0 | DR | rRNA methyltransferase activity                                                                                                                                                                                                     |
| N | Q89A71 | CC | One of the primary rRNA binding proteins                                                                                                                                                                                            |
| N | Q89A71 | CC | It has been suggested to have peptidyltransferase activity, this is somewhat controversial                                                                                                                                          |
| N | Q89A71 | CC | Makes several contacts with the 16S rRNA in the 70S ribosome (By similarity).                                                                                                                                                       |
| N | Q89A71 | CC | Required for association of the 30S and 50S subunits to form the 70S ribosome, for tRNA binding and peptide bond formation                                                                                                          |
| N | Q89A71 | DE | 50S ribosomal protein L2;                                                                                                                                                                                                           |
| N | Q89A71 | DR | structural constituent of ribosome                                                                                                                                                                                                  |
| N | Q89A71 | DR | transferase activity                                                                                                                                                                                                                |
| N | Q89AD1 | CC | 5'-3' exonuclease acting preferentially on double- stranded DNA (By similarity).                                                                                                                                                    |
| N | Q89AD1 | DE | 5'-3' exonuclease;                                                                                                                                                                                                                  |
| N | Q89AD1 | DR | 5'-3' exonuclease activity                                                                                                                                                                                                          |
| N | Q89AE1 | DE | Protein tldD homolog;                                                                                                                                                                                                               |
| N | Q89AI3 | CC | ATPase required for the correct placement of the division site                                                                                                                                                                      |
| N | Q89AI3 | CC | Cell division inhibitors minC and minD act in concert to form an inhibitor capable of blocking formation of the polar Z ring septums                                                                                                |
| N | Q89AI3 | CC | Rapidly oscillates between the poles of the cell to destabilize ftsZ filaments that have formed before they mature into polar Z rings (By similarity).                                                                              |
| N | Q89AI3 | DE | Cell division inhibitor minD;                                                                                                                                                                                                       |
| N | Q89AI3 | DE | Septum site-determining protein minD;                                                                                                                                                                                               |
| N | Q89AI3 | DR | ATPase activity                                                                                                                                                                                                                     |
| N | Q89AI3 | DR | barrier septum site selection                                                                                                                                                                                                       |
| N | Q89AX6 | DE | Histidine biosynthesis bifunctional protein HisIE;                                                                                                                                                                                  |
| N | Q89AX6 | DE | Phosphoribosyl-AMP cyclohydrolase;                                                                                                                                                                                                  |
| N | Q89AX6 | DE | Phosphoribosyl-ATP pyrophosphatase;                                                                                                                                                                                                 |
| N | Q89AX6 | DR | histidine biosynthetic process                                                                                                                                                                                                      |
| N | Q89AX6 | DR | phosphoribosyl-AMP cyclohydrolase activity                                                                                                                                                                                          |
| N | Q89AX6 | DR | phosphoribosyl-ATP diphosphatase activity                                                                                                                                                                                           |
| N | Q89B22 | CC | Histone-like DNA-binding protein which is capable of wrapping DNA to stabilize it, and thus to prevent its denaturation under extreme environmental conditions (By similarity).                                                     |
| N | Q89B22 | DE | DNA-binding protein HU;                                                                                                                                                                                                             |
| N | Q89B22 | DR | chromosome condensation                                                                                                                                                                                                             |
| N | Q89B30 | CC | This protein is required for chromosomal replication                                                                                                                                                                                |
| N | Q89B30 | CC | It forms, in concert with dnaB protein and other prepriming proteins dnaT, N, N', N'' a prepriming protein complex on the specific site of the template DNA recognized by protein N' (By similarity).                               |
| N | Q89B30 | DE | DNA replication protein dnaC;                                                                                                                                                                                                       |
| N | Q89B30 | DR | DNA replication, synthesis of RNA primer                                                                                                                                                                                            |
| N | Q89B30 | DR | nucleoside-triphosphatase activity                                                                                                                                                                                                  |
| N | Q89DI7 | CC | Riboflavin synthase is a bifunctional enzyme complex catalyzing the formation of riboflavin from 5-amino-6-(1'-D)- ribityl-amino-2,4(1H,3H)-pyrimidinedione and L-3,4-dihydroxy-2- butanone-4-phosphate via 6,7-dimethyl-8-lumazine |
| N | Q89DI7 | CC | The beta subunit catalyzes the condensation of 5-amino-6-(1'-D)-ribityl-amino-2,4(1H,3H)-pyrimidinedione with L-3,4-dihydroxy-2-butanone-4- phosphate yielding 6,7-dimethyl-8-lumazine (By similarity).                             |
| N | Q89DI7 | DE | 6,7-dimethyl-8-ribityllumazine synthase 2;                                                                                                                                                                                          |
| N | Q89DI7 | DE | DMRL synthase 2;                                                                                                                                                                                                                    |

|   |        |    |                                                                                                                                                                                                         |
|---|--------|----|---------------------------------------------------------------------------------------------------------------------------------------------------------------------------------------------------------|
| N | Q89DI7 | DE | Lumazine synthase 2;                                                                                                                                                                                    |
| N | Q89DI7 | DE | Riboflavin synthase 2 beta chain;                                                                                                                                                                       |
| N | Q89DI7 | DR | riboflavin biosynthetic process                                                                                                                                                                         |
| N | Q89DI7 | DR | riboflavin synthase activity                                                                                                                                                                            |
| N | Q89KE5 | DE | 30S ribosomal protein S9;                                                                                                                                                                               |
| N | Q89KE5 | DR | structural constituent of ribosome                                                                                                                                                                      |
| N | Q89KU5 | CC | Catalyzes the ATP-dependent amination of UTP to CTP with either L-glutamine or ammonia as the source of nitrogen (By similarity).                                                                       |
| N | Q89KU5 | DE | CTP synthase;                                                                                                                                                                                           |
| N | Q89KU5 | DE | CTP synthetase;                                                                                                                                                                                         |
| N | Q89KU5 | DE | UTP--ammonia ligase;                                                                                                                                                                                    |
| N | Q89KU5 | DR | CTP synthase activity                                                                                                                                                                                   |
| N | Q89KU5 | DR | glutamine metabolic process                                                                                                                                                                             |
| N | Q89KU5 | DR | pyrimidine nucleotide biosynthetic process                                                                                                                                                              |
| N | Q8AWA7 | DE | Keratin, type 1 cytoskeletal 11;                                                                                                                                                                        |
| N | Q8AWA7 | DE | Type I keratin 11;                                                                                                                                                                                      |
| N | Q8AWA7 | DR | structural molecule activity                                                                                                                                                                            |
| N | Q8B9L3 | CC | Involved in late/very late gene activation (By similarity).                                                                                                                                             |
| N | Q8B9L3 | DE | Late expression factor 11;                                                                                                                                                                              |
| N | Q8B9L3 | DR | viral infectious cycle                                                                                                                                                                                  |
| N | Q8BDG3 | CC | Minor protein of the capsid that localizes along the inner surface of the virion, within the central cavities beneath the L1 pentamers                                                                  |
| N | Q8BDG3 | CC | During virion assembly, encapsidates the genome by direct interaction with the viral DNA (By similarity).                                                                                               |
| N | Q8BDG3 | CC | Later on, promotes late gene expression by interacting with the viral E2 protein and by inhibiting its transcriptional activation functions                                                             |
| N | Q8BDG3 | CC | mediates the viral genome import into the nucleus through binding to host importin                                                                                                                      |
| N | Q8BDG3 | CC | Once the virion enters the host cell, escorts the genomic DNA into the nucleus, in particular by promoting virion endosomal escape                                                                      |
| N | Q8BDG3 | CC | Once within the nucleus, L2 localizes viral genomes to PML bodies in order to activate early gene expression for establishment of infection                                                             |
| N | Q8BDG3 | CC | plays a role in capsid stabilization through interaction with the major capsid protein L1                                                                                                               |
| N | Q8BDG3 | DE | Minor capsid protein L2;                                                                                                                                                                                |
| N | Q8BFR1 | DE | Zinc finger CCCH-type antiviral protein 1-like;                                                                                                                                                         |
| N | Q8BFR1 | DR | nucleic acid binding                                                                                                                                                                                    |
| N | Q8BFR1 | DR | zinc ion binding                                                                                                                                                                                        |
| N | Q8BGY4 | DE | Kelch-like protein 26;                                                                                                                                                                                  |
| N | Q8BH58 | CC | may be a allosteric regulator of serine/threonine- protein phosphatase 2A (PP2A)                                                                                                                        |
| N | Q8BH58 | CC | Inhibits catalytic activity of the PP2A(D) core complex in vitro                                                                                                                                        |
| N | Q8BH58 | CC | May play a role in the regulation of ATM/ATR signaling pathway controlling DNA replication and repair (By similarity).                                                                                  |
| N | Q8BH58 | CC | The PP2A(C):TIPRL complex does not show phosphatase activity                                                                                                                                            |
| N | Q8BH58 | DE | TIP41-like protein;                                                                                                                                                                                     |
| N | Q8BHS3 | CC | Involved in pre-mRNA splicing (Probable)                                                                                                                                                                |
| N | Q8BHS3 | CC | May translocate the cytosolic calcium-binding protein PDCD6 in the nucleus (By similarity).                                                                                                             |
| N | Q8BHS3 | DE | Pre-mRNA-splicing factor RBM22;                                                                                                                                                                         |
| N | Q8BHS3 | DE | RNA-binding motif protein 22;                                                                                                                                                                           |
| N | Q8BHS3 | DR | mRNA processing                                                                                                                                                                                         |
| N | Q8BHS3 | DR | nucleotide binding                                                                                                                                                                                      |
| N | Q8BHS3 | DR | zinc ion binding                                                                                                                                                                                        |
| N | Q8BHX3 | CC | Component of the chromosomal passenger complex (CPC), a complex that acts as a key regulator of mitosis                                                                                                 |
| N | Q8BHX3 | CC | In the complex, it may be required to direct the CPC to centromeric DNA                                                                                                                                 |
| N | Q8BHX3 | CC | Major effector of the TTK kinase in the control of attachment-error-correction and chromosome alignment (By similarity).                                                                                |
| N | Q8BHX3 | CC | The CPC complex has essential functions at the centromere in ensuring correct chromosome alignment and segregation and is required for chromatin-induced microtubule stabilization and spindle assembly |
| N | Q8BHX3 | DE | Cell division cycle-associated protein 8;                                                                                                                                                               |
| N | Q8BHX3 | DR | cell division                                                                                                                                                                                           |
| N | Q8BIF0 | CC | May function as a homophilic adhesion molecule                                                                                                                                                          |
| N | Q8BIF0 | CC | Does not seem to be involved in docking of leukocytes to the vessel wall or in lymphocyte diapedesis                                                                                                    |

|   |        |    |                                                                                                                                                      |
|---|--------|----|------------------------------------------------------------------------------------------------------------------------------------------------------|
| N | Q8BIF0 | CC | Functions in leukocyte-endothelial cell interactions during leukocyte extravasation, and in particular, at the diapedesis step                       |
| N | Q8BIF0 | CC | In PubMed:17344467 showed heterophilic aggregation.                                                                                                  |
| N | Q8BIF0 | DE | CD99 antigen-like protein 2;                                                                                                                         |
| N | Q8BIF0 | DE | MIC2-like protein 1;                                                                                                                                 |
| N | Q8BIF0 | DR | cell adhesion                                                                                                                                        |
| N | Q8BRM6 | DE | UPF0623 protein;                                                                                                                                     |
| N | Q8BRM6 | DR | protein binding                                                                                                                                      |
| N | Q8BRM6 | DR | spermatogenesis                                                                                                                                      |
| N | Q8BW49 | DE | TPR repeat protein 12;                                                                                                                               |
| N | Q8BW49 | DE | Tetratricopeptide repeat protein 12;                                                                                                                 |
| N | Q8BXQ2 | CC | Component of the GPI transamidase complex                                                                                                            |
| N | Q8BXQ2 | CC | Essential for transfer of GPI to proteins, particularly for formation of carbonyl intermediates (By similarity).                                     |
| N | Q8BXQ2 | DE | GPI transamidase component PIG-T;                                                                                                                    |
| N | Q8BXQ2 | DE | Neuronal development-associated protein 7;                                                                                                           |
| N | Q8BXQ2 | DE | Phosphatidylinositol-glycan biosynthesis class T protein;                                                                                            |
| N | Q8BXQ2 | DR | attachment of GPI anchor to protein                                                                                                                  |
| N | Q8BXQ2 | DR | neuron apoptosis                                                                                                                                     |
| N | Q8BXQ2 | DR | neuron differentiation                                                                                                                               |
| N | Q8BXZ1 | CC | Probable disulfide isomerase, which participates in the folding of proteins containing disulfide bonds                                               |
| N | Q8BXZ1 | CC | May act as a dithiol oxidase (By similarity).                                                                                                        |
| N | Q8BXZ1 | DE | Protein disulfide-isomerase TMX3;                                                                                                                    |
| N | Q8BXZ1 | DE | Thioredoxin domain-containing protein 10;                                                                                                            |
| N | Q8BXZ1 | DE | Thioredoxin-related transmembrane protein 3;                                                                                                         |
| N | Q8BXZ1 | DR | cell redox homeostasis                                                                                                                               |
| N | Q8BXZ1 | DR | electron carrier activity                                                                                                                            |
| N | Q8BXZ1 | DR | glycerol ether metabolic process                                                                                                                     |
| N | Q8BXZ1 | DR | protein disulfide isomerase activity                                                                                                                 |
| N | Q8BXZ1 | DR | protein disulfide oxidoreductase activity                                                                                                            |
| N | Q8C138 | DE | Uncharacterized protein C6orf105 homolog;                                                                                                            |
| N | Q8C3J5 | CC | Involved in cytoskeletal rearrangements required for lymphocyte migration in response of chemokines                                                  |
| N | Q8C3J5 | CC | Activates RAC1 and RAC2 small GTPases, probably by functioning as a guanine nucleotide exchange factor (GEF), which exchanges bound GDP for free GTP |
| N | Q8C3J5 | CC | May participate in IL2 transcriptional activation via the activation of RAC2.                                                                        |
| N | Q8C3J5 | DE | Dedicator of cytokinesis protein 2;                                                                                                                  |
| N | Q8C3J5 | DE | Protein Hch;                                                                                                                                         |
| N | Q8C3J5 | DR | GTPase binding                                                                                                                                       |
| N | Q8C3J5 | DR | Rac GTPase activator activity                                                                                                                        |
| N | Q8C3J5 | DR | Rac guanyl-nucleotide exchange factor activity                                                                                                       |
| N | Q8C3J5 | DR | T cell receptor binding                                                                                                                              |
| N | Q8C3J5 | DR | alpha-beta T cell proliferation                                                                                                                      |
| N | Q8C3J5 | DR | cytoskeleton organization                                                                                                                            |
| N | Q8C3J5 | DR | establishment of T cell polarity                                                                                                                     |
| N | Q8C3J5 | DR | immunological synapse formation                                                                                                                      |
| N | Q8C3J5 | DR | membrane raft polarization                                                                                                                           |
| N | Q8C3J5 | DR | negative thymic T cell selection                                                                                                                     |
| N | Q8C3J5 | DR | positive regulation of Rac protein signal transduction                                                                                               |
| N | Q8C3J5 | DR | positive thymic T cell selection                                                                                                                     |
| N | Q8C9A2 | DE | Putative endonuclease FLJ39025 homolog;                                                                                                              |
| N | Q8C9A2 | DR | endonuclease activity                                                                                                                                |
| N | Q8CBY3 | DE | Leukocyte receptor cluster member 8 homolog;                                                                                                         |
| N | Q8CEG8 | DE | Deubiquitinating enzyme 27;                                                                                                                          |
| N | Q8CEG8 | DE | Ubiquitin carboxyl-terminal hydrolase 27;                                                                                                            |
| N | Q8CEG8 | DE | Ubiquitin thiolesterase 27;                                                                                                                          |
| N | Q8CEG8 | DE | Ubiquitin-specific-processing protease 27;                                                                                                           |
| N | Q8CEG8 | DE | X-linked ubiquitin carboxyl-terminal hydrolase 27;                                                                                                   |
| N | Q8CEG8 | DR | cysteine-type peptidase activity                                                                                                                     |
| N | Q8CEG8 | DR | ubiquitin thiolesterase activity                                                                                                                     |
| N | Q8CEG8 | DR | ubiquitin-dependent protein catabolic process                                                                                                        |
| N | Q8CFU8 | DE | Diabetes and obesity-regulated protein;                                                                                                              |
| N | Q8CFU8 | DE | Tumor protein p53-inducible nuclear protein 2;                                                                                                       |

|   |        |    |                                                                                                                                                                                                                                        |
|---|--------|----|----------------------------------------------------------------------------------------------------------------------------------------------------------------------------------------------------------------------------------------|
| N | Q8CG48 | CC | Central component of the condensin complex, a complex required for conversion of interphase chromatin into mitotic-like condense chromosomes                                                                                           |
| N | Q8CG48 | CC | The condensin complex probably introduces positive supercoils into relaxed DNA in the presence of type I topoisomerases and converts nicked DNA into positive knotted forms in the presence of type II topoisomerases (By similarity). |
| N | Q8CG48 | DE | Chromosome-associated protein E;                                                                                                                                                                                                       |
| N | Q8CG48 | DE | FGF-inducible protein 16;                                                                                                                                                                                                              |
| N | Q8CG48 | DE | SMC protein 2;                                                                                                                                                                                                                         |
| N | Q8CG48 | DE | Structural maintenance of chromosomes protein 2;                                                                                                                                                                                       |
| N | Q8CG48 | DE | XCAP-E homolog;                                                                                                                                                                                                                        |
| N | Q8CG48 | DR | cell division                                                                                                                                                                                                                          |
| N | Q8CJ44 | CC | High-affinity sodium/citrate cotransporter that mediates citrate entry into cells                                                                                                                                                      |
| N | Q8CJ44 | CC | May facilitate the utilization of circulating citrate for the generation of metabolic energy and for the synthesis of fatty acids and cholesterol.                                                                                     |
| N | Q8CJ44 | CC | The transport process is electrogenic; it is the trivalent form of citrate rather than the divalent form that is recognized as a substrate                                                                                             |
| N | Q8CJ44 | DE | Na(+)/citrate cotransporter;                                                                                                                                                                                                           |
| N | Q8CJ44 | DE | Sodium-coupled citrate transporter;                                                                                                                                                                                                    |
| N | Q8CJ44 | DE | Sodium-dependent citrate transporter;                                                                                                                                                                                                  |
| N | Q8CJ44 | DE | Solute carrier family 13 member 5;                                                                                                                                                                                                     |
| N | Q8CJ44 | DR | citrate transmembrane transporter activity                                                                                                                                                                                             |
| N | Q8CJ44 | DR | sodium:dicarboxylate symporter activity                                                                                                                                                                                                |
| N | Q8CJ44 | DR | succinate transmembrane transporter activity                                                                                                                                                                                           |
| N | Q8CNJ9 | CC | Involved in saturated fatty acids biosynthesis.                                                                                                                                                                                        |
| N | Q8CNJ9 | DE | (3R)-hydroxymyristoyl ACP dehydrase;                                                                                                                                                                                                   |
| N | Q8CNJ9 | DE | (3R)-hydroxymyristoyl-[acyl-carrier-protein] dehydratase;                                                                                                                                                                              |
| N | Q8CNJ9 | DR | fatty acid biosynthetic process                                                                                                                                                                                                        |
| N | Q8CNJ9 | DR | hydro-lyase activity                                                                                                                                                                                                                   |
| N | Q8CNJ9 | DR | lipid A biosynthetic process                                                                                                                                                                                                           |
| N | Q8CR71 | CC | Catalyzes the reversible transfer of the terminal phosphate of ATP to form a long-chain polyphosphate (polyP).                                                                                                                         |
| N | Q8CR71 | DE | ATP-polyphosphate phosphotransferase;                                                                                                                                                                                                  |
| N | Q8CR71 | DE | Polyphosphate kinase;                                                                                                                                                                                                                  |
| N | Q8CR71 | DE | Polyphosphoric acid kinase;                                                                                                                                                                                                            |
| N | Q8CR71 | DR | polyphosphate biosynthetic process                                                                                                                                                                                                     |
| N | Q8CR71 | DR | polyphosphate kinase activity                                                                                                                                                                                                          |
| N | Q8CRG3 | CC | One of the primary rRNA binding proteins                                                                                                                                                                                               |
| N | Q8CRG3 | CC | It has been suggested to have peptidyltransferase activity, this is somewhat controversial                                                                                                                                             |
| N | Q8CRG3 | CC | Makes several contacts with the 16S rRNA in the 70S ribosome (By similarity).                                                                                                                                                          |
| N | Q8CRG3 | CC | Required for association of the 30S and 50S subunits to form the 70S ribosome, for tRNA binding and peptide bond formation                                                                                                             |
| N | Q8CRG3 | DE | 50S ribosomal protein L2;                                                                                                                                                                                                              |
| N | Q8CRG3 | DR | structural constituent of ribosome                                                                                                                                                                                                     |
| N | Q8CRG3 | DR | transferase activity                                                                                                                                                                                                                   |
| N | Q8CS62 | DE | UPF0173 metal-dependent hydrolase SE_1382;                                                                                                                                                                                             |
| N | Q8CS62 | DR | hydrolase activity                                                                                                                                                                                                                     |
| N | Q8CSQ2 | CC | Catalyzes the ATP-dependent phosphorylation of L- homoserine to L- homoserine phosphate (By similarity).                                                                                                                               |
| N | Q8CSQ2 | DE | Homoserine kinase;                                                                                                                                                                                                                     |
| N | Q8CSQ2 | DR | homoserine kinase activity                                                                                                                                                                                                             |
| N | Q8CSQ2 | DR | threonine biosynthetic process                                                                                                                                                                                                         |
| N | Q8CTU2 | DE | Serine acetyltransferase;                                                                                                                                                                                                              |
| N | Q8CTU2 | DR | cysteine biosynthetic process from serine                                                                                                                                                                                              |
| N | Q8CTU2 | DR | serine O-acetyltransferase activity                                                                                                                                                                                                    |
| N | Q8CWN3 | DE | 50S ribosomal protein L32;                                                                                                                                                                                                             |
| N | Q8CWN3 | DR | structural constituent of ribosome                                                                                                                                                                                                     |
| N | Q8CX20 | CC | Formation of pseudouridine at positions 38, 39 and 40 in the anticodon stem and loop of transfer RNAs (By similarity).                                                                                                                 |
| N | Q8CX20 | DE | tRNA pseudouridine synthase A;                                                                                                                                                                                                         |
| N | Q8CX20 | DE | tRNA pseudouridylylate synthase I;                                                                                                                                                                                                     |
| N | Q8CX20 | DE | tRNA-uridine isomerase I;                                                                                                                                                                                                              |
| N | Q8CX20 | DR | pseudouridine synthase activity                                                                                                                                                                                                        |
| N | Q8CX20 | DR | pseudouridine synthesis                                                                                                                                                                                                                |
| N | Q8CX20 | DR | tRNA processing                                                                                                                                                                                                                        |
| N | Q8CXB4 | CC | The UVABC repair system catalyzes the recognition and processing of DNA lesions                                                                                                                                                        |

|   |        |    |                                                                                                                                                          |
|---|--------|----|----------------------------------------------------------------------------------------------------------------------------------------------------------|
| N | Q8CXB4 | CC | The N-terminal half is responsible for the 3' incision and the C-terminal half is responsible for the 5' incision (By similarity).                       |
| N | Q8CXB4 | CC | UvrC both incises the 5' and 3' sides of the lesion                                                                                                      |
| N | Q8CXB4 | DE | Excinuclease ABC subunit C;                                                                                                                              |
| N | Q8CXB4 | DE | Protein uvrC;                                                                                                                                            |
| N | Q8CXB4 | DE | UvrABC system protein C;                                                                                                                                 |
| N | Q8CXB4 | DR | excinuclease ABC activity                                                                                                                                |
| N | Q8CXB4 | DR | nucleotide-excision repair                                                                                                                               |
| N | Q8CXQ7 | CC | Prevents misfolding and promotes the refolding and proper assembly of unfolded polypeptides generated under stress conditions (By similarity).           |
| N | Q8CXQ7 | DE | 60 kDa chaperonin;                                                                                                                                       |
| N | Q8CXQ7 | DE | GroEL protein;                                                                                                                                           |
| N | Q8CXQ7 | DE | Protein Cpn60;                                                                                                                                           |
| N | Q8CXQ7 | DR | protein refolding                                                                                                                                        |
| N | Q8CY46 | CC | Formation of pseudouridine at positions 38, 39 and 40 in the anticodon stem and loop of transfer RNAs (By similarity).                                   |
| N | Q8CY46 | DE | tRNA pseudouridine synthase A;                                                                                                                           |
| N | Q8CY46 | DE | tRNA pseudouridylation synthase I;                                                                                                                       |
| N | Q8CY46 | DE | tRNA-uridine isomerase I;                                                                                                                                |
| N | Q8CY46 | DR | pseudouridine synthase activity                                                                                                                          |
| N | Q8CY46 | DR | pseudouridine synthesis                                                                                                                                  |
| N | Q8CY46 | DR | tRNA processing                                                                                                                                          |
| N | Q8D201 | CC | One of two assembly initiator proteins, it binds directly to the 5'-end of the 23S rRNA, where it nucleates assembly of the 50S subunit (By similarity). |
| N | Q8D201 | DE | 50S ribosomal protein L24;                                                                                                                               |
| N | Q8D201 | DR | structural constituent of ribosome                                                                                                                       |
| N | Q8D3A0 | CC | Part of the ABC transporter complex LolCDE involved in the translocation of lipoproteins, in an ATP-dependent manner (By similarity).                    |
| N | Q8D3A0 | DE | Lipoprotein-releasing system ATP-binding protein LolD;                                                                                                   |
| N | Q8D3A0 | DR | ATPase activity                                                                                                                                          |
| N | Q8D3A0 | DR | lipoprotein transporter activity                                                                                                                         |
| N | Q8D921 | CC | Catalyzes the synthesis of alpha-ribazole-5'-phosphate from nicotinate mononucleotide (NAMN) and 5,6- dimethylbenzimidazole (DMB).                       |
| N | Q8D921 | DE | N(1)-alpha-phosphoribosyltransferase;                                                                                                                    |
| N | Q8D921 | DE | NN:DBI PRT;                                                                                                                                              |
| N | Q8D921 | DE | Nicotinate-nucleotide--dimethylbenzimidazole phosphoribosyltransferase;                                                                                  |
| N | Q8D921 | DR | cobalamin biosynthetic process                                                                                                                           |
| N | Q8D921 | DR | nicotinate-nucleotide-dimethylbenzimidazole phosphoribosyltransferase activity                                                                           |
| N | Q8D921 | DR | nucleoside biosynthetic process                                                                                                                          |
| N | Q8DB42 | DE | 5-enolpyruvylshikimate-3-phosphate phospholyase;                                                                                                         |
| N | Q8DB42 | DE | Chorismate synthase;                                                                                                                                     |
| N | Q8DB42 | DR | aromatic amino acid family biosynthetic process                                                                                                          |
| N | Q8DB42 | DR | chorismate synthase activity                                                                                                                             |
| N | Q8DBW4 | CC | Catalyzes the conversion of glucosamine-6-phosphate to glucosamine-1-phosphate (By similarity).                                                          |
| N | Q8DBW4 | DE | Phosphoglucosamine mutase;                                                                                                                               |
| N | Q8DBW4 | DR | carbohydrate metabolic process                                                                                                                           |
| N | Q8DBW4 | DR | magnesium ion binding                                                                                                                                    |
| N | Q8DBW4 | DR | phosphoglucosamine mutase activity                                                                                                                       |
| N | Q8DC50 | CC | Modulates recA activity (By similarity).                                                                                                                 |
| N | Q8DC50 | DE | Regulatory protein recX;                                                                                                                                 |
| N | Q8DC50 | DR | regulation of DNA repair                                                                                                                                 |
| N | Q8DCK7 | DE | Glucose-6-phosphate isomerase;                                                                                                                           |
| N | Q8DCK7 | DE | Phosphoglucose isomerase;                                                                                                                                |
| N | Q8DCK7 | DE | Phosphohexose isomerase;                                                                                                                                 |
| N | Q8DCK7 | DR | gluconeogenesis                                                                                                                                          |
| N | Q8DCK7 | DR | glucose-6-phosphate isomerase activity                                                                                                                   |
| N | Q8DCV6 | CC | 3'-to-5' exoribonuclease specific for small oligoribonucleotides (By similarity).                                                                        |
| N | Q8DCV6 | DE | Oligoribonuclease;                                                                                                                                       |
| N | Q8DCV6 | DR | exonuclease activity                                                                                                                                     |
| N | Q8DCV6 | DR | nucleic acid binding                                                                                                                                     |
| N | Q8DDK1 | CC | Could be part of a sulfur-relay system (By similarity).                                                                                                  |
| N | Q8DDK1 | DE | Sulfurtransferase tusA homolog;                                                                                                                          |
| N | Q8DDK1 | DR | sulfurtransferase activity                                                                                                                               |
| N | Q8DDK1 | DR | tRNA processing                                                                                                                                          |

|   |        |    |                                                                                                                                                                                                               |
|---|--------|----|---------------------------------------------------------------------------------------------------------------------------------------------------------------------------------------------------------------|
| N | Q8DG25 | CC | Involved in protein export                                                                                                                                                                                    |
| N | Q8DG25 | CC | Acts as a chaperone by maintaining the newly synthesized protein in an open conformation (By similarity).                                                                                                     |
| N | Q8DG25 | DE | Trigger factor;                                                                                                                                                                                               |
| N | Q8DG25 | DR | cell division                                                                                                                                                                                                 |
| N | Q8DG25 | DR | peptidyl-prolyl cis-trans isomerase activity                                                                                                                                                                  |
| N | Q8DG25 | DR | protein folding                                                                                                                                                                                               |
| N | Q8DG25 | DR | protein transport                                                                                                                                                                                             |
| N | Q8DMA5 | DE | 1-(5-phosphoribosyl)-5-[(5-phosphoribosylamino)methylideneamino] imidazole-4-carboxamide isomerase;                                                                                                           |
| N | Q8DMA5 | DE | Phosphoribosylformimino-5-aminoimidazole carboxamide ribotide isomerase;                                                                                                                                      |
| N | Q8DMA5 | DR | 1-(5-phosphoribosyl)-5-[(5-phosphoribosylamino)methylideneamino]imidazole-4-carboxamide isomerase activity                                                                                                    |
| N | Q8DMA5 | DR | histidine biosynthetic process                                                                                                                                                                                |
| N | Q8DNL1 | CC | Converts the preformed base xanthine, a product of nucleic acid breakdown, to xanthosine 5'-monophosphate (XMP), so it can be reused for RNA or DNA synthesis (By similarity).                                |
| N | Q8DNL1 | DE | Xanthine phosphoribosyltransferase;                                                                                                                                                                           |
| N | Q8DNL1 | DR | purine ribonucleoside salvage                                                                                                                                                                                 |
| N | Q8DNL1 | DR | xanthine metabolic process                                                                                                                                                                                    |
| N | Q8DNL1 | DR | xanthine phosphoribosyltransferase activity                                                                                                                                                                   |
| N | Q8DS31 | CC | Binds to the 23S rRNA (By similarity).                                                                                                                                                                        |
| N | Q8DS31 | DE | 50S ribosomal protein L15;                                                                                                                                                                                    |
| N | Q8DS31 | DR | structural constituent of ribosome                                                                                                                                                                            |
| N | Q8DSY0 | CC | Binds directly to 23S rRNA                                                                                                                                                                                    |
| N | Q8DSY0 | CC | The L1 stalk is quite mobile in the ribosome, and is involved in E site tRNA release (By similarity).                                                                                                         |
| N | Q8DSY0 | DE | 50S ribosomal protein L1;                                                                                                                                                                                     |
| N | Q8DSY0 | DR | RNA processing                                                                                                                                                                                                |
| N | Q8DSY0 | DR | regulation of translation                                                                                                                                                                                     |
| N | Q8DSY0 | DR | structural constituent of ribosome                                                                                                                                                                            |
| N | Q8DUK7 | CC | Catalyzes the ATP-dependent conversion of 7-carboxy-7- deazaguanine (CDG) to 7-cyano-7-deazaguanine (preQ(0)) (By similarity).                                                                                |
| N | Q8DUK7 | DE | 7-cyano-7-carbaguanine synthase;                                                                                                                                                                              |
| N | Q8DUK7 | DE | 7-cyano-7-deazaguanine synthase;                                                                                                                                                                              |
| N | Q8DUK7 | DE | PreQ(0) synthase;                                                                                                                                                                                             |
| N | Q8DUK7 | DE | Queuosine biosynthesis protein queC;                                                                                                                                                                          |
| N | Q8DUK7 | DR | ligase activity                                                                                                                                                                                               |
| N | Q8DUK7 | DR | metal ion binding                                                                                                                                                                                             |
| N | Q8DUK7 | DR | queuosine biosynthetic process                                                                                                                                                                                |
| N | Q8DWW6 | CC | The ruvA-ruvB complex in the presence of ATP renatures cruciform structure in supercoiled DNA with palindromic sequence, indicating that it may promote strand exchange reactions in homologous recombination |
| N | Q8DWW6 | CC | RuvA stimulates, in the presence of DNA, the weak ATPase activity of ruvB (By similarity).                                                                                                                    |
| N | Q8DWW6 | CC | RuvAB is an helicase that mediates the Holliday junction migration by localized denaturation and reannealing                                                                                                  |
| N | Q8DWW6 | DE | Holliday junction ATP-dependent DNA helicase ruvA;                                                                                                                                                            |
| N | Q8DWW6 | DR | DNA recombination                                                                                                                                                                                             |
| N | Q8DWW6 | DR | four-way junction helicase activity                                                                                                                                                                           |
| N | Q8DY25 | CC | Furnishes a means for formation of correctly charged Gln-tRNA(Gln) through the transamidation of misacylated Glu- tRNA(Gln) in organisms which lack glutaminyI-tRNA synthetase                                |
| N | Q8DY25 | CC | The reaction takes place in the presence of glutamine and ATP through an activated gamma-phospho-Glu-tRNA(Gln) (By similarity).                                                                               |
| N | Q8DY25 | DE | Glu-ADT subunit A;                                                                                                                                                                                            |
| N | Q8DY25 | DE | Glutamyl-tRNA(Gln) amidotransferase subunit A;                                                                                                                                                                |
| N | Q8DY25 | DR | carbon-nitrogen ligase activity, with glutamine as amido-N-donor                                                                                                                                              |
| N | Q8DZY3 | DE | L-lactate dehydrogenase;                                                                                                                                                                                      |
| N | Q8DZY3 | DR | L-lactate dehydrogenase activity                                                                                                                                                                              |
| N | Q8DZY3 | DR | oxidation-reduction process                                                                                                                                                                                   |
| N | Q8E3W3 | DE | UPF0161 protein gbs1641;                                                                                                                                                                                      |
| N | Q8E720 | CC | Involved in saturated fatty acids biosynthesis.                                                                                                                                                               |
| N | Q8E720 | DE | (3R)-hydroxymyristoyl ACP dehydrase;                                                                                                                                                                          |
| N | Q8E720 | DE | (3R)-hydroxymyristoyl-[acyl-carrier-protein] dehydratase;                                                                                                                                                     |



|   |        |    |                                                                                                                                                                                                               |
|---|--------|----|---------------------------------------------------------------------------------------------------------------------------------------------------------------------------------------------------------------|
| N | Q8E720 | DR | fatty acid biosynthetic process                                                                                                                                                                               |
| N | Q8E720 | DR | hydro-lyase activity                                                                                                                                                                                          |
| N | Q8E720 | DR | lipid A biosynthetic process                                                                                                                                                                                  |
| N | Q8E942 | CC | Together with moaA, is involved in the conversion of a guanosine derivative (5'-GTP) into molybdopterin precursor Z (By similarity).                                                                          |
| N | Q8E942 | DE | Molybdenum cofactor biosynthesis protein C;                                                                                                                                                                   |
| N | Q8E942 | DR | Mo-molybdopterin cofactor biosynthetic process                                                                                                                                                                |
| N | Q8E9P6 | CC | Cell wall formation                                                                                                                                                                                           |
| N | Q8E9P6 | CC | Catalyzes the addition of glutamate to the nucleotide precursor UDP-N-acetylmuramoyl-L-alanine (UMA) (By similarity).                                                                                         |
| N | Q8E9P6 | DE | D-glutamic acid-adding enzyme;                                                                                                                                                                                |
| N | Q8E9P6 | DE | UDP-N-acetylmuramoyl-L-alanyl-D-glutamate synthetase;                                                                                                                                                         |
| N | Q8E9P6 | DE | UDP-N-acetylmuramoylalanine--D-glutamate ligase;                                                                                                                                                              |
| N | Q8E9P6 | DR | UDP-N-acetylmuramoylalanine-D-glutamate ligase activity                                                                                                                                                       |
| N | Q8E9P6 | DR | cell division                                                                                                                                                                                                 |
| N | Q8E9P6 | DR | cellular cell wall organization                                                                                                                                                                               |
| N | Q8E9P6 | DR | peptidoglycan biosynthetic process                                                                                                                                                                            |
| N | Q8E9P6 | DR | regulation of cell shape                                                                                                                                                                                      |
| N | Q8EBH1 | DE | Glucose-6-phosphate isomerase;                                                                                                                                                                                |
| N | Q8EBH1 | DE | Phosphoglucose isomerase;                                                                                                                                                                                     |
| N | Q8EBH1 | DE | Phosphohexose isomerase;                                                                                                                                                                                      |
| N | Q8EBH1 | DR | gluconeogenesis                                                                                                                                                                                               |
| N | Q8EBH1 | DR | glucose-6-phosphate isomerase activity                                                                                                                                                                        |
| N | Q8EEF3 | CC | The ruvA-ruvB complex in the presence of ATP renatures cruciform structure in supercoiled DNA with palindromic sequence, indicating that it may promote strand exchange reactions in homologous recombination |
| N | Q8EEF3 | CC | RuvAB is an helicase that mediates the Holliday junction migration by localized denaturation and reannealing (By similarity).                                                                                 |
| N | Q8EEF3 | DE | Holliday junction ATP-dependent DNA helicase ruvB;                                                                                                                                                            |
| N | Q8EEF3 | DR | DNA recombination                                                                                                                                                                                             |
| N | Q8EEF3 | DR | four-way junction helicase activity                                                                                                                                                                           |
| N | Q8EFB1 | CC | Catalyzes the sequential NAD-dependent oxidations of L- histidinol to L-histidinaldehyde and then to L-histidine (By similarity).                                                                             |
| N | Q8EFB1 | DE | Histidinol dehydrogenase;                                                                                                                                                                                     |
| N | Q8EFB1 | DR | histidine biosynthetic process                                                                                                                                                                                |
| N | Q8EFB1 | DR | histidinol dehydrogenase activity                                                                                                                                                                             |
| N | Q8EFB1 | DR | oxidation-reduction process                                                                                                                                                                                   |
| N | Q8EFB1 | DR | zinc ion binding                                                                                                                                                                                              |
| N | Q8EFB2 | DE | Histidinol-phosphate aminotransferase;                                                                                                                                                                        |
| N | Q8EFB2 | DE | Imidazole acetol-phosphate transaminase;                                                                                                                                                                      |
| N | Q8EFB2 | DR | histidine biosynthetic process                                                                                                                                                                                |
| N | Q8EFB2 | DR | histidinol-phosphate transaminase activity                                                                                                                                                                    |
| N | Q8EFB2 | DR | pyridoxal phosphate binding                                                                                                                                                                                   |
| N | Q8EKX1 | CC | Binds to the 23S rRNA (By similarity).                                                                                                                                                                        |
| N | Q8EKX1 | DE | 50S ribosomal protein L9;                                                                                                                                                                                     |
| N | Q8EKX1 | DR | structural constituent of ribosome                                                                                                                                                                            |
| N | Q8EL25 | DE | UPF0324 membrane protein OB3406;                                                                                                                                                                              |
| N | Q8EQS7 | CC | DNA motor protein, which is both required to move DNA out of the region of the septum during cell division and for the septum formation                                                                       |
| N | Q8EQS7 | CC | Tracks DNA in an ATP-dependent manner by generating positive supercoils in front of it and negative supercoils behind it (By similarity).                                                                     |
| N | Q8EQS7 | DE | DNA translocase ftsK;                                                                                                                                                                                         |
| N | Q8EQS7 | DR | cell division                                                                                                                                                                                                 |
| N | Q8EQS7 | DR | chromosome segregation                                                                                                                                                                                        |
| N | Q8EQS7 | DR | nucleoside-triphosphatase activity                                                                                                                                                                            |
| N | Q8ETX2 | CC | One of two assembly initiator proteins, it binds directly to the 5'-end of the 23S rRNA, where it nucleates assembly of the 50S subunit (By similarity).                                                      |
| N | Q8ETX2 | DE | 50S ribosomal protein L24;                                                                                                                                                                                    |
| N | Q8ETX2 | DR | structural constituent of ribosome                                                                                                                                                                            |
| N | Q8EWT2 | CC | Endonuclease IV plays a role in DNA repair                                                                                                                                                                    |
| N | Q8EWT2 | CC | It cleaves phosphodiester bonds at apurinic or apyrimidinic sites (AP sites) to produce new 5'-ends that are base-free deoxyribose 5-phosphate residues                                                       |
| N | Q8EWT2 | CC | It preferentially attacks modified AP sites created by bleomycin and neocarzinostatin (By similarity).                                                                                                        |
| N | Q8EWT2 | DE | Endodeoxyribonuclease IV;                                                                                                                                                                                     |

|   |        |    |                                                                                                                                                       |
|---|--------|----|-------------------------------------------------------------------------------------------------------------------------------------------------------|
| N | Q8EWT2 | DE | Endonuclease IV;                                                                                                                                      |
| N | Q8EWT2 | DE | Probable endonuclease 4;                                                                                                                              |
| N | Q8EWT2 | DR | deoxyribonuclease IV (phage-T4-induced) activity                                                                                                      |
| N | Q8EWT2 | DR | zinc ion binding                                                                                                                                      |
| N | Q8F0T5 | DE | UPF0234 protein LA_3406;                                                                                                                              |
| N | Q8FBS5 | CC | Functions as an ATPase                                                                                                                                |
| N | Q8FBS5 | CC | may play a role in metal insertion (metal-chaperase) or as a chaperone (By similarity)                                                                |
| N | Q8FBS5 | DE | ATPase ravA;                                                                                                                                          |
| N | Q8FBS5 | DE | Regulatory ATPase variant A;                                                                                                                          |
| N | Q8FBS5 | DR | ATPase activity                                                                                                                                       |
| N | Q8FBS5 | DR | hydrolase activity, acting on acid anhydrides, catalyzing transmembrane movement of substances                                                        |
| N | Q8FE69 | DE | UPF0267 protein yqfB;                                                                                                                                 |
| N | Q8FGL1 | DE | Flagellar hook-basal body complex protein FliE;                                                                                                       |
| N | Q8FGL1 | DR | ciliary or flagellar motility                                                                                                                         |
| N | Q8FGL1 | DR | motor activity                                                                                                                                        |
| N | Q8FGL1 | DR | structural molecule activity                                                                                                                          |
| N | Q8FLA3 | CC | Required for anaerobic carnitine reduction                                                                                                            |
| N | Q8FLA3 | CC | May bring reductant to CaiA (By similarity).                                                                                                          |
| N | Q8FLA3 | DE | Protein fixA;                                                                                                                                         |
| N | Q8FLA3 | DR | electron carrier activity                                                                                                                             |
| N | Q8FLA3 | DR | electron transport chain                                                                                                                              |
| N | Q8FNT1 | DE | Protein MraZ;                                                                                                                                         |
| N | Q8FS75 | CC | Binds 23S rRNA and is also seen to make contacts with the A and possibly P site tRNAs (By similarity).                                                |
| N | Q8FS75 | DE | 50S ribosomal protein L16;                                                                                                                            |
| N | Q8FS75 | DR | structural constituent of ribosome                                                                                                                    |
| N | Q8FSD6 | CC | Catalyzes the decarboxylation of four acetate groups of uroporphyrinogen-III to yield coproporphyrinogen-III (By similarity).                         |
| N | Q8FSD6 | DE | Uroporphyrinogen decarboxylase;                                                                                                                       |
| N | Q8FSD6 | DR | porphyrin biosynthetic process                                                                                                                        |
| N | Q8FSD6 | DR | uroporphyrinogen decarboxylase activity                                                                                                               |
| N | Q8FSJ0 | CC | Catalyzes a reversible aldol reaction between acetaldheyde and D-glyceraldehyde 3-phosphate to generate 2-deoxy- D-ribose 5-phosphate (By similarity) |
| N | Q8FSJ0 | DE | 2-deoxy-D-ribose 5-phosphate aldolase;                                                                                                                |
| N | Q8FSJ0 | DE | Deoxyriboaldolase;                                                                                                                                    |
| N | Q8FSJ0 | DE | Deoxyribose-phosphate aldolase;                                                                                                                       |
| N | Q8FSJ0 | DE | Phosphodeoxyriboaldolase;                                                                                                                             |
| N | Q8FSJ0 | DR | deoxyribonucleotide catabolic process                                                                                                                 |
| N | Q8FSJ0 | DR | deoxyribose-phosphate aldolase activity                                                                                                               |
| N | Q8FV25 | DE | 2,3,4,5-tetrahydropyridine-2,6-dicarboxylate N-succinyltransferase;                                                                                   |
| N | Q8FV25 | DE | THDP succinyltransferase;                                                                                                                             |
| N | Q8FV25 | DE | THP succinyltransferase;                                                                                                                              |
| N | Q8FV25 | DE | Tetrahydrodipicolinate N-succinyltransferase;                                                                                                         |
| N | Q8FV25 | DE | Tetrahydropicolinate succinylase;                                                                                                                     |
| N | Q8FV25 | DR | 2,3,4,5-tetrahydropyridine-2,6-dicarboxylate N-succinyltransferase activity                                                                           |
| N | Q8FV25 | DR | diaminopimelate biosynthetic process                                                                                                                  |
| N | Q8FYW3 | CC | Catalyzes the conversion of N5-carboxyaminoimidazole ribonucleotide (N5-CAIR) to 4-carboxy-5-aminoimidazole ribonucleotide (CAIR) (By similarity).    |
| N | Q8FYW3 | DE | 5-(carboxyamino)imidazole ribonucleotide mutase;                                                                                                      |
| N | Q8FYW3 | DE | N5-CAIR mutase;                                                                                                                                       |
| N | Q8FYW3 | DE | N5-carboxyaminoimidazole ribonucleotide mutase;                                                                                                       |
| N | Q8FYW3 | DR | 'de novo' IMP biosynthetic process                                                                                                                    |
| N | Q8FYW3 | DR | 5-(carboxyamino)imidazole ribonucleotide mutase activity                                                                                              |
| N | Q8FYW3 | DR | phosphoribosylaminoimidazole carboxylase activity                                                                                                     |
| N | Q8FZP5 | CC | Cell wall formation (By similarity).                                                                                                                  |
| N | Q8FZP5 | DE | D-Ala-D-Ala ligase B;                                                                                                                                 |
| N | Q8FZP5 | DE | D-alanine--D-alanine ligase B;                                                                                                                        |
| N | Q8FZP5 | DE | D-alanylalanine synthetase B;                                                                                                                         |
| N | Q8FZP5 | DR | D-alanine-D-alanine ligase activity                                                                                                                   |
| N | Q8FZP5 | DR | cellular cell wall organization                                                                                                                       |
| N | Q8FZP5 | DR | metal ion binding                                                                                                                                     |
| N | Q8FZP5 | DR | peptidoglycan biosynthetic process                                                                                                                    |
| N | Q8FZP5 | DR | regulation of cell shape                                                                                                                              |
| N | Q8G075 | CC | Catalyzes the GTP-dependent ribosomal translocation step during translation elongation                                                                |

|   |        |    |                                                                                                                                                                                                                                                                                                                                                                                      |
|---|--------|----|--------------------------------------------------------------------------------------------------------------------------------------------------------------------------------------------------------------------------------------------------------------------------------------------------------------------------------------------------------------------------------------|
| N | Q8G075 | CC | Catalyzes the coordinated movement of the two tRNA molecules, the mRNA and conformational changes in the ribosome (By similarity).                                                                                                                                                                                                                                                   |
| N | Q8G075 | CC | During this step, the ribosome changes from the pre-translocational (PRE) to the post- translocational (POST) state as the newly formed A-site-bound peptidyl-tRNA and P-site-bound deacylated tRNA move to the P and E sites, respectively                                                                                                                                          |
| N | Q8G075 | DE | Elongation factor G;                                                                                                                                                                                                                                                                                                                                                                 |
| N | Q8G075 | DR | GTPase activity                                                                                                                                                                                                                                                                                                                                                                      |
| N | Q8G075 | DR | translation elongation factor activity                                                                                                                                                                                                                                                                                                                                               |
| N | Q8G308 | CC | This protein specifically catalyzes the removal of signal peptides from prolipoproteins (By similarity).                                                                                                                                                                                                                                                                             |
| N | Q8G308 | DE | Lipoprotein signal peptidase;                                                                                                                                                                                                                                                                                                                                                        |
| N | Q8G308 | DE | Prolipoprotein signal peptidase;                                                                                                                                                                                                                                                                                                                                                     |
| N | Q8G308 | DE | Signal peptidase II;                                                                                                                                                                                                                                                                                                                                                                 |
| N | Q8G308 | DR | aspartic-type endopeptidase activity                                                                                                                                                                                                                                                                                                                                                 |
| N | Q8G312 | CC | Modifies, by uridylylation or deuridylylation the PII (glnB) regulatory protein (By similarity).                                                                                                                                                                                                                                                                                     |
| N | Q8G312 | DE | PII uridylyl-transferase;                                                                                                                                                                                                                                                                                                                                                            |
| N | Q8G312 | DE | Uridylyl-removing enzyme;                                                                                                                                                                                                                                                                                                                                                            |
| N | Q8G312 | DE | [Protein-PII] uridylyltransferase;                                                                                                                                                                                                                                                                                                                                                   |
| N | Q8G312 | DR | [protein-PII] uridylyltransferase activity                                                                                                                                                                                                                                                                                                                                           |
| N | Q8G312 | DR | amino acid binding                                                                                                                                                                                                                                                                                                                                                                   |
| N | Q8G312 | DR | nitrogen compound metabolic process                                                                                                                                                                                                                                                                                                                                                  |
| N | Q8G4G1 | DE | Probable serine/threonine-protein kinase pknA2;                                                                                                                                                                                                                                                                                                                                      |
| N | Q8G4G1 | DR | penicillin binding                                                                                                                                                                                                                                                                                                                                                                   |
| N | Q8G4G1 | DR | protein phosphorylation                                                                                                                                                                                                                                                                                                                                                              |
| N | Q8G4G1 | DR | protein serine/threonine kinase activity                                                                                                                                                                                                                                                                                                                                             |
| N | Q8G816 | DE | Carbamoyl-phosphate synthase small chain;                                                                                                                                                                                                                                                                                                                                            |
| N | Q8G816 | DE | Carbamoyl-phosphate synthetase glutamine chain;                                                                                                                                                                                                                                                                                                                                      |
| N | Q8G816 | DR | arginine biosynthetic process                                                                                                                                                                                                                                                                                                                                                        |
| N | Q8G816 | DR | carbamoyl-phosphate synthase (glutamine-hydrolyzing) activity                                                                                                                                                                                                                                                                                                                        |
| N | Q8G816 | DR | glutamine metabolic process                                                                                                                                                                                                                                                                                                                                                          |
| N | Q8G816 | DR | pyrimidine nucleotide biosynthetic process                                                                                                                                                                                                                                                                                                                                           |
| N | Q8GC81 | CC | Specifically catalyzes the cleavage of the D-lactyl ether substituent of MurNAc 6-phosphate, producing GlcNAc 6- phosphate and D-lactate together with AnmK, is also required for the utilization of anhydro-N-acetylmuramic acid (anhMurNAc) either imported from the medium or derived from its own cell wall murein, and thus plays a role in cell wall recycling (By similarity) |
| N | Q8GC81 | CC |                                                                                                                                                                                                                                                                                                                                                                                      |
| N | Q8GC81 | DE | MurNAc-6-P etherase;                                                                                                                                                                                                                                                                                                                                                                 |
| N | Q8GC81 | DE | N-acetylmuramic acid 6-phosphate etherase;                                                                                                                                                                                                                                                                                                                                           |
| N | Q8GC81 | DE | N-acetylmuramic acid 6-phosphate hydrolase;                                                                                                                                                                                                                                                                                                                                          |
| N | Q8GC81 | DE | N-acetylmuramic acid 6-phosphate lyase;                                                                                                                                                                                                                                                                                                                                              |
| N | Q8GC81 | DR | amino sugar catabolic process                                                                                                                                                                                                                                                                                                                                                        |
| N | Q8GC81 | DR | hydro-lyase activity                                                                                                                                                                                                                                                                                                                                                                 |
| N | Q8GC81 | DR | sugar binding                                                                                                                                                                                                                                                                                                                                                                        |
| N | Q8GPG1 | CC | May transfer electrons to the iron-sulfur centers of ddhB.                                                                                                                                                                                                                                                                                                                           |
| N | Q8GPG1 | DE | DMS DH heme subunit;                                                                                                                                                                                                                                                                                                                                                                 |
| N | Q8GPG1 | DE | DMS DH subunit gamma;                                                                                                                                                                                                                                                                                                                                                                |
| N | Q8GPG1 | DE | Dimethylsulfide dehydrogenase subunit gamma;                                                                                                                                                                                                                                                                                                                                         |
| N | Q8GPG1 | DE | Dimethylsulfide heme subunit;                                                                                                                                                                                                                                                                                                                                                        |
| N | Q8GPG1 | DR | electron transport chain                                                                                                                                                                                                                                                                                                                                                             |
| N | Q8GPI4 | CC | Antibacterial peptide active against a broad range of lactic acid bacteria, L.monocytogenes and many epidemiologically unrelated strains of S.aureus involved in bovine mastitis.                                                                                                                                                                                                    |
| N | Q8GPI4 | DE | Bacteriocin aureocin A53;                                                                                                                                                                                                                                                                                                                                                            |
| N | Q8GPI4 | DR | defense response to bacterium                                                                                                                                                                                                                                                                                                                                                        |
| N | Q8GY63 | CC | Converts adenosine 3'-phosphate 5'-phosphosulfate (PAPS) to adenosine 5'-phosphosulfate (APS) and 3'(2')-phosphoadenosine 5'- phosphate (PAP) to AMP (By similarity)                                                                                                                                                                                                                 |
| N | Q8GY63 | CC | Is also able to hydrolyze inositol 1,4-bisphosphate (By similarity).                                                                                                                                                                                                                                                                                                                 |
| N | Q8GY63 | DE | 3'(2'),5'-bisphosphate nucleotidase 3;                                                                                                                                                                                                                                                                                                                                               |
| N | Q8GY63 | DE | 3'(2'),5'-bisphosphonucleoside 3'(2')-phosphohydrolase 3;                                                                                                                                                                                                                                                                                                                            |
| N | Q8GY63 | DE | Inositol polyphosphate 1-phosphatase 3;                                                                                                                                                                                                                                                                                                                                              |
| N | Q8GY63 | DE | Inositol-1,4-bisphosphate 1-phosphatase 3;                                                                                                                                                                                                                                                                                                                                           |
| N | Q8GY63 | DE | Probable SAL3 phosphatase;                                                                                                                                                                                                                                                                                                                                                           |
| N | Q8GY63 | DR | 3'(2'),5'-bisphosphate nucleotidase activity                                                                                                                                                                                                                                                                                                                                         |

|   |        |    |                                                                                                                                                                                                                                                                                                                                                                                                                                    |
|---|--------|----|------------------------------------------------------------------------------------------------------------------------------------------------------------------------------------------------------------------------------------------------------------------------------------------------------------------------------------------------------------------------------------------------------------------------------------|
| N | Q8GY63 | DR | inositol-1,4-bisphosphate 1-phosphatase activity                                                                                                                                                                                                                                                                                                                                                                                   |
| N | Q8GY63 | DR | metal ion binding                                                                                                                                                                                                                                                                                                                                                                                                                  |
| N | Q8GY63 | DR | sulfur compound metabolic process                                                                                                                                                                                                                                                                                                                                                                                                  |
| N | Q8H852 | CC | The coatomer is a cytosolic protein complex that binds to dilysine motifs and reversibly associates with Golgi non- clathrin-coated vesicles, which further mediate biosynthetic protein transport from the ER, via the Golgi up to the trans Golgi network. Coatomer complex is required for budding from Golgi membranes, and is essential for the retrograde Golgi-to-ER transport of dilysine-tagged proteins (By similarity). |
| N | Q8H852 | CC | Coatomer subunit gamma-1;                                                                                                                                                                                                                                                                                                                                                                                                          |
| N | Q8H852 | DE | Gamma-1-COP;                                                                                                                                                                                                                                                                                                                                                                                                                       |
| N | Q8H852 | DE | Gamma-1-coat protein;                                                                                                                                                                                                                                                                                                                                                                                                              |
| N | Q8H852 | DR | intracellular protein transport                                                                                                                                                                                                                                                                                                                                                                                                    |
| N | Q8H852 | DR | structural molecule activity                                                                                                                                                                                                                                                                                                                                                                                                       |
| N | Q8H852 | DR | vesicle-mediated transport                                                                                                                                                                                                                                                                                                                                                                                                         |
| N | Q8HQQ3 | CC | Usually encoded in the trnK tRNA gene intron                                                                                                                                                                                                                                                                                                                                                                                       |
| N | Q8HQQ3 | CC | probably assists in splicing its own and other chloroplast group II introns (By similarity).                                                                                                                                                                                                                                                                                                                                       |
| N | Q8HQQ3 | DE | Intron maturase;                                                                                                                                                                                                                                                                                                                                                                                                                   |
| N | Q8HQQ3 | DR | mRNA processing                                                                                                                                                                                                                                                                                                                                                                                                                    |
| N | Q8HQQ3 | DR | tRNA processing                                                                                                                                                                                                                                                                                                                                                                                                                    |
| N | Q8HVA1 | CC | Usually encoded in the trnK tRNA gene intron                                                                                                                                                                                                                                                                                                                                                                                       |
| N | Q8HVA1 | CC | probably assists in splicing its own and other chloroplast group II introns (By similarity).                                                                                                                                                                                                                                                                                                                                       |
| N | Q8HVA1 | DE | Intron maturase;                                                                                                                                                                                                                                                                                                                                                                                                                   |
| N | Q8HVA1 | DR | mRNA processing                                                                                                                                                                                                                                                                                                                                                                                                                    |
| N | Q8HVA1 | DR | tRNA processing                                                                                                                                                                                                                                                                                                                                                                                                                    |
| N | Q8HVL8 | CC | NDH shuttles electrons from NAD(P)H:plastoquinone, via FMN and iron-sulfur (Fe-S) centers, to quinones in the photosynthetic chain and possibly in a chloroplast respiratory chain                                                                                                                                                                                                                                                 |
| N | Q8HVL8 | CC | Couples the redox reaction to proton translocation, and thus conserves the redox energy in a proton gradient (By similarity).                                                                                                                                                                                                                                                                                                      |
| N | Q8HVL8 | CC | The immediate electron acceptor for the enzyme in this species is believed to be plastoquinone                                                                                                                                                                                                                                                                                                                                     |
| N | Q8HVL8 | DE | NAD(P)H dehydrogenase subunit I;                                                                                                                                                                                                                                                                                                                                                                                                   |
| N | Q8HVL8 | DE | NAD(P)H-quinone oxidoreductase subunit I, chloroplastic;                                                                                                                                                                                                                                                                                                                                                                           |
| N | Q8HVL8 | DE | NADH-plastoquinone oxidoreductase subunit I;                                                                                                                                                                                                                                                                                                                                                                                       |
| N | Q8HVL8 | DE | NDH subunit I;                                                                                                                                                                                                                                                                                                                                                                                                                     |
| N | Q8HVL8 | DR | 4 iron, 4 sulfur cluster binding                                                                                                                                                                                                                                                                                                                                                                                                   |
| N | Q8HVL8 | DR | NADH dehydrogenase (ubiquinone) activity                                                                                                                                                                                                                                                                                                                                                                                           |
| N | Q8HVL8 | DR | electron carrier activity                                                                                                                                                                                                                                                                                                                                                                                                          |
| N | Q8HVL8 | DR | metal ion binding                                                                                                                                                                                                                                                                                                                                                                                                                  |
| N | Q8HVL8 | DR | oxidation-reduction process                                                                                                                                                                                                                                                                                                                                                                                                        |
| N | Q8HVL8 | DR | quinone binding                                                                                                                                                                                                                                                                                                                                                                                                                    |
| N | Q8HVR8 | CC | NDH shuttles electrons from NAD(P)H:plastoquinone, via FMN and iron-sulfur (Fe-S) centers, to quinones in the photosynthetic chain and possibly in a chloroplast respiratory chain                                                                                                                                                                                                                                                 |
| N | Q8HVR8 | CC | Couples the redox reaction to proton translocation, and thus conserves the redox energy in a proton gradient (By similarity).                                                                                                                                                                                                                                                                                                      |
| N | Q8HVR8 | CC | The immediate electron acceptor for the enzyme in this species is believed to be plastoquinone                                                                                                                                                                                                                                                                                                                                     |
| N | Q8HVR8 | DE | NAD(P)H dehydrogenase subunit I;                                                                                                                                                                                                                                                                                                                                                                                                   |
| N | Q8HVR8 | DE | NAD(P)H-quinone oxidoreductase subunit I, chloroplastic;                                                                                                                                                                                                                                                                                                                                                                           |
| N | Q8HVR8 | DE | NADH-plastoquinone oxidoreductase subunit I;                                                                                                                                                                                                                                                                                                                                                                                       |
| N | Q8HVR8 | DE | NDH subunit I;                                                                                                                                                                                                                                                                                                                                                                                                                     |
| N | Q8HVR8 | DR | 4 iron, 4 sulfur cluster binding                                                                                                                                                                                                                                                                                                                                                                                                   |
| N | Q8HVR8 | DR | NADH dehydrogenase (ubiquinone) activity                                                                                                                                                                                                                                                                                                                                                                                           |
| N | Q8HVR8 | DR | electron carrier activity                                                                                                                                                                                                                                                                                                                                                                                                          |
| N | Q8HVR8 | DR | metal ion binding                                                                                                                                                                                                                                                                                                                                                                                                                  |
| N | Q8HVR8 | DR | oxidation-reduction process                                                                                                                                                                                                                                                                                                                                                                                                        |
| N | Q8HVR8 | DR | quinone binding                                                                                                                                                                                                                                                                                                                                                                                                                    |
| N | Q8HVV4 | CC | DNA-dependent RNA polymerase catalyzes the transcription of DNA into RNA using the four ribonucleoside triphosphates as substrates.                                                                                                                                                                                                                                                                                                |
| N | Q8HVV4 | DE | DNA-directed RNA polymerase subunit beta';                                                                                                                                                                                                                                                                                                                                                                                         |
| N | Q8HVV4 | DE | Plastid-encoded RNA polymerase subunit beta';                                                                                                                                                                                                                                                                                                                                                                                      |
| N | Q8HVV4 | DE | RNA polymerase subunit beta';                                                                                                                                                                                                                                                                                                                                                                                                      |
| N | Q8HVV4 | DR | DNA-directed RNA polymerase activity                                                                                                                                                                                                                                                                                                                                                                                               |

|   |        |    |                                                                                                                                                                                                                                                                                                |
|---|--------|----|------------------------------------------------------------------------------------------------------------------------------------------------------------------------------------------------------------------------------------------------------------------------------------------------|
| N | Q8HXW6 | CC | Removes thioester-linked fatty acyl groups such as palmitate from modified cysteine residues in proteins or peptides during lysosomal degradation                                                                                                                                              |
| N | Q8HXW6 | CC | Prefers acyl chain lengths of 14 to 18 carbons (By similarity).                                                                                                                                                                                                                                |
| N | Q8HXW6 | DE | Palmitoyl-protein hydrolase 1;                                                                                                                                                                                                                                                                 |
| N | Q8HXW6 | DE | Palmitoyl-protein thioesterase 1;                                                                                                                                                                                                                                                              |
| N | Q8HXW6 | DR | DNA fragmentation involved in apoptotic nuclear change                                                                                                                                                                                                                                         |
| N | Q8HXW6 | DR | cofactor metabolic process                                                                                                                                                                                                                                                                     |
| N | Q8HXW6 | DR | cofactor transport                                                                                                                                                                                                                                                                             |
| N | Q8HXW6 | DR | lipid catabolic process                                                                                                                                                                                                                                                                        |
| N | Q8HXW6 | DR | lysosomal lumen acidification                                                                                                                                                                                                                                                                  |
| N | Q8HXW6 | DR | membrane raft organization                                                                                                                                                                                                                                                                     |
| N | Q8HXW6 | DR | negative regulation of cell growth                                                                                                                                                                                                                                                             |
| N | Q8HXW6 | DR | negative regulation of neuron apoptosis                                                                                                                                                                                                                                                        |
| N | Q8HXW6 | DR | nervous system development                                                                                                                                                                                                                                                                     |
| N | Q8HXW6 | DR | palmitoyl-(protein) hydrolase activity                                                                                                                                                                                                                                                         |
| N | Q8HXW6 | DR | palmitoyl-CoA hydrolase activity                                                                                                                                                                                                                                                               |
| N | Q8HXW6 | DR | positive regulation of pinocytosis                                                                                                                                                                                                                                                             |
| N | Q8HXW6 | DR | positive regulation of receptor-mediated endocytosis                                                                                                                                                                                                                                           |
| N | Q8HXW6 | DR | protein depalmitoylation                                                                                                                                                                                                                                                                       |
| N | Q8HXW6 | DR | protein transport                                                                                                                                                                                                                                                                              |
| N | Q8IG39 | CC | Putative nucleoside deaminase                                                                                                                                                                                                                                                                  |
| N | Q8IG39 | CC | May catalyze the hydrolytic deamination of adenosine or some similar substrate and play a role in purine metabolism (By similarity).                                                                                                                                                           |
| N | Q8IG39 | DE | Adenosine deaminase-like protein;                                                                                                                                                                                                                                                              |
| N | Q8IG39 | DR | deaminase activity                                                                                                                                                                                                                                                                             |
| N | Q8IG39 | DR | hydrolase activity                                                                                                                                                                                                                                                                             |
| N | Q8IG39 | DR | metal ion binding                                                                                                                                                                                                                                                                              |
| N | Q8IG39 | DR | purine ribonucleoside monophosphate biosynthetic process                                                                                                                                                                                                                                       |
| N | Q8ISP0 | CC | Located at the top of the head of the 40S subunit, it contacts several helices of the 18S rRNA (By similarity).                                                                                                                                                                                |
| N | Q8ISP0 | DE | 40S ribosomal protein S18;                                                                                                                                                                                                                                                                     |
| N | Q8ISP0 | DR | structural constituent of ribosome                                                                                                                                                                                                                                                             |
| N | Q8ITC7 | CC | Acts as a receptor for the neuropeptides CAP-1 and CAP- 2, but not CAP-3                                                                                                                                                                                                                       |
| N | Q8ITC7 | CC | Probably a component of signal transduction pathway that leads to Malpighian tubule fluid secretion in response to these ligands.                                                                                                                                                              |
| N | Q8ITC7 | DE | Cap2b receptor;                                                                                                                                                                                                                                                                                |
| N | Q8ITC7 | DE | Neuropeptides capa receptor;                                                                                                                                                                                                                                                                   |
| N | Q8ITC7 | DR | body fluid secretion                                                                                                                                                                                                                                                                           |
| N | Q8ITC7 | DR | neuromedin U receptor activity                                                                                                                                                                                                                                                                 |
| N | Q8IVF1 | DE | Protein FAM22A;                                                                                                                                                                                                                                                                                |
| N | Q8IWX7 | CC | May play a role in sarcomere formation during muscle cell development (By similarity)                                                                                                                                                                                                          |
| N | Q8IWX7 | CC | May act as co-chaperone for HSP90 (Potential)                                                                                                                                                                                                                                                  |
| N | Q8IWX7 | CC | May be necessary for proper folding of myosin (Potential).                                                                                                                                                                                                                                     |
| N | Q8IWX7 | DE | Protein unc-45 homolog B;                                                                                                                                                                                                                                                                      |
| N | Q8IWX7 | DR | cell differentiation                                                                                                                                                                                                                                                                           |
| N | Q8IWX7 | DR | muscle organ development                                                                                                                                                                                                                                                                       |
| N | Q8IYM0 | DE | Protein FAM186B;                                                                                                                                                                                                                                                                               |
| N | Q8J282 | CC | Involved in autophagy, in the development of aerial hyphae, in pigmentation and in the differentiation of female reproductive organs                                                                                                                                                           |
| N | Q8J282 | CC | May be also involved in cytoplasm to vacuole transport (Cvt) vesicles formation (By similarity)                                                                                                                                                                                                |
| N | Q8J282 | CC | May mediate the delivery of the vesicles and autophagosomes to the vacuole via the microtubule cytoskeleton (By similarity).                                                                                                                                                                   |
| N | Q8J282 | DE | Autophagy-related protein 8;                                                                                                                                                                                                                                                                   |
| N | Q8J282 | DE | Autophagy-related ubiquitin-like modifier ATG8;                                                                                                                                                                                                                                                |
| N | Q8J282 | DE | Induced during the incompatibility reaction protein 7;                                                                                                                                                                                                                                         |
| N | Q8J282 | DR | protein transport                                                                                                                                                                                                                                                                              |
| N | Q8JTH0 | CC | Attaches the virus to host cellular receptor, inducing endocytosis of the virion                                                                                                                                                                                                               |
| N | Q8JTH0 | CC | In the endosome, the acidic pH induces conformational changes in the glycoprotein trimer, which trigger fusion between virus and cell membrane                                                                                                                                                 |
| N | Q8JTH0 | CC | There is convincing in vitro evidence that the muscular form of the nicotinic acetylcholine receptor (nAChR), the neuronal cell adhesion molecule (NCAM), and the p75 neurotrophin receptor (p75NTR) bind glycoprotein G and thereby facilitate rabies virus entry into cells (By similarity). |
| N | Q8JTH0 | DE | Glycoprotein G;                                                                                                                                                                                                                                                                                |

|   |        |    |                                                                                                                                                                                                                                         |
|---|--------|----|-----------------------------------------------------------------------------------------------------------------------------------------------------------------------------------------------------------------------------------------|
| N | Q8JZS9 | DE | 39S ribosomal protein L48, mitochondrial;                                                                                                                                                                                               |
| N | Q8JZS9 | DR | structural constituent of ribosome                                                                                                                                                                                                      |
| N | Q8K3Z9 | CC | Essential component of the nuclear pore complex (NPC)                                                                                                                                                                                   |
| N | Q8K3Z9 | CC | The repeat-containing domain may be involved in anchoring components of the pore complex to the pore membrane                                                                                                                           |
| N | Q8K3Z9 | CC | When overexpressed in cells induces the formation of cytoplasmic annulate lamellae (AL) (By similarity).                                                                                                                                |
| N | Q8K3Z9 | DE | Nuclear envelope pore membrane protein POM 121;                                                                                                                                                                                         |
| N | Q8K3Z9 | DE | Nucleoporin Nup121;                                                                                                                                                                                                                     |
| N | Q8K3Z9 | DE | Pore membrane protein of 121 kDa;                                                                                                                                                                                                       |
| N | Q8K3Z9 | DR | mRNA transport                                                                                                                                                                                                                          |
| N | Q8K3Z9 | DR | protein transport                                                                                                                                                                                                                       |
| N | Q8K3Z9 | DR | transmembrane transport                                                                                                                                                                                                                 |
| N | Q8K593 | CC | Catalyzes the conversion of phosphatidic acid (PA) to diacylglycerol (DG)                                                                                                                                                               |
| N | Q8K593 | CC | In addition it hydrolyzes lysophosphatidic acid (LPA), ceramide-1-phosphate (C-1-P) and sphingosine-1-phosphate (S-1-P) (By similarity).                                                                                                |
| N | Q8K593 | DE | Lipid phosphate phosphohydrolase 2;                                                                                                                                                                                                     |
| N | Q8K593 | DE | Phosphatidate phosphohydrolase type 2c;                                                                                                                                                                                                 |
| N | Q8K593 | DE | Phosphatidic acid phosphatase 2c;                                                                                                                                                                                                       |
| N | Q8K593 | DR | phosphatidate phosphatase activity                                                                                                                                                                                                      |
| N | Q8K6Z3 | CC | transfers and isomerizes the ribose moiety from adenosine to the 7-aminomeanyl group of 7-deazaguanine (preQ1-tRNA) to give epoxyqueuosine (oQ-tRNA) (By similarity)                                                                    |
| N | Q8K6Z3 | DE | Queuosine biosynthesis protein queA;                                                                                                                                                                                                    |
| N | Q8K6Z3 | DE | S-adenosylmethionine:tRNA ribosyltransferase-isomerase;                                                                                                                                                                                 |
| N | Q8K6Z3 | DR | isomerase activity                                                                                                                                                                                                                      |
| N | Q8K6Z3 | DR | queuosine biosynthetic process                                                                                                                                                                                                          |
| N | Q8K6Z3 | DR | transferase activity                                                                                                                                                                                                                    |
| N | Q8K7C0 | CC | Interferes with activator-stimulated transcription by interaction with the RNA polymerase alpha-CTD                                                                                                                                     |
| N | Q8K7C0 | CC | May function to globally reduce transcription of genes involved in growth- and development-promoting processes and to increase transcription of genes involved in thiol homeostasis, during periods of extreme stress (By similarity).  |
| N | Q8K7C0 | DE | Regulatory protein spx;                                                                                                                                                                                                                 |
| N | Q8K873 | CC | Forms oxaloacetate, a four-carbon dicarboxylic acid source for the tricarboxylic acid cycle.                                                                                                                                            |
| N | Q8K873 | DE | Phosphoenolpyruvate carboxylase;                                                                                                                                                                                                        |
| N | Q8K873 | DR | carbon fixation                                                                                                                                                                                                                         |
| N | Q8K873 | DR | phosphoenolpyruvate carboxylase activity                                                                                                                                                                                                |
| N | Q8K873 | DR | tricarboxylic acid cycle                                                                                                                                                                                                                |
| N | Q8K8E4 | CC | Has an important function as a repair enzyme for proteins that have been inactivated by oxidation                                                                                                                                       |
| N | Q8K8E4 | CC | Catalyzes the reversible oxidation-reduction of methionine sulfoxide in proteins to methionine (By similarity).                                                                                                                         |
| N | Q8K8E4 | DE | Peptide Met(O) reductase;                                                                                                                                                                                                               |
| N | Q8K8E4 | DE | Peptide methionine sulfoxide reductase MsrA;                                                                                                                                                                                            |
| N | Q8K8E4 | DE | Peptide-methionine (S)-S-oxide reductase;                                                                                                                                                                                               |
| N | Q8K8E4 | DE | Protein-methionine-S-oxide reductase;                                                                                                                                                                                                   |
| N | Q8K8E4 | DR | oxidation-reduction process                                                                                                                                                                                                             |
| N | Q8K8E4 | DR | peptide-methionine-(S)-S-oxide reductase activity                                                                                                                                                                                       |
| N | Q8K8E4 | DR | protein metabolic process                                                                                                                                                                                                               |
| N | Q8K9Y5 | CC | NDH-1 shuttles electrons from NADH, via FMN and iron- sulfur (Fe-S) centers, to quinones in the respiratory chain                                                                                                                       |
| N | Q8K9Y5 | CC | Couples the redox reaction to proton translocation (for every two electrons transferred, four hydrogen ions are translocated across the cytoplasmic membrane), and thus conserves the redox energy in a proton gradient (By similarity) |
| N | Q8K9Y5 | CC | The immediate electron acceptor for the enzyme in this species is believed to be ubiquinone                                                                                                                                             |
| N | Q8K9Y5 | DE | NADH dehydrogenase I subunit C/D;                                                                                                                                                                                                       |
| N | Q8K9Y5 | DE | NADH-quinone oxidoreductase subunit C/D;                                                                                                                                                                                                |
| N | Q8K9Y5 | DE | NDH-1 subunit C/D;                                                                                                                                                                                                                      |
| N | Q8K9Y5 | DR | NADH dehydrogenase (ubiquinone) activity                                                                                                                                                                                                |
| N | Q8K9Y5 | DR | oxidation-reduction process                                                                                                                                                                                                             |
| N | Q8K9Y5 | DR | quinone binding                                                                                                                                                                                                                         |
| N | Q8KED5 | CC | Has antioxidant activity                                                                                                                                                                                                                |
| N | Q8KED5 | CC | Could remove peroxides or H(2)O(2) (By similarity).                                                                                                                                                                                     |

|   |        |    |                                                                                                                                                     |
|---|--------|----|-----------------------------------------------------------------------------------------------------------------------------------------------------|
| N | Q8KED5 | DE | Probable thiol peroxidase;                                                                                                                          |
| N | Q8KED5 | DR | cell redox homeostasis                                                                                                                              |
| N | Q8KED5 | DR | oxidation-reduction process                                                                                                                         |
| N | Q8KED5 | DR | thioredoxin peroxidase activity                                                                                                                     |
| N | Q8KEW8 | CC | Binds specifically to the ssrA RNA (tmRNA) and is required for stable association of ssrA with ribosomes (By similarity).                           |
| N | Q8KEW8 | DE | SsrA-binding protein;                                                                                                                               |
| N | Q8KF55 | DE | 1-(5-phosphoribosyl)-5-[(5-phosphoribosylamino)methylideneamino] imidazole-4-carboxamide isomerase;                                                 |
| N | Q8KF55 | DE | Phosphoribosylformimino-5-aminoimidazole carboxamide ribotide isomerase;                                                                            |
| N | Q8KF55 | DR | 1-(5-phosphoribosyl)-5-[(5-phosphoribosylamino)methylideneamino]imidazole-4-carboxamide isomerase activity                                          |
| N | Q8KF55 | DR | histidine biosynthetic process                                                                                                                      |
| N | Q8KG17 | DE | 50S ribosomal protein L10;                                                                                                                          |
| N | Q8KG17 | DR | ribosome biogenesis                                                                                                                                 |
| N | Q8KG17 | DR | structural constituent of ribosome                                                                                                                  |
| N | Q8KG38 | CC | Catalyzes the first step in hexosamine metabolism, converting fructose-6P into glucosamine-6P using glutamine as a nitrogen source (By similarity). |
| N | Q8KG38 | DE | D-fructose-6-phosphate amidotransferase;                                                                                                            |
| N | Q8KG38 | DE | Glucosamine--fructose-6-phosphate aminotransferase [isomerizing];                                                                                   |
| N | Q8KG38 | DE | Glucosamine-6-phosphate synthase;                                                                                                                   |
| N | Q8KG38 | DE | Hexosephosphate aminotransferase;                                                                                                                   |
| N | Q8KG38 | DE | L-glutamine-D-fructose-6-phosphate amidotransferase;                                                                                                |
| N | Q8KG38 | DR | carbohydrate biosynthetic process                                                                                                                   |
| N | Q8KG38 | DR | glutamine metabolic process                                                                                                                         |
| N | Q8KG38 | DR | glutamine-fructose-6-phosphate transaminase (isomerizing) activity                                                                                  |
| N | Q8KG38 | DR | sugar binding                                                                                                                                       |
| N | Q8L3R2 | CC | Potential calcium sensor (By similarity).                                                                                                           |
| N | Q8L3R2 | DE | Calmodulin-like protein 41;                                                                                                                         |
| N | Q8L3R2 | DE | Probable calcium-binding protein CML41;                                                                                                             |
| N | Q8L3R2 | DR | calcium ion binding                                                                                                                                 |
| N | Q8L910 | CC | May constitute a glutathione peroxidase-like protective system against oxidative stresses (By similarity).                                          |
| N | Q8L910 | DE | Probable glutathione peroxidase 4;                                                                                                                  |
| N | Q8L910 | DR | glutathione peroxidase activity                                                                                                                     |
| N | Q8L910 | DR | oxidation-reduction process                                                                                                                         |
| N | Q8L910 | DR | response to oxidative stress                                                                                                                        |
| N | Q8LBC0 | DE | Cyclin-T1-3;                                                                                                                                        |
| N | Q8LBC0 | DR | cell division                                                                                                                                       |
| N | Q8LBC0 | DR | protein binding                                                                                                                                     |
| N | Q8LW53 | CC | Uses Mg-ATP and reduced ferredoxin to reduce ring D of protochlorophyllide (Pchlde) to form chlorophyllide a (Chlide) (By similarity)               |
| N | Q8LW53 | CC | This reaction is light-independent.                                                                                                                 |
| N | Q8LW53 | DE | DPOR subunit N;                                                                                                                                     |
| N | Q8LW53 | DE | LI-POR subunit N;                                                                                                                                   |
| N | Q8LW53 | DE | Light-independent protochlorophyllide reductase subunit N;                                                                                          |
| N | Q8LW53 | DR | chlorophyll biosynthetic process                                                                                                                    |
| N | Q8LW53 | DR | oxidation-reduction process                                                                                                                         |
| N | Q8LW53 | DR | oxidoreductase activity, acting on iron-sulfur proteins as donors                                                                                   |
| N | Q8LW53 | DR | photosynthesis, dark reaction                                                                                                                       |
| N | Q8MCL8 | CC | Usually encoded in the trnK tRNA gene intron                                                                                                        |
| N | Q8MCL8 | CC | probably assists in splicing its own and other chloroplast group II introns (By similarity)                                                         |
| N | Q8MCL8 | DE | Intron maturase;                                                                                                                                    |
| N | Q8MCL8 | DR | mRNA processing                                                                                                                                     |
| N | Q8MCL8 | DR | tRNA processing                                                                                                                                     |
| N | Q8MIB3 | CC | Xenobiotic transporter that may play an important role in the exclusion of xenobiotics from the brain                                               |
| N | Q8MIB3 | CC | May be involved in brain-to-blood efflux (By similarity).                                                                                           |
| N | Q8MIB3 | DE | ATP-binding cassette sub-family G member 2;                                                                                                         |
| N | Q8MIB3 | DE | Brain multidrug resistance protein;                                                                                                                 |
| N | Q8MIB3 | DE | CD338;                                                                                                                                              |
| N | Q8MIB3 | DR | ATPase activity                                                                                                                                     |
| N | Q8MIQ5 | CC | May stabilize HDL (high density lipoprotein) structure by its association with lipids, and affect the HDL metabolism.                               |
| N | Q8MIQ5 | DE | Apolipoprotein A-II;                                                                                                                                |

|   |        |    |                                                                                                                                                                                            |
|---|--------|----|--------------------------------------------------------------------------------------------------------------------------------------------------------------------------------------------|
| N | Q8MIQ5 | DE | Apolipoprotein A2;                                                                                                                                                                         |
| N | Q8MIQ5 | DR | positive regulation of interleukin-8 biosynthetic process                                                                                                                                  |
| N | Q8MIQ5 | DR | protein heterodimerization activity                                                                                                                                                        |
| N | Q8MJZ2 | CC | May act as receptor for class I MHC antigens (By similarity).                                                                                                                              |
| N | Q8MJZ2 | DE | Leukocyte immunoglobulin-like receptor E;                                                                                                                                                  |
| N | Q8MJZ2 | DE | Leukocyte immunoglobulin-like receptor subfamily A member 6;                                                                                                                               |
| N | Q8MJZ2 | DR | receptor activity                                                                                                                                                                          |
| N | Q8N394 | DE | Transmembrane and TPR repeat-containing protein 2;                                                                                                                                         |
| N | Q8N801 | DE | Uncharacterized protein C2orf61;                                                                                                                                                           |
| N | Q8NBX0 | DE | Probable saccharopine dehydrogenase;                                                                                                                                                       |
| N | Q8NBX0 | DR | oxidation-reduction process                                                                                                                                                                |
| N | Q8NBX0 | DR | saccharopine dehydrogenase (NAD+, L-glutamate-forming) activity                                                                                                                            |
| N | Q8NCW5 | DE | Apolipoprotein A-I-binding protein;                                                                                                                                                        |
| N | Q8NCW5 | DE | YjeF N-terminal domain-containing protein 1;                                                                                                                                               |
| N | Q8NCW5 | DR | protein binding                                                                                                                                                                            |
| N | Q8NCX0 | DE | Coiled-coil domain-containing protein 150;                                                                                                                                                 |
| N | Q8NE01 | CC | Probable metal transporter (By similarity).                                                                                                                                                |
| N | Q8NE01 | DE | Ancient conserved domain-containing protein 3;                                                                                                                                             |
| N | Q8NE01 | DE | Metal transporter CNNM3;                                                                                                                                                                   |
| N | Q8NE01 | DR | ion transport                                                                                                                                                                              |
| N | Q8NE01 | DR | protein binding                                                                                                                                                                            |
| N | Q8NGG1 | CC | Odorant receptor (Potential).                                                                                                                                                              |
| N | Q8NGG1 | DE | Olfactory receptor 8J2;                                                                                                                                                                    |
| N | Q8NGG1 | DR | olfactory receptor activity                                                                                                                                                                |
| N | Q8NGG1 | DR | sensory perception of smell                                                                                                                                                                |
| N | Q8NGU4 | CC | Odorant receptor (Potential).                                                                                                                                                              |
| N | Q8NGU4 | DE | Putative olfactory receptor 2I1;                                                                                                                                                           |
| N | Q8NGU4 | DE | Putative olfactory receptor 2I2;                                                                                                                                                           |
| N | Q8NGU4 | DE | Putative olfactory receptor 2I3;                                                                                                                                                           |
| N | Q8NGU4 | DE | Putative olfactory receptor 2I4;                                                                                                                                                           |
| N | Q8NGU4 | DR | olfactory receptor activity                                                                                                                                                                |
| N | Q8NGU4 | DR | sensory perception of smell                                                                                                                                                                |
| N | Q8NHP1 | CC | Can reduce the dialdehyde protein-binding form of aflatoxin B1 (AFB1) to the non-binding AFB1 dialcohol                                                                                    |
| N | Q8NHP1 | CC | May be involved in protection of liver against the toxic and carcinogenic effects of AFB1, a potent hepatocarcinogen (By similarity).                                                      |
| N | Q8NHP1 | DE | AFB1 aldehyde reductase 3;                                                                                                                                                                 |
| N | Q8NHP1 | DE | Aflatoxin B1 aldehyde reductase member 4;                                                                                                                                                  |
| N | Q8NHP1 | DE | Aldoketoreductase 7-like;                                                                                                                                                                  |
| N | Q8NHP1 | DR | oxidation-reduction process                                                                                                                                                                |
| N | Q8NHP1 | DR | oxidoreductase activity                                                                                                                                                                    |
| N | Q8NHR7 | DE | Uncharacterized protein C15orf43;                                                                                                                                                          |
| N | Q8NI37 | DE | Protein phosphatase PTC7 homolog;                                                                                                                                                          |
| N | Q8NI37 | DE | T-cell activation protein phosphatase 2C-like;                                                                                                                                             |
| N | Q8NI37 | DE | T-cell activation protein phosphatase 2C;                                                                                                                                                  |
| N | Q8NI37 | DR | metal ion binding                                                                                                                                                                          |
| N | Q8NI37 | DR | phosphoprotein phosphatase activity                                                                                                                                                        |
| N | Q8NQH1 | CC | Condenses 4-methyl-5-(beta-hydroxyethyl)thiazole monophosphate (THZ-P) and 4-amino-5-hydroxymethyl pyrimidine pyrophosphate (HMP-PP) to form thiamine monophosphate (TMP) (By similarity). |
| N | Q8NQH1 | DE | HMP kinase;                                                                                                                                                                                |
| N | Q8NQH1 | DE | HMP-P kinase;                                                                                                                                                                              |
| N | Q8NQH1 | DE | HMP-phosphate kinase;                                                                                                                                                                      |
| N | Q8NQH1 | DE | HMPP kinase;                                                                                                                                                                               |
| N | Q8NQH1 | DE | Hydroxymethylpyrimidine kinase;                                                                                                                                                            |
| N | Q8NQH1 | DE | Hydroxymethylpyrimidine phosphate kinase;                                                                                                                                                  |
| N | Q8NQH1 | DE | Hydroxymethylpyrimidine/phosphomethylpyrimidine kinase;                                                                                                                                    |
| N | Q8NQH1 | DE | Multifunctional protein thiED;                                                                                                                                                             |
| N | Q8NQH1 | DE | TMP pyrophosphorylase;                                                                                                                                                                     |
| N | Q8NQH1 | DE | TMP-PPase;                                                                                                                                                                                 |
| N | Q8NQH1 | DE | Thiamine-phosphate pyrophosphorylase;                                                                                                                                                      |
| N | Q8NQH1 | DE | Thiamine-phosphate synthase;                                                                                                                                                               |
| N | Q8NQH1 | DR | hydroxymethylpyrimidine kinase activity                                                                                                                                                    |
| N | Q8NQH1 | DR | metal ion binding                                                                                                                                                                          |
| N | Q8NQH1 | DR | phosphomethylpyrimidine kinase activity                                                                                                                                                    |



|   |        |    |                                                                                                                                               |
|---|--------|----|-----------------------------------------------------------------------------------------------------------------------------------------------|
| N | Q8NQH1 | DR | thiamine biosynthetic process                                                                                                                 |
| N | Q8NQH1 | DR | thiamine-phosphate diphosphorylase activity                                                                                                   |
| N | Q8NSM4 | CC | Modulates the activities of several enzymes which are inactive in their acetylated form (By similarity).                                      |
| N | Q8NSM4 | DE | NAD-dependent deacetylase;                                                                                                                    |
| N | Q8NSM4 | DE | Regulatory protein SIR2 homolog;                                                                                                              |
| N | Q8NSM4 | DR | chromatin silencing                                                                                                                           |
| N | Q8NSM4 | DR | hydrolase activity, acting on carbon-nitrogen (but not peptide) bonds, in linear amides                                                       |
| N | Q8NSM4 | DR | protein deacetylation                                                                                                                         |
| N | Q8NSM4 | DR | zinc ion binding                                                                                                                              |
| N | Q8NW03 | DE | Protein CrcB homolog 2;                                                                                                                       |
| N | Q8NZ29 | DE | Putative competence-damage inducible protein;                                                                                                 |
| N | Q8NZ29 | DR | Mo-molybdopterin cofactor biosynthetic process                                                                                                |
| N | Q8NZH6 | CC | Removes N-terminal dipeptides sequentially from polypeptides having unsubstituted N-termini provided that the penultimate residue is proline. |
| N | Q8NZH6 | DE | X-Pro dipeptidyl-peptidase;                                                                                                                   |
| N | Q8NZH6 | DE | X-prolyl-dipeptidyl aminopeptidase;                                                                                                           |
| N | Q8NZH6 | DE | Xaa-Pro dipeptidyl-peptidase;                                                                                                                 |
| N | Q8NZH6 | DR | aminopeptidase activity                                                                                                                       |
| N | Q8NZH6 | DR | dipeptidyl-peptidase activity                                                                                                                 |
| N | Q8NZH6 | DR | serine-type peptidase activity                                                                                                                |
| N | Q8P3N0 | CC | Specifically methylates the N7 position of guanosine in position 527 of 16S rRNA (By similarity).                                             |
| N | Q8P3N0 | DE | 16S rRNA 7-methylguanosine methyltransferase;                                                                                                 |
| N | Q8P3N0 | DE | 16S rRNA m7G methyltransferase;                                                                                                               |
| N | Q8P3N0 | DE | Ribosomal RNA small subunit methyltransferase G;                                                                                              |
| N | Q8P3N0 | DR | rRNA methyltransferase activity                                                                                                               |
| N | Q8P5L1 | CC | Catalyzes the oxidation of 3-carboxy-2-hydroxy-4- methylpentanoate (3-isopropylmalate) to 3-carboxy-4-methyl-2- oxopentanoate                 |
| N | Q8P5L1 | CC | The product decarboxylates to 4-methyl-2 oxopentanoate.                                                                                       |
| N | Q8P5L1 | DE | 3-isopropylmalate dehydrogenase;                                                                                                              |
| N | Q8P5L1 | DE | Beta-IPM dehydrogenase;                                                                                                                       |
| N | Q8P5L1 | DR | 3-isopropylmalate dehydrogenase activity                                                                                                      |
| N | Q8P5L1 | DR | leucine biosynthetic process                                                                                                                  |
| N | Q8P5L1 | DR | magnesium ion binding                                                                                                                         |
| N | Q8P5L1 | DR | oxidation-reduction process                                                                                                                   |
| N | Q8PAW4 | CC | Involved in saturated fatty acids biosynthesis.                                                                                               |
| N | Q8PAW4 | DE | (3R)-hydroxymyristoyl ACP dehydrase;                                                                                                          |
| N | Q8PAW4 | DE | (3R)-hydroxymyristoyl-[acyl-carrier-protein] dehydratase;                                                                                     |
| N | Q8PAW4 | DR | fatty acid biosynthetic process                                                                                                               |
| N | Q8PAW4 | DR | hydro-lyase activity                                                                                                                          |
| N | Q8PAW4 | DR | lipid A biosynthetic process                                                                                                                  |
| N | Q8PH04 | CC | Catalyzes the isomerization between 2-isopropylmalate and 3-isopropylmalate, via the formation of 2-isopropylmaleate.                         |
| N | Q8PH04 | DE | 3-isopropylmalate dehydratase small subunit;                                                                                                  |
| N | Q8PH04 | DE | Alpha-IPM isomerase;                                                                                                                          |
| N | Q8PH04 | DE | Isopropylmalate isomerase;                                                                                                                    |
| N | Q8PH04 | DR | 3-isopropylmalate dehydratase activity                                                                                                        |
| N | Q8PH04 | DR | leucine biosynthetic process                                                                                                                  |
| N | Q8PHP7 | DE | UPF0213 protein XAC3202;                                                                                                                      |
| N | Q8PHP7 | DR | nuclease activity                                                                                                                             |
| N | Q8PIX4 | DE | Maf-like protein XAC2771;                                                                                                                     |
| N | Q8PJ05 | DE | Deoxycytidine triphosphate deaminase;                                                                                                         |
| N | Q8PJ05 | DE | dCTP deaminase;                                                                                                                               |
| N | Q8PJ05 | DR | dCTP deaminase activity                                                                                                                       |
| N | Q8PJ05 | DR | dUTP biosynthetic process                                                                                                                     |
| N | Q8PLY5 | DE | 3-phosphoshikimate 1-carboxyvinyltransferase;                                                                                                 |
| N | Q8PLY5 | DE | 5-enolpyruvylshikimate-3-phosphate synthase;                                                                                                  |
| N | Q8PLY5 | DE | EPSP synthase;                                                                                                                                |
| N | Q8PLY5 | DR | 3-phosphoshikimate 1-carboxyvinyltransferase activity                                                                                         |
| N | Q8PLY5 | DR | aromatic amino acid family biosynthetic process                                                                                               |
| N | Q8PM39 | CC | Catalyzes the phosphorylation of NAD to NADP                                                                                                  |
| N | Q8PM39 | CC | Utilizes ATP and other nucleoside triphosphates as well as inorganic polyphosphate as a source of phosphorus (By similarity).                 |
| N | Q8PM39 | DE | Poly(P)/ATP NAD kinase;                                                                                                                       |

|   |        |    |                                                                                                                                                                                                                                                                                                              |
|---|--------|----|--------------------------------------------------------------------------------------------------------------------------------------------------------------------------------------------------------------------------------------------------------------------------------------------------------------|
| N | Q8PM39 | DE | Probable inorganic polyphosphate/ATP-NAD kinase;                                                                                                                                                                                                                                                             |
| N | Q8PM39 | DR | NAD+ kinase activity                                                                                                                                                                                                                                                                                         |
| N | Q8PMY1 | CC | Specifically methylates guanosine-37 in various tRNAs (By similarity).                                                                                                                                                                                                                                       |
| N | Q8PMY1 | DE | M1G-methyltransferase;                                                                                                                                                                                                                                                                                       |
| N | Q8PMY1 | DE | tRNA (guanine-N(1)-)-methyltransferase;                                                                                                                                                                                                                                                                      |
| N | Q8PMY1 | DE | tRNA [GM37] methyltransferase;                                                                                                                                                                                                                                                                               |
| N | Q8PMY1 | DR | tRNA (guanine-N1-)-methyltransferase activity                                                                                                                                                                                                                                                                |
| N | Q8PP46 | CC | Provides the sole de novo source of dTMP for DNA biosynthesis (By similarity).                                                                                                                                                                                                                               |
| N | Q8PP46 | DE | Thymidylate synthase;                                                                                                                                                                                                                                                                                        |
| N | Q8PP46 | DR | dTMP biosynthetic process                                                                                                                                                                                                                                                                                    |
| N | Q8PP46 | DR | thymidylate synthase activity                                                                                                                                                                                                                                                                                |
| N | Q8PPA3 | CC | Involved in the biosynthesis of lipid A, a phosphorylated glycolipid that anchors the lipopolysaccharide to the outer membrane of the cell (By similarity).                                                                                                                                                  |
| N | Q8PPA3 | DE | UDP-3-O-[3-hydroxymyristoyl] N-acetylglucosamine deacetylase;                                                                                                                                                                                                                                                |
| N | Q8PPA3 | DE | UDP-3-O-acyl-GlcNAc deacetylase;                                                                                                                                                                                                                                                                             |
| N | Q8PPA3 | DR | UDP-3-O-[3-hydroxymyristoyl] N-acetylglucosamine deacetylase activity                                                                                                                                                                                                                                        |
| N | Q8PPA3 | DR | lipid A biosynthetic process                                                                                                                                                                                                                                                                                 |
| N | Q8PQE8 | CC | NAD-binding protein involved in the addition of a carboxymethylaminomethyl (cmnm) group at the wobble position (U34) of certain tRNAs, forming tRNA-cmnm(5)s(2)U34 (By similarity).                                                                                                                          |
| N | Q8PQE8 | DE | Glucose-inhibited division protein A;                                                                                                                                                                                                                                                                        |
| N | Q8PQE8 | DE | tRNA uridine 5-carboxymethylaminomethyl modification enzyme MnmG;                                                                                                                                                                                                                                            |
| N | Q8PQE8 | DR | flavin adenine dinucleotide binding                                                                                                                                                                                                                                                                          |
| N | Q8PQE8 | DR | tRNA wobble uridine modification                                                                                                                                                                                                                                                                             |
| N | Q8PUQ8 | CC | DNA-dependent RNA polymerase catalyzes the transcription of DNA into RNA using the four ribonucleoside triphosphates as substrates.                                                                                                                                                                          |
| N | Q8PUQ8 | DE | DNA-directed RNA polymerase subunit H;                                                                                                                                                                                                                                                                       |
| N | Q8PUQ8 | DR | DNA-directed RNA polymerase activity                                                                                                                                                                                                                                                                         |
| N | Q8PV17 | CC | Located on the platform of the 30S subunit (By similarity).                                                                                                                                                                                                                                                  |
| N | Q8PV17 | DE | 30S ribosomal protein S11P;                                                                                                                                                                                                                                                                                  |
| N | Q8PV17 | DR | structural constituent of ribosome                                                                                                                                                                                                                                                                           |
| N | Q8PX17 | DE | Histidinol-phosphate aminotransferase;                                                                                                                                                                                                                                                                       |
| N | Q8PX17 | DE | Imidazole acetol-phosphate transaminase;                                                                                                                                                                                                                                                                     |
| N | Q8PX17 | DR | histidine biosynthetic process                                                                                                                                                                                                                                                                               |
| N | Q8PX17 | DR | histidinol-phosphate transaminase activity                                                                                                                                                                                                                                                                   |
| N | Q8PX17 | DR | pyridoxal phosphate binding                                                                                                                                                                                                                                                                                  |
| N | Q8PX50 | CC | Involved in protein export                                                                                                                                                                                                                                                                                   |
| N | Q8PX50 | CC | The function of the beta subunit is unknown, but it may be involved in stabilization of the trimeric complex (By similarity).                                                                                                                                                                                |
| N | Q8PX50 | DE | Preprotein translocase subunit secG;                                                                                                                                                                                                                                                                         |
| N | Q8PX50 | DE | Protein transport protein Sec61 subunit beta homolog;                                                                                                                                                                                                                                                        |
| N | Q8PX50 | DR | protein transport                                                                                                                                                                                                                                                                                            |
| N | Q8PX50 | DR | transmembrane transport                                                                                                                                                                                                                                                                                      |
| N | Q8PYZ0 | DE | UPF0284 protein MM_0708;                                                                                                                                                                                                                                                                                     |
| N | Q8PYZ0 | DR | cobalamin biosynthetic process                                                                                                                                                                                                                                                                               |
| N | Q8PYZ0 | DR | nicotinate-nucleotide-dimethylbenzimidazole phosphoribosyltransferase activity                                                                                                                                                                                                                               |
| N | Q8Q024 | CC | Catalyzes the attachment of valine to tRNA(Val)<br>As ValRS can inadvertently accommodate and process structurally similar amino acids such as threonine, to avoid such errors, it has a "posttransfer" editing activity that hydrolyzes mischarged Thr-tRNA(Val) in a tRNA-dependent manner (By similarity) |
| N | Q8Q024 | CC | Valine--tRNA ligase;                                                                                                                                                                                                                                                                                         |
| N | Q8Q024 | DE | Valine--tRNA ligase;                                                                                                                                                                                                                                                                                         |
| N | Q8Q024 | DE | Valyl-tRNA synthetase;                                                                                                                                                                                                                                                                                       |
| N | Q8Q024 | DR | valine-tRNA ligase activity                                                                                                                                                                                                                                                                                  |
| N | Q8Q024 | DR | valyl-tRNA aminoacylation                                                                                                                                                                                                                                                                                    |
| N | Q8R0J7 | CC | Component of the ESCRT-I complex, a regulator of vesicular trafficking process                                                                                                                                                                                                                               |
| N | Q8R0J7 | CC | May be involved in cell growth and differentiation (By similarity).                                                                                                                                                                                                                                          |
| N | Q8R0J7 | CC | Required for the sorting of endocytic ubiquitinated cargos into multivesicular bodies                                                                                                                                                                                                                        |
| N | Q8R0J7 | DE | ESCRT-I complex subunit VPS37B;                                                                                                                                                                                                                                                                              |
| N | Q8R0J7 | DE | Vacuolar protein sorting-associated protein 37B;                                                                                                                                                                                                                                                             |
| N | Q8R0J7 | DR | protein transport                                                                                                                                                                                                                                                                                            |
| N | Q8R197 | CC | In fatty acid biosynthesis chain termination and release of the free fatty acid product is achieved by hydrolysis of the thio ester by a thioesterase I, a component of the fatty acid synthetase complex                                                                                                    |

|   |        |    |                                                                                                                                                                                                                       |
|---|--------|----|-----------------------------------------------------------------------------------------------------------------------------------------------------------------------------------------------------------------------|
| N | Q8R197 | CC | However, in the mammary glands of non-ruminant mammals, and in the uropygial gland of certain waterfowl there exists a second thioesterase which releases medium-chain length fatty acids (C8 to C2) (By similarity). |
| N | Q8R197 | CC | The chain length of the released fatty acid is usually C16                                                                                                                                                            |
| N | Q8R197 | DE | Oleoyl-ACP hydrolase;                                                                                                                                                                                                 |
| N | Q8R197 | DE | S-acyl fatty acid synthase thioesterase, medium chain;                                                                                                                                                                |
| N | Q8R197 | DE | Thioesterase II;                                                                                                                                                                                                      |
| N | Q8R197 | DE | Thioesterase domain-containing protein 1;                                                                                                                                                                             |
| N | Q8R197 | DR | fatty acid biosynthetic process                                                                                                                                                                                       |
| N | Q8R197 | DR | myristoyl-[acyl-carrier-protein] hydrolase activity                                                                                                                                                                   |
| N | Q8R197 | DR | oleoyl-[acyl-carrier-protein] hydrolase activity                                                                                                                                                                      |
| N | Q8R197 | DR | palmitoyl-[acyl-carrier-protein] hydrolase activity                                                                                                                                                                   |
| N | Q8R1C3 | CC | increases the transcriptional activity of NF-kappa-B by facilitating its nuclear translocation, DNA-binding and associated apoptotic response, when overexpressed (By similarity)                                     |
| N | Q8R1C3 | DE | EGFR-coamplified and overexpressed protein;                                                                                                                                                                           |
| N | Q8R1C3 | DE | Vesicular, overexpressed in cancer, prosurvival protein 1;                                                                                                                                                            |
| N | Q8R431 | CC | Converts monoacylglycerides to free fatty acids and glycerol hydrolyzes the endocannabinoid 2-arachidonoylglycerol, and thereby contributes                                                                           |
| N | Q8R431 | CC | to the regulation of endocannabinoid signaling, nociception and perception of pain                                                                                                                                    |
| N | Q8R431 | CC | Regulates the levels of fatty acids that serve as signaling molecules and promote cancer cell migration, invasion and tumor growth (By similarity).                                                                   |
| N | Q8R431 | DE | Monoacylglycerol lipase;                                                                                                                                                                                              |
| N | Q8R431 | DE | Monoglyceride lipase;                                                                                                                                                                                                 |
| N | Q8R431 | DR | acylglycerol catabolic process                                                                                                                                                                                        |
| N | Q8R431 | DR | acylglycerol lipase activity                                                                                                                                                                                          |
| N | Q8R431 | DR | arachidonic acid metabolic process                                                                                                                                                                                    |
| N | Q8R431 | DR | fatty acid biosynthetic process                                                                                                                                                                                       |
| N | Q8R431 | DR | lipid binding                                                                                                                                                                                                         |
| N | Q8R431 | DR | regulation of inflammatory response                                                                                                                                                                                   |
| N | Q8R431 | DR | regulation of sensory perception of pain                                                                                                                                                                              |
| N | Q8R431 | DR | regulation of signal transduction                                                                                                                                                                                     |
| N | Q8R6I7 | DE | UPF0236 protein<br>TTE0033/TTE0744/TTE0838/TTE0852/TTE1082/TTE1247/TTE1519/TTE1678/TTE1739/TTE1823/TTE2212;                                                                                                           |
| N | Q8R749 | CC | Cell wall formation (By similarity).                                                                                                                                                                                  |
| N | Q8R749 | DE | UDP-N-acetylmuramate--L-alanine ligase;                                                                                                                                                                               |
| N | Q8R749 | DE | UDP-N-acetylmuramoyl-L-alanine synthetase;                                                                                                                                                                            |
| N | Q8R749 | DR | UDP-N-acetylmuramate-L-alanine ligase activity                                                                                                                                                                        |
| N | Q8R749 | DR | cell division                                                                                                                                                                                                         |
| N | Q8R749 | DR | cellular cell wall organization                                                                                                                                                                                       |
| N | Q8R749 | DR | peptidoglycan biosynthetic process                                                                                                                                                                                    |
| N | Q8R749 | DR | regulation of cell shape                                                                                                                                                                                              |
| N | Q8R933 | DE | Uncharacterized RNA methyltransferase TTE1797;                                                                                                                                                                        |
| N | Q8R933 | DR | 4 iron, 4 sulfur cluster binding                                                                                                                                                                                      |
| N | Q8R933 | DR | RNA methyltransferase activity                                                                                                                                                                                        |
| N | Q8R933 | DR | RNA processing                                                                                                                                                                                                        |
| N | Q8R933 | DR | metal ion binding                                                                                                                                                                                                     |
| N | Q8R9R6 | DE | Dihydroorotase;                                                                                                                                                                                                       |
| N | Q8R9R6 | DE | dihydroorotase activity                                                                                                                                                                                               |
| N | Q8R9R6 | DR | metal ion binding                                                                                                                                                                                                     |
| N | Q8R9R6 | DR | pyrimidine nucleotide biosynthetic process                                                                                                                                                                            |
| N | Q8RDQ4 | CC | Cell wall formation (By similarity).                                                                                                                                                                                  |
| N | Q8RDQ4 | DE | D-Ala-D-Ala ligase;                                                                                                                                                                                                   |
| N | Q8RDQ4 | DE | D-alanine--D-alanine ligase;                                                                                                                                                                                          |
| N | Q8RDQ4 | DE | D-alanylalanine synthetase;                                                                                                                                                                                           |
| N | Q8RDQ4 | DR | D-alanine-D-alanine ligase activity                                                                                                                                                                                   |
| N | Q8RDQ4 | DR | cellular cell wall organization                                                                                                                                                                                       |
| N | Q8RDQ4 | DR | metal ion binding                                                                                                                                                                                                     |
| N | Q8RDQ4 | DR | peptidoglycan biosynthetic process                                                                                                                                                                                    |
| N | Q8RDQ4 | DR | regulation of cell shape                                                                                                                                                                                              |
| N | Q8RY83 | DE | Probable purine permease 13;                                                                                                                                                                                          |
| N | Q8RY83 | DR | purine base transmembrane transporter activity                                                                                                                                                                        |
| N | Q8S8M5 | CC | Involved in regulation of actin and microtubule organization                                                                                                                                                          |
| N | Q8S8M5 | CC | Part of a WAVE complex that activates the Arp2/3 complex (By similarity).                                                                                                                                             |
| N | Q8S8M5 | DE | Abl interactor-like protein 1;                                                                                                                                                                                        |

|   |        |    |                                                                                                                                                                 |
|---|--------|----|-----------------------------------------------------------------------------------------------------------------------------------------------------------------|
| N | Q8S8M5 | DE | Protein ABIL1;                                                                                                                                                  |
| N | Q8S8M5 | DR | protein binding                                                                                                                                                 |
| N | Q8SR53 | CC | molecular chaperone; assists the folding of proteins upon ATP hydrolysis (By similarity)                                                                        |
| N | Q8SR53 | DE | T-complex protein 1 subunit eta;                                                                                                                                |
| N | Q8SR53 | DR | protein folding                                                                                                                                                 |
| N | Q8SR53 | DR | unfolded protein binding                                                                                                                                        |
| N | Q8SRC3 | CC | Signal-recognition-particle assembly has a crucial role in targeting secretory proteins to the rough endoplasmic reticulum membrane                             |
| N | Q8SRC3 | CC | It must be involved intimately in the translocation of a wide variety of protein substrates (By similarity).                                                    |
| N | Q8SRC3 | DE | Signal recognition particle SEC65 subunit;                                                                                                                      |
| N | Q8SRC3 | DR | 7S RNA binding                                                                                                                                                  |
| N | Q8SRC3 | DR | SRP-dependent cotranslational protein targeting to membrane                                                                                                     |
| N | Q8SSG3 | CC | Core component of nucleosome                                                                                                                                    |
| N | Q8SSG3 | CC | DNA accessibility is regulated via a complex set of post-translational modifications of histones, also called histone code, and nucleosome remodeling.          |
| N | Q8SSG3 | CC | Histones thereby play a central role in transcription regulation, DNA repair, DNA replication and chromosomal stability                                         |
| N | Q8SSG3 | CC | Nucleosomes wrap and compact DNA into chromatin, limiting DNA accessibility to the cellular machineries which require DNA as a template                         |
| N | Q8SSG3 | DE | Histone H2A;                                                                                                                                                    |
| N | Q8SSG3 | DR | sequence-specific DNA binding                                                                                                                                   |
| N | Q8SW18 | DE | Homeobox protein HD-10;                                                                                                                                         |
| N | Q8SW18 | DR | regulation of transcription, DNA-dependent                                                                                                                      |
| N | Q8SW18 | DR | sequence-specific DNA binding                                                                                                                                   |
| N | Q8SW18 | DR | sequence-specific DNA binding transcription factor activity                                                                                                     |
| N | Q8SW79 | DE | UPF0328 protein ECU03_0080;                                                                                                                                     |
| N | Q8SWA6 | DE | Homeobox protein HD-11;                                                                                                                                         |
| N | Q8SWA6 | DR | regulation of transcription, DNA-dependent                                                                                                                      |
| N | Q8SWA6 | DR | sequence-specific DNA binding                                                                                                                                   |
| N | Q8SWA6 | DR | sequence-specific DNA binding transcription factor activity                                                                                                     |
| N | Q8SWA6 | DR | transcription regulator activity                                                                                                                                |
| N | Q8T2Q0 | DE | Putative ZDHHC-type palmitoyltransferase 6;                                                                                                                     |
| N | Q8T2Q0 | DE | Zinc finger DHHC domain-containing protein 6;                                                                                                                   |
| N | Q8T2Q0 | DR | acyltransferase activity                                                                                                                                        |
| N | Q8T2Q0 | DR | zinc ion binding                                                                                                                                                |
| N | Q8T498 | CC | Probable GTPase-activating protein, which may act as a negative regulator for some member of the Ras family                                                     |
| N | Q8T498 | CC | They decrease the signaling activity of Ras by stimulating its intrinsic GTPase activity, thereby lowering the levels of GTP-bound, active Ras (By similarity). |
| N | Q8T498 | DE | Probable Ras GTPase-activating protein;                                                                                                                         |
| N | Q8T498 | DR | GTPase activator activity                                                                                                                                       |
| N | Q8T498 | DR | inter-male aggressive behavior                                                                                                                                  |
| N | Q8T498 | DR | negative regulation of Ras protein signal transduction                                                                                                          |
| N | Q8T498 | DR | protein binding                                                                                                                                                 |
| N | Q8T498 | DR | signal transduction                                                                                                                                             |
| N | Q8TAE8 | CC | Acts as a negative regulator of G1 to S cell cycle phase progression by inhibiting cyclin-dependent kinases                                                     |
| N | Q8TAE8 | CC | Acts as a repressor of the orphan nuclear receptor NR4A1 by inhibiting AB domain-mediated transcriptional activity                                              |
| N | Q8TAE8 | CC | Inhibitory effects are additive with GADD45 proteins but occurs also in the absence of GADD45 proteins                                                          |
| N | Q8TAE8 | CC | may be involved in the hormone-mediated regulation of NR4A1 transcriptional activity.                                                                           |
| N | Q8TAE8 | DE | CKII beta-associating protein;                                                                                                                                  |
| N | Q8TAE8 | DE | CR6-interacting factor 1;                                                                                                                                       |
| N | Q8TAE8 | DE | Growth arrest and DNA damage-inducible proteins-interacting protein 1;                                                                                          |
| N | Q8TAE8 | DE | Papillomavirus L2-interacting nuclear protein 1;                                                                                                                |
| N | Q8TAE8 | DE | p53-responsive gene 6 protein;                                                                                                                                  |
| N | Q8TAE8 | DR | interspecies interaction between organisms                                                                                                                      |
| N | Q8TAE8 | DR | protein binding                                                                                                                                                 |
| N | Q8TF32 | CC | May be involved in transcriptional regulation.                                                                                                                  |
| N | Q8TF32 | DE | Zinc finger protein 431;                                                                                                                                        |
| N | Q8TF32 | DR | regulation of transcription, DNA-dependent                                                                                                                      |
| N | Q8TF32 | DR | zinc ion binding                                                                                                                                                |
| N | Q8TFG8 | DE | Putative uncharacterized membrane protein PB15E9.02c;                                                                                                           |

|   |        |    |                                                                                                                                                                                                                                                                                         |
|---|--------|----|-----------------------------------------------------------------------------------------------------------------------------------------------------------------------------------------------------------------------------------------------------------------------------------------|
| N | Q8THJ9 | DE | Acetylglutamate kinase;                                                                                                                                                                                                                                                                 |
| N | Q8THJ9 | DE | N-acetyl-L-glutamate 5-phosphotransferase;                                                                                                                                                                                                                                              |
| N | Q8THJ9 | DR | acetylglutamate kinase activity                                                                                                                                                                                                                                                         |
| N | Q8THJ9 | DR | arginine biosynthetic process                                                                                                                                                                                                                                                           |
| N | Q8TIY5 | CC | Structure-specific nuclease with 5'-flap endonuclease and 5'-3' exonuclease activities involved in DNA replication and repair                                                                                                                                                           |
| N | Q8TIY5 | CC | Acts as a genome stabilization factor that prevents flaps from equilibrating into structures that lead to duplications and deletions                                                                                                                                                    |
| N | Q8TIY5 | CC | Also involved in the base excision repair (BER) pathway                                                                                                                                                                                                                                 |
| N | Q8TIY5 | CC | Also possesses 5'-3' exonuclease activity on nicked or gapped double-stranded DNA (By similarity).                                                                                                                                                                                      |
| N | Q8TIY5 | CC | Binds the unpaired 3'-DNA end and kinks the DNA to facilitate 5' cleavage specificity.                                                                                                                                                                                                  |
| N | Q8TIY5 | CC | Cleaves one nucleotide into the double-stranded DNA from the junction in flap DNA, leaving a nick for ligation                                                                                                                                                                          |
| N | Q8TIY5 | CC | During DNA replication, cleaves the 5'-overhanging flap structure that is generated by displacement synthesis when DNA polymerase encounters the 5'-end of a downstream Okazaki fragment                                                                                                |
| N | Q8TIY5 | DE | Flap endonuclease 1;                                                                                                                                                                                                                                                                    |
| N | Q8TIY5 | DE | Flap structure-specific endonuclease 1;                                                                                                                                                                                                                                                 |
| N | Q8TIY5 | DR | DNA replication                                                                                                                                                                                                                                                                         |
| N | Q8TIY5 | DR | endonuclease activity                                                                                                                                                                                                                                                                   |
| N | Q8TIY5 | DR | exonuclease activity                                                                                                                                                                                                                                                                    |
| N | Q8TIY5 | DR | metal ion binding                                                                                                                                                                                                                                                                       |
| N | Q8TLP3 | CC | The beta subunit is responsible for the synthesis of L- tryptophan from indole and L-serine.                                                                                                                                                                                            |
| N | Q8TLP3 | DE | Tryptophan synthase beta chain 1;                                                                                                                                                                                                                                                       |
| N | Q8TLP3 | DR | pyridoxal phosphate binding                                                                                                                                                                                                                                                             |
| N | Q8TLP3 | DR | tryptophan synthase activity                                                                                                                                                                                                                                                            |
| N | Q8TPW4 | CC | Catalyzes the synthesis of the hydroxymethylpyrimidine phosphate (HMP-P) moiety of thiamine from aminoimidazole ribotide (AIR) in a radical S-adenosyl-L-methionine (SAM)-dependent reaction (By similarity).                                                                           |
| N | Q8TPW4 | DE | HMP-P synthase 1;                                                                                                                                                                                                                                                                       |
| N | Q8TPW4 | DE | HMP-phosphate synthase 1;                                                                                                                                                                                                                                                               |
| N | Q8TPW4 | DE | HMPP synthase 1;                                                                                                                                                                                                                                                                        |
| N | Q8TPW4 | DE | Hydroxymethylpyrimidine phosphate synthase 1;                                                                                                                                                                                                                                           |
| N | Q8TPW4 | DE | Phosphomethylpyrimidine synthase 1;                                                                                                                                                                                                                                                     |
| N | Q8TPW4 | DE | Thiamine biosynthesis protein thiC 1;                                                                                                                                                                                                                                                   |
| N | Q8TPW4 | DR | 4 iron, 4 sulfur cluster binding                                                                                                                                                                                                                                                        |
| N | Q8TPW4 | DR | lyase activity                                                                                                                                                                                                                                                                          |
| N | Q8TPW4 | DR | metal ion binding                                                                                                                                                                                                                                                                       |
| N | Q8TPW4 | DR | thiamine biosynthetic process                                                                                                                                                                                                                                                           |
| N | Q8TRK8 | DE | P-Rib-PP synthase;                                                                                                                                                                                                                                                                      |
| N | Q8TRK8 | DE | PRPP synthase;                                                                                                                                                                                                                                                                          |
| N | Q8TRK8 | DE | Phosphoribosyl pyrophosphate synthase;                                                                                                                                                                                                                                                  |
| N | Q8TRK8 | DE | Ribose-phosphate pyrophosphokinase;                                                                                                                                                                                                                                                     |
| N | Q8TRK8 | DR | kinase activity                                                                                                                                                                                                                                                                         |
| N | Q8TRK8 | DR | magnesium ion binding                                                                                                                                                                                                                                                                   |
| N | Q8TRK8 | DR | nucleoside metabolic process                                                                                                                                                                                                                                                            |
| N | Q8TRK8 | DR | nucleotide biosynthetic process                                                                                                                                                                                                                                                         |
| N | Q8TRK8 | DR | ribose phosphate diphosphokinase activity                                                                                                                                                                                                                                               |
| N | Q8TRU7 | CC | One of the primary rRNA binding proteins, it binds directly near the 3'-end of the 23S rRNA, where it nucleates assembly of the 50S subunit (By similarity).                                                                                                                            |
| N | Q8TRU7 | DE | 50S ribosomal protein L3P;                                                                                                                                                                                                                                                              |
| N | Q8TRU7 | DR | structural constituent of ribosome                                                                                                                                                                                                                                                      |
| N | Q8TS38 | CC | Catalyzes the NAD-dependent oxidative cleavage of spermidine and the subsequent transfer of the butylamine moiety of spermidine to the epsilon-amino group of a specific lysine residue of the eIF-5A precursor protein to form the intermediate deoxyhypusine residue (By similarity). |
| N | Q8TS38 | DE | Probable deoxyhypusine synthase 1;                                                                                                                                                                                                                                                      |
| N | Q8TS38 | DR | deoxyhypusine synthase activity                                                                                                                                                                                                                                                         |
| N | Q8TS38 | DR | peptidyl-lysine modification to hypusine                                                                                                                                                                                                                                                |
| N | Q8TS38 | DR | spermidine catabolic process to deoxyhypusine, using deoxyhypusine synthase                                                                                                                                                                                                             |
| N | Q8TS62 | DE | Histidine--tRNA ligase;                                                                                                                                                                                                                                                                 |
| N | Q8TS62 | DE | Histidyl-tRNA synthetase;                                                                                                                                                                                                                                                               |
| N | Q8TS62 | DR | histidine-tRNA ligase activity                                                                                                                                                                                                                                                          |

|   |        |    |                                                                                                                                                                                                                                    |
|---|--------|----|------------------------------------------------------------------------------------------------------------------------------------------------------------------------------------------------------------------------------------|
| N | Q8TS62 | DR | histidyl-tRNA aminoacylation                                                                                                                                                                                                       |
| N | Q8TS66 | CC | Joins Ado-cobinamide-GDP and alpha-ribazole to generate adenosylcobalamin (Ado-cobalamin) (By similarity).                                                                                                                         |
| N | Q8TS66 | DE | Cobalamin synthase;                                                                                                                                                                                                                |
| N | Q8TS66 | DR | cobalamin 5'-phosphate synthase activity                                                                                                                                                                                           |
| N | Q8TS66 | DR | cobalamin biosynthetic process                                                                                                                                                                                                     |
| N | Q8TWY3 | CC | Catalyzes the radical-mediated transfer of the hydroxybenzyl group from 4-hydroxyphenylpyruvate (HPP) to 5-amino-6-ribitylamino-2,4(1H,3H)-pyrimidinedione to form 7,8-didemethyl-8-hydroxy-5-deazariboflavin (FO) (By similarity) |
| N | Q8TWY3 | DE | 7,8-didemethyl-8-hydroxy-5-deazariboflavin synthase subunit 1;                                                                                                                                                                     |
| N | Q8TWY3 | DE | FO synthase subunit 1;                                                                                                                                                                                                             |
| N | Q8TWY3 | DR | 4 iron, 4 sulfur cluster binding                                                                                                                                                                                                   |
| N | Q8TWY3 | DR | coenzyme biosynthetic process                                                                                                                                                                                                      |
| N | Q8TWY3 | DR | metal ion binding                                                                                                                                                                                                                  |
| N | Q8TWY3 | DR | transferase activity, transferring alkyl or aryl (other than methyl) groups                                                                                                                                                        |
| N | Q8TXF4 | CC | Part of a complex that catalyzes the reversible cleavage of acetyl-CoA, allowing autotrophic growth from CO(2) (By similarity).                                                                                                    |
| N | Q8TXF4 | DE | ACDS complex acyltransferase;                                                                                                                                                                                                      |
| N | Q8TXF4 | DE | ACDS complex subunit beta;                                                                                                                                                                                                         |
| N | Q8TXF4 | DE | Acetyl-CoA decarbonylase/synthase complex subunit beta;                                                                                                                                                                            |
| N | Q8TXF4 | DR | acetyl-CoA metabolic process                                                                                                                                                                                                       |
| N | Q8TXF4 | DR | acyltransferase activity                                                                                                                                                                                                           |
| N | Q8TXF4 | DR | carbon-monoxide dehydrogenase (acceptor) activity                                                                                                                                                                                  |
| N | Q8TXF4 | DR | iron-sulfur cluster binding                                                                                                                                                                                                        |
| N | Q8TXF4 | DR | metal ion binding                                                                                                                                                                                                                  |
| N | Q8TY87 | DE | 30S ribosomal protein S27e;                                                                                                                                                                                                        |
| N | Q8TY87 | DR | metal ion binding                                                                                                                                                                                                                  |
| N | Q8TY87 | DR | structural constituent of ribosome                                                                                                                                                                                                 |
| N | Q8TZD9 | DE | 30S ribosomal protein S15P/S13e;                                                                                                                                                                                                   |
| N | Q8TZD9 | DR | structural constituent of ribosome                                                                                                                                                                                                 |
| N | Q8U147 | CC | Catalyzes the NAD(P)H-dependent reduction of dihydroxyacetonephosphate (DHAP or glyceraldehyde phosphate) to glycerol-1-phosphate (G1P)                                                                                            |
| N | Q8U147 | CC | The G1P thus generated is used as the glycerophosphate backbone of phospholipids in the cellular membranes of Archaea (By similarity).                                                                                             |
| N | Q8U147 | DE | Enantiomeric glycerophosphate synthase;                                                                                                                                                                                            |
| N | Q8U147 | DE | G1P dehydrogenase;                                                                                                                                                                                                                 |
| N | Q8U147 | DE | Glycerol-1-phosphate dehydrogenase [NAD(P)+];                                                                                                                                                                                      |
| N | Q8U147 | DE | sn-glycerol-1-phosphate dehydrogenase;                                                                                                                                                                                             |
| N | Q8U147 | DR | glycerol-1-phosphate dehydrogenase [NAD(P)+] activity                                                                                                                                                                              |
| N | Q8U147 | DR | metal ion binding                                                                                                                                                                                                                  |
| N | Q8U147 | DR | oxidation-reduction process                                                                                                                                                                                                        |
| N | Q8U147 | DR | phospholipid biosynthetic process                                                                                                                                                                                                  |
| N | Q8U259 | DE | Probable L-threonine 3-dehydrogenase;                                                                                                                                                                                              |
| N | Q8U259 | DR | L-threonine 3-dehydrogenase activity                                                                                                                                                                                               |
| N | Q8U259 | DR | oxidation-reduction process                                                                                                                                                                                                        |
| N | Q8U259 | DR | threonine catabolic process                                                                                                                                                                                                        |
| N | Q8U259 | DR | zinc ion binding                                                                                                                                                                                                                   |
| N | Q8U2L3 | DE | 50S ribosomal protein L34e;                                                                                                                                                                                                        |
| N | Q8U2L3 | DR | structural constituent of ribosome                                                                                                                                                                                                 |
| N | Q8U9K5 | CC | The ruvA-ruvB complex in the presence of ATP renatures cruciform structure in supercoiled DNA with palindromic sequence, indicating that it may promote strand exchange reactions in homologous recombination                      |
| N | Q8U9K5 | CC | RuvA stimulates, in the presence of DNA, the weak ATPase activity of ruvB (By similarity).                                                                                                                                         |
| N | Q8U9K5 | CC | RuvAB is an helicase that mediates the Holliday junction migration by localized denaturation and reannealing                                                                                                                       |
| N | Q8U9K5 | DE | Holliday junction ATP-dependent DNA helicase ruvA;                                                                                                                                                                                 |
| N | Q8U9K5 | DR | DNA recombination                                                                                                                                                                                                                  |
| N | Q8U9K5 | DR | four-way junction helicase activity                                                                                                                                                                                                |
| N | Q8UJ92 | DE | Pantothenate kinase;                                                                                                                                                                                                               |
| N | Q8UJ92 | DE | Pantothenic acid kinase;                                                                                                                                                                                                           |
| N | Q8UJ92 | DR | coenzyme A biosynthetic process                                                                                                                                                                                                    |
| N | Q8UJ92 | DR | pantothenate kinase activity                                                                                                                                                                                                       |
| N | Q8UN02 | CC | Seems to be important for efficient replication in vivo.                                                                                                                                                                           |
| N | Q8UN02 | DE | Glycosylated Gag polyprotein;                                                                                                                                                                                                      |

|   |        |    |                                                                                                                                                                                                           |
|---|--------|----|-----------------------------------------------------------------------------------------------------------------------------------------------------------------------------------------------------------|
| N | Q8UN02 | DE | Nextended-MA-p12;                                                                                                                                                                                         |
| N | Q8UN02 | DR | nucleic acid binding                                                                                                                                                                                      |
| N | Q8UN02 | DR | structural molecule activity                                                                                                                                                                              |
| N | Q8UN02 | DR | virion assembly                                                                                                                                                                                           |
| N | Q8UN02 | DR | zinc ion binding                                                                                                                                                                                          |
| N | Q8UUH9 | CC | PA2 catalyzes the calcium-dependent hydrolysis of the 2- acyl groups in 3-sn-phosphoglycerides                                                                                                            |
| N | Q8UUH9 | CC | Acts presynaptically (By similarity).                                                                                                                                                                     |
| N | Q8UUH9 | CC | Inhibits neuromuscular transmission by blocking acetylcholine release from the nerve termini                                                                                                              |
| N | Q8UUH9 | DE | Phosphatidylcholine 2-acylhydrolase;                                                                                                                                                                      |
| N | Q8UUH9 | DE | Phospholipase A2 PC9;                                                                                                                                                                                     |
| N | Q8UUH9 | DR | calcium ion binding                                                                                                                                                                                       |
| N | Q8UUH9 | DR | lipid catabolic process                                                                                                                                                                                   |
| N | Q8UUH9 | DR | phospholipase A2 activity                                                                                                                                                                                 |
| N | Q8UUH9 | DR | phospholipid metabolic process                                                                                                                                                                            |
| N | Q8UUI2 | CC | PA2 catalyzes the calcium-dependent hydrolysis of the 2- acyl groups in 3-sn-phosphoglycerides (By similarity).                                                                                           |
| N | Q8UUI2 | DE | Phosphatidylcholine 2-acylhydrolase;                                                                                                                                                                      |
| N | Q8UUI2 | DE | Phospholipase A2 PC16;                                                                                                                                                                                    |
| N | Q8UUI2 | DR | calcium ion binding                                                                                                                                                                                       |
| N | Q8UUI2 | DR | lipid catabolic process                                                                                                                                                                                   |
| N | Q8UUI2 | DR | phospholipase A2 activity                                                                                                                                                                                 |
| N | Q8UUI2 | DR | phospholipid metabolic process                                                                                                                                                                            |
| N | Q8UW74 | CC | Transcriptional repressor                                                                                                                                                                                 |
| N | Q8UW74 | CC | Demarcates the prospective midbrain-hindbrain boundary (MHB) region in the neuroectoderm in early gastrulae embryos by repressing transcription of a number of target genes.                              |
| N | Q8UW74 | CC | Represses transcription from both TATA-box- and TATA-box-containing promoters (By similarity).                                                                                                            |
| N | Q8UW74 | DE | HES-related protein 1-A';                                                                                                                                                                                 |
| N | Q8UW74 | DE | HES-related protein 1-A;                                                                                                                                                                                  |
| N | Q8UW74 | DE | Hairy and enhancer of split 7.1-A;                                                                                                                                                                        |
| N | Q8UW74 | DE | Transcription factor HES-7.1-A;                                                                                                                                                                           |
| N | Q8UW74 | DR | midbrain-hindbrain boundary development                                                                                                                                                                   |
| N | Q8UW74 | DR | negative regulation of transcription from RNA polymerase II promoter                                                                                                                                      |
| N | Q8UW74 | DR | transcription repressor activity                                                                                                                                                                          |
| N | Q8V9S9 | CC | Plays an essential role in the assembly of the icosahedral capsid of the virus (By similarity).                                                                                                           |
| N | Q8V9S9 | DE | Protein B602L;                                                                                                                                                                                            |
| N | Q8VCF5 | DE | Oculospanin;                                                                                                                                                                                              |
| N | Q8VCF5 | DE | Tetraspanin-10;                                                                                                                                                                                           |
| N | Q8VDQ9 | DE | Protein KRI1 homolog;                                                                                                                                                                                     |
| N | Q8VHK9 | CC | Plays a role in degradation and deadenylation of mRNAs containing in their 3'-UTR the consensus ARE sequence element                                                                                      |
| N | Q8VHK9 | CC | May function in sex development and spermatogenesis (By similarity).                                                                                                                                      |
| N | Q8VHK9 | DE | DEAH box protein 36;                                                                                                                                                                                      |
| N | Q8VHK9 | DE | MLE-like protein 1;                                                                                                                                                                                       |
| N | Q8VHK9 | DE | Probable ATP-dependent RNA helicase DHX36;                                                                                                                                                                |
| N | Q8VHK9 | DE | RNA helicase associated with AU-rich element ARE;                                                                                                                                                         |
| N | Q8VHK9 | DR | ATP-dependent helicase activity                                                                                                                                                                           |
| N | Q8VHK9 | DR | nucleic acid binding                                                                                                                                                                                      |
| N | Q8VS92 | DE | Gal-1-P uridylyltransferase;                                                                                                                                                                              |
| N | Q8VS92 | DE | Galactose-1-phosphate uridylyltransferase;                                                                                                                                                                |
| N | Q8VS92 | DE | UDP-glucose--hexose-1-phosphate uridylyltransferase;                                                                                                                                                      |
| N | Q8VS92 | DR | UDP-glucose:hexose-1-phosphate uridylyltransferase activity                                                                                                                                               |
| N | Q8VS92 | DR | galactose metabolic process                                                                                                                                                                               |
| N | Q8VXV7 | CC | Probable histone demethylase that reduces the levels of histone H3 'Lys-4' methylation in chromatin of the floral repressor FLOWERING LOCUS C (FLC) and the sporophytically silenced floral repressor FWA |
| N | Q8VXV7 | CC | Required for cytosine methylation of FWA.                                                                                                                                                                 |
| N | Q8VXV7 | CC | Seems to act in partial redundancy with FLOWERING LOCUS D (FLD) to repress FLC expression                                                                                                                 |
| N | Q8VXV7 | DE | Flavin-containing amine oxidase domain-containing protein 1;                                                                                                                                              |
| N | Q8VXV7 | DE | Lysine-specific histone demethylase 1 homolog 1;                                                                                                                                                          |
| N | Q8VXV7 | DE | Protein LSD1-LIKE 1;                                                                                                                                                                                      |

|   |        |    |                                                                                                                                                                                                                                       |
|---|--------|----|---------------------------------------------------------------------------------------------------------------------------------------------------------------------------------------------------------------------------------------|
| N | Q8VXV7 | DR | histone H3-K4 methylation                                                                                                                                                                                                             |
| N | Q8VXV7 | DR | histone deacetylation                                                                                                                                                                                                                 |
| N | Q8VXV7 | DR | oxidation-reduction process                                                                                                                                                                                                           |
| N | Q8VXV7 | DR | oxidoreductase activity                                                                                                                                                                                                               |
| N | Q8VXV7 | DR | root development                                                                                                                                                                                                                      |
| N | Q8VZ87 | CC | The light-harvesting complex (LHC) functions as a light receptor, it captures and delivers excitation energy to photosystems with which it is closely associated.                                                                     |
| N | Q8VZ87 | DE | Chlorophyll a-b binding protein 3, chloroplastic;                                                                                                                                                                                     |
| N | Q8VZ87 | DE | Chlorophyll a-b protein 180;                                                                                                                                                                                                          |
| N | Q8VZ87 | DE | LHCII type I CAB-3;                                                                                                                                                                                                                   |
| N | Q8VZ87 | DR | chlorophyll binding                                                                                                                                                                                                                   |
| N | Q8VZ87 | DR | metal ion binding                                                                                                                                                                                                                     |
| N | Q8VZ87 | DR | photosynthesis, light harvesting                                                                                                                                                                                                      |
| N | Q8VZ87 | DR | protein-chromophore linkage                                                                                                                                                                                                           |
| N | Q8W9N6 | CC | Core subunit of the mitochondrial membrane respiratory chain NADH dehydrogenase (Complex I) that is believed to belong to the minimal assembly complex for initiation in the transfer of electrons from NADH to the respiratory chain |
| N | Q8W9N6 | CC | The immediate electron acceptor for the enzyme is believed to be ubiquinone (By similarity).                                                                                                                                          |
| N | Q8W9N6 | DE | NADH dehydrogenase subunit 1;                                                                                                                                                                                                         |
| N | Q8W9N6 | DE | NADH-ubiquinone oxidoreductase chain 1;                                                                                                                                                                                               |
| N | Q8W9N6 | DR | NADH dehydrogenase (ubiquinone) activity                                                                                                                                                                                              |
| N | Q8W9N6 | DR | electron transport chain                                                                                                                                                                                                              |
| N | Q8WJN0 | CC | Usually encoded in the trnK tRNA gene intron                                                                                                                                                                                          |
| N | Q8WJN0 | CC | probably assists in splicing its own and other chloroplast group II introns (By similarity)                                                                                                                                           |
| N | Q8WJN0 | DE | Intron maturase;                                                                                                                                                                                                                      |
| N | Q8WJN0 | DR | mRNA processing                                                                                                                                                                                                                       |
| N | Q8WJN0 | DR | tRNA processing                                                                                                                                                                                                                       |
| N | Q8WJR3 | CC | Usually encoded in the trnK tRNA gene intron                                                                                                                                                                                          |
| N | Q8WJR3 | CC | probably assists in splicing its own and other chloroplast group II introns (By similarity)                                                                                                                                           |
| N | Q8WJR3 | DE | Intron maturase;                                                                                                                                                                                                                      |
| N | Q8WJR3 | DR | mRNA processing                                                                                                                                                                                                                       |
| N | Q8WJR3 | DR | tRNA processing                                                                                                                                                                                                                       |
| N | Q8WMN5 | CC | Constitutes one of the E3 ubiquitin-protein ligases that mediate monoubiquitination of 'Lys-119' of histone H2A, thereby playing a central role in histone code and gene regulation                                                   |
| N | Q8WMN5 | CC | Compared to RNF2/RING2, it does not have the main E3 ubiquitin ligase activity on histone H2A, and it may rather act as a modulator of RNF2/RING2 activity (By similarity).                                                           |
| N | Q8WMN5 | CC | Essential component of the Polycomb group (PcG) multiprotein PRC1 complex, a complex required to maintain the transcriptionally repressive state of many genes, including Hox genes, throughout development                           |
| N | Q8WMN5 | CC | H2A 'Lys-119' ubiquitination gives a specific tag for epigenetic transcriptional repression and participates in X chromosome inactivation of female mammals                                                                           |
| N | Q8WMN5 | CC | PcG PRC1 complex act via chromatin remodeling and modification of histones, rendering chromatin heritably changed in its expressibility                                                                                               |
| N | Q8WMN5 | DE | E3 ubiquitin-protein ligase RING1;                                                                                                                                                                                                    |
| N | Q8WMN5 | DE | Polycomb complex protein RING1;                                                                                                                                                                                                       |
| N | Q8WMN5 | DE | RING finger protein 1;                                                                                                                                                                                                                |
| N | Q8WMN5 | DR | zinc ion binding                                                                                                                                                                                                                      |
| N | Q8WZN6 | CC | Protamines substitute for histones in the chromatin of sperm during the haploid phase of spermatogenesis                                                                                                                              |
| N | Q8WZN6 | CC | They compact sperm DNA into a highly condensed, stable and inactive complex (By similarity).                                                                                                                                          |
| N | Q8WZN6 | DE | Sperm protamine P1;                                                                                                                                                                                                                   |
| N | Q8WZN6 | DR | cell differentiation                                                                                                                                                                                                                  |
| N | Q8WZN6 | DR | chromosome condensation                                                                                                                                                                                                               |
| N | Q8WZN6 | DR | multicellular organismal development                                                                                                                                                                                                  |
| N | Q8WZN6 | DR | spermatogenesis                                                                                                                                                                                                                       |
| N | Q8WUJ3 | CC | May be involved in hearing.                                                                                                                                                                                                           |
| N | Q8WUJ3 | DE | Protein KIAA1199;                                                                                                                                                                                                                     |
| N | Q8WVI0 | DE | UPF0640 protein C3orf78;                                                                                                                                                                                                              |
| N | Q8WWV6 | CC | Functions as a receptor for the Fc fragment of IgA and IgM                                                                                                                                                                            |
| N | Q8WWV6 | CC | Binds IgA and IgM with high affinity and mediates their endocytosis                                                                                                                                                                   |
| N | Q8WWV6 | CC | May function in the immune response to microbes mediated by IgA and IgM.                                                                                                                                                              |



|   |        |    |                                                                                                                                                                                                                                |
|---|--------|----|--------------------------------------------------------------------------------------------------------------------------------------------------------------------------------------------------------------------------------|
| N | Q8WWV6 | DE | CD351;                                                                                                                                                                                                                         |
| N | Q8WWV6 | DE | Fc alpha/mu receptor;                                                                                                                                                                                                          |
| N | Q8WWV6 | DE | High affinity immunoglobulin alpha and immunoglobulin mu Fc receptor;                                                                                                                                                          |
| N | Q8WWV6 | DR | receptor activity                                                                                                                                                                                                              |
| N | Q8WXC6 | DE | Myeloma-overexpressed gene 2 protein;                                                                                                                                                                                          |
| N | Q8WXG9 | CC | Receptor that may have an important role in the development of the central nervous system.                                                                                                                                     |
| N | Q8WXG9 | DE | G-protein coupled receptor 98;                                                                                                                                                                                                 |
| N | Q8WXG9 | DE | Monogenic audiogenic seizure susceptibility protein 1 homolog;                                                                                                                                                                 |
| N | Q8WXG9 | DE | Usher syndrome type-2C protein;                                                                                                                                                                                                |
| N | Q8WXG9 | DE | Very large G-protein coupled receptor 1;                                                                                                                                                                                       |
| N | Q8WXG9 | DR | G-protein coupled receptor activity                                                                                                                                                                                            |
| N | Q8WXG9 | DR | calcium ion binding                                                                                                                                                                                                            |
| N | Q8WXG9 | DR | cell communication                                                                                                                                                                                                             |
| N | Q8WXG9 | DR | cell-cell adhesion                                                                                                                                                                                                             |
| N | Q8WXG9 | DR | maintenance of organ identity                                                                                                                                                                                                  |
| N | Q8WXG9 | DR | neuropeptide signaling pathway                                                                                                                                                                                                 |
| N | Q8WXG9 | DR | photoreceptor cell maintenance                                                                                                                                                                                                 |
| N | Q8X485 | CC | Involved in the degradation and recycling of damaged RNA                                                                                                                                                                       |
| N | Q8X485 | CC | It is used as a target for degradation by the ATR-dependent protease La (By similarity).                                                                                                                                       |
| N | Q8X485 | DE | Endoribonuclease symE;                                                                                                                                                                                                         |
| N | Q8X485 | DR | RNA metabolic process                                                                                                                                                                                                          |
| N | Q8X485 | DR | endoribonuclease activity                                                                                                                                                                                                      |
| N | Q8X6T2 | CC | Interacts with the secY protein in vivo                                                                                                                                                                                        |
| N | Q8X6T2 | CC | May bind preferentially to an uncomplexed state of secY, thus functioning either as a chelating agent for excess secY in the cell or as a regulatory factor that negatively controls the translocase function (By similarity). |
| N | Q8X6T2 | DE | Protein syd;                                                                                                                                                                                                                   |
| N | Q8X711 | CC | Cell wall formation (By similarity).                                                                                                                                                                                           |
| N | Q8X711 | DE | UDP-N-acetylenolpyruvoylglucosamine reductase;                                                                                                                                                                                 |
| N | Q8X711 | DE | UDP-N-acetylmuramate dehydrogenase;                                                                                                                                                                                            |
| N | Q8X711 | DR | UDP-N-acetylmuramate dehydrogenase activity                                                                                                                                                                                    |
| N | Q8X711 | DR | cell division                                                                                                                                                                                                                  |
| N | Q8X711 | DR | cellular cell wall organization                                                                                                                                                                                                |
| N | Q8X711 | DR | flavin adenine dinucleotide binding                                                                                                                                                                                            |
| N | Q8X711 | DR | oxidation-reduction process                                                                                                                                                                                                    |
| N | Q8X711 | DR | peptidoglycan biosynthetic process                                                                                                                                                                                             |
| N | Q8X711 | DR | regulation of cell shape                                                                                                                                                                                                       |
| N | Q8X8H6 | CC | Phosphorylation of dTMP to form dTDP in both de novo and salvage pathways of dTTP synthesis (By similarity).                                                                                                                   |
| N | Q8X8H6 | DE | Thymidylate kinase;                                                                                                                                                                                                            |
| N | Q8X8H6 | DE | dTMP kinase;                                                                                                                                                                                                                   |
| N | Q8X8H6 | DR | dTDP biosynthetic process                                                                                                                                                                                                      |
| N | Q8X8H6 | DR | thymidylate kinase activity                                                                                                                                                                                                    |
| N | Q8XA01 | CC | Catalyzes the isomerization between 2-isopropylmalate and 3-isopropylmalate, via the formation of 2-isopropylmaleate.                                                                                                          |
| N | Q8XA01 | DE | 3-isopropylmalate dehydratase small subunit;                                                                                                                                                                                   |
| N | Q8XA01 | DE | Alpha-IPM isomerase;                                                                                                                                                                                                           |
| N | Q8XA01 | DE | Isopropylmalate isomerase;                                                                                                                                                                                                     |
| N | Q8XA01 | DR | 3-isopropylmalate dehydratase activity                                                                                                                                                                                         |
| N | Q8XA01 | DR | leucine biosynthetic process                                                                                                                                                                                                   |
| N | Q8XAY9 | CC | Part of the ABC transporter complex IslABCD involved in autoinducer 2 (AI-2) import                                                                                                                                            |
| N | Q8XAY9 | CC | Binds AI-2 and delivers it to the LsrC and LsrD permeases (By similarity).                                                                                                                                                     |
| N | Q8XAY9 | DE | AI-2-binding protein LsrB;                                                                                                                                                                                                     |
| N | Q8XAY9 | DE | Autoinducer 2-binding protein LsrB;                                                                                                                                                                                            |
| N | Q8XBY1 | CC | Part of a cation efflux system that mediates resistance to copper and silver (By similarity).                                                                                                                                  |
| N | Q8XBY1 | DE | Cation efflux system protein CusA;                                                                                                                                                                                             |
| N | Q8XBY1 | DR | cation transmembrane transporter activity                                                                                                                                                                                      |
| N | Q8XBY1 | DR | copper ion transport                                                                                                                                                                                                           |
| N | Q8XJP2 | CC | Might take part in the signal recognition particle (SRP) pathway                                                                                                                                                               |
| N | Q8XJP2 | CC | May be a regulatory protein.                                                                                                                                                                                                   |
| N | Q8XJP2 | CC | This is inferred from the conservation of its genetic proximity to ftsY/ffh                                                                                                                                                    |
| N | Q8XJP2 | DE | UPF0122 protein CPE1714;                                                                                                                                                                                                       |
| N | Q8XJP2 | DR | regulation of transcription, DNA-dependent                                                                                                                                                                                     |

|   |        |    |                                                                                                                                                                                                                                                                                                           |
|---|--------|----|-----------------------------------------------------------------------------------------------------------------------------------------------------------------------------------------------------------------------------------------------------------------------------------------------------------|
| N | Q8XJP2 | DR | sequence-specific DNA binding transcription factor activity                                                                                                                                                                                                                                               |
| N | Q8XJP2 | DR | sigma factor activity                                                                                                                                                                                                                                                                                     |
| N | Q8XJP2 | DR | transcription initiation, DNA-dependent                                                                                                                                                                                                                                                                   |
| N | Q8XJZ6 | DE | Peptide methionine sulfoxide reductase MsrB;                                                                                                                                                                                                                                                              |
| N | Q8XJZ6 | DE | Peptide-methionine (R)-S-oxide reductase;                                                                                                                                                                                                                                                                 |
| N | Q8XJZ6 | DR | oxidation-reduction process                                                                                                                                                                                                                                                                               |
| N | Q8XJZ6 | DR | peptide-methionine (R)-S-oxide reductase activity                                                                                                                                                                                                                                                         |
| N | Q8XJZ6 | DR | peptide-methionine-(S)-S-oxide reductase activity                                                                                                                                                                                                                                                         |
| N | Q8XKF6 | DE | UPF0213 protein CPE1444;                                                                                                                                                                                                                                                                                  |
| N | Q8XKF6 | DR | nuclease activity                                                                                                                                                                                                                                                                                         |
| N | Q8XKT3 | DE | DegV domain-containing protein CPE1310;                                                                                                                                                                                                                                                                   |
| N | Q8XKU7 | CC | Binds specifically to the ssrA RNA (tmRNA) and is required for stable association of ssrA with ribosomes (By similarity).                                                                                                                                                                                 |
| N | Q8XKU7 | DE | SsrA-binding protein;                                                                                                                                                                                                                                                                                     |
| N | Q8XLG8 | CC | Involved in saturated fatty acids biosynthesis.                                                                                                                                                                                                                                                           |
| N | Q8XLG8 | DE | (3R)-hydroxymyristoyl ACP dehydrase;                                                                                                                                                                                                                                                                      |
| N | Q8XLG8 | DE | (3R)-hydroxymyristoyl-[acyl-carrier-protein] dehydratase;                                                                                                                                                                                                                                                 |
| N | Q8XLG8 | DR | fatty acid biosynthetic process                                                                                                                                                                                                                                                                           |
| N | Q8XLG8 | DR | hydro-lyase activity                                                                                                                                                                                                                                                                                      |
| N | Q8XLG8 | DR | lipid A biosynthetic process                                                                                                                                                                                                                                                                              |
| N | Q8XPD7 | DE | DegV domain-containing protein CPE0026;<br>Catalyzes the formation of the alpha-1,6-glucosidic linkages in glycogen by scission of a 1,4-alpha-linked oligosaccharide from growing alpha-1,4-glucan chains and the subsequent attachment of the oligosaccharide to the alpha-1,6 position (By similarity) |
| N | Q8XT76 | CC |                                                                                                                                                                                                                                                                                                           |
| N | Q8XT76 | DE | 1,4-alpha-D-glucan:1,4-alpha-D-glucan 6-glucosyl-transferase;                                                                                                                                                                                                                                             |
| N | Q8XT76 | DE | 1,4-alpha-glucan-branching enzyme;                                                                                                                                                                                                                                                                        |
| N | Q8XT76 | DE | Glycogen-branching enzyme;                                                                                                                                                                                                                                                                                |
| N | Q8XT76 | DR | 1,4-alpha-glucan branching enzyme activity                                                                                                                                                                                                                                                                |
| N | Q8XT76 | DR | cation binding                                                                                                                                                                                                                                                                                            |
| N | Q8XT76 | DR | glycogen biosynthetic process                                                                                                                                                                                                                                                                             |
| N | Q8XT76 | DR | hydrolase activity, hydrolyzing O-glycosyl compounds                                                                                                                                                                                                                                                      |
| N | Q8XV20 | DE | 50S ribosomal protein L29;                                                                                                                                                                                                                                                                                |
| N | Q8XV20 | DR | structural constituent of ribosome                                                                                                                                                                                                                                                                        |
| N | Q8XV22 | CC | Binds to 23S rRNA                                                                                                                                                                                                                                                                                         |
| N | Q8XV22 | CC | Forms part of two intersubunit bridges in the 70S ribosome (By similarity).                                                                                                                                                                                                                               |
| N | Q8XV22 | DE | 50S ribosomal protein L14;                                                                                                                                                                                                                                                                                |
| N | Q8XV22 | DR | structural constituent of ribosome                                                                                                                                                                                                                                                                        |
| N | Q8XW52 | DE | AIR synthase;                                                                                                                                                                                                                                                                                             |
| N | Q8XW52 | DE | Phosphoribosyl-aminoimidazole synthetase;                                                                                                                                                                                                                                                                 |
| N | Q8XW52 | DE | Phosphoribosylformylglycinamide cyclo-ligase;                                                                                                                                                                                                                                                             |
| N | Q8XW52 | DR | 'de novo' IMP biosynthetic process                                                                                                                                                                                                                                                                        |
| N | Q8XW52 | DR | phosphoribosylformylglycinamide cyclo-ligase activity                                                                                                                                                                                                                                                     |
| N | Q8XZR1 | CC | Participates in the degradation of poly-3- hydroxybutyrate (PHB)<br>It works downstream of poly(3- hydroxybutyrate) depolymerase, hydrolyzing D(-)-3-hydroxybutyrate oligomers of various length (3HB-oligomers) into 3HB-monomers (By similarity).                                                       |
| N | Q8XZR1 | CC |                                                                                                                                                                                                                                                                                                           |
| N | Q8XZR1 | DE | 3HB-oligomer hydrolase;                                                                                                                                                                                                                                                                                   |
| N | Q8XZR1 | DE | D(-)-3-hydroxybutyrate oligomer hydrolase;                                                                                                                                                                                                                                                                |
| N | Q8XZR1 | DR | butyrate metabolic process                                                                                                                                                                                                                                                                                |
| N | Q8XZR1 | DR | hydroxybutyrate-dimer hydrolase activity                                                                                                                                                                                                                                                                  |
| N | Q8XZV4 | CC | Responsible for synthesis of pseudouridine from uracil- 55 in the psi GC loop of transfer RNAs (By similarity).                                                                                                                                                                                           |
| N | Q8XZV4 | DE | Psi55 synthase;                                                                                                                                                                                                                                                                                           |
| N | Q8XZV4 | DE | tRNA pseudouridine 55 synthase;                                                                                                                                                                                                                                                                           |
| N | Q8XZV4 | DE | tRNA pseudouridine synthase B;                                                                                                                                                                                                                                                                            |
| N | Q8XZV4 | DE | tRNA pseudouridylate synthase;                                                                                                                                                                                                                                                                            |
| N | Q8XZV4 | DE | tRNA-uridine isomerase;                                                                                                                                                                                                                                                                                   |
| N | Q8XZV4 | DR | pseudouridine synthase activity                                                                                                                                                                                                                                                                           |
| N | Q8XZV4 | DR | pseudouridine synthesis                                                                                                                                                                                                                                                                                   |
| N | Q8XZV4 | DR | tRNA processing                                                                                                                                                                                                                                                                                           |
| N | Q8Y449 | CC | Catalyzes the reversible transfer of the terminal phosphate group between ATP and AMP                                                                                                                                                                                                                     |
| N | Q8Y449 | CC | This small ubiquitous enzyme involved in the energy metabolism and nucleotide synthesis, is essential for maintenance and cell growth (By similarity).                                                                                                                                                    |
| N | Q8Y449 | DE | ATP-AMP transphosphorylase;                                                                                                                                                                                                                                                                               |

|   |        |    |                                                                                                                                                                                                                                                               |
|---|--------|----|---------------------------------------------------------------------------------------------------------------------------------------------------------------------------------------------------------------------------------------------------------------|
| N | Q8Y449 | DE | Adenylate kinase;                                                                                                                                                                                                                                             |
| N | Q8Y449 | DR | adenylate kinase activity                                                                                                                                                                                                                                     |
| N | Q8Y495 | CC | Catalyzes the ATP-dependent amination of UTP to CTP with either L-glutamine or ammonia as the source of nitrogen (By similarity).                                                                                                                             |
| N | Q8Y495 | DE | CTP synthase;                                                                                                                                                                                                                                                 |
| N | Q8Y495 | DE | CTP synthetase;                                                                                                                                                                                                                                               |
| N | Q8Y495 | DE | UTP--ammonia ligase;                                                                                                                                                                                                                                          |
| N | Q8Y495 | DR | CTP synthase activity                                                                                                                                                                                                                                         |
| N | Q8Y495 | DR | glutamine metabolic process                                                                                                                                                                                                                                   |
| N | Q8Y495 | DR | pyrimidine nucleotide biosynthetic process                                                                                                                                                                                                                    |
| N | Q8Y611 | CC | Endonuclease that resolves Holliday junction intermediates in genetic recombination                                                                                                                                                                           |
| N | Q8Y611 | CC | Creates multiple four-strand junctions by introducing symmetrical nicks in paired strands                                                                                                                                                                     |
| N | Q8Y611 | CC | Promotes annealing of linear ssDNA with homologous dsDNA                                                                                                                                                                                                      |
| N | Q8Y611 | CC | Required for DNA repair, homologous recombination and chromosome segregation (By similarity).                                                                                                                                                                 |
| N | Q8Y611 | DE | Holliday junction resolvase recU;                                                                                                                                                                                                                             |
| N | Q8Y611 | DE | Recombination protein U homolog;                                                                                                                                                                                                                              |
| N | Q8Y611 | DR | DNA recombination                                                                                                                                                                                                                                             |
| N | Q8Y611 | DR | endonuclease activity                                                                                                                                                                                                                                         |
| N | Q8Y611 | DR | metal ion binding                                                                                                                                                                                                                                             |
| N | Q8Y6U0 | CC | Catalyzes the ATP-dependent transfer of a sulfur to tRNA to produce 4-thiouridine in position 8 of tRNAs, which functions as a near-UV photosensor                                                                                                            |
| N | Q8Y6U0 | CC | Also catalyzes the transfer of sulfur to the sulfur carrier protein ThiS, forming ThiS-thiocarboxylate                                                                                                                                                        |
| N | Q8Y6U0 | CC | The sulfur is donated as persulfide by iscS (By similarity).                                                                                                                                                                                                  |
| N | Q8Y6U0 | CC | This is a step in the synthesis of thiazole, in the thiamine biosynthesis pathway                                                                                                                                                                             |
| N | Q8Y6U0 | DE | Probable tRNA sulfurtransferase;                                                                                                                                                                                                                              |
| N | Q8Y6U0 | DE | Sulfur carrier protein ThiS sulfurtransferase;                                                                                                                                                                                                                |
| N | Q8Y6U0 | DE | Thiamine biosynthesis protein thiI;                                                                                                                                                                                                                           |
| N | Q8Y6U0 | DE | tRNA 4-thiouridine synthase;                                                                                                                                                                                                                                  |
| N | Q8Y6U0 | DR | thiamine biosynthetic process                                                                                                                                                                                                                                 |
| N | Q8Y6U0 | DR | transferase activity                                                                                                                                                                                                                                          |
| N | Q8Y7J7 | CC | DNA-binding protein that represses the expression of many genes that are induced as cells make the transition from rapid exponential growth to stationary phase (By similarity)                                                                               |
| N | Q8Y7J7 | CC | At low GTP concentration it no longer binds GTP and stop to act as a transcriptional repressor (By similarity).                                                                                                                                               |
| N | Q8Y7J7 | CC | It is a GTP-binding protein that senses the intracellular GTP concentration as an indicator of nutritional limitations                                                                                                                                        |
| N | Q8Y7J7 | DE | GTP-sensing transcriptional pleiotropic repressor CodY;                                                                                                                                                                                                       |
| N | Q8Y7J7 | DR | regulation of transcription, DNA-dependent                                                                                                                                                                                                                    |
| N | Q8Y7J7 | DR | sequence-specific DNA binding transcription factor activity                                                                                                                                                                                                   |
| N | Q8Y7J7 | DR | transcription repressor activity                                                                                                                                                                                                                              |
| N | Q8YCY1 | DE | Ornithine cyclodeaminase;                                                                                                                                                                                                                                     |
| N | Q8YCY1 | DR | arginine metabolic process                                                                                                                                                                                                                                    |
| N | Q8YCY1 | DR | ornithine cyclodeaminase activity                                                                                                                                                                                                                             |
| N | Q8YDR6 | CC | Probably part of an ABC transporter complex.                                                                                                                                                                                                                  |
| N | Q8YDR6 | DE | Putative binding protein BMEII1019;                                                                                                                                                                                                                           |
| N | Q8YDR6 | DR | sulfur compound metabolic process                                                                                                                                                                                                                             |
| N | Q8YGN1 | DE | FGAM synthase II;                                                                                                                                                                                                                                             |
| N | Q8YGN1 | DE | Phosphoribosylformylglycinamide synthase 2;                                                                                                                                                                                                                   |
| N | Q8YGN1 | DE | Phosphoribosylformylglycinamide synthase II;                                                                                                                                                                                                                  |
| N | Q8YGN1 | DR | 'de novo' IMP biosynthetic process                                                                                                                                                                                                                            |
| N | Q8YGN1 | DR | phosphoribosylformylglycinamide synthase activity                                                                                                                                                                                                             |
| N | Q8YHH3 | CC | Generates undecaprenyl pyrophosphate (UPP) from isopentenyl pyrophosphate (IPP); is the precursor of glycosyl carrier lipid in the biosynthesis of bacterial cell wall polysaccharide components such as peptidoglycan and lipopolysaccharide (By similarity) |
| N | Q8YHH3 | DE | Di-trans,poly-cis-decaprenylcistransferase;                                                                                                                                                                                                                   |
| N | Q8YHH3 | DE | UPP synthase;                                                                                                                                                                                                                                                 |
| N | Q8YHH3 | DE | Undecaprenyl diphosphate synthase;                                                                                                                                                                                                                            |
| N | Q8YHH3 | DE | Undecaprenyl pyrophosphate synthase;                                                                                                                                                                                                                          |
| N | Q8YHH3 | DR | cell division                                                                                                                                                                                                                                                 |
| N | Q8YHH3 | DR | cellular cell wall organization                                                                                                                                                                                                                               |
| N | Q8YHH3 | DR | di-trans,poly-cis-decaprenylcistransferase activity                                                                                                                                                                                                           |
| N | Q8YHH3 | DR | peptidoglycan biosynthetic process                                                                                                                                                                                                                            |
| N | Q8YHH3 | DR | regulation of cell shape                                                                                                                                                                                                                                      |

|   |        |    |                                                                                                                                                                                                                               |
|---|--------|----|-------------------------------------------------------------------------------------------------------------------------------------------------------------------------------------------------------------------------------|
| N | Q8YIT2 | CC | Part of the ABC transporter complex MacAB involved in macrolide export                                                                                                                                                        |
| N | Q8YIT2 | CC | Transmembrane domains (TMD) form a pore in the inner membrane and the ATP-binding domain (NBD) is responsible for energy generation (By similarity).                                                                          |
| N | Q8YIT2 | DE | Macrolide export ATP-binding/permease protein MacB;                                                                                                                                                                           |
| N | Q8YIT2 | DR | ATPase activity                                                                                                                                                                                                               |
| N | Q8YIT2 | DR | hydrolase activity, acting on acid anhydrides, catalyzing transmembrane movement of substances                                                                                                                                |
| N | Q8YIT2 | DR | response to antibiotic                                                                                                                                                                                                        |
| N | Q8YJ42 | CC | Transaldolase is important for the balance of metabolites in the pentose-phosphate pathway (By similarity).                                                                                                                   |
| N | Q8YJ42 | DE | Probable transaldolase;                                                                                                                                                                                                       |
| N | Q8YJ42 | DR | pentose-phosphate shunt                                                                                                                                                                                                       |
| N | Q8YJ42 | DR | sedoheptulose-7-phosphate-D-glyceraldehyde-5-phosphate glyceroneoaminase                                                                                                                                                      |
| N | Q8YLZ0 | CC | 2,3-bisphosphoglycerate, which displays some tRNA 5'-processing endonuclease activity.                                                                                                                                        |
| N | Q8YLZ0 | CC | Probably involved in tRNA maturation, by removing a 3'-trailer from precursor tRNA (By similarity).                                                                                                                           |
| N | Q8YLZ0 | DE | Ribonuclease Z;                                                                                                                                                                                                               |
| N | Q8YLZ0 | DE | tRNA 3' endonuclease;                                                                                                                                                                                                         |
| N | Q8YLZ0 | DR | endoribonuclease activity, producing 5'-phosphomonoesters                                                                                                                                                                     |
| N | Q8YLZ0 | DR | metal ion binding                                                                                                                                                                                                             |
| N | Q8YLZ0 | DR | tRNA 3'-trailer cleavage                                                                                                                                                                                                      |
| N | Q8YM38 | CC | Involved in the synthesis of meso-diaminopimelate (m-DAP or DL-DAP), required for both lysine and peptidoglycan biosynthesis                                                                                                  |
| N | Q8YM38 | CC | Catalyzes the direct conversion of tetrahydrodipicolinate to LL-diaminopimelate, a reaction that requires three enzymes in E.coli (By similarity).                                                                            |
| N | Q8YM38 | DE | DAP-aminotransferase 1;                                                                                                                                                                                                       |
| N | Q8YM38 | DE | LL-DAP-aminotransferase 1;                                                                                                                                                                                                    |
| N | Q8YM38 | DE | LL-diaminopimelate aminotransferase 1;                                                                                                                                                                                        |
| N | Q8YM38 | DR | L,L-diaminopimelate aminotransferase activity                                                                                                                                                                                 |
| N | Q8YM38 | DR | biosynthetic process                                                                                                                                                                                                          |
| N | Q8YM38 | DR | pyridoxal phosphate binding                                                                                                                                                                                                   |
| N | Q8YP43 | CC | Cleaves peptides in various proteins in a process that requires ATP hydrolysis                                                                                                                                                |
| N | Q8YP43 | CC | Has a chymotrypsin-like activity                                                                                                                                                                                              |
| N | Q8YP43 | CC | Plays a major role in the degradation of misfolded proteins (By similarity).                                                                                                                                                  |
| N | Q8YP43 | DE | Endopeptidase Clp 3;                                                                                                                                                                                                          |
| N | Q8YP43 | DE | Probable ATP-dependent Clp protease proteolytic subunit 3;                                                                                                                                                                    |
| N | Q8YP43 | DR | serine-type endopeptidase activity                                                                                                                                                                                            |
| N | Q8YPK0 | DE | 50S ribosomal protein L36;                                                                                                                                                                                                    |
| N | Q8YPK0 | DR | structural constituent of ribosome                                                                                                                                                                                            |
| N | Q8YU89 | CC | Catalyzes the hydrolysis of 1,4-dihydroxy-2-naphthoyl- CoA (DHNA-CoA) to 1,4-dihydroxy-2-naphthoate (DHNA), a reaction involved in phyloquinone (vitamin K1) biosynthesis (By similarity).                                    |
| N | Q8YU89 | DE | 1,4-dihydroxy-2-naphthoyl-CoA hydrolase;                                                                                                                                                                                      |
| N | Q8YU89 | DE | DHNA-CoA hydrolase;                                                                                                                                                                                                           |
| N | Q8YU89 | DE | DHNA-CoA thioesterase;                                                                                                                                                                                                        |
| N | Q8YU89 | DR | thiolester hydrolase activity                                                                                                                                                                                                 |
| N | Q8YYI9 | CC | Transfers the fatty acyl group on membrane lipoproteins (By similarity).                                                                                                                                                      |
| N | Q8YYI9 | DE | ALP N-acyltransferase;                                                                                                                                                                                                        |
| N | Q8YYI9 | DE | Apolipoprotein N-acyltransferase;                                                                                                                                                                                             |
| N | Q8YYI9 | DR | N-acyltransferase activity                                                                                                                                                                                                    |
| N | Q8YYI9 | DR | hydrolase activity, acting on carbon-nitrogen (but not peptide) bonds                                                                                                                                                         |
| N | Q8YYI9 | DR | lipoprotein biosynthetic process                                                                                                                                                                                              |
| N | Q8YYI9 | DR | nitrogen compound metabolic process                                                                                                                                                                                           |
| N | Q8YZ99 | CC | Thiolesterase that catalyzes the hydrolysis of S-D- lactoyl- glutathione to form glutathione and D-lactic acid (By similarity).                                                                                               |
| N | Q8YZ99 | DE | Glyoxalase II;                                                                                                                                                                                                                |
| N | Q8YZ99 | DE | Hydroxyacylglutathione hydrolase;                                                                                                                                                                                             |
| N | Q8YZ99 | DR | hydroxyacylglutathione hydrolase activity                                                                                                                                                                                     |
| N | Q8YZ99 | DR | zinc ion binding                                                                                                                                                                                                              |
| N | Q8YZI3 | CC | Cell wall formation                                                                                                                                                                                                           |
| N | Q8YZI3 | CC | Catalyzes the transfer of a GlcNAc subunit on undecaprenyl-pyrophosphoryl-MurNAc-pentapeptide (lipid intermediate I) to form undecaprenyl-pyrophosphoryl-MurNAc- (pentapeptide)GlcNAc (lipid intermediate II) (By similarity) |
| N | Q8YZI3 | DE | UDP-N-acetylglucosamine--N-acetylmuramyl-(pentapeptide) pyrophosphoryl-undecaprenol N-acetylglucosamine transferase;                                                                                                          |

|   |        |    |                                                                                                                                                                                                                                         |
|---|--------|----|-----------------------------------------------------------------------------------------------------------------------------------------------------------------------------------------------------------------------------------------|
| N | Q8YZI3 | DE | Undecaprenyl-PP-MurNAc-pentapeptide-UDPGlcNAc GlcNAc transferase;                                                                                                                                                                       |
| N | Q8YZI3 | DR | UDP-N-acetyl-D-glucosamine:N-acetylmuramoyl-L-alanyl-D-glutamyl-meso-2,6-diaminopimelyl-D-alanyl-D-alanine-diphosphoundecaprenol 4-beta-N-acetylglucosaminyltransferase activity                                                        |
| N | Q8YZI3 | DR | UDP-N-acetylgalactosamine biosynthetic process                                                                                                                                                                                          |
| N | Q8YZI3 | DR | carbohydrate binding                                                                                                                                                                                                                    |
| N | Q8YZI3 | DR | cell division                                                                                                                                                                                                                           |
| N | Q8YZI3 | DR | cellular cell wall organization                                                                                                                                                                                                         |
| N | Q8YZI3 | DR | lipid glycosylation                                                                                                                                                                                                                     |
| N | Q8YZI3 | DR | peptidoglycan biosynthetic process                                                                                                                                                                                                      |
| N | Q8YZI3 | DR | regulation of cell shape                                                                                                                                                                                                                |
| N | Q8YZI3 | DR | undecaprenyldiphospho-muramoylpentapeptide beta-N-acetylglucosaminyltransferase activity                                                                                                                                                |
| N | Q8Z075 | CC | NDH-1 shuttles electrons from NAD(P)H, via FMN and iron- sulfur (Fe-S) centers, to quinones in the respiratory chain                                                                                                                    |
| N | Q8Z075 | CC | Couples the redox reaction to proton translocation (for every two electrons transferred, four hydrogen ions are translocated across the cytoplasmic membrane), and thus conserves the redox energy in a proton gradient (By similarity) |
| N | Q8Z075 | CC | The immediate electron acceptor for the enzyme in this species is believed to be plastoquinone                                                                                                                                          |
| N | Q8Z075 | DE | NAD(P)H dehydrogenase I, chain 6;                                                                                                                                                                                                       |
| N | Q8Z075 | DE | NAD(P)H-quinone oxidoreductase chain 6;                                                                                                                                                                                                 |
| N | Q8Z075 | DE | NDH-1, chain 6;                                                                                                                                                                                                                         |
| N | Q8Z075 | DR | NADH dehydrogenase (ubiquinone) activity                                                                                                                                                                                                |
| N | Q8Z075 | DR | oxidation-reduction process                                                                                                                                                                                                             |
| N | Q8Z075 | DR | quinone binding                                                                                                                                                                                                                         |
| N | Q8Z0U8 | CC | Increases the formation of ribosomal termination complexes and stimulates activities of RF-1 and RF-2                                                                                                                                   |
| N | Q8Z0U8 | CC | It binds guanine nucleotides and has strong preference for UGA stop codons                                                                                                                                                              |
| N | Q8Z0U8 | CC | It may interact directly with the ribosome                                                                                                                                                                                              |
| N | Q8Z0U8 | CC | The stimulation of RF- 1 and RF-2 is significantly reduced by GTP and GDP, but not by GMP (By similarity).                                                                                                                              |
| N | Q8Z0U8 | DE | Peptide chain release factor 3;                                                                                                                                                                                                         |
| N | Q8Z0U8 | DR | GTPase activity                                                                                                                                                                                                                         |
| N | Q8Z0U8 | DR | translation release factor activity, codon specific                                                                                                                                                                                     |
| N | Q8Z2F0 | CC | Catalyzes the interconversion of 2-phosphoglycerate and 3-phosphoglycerate (By similarity).                                                                                                                                             |
| N | Q8Z2F0 | DE | 2,3-bisphosphoglycerate-independent phosphoglycerate mutase;                                                                                                                                                                            |
| N | Q8Z2F0 | DE | BPG-independent PGAM;                                                                                                                                                                                                                   |
| N | Q8Z2F0 | DE | Phosphoglyceromutase;                                                                                                                                                                                                                   |
| N | Q8Z2F0 | DR | manganese ion binding                                                                                                                                                                                                                   |
| N | Q8Z2F0 | DR | phosphoglycerate mutase activity                                                                                                                                                                                                        |
| N | Q8Z2Q2 | CC | Catalyzes the first step in hexosamine metabolism, converting fructose-6P into glucosamine-6P using glutamine as a nitrogen source (By similarity).                                                                                     |
| N | Q8Z2Q2 | DE | D-fructose-6-phosphate amidotransferase;                                                                                                                                                                                                |
| N | Q8Z2Q2 | DE | Glucosamine--fructose-6-phosphate aminotransferase [isomerizing];                                                                                                                                                                       |
| N | Q8Z2Q2 | DE | Glucosamine-6-phosphate synthase;                                                                                                                                                                                                       |
| N | Q8Z2Q2 | DE | Hexosephosphate aminotransferase;                                                                                                                                                                                                       |
| N | Q8Z2Q2 | DE | L-glutamine-D-fructose-6-phosphate amidotransferase;                                                                                                                                                                                    |
| N | Q8Z2Q2 | DR | carbohydrate biosynthetic process                                                                                                                                                                                                       |
| N | Q8Z2Q2 | DR | glutamine metabolic process                                                                                                                                                                                                             |
| N | Q8Z2Q2 | DR | glutamine-fructose-6-phosphate transaminase (isomerizing) activity                                                                                                                                                                      |
| N | Q8Z2Q2 | DR | sugar binding                                                                                                                                                                                                                           |
| N | Q8Z2W6 | DE | CDP-diacylglycerol phosphatidylhydrolase;                                                                                                                                                                                               |
| N | Q8Z2W6 | DE | CDP-diacylglycerol pyrophosphatase;                                                                                                                                                                                                     |
| N | Q8Z2W6 | DE | CDP-diglyceride hydrolase;                                                                                                                                                                                                              |
| N | Q8Z2W6 | DR | CDP-diacylglycerol diphosphatase activity                                                                                                                                                                                               |
| N | Q8Z2W6 | DR | phospholipid biosynthetic process                                                                                                                                                                                                       |
| N | Q8Z4W4 | CC | DNA ligase that catalyzes the formation of phosphodiester linkages between 5'-phosphoryl and 3'-hydroxyl groups in double-stranded DNA using NAD as a coenzyme and as the energy source for the reaction                                |
| N | Q8Z4W4 | CC | It is essential for DNA replication and repair of damaged DNA (By similarity).                                                                                                                                                          |
| N | Q8Z4W4 | DE | Polydeoxyribonucleotide synthase [NAD+];                                                                                                                                                                                                |
| N | Q8Z4W4 | DR | DNA ligase (NAD+) activity                                                                                                                                                                                                              |
| N | Q8Z4W4 | DR | DNA replication                                                                                                                                                                                                                         |

|   |        |    |                                                                                                                                                                                                                               |
|---|--------|----|-------------------------------------------------------------------------------------------------------------------------------------------------------------------------------------------------------------------------------|
| N | Q8Z4W4 | DR | metal ion binding                                                                                                                                                                                                             |
| N | Q8Z538 | CC | Catalyzes the transfer of the L-Ara4N moiety of the glycolipid undecaprenyl phosphate-alpha-L-Ara4N to lipid A                                                                                                                |
| N | Q8Z538 | CC | The modified arabinose is attached to lipid A and is required for resistance to polymyxin and cationic antimicrobial peptides.                                                                                                |
| N | Q8Z538 | DE | 4-amino-4-deoxy-L-arabinose lipid A transferase;                                                                                                                                                                              |
| N | Q8Z538 | DE | Lipid IV(A) 4-amino-4-deoxy-L-arabinosyltransferase;                                                                                                                                                                          |
| N | Q8Z538 | DE | Melittin resistance protein pqaB;                                                                                                                                                                                             |
| N | Q8Z538 | DE | Polymyxin resistance protein pmrK;                                                                                                                                                                                            |
| N | Q8Z538 | DE | Undecaprenyl phosphate-alpha-4-amino-4-deoxy-L-arabinose arabimosyl transferase;                                                                                                                                              |
| N | Q8Z538 | DE | Undecaprenyl phosphate-alpha-L-Ara4N transferase;                                                                                                                                                                             |
| N | Q8Z538 | DR | lipid A biosynthetic process                                                                                                                                                                                                  |
| N | Q8Z538 | DR | mannosyltransferase activity                                                                                                                                                                                                  |
| N | Q8Z538 | DR | protein O-linked glycosylation                                                                                                                                                                                                |
| N | Q8Z864 | CC | Part of the ABC transporter complex GsiABCD involved in glutathione import                                                                                                                                                    |
| N | Q8Z864 | CC | Responsible for energy coupling to the transport system (By similarity).                                                                                                                                                      |
| N | Q8Z864 | DE | Glutathione import ATP-binding protein GsiA;                                                                                                                                                                                  |
| N | Q8Z864 | DR | ATPase activity                                                                                                                                                                                                               |
| N | Q8Z864 | DR | peptide transport                                                                                                                                                                                                             |
| N | Q8Z8D2 | CC | Involved in base excision repair of DNA damaged by oxidation or by mutagenic agents                                                                                                                                           |
| N | Q8Z8D2 | CC | Acts as DNA glycosylase that recognizes and removes damaged bases                                                                                                                                                             |
| N | Q8Z8D2 | CC | Cleaves the DNA backbone by beta-delta elimination to generate a single-strand break at the site of the removed base with both 3'- and 5'- phosphates (By                                                                     |
| N | Q8Z8D2 | CC | Has 5'AP (apurinic/apyrimidinic) lyase activity and introduces nicks in the DNA strand                                                                                                                                        |
| N | Q8Z8D2 | CC | Has a preference for oxidized pyrimidines, such as thymine glycol, 5,6-dihydrouracil and 5,6-dihydrothymine                                                                                                                   |
| N | Q8Z8D2 | DE | DNA glycosylase/AP lyase Nei;                                                                                                                                                                                                 |
| N | Q8Z8D2 | DE | DNA-(apurinic or apyrimidinic site) lyase Nei;                                                                                                                                                                                |
| N | Q8Z8D2 | DE | Endonuclease 8;                                                                                                                                                                                                               |
| N | Q8Z8D2 | DE | Endonuclease VIII;                                                                                                                                                                                                            |
| N | Q8Z8D2 | DR | DNA-(apurinic or apyrimidinic site) lyase activity                                                                                                                                                                            |
| N | Q8Z8D2 | DR | base-excision repair                                                                                                                                                                                                          |
| N | Q8Z8D2 | DR | damaged DNA binding                                                                                                                                                                                                           |
| N | Q8Z8D2 | DR | hydrolase activity, hydrolyzing N-glycosyl compounds                                                                                                                                                                          |
| N | Q8Z8D2 | DR | nucleotide-excision repair                                                                                                                                                                                                    |
| N | Q8Z8D2 | DR | zinc ion binding                                                                                                                                                                                                              |
| N | Q8Z9C1 | DE | Sugar fermentation stimulation protein A;                                                                                                                                                                                     |
| N | Q8Z9E2 | CC | Catalyzes the production of spermidine from putrescine and decarboxylated S-adenosylmethionine (dcSAM), which serves as an aminopropyl donor (By similarity)                                                                  |
| N | Q8Z9E2 | DE | Putrescine aminopropyltransferase;                                                                                                                                                                                            |
| N | Q8Z9E2 | DE | Spermidine synthase;                                                                                                                                                                                                          |
| N | Q8Z9E2 | DR | spermidine biosynthetic process                                                                                                                                                                                               |
| N | Q8Z9E2 | DR | spermidine synthase activity                                                                                                                                                                                                  |
| N | Q8Z9G9 | CC | Cell wall formation                                                                                                                                                                                                           |
| N | Q8Z9G9 | CC | Catalyzes the transfer of a GlcNAc subunit on undecaprenyl-pyrophosphoryl-MurNAc-pentapeptide (lipid intermediate I) to form undecaprenyl-pyrophosphoryl-MurNAc- (pentapeptide)GlcNAc (lipid intermediate II) (By similarity) |
| N | Q8Z9G9 | DE | UDP-N-acetylglucosamine--N-acetylmuramyl-(pentapeptide) pyrophosphoryl-undecaprenol N-acetylglucosamine transferase;                                                                                                          |
| N | Q8Z9G9 | DE | Undecaprenyl-PP-MurNAc-pentapeptide-UDPGlcNAc GlcNAc transferase;                                                                                                                                                             |
| N | Q8Z9G9 | DR | UDP-N-acetyl-D-glucosamine:N-acetylmuramoyl-L-alanyl-D-glutamyl-meso-2,6-diaminopimelyl-D-alanyl-D-alanine-diphosphoundecaprenol 4-beta-N-acetylglucosaminyltransferase activity                                              |
| N | Q8Z9G9 | DR | UDP-N-acetylgalactosamine biosynthetic process                                                                                                                                                                                |
| N | Q8Z9G9 | DR | carbohydrate binding                                                                                                                                                                                                          |
| N | Q8Z9G9 | DR | cell division                                                                                                                                                                                                                 |
| N | Q8Z9G9 | DR | cellular cell wall organization                                                                                                                                                                                               |
| N | Q8Z9G9 | DR | lipid glycosylation                                                                                                                                                                                                           |
| N | Q8Z9G9 | DR | peptidoglycan biosynthetic process                                                                                                                                                                                            |
| N | Q8Z9G9 | DR | regulation of cell shape                                                                                                                                                                                                      |
| N | Q8Z9G9 | DR | undecaprenyldiphospho-muramoylpentapeptide beta-N-acetylglucosaminyltransferase activity                                                                                                                                      |
| N | Q8ZAH6 | CC | Conversion of glycerol 3-phosphate to dihydroxyacetone                                                                                                                                                                        |
| N | Q8ZAH6 | CC | Uses fumarate or nitrate as electron acceptor (By similarity).                                                                                                                                                                |
| N | Q8ZAH6 | DE | Anaerobic G-3-P dehydrogenase subunit B;                                                                                                                                                                                      |

|   |        |    |                                                                                                                                                                                                           |
|---|--------|----|-----------------------------------------------------------------------------------------------------------------------------------------------------------------------------------------------------------|
| N | Q8ZAH6 | DE | Anaerobic G3Pdhase B;                                                                                                                                                                                     |
| N | Q8ZAH6 | DE | Anaerobic glycerol-3-phosphate dehydrogenase subunit B;                                                                                                                                                   |
| N | Q8ZAH6 | DR | electron carrier activity                                                                                                                                                                                 |
| N | Q8ZAH6 | DR | oxidation-reduction process                                                                                                                                                                               |
| N | Q8ZAH6 | DR | sn-glycerol-3-phosphate:ubiquinone-8 oxidoreductase activity                                                                                                                                              |
| N | Q8ZDJ9 | DE | UPF0304 protein YPO2563/y1624/YP_2374;                                                                                                                                                                    |
| N | Q8ZG80 | CC | Necessary for the introduction of cis unsaturation into fatty acids                                                                                                                                       |
| N | Q8ZG80 | CC | Catalyzed the dehydration of (3R)-3-hydroxydecanoyl- ACP to E-(2)-decenoyl- ACP and then its isomerization to Z-(3)- decenoyl-ACP (By similarity).                                                        |
| N | Q8ZG80 | DE | 3-hydroxydecanoyl-[acyl-carrier-protein] dehydratase;                                                                                                                                                     |
| N | Q8ZG80 | DE | Beta-hydroxydecanoyl thioester dehydrase;                                                                                                                                                                 |
| N | Q8ZG80 | DR | 3-hydroxydecanoyl-[acyl-carrier-protein] dehydratase activity                                                                                                                                             |
| N | Q8ZG80 | DR | fatty acid biosynthetic process                                                                                                                                                                           |
| N | Q8ZHG8 | CC | Catalyzes the biosynthesis of agmatine from arginine (By similarity).                                                                                                                                     |
| N | Q8ZHG8 | DE | Biosynthetic arginine decarboxylase;                                                                                                                                                                      |
| N | Q8ZHG8 | DR | arginine catabolic process                                                                                                                                                                                |
| N | Q8ZHG8 | DR | arginine decarboxylase activity                                                                                                                                                                           |
| N | Q8ZHG8 | DR | metal ion binding                                                                                                                                                                                         |
| N | Q8ZHG8 | DR | putrescine biosynthetic process                                                                                                                                                                           |
| N | Q8ZHG8 | DR | spermidine biosynthetic process                                                                                                                                                                           |
| N | Q8ZIQ2 | DE | Purine nucleoside phosphorylase deoD-type;                                                                                                                                                                |
| N | Q8ZIQ2 | DR | nucleoside metabolic process                                                                                                                                                                              |
| N | Q8ZIQ2 | DR | purine-nucleoside phosphorylase activity                                                                                                                                                                  |
| N | Q8ZJH2 | CC | Necessary for efficient RNA polymerase transcription elongation past template-encoded arresting sites                                                                                                     |
| N | Q8ZJH2 | CC | Cleavage of the nascent transcript by cleavage factors such as greA or greB allows the resumption of elongation from the new 3'terminus                                                                   |
| N | Q8ZJH2 | CC | GreB releases sequences of up to 9 nucleotides in length (By similarity). The arresting sites in DNA have the property of trapping a certain fraction of                                                  |
| N | Q8ZJH2 | CC | elongating RNA polymerases that pass through, resulting in locked ternary complexes                                                                                                                       |
| N | Q8ZJH2 | DE | Transcript cleavage factor greB;                                                                                                                                                                          |
| N | Q8ZJH2 | DE | Transcription elongation factor greB;                                                                                                                                                                     |
| N | Q8ZJH2 | DR | transcription elongation regulator activity                                                                                                                                                               |
| N | Q8ZL42 | CC | Catalyzes the formation of phosphodiester linkages between 5'-phosphoryl and 3'-hydroxyl groups in double-stranded DNA using NAD as a coenzyme and as the energy source for the reaction (By similarity). |
| N | Q8ZL42 | DE | DNA ligase B;                                                                                                                                                                                             |
| N | Q8ZL42 | DE | Polydeoxyribonucleotide synthase [NAD+] B;                                                                                                                                                                |
| N | Q8ZL42 | DR | DNA ligase (NAD+) activity                                                                                                                                                                                |
| N | Q8ZL42 | DR | DNA replication                                                                                                                                                                                           |
| N | Q8ZLJ2 | CC | Necessary for efficient RNA polymerase transcription elongation past template-encoded arresting sites                                                                                                     |
| N | Q8ZLJ2 | CC | Cleavage of the nascent transcript by cleavage factors such as greA or greB allows the resumption of elongation from the new 3'terminus                                                                   |
| N | Q8ZLJ2 | CC | GreB releases sequences of up to 9 nucleotides in length (By similarity). The arresting sites in DNA have the property of trapping a certain fraction of                                                  |
| N | Q8ZLJ2 | CC | elongating RNA polymerases that pass through, resulting in locked ternary complexes                                                                                                                       |
| N | Q8ZLJ2 | DE | Transcript cleavage factor greB;                                                                                                                                                                          |
| N | Q8ZLJ2 | DE | Transcription elongation factor greB;                                                                                                                                                                     |
| N | Q8ZLJ2 | DR | transcription elongation regulator activity                                                                                                                                                               |
| N | Q8ZM46 | DE | UPF0235 protein yggU;                                                                                                                                                                                     |
| N | Q8ZNM4 | CC | Catalyzes the synthesis of dihydrouridine, a modified base found in the D-loop of most tRNAs (By similarity).                                                                                             |
| N | Q8ZNM4 | DE | tRNA-dihydrouridine synthase C;                                                                                                                                                                           |
| N | Q8ZNM4 | DR | flavin adenine dinucleotide binding                                                                                                                                                                       |
| N | Q8ZNM4 | DR | oxidation-reduction process                                                                                                                                                                               |
| N | Q8ZNM4 | DR | tRNA dihydrouridine synthase activity                                                                                                                                                                     |
| N | Q8ZNM4 | DR | tRNA processing                                                                                                                                                                                           |
| N | Q8ZTB7 | CC | Signal-recognition-particle assembly, binds directly to 7S RNA and mediates binding of the 54 kDa subunit of the SRP (By similarity).                                                                     |
| N | Q8ZTB7 | DE | Signal recognition particle 19 kDa protein;                                                                                                                                                               |
| N | Q8ZTB7 | DR | 7S RNA binding                                                                                                                                                                                            |
| N | Q8ZTB7 | DR | SRP-dependent cotranslational protein targeting to membrane                                                                                                                                               |
| N | Q8ZTY6 | CC | Involved in ribosome biogenesis; more specifically in 18S rRNA pseudouridylation and in cleavage of pre-rRNA (By similarity).                                                                             |

|   |        |    |                                                                                                                                                     |
|---|--------|----|-----------------------------------------------------------------------------------------------------------------------------------------------------|
| N | Q8ZTY6 | DE | Ribosome biogenesis protein Nop10;                                                                                                                  |
| N | Q8ZTY6 | DR | rRNA processing                                                                                                                                     |
| N | Q8ZVM1 | CC | Component of the proteasome core, a large protease complex with broad specificity involved in protein degradation (By similarity).                  |
| N | Q8ZVM1 | DE | 20S proteasome alpha subunit;                                                                                                                       |
| N | Q8ZVM1 | DE | Proteasome core protein PsmA;                                                                                                                       |
| N | Q8ZVM1 | DE | Proteasome subunit alpha;                                                                                                                           |
| N | Q8ZVM1 | DR | threonine-type endopeptidase activity                                                                                                               |
| N | Q8ZVM1 | DR | ubiquitin-dependent protein catabolic process                                                                                                       |
| N | Q8ZYK3 | CC | Part of the RFC clamp loader complex which loads the PCNA sliding clamp onto DNA (By similarity).                                                   |
| N | Q8ZYK3 | DE | Clamp loader large subunit;                                                                                                                         |
| N | Q8ZYK3 | DE | RFC large subunit;                                                                                                                                  |
| N | Q8ZYK3 | DE | Replication factor C large subunit;                                                                                                                 |
| N | Q8ZYK3 | DR | DNA replication                                                                                                                                     |
| N | Q8ZYK3 | DR | nucleoside-triphosphatase activity                                                                                                                  |
| N | Q90252 | CC | binds to mesotocin and may play a role in the regulation of water and salt transport                                                                |
| N | Q90252 | DE | Mesotocin receptor;                                                                                                                                 |
| N | Q90252 | DR | oxytocin receptor activity                                                                                                                          |
| N | Q90252 | DR | vasopressin receptor activity                                                                                                                       |
| N | Q90XG0 | DE | Triose-phosphate isomerase B;                                                                                                                       |
| N | Q90XG0 | DE | Triosephosphate isomerase B;                                                                                                                        |
| N | Q90XG0 | DR | fatty acid biosynthetic process                                                                                                                     |
| N | Q90XG0 | DR | gluconeogenesis                                                                                                                                     |
| N | Q90XG0 | DR | pentose-phosphate shunt                                                                                                                             |
| N | Q90XG0 | DR | triose-phosphate isomerase activity                                                                                                                 |
| N | Q90YB1 | CC | Efficiently joins single-strand breaks in a double- stranded polydeoxynucleotide in an ATP-dependent reaction                                       |
| N | Q90YB1 | CC | Involved in DNA nonhomologous end joining (NHEJ) required for double-strand break repair and V(D)J recombination (By similarity).                   |
| N | Q90YB1 | DE | DNA ligase 4;                                                                                                                                       |
| N | Q90YB1 | DE | DNA ligase IV;                                                                                                                                      |
| N | Q90YB1 | DE | Polydeoxyribonucleotide synthase [ATP] 4;                                                                                                           |
| N | Q90YB1 | DR | DNA ligase (ATP) activity                                                                                                                           |
| N | Q90YB1 | DR | DNA replication                                                                                                                                     |
| N | Q90YB1 | DR | cell division                                                                                                                                       |
| N | Q90YB1 | DR | metal ion binding                                                                                                                                   |
| N | Q90YC2 | CC | May play a role in gastrulation-related cell movement.                                                                                              |
| N | Q90YC2 | DE | Matrix metalloproteinase-21;                                                                                                                        |
| N | Q90YC2 | DR | calcium ion binding                                                                                                                                 |
| N | Q90YC2 | DR | metalloendopeptidase activity                                                                                                                       |
| N | Q90YC2 | DR | zinc ion binding                                                                                                                                    |
| N | Q90YR7 | DE | 40S ribosomal protein S7;                                                                                                                           |
| N | Q90YR7 | DR | structural constituent of ribosome                                                                                                                  |
| N | Q91090 | CC | The absence of paraoxonase activity in turkey and chicken blood and in turkey liver indicates that PON2, if expressed, does not hydrolyze paraoxon. |
| N | Q91090 | DE | A-esterase 2;                                                                                                                                       |
| N | Q91090 | DE | Aromatic esterase 2;                                                                                                                                |
| N | Q91090 | DE | Serum arylalkylphosphatase 2;                                                                                                                       |
| N | Q91090 | DE | Serum paraoxonase/arylesterase 2;                                                                                                                   |
| N | Q91090 | DR | arylalkylphosphatase activity                                                                                                                       |
| N | Q91090 | DR | arylesterase activity                                                                                                                               |
| N | Q91090 | DR | metal ion binding                                                                                                                                   |
| N | Q91364 | DE | Prolactin II;                                                                                                                                       |
| N | Q91364 | DE | Prolactin-2;                                                                                                                                        |
| N | Q91364 | DR | hormone activity                                                                                                                                    |
| N | Q91642 | CC | Hydrolyzes dipeptides containing N-terminal aspartate residues.                                                                                     |
| N | Q91642 | DE | Alpha-aspartyl dipeptidase;                                                                                                                         |
| N | Q91642 | DE | Asp-specific dipeptidase;                                                                                                                           |
| N | Q91642 | DE | Dipeptidase E;                                                                                                                                      |
| N | Q91642 | DR | dipeptidase activity                                                                                                                                |
| N | Q91642 | DR | serine-type peptidase activity                                                                                                                      |
| N | Q91690 | CC | May act as a transcriptional activator                                                                                                              |
| N | Q91690 | CC | Implicated in the transduction of Shh signal (By similarity).                                                                                       |
| N | Q91690 | DE | Zinc finger protein GLI1;                                                                                                                           |



|   |        |    |                                                                                                                                                                                                                                            |
|---|--------|----|--------------------------------------------------------------------------------------------------------------------------------------------------------------------------------------------------------------------------------------------|
| N | Q91690 | DR | cell differentiation                                                                                                                                                                                                                       |
| N | Q91690 | DR | multicellular organismal development                                                                                                                                                                                                       |
| N | Q91690 | DR | transcription activator activity                                                                                                                                                                                                           |
| N | Q91690 | DR | zinc ion binding                                                                                                                                                                                                                           |
| N | Q918W3 | CC | RNA replication                                                                                                                                                                                                                            |
| N | Q918W3 | CC | The central part of this protein possibly functions as an ATP-binding nuclease (Duckakla)                                                                                                                                                  |
| N | Q918W3 | DE | RNA replication protein;                                                                                                                                                                                                                   |
| N | Q918W3 | DE | RNA-directed RNA polymerase;                                                                                                                                                                                                               |
| N | Q918W3 | DR | RNA processing                                                                                                                                                                                                                             |
| N | Q918W3 | DR | RNA-directed RNA polymerase activity                                                                                                                                                                                                       |
| N | Q918W3 | DR | helicase activity                                                                                                                                                                                                                          |
| N | Q918W3 | DR | mRNA methyltransferase activity                                                                                                                                                                                                            |
| N | Q918W3 | DR | metal ion binding                                                                                                                                                                                                                          |
| N | Q918W3 | DR | oxidation-reduction process                                                                                                                                                                                                                |
| N | Q918W3 | DR | oxidoreductase activity, acting on single donors with incorporation of molecular oxygen, incorporation of two atoms of oxygen                                                                                                              |
| N | Q918W3 | DR | viral genome replication                                                                                                                                                                                                                   |
| N | Q91FF5 | CC | Probable endonuclease (Potential).                                                                                                                                                                                                         |
| N | Q91FF5 | DE | Probable RAD2-like endonuclease 369L;                                                                                                                                                                                                      |
| N | Q91FF5 | DR | endonuclease activity                                                                                                                                                                                                                      |
| N | Q91FF5 | DR | metal ion binding                                                                                                                                                                                                                          |
| N | Q91G63 | DE | Uncharacterized protein 034R;                                                                                                                                                                                                              |
| N | Q91VX5 | CC | May be signaling molecules that resemble neuropeptides                                                                                                                                                                                     |
| N | Q91VX5 | CC | Ligand for alpha-neurexins.                                                                                                                                                                                                                |
| N | Q91VX5 | DE | Neurexophilin-3;                                                                                                                                                                                                                           |
| N | Q91VX5 | DR | receptor binding                                                                                                                                                                                                                           |
| N | Q91Z84 | CC | Associates with IL12B to form the IL-23 interleukin, an heterodimeric cytokine which functions in innate and adaptive immunity                                                                                                             |
| N | Q91Z84 | CC | IL-23 binds to an heterodimeric receptor complex composed of IL12RB1 and IL23R, activates the Jak- Stat signaling cascade, stimulates memory rather than naive T- cells and promotes production of proinflammatory cytokines               |
| N | Q91Z84 | CC | IL-23 induces autoimmune inflammation and thus may be responsible for autoimmune inflammatory diseases and may be important for tumorigenesis (By similarity)                                                                              |
| N | Q91Z84 | CC | IL-23 constitute with IL-17 an acute response to infection in peripheral tissues                                                                                                                                                           |
| N | Q91Z84 | DE | IL-23 subunit alpha;                                                                                                                                                                                                                       |
| N | Q91Z84 | DE | Interleukin-23 subunit alpha;                                                                                                                                                                                                              |
| N | Q91Z84 | DE | Interleukin-23 subunit p19;                                                                                                                                                                                                                |
| N | Q91Z84 | DR | cytokine activity                                                                                                                                                                                                                          |
| N | Q91Z84 | DR | inflammatory response                                                                                                                                                                                                                      |
| N | Q91Z84 | DR | innate immune response                                                                                                                                                                                                                     |
| N | Q91Z84 | DR | response to virus                                                                                                                                                                                                                          |
| N | Q91Z84 | DR | tissue remodeling                                                                                                                                                                                                                          |
| N | Q91ZB7 | CC | Orphan receptor                                                                                                                                                                                                                            |
| N | Q91ZB7 | CC | May regulate nociceptor function and/or development, including the sensation or modulation of pain.                                                                                                                                        |
| N | Q91ZB7 | DE | Evolutionary breakpoint transcript 3 protein;                                                                                                                                                                                              |
| N | Q91ZB7 | DE | Mas-related G-protein coupled receptor member E;                                                                                                                                                                                           |
| N | Q91ZB7 | DR | G-protein coupled receptor activity                                                                                                                                                                                                        |
| N | Q92193 | CC | Actins are highly conserved proteins that are involved in various types of cell motility and are ubiquitously expressed in all eukaryotic cells.                                                                                           |
| N | Q921A3 | CC | Ubiquitin-like protein modifier which can be covalently attached to target protein and subsequently leads to their degradation by the 26S proteasome, in a NUB1L-dependent manner                                                          |
| N | Q921A3 | CC | May be involved in dendritic cell (DC) maturation, the process by which immature dendritic cells differentiate into fully competent antigen-presenting cells that initiate T cell responses                                                |
| N | Q921A3 | CC | May be involved in the formation of aggresomes when proteasome is saturated or impaired                                                                                                                                                    |
| N | Q921A3 | CC | Mediates apoptosis in a caspase-dependent manner, especially in renal epithelium and tubular cells during renal diseases (By similarity).                                                                                                  |
| N | Q921A3 | CC | Mediates mitotic non-disjunction and chromosome instability, in long-term in vitro culture and cancers, by abbreviating mitotic phase and impairing the kinetochore localization of MAD2L1 during the prometaphase stage of the cell cycle |
| N | Q921A3 | CC | Probably functions as a survival factor                                                                                                                                                                                                    |
| N | Q921A3 | CC | Promotes the expression of the proteasome subunit beta type-9 (PSMB9/LMP2)                                                                                                                                                                 |

|   |        |    |                                                                                                                                                                                                                                       |
|---|--------|----|---------------------------------------------------------------------------------------------------------------------------------------------------------------------------------------------------------------------------------------|
| N | Q921A3 | CC | Regulates TNF- alpha-induced and LPS-mediated activation of the central mediator of innate immunity NF-kappa-B by promoting TNF-alpha-mediated proteasomal degradation of ubiquitinated-I-kappa-B-alpha                               |
| N | Q921A3 | CC | Required for TNF-alpha-induced p65 nuclear translocation in renal tubular epithelial cells (RTECs)                                                                                                                                    |
| N | Q921A3 | DE | Diubiquitin;                                                                                                                                                                                                                          |
| N | Q921A3 | DE | Ubiquitin D;                                                                                                                                                                                                                          |
| N | Q921A3 | DE | Ubiquitin-like protein FAT10;                                                                                                                                                                                                         |
| N | Q921A3 | DR | aggresome assembly                                                                                                                                                                                                                    |
| N | Q921A3 | DR | myeloid dendritic cell differentiation                                                                                                                                                                                                |
| N | Q921A3 | DR | negative regulation of mitotic prometaphase                                                                                                                                                                                           |
| N | Q921A3 | DR | positive regulation of I-kappaB kinase/NF-kappaB cascade                                                                                                                                                                              |
| N | Q921A3 | DR | positive regulation of apoptosis                                                                                                                                                                                                      |
| N | Q921A3 | DR | proteasome binding                                                                                                                                                                                                                    |
| N | Q921A3 | DR | protein ubiquitination                                                                                                                                                                                                                |
| N | Q921A3 | DR | response to organic nitrogen                                                                                                                                                                                                          |
| N | Q921A3 | DR | ubiquitin-dependent protein catabolic process                                                                                                                                                                                         |
| N | Q922E4 | DE | CTP:phosphoethanolamine cytidyltransferase;                                                                                                                                                                                           |
| N | Q922E4 | DE | Ethanolamine-phosphate cytidyltransferase;                                                                                                                                                                                            |
| N | Q922E4 | DE | Phosphorylethanolamine transferase;                                                                                                                                                                                                   |
| N | Q922E4 | DR | ethanolamine-phosphate cytidyltransferase activity                                                                                                                                                                                    |
| N | Q922E4 | DR | phospholipid biosynthetic process                                                                                                                                                                                                     |
| N | Q923Y6 | CC | Orphan receptor                                                                                                                                                                                                                       |
| N | Q923Y6 | CC | Although some trace amines have clearly defined roles as neurotransmitters in invertebrates, the extent to which they function as true neurotransmitters in vertebrates has remained speculative                                      |
| N | Q923Y6 | CC | Could be a receptor for trace amines                                                                                                                                                                                                  |
| N | Q923Y6 | CC | Trace amines are biogenic amines present in very low levels in mammalian tissues                                                                                                                                                      |
| N | Q923Y6 | CC | Trace amines are likely to be involved in a variety of physiological functions that have yet to be fully understood.                                                                                                                  |
| N | Q923Y6 | DE | Trace amine receptor 3;                                                                                                                                                                                                               |
| N | Q923Y6 | DE | Trace amine receptor 9;                                                                                                                                                                                                               |
| N | Q923Y6 | DE | Trace amine-associated receptor 9;                                                                                                                                                                                                    |
| N | Q923Y6 | DR | G-protein coupled receptor activity                                                                                                                                                                                                   |
| N | Q924T8 | CC | Receptor for cysteinyl leukotrienes mediating constriction of the microvascular smooth muscle during an inflammatory response                                                                                                         |
| N | Q924T8 | CC | This response is mediated via a G-protein that activates a phosphatidylinositol-calcium second messenger system (By similarity).                                                                                                      |
| N | Q924T8 | DE | Cysteinyl leukotriene receptor 1;                                                                                                                                                                                                     |
| N | Q924T8 | DR | inflammatory response                                                                                                                                                                                                                 |
| N | Q924T8 | DR | leukotriene receptor activity                                                                                                                                                                                                         |
| N | Q924T8 | DR | positive regulation of vasoconstriction                                                                                                                                                                                               |
| N | Q924W9 | CC | May be involved in gene regulation within neural lineage cells potentially by direct DNA binding or by binding to other transcription factors.                                                                                        |
| N | Q924W9 | DE | Cysteine-rich protein TTG-1;                                                                                                                                                                                                          |
| N | Q924W9 | DE | LIM domain only protein 1;                                                                                                                                                                                                            |
| N | Q924W9 | DE | Rhombotin-1;                                                                                                                                                                                                                          |
| N | Q924W9 | DE | T-cell translocation protein 1;                                                                                                                                                                                                       |
| N | Q924W9 | DR | zinc ion binding                                                                                                                                                                                                                      |
| N | Q92664 | CC | Interacts with the internal control region (ICR) of approximately 50 bases within the 5S RNA genes, is required for correct transcription of these genes by RNA polymerase III                                                        |
| N | Q92664 | CC | Also binds the transcribed 5S RNA's                                                                                                                                                                                                   |
| N | Q92664 | CC | May initiate transcription of the 5S ribosomal RNA gene and maintain the stability of transcription of other genes.                                                                                                                   |
| N | Q92664 | DE | Transcription factor IIIA;                                                                                                                                                                                                            |
| N | Q92664 | DR | RNA polymerase III transcription factor activity                                                                                                                                                                                      |
| N | Q92664 | DR | protein binding                                                                                                                                                                                                                       |
| N | Q92664 | DR | rRNA transcription                                                                                                                                                                                                                    |
| N | Q92664 | DR | transcription from RNA polymerase III promoter                                                                                                                                                                                        |
| N | Q92664 | DR | zinc ion binding                                                                                                                                                                                                                      |
| N | Q92C05 | CC | The glycine cleavage system catalyzes the degradation of glycine                                                                                                                                                                      |
| N | Q92C05 | CC | The P protein binds the alpha-amino group of glycine through its pyridoxal phosphate cofactor; CO(2) is released and the remaining methylamine moiety is then transferred to the lipoamide cofactor of the H protein (By similarity). |
| N | Q92C05 | DE | Glycine cleavage system P-protein subunit 1;                                                                                                                                                                                          |

|   |        |    |                                                                                                                                                         |
|---|--------|----|---------------------------------------------------------------------------------------------------------------------------------------------------------|
| N | Q92C05 | DE | Glycine decarboxylase subunit 1;                                                                                                                        |
| N | Q92C05 | DE | Probable glycine dehydrogenase [decarboxylating] subunit 1;                                                                                             |
| N | Q92C05 | DR | glycine dehydrogenase (decarboxylating) activity                                                                                                        |
| N | Q92C05 | DR | oxidation-reduction process                                                                                                                             |
| N | Q92C05 | DR | pyridoxal phosphate binding                                                                                                                             |
| N | Q92C68 | CC | Catalyzes the transfer of an acyl group from acyl- phosphate (acyl-PO(4)) to glycerol-3-phosphate (G3P) to form lysophosphatidic acid (LPA)             |
| N | Q92C68 | CC | This enzyme utilizes acyl-phosphate as fatty acyl donor, but not acyl-CoA or acyl-ACP (By similarity).                                                  |
| N | Q92C68 | DE | Acyl-PO4 G3P acyltransferase;                                                                                                                           |
| N | Q92C68 | DE | Acyl-phosphate--glycerol-3-phosphate acyltransferase;                                                                                                   |
| N | Q92C68 | DE | G3P acyltransferase;                                                                                                                                    |
| N | Q92C68 | DE | Glycerol-3-phosphate acyltransferase;                                                                                                                   |
| N | Q92C68 | DE | LPA synthase;                                                                                                                                           |
| N | Q92C68 | DE | Lysophosphatidic acid synthase;                                                                                                                         |
| N | Q92C68 | DR | phospholipid biosynthetic process                                                                                                                       |
| N | Q92C68 | DR | transferase activity, transferring acyl groups other than amino-acyl groups                                                                             |
| N | Q92D49 | CC | Involved in the biosynthesis of D-alanyl-lipoteichoic acid (LTA)                                                                                        |
| N | Q92D49 | CC | Activated D-alanyl-Dcp donates its D-alanyl substituent to membrane-associated LTA (By similarity).                                                     |
| N | Q92D49 | DE | D-alanine--poly(phosphoribitol) ligase subunit 2;                                                                                                       |
| N | Q92D49 | DE | D-alanyl carrier protein;                                                                                                                               |
| N | Q92D49 | DR | D-alanine-poly(phosphoribitol) ligase activity                                                                                                          |
| N | Q92D49 | DR | acyl carrier activity                                                                                                                                   |
| N | Q92D49 | DR | cellular cell wall organization                                                                                                                         |
| N | Q92D49 | DR | cofactor binding                                                                                                                                        |
| N | Q92D49 | DR | teichoic acid biosynthetic process                                                                                                                      |
| N | Q92F56 | CC | Ligates lysine onto the cytidine present at position 34 of the AUA codon-specific tRNA(Ile) that contains the anticodon CAU, in an ATP-dependent manner |
| N | Q92F56 | CC | Cytidine is converted to lysidine, thus changing the amino acid specificity of the tRNA from methionine to isoleucine (By similarity).                  |
| N | Q92F56 | DE | Bifunctional protein tilS/hprT;                                                                                                                         |
| N | Q92F56 | DE | HGPRTase;                                                                                                                                               |
| N | Q92F56 | DE | Hypoxanthine-guanine phosphoribosyltransferase;                                                                                                         |
| N | Q92F56 | DE | tRNA(Ile)-2-lysyl-cytidine synthase;                                                                                                                    |
| N | Q92F56 | DE | tRNA(Ile)-lysidine synthase;                                                                                                                            |
| N | Q92F56 | DE | tRNA(Ile)-lysidine synthetase;                                                                                                                          |
| N | Q92F56 | DR | guanine phosphoribosyltransferase activity                                                                                                              |
| N | Q92F56 | DR | hypoxanthine phosphoribosyltransferase activity                                                                                                         |
| N | Q92F56 | DR | ligase activity, forming carbon-nitrogen bonds                                                                                                          |
| N | Q92F56 | DR | metal ion binding                                                                                                                                       |
| N | Q92F56 | DR | purine ribonucleoside salvage                                                                                                                           |
| N | Q92F56 | DR | tRNA processing                                                                                                                                         |
| N | Q92G41 | CC | Ferredoxins are iron-sulfur proteins that transfer electrons in a wide variety of metabolic reactions (By similarity).                                  |
| N | Q92G41 | DR | 3 iron, 4 sulfur cluster binding                                                                                                                        |
| N | Q92G41 | DR | 4 iron, 4 sulfur cluster binding                                                                                                                        |
| N | Q92G41 | DR | electron carrier activity                                                                                                                               |
| N | Q92G41 | DR | electron transport chain                                                                                                                                |
| N | Q92G41 | DR | metal ion binding                                                                                                                                       |
| N | Q92G41 | DR | oxidoreductase activity                                                                                                                                 |
| N | Q92HI5 | DE | Uncharacterized protein RC0786;                                                                                                                         |
| N | Q92JF2 | DE | Uncharacterized protein RC0115;                                                                                                                         |
| N | Q92JL6 | DE | Uncharacterized protein RC0051;                                                                                                                         |
| N | Q92NM4 | CC | Cell wall formation (By similarity).                                                                                                                    |
| N | Q92NM4 | DE | D-Ala-D-Ala ligase;                                                                                                                                     |
| N | Q92NM4 | DE | D-alanine--D-alanine ligase;                                                                                                                            |
| N | Q92NM4 | DE | D-alanylalanine synthetase;                                                                                                                             |
| N | Q92NM4 | DR | D-alanine-D-alanine ligase activity                                                                                                                     |
| N | Q92NM4 | DR | cellular cell wall organization                                                                                                                         |
| N | Q92NM4 | DR | metal ion binding                                                                                                                                       |
| N | Q92NM4 | DR | peptidoglycan biosynthetic process                                                                                                                      |
| N | Q92NM4 | DR | regulation of cell shape                                                                                                                                |

|   |        |    |                                                                                                                                                                                |
|---|--------|----|--------------------------------------------------------------------------------------------------------------------------------------------------------------------------------|
| N | Q92QK7 | CC | Furnishes a means for formation of correctly charged Gln-tRNA(Gln) through the transamidation of misacylated Glu- tRNA(Gln) in organisms which lack glutaminyI-tRNA synthetase |
| N | Q92QK7 | CC | The reaction takes place in the presence of glutamine and ATP through an activated gamma-phospho-Glu-tRNA(Gln) (By similarity).                                                |
| N | Q92QK7 | DE | Glu-ADT subunit A;                                                                                                                                                             |
| N | Q92QK7 | DE | Glutamyl-tRNA(Gln) amidotransferase subunit A;                                                                                                                                 |
| N | Q92QK7 | DR | carbon-nitrogen ligase activity, with glutamine as amido-N-donor                                                                                                               |
| N | Q931D7 | CC | Necessary for formate dehydrogenase activity (By similarity).                                                                                                                  |
| N | Q931D7 | DE | Protein FdhE homolog;                                                                                                                                                          |
| N | Q935S7 | CC | Plays a central role in chromosome condensation, segregation and cell cycle progression                                                                                        |
| N | Q935S7 | CC | Functions as a homodimer, which is essential for chromosome partition                                                                                                          |
| N | Q935S7 | CC | Involved in negative DNA supercoiling in vivo, and by this means organize and compact chromosomes                                                                              |
| N | Q935S7 | CC | May achieve or facilitate chromosome segregation by condensation DNA from both sides of a centrally located replisome during cell division (By similarity).                    |
| N | Q935S7 | DE | Chromosome partition protein mukB;                                                                                                                                             |
| N | Q935S7 | DE | Structural maintenance of chromosome-related protein;                                                                                                                          |
| N | Q935S7 | DR | cell division                                                                                                                                                                  |
| N | Q935S7 | DR | chromosome condensation                                                                                                                                                        |
| N | Q935S7 | DR | chromosome segregation                                                                                                                                                         |
| N | Q93WU7 | CC | Transcription factor                                                                                                                                                           |
| N | Q93WU7 | CC | Interacts specifically with the W box (5'-(T)TGAC[CT]-3'), a frequently occurring elicitor- responsive cis-acting element (By similarity).                                     |
| N | Q93WU7 | DE | Probable WRKY transcription factor 58;                                                                                                                                         |
| N | Q93WU7 | DE | WRKY DNA-binding protein 58;                                                                                                                                                   |
| N | Q93WU7 | DR | regulation of defense response                                                                                                                                                 |
| N | Q93WU7 | DR | sequence-specific DNA binding                                                                                                                                                  |
| N | Q93WU7 | DR | sequence-specific DNA binding transcription factor activity                                                                                                                    |
| N | Q941Z0 | CC | The enzyme apparently serves as a quinone reductase in connection with conjugation reactions of hydroquinones involved in detoxification pathways (By similarity)              |
| N | Q941Z0 | DE | Probable NADPH:quinone oxidoreductase 1;                                                                                                                                       |
| N | Q941Z0 | DR | NAD(P)H dehydrogenase (quinone) activity                                                                                                                                       |
| N | Q941Z0 | DR | oxidation-reduction process                                                                                                                                                    |
| N | Q944W2 | CC | Responsible for the transport of sucrose into the cell, with the concomitant uptake of protons (symport system)                                                                |
| N | Q944W2 | CC | May also transport other glucosides (By similarity).                                                                                                                           |
| N | Q944W2 | DE | Sucrose permease 3;                                                                                                                                                            |
| N | Q944W2 | DE | Sucrose transport protein SUT3;                                                                                                                                                |
| N | Q944W2 | DE | Sucrose transporter 3;                                                                                                                                                         |
| N | Q944W2 | DE | Sucrose-proton symporter 3;                                                                                                                                                    |
| N | Q944W2 | DR | sucrose transmembrane transporter activity                                                                                                                                     |
| N | Q944W2 | DR | symporter activity                                                                                                                                                             |
| N | Q94587 | CC | Involved in calcium binding and microtubule stabilization (By similarity).                                                                                                     |
| N | Q94587 | DE | Translationally-controlled tumor protein homolog;                                                                                                                              |
| N | Q94AZ4 | CC | Potential calcium sensor (By similarity).                                                                                                                                      |
| N | Q94AZ4 | DE | Calmodulin-like protein 13;                                                                                                                                                    |
| N | Q94AZ4 | DE | Probable calcium-binding protein CML13;                                                                                                                                        |
| N | Q94AZ4 | DR | calcium ion binding                                                                                                                                                            |
| N | Q94B55 | CC | No E3 ubiquitin-protein ligase activity observed when associated with the E2 enzyme UBC8 in vitro.                                                                             |
| N | Q94B55 | DE | Ankyrin repeat domain and RING finger-containing protein XBAT31;                                                                                                               |
| N | Q94B55 | DE | Protein XB3 homolog 1;                                                                                                                                                         |
| N | Q94B55 | DE | Putative E3 ubiquitin-protein ligase XBAT31;                                                                                                                                   |
| N | Q94B55 | DR | ligase activity                                                                                                                                                                |
| N | Q94B55 | DR | protein binding                                                                                                                                                                |
| N | Q94B55 | DR | zinc ion binding                                                                                                                                                               |
| N | Q94IR2 | CC | Cleaves a variety of carotenoids at the 9-10 and 9'-10' double bonds                                                                                                           |
| N | Q94IR2 | CC | Probably not involved in abscisic acid biosynthesis.                                                                                                                           |
| N | Q94IR2 | DE | Carotenoid 9,10(9',10')-cleavage dioxygenase 1;                                                                                                                                |
| N | Q94IR2 | DE | Neoxanthin cleavage enzyme NC2;                                                                                                                                                |
| N | Q94IR2 | DR | metal ion binding                                                                                                                                                              |
| N | Q94IR2 | DR | oxidation-reduction process                                                                                                                                                    |
| N | Q94IR2 | DR | oxidoreductase activity, acting on single donors with incorporation of molecular oxygen, incorporation of two atoms of oxygen                                                  |

|   |        |    |                                                                                                                                                                                              |
|---|--------|----|----------------------------------------------------------------------------------------------------------------------------------------------------------------------------------------------|
| N | Q94JL3 | DE | Basic helix-loop-helix protein 112;                                                                                                                                                          |
| N | Q94JL3 | DE | Transcription factor EN 64;                                                                                                                                                                  |
| N | Q94JL3 | DE | Transcription factor bHLH112;                                                                                                                                                                |
| N | Q94JL3 | DE | bHLH transcription factor bHLH112;                                                                                                                                                           |
| N | Q94JL3 | DR | transcription regulator activity                                                                                                                                                             |
| N | Q95136 | CC | This is one of the five types (D1 to D5) of receptors for dopamine                                                                                                                           |
| N | Q95136 | CC | The activity of this receptor is mediated by G proteins which activate adenylyl cyclase                                                                                                      |
| N | Q95136 | DE | D(1A) dopamine receptor;                                                                                                                                                                     |
| N | Q95136 | DE | Dopamine D1 receptor;                                                                                                                                                                        |
| N | Q95136 | DR | dopamine receptor activity                                                                                                                                                                   |
| N | Q95196 | CC | Participates in the formation of a gel matrix (sperm coagulum) entrapping the accessory gland secretions and ejaculated spermatozoa.                                                         |
| N | Q95196 | DE | Semenogelin II;                                                                                                                                                                              |
| N | Q95196 | DE | Semenogelin-2;                                                                                                                                                                               |
| N | Q95196 | DR | sexual reproduction                                                                                                                                                                          |
| N | Q95196 | DR | structural molecule activity                                                                                                                                                                 |
| N | Q95GN9 | CC | No specific function has so far been attributed to this initiation factor; however, it seems to stimulate more or less all the activities of the other two initiation factors, IF 2 and IF 3 |
| N | Q95GN9 | DE | Translation initiation factor IF-1, chloroplastic;                                                                                                                                           |
| N | Q95GN9 | DR | translation initiation factor activity                                                                                                                                                       |
| N | Q95LM0 | CC | Probable redox-inactive chaperone involved in spermatogenesis (By similarity).                                                                                                               |
| N | Q95LM0 | DE | Protein disulfide-isomerase-like protein of the testis;                                                                                                                                      |
| N | Q95LM0 | DR | cell differentiation                                                                                                                                                                         |
| N | Q95LM0 | DR | cell redox homeostasis                                                                                                                                                                       |
| N | Q95LM0 | DR | isomerase activity                                                                                                                                                                           |
| N | Q95LM0 | DR | multicellular organismal development                                                                                                                                                         |
| N | Q95LM0 | DR | spermatogenesis                                                                                                                                                                              |
| N | Q95M53 | CC | Cooperates with LY96 to mediate the innate immune response to bacterial lipoproteins and other microbial cell wall components                                                                |
| N | Q95M53 | CC | Acts via MYD88 and TRAF6, leading to NF-kappa-B activation, cytokine secretion and the inflammatory response                                                                                 |
| N | Q95M53 | CC | Cooperates with TLR1 to mediate the innate immune response to bacterial lipoproteins or lipopeptides                                                                                         |
| N | Q95M53 | CC | May also promote apoptosis in response to lipoproteins (By similarity).                                                                                                                      |
| N | Q95M53 | DE | CD282;                                                                                                                                                                                       |
| N | Q95M53 | DE | Toll-like receptor 2;                                                                                                                                                                        |
| N | Q95M53 | DR | inflammatory response                                                                                                                                                                        |
| N | Q95M53 | DR | innate immune response                                                                                                                                                                       |
| N | Q95M53 | DR | transmembrane receptor activity                                                                                                                                                              |
| N | Q95SS8 | DE | Transmembrane protein 70 homolog, mitochondrial;                                                                                                                                             |
| N | Q95SS8 | DR | mitochondrial proton-transporting ATP synthase complex assembly                                                                                                                              |
| N | Q962X7 | CC | Necessary for protein translocation in the endoplasmic reticulum (By similarity).                                                                                                            |
| N | Q962X7 | DE | Protein transport protein Sec61 subunit gamma;                                                                                                                                               |
| N | Q962X7 | DR | P-P-bond-hydrolysis-driven protein transmembrane transporter activity                                                                                                                        |
| N | Q962X7 | DR | protein targeting to ER                                                                                                                                                                      |
| N | Q962X9 | DE | Protein BUD31 homolog;                                                                                                                                                                       |
| N | Q962X9 | DE | Protein G10 homolog;                                                                                                                                                                         |
| N | Q96680 | DE | Maturation protein;                                                                                                                                                                          |
| N | Q96680 | DE | Protein IVA2;                                                                                                                                                                                |
| N | Q96680 | DR | viral transcription                                                                                                                                                                          |
| N | Q966L8 | CC | Transcription factor essential for the identity of ASE chemosensory neurons                                                                                                                  |
| N | Q966L8 | CC | Acts by activating expression of genes that are specific for ASE chemosensory neurons, such as seven- transmembrane receptors or guanylate cyclase                                           |
| N | Q966L8 | CC | Also required to control the left/right asymmetry in ASE chemosensory neurons by regulating expression of genes such as cog-1 and ceh-36.                                                    |
| N | Q966L8 | DE | Abnormal chemotaxis protein 1;                                                                                                                                                               |
| N | Q966L8 | DE | Transcription factor che-1;                                                                                                                                                                  |
| N | Q966L8 | DR | zinc ion binding                                                                                                                                                                             |
| N | Q96CK0 | CC | Transcriptional repressor                                                                                                                                                                    |
| N | Q96CK0 | CC | May repress NR5A1, PPARG, NR1H3, NR4A2, ESR1 and NR3C1                                                                                                                                       |
| N | Q96CK0 | DE | transcriptional activity.                                                                                                                                                                    |
| N | Q96CK0 | DE | 67 kDa zinc finger protein;                                                                                                                                                                  |
| N | Q96CK0 | DE | Zinc finger protein 653;                                                                                                                                                                     |
| N | Q96CK0 | DE | Zinc finger protein Zip67;                                                                                                                                                                   |
| N | Q96CK0 | DR | zinc ion binding                                                                                                                                                                             |

|   |        |    |                                                                                                                                                                        |
|---|--------|----|------------------------------------------------------------------------------------------------------------------------------------------------------------------------|
| N | Q96DE9 | DE | Protein CXorf40B;                                                                                                                                                      |
| N | Q96I45 | DE | Transmembrane protein 141;                                                                                                                                             |
| N | Q96N68 | DE | Putative uncharacterized protein C18orf15;                                                                                                                             |
| N | Q96SK3 | CC | May be involved in transcriptional regulation.                                                                                                                         |
| N | Q96SK3 | DE | Zinc finger protein 607;                                                                                                                                               |
| N | Q96SK3 | DR | regulation of transcription, DNA-dependent                                                                                                                             |
| N | Q96SK3 | DR | zinc ion binding                                                                                                                                                       |
| N | Q96WN6 | CC | Positive regulation of the major cellulase and xylanase genes (cbh1, cbh2, eg12 and xmn2).                                                                             |
| N | Q96WN6 | CC | Binds to the 5'-GGCTAATAA-3' site present in the cbh1 promoter.                                                                                                        |
| N | Q96WN6 | DE | Transcription factor ACEII;                                                                                                                                            |
| N | Q96WN6 | DR | positive regulation of transcription, DNA-dependent                                                                                                                    |
| N | Q96WN6 | DR | sequence-specific DNA binding transcription factor activity                                                                                                            |
| N | Q96WN6 | DR | transcription activator activity                                                                                                                                       |
| N | Q96WN6 | DR | zinc ion binding                                                                                                                                                       |
| N | Q971E0 | DE | Protein ST1413;                                                                                                                                                        |
| N | Q971E0 | DR | Mo-molybdopterin cofactor biosynthetic process                                                                                                                         |
| N | Q971S9 | CC | Binds to the signal sequence of presecretory protein when they emerge from the ribosomes (By similarity).                                                              |
| N | Q971S9 | DE | Signal recognition 54 kDa protein;                                                                                                                                     |
| N | Q971S9 | DR | 7S RNA binding                                                                                                                                                         |
| N | Q971S9 | DR | SRP-dependent cotranslational protein targeting to membrane                                                                                                            |
| N | Q971S9 | DR | nucleoside-triphosphatase activity                                                                                                                                     |
| N | Q971Z4 | DE | Acylphosphatase;                                                                                                                                                       |
| N | Q971Z4 | DE | Acylphosphate phosphohydrolase;                                                                                                                                        |
| N | Q971Z4 | DR | acylphosphatase activity                                                                                                                                               |
| N | Q976K0 | CC | Involved in both the arginine and lysine biosynthetic pathways (By similarity).                                                                                        |
| N | Q976K0 | DE | Acetylornithine/acetyl-lysine aminotransferase;                                                                                                                        |
| N | Q976K0 | DR | N2-acetyl-L-ornithine:2-oxoglutarate 5-aminotransferase activity                                                                                                       |
| N | Q976K0 | DR | arginine biosynthetic process                                                                                                                                          |
| N | Q976K0 | DR | lysine biosynthetic process                                                                                                                                            |
| N | Q976K0 | DR | pyridoxal phosphate binding                                                                                                                                            |
| N | Q97A09 | CC | Endonuclease IV plays a role in DNA repair                                                                                                                             |
| N | Q97A09 | CC | It cleaves phosphodiester bonds at apurinic or apyrimidinic sites (AP sites) to produce new 5'-ends that are base-free deoxyribose 5-phosphate residues                |
| N | Q97A09 | CC | It preferentially attacks modified AP sites created by bleomycin and neocarzinostatin (By similarity).                                                                 |
| N | Q97A09 | DE | Endodeoxyribonuclease IV;                                                                                                                                              |
| N | Q97A09 | DE | Endonuclease IV;                                                                                                                                                       |
| N | Q97A09 | DE | Probable endonuclease 4;                                                                                                                                               |
| N | Q97A09 | DR | deoxyribonuclease IV (phage-T4-induced) activity                                                                                                                       |
| N | Q97A09 | DR | zinc ion binding                                                                                                                                                       |
| N | Q97KI3 | CC | Catalyzes the condensation of ATP and 5-phosphoribose 1- diphosphate to form N'-(5'-phosphoribosyl)-ATP (PR-ATP)                                                       |
| N | Q97KI3 | CC | has a crucial role in the pathway because the rate of histidine biosynthesis seems to be controlled primarily by regulation of hisG enzymatic activity (By similarity) |
| N | Q97KI3 | DE | ATP phosphoribosyltransferase;                                                                                                                                         |
| N | Q97KI3 | DE | ATP-PRTase;                                                                                                                                                            |
| N | Q97KI3 | DR | ATP phosphoribosyltransferase activity                                                                                                                                 |
| N | Q97KI3 | DR | histidine biosynthetic process                                                                                                                                         |
| N | Q97KL8 | CC | Catalyzes a trans-dehydration via an enolate intermediate (By similarity).                                                                                             |
| N | Q97KL8 | DE | 3-dehydroquinase;                                                                                                                                                      |
| N | Q97KL8 | DE | 3-dehydroquinone dehydratase;                                                                                                                                          |
| N | Q97KL8 | DE | Type II DHQase;                                                                                                                                                        |
| N | Q97KL8 | DR | 3-dehydroquinone dehydratase activity                                                                                                                                  |
| N | Q97KL8 | DR | aromatic amino acid family biosynthetic process                                                                                                                        |
| N | Q97KZ2 | DE | UPF0272 protein CA_C0774;                                                                                                                                              |
| N | Q97LP1 | CC | May be required for sporulation (By similarity).                                                                                                                       |
| N | Q97LP1 | DE | Putative sporulation transcription regulator whiA;                                                                                                                     |
| N | Q97LP1 | DR | endonuclease activity                                                                                                                                                  |
| N | Q97R22 | DE | Thymidine kinase;                                                                                                                                                      |
| N | Q97R22 | DR | DNA replication                                                                                                                                                        |
| N | Q97R22 | DR | metal ion binding                                                                                                                                                      |
| N | Q97R22 | DR | thymidine kinase activity                                                                                                                                              |

|   |        |    |                                                                                                                                                                                                                                                                                                                                                                                                  |
|---|--------|----|--------------------------------------------------------------------------------------------------------------------------------------------------------------------------------------------------------------------------------------------------------------------------------------------------------------------------------------------------------------------------------------------------|
| N | Q97RS5 | CC | Condenses 4-methyl-5-(beta-hydroxyethyl)thiazole monophosphate (THZ-P) and 2-methyl-4-amino-5-hydroxymethyl pyrimidine pyrophosphate (HMP-PP) to form thiamine monophosphate (TMP) (By similarity).                                                                                                                                                                                              |
| N | Q97RS5 | DE | TMP pyrophosphorylase 1;                                                                                                                                                                                                                                                                                                                                                                         |
| N | Q97RS5 | DE | TMP-PPase 1;                                                                                                                                                                                                                                                                                                                                                                                     |
| N | Q97RS5 | DE | Thiamine-phosphate pyrophosphorylase 1;                                                                                                                                                                                                                                                                                                                                                          |
| N | Q97RS5 | DE | Thiamine-phosphate synthase 1;                                                                                                                                                                                                                                                                                                                                                                   |
| N | Q97RS5 | DR | metal ion binding                                                                                                                                                                                                                                                                                                                                                                                |
| N | Q97RS5 | DR | thiamine biosynthetic process                                                                                                                                                                                                                                                                                                                                                                    |
| N | Q97RS5 | DR | thiamine-phosphate diphosphorylase activity                                                                                                                                                                                                                                                                                                                                                      |
| N | Q97SU1 | CC | Catalyzes the reversible transfer of the terminal phosphate group between ATP and AMP                                                                                                                                                                                                                                                                                                            |
| N | Q97SU1 | CC | This small ubiquitous enzyme involved in the energy metabolism and nucleotide synthesis, is essential for maintenance and cell growth (By similarity).                                                                                                                                                                                                                                           |
| N | Q97SU1 | DE | ATP-AMP transphosphorylase;                                                                                                                                                                                                                                                                                                                                                                      |
| N | Q97SU1 | DE | Adenylate kinase;                                                                                                                                                                                                                                                                                                                                                                                |
| N | Q97SU1 | DR | adenylate kinase activity                                                                                                                                                                                                                                                                                                                                                                        |
| N | Q97TC5 | CC | Ligates lysine onto the cytidine present at position 34 of the AUA codon-specific tRNA(Ile) that contains the anticodon CAU, in an ATP-dependent manner                                                                                                                                                                                                                                          |
| N | Q97TC5 | CC | Cytidine is converted to lysidine, thus changing the amino acid specificity of the tRNA from methionine to isoleucine (By similarity).                                                                                                                                                                                                                                                           |
| N | Q97TC5 | DE | tRNA(Ile)-2-lysyl-cytidine synthase;                                                                                                                                                                                                                                                                                                                                                             |
| N | Q97TC5 | DE | tRNA(Ile)-lysidine synthase;                                                                                                                                                                                                                                                                                                                                                                     |
| N | Q97TC5 | DE | tRNA(Ile)-lysidine synthetase;                                                                                                                                                                                                                                                                                                                                                                   |
| N | Q97TC5 | DR | ligase activity, forming carbon-nitrogen bonds                                                                                                                                                                                                                                                                                                                                                   |
| N | Q97TC5 | DR | tRNA processing                                                                                                                                                                                                                                                                                                                                                                                  |
| N | Q97WG9 | CC | Involved in DNA double-strand break repair (DSBR)                                                                                                                                                                                                                                                                                                                                                |
| N | Q97WG9 | CC | The rad50/mre11 complex possesses single-strand endonuclease activity and ATP-dependent double-strand-specific 3'-5' exonuclease activity (By similarity).                                                                                                                                                                                                                                       |
| N | Q97WG9 | DE | DNA double-strand break repair protein mre11;                                                                                                                                                                                                                                                                                                                                                    |
| N | Q97WG9 | DR | endonuclease activity                                                                                                                                                                                                                                                                                                                                                                            |
| N | Q97WG9 | DR | exonuclease activity                                                                                                                                                                                                                                                                                                                                                                             |
| N | Q97ZM1 | DE | Ornithine carbamoyltransferase;                                                                                                                                                                                                                                                                                                                                                                  |
| N | Q97ZM1 | DR | amino acid binding                                                                                                                                                                                                                                                                                                                                                                               |
| N | Q97ZM1 | DR | arginine biosynthetic process                                                                                                                                                                                                                                                                                                                                                                    |
| N | Q97ZM1 | DR | ornithine carbamoyltransferase activity                                                                                                                                                                                                                                                                                                                                                          |
| N | Q98300 | CC | Essential for virus replication (By similarity).                                                                                                                                                                                                                                                                                                                                                 |
| N | Q98300 | DE | Protein MC134;                                                                                                                                                                                                                                                                                                                                                                                   |
| N | Q98300 | DE | Viral replication protein A28-like;                                                                                                                                                                                                                                                                                                                                                              |
| N | Q98300 | DR | viral reproduction                                                                                                                                                                                                                                                                                                                                                                               |
| N | Q986Q8 | CC | Specifically catalyzes the cleavage of the D-lactyl ether substituent of MurNAc 6-phosphate, producing GlcNAc 6-phosphate and D-lactate together with ammonia, is also required for the utilization of anhydrotetracycline-acetylmuramic acid (anhMurNAc) either imported from the medium or derived from its own cell wall murein, and thus plays a role in cell wall recycling (By similarity) |
| N | Q986Q8 | CC |                                                                                                                                                                                                                                                                                                                                                                                                  |
| N | Q986Q8 | DE | MurNAc-6-P etherase;                                                                                                                                                                                                                                                                                                                                                                             |
| N | Q986Q8 | DE | N-acetylmuramic acid 6-phosphate etherase;                                                                                                                                                                                                                                                                                                                                                       |
| N | Q986Q8 | DE | N-acetylmuramic acid 6-phosphate hydrolase;                                                                                                                                                                                                                                                                                                                                                      |
| N | Q986Q8 | DE | N-acetylmuramic acid 6-phosphate lyase;                                                                                                                                                                                                                                                                                                                                                          |
| N | Q986Q8 | DR | amino sugar catabolic process                                                                                                                                                                                                                                                                                                                                                                    |
| N | Q986Q8 | DR | hydro-lyase activity                                                                                                                                                                                                                                                                                                                                                                             |
| N | Q986Q8 | DR | sugar binding                                                                                                                                                                                                                                                                                                                                                                                    |
| N | Q98965 | CC | Shows cytolytic activity (By similarity).                                                                                                                                                                                                                                                                                                                                                        |
| N | Q98965 | DE | Cardiotoxin-6;                                                                                                                                                                                                                                                                                                                                                                                   |
| N | Q98FE3 | DE | 50S ribosomal protein L36;                                                                                                                                                                                                                                                                                                                                                                       |
| N | Q98FE3 | DR | structural constituent of ribosome                                                                                                                                                                                                                                                                                                                                                               |
| N | Q98G94 | CC | Probable protein methyltransferase                                                                                                                                                                                                                                                                                                                                                               |
| N | Q98G94 | CC | May methylate a Gln residue in target proteins (By similarity).                                                                                                                                                                                                                                                                                                                                  |
| N | Q98G94 | DE | Protein methyltransferase hemK homolog;                                                                                                                                                                                                                                                                                                                                                          |
| N | Q98G94 | DR | nucleic acid binding                                                                                                                                                                                                                                                                                                                                                                             |
| N | Q98G94 | DR | protein methyltransferase activity                                                                                                                                                                                                                                                                                                                                                               |
| N | Q98KA8 | CC | Catalyzes the addition of meso-diaminopimelic acid to the nucleotide precursor UDP-N-acetylmuramoyl-L-alanyl-D-glutamate (UMAG) in the biosynthesis of bacterial cell-wall peptidoglycan (By similarity).                                                                                                                                                                                        |
| N | Q98KA8 | DE | Meso-A2pm-adding enzyme;                                                                                                                                                                                                                                                                                                                                                                         |

|   |        |    |                                                                                                                                                                                                                                  |
|---|--------|----|----------------------------------------------------------------------------------------------------------------------------------------------------------------------------------------------------------------------------------|
| N | Q98KA8 | DE | Meso-diaminopimelate-adding enzyme;                                                                                                                                                                                              |
| N | Q98KA8 | DE | UDP-MurNAc-L-Ala-D-Glu:meso-diaminopimelate ligase;                                                                                                                                                                              |
| N | Q98KA8 | DE | UDP-MurNAc-tripeptide synthetase;                                                                                                                                                                                                |
| N | Q98KA8 | DE | UDP-N-acetylmuramoyl-L-alanyl-D-glutamate--2,6-diaminopimelate ligase;                                                                                                                                                           |
| N | Q98KA8 | DE | UDP-N-acetylmuramoyl-tripeptide synthetase;                                                                                                                                                                                      |
| N | Q98KA8 | DR | UDP-N-acetylmuramoylalanyl-D-glutamate-2,6-diaminopimelate ligase activity                                                                                                                                                       |
| N | Q98KA8 | DR | cell division                                                                                                                                                                                                                    |
| N | Q98KA8 | DR | cellular cell wall organization                                                                                                                                                                                                  |
| N | Q98KA8 | DR | peptidoglycan biosynthetic process                                                                                                                                                                                               |
| N | Q98KA8 | DR | regulation of cell shape                                                                                                                                                                                                         |
| N | Q98N46 | CC | One of two assembly initiator proteins, it binds directly to the 5'-end of the 23S rRNA, where it nucleates assembly of the 50S subunit (By similarity).                                                                         |
| N | Q98N46 | DE | 50S ribosomal protein L24;                                                                                                                                                                                                       |
| N | Q98N46 | DR | structural constituent of ribosome                                                                                                                                                                                               |
| N | Q98PA0 | DE | UPF0337 protein msl9551;<br>binds 16S rRNA, required for the assembly of 50S particles and may also be                                                                                                                           |
| N | Q98PZ5 | CC | responsible for determining the conformation of the 16S rRNA at the A site (By similarity)                                                                                                                                       |
| N | Q98PZ5 | DE | 30S ribosomal protein S14 type Z;                                                                                                                                                                                                |
| N | Q98PZ5 | DR | metal ion binding                                                                                                                                                                                                                |
| N | Q98PZ5 | DR | structural constituent of ribosome                                                                                                                                                                                               |
| N | Q98Q13 | CC | Could be a nuclease that resolves Holliday junction intermediates in genetic recombination.                                                                                                                                      |
| N | Q98Q13 | DE | Putative Holliday junction resolvase;                                                                                                                                                                                            |
| N | Q98Q13 | DR | DNA recombination                                                                                                                                                                                                                |
| N | Q98Q13 | DR | nuclease activity                                                                                                                                                                                                                |
| N | Q98Q13 | DR | nucleic acid binding                                                                                                                                                                                                             |
| N | Q98QQ2 | DE | UPF0348 protein MYPU_3090;                                                                                                                                                                                                       |
| N | Q98R70 | CC | Binds the 23S rRNA (By similarity).                                                                                                                                                                                              |
| N | Q98R70 | DE | 50S ribosomal protein L31;                                                                                                                                                                                                       |
| N | Q98R70 | DR | structural constituent of ribosome                                                                                                                                                                                               |
| N | Q98SV0 | CC | Might be responsible for some of the extracellular antioxidant defense properties of selenium.                                                                                                                                   |
| N | Q98SV0 | DE | Selenoprotein Pb;                                                                                                                                                                                                                |
| N | Q98SV0 | DR | response to oxidative stress                                                                                                                                                                                                     |
| N | Q98SV0 | DR | selenium binding                                                                                                                                                                                                                 |
| N | Q99795 | CC | May play a role in cell-cell recognition and signaling.                                                                                                                                                                          |
| N | Q99795 | DE | Cell surface A33 antigen;                                                                                                                                                                                                        |
| N | Q99795 | DE | Glycoprotein A33;                                                                                                                                                                                                                |
| N | Q99795 | DR | receptor activity                                                                                                                                                                                                                |
| N | Q99JT2 | CC | Mediator of cell growth                                                                                                                                                                                                          |
| N | Q99JT2 | CC | Modulates apoptosis (By similarity).                                                                                                                                                                                             |
| N | Q99JT2 | DE | Mammalian STE20-like protein kinase 4;                                                                                                                                                                                           |
| N | Q99JT2 | DE | STE20-like kinase MST4;                                                                                                                                                                                                          |
| N | Q99JT2 | DE | Serine/threonine-protein kinase MST4;                                                                                                                                                                                            |
| N | Q99JT2 | DR | magnesium ion binding                                                                                                                                                                                                            |
| N | Q99JT2 | DR | protein phosphorylation                                                                                                                                                                                                          |
| N | Q99JT2 | DR | protein serine/threonine kinase activity                                                                                                                                                                                         |
| N | Q99JT2 | DR | regulation of apoptosis                                                                                                                                                                                                          |
| N | Q99KJ8 | CC | Modulates cytoplasmic dynein binding to an organelle, and plays a role in prometaphase chromosome alignment and spindle organization during mitosis                                                                              |
| N | Q99KJ8 | CC | Involved in anchoring microtubules to centrosomes                                                                                                                                                                                |
| N | Q99KJ8 | CC | May play a role in synapse formation during brain development.                                                                                                                                                                   |
| N | Q99KJ8 | DE | 50 kDa dynein-associated polypeptide;                                                                                                                                                                                            |
| N | Q99KJ8 | DE | Dynactin complex 50 kDa subunit;                                                                                                                                                                                                 |
| N | Q99KJ8 | DE | Dynactin subunit 2;                                                                                                                                                                                                              |
| N | Q99KJ8 | DE | Growth cone membrane protein 23-48K;                                                                                                                                                                                             |
| N | Q99KJ8 | DE | p50 dynamitin;                                                                                                                                                                                                                   |
| N | Q99KJ8 | DR | motor activity                                                                                                                                                                                                                   |
| N | Q99KJ8 | DR | protein binding                                                                                                                                                                                                                  |
| N | Q99M64 | CC | Together with PI4K2B and the type III PI4Ks (PIK4CA and PIK4CB) it contributes to the overall PI4-kinase activity of the cell                                                                                                    |
| N | Q99M64 | CC | Contributes to the production of InsP3 in stimulated cells.                                                                                                                                                                      |
| N | Q99M64 | CC | The phosphorylation of phosphatidylinositol (PI) to PI4P is the first committed step in the generation of phosphatidylinositol 4,5-bisphosphate (PIP2), a precursor of the second messenger inositol 1,4,5-trisphosphate (InsP3) |



|   |        |    |                                                                                                                                                                                                                                                           |
|---|--------|----|-----------------------------------------------------------------------------------------------------------------------------------------------------------------------------------------------------------------------------------------------------------|
| N | Q99M64 | DE | 55 kDa type II phosphatidylinositol 4-kinase;                                                                                                                                                                                                             |
| N | Q99M64 | DE | Phosphatidylinositol 4-kinase type 2-alpha;                                                                                                                                                                                                               |
| N | Q99M64 | DE | Phosphatidylinositol 4-kinase type II-alpha;                                                                                                                                                                                                              |
| N | Q99M64 | DR | 1-phosphatidylinositol 4-kinase activity                                                                                                                                                                                                                  |
| N | Q99M64 | DR | basophil degranulation                                                                                                                                                                                                                                    |
| N | Q99M64 | DR | protein complex binding                                                                                                                                                                                                                                   |
| N | Q99MD9 | CC | Required for DNA replication, normal cell cycle progression and cell proliferation                                                                                                                                                                        |
| N | Q99MD9 | CC | Forms a cytoplasmic complex with HSP90 and linker H1 histones and stimulates HSP90 ATPase activity                                                                                                                                                        |
| N | Q99MD9 | CC | NASP and H1 histone are subsequently released from the complex and translocate to the nucleus where the histone is released for binding to DNA.                                                                                                           |
| N | Q99MD9 | DE | Nuclear autoantigenic sperm protein;                                                                                                                                                                                                                      |
| N | Q99MD9 | DR | DNA replication                                                                                                                                                                                                                                           |
| N | Q99MD9 | DR | Hsp90 protein binding                                                                                                                                                                                                                                     |
| N | Q99MD9 | DR | blastocyst development                                                                                                                                                                                                                                    |
| N | Q99MD9 | DR | cell proliferation                                                                                                                                                                                                                                        |
| N | Q99MD9 | DR | histone binding                                                                                                                                                                                                                                           |
| N | Q99MD9 | DR | histone exchange                                                                                                                                                                                                                                          |
| N | Q99MD9 | DR | protein transport                                                                                                                                                                                                                                         |
| N | Q99PP9 | CC | May play a role in the regulation of keratinocyte differentiation.                                                                                                                                                                                        |
| N | Q99PP9 | DE | Estrogen-responsive B box protein;                                                                                                                                                                                                                        |
| N | Q99PP9 | DE | Tripartite motif-containing protein 16;                                                                                                                                                                                                                   |
| N | Q99PP9 | DR | zinc ion binding                                                                                                                                                                                                                                          |
| N | Q99Q02 | CC | Involved in sarA attenuation                                                                                                                                                                                                                              |
| N | Q99Q02 | CC | Affects resistance to oxacillin and teicoplanin, as well as the synthesis of virulence factors (By similarity).                                                                                                                                           |
| N | Q99Q02 | DE | Regulatory protein msrR;                                                                                                                                                                                                                                  |
| N | Q99QY9 | CC | Part of the Sec protein translocase complex                                                                                                                                                                                                               |
| N | Q99QY9 | CC | Has a central role in coupling the hydrolysis of ATP to the transfer of proteins into and across the cell membrane, serving as an ATP-driven molecular motor driving the stepwise translocation of polypeptide chains across the membrane (By similarity) |
| N | Q99QY9 | CC | Interacts with the secYEG preprotein conducting channel                                                                                                                                                                                                   |
| N | Q99QY9 | DE | Protein translocase subunit secA 2;                                                                                                                                                                                                                       |
| N | Q99QY9 | DR | P-P-bond-hydrolysis-driven protein transmembrane transporter activity                                                                                                                                                                                     |
| N | Q99QY9 | DR | protein import                                                                                                                                                                                                                                            |
| N | Q99QY9 | DR | protein targeting                                                                                                                                                                                                                                         |
| N | Q99UA3 | CC | Part of a transport system that may be involved in oligopeptide uptake                                                                                                                                                                                    |
| N | Q99UA3 | CC | important for S.aureus growth and survival during the infection process (By similarity)                                                                                                                                                                   |
| N | Q99UA3 | CC | Probably responsible for energy coupling to the transport system                                                                                                                                                                                          |
| N | Q99UA3 | DE | Putative oligopeptide transport ATP-binding protein oppF2;                                                                                                                                                                                                |
| N | Q99UA3 | DR | ATPase activity                                                                                                                                                                                                                                           |
| N | Q99UA3 | DR | peptide transport                                                                                                                                                                                                                                         |
| N | Q99UA3 | DR | protein transport                                                                                                                                                                                                                                         |
| N | Q99WG0 | DE | Uncharacterized lipoprotein SAV0442;                                                                                                                                                                                                                      |
| N | Q99WG6 | DE | Uncharacterized lipoprotein SAV0436;                                                                                                                                                                                                                      |
| N | Q99YL4 | CC | Division component that associates with the complex late in its assembly, after the Z-ring is formed, and is dependent on divIC and PBP2B for its recruitment to the division                                                                             |
| N | Q99YL4 | CC | Also contributes to the recruitment of PBP1 to the division complex                                                                                                                                                                                       |
| N | Q99YL4 | CC | Its main role could be the removal of PBP1 from the cell pole after pole maturation is completed                                                                                                                                                          |
| N | Q99YL4 | CC | Not essential for septum formation (By similarity).                                                                                                                                                                                                       |
| N | Q99YL4 | CC | Together with ezrA, is a key component of the system that regulates PBP1 localization during cell cycle progression                                                                                                                                       |
| N | Q99YL4 | DE | Cell cycle protein gpsB;                                                                                                                                                                                                                                  |
| N | Q99YL4 | DE | Guiding PBP1-shuttling protein;                                                                                                                                                                                                                           |
| N | Q99YL4 | DR | cell division                                                                                                                                                                                                                                             |
| N | Q99YL4 | DR | regulation of cell shape                                                                                                                                                                                                                                  |
| N | Q99ZB6 | CC | Has a role in maltotetraose utilization (By similarity).                                                                                                                                                                                                  |
| N | Q99ZB6 | DE | Maltodextrose utilization protein malA;                                                                                                                                                                                                                   |
| N | Q9A088 | CC | Necessary for normal cell division and for the maintenance of normal septation (By similarity).                                                                                                                                                           |
| N | Q9A088 | DE | Probable GTP-binding protein EngB;                                                                                                                                                                                                                        |
| N | Q9A088 | DR | barrier septum formation                                                                                                                                                                                                                                  |
| N | Q9A229 | CC | IGPS catalyzes the conversion of PKFAR and glutamine to IGP, AICAR and glutamate                                                                                                                                                                          |

|   |        |    |                                                                                                                                                                                                                        |
|---|--------|----|------------------------------------------------------------------------------------------------------------------------------------------------------------------------------------------------------------------------|
| N | Q9A229 | CC | The hisF subunit catalyzes the cyclization activity that produces IGP and AICAR from PRFAR using the ammonia provided by the hisH subunit (By similarity).                                                             |
| N | Q9A229 | DE | IGP synthase cyclase subunit;                                                                                                                                                                                          |
| N | Q9A229 | DE | IGP synthase subunit hisF;                                                                                                                                                                                             |
| N | Q9A229 | DE | IGPS subunit hisF;                                                                                                                                                                                                     |
| N | Q9A229 | DE | ImGP synthase subunit hisF;                                                                                                                                                                                            |
| N | Q9A229 | DE | Imidazole glycerol phosphate synthase subunit hisF;                                                                                                                                                                    |
| N | Q9A229 | DR | histidine biosynthetic process                                                                                                                                                                                         |
| N | Q9A229 | DR | imidazoleglycerol-phosphate synthase activity                                                                                                                                                                          |
| N | Q9A229 | DR | lyase activity                                                                                                                                                                                                         |
| N | Q9A3K2 | CC | With S4 and S5 plays an important role in translational accuracy (By similarity).                                                                                                                                      |
| N | Q9A3K2 | DE | 30S ribosomal protein S12;                                                                                                                                                                                             |
| N | Q9A3K2 | DR | structural constituent of ribosome                                                                                                                                                                                     |
| N | Q9ABF8 | CC | May play a role in DNA repair                                                                                                                                                                                          |
| N | Q9ABF8 | CC | It may act with recF and recO (By similarity).                                                                                                                                                                         |
| N | Q9ABF8 | CC | it seems to be involved in an recBC-independent recombinational process of DNA repair                                                                                                                                  |
| N | Q9ABF8 | DE | Recombination protein recR;                                                                                                                                                                                            |
| N | Q9ABF8 | DR | DNA recombination                                                                                                                                                                                                      |
| N | Q9ABF8 | DR | metal ion binding                                                                                                                                                                                                      |
| N | Q9ABW5 | CC | Catalyzes the decarboxylation of orotidine 5'- monophosphate (OMP) to uridine 5'-monophosphate (UMP) (By similarity).                                                                                                  |
| N | Q9ABW5 | DE | OMP decarboxylase;                                                                                                                                                                                                     |
| N | Q9ABW5 | DE | Orotidine 5'-phosphate decarboxylase;                                                                                                                                                                                  |
| N | Q9ABW5 | DR | 'de novo' UMP biosynthetic process                                                                                                                                                                                     |
| N | Q9ABW5 | DR | 'de novo' pyrimidine base biosynthetic process                                                                                                                                                                         |
| N | Q9ABW5 | DR | orotidine-5'-phosphate decarboxylase activity                                                                                                                                                                          |
| N | Q9ABZ9 | CC | required for the formation of a threonylcarbamoyl group on adenosine at position 37 (t(6)A37) in tRNAs that read codons beginning with adenine (By similarity)                                                         |
| N | Q9ABZ9 | DE | Probable tRNA threonylcarbamoyladenosine biosynthesis protein Gcp;                                                                                                                                                     |
| N | Q9ABZ9 | DE | t(6)A37 threonylcarbamoyladenosine biosynthesis protein;                                                                                                                                                               |
| N | Q9ABZ9 | DR | metal ion binding                                                                                                                                                                                                      |
| N | Q9ABZ9 | DR | metalloendopeptidase activity                                                                                                                                                                                          |
| N | Q9AC57 | DE | Shikimate dehydrogenase;                                                                                                                                                                                               |
| N | Q9AC57 | DR | aromatic amino acid family biosynthetic process                                                                                                                                                                        |
| N | Q9AC57 | DR | oxidation-reduction process                                                                                                                                                                                            |
| N | Q9AC57 | DR | shikimate 5-dehydrogenase activity                                                                                                                                                                                     |
| N | Q9B9E4 | CC | Component of the ubiquinol-cytochrome c reductase complex (complex III or cytochrome b-c1 complex), which is a respiratory chain that generates an electrochemical potential coupled to ATP synthesis (By similarity). |
| N | Q9B9E4 | DE | Complex III subunit 3;                                                                                                                                                                                                 |
| N | Q9B9E4 | DE | Complex III subunit III;                                                                                                                                                                                               |
| N | Q9B9E4 | DE | Cytochrome b-c1 complex subunit 3;                                                                                                                                                                                     |
| N | Q9B9E4 | DE | Cytochrome b;                                                                                                                                                                                                          |
| N | Q9B9E4 | DE | Ubiquinol-cytochrome-c reductase complex cytochrome b subunit;                                                                                                                                                         |
| N | Q9B9E4 | DR | electron carrier activity                                                                                                                                                                                              |
| N | Q9B9E4 | DR | metal ion binding                                                                                                                                                                                                      |
| N | Q9B9E4 | DR | oxidoreductase activity                                                                                                                                                                                                |
| N | Q9B9E4 | DR | respiratory electron transport chain                                                                                                                                                                                   |
| N | Q9BAC0 | CC | Probably a ribosomal protein or a ribosome-associated protein (By similarity).                                                                                                                                         |
| N | Q9BAC0 | DE | Probable 30S ribosomal protein 3, chloroplastic;                                                                                                                                                                       |
| N | Q9BAC0 | DR | structural constituent of ribosome                                                                                                                                                                                     |
| N | Q9BP45 | DE | Conotoxin PnMLKM-D0211;                                                                                                                                                                                                |
| N | Q9BP45 | DE | DE Flags: Precursor; Fragment;                                                                                                                                                                                         |
| N | Q9BP72 | DE | Conotoxin ArMSG1-0124;                                                                                                                                                                                                 |
| N | Q9BP72 | DR | ion channel inhibitor activity                                                                                                                                                                                         |
| N | Q9BPU6 | CC | May have a function in neuronal differentiation and/or axon growth.                                                                                                                                                    |
| N | Q9BPU6 | DE | CRMP3-associated molecule;                                                                                                                                                                                             |
| N | Q9BPU6 | DE | Collapsin response mediator protein 5;                                                                                                                                                                                 |
| N | Q9BPU6 | DE | Dihydropyrimidinase-related protein 5;                                                                                                                                                                                 |
| N | Q9BPU6 | DE | UNC33-like phosphoprotein 6;                                                                                                                                                                                           |
| N | Q9BPU6 | DR | axon guidance                                                                                                                                                                                                          |
| N | Q9BPU6 | DR | hydrolase activity, acting on carbon-nitrogen (but not peptide) bonds                                                                                                                                                  |
| N | Q9BPU6 | DR | signal transduction                                                                                                                                                                                                    |
| N | Q9BQ13 | DE | BTB/POZ domain-containing protein KCTD14;                                                                                                                                                                              |
| N | Q9BQ13 | DR | voltage-gated potassium channel activity                                                                                                                                                                               |

|   |        |    |                                                                                                                                                                                                                   |
|---|--------|----|-------------------------------------------------------------------------------------------------------------------------------------------------------------------------------------------------------------------|
| N | Q9BS26 | CC | Mediates thiol-dependent retention in the early secretory pathway, forming mixed disulfides with substrate proteins through its conserved CRFS motif                                                              |
| N | Q9BS26 | CC | Inhibits the calcium channel activity of ITPR1                                                                                                                                                                    |
| N | Q9BS26 | CC | may have a role in the control of oxidative protein folding in the endoplasmic reticulum                                                                                                                          |
| N | Q9BS26 | CC | Required to retain ERO1L and ERO1LB in the endoplasmic reticulum.                                                                                                                                                 |
| N | Q9BS26 | DE | ER protein 44;                                                                                                                                                                                                    |
| N | Q9BS26 | DE | Endoplasmic reticulum resident protein 44;                                                                                                                                                                        |
| N | Q9BS26 | DE | Thioredoxin domain-containing protein 4;                                                                                                                                                                          |
| N | Q9BS26 | DR | cell redox homeostasis                                                                                                                                                                                            |
| N | Q9BS26 | DR | glycoprotein metabolic process                                                                                                                                                                                    |
| N | Q9BS26 | DR | protein binding                                                                                                                                                                                                   |
| N | Q9BS26 | DR | protein disulfide isomerase activity                                                                                                                                                                              |
| N | Q9BS26 | DR | protein folding                                                                                                                                                                                                   |
| N | Q9BS26 | DR | response to unfolded protein                                                                                                                                                                                      |
| N | Q9BSJ6 | DE | Protein FAM64A;                                                                                                                                                                                                   |
| N | Q9BSJ6 | DR | protein binding                                                                                                                                                                                                   |
| N | Q9BV68 | DE | RING finger protein 126;                                                                                                                                                                                          |
| N | Q9BV68 | DR | protein binding                                                                                                                                                                                                   |
| N | Q9BV68 | DR | zinc ion binding                                                                                                                                                                                                  |
| N | Q9BVC4 | CC | Subunit of both mTORC1 and mTORC2, which regulates cell growth and survival in response to nutrient and hormonal signals                                                                                          |
| N | Q9BVC4 | CC | Activated mTORC1 up-regulates protein synthesis by phosphorylating key regulators of mRNA translation and ribosome synthesis                                                                                      |
| N | Q9BVC4 | CC | Amino-acid-signaling to mTORC1 requires its relocalization to the lysosomes mediated by the Ragulator complex and the Rag GTPases                                                                                 |
| N | Q9BVC4 | CC | Growth factor-stimulated mTORC1 activation involves a AKT1- mediated phosphorylation of TSC1-TSC2, which leads to the activation of the RHEB GTPase that potently activates the protein kinase activity of mTORC1 |
| N | Q9BVC4 | CC | In nutrient- poor conditions, stabilizes the MTOR-RPTOR interaction and favors RPTOR-mediated inhibition of MTOR activity                                                                                         |
| N | Q9BVC4 | CC | Within mTORC1, LST8 interacts directly with mTOR and enhances its kinase activity                                                                                                                                 |
| N | Q9BVC4 | CC | mTORC1 is activated in response to growth factors or amino-acids                                                                                                                                                  |
| N | Q9BVC4 | CC | mTORC1 phosphorylates EIF4EBP1 and releases it from inhibiting the elongation initiation factor 4E (eIF4E)                                                                                                        |
| N | Q9BVC4 | CC | mTORC1 phosphorylates and activates S6K1 at 'Thr-389', which then promotes protein synthesis by phosphorylating PDCD4 and targeting it for degradation                                                            |
| N | Q9BVC4 | CC | mTORC2 also modulates the phosphorylation of PRKCA on 'Ser-657'.                                                                                                                                                  |
| N | Q9BVC4 | CC | mTORC2 is also activated by growth factors, but seems to be nutrient-insensitive                                                                                                                                  |
| N | Q9BVC4 | CC | mTORC2 plays a critical role in AKT1 'Ser-473' phosphorylation, which may facilitate the phosphorylation of the activation loop of AKT1 on 'Thr-308' by PDK1 which is a prerequisite for full activation          |
| N | Q9BVC4 | CC | mTORC2 promotes the serum- induced formation of stress-fibers or F-actin                                                                                                                                          |
| N | Q9BVC4 | CC | mTORC2 regulates the phosphorylation of SGK1 at 'Ser-422'                                                                                                                                                         |
| N | Q9BVC4 | CC | mTORC2 seems to function upstream of Rho GTPases to regulate the actin cytoskeleton, probably by activating one or more Rho-type guanine nucleotide exchange factors                                              |
| N | Q9BVC4 | DE | G protein beta subunit-like;                                                                                                                                                                                      |
| N | Q9BVC4 | DE | Mammalian lethal with SEC13 protein 8;                                                                                                                                                                            |
| N | Q9BVC4 | DE | Protein GbetaL;                                                                                                                                                                                                   |
| N | Q9BVC4 | DE | TORC subunit LST8;                                                                                                                                                                                                |
| N | Q9BVC4 | DE | Target of rapamycin complex subunit LST8;                                                                                                                                                                         |
| N | Q9BVC4 | DR | T cell costimulation                                                                                                                                                                                              |
| N | Q9BVC4 | DR | insulin receptor signaling pathway                                                                                                                                                                                |
| N | Q9BVC4 | DR | nerve growth factor receptor signaling pathway                                                                                                                                                                    |
| N | Q9BVC4 | DR | phosphatidylinositol-mediated signaling                                                                                                                                                                           |
| N | Q9BVC4 | DR | positive regulation of TOR signaling cascade                                                                                                                                                                      |
| N | Q9BVC4 | DR | protein binding                                                                                                                                                                                                   |
| N | Q9BVC4 | DR | regulation of actin cytoskeleton organization                                                                                                                                                                     |
| N | Q9BXU3 | DE | Testis-expressed sequence 13A protein;                                                                                                                                                                            |
| N | Q9BXU3 | DR | zinc ion binding                                                                                                                                                                                                  |
| N | Q9BY49 | CC | Participates in chain elongation of fatty acids                                                                                                                                                                   |
| N | Q9BY49 | CC | Has no 2,4-dienoyl-CoA reductase activity.                                                                                                                                                                        |
| N | Q9BY49 | DE | 2,4-dienoyl-CoA reductase-related protein;                                                                                                                                                                        |
| N | Q9BY49 | DE | Peroxisomal trans-2-enoyl-CoA reductase;                                                                                                                                                                          |
| N | Q9BY49 | DR | fatty acid biosynthetic process                                                                                                                                                                                   |

|   |        |    |                                                                                                                                                                                   |
|---|--------|----|-----------------------------------------------------------------------------------------------------------------------------------------------------------------------------------|
| N | Q9BY49 | DR | oxidation-reduction process                                                                                                                                                       |
| N | Q9BY49 | DR | regulation of apoptosis                                                                                                                                                           |
| N | Q9BY49 | DR | trans-2-enoyl-CoA reductase (NADPH) activity                                                                                                                                      |
| N | Q9C168 | CC | Occurs in almost all aerobically respiring organisms and serves to protect cells from the toxic effects of hydrogen peroxide (By similarity).                                     |
| N | Q9C168 | DR | catalase activity                                                                                                                                                                 |
| N | Q9C168 | DR | conidium formation                                                                                                                                                                |
| N | Q9C168 | DR | hydrogen peroxide catabolic process                                                                                                                                               |
| N | Q9C168 | DR | oxidation-reduction process                                                                                                                                                       |
| N | Q9C245 | CC | Acts as a sulfur carrier required for 2-thiolation of mcm(5)S(2)U at tRNA wobble positions                                                                                        |
| N | Q9C245 | CC | Indirectly involved in oxidative stress response and regulation of budding and haploid invasive growth (By similarity).                                                           |
| N | Q9C245 | CC | May also act as an ubiquitin-like protein that is covalently conjugated to other proteins such as AHP1; the relevance of such function is however unclear in vivo                 |
| N | Q9C245 | CC | For mcm(5) tRNA modification by the elongator complex is required for 2-thiolation                                                                                                |
| N | Q9C245 | CC | Serves as sulfur donor in tRNA 2-thiolation reaction by being thiocarboxylated (-COSH) at its C-terminus by UBA4                                                                  |
| N | Q9C245 | CC | The sulfur is then transferred to tRNA to form 2-thiolation of mcm(5)S(2)U                                                                                                        |
| N | Q9C245 | DE | Ubiquitin-related modifier 1;                                                                                                                                                     |
| N | Q9C245 | DR | tRNA thio-modification                                                                                                                                                            |
| N | Q9C5K8 | CC | Repressor of jasmonate responses negatively regulated by the proteasome in an SCF(COI1) E3 ubiquitin-protein ligase complex-dependent manner (By similarity)                      |
| N | Q9C5K8 | DE | Jasmonate ZIM domain-containing protein 12;                                                                                                                                       |
| N | Q9C5K8 | DE | Protein TIFY 3B;                                                                                                                                                                  |
| N | Q9C5K8 | DR | defense response                                                                                                                                                                  |
| N | Q9C5K8 | DR | protein binding                                                                                                                                                                   |
| N | Q9C889 | CC | May be involved in both secretory and endocytic intracellular trafficking in the endosomal/prevacuolar compartments (By similarity).                                              |
| N | Q9C889 | DE | PRA1 family protein F2;                                                                                                                                                           |
| N | Q9C889 | DR | protein binding                                                                                                                                                                   |
| N | Q9C889 | DR | vesicle-mediated transport                                                                                                                                                        |
| N | Q9CBJ5 | DE | 50S ribosomal protein L33 2;                                                                                                                                                      |
| N | Q9CBJ5 | DR | structural constituent of ribosome                                                                                                                                                |
| N | Q9CC12 | DE | Acetylornithine aminotransferase;                                                                                                                                                 |
| N | Q9CC12 | DR | N2-acetyl-L-ornithine:2-oxoglutarate 5-aminotransferase activity                                                                                                                  |
| N | Q9CC12 | DR | arginine biosynthetic process                                                                                                                                                     |
| N | Q9CC12 | DR | pyridoxal phosphate binding                                                                                                                                                       |
| N | Q9CCS0 | CC | Involved in peptide bond synthesis                                                                                                                                                |
| N | Q9CCS0 | CC | Probably functions indirectly by altering the affinity of the ribosome for aminoacyl-tRNA, thus increasing their reactivity as acceptors for peptidyl transferase (By similarity) |
| N | Q9CCS0 | CC | Stimulates efficient translation and peptide-bond synthesis on native or reconstituted 70S ribosomes in vitro                                                                     |
| N | Q9CCS0 | DE | Elongation factor P;                                                                                                                                                              |
| N | Q9CCS0 | DR | peptide biosynthetic process                                                                                                                                                      |
| N | Q9CCS0 | DR | translation elongation factor activity                                                                                                                                            |
| N | Q9CDW1 | CC | Involved in the binding of tRNA to the ribosomes (By similarity).                                                                                                                 |
| N | Q9CDW1 | DE | 30S ribosomal protein S10;                                                                                                                                                        |
| N | Q9CDW1 | DR | structural constituent of ribosome                                                                                                                                                |
| N | Q9CE00 | DE | Putative glutamine amidotransferase-like protein yvdE;                                                                                                                            |
| N | Q9CE00 | DR | glutamine metabolic process                                                                                                                                                       |
| N | Q9CE00 | DR | hydrolase activity                                                                                                                                                                |
| N | Q9CE00 | DR | transferase activity                                                                                                                                                              |
| N | Q9CFB6 | CC | An accessory protein needed during the final step in the assembly of 30S ribosomal subunit, possibly for assembly of the head region                                              |
| N | Q9CFB6 | CC | Essential for efficient processing of 16S rRNA                                                                                                                                    |
| N | Q9CFB6 | CC | It has affinity for free ribosomal 30S subunits but not for 70S ribosomes (By similarity)                                                                                         |
| N | Q9CFB6 | CC | May be needed both before and after rbfA during the maturation of 16S rRNA                                                                                                        |
| N | Q9CFB6 | CC | Probably interacts with S19                                                                                                                                                       |
| N | Q9CFB6 | DE | Ribosome maturation factor rimM;                                                                                                                                                  |
| N | Q9CFB6 | DR | rRNA processing                                                                                                                                                                   |
| N | Q9CFB6 | DR | ribosome binding                                                                                                                                                                  |
| N | Q9CFF3 | CC | Part of a stress-induced multi-chaperone system, it is involved in the recovery of the cell from heat-induced damage, in cooperation with DnaK, DnaJ and GrpE                     |
| N | Q9CFF3 | CC | Acts before DnaK, in the processing of protein aggregates                                                                                                                         |

|   |        |    |                                                                                                                                                                                                                                                                                                                      |
|---|--------|----|----------------------------------------------------------------------------------------------------------------------------------------------------------------------------------------------------------------------------------------------------------------------------------------------------------------------|
| N | Q9CFF3 | CC | Protein binding stimulates the A1Pase activity; A1P hydrolysis unfolds the denatured protein aggregates, which probably helps expose new hydrophobic binding sites on the surface of ClpB-bound aggregates, contributing to the solubilization and refolding of denatured protein aggregates by DnaK (By similarity) |
| N | Q9CFF3 | DE | Chaperone protein ClpB;                                                                                                                                                                                                                                                                                              |
| N | Q9CFF3 | DR | nucleoside-triphosphatase activity                                                                                                                                                                                                                                                                                   |
| N | Q9CFF3 | DR | protein processing                                                                                                                                                                                                                                                                                                   |
| N | Q9CFF3 | DR | response to heat                                                                                                                                                                                                                                                                                                     |
| N | Q9CI63 | DE | Prophage ps2 probable integrase;                                                                                                                                                                                                                                                                                     |
| N | Q9CI63 | DR | DNA integration                                                                                                                                                                                                                                                                                                      |
| N | Q9CI63 | DR | DNA recombination                                                                                                                                                                                                                                                                                                    |
| N | Q9CJS5 | CC | Carrier of the growing fatty acid chain in fatty acid biosynthesis (By similarity).                                                                                                                                                                                                                                  |
| N | Q9CJS5 | DE | Acyl carrier protein;                                                                                                                                                                                                                                                                                                |
| N | Q9CJS5 | DR | acyl carrier activity                                                                                                                                                                                                                                                                                                |
| N | Q9CJS5 | DR | cofactor binding                                                                                                                                                                                                                                                                                                     |
| N | Q9CJS5 | DR | fatty acid biosynthetic process                                                                                                                                                                                                                                                                                      |
| N | Q9CJS5 | DR | phosphopantetheine binding                                                                                                                                                                                                                                                                                           |
| N | Q9CK89 | DE | 50S ribosomal protein L10;                                                                                                                                                                                                                                                                                           |
| N | Q9CK89 | DR | ribosome biogenesis                                                                                                                                                                                                                                                                                                  |
| N | Q9CK89 | DR | structural constituent of ribosome                                                                                                                                                                                                                                                                                   |
| N | Q9CKD7 | CC | Putative quercetin 2,3-dioxygenase (By similarity).                                                                                                                                                                                                                                                                  |
| N | Q9CKD7 | DE | Pirin-like protein PM1685;                                                                                                                                                                                                                                                                                           |
| N | Q9CKD7 | DE | Putative quercetin 2,3-dioxygenase PM1685;                                                                                                                                                                                                                                                                           |
| N | Q9CKD7 | DE | Putative quercetinase;                                                                                                                                                                                                                                                                                               |
| N | Q9CKD7 | DR | metal ion binding                                                                                                                                                                                                                                                                                                    |
| N | Q9CKD7 | DR | oxidation-reduction process                                                                                                                                                                                                                                                                                          |
| N | Q9CKD7 | DR | quercetin 2,3-dioxygenase activity                                                                                                                                                                                                                                                                                   |
| N | Q9CKN5 | CC | The phosphoenolpyruvate-dependent sugar phosphotransferase system (sugar PTS), a major carbohydrate active -transport system, catalyzes the phosphorylation of incoming sugar substrates concomitantly with their translocation across the cell membrane                                                             |
| N | Q9CKN5 | CC | It is also able to take up anhydro-N-acetylmuramic acid (anhydro-MurNAc), but cannot phosphorylate the carbon 6, probably because of the 1,6-anhydro ring (By similarity)                                                                                                                                            |
| N | Q9CKN5 | CC | This system is involved in N-acetylmuramic acid (MurNAc) transport, yielding cytoplasmic MurNAc-6-P                                                                                                                                                                                                                  |
| N | Q9CKN5 | DE | EIIBC-MurNAc;                                                                                                                                                                                                                                                                                                        |
| N | Q9CKN5 | DE | N-acetylmuramic acid permease IIC component;                                                                                                                                                                                                                                                                         |
| N | Q9CKN5 | DE | N-acetylmuramic acid-specific phosphotransferase enzyme IIB component;                                                                                                                                                                                                                                               |
| N | Q9CKN5 | DE | PTS system N-acetylmuramic acid-specific EIIB component;                                                                                                                                                                                                                                                             |
| N | Q9CKN5 | DE | PTS system N-acetylmuramic acid-specific EIIBC component;                                                                                                                                                                                                                                                            |
| N | Q9CKN5 | DE | PTS system N-acetylmuramic acid-specific EIIC component;                                                                                                                                                                                                                                                             |
| N | Q9CKN5 | DR | kinase activity                                                                                                                                                                                                                                                                                                      |
| N | Q9CKN5 | DR | phosphoenolpyruvate-dependent sugar phosphotransferase system                                                                                                                                                                                                                                                        |
| N | Q9CKN5 | DR | protein-N(Pi)-phosphohistidine-sugar phosphotransferase activity                                                                                                                                                                                                                                                     |
| N | Q9CKN5 | DR | sugar:hydrogen symporter activity                                                                                                                                                                                                                                                                                    |
| N | Q9CME6 | CC | Catalyzes the phosphorylation of D-glycero-D-manno- heptose 7-phosphate at the C-1 position to form D,D-heptose-1,7- bisphosphate (By similarity).                                                                                                                                                                   |
| N | Q9CME6 | DE | Bifunctional protein hldE;                                                                                                                                                                                                                                                                                           |
| N | Q9CME6 | DE | D-beta-D-heptose 1-phosphate adenosyltransferase;                                                                                                                                                                                                                                                                    |
| N | Q9CME6 | DE | D-beta-D-heptose 7-phosphate kinase;                                                                                                                                                                                                                                                                                 |
| N | Q9CME6 | DE | D-beta-D-heptose 7-phosphotransferase;                                                                                                                                                                                                                                                                               |
| N | Q9CME6 | DR | kinase activity                                                                                                                                                                                                                                                                                                      |
| N | Q9CME6 | DR | lipopolysaccharide biosynthetic process                                                                                                                                                                                                                                                                              |
| N | Q9CME6 | DR | nucleotidyltransferase activity                                                                                                                                                                                                                                                                                      |
| N | Q9CME6 | DR | phosphotransferase activity, alcohol group as acceptor                                                                                                                                                                                                                                                               |
| N | Q9CN18 | CC | This protein is one of the two subunits of integration host factor, a specific DNA-binding protein that functions in genetic recombination as well as in transcriptional and translational control (By similarity).                                                                                                  |
| N | Q9CN18 | DE | Integration host factor subunit alpha;                                                                                                                                                                                                                                                                               |
| N | Q9CN18 | DR | DNA recombination                                                                                                                                                                                                                                                                                                    |
| N | Q9CN18 | DR | regulation of transcription, DNA-dependent                                                                                                                                                                                                                                                                           |
| N | Q9CN18 | DR | regulation of translation                                                                                                                                                                                                                                                                                            |
| N | Q9CQJ0 | DE | Thioesterase superfamily member 5;                                                                                                                                                                                                                                                                                   |
| N | Q9CQJ0 | DR | hydrolase activity                                                                                                                                                                                                                                                                                                   |
| N | Q9CQU3 | CC | Involved in the retrieval of endoplasmic reticulum membrane proteins from the early Golgi compartment (By similarity).                                                                                                                                                                                               |

|   |        |    |                                                                                                                                                              |
|---|--------|----|--------------------------------------------------------------------------------------------------------------------------------------------------------------|
| N | Q9CQU3 | DE | Protein RER1;                                                                                                                                                |
| N | Q9CR30 | CC | Cleaves 'Lys-63'-linked poly-ubiquitin chains, and with lesser efficiency 'Lys-48'-linked poly-ubiquitin chains (in vitro)                                   |
| N | Q9CR30 | CC | May act as a deubiquitinating enzyme (By similarity).                                                                                                        |
| N | Q9CR30 | DE | Josephin domain-containing protein 2;                                                                                                                        |
| N | Q9CWF2 | CC | Tubulin is the major constituent of microtubules                                                                                                             |
| N | Q9CWF2 | CC | It binds two moles of GTP, one at an exchangeable site on the beta chain and one at a non-exchangeable site on the alpha-chain (By similarity)               |
| N | Q9CWF2 | CC | TUBB2B is implicated in neuronal migration (By similarity).                                                                                                  |
| N | Q9CWF2 | DE | Tubulin beta-2B chain;                                                                                                                                       |
| N | Q9CWF2 | DR | GTPase activity                                                                                                                                              |
| N | Q9CWF2 | DR | microtubule-based movement                                                                                                                                   |
| N | Q9CWF2 | DR | protein polymerization                                                                                                                                       |
| N | Q9CWF2 | DR | structural molecule activity                                                                                                                                 |
| N | Q9CWH0 | CC | May play a role in maintaining cell pluripotentiality May play a role in embryo preimplantation development.                                                 |
| N | Q9CWH0 | DE | Developmental pluripotency-associated protein 2;                                                                                                             |
| N | Q9CWH0 | DE | Pluripotent embryonic stem cell-related gene 1 protein;                                                                                                      |
| N | Q9CWH0 | DR | nucleic acid binding                                                                                                                                         |
| N | Q9CWV1 | CC | May have a role in the control of cell proliferation                                                                                                         |
| N | Q9CWV1 | CC | Appears to be involved in the activation of the prereplicative complex (pre-RC) during G(1) phase by recruiting CDC6 to the origin recognition complex (ORC) |
| N | Q9CWV1 | CC | Binds chromatin throughout the cell cycle (By similarity).                                                                                                   |
| N | Q9CWV1 | DE | DNA replication licensing factor MCM8;                                                                                                                       |
| N | Q9CWV1 | DE | Minichromosome maintenance 8;                                                                                                                                |
| N | Q9CWV1 | DR | DNA replication                                                                                                                                              |
| N | Q9CWV1 | DR | nucleoside-triphosphatase activity                                                                                                                           |
| N | Q9CY25 | CC | Part of the MIS12 complex which is required for normal chromosome alignment and segregation and for kinetochore formation during mitosis (By similarity).    |
| N | Q9CY25 | DE | Protein MIS12 homolog;                                                                                                                                       |
| N | Q9CY25 | DR | cell division                                                                                                                                                |
| N | Q9CY25 | DR | chromosome segregation                                                                                                                                       |
| N | Q9CY25 | DR | kinetochore assembly                                                                                                                                         |
| N | Q9D1G3 | CC | Negatively regulates N-terminal palmitoylation of SHH by HHAT/SKN.                                                                                           |
| N | Q9D1G3 | DE | Glycerol uptake/transporter homolog;                                                                                                                         |
| N | Q9D1G3 | DE | Hedgehog acyltransferase-like protein;                                                                                                                       |
| N | Q9D1G3 | DE | Protein-cysteine N-palmitoyltransferase HHAT-like protein;                                                                                                   |
| N | Q9D1G3 | DR | negative regulation of N-terminal protein palmitoylation                                                                                                     |
| N | Q9D1G3 | DR | protein binding                                                                                                                                              |
| N | Q9D2Q3 | DE | Uncharacterized protein C10orf88 homolog;                                                                                                                    |
| N | Q9D2Q3 | DR | identical protein binding                                                                                                                                    |
| N | Q9D6Z1 | CC | Required for 60S ribosomal subunit biogenesis (By similarity).                                                                                               |
| N | Q9D6Z1 | DE | Nucleolar protein 56;                                                                                                                                        |
| N | Q9D6Z1 | DE | Nucleolar protein 5A;                                                                                                                                        |
| N | Q9D6Z1 | DR | ribosome biogenesis                                                                                                                                          |
| N | Q9D7R7 | CC | Hydrolyzes a variety of proteins.                                                                                                                            |
| N | Q9D7R7 | DE | Pepsinogen C;                                                                                                                                                |
| N | Q9D7R7 | DR | aspartic-type endopeptidase activity                                                                                                                         |
| N | Q9D8X1 | CC | May play a role in copper homeostasis                                                                                                                        |
| N | Q9D8X1 | CC | Can bind one Cu(1+) per subunit (By similarity).                                                                                                             |
| N | Q9D8X1 | DE | Copper homeostasis protein cutC homolog;                                                                                                                     |
| N | Q9D8X1 | DR | copper ion binding                                                                                                                                           |
| N | Q9D8X1 | DR | copper ion homeostasis                                                                                                                                       |
| N | Q9D9F8 | DE | Mirror-image polydactyly gene 1 protein homolog;                                                                                                             |
| N | Q9D9Z5 | CC | May be involved in ubiquitination and subsequent proteasomal degradation of target proteins                                                                  |
| N | Q9D9Z5 | CC | Component of the DDD- E2 complexes which may provide a platform for interaction with CUL4A and WD repeat proteins (By similarity).                           |
| N | Q9D9Z5 | DE | DET1- and DDB1-associated protein 1;                                                                                                                         |
| N | Q9DA80 | DE | Radial spoke head protein 3 homolog B;                                                                                                                       |
| N | Q9DA80 | DE | Radial spoke head-like protein 2B;                                                                                                                           |
| N | Q9DCH2 | CC | Component of ribonuclease P, a protein complex that generates mature tRNA molecules by cleaving their 5'-ends (By similarity).                               |
| N | Q9DCH2 | DE | RNaseP protein p20;                                                                                                                                          |
| N | Q9DCH2 | DE | Ribonuclease P protein subunit p20;                                                                                                                          |

|   |        |    |                                                                                                                                                                                                                                                           |
|---|--------|----|-----------------------------------------------------------------------------------------------------------------------------------------------------------------------------------------------------------------------------------------------------------|
| N | Q9DCH2 | DR | nucleic acid binding                                                                                                                                                                                                                                      |
| N | Q9DCH2 | DR | ribonuclease P activity                                                                                                                                                                                                                                   |
| N | Q9DCH2 | DR | tRNA processing                                                                                                                                                                                                                                           |
| N | Q9EA41 | CC | RNA-dependent RNA polymerase which is responsible for replication and transcription of virus segments                                                                                                                                                     |
| N | Q9EA41 | CC | Binds the promoter sequence of the encapsidated viral RNA                                                                                                                                                                                                 |
| N | Q9EA41 | CC | Cleaves cellular pre-miRNA to generate primers for viral transcription (By similarity)                                                                                                                                                                    |
| N | Q9EA41 | CC | Displays an endonuclease activity involved in cap-stealing                                                                                                                                                                                                |
| N | Q9EA41 | DE | Polymerase basic protein 1;                                                                                                                                                                                                                               |
| N | Q9EA41 | DE | RNA-directed RNA polymerase catalytic subunit;                                                                                                                                                                                                            |
| N | Q9EA41 | DE | RNA-directed RNA polymerase subunit P1;                                                                                                                                                                                                                   |
| N | Q9EA41 | DR | RNA-directed RNA polymerase activity                                                                                                                                                                                                                      |
| N | Q9EA41 | DR | nucleotide binding                                                                                                                                                                                                                                        |
| N | Q9EA41 | DR | viral genome replication                                                                                                                                                                                                                                  |
| N | Q9EP93 | CC | Putative pheromone receptor implicated in the regulation of social and reproductive behavior.                                                                                                                                                             |
| N | Q9EP93 | DE | Pheromone receptor VN5;                                                                                                                                                                                                                                   |
| N | Q9EP93 | DE | Vomerolateral receptor 5;                                                                                                                                                                                                                                 |
| N | Q9EP93 | DE | Vomerolateral type-1 receptor 53;                                                                                                                                                                                                                         |
| N | Q9EP93 | DE | Vomerolateral type-1 receptor B3;                                                                                                                                                                                                                         |
| N | Q9EP93 | DR | pheromone receptor activity                                                                                                                                                                                                                               |
| N | Q9EP93 | DR | response to pheromone                                                                                                                                                                                                                                     |
| N | Q9EP93 | DR | sensory perception of chemical stimulus                                                                                                                                                                                                                   |
| N | Q9ESI9 | CC | Factor that induces terminal differentiation of late- developing B-cells to immunoglobulin secreting cells.                                                                                                                                               |
| N | Q9ESI9 | DE | Eosinophil differentiation factor;                                                                                                                                                                                                                        |
| N | Q9ESI9 | DE | Interleukin-5;                                                                                                                                                                                                                                            |
| N | Q9ESI9 | DE | T-cell replacing factor;                                                                                                                                                                                                                                  |
| N | Q9ESI9 | DR | cytokine activity                                                                                                                                                                                                                                         |
| N | Q9ESI9 | DR | growth factor activity                                                                                                                                                                                                                                    |
| N | Q9ESI9 | DR | immune response                                                                                                                                                                                                                                           |
| N | Q9ESI9 | DR | interleukin-5 receptor binding                                                                                                                                                                                                                            |
| N | Q9ESK4 | CC | Seems to be involved in p53/TP53 activation and p53/TP53-dependent apoptotic pathways, probably by enhancing acetylation of p53/TP53                                                                                                                      |
| N | Q9ESK4 | CC | Component of a mSin3A-like corepressor complex, which is probably involved in deacetylation of nucleosomal histones                                                                                                                                       |
| N | Q9ESK4 | CC | ING2 activity seems to be modulated by binding to phosphoinositides (PtdInsPs) (By similarity).                                                                                                                                                           |
| N | Q9ESK4 | DE | Inhibitor of growth 1-like protein;                                                                                                                                                                                                                       |
| N | Q9ESK4 | DE | Inhibitor of growth protein 2;                                                                                                                                                                                                                            |
| N | Q9ESK4 | DR | chromatin modification                                                                                                                                                                                                                                    |
| N | Q9ESK4 | DR | regulation of growth                                                                                                                                                                                                                                      |
| N | Q9ESK4 | DR | transcription activator activity                                                                                                                                                                                                                          |
| N | Q9ESK4 | DR | zinc ion binding                                                                                                                                                                                                                                          |
| N | Q9ESL8 | CC | Induces hepatocellular proliferation                                                                                                                                                                                                                      |
| N | Q9ESL8 | CC | Has no biological effect on the heart (By similarity).                                                                                                                                                                                                    |
| N | Q9ESL8 | DE | Fibroblast growth factor 16;                                                                                                                                                                                                                              |
| N | Q9ESL8 | DR | growth factor activity                                                                                                                                                                                                                                    |
| N | Q9EV32 | CC | Pasteurella leukotoxins are exotoxins that attack host leukocytes and especially polymorphonuclear cells, by causing cell rupture                                                                                                                         |
| N | Q9EV32 | CC | It has also weak hemolytic activity.                                                                                                                                                                                                                      |
| N | Q9EV32 | CC | The leukotoxin binds to the host LFA-1 integrin and induces a signaling cascade leading to many biological effects, including tyrosine phosphorylation of the CD18 tail, elevation of the intracellular Ca(2+) and lysis of the host cell (By similarity) |
| N | Q9EV32 | CC | This leukotoxin is a major contributor to the pathogenesis of lung injury in ovine pneumonic pasteurellosis                                                                                                                                               |
| N | Q9EV32 | DR | calcium ion binding                                                                                                                                                                                                                                       |
| N | Q9EV32 | DR | hemolysis in other organism                                                                                                                                                                                                                               |
| N | Q9EXD4 | DE | Uncharacterized protein MG269.1 homolog;                                                                                                                                                                                                                  |
| N | Q9EYV5 | CC | Positively regulates the expression of about fifteen genes involved in acid resistance such as gadA, gadB and gadC                                                                                                                                        |
| N | Q9EYV5 | CC | Depending on the conditions (growth phase and medium), can repress gadW (By similarity)                                                                                                                                                                   |
| N | Q9EYV5 | CC | Negatively regulates perA expression in acidic conditions and positively regulates it in alkaline conditions.                                                                                                                                             |

|   |        |    |                                                                                                                                                                                                                  |
|---|--------|----|------------------------------------------------------------------------------------------------------------------------------------------------------------------------------------------------------------------|
| N | Q9EYV5 | DE | HTH-type transcriptional regulator gadX;                                                                                                                                                                         |
| N | Q9EYV5 | DR | regulation of transcription, DNA-dependent                                                                                                                                                                       |
| N | Q9EYV5 | DR | sequence-specific DNA binding                                                                                                                                                                                    |
| N | Q9EYV5 | DR | sequence-specific DNA binding transcription factor activity                                                                                                                                                      |
| N | Q9F672 | CC | Can catalyze the hydrolysis of ATP in the presence of single-stranded DNA, the ATP-dependent uptake of single-stranded DNA by duplex DNA, and the ATP-dependent hybridization of homologous single-stranded DNAs |
| N | Q9F672 | CC | It interacts with LexA causing its activation and leading to its autocatalytic cleavage (By similarity).                                                                                                         |
| N | Q9F672 | DE | Protein RecA;                                                                                                                                                                                                    |
| N | Q9F672 | DE | Recombinase A;                                                                                                                                                                                                   |
| N | Q9F672 | DR | DNA recombination                                                                                                                                                                                                |
| N | Q9F672 | DR | DNA-dependent ATPase activity                                                                                                                                                                                    |
| N | Q9F672 | DR | single-stranded DNA binding                                                                                                                                                                                      |
| N | Q9FF66 | CC | Accepts the ubiquitin from the E1 complex and catalyzes its covalent attachment to other proteins.                                                                                                               |
| N | Q9FF66 | DE | Ubiquitin carrier protein 22;                                                                                                                                                                                    |
| N | Q9FF66 | DE | Ubiquitin-conjugating enzyme E2 22;                                                                                                                                                                              |
| N | Q9FF66 | DR | post-translational protein modification                                                                                                                                                                          |
| N | Q9FF66 | DR | ubiquitin-dependent protein catabolic process                                                                                                                                                                    |
| N | Q9FF66 | DR | ubiquitin-protein ligase activity                                                                                                                                                                                |
| N | Q9FFN9 | CC | Might act as an E3 ubiquitin-protein ligase, or as part of E3 complex, which accepts ubiquitin from specific E2 ubiquitin- conjugating enzymes and then transfers it to substrates (By similarity).              |
| N | Q9FFN9 | DE | ARIADNE-like protein ARI13;                                                                                                                                                                                      |
| N | Q9FFN9 | DE | Probable E3 ubiquitin-protein ligase ARI13;                                                                                                                                                                      |
| N | Q9FFN9 | DE | Protein ariadne homolog 13;                                                                                                                                                                                      |
| N | Q9FFN9 | DR | ligase activity                                                                                                                                                                                                  |
| N | Q9FFN9 | DR | zinc ion binding                                                                                                                                                                                                 |
| N | Q9FGD6 | CC | Transcription factor that binds specifically to a 5'- AA[AG]G-3' consensus core sequence (By similarity).                                                                                                        |
| N | Q9FGD6 | DE | Dof zinc finger protein DOF5.8;                                                                                                                                                                                  |
| N | Q9FGD6 | DR | zinc ion binding                                                                                                                                                                                                 |
| N | Q9FGE7 | CC | Sequence-specific RNA-binding protein that regulates translation and mRNA stability by binding the 3'-UTR of target mRNAs (By similarity).                                                                       |
| N | Q9FGE7 | DE | Pumilio homolog 26;                                                                                                                                                                                              |
| N | Q9FGE7 | DR | regulation of translation                                                                                                                                                                                        |
| N | Q9FKI0 | CC | Cross-links actin filaments (F-actin)                                                                                                                                                                            |
| N | Q9FKI0 | CC | May regulate actin cytoarchitecture, cell cycle, cell division, cell elongation and cytoplasmic tractus (By similarity).                                                                                         |
| N | Q9FKI0 | CC | Stabilizes and prevents F-actin depolymerization mediated by profilin                                                                                                                                            |
| N | Q9FKI0 | DE | Fimbrin-like protein 2;                                                                                                                                                                                          |
| N | Q9FKI0 | DR | actin cytoskeleton organization                                                                                                                                                                                  |
| N | Q9FKI0 | DR | actin filament binding                                                                                                                                                                                           |
| N | Q9FKI0 | DR | pollen germination                                                                                                                                                                                               |
| N | Q9FKI0 | DR | pollen tube growth                                                                                                                                                                                               |
| N | Q9FLT3 | CC | May play a role in plant defense                                                                                                                                                                                 |
| N | Q9FLT3 | CC | Probably has no oxalate oxidase activity even if the active site is conserved.                                                                                                                                   |
| N | Q9FLT3 | DE | Germin-like protein subfamily 3 member 4;                                                                                                                                                                        |
| N | Q9FLT3 | DR | manganese ion binding                                                                                                                                                                                            |
| N | Q9FLT3 | DR | nutrient reservoir activity                                                                                                                                                                                      |
| N | Q9FQY8 | CC | Catalyzes the conversion of caffeic acid to ferulic acid and of 5-hydroxyferulic acid to sinapic acid                                                                                                            |
| N | Q9FQY8 | CC | The resulting products may subsequently be converted to the corresponding alcohols that are incorporated into lignins.                                                                                           |
| N | Q9FQY8 | DE | Caffeic acid 3-O-methyltransferase;                                                                                                                                                                              |
| N | Q9FQY8 | DE | S-adenosyl-L-methionine:caffeic acid 3-O-methyltransferase;                                                                                                                                                      |
| N | Q9FQY8 | DR | caffeate O-methyltransferase activity                                                                                                                                                                            |
| N | Q9FQY8 | DR | lignin biosynthetic process                                                                                                                                                                                      |
| N | Q9FQY8 | DR | protein dimerization activity                                                                                                                                                                                    |
| N | Q9FXI7 | CC | Core component of nucleosome                                                                                                                                                                                     |
| N | Q9FXI7 | CC | DNA accessibility is regulated via a complex set of post-translational modifications of histones, also called histone code, and nucleosome remodeling (By similarity)                                            |
| N | Q9FXI7 | CC | Histones thereby play a central role in transcription regulation, DNA repair, DNA replication and chromosomal stability                                                                                          |



|   |        |    |                                                                                                                                                                                                                                         |
|---|--------|----|-----------------------------------------------------------------------------------------------------------------------------------------------------------------------------------------------------------------------------------------|
| N | Q9FXI7 | CC | Nucleosomes wrap and compact DNA into chromatin, limiting DNA accessibility to the cellular machineries which require DNA as a template                                                                                                 |
| N | Q9FXI7 | DE | Histone H3-like 2;                                                                                                                                                                                                                      |
| N | Q9FXI7 | DE | Male gamete-specific histone H3;                                                                                                                                                                                                        |
| N | Q9FXI7 | DR | double fertilization forming a zygote and endosperm                                                                                                                                                                                     |
| N | Q9FXI7 | DR | nucleosome assembly                                                                                                                                                                                                                     |
| N | Q9FXI7 | DR | pollen sperm cell differentiation                                                                                                                                                                                                       |
| N | Q9FY99 | CC | Catalyzes the rate-limiting step of the oxidative pentose-phosphate pathway, which represents a route for the dissimilation of carbohydrates besides glycolysis                                                                         |
| N | Q9FY99 | CC | The main function of this enzyme is to provide reducing power (NADPH) and pentose phosphates for fatty acid and nucleic acid synthesis which are involved in membrane synthesis and cell division.                                      |
| N | Q9FY99 | DE | Glucose-6-phosphate 1-dehydrogenase 2, chloroplastic;                                                                                                                                                                                   |
| N | Q9FY99 | DR | glucose-6-phosphate dehydrogenase activity                                                                                                                                                                                              |
| N | Q9FY99 | DR | pentose-phosphate shunt, oxidative branch                                                                                                                                                                                               |
| N | Q9GPS1 | DE | LYR motif-containing protein 7;                                                                                                                                                                                                         |
| N | Q9GZU0 | DE | HBV X-transactivated gene 12 protein;                                                                                                                                                                                                   |
| N | Q9GZU0 | DE | HBV XAg-transactivated protein 12;                                                                                                                                                                                                      |
| N | Q9GZU0 | DE | Uncharacterized protein C6orf62;                                                                                                                                                                                                        |
| N | Q9GZZ1 | CC | Probable catalytic component of the NAA11-NAA15 complex which displays alpha (N-terminal) acetyltransferase activity.                                                                                                                   |
| N | Q9GZZ1 | DE | N-acetyltransferase 13;                                                                                                                                                                                                                 |
| N | Q9GZZ1 | DE | N-acetyltransferase 5;                                                                                                                                                                                                                  |
| N | Q9GZZ1 | DE | N-acetyltransferase san homolog;                                                                                                                                                                                                        |
| N | Q9GZZ1 | DE | N-alpha-acetyltransferase 50, NatE catalytic subunit;                                                                                                                                                                                   |
| N | Q9GZZ1 | DR | N-acetyltransferase activity                                                                                                                                                                                                            |
| N | Q9GZZ1 | DR | N-terminal protein amino acid acetylation                                                                                                                                                                                               |
| N | Q9GZZ1 | DR | protein binding                                                                                                                                                                                                                         |
| N | Q9H7E2 | CC | Scaffolding protein that specifically recognizes and binds dimethylarginine-containing proteins                                                                                                                                         |
| N | Q9H7E2 | CC | In cytoplasm, may play a role in the assembly and/or disassembly of mRNA stress granules and in the regulation of translation of target mRNAs by binding Arg/Gly-rich motifs (GAR) in dimethylarginine-containing proteins.             |
| N | Q9H7E2 | CC | In nucleus, acts as a coactivator: recognizes and binds asymmetric dimethylation on the core histone tails associated with transcriptional activation (H3R17me2a and H4R3me2a) and recruits proteins at these arginine- methylated loci |
| N | Q9H7E2 | DE | Tudor domain-containing protein 3;                                                                                                                                                                                                      |
| N | Q9H7E2 | DR | chromatin binding                                                                                                                                                                                                                       |
| N | Q9H7E2 | DR | chromatin modification                                                                                                                                                                                                                  |
| N | Q9H7E2 | DR | methylated histone residue binding                                                                                                                                                                                                      |
| N | Q9H7E2 | DR | nucleic acid binding                                                                                                                                                                                                                    |
| N | Q9H7E2 | DR | transcription coactivator activity                                                                                                                                                                                                      |
| N | Q9H7J1 | CC | Acts as a glycogen-targeting subunit for PP1                                                                                                                                                                                            |
| N | Q9H7J1 | CC | PP1 is involved in glycogen metabolism and contributes to the activation of glycogen synthase leading to an increase in glycogen synthesis.                                                                                             |
| N | Q9H7J1 | DE | Protein phosphatase 1 regulatory subunit 3E;                                                                                                                                                                                            |
| N | Q9H7J1 | DR | glycogen metabolic process                                                                                                                                                                                                              |
| N | Q9H814 | CC | A phosphoprotein adapter involved in the XPO1-mediated U snRNA export from the nucleus                                                                                                                                                  |
| N | Q9H814 | CC | Binds also to telomerase RNA.                                                                                                                                                                                                           |
| N | Q9H814 | CC | Binds strongly to m7G-capped U1 and U5 small nuclear RNAs (snRNAs) in a sequence-unspecific manner and phosphorylation- independent manner (By similarity)                                                                              |
| N | Q9H814 | CC | Binds strongly to m7G-capped U3, U8 and U13 precursor snoRNAs and weakly to trimethylated (TMG)-capped U3, U8 and U13 snoRNAs                                                                                                           |
| N | Q9H814 | CC | Bridge components required for U snRNA export, the cap binding complex (CBC)-bound snRNA on the one hand and the GTPase Ran in its active GTP-bound form together with the export receptor XPO1 on the other                            |
| N | Q9H814 | CC | Involved in the U3 snoRNA transport from nucleoplasm to Cajal bodies                                                                                                                                                                    |
| N | Q9H814 | CC | It is recycled back to the nucleus via the importin alpha/beta heterodimeric import receptor                                                                                                                                            |
| N | Q9H814 | CC | Its compartmentalized phosphorylation cycle may also contribute to the directionality of export                                                                                                                                         |
| N | Q9H814 | CC | its phosphorylation in the nucleus is required for U snRNA export complex assembly and export, while its dephosphorylation in the cytoplasm causes export complex disassembly                                                           |
| N | Q9H814 | CC | Plays also a role in the biogenesis of U3 small nucleolar RNA (snoRNA)                                                                                                                                                                  |

|   |        |    |                                                                                                                                                                                             |
|---|--------|----|---------------------------------------------------------------------------------------------------------------------------------------------------------------------------------------------|
| N | Q9H814 | CC | The directionality of nuclear export is thought to be conferred by an asymmetric distribution of the GTP- and GDP-bound forms of Ran between the cytoplasm and nucleus                      |
| N | Q9H814 | DE | Phosphorylated adapter RNA export protein;                                                                                                                                                  |
| N | Q9H814 | DE | RNA U small nuclear RNA export adapter protein;                                                                                                                                             |
| N | Q9H814 | DR | ncRNA metabolic process                                                                                                                                                                     |
| N | Q9H814 | DR | protein transport                                                                                                                                                                           |
| N | Q9H814 | DR | snRNA export from nucleus                                                                                                                                                                   |
| N | Q9H814 | DR | spliceosomal snRNP assembly                                                                                                                                                                 |
| N | Q9H8H3 | CC | Probable methyltransferase (By similarity).                                                                                                                                                 |
| N | Q9H8H3 | DE | Methyltransferase-like protein 7A;                                                                                                                                                          |
| N | Q9H8H3 | DE | Protein AAM-B;                                                                                                                                                                              |
| N | Q9H8H3 | DR | methyltransferase activity                                                                                                                                                                  |
| N | Q9H8Y8 | CC | May be involved in assembly and membrane stacking of the Golgi cisternae, and in the process by which Golgi stacks reform after mitotic breakdown                                           |
| N | Q9H8Y8 | CC | May regulate the intracellular transport and presentation of a defined set of transmembrane proteins, such as transmembrane TGFA.                                                           |
| N | Q9H8Y8 | DE | Golgi phosphoprotein 6;                                                                                                                                                                     |
| N | Q9H8Y8 | DE | Golgi reassembly-stacking protein 2;                                                                                                                                                        |
| N | Q9H8Y8 | DE | Golgi reassembly-stacking protein of 55 kDa;                                                                                                                                                |
| N | Q9H9Y6 | CC | DNA-dependent RNA polymerase catalyzes the transcription of DNA into RNA using the four ribonucleoside triphosphates as substrates                                                          |
| N | Q9H9Y6 | CC | Pol I is composed of mobile elements and RPA2 is part of the core element with the central large cleft and probably a clamp element that moves to open and close the cleft (By similarity). |
| N | Q9H9Y6 | CC | Proposed to contribute to the polymerase catalytic activity and forms the polymerase active center together with the largest subunit                                                        |
| N | Q9H9Y6 | CC | Second largest core component of RNA polymerase I which synthesizes ribosomal RNA precursors                                                                                                |
| N | Q9H9Y6 | DE | DNA-directed RNA polymerase I 135 kDa polypeptide;                                                                                                                                          |
| N | Q9H9Y6 | DE | DNA-directed RNA polymerase I subunit RPA2;                                                                                                                                                 |
| N | Q9H9Y6 | DE | RNA polymerase I subunit 2;                                                                                                                                                                 |
| N | Q9H9Y6 | DR | DNA-directed RNA polymerase activity                                                                                                                                                        |
| N | Q9H9Y6 | DR | metal ion binding                                                                                                                                                                           |
| N | Q9H9Y6 | DR | protein binding                                                                                                                                                                             |
| N | Q9H9Y6 | DR | ribonucleoside binding                                                                                                                                                                      |
| N | Q9H9Y6 | DR | termination of RNA polymerase I transcription                                                                                                                                               |
| N | Q9H9Y6 | DR | transcription elongation from RNA polymerase I promoter                                                                                                                                     |
| N | Q9H9Y6 | DR | transcription initiation from RNA polymerase I promoter                                                                                                                                     |
| N | Q9HBV2 | CC | May be involved in sperm-egg fusion.                                                                                                                                                        |
| N | Q9HBV2 | DE | Sperm acrosomal membrane-associated protein 32;                                                                                                                                             |
| N | Q9HBV2 | DE | Sperm acrosome membrane-associated protein 1;                                                                                                                                               |
| N | Q9HC24 | DE | Protein SIR;                                                                                                                                                                                |
| N | Q9HC24 | DE | Transmembrane BAX inhibitor motif-containing protein 4;                                                                                                                                     |
| N | Q9HC24 | DR | protein binding                                                                                                                                                                             |
| N | Q9HCM1 | DE | Uncharacterized protein C12orf35;                                                                                                                                                           |
| N | Q9HDU6 | CC | Catalyzes the NADPH-dependent reduction of ketopantoate into pantoic acid (By similarity).                                                                                                  |
| N | Q9HDU6 | DE | KPA reductase;                                                                                                                                                                              |
| N | Q9HDU6 | DE | Ketopantoate reductase;                                                                                                                                                                     |
| N | Q9HDU6 | DE | Probable 2-dehydropantoate 2-reductase;                                                                                                                                                     |
| N | Q9HDU6 | DR | 2-dehydropantoate 2-reductase activity                                                                                                                                                      |
| N | Q9HDU6 | DR | oxidation-reduction process                                                                                                                                                                 |
| N | Q9HDU6 | DR | pantothenate biosynthetic process                                                                                                                                                           |
| N | Q9HDU6 | DR | pyrimidine nucleotide biosynthetic process                                                                                                                                                  |
| N | Q9HDX6 | DE | Uncharacterized protein PB1A10.14;                                                                                                                                                          |
| N | Q9HE05 | CC | E4 ubiquitin chain-elongation enzyme specifically involved in polyubiquitin chain assembly.                                                                                                 |
| N | Q9HE05 | CC | Binds to cdc48 and elongates mono- and diubiquitinated ERAD substrates presented by the ufd1-npl4-cdc48 (UNC) AAA ATPase complex to a chain length of 4 to 6 ubiquitin moieties             |
| N | Q9HE05 | CC | Delivers these polyubiquitinated substrates to downstream ERAD components, which target them to the proteasome                                                                              |
| N | Q9HE05 | CC | Enhances ubiquitination at Lys-48, but not at Lys-29 of the Ub moiety (By similarity)                                                                                                       |
| N | Q9HE05 | DE | UB fusion protein 2;                                                                                                                                                                        |
| N | Q9HE05 | DE | Ubiquitin conjugation factor E4;                                                                                                                                                            |

|   |        |    |                                                                                                                                                                                                                              |
|---|--------|----|------------------------------------------------------------------------------------------------------------------------------------------------------------------------------------------------------------------------------|
| N | Q9HE05 | DE | Ubiquitin fusion degradation protein 2;                                                                                                                                                                                      |
| N | Q9HE05 | DR | ubiquitin-dependent protein catabolic process                                                                                                                                                                                |
| N | Q9HE05 | DR | ubiquitin-ubiquitin ligase activity                                                                                                                                                                                          |
| N | Q9HH82 | DE | 50S ribosomal protein L32e;                                                                                                                                                                                                  |
| N | Q9HH82 | DR | structural constituent of ribosome                                                                                                                                                                                           |
| N | Q9HIY5 | CC | Endonuclease that removes tRNA introns                                                                                                                                                                                       |
| N | Q9HIY5 | CC | Cleaves pre-tRNA at the 5'- and 3'-splice sites to release the intron                                                                                                                                                        |
| N | Q9HIY5 | CC | Recognizes a pseudosymmetric substrate in which 2 bulged loops of 3 bases are separated by a stem of 4 bp (By similarity).                                                                                                   |
| N | Q9HIY5 | CC | The products are an intron and two tRNA half-molecules bearing 2',3' cyclic phosphate and 5'-OH termini                                                                                                                      |
| N | Q9HIY5 | DE | tRNA-intron endonuclease;                                                                                                                                                                                                    |
| N | Q9HIY5 | DE | tRNA-splicing endonuclease;                                                                                                                                                                                                  |
| N | Q9HIY5 | DR | nucleic acid binding                                                                                                                                                                                                         |
| N | Q9HIY5 | DR | tRNA splicing, via endonucleolytic cleavage and ligation                                                                                                                                                                     |
| N | Q9HIY5 | DR | tRNA-intron endonuclease activity                                                                                                                                                                                            |
| N | Q9HLR8 | CC | Involved in DNA double-strand break repair (DSBR)                                                                                                                                                                            |
| N | Q9HLR8 | CC | Rad50 provides an ATP-dependent control of mre11 by unwinding and/or repositioning DNA ends into the mre11 active site (By similarity).                                                                                      |
| N | Q9HLR8 | CC | The rad50/mre11 complex possesses single-strand endonuclease activity and ATP-dependent double-strand-specific 3'-5' exonuclease activity                                                                                    |
| N | Q9HLR8 | DE | DNA double-strand break repair rad50 ATPase;                                                                                                                                                                                 |
| N | Q9HLR8 | DR | nuclease activity                                                                                                                                                                                                            |
| N | Q9HLR8 | DR | zinc ion binding                                                                                                                                                                                                             |
| N | Q9HPG3 | DE | Anthranilate phosphoribosyltransferase;                                                                                                                                                                                      |
| N | Q9HPG3 | DR | anthranilate phosphoribosyltransferase activity                                                                                                                                                                              |
| N | Q9HPG3 | DR | tryptophan biosynthetic process                                                                                                                                                                                              |
| N | Q9HQ95 | DE | UPF0212 protein VNG_1264C;                                                                                                                                                                                                   |
| N | Q9HRI2 | DE | Uncharacterized aldolase VNG_0683C;                                                                                                                                                                                          |
| N | Q9HRI2 | DR | lyase activity                                                                                                                                                                                                               |
| N | Q9HS70 | CC | Hydrolyzes D-tyrosyl-tRNA(Tyr) into D-tyrosine and free tRNA(Tyr) (By similarity)                                                                                                                                            |
| N | Q9HS70 | DE | D-tyrosyl-tRNA(Tyr) deacylase;                                                                                                                                                                                               |
| N | Q9HS70 | DR | hydrolase activity, acting on ester bonds                                                                                                                                                                                    |
| N | Q9HS70 | DR | metal ion binding                                                                                                                                                                                                            |
| N | Q9HSC0 | CC | The beta subunit is responsible for the synthesis of L- tryptophan from indole and L-serine.                                                                                                                                 |
| N | Q9HSC0 | DE | Tryptophan synthase beta chain;                                                                                                                                                                                              |
| N | Q9HSC0 | DR | pyridoxal phosphate binding                                                                                                                                                                                                  |
| N | Q9HSC0 | DR | tryptophan synthase activity                                                                                                                                                                                                 |
| N | Q9HV61 | DE | UPF0337 protein PA4738;                                                                                                                                                                                                      |
| N | Q9I190 | CC | Part of the ABC transporter complex MacAB involved in macrolide export                                                                                                                                                       |
| N | Q9I190 | CC | Transmembrane domains (TMD) form a pore in the inner membrane and the ATP-binding domain (NBD) is responsible for energy generation (By similarity).                                                                         |
| N | Q9I190 | DE | Macrolide export ATP-binding/permease protein MacB;                                                                                                                                                                          |
| N | Q9I190 | DR | ATPase activity                                                                                                                                                                                                              |
| N | Q9I190 | DR | hydrolase activity, acting on acid anhydrides, catalyzing transmembrane movement of substances                                                                                                                               |
| N | Q9I190 | DR | response to antibiotic                                                                                                                                                                                                       |
| N | Q9I2W4 | CC | Catalyzes both methylations at C-2 and C-7 of uroporphyrinogen III leading to precorrin-1 and precorrin-2; their oxidative esterification gives respectively factor I octamethyl ester and sirohydrochlorin (By similarity). |
| N | Q9I2W4 | DE | Urogen III methylase;                                                                                                                                                                                                        |
| N | Q9I2W4 | DE | Uroporphyrinogen III methylase;                                                                                                                                                                                              |
| N | Q9I2W4 | DE | Uroporphyrinogen-III C-methyltransferase;                                                                                                                                                                                    |
| N | Q9I2W4 | DR | cobalamin biosynthetic process                                                                                                                                                                                               |
| N | Q9I2W4 | DR | oxidation-reduction process                                                                                                                                                                                                  |
| N | Q9I2W4 | DR | uroporphyrin-III C-methyltransferase activity                                                                                                                                                                                |
| N | Q9I3H9 | CC | May play a role in DNA repair                                                                                                                                                                                                |
| N | Q9I3H9 | CC | It may act with recF and recO (By similarity).                                                                                                                                                                               |
| N | Q9I3H9 | CC | It seems to be involved in an recBC-independent recombinational process of DNA repair                                                                                                                                        |
| N | Q9I3H9 | DE | Recombination protein recR;                                                                                                                                                                                                  |
| N | Q9I3H9 | DR | DNA recombination                                                                                                                                                                                                            |
| N | Q9I3H9 | DR | metal ion binding                                                                                                                                                                                                            |
| N | Q9I869 | CC | Kinesin family member that is involved in spindle formation and the movements of chromosomes during mitosis and meiosis                                                                                                      |

|   |        |    |                                                                                                                                                                                                                                                                                                                                      |
|---|--------|----|--------------------------------------------------------------------------------------------------------------------------------------------------------------------------------------------------------------------------------------------------------------------------------------------------------------------------------------|
| N | Q9I869 | CC | Binds to microtubules and to DNA.                                                                                                                                                                                                                                                                                                    |
| N | Q9I869 | DE | Chromokinesin kid-A;                                                                                                                                                                                                                                                                                                                 |
| N | Q9I869 | DE | Kinesin-like protein KIF22-A;                                                                                                                                                                                                                                                                                                        |
| N | Q9I869 | DR | microtubule motor activity                                                                                                                                                                                                                                                                                                           |
| N | Q9I869 | DR | microtubule-based movement                                                                                                                                                                                                                                                                                                           |
| N | Q9I8D8 | CC | Cytokine that binds to TNFRSF5                                                                                                                                                                                                                                                                                                       |
| N | Q9I8D8 | CC | Involved in immunoglobulin class switching (By similarity).                                                                                                                                                                                                                                                                          |
| N | Q9I8D8 | CC | Mediates B-cell proliferation in the absence of co-stimulus as well as IgE production in the presence of IL-4                                                                                                                                                                                                                        |
| N | Q9I8D8 | DE | CD40 ligand, membrane form;                                                                                                                                                                                                                                                                                                          |
| N | Q9I8D8 | DE | CD40 ligand, soluble form;                                                                                                                                                                                                                                                                                                           |
| N | Q9I8D8 | DE | CD40 ligand;                                                                                                                                                                                                                                                                                                                         |
| N | Q9I8D8 | DE | Tumor necrosis factor ligand superfamily member 5;                                                                                                                                                                                                                                                                                   |
| N | Q9I8D8 | DR | B cell proliferation                                                                                                                                                                                                                                                                                                                 |
| N | Q9I8D8 | DR | CD40 receptor binding                                                                                                                                                                                                                                                                                                                |
| N | Q9I8D8 | DR | cytokine activity                                                                                                                                                                                                                                                                                                                    |
| N | Q9I8D8 | DR | inflammatory response                                                                                                                                                                                                                                                                                                                |
| N | Q9I8D8 | DR | platelet activation                                                                                                                                                                                                                                                                                                                  |
| N | Q9I8D8 | DR | tumor necrosis factor receptor binding                                                                                                                                                                                                                                                                                               |
| N | Q9JHA8 | DE | Protein G7c;                                                                                                                                                                                                                                                                                                                         |
| N | Q9JII2 | DE | PRL-like protein L;                                                                                                                                                                                                                                                                                                                  |
| N | Q9JII2 | DE | Placental prolactin-like protein L;                                                                                                                                                                                                                                                                                                  |
| N | Q9JII2 | DE | Prolactin-5A1;                                                                                                                                                                                                                                                                                                                       |
| N | Q9JII2 | DR | hormone activity                                                                                                                                                                                                                                                                                                                     |
| N | Q9JJJ7 | CC | Modulates the processing of Wnt proteins                                                                                                                                                                                                                                                                                             |
| N | Q9JJJ7 | CC | Probable protein-cysteine N-palmitoyltransferase that palmitoylates wnt family members                                                                                                                                                                                                                                               |
| N | Q9JJJ7 | DE | Probable protein-cysteine N-palmitoyltransferase porcupine;                                                                                                                                                                                                                                                                          |
| N | Q9JJJ7 | DR | Wnt receptor signaling pathway                                                                                                                                                                                                                                                                                                       |
| N | Q9JJJ7 | DR | acyltransferase activity                                                                                                                                                                                                                                                                                                             |
| N | Q9JJJ7 | DR | glycoprotein metabolic process                                                                                                                                                                                                                                                                                                       |
| N | Q9JJJ7 | DR | protein binding                                                                                                                                                                                                                                                                                                                      |
| N | Q9JLB5 | CC | Ionotropic receptor with a probable role in the modulation of auditory stimuli<br>Agonist binding may induce an extensive change in conformation that affects all subunits and leads to opening of an ion-conducting channel across the plasma membrane                                                                              |
| N | Q9JLB5 | CC | In the ear, this leads to a reduction in basilar membrane motion, altering the activity of auditory nerve fibers and reducing the range of dynamic hearing<br>The channel is permeable to a range of divalent cations including calcium, the influx of which may activate a potassium current which hyperpolarizes the cell membrane |
| N | Q9JLB5 | CC | This may protect against acoustic trauma.                                                                                                                                                                                                                                                                                            |
| N | Q9JLB5 | DE | NACHR alpha-10;                                                                                                                                                                                                                                                                                                                      |
| N | Q9JLB5 | DE | Neuronal acetylcholine receptor subunit alpha-10;                                                                                                                                                                                                                                                                                    |
| N | Q9JLB5 | DE | Nicotinic acetylcholine receptor subunit alpha-10;                                                                                                                                                                                                                                                                                   |
| N | Q9JLB5 | DR | calcium channel activity                                                                                                                                                                                                                                                                                                             |
| N | Q9JLB5 | DR | receptor activity                                                                                                                                                                                                                                                                                                                    |
| N | Q9JLB5 | DR | synaptic transmission, cholinergic                                                                                                                                                                                                                                                                                                   |
| N | Q9JLC4 | DE | VPS10 domain-containing receptor SorCS1;                                                                                                                                                                                                                                                                                             |
| N | Q9JLR9 | DE | HIG1 domain family member 1A;                                                                                                                                                                                                                                                                                                        |
| N | Q9JLR9 | DE | Hypoxia-inducible gene 1 protein;                                                                                                                                                                                                                                                                                                    |
| N | Q9JLR9 | DR | response to stress                                                                                                                                                                                                                                                                                                                   |
| N | Q9JU12 | DE | UPF0301 protein NMA1550;                                                                                                                                                                                                                                                                                                             |
| N | Q9JUE9 | CC | Ligates lysine onto the cytidine present at position 34 of the AUA codon-specific tRNA(Ile) that contains the anticodon CAU, in an ATP-dependent manner                                                                                                                                                                              |
| N | Q9JUE9 | CC | Cytidine is converted to lysidine, thus changing the amino acid specificity of the tRNA from methionine to isoleucine (By similarity).                                                                                                                                                                                               |
| N | Q9JUE9 | DE | tRNA(Ile)-2-lysyl-cytidine synthase;                                                                                                                                                                                                                                                                                                 |
| N | Q9JUE9 | DE | tRNA(Ile)-lysidine synthase;                                                                                                                                                                                                                                                                                                         |
| N | Q9JUE9 | DE | tRNA(Ile)-lysidine synthetase;                                                                                                                                                                                                                                                                                                       |
| N | Q9JUE9 | DR | ligase activity, forming carbon-nitrogen bonds                                                                                                                                                                                                                                                                                       |
| N | Q9JUE9 | DR | tRNA processing                                                                                                                                                                                                                                                                                                                      |
| N | Q9JVT3 | CC | Cleaves GlcNAc linked beta-1,4 to MurNAc tripeptides (By similarity).                                                                                                                                                                                                                                                                |
| N | Q9JVT3 | DE | Beta-N-acetylhexosaminidase;                                                                                                                                                                                                                                                                                                         |
| N | Q9JVT3 | DE | Beta-hexosaminidase;                                                                                                                                                                                                                                                                                                                 |
| N | Q9JVT3 | DE | N-acetyl-beta-glucosaminidase;                                                                                                                                                                                                                                                                                                       |
| N | Q9JVT3 | DR | beta-N-acetylhexosaminidase activity                                                                                                                                                                                                                                                                                                 |
| N | Q9JVT3 | DR | cell division                                                                                                                                                                                                                                                                                                                        |

|   |        |    |                                                                                                                                                                                                                                                           |
|---|--------|----|-----------------------------------------------------------------------------------------------------------------------------------------------------------------------------------------------------------------------------------------------------------|
| N | Q9JVT3 | DR | cellular cell wall organization                                                                                                                                                                                                                           |
| N | Q9JVT3 | DR | peptidoglycan biosynthetic process                                                                                                                                                                                                                        |
| N | Q9JVT3 | DR | regulation of cell shape                                                                                                                                                                                                                                  |
| N | Q9JWS8 | DE | Phosphoglycerate kinase;                                                                                                                                                                                                                                  |
| N | Q9JWS8 | DR | phosphoglycerate kinase activity                                                                                                                                                                                                                          |
| N | Q9JXF7 | CC | Condenses 4-methyl-5-(beta-hydroxyethyl)thiazole monophosphate (THZ-P) and 2-methyl-4-amino-5-hydroxymethyl pyrimidine pyrophosphate (HMP-PP) to form thiamine monophosphate (TMP) (By similarity).                                                       |
| N | Q9JXF7 | DE | TMP pyrophosphorylase;                                                                                                                                                                                                                                    |
| N | Q9JXF7 | DE | Thiamine-phosphate pyrophosphorylase;                                                                                                                                                                                                                     |
| N | Q9JXF7 | DE | Thiamine-phosphate synthase;                                                                                                                                                                                                                              |
| N | Q9JXF7 | DR | metal ion binding                                                                                                                                                                                                                                         |
| N | Q9JXF7 | DR | thiamine biosynthetic process                                                                                                                                                                                                                             |
| N | Q9JXF7 | DR | thiamine-phosphate diphosphorylase activity                                                                                                                                                                                                               |
| N | Q9JXQ5 | DE | Glycine--tRNA ligase beta subunit;                                                                                                                                                                                                                        |
| N | Q9JXQ5 | DE | Glycyl-tRNA synthetase beta subunit;                                                                                                                                                                                                                      |
| N | Q9JXQ5 | DR | arginine-tRNA ligase activity                                                                                                                                                                                                                             |
| N | Q9JXQ5 | DR | arginyl-tRNA aminoacylation                                                                                                                                                                                                                               |
| N | Q9JXQ5 | DR | glycine-tRNA ligase activity                                                                                                                                                                                                                              |
| N | Q9JXQ5 | DR | glycyl-tRNA aminoacylation                                                                                                                                                                                                                                |
| N | Q9JXS6 | CC | RNaseP catalyzes the removal of the 5'-leader sequence from pre-tRNA to produce the mature 5'-terminus                                                                                                                                                    |
| N | Q9JXS6 | CC | It can also cleave other RNA substrates such as 4.5S RNA                                                                                                                                                                                                  |
| N | Q9JXS6 | CC | The protein component plays an auxiliary but essential role in vivo by binding to the 5'-leader sequence and broadening the substrate specificity of the ribozyme (By similarity)                                                                         |
| N | Q9JXS6 | DE | RNase P protein;                                                                                                                                                                                                                                          |
| N | Q9JXS6 | DE | RNaseP protein;                                                                                                                                                                                                                                           |
| N | Q9JXS6 | DE | Ribonuclease P protein component;                                                                                                                                                                                                                         |
| N | Q9JXS6 | DR | ribonuclease P activity                                                                                                                                                                                                                                   |
| N | Q9JXS6 | DR | tRNA processing                                                                                                                                                                                                                                           |
| N | Q9JYV1 | CC | Nuclease that resolves Holliday junction intermediates in genetic recombination                                                                                                                                                                           |
| N | Q9JYV1 | CC | Cleaves the cruciform structure in supercoiled DNA by nicking to strands with the same polarity at sites symmetrically opposed at the junction in the homologous arms and leaves a 5'-terminal phosphate and a 3'-terminal hydroxyl group (By similarity) |
| N | Q9JYV1 | DE | Crossover junction endodeoxyribonuclease ruvC;                                                                                                                                                                                                            |
| N | Q9JYV1 | DE | Holliday junction nuclease ruvC;                                                                                                                                                                                                                          |
| N | Q9JYV1 | DE | Holliday junction resolvase ruvC;                                                                                                                                                                                                                         |
| N | Q9JYV1 | DR | DNA recombination                                                                                                                                                                                                                                         |
| N | Q9JYV1 | DR | crossover junction endodeoxyribonuclease activity                                                                                                                                                                                                         |
| N | Q9JYV1 | DR | metal ion binding                                                                                                                                                                                                                                         |
| N | Q9JYV1 | DR | nucleic acid binding                                                                                                                                                                                                                                      |
| N | Q9K0C7 | CC | An essential GTPase that binds both GDP and GTP, with rapid nucleotide exchange                                                                                                                                                                           |
| N | Q9K0C7 | CC | Plays a role in 16S rRNA processing and 30S ribosomal subunit biogenesis and possibly also in cell cycle regulation and energy metabolism (By similarity).                                                                                                |
| N | Q9K0C7 | DR | ribosome biogenesis                                                                                                                                                                                                                                       |
| N | Q9K6H2 | CC | F(1)F(0) ATP synthase produces ATP from ADP in the presence of a proton or sodium gradient                                                                                                                                                                |
| N | Q9K6H2 | CC | During catalysis, ATP synthesis in the catalytic domain of F(1) is coupled via a rotary mechanism of the central stalk subunits to proton translocation (By similarity)                                                                                   |
| N | Q9K6H2 | CC | F-type ATPases consist of two structural domains, F(1) containing the extramembraneous catalytic core and F(0) containing the membrane proton channel, linked together by a central stalk and a peripheral stalk                                          |
| N | Q9K6H2 | DE | ATP synthase F(1) sector subunit delta;                                                                                                                                                                                                                   |
| N | Q9K6H2 | DE | ATP synthase subunit delta;                                                                                                                                                                                                                               |
| N | Q9K6H2 | DE | F-ATPase subunit delta;                                                                                                                                                                                                                                   |
| N | Q9K6H2 | DE | F-type ATPase subunit delta;                                                                                                                                                                                                                              |
| N | Q9K6H2 | DR | ATP synthesis coupled proton transport                                                                                                                                                                                                                    |
| N | Q9K6H2 | DR | hydrogen ion transporting ATP synthase activity, rotational mechanism                                                                                                                                                                                     |
| N | Q9K846 | DE | UPF0756 membrane protein BH3161;                                                                                                                                                                                                                          |
| N | Q9K8E9 | CC | Catalyzes the oxidation of 3-carboxy-2-hydroxy-4- methylpentanoate (3-isopropylmalate) to 3-carboxy-4-methyl-2- oxopentanoate                                                                                                                             |
| N | Q9K8E9 | CC | The product decarboxylates to 4-methyl-2 oxopentanoate.                                                                                                                                                                                                   |
| N | Q9K8E9 | DE | 3-isopropylmalate dehydrogenase;                                                                                                                                                                                                                          |
| N | Q9K8E9 | DE | Beta-IPM dehydrogenase;                                                                                                                                                                                                                                   |
| N | Q9K8E9 | DR | 3-isopropylmalate dehydrogenase activity                                                                                                                                                                                                                  |

|   |        |    |                                                                                                                                                                                                                              |
|---|--------|----|------------------------------------------------------------------------------------------------------------------------------------------------------------------------------------------------------------------------------|
| N | Q9K8E9 | DR | leucine biosynthetic process                                                                                                                                                                                                 |
| N | Q9K8E9 | DR | magnesium ion binding                                                                                                                                                                                                        |
| N | Q9K8E9 | DR | oxidation-reduction process                                                                                                                                                                                                  |
| N | Q9K974 | CC | May be involved in recombinational repair of damaged DNA (By similarity).                                                                                                                                                    |
| N | Q9K974 | DE | DNA repair protein recN;                                                                                                                                                                                                     |
| N | Q9K974 | DE | Recombination protein N;                                                                                                                                                                                                     |
| N | Q9K974 | DR | DNA recombination                                                                                                                                                                                                            |
| N | Q9KDP2 | CC | Required for the insertion of integral membrane proteins into the membrane                                                                                                                                                   |
| N | Q9KDP2 | CC | May also be involved in protein secretion processes (By similarity).                                                                                                                                                         |
| N | Q9KDP2 | DE | Membrane protein oxaA 2;                                                                                                                                                                                                     |
| N | Q9KDP2 | DR | protein insertion into membrane                                                                                                                                                                                              |
| N | Q9KET5 | CC | Catalyzes the condensation reaction of fatty acid synthesis by the addition to an acyl acceptor of two carbons from malonyl-ACP                                                                                              |
| N | Q9KET5 | CC | Catalyzes the first condensation reaction which initiates fatty acid synthesis and may therefore play a role in governing the total rate of fatty acid production                                                            |
| N | Q9KET5 | CC | Its substrate specificity determines the biosynthesis of branched- chain and/or straight-chain of fatty acids (By similarity).                                                                                               |
| N | Q9KET5 | CC | Possesses both acetoacetyl-ACP synthase and acetyl transacylase activities                                                                                                                                                   |
| N | Q9KET5 | DE | 3-oxoacyl-[acyl-carrier-protein] synthase 3 protein 2;                                                                                                                                                                       |
| N | Q9KET5 | DE | 3-oxoacyl-[acyl-carrier-protein] synthase III protein 2;                                                                                                                                                                     |
| N | Q9KET5 | DE | Beta-ketoacyl-ACP synthase III 2;                                                                                                                                                                                            |
| N | Q9KET5 | DR | 3-oxoacyl-[acyl-carrier-protein] synthase activity                                                                                                                                                                           |
| N | Q9KET5 | DR | beta-ketoacyl-acyl-carrier-protein synthase III activity                                                                                                                                                                     |
| N | Q9KET5 | DR | fatty acid biosynthetic process                                                                                                                                                                                              |
| N | Q9KGG0 | CC | Participates in a DNA-damage check-point that is active prior to asymmetric division when DNA is damaged                                                                                                                     |
| N | Q9KGG0 | CC | DisA forms globular foci that rapidly scan along the chromosomes during sporulation, searching for lesions                                                                                                                   |
| N | Q9KGG0 | CC | This triggers a cellular response that culminates in a temporary block in sporulation initiation (By similarity).                                                                                                            |
| N | Q9KGG0 | CC | When a lesion is present, disA pauses at the lesion site                                                                                                                                                                     |
| N | Q9KGG0 | DE | DNA integrity scanning protein disA;                                                                                                                                                                                         |
| N | Q9KI14 | CC | Binds to type I collagen via alpha-2(I) or alpha-1(I) chains, although its affinity for the alpha-1(I) chain is significantly higher                                                                                         |
| N | Q9KI14 | CC | Involved in bacterial adherence to transcutaneous drivelines from explanted ventricular assist devices.                                                                                                                      |
| N | Q9KI14 | DE | Serine-aspartate repeat-containing protein F;                                                                                                                                                                                |
| N | Q9KI14 | DR | cell adhesion                                                                                                                                                                                                                |
| N | Q9KMA6 | CC | Toxic component of a toxin-antitoxin (TA) module                                                                                                                                                                             |
| N | Q9KMA6 | CC | Inhibits translation by cleavage of mRNA.                                                                                                                                                                                    |
| N | Q9KMA6 | DE | Toxin higB-2;                                                                                                                                                                                                                |
| N | Q9KNA8 | CC | Involved in repair of UV radiation-induced DNA damage                                                                                                                                                                        |
| N | Q9KNA8 | CC | Catalyzes the light-dependent monomerization (300-600 nm) of cyclobutyl pyrimidine dimers (in cis-syn configuration), which are formed between adjacent bases on the same DNA strand upon exposure to ultraviolet radiation. |
| N | Q9KNA8 | DE | DNA photolyase;                                                                                                                                                                                                              |
| N | Q9KNA8 | DE | Deoxyribodipyrimidine photo-lyase;                                                                                                                                                                                           |
| N | Q9KNA8 | DE | Photoreactivating enzyme;                                                                                                                                                                                                    |
| N | Q9KNA8 | DR | deoxyribodipyrimidine photo-lyase activity                                                                                                                                                                                   |
| N | Q9KNA8 | DR | protein-chromophore linkage                                                                                                                                                                                                  |
| N | Q9KRA6 | CC | May conjugate Arg from its aminoacyl-tRNA to the N- termini of proteins containing an N-terminal aspartate or glutamate (Potential).                                                                                         |
| N | Q9KRA6 | DE | Arginyltransferase;                                                                                                                                                                                                          |
| N | Q9KRA6 | DE | Putative arginyl-tRNA--protein transferase;                                                                                                                                                                                  |
| N | Q9KRA6 | DE | R-transferase;                                                                                                                                                                                                               |
| N | Q9KRA6 | DR | acyltransferase activity                                                                                                                                                                                                     |
| N | Q9KRA6 | DR | arginyltransferase activity                                                                                                                                                                                                  |
| N | Q9KRA6 | DR | protein arginylation                                                                                                                                                                                                         |
| N | Q9KTX8 | CC | Probable chaperone                                                                                                                                                                                                           |
| N | Q9KTX8 | CC | has a low intrinsic ATPase activity which is markedly stimulated by hscB (By similarity)                                                                                                                                     |
| N | Q9KTX8 | DE | Chaperone protein hscA homolog;                                                                                                                                                                                              |
| N | Q9KTX8 | DR | ATPase activity                                                                                                                                                                                                              |
| N | Q9KTX8 | DR | iron-sulfur cluster assembly                                                                                                                                                                                                 |
| N | Q9KTX8 | DR | protein folding                                                                                                                                                                                                              |
| N | Q9KTX8 | DR | unfolded protein binding                                                                                                                                                                                                     |

|   |        |    |                                                                                                                                                                                                                                          |
|---|--------|----|------------------------------------------------------------------------------------------------------------------------------------------------------------------------------------------------------------------------------------------|
| N | Q9KVD1 | CC | Catalyzes two steps in the biosynthesis of coenzyme A                                                                                                                                                                                    |
| N | Q9KVD1 | CC | In the first step cysteine is conjugated to 4'-phosphopantothenate to form 4-phosphopantothenoylcysteine, in the latter compound is decarboxylated to form 4'-phosphopantotheine (By similarity).                                        |
| N | Q9KVD1 | DE | Coenzyme A biosynthesis bifunctional protein CoaBC;                                                                                                                                                                                      |
| N | Q9KVD1 | DE | DNA/pantothenate metabolism flavoprotein;                                                                                                                                                                                                |
| N | Q9KVD1 | DE | PPC synthetase;                                                                                                                                                                                                                          |
| N | Q9KVD1 | DE | Phosphopantothenate--cysteine ligase;                                                                                                                                                                                                    |
| N | Q9KVD1 | DE | Phosphopantothenoylcysteine decarboxylase;                                                                                                                                                                                               |
| N | Q9KVD1 | DE | Phosphopantothenoylcysteine synthase;                                                                                                                                                                                                    |
| N | Q9KVD1 | DR | coenzyme A biosynthetic process                                                                                                                                                                                                          |
| N | Q9KVD1 | DR | metal ion binding                                                                                                                                                                                                                        |
| N | Q9KVD1 | DR | pantothenate catabolic process                                                                                                                                                                                                           |
| N | Q9KVD1 | DR | phosphopantothenate--cysteine ligase activity                                                                                                                                                                                            |
| N | Q9KVD1 | DR | phosphopantothenoylcysteine decarboxylase activity                                                                                                                                                                                       |
| N | Q9KWZ4 | CC | Catalyzes the formation of N(7)-methylguanine at position 46 (m7G46) in tRNA (By similarity).                                                                                                                                            |
| N | Q9KWZ4 | DE | tRNA (guanine-N(7))-methyltransferase;                                                                                                                                                                                                   |
| N | Q9KWZ4 | DE | tRNA(m7G46)-methyltransferase;                                                                                                                                                                                                           |
| N | Q9KWZ4 | DR | tRNA (guanine-N7-)-methyltransferase activity                                                                                                                                                                                            |
| N | Q9L0Q7 | CC | Converts 4-diphosphocytidyl-2-C-methyl-D-erythritol 2- phosphate into 2-C-methyl-D-erythritol 2,4-cyclodiphosphate (MECDP) and CMP (By similarity).                                                                                      |
| N | Q9L0Q7 | DE | 2-C-methyl-D-erythritol 2,4-cyclodiphosphate synthase;                                                                                                                                                                                   |
| N | Q9L0Q7 | DE | MECDP-synthase;                                                                                                                                                                                                                          |
| N | Q9L0Q7 | DR | 2-C-methyl-D-erythritol 2,4-cyclodiphosphate synthase activity                                                                                                                                                                           |
| N | Q9L0Q7 | DR | metal ion binding                                                                                                                                                                                                                        |
| N | Q9L0Q7 | DR | terpenoid biosynthetic process                                                                                                                                                                                                           |
| N | Q9L6M9 | DE | Dienelactone hydrolase;                                                                                                                                                                                                                  |
| N | Q9L6M9 | DE | Putative carboxymethylenebutenolidase;                                                                                                                                                                                                   |
| N | Q9L6M9 | DR | carboxymethylenebutenolidase activity                                                                                                                                                                                                    |
| N | Q9L8R8 | CC | Hydrolyzes acyl homoserine lactones with varying lengths of acyl chains, with a slight preference for substrates without 3- oxo substitution at the C3 position                                                                          |
| N | Q9L8R8 | CC | Has only residual activity towards non-acyl lactones, and no activity towards non-cyclic esters.                                                                                                                                         |
| N | Q9L8R8 | DE | AHL-lactonase;                                                                                                                                                                                                                           |
| N | Q9L8R8 | DE | Acyl-homoserine lactonase;                                                                                                                                                                                                               |
| N | Q9L8R8 | DE | N-acyl homoserine lactonase;                                                                                                                                                                                                             |
| N | Q9L8R8 | DR | hydrolase activity                                                                                                                                                                                                                       |
| N | Q9L8R8 | DR | metal ion binding                                                                                                                                                                                                                        |
| N | Q9LCK1 | CC | DNA gyrase negatively supercoils closed circular double- stranded DNA in an ATP-dependent manner and also catalyzes the interconversion of other topological isomers of double-stranded DNA rings, including catenanes and knotted rings |
| N | Q9LCK1 | DE | DNA gyrase subunit B;                                                                                                                                                                                                                    |
| N | Q9LCK1 | DR | DNA topoisomerase (ATP-hydrolyzing) activity                                                                                                                                                                                             |
| N | Q9LCK1 | DR | DNA topological change                                                                                                                                                                                                                   |
| N | Q9LDE3 | DE | F-box/kelch-repeat protein At1g23390;                                                                                                                                                                                                    |
| N | Q9LDY5 | CC | PPIases accelerate the folding of proteins                                                                                                                                                                                               |
| N | Q9LDY5 | CC | It catalyzes the cis-trans isomerization of proline imidic peptide bonds in oligopeptides (By similarity).                                                                                                                               |
| N | Q9LDY5 | DE | Probable FKBP-type peptidyl-prolyl cis-trans isomerase 5, chloroplastic;                                                                                                                                                                 |
| N | Q9LDY5 | DR | peptidyl-prolyl cis-trans isomerase activity                                                                                                                                                                                             |
| N | Q9LDY5 | DR | protein folding                                                                                                                                                                                                                          |
| N | Q9LEQ3 | CC | Putative cyclic nucleotide-gated ion channel.                                                                                                                                                                                            |
| N | Q9LEQ3 | DE | Cyclic nucleotide- and calmodulin-regulated ion channel 18;                                                                                                                                                                              |
| N | Q9LEQ3 | DE | Putative cyclic nucleotide-gated ion channel 18;                                                                                                                                                                                         |
| N | Q9LEQ3 | DR | calmodulin binding                                                                                                                                                                                                                       |
| N | Q9LEQ3 | DR | cellular calcium ion homeostasis                                                                                                                                                                                                         |
| N | Q9LEQ3 | DR | ion channel activity                                                                                                                                                                                                                     |
| N | Q9LEQ3 | DR | pollen tube growth                                                                                                                                                                                                                       |
| N | Q9LFT5 | CC | Controls stomatal patterning (By similarity).                                                                                                                                                                                            |
| N | Q9LFT5 | DE | EPF-like protein 1;                                                                                                                                                                                                                      |
| N | Q9LFT5 | DE | EPIDERMAL PATTERNING FACTOR-like protein 1;                                                                                                                                                                                              |
| N | Q9LFT5 | DR | guard cell differentiation                                                                                                                                                                                                               |
| N | Q9LHJ9 | DE | Probable protein phosphatase 2C 38;                                                                                                                                                                                                      |
| N | Q9LHJ9 | DR | metal ion binding                                                                                                                                                                                                                        |

|   |        |    |                                                                                                                                                                                                     |
|---|--------|----|-----------------------------------------------------------------------------------------------------------------------------------------------------------------------------------------------------|
| N | Q9LHJ9 | DR | protein dephosphorylation                                                                                                                                                                           |
| N | Q9LHJ9 | DR | protein serine/threonine phosphatase activity                                                                                                                                                       |
| N | Q9LIR2 | DE | Putative F-box/FBD/LRR-repeat protein At3g23955;                                                                                                                                                    |
| N | Q9LM71 | CC | PPIases accelerate the folding of proteins                                                                                                                                                          |
| N | Q9LM71 | CC | It catalyzes the cis-trans isomerization of proline imidic peptide bonds in oligopeptides (By similarity).                                                                                          |
| N | Q9LM71 | DE | Probable FKBP-type peptidyl-prolyl cis-trans isomerase 1, chloroplastic;                                                                                                                            |
| N | Q9LM71 | DR | peptidyl-prolyl cis-trans isomerase activity                                                                                                                                                        |
| N | Q9LM71 | DR | protein folding                                                                                                                                                                                     |
| N | Q9LMA1 | CC | Required for the establishment of systemic acquired resistance (SAR)                                                                                                                                |
| N | Q9LMA1 | CC | Confers a salicylic acid-dependent (SA) resistance to virulent pathogens such as <i>P.syringae</i> pv tomato and <i>H.parasitica</i> .                                                              |
| N | Q9LMA1 | CC | Not involved in local defense mechanisms                                                                                                                                                            |
| N | Q9LMA1 | DE | Probable flavin-containing monooxygenase 1;                                                                                                                                                         |
| N | Q9LMA1 | DR | defense response signaling pathway, resistance gene-dependent                                                                                                                                       |
| N | Q9LMA1 | DR | defense response signaling pathway, resistance gene-independent                                                                                                                                     |
| N | Q9LMA1 | DR | defense response to bacterium                                                                                                                                                                       |
| N | Q9LMA1 | DR | defense response to fungus                                                                                                                                                                          |
| N | Q9LMA1 | DR | flavin adenine dinucleotide binding                                                                                                                                                                 |
| N | Q9LMA1 | DR | flavin-containing monooxygenase activity                                                                                                                                                            |
| N | Q9LMA1 | DR | oxidation-reduction process                                                                                                                                                                         |
| N | Q9LMA1 | DR | plant-type hypersensitive response                                                                                                                                                                  |
| N | Q9LMA1 | DR | systemic acquired resistance                                                                                                                                                                        |
| N | Q9LQN6 | CC | Involved in leaf development regulation.                                                                                                                                                            |
| N | Q9LQN6 | DE | Probable protein phosphatase 2C 4;                                                                                                                                                                  |
| N | Q9LQN6 | DE | Protein POLTERGEIST-LIKE 5;                                                                                                                                                                         |
| N | Q9LQN6 | DE | Protein phosphatase 2C PLL5;                                                                                                                                                                        |
| N | Q9LQN6 | DR | leaf development                                                                                                                                                                                    |
| N | Q9LQN6 | DR | metal ion binding                                                                                                                                                                                   |
| N | Q9LQN6 | DR | phosphoprotein phosphatase activity                                                                                                                                                                 |
| N | Q9LQV2 | CC | RNA-dependent direct polymerase involved in antiviral silencing                                                                                                                                     |
| N | Q9LQV2 | CC | Involved in cucumber mosaic virus (CMV) silencing                                                                                                                                                   |
| N | Q9LQV2 | CC | Not involved in the production of siRNAs derived from a single- stranded 336-nucleotide satellite RNA of CMV.                                                                                       |
| N | Q9LQV2 | CC | Required for the biogenesis of viral secondary siRNAs, process that follows the production of primary siRNAs derived from viral RNA replication                                                     |
| N | Q9LQV2 | CC | Required for the production of some small RNAs (mainly 21 and some 22 nucleotides) derived from the crucifer-infecting tobamovirus (TMV-cg)                                                         |
| N | Q9LQV2 | CC | Required for cucumber mosaic virus (CMV) silencing and accumulation of viral satellite RNA.                                                                                                         |
| N | Q9LQV2 | CC | Specifically targets the positive-strand of the 3 RNA genomes of CMV and preferentially amplifies the 5'-terminal siRNAs of each viral genomic RNA                                                  |
| N | Q9LQV2 | DE | RNA-dependent RNA polymerase 1;                                                                                                                                                                     |
| N | Q9LQV2 | DE | RNA-directed RNA polymerase 1;                                                                                                                                                                      |
| N | Q9LQV2 | DR | RNA-directed RNA polymerase activity                                                                                                                                                                |
| N | Q9LQV2 | DR | defense response                                                                                                                                                                                    |
| N | Q9LQV2 | DR | gene silencing by RNA                                                                                                                                                                               |
| N | Q9LQV2 | DR | nucleotide binding                                                                                                                                                                                  |
| N | Q9LQV2 | DR | positive regulation of posttranscriptional gene silencing                                                                                                                                           |
| N | Q9LQV2 | DR | response to salicylic acid stimulus                                                                                                                                                                 |
| N | Q9LQV2 | DR | response to virus                                                                                                                                                                                   |
| N | Q9LUL5 | DE | Pentatricopeptide repeat-containing protein At3g14330;                                                                                                                                              |
| N | Q9LUP9 | DE | Putative F-box protein At3g17480;                                                                                                                                                                   |
| N | Q9LUQ9 | CC | Component of SCF(ASK-cullin-F-box) E3 ubiquitin ligase complexes, which may mediate the ubiquitination and subsequent proteasomal degradation of target proteins (By similarity).                   |
| N | Q9LUQ9 | DE | F-box/kelch-repeat protein At3g16740;                                                                                                                                                               |
| N | Q9LVX0 | CC | Might act as an E3 ubiquitin-protein ligase, or as part of E3 complex, which accepts ubiquitin from specific E2 ubiquitin- conjugating enzymes and then transfers it to substrates (By similarity). |
| N | Q9LVX0 | DE | ARIADNE-like protein ARI3;                                                                                                                                                                          |
| N | Q9LVX0 | DE | Probable E3 ubiquitin-protein ligase ARI3;                                                                                                                                                          |
| N | Q9LVX0 | DE | Protein ariadne homolog 3;                                                                                                                                                                          |
| N | Q9LVX0 | DR | ligase activity                                                                                                                                                                                     |
| N | Q9LVX0 | DR | zinc ion binding                                                                                                                                                                                    |
| N | Q9LWV3 | CC | Transcriptional activator that binds specifically to the DNA sequence 5'-TACGCGGAC-3'                                                                                                               |



|   |        |    |                                                                                                                                                                                              |
|---|--------|----|----------------------------------------------------------------------------------------------------------------------------------------------------------------------------------------------|
| N | Q9LWV3 | CC | Binding to the C-repeat/DRE element mediates high salinity- and dehydration-inducible transcription (By similarity).                                                                         |
| N | Q9LWV3 | DE | Dehydration-responsive element-binding protein 1C;                                                                                                                                           |
| N | Q9LWV3 | DE | Protein C-repeat-binding factor 1;                                                                                                                                                           |
| N | Q9LWV3 | DE | Protein DREB1C;                                                                                                                                                                              |
| N | Q9LWV3 | DR | regulation of transcription, DNA-dependent                                                                                                                                                   |
| N | Q9LWV3 | DR | response to stress                                                                                                                                                                           |
| N | Q9LWV3 | DR | sequence-specific DNA binding transcription factor activity                                                                                                                                  |
| N | Q9LXI4 | DE | Purple acid phosphatase 21;                                                                                                                                                                  |
| N | Q9LXI4 | DR | acid phosphatase activity                                                                                                                                                                    |
| N | Q9LXI4 | DR | metal ion binding                                                                                                                                                                            |
| N | Q9M0G4 | DE | Probable tyrosine decarboxylase 2;                                                                                                                                                           |
| N | Q9M0G4 | DR | aromatic-L-amino-acid decarboxylase activity                                                                                                                                                 |
| N | Q9M0G4 | DR | cellular amino acid metabolic process                                                                                                                                                        |
| N | Q9M0G4 | DR | pyridoxal phosphate binding                                                                                                                                                                  |
| N | Q9M0G4 | DR | response to stress                                                                                                                                                                           |
| N | Q9M0G4 | DR | tyrosine decarboxylase activity                                                                                                                                                              |
| N | Q9M0U8 | DE | Putative F-box/LRR-repeat protein 21;                                                                                                                                                        |
| N | Q9M1Y3 | CC | Component of SCF(ASK-cullin-F-box) E3 ubiquitin ligase complexes, which may mediate the ubiquitination and subsequent proteasomal degradation of target proteins (By similarity).            |
| N | Q9M1Y3 | DE | F-box/ankyrin repeat protein SKIP35;                                                                                                                                                         |
| N | Q9M1Y3 | DE | SKP1-interacting partner 35;                                                                                                                                                                 |
| N | Q9M2Q4 | DE | UPF0202 protein At3g57940;                                                                                                                                                                   |
| N | Q9M3K7 | DE | 30S ribosomal protein S18, chloroplastic;                                                                                                                                                    |
| N | Q9M3K7 | DR | structural constituent of ribosome                                                                                                                                                           |
| N | Q9M9U0 | DE | Putative glycosyltransferase 4;                                                                                                                                                              |
| N | Q9M9U0 | DR | transferase activity, transferring hexosyl groups                                                                                                                                            |
| N | Q9M9W3 | DE | Serine/threonine-protein phosphatase PP1 isozyme 9;                                                                                                                                          |
| N | Q9M9W3 | DR | metal ion binding                                                                                                                                                                            |
| N | Q9M9W3 | DR | phosphoprotein phosphatase activity                                                                                                                                                          |
| N | Q9MTJ3 | CC | DNA-dependent RNA polymerase catalyzes the transcription of DNA into RNA using the four ribonucleoside triphosphates as substrates.                                                          |
| N | Q9MTJ3 | DE | DNA-directed RNA polymerase subunit alpha;                                                                                                                                                   |
| N | Q9MTJ3 | DE | Plastid-encoded RNA polymerase subunit alpha;                                                                                                                                                |
| N | Q9MTJ3 | DE | RNA polymerase subunit alpha;                                                                                                                                                                |
| N | Q9MTJ3 | DR | DNA-directed RNA polymerase activity                                                                                                                                                         |
| N | Q9MTJ3 | DR | protein dimerization activity                                                                                                                                                                |
| N | Q9MUU7 | CC | No specific function has so far been attributed to this initiation factor; however, it seems to stimulate more or less all the activities of the other two initiation factors, IE 2 and IE 3 |
| N | Q9MUU7 | DE | Translation initiation factor IF-1, chloroplastic;                                                                                                                                           |
| N | Q9MUU7 | DR | translation initiation factor activity                                                                                                                                                       |
| N | Q9MYL0 | CC | Receptor for obesity factor (leptin)                                                                                                                                                         |
| N | Q9MYL0 | CC | Can also mediate the ERK/FOS signaling pathway (By similarity).                                                                                                                              |
| N | Q9MYL0 | CC | Involved in the regulation of fat metabolism and, in a hematopoietic pathway, required for normal lymphopoiesis                                                                              |
| N | Q9MYL0 | CC | May play a role in reproduction                                                                                                                                                              |
| N | Q9MYL0 | CC | On ligand binding, mediates signaling through JAK2/STAT3 (By similarity)                                                                                                                     |
| N | Q9MYL0 | DE | CD295;                                                                                                                                                                                       |
| N | Q9MYL0 | DE | Leptin receptor;                                                                                                                                                                             |
| N | Q9MYL0 | DE | OB receptor;                                                                                                                                                                                 |
| N | Q9MYL0 | DR | cytokine receptor activity                                                                                                                                                                   |
| N | Q9MZ06 | CC | Acts as a carrier protein that release fibroblast- binding factors (FGFs) from the extracellular matrix (EM) storage and thus enhance the mitogenic activity of FGFs                         |
| N | Q9MZ06 | CC | Enhances FGF2 signaling during tissue repair, angiogenesis and in tumor growth (By similarity).                                                                                              |
| N | Q9MZ06 | DE | FGF-binding protein 1;                                                                                                                                                                       |
| N | Q9MZ06 | DE | Fibroblast growth factor-binding protein 1;                                                                                                                                                  |
| N | Q9MZ06 | DR | growth factor binding                                                                                                                                                                        |
| N | Q9NNW7 | CC | Maintains thioredoxin in a reduced state                                                                                                                                                     |
| N | Q9NNW7 | CC | Implicated in the defenses against oxidative stress                                                                                                                                          |
| N | Q9NNW7 | CC | May play a role in redox- regulated cell signaling.                                                                                                                                          |
| N | Q9NNW7 | DE | Selenoprotein Z;                                                                                                                                                                             |
| N | Q9NNW7 | DE | Thioredoxin reductase 2, mitochondrial;                                                                                                                                                      |
| N | Q9NNW7 | DE | Thioredoxin reductase TR3;                                                                                                                                                                   |

|   |        |    |                                                                                                                                                                                     |
|---|--------|----|-------------------------------------------------------------------------------------------------------------------------------------------------------------------------------------|
| N | Q9NNW7 | DR | cell redox homeostasis                                                                                                                                                              |
| N | Q9NNW7 | DR | flavin adenine dinucleotide binding                                                                                                                                                 |
| N | Q9NNW7 | DR | oxidation-reduction process                                                                                                                                                         |
| N | Q9NNW7 | DR | protein binding                                                                                                                                                                     |
| N | Q9NNW7 | DR | response to oxygen radical                                                                                                                                                          |
| N | Q9NNW7 | DR | thioredoxin-disulfide reductase activity                                                                                                                                            |
| N | Q9NP81 | CC | Catalyzes the attachment of serine to tRNA(Ser)                                                                                                                                     |
| N | Q9NP81 | CC | Is also able to aminoacylate tRNA(Sec) with serine, to form the misacylated tRNA L-seryl-tRNA(Sec), which will be further converted into selenocysteinyl-tRNA(Sec) (By similarity). |
| N | Q9NP81 | DE | Serine--tRNA ligase;                                                                                                                                                                |
| N | Q9NP81 | DE | Seryl-tRNA synthetase, mitochondrial;                                                                                                                                               |
| N | Q9NP81 | DE | Seryl-tRNA(Ser/Sec) synthetase;                                                                                                                                                     |
| N | Q9NP81 | DR | protein binding                                                                                                                                                                     |
| N | Q9NP81 | DR | serine-tRNA ligase activity                                                                                                                                                         |
| N | Q9NP81 | DR | seryl-tRNA aminoacylation                                                                                                                                                           |
| N | Q9NQ75 | CC | Possible docking protein which may play a role for tyrosine-kinase-based signaling related to cell adhesion                                                                         |
| N | Q9NQ75 | CC | Regulates FAK activity, focal adhesion integrity, and cell spreading.                                                                                                               |
| N | Q9NQ75 | DE | Cas scaffolding protein family member 4;                                                                                                                                            |
| N | Q9NQ75 | DE | HEF-like protein;                                                                                                                                                                   |
| N | Q9NQ75 | DE | HEF1-EFS-p130Cas-like protein;                                                                                                                                                      |
| N | Q9NQ75 | DR | cell adhesion                                                                                                                                                                       |
| N | Q9NQ75 | DR | two-component sensor activity                                                                                                                                                       |
| N | Q9NQW1 | CC | As a component of the coat protein complex II (COPII), may function in vesicle budding and cargo export from the endoplasmic reticulum.                                             |
| N | Q9NQW1 | DE | Protein transport protein Sec31B;                                                                                                                                                   |
| N | Q9NQW1 | DE | SEC31-like protein 2;                                                                                                                                                               |
| N | Q9NQW1 | DE | SEC31-related protein B;                                                                                                                                                            |
| N | Q9NQW1 | DR | protein transport                                                                                                                                                                   |
| N | Q9NQW1 | DR | vesicle-mediated transport                                                                                                                                                          |
| N | Q9NS39 | CC | Does not act on glutamate receptor or on serotonin receptor subtype 2C                                                                                                              |
| N | Q9NS39 | CC | Capable of binding to dsRNA but also to ssRNA.                                                                                                                                      |
| N | Q9NS39 | DE | Double-stranded RNA-specific editase B2;                                                                                                                                            |
| N | Q9NS39 | DE | RNA-dependent adenosine deaminase 3;                                                                                                                                                |
| N | Q9NS39 | DE | RNA-editing deaminase 2;                                                                                                                                                            |
| N | Q9NS39 | DE | RNA-editing enzyme 2;                                                                                                                                                               |
| N | Q9NS39 | DE | dsRNA adenosine deaminase B2;                                                                                                                                                       |
| N | Q9NS39 | DR | adenosine deaminase activity                                                                                                                                                        |
| N | Q9NS39 | DR | double-stranded RNA binding                                                                                                                                                         |
| N | Q9NS39 | DR | mRNA processing                                                                                                                                                                     |
| N | Q9NS39 | DR | metal ion binding                                                                                                                                                                   |
| N | Q9NS39 | DR | single-stranded RNA binding                                                                                                                                                         |
| N | Q9NS93 | DE | Seven span transmembrane protein;                                                                                                                                                   |
| N | Q9NS93 | DE | Transmembrane 7 superfamily member 3;                                                                                                                                               |
| N | Q9NVR2 | CC | Component of the integrator complex, a complex involved in the snRNA nuclear RNAs (snRNA) U1 and U2 transcription and in their 3'-box-dependent processing                          |
| N | Q9NVR2 | CC | The Integrator complex is associated with the C-terminal domain (CTD) of RNA polymerase II largest subunit (POLR2A) and is recruited to the U1 and U2 snRNAs genes.                 |
| N | Q9NVR2 | DE | Integrator complex subunit 10;                                                                                                                                                      |
| N | Q9NVR2 | DR | protein binding                                                                                                                                                                     |
| N | Q9NVR2 | DR | snRNA processing                                                                                                                                                                    |
| N | Q9NXE4 | CC | Catalyzes the hydrolysis of membrane sphingomyelin to form phosphorylcholine and ceramide.                                                                                          |
| N | Q9NXE4 | DE | Neutral sphingomyelinase 3;                                                                                                                                                         |
| N | Q9NXE4 | DE | Neutral sphingomyelinase III;                                                                                                                                                       |
| N | Q9NXE4 | DE | Sphingomyelin phosphodiesterase 4;                                                                                                                                                  |
| N | Q9NXE4 | DR | metal ion binding                                                                                                                                                                   |
| N | Q9NXE4 | DR | protein binding                                                                                                                                                                     |
| N | Q9NXE4 | DR | sphingomyelin catabolic process                                                                                                                                                     |
| N | Q9NXE4 | DR | sphingomyelin phosphodiesterase D activity                                                                                                                                          |
| N | Q9NXE4 | DR | sphingomyelin phosphodiesterase activity                                                                                                                                            |
| N | Q9NYZ4 | CC | Putative adhesion molecule that mediates sialic-acid dependent binding to cells                                                                                                     |
| N | Q9NYZ4 | CC | Also binds to alpha-2,6-linked sialic acid                                                                                                                                          |

|   |        |    |                                                                                                                                                                   |
|---|--------|----|-------------------------------------------------------------------------------------------------------------------------------------------------------------------|
| N | Q9NYZ4 | CC | Preferentially binds to alpha-2,3- linked sialic acid                                                                                                             |
| N | Q9NYZ4 | CC | The sialic acid recognition site may be masked by cis interactions with sialic acids on the same cell surface.                                                    |
| N | Q9NYZ4 | DE | CD329;                                                                                                                                                            |
| N | Q9NYZ4 | DE | Sialic acid-binding Ig-like lectin 8;                                                                                                                             |
| N | Q9NYZ4 | DE | Sialoadhesin family member 2;                                                                                                                                     |
| N | Q9NYZ4 | DR | cell adhesion                                                                                                                                                     |
| N | Q9NYZ4 | DR | sugar binding                                                                                                                                                     |
| N | Q9NYZ4 | DR | transmembrane receptor activity                                                                                                                                   |
| N | Q9NZ32 | DE | Actin-related protein 10;                                                                                                                                         |
| N | Q9NZ32 | DE | Actin-related protein 11;                                                                                                                                         |
| N | Q9NZN3 | CC | Plays a role in endocytic transport.                                                                                                                              |
| N | Q9NZN3 | DE | EH domain-containing protein 3;                                                                                                                                   |
| N | Q9NZN3 | DE | PAST homolog 3;                                                                                                                                                   |
| N | Q9NZN3 | DR | GTPase activity                                                                                                                                                   |
| N | Q9NZN3 | DR | blood coagulation                                                                                                                                                 |
| N | Q9NZN3 | DR | calcium ion binding                                                                                                                                               |
| N | Q9NZN3 | DR | endocytic recycling                                                                                                                                               |
| N | Q9NZN3 | DR | nucleic acid binding                                                                                                                                              |
| N | Q9NZN3 | DR | protein binding                                                                                                                                                   |
| N | Q9NZN3 | DR | protein homooligomerization                                                                                                                                       |
| N | Q9P203 | DE | BTB/POZ domain-containing protein 7;                                                                                                                              |
| N | Q9P281 | DE | BAH and coiled-coil domain-containing protein 1;                                                                                                                  |
| N | Q9P281 | DE | BAH domain-containing protein 2;                                                                                                                                  |
| N | Q9P281 | DE | Bromo adjacent homology domain-containing protein 2;                                                                                                              |
| N | Q9P2F5 | DE | Storkhead-box protein 2;                                                                                                                                          |
| N | Q9P2F5 | DR | embryo development                                                                                                                                                |
| N | Q9P2F5 | DR | maternal placenta development                                                                                                                                     |
| N | Q9P2K5 | CC | Transcriptional repressor of the myelin basic protein gene (MBP)                                                                                                  |
| N | Q9P2K5 | CC | Binds to the proximal MB1 element 5'-TTGTCC-3' of the MBP promoter                                                                                                |
| N | Q9P2K5 | CC | Its binding to MB1 and function are inhibited by PURA (By similarity).                                                                                            |
| N | Q9P2K5 | DE | Myelin expression factor 2;                                                                                                                                       |
| N | Q9P2K5 | DR | nucleotide binding                                                                                                                                                |
| N | Q9P373 | CC | Probable cysteine protease necessary for autophagy and cytoplasm to vacuole transport (Cvt) (By similarity).                                                      |
| N | Q9P373 | DE | Autophagy-related protein 4;                                                                                                                                      |
| N | Q9P373 | DE | Probable cysteine protease atg4;                                                                                                                                  |
| N | Q9P373 | DR | cellular response to nitrogen starvation                                                                                                                          |
| N | Q9P373 | DR | cysteine-type peptidase activity                                                                                                                                  |
| N | Q9P373 | DR | protein transport                                                                                                                                                 |
| N | Q9P6R1 | CC | Involved in cytoskeletal organization and cellular growth                                                                                                         |
| N | Q9P6R1 | CC | May exert its effects on the cytoskeleton directly, or indirectly via proline-binding proteins such as profilin or proteins possessing SH3 domains                |
| N | Q9P6R1 | CC | Plays a role in actin patch assembly by enhancing the ability of myo1 to stimulate actin polymerization by the Arp2/3 complex.                                    |
| N | Q9P6R1 | DR | actin binding                                                                                                                                                     |
| N | Q9P6R1 | DR | actin cortical patch assembly                                                                                                                                     |
| N | Q9P6R1 | DR | actin nucleation                                                                                                                                                  |
| N | Q9P6R1 | DR | positive regulation of actin nucleation                                                                                                                           |
| N | Q9P6S4 | DE | Meiotic expression up-regulated protein 25;                                                                                                                       |
| N | Q9P7D1 | DE | Uncharacterized protein P4H10.18c;                                                                                                                                |
| N | Q9P869 | CC | This protein causes expression of glucose-repressible genes upon glucose derepression and has functional relationship to the protein-kinase SNF1 (By similarity). |
| N | Q9P869 | CC |                                                                                                                                                                   |
| N | Q9P869 | DE | Nuclear protein SNF4;                                                                                                                                             |
| N | Q9P869 | DR | carbohydrate metabolic process                                                                                                                                    |
| N | Q9P869 | DR | catalytic activity                                                                                                                                                |
| N | Q9PAE6 | CC | Cell wall formation (By similarity).                                                                                                                              |
| N | Q9PAE6 | DE | UDP-N-acetylenolpyruvoylglucosamine reductase;                                                                                                                    |
| N | Q9PAE6 | DE | UDP-N-acetylmuramate dehydrogenase;                                                                                                                               |
| N | Q9PAE6 | DR | UDP-N-acetylmuramate dehydrogenase activity                                                                                                                       |
| N | Q9PAE6 | DR | cell division                                                                                                                                                     |
| N | Q9PAE6 | DR | cellular cell wall organization                                                                                                                                   |
| N | Q9PAE6 | DR | flavin adenine dinucleotide binding                                                                                                                               |
| N | Q9PAE6 | DR | oxidation-reduction process                                                                                                                                       |
| N | Q9PAE6 | DR | peptidoglycan biosynthetic process                                                                                                                                |

|   |        |    |                                                                                                                                                                                                               |
|---|--------|----|---------------------------------------------------------------------------------------------------------------------------------------------------------------------------------------------------------------|
| N | Q9PAE6 | DR | regulation of cell shape                                                                                                                                                                                      |
| N | Q9PB76 | CC | Key enzyme in the regulation of glycerol uptake and metabolism.                                                                                                                                               |
| N | Q9PB76 | DE | ATP:glycerol 3-phosphotransferase;                                                                                                                                                                            |
| N | Q9PB76 | DE | Glycerokinase;                                                                                                                                                                                                |
| N | Q9PB76 | DE | Glycerol kinase;                                                                                                                                                                                              |
| N | Q9PB76 | DR | glycerol kinase activity                                                                                                                                                                                      |
| N | Q9PB76 | DR | glycerol-3-phosphate metabolic process                                                                                                                                                                        |
| N | Q9PC79 | CC | The ruvA-ruvB complex in the presence of ATP renatures cruciform structure in supercoiled DNA with palindromic sequence, indicating that it may promote strand exchange reactions in homologous recombination |
| N | Q9PC79 | CC | RuvAB is an helicase that mediates the Holliday junction migration by localized denaturation and reannealing (By similarity).                                                                                 |
| N | Q9PC79 | DE | Holliday junction ATP-dependent DNA helicase ruvB;                                                                                                                                                            |
| N | Q9PC79 | DR | DNA recombination                                                                                                                                                                                             |
| N | Q9PC79 | DR | four-way junction helicase activity                                                                                                                                                                           |
| N | Q9PDK4 | CC | The beta subunit is responsible for the synthesis of L- tryptophan from indole and L-serine.                                                                                                                  |
| N | Q9PDK4 | DE | Tryptophan synthase beta chain;                                                                                                                                                                               |
| N | Q9PDK4 | DR | pyridoxal phosphate binding                                                                                                                                                                                   |
| N | Q9PDK4 | DR | tryptophan synthase activity                                                                                                                                                                                  |
| N | Q9PE42 | CC | Involved in protein export                                                                                                                                                                                    |
| N | Q9PE42 | CC | Acts as a chaperone by maintaining the newly synthesized protein in an open conformation (By similarity).                                                                                                     |
| N | Q9PE42 | DE | Trigger factor;                                                                                                                                                                                               |
| N | Q9PE42 | DR | cell division                                                                                                                                                                                                 |
| N | Q9PE42 | DR | peptidyl-prolyl cis-trans isomerase activity                                                                                                                                                                  |
| N | Q9PE42 | DR | protein folding                                                                                                                                                                                               |
| N | Q9PE42 | DR | protein transport                                                                                                                                                                                             |
| N | Q9PGR9 | CC | Catalyzes the reversible reaction in which hydroxymethyl group from 5,10-methylenetetrahydrofolate is transferred onto alpha-ketoisovalerate to form ketopantoate (By similarity).                            |
| N | Q9PGR9 | DE | 3-methyl-2-oxobutanoate hydroxymethyltransferase;                                                                                                                                                             |
| N | Q9PGR9 | DE | Ketopantoate hydroxymethyltransferase;                                                                                                                                                                        |
| N | Q9PGR9 | DR | 3-methyl-2-oxobutanoate hydroxymethyltransferase activity                                                                                                                                                     |
| N | Q9PGR9 | DR | metal ion binding                                                                                                                                                                                             |
| N | Q9PGR9 | DR | methyltransferase activity                                                                                                                                                                                    |
| N | Q9PGR9 | DR | pantothenate biosynthetic process                                                                                                                                                                             |
| N | Q9PIX9 | DE | UPF0102 protein Cj0148c;                                                                                                                                                                                      |
| N | Q9PIX9 | DR | nuclease activity                                                                                                                                                                                             |
| N | Q9PK27 | CC | Catalyzes the specific phosphorylation of the 3-hydroxyl group of shikimic acid using ATP as a cosubstrate (By similarity).                                                                                   |
| N | Q9PK27 | DE | Shikimate kinase;                                                                                                                                                                                             |
| N | Q9PK27 | DR | aromatic amino acid family biosynthetic process                                                                                                                                                               |
| N | Q9PK27 | DR | metal ion binding                                                                                                                                                                                             |
| N | Q9PK27 | DR | shikimate kinase activity                                                                                                                                                                                     |
| N | Q9PKY3 | CC | Converts 2C-methyl-D-erythritol 2,4-cyclodiphosphate (ME-2,4cPP) into 1-hydroxy-2-methyl-2-(E)-butenyl 4-diphosphate (By similarity).                                                                         |
| N | Q9PKY3 | DE | 1-hydroxy-2-methyl-2-(E)-butenyl 4-diphosphate synthase;                                                                                                                                                      |
| N | Q9PKY3 | DE | 4-hydroxy-3-methylbut-2-en-1-yl diphosphate synthase;                                                                                                                                                         |
| N | Q9PKY3 | DR | 4 iron, 4 sulfur cluster binding                                                                                                                                                                              |
| N | Q9PKY3 | DR | 4-hydroxy-3-methylbut-2-en-1-yl diphosphate synthase activity                                                                                                                                                 |
| N | Q9PKY3 | DR | iron ion binding                                                                                                                                                                                              |
| N | Q9PKY3 | DR | oxidation-reduction process                                                                                                                                                                                   |
| N | Q9PKY3 | DR | terpenoid biosynthetic process                                                                                                                                                                                |
| N | Q9PL45 | DE | Polymorphic membrane protein G;                                                                                                                                                                               |
| N | Q9PL45 | DE | Probable outer membrane protein pmpG;                                                                                                                                                                         |
| N | Q9PLC0 | CC | Catalyzes the phosphorylation of the position 2 hydroxy group of 4-diphosphocytidyl-2C-methyl-D-erythritol (By similarity).                                                                                   |
| N | Q9PLC0 | DE | 4-(cytidine-5'-diphospho)-2-C-methyl-D-erythritol kinase;                                                                                                                                                     |
| N | Q9PLC0 | DE | 4-diphosphocytidyl-2-C-methyl-D-erythritol kinase;                                                                                                                                                            |
| N | Q9PLC0 | DR | 4-(cytidine 5'-diphospho)-2-C-methyl-D-erythritol kinase activity                                                                                                                                             |
| N | Q9PLC0 | DR | terpenoid biosynthetic process                                                                                                                                                                                |
| N | Q9PLH1 | CC | Involved in peptide bond synthesis                                                                                                                                                                            |
| N | Q9PLH1 | CC | probably functions indirectly by altering the affinity of the ribosome for aminoacyl-tRNA, thus increasing their reactivity as acceptors for peptidyl transferase (By similarity)                             |

|   |        |    |                                                                                                                                                                                                     |
|---|--------|----|-----------------------------------------------------------------------------------------------------------------------------------------------------------------------------------------------------|
| N | Q9PLH1 | CC | Stimulates efficient translation and peptide-bond synthesis on native or reconstituted 70S ribosomes in vitro                                                                                       |
| N | Q9PLH1 | DE | Elongation factor P 2;                                                                                                                                                                              |
| N | Q9PLH1 | DR | peptide biosynthetic process                                                                                                                                                                        |
| N | Q9PLH1 | DR | translation elongation factor activity                                                                                                                                                              |
| N | Q9PMP8 | CC | Transfers the 4'-phosphopantetheine moiety from coenzyme A to a Ser of acyl-carrier-protein (By similarity).                                                                                        |
| N | Q9PMP8 | DE | 4'-phosphopantetheinyl transferase AcpS;                                                                                                                                                            |
| N | Q9PMP8 | DE | Holo-ACP synthase;                                                                                                                                                                                  |
| N | Q9PMP8 | DE | Holo-[acyl-carrier-protein] synthase;                                                                                                                                                               |
| N | Q9PMP8 | DR | fatty acid biosynthetic process                                                                                                                                                                     |
| N | Q9PMP8 | DR | holo-[acyl-carrier-protein] synthase activity                                                                                                                                                       |
| N | Q9PMP8 | DR | macromolecule biosynthetic process                                                                                                                                                                  |
| N | Q9PMP8 | DR | magnesium ion binding                                                                                                                                                                               |
| N | Q9PNL3 | CC | Condenses 4-methyl-5-(beta-hydroxyethyl)thiazole monophosphate (THZ-P) and 2-methyl-4-amino-5-hydroxymethyl pyrimidine pyrophosphate (HMP-PP) to form thiamine monophosphate (TMP) (By similarity). |
| N | Q9PNL3 | DE | TMP pyrophosphorylase;                                                                                                                                                                              |
| N | Q9PNL3 | DE | Thiamine-phosphate pyrophosphorylase;                                                                                                                                                               |
| N | Q9PNL3 | DE | Thiamine-phosphate synthase;                                                                                                                                                                        |
| N | Q9PNL3 | DR | metal ion binding                                                                                                                                                                                   |
| N | Q9PNL3 | DR | thiamine biosynthetic process                                                                                                                                                                       |
| N | Q9PNL3 | DR | thiamine-phosphate diphosphorylase activity                                                                                                                                                         |
| N | Q9PP06 | CC | Catalyzes a salvage reaction resulting in the formation of AMP, that is energetically less costly than de novo synthesis.                                                                           |
| N | Q9PP06 | DE | Adenine phosphoribosyltransferase;                                                                                                                                                                  |
| N | Q9PP06 | DR | adenine phosphoribosyltransferase activity                                                                                                                                                          |
| N | Q9PP06 | DR | adenine salvage                                                                                                                                                                                     |
| N | Q9PP06 | DR | purine ribonucleoside salvage                                                                                                                                                                       |
| N | Q9PPT8 | CC | Binds as a heterodimer with protein S6 to the central domain of the 16S rRNA, where it helps stabilize the platform of the 30S subunit (By similarity).                                             |
| N | Q9PPT8 | DE | 30S ribosomal protein S18;                                                                                                                                                                          |
| N | Q9PPT8 | DR | structural constituent of ribosome                                                                                                                                                                  |
| N | Q9PQQ5 | CC | This protein binds specifically to 23S rRNA; its binding is stimulated by other ribosomal proteins, e.g., L4, L17, and L20                                                                          |
| N | Q9PQQ5 | CC | It is important during the early stages of 50S assembly                                                                                                                                             |
| N | Q9PQQ5 | CC | It makes multiple contacts with different domains of the 23S rRNA in the assembled 50S subunit and ribosome (By similarity).                                                                        |
| N | Q9PQQ5 | DE | 50S ribosomal protein L22;                                                                                                                                                                          |
| N | Q9PQQ5 | DR | structural constituent of ribosome                                                                                                                                                                  |
| N | Q9PR42 | CC | The UvrABC repair system catalyzes the recognition and processing of DNA lesions                                                                                                                    |
| N | Q9PR42 | CC | A damage recognition complex composed of 2 UvrA and 2 UvrB subunits scans DNA for abnormalities                                                                                                     |
| N | Q9PR42 | CC | UvrA is an ATPase and a DNA-binding protein                                                                                                                                                         |
| N | Q9PR42 | CC | When the presence of a lesion has been verified by UvrB, the UvrA molecules dissociate (By similarity).                                                                                             |
| N | Q9PR42 | DE | Excinuclease ABC subunit A;                                                                                                                                                                         |
| N | Q9PR42 | DE | UvrA protein;                                                                                                                                                                                       |
| N | Q9PR42 | DE | UvrABC system protein A;                                                                                                                                                                            |
| N | Q9PR42 | DR | ATPase activity                                                                                                                                                                                     |
| N | Q9PR42 | DR | excinuclease ABC activity                                                                                                                                                                           |
| N | Q9PR42 | DR | metal ion binding                                                                                                                                                                                   |
| N | Q9PR42 | DR | nucleotide-excision repair                                                                                                                                                                          |
| N | Q9PRA6 | CC | NAD-binding protein involved in the addition of a carboxymethylaminomethyl (cmnm) group at the wobble position (U34) of certain tRNAs, forming tRNA-cmnm(5)s(2)U34 (By similarity).                 |
| N | Q9PRA6 | DE | Glucose-inhibited division protein A;                                                                                                                                                               |
| N | Q9PRA6 | DE | tRNA uridine 5-carboxymethylaminomethyl modification enzyme MnmG;                                                                                                                                   |
| N | Q9PRA6 | DR | flavin adenine dinucleotide binding                                                                                                                                                                 |
| N | Q9PRA6 | DR | tRNA wobble uridine modification                                                                                                                                                                    |
| N | Q9PUI7 | CC | Involved in cannabinoid-induced CNS effects                                                                                                                                                         |
| N | Q9PUI7 | CC | Acts by inhibiting adenylate cyclase (By similarity).                                                                                                                                               |
| N | Q9PUI7 | DE | Cannabinoid receptor 1;                                                                                                                                                                             |
| N | Q9PUI7 | DR | cannabinoid receptor activity                                                                                                                                                                       |
| N | Q9QSK4 | DE | Putative helicase 022L;                                                                                                                                                                             |

|   |        |    |                                                                                                                                                                                                                               |
|---|--------|----|-------------------------------------------------------------------------------------------------------------------------------------------------------------------------------------------------------------------------------|
| N | Q9QSK4 | DR | helicase activity                                                                                                                                                                                                             |
| N | Q9QW30 | CC | Functions as a receptor for membrane-bound ligands Jagged1, Jagged2 and Delta1 to regulate cell-fate determination                                                                                                            |
| N | Q9QW30 | CC | Affects the implementation of differentiation, proliferation and apoptotic processes                                                                                                                                          |
| N | Q9QW30 | CC | May play an essential role in postimplantation development, probably in some aspect of cell specification and/or differentiation (By similarity).                                                                             |
| N | Q9QW30 | CC | Upon ligand activation through the released notch intracellular domain (NICD) it forms a transcriptional activator complex with RBPJ/RBPSUH and activates genes of the enhancer of split locus                                |
| N | Q9QW30 | DE | Neurogenic locus notch homolog protein 2;                                                                                                                                                                                     |
| N | Q9QW30 | DE | Notch 2 extracellular truncation;                                                                                                                                                                                             |
| N | Q9QW30 | DE | Notch 2 intracellular domain;                                                                                                                                                                                                 |
| N | Q9QW30 | DR | Notch signaling pathway                                                                                                                                                                                                       |
| N | Q9QW30 | DR | calcium ion binding                                                                                                                                                                                                           |
| N | Q9QW30 | DR | cell cycle arrest                                                                                                                                                                                                             |
| N | Q9QW30 | DR | cell fate determination                                                                                                                                                                                                       |
| N | Q9QW30 | DR | negative regulation of cell proliferation                                                                                                                                                                                     |
| N | Q9QW30 | DR | organ morphogenesis                                                                                                                                                                                                           |
| N | Q9QW30 | DR | positive regulation of Ras protein signal transduction                                                                                                                                                                        |
| N | Q9QW30 | DR | receptor activity                                                                                                                                                                                                             |
| N | Q9QW30 | DR | regulation of developmental process                                                                                                                                                                                           |
| N | Q9QW30 | DR | tissue regeneration                                                                                                                                                                                                           |
| N | Q9QWM1 | CC | Binds to promoters containing the sequence element 5'-AAGCAAGGAGCCTGAG-3'                                                                                                                                                     |
| N | Q9QWM1 | CC | May play a role in embryonic development (By similarity).                                                                                                                                                                     |
| N | Q9QWM1 | CC | Plays a role in the regulation of gene expression in liver and pancreas                                                                                                                                                       |
| N | Q9QWM1 | DE | FTZ-F1 beta;                                                                                                                                                                                                                  |
| N | Q9QWM1 | DE | Liver receptor homolog 1;                                                                                                                                                                                                     |
| N | Q9QWM1 | DE | Nuclear receptor subfamily 5 group A member 2;                                                                                                                                                                                |
| N | Q9QWM1 | DR | lipid binding                                                                                                                                                                                                                 |
| N | Q9QWM1 | DR | steroid hormone receptor activity                                                                                                                                                                                             |
| N | Q9QWM1 | DR | transcription activator activity                                                                                                                                                                                              |
| N | Q9QWM1 | DR | zinc ion binding                                                                                                                                                                                                              |
| N | Q9R0M6 | CC | Involved in the transport of proteins between the endosomes and the trans-Golgi network (By similarity).                                                                                                                      |
| N | Q9R0M6 | DE | Ras-related protein Rab-9A;                                                                                                                                                                                                   |
| N | Q9R0M6 | DR | GTPase activity                                                                                                                                                                                                               |
| N | Q9R0M6 | DR | protein transport                                                                                                                                                                                                             |
| N | Q9R0M6 | DR | small GTPase mediated signal transduction                                                                                                                                                                                     |
| N | Q9R1T7 | CC | Enhances all basic T-cell responses to a foreign antigen, namely proliferation, secretion of lymphokines, up-regulation of molecules that mediate cell-cell interaction, and effective help for antibody secretion by B-cells |
| N | Q9R1T7 | CC | Does not up-regulate the production of interleukin-2, but superinduces the synthesis of interleukin-10                                                                                                                        |
| N | Q9R1T7 | CC | Essential both for efficient interaction between T and B-cells and for normal antibody responses to T-cell dependent antigens                                                                                                 |
| N | Q9R1T7 | CC | Plays a critical role in CD40-mediated class switching of immunoglobulin isotypes (By similarity).                                                                                                                            |
| N | Q9R1T7 | CC | Prevents the apoptosis of pre-activated T-cells                                                                                                                                                                               |
| N | Q9R1T7 | DE | Activation-inducible lymphocyte immunomediatory molecule;                                                                                                                                                                     |
| N | Q9R1T7 | DE | CD278;                                                                                                                                                                                                                        |
| N | Q9R1T7 | DE | Inducible T-cell costimulator;                                                                                                                                                                                                |
| N | Q9R1T7 | DR | T cell costimulation                                                                                                                                                                                                          |
| N | Q9R1T7 | DR | T cell tolerance induction                                                                                                                                                                                                    |
| N | Q9R1T7 | DR | cell-cell adhesion                                                                                                                                                                                                            |
| N | Q9R233 | CC | Involved in the association of MHC class I with transporter associated with antigen processing (TAP) and in the assembly of MHC class I with peptide (peptide loading)                                                        |
| N | Q9R233 | DE | TAP-associated protein;                                                                                                                                                                                                       |
| N | Q9R233 | DE | TAP-binding protein;                                                                                                                                                                                                          |
| N | Q9R233 | DR | antigen processing and presentation of endogenous peptide antigen via MHC class I                                                                                                                                             |
| N | Q9R233 | DR | antigen processing and presentation of exogenous peptide antigen via MHC class I, TAP-dependent                                                                                                                               |
| N | Q9R233 | DR | defense response                                                                                                                                                                                                              |
| N | Q9R233 | DR | peptide antigen stabilization                                                                                                                                                                                                 |
| N | Q9RDV3 | CC | Specifically methylates guanosine-37 in various tRNAs (By similarity).                                                                                                                                                        |
| N | Q9RDV3 | DE | M1G-methyltransferase;                                                                                                                                                                                                        |

|   |        |    |                                                                                                                                                                                                              |
|---|--------|----|--------------------------------------------------------------------------------------------------------------------------------------------------------------------------------------------------------------|
| N | Q9RDV3 | DE | tRNA (guanine-N(1)-)-methyltransferase;                                                                                                                                                                      |
| N | Q9RDV3 | DE | tRNA [GM37] methyltransferase;                                                                                                                                                                               |
| N | Q9RDV3 | DR | tRNA (guanine-N1-)-methyltransferase activity                                                                                                                                                                |
| N | Q9RFF5 | DE | Urea amidohydrolase subunit gamma;                                                                                                                                                                           |
| N | Q9RFF5 | DE | Urease subunit gamma;                                                                                                                                                                                        |
| N | Q9RFF5 | DR | nickel ion binding                                                                                                                                                                                           |
| N | Q9RFF5 | DR | urea metabolic process                                                                                                                                                                                       |
| N | Q9RFF5 | DR | urease activity                                                                                                                                                                                              |
| N | Q9RHW9 | DE | FGAM synthase II;                                                                                                                                                                                            |
| N | Q9RHW9 | DE | Phosphoribosylformylglycinamide synthase 2;                                                                                                                                                                  |
| N | Q9RHW9 | DE | Phosphoribosylformylglycinamide synthase II;                                                                                                                                                                 |
| N | Q9RHW9 | DR | 'de novo' IMP biosynthetic process                                                                                                                                                                           |
| N | Q9RHW9 | DR | phosphoribosylformylglycinamide synthase activity                                                                                                                                                            |
| N | Q9RJM5 | DE | NH(3)-dependent NAD(+) synthetase;                                                                                                                                                                           |
| N | Q9RJM5 | DR | NAD biosynthetic process                                                                                                                                                                                     |
| N | Q9RJM5 | DR | NAD+ synthase (glutamine-hydrolyzing) activity                                                                                                                                                               |
| N | Q9RJM5 | DR | NAD+ synthase activity                                                                                                                                                                                       |
| N | Q9RL99 | CC | Catalyzes the formation of S-adenosylmethionine from methionine and ATP                                                                                                                                      |
| N | Q9RL99 | CC | The overall synthetic reaction is composed of two sequential steps, AdoMet formation and the subsequent tripolyphosphate hydrolysis which occurs prior to release of AdoMet from the enzyme (By similarity). |
| N | Q9RL99 | DE | AdoMet synthase;                                                                                                                                                                                             |
| N | Q9RL99 | DE | Methionine adenosyltransferase;                                                                                                                                                                              |
| N | Q9RL99 | DE | S-adenosylmethionine synthase;                                                                                                                                                                               |
| N | Q9RL99 | DR | metal ion binding                                                                                                                                                                                            |
| N | Q9RL99 | DR | methionine adenosyltransferase activity                                                                                                                                                                      |
| N | Q9RL99 | DR | one-carbon metabolic process                                                                                                                                                                                 |
| N | Q9RNL5 | CC | Required for the insertion of integral membrane proteins into the membrane                                                                                                                                   |
| N | Q9RNL5 | CC | Involved in integration of membrane proteins that insert dependently and independently of the Sec translocase complex (By similarity).                                                                       |
| N | Q9RNL5 | CC | Probably plays an essential role in the integration of proteins of the respiratory chain complexes                                                                                                           |
| N | Q9RNL5 | DE | Inner membrane protein oxaA;                                                                                                                                                                                 |
| N | Q9RNL5 | DR | protein insertion into membrane                                                                                                                                                                              |
| N | Q9RQF8 | CC | Catalyzes a salvage reaction resulting in the formation of AMP, that is energetically less costly than de novo synthesis.                                                                                    |
| N | Q9RQF8 | DE | Adenine phosphoribosyltransferase;                                                                                                                                                                           |
| N | Q9RQF8 | DR | adenine phosphoribosyltransferase activity                                                                                                                                                                   |
| N | Q9RQF8 | DR | adenine salvage                                                                                                                                                                                              |
| N | Q9RQF8 | DR | purine ribonucleoside salvage                                                                                                                                                                                |
| N | Q9RR89 | CC | Catalyzes the phosphorylation of the position 2 hydroxy group of 4-diphosphocytidyl-2C-methyl-D-erythritol (By similarity).                                                                                  |
| N | Q9RR89 | DE | 4-(cytidine-5'-diphospho)-2-C-methyl-D-erythritol kinase;                                                                                                                                                    |
| N | Q9RR89 | DE | 4-diphosphocytidyl-2-C-methyl-D-erythritol kinase;                                                                                                                                                           |
| N | Q9RR89 | DR | 4-(cytidine 5'-diphospho)-2-C-methyl-D-erythritol kinase activity                                                                                                                                            |
| N | Q9RR89 | DR | terpenoid biosynthetic process                                                                                                                                                                               |
| N | Q9RR92 | DE | Acetate kinase;                                                                                                                                                                                              |
| N | Q9RR92 | DE | Acetokinase;                                                                                                                                                                                                 |
| N | Q9RR92 | DR | acetate kinase activity                                                                                                                                                                                      |
| N | Q9RR92 | DR | organic acid metabolic process                                                                                                                                                                               |
| N | Q9RSL3 | CC | It is located near the subunit interface in the base of the L7/L12 stalk, and near the tRNA binding site of the peptidyltransferase center (By similarity)                                                   |
| N | Q9RSL3 | CC | This protein binds to the 23S rRNA, and is important in its secondary structure.                                                                                                                             |
| N | Q9RSL3 | DE | 50S ribosomal protein L6;                                                                                                                                                                                    |
| N | Q9RSL3 | DR | structural constituent of ribosome                                                                                                                                                                           |
| N | Q9RT62 | DE | DegV domain-containing protein DR_1903;                                                                                                                                                                      |
| N | Q9RVW0 | CC | DNA-dependent RNA polymerase catalyzes the transcription of DNA into RNA using the four ribonucleoside triphosphates as substrates.                                                                          |
| N | Q9RVW0 | DE | DNA-directed RNA polymerase subunit beta';                                                                                                                                                                   |
| N | Q9RVW0 | DE | RNA polymerase subunit beta';                                                                                                                                                                                |
| N | Q9RVW0 | DE | RNAP subunit beta';                                                                                                                                                                                          |
| N | Q9RVW0 | DE | Transcriptase subunit beta';                                                                                                                                                                                 |
| N | Q9RVW0 | DR | DNA-directed RNA polymerase activity                                                                                                                                                                         |
| N | Q9RYG9 | DE | Aldehyde dehydrogenase;                                                                                                                                                                                      |
| N | Q9RYG9 | DR | aldehyde dehydrogenase (NAD) activity                                                                                                                                                                        |

|   |        |    |                                                                                                                                      |
|---|--------|----|--------------------------------------------------------------------------------------------------------------------------------------|
| N | Q9RYG9 | DR | oxidation-reduction process                                                                                                          |
| N | Q9S0S3 | CC | Exhibits lactonase activity                                                                                                          |
| N | Q9S0S3 | CC | Acts in cells with perturbed membrane integrity and is possibly related to the membrane homeostasis                                  |
| N | Q9S0S3 | CC | Contributes to bacitracin resistance (By similarity).                                                                                |
| N | Q9S0S3 | DE | Lactonase drp35;                                                                                                                     |
| N | Q9S0S3 | DR | hydrolase activity                                                                                                                   |
| N | Q9S0S3 | DR | metal ion binding                                                                                                                    |
| N | Q9S0S3 | DR | response to antibiotic                                                                                                               |
| N | Q9S597 | CC | Promotes colloid osmotic lysis by binding to the midgut epithelial cells of insects.                                                 |
| N | Q9S597 | DE | 94 kDa crystal protein;                                                                                                              |
| N | Q9S597 | DE | Crystalline entomocidal protoxin;                                                                                                    |
| N | Q9S597 | DE | Insecticidal delta-endotoxin CryXXVIIA(a);                                                                                           |
| N | Q9S597 | DE | Pesticidal crystal protein cry27Aa;                                                                                                  |
| N | Q9S597 | DR | defense response                                                                                                                     |
| N | Q9S597 | DR | receptor binding                                                                                                                     |
| N | Q9S597 | DR | sporulation resulting in formation of a cellular spore                                                                               |
| N | Q9SIA1 | DE | MATE efflux family protein 8;                                                                                                        |
| N | Q9SIA1 | DE | Protein DETOXIFICATION 1-like 4;                                                                                                     |
| N | Q9SIA1 | DE | Protein DTX5;                                                                                                                        |
| N | Q9SIA1 | DR | antiporter activity                                                                                                                  |
| N | Q9SIA1 | DR | drug transmembrane transporter activity                                                                                              |
| N | Q9SJF0 | CC | Phosphatase involved in elongation process, probably by acting as a regulator of brassinolide signaling.                             |
| N | Q9SJF0 | DE | BSU1-like protein 2;                                                                                                                 |
| N | Q9SJF0 | DE | Serine/threonine-protein phosphatase BSL2;                                                                                           |
| N | Q9SJF0 | DR | iron ion binding                                                                                                                     |
| N | Q9SJF0 | DR | manganese ion binding                                                                                                                |
| N | Q9SJF0 | DR | phosphoprotein phosphatase activity                                                                                                  |
| N | Q9SPL5 | CC | Antimicrobial peptides 2b, 2c and 2d have antibacterial and antifungal activity against a range of species (By similarity).          |
| N | Q9SPL5 | DE | Antimicrobial peptide 2a;                                                                                                            |
| N | Q9SPL5 | DE | Antimicrobial peptide 2b;                                                                                                            |
| N | Q9SPL5 | DE | Antimicrobial peptide 2c-1;                                                                                                          |
| N | Q9SPL5 | DE | Antimicrobial peptide 2c-2;                                                                                                          |
| N | Q9SPL5 | DE | Antimicrobial peptide 2c-3;                                                                                                          |
| N | Q9SPL5 | DE | Antimicrobial peptide 2d;                                                                                                            |
| N | Q9SPL5 | DE | MiAMP2c-1;                                                                                                                           |
| N | Q9SPL5 | DE | MiAMP2c-2;                                                                                                                           |
| N | Q9SPL5 | DE | MiAMP2c-3;                                                                                                                           |
| N | Q9SPL5 | DE | Vicilin-like antimicrobial peptides 2-1;                                                                                             |
| N | Q9SPL5 | DR | defense response to bacterium                                                                                                        |
| N | Q9SPL5 | DR | defense response to fungus                                                                                                           |
| N | Q9SPL5 | DR | killing of cells of other organism                                                                                                   |
| N | Q9SPL5 | DR | nutrient reservoir activity                                                                                                          |
| N | Q9SSD1 | CC | May participate in the initiation of asymmetric divisions that form stomata by sensing positional cues during epidermal development. |
| N | Q9SSD1 | DE | Protein TOO MANY MOUTHS;                                                                                                             |
| N | Q9SSD1 | DE | Receptor-like protein 17;                                                                                                            |
| N | Q9SSD1 | DR | asymmetric cell division                                                                                                             |
| N | Q9SSD1 | DR | protein binding                                                                                                                      |
| N | Q9SSD1 | DR | response to abscisic acid stimulus                                                                                                   |
| N | Q9STL2 | DE | Cytochrome P450 71A21;                                                                                                               |
| N | Q9STL2 | DR | electron carrier activity                                                                                                            |
| N | Q9STL2 | DR | monooxygenase activity                                                                                                               |
| N | Q9STL2 | DR | oxidation-reduction process                                                                                                          |
| N | Q9SUE7 | CC | Histone methyltransferase (By similarity).                                                                                           |
| N | Q9SUE7 | DE | Histone-lysine N-methyltransferase ATX4;                                                                                             |
| N | Q9SUE7 | DE | Protein SET DOMAIN GROUP 16;                                                                                                         |
| N | Q9SUE7 | DE | TRX-homolog protein 4;                                                                                                               |
| N | Q9SUE7 | DE | Trithorax 4;                                                                                                                         |
| N | Q9SUE7 | DE | Trithorax-homolog protein 4;                                                                                                         |
| N | Q9SUE7 | DR | histone-lysine N-methyltransferase activity                                                                                          |
| N | Q9SUE7 | DR | zinc ion binding                                                                                                                     |



|   |        |    |                                                                                                                                                                                                                                        |
|---|--------|----|----------------------------------------------------------------------------------------------------------------------------------------------------------------------------------------------------------------------------------------|
| N | Q9SUR9 | CC | Functions in R gene-mediated resistance, but participates in a lower extent than SGT1B to RPP5-mediated resistance                                                                                                                     |
| N | Q9SUR9 | CC | Not required for RPM1, RPS2, RPS4 and RPS5-mediated resistance                                                                                                                                                                         |
| N | Q9SUR9 | CC | Probably required for SCF-mediated ubiquitination, by coupling HSP90 to SCF complex for ubiquitination of HSP90 client proteins.                                                                                                       |
| N | Q9SUR9 | DE | Protein SGT1 homolog A;                                                                                                                                                                                                                |
| N | Q9SUR9 | DE | Suppressor of G2 allele of SKP1 homolog A;                                                                                                                                                                                             |
| N | Q9SUR9 | DR | cellular response to auxin stimulus                                                                                                                                                                                                    |
| N | Q9SUR9 | DR | innate immune response                                                                                                                                                                                                                 |
| N | Q9SUR9 | DR | protein binding                                                                                                                                                                                                                        |
| N | Q9SUR9 | DR | regulation of defense response to fungus, incompatible interaction                                                                                                                                                                     |
| N | Q9SUT0 | DE | Probable cysteine proteinase At4g11310;                                                                                                                                                                                                |
| N | Q9SUT0 | DR | cysteine-type endopeptidase activity                                                                                                                                                                                                   |
| N | Q9T9J5 | CC | Component of the ubiquinol-cytochrome c reductase complex (complex III or cytochrome b-c1 complex), which is a respiratory chain that generates an electrochemical potential coupled to ATP synthesis (By similarity).                 |
| N | Q9T9J5 | DE | Complex III subunit 3;                                                                                                                                                                                                                 |
| N | Q9T9J5 | DE | Complex III subunit III;                                                                                                                                                                                                               |
| N | Q9T9J5 | DE | Cytochrome b-c1 complex subunit 3;                                                                                                                                                                                                     |
| N | Q9T9J5 | DE | Cytochrome b;                                                                                                                                                                                                                          |
| N | Q9T9J5 | DE | Ubiquinol-cytochrome-c reductase complex cytochrome b subunit;                                                                                                                                                                         |
| N | Q9T9J5 | DR | electron carrier activity                                                                                                                                                                                                              |
| N | Q9T9J5 | DR | metal ion binding                                                                                                                                                                                                                      |
| N | Q9T9J5 | DR | oxidoreductase activity                                                                                                                                                                                                                |
| N | Q9T9J5 | DR | respiratory electron transport chain                                                                                                                                                                                                   |
| N | Q9TDK9 | CC | Component of the ubiquinol-cytochrome c reductase complex (complex III or cytochrome b-c1 complex), which is a respiratory chain that generates an electrochemical potential coupled to ATP synthesis (By similarity).                 |
| N | Q9TDK9 | DE | Complex III subunit 3;                                                                                                                                                                                                                 |
| N | Q9TDK9 | DE | Complex III subunit III;                                                                                                                                                                                                               |
| N | Q9TDK9 | DE | Cytochrome b-c1 complex subunit 3;                                                                                                                                                                                                     |
| N | Q9TDK9 | DE | Cytochrome b;                                                                                                                                                                                                                          |
| N | Q9TDK9 | DE | Ubiquinol-cytochrome-c reductase complex cytochrome b subunit;                                                                                                                                                                         |
| N | Q9TDK9 | DR | electron carrier activity                                                                                                                                                                                                              |
| N | Q9TDK9 | DR | metal ion binding                                                                                                                                                                                                                      |
| N | Q9TDK9 | DR | oxidoreductase activity                                                                                                                                                                                                                |
| N | Q9TDK9 | DR | respiratory electron transport chain                                                                                                                                                                                                   |
| N | Q9TF37 | CC | Component of the ubiquinol-cytochrome c reductase complex (complex III or cytochrome b-c1 complex), which is a respiratory chain that generates an electrochemical potential coupled to ATP synthesis (By similarity).                 |
| N | Q9TF37 | DE | Complex III subunit 3;                                                                                                                                                                                                                 |
| N | Q9TF37 | DE | Complex III subunit III;                                                                                                                                                                                                               |
| N | Q9TF37 | DE | Cytochrome b-c1 complex subunit 3;                                                                                                                                                                                                     |
| N | Q9TF37 | DE | Cytochrome b;                                                                                                                                                                                                                          |
| N | Q9TF37 | DE | Ubiquinol-cytochrome-c reductase complex cytochrome b subunit;                                                                                                                                                                         |
| N | Q9TF37 | DR | electron carrier activity                                                                                                                                                                                                              |
| N | Q9TF37 | DR | metal ion binding                                                                                                                                                                                                                      |
| N | Q9TF37 | DR | oxidoreductase activity                                                                                                                                                                                                                |
| N | Q9TF37 | DR | respiratory electron transport chain                                                                                                                                                                                                   |
| N | Q9TL01 | CC | Component of the cytochrome b6-f complex, which mediates electron transfer between photosystem II (PSII) and photosystem I (PSI), cyclic electron flow around PSI, and state transitions (By similarity).                              |
| N | Q9TL01 | DE | Cytochrome b6-f complex subunit 8;                                                                                                                                                                                                     |
| N | Q9TL01 | DE | Cytochrome b6-f complex subunit VIII;                                                                                                                                                                                                  |
| N | Q9TL01 | DE | Cytochrome b6-f complex subunit petN;                                                                                                                                                                                                  |
| N | Q9TL01 | DR | cytochrome complex assembly                                                                                                                                                                                                            |
| N | Q9TL01 | DR | electron transport chain                                                                                                                                                                                                               |
| N | Q9TL01 | DR | electron transporter, transferring electrons within cytochrome b6/f complex of photosystem II activity                                                                                                                                 |
| N | Q9TL01 | DR | photosynthesis                                                                                                                                                                                                                         |
| N | Q9TLQ8 | CC | IGF5 catalyzes the conversion of PKFAR and glutamine to IGF, AICAR and The msf subunit provides the glutamine amidotransferase activity that produces the ammonia necessary to hisF for the synthesis of IGP and AICAR (By similarity) |
| N | Q9TLQ8 | CC | IGP synthase glutamine amidotransferase subunit;                                                                                                                                                                                       |
| N | Q9TLQ8 | DE | IGP synthase subunit hisH;                                                                                                                                                                                                             |
| N | Q9TLQ8 | DE |                                                                                                                                                                                                                                        |

|   |        |    |                                                                                                                                                 |
|---|--------|----|-------------------------------------------------------------------------------------------------------------------------------------------------|
| N | Q9TLQ8 | DE | IGPS subunit hisH;                                                                                                                              |
| N | Q9TLQ8 | DE | ImGP synthase subunit hisH;                                                                                                                     |
| N | Q9TLQ8 | DE | Imidazole glycerol phosphate synthase subunit hisH;                                                                                             |
| N | Q9TLQ8 | DR | glutamine metabolic process                                                                                                                     |
| N | Q9TLQ8 | DR | histidine biosynthetic process                                                                                                                  |
| N | Q9TLQ8 | DR | transferase activity, transferring pentosyl groups                                                                                              |
| N | Q9TLT6 | CC | Protein S19 forms a complex with S13 that binds strongly to the 16S ribosomal RNA (By similarity).                                              |
| N | Q9TLT6 | DE | 30S ribosomal protein S19, chloroplastic;                                                                                                       |
| N | Q9TLT6 | DR | structural constituent of ribosome                                                                                                              |
| N | Q9TLT8 | DE | 30S ribosomal protein S3, chloroplastic;                                                                                                        |
| N | Q9TLT8 | DR | structural constituent of ribosome                                                                                                              |
| N | Q9TM07 | CC | Possible role in chlorophyll and/or carotenoid binding.                                                                                         |
| N | Q9TM07 | DE | Uncharacterized protein ycf17;                                                                                                                  |
| N | Q9TM07 | DR | chlorophyll binding                                                                                                                             |
| N | Q9TM07 | DR | protein-chromophore linkage                                                                                                                     |
| N | Q9TUI4 | CC | Core-forming (alpha) subunit of voltage-gated inwardly rectifying potassium channel                                                             |
| N | Q9TUI4 | CC | Channel properties are modulated by cAMP and subunit assembly                                                                                   |
| N | Q9TUI4 | CC | Mediates the rapidly activating component of the delayed rectifying potassium current in heart (IKr) (By similarity).                           |
| N | Q9TUI4 | DE | Eag-related protein 1;                                                                                                                          |
| N | Q9TUI4 | DE | Ether-a-go-go-related gene potassium channel 1;                                                                                                 |
| N | Q9TUI4 | DE | Ether-a-go-go-related protein 1;                                                                                                                |
| N | Q9TUI4 | DE | Potassium voltage-gated channel subfamily H member 2;                                                                                           |
| N | Q9TUI4 | DE | Voltage-gated potassium channel subunit Kv11.1;                                                                                                 |
| N | Q9TUI4 | DR | voltage-gated potassium channel activity                                                                                                        |
| N | Q9TVD0 | CC | Important role in determination of the surface properties of the casein micelles (By similarity).                                               |
| N | Q9TVD0 | DE | Beta-casein;                                                                                                                                    |
| N | Q9TVD0 | DR | transporter activity                                                                                                                            |
| N | Q9TVU5 | CC | Protein transport                                                                                                                               |
| N | Q9TVU5 | CC | Probably involved in vesicular traffic from ER to Golgi (By similarity).                                                                        |
| N | Q9TVU5 | DE | Ras-related protein Rab-1;                                                                                                                      |
| N | Q9TVU5 | DE | Small GTP-binding protein rab1;                                                                                                                 |
| N | Q9TVU5 | DR | protein transport                                                                                                                               |
| N | Q9TVU5 | DR | small GTPase mediated signal transduction                                                                                                       |
| N | Q9TXD8 | CC | Peptide isomerase that inverts the chirality at the Ser- 81 of omega-Aga IVB                                                                    |
| N | Q9TXD8 | CC | Acts cofactor-independently.                                                                                                                    |
| N | Q9TXD8 | DE | Venom peptide isomerase heavy chain;                                                                                                            |
| N | Q9TXD8 | DR | isomerase activity                                                                                                                              |
| N | Q9TXD8 | DR | serine-type endopeptidase activity                                                                                                              |
| N | Q9U5Z8 | CC | Acts as a regulatory subunit of the 26 proteasome which is involved in the ATP-dependent degradation of ubiquitinated proteins (By similarity). |
| N | Q9U5Z8 | DE | 26S proteasome regulatory subunit RPN3;                                                                                                         |
| N | Q9U5Z8 | DE | 26S proteasome subunit S3;                                                                                                                      |
| N | Q9U5Z8 | DE | Diphenol oxidase A2 component;                                                                                                                  |
| N | Q9U5Z8 | DE | Probable 26S proteasome non-ATPase regulatory subunit 3;                                                                                        |
| N | Q9U5Z8 | DR | enzyme regulator activity                                                                                                                       |
| N | Q9U5Z8 | DR | regulation of protein catabolic process                                                                                                         |
| N | Q9U8Q4 | CC | Catalyzes the ADP ribosylation of double-stranded DNA by targeting the N2 amino group of dG residues                                            |
| N | Q9U8Q4 | CC | Induces apoptosis in a range of human cell lines.                                                                                               |
| N | Q9U8Q4 | DE | NAD--DNA ADP-ribosyltransferase;                                                                                                                |
| N | Q9U8Q4 | DR | DNA ADP-ribosylation                                                                                                                            |
| N | Q9U8Q4 | DR | NAD DNA ADP-ribosyltransferase activity                                                                                                         |
| N | Q9U8Q4 | DR | induction of apoptosis                                                                                                                          |
| N | Q9UBM7 | CC | Production of cholesterol by reduction of C7-C8 double bond of 7-dehydrocholesterol (7-DHC).                                                    |
| N | Q9UBM7 | DE | 7-DHC reductase;                                                                                                                                |
| N | Q9UBM7 | DE | 7-dehydrocholesterol reductase;                                                                                                                 |
| N | Q9UBM7 | DE | Putative sterol reductase SR-2;                                                                                                                 |
| N | Q9UBM7 | DE | Sterol Delta(7)-reductase;                                                                                                                      |
| N | Q9UBM7 | DR | 7-dehydrocholesterol reductase activity                                                                                                         |
| N | Q9UBM7 | DR | cholesterol biosynthetic process                                                                                                                |
| N | Q9UBM7 | DR | oxidation-reduction process                                                                                                                     |

|   |        |    |                                                                                                                                                                                                                |
|---|--------|----|----------------------------------------------------------------------------------------------------------------------------------------------------------------------------------------------------------------|
| N | Q9UBM7 | DR | protein binding                                                                                                                                                                                                |
| N | Q9UBQ5 | CC | Component of the eukaryotic translation initiation factor 3 (eIF-3) complex, which is required for several steps in the initiation of protein synthesis                                                        |
| N | Q9UBQ5 | CC | The eIF-3 complex associates with the 40S ribosome and facilitates the recruitment of eIF-1, eIF-1A, eIF-2:GTP:methionyl-tRNAi and eIF-5 to form the 43S preinitiation complex (43S PIC)                       |
| N | Q9UBQ5 | CC | The eIF-3 complex is also required for disassembly and recycling of posttermination ribosomal complexes and subsequently prevents premature joining of the 40S and 60S ribosomal subunits prior to initiation. |
| N | Q9UBQ5 | CC | The eIF-3 complex stimulates mRNA recruitment to the 43S PIC and scanning of the mRNA for AUG recognition                                                                                                      |
| N | Q9UBQ5 | DE | Eukaryotic translation initiation factor 3 subunit 12;                                                                                                                                                         |
| N | Q9UBQ5 | DE | Eukaryotic translation initiation factor 3 subunit K;                                                                                                                                                          |
| N | Q9UBQ5 | DE | Muscle-specific gene M9 protein;                                                                                                                                                                               |
| N | Q9UBQ5 | DR | protein binding                                                                                                                                                                                                |
| N | Q9UBQ5 | DR | regulation of translational initiation                                                                                                                                                                         |
| N | Q9UBQ5 | DR | ribosome binding                                                                                                                                                                                               |
| N | Q9UBQ5 | DR | translation initiation factor activity                                                                                                                                                                         |
| N | Q9UGU5 | CC | Negatively regulates Wnt/beta-catenin signaling during development (By similarity)                                                                                                                             |
| N | Q9UGU5 | DE | HMG box-containing protein 4;                                                                                                                                                                                  |
| N | Q9UGU5 | DE | HMG domain-containing protein 4;                                                                                                                                                                               |
| N | Q9UGU5 | DE | High mobility group protein 2-like 1;                                                                                                                                                                          |
| N | Q9UGU5 | DE | Protein HMGBG;                                                                                                                                                                                                 |
| N | Q9UGU5 | DR | Wnt receptor signaling pathway                                                                                                                                                                                 |
| N | Q9UGU5 | DR | endosome to lysosome transport                                                                                                                                                                                 |
| N | Q9UGU5 | DR | negative regulation of Wnt receptor signaling pathway                                                                                                                                                          |
| N | Q9UHI8 | CC | Cleaves aggrecan, a cartilage proteoglycan, and may be involved in its turnover (By similarity)                                                                                                                |
| N | Q9UHI8 | CC | Active metalloprotease, which may be associated with various inflammatory processes as well as development of cancer cachexia                                                                                  |
| N | Q9UHI8 | CC | Has angiogenic inhibitor activity                                                                                                                                                                              |
| N | Q9UHI8 | CC | May play a critical role in follicular rupture.                                                                                                                                                                |
| N | Q9UHI8 | DE | A disintegrin and metalloproteinase with thrombospondin motifs 1;                                                                                                                                              |
| N | Q9UHI8 | DR | heparin binding                                                                                                                                                                                                |
| N | Q9UHI8 | DR | integrin-mediated signaling pathway                                                                                                                                                                            |
| N | Q9UHI8 | DR | negative regulation of cell proliferation                                                                                                                                                                      |
| N | Q9UHI8 | DR | zinc ion binding                                                                                                                                                                                               |
| N | Q9UHX3 | CC | Receptor probably involved in cell attachment.                                                                                                                                                                 |
| N | Q9UHX3 | DE | CD312;                                                                                                                                                                                                         |
| N | Q9UHX3 | DE | EGF-like module receptor 2;                                                                                                                                                                                    |
| N | Q9UHX3 | DE | EGF-like module-containing mucin-like hormone receptor-like 2;                                                                                                                                                 |
| N | Q9UHX3 | DR | G-protein coupled receptor activity                                                                                                                                                                            |
| N | Q9UHX3 | DR | calcium ion binding                                                                                                                                                                                            |
| N | Q9UHX3 | DR | cell adhesion                                                                                                                                                                                                  |
| N | Q9UHX3 | DR | neuropeptide signaling pathway                                                                                                                                                                                 |
| N | Q9UKC9 | CC | Probably recognizes and binds to some phosphorylated proteins and promotes their ubiquitination and degradation                                                                                                |
| N | Q9UKC9 | CC | Binds to hepatitis C virus non-structural protein 5A (NS5A) in a reaction crucial for hepatitis C virus RNA replication.                                                                                       |
| N | Q9UKC9 | DE | F-box and leucine-rich repeat protein 2;                                                                                                                                                                       |
| N | Q9UKC9 | DE | F-box protein FBL2/FBL3;                                                                                                                                                                                       |
| N | Q9UKC9 | DE | F-box/LRR-repeat protein 2;                                                                                                                                                                                    |
| N | Q9UKC9 | DR | interspecies interaction between organisms                                                                                                                                                                     |
| N | Q9UKC9 | DR | ubiquitin-protein ligase activity                                                                                                                                                                              |
| N | Q9ULC3 | DE | Ras-related protein Rab-23;                                                                                                                                                                                    |
| N | Q9ULC3 | DR | protein transport                                                                                                                                                                                              |
| N | Q9ULC3 | DR | small GTPase mediated signal transduction                                                                                                                                                                      |
| N | Q9UPR6 | DE | Zinc finger RNA-binding protein 2;                                                                                                                                                                             |
| N | Q9UPR6 | DR | nucleic acid binding                                                                                                                                                                                           |
| N | Q9UPR6 | DR | zinc ion binding                                                                                                                                                                                               |
| N | Q9UQ88 | CC | Appears to play multiple roles in cell cycle progression, cytokinesis and apoptosis                                                                                                                            |
| N | Q9UQ88 | CC | The p110 isoforms have been suggested to be involved in pre-mRNA splicing, potentially by phosphorylating the splicing protein SFRS7                                                                           |
| N | Q9UQ88 | CC | The p58 isoform may act as a negative regulator of normal cell cycle progression.                                                                                                                              |
| N | Q9UQ88 | DE | Cell division cycle 2-like protein kinase 2;                                                                                                                                                                   |

|   |        |    |                                                                                                                                      |
|---|--------|----|--------------------------------------------------------------------------------------------------------------------------------------|
| N | Q9UQ88 | DE | Cell division protein kinase 11A;                                                                                                    |
| N | Q9UQ88 | DE | Cyclin-dependent kinase 11A;                                                                                                         |
| N | Q9UQ88 | DE | Galactosyltransferase-associated protein kinase p58/GTA;                                                                             |
| N | Q9UQ88 | DE | PITSLRE serine/threonine-protein kinase CDC2L2;                                                                                      |
| N | Q9UQ88 | DR | cyclin-dependent protein kinase activity                                                                                             |
| N | Q9UQ88 | DR | protein binding                                                                                                                      |
| N | Q9UQ88 | DR | protein phosphorylation                                                                                                              |
| N | Q9UQ88 | DR | regulation of cell growth                                                                                                            |
| N | Q9UQ88 | DR | regulation of mRNA processing                                                                                                        |
| N | Q9UQ88 | DR | regulation of transcription, DNA-dependent                                                                                           |
| N | Q9US09 | CC | Involved in vacuolar transport and vacuole pH homeostasis                                                                            |
| N | Q9US09 | CC | Also required for cytokinesis.                                                                                                       |
| N | Q9US09 | DE | Protein btn1;                                                                                                                        |
| N | Q9US09 | DR | actin cortical patch localization                                                                                                    |
| N | Q9US09 | DR | amino acid transport                                                                                                                 |
| N | Q9US09 | DR | cellular protein localization                                                                                                        |
| N | Q9US09 | DR | cellular response to heat                                                                                                            |
| N | Q9US09 | DR | late endosome to vacuole transport                                                                                                   |
| N | Q9US09 | DR | membrane raft distribution                                                                                                           |
| N | Q9US09 | DR | regulation of cell cycle cytokinesis                                                                                                 |
| N | Q9US09 | DR | vacuolar acidification                                                                                                               |
| N | Q9US09 | DR | vacuole organization                                                                                                                 |
| N | Q9UT27 | CC | Involved in cell wall biogenesis                                                                                                     |
| N | Q9UT27 | CC | Has a role in the addition of Gal-beta1,3 moieties to galactomannans and their subsequent pyruvylation.                              |
| N | Q9UT27 | DE | PvGal synthesis protein 1;                                                                                                           |
| N | Q9UT27 | DE | Pyruvyl transferase 1;                                                                                                               |
| N | Q9UT27 | DE | Pyruvylated Gal-beta-1,3-epitope synthesis protein 1;                                                                                |
| N | Q9UT27 | DR | 4,6-pyruvylated galactose residue biosynthetic process                                                                               |
| N | Q9UT27 | DR | cellular cell wall organization                                                                                                      |
| N | Q9UT27 | DR | fungal-type cell wall biogenesis                                                                                                     |
| N | Q9UT27 | DR | pyruvyltransferase activity                                                                                                          |
| N | Q9UTB5 | CC | May be involved in the regulation of phospholipid biosynthesis and interorganelle trafficking of phosphatidylserine (By similarity). |
| N | Q9UTB5 | DE | Phosphatidylserine decarboxylase 1 alpha chain;                                                                                      |
| N | Q9UTB5 | DE | Phosphatidylserine decarboxylase 1 beta chain;                                                                                       |
| N | Q9UTB5 | DE | Phosphatidylserine decarboxylase proenzyme 1, mitochondrial;                                                                         |
| N | Q9UTB5 | DR | phosphatidylethanolamine biosynthetic process                                                                                        |
| N | Q9UTB5 | DR | phosphatidylserine decarboxylase activity                                                                                            |
| N | Q9UTB5 | DR | regulation of cell cycle cytokinesis                                                                                                 |
| N | Q9UTB5 | DR | regulation of cell shape                                                                                                             |
| N | Q9UU82 | DE | Probable sterol O-acyltransferase 2;                                                                                                 |
| N | Q9UU82 | DE | Sterol-ester synthase 2;                                                                                                             |
| N | Q9UU82 | DR | cholesterol O-acyltransferase activity                                                                                               |
| N | Q9UUD8 | DE | Uncharacterized peptidase C18A7.01;                                                                                                  |
| N | Q9UUD8 | DR | cellular process                                                                                                                     |
| N | Q9UUD8 | DR | metal ion binding                                                                                                                    |
| N | Q9UUD8 | DR | metalloexopeptidase activity                                                                                                         |
| N | Q9UUF3 | DE | Probable tyrosine-protein phosphatase C17A3.03c;                                                                                     |
| N | Q9UUF3 | DR | protein tyrosine phosphatase activity                                                                                                |
| N | Q9UUF3 | DR | signal transduction                                                                                                                  |
| N | Q9UWW8 | CC | Produces ATP from ADP in the presence of a proton gradient across the membrane.                                                      |
| N | Q9UWW8 | CC | The archaeal beta chain is a regulatory subunit.                                                                                     |
| N | Q9UWW8 | DE | V-ATPase subunit B;                                                                                                                  |
| N | Q9UWW8 | DE | V-type ATP synthase beta chain;                                                                                                      |
| N | Q9UWW8 | DR | ATP hydrolysis coupled proton transport                                                                                              |
| N | Q9UWW8 | DR | ATP synthesis coupled proton transport                                                                                               |
| N | Q9UWW8 | DR | hydrogen ion transporting ATP synthase activity, rotational mechanism                                                                |
| N | Q9UWW8 | DR | proton-transporting ATPase activity, rotational mechanism                                                                            |
| N | Q9UWX9 | DE | Acetohydroxy-acid isomeroreductase 1;                                                                                                |
| N | Q9UWX9 | DE | Alpha-keto-beta-hydroxylacil reductoisomerase 1;                                                                                     |
| N | Q9UWX9 | DE | Ketol-acid reductoisomerase 1;                                                                                                       |
| N | Q9UWX9 | DR | branched chain family amino acid biosynthetic process                                                                                |
| N | Q9UWX9 | DR | coenzyme binding                                                                                                                     |
| N | Q9UWX9 | DR | ketol-acid reductoisomerase activity                                                                                                 |

|   |        |    |                                                                                                                                                                                 |
|---|--------|----|---------------------------------------------------------------------------------------------------------------------------------------------------------------------------------|
| N | Q9UWX9 | DR | oxidation-reduction process                                                                                                                                                     |
| N | Q9V1F8 | DE | Intracellular protease 1;                                                                                                                                                       |
| N | Q9V1F8 | DE | Intracellular protease I;                                                                                                                                                       |
| N | Q9V1F8 | DR | hydrolase activity, acting on glycosyl bonds                                                                                                                                    |
| N | Q9V1F8 | DR | peptidase activity                                                                                                                                                              |
| N | Q9V3J8 | CC | Essential for viability.                                                                                                                                                        |
| N | Q9V3J8 | DE | Protein will die slowly;                                                                                                                                                        |
| N | Q9V629 | CC | Involved in the rasiRNA pathway and most likely acts downstream of siRNA biogenesis.                                                                                            |
| N | Q9V629 | DE | Protein cutoff;                                                                                                                                                                 |
| N | Q9V629 | DR | dorsal/ventral pattern formation                                                                                                                                                |
| N | Q9V629 | DR | germarium-derived female germ-line cyst formation                                                                                                                               |
| N | Q9V629 | DR | karyosome formation                                                                                                                                                             |
| N | Q9V629 | DR | ovarian fusome organization                                                                                                                                                     |
| N | Q9V629 | DR | production of siRNA involved in RNA interference                                                                                                                                |
| N | Q9V629 | DR | protein binding                                                                                                                                                                 |
| N | Q9V6H2 | CC | Complexes with Or83b to form odorant-sensing units, providing sensitive and prolonged odorant signaling and calcium permeability                                                |
| N | Q9V6H2 | CC | They are necessary and sufficient to promote functional reconstruction of odor-evoked signaling in sensory neurons that normally respond only to carbon dioxide (By similarity) |
| N | Q9V6H2 | DE | Odorant receptor 49b;                                                                                                                                                           |
| N | Q9V6H2 | DR | odorant binding                                                                                                                                                                 |
| N | Q9V6H2 | DR | olfactory receptor activity                                                                                                                                                     |
| N | Q9V6H2 | DR | sensory perception of smell                                                                                                                                                     |
| N | Q9V8K2 | CC | Component of the exocyst complex involved in the docking of exocytic vesicles with fusion sites on the plasma membrane.                                                         |
| N | Q9V8K2 | DE | Exocyst complex component 3;                                                                                                                                                    |
| N | Q9V8K2 | DE | Exocyst complex component Sec6;                                                                                                                                                 |
| N | Q9V8K2 | DR | border follicle cell migration                                                                                                                                                  |
| N | Q9V8K2 | DR | instar larval development                                                                                                                                                       |
| N | Q9V8K2 | DR | photoreceptor cell maintenance                                                                                                                                                  |
| N | Q9V8K2 | DR | photoreceptor cell morphogenesis                                                                                                                                                |
| N | Q9V8K2 | DR | plasma membrane organization                                                                                                                                                    |
| N | Q9V8K2 | DR | positive regulation of exocytosis                                                                                                                                               |
| N | Q9V8K2 | DR | protein binding                                                                                                                                                                 |
| N | Q9V8K2 | DR | protein transport                                                                                                                                                               |
| N | Q9V8K2 | DR | rhabdomere membrane biogenesis                                                                                                                                                  |
| N | Q9V8K2 | DR | synaptic vesicle docking involved in exocytosis                                                                                                                                 |
| N | Q9V8K2 | DR | synaptic vesicle targeting                                                                                                                                                      |
| N | Q9VD51 | CC | Probable RNA-dependent helicase                                                                                                                                                 |
| N | Q9VD51 | CC | Functions in cell growth and proliferation                                                                                                                                      |
| N | Q9VD51 | CC | may have a role in ribosome biogenesis and, consequently, in protein biogenesis                                                                                                 |
| N | Q9VD51 | DE | Probable ATP-dependent RNA helicase pitchouné;                                                                                                                                  |
| N | Q9VD51 | DR | ATP-dependent helicase activity                                                                                                                                                 |
| N | Q9VEJ2 | CC | Involved in nucleolar processing of pre-18S ribosomal RNA                                                                                                                       |
| N | Q9VEJ2 | CC | Has a role in the nuclear export of 40S pre-ribosomal subunit to the cytoplasm (By similarity).                                                                                 |
| N | Q9VEJ2 | DE | Nucleolar complex protein 14 homolog;                                                                                                                                           |
| N | Q9VEJ2 | DE | Nucleolar protein 14 homolog;                                                                                                                                                   |
| N | Q9VEJ2 | DR | protein binding                                                                                                                                                                 |
| N | Q9VEJ2 | DR | rRNA processing                                                                                                                                                                 |
| N | Q9VEJ2 | DR | ribosomal small subunit biogenesis                                                                                                                                              |
| N | Q9VEJ2 | DR | snoRNA binding                                                                                                                                                                  |
| N | Q9VEP1 | CC | Probable methyltransferase (By similarity).                                                                                                                                     |
| N | Q9VEP1 | DE | Putative ribosomal RNA methyltransferase CG5220;                                                                                                                                |
| N | Q9VEP1 | DE | rRNA (uridine-2'-O-)-methyltransferase;                                                                                                                                         |
| N | Q9VEP1 | DR | methyltransferase activity                                                                                                                                                      |
| N | Q9VEP1 | DR | nucleic acid binding                                                                                                                                                            |
| N | Q9VEP1 | DR | protein binding                                                                                                                                                                 |
| N | Q9VEP1 | DR | rRNA methylation                                                                                                                                                                |
| N | Q9VH19 | CC | Essential for the coordination of mitotic progression, and also plays a role in cell migration.                                                                                 |
| N | Q9VH19 | DE | Invadolysin;                                                                                                                                                                    |
| N | Q9VH19 | DE | Leishmanolysin-like peptidase;                                                                                                                                                  |
| N | Q9VH19 | DR | brain development                                                                                                                                                               |

|   |        |    |                                                                                                                                                                                                                                         |
|---|--------|----|-----------------------------------------------------------------------------------------------------------------------------------------------------------------------------------------------------------------------------------------|
| N | Q9VH19 | DR | cell adhesion                                                                                                                                                                                                                           |
| N | Q9VH19 | DR | cell division                                                                                                                                                                                                                           |
| N | Q9VH19 | DR | centrosome duplication                                                                                                                                                                                                                  |
| N | Q9VH19 | DR | chromatin remodeling                                                                                                                                                                                                                    |
| N | Q9VH19 | DR | germ cell migration                                                                                                                                                                                                                     |
| N | Q9VH19 | DR | gonad development                                                                                                                                                                                                                       |
| N | Q9VH19 | DR | imaginal disc development                                                                                                                                                                                                               |
| N | Q9VH19 | DR | metalloendopeptidase activity                                                                                                                                                                                                           |
| N | Q9VH19 | DR | mitotic centrosome separation                                                                                                                                                                                                           |
| N | Q9VH19 | DR | mitotic chromosome condensation                                                                                                                                                                                                         |
| N | Q9VH19 | DR | mitotic spindle organization                                                                                                                                                                                                            |
| N | Q9VH19 | DR | positive regulation of mitotic metaphase/anaphase transition                                                                                                                                                                            |
| N | Q9VH19 | DR | zinc ion binding                                                                                                                                                                                                                        |
| N | Q9VIM5 | CC | Functions as actin-binding component of the Arp2/3 complex which is involved in regulation of actin polymerization and together with an activating nucleation-promoting factor (NPF) mediates the formation of branched actin networks  |
| N | Q9VIM5 | CC | Seems to contact the mother actin filament (By similarity).                                                                                                                                                                             |
| N | Q9VIM5 | DE | Arp2/3 complex 34 kDa subunit;                                                                                                                                                                                                          |
| N | Q9VIM5 | DE | Probable actin-related protein 2/3 complex subunit 2;                                                                                                                                                                                   |
| N | Q9VIM5 | DR | actin binding                                                                                                                                                                                                                           |
| N | Q9VIM5 | DR | cell projection assembly                                                                                                                                                                                                                |
| N | Q9VIM5 | DR | cortical actin cytoskeleton organization                                                                                                                                                                                                |
| N | Q9VIM5 | DR | regulation of actin filament polymerization                                                                                                                                                                                             |
| N | Q9VIM5 | DR | regulation of cell shape                                                                                                                                                                                                                |
| N | Q9VMV6 | DE | SelT-like protein;                                                                                                                                                                                                                      |
| N | Q9VMV6 | DR | cell redox homeostasis                                                                                                                                                                                                                  |
| N | Q9VMV6 | DR | selenium binding                                                                                                                                                                                                                        |
| N | Q9VP22 | CC | Cyclin-dependent kinase which displays CTD kinase activity; hyperphosphorylates the C-terminal heptapeptide repeat domain (CTD) of the largest RNA polymerase II subunit, thereby acting as a key regulator of transcription elongation |
| N | Q9VP22 | DE | Cell division protein kinase 12;                                                                                                                                                                                                        |
| N | Q9VP22 | DE | Cyclin-dependent kinase 12;                                                                                                                                                                                                             |
| N | Q9VP22 | DR | RNA polymerase II carboxy-terminal domain kinase activity                                                                                                                                                                               |
| N | Q9VP22 | DR | cyclin binding                                                                                                                                                                                                                          |
| N | Q9VP22 | DR | cyclin-dependent protein kinase activity                                                                                                                                                                                                |
| N | Q9VP22 | DR | phagocytosis, engulfment                                                                                                                                                                                                                |
| N | Q9VP22 | DR | phosphorylation of RNA polymerase II C-terminal domain                                                                                                                                                                                  |
| N | Q9W0Y6 | CC | Receptor-activated non-selective cation channel involved in detection of pain sensation due to high temperature                                                                                                                         |
| N | Q9W0Y6 | CC | Involved in heat nociception by being activated by noxious temperature of 38 degrees Celsius.                                                                                                                                           |
| N | Q9W0Y6 | DE | Transient receptor potential cation channel protein painless;                                                                                                                                                                           |
| N | Q9W0Y6 | DR | behavioral response to pain                                                                                                                                                                                                             |
| N | Q9W0Y6 | DR | detection of mechanical stimulus involved in sensory perception of pain                                                                                                                                                                 |
| N | Q9W0Y6 | DR | detection of temperature stimulus involved in sensory perception of pain                                                                                                                                                                |
| N | Q9W0Y6 | DR | feeding behavior                                                                                                                                                                                                                        |
| N | Q9W0Y6 | DR | ion channel activity                                                                                                                                                                                                                    |
| N | Q9W0Y6 | DR | negative gravitaxis                                                                                                                                                                                                                     |
| N | Q9W0Y6 | DR | regulation of female receptivity                                                                                                                                                                                                        |
| N | Q9W0Y6 | DR | response to heat                                                                                                                                                                                                                        |
| N | Q9W3C0 | CC | Involved in nucleolar processing of pre-18S ribosomal RNA (By similarity).                                                                                                                                                              |
| N | Q9W3C0 | DE | Probable U3 small nucleolar RNA-associated protein 11;                                                                                                                                                                                  |
| N | Q9W3C0 | DE | U3 snoRNA-associated protein 11;                                                                                                                                                                                                        |
| N | Q9W3C0 | DR | rRNA processing                                                                                                                                                                                                                         |
| N | Q9W7J6 | CC | Lethal neurotoxin, binds and inhibits neuronal nicotinic acetylcholine receptors (nAChR) (By similarity).                                                                                                                               |
| N | Q9W7J6 | DE | Alpha-neurotoxin 7;                                                                                                                                                                                                                     |
| N | Q9W7J6 | DE | Short neurotoxin 7;                                                                                                                                                                                                                     |
| N | Q9W7J6 | DR | acetylcholine receptor inhibitor activity                                                                                                                                                                                               |
| N | Q9W7J6 | DR | synaptic transmission                                                                                                                                                                                                                   |
| N | Q9WUQ3 | CC | Promotes formation and maturation of oligodendrocytes, especially within the brain                                                                                                                                                      |
| N | Q9WUQ3 | CC | Cooperates with OLIG2 to establish the pMN domain of the embryonic neural tube (By similarity).                                                                                                                                         |
| N | Q9WUQ3 | DE | Olig-1 bHLH protein;                                                                                                                                                                                                                    |
| N | Q9WUQ3 | DE | Oligodendrocyte transcription factor 1;                                                                                                                                                                                                 |

|   |        |    |                                                                                                                                                                                                |
|---|--------|----|------------------------------------------------------------------------------------------------------------------------------------------------------------------------------------------------|
| N | Q9WUQ3 | DR | transcription regulator activity                                                                                                                                                               |
| N | Q9WYZ1 | CC | Protease subunit of a proteasome-like degradation complex believed to be a general protein degrading machinery.                                                                                |
| N | Q9WYZ1 | DE | ATP-dependent protease subunit HslV;                                                                                                                                                           |
| N | Q9WYZ1 | DR | metal ion binding                                                                                                                                                                              |
| N | Q9WYZ1 | DR | proteolysis involved in cellular protein catabolic process                                                                                                                                     |
| N | Q9WYZ1 | DR | threonine-type endopeptidase activity                                                                                                                                                          |
| N | Q9WZ25 | CC | Catalyzes the isomerization between 2-isopropylmalate and 3-isopropylmalate, via the formation of 2-isopropylmaleate.                                                                          |
| N | Q9WZ25 | DE | 3-isopropylmalate dehydratase small subunit 2;                                                                                                                                                 |
| N | Q9WZ25 | DE | Alpha-IPM isomerase 2;                                                                                                                                                                         |
| N | Q9WZ25 | DE | Isopropylmalate isomerase 2;                                                                                                                                                                   |
| N | Q9WZ25 | DR | 3-isopropylmalate dehydratase activity                                                                                                                                                         |
| N | Q9WZ25 | DR | leucine biosynthetic process                                                                                                                                                                   |
| N | Q9WZN3 | CC | One of the essential components for the initiation of protein synthesis                                                                                                                        |
| N | Q9WZN3 | CC | Also involved in the hydrolysis of GTP during the formation of the 70S ribosomal complex (By similarity).                                                                                      |
| N | Q9WZN3 | CC | Protects formylmethionyl-tRNA from spontaneous hydrolysis and promotes its binding to the 30S ribosomal subunits                                                                               |
| N | Q9WZN3 | DE | Translation initiation factor IF-2;                                                                                                                                                            |
| N | Q9WZN3 | DR | GTPase activity                                                                                                                                                                                |
| N | Q9WZN3 | DR | translation initiation factor activity                                                                                                                                                         |
| N | Q9X1K5 | DE | DAP decarboxylase;                                                                                                                                                                             |
| N | Q9X1K5 | DE | Diaminopimelate decarboxylase;                                                                                                                                                                 |
| N | Q9X1K5 | DR | diaminopimelate decarboxylase activity                                                                                                                                                         |
| N | Q9X1K5 | DR | lysine biosynthetic process via diaminopimelate                                                                                                                                                |
| N | Q9X521 | CC | Binds directly to 23S rRNA                                                                                                                                                                     |
| N | Q9X521 | CC | The L1 stalk is quite mobile in the ribosome, and is involved in E site tRNA release (By similarity).                                                                                          |
| N | Q9X521 | DE | 50S ribosomal protein L1;                                                                                                                                                                      |
| N | Q9X521 | DR | RNA processing                                                                                                                                                                                 |
| N | Q9X521 | DR | regulation of translation                                                                                                                                                                      |
| N | Q9X521 | DR | structural constituent of ribosome                                                                                                                                                             |
| N | Q9XDB4 | CC | Catalyzes the attachment of isoleucine to tRNA(Ile)                                                                                                                                            |
| N | Q9XDB4 | CC | As IleRS can inadvertently accommodate and process structurally similar amino acids such as valine, to avoid such errors it has two additional distinct tRNA(Ile)-dependent editing activities |
| N | Q9XDB4 | CC | One activity is designated as 'pretransfer' editing and involves the hydrolysis of activated Val-AMP                                                                                           |
| N | Q9XDB4 | CC | The other activity is designated 'posttransfer' editing and involves deacylation of mischarged Val-tRNA(Ile) (By similarity).                                                                  |
| N | Q9XDB4 | DE | Isoleucine--tRNA ligase;                                                                                                                                                                       |
| N | Q9XDB4 | DE | Isoleucyl-tRNA synthetase;                                                                                                                                                                     |
| N | Q9XDB4 | DR | isoleucine-tRNA ligase activity                                                                                                                                                                |
| N | Q9XDB4 | DR | isoleucyl-tRNA aminoacylation                                                                                                                                                                  |
| N | Q9XDB4 | DR | metal ion binding                                                                                                                                                                              |
| N | Q9XG56 | CC | Core component of nucleosome                                                                                                                                                                   |
| N | Q9XG56 | CC | DNA accessibility is regulated via a complex set of post-translational modifications of histones, also called histone code, and nucleosome remodeling.                                         |
| N | Q9XG56 | CC | Histones thereby play a central role in transcription regulation, DNA repair, DNA replication and chromosomal stability                                                                        |
| N | Q9XG56 | CC | Nucleosomes wrap and compact DNA into chromatin, limiting DNA accessibility to the cellular machineries which require DNA as a template                                                        |
| N | Q9XG56 | DE | Histone H2A.1;                                                                                                                                                                                 |
| N | Q9XG56 | DR | nucleosome assembly                                                                                                                                                                            |
| N | Q9XH37 | CC | Probable transcription activator that binds to the DNA sequence 5'-CAATATGATTC-3'                                                                                                              |
| N | Q9XH37 | CC | May be involved in the regulation of gibberellin signaling.                                                                                                                                    |
| N | Q9XH37 | DE | HD-ZIP protein HOX4;                                                                                                                                                                           |
| N | Q9XH37 | DE | Homeobox-leucine zipper protein HOX4;                                                                                                                                                          |
| N | Q9XH37 | DE | Homeodomain transcription factor HOX4;                                                                                                                                                         |
| N | Q9XH37 | DR | regulation of transcription, DNA-dependent                                                                                                                                                     |
| N | Q9XH37 | DR | sequence-specific DNA binding                                                                                                                                                                  |
| N | Q9XH37 | DR | sequence-specific DNA binding transcription factor activity                                                                                                                                    |
| N | Q9XH37 | DR | transcription regulator activity                                                                                                                                                               |

|   |        |    |                                                                                                                                                                                                                                                  |
|---|--------|----|--------------------------------------------------------------------------------------------------------------------------------------------------------------------------------------------------------------------------------------------------|
| N | Q9XP34 | CC | Component of the ubiquinol-cytochrome c reductase complex (complex III or cytochrome b-c1 complex), which is a respiratory chain that generates an electrochemical potential coupled to ATP synthesis (By similarity).                           |
| N | Q9XP34 | DE | Complex III subunit 3;                                                                                                                                                                                                                           |
| N | Q9XP34 | DE | Complex III subunit III;                                                                                                                                                                                                                         |
| N | Q9XP34 | DE | Cytochrome b-c1 complex subunit 3;                                                                                                                                                                                                               |
| N | Q9XP34 | DE | Cytochrome b;                                                                                                                                                                                                                                    |
| N | Q9XP34 | DE | Ubiquinol-cytochrome-c reductase complex cytochrome b subunit;                                                                                                                                                                                   |
| N | Q9XP34 | DR | electron carrier activity                                                                                                                                                                                                                        |
| N | Q9XP34 | DR | metal ion binding                                                                                                                                                                                                                                |
| N | Q9XP34 | DR | oxidoreductase activity                                                                                                                                                                                                                          |
| N | Q9XP34 | DR | respiratory electron transport chain                                                                                                                                                                                                             |
| N | Q9XT49 | CC | Serotonin transporter whose primary function in the central nervous system involves the regulation of serotonergic signaling via transport of serotonin molecules from the synaptic cleft back into the pre-synaptic terminal for re-utilization |
| N | Q9XT49 | CC | Plays a key role in mediating regulation of the availability of serotonin to other receptors of serotonergic systems                                                                                                                             |
| N | Q9XT49 | CC | Terminates the action of serotonin and recycles it in a sodium-dependent manner (By similarity).                                                                                                                                                 |
| N | Q9XT49 | DE | 5HT transporter;                                                                                                                                                                                                                                 |
| N | Q9XT49 | DE | Sodium-dependent serotonin transporter;                                                                                                                                                                                                          |
| N | Q9XT49 | DE | Solute carrier family 6 member 4;                                                                                                                                                                                                                |
| N | Q9XT49 | DR | actin filament binding                                                                                                                                                                                                                           |
| N | Q9XT49 | DR | protein oligomerization                                                                                                                                                                                                                          |
| N | Q9XT49 | DR | serotonin transmembrane transporter activity                                                                                                                                                                                                     |
| N | Q9XT49 | DR | serotonin uptake                                                                                                                                                                                                                                 |
| N | Q9XT49 | DR | serotonin:sodium symporter activity                                                                                                                                                                                                              |
| N | Q9XXC8 | CC | Catalyzes the reduction of trans-2-enoyl-CoA to acyl- CoA                                                                                                                                                                                        |
| N | Q9XXC8 | CC | May have a role in the mitochondrial synthesis of fatty acids (By similarity).                                                                                                                                                                   |
| N | Q9XXC8 | DE | Probable trans-2-enoyl-CoA reductase 2, mitochondrial;                                                                                                                                                                                           |
| N | Q9XXC8 | DR | fatty acid biosynthetic process                                                                                                                                                                                                                  |
| N | Q9XXC8 | DR | oxidation-reduction process                                                                                                                                                                                                                      |
| N | Q9XXC8 | DR | protein binding                                                                                                                                                                                                                                  |
| N | Q9XXC8 | DR | trans-2-enoyl-CoA reductase (NADPH) activity                                                                                                                                                                                                     |
| N | Q9XXC8 | DR | zinc ion binding                                                                                                                                                                                                                                 |
| N | Q9Y1U3 | CC | Depressant insect beta-toxins cause a transient contraction paralysis followed by a slow flaccid paralysis                                                                                                                                       |
| N | Q9Y1U3 | CC | They bind voltage-independently at site-4 of sodium channels and shift the voltage of activation toward more negative potentials thereby affecting sodium channel activation and promoting spontaneous and repetitive firing (By similarity)     |
| N | Q9Y1U3 | DE | Toxin BmKITc;                                                                                                                                                                                                                                    |
| N | Q9Y1U3 | DR | defense response                                                                                                                                                                                                                                 |
| N | Q9Y1U3 | DR | sodium channel inhibitor activity                                                                                                                                                                                                                |
| N | Q9Y2T7 | CC | Major constituent of messenger ribonucleoprotein particles (mRNPs)                                                                                                                                                                               |
| N | Q9Y2T7 | CC | Binds to Y-box consensus promoter element                                                                                                                                                                                                        |
| N | Q9Y2T7 | CC | Binds to full length mRNA with high affinity in a sequence-independent manner                                                                                                                                                                    |
| N | Q9Y2T7 | CC | Binds to short RNA sequences containing the consensus site 5'-UCCAUCA-3' with low affinity and limited sequence specificity                                                                                                                      |
| N | Q9Y2T7 | CC | Involved in the regulation of the stability and/or translation of germ cell mRNAs                                                                                                                                                                |
| N | Q9Y2T7 | CC | Its binding with maternal mRNAs is necessary for its cytoplasmic retention                                                                                                                                                                       |
| N | Q9Y2T7 | CC | May mark specific mRNAs (those transcribed from Y-box promoters) in the nucleus for cytoplasmic storage, thereby linking transcription and mRNA storage/translational delay (By similarity).                                                     |
| N | Q9Y2T7 | DE | DNA-binding protein C;                                                                                                                                                                                                                           |
| N | Q9Y2T7 | DE | Germ cell-specific Y-box-binding protein;                                                                                                                                                                                                        |
| N | Q9Y2T7 | DE | MSY2 homolog;                                                                                                                                                                                                                                    |
| N | Q9Y2T7 | DE | Y-box-binding protein 2;                                                                                                                                                                                                                         |
| N | Q9Y2T7 | DR | regulation of transcription, DNA-dependent                                                                                                                                                                                                       |
| N | Q9Y2T7 | DR | transcription from RNA polymerase II promoter                                                                                                                                                                                                    |
| N | Q9Y2T7 | DR | translational attenuation                                                                                                                                                                                                                        |
| N | Q9Y3Q8 | CC | Transcriptional repressor.                                                                                                                                                                                                                       |
| N | Q9Y3Q8 | DE | TSC22 domain family protein 4;                                                                                                                                                                                                                   |
| N | Q9Y3Q8 | DE | TSC22-related-inducible leucine zipper protein 2;                                                                                                                                                                                                |
| N | Q9Y3Q8 | DE | Tsc-22-like protein THG-1;                                                                                                                                                                                                                       |
| N | Q9Y3Q8 | DR | protein binding                                                                                                                                                                                                                                  |



|   |        |    |                                                                                                                                                                                       |
|---|--------|----|---------------------------------------------------------------------------------------------------------------------------------------------------------------------------------------|
| N | Q9Y3Q8 | DR | regulation of transcription, DNA-dependent                                                                                                                                            |
| N | Q9Y3Q8 | DR | sequence-specific DNA binding transcription factor activity                                                                                                                           |
| N | Q9Y3Q8 | DR | transcription repressor activity                                                                                                                                                      |
| N | Q9Y4U1 | CC | may be involved in the binding and intracellular trafficking of cobalamin (vitamin B12)                                                                                               |
| N | Q9Y4U1 | DE | Methylmalonic aciduria and homocystinuria type C protein;                                                                                                                             |
| N | Q9Y4U1 | DR | cobalamin binding                                                                                                                                                                     |
| N | Q9Y5H6 | CC | Potential calcium-dependent cell-adhesion protein                                                                                                                                     |
| N | Q9Y5H6 | CC | May be involved in the establishment and maintenance of specific neuronal connections in the brain.                                                                                   |
| N | Q9Y5H6 | DE | PCDH-alpha-8;                                                                                                                                                                         |
| N | Q9Y5H6 | DE | Protocadherin alpha-8;                                                                                                                                                                |
| N | Q9Y5H6 | DR | calcium ion binding                                                                                                                                                                   |
| N | Q9Y5H6 | DR | homophilic cell adhesion                                                                                                                                                              |
| N | Q9Y5H6 | DR | nervous system development                                                                                                                                                            |
| N | Q9Y5H6 | DR | protein binding                                                                                                                                                                       |
| N | Q9Y5M8 | CC | Component of the SRP (signal recognition particle) receptor                                                                                                                           |
| N | Q9Y5M8 | CC | Ensures, in conjunction with the signal recognition particle, the correct targeting of the nascent secretory proteins to the endoplasmic reticulum membrane system                    |
| N | Q9Y5M8 | CC | Has GTPase activity                                                                                                                                                                   |
| N | Q9Y5M8 | CC | May mediate the membrane association of SRPR (By similarity).                                                                                                                         |
| N | Q9Y5M8 | DE | Protein APMCF1;                                                                                                                                                                       |
| N | Q9Y5M8 | DE | Signal recognition particle receptor subunit beta;                                                                                                                                    |
| N | Q9Y5M8 | DR | protein binding                                                                                                                                                                       |
| N | Q9Y5M8 | DR | receptor activity                                                                                                                                                                     |
| N | Q9Y5U9 | CC | May be involved in protein transport between endoplasmic reticulum and Golgi apparatus (By similarity).                                                                               |
| N | Q9Y5U9 | DE | Immediate early response 3-interacting protein 1;                                                                                                                                     |
| N | Q9Y6Z5 | DE | Protein HGC6.4;                                                                                                                                                                       |
| N | Q9Y6Z5 | DE | Putative uncharacterized protein C6orf124;                                                                                                                                            |
| N | Q9Y897 | CC | Catalyzes the oxidation of 3-carboxy-2-hydroxy-4- methylpentanoate (3-isopropylmalate) to 3-carboxy-4-methyl-2- oxopentanoate                                                         |
| N | Q9Y897 | CC | The product decarboxylates to 4-methyl-2 oxopentanoate.                                                                                                                               |
| N | Q9Y897 | DE | 3-isopropylmalate dehydrogenase;                                                                                                                                                      |
| N | Q9Y897 | DE | Beta-IPM dehydrogenase;                                                                                                                                                               |
| N | Q9Y897 | DR | 3-isopropylmalate dehydrogenase activity                                                                                                                                              |
| N | Q9Y897 | DR | leucine biosynthetic process                                                                                                                                                          |
| N | Q9Y897 | DR | magnesium ion binding                                                                                                                                                                 |
| N | Q9Y897 | DR | oxidation-reduction process                                                                                                                                                           |
| N | Q9YAD5 | CC | Transcription factor that plays a role in the activation of archaeal genes transcribed by RNA polymerase                                                                              |
| N | Q9YAD5 | CC | facilitates transcription initiation by enhancing TATA-box recognition by TATA-box-binding protein (tbp), and transcription factor B (tfb) and RNA polymerase recruitment             |
| N | Q9YAD5 | CC | It dynamically alters the nucleic acid-binding properties of RNA polymerases by stabilizing the initiation complex and destabilizing elongation complexes                             |
| N | Q9YAD5 | CC | Not absolutely required for transcription in vitro, but particularly important in cases where tbp or tfb function is not optimal                                                      |
| N | Q9YAD5 | CC | Seems to translocate with the RNA polymerase following initiation and acts by binding to the non template strand of the transcription bubble in elongation complexes (By similarity). |
| N | Q9YAD5 | DE | TFIIE subunit alpha homolog;                                                                                                                                                          |
| N | Q9YAD5 | DE | Transcription factor E;                                                                                                                                                               |
| N | Q9YAD5 | DE | Transcription initiation factor TFIIE;                                                                                                                                                |
| N | Q9YAD5 | DR | RNA polymerase II transcription factor activity                                                                                                                                       |
| N | Q9YAD5 | DR | regulation of transcription, DNA-dependent                                                                                                                                            |
| N | Q9YAD5 | DR | transcription initiation from RNA polymerase II promoter                                                                                                                              |
| N | Q9YAD5 | DR | zinc ion binding                                                                                                                                                                      |
| N | Q9YAS4 | CC | Converts HMG-CoA to mevalonate (By similarity).                                                                                                                                       |
| N | Q9YAS4 | DE | 3-hydroxy-3-methylglutaryl-coenzyme A reductase;                                                                                                                                      |
| N | Q9YAS4 | DE | HMG-CoA reductase;                                                                                                                                                                    |
| N | Q9YAS4 | DR | coenzyme A metabolic process                                                                                                                                                          |
| N | Q9YAS4 | DR | hydroxymethylglutaryl-CoA reductase (NADPH) activity                                                                                                                                  |
| N | Q9YAS4 | DR | isoprenoid biosynthetic process                                                                                                                                                       |
| N | Q9YAS4 | DR | oxidation-reduction process                                                                                                                                                           |
| N | Q9YBD6 | CC | The natural substrate for this enzyme may be peptidyl- tRNAs which drop off the ribosome during protein synthesis (By similarity).                                                    |

|   |        |    |                                                                                                                                                                                                                         |
|---|--------|----|-------------------------------------------------------------------------------------------------------------------------------------------------------------------------------------------------------------------------|
| N | Q9YBD6 | DE | Peptidyl-tRNA hydrolase;                                                                                                                                                                                                |
| N | Q9YBD6 | DR | aminoacyl-tRNA hydrolase activity                                                                                                                                                                                       |
| N | Q9YF40 | CC | Catalyzes the reversible phosphorylation of UMP to UDP (By similarity).                                                                                                                                                 |
| N | Q9YF40 | DE | UMP kinase;                                                                                                                                                                                                             |
| N | Q9YF40 | DE | Uridine monophosphate kinase;                                                                                                                                                                                           |
| N | Q9YF40 | DE | Uridylate kinase;                                                                                                                                                                                                       |
| N | Q9YF40 | DR | UMP kinase activity                                                                                                                                                                                                     |
| N | Q9YF40 | DR | cellular amino acid biosynthetic process                                                                                                                                                                                |
| N | Q9YF40 | DR | pyrimidine nucleotide biosynthetic process                                                                                                                                                                              |
| N | Q9YFI6 | DE | Dihydroorotate dehydrogenase;                                                                                                                                                                                           |
| N | Q9YFI6 | DE | Dihydroorotate oxidase;                                                                                                                                                                                                 |
| N | Q9YFI6 | DR | 'de novo' pyrimidine base biosynthetic process                                                                                                                                                                          |
| N | Q9YFI6 | DR | UMP biosynthetic process                                                                                                                                                                                                |
| N | Q9YFI6 | DR | dihydroorotate oxidase activity                                                                                                                                                                                         |
| N | Q9YFI6 | DR | oxidation-reduction process                                                                                                                                                                                             |
| N | Q9YGI2 | CC | Binds to the nicotinic acetylcholine receptor (By similarity).                                                                                                                                                          |
| N | Q9YGI2 | DE | Probable weak neurotoxin NNAM1;                                                                                                                                                                                         |
| N | Q9YGI2 | DR | acetylcholine receptor inhibitor activity                                                                                                                                                                               |
| N | Q9YGI2 | DR | synaptic transmission                                                                                                                                                                                                   |
| N | Q9YH13 | CC | Sequence-specific transcription factor which is part of a developmental regulatory system that provides cells with specific positional identities on the anterior-posterior axis (By similarity).                       |
| N | Q9YH13 | DE | Homeobox protein Hox-C8;                                                                                                                                                                                                |
| N | Q9YH13 | DR | multicellular organismal development                                                                                                                                                                                    |
| N | Q9YH13 | DR | regulation of transcription, DNA-dependent                                                                                                                                                                              |
| N | Q9YH13 | DR | sequence-specific DNA binding                                                                                                                                                                                           |
| N | Q9YH13 | DR | sequence-specific DNA binding transcription factor activity                                                                                                                                                             |
| N | Q9YH13 | DR | transcription regulator activity                                                                                                                                                                                        |
| N | Q9Z0L0 | DE | 5T4 oncofetal trophoblast glycoprotein;                                                                                                                                                                                 |
| N | Q9Z0L0 | DE | 5T4 oncotrophoblast glycoprotein;                                                                                                                                                                                       |
| N | Q9Z0L0 | DE | Trophoblast glycoprotein;                                                                                                                                                                                               |
| N | Q9Z0N7 | CC | Probably important in cardiac repolarization                                                                                                                                                                            |
| N | Q9Z0N7 | CC | Associates with KCNE1 (MinK) to form the I(Ks) cardiac potassium current                                                                                                                                                |
| N | Q9Z0N7 | CC | Elicits a rapidly activating, potassium-selective outward current.                                                                                                                                                      |
| N | Q9Z0N7 | DE | IKs producing slow voltage-gated potassium channel subunit alpha KvLQT1;                                                                                                                                                |
| N | Q9Z0N7 | DE | Potassium voltage-gated channel subfamily KQT member 1;                                                                                                                                                                 |
| N | Q9Z0N7 | DE | Voltage-gated potassium channel subunit Kv7.1;                                                                                                                                                                          |
| N | Q9Z0N7 | DR | negative regulation of insulin secretion                                                                                                                                                                                |
| N | Q9Z0N7 | DR | outward rectifier potassium channel activity                                                                                                                                                                            |
| N | Q9Z0N7 | DR | response to chemical stimulus                                                                                                                                                                                           |
| N | Q9Z1Z1 | CC | Phosphorylates the alpha subunit of eukaryotic translation-initiation factor 2 (EIF2), leading to its inactivation and thus to a rapid reduction of translational initiation and repression of global protein synthesis |
| N | Q9Z1Z1 | CC | Serves as a critical effector of unfolded protein response (UPR)-induced G1 growth arrest due to the loss of cyclin D1 (By similarity).                                                                                 |
| N | Q9Z1Z1 | DE | Eukaryotic translation initiation factor 2-alpha kinase 3;                                                                                                                                                              |
| N | Q9Z1Z1 | DE | PRKR-like endoplasmic reticulum kinase;                                                                                                                                                                                 |
| N | Q9Z1Z1 | DE | Pancreatic eIF2-alpha kinase;                                                                                                                                                                                           |
| N | Q9Z1Z1 | DR | ER overload response                                                                                                                                                                                                    |
| N | Q9Z1Z1 | DR | endocrine pancreas development                                                                                                                                                                                          |
| N | Q9Z1Z1 | DR | endoplasmic reticulum unfolded protein response                                                                                                                                                                         |
| N | Q9Z1Z1 | DR | eukaryotic translation initiation factor 2alpha kinase activity                                                                                                                                                         |
| N | Q9Z1Z1 | DR | negative regulation of translational initiation in response to stress                                                                                                                                                   |
| N | Q9Z1Z1 | DR | protein autophosphorylation                                                                                                                                                                                             |
| N | Q9Z1Z1 | DR | protein homooligomerization                                                                                                                                                                                             |
| N | Q9Z265 | CC | Regulates cell cycle checkpoints and apoptosis in response to DNA damage, particularly to DNA double-strand breaks                                                                                                      |
| N | Q9Z265 | CC | inhibits CDK2/CDC2C phosphatase by phosphorylation, preventing the entry into mitosis                                                                                                                                   |
| N | Q9Z265 | CC | May also play a role in meiosis                                                                                                                                                                                         |
| N | Q9Z265 | CC | regulates the R53 tumor suppressor through phosphorylation at Thr-20 and Ser-22                                                                                                                                         |
| N | Q9Z265 | DE | Serine/threonine-protein kinase Chk2;                                                                                                                                                                                   |
| N | Q9Z265 | DR | metal ion binding                                                                                                                                                                                                       |
| N | Q9Z265 | DR | protein serine/threonine kinase activity                                                                                                                                                                                |
| N | Q9Z265 | DR | response to gamma radiation                                                                                                                                                                                             |
| N | Q9Z265 | DR | signal transduction in response to DNA damage                                                                                                                                                                           |

|   |        |    |                                                                                                                                                                                                                                                      |
|---|--------|----|------------------------------------------------------------------------------------------------------------------------------------------------------------------------------------------------------------------------------------------------------|
| N | Q9Z280 | CC | Implicated as a critical step in numerous cellular pathways, including signal transduction, membrane trafficking, and the regulation of mitosis                                                                                                      |
| N | Q9Z280 | CC | May be involved in the regulation of perinuclear intravesicular membrane traffic.                                                                                                                                                                    |
| N | Q9Z280 | DE | Choline phosphatase 1;                                                                                                                                                                                                                               |
| N | Q9Z280 | DE | Phosphatidylcholine-hydrolyzing phospholipase D1;                                                                                                                                                                                                    |
| N | Q9Z280 | DE | Phospholipase D1;                                                                                                                                                                                                                                    |
| N | Q9Z280 | DR | NAPE-specific phospholipase D activity                                                                                                                                                                                                               |
| N | Q9Z280 | DR | cell communication                                                                                                                                                                                                                                   |
| N | Q9Z280 | DR | defense response to Gram-positive bacterium                                                                                                                                                                                                          |
| N | Q9Z280 | DR | lipid catabolic process                                                                                                                                                                                                                              |
| N | Q9Z280 | DR | phosphatidylinositol binding                                                                                                                                                                                                                         |
| N | Q9Z280 | DR | phospholipase D activity                                                                                                                                                                                                                             |
| N | Q9Z7K9 | DE | 30S ribosomal protein S2;                                                                                                                                                                                                                            |
| N | Q9Z7K9 | DR | structural constituent of ribosome                                                                                                                                                                                                                   |
| N | Q9Z8Z9 | DE | Pentose-5-phosphate 3-epimerase;                                                                                                                                                                                                                     |
| N | Q9Z8Z9 | DE | Ribulose-phosphate 3-epimerase;                                                                                                                                                                                                                      |
| N | Q9Z8Z9 | DR | carbohydrate metabolic process                                                                                                                                                                                                                       |
| N | Q9Z8Z9 | DR | ribulose-phosphate 3-epimerase activity                                                                                                                                                                                                              |
| N | Q9ZDB1 | DE | Leucine--tRNA ligase;                                                                                                                                                                                                                                |
| N | Q9ZDB1 | DE | Leucyl-tRNA synthetase;                                                                                                                                                                                                                              |
| N | Q9ZDB1 | DR | leucine-tRNA ligase activity                                                                                                                                                                                                                         |
| N | Q9ZDB1 | DR | leucyl-tRNA aminoacylation                                                                                                                                                                                                                           |
| N | Q9ZDC9 | DE | Putative carboxypeptidase RP402;                                                                                                                                                                                                                     |
| N | Q9ZDC9 | DR | carboxypeptidase activity                                                                                                                                                                                                                            |
| N | Q9ZDC9 | DR | serine-type peptidase activity                                                                                                                                                                                                                       |
| N | Q9ZE17 | DE | Aspartate--tRNA ligase;                                                                                                                                                                                                                              |
| N | Q9ZE17 | DE | Aspartyl-tRNA synthetase;                                                                                                                                                                                                                            |
| N | Q9ZE17 | DR | aspartate-tRNA ligase activity                                                                                                                                                                                                                       |
| N | Q9ZE17 | DR | aspartyl-tRNA aminoacylation                                                                                                                                                                                                                         |
| N | Q9ZE17 | DR | nucleic acid binding                                                                                                                                                                                                                                 |
| N | Q9ZHA4 | DE | UPF0124 protein in ftsZ 3'region;                                                                                                                                                                                                                    |
| N | Q9ZJX1 | CC | Responsible for the release of ribosomes from messenger RNA at the termination of protein biosynthesis                                                                                                                                               |
| N | Q9ZJX1 | CC | May increase the efficiency of translation by recycling ribosomes from one round of translation to another (By similarity).                                                                                                                          |
| N | Q9ZJX1 | DE | Ribosome-recycling factor;                                                                                                                                                                                                                           |
| N | Q9ZJX1 | DE | Ribosome-releasing factor;                                                                                                                                                                                                                           |
| N | Q9ZK47 | DE | Carbon starvation protein A homolog;                                                                                                                                                                                                                 |
| N | Q9ZK47 | DR | cellular response to starvation                                                                                                                                                                                                                      |
| N | Q9ZK59 | CC | Cell wall formation<br>Catalyzes the transfer of a GlcNAc subunit on undecaprenyl-pyrophosphoryl-MurNAc-pentapeptide (lipid intermediate I) to form undecaprenyl-pyrophosphoryl-MurNAc- (pentapeptide)GlcNAc (lipid intermediate II) (By similarity) |
| N | Q9ZK59 | DE | UDP-N-acetylglucosamine--N-acetylmuramyl-(pentapeptide) pyrophosphoryl-undecaprenol N-acetylglucosamine transferase;                                                                                                                                 |
| N | Q9ZK59 | DE | Undecaprenyl-PP-MurNAc-pentapeptide-UDPGlcNAc GlcNAc transferase;                                                                                                                                                                                    |
| N | Q9ZK59 | DR | UDP-N-acetyl-D-glucosamine:N-acetylmuramoyl-L-alanyl-D-glutamyl-meso-2,6-diaminopimelyl-D-alanyl-D-alanine-diphosphoundecaprenol 4-beta-N-acetylglucosaminyltransferase activity                                                                     |
| N | Q9ZK59 | DR | UDP-N-acetylgalactosamine biosynthetic process                                                                                                                                                                                                       |
| N | Q9ZK59 | DR | carbohydrate binding                                                                                                                                                                                                                                 |
| N | Q9ZK59 | DR | cell division                                                                                                                                                                                                                                        |
| N | Q9ZK59 | DR | cellular cell wall organization                                                                                                                                                                                                                      |
| N | Q9ZK59 | DR | lipid glycosylation                                                                                                                                                                                                                                  |
| N | Q9ZK59 | DR | peptidoglycan biosynthetic process                                                                                                                                                                                                                   |
| N | Q9ZK59 | DR | regulation of cell shape                                                                                                                                                                                                                             |
| N | Q9ZK59 | DR | undecaprenyldiphospho-muramoylpentapeptide beta-N-acetylglucosaminyltransferase activity                                                                                                                                                             |
| N | Q9ZL42 | CC | Catalyzes the conversion of GTP to 2,5-diamino-6- ribosylamino-4(3H)-pyrimidinone 5'-phosphate (DARP), formate and pyrophosphate (By similarity).                                                                                                    |
| N | Q9ZL42 | DE | GTP cyclohydrolase II;                                                                                                                                                                                                                               |
| N | Q9ZL42 | DE | GTP cyclohydrolase-2;                                                                                                                                                                                                                                |
| N | Q9ZL42 | DR | GTP cyclohydrolase II activity                                                                                                                                                                                                                       |
| N | Q9ZL42 | DR | metal ion binding                                                                                                                                                                                                                                    |
| N | Q9ZL42 | DR | riboflavin biosynthetic process                                                                                                                                                                                                                      |

|   |        |    |                                                                                                                                                                                     |
|---|--------|----|-------------------------------------------------------------------------------------------------------------------------------------------------------------------------------------|
| N | Q9ZML9 | CC | NAD-binding protein involved in the addition of a carboxymethylaminomethyl (cmnm) group at the wobble position (U34) of certain tRNAs, forming tRNA-cmnm(5)s(2)U34 (By similarity). |
| N | Q9ZML9 | DE | Glucose-inhibited division protein A;                                                                                                                                               |
| N | Q9ZML9 | DE | tRNA uridine 5-carboxymethylaminomethyl modification enzyme MnmG;                                                                                                                   |
| N | Q9ZML9 | DR | flavin adenine dinucleotide binding                                                                                                                                                 |
| N | Q9ZML9 | DR | tRNA wobble uridine modification                                                                                                                                                    |
| N | Q9ZMP8 | DE | Lysine--tRNA ligase;                                                                                                                                                                |
| N | Q9ZMP8 | DE | Lysyl-tRNA synthetase;                                                                                                                                                              |
| N | Q9ZMP8 | DR | lysine-tRNA ligase activity                                                                                                                                                         |
| N | Q9ZMP8 | DR | lysyl-tRNA aminoacylation                                                                                                                                                           |
| N | Q9ZMP8 | DR | metal ion binding                                                                                                                                                                   |
| N | Q9ZMP8 | DR | nucleic acid binding                                                                                                                                                                |
| N | Q9ZPE9 | DE | 5'-adenylylsulfate reductase-like 6;                                                                                                                                                |
| N | Q9ZPE9 | DE | APR-like 6;                                                                                                                                                                         |
| N | Q9ZPE9 | DE | Adenosine 5'-phosphosulfate reductase-like 6;                                                                                                                                       |
| N | Q9ZPE9 | DR | cell redox homeostasis                                                                                                                                                              |
| N | Q9ZVL3 | CC | Stimulates the transcription of various genes by recognizing and binding to a CCAAT motif in promoters (By similarity).                                                             |
| N | Q9ZVL3 | DE | Nuclear transcription factor Y subunit C-3;                                                                                                                                         |
| N | Q9ZVL3 | DR | protein binding                                                                                                                                                                     |
| N | Q9ZVL3 | DR | sequence-specific DNA binding                                                                                                                                                       |
| N | A0ALD9 | DE | 2-phospho-D-glycerate hydro-lyase;                                                                                                                                                  |
| N | A0ALD9 | DE | 2-phosphoglycerate dehydratase;                                                                                                                                                     |
| N | A0ALD9 | CC | Catalyzes the reversible conversion of L- phosphoglycerate into phosphoenolpyruvate                                                                                                 |
| N | A0ALD9 | CC | It is essential for the degradation of carbohydrates via glycolysis (By similarity).                                                                                                |
| N | A0ALD9 | DR | magnesium ion binding                                                                                                                                                               |
| N | A0ALD9 | DR | phosphopyruvate hydratase activity                                                                                                                                                  |
| N | A1L3G9 | DE | Transmembrane protein 194A;                                                                                                                                                         |
| N | A1RXF3 | DE | Translation initiation factor 6;                                                                                                                                                    |
| N | A1RXF3 | CC | Binds to the 50S ribosomal subunit and prevents its association with the 30S ribosomal subunit to form the 70S initiation complex (By similarity).                                  |
| N | A1RXF3 | DR | ribosome binding                                                                                                                                                                    |
| N | A1RXF3 | DR | translation initiation factor activity                                                                                                                                              |
| N | A1RXF3 | DR | mature ribosome assembly                                                                                                                                                            |
| N | A2RG22 | DE | Probable rRNA maturation factor;                                                                                                                                                    |
| N | A2RG22 | CC | Involved in rRNA and/or ribosome maturation and assembly                                                                                                                            |
| N | A2RG22 | CC | Required for normal 5' and 3' processing of 16S, 23S and 5S rRNAs                                                                                                                   |
| N | A2RG22 | CC | May have metal-dependent hydrolase activity (By similarity).                                                                                                                        |
| N | A2RG22 | DR | metal ion binding                                                                                                                                                                   |
| N | A2RG22 | DR | metalloendopeptidase activity                                                                                                                                                       |
| N | A2RG22 | DR | rRNA processing                                                                                                                                                                     |
| N | A2RJT9 | DE | Dihydroorotate dehydrogenase A;                                                                                                                                                     |
| N | A2RJT9 | DE | DHodehase A;                                                                                                                                                                        |
| N | A2RJT9 | DE | Dihydroorotate oxidase A;                                                                                                                                                           |
| N | A2RJT9 | DR | dihydroorotate oxidase activity                                                                                                                                                     |
| N | A2RJT9 | DR | 'de novo' pyrimidine base biosynthetic process                                                                                                                                      |
| N | A2RJT9 | DR | oxidation-reduction process                                                                                                                                                         |
| N | A2RJT9 | DR | UMP biosynthetic process                                                                                                                                                            |
| N | A3D2L9 | DE | Ribonuclease HII;                                                                                                                                                                   |
| N | A3D2L9 | CC | Endonuclease that specifically degrades the RNA of RNA- DNA hybrids (By similarity).                                                                                                |
| N | A3D2L9 | DR | metal ion binding                                                                                                                                                                   |
| N | A3D2L9 | DR | ribonuclease H activity                                                                                                                                                             |
| N | A3PB16 | DE | NAD(P)H-quinone oxidoreductase subunit 3;                                                                                                                                           |
| N | A3PB16 | DE | NAD(P)H dehydrogenase subunit 3;                                                                                                                                                    |
| N | A3PB16 | DE | NADH-plastoquinone oxidoreductase subunit 3;                                                                                                                                        |
| N | A3PB16 | DE | NDH-1 subunit 3;                                                                                                                                                                    |
| N | A3PB16 | CC | NDH-1 shuttles electrons from an unknown electron donor, via FMN and iron-sulfur (Fe-S) centers, to quinones in the respiratory and/or the photosynthetic chain                     |
| N | A3PB16 | CC | The immediate electron acceptor for the enzyme in this species is believed to be plastoquinone                                                                                      |
| N | A3PB16 | CC | Couples the redox reaction to proton translocation, and thus conserves the redox energy in a proton gradient                                                                        |

|   |        |    |                                                                                                                                                                                                                          |
|---|--------|----|--------------------------------------------------------------------------------------------------------------------------------------------------------------------------------------------------------------------------|
| N | A3PB16 | CC | Cyanobacterial NDH-1 also plays a role in inorganic carbon- concentration (By similarity).                                                                                                                               |
| N | A3PB16 | DR | NADH dehydrogenase (ubiquinone) activity                                                                                                                                                                                 |
| N | A3PB16 | DR | quinone binding                                                                                                                                                                                                          |
| N | A3PB16 | DR | oxidation-reduction process                                                                                                                                                                                              |
| N | A4G709 | DE | 50S ribosomal protein L9;                                                                                                                                                                                                |
| N | A4G709 | CC | Binds to the 23S rRNA (By similarity).                                                                                                                                                                                   |
| N | A4G709 | DR | structural constituent of ribosome                                                                                                                                                                                       |
| N | A4IJL3 | DE | 30S ribosomal protein S11;                                                                                                                                                                                               |
| N | A4IJL3 | CC | Located on the platform of the 30S subunit, it bridges several disparate RNA helices of the 16S rRNA                                                                                                                     |
| N | A4IJL3 | CC | Forms part of the Shine-Dalgarno cleft in the 70S ribosome (By similarity).                                                                                                                                              |
| N | A4IJL3 | DR | structural constituent of ribosome                                                                                                                                                                                       |
| N | A4SQX0 | DE | ribosyl 4-deoxy-4-formamido-L-arabinose-phosphoundecaprenol deformylase activity                                                                                                                                         |
| N | A4SQX0 | CC | Catalyzes the deformylation of 4-deoxy-4-formamido-L- arabinose-phosphoundecaprenol to 4-amino-4-deoxy-L-arabinose- phosphoundecaprenol                                                                                  |
| N | A4SQX0 | CC | The modified arabinose is attached to lipid A and is required for resistance to polymyxin and cationic antimicrobial peptides (By similarity).                                                                           |
| N | A4SQX0 | DR | hydrolase activity, acting on carbon-nitrogen (but not peptide) bonds, in linear amides                                                                                                                                  |
| N | A4SQX0 | DR | lipid A biosynthetic process                                                                                                                                                                                             |
| N | A4SQX0 | DR | response to antibiotic                                                                                                                                                                                                   |
| N | A5E0U9 | DE | ATP-dependent RNA helicase DBP8;                                                                                                                                                                                         |
| N | A5E0U9 | CC | ATP-binding RNA helicase involved in 40S ribosomal subunit biogenesis and is required for the normal formation of 18S rRNAs through pre-rRNA processing at A0, A1 and A2 sites                                           |
| N | A5E0U9 | CC | Required for vegetative growth (By similarity).                                                                                                                                                                          |
| N | A5E0U9 | DR | ATP-dependent helicase activity                                                                                                                                                                                          |
| N | A5E0U9 | DR | rRNA processing                                                                                                                                                                                                          |
| N | A6LPS9 | DE | 50S ribosomal protein L30;                                                                                                                                                                                               |
| N | A6LPS9 | DR | structural constituent of ribosome                                                                                                                                                                                       |
| N | A6VCJ8 | DE | 30S ribosomal protein S15;                                                                                                                                                                                               |
| N | A6VCJ8 | CC | One of the primary rRNA binding proteins, it binds directly to 16S rRNA where it helps nucleate assembly of the platform of the 30S subunit by binding and bridging several RNA helices of the 16S rRNA (By similarity). |
| N | A6VCJ8 | DR | structural constituent of ribosome                                                                                                                                                                                       |
| N | A7FHL4 | DE | Transcriptional regulator slyA;                                                                                                                                                                                          |
| N | A7FHL4 | CC | transcription regulator that can both activate or repress expression (By similarity)                                                                                                                                     |
| N | A7FHL4 | DR | sequence-specific DNA binding transcription factor activity                                                                                                                                                              |
| N | A7FHL4 | DR | regulation of transcription, DNA-dependent                                                                                                                                                                               |
| N | A7ZZM6 | DE | Exoribonuclease 2;                                                                                                                                                                                                       |
| N | A7ZZM6 | DE | Exoribonuclease II;                                                                                                                                                                                                      |
| N | A7ZZM6 | DE | Ribonuclease II;                                                                                                                                                                                                         |
| N | A7ZZM6 | CC | Involved in mRNA degradation                                                                                                                                                                                             |
| N | A7ZZM6 | CC | Hydrolyzes single-stranded polyribonucleotides processively in the 3' to 5' direction (By similarity).                                                                                                                   |
| N | A7ZZM6 | DR | exoribonuclease II activity                                                                                                                                                                                              |
| N | A7ZZM6 | DR | RNA catabolic process                                                                                                                                                                                                    |
| N | A8M519 | DE | 50S ribosomal protein L14;                                                                                                                                                                                               |
| N | A8M519 | CC | Binds to 23S rRNA                                                                                                                                                                                                        |
| N | A8M519 | CC | Forms part of two intersubunit bridges in the 70S ribosome (By similarity).                                                                                                                                              |
| N | A8M519 | DR | structural constituent of ribosome                                                                                                                                                                                       |
| N | A8Y7P6 | DE | Trypsin inhibitor B6;                                                                                                                                                                                                    |
| N | A8Y7P6 | DE | Trypsin inhibitor 6;                                                                                                                                                                                                     |
| N | A8Y7P6 | CC | Inhibits trypsin (By similarity).                                                                                                                                                                                        |
| N | A8Y7P6 | DR | serine-type endopeptidase inhibitor activity                                                                                                                                                                             |
| N | A9N141 | DE | Cysteine desulfuration protein sufE;                                                                                                                                                                                     |
| N | A9N141 | CC | Participates in cysteine desulfuration mediated by sufS                                                                                                                                                                  |
| N | A9N141 | CC | Cysteine desulfuration mobilizes sulfur from L-cysteine to yield L-alanine and constitutes an essential step in sulfur metabolism for biosynthesis of a variety of sulfur-containing biomolecules                        |
| N | A9N141 | CC | Functions as a sulfur acceptor for sufS, by mediating the direct transfer of the sulfur atom from the S-sulfanylcysteine of sufS, an intermediate product of cysteine desulfuration process (By similarity).             |
| N | A9R2Y6 | DE | Na(+)-translocating NADH-quinone reductase subunit A;                                                                                                                                                                    |
| N | A9R2Y6 | DE | Na(+)-NQR subunit A;                                                                                                                                                                                                     |

|   |        |    |                                                                                                                                                                             |
|---|--------|----|-----------------------------------------------------------------------------------------------------------------------------------------------------------------------------|
| N | A9R2Y6 | DE | Na(+)-translocating NQR subunit A;                                                                                                                                          |
| N | A9R2Y6 | DE | NQR complex subunit A;                                                                                                                                                      |
| N | A9R2Y6 | DE | NQR-1 subunit A;                                                                                                                                                            |
| N | A9R2Y6 | CC | NQR complex catalyzes the reduction of ubiquinone-1 to ubiquinol by two successive reactions, coupled with the transport of Na(+) ions from the cytoplasm to the periplasm. |
| N | A9R2Y6 | CC | NqrA to nqrE are probably involved in the second step, the conversion of ubisemiquinone to ubiquinol (By similarity).                                                       |
| N | A9R2Y6 | DR | oxidoreductase activity, acting on NADH or NADPH, quinone or similar compound as acceptor                                                                                   |
| N | A9R2Y6 | DR | oxidation-reduction process                                                                                                                                                 |
| N | A9R2Y6 | DR | sodium ion transport                                                                                                                                                        |
| N | A9R3T6 | DE | Acid shock protein;                                                                                                                                                         |
| N | A9R3T6 | CC | Required for growth and/or survival at acidic conditions (By similarity).                                                                                                   |
| N | A9R3T6 | DR | response to acidity                                                                                                                                                         |
| N | A9R5M0 | DE | Glycogen synthase;                                                                                                                                                          |
| N | A9R5M0 | DE | Starch [bacterial glycogen] synthase;                                                                                                                                       |
| N | A9R5M0 | CC | Synthesizes alpha-1,4-glucan chains using ADP-glucose (By similarity).                                                                                                      |
| N | A9R5M0 | DR | starch synthase activity                                                                                                                                                    |
| N | A9R5M0 | DR | glycogen biosynthetic process                                                                                                                                               |
| N | A9VP76 | DE | 30S ribosomal protein S10;                                                                                                                                                  |
| N | A9VP76 | CC | Involved in the binding of tRNA to the ribosomes (By similarity).                                                                                                           |
| N | A9VP76 | DR | structural constituent of ribosome                                                                                                                                          |
| N | B0SNK3 | DE | Glutamate-1-semialdehyde 2,1-aminomutase;                                                                                                                                   |
| N | B0SNK3 | DE | Glutamate-1-semialdehyde aminotransferase;                                                                                                                                  |
| N | B0SNK3 | DR | glutamate-1-semialdehyde 2,1-aminomutase activity                                                                                                                           |
| N | B0SNK3 | DR | pyridoxal phosphate binding                                                                                                                                                 |
| N | B0SNK3 | DR | transaminase activity                                                                                                                                                       |
| N | B0SNK3 | DR | porphyrin biosynthetic process                                                                                                                                              |
| N | B2KC93 | DE | Ribosome maturation factor rimP;                                                                                                                                            |
| N | B2KC93 | CC | Required for maturation of 30S ribosomal subunits (By similarity).                                                                                                          |
| N | B2KC93 | DR | ribosome biogenesis                                                                                                                                                         |
| N | B2SFE5 | DE | 50S ribosomal protein L19;                                                                                                                                                  |
| N | B2SFE5 | CC | This protein is located at the 50S-50S ribosomal subunit interface and may play a role in the structure and function of the aminoacyl-tRNA binding site (By similarity).    |
| N | B2SFE5 | DR | structural constituent of ribosome                                                                                                                                          |
| N | B3GYU5 | DE | 50S ribosomal protein L1;                                                                                                                                                   |
| N | B3GYU5 | CC | Binds directly to 23S rRNA                                                                                                                                                  |
| N | B3GYU5 | CC | The L1 stalk is quite mobile in the ribosome, and is involved in E site tRNA release (By similarity).                                                                       |
| N | B3GYU5 | DR | structural constituent of ribosome                                                                                                                                          |
| N | B3GYU5 | DR | regulation of translation                                                                                                                                                   |
| N | B3GYU5 | DR | RNA processing                                                                                                                                                              |
| N | B4KBH3 | DE | Molybdopterin synthase catalytic subunit;                                                                                                                                   |
| N | B4KBH3 | DE | Molybdenum cofactor synthesis protein 2 large subunit;                                                                                                                      |
| N | B4KBH3 | DE | Molybdenum cofactor synthesis protein 2B;                                                                                                                                   |
| N | B4KBH3 | CC | Catalytic subunit of the molybdopterin synthase complex, a complex that catalyzes the conversion of precursor Z into molybdopterin                                          |
| N | B4KBH3 | CC | Acts by mediating the incorporation of 2 sulfur atoms from thiocarboxylated MOCS2A into precursor Z to generate a dithiolene group (By similarity).                         |
| N | B4KBH3 | DR | Mo-molybdopterin synthase activity                                                                                                                                          |
| N | B4KBH3 | DR | transferase activity                                                                                                                                                        |
| N | B4KBH3 | DR | Mo-molybdopterin cofactor biosynthetic process                                                                                                                              |
| N | B4M357 | DE | Ubiquitin-like modifier-activating enzyme 5;                                                                                                                                |
| N | B4M357 | DE | Ubiquitin-activating enzyme 5;                                                                                                                                              |
| N | B4M357 | CC | E1-like enzyme which activates UFM1 (By similarity).                                                                                                                        |
| N | B4M357 | DR | cofactor binding                                                                                                                                                            |
| N | B4M357 | DR | metal ion binding                                                                                                                                                           |
| N | B4M357 | DR | oxidoreductase activity, acting on the CH-OH group of donors, NAD or NADP as acceptor                                                                                       |
| N | B4N369 | DE | Mitotic-spindle organizing protein 1;                                                                                                                                       |
| N | B4N369 | DE | Mitotic-spindle organizing protein associated with a ring of gamma-tubulin 1;                                                                                               |
| N | B4N369 | CC | Required for gamma-tubulin complex recruitment to the centrosome (By similarity).                                                                                           |
| N | B5XIE3 | DE | Probable tRNA threonylcarbamoyladenosine biosynthesis protein Gcp;                                                                                                          |
| N | B5XIE3 | DE | t(6)A37 threonylcarbamoyladenosine biosynthesis protein;                                                                                                                    |

|   |        |    |                                                                                                                                                                                                                                      |
|---|--------|----|--------------------------------------------------------------------------------------------------------------------------------------------------------------------------------------------------------------------------------------|
| N | B5XIE3 | CC | required for the formation of a threonylcarbamoyl group on adenosine at position 37 (t(6)A37) in tRNAs that read codons beginning with adenine (By similarity)                                                                       |
| N | B5XIE3 | DR | metal ion binding                                                                                                                                                                                                                    |
| N | B5XIE3 | DR | metalloendopeptidase activity                                                                                                                                                                                                        |
| N | B5ZBS9 | DE | Urease subunit alpha;                                                                                                                                                                                                                |
| N | B5ZBS9 | DE | Urea amidohydrolase subunit alpha;                                                                                                                                                                                                   |
| N | B5ZBS9 | DR | nickel ion binding                                                                                                                                                                                                                   |
| N | B5ZBS9 | DR | urease activity                                                                                                                                                                                                                      |
| N | B5ZBS9 | DR | urea metabolic process                                                                                                                                                                                                               |
| N | B5ZS20 | DE | Ribonuclease HII;                                                                                                                                                                                                                    |
| N | B5ZS20 | CC | Endonuclease that specifically degrades the RNA of RNA- DNA hybrids (By similarity).                                                                                                                                                 |
| N | B5ZS20 | DR | metal ion binding                                                                                                                                                                                                                    |
| N | B5ZS20 | DR | ribonuclease H activity                                                                                                                                                                                                              |
| N | B7ULM0 | DE | Protein tolB;                                                                                                                                                                                                                        |
| N | B7ULM0 | CC | Involved in the tonB-independent uptake of proteins (By similarity).                                                                                                                                                                 |
| N | B7ULM0 | DR | protein import                                                                                                                                                                                                                       |
| N | B8DHZ4 | DE | Ribonuclease PH;                                                                                                                                                                                                                     |
| N | B8DHZ4 | DE | tRNA nucleotidyltransferase;                                                                                                                                                                                                         |
| N | B8DHZ4 | CC | Phosphorolytic exoribonuclease that removes nucleotide residues following the - CCA terminus of tRNA and adds nucleotides to the ends of RNA molecules by using nucleoside diphosphates as substrates (By similarity).               |
| N | B8DHZ4 | DR | 3'-5'-exoribonuclease activity                                                                                                                                                                                                       |
| N | B8DHZ4 | DR | tRNA nucleotidyltransferase activity                                                                                                                                                                                                 |
| N | B8DHZ4 | DR | tRNA-specific ribonuclease activity                                                                                                                                                                                                  |
| N | B8DHZ4 | DR | tRNA processing                                                                                                                                                                                                                      |
| N | B8GSD2 | DE | Beta-hexosaminidase;                                                                                                                                                                                                                 |
| N | B8GSD2 | DE | Beta-N-acetylhexosaminidase;                                                                                                                                                                                                         |
| N | B8GSD2 | DE | N-acetyl-beta-glucosaminidase;                                                                                                                                                                                                       |
| N | B8GSD2 | CC | Cleaves GlcNAc linked beta-1,4 to MurNAc tripeptides (By similarity).                                                                                                                                                                |
| N | B8GSD2 | DR | beta-N-acetylhexosaminidase activity                                                                                                                                                                                                 |
| N | B8GSD2 | DR | cell division                                                                                                                                                                                                                        |
| N | B8GSD2 | DR | cellular cell wall organization                                                                                                                                                                                                      |
| N | B8GSD2 | DR | peptidoglycan biosynthetic process                                                                                                                                                                                                   |
| N | B8GSD2 | DR | regulation of cell shape                                                                                                                                                                                                             |
| N | C1DK16 | DE | Thymidylate synthase;                                                                                                                                                                                                                |
| N | C1DK16 | CC | Provides the sole de novo source of dTMP for DNA biosynthesis (By similarity).                                                                                                                                                       |
| N | C1DK16 | DR | thymidylate synthase activity                                                                                                                                                                                                        |
| N | C1DK16 | DR | dTMP biosynthetic process                                                                                                                                                                                                            |
| N | C3K225 | DE | Ketol-acid reductoisomerase;                                                                                                                                                                                                         |
| N | C3K225 | DE | Acetohydroxy-acid isomeroreductase;                                                                                                                                                                                                  |
| N | C3K225 | DE | Alpha-keto-beta-hydroxylacil reductoisomerase;                                                                                                                                                                                       |
| N | C3K225 | DR | coenzyme binding                                                                                                                                                                                                                     |
| N | C3K225 | DR | ketol-acid reductoisomerase activity                                                                                                                                                                                                 |
| N | C3K225 | DR | branched chain family amino acid biosynthetic process                                                                                                                                                                                |
| N | C3K225 | DR | oxidation-reduction process                                                                                                                                                                                                          |
| N | C4KIJ3 | DE | Prefoldin subunit alpha;                                                                                                                                                                                                             |
| N | C4KIJ3 | DE | GimC subunit alpha;                                                                                                                                                                                                                  |
| N | C4KIJ3 | CC | Molecular chaperone capable of stabilizing a range of proteins                                                                                                                                                                       |
| N | C4KIJ3 | CC | Seems to fulfill an ATP-independent, HSP70-like function in archaeal de novo protein folding (By similarity).                                                                                                                        |
| N | C4KIJ3 | DR | unfolded protein binding                                                                                                                                                                                                             |
| N | C4KIJ3 | DR | protein folding                                                                                                                                                                                                                      |
| N | O26103 | DE | 4-hydroxythreonine-4-phosphate dehydrogenase;                                                                                                                                                                                        |
| N | O26103 | DE | 4-(phosphohydroxy)-L-threonine dehydrogenase;                                                                                                                                                                                        |
| N | O26103 | CC | Catalyzes the NAD(P)-dependent oxidation of 4- (phosphohydroxy)-L-threonine (HTP) into 2-amino-3-oxo-4- (phosphohydroxy)butyric acid which spontaneously decarboxylates to form 3-amino-2-oxopropyl phosphate (AHAP) (By similarity) |
| N | O26103 | DR | 4-hydroxythreonine-4-phosphate dehydrogenase activity                                                                                                                                                                                |
| N | O26103 | DR | metal ion binding                                                                                                                                                                                                                    |
| N | O26103 | DR | oxidation-reduction process                                                                                                                                                                                                          |
| N | O26103 | DR | pyridoxine biosynthetic process                                                                                                                                                                                                      |
| N | O26368 | DE | 30S ribosomal protein S27ae;                                                                                                                                                                                                         |
| N | O26368 | DR | metal ion binding                                                                                                                                                                                                                    |
| N | O26368 | DR | structural constituent of ribosome                                                                                                                                                                                                   |

|   |        |    |                                                                                                                                                                                                                                                                                                 |
|---|--------|----|-------------------------------------------------------------------------------------------------------------------------------------------------------------------------------------------------------------------------------------------------------------------------------------------------|
| N | O95232 | DE | Luc7-like protein 3;                                                                                                                                                                                                                                                                            |
| N | O95232 | DE | Cisplatin resistance-associated-overexpressed protein;                                                                                                                                                                                                                                          |
| N | O95232 | DE | Okadaic acid-inducible phosphoprotein OA48-18;                                                                                                                                                                                                                                                  |
| N | O95232 | DE | cAMP regulatory element-associated protein 1;                                                                                                                                                                                                                                                   |
| N | O95232 | DE | CRE-associated protein 1;                                                                                                                                                                                                                                                                       |
| N | O95232 | CC | Binds cAMP regulatory element DNA sequence                                                                                                                                                                                                                                                      |
| N | O95232 | CC | May play a role in RNA splicing.                                                                                                                                                                                                                                                                |
| N | O95232 | DR | protein binding                                                                                                                                                                                                                                                                                 |
| N | O95232 | DR | mRNA processing                                                                                                                                                                                                                                                                                 |
| N | O95232 | DR | response to stress                                                                                                                                                                                                                                                                              |
| N | P02899 | DE | Uncharacterized kinetoplast minicircle 51 polypeptide;                                                                                                                                                                                                                                          |
| N | P05560 | DR | serine-type endopeptidase inhibitor activity                                                                                                                                                                                                                                                    |
| N | Q0IH73 | DE | Short-chain dehydrogenase/reductase family 42E member 1;                                                                                                                                                                                                                                        |
| N | Q0IH73 | DR | 3-beta-hydroxy-delta5-steroid dehydrogenase activity                                                                                                                                                                                                                                            |
| N | Q0IH73 | DR | oxidation-reduction process                                                                                                                                                                                                                                                                     |
| N | Q0IH73 | DR | steroid biosynthetic process                                                                                                                                                                                                                                                                    |
| N | P0A1U5 | DE | Uncharacterized protein yjaG;                                                                                                                                                                                                                                                                   |
| N | P12615 | DE | 12S seed storage globulin 1;                                                                                                                                                                                                                                                                    |
| N | P12615 | DE | 12S seed storage globulin 1 acidic chain;                                                                                                                                                                                                                                                       |
| N | P12615 | DE | 12S seed storage globulin 1 basic chain;                                                                                                                                                                                                                                                        |
| N | P12615 | CC | This is a seed storage protein.                                                                                                                                                                                                                                                                 |
| N | P12615 | DR | nutrient reservoir activity                                                                                                                                                                                                                                                                     |
| N | P14091 | DE | Cathepsin E;                                                                                                                                                                                                                                                                                    |
| N | P14091 | DE | Cathepsin E form I;                                                                                                                                                                                                                                                                             |
| N | P14091 | DE | Cathepsin E form II;                                                                                                                                                                                                                                                                            |
| N | P14091 | CC | May have a role in immune function                                                                                                                                                                                                                                                              |
| N | P14091 | CC | Probably involved in the processing of antigenic peptides during MHC class II-mediated antigen presentation                                                                                                                                                                                     |
| N | P14091 | CC | May play a role in activation-induced lymphocyte depletion in the thymus, and in neuronal degeneration and glial cell activation in the brain.                                                                                                                                                  |
| N | P14091 | DR | aspartic-type endopeptidase activity                                                                                                                                                                                                                                                            |
| N | P14091 | DR | antigen processing and presentation of exogenous peptide antigen via MHC class II                                                                                                                                                                                                               |
| N | P14318 | DE | Muscle-specific protein 20;                                                                                                                                                                                                                                                                     |
| N | P14318 | DR | protein binding                                                                                                                                                                                                                                                                                 |
| N | P14318 | DR | cell adhesion                                                                                                                                                                                                                                                                                   |
| N | P14318 | DR | myoblast fusion                                                                                                                                                                                                                                                                                 |
| N | P14318 | DR | regulation of cell shape                                                                                                                                                                                                                                                                        |
| N | P18295 | DE | Non-structural protein 1;                                                                                                                                                                                                                                                                       |
| N | P18295 | CC | Inhibits post-transcriptional processing of cellular pre-mRNA, by binding and inhibiting two cellular proteins that are required for the 3'-end processing of cellular pre-mRNAs: the 30 kDa cleavage and polyadenylation specificity factor (CPSF4) and the poly(A)-binding protein 2 (PABPN1) |
| N | P18295 | CC | This results in the accumulation of unprocessed 3' end pre-mRNAs which can't be exported from the nucleus                                                                                                                                                                                       |
| N | P18295 | CC | Cellular protein synthesis is thereby shut off very early after virus infection                                                                                                                                                                                                                 |
| N | P18295 | CC | Viral protein synthesis is not affected by the inhibition of the cellular 3' end processing machinery because the poly(A) tails of viral mRNAs are produced by the viral polymerase through a stuttering mechanism (By similarity).                                                             |
| N | P18295 | DR | evasion by virus of host immune response                                                                                                                                                                                                                                                        |
| N | P36831 | CC | E7 protein has both transforming and trans-activating activities                                                                                                                                                                                                                                |
| N | P36831 | CC | Disrupts the function of host retinoblastoma protein RB1/pRb, which is a key regulator of the cell cycle                                                                                                                                                                                        |
| N | P36831 | CC | Induces the disassembly of the E2F1 transcription factors from RB1, with subsequent transcriptional activation of E2F1-regulated S-phase genes                                                                                                                                                  |
| N | P36831 | CC | inactivation of the ability of RB1 to arrest the cell cycle is crucial for cellular transformation, uncontrolled cellular growth and proliferation induced by viral infection                                                                                                                   |
| N | P36831 | CC | Stimulation of progression from G1 to S phase allows the virus to efficiently use the cellular DNA replicating machinery to achieve viral genome replication                                                                                                                                    |
| N | P36831 | CC | Interferes with histone deacetylation mediated by HDAC1 and HDAC2, leading to activation of transcription (By similarity).                                                                                                                                                                      |
| N | P36831 | DR | metal ion binding                                                                                                                                                                                                                                                                               |
| N | P36831 | DR | sequence-specific DNA binding transcription factor activity                                                                                                                                                                                                                                     |
| N | P36831 | DR | evasion by virus of host immune response                                                                                                                                                                                                                                                        |
| N | P36831 | DR | regulation of transcription, DNA-dependent                                                                                                                                                                                                                                                      |
| N | P38583 | DE | Uncharacterized 9.1 kDa protein in BM1 immunity protein 3'region;                                                                                                                                                                                                                               |



|   |        |    |                                                                                                                                        |
|---|--------|----|----------------------------------------------------------------------------------------------------------------------------------------|
| N | P38764 | DE | 26S proteasome regulatory subunit RPN1;                                                                                                |
| N | P38764 | DE | HMG-CoA reductase degradation protein 2;                                                                                               |
| N | P38764 | DE | Proteasome non-ATPase subunit 1;                                                                                                       |
| N | P38764 | CC | Acts as a regulatory subunit of the 26S proteasome which is involved in the ATP-dependent degradation of ubiquitinated proteins.       |
| N | P38764 | DR | enzyme regulator activity                                                                                                              |
| N | P38764 | DR | protein binding, bridging                                                                                                              |
| N | P38764 | DR | regulation of protein catabolic process                                                                                                |
| N | P38764 | DR | ubiquitin-dependent protein catabolic process                                                                                          |
| N | P42252 | DE | Sec-independent protein translocase protein tatCd;                                                                                     |
| N | P42252 | CC | Required for correct localization of precursor proteins bearing signal peptides with the twin arginine conserved motif S/T-R-R-X-F-L-K |
| N | P42252 | CC | Required for phoD secretion                                                                                                            |
| N | P42252 | CC | TatCd promotes membrane localization of tatAd via domain specific interactions                                                         |
| N | P42252 | CC | TatCd is required for stable production of tatAd as well as for its maintenance.                                                       |
| N | P42252 | DR | protein transport                                                                                                                      |
| N | P42252 | DR | transmembrane transport                                                                                                                |
| N | P51833 | DE | Ribonuclease 3;                                                                                                                        |
| N | P51833 | DE | Ribonuclease III;                                                                                                                      |
| N | P51833 | CC | Digests double-stranded RNA                                                                                                            |
| N | P51833 | CC | Involved in the processing of ribosomal RNA precursors and of some mRNAs (By similarity).                                              |
| N | P51833 | DR | double-stranded RNA binding                                                                                                            |
| N | P51833 | DR | ribonuclease III activity                                                                                                              |
| N | P51833 | DR | RNA processing                                                                                                                         |
| N | P51833 | DR | rRNA catabolic process                                                                                                                 |
| N | P56379 | DE | 6.8 kDa mitochondrial proteolipid;                                                                                                     |
| N | P58404 | CC | Binds calmodulin in a calcium dependent manner                                                                                         |
| N | P58404 | CC | May function as scaffolding or signaling protein.                                                                                      |
| N | P58404 | DR | calmodulin binding                                                                                                                     |
| N | Q00239 | DE | Nitrogenase molybdenum-iron protein alpha chain;                                                                                       |
| N | Q00239 | DE | Dinitrogenase;                                                                                                                         |
| N | Q00239 | DE | Nitrogenase component I;                                                                                                               |
| N | Q00239 | CC | This molybdenum-iron protein is part of the nitrogenase complex that catalyzes the key enzymatic reactions in nitrogen fixation.       |
| N | Q00239 | DR | iron-sulfur cluster binding                                                                                                            |
| N | Q00239 | DR | metal ion binding                                                                                                                      |
| N | Q00239 | DR | nitrogenase activity                                                                                                                   |
| N | Q00239 | DR | nitrogen fixation                                                                                                                      |
| N | Q00239 | DR | oxidation-reduction process                                                                                                            |
| N | Q04ZD2 | DE | Anthranilate phosphoribosyltransferase;                                                                                                |
| N | Q04ZD2 | DR | anthranilate phosphoribosyltransferase activity                                                                                        |
| N | Q04ZD2 | DR | tryptophan biosynthetic process                                                                                                        |
| N | Q06GR4 | DE | Photosystem II CP43 chlorophyll apoprotein;                                                                                            |
| N | Q06GR4 | DE | PSII 43 kDa protein;                                                                                                                   |
| N | Q06GR4 | DE | Photosystem II 44 kDa reaction center protein;                                                                                         |
| N | Q06GR4 | DE | Protein CP-43;                                                                                                                         |
| N | Q06GR4 | CC | One of the components of the core antenna complex of photosystem II                                                                    |
| N | Q06GR4 | CC | It binds chlorophyll and helps catalyze the primary light-induced photochemical processes of photosystem II (By similarity).           |
| N | Q06GR4 | DR | chlorophyll binding                                                                                                                    |
| N | Q06GR4 | DR | electron transporter, transferring electrons within the cyclic electron transport pathway of photosynthesis activity                   |
| N | Q06GR4 | DR | photosynthetic electron transport in photosystem II                                                                                    |
| N | Q06GR4 | DR | protein-chromophore linkage                                                                                                            |
| N | Q09596 | DE | Probable glutathione S-transferase 5;                                                                                                  |
| N | Q09596 | DE | GST class-sigma;                                                                                                                       |
| N | Q09596 | CC | Conjugation of reduced glutathione to a wide number of exogenous and endogenous hydrophobic electrophiles (By similarity).             |
| N | Q09596 | DR | glutathione transferase activity                                                                                                       |
| N | Q09596 | DR | determination of adult lifespan                                                                                                        |
| N | Q0BZX9 | DE | Nucleoside diphosphate kinase;                                                                                                         |
| N | Q0BZX9 | DE | NDP kinase;                                                                                                                            |
| N | Q0BZX9 | DE | Nucleoside-2-P kinase;                                                                                                                 |
| N | Q0BZX9 | CC | Major role in the synthesis of nucleoside triphosphates other than ATP                                                                 |

|   |        |    |                                                                                                                                                                                                                          |
|---|--------|----|--------------------------------------------------------------------------------------------------------------------------------------------------------------------------------------------------------------------------|
| N | Q0BZX9 | CC | The ATP gamma phosphate is transferred to the NDP beta phosphate via a ping-pong mechanism, using a phosphorylated active-site intermediate.                                                                             |
| N | Q0BZX9 | DR | metal ion binding                                                                                                                                                                                                        |
| N | Q0BZX9 | DR | nucleoside diphosphate kinase activity                                                                                                                                                                                   |
| N | Q0BZX9 | DR | CTP biosynthetic process                                                                                                                                                                                                 |
| N | Q0BZX9 | DR | GTP biosynthetic process                                                                                                                                                                                                 |
| N | Q0BZX9 | DR | UTP biosynthetic process                                                                                                                                                                                                 |
| N | Q14BV6 | DE | UPF0249 protein ydjC homolog;                                                                                                                                                                                            |
| N | Q14BV6 | DR | hydrolase activity, acting on carbon-nitrogen (but not peptide) bonds                                                                                                                                                    |
| N | Q14BV6 | DR | carbohydrate metabolic process                                                                                                                                                                                           |
| N | Q1CWZ9 | DE | Chemotaxis response regulator protein-glutamate methylesterase 5;                                                                                                                                                        |
| N | Q1CWZ9 | CC | Involved in the modulation of the chemotaxis system; catalyzes the demethylation of specific methylglutamate residues introduced into the chemoreceptors (methyl-accepting chemotaxis proteins) by CheR (By similarity). |
| N | Q1CWZ9 | DR | protein-glutamate methylesterase activity                                                                                                                                                                                |
| N | Q1CWZ9 | DR | two-component response regulator activity                                                                                                                                                                                |
| N | Q1CWZ9 | DR | regulation of transcription, DNA-dependent                                                                                                                                                                               |
| N | Q1RGA8 | DE | Phospho-N-acetylmuramoyl-pentapeptide-transferase;                                                                                                                                                                       |
| N | Q1RGA8 | DE | UDP-MurNAc-pentapeptide phosphotransferase;                                                                                                                                                                              |
| N | Q1RGA8 | CC | First step of the lipid cycle reactions in the biosynthesis of the cell wall peptidoglycan (By similarity).                                                                                                              |
| N | Q1RGA8 | DR | phospho-N-acetylmuramoyl-pentapeptide-transferase activity                                                                                                                                                               |
| N | Q1RGA8 | DR | UDP-N-acetylmuramoyl-L-alanyl-D-glutamyl-meso-2,6-diaminopimelyl-D-alanyl-D-alanine:undecaprenyl-phosphate transferase activity                                                                                          |
| N | Q1RGA8 | DR | cell division                                                                                                                                                                                                            |
| N | Q1RGA8 | DR | cellular cell wall organization                                                                                                                                                                                          |
| N | Q1RGA8 | DR | peptidoglycan biosynthetic process                                                                                                                                                                                       |
| N | Q1RGA8 | DR | regulation of cell shape                                                                                                                                                                                                 |
| N | Q27793 | DE | Bifunctional dihydrofolate reductase-thymidylate synthase;                                                                                                                                                               |
| N | Q27793 | DE | Dihydrofolate reductase;                                                                                                                                                                                                 |
| N | Q27793 | DE | Thymidylate synthase;                                                                                                                                                                                                    |
| N | Q27793 | CC | Bifunctional enzyme                                                                                                                                                                                                      |
| N | Q27793 | CC | Involved in de novo dTMP biosynthesis                                                                                                                                                                                    |
| N | Q27793 | CC | Key enzyme in folate metabolism                                                                                                                                                                                          |
| N | Q27793 | CC | Catalyzes an essential reaction for de novo glycine and purine synthesis, DNA precursor synthesis, and for the conversion of dUMP to dTMP.                                                                               |
| N | Q27793 | DR | dihydrofolate reductase activity                                                                                                                                                                                         |
| N | Q27793 | DR | thymidylate synthase activity                                                                                                                                                                                            |
| N | Q27793 | DR | dTMP biosynthetic process                                                                                                                                                                                                |
| N | Q27793 | DR | glycine biosynthetic process                                                                                                                                                                                             |
| N | Q27793 | DR | oxidation-reduction process                                                                                                                                                                                              |
| N | Q29L39 | DE | Protein purity of essence;                                                                                                                                                                                               |
| N | Q29L39 | CC | Has a role in growth of the perineurial glial layer of the larval peripheral nerve                                                                                                                                       |
| N | Q29L39 | CC | May have a role in male fertility and eye development or function                                                                                                                                                        |
| N | Q29L39 | CC | May bind calmodulin (By similarity).                                                                                                                                                                                     |
| N | Q29L39 | DR | calmodulin binding                                                                                                                                                                                                       |
| N | Q29L39 | DR | ubiquitin-protein ligase activity                                                                                                                                                                                        |
| N | Q29L39 | DR | zinc ion binding                                                                                                                                                                                                         |
| N | Q29L39 | DR | nervous system development                                                                                                                                                                                               |
| N | Q29L39 | DR | response to stimulus                                                                                                                                                                                                     |
| N | Q29L39 | DR | sperm individualization                                                                                                                                                                                                  |
| N | Q29L39 | DR | visual perception                                                                                                                                                                                                        |
| N | Q2L8Y5 | DE | 30S ribosomal protein S12, chloroplastic;                                                                                                                                                                                |
| N | Q2L8Y5 | CC | With S4 and S5 plays an important role in translational accuracy                                                                                                                                                         |
| N | Q2L8Y5 | CC | Located at the interface of the 30S and 50S subunits (By similarity).                                                                                                                                                    |
| N | Q2L8Y5 | DR | structural constituent of ribosome                                                                                                                                                                                       |
| N | Q2NQI4 | DE | 33 kDa chaperonin;                                                                                                                                                                                                       |
| N | Q2NQI4 | DE | Heat shock protein 33 homolog;                                                                                                                                                                                           |
| N | Q2NQI4 | CC | Redox regulated molecular chaperone                                                                                                                                                                                      |
| N | Q2NQI4 | CC | Protects both thermally unfolding and oxidatively damaged proteins from irreversible aggregation                                                                                                                         |
| N | Q2NQI4 | CC | Plays an important role in the bacterial defense system toward oxidative stress (By similarity).                                                                                                                         |
| N | Q2NQI4 | DR | unfolded protein binding                                                                                                                                                                                                 |
| N | Q2NQI4 | DR | protein folding                                                                                                                                                                                                          |

|   |        |    |                                                                                                                                                                                                       |
|---|--------|----|-------------------------------------------------------------------------------------------------------------------------------------------------------------------------------------------------------|
| N | Q2P9K6 | DE | Fructose-1,6-bisphosphatase class 1;                                                                                                                                                                  |
| N | Q2P9K6 | DE | FBPase class 1;                                                                                                                                                                                       |
| N | Q2P9K6 | DE | D-fructose-1,6-bisphosphate 1-phosphohydrolase class 1;                                                                                                                                               |
| N | Q2P9K6 | DR | fructose 1,6-bisphosphate 1-phosphatase activity                                                                                                                                                      |
| N | Q2P9K6 | DR | metal ion binding                                                                                                                                                                                     |
| N | Q2P9K6 | DR | carbohydrate metabolic process                                                                                                                                                                        |
| N | Q30X45 | DE | GTP cyclohydrolase foIE2;                                                                                                                                                                             |
| N | Q30X45 | CC | Converts GTP to 7,8-dihydroneopterin triphosphate (By similarity).                                                                                                                                    |
| N | Q30X45 | DR | GTP cyclohydrolase I activity                                                                                                                                                                         |
| N | Q30X45 | DR | oxidoreductase activity                                                                                                                                                                               |
| N | Q30X45 | DR | oxidation-reduction process                                                                                                                                                                           |
| N | Q30X45 | DR | purine base metabolic process                                                                                                                                                                         |
| N | Q46CG5 | DE | Glutamyl-tRNA synthetase;                                                                                                                                                                             |
| N | Q46CG5 | DE | Glutamate--tRNA ligase;                                                                                                                                                                               |
| N | Q46CG5 | CC | Catalyzes the attachment of glutamate to tRNA(Glu) in a two-step reaction: glutamate is first activated by ATP to form Glu-AMP and then transferred to the acceptor end of tRNA(Glu) (By similarity). |
| N | Q46CG5 | DR | glutamate-tRNA ligase activity                                                                                                                                                                        |
| N | Q46CG5 | DR | glutamyl-tRNA aminoacylation                                                                                                                                                                          |
| N | Q48E75 | DE | Ribosome maturation factor rimP;                                                                                                                                                                      |
| N | Q48E75 | CC | Required for maturation of 30S ribosomal subunits (By similarity).                                                                                                                                    |
| N | Q48E75 | DR | ribosome biogenesis                                                                                                                                                                                   |
| N | Q4R8X1 | DE | Endoplasmic reticulum-Golgi intermediate compartment protein 3;                                                                                                                                       |
| N | Q4R8X1 | CC | Possible role in transport between endoplasmic reticulum and Golgi (By similarity).                                                                                                                   |
| N | Q4R8X1 | DR | vesicle-mediated transport                                                                                                                                                                            |
| N | Q4WTT7 | DE | GPI mannosyltransferase 4;                                                                                                                                                                            |
| N | Q4WTT7 | DE | GPI mannosyltransferase IV;                                                                                                                                                                           |
| N | Q4WTT7 | CC | Alpha-1,2-mannosyltransferase involved in glycosylphosphatidylinositol-anchor biosynthesis                                                                                                            |
| N | Q4WTT7 | CC | Transfers a fourth mannose to trimannosyl-GPIs during GPI precursor assembly                                                                                                                          |
| N | Q4WTT7 | CC | The presence of a fourth mannose in GPI is essential in fungi (By similarity).                                                                                                                        |
| N | Q4WTT7 | DR | transferase activity, transferring glycosyl groups                                                                                                                                                    |
| N | Q4WTT7 | DR | GPI anchor biosynthetic process                                                                                                                                                                       |
| N | Q9V2C6 | DE | 2-phosphoglycerate kinase;                                                                                                                                                                            |
| N | Q9V2C6 | DR | kinase activity                                                                                                                                                                                       |
| N | Q9V2C6 | DR | phosphotransferase activity, carboxyl group as acceptor                                                                                                                                               |
| N | Q9A634 | DE | 2,3-bisphosphoglycerate-dependent phosphoglycerate mutase;                                                                                                                                            |
| N | Q9A634 | DE | BPG-dependent PGAM;                                                                                                                                                                                   |
| N | Q9A634 | DE | Phosphoglyceromutase;                                                                                                                                                                                 |
| N | Q9A634 | CC | Catalyzes the interconversion of 2-phosphoglycerate and 3-phosphoglycerate (By similarity).                                                                                                           |
| N | Q9A634 | DR | phosphoglycerate mutase activity                                                                                                                                                                      |
| N | Q98BJ6 | DE | Apolipoprotein N-acyltransferase;                                                                                                                                                                     |
| N | Q98BJ6 | DE | ALP N-acyltransferase;                                                                                                                                                                                |
| N | Q98BJ6 | CC | Transfers the fatty acyl group on membrane lipoproteins (By similarity).                                                                                                                              |
| N | Q98BJ6 | DR | hydrolase activity, acting on carbon-nitrogen (but not peptide) bonds                                                                                                                                 |
| N | Q98BJ6 | DR | N-acyltransferase activity                                                                                                                                                                            |
| N | Q98BJ6 | DR | lipoprotein biosynthetic process                                                                                                                                                                      |
| N | Q98BJ6 | DR | nitrogen compound metabolic process                                                                                                                                                                   |
| N | Q8Z4N0 | DE | Cysteine desulfurase;                                                                                                                                                                                 |
| N | Q8Z4N0 | CC | Catalyzes the removal of elemental sulfur and selenium atoms from cysteine and selenocysteine to produce alanine                                                                                      |
| N | Q8Z4N0 | CC | Functions as a sulfur delivery protein for NAD, biotin and Fe-S cluster synthesis                                                                                                                     |
| N | Q8Z4N0 | CC | Transfers sulfur on 'Cys-456' of ThiI in a transpersulfidation reaction                                                                                                                               |
| N | Q8Z4N0 | CC | Functions also as a selenium delivery protein in the pathway for the biosynthesis of selenophosphate (By similarity).                                                                                 |
| N | Q8Z4N0 | DR | cysteine desulfurase activity                                                                                                                                                                         |
| N | Q8Z4N0 | DR | pyridoxal phosphate binding                                                                                                                                                                           |
| N | Q8Z4N0 | DR | cysteine metabolic process                                                                                                                                                                            |
| N | Q8XXY2 | DE | Tryptophan synthase alpha chain;                                                                                                                                                                      |
| N | Q8XXY2 | CC | The alpha subunit is responsible for the aldol cleavage of indoleglycerol phosphate to indole and glyceraldehyde 3- phosphate.                                                                        |
| N | Q8XXY2 | DR | tryptophan synthase activity                                                                                                                                                                          |
| N | Q8TE23 | DE | Taste receptor type 1 member 2;                                                                                                                                                                       |
| N | Q8TE23 | DE | G-protein coupled receptor 71;                                                                                                                                                                        |

|   |        |    |                                                                                                                                                                                                                                         |
|---|--------|----|-----------------------------------------------------------------------------------------------------------------------------------------------------------------------------------------------------------------------------------------|
| N | Q8TE23 | DE | Sweet taste receptor T1R2;                                                                                                                                                                                                              |
| N | Q8TE23 | CC | Putative taste receptor                                                                                                                                                                                                                 |
| N | Q8TE23 | CC | TAS1R2/TAS1R3 recognizes diverse natural and synthetic sweeteners.                                                                                                                                                                      |
| N | Q8TE23 | DR | protein heterodimerization activity                                                                                                                                                                                                     |
| N | Q8TE23 | DR | taste receptor activity                                                                                                                                                                                                                 |
| N | Q8TE23 | DR | detection of chemical stimulus involved in sensory perception of sweet taste                                                                                                                                                            |
| N | Q8PC64 | DE | 4-diphosphocytidyl-2-C-methyl-D-erythritol kinase;                                                                                                                                                                                      |
| N | Q8PC64 | DE | 4-(cytidine-5'-diphospho)-2-C-methyl-D-erythritol kinase;                                                                                                                                                                               |
| N | Q8PC64 | CC | Catalyzes the phosphorylation of the position 2 hydroxy group of 4-diphosphocytidyl-2C-methyl-D-erythritol (By similarity).                                                                                                             |
| N | Q8PC64 | DR | 4-(cytidine 5'-diphospho)-2-C-methyl-D-erythritol kinase activity                                                                                                                                                                       |
| N | Q8PC64 | DR | terpenoid biosynthetic process                                                                                                                                                                                                          |
| N | Q8G1B4 | DE | NADH-quinone oxidoreductase subunit D;                                                                                                                                                                                                  |
| N | Q8G1B4 | DE | NADH dehydrogenase I subunit D;                                                                                                                                                                                                         |
| N | Q8G1B4 | DE | NDH-1 subunit D;                                                                                                                                                                                                                        |
| N | Q8G1B4 | CC | NDH-1 shuttles electrons from NADH, via FMN and iron- sulfur (Fe-S) centers, to quinones in the respiratory chain                                                                                                                       |
| N | Q8G1B4 | CC | The immediate electron acceptor for the enzyme in this species is believed to be ubiquinone                                                                                                                                             |
| N | Q8G1B4 | CC | Couples the redox reaction to proton translocation (for every two electrons transferred, four hydrogen ions are translocated across the cytoplasmic membrane), and thus conserves the redox energy in a proton gradient (By similarity) |
| N | Q8G1B4 | DR | NADH dehydrogenase (quinone) activity                                                                                                                                                                                                   |
| N | Q8G1B4 | DR | quinone binding                                                                                                                                                                                                                         |
| N | Q8G1B4 | DR | oxidation-reduction process                                                                                                                                                                                                             |
| N | Q8DGJ7 | DE | Bifunctional protein pyrR;                                                                                                                                                                                                              |
| N | Q8DGJ7 | DE | Pyrimidine operon regulatory protein;                                                                                                                                                                                                   |
| N | Q8DGJ7 | DE | Uracil phosphoribosyltransferase;                                                                                                                                                                                                       |
| N | Q8DGJ7 | CC | Regulates the transcription of the pyrimidine nucleotide (pyr) operon in response to exogenous pyrimidines (By similarity).                                                                                                             |
| N | Q8DGJ7 | DR | uracil phosphoribosyltransferase activity                                                                                                                                                                                               |
| N | Q8DGJ7 | DR | nucleoside metabolic process                                                                                                                                                                                                            |
| N | Q88M09 | DE | Methylthioribose-1-phosphate isomerase;                                                                                                                                                                                                 |
| N | Q88M09 | DE | MTR-1-P isomerase;                                                                                                                                                                                                                      |
| N | Q88M09 | DE | S-methyl-5-thioribose-1-phosphate isomerase;                                                                                                                                                                                            |
| N | Q88M09 | CC | Catalyzes the interconversion of methylthioribose-1- phosphate (MTR-1-P) into methylthioribulose-1-phosphate (MTRu-1-P) (By similarity).                                                                                                |
| N | Q88M09 | DR | S-methyl-5-thioribose-1-phosphate isomerase activity                                                                                                                                                                                    |
| N | Q88M09 | DR | methionine biosynthetic process                                                                                                                                                                                                         |
| N | Q7VIA8 | DE | Chorismate synthase;                                                                                                                                                                                                                    |
| N | Q7VIA8 | DE | 5-enolpyruvylshikimate-3-phosphate phospholyase;                                                                                                                                                                                        |
| N | Q7VIA8 | DR | chorismate synthase activity                                                                                                                                                                                                            |
| N | Q7VIA8 | DR | aromatic amino acid family biosynthetic process                                                                                                                                                                                         |
| N | Q7UDT8 | DE | 4-hydroxy-3-methylbut-2-enyl diphosphate reductase;                                                                                                                                                                                     |
| N | Q7UDT8 | CC | Converts 1-hydroxy-2-methyl-2-(E)-butenyl 4-diphosphate into isopentenyl diphosphate (IPP) and dimethylallyl diphosphate (DMAPP) (By similarity).                                                                                       |
| N | Q7UDT8 | DR | 3 iron, 4 sulfur cluster binding                                                                                                                                                                                                        |
| N | Q7UDT8 | DR | 4-hydroxy-3-methylbut-2-en-1-yl diphosphate reductase activity                                                                                                                                                                          |
| N | Q7UDT8 | DR | metal ion binding                                                                                                                                                                                                                       |
| N | Q7UDT8 | DR | isopentenyl diphosphate biosynthetic process, mevalonate-independent pathway                                                                                                                                                            |
| N | Q7UDT8 | DR | oxidation-reduction process                                                                                                                                                                                                             |
| N | Q7SHE8 | DE | Chromosome segregation in meiosis protein 3;                                                                                                                                                                                            |
| N | Q7SHE8 | CC | Forms a fork protection complex (FPC) with top-1 and which is required for chromosome segregation during meiosis and DNA damage repair                                                                                                  |
| N | Q7SHE8 | CC | FPC coordinates leading and lagging strand synthesis and moves with the replication fork                                                                                                                                                |
| N | Q7SHE8 | CC | FPC stabilizes replication forks in a configuration that is recognized by replication checkpoint sensors (By similarity).                                                                                                               |
| N | Q7SHE8 | DR | replication fork protection                                                                                                                                                                                                             |
| N | Q75BG6 | DE | J domain-containing protein 1;                                                                                                                                                                                                          |
| N | Q75BG6 | CC | Probable chaperone (By similarity).                                                                                                                                                                                                     |
| N | Q75BG6 | DR | heat shock protein binding                                                                                                                                                                                                              |
| N | Q75BG6 | DR | unfolded protein binding                                                                                                                                                                                                                |
| N | Q75BG6 | DR | protein folding                                                                                                                                                                                                                         |
| N | Q6LZH4 | DE | Ketol-acid reductoisomerase;                                                                                                                                                                                                            |
| N | Q6LZH4 | DE | Acetohydroxy-acid isomeroreductase;                                                                                                                                                                                                     |

|   |        |    |                                                                                                                                                                                                                     |
|---|--------|----|---------------------------------------------------------------------------------------------------------------------------------------------------------------------------------------------------------------------|
| N | Q6LZH4 | DE | Alpha-keto-beta-hydroxylacyl reductoisomerase;                                                                                                                                                                      |
| N | Q6LZH4 | DR | coenzyme binding                                                                                                                                                                                                    |
| N | Q6LZH4 | DR | ketol-acid reductoisomerase activity                                                                                                                                                                                |
| N | Q6LZH4 | DR | branched chain family amino acid biosynthetic process                                                                                                                                                               |
| N | Q6LZH4 | DR | oxidation-reduction process                                                                                                                                                                                         |
| N | Q6CZ80 | DE | Putative agmatine deiminase;                                                                                                                                                                                        |
| N | Q6CZ80 | DE | Agmatine iminohydrolase;                                                                                                                                                                                            |
| N | Q6CZ80 | DR | agmatine deiminase activity                                                                                                                                                                                         |
| N | Q6CZ80 | DR | putrescine biosynthetic process                                                                                                                                                                                     |
| N | Q6DF67 | DE | Isochorismatase domain-containing protein 2, mitochondrial;                                                                                                                                                         |
| N | Q6DF67 | DR | catalytic activity                                                                                                                                                                                                  |
| N | Q66HG0 | DE | E3 ubiquitin-protein ligase RNF13;                                                                                                                                                                                  |
| N | Q66HG0 | DE | RING finger protein 13;                                                                                                                                                                                             |
| N | Q66HG0 | CC | E3 ubiquitin-protein ligase that may play a role in controlling cell proliferation (By similarity).                                                                                                                 |
| N | Q66HG0 | DR | ubiquitin-protein ligase activity                                                                                                                                                                                   |
| N | Q66HG0 | DR | zinc ion binding                                                                                                                                                                                                    |
| N | Q66HG0 | DR | protein autoubiquitination                                                                                                                                                                                          |
| N | Q5WDT6 | DE | Homoserine kinase;                                                                                                                                                                                                  |
| N | Q5WDT6 | CC | Catalyzes the ATP-dependent phosphorylation of L- homoserine to L-homoserine phosphate (By similarity).                                                                                                             |
| N | Q5WDT6 | DR | homoserine kinase activity                                                                                                                                                                                          |
| N | Q5WDT6 | DR | threonine biosynthetic process                                                                                                                                                                                      |
| N | Q5KWB0 | DE | Acetyl-coenzyme A carboxylase carboxyl transferase subunit alpha;                                                                                                                                                   |
| N | Q5KWB0 | DE | ACCase subunit alpha;                                                                                                                                                                                               |
| N | Q5KWB0 | DE | Acetyl-CoA carboxylase carboxyltransferase subunit alpha;                                                                                                                                                           |
| N | Q5KWB0 | CC | Component of the acetyl coenzyme A carboxylase (ACC) complex                                                                                                                                                        |
| N | Q5KWB0 | CC | First, biotin carboxylase catalyzes the carboxylation of biotin on its carrier protein (BCCP) and then the CO(2) group is transferred by the carboxyltransferase to acetyl-CoA to form malonyl-CoA (By similarity). |
| N | Q5KWB0 | DR | acetyl-CoA carboxylase activity                                                                                                                                                                                     |
| N | Q5KWB0 | DR | fatty acid biosynthetic process                                                                                                                                                                                     |
| N | Q5F384 | DE | Protein YIPF3;                                                                                                                                                                                                      |
| N | Q5F384 | DE | YIP1 family member 3;                                                                                                                                                                                               |
| N | Q5F384 | CC | May play a role in hematopoiesis (By similarity).                                                                                                                                                                   |
| N | Q5F384 | DR | cell differentiation                                                                                                                                                                                                |
| N | Q4ZYY8 | DE | Oligoribonuclease;                                                                                                                                                                                                  |
| N | Q4ZYY8 | CC | 3'-to-5' exoribonuclease specific for small oligoribonucleotides (By similarity).                                                                                                                                   |
| N | Q4ZYY8 | DR | exonuclease activity                                                                                                                                                                                                |
| N | Q4ZYY8 | DR | nucleic acid binding                                                                                                                                                                                                |
| N | Q06817 | DE | Glycyl-tRNA synthetase 2;                                                                                                                                                                                           |
| N | Q06817 | DE | Diadenosine tetraphosphate synthetase;                                                                                                                                                                              |
| N | Q06817 | DE | AP-4-A synthetase;                                                                                                                                                                                                  |
| N | Q06817 | DE | Glycine--tRNA ligase 2;                                                                                                                                                                                             |
| N | Q06817 | CC | Catalyzes the attachment of glycine to tRNA(Gly)                                                                                                                                                                    |
| N | Q06817 | CC | Is also able produce diadenosine tetraphosphate (Ap4A), a universal pleiotropic signaling molecule needed for cell regulation pathways, by direct condensation of 2 ATPs (By similarity).                           |
| N | Q06817 | DR | glycine-tRNA ligase activity                                                                                                                                                                                        |
| N | Q06817 | DR | protein dimerization activity                                                                                                                                                                                       |
| N | Q06817 | DR | diadenosine tetraphosphate biosynthetic process                                                                                                                                                                     |
| N | Q06817 | DR | glycyl-tRNA aminoacylation                                                                                                                                                                                          |
| N | B0CEQ4 | DE | Glycyl-tRNA synthetase alpha subunit;                                                                                                                                                                               |
| N | B0CEQ4 | DE | Glycine--tRNA ligase alpha subunit;                                                                                                                                                                                 |
| N | B0CEQ4 | DR | glycine-tRNA ligase activity                                                                                                                                                                                        |
| N | B0CEQ4 | DR | glycyl-tRNA aminoacylation                                                                                                                                                                                          |
| N | A1TUT1 | DE | Glycyl-tRNA synthetase alpha subunit;                                                                                                                                                                               |
| N | A1TUT1 | DE | Glycine--tRNA ligase alpha subunit;                                                                                                                                                                                 |
| N | A1TUT1 | DR | glycine-tRNA ligase activity                                                                                                                                                                                        |
| N | A1TUT1 | DR | glycyl-tRNA aminoacylation                                                                                                                                                                                          |
| N | B9MCM3 | DE | Glycyl-tRNA synthetase alpha subunit;                                                                                                                                                                               |
| N | B9MCM3 | DE | Glycine--tRNA ligase alpha subunit;                                                                                                                                                                                 |
| N | B9MCM3 | DR | glycine-tRNA ligase activity                                                                                                                                                                                        |
| N | B9MCM3 | DR | glycyl-tRNA aminoacylation                                                                                                                                                                                          |
| N | A1W3F2 | DE | Glycyl-tRNA synthetase alpha subunit;                                                                                                                                                                               |

|   |        |    |                                       |
|---|--------|----|---------------------------------------|
| N | A1W3F2 | DE | Glycine--tRNA ligase alpha subunit;   |
| N | A1W3F2 | DR | glycine-tRNA ligase activity          |
| N | A1W3F2 | DR | glycyl-tRNA aminoacylation            |
| N | A3N398 | DE | Glycyl-tRNA synthetase alpha subunit; |
| N | A3N398 | DE | Glycine--tRNA ligase alpha subunit;   |
| N | A3N398 | DR | glycine-tRNA ligase activity          |
| N | A3N398 | DR | glycyl-tRNA aminoacylation            |
| N | B3GZ52 | DE | Glycyl-tRNA synthetase alpha subunit; |
| N | B3GZ52 | DE | Glycine--tRNA ligase alpha subunit;   |
| N | B3GZ52 | DR | glycine-tRNA ligase activity          |
| N | B3GZ52 | DR | glycyl-tRNA aminoacylation            |
| N | B0BSX2 | DE | Glycyl-tRNA synthetase alpha subunit; |
| N | B0BSX2 | DE | Glycine--tRNA ligase alpha subunit;   |
| N | B0BSX2 | DR | glycine-tRNA ligase activity          |
| N | B0BSX2 | DR | glycyl-tRNA aminoacylation            |
| N | A6VLE0 | DE | Glycyl-tRNA synthetase alpha subunit; |
| N | A6VLE0 | DE | Glycine--tRNA ligase alpha subunit;   |
| N | A6VLE0 | DR | glycine-tRNA ligase activity          |
| N | A6VLE0 | DR | glycyl-tRNA aminoacylation            |
| N | A0KEK0 | DE | Glycyl-tRNA synthetase alpha subunit; |
| N | A0KEK0 | DE | Glycine--tRNA ligase alpha subunit;   |
| N | A0KEK0 | DR | glycine-tRNA ligase activity          |
| N | A0KEK0 | DR | glycyl-tRNA aminoacylation            |
| N | A4STG2 | DE | Glycyl-tRNA synthetase alpha subunit; |
| N | A4STG2 | DE | Glycine--tRNA ligase alpha subunit;   |
| N | A4STG2 | DR | glycine-tRNA ligase activity          |
| N | A4STG2 | DR | glycyl-tRNA aminoacylation            |
| N | Q8UHP1 | DE | Glycyl-tRNA synthetase alpha subunit; |
| N | Q8UHP1 | DE | Glycine--tRNA ligase alpha subunit;   |
| N | Q8UHP1 | DR | glycine-tRNA ligase activity          |
| N | Q8UHP1 | DR | glycyl-tRNA aminoacylation            |
| N | B6EGT2 | DE | Glycyl-tRNA synthetase alpha subunit; |
| N | B6EGT2 | DE | Glycine--tRNA ligase alpha subunit;   |
| N | B6EGT2 | DR | glycine-tRNA ligase activity          |
| N | B6EGT2 | DR | glycyl-tRNA aminoacylation            |
| N | B4S278 | DE | Glycyl-tRNA synthetase alpha subunit; |
| N | B4S278 | DE | Glycine--tRNA ligase alpha subunit;   |
| N | B4S278 | DR | glycine-tRNA ligase activity          |
| N | B4S278 | DR | glycyl-tRNA aminoacylation            |
| N | B8JDD9 | DE | Glycyl-tRNA synthetase alpha subunit; |
| N | B8JDD9 | DE | Glycine--tRNA ligase alpha subunit;   |
| N | B8JDD9 | DR | glycine-tRNA ligase activity          |
| N | B8JDD9 | DR | glycyl-tRNA aminoacylation            |
| N | Q2IQJ6 | DE | Glycyl-tRNA synthetase alpha subunit; |
| N | Q2IQJ6 | DE | Glycine--tRNA ligase alpha subunit;   |
| N | Q2IQJ6 | DR | glycine-tRNA ligase activity          |
| N | Q2IQJ6 | DR | glycyl-tRNA aminoacylation            |
| N | B4UG88 | DE | Glycyl-tRNA synthetase alpha subunit; |
| N | B4UG88 | DE | Glycine--tRNA ligase alpha subunit;   |
| N | B4UG88 | DR | glycine-tRNA ligase activity          |
| N | B4UG88 | DR | glycyl-tRNA aminoacylation            |
| N | Q3M502 | DE | Glycyl-tRNA synthetase alpha subunit; |
| N | Q3M502 | DE | Glycine--tRNA ligase alpha subunit;   |
| N | Q3M502 | DR | glycine-tRNA ligase activity          |
| N | Q3M502 | DR | glycyl-tRNA aminoacylation            |
| N | O67081 | DE | Glycyl-tRNA synthetase alpha subunit; |
| N | O67081 | DE | Glycine--tRNA ligase alpha subunit;   |
| N | O67081 | DR | glycine-tRNA ligase activity          |
| N | O67081 | DR | glycyl-tRNA aminoacylation            |
| N | A8EW78 | DE | Glycyl-tRNA synthetase alpha subunit; |
| N | A8EW78 | DE | Glycine--tRNA ligase alpha subunit;   |
| N | A8EW78 | DR | glycine-tRNA ligase activity          |
| N | A8EW78 | DR | glycyl-tRNA aminoacylation            |
| N | A7Z6U1 | DE | Glycyl-tRNA synthetase alpha subunit; |
| N | A7Z6U1 | DE | Glycine--tRNA ligase alpha subunit;   |

|   |        |    |                                       |
|---|--------|----|---------------------------------------|
| N | A7Z6U1 | DR | glycine-tRNA ligase activity          |
| N | A7Z6U1 | DR | glycyl-tRNA aminoacylation            |
| N | Q9KD49 | DE | Glycyl-tRNA synthetase alpha subunit; |
| N | Q9KD49 | DE | Glycine--tRNA ligase alpha subunit;   |
| N | Q9KD49 | DR | glycine-tRNA ligase activity          |
| N | Q9KD49 | DR | glycyl-tRNA aminoacylation            |
| N | Q65H75 | DE | Glycyl-tRNA synthetase alpha subunit; |
| N | Q65H75 | DE | Glycine--tRNA ligase alpha subunit;   |
| N | Q65H75 | DR | glycine-tRNA ligase activity          |
| N | Q65H75 | DR | glycyl-tRNA aminoacylation            |
| N | A8FFB1 | DE | Glycyl-tRNA synthetase alpha subunit; |
| N | A8FFB1 | DE | Glycine--tRNA ligase alpha subunit;   |
| N | A8FFB1 | DR | glycine-tRNA ligase activity          |
| N | A8FFB1 | DR | glycyl-tRNA aminoacylation            |
| N | Q5WHD6 | DE | Glycyl-tRNA synthetase alpha subunit; |
| N | Q5WHD6 | DE | Glycine--tRNA ligase alpha subunit;   |
| N | Q5WHD6 | DR | glycine-tRNA ligase activity          |
| N | Q5WHD6 | DR | glycyl-tRNA aminoacylation            |
| N | P54380 | DE | Glycyl-tRNA synthetase alpha subunit; |
| N | P54380 | DE | Glycine--tRNA ligase alpha subunit;   |
| N | P54380 | DR | glycine-tRNA ligase activity          |
| N | P54380 | DR | glycyl-tRNA aminoacylation            |

---
